# Supplementary material
Source: PubMed Central journal article supplement (PMC5743547)
Supplement: NIHMS926541-supplement-Supplemental_information_PDF.pdf [file NIHMS926541-supplement-Supplemental_information_PDF.pdf]

## Supporting Information

### RESULTS

Since some gonocytes and Sertoli cells appeared outside the seminiferous cords in the P2.5 *Arid4b*SCKO testes (Fig. 1V and Supporting Information Fig. S2), we analyzed whether the boundary of the seminiferous tubules in the P2.5 *Arid4b*SCKO testes is still intact. In testes, peritubular myoid cells form a single layer surrounding the seminiferous cords, and together with Sertoli cells constitute the boundary of the seminiferous cords. Sertoli cells have been shown to control peritubular myoid cell fate [1, 2]. We performed double immunofluorescent staining for  $\alpha$ 2-smooth muscle actin (ACTA2, cytoplasmic) and WT1 (nuclear) to detect peritubular myoid cells and Sertoli cells, respectively. We found that the peritubular myoid cell layer surrounding the seminiferous cords was disturbed in the P2.5 *Arid4b*SCKO testes, while the peritubular myoid cell layer remained intact in the P2.5 control testes (Supporting Information Fig. S3). Together with the fact that most of Sertoli cells in the p2.5 *Arid4b*SCKO testes were no longer at the periphery of the seminiferous cords (Fig. 1N), these results suggest that the boundary of the seminiferous cords was perturbed in the P2.5 *Arid4b*SCKO testes.

The P1.5 testes were used to perform RNA-Seq analysis. Histological analyses revealed similar structure of the seminiferous cords between the control and *Arid4b*SCKO testes at P1.5 (Supporting Information Fig. S5, A-D). Immunofluorescent staining for AMH and WT1 further detected Sertoli cells at the periphery of seminiferous cords in both control and *Arid4b*SCKO testes at P1.5 (Supporting Information Fig. S5, E-H). In addition, double immunofluorescent staining for ACTA2 (cytoplasmic) and WT1 (nuclear) to detect peritubular myoid cells and Sertoli cells, respectively, confirmed the integrity of the seminiferous cord basement membrane

in both control and *Arid4b*SCKO testes at P1.5 (Supporting Information Fig. S5, G and H). Importantly, when TUNEL assay was performed to detect apoptotic cells, an increase of the TUNEL-positive cells was showed in the *Arid4b*SCKO testes at P2.5, but not at P1.5, compared with the respective control testes (Supporting Information Fig. S5, I-L). Quantification confirmed that total apoptotic cells increased only in the P2.5 *Arid4b*SCKO testes (Supporting Information Fig. S5, M). Together, the P1.5 *Arid4b*SCKO testes appeared to be normal compared to the control testes.

Although RNA-Seq and qRT-PCR analyses showed largely decreased transcripts of *Amh* in the P2.5 *Arid4b*SCKO testes (Fig. 4A, 4B), expression of *Amh* in the P10 *Arid4b*SCKO testes was elevated (Fig. 4B). At puberty, expression of AMH is switched off during Sertoli cell maturation. Therefore, absence of AMH is widely used as an indicator of Sertoli cell functional maturation. Immunofluorescent staining for AMH in the control testis at different stages showed high levels of AMH expression at E18.5 and P2.5, but the levels gradually reduced between P10 and P20, and became undetectable at P30 and P42 (Supporting information Fig. S9). On the other hand, expression of AMH in the *Arid4b*SCKO testes was found to be markedly reduced at P2.5, but was elevated at P10, remained prominent in many tubules at P20, and was still detectable at P30 (Supporting information Fig. S9). Our results are also consistent with the previous report that maturation of Sertoli cell was delayed in the *Arid4b*SCKO testes [3], as the abundance of AMH proteins in the *Arid4b*SCKO testes remained prominent during puberty (after P10) (Supporting information Fig. S9).

## MATERIALS AND METHODS

### Histological Analysis

Testes were dissected from male mice and fixed in Bouin's fluid (75% saturated picric acid, 5% glacial acetic acid, 9.3% formaldehyde). Histological analysis was performed on 7- $\mu$ m thick paraffin-embedded testis sections by hematoxylin and eosin staining.

### Immunofluorescent Staining

Testes were dissected from male mice and fixed in 4% paraformaldehyde in phosphate-buffered saline (PBS). Immunofluorescence analysis was performed on 7- $\mu$ m thick paraffin-embedded testis sections. Antigen retrieval was performed by boiling the testes sections in citric acid based antigen unmasking solution (Vector Laboratories). Samples were blocked with blocking solution (5% donkey serum, 2% bovine serum albumin, and 0.02% triton-X 100 in PBS), followed by incubation with primary antibodies in blocking solution. The primary antibodies are listed in Supporting Information Table S5. Sections were washed with 0.1% Triton X-100/PBS buffer, and incubated with horseradish peroxidase (*HRP*)-conjugated or biotinylated secondary antibodies (Jackson ImmunoResearch). Signal detection was carried out by Tyramide Signal Amplification system (Life Technology) or Alexa Fluor 488 Streptavidin (Molecular Probes, Life Technology). Sections were mounted with fluorescence mounting medium with DAPI (Vector Laboratories). Images were captured with a Nikon Eclipse *Ti-U* fluorescence microscope or a Carl Zeiss LSM 510 confocal microscope. Since the sizes of the control and *Arid4b*SCKO testes were similar at P2.5 of age (Supporting Information Fig. S4) [3],

cells positive for the markers used (i.e. WT1 and PLZF) were counted per testis section. Testes of three mice from each genotype and different litters were analyzed.

### **TUNEL Assays**

Testes were dissected from male mice and fixed in Bouin's fluid (75% saturated picric acid, 5% glacial acetic acid, 9.3% formaldehyde). For analysis of apoptosis, TUNEL assays were performed on 7- $\mu$ m thick paraffin-embedded testis sections. Testis sections were stained by *in situ* cell death detection kit (Roche Diagnostics), the terminal deoxynucleotidyltransferase-mediated dUTP-biotin nick end labeling (TUNEL) based assays. Since the sizes of the control and *Arid4b*SCKO testes were similar at P2.5 of age (Supporting Information Fig. S4) [3], quantifications were performed by counting the number of the TUNEL+ cells per testis section. Testes of three mice from each genotype and different litters were analyzed.

### **RNA-Seq Analysis**

Testes were dissected from the control and *Arid4b*SCKO males at P1.5. Each genotypic group consisted of three pools of testes, and each pool contained four testes. Total RNA was purified using an RNeasy plus kit (Qiagen), and was treated by DNase I (Qiagen). Purified RNA was processed for RNA-Seq analysis and initial data analysis (Expression Analysis). Database for Annotation, Visualization, and Integrated Discovery Bioinformatics Resources (DAVID) v6.7 (<http://david.abcc.ncifcrf.gov/>) and Gene Set Enrichment Analysis (GSEA) on the Molecular Signatures Databases (MSigDB) collection ([gsea@broadinstitute.org](mailto:gsea@broadinstitute.org)) analyses were

used on genes to identify enriched biological themes. The NCBI access number of raw data from the ChIP-Seq study is GSE84808.

### **qRT-PCR Analysis**

Testes were dissected from 3 *Arid4b*SCKO and 3 control males. Total RNA was purified from mouse testes using an RNeasy plus kit (Qiagen), and was treated by DNase I (Qiagen). Two micrograms of DNase I-treated total RNA was used for reverse transcription to synthesize the first strand cDNA by the Superscript III First-strand synthesis system (Life Technology). qPCR was performed on the ABI StepOne Plus machine using TaqMan gene expression assays (Applied Biosystems). The TaqMan primer/probe sets for genes are listed in Supporting Information Table S6. The *Gapdh* transcripts were amplified as an internal control to normalize gene expression. The levels of gene expression were normalized against the level of *Gapdh* expression in each sample. In each experiment, the normalized level of the gene of interest from one of the control mice was set as 1.

### **ChIP-Seq Analysis**

A pool of 108 testes dissected from wild type male mice at P1.5 was sent to Active Motif for ChIP, library preparation, sequencing, and initial data analysis. ChIP assays were performed using the anti-ARID4B antibody (A302-233A, Bethyl Laboratories). Input DNA was used for control. Gene calling was based on presence of the ARID4B binding site with 10 kb of the gene margin. The NCBI access number of raw data from the ChIP-Seq study is GSE84808.

### ChIP-qPCR Analysis

Testes dissected from 20 *Arid4b*SCKO and 20 control males at P1.5 of age were used for ChIP analysis on the *Gdnf* promoter. ChIP assays were performed as previously described method [3]. Chromatin extracted from mouse testes was immunoprecipitated with normal rabbit IgG or anti-ARID4B antibody (A302-233A, Bethyl Laboratories). DNA from immunoprecipitated chromatin was analyzed by qPCR using the primer sets listed in Supporting Information Table S7.

### Detection of RA activity

To detect the levels of RA, a previously described RA reporter assay was performed [4]. Briefly, HeLa cells were transfected with a luciferase reporter gene which contains the RA receptor response element fused to a firefly luciferase gene (PGL3-RARE-Luciferase, Addgene). Eight testes from the P1.5 control or *Arid4b*SCKO mice were subjected to freeze/thaw and minced finely in phenol red-free DMEM (Life Technologies), and then centrifuged at 12,000 g for 10 min at 4°C. The supernatant was added to the transfected HeLa cells grown in 24-well plate and incubated for 24 h at 37°C. To perform luciferase reporter assay, the cells were washed twice with PBS and lysed using 100 µl of 1× Passive Lysis Buffer (Promega). After adding 100 µl firefly luciferase assay substrate (Promega) to the lysate, the luciferase activity was measured by the Berthold luminometer. Each sample was assayed in quadruplicate.

## Statistical Analysis

Means were calculated from at least three independent experiments. All results were shown as the means  $\pm$  standard errors of the means (SEM). Two-tailed unpaired Student's *t*-test was used to compare two groups. *P* values less than 0.05 were considered to be statistically significant.

## REFERENCES

1. Rebourcet D, O'Shaughnessy PJ, Monteiro A et al. Sertoli cells maintain Leydig cell number and peritubular myoid cell activity in the adult mouse testis. **PloS one**. 2014;9:e105687.
2. Rebourcet D, O'Shaughnessy PJ, Pitetti JL et al. Sertoli cells control peritubular myoid cell fate and support adult Leydig cell development in the prepubertal testis. **Development**. 2014;141:2139-2149.
3. Wu RC, Zeng Y, Pan IW et al. Androgen Receptor Coactivator ARID4B Is Required for the Function of Sertoli Cells in Spermatogenesis. **Mol Endocrinol**. 2015;29:1334-1346.
4. MacLean G, Li H, Metzger D et al. Apoptotic extinction of germ cells in testes of Cyp26b1 knockout mice. **Endocrinology**. 2007;148:4560-4567.



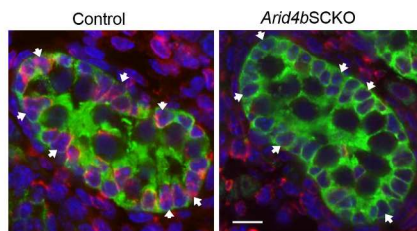

**Supporting Information Fig. S1.** Ablation of ARID4B in Sertoli cells of the *Arid4bSCKO* testes at E18.5. Immunofluorescent analysis of ARID4B protein (red, nuclear) co-stained with AMH (green, cytoplasmic) were performed in the control and *Arid4bSCKO* testes at E18.5. Nuclear DNA was stained by DAPI (blue). Arrows indicate Sertoli cells. Scale bar = 5 $\mu$ m.

190x254mm (300 x 300 DPI)

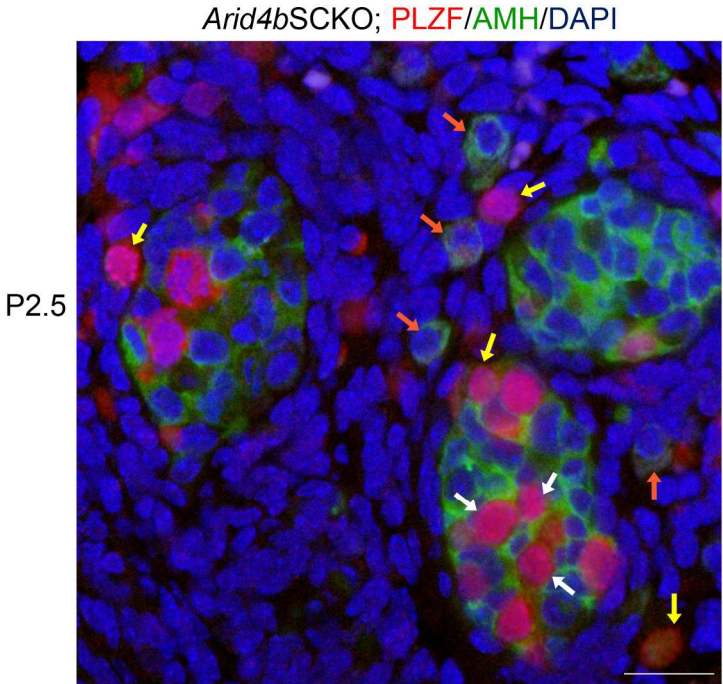

**Supporting Information Fig. S2.** Defect in gonocyte homing in the *Arid4b*SCKO testes at P2.5. Double immunofluorescent staining of AMH (green, cytoplasmic) and PLZF (red, nuclear) detected Sertoli cells and gonocytes, respectively, in the *Arid4b*SCKO testes at P2.5. Nuclear DNA was stained by DAPI (blue). Yellow arrows point to gonocytes escaping from the seminiferous cords, white arrows point to gonocytes that remained at central location within the cords, and orange arrows point to Sertoli cells that broke away from the seminiferous cords in the *Arid4b*SCKO testes at P2.5. Scale bar = 20mm.

190x254mm (300 x 300 DPI)

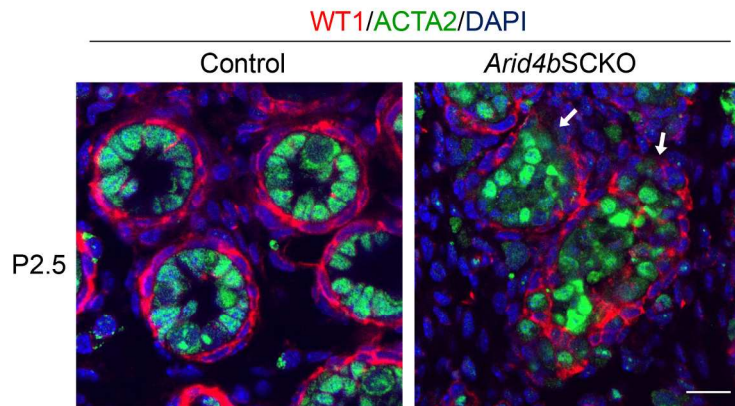

**Supporting Information Fig. S3.** Loss of integrity of the basement membrane in the *Arid4b*SCKO seminiferous tubules at P2.5. Double immunofluorescent staining of ACTA2 (red, cytoplasmic) and WT1 (green, nuclear) to detect peritubular myoid cells and Sertoli cells, respectively. Testis sections were from the control and *Arid4b*SCKO mice at P2.5. Nuclear DNA was stained by DAPI (blue). White arrows point to the seminiferous cords with loss of integrity in the basement membrane in the *Arid4b*SCKO testes at P2.5. Scale bar = 25 $\mu$ m.

190x254mm (300 x 300 DPI)

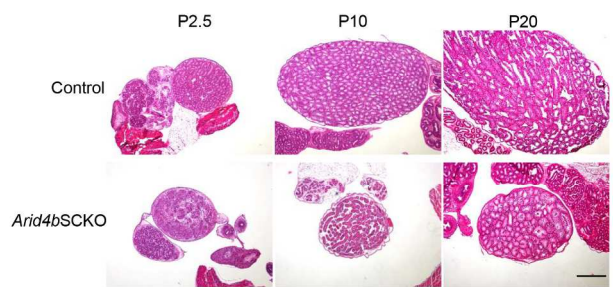

**Supporting Information Fig. S4.** The *Arid4b*SCKO testes were smaller at P10 and P20. The *Arid4b*SCKO testes were barely increased from P2.5 to P20, although a comparable size of testes in the control and *Arid4b*SCKO mice were found at P2.5. HE stained testis sections were from the *Arid4b*SCKO mice and their control littermates at P2.5, P10, and P20. Original magnification of images was 40x. Scale bars = 500mm.

190x254mm (300 x 300 DPI)

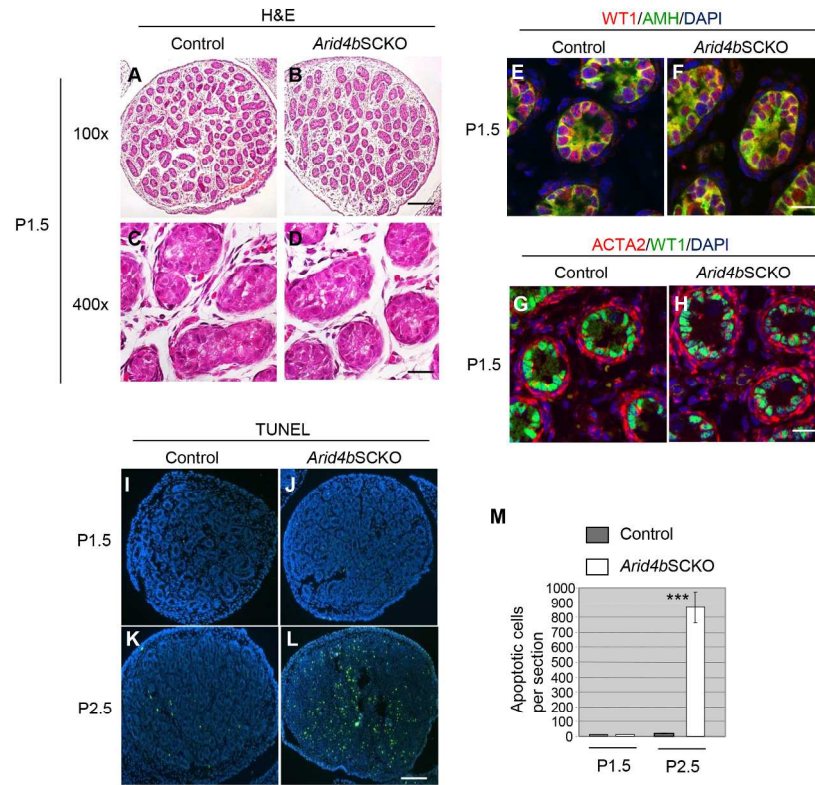

**Supporting Information Fig. S5.** Normal Sertoli cell distribution in seminiferous cords of the *Arid4bSCKO* testes at P2.5. **(A-D)**: Histological analyses of the control and *Arid4bSCKO* testes at P1.5. Paraffin-embedded testis sections were stained with hematoxylin and eosin (H&E). Original magnifications of images were 100x (A, B) and 400x (C, D). Scale bars = 100 $\mu$ m (B) and 25 $\mu$ m (D). **(E, F)**: Double immunofluorescent staining of AMH (green, cytoplasmic) and WT1 (red, nuclear) to detect Sertoli cells in testis sections from the *Arid4bSCKO* and control mice at P1.5. DNA was stained by DAPI (blue). Scale bar = 25 $\mu$ m. **(G, H)**: Double immunofluorescent staining of ACTA2 (red, cytoplasmic) and WT1 (green, nuclear) to detect peritubular myoid cells and Sertoli cells, respectively. Testis sections were from the control and *Arid4bSCKO* mice at P1.5. Nuclear DNA was stained by DAPI (blue). Scale bar = 25 $\mu$ m. **(I-L)**: Detection of apoptosis by TUNEL assay in testis sections from the control and *Arid4bSCKO* mice at P1.5 and P2.5. Apoptotic cells were TUNEL-positive (green). Nuclear DNA was stained by DAPI (blue). Scale bars = 100 $\mu$ m. **(M)**: Quantification of apoptotic cells in the control and *Arid4bSCKO* testes at P1.5 and P2.5. Three mice from each genotype and different litters were analyzed. Data are means  $\pm$  SEM. \*\*\*  $P < 0.001$

190x254mm (300 x 300 DPI)

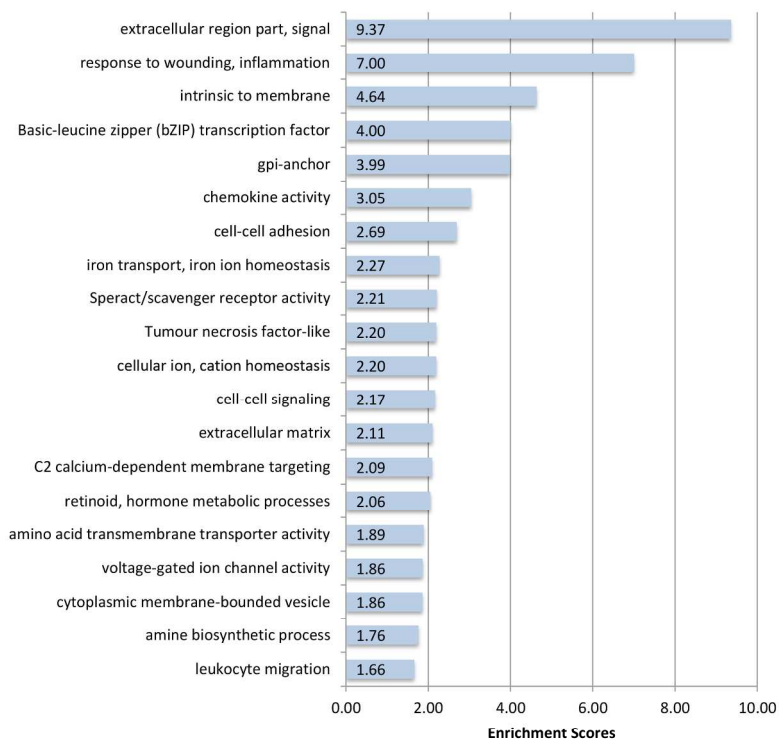

**Supporting Information Fig. S6.** Top 20 annotation clusters of genes in response to Sertoli cell-specific *Arid4b* knockout in testes were analyzed to identify enriched biological themes using the functional annotation clustering tool at Database for Annotation, Visualization, and Integrated Discovery Bioinformatics Resources (DAVID) v6.7.

190x254mm (300 x 300 DPI)

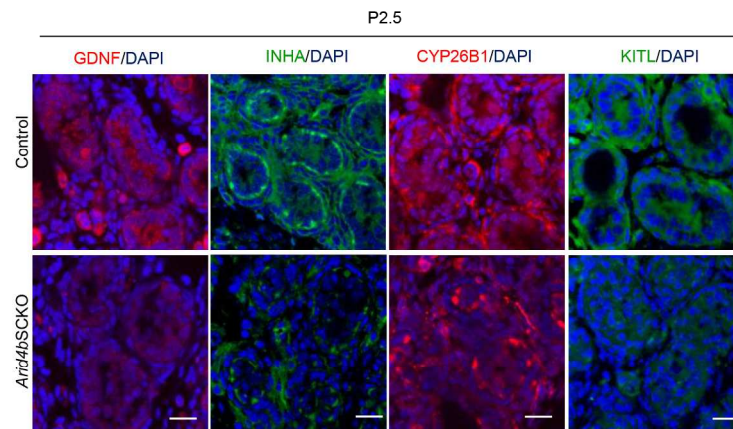

**Supporting Information Fig. S7.** GDNF, INHA, CYP26B1, and KITL were decreased in the *Arid4b*SCKO testes at P2.5. These proteins in the control and *Arid4b*SCKO testes at P2.5 were detected by immunofluorescent staining. Scale bar = 25 $\mu$ m. DNA was stained by DAPI (blue).

190x254mm (300 x 300 DPI)

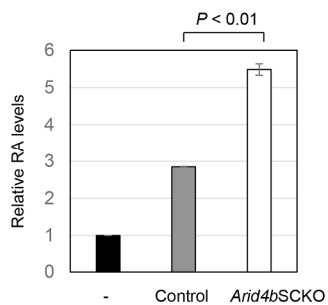

**Supporting Information Fig. S8.** Elevated RA levels in the P1.5 *Arid4bSCKO* testes. Cells transfected with the RA response element (RARE)-luciferase reporter were incubated with extracts prepared from eight control or eight *Arid4bSCKO* testes for 24 hours. Luciferase activity produced was used as a method to determine the RA levels of the samples. The results were plotted as relative RA levels of the treated samples vs. the non-treated samples. Each sample was assayed in quadruplicate. Data are means  $\pm$  SEM.

190x254mm (300 x 300 DPI)



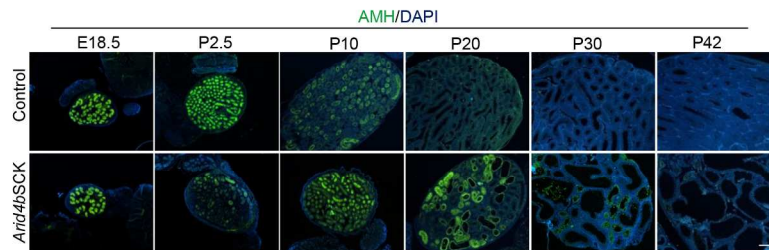

**Supporting Information Fig. S9.** Levels of AMH protein in Sertoli cells from the control and *Arid4bSCKO* testes at E18.5, P2.5, P10, P20, P30, and P42 were detected by immunofluorescent staining (green, cytoplasmic). Scale bar = 350mm. DNA was stained by DAPI (blue).

190x254mm (300 x 300 DPI)

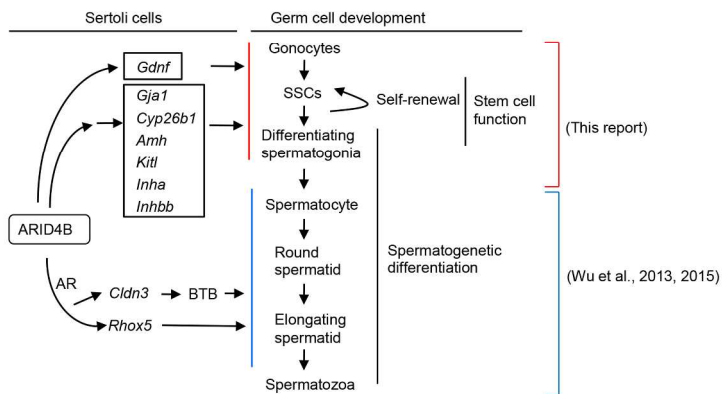

**Supporting Information Fig. S10.** ARID4B in Sertoli cells regulates germ cell development. ARID4B mediates the establishment of SSC niche by Sertoli cells to control SSC formation, self-renewal, and differentiation. In addition, ARID4B, as an AR coactivator, is involved in regulation of spermatogenic differentiation from undifferentiated spermatogonia through spermatogenic differentiation.

Wu Graphical Abstract

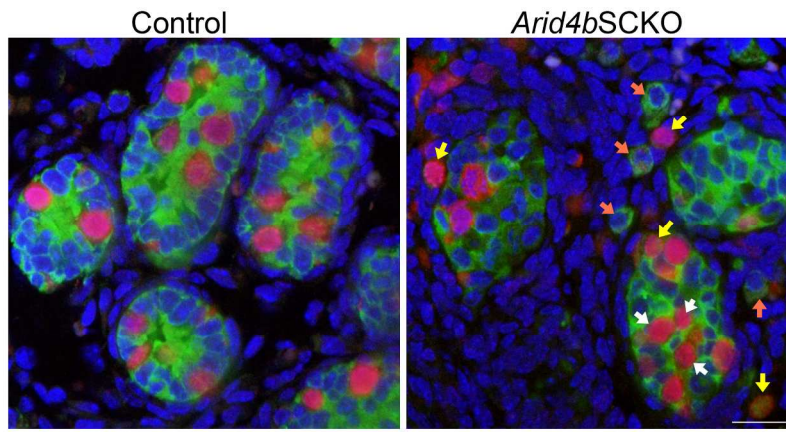

190x254mm (300 x 300 DPI)

**Supporting Information Table S1.** Upregulation or downregulation genes ( $P$ -value  $< 0.05$ ,  $|\text{Log}_2$ 

| gene               | mrna                     | refseq                                              | ucscid | description | entrez | chr   | beg        |
|--------------------|--------------------------|-----------------------------------------------------|--------|-------------|--------|-------|------------|
| Aqp12              | 587;NM_00587;NM_00cdc.2; | uc007musculus aquaporin 12 (Aqp12)                  |        |             |        | chr1  | 93006333   |
| Psg23              | NM_020261;NM_020261;     | uc009fjo.1 nancy-specific glycoprotein              |        |             | 56868  | chr7  | 18606342   |
| Gm5868             | NM_0010241;NM_0010241;   | uc008xrq.1; predicted gene 5868 (Gn                 |        |             | 545758 | chr5  | 72581638   |
| Asic4              | NM_183022;NM_183022;     | uc007bpg.1oton-gated) ion channel f                 |        |             | 241118 | chr1  | 75450509   |
| Gfy                | NM_0011952;NM_0011952;   | uc012fkd.1ociated olfactory signaling               |        |             | 1E+08  | chr7  | 45176348   |
| Ifitm7             | NM_0012707;NM_0012707;   | uc007ygs.2 induced transmembrane                    |        |             | 74482  | chr16 | 13981701   |
| AF529169           | NM_153509;NM_153509;     | uc009qzn.2NA sequence AF529169 (A                   |        |             | 209743 | chr9  | 89590034   |
| Elovl2             | NM_019423;NM_019423;     | uc007qfb.2ain fatty acids (FEN1/Elo2                |        |             | 54326  | chr13 | 41182381   |
| Slc13a2            | NM_022411;NM_022411;     | uc007kjf.1 im-dependent dicarboxylate               |        |             | 20500  | chr11 | 78397275   |
| AK189100           | AK189100                 | uc029rrd.1ence:ENSEMBL:Mouse-Transcript-EN          |        |             |        | chr12 | 17791611   |
| 1110032F0M_0011679 | NM_0011679               | uc012cqj.1 DNA 1110032F04 gene (1                   |        |             | 68725  | chr3  | 68869585   |
| AK185421           | AK185421                 | uc009jvu.1 ngth enriched library, clor              |        |             | 1E+08  | chr7  | 1.28E+08   |
| BC049966           | BC049966                 | uc008agy.1;uc008n BLAT search;Mus musculus activati |        |             |        | chr17 | 13699;6356 |
| Otop2              | 72801;AB0;NM_172801;     | uc007musculus otopenin 2 (Otop2                     |        |             | 237987 | chr11 | 17162;1153 |
| Cabp1              | NM_013879;NM_013879;     | uc008zdh.1calcium binding protein 1                 |        |             | 29867  | chr5  | 1.15E+08   |
| 4933417O1NR_045842 | NR_045842                | uc029wqb.133417O13 gene (4933417O13Rik), lor        |        |             |        | chr7  | 1.43E+08   |
| Trim60             | 2331;NM_1;NM_153097;     | uc033artite motif-containing 60 (Trim60), i         |        |             |        | chr8  | 10194;6499 |
| Gsdmc2             | 168274;NM168274;NM1;     | uc007musculus gasdermin C2 (Gs                      |        |             | 331063 | chr15 | 63824345   |
| AK140147           | AK140147                 | uc008uaf.1 ngth enriched library, clone: B230314    |        |             |        | chr4  | 1.08E+08   |
| Nipal1             | 1081205;BC1_0010812;     | uc007PA-like domain containing 1 (Nipal1),          |        |             |        | chr5  | 72647795   |
| Frem3              | NM_0011678;NM_0011678;   | uc012ggm.1ited extracellular matrix p               |        |             | 333315 | chr8  | 80611038   |
| Il17f              | 1977;NM_1;NM_145859;     | uc007culus interleukin 17F (Il17f), mRNA            |        |             |        | chr1  | 20777145   |
| Spint3             | NM_0011774;NM_0011774;   | uc008nfv.2eptidase inhibitor, Kunitz                |        |             | 629747 | chr2  | 1.65E+08   |
| Nkx2-1             | 385;NM_00385;NM_00;      | uc007isculus NK2 homeobox 1 (                       |        |             | 21869  | chr12 | 56531934   |
| 1700003F1NM_029309 | NM_029309                | uc008njj.1 DNA 1700003F12 gene (1                   |        |             | 75480  | chr2  | 1.55E+08   |
| Defb1              | NM_007843;NM_007843;     | uc009lby.2 ulus defensin beta 1 (Defl               |        |             | 13214  | chr8  | 21776554   |
| D7Ert143NR_029645  | NR_029645                | uc012ewd.1ERATO Doi 143, expressed (D7Ert143        |        |             |        | chr7  | 3218783    |
| AK028422           | AK028422                 | uc007nhz.1 gth enriched library, clone: 5430401H    |        |             |        | chr12 | 32113668   |
| Ppp1r42            | AK015164;AK015164;       | uc007ahd.1phosphatase 1, regulatory subunit 42      |        |             |        | chr1  | 18625;9995 |
| Slc38a3            | 1155;NM_0;NM_001199;     | uc009lute carrier family 38, me                     |        |             | 76257  | chr9  | 1.08E+08   |
| Saa2               | NM_011314;NM_011314;     | uc009gzb.2ilus serum amyloid A 2 (Sae               |        |             | 20209  | chr7  | 46751832   |
| AK054515           | AK054515                 | uc007peo.1full-length enriched library, clone: E33  |        |             |        | chr12 | 1.12E+08   |
| Hamp2              | NM_183257;NM_183257;     | uc009ghd.2idin antimicrobial peptide                |        |             | 66438  | chr7  | 30922371   |
| Ms4a15             | 172006;NM_0010348;       | uc012bis.1ing 4-domains, subfamily A, member        |        |             |        | chr19 | 10978306   |
| Gldn               | NM_17735(NM_17735);      | uc009pqx.1usculus gliomedin (Gldn),                 |        |             | 235379 | chr9  | 54286485   |
| Etd                | NR_034074                | uc009tfc.1 c testis differentiation (Etd), long nor |        |             |        | chrX  | 53434917   |
| Rhox8              | NM_0010041;NM_0010041;   | uc009szi.1 eproductive homeobox 8                   |        |             | 434768 | chrX  | 37874775   |
| AK145481           | AK145481                 | uc009kyw.1 gth enriched library, clone: 11C0003A1   |        |             |        | chr8  | 13998939   |
| Ccdc121            | NM_20728(NM_20728);      | uc011wxt.1l-coil domain containing 1                |        |             | 403180 | chr1  | 1.82E+08   |
| Odf3l1             | 1219;NM_1;NM_198673;     | uc009ense fiber of sperm tails 3                    |        |             | 382075 | chr9  | 56848658   |
| Ctrb1              | NM_025583;NM_025583;     | uc009nms.2s chymotrypsinogen B1 (C                  |        |             | 66473  | chr8  | 1.12E+08   |
| Klkb1              | 008455;M5;NM_008455;     | uc009s kallikrein B, plasma 1 (K                    |        |             | 16621  | chr8  | 45269450   |
| Wee2               | NM_20137(NM_20137);      | uc009bmq.1EE1 homolog 2 (S. pombe                   |        |             | 381759 | chr6  | 40442862   |
| Slamf1             | 1792;NM_0;NM_01373;      | uc009ytic activation molecule f                     |        |             | 27218  | chr1  | 1.72E+08   |

|            |                                 |                                         |                                           |       |                      |
|------------|---------------------------------|-----------------------------------------|-------------------------------------------|-------|----------------------|
| Zp1        | NM_00958(NM_00958)uc008grh.2    | ona pellucida glycoprotein              | 22786                                     | chr19 | 10914295             |
| Hs6st3     | NM_01582(NM_01582)uc007uzn.2    | sulfate 6-O-sulfotransferase            | 50787                                     | chr14 | 1.19E+08             |
| AK035994   | AK035994                        | uc008pki.1                              | gth enriched library, clone:9630025H      | chr3  | 64949222             |
| 4933433C11 | 28961;BC0(NM_028963)iqp.2;      | uc008DNA 4933433C11 gene (4933433C11)   |                                           | chr2  | 25212558             |
| Anks4b     | NM_02808(NM_02808)uc009jnj.2    | sterile alpha motif domain              | 72074                                     | chr7  | 1.2E+08              |
| Miox       | NM_01997(NM_01997)uc007xgc.1    | myo-inositol oxygenase                  | 56727                                     | chr15 | 89334472             |
| Gmnc       | N_0012859(N_0012859)uc007yvk.2  | minin coiled-coil domain                | 239789                                    | chr16 | 26957234             |
| AK048032   | AK048032                        | uc009tvj.1                              | gth enriched library, clone:C130031C      | chrX  | 99409570             |
| Gpr37l1    | NM_13443(NM_13443)uc007csv.2    | in-coupled receptor 37-like             | 171469                                    | chr1  | 1.35E+08             |
| AK085768   | AK085768                        | uc008mqp.1                              | gth enriched library, clone:D830006E      | chr2  | 1.44E+08             |
| Rph3a      | N_11286;BC0(NM_011286)zim.1;    | uc008sculus rabphilin 3A (Rph3a)        | 19894                                     | chr5  | 1.21E+08             |
| Rtn4r      | NM_02298(NM_02298)uc007ymv.1    | reticulon 4 receptor (Rtn4r)            | 65079                                     | chr16 | 18127705             |
| Sfrp4      | N_16687;AK0(NM_016687)pph.2;    | uc008eted frizzled-related protein      | 20379                                     | chr13 | 19623174             |
| Mafa       | NM_19435(NM_19435)uc007whe.1    | fibrosarcoma oncogene                   | 378435                                    | chr15 | 75746842             |
| Txk        | N_013698;N_1598;NM_0013698      | uc008xrz.2;                             | usculus TXK tyrosine kinase (Txk)         | chr5  | 13779;72691          |
| Dnaaf1     | NM_02664(NM_02664)uc009npw.1    | axonemal assembly factor                | 68270                                     | chr8  | 1.2E+08              |
| Pla2g4d    | N_0010241(N_0010241)uc008lvh.1  | spholipase A2, group IVC                | 78390                                     | chr2  | 1.2E+08              |
| Tgm6       | N_289749;NM_289749;NM_289749    | uc018sculus transglutaminase 6 (Tgm6)   |                                           | chr2  | 13274;13011          |
| Kazald1    | N_1095;NM_1095;NM_17892         | uc008hqs.2;                             | uc008erine peptidase inhibitor            | chr19 | 15240;45071          |
| Tmem28     | N_0010812(N_0010812)uc009tvn.1  | inmembrane protein 28 (Tmem28)          | 620592                                    | chrX  | 99821068             |
| Hsd17b1    | NM_01047(NM_01047)uc007lnb.1    | eroid (17-beta) dehydrogenase           | 15485                                     | chr11 | 1.01E+08             |
| Ubash3a    | N_77823;BC0(NM_177823)bur.2;    | uc008ciated and SH3 domain containing   | 328795                                    | chr17 | 31208065             |
| Calcr      | NM_001042588;NM_001042588       | uc009avf.1                              | usculus calcitonin receptor               | chr6  | 3685719              |
| Kcnh1      | N_038607;NM_038607;NM_038607    | uc008gated channel, subfamily I         | 16510                                     | chr1  | 1.92E+08             |
| AK198029   | AK198029                        | uc029qtf.1                              | ence:ENSEMBL:Mouse-Transcript-EN          | chr1  | 1.31E+08             |
| Aass       | NM_01393(NM_01393)uc009bbc.2    | adipate-semialdehyde synthase           | 30956                                     | chr6  | 23072172             |
| Gcm2       | NM_00810(NM_00810)uc007qey.1    | s missing homolog 2 (Drosophila) (Gcm2) |                                           | chr13 | 41101426             |
| Bcl11b     | N_00107988;N_00107988           | uc007ozh.1                              | B cell leukemia/lymphoma                  | chr12 | 1.08E+08             |
| 9630001P10 | AK044526;NM_044526;NM_044526    | uc008xjc.2;                             | 30001P10 gene (9630001P10Rik), long       | chr5  | 19274;45631          |
| Pvalb      | N_1986;NM_01364                 | uc007sculus parvalbumin (Pvalb)         | 19293                                     | chr15 | 78191117             |
| Gm826      | N_0010334(N_0010334)uc008nqv.1  | s predicted gene 826 (Gm826)            | 329554                                    | chr2  | 1.6E+08              |
| Emilin3    | N_82840;BC0(NM_182840)nrl.1;    | uc008elastin microfibril interfac       |                                           | chr2  | 16437;16091          |
| Fgf18      | N_2395;NM_00800                 | uc008ikc.2;                             | uc008us fibroblast growth factor          | chr11 | 33116977             |
| Flt3       | NM_01022(NM_01022)uc009aob.2    | FMS-like tyrosine kinase                | 14255                                     | chr5  | 1.47E+08             |
| Ankrd63    | N_0010819(N_0010819)uc008lsh.1  | kyrin repeat domain 63 (Ankrd63)        | 383787                                    | chr2  | 1.19E+08             |
| AK029949   | AK029949                        | uc009sig.2;                             | uc008male testis cDNA, RIKEN full-length  | chr4  | 156350_ran213;425524 |
| Fgf22      | N_1054;NM_02330                 | uc008fzp.1;                             | uc008ibroblast growth factor 22           | chr10 | 79755118             |
| Anks1b     | N_1;NM_0011001177397            | uc033frw.1;                             | and sterile alpha motif domain containing | chr10 | 189873508;           |
| AK042124   | AK042124                        | uc008yms.1                              | gth enriched library, clone:A630060I      | chr5  | 1.08E+08             |
| Svs6       | NM_01367(NM_01367)uc008nuh.1    | inal vesicle secretory protein          | 20945                                     | chr2  | 1.64E+08             |
| Sptlc3     | N_75467;AK0(NM_175467)nje.1;    | uc008yltransferase, long chain          | 228677                                    | chr2  | 13919;13941          |
| Gm6792     | N_189;NM_001011774              | uc033iwl.1;                             | uc033ulus predicted gene 6792             | chr7  | 6252709              |
| AK053246   | AK053246                        | uc007cit.1                              | th enriched library, clone:E030050D1      | chr1  | 1.2E+08              |
| Tfap2b     | NM_001025(NM_009334)uc007akq.2; | transcription factor AP-2 beta (Tfap2b) |                                           | chr1  | 19213926;            |
| 4933411G11 | NM_17788(NM_17788)uc009ajr.1    | NA 4933411G11Rik gene (4933411G11)      | 330228                                    | chr5  | 1.43E+08             |
| Kctd19     | N_77791;BC0(NM_177791)ncy.1;    | uc008hel tetramerisation domain         | 279499                                    | chr8  | 1.05E+08             |
| Fcrl1      | N_178165;M_178165               | uc008psb.2                              | usculus Fc receptor-like 1                | chr3  | 87376386             |

|           |                                                                             |                                                 |       |            |
|-----------|-----------------------------------------------------------------------------|-------------------------------------------------|-------|------------|
| AK085652  | AK085652                                                                    | uc009qtf.1;th enriched library, clone:D630050M  | chr9  | 77046681   |
| Fezf2     | U080433;BC00NM_080433;7sfs.2;uc000's Fez family zinc finger 2 (Fezf2), mRNA |                                                 | chr14 | 12341891   |
| AK015607  | AK015607                                                                    | uc007uyg.1;riched library, clone:1700085D13 prc | chr14 | 1.15E+08   |
| Cga       | NM_009888;NM_009888;uc008sgq.1;protein hormones, alpha                      | 12640                                           | chr4  | 34893778   |
| Erich5    | NM_173421;NM_173421;uc007vls.2;plus glutamate rich 5 (Eric                  | 239368                                          | chr15 | 34453311   |
| AK177772  | AK177772                                                                    | uc009cdd.1h enriched library, clone:5730409F18  | chr6  | 58831888   |
| Gsdmcl-ps | NR_029414                                                                   | uc007vzd.1; C-like, pseudogene (Gsdmcl-ps), non | chr15 | 63914460   |
| Kcne1     | U5;X60457;NM_008424;uc007zza.1;ited channel, Isk-related s                  | 16509                                           | chr16 | 18564;9234 |
| Alpl2     | NM_007433;NM_007433;uc007bvy.1e phosphatase, placental-                     | 11650                                           | chr1  | 87086690   |
| A530065N  | NR_046142                                                                   | uc029sbo.130046M15 gene (A530065N20Rik), lo     | chr13 | 60029710   |
| Onecut3   | NM_139226;NM_139226;uc007gdn.1;t domain, family membe                       | 246086                                          | chr10 | 80494905   |
| AK019773  | AK019773                                                                    | uc009nhj.1; enriched library, clone:4930517G24  | chr8  | 1.07E+08   |
| Slc13a2os | NR_003282                                                                   | uc007kje.1;arboxylate transporter), member 2, c | chr11 | 78394484   |
| Ptprh     | NM_207277;NM_207277;uc009exz.1osine phosphatase, recep                      | 545902                                          | chr7  | 4548613    |
| Trpc3     | U714;AK082;NM_019513;ozt.2;uc000;tential cation channel, subfamily C, n     |                                                 | chr3  | 36620481;  |
| Csrnp3    | U1688;NM_018634;NM_03jwq.2;uc000;teine-serine-rich nuclear protein 3 (C     |                                                 | chr2  | 65845766;  |
| Klk1      | NM_010639;NM_010639;uc009goo.1;usculus kallikrein 1 (Klk1),                 | 16612                                           | chr7  | 44225436   |
| Grm5      | U1113;AK13;3834;NM_09ifr.2;uc000;utamate receptor, metabotropic 5 (G        |                                                 | chr7  | 6510;8758  |
| Prmt3     | U;AK045491;00128970;uc009dgr.2oline-rich transmembrane protein 3 (          |                                                 | chr6  | 6299;1134  |
| Grin2c    | U10350;BC1;NM_01035;yhk.1;uc000;eptor, ionotropic, NMDA2                    | 14813                                           | chr11 | 1.15E+08   |
| Amh       | NM_007445;NM_007445;uc007get.1;s anti-Mullerian hormone                     | 11705                                           | chr10 | 80805247   |
| Ky        | NM_024291;NM_024291;uc009rfp.1;s kyphoscoliosis peptidas                    | 16716                                           | chr9  | 1.03E+08   |
| 4921507P0 | NM_027564;NM_027564;uc009bxf.1DNA 4921507P07 gene (4                        | 70821                                           | chr6  | 50573303   |
| Slc6a2    | NM_009209;NM_009209;uc009muh.2;otransmitter transporter,                    | 20538                                           | chr8  | 92961046   |
| AK045688  | AK045688                                                                    | uc007wxx.1length enriched library, clone:B23030 | chr15 | 81800790   |
| Fcgbp     | U0011226;U0011226;uc009fxt.2;agment of IgG binding protein (Fcgbp           |                                                 | chr7  | 28071235;  |
| AK142999  | AK142999                                                                    | uc007agf.1;CURSOR (COAT POLYPROTEIN) [CON       | chr1  | 7375887    |
| Lect1     | U10701;AK0;NM_010701;utg.2;uc010;ocyte cell derived chemota                 | 16840                                           | chr14 | 79637689   |
| Them5     | U517;NM_0;NM_02541;qfv.2;uc000;terase superfamily memb                      | 66198                                           | chr3  | 3254;9434; |
| Ido1      | NM_008324;NM_008324;uc009lfa.1;oleamine 2,3-dioxygenas                      | 15930                                           | chr8  | 24584140   |
| Gucy2f    | U46;NM_00;U0010075;ulq.2;uc033;is guanylate cyclase 2f (Gucy2f), mRNA       |                                                 | chrX  | 9288;1420; |
| Hpcal4    | NM_174998;NM_174998;uc008uox.1;us hippocalcin-like 4 (Hpc                   | 170638                                          | chr4  | 1.23E+08   |
| Edar      | NM_01010;NM_01010;uc007fdh.2;ectodysplasin-A receptor                       | 13608                                           | chr10 | 58600787   |
| Nol4      | U199024;A1024;NM_00;uc008efo.2;usculus nucleolar protein                    | 319211                                          | chr18 | 22693154   |
| Cbln1     | NM_019626;NM_019626;uc009mqr.1;rebellin 1 precursor prote                   | 12404                                           | chr8  | 87468852   |
| Mylk3     | U1;AK16521;NM_175441;uc009mpt.1;nyosin light chain kinase 3                 | 213435                                          | chr8  | 7052;8532; |
| Dnmt3l    | U284197;NM;284197;NM;fxh.2;uc000;cytosine-5-)-methyltransf                  | 54427                                           | chr10 | 2286;7804; |
| Grem2     | U5545;NM;NM_011823;foe.1;uc000; cysteine knot superfamil                    | 23893                                           | chr1  | 6774;1748; |
| Kcnh5     | NM_172805;NM_172805;uc007nwz.2d channel, subfamily H (e                     | 238271                                          | chr12 | 74897216   |
| Galnt14   | U27864;AK0;NM_027864;dnl.2;uc000;mine:polypeptide N-acety                   | 71685                                           | chr17 | 2783;7349; |
| Gm13544   | NR_040365                                                                   | uc008jsq.1;d gene 13544 (Gm13544), long non-c   | chr2  | 58276778   |
| Grk1      | NM_011881;NM_011881;uc009kxw.2;tein-coupled receptor kir                    | 24013                                           | chr8  | 13405080   |
| Serpina5  | NM_172953;NM_172953;uc007ows.1) peptidase inhibitor, clad                   | 268591                                          | chr12 | 1.04E+08   |
| Hhip      | NM_020255;NM_020255;uc009mix.2;edgehog-interacting prote                    | 15245                                           | chr8  | 79965850   |
| Fam57b    | U20734;NM;?;NM_02999;jsx.1;uc000;with sequence similarity 5                 | 68952                                           | chr7  | 2682;1268; |
| Cbln2     | U72633;BC0;NM_172633;fvc.1;uc000;rebellin 2 precursor prote                 | 12405                                           | chr18 | 1109;8671; |
| Rbfox1    | U021477;BC;3188;NM;abb.1;uc007ing protein, fox-1 homolog (C. elegan         |                                                 | chr16 | 4792;6173; |

|           |                                                                                |       |            |
|-----------|--------------------------------------------------------------------------------|-------|------------|
| Kcnt1     | 3;AK08611145403;NM_001145403.1;uc008ito.1;ssium channel, subfamily T, member 1 | chr2  | 3853;25908 |
| Pde6c     | 170959;NM_170959;NM_170959.1;uc008sterase 6C, cGMP specific,                   | chr19 | 38132780   |
| Klhdc7a   | NR_035519NM_173421uc008vmt.1lch domain containing 7A                           | chr4  | 1.4E+08    |
| Elavl4    | 598;DQ460598;NM_001145403.1;uc012hal, abnormal vision, Dros                    | chr4  | 3736;11021 |
| 170003002 | NR_045345 uc007hch.100030020 gene (1700030020Rik), lor                         | chr10 | 1.17E+08   |
| Slc6a11   | NM_17289(NM_17289uc009dhs.1eurotransmitter transport                           | chr6  | 1.14E+08   |
| St8sia1   | NM_01137(NM_01137uc009epv.1-neuraminide alpha-2,8-si                           | chr6  | 1.43E+08   |
| Gm11744   | 1163318;AKM_0011633nlx.2;uc007predicted gene 11744 (Gn                         | chr11 | 3533;11661 |
| Slc25a42  | 1007570;AKM_0010075!gex.1;uc00carrier family 25, member                        | chr8  | 70184339   |
| Kl        | 1088;NM_013823auk.2;uc00s musculus klotho (Kl), mF                             | chr5  | 1.51E+08   |
| Fer1l5    | 176;KC4409(NM_0012770uc007aqb.2 fer-1-like 5 (C. elegans) (Fer1l5), mRI        | chr1  | 36372290;  |
| AK016085  | AK016085 uc008jyx.1 enriched library, clone:4930550G17                         | chr2  | 69885727   |
| Ccl17     | NM_01133(NM_01133uc009mwz.2mokine (C-C motif) ligand                           | chr8  | 94810452   |
| Gsg1l     | (NM_0011014(NM_0011014 uc009jqp.2usculus GSG1-like (Gsg1l),                    | chr7  | 1.26E+08   |
| Ppp1r1b   | 8;AY640621(NM_144828uc007lfz.1;tase 1, regulatory (inhibitc                    | chr11 | 98349995;  |
| Hsd17b3   | NM_00829(NM_00829uc007qyf.1roid (17-beta) dehydroge                            | chr13 | 64058273   |
| Edn2      | NM_00790(NM_00790uc008unb.1sculus endothelin 2 (Edn2                           | chr4  | 1.2E+08    |
| AK008705  | AK008705 uc009mlp.1enriched library, clone:2210011C24 p                        | chr8  | 84010229   |
| Pipox     | NM_00895(NM_00895uc007kkm.2s pipecolic acid oxidase (F                         | chr11 | 77880614   |
| Arid4b    | ;NM_194268122;NM_194268122.1uc007pnb.1ch interactive domain 4B                 | chr13 | 14063783;  |
| Wdr95     | 309;NM_02944(NM_02944apv.1;uc009WD40 repeat domain 95 (                        | chr5  | 8678;1495; |
| Pla2g5    | 122954;NM_122954;NM_122954.2;uc008s phospholipase A2, gro                      | chr4  | 1.39E+08   |
| 4921513D1 | AK014877 uc008dqa.141086; SubName: Full=Pr                                     | chr17 | 79626676   |
| Ppp1r16b  | _153089;NM_153089;NM_153089.2;uc008nqo.2;hatase 1, regulatory (inhi            | chr2  | 6629;15861 |
| Lrrc66    | NM_15356(NM_15356uc008xta.1ine rich repeat containing                          | chr5  | 73606641   |
| Sgpp2     | (NM_0010041(NM_0010041uc007bqe.1sine-1-phosphate phosph                        | chr1  | 78310345   |
| Slc25a18  | (NM_0010810(NM_0010810uc009dnq.1ly 25 (mitochondrial carri                     | chr6  | 1.21E+08   |
| Ly6g6c    | 547;NM_023463(NM_023463cfl.1;uc008yte antigen 6 complex, loc                   | chr17 | 35067324   |
| Wfdc9     | (NM_0011604(NM_0011604uc008nvn.2 four-disulfide core doma                      | chr2  | 1.65E+08   |
| Srrm3     | NM_02140(NM_02140uc008zza.1e/arginine repetitive mati                          | chr5  | 6889;1358; |
| Ggps1     | NM_01028(NM_01028uc007pmv.1geranyl diphosphate synt                            | chr13 | 2444;14051 |
| Plp1      | (NM_011123;NM_011123uc012hpb.1s proteolipid protein (my                        | chrX  | 1070;1368; |
| Tmprss13  | (NM_0010133(NM_0010133 uc009pfr.1embrane protease, serine                      | chr9  | 45319099   |
| Fam198a   | K134876;NM_1743;NM_1743.1uc012hcv.1th sequence similarity 198, member          | chr9  | 0987;12191 |
| Sh3gl2    | NM_01953(NM_01953uc008tlo.1 SH3-domain GRB2-like 2 (                           | chr4  | 85205455   |
| Tbata     | 1017419;NM_1017419;NM_1017419.1uc007ffq.1ymus, brain and testes as             | chr10 | 61175261;  |
| Ankmy1    | 1700;NM_17285(NM_17285wpl.1;uc008at and MYND domain cor                        | chr1  | 92870128   |
| AK214512  | AK214512 uc009ize.1nce:ENSEMBL:Mouse-Transcript-ENS                            | chr7  | 1.06E+08   |
| Lrrc7     | 58;BC1384(NM_0010813uc012dac.1;cine rich repeat containing 7 (Lrrc7),          | chr3  | 1.58E+08   |
| Nlrp2     | NM_17769(NM_17769uc009fae.1mily, pyrin domain contai                           | chr7  | 5298546    |
| Sim2      | ;NM_01137(NM_01137uc008aae.1-minded homolog 2 (Dros                            | chr16 | 5259;9412; |
| AK198271  | AK198271 uc008ufz.1nce:ENSEMBL:Mouse-Transcript-ENS                            | chr4  | 1.16E+08   |
| Gm19689   | NR_045094 uc029tkw.1d gene, 19689 (Gm19689), long non-                         | chr17 | 83033591   |
| Fam46c    | 142952;CCM_0011429qqu.2;uc03. sequence similarity 46, member C (Fa             | chr3  | 1535;1004; |
| Hrasls    | 3482;NM_01375(NM_01375yvw.1;uc008is HRAS-like suppressor (H                    | chr16 | 9694;29211 |
| T         | NM_00930(NM_00930uc008ajq.1 musculus brachyury (T), n                          | chr17 | 8434422    |
| Slc17a1   | (NM_001170198;NM_001170198.2;uc007pvf.2;r family 17 (sodium phos               | chr13 | 9017;23871 |

|            |                               |                                                            |       |             |
|------------|-------------------------------|------------------------------------------------------------|-------|-------------|
| Enpep      | AK0107934;NM_007934           | rhz.1;uc009glutamyl aminopeptidase (Enpep), m              | chr3  | 18593;12921 |
| Atp12a     | NM_138652                     | NM_138652uc007ubw.2ansporting, nongastric, al              | chr14 | 56365067    |
| Nlrp9b     | NM_194058                     | NM_194058;uc009fnt.1nily, pyrin domain containing 9B (Nlrp | chr7  | ;20019109;  |
| Mmp25      | 1033339;AKM_0010333           | asq.1;uc01atrix metallopeptidase 25                        | chr17 | ;1005;2362! |
| Tef        | ;AK053229;3484;NM_0c007wxi.2; | lus thyrotroph embryonic                                   | chr15 | ;81802672;  |
| Cldn18     | 194921;NM194921;NM0           | rer.2;uc009 musculus claudin 18 (Cld                       | chr9  | 99690796    |
| AK019848   | AK019848                      | uc029shu.1n enriched library, clone:4931406H21             | chr14 | 25586546    |
| Dcstamp    | 1512;NM_029422                | NM_029422voj.2;uc007expressed seven transmembrane pro      | chr15 | 39745929    |
| Igdcc3     | 108988;BC010898               | NM_008988qcv.1;uc009n superfamily, DCC subcla              | chr9  | 65141188    |
| Tenm2      | 11856;AK011856                | NM_011856ilm.1;uc011neurin transmembrane protein 2 (Te     | chr11 | 16668;3614! |
| Slc1a6     | NM_009200                     | NM_009200uc007fyg.2affinity aspartate/glutamate            | chr10 | 78780495    |
| Icos       | NM_017480                     | NM_017480uc011wlz.2nducible T cell co-stimulat             | chr1  | 60977913    |
| Chp2       | NM_027363                     | NM_027363uc009jos.1 ineurin-like EF hand prote             | chr7  | 1.22E+08    |
| Hoxd1      | NM_010467                     | NM_010467uc008kei.1ulus homeobox D1 (Hoxd                  | chr2  | 74762979    |
| Cited1     | 276473;NM276473;NM0           | tyo.3;uc003nsactivator with Glu/Asp-                       | chrX  | 1.02E+08    |
| Akr1b7     | NM_009731                     | NM_009731uc009bhd.2) reductase family 1, mem               | chr6  | 34412361    |
| Slc25a45   | 4;AK133879                    | NM_134154uc008gfr.1;carrier family 25, member              | chr19 | '8465;5877! |
| Prkcb      | 174;NM_008859                 | NM_008859jot.1;uc009s protein kinase C, beta (f            | chr7  | 1.22E+08    |
| Map2k6     | 943;X98067                    | NM_011943uc007mdt.1activated protein kinase kinase 6 (Ma   | chr11 | '9286;1103! |
| Faim2      | _00103865                     | 038658;NMuc007xpr.2as apoptotic inhibitory mc              | chr15 | .0119;9949' |
| Vsx2       | 107701;BC010770               | NM_007701ofm.1;uc00visual system homeobox 2                | chr12 | 84569851    |
| Gm9866     | NR_045868                     | NR_045868uc007nfm.2ulus predicted gene 9866 (Gm9866)       | chr12 | 27140795    |
| Pnmt       | NM_008890                     | NM_008890uc007lgg.1thanolamine-N-methyltra                 | chr11 | 98386631    |
| Fndc5      | NM_027402                     | NM_027402uc008uwe.1ctin type III domain conta              | chr4  | 1.29E+08    |
| Stamos     | NR_038162                     | uc008ikf.1;H3 domain and ITAM motif) 1, oppos              | chr2  | 14070332    |
| Doc2b      | NM_007873                     | NM_007873uc007kev.1ulus double C2, beta (Doc               | chr11 | 75769089    |
| Wdr72      | 1033500;BC10010335            | qre.1;uc009s WD repeat domain 72 (V                        | chr9  | 74110333    |
| Hydin      | AK142981;NM_172916            | uc009nkr.1nemal central pair apparatus protein             | chr8  | 1.1E+08     |
| Kcns2      | NM_0012717317;NM_00           | uc033gtl.1;oltage-gated channel, subfamily S, 2            | chr15 | ;34838048;  |
| Cphx2      | NM_175342                     | NM_175342uc007ssn.2mic polyadenylated home                 | chr14 | !1903;2608: |
| D430041D05 | 1047;AK0525                   | NM_0010333;uc008ljr.1;DNA D430041D05 gene (D430041D05      | chr2  | !3074;1041! |
| Svs5       | NM_009301                     | NM_009301uc008nui.1inal vesicle secretory prot             | chr2  | 1.64E+08    |
| Cuzd1      | NM_008411                     | NM_008411uc009kbc.1id zona pellucida-like dom              | chr7  | 1.31E+08    |
| CK137956   | NM_0011347                    | NM_0011347 uc012dln.1NA sequence CK137956 (C               | chr4  | 1.28E+08    |
| Plekhg4    | 1029859;NM10010813;           | uc009ncx.1ontaining, family G (with RhoGef don             | chr8  | 105375380   |
| Srgap3     | 8;AK051262                    | NM_080448uc009deh.1D Rho GTPase activating protein 3 (Sr   | chr6  | 112738882   |
| Ak8        | NM_0010338                    | NM_0010338 uc008izd.1ulus adenylate kinase 8 (A            | chr2  | 28700160    |
| Shisa2     | NM_145463                     | NM_145463uc007uer.2a homolog 2 (Xenopus lae                | chr14 | 59625280    |
| Cpn1       | 1629;NM_030703                | NM_030703hpb.1;uc009oxypeptidase N, polypeptide 1 (Cpn1)   | chr19 | !6307;4396: |
| Exoc3l2    | BC148721                      | uc009flz.1 Full=Putative uncharacteri                      | chr7  | 19489604    |
| Pdyn       | 863;NM_00863;NM_00            | mic.2;uc009musculus prodynorphin (f                        | chr2  | 1.3E+08     |
| Otogl      | NM_0011775                    | NM_0011775 uc011xnc.1sculus otogelin-like (Otogl           | chr10 | 1.08E+08    |
| Greb1      | 764;AK045764;NM_00            | rrb.1;uc007lated by estrogen in brea                       | chr12 | ;16670614;  |
| Myo7b      | NM_032394                     | NM_032394uc008eix.2;culus myosin VIIB (Myo7b               | chr18 | 31959233    |
| Dydc2      | NM_027717                     | NM_027717uc007tck.1 PY30 domain containing 2               | chr14 | 41049208    |
| Mylk2      | NM_0010810                    | NM_0010810 uc008ngs.2 polypeptide kinase 2, ske            | chr2  | 1.53E+08    |
| Rasl12     | ;AK087136;3158;NM_            | (uc012gvk.1sculus RAS-like, family 12 (Rasl12)             | chr9  | 65398487    |



|                         |                          |                                                     |        |       |              |
|-------------------------|--------------------------|-----------------------------------------------------|--------|-------|--------------|
| Acsm3                   | 12441;AK0:NM_212442      | 9jlt.1;uc005ynthetase medium-chain f                | 20216  | chr7  | '4512;11970  |
| Scrn2                   | VM_14602                 | VM_14602uc007ldk.2.usculus secernin 2 (Scrn2)       | 217140 | chr11 | 97029951     |
| Gm21284                 | NR_078345                | uc009cnu.2.d gene, 21284 (Gm21284), long non-       |        | chr6  | 83568038     |
| Ciita                   | 1;NM_0012_00124376       | 1uc007ydt.1.usculus class II transactivator (Ciita) |        | chr16 | ;10480071;   |
| AK047272                | AK047272                 | uc007msh.1gth enriched library, clone:              | 268515 | chr11 | 1.2E+08      |
| Perm1                   | VM_17241                 | VM_17241uc008wgm.1.d ESRR induced regulator         | 74183  | chr4  | 1.56E+08     |
| Tox                     | AK161718;NM_145711       | uc008rxt.1.ection-associated high mc                | 252838 | chr4  | );6687385;(  |
| AK144897                | AK144897                 | uc007ytv.1:h enriched library, clone:G730049K0      |        | chr16 | 23520318     |
| Oprl1                   | 541;NM_01012;NM_002      | uc008onj.culus opioid receptor-like                 | 18389  | chr2  | 181715347    |
| Alpk2                   | VM_0010372               | VM_0010372 uc008feu.3.culus alpha-kinase 2 (Alpk)   | 225638 | chr18 | 65265530     |
| Kcnj10                  | 039484;CCM_0010394       | 'dqj.1;uc03:-rectifying channel, subfamily J, mem   |        | chr1  | 1209;17230   |
| St18                    | _001244693_001244693     | uc007aga.1 suppression of tumoriger                 | 240690 | chr1  | 10050;6487;  |
| 493142911               | 24;NM_001VM_0010811      | pac.1;uc005DNA 4931429111 gene (4                   | 70989  | chr9  | 40894848     |
| Cln3                    | 146311;NM146311;NM9jsa.1 | uc009neural 3, juvenile (Batt                       | 12752  | chr7  | '8371;1265'  |
| Kcna3                   | VM_00841                 | VM_00841uc008qwp.2.d channel, shaker-related        | 16491  | chr3  | 1.07E+08     |
| Gja1                    | 17559;AY42NM_01028       | fcc.2;uc007ap junction protein, alpha 1 (Gja1), m   |        | chr10 | ;56377272;   |
| Scn1a                   | 33;AK0460(NM_01873       | ;uc008jxa.1.hannel, voltage-gated, type I, alpha (S |        | chr2  | '0781;6634'  |
| 4833423E2M_0010816      | VM_0010816               | uc008kkj.1 DNA 4833423E24 gene (4                   | 228151 | chr2  | 85484091     |
| Slc22a29                | 6;AF536195VM_17277       | uc008glu.1;carrier family 22. member                | 236293 | chr19 | 8160167      |
| TRAV7-6                 | AK050592                 | uc007tru.1.e: Full=TRAV7-6; Flags: Fragment         |        | chr14 | 53324631     |
| Kcnk9                   | VM_0010338               | VM_0010338uc007wbk.1n channel, subfamily K, m       | 223604 | chr15 | 72512118     |
| Enam                    | VM_01746                 | VM_01746uc008xzt.2 usculus enamel (Enam),           | 13801  | chr5  | 88487974     |
| Prss27                  | VM_17544                 | (VM_17544uc008aug.1)s protease, serine, 27 (Pr      | 213171 | chr17 | 24038242     |
| AK030561                | AK030561                 | uc008pic.1.ength enriched library, clone:533043     |        | chr3  | 58788406     |
| Uchl1os                 | NR_102714                | uc008xpe.1.al hydrolase L1, opposite strand (Ucl    |        | chr5  | 66626494     |
| 4930539MNR_040597       |                          | uc008oox.20539M17 gene (4930539M17Rik), lo          |        | chr3  | 9061963      |
| AK135813                | AK135813                 | uc007myz.1gth enriched library, clone:7420420P      |        | chr12 | 5808216      |
| Eef1a2                  | VM_00790                 | (VM_00790uc008olh.1 anslation elongation fact       | 13628  | chr2  | 1.81E+08     |
| Myh13                   | 1081250;AKM_0010812      | jmu.1;uc009avy polypeptide 13, skelet               | 544791 | chr11 | );4784;6732' |
| Acan                    | 1351;NM_0NM_00742        | 4hxw.1;uc009usculus aggrecan (Acan),                | 11595  | chr7  | 17751;7905:  |
| Rnf213                  | U76754                   | uc007mqo.1Uncharacterized protein; Flags: Fragn     |        | chr11 | 1.19E+08     |
| Slc22a3                 | VM_01139                 | VM_01139uc008aku.1 22 (organic cation transp        | 20519  | chr17 | 12419973     |
| 1700009P1M_0010812      | VM_0010812               | uc007dna.1DNA 1700009P17 gene (1                    | 75472  | chr1  | 1.71E+08     |
| Fam211b                 | VM_19886                 | (VM_19886uc029qyw.1equence similarity 211, m        | 192734 | chr10 | 75550124     |
| Zfyve28                 | 1015039;AKM_0010150      | xca.1;uc008ger, FYVE domain containi                | 231125 | chr5  | 1968;3419-   |
| P4ha3                   | VM_17716                 | 1VM_17716uc012fqc.1. 4-dioxygenase (proline 4-      | 320452 | chr7  | );5519;1002' |
| Cebpa                   | VM_00767                 | VM_00767uc009gjl.2 enhancer binding protein         | 12606  | chr7  | 35119292     |
| Gm5083                  | NR_045285                | uc007qgn.2ted gene 5083 (Gm5083), long non-cc       |        | chr13 | 44121166     |
| Cyp2j13                 | 3C016446;NM_14554        | ;uc008ttf.1;0, family 2, subfamily j, pc            | 230459 | chr4  | 96042659     |
| AK131873                | AK131873                 | uc008igm.1.ngth enriched library, clone:2010309     |        | chr2  | 6471993      |
| Pcdhb1                  | VM_05312                 | (VM_05312uc008epm.1.s protocadherin beta 1 (Pc      | 93872  | chr18 | 37264997     |
| Nt5c1a                  | VM_0010855               | VM_0010855uc008uoy.1-nucleotidase, cytosolic IA     | 230718 | chr4  | 1.23E+08     |
| Gm20735                 | NR_015497                | uc029wwq.1.d gene, 20735 (Gm20735), long non-       |        | chr8  | 1.22E+08     |
| Kif4-ps                 | NR_033653                | uc011yqh.1ly member 4, pseudogene (Kif4-ps), n      |        | chr12 | 1.01E+08     |
| Gm904                   | VM_0010337               | VM_0010337 uc007qld.1)s predicted gene 904 (Gn      | 380845 | chr13 | 50643227     |
| Nat3                    | 18674;CCDSVM_00867       | 4lvj.1;uc035s N-acetyltransferase 3 (Nat3), mRN     |        | chr8  | 13853;6754'  |
| A630010A(33556;AK139693 | uc012abk.1;uc0030010A05  | gene (A630010A05Rik), lor                           |        | chr16 | 12316;14580  |

|                   |                                |                                      |                                         |       |             |
|-------------------|--------------------------------|--------------------------------------|-----------------------------------------|-------|-------------|
| Olf2r283          | NM_147036;NM_147036;uc007xmi.1 | olfactory receptor 283 (O            | 259038                                  | chr15 | 98378178    |
| Mup5              | NM_008649;NM_008649;uc008tbq.1 | major urinary protein 5 (            | 17844                                   | chr4  | 61831318    |
| 4930578MNR_045991 | uc007xol.1;0578M01             | gene (4930578M01Rik), lo             |                                         | chr15 | 98985964    |
| Psg19             | _011964;X9;NM_011964           | fas.1;uc00nancy specific glycoprotei | 26439                                   | chr7  | 18789124    |
| Sycp1-ps1         | NR_024208                      | uc012far.1                           | plex protein 1, pseudogene 1 (Sycp1-    | chr7  | 18786301    |
| AK143961          | AK143961                       | uc007mds.1                           | nriched library, clone:F530007B04 pr    | chr11 | 1.1E+08     |
| Grin2b            | 59263;AK1;NM_008173            | elq.1;uc012eptor, ionotropic, NMDA2  | 14812                                   | chr6  | 9804;1360   |
| AK138941          | AK138941                       | uc008jcc.1                           | nriched library, clone:A530052B1!       | chr2  | 30713149    |
| AK008288          | AK008288                       | uc008elz.1                           | length enriched library, clone:2010005  | chr18 | 35182491    |
| Slc22a8           | NM_001164;NM_001164            | uc012bia.1                           | mily 22 (organic anion tra              | chr19 | 1253;8593   |
| Adamts16          | NM_172053;NM_172053            | uc011zbn.1                           | se (reprolysin type) with thrombospo    | chr13 | 14826;7072  |
| Spin2c            | 005370;CCM_0010053             | jux.1;uc009indlin family, member 2C  | 278240                                  | chrX  | 13192;1538  |
| Ajap1             | M_0010992;M_0010992            | uc008was.1                           | ns junction associated pr               | chr4  | 1.53E+08    |
| Grm3              | NM_18185;NM_18185              | uc008wll.1                           | mate receptor, metabotrc                | chr5  | 9485235     |
| Itpka             | NM_146125;NM_146125            | uc008luf.1                           | l 1,4,5-trisphosphate 3-ki              | chr2  | 1.2E+08     |
| Zfp467            | _00108541;085415;NM            | uc012eld.1                           | ulus zinc finger protein 467 (Zfp467)   | chr6  | 17691;4843  |
| Dll3              | NM_007866;NM_007866            | uc009fye.1                           | s delta-like 3 (Drosophila)             | chr7  | 28293554    |
| Cdc20b            | M_0012814;M_0012814            | uc033gng.1                           | cell division cycle 20B (C              | chr13 | 1.13E+08    |
| Ankk1             | 3C145078;NM_172922             | uc009pjb.1                           | eat and kinase domain co                | chr9  | 15221;4941  |
| AK029418          | AK029418                       | uc009bzx.1                           | th enriched library, clone              | chr6  | 54551518    |
| Trim62            | NM_178111;NM_178111            | uc008uvo.1                           | artite motif-containing 6               | chr4  | 1.29E+08    |
| Ccdc135           | 83;NM_001;M_0010427            | nxr.1;uc009                          | -coil domain containing 1               | chr8  | 95055102    |
| Gm2016            | l28;NM_00;M_0011226            | gep.1;uc00                           | predicted gene 2016 (Gn                 | chr12 | 14071;8787  |
| Tmem206           | NM_025864;NM_025864            | uc007ech.1                           | smembrane protein 206 (                 | chr1  | 1.91E+08    |
| Zcchc12           | IM_028325;NM_028325            | uc033jpf.1                           | er, CCHC domain containi                | chrX  | 17431;3619  |
| Tgfa              | l31199;AK1;NM_031199           | crj.2;uc009                          | sforming growth factor a                | chr6  | 86195250    |
| Lemd1             | l50;AK0160;M_0010332           | uc007coi.2                           | ;EM domain containing 1 (Lemd1), ml     | chr1  | 16313;1321  |
| Gabbr2            | M_0010811;M_0010811            | uc008sug.1                           | nobutyric acid (GABA) B ri              | chr4  | 46663897    |
| Nkx3-1            | NM_010921;NM_010921            | uc007umd.1                           | ription factor, locus 1 (Dr             | chr14 | 69190691    |
| Slc22a2           | NM_013667;NM_013667            | uc008akw.1                           | 22 (organic cation transp               | chr17 | 12584188    |
| Lama3             | 80;AK1387;NM_010683            | uc008ecf.2                           | ulus laminin, alpha 3 (Lam              | chr18 | 14023;1250  |
| Sult2b1           | l17465;AF4;NM_017465           | gxa.1;uc009                          | ase family, cytosolic, 2B, l            | chr7  | 45729982    |
| Fam83f            | NM_145986;NM_145986            | uc007wvr.1                           | sequence similarity 83, r               | chr15 | 80671846    |
| Dhh               | NM_007857;NM_007857            | uc007xoh.2                           | ulus desert hedgehog (Dh                | chr15 | 98893026    |
| Dppa4             | 610;NM_00610;NM_007zjl.1       | uc007                                | lopmental pluripotency a                | chr16 | 48283734    |
| Tspan15           | l97996;BC0;NM_197996           | fgw.1;uc00                           | ulus tetraspanin 15 (Tspan15), mRNA     | chr10 | 62185395    |
| AK085275          | AK085275                       | uc007don.1                           | gth enriched library, clone:D630003P    | chr1  | 1.71E+08    |
| Gad1              | l08077;AK1;NM_008077           | jzm.1;uc009                          | lutamate decarboxylase                  | chr2  | 170563688   |
| Nfe2              | NM_008685;NM_008685            | uc007xxu.1                           | ear factor, erythroid deriv             | chr15 | 1.03E+08    |
| Chst10            | l50676;BC0;NM_145142           | wjt.1;uc00                           | ohydrate sulfotransferase 10 (Chst10)   | chr1  | 170142;3886 |
| Aldh3a1           | 436;NM_00436;NM_00             | jhd.2;uc00                           | dehydrogenase family 3,                 | chr11 | 61208741    |
| Reep6             | 292;NM_00292;NM_00             | gct.2;uc00                           | s receptor accessory prot               | chr10 | 80330144    |
| Kbtbd13           | NM_028974;NM_028974            | uc009qde.2                           | nd BTB (POZ) domain cor                 | chr9  | 65388683    |
| Mfsd7c            | NM_145447;NM_145447            | uc007ohe.1                           | or superfamily domain co                | chr12 | 85746538    |
| 4933413JO         | 5003;NR_038005                 | uc007ssp.1                           | uc02933413JO9 gene (4933413JO9Rik), lon | chr14 | 17546;2636  |
| Zc3h7b            | l16;AK1719;M_0010810           | uc007wxe.1                           | nger CCCH type containing 7B (Zc3h7)    | chr15 | 14847;8177  |
| Timp4             | l814;NM_0;NM_080639            | dip.1;uc00                           | nhibitor of metalloproteinase 4 (Tim    | chr6  | 15615;1152  |

|            |                     |                                            |                                                      |        |       |            |
|------------|---------------------|--------------------------------------------|------------------------------------------------------|--------|-------|------------|
| Ptpr       | NM_001161           | NM_001161uc007hbt.2                        | tyrosine phosphatase, re                             | 19279  | chr10 | 7257;1160: |
| Inhbb      | NM_008381           | NM_008381uc007cir.1                        | culus inhibin beta-B (Inhbb                          | 16324  | chr1  | 1.19E+08   |
| C530008M29 | AK01645             | NM_0011637                                 | xvh.2;uc007NA C530008M17 gene (C                     | 320827 | chr5  | 0598;7680: |
| Unc13b     | 348;BC0247468       | NM_00spg.2;uc008unc-13                     | homolog B (C. elegans) (Unc1                         |        | chr4  | 3806;4305: |
| Wfdc10     | NM_0010395          | NM_0010395uc008nvo.1                       | our-disulfide core domain                            | 629756 | chr2  | 1.65E+08   |
| Synpo2     | NM_080451           | NM_080451uc012cxa.1                        | ulus synaptopodin 2 (Synp                            | 118449 | chr3  | 1.23E+08   |
| Sh2d4a     | NM_028182           | NM_028182uc009lwe.2                        | H2 domain containing 4A                              | 72281  | chr8  | 68276527   |
| Trpm6      | NM_153417           | NM_153417uc008gyb.1                        | ential cation channel, sub                           | 225997 | chr19 | 8624;1874: |
| Srms       | NM_011481           | NM_011481uc008oll.1                        | inal regulatory tyrosine a                           | 20811  | chr2  | 1.81E+08   |
| Prodh      | 938;NM_0            | NM_011172                                  | mu.1;uc007; proline dehydrogenase (l                 | 19125  | chr16 | 0356;1807: |
| Cnr1       | CDS18025            | NM_00772                                   | uc012dbm.1; cannabinoid receptor 1 (brain) (Cnr1), r |        | chr4  | 3613;3392: |
| Cacng5     | 1;BC12089199301     | NM_007mbb.1                                | nnel, voltage-dependent,                             | 140723 | chr11 | 4604;1078: |
| Slc25a48   | NM_17780            | NM_17780uc007qsn.2                         | carrier family 25, member                            | 328258 | chr13 | 56438354   |
| Gata1      | 80;NM_00            | NM_00808                                   | snl.2;uc009; GATA binding protein 1 (Gata1), mRI     |        | chrX  | 9259;7963: |
| Kcnb2      | NM_0010985          | NM_0010985uc007aje.1                       | ed channel, Shab-related                             | 98741  | chr1  | 15312451   |
| Dtna       | 808;NM_0            | 5808;NM_2uc008eft.2                        | sculus dystrobrevin alpha (Dtna)                     |        | chr18 | 23310019;  |
| Dntt       | 345;NM_00345        | NM_003hlo.1;uc008oxynucleotidyltransferase |                                                      | 21673  | chr19 | 41029274   |
| Cxxc4      | NM_0010043          | NM_0010043uc008rkw.2                       | culus CXXC finger 4 (Cxxc                            | 319478 | chr3  | 1.34E+08   |
| Klhl23     | NM_17778            | NM_17778uc008jys.2                         | culus kelch-like 23 (Klhl2                           | 277396 | chr2  | 69822369   |
| Cntn4      | 73004;BC04_00110975 | 1uc012epu.1; musculus contactin 4 (Cntn4)  |                                                      |        | chr6  | 9367;1061: |
| 2410004I0  | NR_037963           | uc007lta.2                                 | 410004I01 gene (2410004I01Rik), lon                  |        | chr11 | 1.03E+08   |
| Olf316     | NM_0010118          | NM_0010118uc007jce.1                       | olfactory receptor 316 (O                            | 258064 | chr11 | 58757666   |
| Aqp6       | 75087;DQ8           | NM_17508                                   | xpw.1;uc007sculus aquaporin 6 (Aqp6                  | 11831  | chr15 | 99601399   |
| Nkx2-6     | 10920;AF0           | NM_01092                                   | umc.2;uc007ulus NK2 homeobox 6 (Nkx                  | 18092  | chr14 | 1801;6917: |
| Acss1      | NM_08057            | NM_08057uc008muf.2                         | thetase short-chain famil                            | 68738  | chr2  | 1.51E+08   |
| Chrm4      | 7699;CCDS           | NM_00769                                   | 9;uc003;nergic receptor, muscarinic 4 (Chrm4         |        | chr2  | 2188;9192: |
| AK007907   | AK007907            | uc009aoy.1                                 | ngth enriched library, clone:1810059                 |        | chr5  | 1.49E+08   |
| Prkce      | 11104;AK0           | NM_01110                                   | duh.2;uc007; protein kinase C, epsilon               | 18754  | chr17 | 7784;8616: |
| Vil1       | NM_00950            | NM_00950uc007bmb.2                         | musculus villin 1 (Vil1), m                          | 22349  | chr1  | 74409383   |
| Hspa1l     | 13558;CCDS          | NM_01355                                   | hdb.1;uc007heat shock protein 1-like (               | 15482  | chr17 | 6986;3497: |
| Rbm24      | NM_0010814          | NM_0010814uc007qhe.1                       | A binding motif protein 2                            | 666794 | chr13 | 46418299   |
| Myo1a      | 76;NM_001           | 0010812                                    | hkh.2;uc007sculus myosin IA (Myo1a)                  | 432516 | chr10 | 9327;1277: |
| Gdnf       | 010275;U7           | NM_01027                                   | 5vef.1;uc007l line derived neurotrophin              | 14573  | chr15 | 7811010    |
| Nccrp1     | NM_0010811          | NM_0010811uc009fzg.2                       | c cell receptor protein 1 h                          | 233038 | chr7  | 28543595   |
| Slco4a1    | 1688;BC033          | NM_148933                                  | oje.2;uc007nic anion transporter fam                 | 108115 | chr2  | 180472404  |
| Shank2     | 01113373;3373       | NM_0009kqe.2                               | s SH3/ankyrin domain ger                             | 210274 | chr7  | 144396625  |
| Mat1a      | NM_13365            | NM_13365uc007tcm.2                         | ine adenosyltransferase I                            | 11720  | chr14 | 41105032   |
| Masp1      | 08555;AK0           | NM_00855                                   | ytu.1;uc007-binding lectin serine peptidase 1 (Ma    |        | chr16 | 9320;2346: |
| Fam222a    | NM_0010041          | NM_0010041uc008yzt.1                       | equence similarity 222, m                            | 433940 | chr5  | 1.15E+08   |
| Nrap       | ;NM_0012            | 8M_198059                                  | 1uc008hyu.3nebulin-related anchoring protein (Nr     |        | chr19 | 0040;5636: |
| AK142135   | AK142135            | uc033gch.1                                 | enriched library, clone:D230048N02                   |        | chr12 | 3451661    |
| Hist1h1b   | NM_02003            | NM_02003uc007pri.1                         | histone cluster 1, H1b (Hi                           | 56702  | chr13 | 21779882   |
| Ldoc1l     | NM_17763            | NM_17763uc007xcc.1                         | er, down-regulated in cai                            | 223732 | chr15 | 84553397   |
| Cntn1      | 3C055360            | NM_00115                                   | 9;uc007xil.2; musculus contactin 1 (Cntn1)           |        | chr15 | 1164;9194: |
| Lrrc55     | 21;NM_001           | 0010333                                    | byq.1;uc007ine rich repeat containing 55 (Lrrc55)    |        | chr2  | 2333;8518: |
| Reep1      | NM_17860            | NM_17860uc009chc.2                         | ceptor accessory protein                             | 52250  | chr6  | 71707680   |
| Tmsb15a    | NM_03010            | NM_03010uc009uhj.1                         | s thymosin beta 15a (Tms                             | 78478  | chrX  | 1.36E+08   |

|                     |                                                                      |        |       |             |
|---------------------|----------------------------------------------------------------------|--------|-------|-------------|
| Amigo3              | NM_177275;NM_177275uc009rom.1h molecule with Ig like dor             | 320844 | chr9  | 1.08E+08    |
| Sspo                | .42699;AJ49;NM_173428bul.1;uc02sculus SCO-spondin (Sspo), mRNA       |        | chr6  | :7901;4848( |
| Slc13a4             | 428;NM_172892bip.2;uc0013 (sodium/sulfate symporters), men           |        | chr6  | :6502;3526' |
| Lpl                 | 08509;AK0;NM_008509wq.1;uc00sculus lipoprotein lipase (Lpl), mRNA    |        | chr8  | 68880554    |
| Rnf182              | 6480;NM_183204gli.1;uc007 ring finger protein 182 (Rnf182), mR       |        | chr13 | .5796;4366' |
| Aff2                | 081;NM_008032tjb.1;uc00F4/FMR2 family, member 2 (Aff2), m            |        | chrX  | :0330;6985( |
| 3830417A127512;CCDS | NM_027512jqf.1;uc00DNA 3830417A13 gene (3830417A13                   |        | chrX  | '7440;6417: |
| Kif1a               | 147640;AY4110315;NMcd.2;uc007ilus kinesin family membe               | 16560  | chr1  | 93015455    |
| Hecw2               | 001883;NM001883;NMzk.2;uc011w domain containing E3 ul                | 329152 | chr1  | ;53930814;  |
| 2900011O(NM_14451   | NM_14451uc007ygu.1DNA 2900011O08 gene (2                             | 67254  | chr16 | 13986636    |
| Gatm                | NM_025961NM_025961uc008maw.ferase (L-arginine:glycine                | 67092  | chr2  | 1.23E+08    |
| 1600029O(NR_033522  | uc012gul.11600029O15 gene (1600029O15Rik),                           |        | chr9  | 58202896    |
| Adora1              | 10;NM_001A_001008533flj.1;uc03ilus adenosine A1 receptc              | 11539  | chr1  | 1.34E+08    |
| Slc15a2             | 301;NM_00301;NM_00afh.1;uc00amily 15 (H+/peptide tran                | 57738  | chr16 | '1876;3675( |
| Grhl3               | M_0010137M_0010137 uc008vgr.1ainyhead-like 3 (Drosophil              | 230824 | chr4  | 1.36E+08    |
| Dmbt1               | 909;NM_00776kax.1;uc009d in malignant brain tumc                     | 12945  | chr7  | 1.31E+08    |
| Cage1               | 568;NM_02772qdf.1;uc007ilus cancer antigen 1 (Cag                    | 71213  | chr13 | :0910;3800( |
| Ankrd36             | 3C120817;NM_02381uc007hwr.1hkyrin repeat domain 36 (                 | 76389  | chr11 | :9683;5628: |
| Lrrc63              | NM_027581NM_027581uc007uql.2ine rich repeat containing               | 70859  | chr14 | 75084302    |
| Alox12b             | NM_009659NM_009659uc007jpk.1nate 12-lipoxygenase, 12f                | 11686  | chr11 | 69157071    |
| Mug1                | NM_008649NM_008649uc009dor.1ilus murinoglobulin 1 (Mu                | 17836  | chr6  | 1.22E+08    |
| Nlrp14              | M_0010028M_0010028 uc009jax.2aily, pyrin domain contain              | 76858  | chr7  | 1.07E+08    |
| Fam167a             | NM_177628NM_177628uc007uhr.2equense similarity 167, m                | 219148 | chr14 | 63436393    |
| Casq1               | 865;NM_009813dqa.2;uc00ilus calsequestrin 1 (Casq                    | 12372  | chr1  | 1.72E+08    |
| AK198904            | AK198904 uc008bss.1nce:ENSEMBL:Mouse-Transcript-ENS                  |        | chr17 | 29332075    |
| Med12l              | 77855;AK0;NM_177858pii.2;uc00ator complex subunit 12-like (Med12l    |        | chr3  | ;59005824;  |
| Rnf152              | 8;NM_1787160368;NMuc011wpz.1ulus ring finger protein 152 (Rnf152)    |        | chr1  | '6916;1052( |
| Abcc2               | NM_013806NM_013806uc008how.1ette, sub-family C (CFTR/N               | 12780  | chr19 | 43782307    |
| Plcb2               | 8;AK045469NM_177568;uc008lsi.1ulus phospholipase C, beta 2 (Plcb2)   |        | chr2  | .4238;1187: |
| Fmo4                | 562;NM_144878dhw.1;uc00i containing monooxygen                       | 226564 | chr1  | :3882;1628( |
| Gprasp2             | 163017;CCIM_0011630jtc.1;uc009upled receptor associated              | 245607 | chrX  | :9033;1358: |
| Rab25               | NM_016899NM_016899uc008pvn.1, member RAS oncogene f                  | 53868  | chr3  | 88542028    |
| Esr2                | NM_20770.0157;NM_uc007nxw.1ilus estrogen receptor 2 (beta) (Esr2)    |        | chr12 | 76120418    |
| Tmc5                | 2;AK02840105252;NMuc009jke.2;membrane channel-like g                 | 74424  | chr7  | :7296;1186: |
| Cpvl                | _001289714_001289714uc012emc.2carboxypeptidase, vitellogenic-like (C |        | chr6  | 53873278    |
| Nap115              | NM_021432NM_021432uc009cdg.1some assembly protein 1-                 | 58243  | chr6  | 58905232    |
| Slc16a14            | NM_027921NM_027921uc007btd.1nonocarboxylic acid trans                | 71781  | chr1  | 84906704    |
| Pak3                | NM_008778NM_008778uc009umi.2rotein (Cdc42/Rac)-activated kinase      |        | chrX  | :3286;1435: |
| Brdt                | _054054;N054;NM_00uc008ymb.1us bromodomain, testis-sj                | 114642 | chr5  | :9771;1073: |
| AK157878            | AK157878 uc009mlj.1iched library, clone:F930003C09 proc              |        | chr8  | 83932328    |
| Inha                | NM_010564NM_010564uc007bps.1sculus inhibin alpha (Inha               | 16322  | chr1  | 75507076    |
| Oas1c               | NM_033541NM_033541uc008zid.1 oligoadenylate synthetas                | 114643 | chr5  | 1.21E+08    |
| Atp1b2              | NM_013415NM_013415uc007jqo.1/K+ transporting, beta 2 p               | 11932  | chr11 | 69599749    |
| Cdc6                | 79;NM_011025779;NMuc007lhw.1sculus cell division cycle (             | 23834  | chr11 | :8150;9890' |
| Pcsk6               | 60;NM_0111048hw.2;uc00rotein convertase subtilisin                   | 18553  | chr7  | 65862135    |
| Ptch1               | B214501;NM_008957uc007qxy.1us patched homolog 1 (Ptch1), mRNA        |        | chr13 | .1531;6354: |
| Arnt2               | AK032628;NM_007488uc009ieh.2;arbon receptor nuclear translocator 2   |        | chr7  | 84246274    |

|            |                                                                                               |       |              |
|------------|-----------------------------------------------------------------------------------------------|-------|--------------|
| Ptprv      | NM_007955;NM_007955 uc007csr.2 osine phosphatase, receptor type, V (                          | chr1  | 1.35E+08     |
| Hhat1      | 29095;NR_CNM_029095sdx.2;uc009s hedgehog acyltransferase 1 (Hhat1)                            | chr9  | 1.22E+08     |
| Gm595      | M_0010854;M_0010854 uc009tcu.1 is predicted gene 595 (Gm 209005                               | chrX  | 48841465     |
| Celf3      | );NM_1724289620;NM;uc008qgp.2UGBP, Elav-like family member 3 (Celf3)                          | chr3  | 12721;94478  |
| Soga2      | 963;NM_00963;NM_00963du.2;uc009ulus SOGA family member 2 (Soga2)                              | chr17 | 17965;66330  |
| Xylb       | ;AK167735;I9568;NM_(uc009sav.2ylulokinase homolog (H. influenzae) (Xylb)                      | chr9  | 119357380    |
| Rasgrf1    | _011245;NM_011245;NM_00909qzt.1 pecific guanine nucleotide exchange factor 1 (Rasgrf1)        | chr9  | 89909774     |
| Zkscan16   | M_0010993;M_0010993 uc008szl.1 with KRAB and SCAN domain (Zkscan16)                           | chr4  | 58943627     |
| Gucy2e     | 1282;NM_01282;NM_008197jpn.2;uc009s guanylate cyclase 2e (Gucy2e)                             | chr11 | 18116;69220  |
| Vnn1       | NM_011704;NM_011704uc007eqc.2nusculus vanin 1 (Vnn1), rat                                     | chr10 | 23894687     |
| Nrm        | NM_134122;NM_134122 uc008cis.1 nuclear envelope membrane protein 1 (Nrm)                      | chr17 | 35861317     |
| Lrrn1      | 0399;NM_CNM_008518itr.1;uc009rich repeat protein 1, neuronal (Lrrn1)                          | chr6  | 109725;10750 |
| Spock2     | 152994;AK152994;NM_052994fel.1;uc009wcv and kazal-like domains proteoglycan 2 (Spock2)        | chr10 | 60106256     |
| Nkx2-3     | NM_008699;NM_008699uc008hok.1lus NK2 homeobox 3 (Nkx2-3)                                      | chr19 | 43612324     |
| Abca13     | 1546;NM_01546;NM_178259iaa.1;uc009sette, sub-family A (ABC1), member 13 (Abca13)              | chr11 | 9191941      |
| Slc37a2    | 258;NM_00258;NM_00258oul.2;uc00937 (glycerol-3-phosphate 3-kinase, cytosolic) (Slc37a2)       | chr9  | 37229148     |
| Fbxo16     | 143554;AK0143554;NM_015797ujd.1;uc009lus F-box protein 16 (Fbxo16), mRNA                      | chr14 | 65266700     |
| Kitl       | 40534;AK040534;NM_013598uc007gxr.1;nusculus kit ligand (Kitl), rat                            | chr10 | 100015823    |
| AK040967   | AK040967 uc007rjl.1 length enriched library, clone:A530052                                    | chr13 | 89739459     |
| Plekhd1    | 1177503;AK1177503;NM_0011775obf.2;uc009ntaining, family D (with coiled-coil domain) (Plekhd1) | chr12 | 12600;80720  |
| AK039373   | AK039373 uc007jwn.1gth enriched library, clone:A330033M                                       | chr11 | 70748704     |
| Slc26a7    | NM_145947;NM_145947uc008saz.2: carrier family 26, member 7 (Slc26a7)                          | chr4  | 14505196     |
| Cecr6      | NM_033567;NM_033567uc009dnk.1ome chromosome region, chromosome 6 (Cecr6)                      | chr6  | 1.2E+08      |
| Pou2f3     | NM_011139;NM_011139uc009pbe.1ain, class 2, transcription factor 3 (Pou2f3)                    | chr9  | 43123938     |
| Fam19a5    | R_045510;NR_045510;NM_00907xef.1th sequence similarity 19, member A1 (Fam19a5)                | chr15 | 187715546;   |
| Fgf13      | NM_010200;NM_010200uc009thu.2us fibroblast growth factor 13 (Fgf13)                           | chrX  | 12149;59130  |
| Flrt1      | 11411;CCDS11411;NM_201411gkh.3;uc03leucine rich transmembrane protein 1 (Flrt1)               | chr19 | 12010;70950  |
| Ccdc96     | NM_025725;NM_025725uc008xeq.1d-coil domain containing protein 96 (Ccdc96)                     | chr5  | 36484587     |
| Stpg1      | NM_030189;NM_030189uc012dnb.1 tail PG rich repeat containing protein 1 (Stpg1)                | chr4  | 15986;13540  |
| Ttll11     | 129774;BC1129774;NM_029774hmq.1;uc009osine ligase-like family, member 11 (Ttll11)             | chr2  | 35751225     |
| Gm13225    | BC086318 uc008vrz.1Name: Full=Protein Gm13225                                                 | chr4  | 1.46E+08     |
| Slit1      | NM_015748;NM_015748uc008hmf.2slit homolog 1 (Drosophila) (Slit1)                              | chr19 | 41600256     |
| Xylt1      | AK033309;NM_017564uc012fsp.1;lus xylosyltransferase 1 (Xylt1)                                 | chr7  | 15491;11730  |
| Abhd3      | NM_134130;NM_134130uc008eba.1rdrolase domain containing protein 3 (Abhd3)                     | chr18 | 10644410     |
| Vat1l      | NM_173016;NM_173016uc009noa.1sport protein 1 homolog-1 (Vat1l)                                | chr8  | 1.14E+08     |
| Fbxo32     | NM_026346;NM_026346uc007vtk.3 lus F-box protein 32 (Fbxo32)                                   | chr15 | 58175878     |
| Gpr68      | 75493;NM_0175493otb.2;uc009G protein-coupled receptor 68 (Gpr68)                              | chr12 | 16681;10080  |
| Atp8b5     | 77195;AK077195;NM_177195spl.1;uc009se, class I, type 8B, member 5 (Atp8b5)                    | chr4  | 43267158     |
| Gylt1b     | 13;AK08179166633;NMuc008kxq.2us glycosyltransferase-like 1B (Gylt1b)                          | chr2  | 18068;92360  |
| Neo1       | M_001042584;NM_001042584uc009pxj.1is musculus neogenin (Neo1)                                 | chr9  | 14679;58910  |
| Gjb3       | M_00116001160012;NMuc008uus.2 us gap junction protein, beta 3 (Gjb3)                          | chr4  | 15234;12730  |
| Rho        | NM_145383;NM_145383uc009djk.1usculus rhodopsin (Rho), rod outer segment (Rho)                 | chr6  | 1.16E+08     |
| Prrg2      | 1453;NM_01453;NM_022999gsw.1;uc009(G-carboxyglutamic acid) synthase 2 (Prrg2)                 | chr7  | 45053606     |
| Rnf144b    | 170643;NM170643;NMqhz.2;uc009lus ring finger protein 144 (Rnf144b)                            | chr13 | 14002;47120  |
| 1700019B21 | 5442;NR_045443 uc009til.1;uc029N cDNA 1700019B21 gene (1700019B21)                            | chrX  | 62510538     |
| Plxdc1     | 199;NM_00199;NM_00199lfc.2;uc011us plexin domain containing protein 1 (Plxdc1)                | chr11 | 97923236     |
| Slc6a12    | 1532;NM_01532;NM_133661dok.1;uc009transmitter transporter, beta 12 (Slc6a12)                  | chr6  | 13087;12130  |

|           |                                                                       |          |       |             |
|-----------|-----------------------------------------------------------------------|----------|-------|-------------|
| Tmem30b   | NM_178715;NM_178715;uc007nwm.1;smembrane protein 30B (                | 238257   | chr12 | 73543113    |
| Nxf7      | 8;AJ305317NM_130888;uc009uhh.1;nuclear RNA export factor              | 170722   | chrX  | 1.36E+08    |
| Kcng1     | uc010811;uc010811;uc008oat.1;g-gated channel, subfam                  | 241794   | chr2  | 1.68E+08    |
| Zbtb39    | 4249;NM_1NM_198037;hkl.1;uc03;er and BTB domain containi              | 320080   | chr10 | 1558;1277:  |
| Tmem180   | 1169;NM_0NM_029188;htl.1;uc008;smembrane protein 180 (                | 75146    | chr19 | 46356879    |
| Glb1l2    | 1057;NM_1NM_15380;opu.1;uc01;alactosidase, beta 1-like 2              | 244757   | chr9  | 5287;2676:  |
| Cyp19a1   | 107810;EU2NM_007810;omu.1;uc01l cds;Mus musculus cytoc                | 13075    | chr9  | 3256;5416:  |
| Fam181a   | 358;NM_00NM_0011957;yx.1;uc03;equence similarity 181, m               | 1.01E+08 | chr12 | 4958;1033:  |
| Rprm      | NM_023396;NM_023396;uc008jrp.1;ependent G2 arrest med                 | 67874    | chr2  | 54084092    |
| Tbx6      | 10951;NM_0NM_011532;ftu.1;uc00;musculus T-box 6 (Tbx6), r             | 21389    | chr7  | 1.27E+08    |
| Extl1     | 119578;AK1NM_019578;imu.1;uc00exostoses (multiple)-like 1             | 56219    | chr4  | 1.34E+08    |
| Pvrl1     | NM_021424;NM_021424;uc009pbj.1;oliovirus receptor-related             | 58235    | chr9  | 43744575    |
| 2900056M1 | 10269;NR_040270;uc029xnp.2;uc02;N cDNA 2900056M20 gene (2900056)      |          | chrX  | 1.52E+08    |
| Itgae     | M_008399;18399;NM_;uc007jzx.2;tegrin alpha E, epithelial-e            | 16407    | chr11 | 73090594    |
| Unc13d    | 10010095;10010095;uc007mjt.1-13 homolog D (C. elegans:                | 70450    | chr11 | 5410;1160:  |
| Tyro3     | 1343;NM_01NM_019392;luq.1;uc00;TYRO3 protein tyrosine ki              | 22174    | chr2  | 9513;1197:  |
| Scara5    | 1903;NM_00903;NM_00ujn.2;uc007;er receptor class A, memb              | 71145    | chr14 | 65666402    |
| Sema3g    | 10010253;10010253;uc007sxe.1 main (lg), short basic dor               | 218877   | chr14 | 31217872    |
| Pzca      | NM_028216;NM_028216;uc007wfr.2 prostate stem cell antiger             | 72373    | chr15 | 74714838    |
| Kcnn2     | AK033158;ANM_080465;uc012bco.1;uctance calcium-activate               | 140492   | chr18 | 9350;4526:  |
| Rapsn     | 109023;AK0NM_009023;bzc.1;uc008;associated protein of the             | 19400    | chr2  | 91035626    |
| Zxda      | NR_003292 uc009ttr.1 er, X-linked, duplicated A (Zxda), non-          |          | chrX  | 94791284    |
| Capn5     | 11767;NM_0NM_007602;ikd.1;uc00;usculus calpain 5 (Capn5),             | 12337    | chr7  | 98121564    |
| Epha8     | NM_007939;NM_007939;uc008vis.1;ulus Eph receptor A8 (Eph              | 13842    | chr4  | 1.37E+08    |
| 1700086L1 | NR_030734;NR_030734;uc011ynu.1;N cDNA 1700086L19 gene (1700086)       |          | chr12 | 74284275    |
| Cyp26b1   | 13;NM_175177713;NMuc009coz.2;P450, family 26, subfamily               | 232174   | chr6  | 84571413    |
| Mycn      | 10783;NM_0NM_00870;nbg.2;uc00;ral related oncogene, neu               | 18109    | chr12 | 12936092    |
| Pcdhgc4   | NM_033582;NM_033582;uc008erf.1;adherin gamma subfamily                | 93703    | chr18 | 37815078    |
| Prokr1    | 121381;AK1NM_021381;ctp.1;uc00; prokineticin receptor 1 (Prokr1), mRI |          | chr6  | 87578591    |
| Abhd6     | 111887;AK1NM_025341;zfu.1;uc007;drolase domain containin              | 66082    | chr14 | 12901;8002: |
| Gab3      | NM_181584;NM_181584;uc009tpn.2;eptor bound protein 2-ass              | 210710   | chrX  | 74988544    |
| Kcnc4     | NM_145922;NM_145922;uc008qxa.1;ed channel, Shaw-related               | 99738    | chr3  | 1.07E+08    |
| Gckr      | NM_144909;NM_144909;uc008wyf.1;ucokinase regulatory prot              | 231103   | chr5  | 31297580    |
| 1700008I0 | NM_027952;NM_027952;uc009uhi.2;DNA 1700008I05 gene (1                 | 71841    | chrX  | 1.36E+08    |
| Hdc       | NM_008233;NM_008233;uc008mdr.2;is histidine decarboxylase             | 15186    | chr2  | 1.27E+08    |
| Zcchc18   | 3;NM_00100103551;C9ujk.1;uc00;finger, CCHC domain cont                | 66995    | chrX  | 14637;1369: |
| Negr1     | 1039094;NM039094;NM;rvc.2;uc008;is neuronal growth regula             | 320840   | chr3  | 1.57E+08    |
| Pnma5     | 1100461;CCM_0011004;hjj.1;uc03;neoplastic antigen family              | 385377   | chrX  | 5217;7303:  |
| St8sia6   | NM_145838;NM_145838;uc008ikc.2 -neuraminide alpha-2,8-si              | 241230   | chr2  | 13654935    |
| Dcdc2a    | 1577;NM_00577;NM_00;ww.2;uc00;ublecortin domain contai                | 195208   | chr13 | 25056003    |
| Fam184b   | 1544;NM_0NM_021418;xa.2;uc008;equence similarity 184, m               | 58227    | chr5  | 9704;4555:  |
| 1810041L1 | 11163145;AKM_0011631;xcb.2;uc00;DNA 1810041L15 gene (1                | 72301    | chr15 | 84379202    |
| Six2      | NM_011383;NM_011383;uc008duc.2;ie oculis-related homeobc              | 20472    | chr17 | 85684267    |
| Sytl4     | 130401;BC0NM_013757;ufe.1;uc00;sculus synaptotagmin-like              | 27359    | chrX  | 16384;1339: |
| Tcf24     | 10012854;10012854;uc033fhz.1;s transcription factor 24 (              | 1E+08    | chr1  | 9960162     |
| Cdo1      | NM_033037;NM_033037;uc008evt.1;eine dioxygenase 1, cytos              | 12583    | chr18 | 46713204    |
| Hsd11b2   | 108289;BC0NM_008289;nde.1;uc00;eroid 11-beta dehydrogei               | 15484    | chr8  | 1.06E+08    |

|          |            |            |             |                                           |        |       |            |
|----------|------------|------------|-------------|-------------------------------------------|--------|-------|------------|
| Gamt     | 10255;AK1  | NM_010255  | gcl.2;uc01  | dinoacetate methyltransf                  | 14431  | chr10 | 80258150   |
| Mcf2l    | 1_0011594  | 00115948   | uc009kwp.1  | mcf.2 transforming seque                  | 17207  | chr8  | 7918;1300  |
| L3mbtl4  | 77278;AK0  | NM_177278  | kk.2;uc0083 | jmbt-like 4 (Drosophila) (L3mbtl4), n     |        | chr17 | 68273796   |
| Spire2   | 72287;BC0  | NM_172287  | nvk.1;uc00  | ire homolog 2 (Drosophila) (Spire2), r    |        | chr8  | 12712;1233 |
| Ppp1r26  | 336;NM_00  | 1_0010054  | hme.1;uc00  | sphatase 1, regulatory su                 | 241289 | chr2  | 17940;2845 |
| Bpifc    | NM_17777   | 2NM_17777  | uc007gnj.2  | PI fold containing family                 | 270757 | chr10 | 85959690   |
| Dhtkd1   | 1081131;AK | 1_0010811  | iga.1;uc00  | 1 and transketolase domain containir      |        | chr2  | 4088;5898  |
| Btn1a1   | NM_01348   | 3NM_01348  | uc007ptq.2  | philin, subfamily 1, memb                 | 12231  | chr13 | 16992;2346 |
| Slc38a5  | 72479;AK1  | NM_172479  | sos.1;uc00  | 9 carrier family 38, memb                 | 209837 | chrX  | 11641;8271 |
| B4galt6  | NM_01973   | 7NM_01973  | uc008eeu.2  | beta 1,4-galactosyltransfe                | 56386  | chr18 | 20684598   |
| Rph3al   | 3335;NM_0  | NM_02954   | kkx.1;uc00  | 7philin 3A-like (without C2               | 380714 | chr11 | 12157;7589 |
| Lphn1    | NM_18103   | 9NM_18103  | uc009mlh.2  | sculus latrophilin 1 (Lphn1               | 330814 | chr8  | 14150;8390 |
| Palm3    | 128877;AK0 | NM_028877  | ggy.1;uc00  | 9sculus paralemmin 3 (Palm                | 74337  | chr8  | 84021473   |
| Sorcs3   | NM_02569   | 6NM_02569  | uc008hvx.1  | d VPS10 domain containir                  | 66673  | chr19 | 48206024   |
| Dgkg     | 3258;NM_1  | NM_13865   | ysh.2;uc00  | 1acylglycerol kinase, gamn                | 110197 | chr16 | 22466568   |
| Bcan     | 529;NM_00  | 529;NM_00  | ptp.2;uc00  | 8us musculus brevican (Bca                | 12032  | chr3  | 17530;8799 |
| Zmym1    | 26670;AK1  | NM_026670  | ue.1;uc00   | 8ger, MYM domain contain                  | 68310  | chr4  | 127051077  |
| Lmln     | NM_17282   | 3NM_17282  | uc007yzx.1  | sin-like (metallopeptidase                | 239833 | chr16 | 33062520   |
| Arc      | 1_018790;  | N790;NM_00 | uc007wfo.2  | regulated cytoskeletal-as                 | 11838  | chr15 | 11181;7466 |
| Rnf43    | 8;AK15363  | 8NM_17244  | uc007kud.1  | is ring finger protein 43 (R              | 207742 | chr11 | 187727171; |
| Msh3     | 34;BC02506 | VM_01082   | uc033gmq.1  | mutS homolog 3 (E. coli)                  | 17686  | chr13 | 192345868; |
| Fanca    | 08119;AF2  | (NM_01692  | nvng.1;uc00 | 9nemia, complementation group A (Fa       |        | chr8  | 18243;1232 |
| Hsbp111  | 1_0011361  | 1_0011361  | uc008fs.2   | k factor binding protein 1                | 66255  | chr18 | 80229755   |
| Plxna1   | NM_00888   | 1NM_00888  | uc009cwg.2  | sculus plexin A1 (Plxna1)                 | 18844  | chr6  | 89316313   |
| AK134928 | AK134928   |            | uc009qrz.1  | ength enriched library, clone:643051      |        | chr9  | 75310334   |
| Erbp2    | 1_0010038  | 1_0010038  | uc007lgi.1  | ne homolog 2, neuro/glio                  | 13866  | chr11 | 98412483   |
| Dtl      | 1999;AB095 | VM_02976   | ecnc.1;uc00 | 7nticleless homolog (Drosophila) (Dtl),   |        | chr1  | 19828;1915 |
| Abcg5    | NM_03188   | 4NM_03188  | uc008dsz.1  | ssette, sub-family G (WHI                 | 27409  | chr17 | 84658233   |
| Rps6ka6  | 54113;AK0  | NM_02594   | uda.1;uc00  | 1 protein S6 kinase polype                | 67071  | chrX  | 1.11E+08   |
| Map6d1   | NM_19859   | 9NM_19859  | uc007ypk.1  | AP6 domain containing 1                   | 208158 | chr16 | 20233308   |
| Fam60a   | 1519;NM_0  | NM_01964   | etr.1;uc00  | 9sequence similarity 60, m                | 56306  | chr6  | 1.49E+08   |
| Opcml    | 6;AK01379  | 2NM_17790  | uc009oqq.1  | g protein/cell adhesion m                 | 330908 | chr9  | 13148;2779 |
| Slc5a3   | 7403;NM_C  | NM_01739   | 7zyt.2;uc03 | 5 family 5 (inositol transporters), membe |        | chr16 | 17056;9205 |
| Cngb1    | 601;NM_00  | 501;NM_00  | myb.2;uc00  | lic nucleotide gated chan                 | 333329 | chr8  | 19042;9529 |
| Plxnc1   | NM_01879   | 7NM_01879  | uc007gvz.3  | sculus plexin C1 (Plxnc1),                | 54712  | chr10 | 94790865   |
| Iqgap2   | 1038;NM_0  | NM_02771   | 1mo.1;uc00  | 7ntaining GTPase activating               | 544963 | chr13 | 11401;9562 |
| AK039686 | AK039686   |            | uc012esz.1  | ermline small RNA gsRNA124, comple        |        | chr6  | 1.28E+08   |
| AU015836 | NR_028320  |            | uc009tsy.2  | quence AU015836 (AU015836), long          |        | chrX  | 93968655   |
| Osbp2    | 8;BC05835  | 6NM_15281  | uc007htq.1  | xysterol binding protein 2 (Osbp2), m     |        | chr11 | 13724401;3 |
| Plekha7  | 5;BC06067  | 8NM_17274  | uc009jja.1  | zy domain containing, family A memb       |        | chr7  | 13790;1161 |
| Sh3rf2   | 146299;NM  | 146299;NM  | betk.2;uc00 | 13 domain containing ring                 | 269016 | chr18 | 42053709   |
| Jam2     | 123844;AK0 | NM_023844  | 7ztg.2;uc00 | 1nction adhesion molecule                 | 67374  | chr16 | 84774122   |
| Dmrtc1a  | 5;NM_0275  | 5;NM_0275  | uc009tzd.2  | ulus DMRT-like family C1a                 | 70887  | chrX  | 1.03E+08   |
| Naalad1  | 1_0010095  | 1_0010095  | uc008ghk.1  | lpha-linked acidic dipepti                | 381204 | chr19 | 6105797    |
| Tmem54   | 13881;NM_  | (13881;NM_ | lwa.2;uc00  | 5 transmembrane protein                   | 66260  | chr4  | 1.29E+08   |
| Wdr27    | AK002615;  | NM_17517   | uc008and.1  | WD repeat domain 27 (Wdr27), mRN          |        | chr17 | 14829330;  |
| Ctnna2   | 1_009819;  | M_009819;  | uc009cjq.2  | 1 (cadherin associated pro                | 12386  | chr6  | 76881636   |

|               |                                                                                   |       |             |
|---------------|-----------------------------------------------------------------------------------|-------|-------------|
| Cobll1        | <083510;NM7025;NM_uc008jwa.2; musculus Cobl-like 1 (Cobll1)                       | chr2  | ;65088338;  |
| Osbpl11       | NM_17684(NM_17684uc007zyz.2:erol binding protein-like 106326                      | chr16 | 33185070    |
| Adam3         | 9;BC060975NM_009615uc009lfd.1; metallopeptidase domain 3 (cyritest                | chr8  | 17246;2467  |
| Mbnl3         | 3;AK167342NM_13416uc009tdu.1 scleblind-like 3 (Drosophil 171170                   | chrX  | 51113493    |
| Dbx2          | NM_20753NM_20753uc007xjs.1 :veloping brain homeobox 223843                        | chr15 | 95623562    |
| Arxes2        | NM_02982NM_02982uc009uhz.2:d X-chromosome express 76219                           | chrX  | 1.36E+08    |
| Syt6          | 1276680;NF580;NM_00uc008qtb.1:usculus synaptotagmin VI (Syt6)                     | chr3  | 103575281   |
| Nr3c2         | NM_0010839NM_0010839uc009mhl.1:ptor subfamily 3, group C 110784                   | chr8  | 76902507    |
| Fbxo47        | 1081435;BC0100108147lfa.1;uc007:us F-box protein 47 (Fbxo 72973                   | chr11 | 97854306    |
| A730020E08Rik | 1081435;BC0100108147lfa.1;uc007:us F-box protein 47 (Fbxo 72973                   | chr6  | 61175603    |
| AK132074      | AK132074 uc008zfm.1:gth enriched library, clone:3010060E1                         | chr5  | 1.17E+08    |
| Capn11        | NM_0010137NM_0010137 uc008crh.1:sculus calpain 11 (Capn11 268958                  | chr17 | 45630203    |
| Fev           | 53111;BC1NM_153111wnd.1;uc007 FEV (ETS oncogene family 260298                     | chr1  | 74881508    |
| Grip2         | NM_0011595NM_0011595uc012epd.2:te receptor interacting pr 243547                  | chr6  | 91761509    |
| Epb4.1l3      | 146;NM_01NM_01381awk.1;uc01ocyte protein band 4.1-like 3 (Epb4.1l                 | chr17 | 17858;69248 |
| Ptgds         | NM_00896NM_00896uc008isf.1 :taglandin D2 synthase (br 19215                       | chr2  | 25466711    |
| Esr1          | 638;NM_0(NM_007955gv.1;uc007estrogen receptor 1 (alph 13982                       | chr10 | 10157;47123 |
| Fign          | NM_001267NM_001267uc008jvv.3;1:us musculus fidgetin (Fign)                        | chr2  | 63971507    |
| Syt15         | NM_176931;6931;NM_1uc007tal.2:sculus synaptotagmin XV 319508                      | chr14 | 34220045    |
| Zfp831        | NM_0010993NM_0010993 uc008ofh.1. zinc finger protein 831 (Z 1E+08                 | chr2  | 1.75E+08    |
| Frmd4a        | ;NM_00117NM_001177ieq.1;uc008s FERM domain containin 209630                       | chr2  | 10975;41528 |
| Rtn4rl1       | NM_17770NM_17770uc007kdh.1:eticulon 4 receptor-like 1 237847                      | chr11 | 75193992    |
| lqsec1        | ;AK157963;4383;NM_1uc009cxq.2;1:us IQ motif and Sec7 doma 232227                  | chr6  | 19579;90658 |
| Aox2          | NM_0010084NM_0010084uc007bbp.1:us aldehyde oxidase 2 (A 213043                    | chr1  | 58278325    |
| 8430427H17    | 1001001986;1986;NM_1uc008nhv.2:N cDNA 8430427H17 gen 329540                       | chr2  | 17460;15348 |
| Gm15787       | 10431;NR_040430uc029vkj.1;uc008lus predicted gene 15787 (Gm15787)                 | chr5  | 1.1E+08     |
| Gm7008        | 4585;NR_045157 uc029rrz.1;uc007ted gene 7008 (Gm7008), long non-cc                | chr12 | 40223363    |
| Ppara         | 144;NM_00144;NM_001xdk.2;uc007ime proliferator activated 19013                    | chr15 | 15563;85738 |
| Gng7          | 319;NM_00319;NM_00gfn.1;uc007leotide binding protein (C 14708                     | chr10 | 80948623    |
| Col25a1       | 1085241;NM_00124498riy.1;uc03s collagen, type XXV, alpha 1 (Col25a: 10844;13048   | chr3  | 10844;13048 |
| Pnkd          | 3999;BC058NM_019999;tblu.1;uc007roxysmal nonkinesinogenic 56695                   | chr1  | 15033;74338 |
| Glyctk        | 1039586;NM_039586;NM_09riz.1;uc008usculus glycerate kinase ( 235582               | chr9  | 1.06E+08    |
| Pgpep1        | NM_02321NM_02321uc009mbc.2:yroglutamyl-peptidase I ( 66522                        | chr8  | 70646435    |
| Sult5a1       | 1243;NM_0(NM_020564mn.1;uc008nsferase family 5A, member 1 (Sult5: 1.23E+08        | chr8  | 1.23E+08    |
| Nudt10        | NM_0010316NM_0010316uc009skw.2:iphosphate linked moiety X)-type mo 6168695        | chrX  | 6168695     |
| Peg10         | 7407;NM_1040611;NM_iob.1;uc008ulus paternally expressed 170676                    | chr6  | 17305;47548 |
| Prokr2        | NM_14494NM_14494uc008mmp.2:rokineticin receptor 2 (F 246313                       | chr2  | 1.32E+08    |
| lqsec3        | 7268;NM_019685;NM_1dom.2;uc008us IQ motif and Sec7 doma 243621                    | chr6  | 14809;12138 |
| S100a14       | NM_00116352NM_00116352uc012csy.1;100 calcium binding protei 66166                 | chr3  | 90526848    |
| Syt13         | NM_03072NM_03072uc008lfn.1 :us synaptotagmin XIII (Sy 80976                       | chr2  | 92915100    |
| A230056J06    | NR_045633 uc007qut.1:230056J06 gene (A230056 67269                                | chr13 | 59580175    |
| lpcef1        | NM_0010313391;NM_1efs.1;uc011n protein for cytohesin ex 320495                    | chr10 | 126886364;6 |
| Plac1         | ;AK145876NM_019535uc009teu.1:alacental specific protein 1 (Plac1), ml 10001;53078 | chrX  | 10001;53078 |
| Brwd3         | 1081477;AK10010814jcn.1;uc008n and WD repeat domain 382236                        | chrX  | 13351;10878 |
| Slc29a3       | 17065;AK0(NM_023595eo.1;uc011ly 29 (nucleoside transpor 71279                     | chr10 | 14620;60718 |
| C1galt1       | NM_05299NM_05299uc009axg.2:N-acetylgalactosamine 3-t 94192                        | chr6  | 7845223     |
| BC069935      | BC069935 uc009eje.1:ne, EG381818, mRNA (cDNA clone IN 1.32E+08                    | chr6  | 1.32E+08    |



|            |           |                              |                                           |           |       |             |
|------------|-----------|------------------------------|-------------------------------------------|-----------|-------|-------------|
| Cdh20      | NM_011806 | NM_011806uc007cgc.1          | sculus cadherin 20 (Cdh20)                | 23836     | chr1  | 1.05E+08    |
| Tmem245    | NM_175518 | NM_175518uc008sxw.2          | membrane protein 245 (Tmem245)            | 242474    | chr4  | 56876012    |
| Phf13      | NM_172705 | NM_172705uc008vyx.2          | s PHD finger protein 13 (Phf13)           | 230936    | chr4  | 1.52E+08    |
| Mettl21c   | NM_001013 | NM_0010137avv.1;uc007        | thyltransferase like 21C (Mettl21c), r    | 76;245537 | chr1  | .0509;4400! |
| Nlgn3      | NM_172932 | NM_1729329txi.2;uc00!        | sculus neuroligin 3 (Nlgn3)               | 245537    | chrX  | !5290;1012! |
| Sema7a     | NM_011352 | NM_011352uc009pvy.1          | main (Ig), and GPI memt                   | 20361     | chr9  | 57940134    |
| Atp8a2     | NM_015802 | NM_015802uc007uet.1          | lipid transporter-like, class I, type 8A, | 245537    | chr14 | !7512;5964! |
| Snap25     | NM_011428 | NM_011428uc008mop.1          | aptosomal-associated pr                   | 20614     | chr2  | 1.37E+08    |
| Enpp2      | NM_011428 | NM_011428uc008mop.1          | aptosomal-associated pr                   | 20614     | chr2  | 1.37E+08    |
| Enpp2      | NM_011428 | NM_011428uc008mop.1          | aptosomal-associated pr                   | 20614     | chr2  | 1.37E+08    |
| Enpp2      | NM_011428 | NM_011428uc008mop.1          | aptosomal-associated pr                   | 20614     | chr2  | 1.37E+08    |
| Ass1       | NR_002687 | NR_002687uc008jdu.1          | glinosuccinate synthetas                  | 11898     | chr2  | 31470269    |
| Calr4      | NM_001285 | NM_001285uc008uce.2          | musculus calreticulin 4 (Calr4)           | 54725     | chr4  | 5631;1092!  |
| Bcat2      | NM_001242 | NM_001242uc009wd.2;uc00!     | chain aminotransferase :                  | 12036     | chr7  | !45570152;  |
| Abat       | NM_170978 | NM_170978uc007lmyco.2;uc007! | -aminobutyrate aminotra                   | 268860    | chr16 | 8513428     |
| Cadm1      | NM_005383 | NM_005383770;NM_00!          | cell adhesion molecul                     | 54725     | chr9  | !0351;4781! |
| Ppt1       | NM_008917 | NM_008917uc008uoh.2          | mitoyl-protein thioesterase 1 (Ppt1),     | 17196     | chr4  | 1.23E+08    |
| Mbp        | NM_001025 | NM_001025254;NM_00!          | myelin basic protei                       | 17196     | chr18 | !5122;8255! |
| 4930405A21 | NR_040505 | NR_040505uc008nns.230405A21  | gene (4930405A21Rik), lor                 | 17196     | chr2  | 1.57E+08    |
| Bsn        | NM_007567 | NM_007567uc009rov.1          | musculus bassoon (Bsn), r                 | 12217     | chr9  | 1.08E+08    |
| Rims4      | NM_183022 | NM_183022uc008nto.1          | g synaptic membrane exo                   | 241770    | chr2  | 1.64E+08    |
| Ston2      | NM_175367 | NM_175367okw.1;uc00!         | musculus stonin 2 (Ston2),                | 108800    | chr12 | !3008;9173! |
| Wipf3      | NM_017861 | NM_017861uc012emf.1;uc01!    | ASL interacting protein far               | 330319    | chr6  | 54452882    |
| Olfml2a    | NM_172854 | NM_172854uc008jnv.1          | olfactomedin-like 2A (Ol                  | 241327    | chr2  | 38931979    |
| Epdr1      | NM_134065 | NM_134065ppf.3;uc007         | min related protein 1 (zek                | 105298    | chr13 | 19591707    |
| Dpysl4     | NM_011992 | NM_011992uc009kfj.2          | ihydropyrimidinase-like 4 (Dpysl4), m     | 19401     | chr7  | !6000;1390! |
| Rara       | NM_001177 | NM_00117730177302;NMuc007!   | retinoic acid receptor,                   | 19401     | chr11 | !4871;9893! |
| Fam178a    | NM_001081 | NM_0010812iqb.1;uc012        | equence similarity 178, member A (Fa      | 19401     | chr19 | !1458;4493! |
| Rhof       | NM_175092 | NM_175092znc.1;uc00!         | omolog gene family, member f (Rhof        | 19401     | chr5  | !3043;1231! |
| Sh3tc2     | NM_172628 | NM_172628fcu.1;uc01!         | in and tetratricopeptide r                | 225608    | chr18 | !3074;6198! |
| Bricd5     | NM_175682 | NM_175682awk.1;uc00!         | CHOS domain containing                    | 319259    | chr17 | !3883;2447! |
| Fmn2       | NM_019445 | NM_019445vxb.1;uc00!         | musculus formin 2 (Fmn2),                 | 54418     | chr1  | 174612506   |
| Bag4       | NM_026121 | NM_026121uc009lgy.1          | L2-associated athanogen                   | 67384     | chr8  | 25764538    |
| Trim67     | NM_198632 | NM_198632uc012gmz.1          | bartite motif-containing 6                | 330863    | chr8  | 1.25E+08    |
| Fgf11      | NM_010191 | NM_010191xxa.1;uc00!         | us fibroblast growth factc                | 14166     | chr11 | !7094;6979! |
| Zfp600     | NM_017545 | NM_017545uc011dpa.2;uc01!    | ulus zinc finger protein 60               | 667666    | chr4  | !7689;1461! |
| 1700113A16 | NR_045997 | NR_045997uc008puf.2;uc00!    | 113A16 gene (1700113A16Rik), lor          | 667666    | chr3  | 88171559    |
| Aqp11      | NM_175109 | NM_175109ijt.1;uc00!         | culus aquaporin 11 (Aqp1                  | 66333     | chr7  | 97726378    |
| Rbm20      | NM_011708 | NM_011708hxa.1;uc00!         | A binding motif protein 20 (Rbm20),       | 66333     | chr19 | !3209;5367! |
| Mphosph9   | NM_026907 | NM_026907867;NM_!            | M-phase phosphoprotein                    | 269702    | chr5  | !8514;1242! |
| Crispld1   | NM_031402 | NM_031402akh.1;uc00!         | etory protein LCCL domai                  | 83691     | chr1  | !7416;1772! |
| F630042J09 | NR_033540 | NR_033540uc011zbg.1530042J09 | gene (F630042J09Rik), lon                 | 83691     | chr13 | 67278593    |
| E130309D14 | NM_001013 | NM_0010137avv.1;uc007        | thyltransferase like 21C (Mettl21c), r    | 76;245537 | chr11 | 74619604    |
| Agmat      | NM_001081 | NM_001081uc008vpe.1          | ne ureohydrolase (agmati                  | 75986     | chr4  | 1.42E+08    |
| Barhl2     | NM_001005 | NM_001005uc008ylm.1          | BarH-like 2 (Drosophila) (                | 104382    | chr5  | 1.06E+08    |
| Slc19a3    | NM_030556 | NM_030556bsi.2;uc00!         | carrier family 19, membe                  | 80721     | chr1  | 83012522    |
| Atp6v0e2   | NM_133764 | NM_133764uc009bup.2          | nsporting, lysosomal VO s                 | 76252     | chr6  | 48537568    |
| Fdxr       | NM_007997 | NM_007997uc007mgj.1          | us ferredoxin reductase (f                | 14149     | chr11 | 1.15E+08    |
| Zmat4      | NM_277239 | NM_277239uc011lew.3;uc01!    | ulus zinc finger, matrin type 4 (Zmat4)   | 14149     | chr8  | 23669660    |

|           |                                                                         |        |       |             |
|-----------|-------------------------------------------------------------------------|--------|-------|-------------|
| Bahcc1    | 1250;NM_019842;msd.2;uc01nain and coiled-coil conta                     | 268515 | chr11 | 120232946   |
| Esrrg     | 12;NM_011243792;NMuc007eab.2estrogen-related receptor                   | 26381  | chr1  | 17826;18761 |
| Hs6st2    | C047151;NB19;NM_000099tdx.1;aran sulfate 6-O-sulfotransferase 2 (f      |        | chrX  | 16782;5138  |
| Sp4       | 166385;NM166385;NM7pif.3;uc011 trans-acting transcription               | 20688  | chr12 | 1.18E+08    |
| Tstd1     | 1_0011645_1_0011645;uc011wwd.1;nsferase (rhodanese)-like                | 22278  | chr1  | 1.71E+08    |
| Derl3     | 0;BC099615;NM_02444;uc007ftj.1;-like domain family, member 3 (Derl3     |        | chr10 | 75893397    |
| Ccbl2     | 173763;AF3;NM_173763rpa.1;uc00iteine conjugate-beta lyas                | 229905 | chr3  | 1.43E+08    |
| Mthfd1    | 138745;AK1;NM_138745yny.1;uc00ident), methenyltetrahydr                 | 108156 | chr12 | 76255231    |
| Rragb     | 1_0010041_1_0010041;uc012hqx.1Ras-related GTP binding B                 | 245670 | chrX  | 1.53E+08    |
| Sel1l3    | 0;AK03177;NM_17271;uc008xlc.1;pressor of lin-12-like 3 (C. elegans) (Se |        | chr5  | 153198217;  |
| Ahi1      | 203;NM_00203;NM_000xhc.1;uc00Abelson helper integration site 1 (Ah      |        | chr10 | 120959611;  |
| Polr2a    | 100;NM_000090857jrk.1;uc00RNA) II (DNA directed) po                     | 20020  | chr11 | 69734409    |
| Unc5c     | 2;AK142974;NM_00947;uc008rod.1;c-5 homolog C (C. elegans) (Unc5c), r    |        | chr3  | 1.41E+08    |
| Tmem200b  | 1_0012013_1_0012013;uc012dlz.1 membrane protein 200B (                  | 623230 | chr4  | 1.32E+08    |
| Wdr62     | 3C026444;NM_14618;uc009gdv.1; WD repeat domain 62 (V                    | 233064 | chr7  | 10137;3024  |
| Ung       | 1M_001040677;NM_00;uc008yzyg.1;culus uracil DNA glycosyl                | 22256  | chr5  | 114130434   |
| Zfp275    | 9;CCDS5309160229;NMuc009tlq.2;ulus zinc finger protein 275 (Zfp275)     |        | chrX  | 13249;7334  |
| Zc3h12b   | 1034907;AK1_0010349tua.1;uc00ger CCCH-type containing                   | 547176 | chrX  | 95711677    |
| Bcar3     | 1_01386_1_01386;uc008req.2;ancer anti-estrogen resis                    | 29815  | chr3  | 1.22E+08    |
| Tmem25    | 1375;NM_01027865em.1;uc00insmembrane protein 25 (Tmem25), r             |        | chr9  | 44793778    |
| 6330419J2 | NR_028086 uc009tgd.2330419J24 gene (6330419J24Rik), lon                 |        | chrX  | 56374585    |
| Celsr2    | 1_00100417392;NM_00;uc008qyx.1;-pass G-type receptor 2 (                | 53883  | chr3  | 12375;1083  |
| Hist2h2be | 1_17821_1_17821;uc008qmj.1;istone cluster 2, H2be (Hi                   | 319190 | chr3  | 96221120    |
| Pm20d1    | 178079;BC0;NM_178079qtg.1;uc00itidase S precursor (EC 3.4               | 212933 | chr1  | 16671;1317  |
| Pank1     | 114339;NM114339;NMhgw.3;uc00ulus pantothenate kinase                    | 75735  | chr19 | 34806935    |
| Smad6     | 1_00854_1_00854;uc009qbk.2SMAD family member 6 (                        | 17130  | chr9  | 63953075    |
| Gmpr      | 125508;AK1;NM_025508qha.1;uc00sine monophosphate redu                   | 66355  | chr13 | 17468;4552  |
| Dag1      | 176481;NM176481;NMjna.1;uc009musculus dystroglycan 1 (Dag1)             |        | chr9  | 1.08E+08    |
| Rab36     | 1K046113;ANM_02978;uc007fpw.1, member RAS oncogene f                    | 76877  | chr10 | 175037225;  |
| Gm10789   | NR_033476 uc012aid.1;d gene 10789 (Gm10789), long non-c                 |        | chr16 | 90142236    |
| Mblac2    | 128372;BC1;NM_028377rib.1;uc00ita-lactamase domain containing 2 (M      |        | chr13 | 11529;8171  |
| Kcng4     | 1_02573_1_02573;uc009nqb.1;ge-gated channel, subfami                    | 66733  | chr8  | 1.2E+08     |
| Nell1     | 106;AK0359_1_0010379;uc009hby;usculus NEL-like 1 (Nell1),               | 338352 | chr7  | 49975349    |
| Ticrr     | 5;AK054492;NM_02983;uc012fnj.1;cting checkpoint and replication regul   |        | chr7  | 79660195    |
| E2f2      | 1_17773_1_17773;uc008vht.2 E2F transcription factor 2                   | 242705 | chr4  | 1.36E+08    |
| Casp6     | 1_00981_1_00981;uc008riq.2 usculus caspase 6 (Casp6),                   | 12368  | chr3  | 1.3E+08     |
| Slf9      | 172796;AK0;NM_172796koc.1;uc00;usculus schlafen 9 (Slf9),               | 237886 | chr11 | 12153;8298  |
| Lrrc4     | 1_13868_1_13868;uc009bcu.1;cine rich repeat containin                   | 192198 | chr6  | 28828125    |
| Rad51c    | 1204;NM_0105326;ktp.2;uc01;us RAD51 homolog C (Rad51c), mRNA            |        | chr11 | 87377606    |
| Nhlrc1    | 1_17534_1_17534;uc007qhp.2NHL repeat containing 1 (                     | 105193 | chr13 | 47012556    |
| Ptpro     | 13;NM_011164403;NMuc009emv.2 tyrosine phosphatase, re                   | 19277  | chr6  | 10720;1372  |
| Mttp      | 542;NM_00542;NM_00mw.2;uc00rosomal triglyceride trans                   | 17777  | chr3  | 1.38E+08    |
| Zfp618    | 128326;AK0;NM_028326tfm.2;uc00 zinc finger protein 618 (Z               | 72701  | chr4  | 62965573    |
| Ifitm5    | 1_05308_1_05308;uc009kiy.1 induced transmembrane                        | 73835  | chr7  | 1.41E+08    |
| Smim1     | 1;NM_001163722;NM_1;uc008waz.1mall integral membrane pi                 | 68859  | chr4  | 1.54E+08    |
| Acvr1b    | 1_00739_1_00739;uc007xsr.1ctivin A receptor, type 1B                    | 11479  | chr15 | 1.01E+08    |
| Mterfd3   | 4088;NM_01028837gld.2;uc03TERF domain containing 3                      | 74238  | chr10 | 19600;8511  |

|           |                                                                               |        |       |             |
|-----------|-------------------------------------------------------------------------------|--------|-------|-------------|
| Zfp41     | 1_011759;N759;NM_001007wgx.1;culus zinc finger protein 4                      | 22701  | chr15 | .8200;7561  |
| Arhgap36  | 1081123;BC1_0010811;tddd.1;uc001TPase activating protein 36 (Arhgap36)        |        | chrX  | '0449;4946: |
| Fam53b    | M_175268;5268;NM_10009kcf.1; sequence similarity 53, member 1                 | 77938  | chr7  | :9267;1327: |
| Aff3      | 3C052061;NM_010675uc007asu.1.F4/FMR2 family, member 3 (Aff3), member 1        |        | chr1  | ;38209552;  |
| Cdan1     | 105239;BC1_026891wu.1;uc008erythropoietic anemia, type 1                      | 68968  | chr2  | 1.21E+08    |
| Npl       | NM_028749NM_028749uc007dac.1.etylneuraminate pyruvate                         | 74091  | chr1  | 1.54E+08    |
| 1700016K1 | NM_198637NM_198637uc007key.2DNA 1700016K19 gene (1700016K1)                   | 74230  | chr11 | 75999911    |
| Dna2      | 3C030382;ANM_177372;uc007fji.2lication helicase 2 homolog (yeast) (Dna2)      |        | chr10 | ;5680;6294: |
| Gprin3    | 0199;NM_101183isd.1;uc009GPRIN family member 3 (GPRIN3)                       | 243385 | chr6  | ;3028;5935: |
| Sox18     | NM_009236NM_009236uc008ona.1x determining region Y)-box 18                    | 20672  | chr2  | 1.82E+08    |
| Rbl1      | _011249;N1249;NM_001008nor.2us retinoblastoma-like 1 (p107) (Rbl1)            |        | chr2  | 157174995   |
| Ptchd3    | 1943;NM_001029049mwf.2;uc01tched domain containing 3 (Ptchd3), member 3       |        | chr11 | 1.22E+08    |
| E2f1      | 7841;NM_001007893bnj.1;uc008ulus E2F transcription factor 1                   | 13555  | chr2  | ;2937;1545: |
| Nudt11    | NM_021431NM_021431uc009sku.1liphosphate linked moiety X)-type motif 11        |        | chrX  | 6047506     |
| Osbpl7    | 1081434;AK1_0010814ldq.1;uc00sterol binding protein-like 7 (Osbpl7), member 7 |        | chr11 | ;97050819;  |
| Slc44a3   | NM_145394NM_145394uc008rdz.2: carrier family 44, member 3                     | 213603 | chr3  | 1.21E+08    |
| Ubn2      | 9;BC044744NM_177185uc009bkh.2sculus ubinuclein 2 (Ubn2)                       | 320538 | chr6  | ;3553;3844: |
| Zranb3    | 322;NM_005678;NM_00707clg.1;uc00iger, RAN-binding domain containing 3         | 226409 | chr1  | ;7109;1279: |
| Grid1     | NM_008166NM_008166uc007tbj.1 ate receptor, ionotropic, glutamate-gated        | 14803  | chr14 | 34820135    |
| Mmd2      | NM_175217NM_175217uc009aix.1acrophage differentiation factor 2                | 75104  | chr5  | 1.43E+08    |
| AB349717  | AB349717 uc007kkx.3., oocyte_clustered_small_RNA6755, member 1                |        | chr11 | 79694888    |
| Gpr149    | NM_177346NM_177346uc008pjo.1otein-coupled receptor 149                        | 229357 | chr3  | 62529962    |
| AK003327  | AK003327 uc007apm.1length enriched library, clone:111000                      |        | chr1  | 35879844    |
| Tigd4     | NM_207278NM_207278uc008pqh.1transposable element derivative                   | 403175 | chr3  | 84593573    |
| Gm13752   | NR_040370 uc008khk.1:d gene 13752 (Gm13752), long non-coding RNA              |        | chr2  | 80391363    |
| Cacna1a   | _00125206252061;NM1009mmm.voltage-dependent, P/Q type, alpha 1C               |        | chr8  | .5363;8454: |
| Aldh1a7   | NM_011921NM_011921uc008gyn.1hydrogenase family 1, subfamily 7                 | 26358  | chr19 | 20692952    |
| Wdr76     | 151037;AK001030234ccs.1;uc01ulus WD repeat domain 76 (Wdr76)                  |        | chr2  | 1.22E+08    |
| Dmrt1     | 5;DQ53063(NM_015826uc008hbi.1d mab-3 related transcription factor 1           | 50796  | chr19 | 25505705    |
| 6720468P1 | 10306;NR_040307uc008iah.2;uc025N cDNA 6720468P15 gene (6720468P1)             |        | chr19 | ;8563;5750: |
| Palb2     | 1289844;NM_001289844ftg.2;uc012ls partner and localizer of BRCA1              | 233826 | chr7  | 122107261   |
| Ano4      | 1277188;AM_00127713frt.1;uc007 musculus anoctamin 4 (Ano4)                    |        | chr10 | ;89015603;  |
| Foxred2   | NM_001017983;NM_1017983;uc00dent oxidoreductase domain containing 2           |        | chr15 | ;2752;7794: |
| Jmjd8     | NM_028101NM_028101uc008bce.2monji domain containing 8                         | 72106  | chr17 | 25829042    |
| Exoc3l    | 1618;NM_10177789nci.1;uc009st complex component 3                             | 277978 | chr8  | 1.05E+08    |
| Wdr66     | .6965;AK030281 uc008znm.1;uc00ull=Protein Wdr66;SubName:Wdr66                 | 269701 | chr5  | ;9881;1232: |
| Rif1      | 1320;NM_101752388jqt.1;uc00teracting factor 1 homolog (yeast) (Rif1)          |        | chr2  | ;52089523;  |
| Svip      | K029831;NM_0011603;uc009hcn.1small VCP/p97-interacting protein                | 75744  | chr7  | 51997160    |
| Chic1     | NM_009767NM_009767uc009tzi.2 ine-rich hydrophobic domain containing 1         | 12212  | chrX  | 1.03E+08    |
| Faxc      | 59864;AK0010175233sdk.2;uc00n connections homolog (Drosophila) (Faxc)         |        | chr4  | 21931325    |
| Fndc7     | 1_177091;A165965;NM_10177092v.2;uc012onectin type III domain containing 7     | 320181 | chr3  | ;9319;1088: |
| Rab27a    | AF304376;NM_023635uc009qqx.1, member RAS oncogene family                      | 11891  | chr9  | ;4242;7304: |
| D330045A2 | NM_175326NM_175326uc009ukg.2DNA D330045A20 gene (D330045A2)                   | 102871 | chrX  | 1.39E+08    |
| Dach1     | 1M_001038826;NM_001038826uc007uus.2lus dachshund 1 (Drosophila) (Dach1)       |        | chr14 | ;5865;9778: |
| Rab11fip4 | NM_175545NM_175545uc007kku.1ily interacting protein 4 (Cytochrome b5 domain)  | 268451 | chr11 | 79591211    |
| E2f7      | 78609;AK0010178605xne.1;uc00E2F transcription factor 7                        | 52679  | chr10 | 1.11E+08    |
| Pla2g12a  | 196;NM_001023196;h1zq.1;uc01phospholipase A2, group XIA (Pla2g12a)            |        | chr3  | '8605;1298: |

|              |                           |                                                   |        |       |           |
|--------------|---------------------------|---------------------------------------------------|--------|-------|-----------|
| Chaf1a       | 1016;NM_013733            | assembly factor 1, subunit                        | 27221  | chr17 | 7717;5604 |
| Inmt         | NM_009349                 | thylamine N-methyltrans                           | 21743  | chr6  | 55170626  |
| 4930578G1    | AK016301                  | uc008snw.1me: Full=Protein 4930578G10Rik          |        | chr4  | 42735866  |
| Fcho1        | NM_028715                 | sculus FCH domain only 1 (Fcho1)                  |        | chr8  | 8386;7171 |
| Bfsp1        | NM_009751                 | uc011mqh.1;uc01                                   | 12075  | chr2  | 1.44E+08  |
| Tshz3        | NM_172298                 | uc009gkj.1 irt zinc finger family mem             | 243931 | chr7  | 36698117  |
| Odf1         | NM_008757                 | uc011zsh.1er dense fiber of sperm ta              | 18285  | chr15 | 38219202  |
| Pde8b        | 263;EF6441263;NM_008757   | uc011ulus phosphodiesterase 8                     | 218461 | chr13 | 95024104; |
| Srp19        | 508;NM_025527             | uc009ekh.2;uc009                                  | 66384  | chr18 | 34331144  |
| DQ727060     | DQ727060                  | uc029wec.1th enriched library, clone:4833408D1    |        | chr7  | 27821959  |
| Gstm6        | 108184;AK016301           | uc008cvy.1;uc008                                  | 14867  | chr3  | 1.08E+08  |
| Stt3a        | NM_008408                 | uc009oty.1;uc009                                  | 16430  | chr9  | 36732412  |
| Cars         | 742;NM_00742;NM_008408    | uc009kpn.2;uc009                                  | 27267  | chr7  | 1.44E+08  |
| Bdh1         | 177;AK1469177;NM_00742    | uc009yxl.2;uc009                                  | 71911  | chr16 | 31422296; |
| Tradd        | NM_0010331                | uc009nby.1;1A-associated via death c              | 71609  | chr8  | 1.05E+08  |
| Klf4         | NM_010637                 | uc008sxx.2 Kruppel-like factor 4 (gut             | 16600  | chr4  | 55527136  |
| Minos1       | 745;NM_0010331            | uc009vlu.2;uc012                                  | 433771 | chr4  | 1.39E+08  |
| Chchd2       | NM_024166                 | uc008ztn.1x-coiled-coil-helix domain              | 14004  | chr5  | 1.3E+08   |
| 2310009B146; | NM_0010331                | uc009cvw.1;uc009                                  | 69549  | chr1  | 1.39E+08  |
| Slc39a6      | NM_139143                 | uc008egv.1ily 39 (metal ion transpor              | 106957 | chr18 | 24579880  |
| 1600002K03   | NM_027207                 | uc007gcf.1 DNA 1600002K03 gene (1                 | 69770  | chr10 | 80172943  |
| Kdelr3       | NM_134096                 | uc007wto.2;uc007                                  | 105785 | chr15 | 79516407  |
| Irf1         | 08390;AY208390            | uc009wy.2;uc009                                   | 16362  | chr11 | 0013;5377 |
| Brsk1        | 8572;NM_08572;NM_08390    | uc009eyf.1;uc009                                  | 381979 | chr7  | 4690927   |
| Dbn1         | NM_001177                 | uc011yzu.1is musculus drebrin 1 (Dbn1)            |        | chr13 | 55473427  |
| Tbc1d23      | 1591;NM_026254            | uc009znd.1;uc009                                  | 67581  | chr16 | 8863;5720 |
| Tmem204      | NM_0010011                | uc008azp.1ismembrane protein 204 (                | 407831 | chr17 | 25057701  |
| Ppp1r3c      | NM_016854                 | uc008hhs.1tase 1, regulatory (inhibit             | 53412  | chr19 | 36731730  |
| Ralb         | NM_022327                 | uc007cis.2;uc007                                  | 64143  | chr1  | 1.19E+08  |
| Clic1        | NM_033444                 | uc008cfg.1loride intracellular channe             | 114584 | chr17 | 35050242  |
| Gng8         | NM_010326                 | uc009fik.1;uc009                                  | 14709  | chr7  | 16891785  |
| Mrpl52       | 1;BC028522                | uc009twa.1;uc009                                  |        | chr14 | 54426908; |
| Snx7         | 655;NM_00655;NM_00852     | uc008rdc.2;uc008                                  | 76561  | chr3  | 1.18E+08  |
| Mars2        | NM_175439                 | uc007baj.1;-tRNA synthetase 2 (mito               | 212679 | chr1  | 55237176  |
| Fam98a       | 5481;NM_133747            | uc009doq.1;uc009                                  |        | chr17 | 7085;7553 |
| Pcdh19       | 15246;NM_05246;NM_05246   | uc009ew.2;uc009                                   | 279653 | chrX  | 1.34E+08  |
| Crif2        | 15;BC01658164735;NM_00852 | uc008yph.2s cytokine receptor-like factor 2 (Crif |        | chr5  | 1.1E+08   |
| Aldh18a1     | AK134148;3554;NM_00852    | uc008hky.2;dehydrogenase 18 family, member A      |        | chr19 | 0256;4055 |
| Lgals9       | 708;NM_00708;NM_00852     | uc009kke.2;uc009                                  | 16859  | chr11 | 78962978  |
| Prss23       | NM_02961                  | uc009iga.1;uc009                                  |        | chr7  | 7784;8950 |
| Tgfb1        | NM_011577                 | uc009ftq.1;forming growth factor, be              | 21803  | chr7  | 25687001  |
| Lmna         | NM_001002                 | uc008pvj.3us musculus lamin A (Lmn                | 16905  | chr3  | 1147;8848 |
| Ppp1r3b      | BC060261;NM_177741        | uc009lkw.1tase 1, regulatory (inhibit             | 244416 | chr8  | 35376678; |
| Tmem160      | NM_026938                 | uc009fhu.1ismembrane protein 160 (                | 69094  | chr7  | 16452778  |
| Hmg20b       | NM_001163                 | uc007ghk.2;uc007                                  | 15353  | chr10 | 81346045  |
| Med21        | NM_025315                 | uc009esg.1;uc009                                  | 108098 | chr6  | 1.47E+08  |
| Atp6v0b      | NM_033617                 | uc008ujc.1ransporting, lysosomal VO               | 114143 | chr4  | 1.18E+08  |

|           |                                                                    |                                                            |        |       |              |
|-----------|--------------------------------------------------------------------|------------------------------------------------------------|--------|-------|--------------|
| AB341725  | AB341725                                                           | uc007mts.2, oocyte_clustered_small_RNA6924,                |        | chr11 | 1.21E+08     |
| Uba5      | NM_025692                                                          | NM_025692uc009rhf.2-like modifier activating e             | 66663  | chr9  | 1.04E+08     |
| Psmg7     | 289476;NM_289476;NM_118000                                         | hrv.1;uc008 (prosomes, macropain) sul                      | 26444  | chr2  | 1.8E+08      |
| Psmg4     | .0515;NM_00515;NM_00515                                            | (qbe.3;uc007 prosomes, macropain) ass                      | 69666  | chr13 | 34162963     |
| Golt1b    | NM_025872                                                          | NM_025872uc009epg.1sport 1 homolog B (S. cer               | 66964  | chr6  | 1.42E+08     |
| Uap1      | U139;AK047                                                         | NM_133802dlw.1;uc006tylglucosamine pyrophosph              | 107652 | chr1  | 12002;17014  |
| 5330426P1 | AK151508;NR_002830                                                 | uc007zla.2;30426P16 gene (5330426P16Rik), lon              |        | chr16 | 9296;50721   |
| Plcd1     | U6;JN63559                                                         | NM_019676uc012hch.1 phospholipase C, delta 1 (Plcd1), mR   |        | chr9  | 1.19E+08     |
| Nfkbib    | U10908;AY1                                                         | NM_010908fzs.1;uc006 polypeptide gene enhanc               | 18036  | chr7  | 9042;28751   |
| Derl1     | NM_024207                                                          | NM_024207uc007vsq.1-like domain family, meml               | 67819  | chr15 | 57869501     |
| Etv4      | ;NM_00881                                                          | NM_00881uc007lpw.1 e 4 (E1A enhancer bindin                | 18612  | chr11 | 101774402    |
| Gabrq     | U859;NM_0                                                          | NM_020488tkr.1;uc005butyric acid (GABA) A rec              | 57249  | chrX  | 72825435     |
| Clec2d    | NM_05310                                                           | NM_05310uc009efe.2actin domain family 2, mei               | 93694  | chr6  | 1.29E+08     |
| Baz1a     | NM_01381                                                           | NM_01381uc007nnz.2in adjacent to zinc finger               | 217578 | chr12 | 54892988     |
| Ptpcr     | U00126828                                                          | NM_0012687cvk.2;uc006 tyrosine phosphatase, receptor type  |        | chr1  | 138113563    |
| Slc35f5   | NM_028787                                                          | NM_028787uc007ckg.1 carrier family 35, membe               | 74150  | chr1  | 1.26E+08     |
| Zfp704    | U106;NM_1                                                          | NM_13321fcng.1;uc012 zinc finger protein 704 (Z            | 170753 | chr3  | 9427009      |
| Pdlim7    | AK049902;NM_026131                                                 | uc007qrg.3ulcus PDZ and LIM domain                         | 67399  | chr13 | 16772;55501  |
| Loxl2     | AK081898;NM_03332                                                  | uc029slk.1;ulus lysyl oxidase-like 2 (Lo                   | 94352  | chr14 | 69609475;    |
| Ninj1     | NM_01361                                                           | (NM_01361uc007qiw.1usculus ninjurin 1 (Ninj1),             | 18081  | chr13 | 49187546     |
| Hoxb5     | NM_00826                                                           | NM_00826uc007lbu.2ulcus homeobox B5 (Hoxb                  | 15413  | chr11 | 96303511     |
| Pdia5     | NM_02829                                                           | NM_02829uc007zbl.1 disulfide isomerase assoc               | 72599  | chr16 | 35397311     |
| Dnajb5    | U322;BC048                                                         | NM_019874som.1;uc007) homolog, subfamily B, r              | 56323  | chr4  | 10849;42951  |
| Ostc      | NM_02550                                                           | NM_02550uc008rjc.2 charyltransferase comple                | 66357  | chr3  | 1.31E+08     |
| Klf3      | U;DQ98186                                                          | (NM_008452uc008xmu.1Kruppel-like factor 3 (basi            | 16599  | chr5  | 1873;64811   |
| Cd9       | NM_00765                                                           | NM_00765uc009dun.1usculus CD9 antigen (Cd9)                | 12527  | chr6  | 1.25E+08     |
| Plac9b    | NM_20722                                                           | NM_20722uc007ssd.2us placenta specific 9b (Pl              | 211623 | chr14 | 26167317     |
| AK087886  | AK087886                                                           | uc007gwe.1y, clone:E330036K19 product:CASP2 ;              |        | chr10 | 95318246     |
| Tspan17   | U272;NM_0                                                          | NM_028841qpl.2;uc007ilus tetraspanin 17 (Tspan             | 74257  | chr13 | 54789404     |
| 2810428I1 | NM_02557                                                           | NM_02557uc009mal.1DNA 2810428I15 gene (2                   | 66462  | chr8  | 70504295     |
| Mical1    | U171779;NM_164433;NM_164433                                        | uc007monooxygenase, calponin                               | 171580 | chr10 | 176313;41471 |
| Krtcap3   | U516;NM_0                                                          | NM_027221wxx.1;uc007inocyte associated protein 3 (Krtcap3  |        | chr5  | 1705;31251   |
| Slc39a13  | U1;BC02010                                                         | (NM_026721uc008kug.1amily 39 (metal ion transp             | 68427  | chr2  | 91061790     |
| Il1rl1    | U743;NM_00025602;NM_00025602                                       | uc007us interleukin 1 receptor-l                           | 17082  | chr1  | 40439648;    |
| Rrbp1     | U81;AF27369;3626;NM_00008mqm.1us ribosome binding protein 1 (Rrbp1 |                                                            |        | chr2  | 15863;14391  |
| Med11     | NM_02539                                                           | NM_02539uc007juv.1diator complex subunit 1                 | 66172  | chr11 | 70451930     |
| Blzf1     | U00116020                                                          | NM_00116020uc007dii.2asic leucine zipper nuclea            | 66352  | chr1  | 1.64E+08     |
| Mfhas1    | U59;NM_001                                                         | NM_00108129lla.1;uc007us histiocytoma amplific             | 52065  | chr8  | 18955;35581  |
| Creg1     | U006;NM_0                                                          | NM_011804ljm.1;uc012pressor of E1A-stimulated genes 1 (C   |        | chr1  | 1.66E+08     |
| Chmp4c    | NM_02551                                                           | NM_02551uc008opu.1 multivesicular body prote               | 66371  | chr3  | 10366972     |
| Ptafr     | U399;NM_000                                                        | NM_00108129vbn.1;uc03elet-activating factor rece           | 19204  | chr4  | 19300;13251  |
| Larp6     | NM_02623                                                           | NM_02623uc009pzh.1eoprotein domain family,                 | 67557  | chr9  | 60713120     |
| Fbxl22    | NM_17520                                                           | (NM_17520uc009qex.2nd leucine-rich repeat pro              | 74165  | chr9  | 66508458     |
| Tmem238   | U29384;CCDS                                                        | NM_029384eyr.1;uc033ismembrane protein 238 (Tmem238),      |        | chr7  | 19011;47841  |
| Mpc1      | U9944;NM_C                                                         | NM_01881shao.1;uc033ochondrial pyruvate carrier 1 (Mpc1),  |        | chr17 | 8283812      |
| Map3k14   | U16896;AK0                                                         | NM_016896lua.1;uc007ated protein kinase kinase kinase 14 ( |        | chr11 | 19763;10321  |
| Nod1      | U729;NM_00729;NM_00729                                             | uc007caf.2;uc007binding oligomerization d                  | 107607 | chr6  | 54923941     |

|                    |                                                                      |        |       |             |
|--------------------|----------------------------------------------------------------------|--------|-------|-------------|
| Tars               | NM_033074;NM_033074uc007vhc.1 threonyl-tRNA synthetase               | 110960 | chr15 | 11383662    |
| Tagln              | NM_011526;NM_011526uc009pgs.2 usculus transgelin (Tagln),            | 21345  | chr9  | 45929627    |
| Hspb1              | 1388;NM_013561uc001s heat shock protein 1 (H                         | 15507  | chr5  | 1.36E+08    |
| 4833419F2NR_040328 | uc008dyg.233419F23 gene (4833419F23Rik), lon                         |        | chr18 | 4353546     |
| Ntsr1              | 1633;NM_018766uc012s neurotensin receptor 1 (                        | 18216  | chr2  | 1.8E+08     |
| Gpx4               | 1;NM_0081037741;NMuc007gbj.1;musculus glutathione peroxidase         | 625249 | chr10 | ;80047165;  |
| Ckap4              | NM_175451;NM_175451uc007gkq.1skeleton-associated prote               | 216197 | chr10 | 84526304    |
| Il21r              | 7;AK040073;NM_021887uc012ftn.1;s interleukin 21 receptor (           | 60504  | chr7  | 1.26E+08    |
| S1pr1              | 17901;CCDS;NM_007901hzh.1;uc001g sine-1-phosphate recep              | 13609  | chr3  | .1794;1157: |
| Pea15a             | NM_011063;NM_011063uc007dpy.1hoprotein enriched in asti              | 18611  | chr1  | 1.72E+08    |
| Abca7              | 1708;BC038;NM_013851;ba.1;uc007ssette, sub-family A (ABC             | 27403  | chr10 | ;80011923;  |
| Lpin3              | 18;NM_022199118;NM;uc008nrj.2mus musculus lipin 3 (Lpin:             | 64899  | chr2  | ;0669;1608: |
| Pid1               | 164328;NM_0010039;uc007bst.2 osine interaction domain                | 98496  | chr1  | ;84157128;  |
| Gabarap            | NM_019749;NM_019749uc007jtg.2 utyric acid receptor associ            | 56486  | chr11 | 69991369    |
| B2m                | NM_009735;NM_009735uc008maf.1us beta-2 microglobulin (f              | 12010  | chr2  | 1.22E+08    |
| Myl12a             | NM_026064;NM_026064uc008dlw.1hain 12A, regulatory, non               | 67268  | chr17 | 70993792    |
| Myo1g              | NM_178444;NM_178444uc007hyt.2isculus myosin IG (Myo1g)               | 246177 | chr11 | 6506547     |
| Dyrk3              | NM_145508;NM_145508uc007cmw.3sine-(Y)-phosphorylation                | 226419 | chr1  | 1.31E+08    |
| Adamts1            | NM_009621;NM_009621uc012aho.1ase (reprolysin type) with              | 11504  | chr16 | 85793827    |
| Tha1               | 1872;NM_027915;uc007us threonine aldolase 1 (Tha1), mRNA             |        | chr11 | 1.18E+08    |
| Rel                | NM_009044;NM_009044uc007ifo.1 ticuloendotheliosis oncog              | 19696  | chr11 | 23741728    |
| Bet1l              | NM_018742;NM_018742uc009kii.2 r transport 1 homolog (S.              | 54399  | chr7  | 1.41E+08    |
| Elovl1             | 1;NM_0010101039178;uc001g chain fatty acids (FEN1/l                  | 54325  | chr4  | ;8092;1184: |
| Nudt19             | NM_033080;NM_033080uc009gka.1iphosphate linked moiety                | 110959 | chr7  | 35547184    |
| Cln8               | NM_012000;NM_012000uc009kze.1 oid-lipofuscinosis, neuron             | 26889  | chr8  | 14888535    |
| Rprm1              | NM_00103321;NM_00103321uc007lvn.1;culus reprimo-like (Rprm           | 104582 | chr11 | 1.04E+08    |
| Tbcc               | NM_178385;NM_178385uc008cum.1ubulin-specific chaperone               | 72726  | chr17 | 46890620    |
| Epha2              | NM_010139;NM_010139uc008voc.2;culus Eph receptor A2 (Eph             | 13836  | chr4  | 1.41E+08    |
| Hk3                | 1;NM_001036390;NM_001036390uc007qpr.2; musculus hexokinase 3 (l      | 212032 | chr13 | 55005984    |
| Mt1                | 17262;NM_013602;uc009ulus metallothionein 1 (Mt1), mRNA              |        | chr8  | 94179088    |
| Flot1              | NM_008027;NM_008027uc008cip.1 usculus flotillin 1 (Flot1),           | 14251  | chr17 | 35823356    |
| Il2rg              | 3;AK037584;NM_013561uc033jrn.1;leukin 2 receptor, gamma chain (Il2rg |        | chrX  | ;4386;1012: |
| Smpdl3a            | NM_020561;NM_020561uc007fcu.1lin phosphodiesterase, aci              | 57319  | chr10 | 57794543    |
| Gars               | NM_180678;NM_180678uc009cai.1 s glycyl-tRNA synthetase (             | 353172 | chr6  | 55038000    |
| Nov                | NM_010930;NM_010930uc007vrn.1roblastoma overexpressed                | 18133  | chr15 | 54745927    |
| Ubtd1              | NM_145500;NM_145500uc008hmz.1iquitin domain containing               | 226122 | chr19 | 41981762    |
| Pstpip2            | AK031963;NM_013831uc008frw.1 racting protein 2 (Pstpip2), mRNA;Sul   |        | chr18 | ;4549;7778: |
| Trmt61b            | 15549;AK004123;NM_0121awu.1;uc001 tRNA methyltransferase 61B (Trmt61 |        | chr17 | ;8514;7155: |
| Uso1               | NM_019490;NM_019490uc008ycl.1JSO1 vesicle docking factor (Uso1), m   |        | chr5  | ;4011;9213: |
| Ndufb2             | 126612;AK012661;md.1;uc009nase (ubiquinone) 1 beta                   | 68198  | chr6  | 39592582    |
| Cope               | 1279;NM_021539;uc001r protein complex, subuni                        | 59042  | chr8  | 70302784    |
| Vegfa              | 3146;NM_00111021;uc008sacular endothelial growth factor A (V         |        | chr17 | ;46025210;  |
| Shmt2              | 252316;NM_0252316;NM_0252316;uc001roxymethyltransferase 2            | 108037 | chr10 | 1.28E+08    |
| Gm10653            | NR_003965 uc012gus.1cted gene 10653 (Gm10653), non-coc               |        | chr9  | 62841476    |
| Fbxo6              | NM_001163;NM_001163uc008vuf.1 usculus F-box protein 6 (l             | 50762  | chr4  | 1.48E+08    |
| Sap30              | NM_021788;NM_021788uc009lsu.2 n3 associated polypeptide              | 60406  | chr8  | 57482701    |
| Ccr2               | NM_009911;NM_009911uc009shc.1;mokine (C-C motif) recept              | 12772  | chr9  | ;5684;1241: |

|            |                                                                                                 |        |       |             |
|------------|-------------------------------------------------------------------------------------------------|--------|-------|-------------|
| Adam1a     | NM_172126;NM_172126;uc008zjo.1; and metalloproteinase domain 1 (Adam1a)                         | 280668 | chr5  | 1.22E+08    |
| Cldn11     | NM_008777;NM_008777;uc008ovw.2; sculus claudin 11 (Cldn11)                                      | 18417  | chr3  | 31149919    |
| Dbil5      | 5062;NM_C;NM_021297;7kfk.1;uc03;epam binding inhibitor-like 5 (Dbil5)                           | 13168  | chr11 | 7612;7621;  |
| Hebp1      | NM_013546;NM_013546;uc009elh.1; heme binding protein 1 (Hebp1)                                  | 15199  | chr6  | 1.35E+08    |
| Cox6a1     | NM_007748;NM_007748;uc008zdt.1; c oxidase subunit VIa polypeptide chain 6A (Cox6a1)             | 12861  | chr5  | 1.15E+08    |
| Gm4013     | NR_033452 uc008etq.2;ted gene 4013 (Gm4013), long non-coding RNA (Gm4013)                       |        | chr18 | 42274379    |
| Sec61g     | NM_001109;NM_001109;uc011xrs.1;ulus SEC61, gamma subunit (Sec61g)                               | 20335  | chr11 | 16501637    |
| AK050516   | AK050516 uc007mzr.1;RIKEN full-length enriched library, clone AK050516                          |        | chr12 | 8511200     |
| Nt5c       | NM_015807;NM_015807;uc007mhu.5;3'-nucleotidase, cytosolic (Nt5c)                                | 50773  | chr11 | 1.15E+08    |
| Mlkl       | I29005;AK0;NM_029005;me.1;uc005ed lineage kinase domain (Mlkl)                                  | 74568  | chr8  | 1.11E+08    |
| Ero1l      | NM_015774;NM_015774;uc007tgm.2; ERO1-like (S. cerevisiae) (Ero1l)                               | 50527  | chr14 | 45283086    |
| Gm11974    | I2548;NR_045893;uc029rkn.1;uc007ad gene 11974 (Gm11974), long non-coding RNA (Gm11974)          |        | chr11 | 6525590     |
| Ptpn18     | I11206;AK0;NM_011206;aos.1;uc007he phosphatase, non-receptor type 18 (Ptpn18)                   |        | chr1  | 2735;3445;  |
| Golim4     | 75193;AK0;NM_175193;jni.1;uc008bgi integral membrane protein 4 (Golim4)                         | 73124  | chr3  | 75876383;   |
| Mrpl54     | NM_025317;NM_025317;uc007ggy.1;ondrial ribosomal protein L54 (Mrpl54)                           | 66047  | chr10 | 81264721    |
| 2410004N09 | I8151;NR_038152;uc008ejv.2;uc029N cDNA 2410004N09 gene (2410004N09)                             |        | chr18 | 33794891    |
| Ocel1      | I29865;AK1;NM_029865;ncu.2;uc007udin/ELL domain containing protein 1 (Ocel1)                    | 77090  | chr8  | 71371297    |
| Ift20      | IY082613;NM_018854;uc007kjt.1; intraflagellar transport 20 (Ift20)                              | 55978  | chr11 | 78536435    |
| Pam16      | NM_025571;NM_025571;uc007xzx.1; e-associated motor 16 homolog (Pam16)                           | 66449  | chr16 | 4616465     |
| Selp       | I335;NM_0;NM_011347;dhz.2;uc03;ulus selectin, platelet (Selp), mRNA                             |        | chr1  | 4704;1641;  |
| Rtn4       | NM_194054;NM_194054;uc007ihn.2s musculus reticulon 4 (Rtn4)                                     | 68585  | chr11 | 29693773;   |
| Emilin2    | 45158;AK1;NM_145158;mf.1;uc008stin microfibril interfacial protein 2 (Emilin2)                  | 246707 | chr17 | 71252175    |
| Tnfrsf1b   | NM_011611;NM_011611;uc008vrt.1;actor receptor superfamily member 1b (Tnfrsf1b)                  | 21938  | chr4  | 1.45E+08    |
| Gmip       | NM_198101;NM_198101;uc009lxu.1; Gem-interacting protein (Gmip)                                  | 78816  | chr8  | 69808686    |
| Arhgdib    | I07486;AK0;NM_007486;mo.1;uc009 dissociation inhibitor (GDI) beta (Arhgdib)                     | 11857  | chr6  | 1.37E+08    |
| Nfkbia     | NM_010907;NM_010907;uc007nor.2; polypeptide gene enhancer in C. elegans (Nfkbia)                | 18035  | chr12 | 55489408    |
| Tmem208    | NM_025486;NM_025486;uc009ncs.2;ismembrane protein 208 (Tmem208)                                 | 66320  | chr8  | 1.05E+08    |
| Sec23a     | NM_009147;NM_009147;uc007npw.1; SEC23A (S. cerevisiae) (Sec23a)                                 | 20334  | chr12 | 58958383    |
| Tpgs1      | NM_148934;NM_148934;uc007fzh.1; olyglutamylase complex subunit 1 (Tpgs1)                        | 110012 | chr10 | 79669409    |
| Arl4c      | I77305;BC0;NM_177305;woz.1;uc007P-ribosylation factor-like protein 4 (Arl4c)                    | 320982 | chr1  | 18225;8867; |
| Folr1      | I4;BC002072;52554;NM;uc009ipo.2;ulus folate receptor 1 (adult) (Folr1)                          | 14275  | chr7  | 1.02E+08    |
| Sf3b5      | NM_175102;NM_175102;uc007eki.2; plicing factor 3b, subunit 5 (Sf3b5)                            | 66125  | chr10 | 13008449    |
| Cd7        | NM_009854;NM_009854;uc007mvc.2;sculus CD7 antigen (Cd7)                                         | 12516  | chr11 | 1.21E+08    |
| Crip1      | NM_007763;NM_007763;uc007pfz.1;eine-rich protein 1 (intestine) (Crip1)                          | 12925  | chr12 | 1.13E+08    |
| Sp100      | I0004;CT01;NM_013673;juh.1;uc007s nuclear antigen Sp100 (Sp100)                                 | 20684  | chr1  | 85650049    |
| Gjc2       | CCDS24760;5452;NM;uc033fvv.1s gap junction protein, gamma 2 (Gjc2)                              | 118454 | chr11 | 76331;5917; |
| Cyb561     | I978;NM_0;NM_007805;7lxs.1;uc007us cytochrome b-561 (Cyb561), mRNA                              |        | chr11 | 1.06E+08    |
| Btg3       | 7662;NR_0;NM_009777;cahh.1;uc007B cell translocation gene 3 (Btg3)                              | 12228  | chr16 | 78359859    |
| Sec61b     | NM_024171;NM_024171;uc008sur.1;us Sec61 beta subunit (Sec61b)                                   | 66212  | chr4  | 47474660    |
| Eif6       | I313;NM_0;NM_010579;uhr.1;uc007otic translation initiation factor 6 (Eif6)                      | 16418  | chr2  | 9836;1558;  |
| Crybb3     | K053552;N352;NM_00;uc012ebl.1;sculus crystallin, beta B3 (Crybb3)                               | 12962  | chr5  | 7023;1130;  |
| Npdc1      | I08721;BC0;NM_008721;birx.2;uc007eration, differentiation and control 1 (Npdc1)                 |        | chr2  | 13049;2540; |
| Ostf1      | NM_017375;NM_017375;uc008gxs.2;teoclast stimulating factor 1 (Ostf1)                            | 20409  | chr19 | 18580363    |
| 2410006H16 | I7519;NR_030738 uc007jjl.1;uc00710006H16 gene (2410006H16Rik), long non-coding RNA (2410006H16) |        | chr11 | 62602876    |
| Ftl1       | I960;NM_0;NM_010240;gvf.1;uc007ilus ferritin light chain 1 (Ftl1)                               | 14325  | chr7  | 45457943    |
| Krt8       | NM_031171;NM_031171;uc007xui.1;nusculus keratin 8 (Krt8), isoform 1 (Krt8)                      | 16691  | chr15 | 1.02E+08    |
| Srm        | NM_009272;NM_009272;uc008vuw.1;lus spermidine synthase (Srm)                                    | 20810  | chr4  | 1.49E+08    |

|            |                                 |                                                |        |       |           |
|------------|---------------------------------|------------------------------------------------|--------|-------|-----------|
| Fam210b    | NM_025912;NM_025912;uc012ckn.1  | sequence similarity 210, m                     | 67017  | chr2  | 1.72E+08  |
| Ssr4       | 166480;NM166480;NM              | tms.2;uc00's signal sequence recepto           | 20832  | chrX  | 73787027  |
| 8030411F24 | 532;NM_0;NM_030135;ntm.1;uc01   | DNA 8030411F24 gene (8030411F24)               |        | chr2  | 1.49E+08  |
| Chst7      | 21715;CCDS;NM_021713;joq.1;uc00 | N-acetylglucosamino) sulfotransferas           |        | chrX  | 9569;2005 |
| Fam114a1   | 1499;NM_0;NM_026667;wn.1;uc01   | 2quence similarity 114, member A1 (F           |        | chr5  | 64970074  |
| Mthfd2     | NM_008638;NM_008638;uc009cne.2  | se (NAD+ dependent), me                        | 17768  | chr6  | 83305703  |
| Slc35a2    | K008095;N1484;NM_00uc009snb.1   | ily 35 (UDP-galactose tra                      | 22232  | chrX  | 5748;7884 |
| Golgb1     | 3C145221;ENM_030035;uc007zdh.2  | gen, golgin subfamily b, macrogolgin           |        | chr16 | 5201;3688 |
| Rcn1       | NM_009037;NM_009037;uc008lks.1  | culus reticulocalbin 1 (Rcn                    | 19672  | chr2  | 1.05E+08  |
| Trim7      | 188;NM_0;NM_053166;xy.1;uc00    | ipartite motif-containing                      | 94089  | chr11 | 7470;4882 |
| Dpt        | NM_019759;NM_019759;uc007diq.1  | culus dermatopontin (Dp                        | 56429  | chr1  | 1.65E+08  |
| Myzap      | N_0010332;N_0010332;uc009qpa.1  | rdial zonula adherens pro                      | 102371 | chr9  | 71504346  |
| Ly9        | N_0012779534;NM_00;uc033fnx.1   | culus lymphocyte antigen 9 (Ly9)               |        | chr1  | 1.72E+08  |
| Fam83g     | 7262;NM_1;NM_178618;7jic.1;uc00 | member G (Fam83g), mRN                         | 69640  | chr11 | 4409;6168 |
| Myo1b      | 346;AK0537863;NM_00axv.2;uc025  | musculus myosin IB (Myo                        | 17912  | chr1  | 51749765; |
| Vamp5      | 080742;NM080742;NM              | ncil.2;uc009cle-associated membrane            | 53620  | chr6  | 72368048  |
| Csf1r      | 99;AK17154;N_0010378fbn.1;uc01  | 2y stimulating factor 1 receptor (Csf1r        |        | chr18 | 5780;6110 |
| Tuba1a     | NM_011655;NM_011655;uc007xok.1  | lus tubulin, alpha 1A (Tub                     | 22142  | chr15 | 98949846  |
| Slc7a6     | 127;BC042;NM_178798;nf.1;uc00   | onic amino acid transporter, y+ syste          |        | chr8  | 106189112 |
| Birc3      | 097;NM_0;NM_007464;dd.2;uc00    | loviral IAP repeat-containing 3 (Birc3)        |        | chr9  | 7857173;7 |
| Anxa1      | NM_01073;NM_01073;uc008gyi.1    | culus annexin A1 (Anxa1                        | 16952  | chr19 | 20373433  |
| Gorasp2    | 27343;BC0;NM_027352;zn.2;uc00   | lgi reassembly stacking pr                     | 70231  | chr2  | 2896;7066 |
| Vcam1      | 465;NM_0;NM_011693;rbx.1;uc00   | ular cell adhesion molecule 1 (Vcam1)          |        | chr3  | 3435;1161 |
| Srpr       | 860;NM_0;NM_026130;osz.1;uc00   | tion particle receptor ('dc                    | 67398  | chr9  | 2711;3521 |
| Gabrb1     | NM_008069;NM_008069;uc008xrb.1  | ric acid (GABA) A recepto                      | 14400  | chr5  | 71700015  |
| Stx3       | 5307;NM_(5307;NM_)gsz.1;uc00    | 8s musculus syntaxin 3 (Stx3)                  |        | chr19 | 7484;1177 |
| Esd        | 285423;NM285423;NM              | uqd.2;uc00terase D/formylglutathion            | 13885  | chr14 | 74732296  |
| Rhoc       | NM_007484;NM_007484;uc008qul.2  | omolog gene family, mem                        | 11853  | chr3  | 1.05E+08  |
| Ccdc69     | 77471;BC0;NM_177477;iyv.1;uc00  | id-coil domain containing                      | 52570  | chr11 | 0729;5504 |
| Tmem37     | NM_019432;NM_019432;uc007cjd.1  | nsmembrane protein 37 (                        | 170706 | chr1  | 1.2E+08   |
| Tppp3      | NM_026481;NM_026481;uc009ndc.2  | ation-promoting protein f                      | 67971  | chr8  | 1.05E+08  |
| Akr1c13    | NM_013778;NM_013778;uc007pj.2   | eductase family 1, memk                        | 27384  | chr13 | 4191186   |
| Plk3       | 013807;U2;NM_013807;dj.1;uc00   | ulus polo-like kinase 3 (Pl                    | 12795  | chr4  | 1.17E+08  |
| Eif4ebp1   | NM_007918;NM_007918;uc009lih.1  | ion initiation factor 4E bir                   | 13685  | chr8  | 27260326  |
| 2310039H   | 02596;NM_02596;uc008cui.1       | DNA 2310039H08 gene (2                         | 67101  | chr17 | 46772634  |
| Tmem150    | 646;BC062;NM_182841;yhf.1;uc00  | 8membrane protein 150C                         | 231503 | chr5  | 7872;1000 |
| Glipr1     | NM_028608;NM_028608;uc007haj.2  | athogenesis-related 1 (glic                    | 73690  | chr10 | 1.12E+08  |
| Sec13      | NM_024206;NM_024206;uc009dhm.1  | C13 homolog (S. cerevisia                      | 110379 | chr6  | 1.14E+08  |
| Rin1       | NM_145495;NM_145495;uc008gca.1  | Ras and Rab interactor 1                       | 225870 | chr19 | 5050807   |
| Sars       | 79;AK14782204979;NM             | uc008qza.2 seryl-aminoacyl-tRNA synthetase (Sa |        | chr3  | 4396;1084 |
| Fam46a     | 0378;NM_(0378;NM_)gxn.1;uc00    | s with sequence similarity 4                   | 212943 | chr9  | 85320438  |
| Dok5       | 163686;NM163686;NM              | bcg.2;uc012usculus docking protein 5           | 76829  | chr2  | 1.71E+08  |
| Atp11a     | 3C145399;B;NM_015804;uc009kwj.2 | TPase, class VI, type 11A                      | 50770  | chr8  | 12757015  |
| Ece2       | 145126;NM;NM_17794;uc007yqh.1   | endothelin converting enzyme 2 (Ecc            |        | chr16 | 20611600; |
| Nfkbiz     | NM_001159;NM_001159;uc007zlo.2  | light polypeptide gene en                      | 80859  | chr16 | 55811376  |
| Cd37       | 54466;AK1;NM_007649;gui.1;uc00  | musculus CD37 antigen (C                       | 12493  | chr7  | 45233631; |
| Acbd3      | NM_133225;NM_133225;uc007dwq.2  | yme A binding domain co                        | 170760 | chr1  | 1.81E+08  |



|           |                                                                        |                                                         |        |       |            |
|-----------|------------------------------------------------------------------------|---------------------------------------------------------|--------|-------|------------|
| Rexo2     | 1202;NM_01024233                                                       | lipin 1;uc009xonuclease 2 homolog (S                    | 104444 | chr9  | 13490;4846 |
| Herpud1   | 122331;AK01022331                                                      | hwg.1;uc009reticulum stress-inducibl                    | 64209  | chr8  | 94386499   |
| Fkbp11    | 9;BC022900                                                             | NM_024165uc007xnn.1;K506 binding protein 11 (Fkbp11), m |        | chr15 | 16814;9872 |
| Adamts14  | 106;NM_0010010811                                                      | hes.1;uc009se (reprolysin type) with thrombospor        |        | chr10 | 61197111   |
| Copb2     | 101582;NM_015821                                                       | uc009rdm.1in complex, subunit beta                      | 50797  | chr9  | 98563730   |
| Jun       | 101059;NM_010591                                                       | uc008tsq.2ilus jun proto-oncogene (J                    | 16476  | chr4  | 95049035   |
| AK077474  | AK077474                                                               | uc009rdl.1;th enriched library, clone:5730419C0         |        | chr9  | 98562228   |
| Sec24d    | 10981;NM_01027135                                                      | exb.1;uc009gene family, member D (S                     | 69608  | chr3  | 19144;1232 |
| 5430435G2 | 14550;NM_145501                                                        | uc007cnp.1DNA 5430435G22 gene (5430435G22               |        | chr1  | 1.32E+08   |
| Pgm1      | 102570;NM_025701                                                       | uc008xmi.1; phosphoglucomutase 1 (                      | 66681  | chr5  | 64092949   |
| Wnt2b     | 100952;NM_009521                                                       | uc008qut.1related MMTV integrator                       | 22414  | chr3  | 1.05E+08   |
| Tfrc      | 101163;NM_011631                                                       | uc007yzb.2ilus transferrin receptor (T                  | 22042  | chr16 | 14441;3260 |
| Rras      | 100910;NM_009101                                                       | uc009gss.1rat sarcoma oncogene, su                      | 20130  | chr7  | 45018006   |
| Tbrg1     | 102528;NM_025281                                                       | uc009ovh.1; growth factor beta regul                    | 21376  | chr9  | 37649181   |
| Mapkapk3  | 1178;AK170456                                                          | 17890;uc009rky.1;rotein kinase-activated pi             | 102626 | chr9  | 19554;1072 |
| Arhgef6   | 13019723;NM_152801                                                     | uc009the.1;ine nucleotide exchange f                    | 73341  | chrX  | 157272229; |
| Pawr      | 154056;DQ41054051                                                      | xnd.1;uc009C, apoptosis, WT1, regulator (Pawr),         |        | chr10 | 12687;1083 |
| Elovl7    | 129001;AK01029001                                                      | rva.2;uc009r 7, elongation of long cha                  | 74559  | chr13 | 1.08E+08   |
| H2afj     | 117768;NM_177681                                                       | uc009eme.1A histone family, membe                       | 232440 | chr6  | 1.37E+08   |
| Vat1      | 1178;NM_01020371                                                       | loz.1;uc009ransport protein 1 homolog (T californ       |        | chr11 | 18747;1014 |
| Pafah2    | 1001285;NM_001285                                                      | uc008vey.3;let-activating factor acetyl                 | 100163 | chr4  | 17470;1343 |
| Spty2d1   | 117531;NM_175311                                                       | uc009gzx.2of Ty, domain containing :                    | 101685 | chr7  | 46990395   |
| Tnfsf13   | 1517;NM_005171;NM_007jrd.1;uc009osis factor (ligand) superfamily, memk |                                                         |        | chr11 | 69682576   |
| Tbxas1    | 185414;AK11011531                                                      | 9blc.1;uc009boxane A synthase 1, platelet (Tbxas        |        | chr6  | 138983309; |
| Slc1a5    | 100920;NM_009201                                                       | uc009fib.1.1 (neutral amino acid tran                   | 20514  | chr7  | 16781345   |
| Slc37a1   | 1001242;D62;NM_001008buy.1                                             | r 37 (glycerol-3-phosphate                              | 224674 | chr17 | 131295482; |
| Rcn3      | 126555;BC01026551                                                      | gta.3;uc009in 3, EF-hand calcium bin                    | 52377  | chr7  | 45082913   |
| Lcp2      | 110696;AK010691                                                        | 7ikv.1;uc009mphocyte cytosolic protei                   | 16822  | chr11 | 34047200   |
| Stambpl1  | 110122;AK01029681                                                      | zhgc.1;uc029NM binding protein like 1 (Stambpl1),       |        | chr19 | 12624;3419 |
| Zhx2      | 17483;NM_119944                                                        | 1vsps.1;uc039ic fingers and homeoboxes 2 (Zhx2), r      |        | chr15 | 11236;5769 |
| Map1b     | 1157749;NM_008631                                                      | uc007rpt.2;tubule-associated protein 1B (Map1k          |        | chr13 | 199429211; |
| Mfap5     | 101577;NM_015771                                                       | uc009dpi.1ofibrillar associated prote                   | 50530  | chr6  | 1.23E+08   |
| AK076318  | AK076318                                                               | uc009nwn.1;th enriched library, clone:4732419C:         |        | chr8  | 1.24E+08   |
| Chst4     | 12659;NM_10119981                                                      | 3jhr.1;uc009chondroitin 6/keratan) sul                  | 26887  | chr8  | 19074;1100 |
| Gm10941   | NR_026944                                                              | uc007fvi.2:d gene 10941 (Gm10941), long non-c           |        | chr10 | 77257772   |
| Dapp1     | 10584;NM_011931                                                        | 7mt.1;uc009hosphotyrosine and 3-phc                     | 26377  | chr3  | 1.38E+08   |
| Samd4     | 1163751;NM_028961                                                      | uc007thp.1ile alpha motif domain co                     | 74480  | chr14 | 14174;4688 |
| C6        | 116704;AK010670                                                        | zqw.1;uc009complement component                         | 12274  | chr15 | 4727209    |
| Tfpi2     | 100936;NM_009361                                                       | uc009avh.1ue factor pathway inhibiti                    | 21789  | chr6  | 3962594    |
| Efnb2     | 101011;NM_010111                                                       | uc009kue.1usculus ephrin B2 (Efnb2),                    | 13642  | chr8  | 8617438    |
| Rorc      | 10941;NM_011281                                                        | 2ctn.1;uc009related orphan receptor g                   | 19885  | chr3  | 17459;9437 |
| Gmppb     | 117791;NM_177911                                                       | uc009rog.1annose pyrophosphoryla                        | 331026 | chr9  | 1.08E+08   |
| Lgmn      | 1104;NM_011171                                                         | 5oue.1;uc009usculus legumain (Lgmn),                    | 19141  | chr12 | 1.02E+08   |
| Ctss      | 1281;NM_002811;NM_001qjz.3;uc009s musculus cathepsin S (C              |                                                         | 13040  | chr3  | 95526785   |
| Zfp456    | 10010011;NM_0010011                                                    | uc007rar.1. zinc finger protein 456 (Z                  | 408065 | chr13 | 67363583   |
| Maats1    | 143;NM_0010010810                                                      | 7zer.1;uc009-associated, testis expressed 1 (Maat       |        | chr16 | 17753;3833 |
| Ankrd61   | 102573;NM_025731                                                       | uc009akv.1kyrin repeat domain 61 (                      | 66729  | chr5  | 1.44E+08   |

|          |                                                                         |        |       |             |
|----------|-------------------------------------------------------------------------|--------|-------|-------------|
| Slc25a33 | NM_02746(NM_02746uc008vxe.1carrier family 25, member                    | 70556  | chr4  | 1.5E+08     |
| S100a13  | NM_00911(NM_00911uc008qcu.2calcium binding protein A                    | 20196  | chr3  | 90514434    |
| 9630014M | AK035890 uc008esm.1ne: Full=Protein 9630014M24Rik                       |        | chr18 | 38601533    |
| Ogfod2   | 3946;NM_0(NM_025671zoy.1;uc008n-dependent oxygenase (                   | 66627  | chr5  | 1.24E+08    |
| Usp43    | 4;AK04733(NM_173754uc007jne.1; ubiquitin specific peptidase 43 (Usp4    |        | chr11 | 67854522    |
| Tmem62   | 3C049167;NM_175285uc012ccj.1nsmembrane protein 62 (Tmem62), r           |        | chr2  | '7630;1209' |
| Tubb2a   | NM_00945(NM_00945uc007qbb.3ubulin, beta 2A class IIA (                  | 22151  | chr13 | 34074279    |
| Sec22b   | NM_011342(NM_011342uc008qpj.1fficking protein homolog f                 | 20333  | chr3  | 97901226    |
| Cib1     | 3450;NM_0(NM_011870hzt.1;uc008cium and integrin binding                 | 23991  | chr7  | 80227159    |
| Fam83b   | 1045518;AK100104551qtc.1;uc008sequence similarity 83, m                 | 208994 | chr9  | 76490704    |
| Arl1     | NM_02585(NM_02585uc007grw.1DP-ribosylation factor-like                  | 104303 | chr10 | 88731413    |
| Clec4n   | ;NM_0011(NM_001190321esk.1;uc008e lectin domain family 4,               | 56620  | chr6  | :9856;1232: |
| Phospho1 | 53104;AK103104;NM_7las.2;uc008hosphatase, orphan 1 (Ph                  | 237928 | chr11 | :4499;9571: |
| 1810043H | (NM_0011102(NM_0011102uc007mru.2DNA 1810043H04 gene (1                  | 208501 | chr11 | 1.2E+08     |
| Tspo     | NM_00977(NM_00977uc007xbg.2lus translocator protein (T                  | 12257  | chr15 | 83563572    |
| Mrgprx2  | 53;NM_001(NM_0010348har.2;uc008S-related GPR, member X2 (Mrgprx2),      |        | chr7  | :0625;4847: |
| Rabac1   | 3109;NM_0(NM_010263frd.1;uc008b acceptor 1 (prenylated)                 | 14470  | chr7  | 24969749    |
| Cd52     | NM_01370(NM_01370uc008vea.2sculus CD52 antigen (Cd52                    | 23833  | chr4  | 1.34E+08    |
| Nfil3    | ;CCDS2651(NM_017373uc007qni.1;ir factor, interleukin 3, regulated (Nfil |        | chr13 | :7477;5296' |
| Igfbp5   | 10518;BC0(NM_010518bkx.1;uc028) product:unclassifiable, full insert sec |        | chr1  | :8064;7285: |
| Bspry    | NM_13865(NM_13865uc008tex.1;x and SPRY domain contai                    | 192120 | chr4  | 62480066    |
| Fbxo2    | NM_17684(NM_17684uc008vuk.1ulus F-box protein 2 (Fbxc                   | 230904 | chr4  | 1.48E+08    |
| Gmfg     | K153228;N024;NM_00uc009fyy.1s glia maturation factor, gamma (Gmf        |        | chr7  | ;28437446;  |
| Plk2     | 3452;NM_1(NM_152807rvr.1;uc008ulus polo-like kinase 2 (Plk              | 20620  | chr13 | :5047;1103: |
| Uqcrc    | 3160;NM_0(NM_025357ivy.2;uc008irome c reductase, compl                  | 22272  | chr11 | 53428947    |
| Itga6    | M_001277397;NM_00uc008kbd.2nusculus integrin alpha 6 (                  | 16403  | chr2  | ;71786938;  |
| Vmo1     | M_0010136(M_0010136 uc007jvc.1 brane outer layer 1 homo                 | 327956 | chr11 | 70513515    |
| Tspan18  | AK171054;NM_18318(NM_18318uc033hom.1ulus tetraspanin 18 (Tspan18), mRNA |        | chr2  | ;93291835;  |
| Mgam     | 32;NM_001(M_0011710iow.1;uc008s maltase-glucoamylase (M                 | 232714 | chr6  | ;40628830;  |
| Cxadr    | NM_00998(NM_00998uc007zso.2sackie virus and adenoviru                   | 13052  | chr16 | 78301670    |
| Lpar3    | NM_02298(NM_02298uc008rra.2hosphatidic acid receptc                     | 65086  | chr3  | 1.46E+08    |
| Odc1     | NM_01361(NM_01361uc007ncv.1ine decarboxylase, struct                    | 18263  | chr12 | 17544872    |
| Igsf3    | NM_20720(NM_20720uc008qrg.2oglobulin superfamily, me                    | 78908  | chr3  | 1.01E+08    |
| Syt7     | NM_01880(NM_01880uc012bin.1 usculus synaptotagmin VI                    | 54525  | chr19 | 10389089    |
| Gdpd5    | 3443;NM_2(NM_2013529ilp.1;uc008ster phosphodiesterase domain conta      |        | chr7  | :8838;9938: |
| Hist1h4i | NM_17565(NM_17565uc007psc.1 histone cluster 1, H4i (Hi                  | 69386  | chr13 | 22040815    |
| Tubb2b   | NM_02371(NM_02371uc007qbd.1ubulin, beta 2B class IIB (                  | 73710  | chr13 | 34127007    |
| Fxyd5    | 3;BC03111111073;NM;uc009gho.ain-containing ion transj                   | 18301  | chr7  | :2722;3103: |
| Fam131c  | M_0010855(M_0010855uc008vod.2equence similarity 131, m                  | 277743 | chr4  | 1.41E+08    |
| Asic2    | 034013;NM034013;NM:ml.2;uc007-sensing (proton-gated) ic                 | 11418  | chr11 | 80880162    |
| Anxa3    | NM_01347(NM_01347uc008yfl.2; sculus annexin A3 (Anxa3), mRNA            |        | chr5  | :3384;9681: |
| Furin    | 046;NM_00046;NM_009iau.1;uc008aired basic amino acid cle                | 18550  | chr7  | 80389193    |
| Hmga1    | .76;NM_00176;NM_009anz.1;uc008 high mobility group AT-h                 | 15361  | chr17 | :6573;2755: |
| Frat1    | NM_00804(NM_00804uc008hmi.2arranged in advanced T cell lymphom          |        | chr19 | 41829969    |
| Nxn12    | NM_02917(NM_02917uc007qme.1us nucleoredoxin-like 2 (N                   | 75124  | chr13 | 51171024    |
| Sema5a   | 09154;AK0(NM_009154vkp.1;uc0081-like), transmembrane domain (TM)        |        | chr15 | :1674;3224: |
| Itgbl1   | 1773;NM_1(NM_145467zqq.1;uc008us integrin, beta-like 1 (Itgbl1), mRNA   |        | chr14 | 1.24E+08    |

|          |                                                                          |        |       |              |
|----------|--------------------------------------------------------------------------|--------|-------|--------------|
| Filip1l  | CCDS49877.7871;NM_001027822.2;ilamin A interacting prote                 | 78749  | chr16 | ;57549241;   |
| Ctla2b   | 145801;NM_0145801.1;NM_001027822.2;uc007.2; T lymphocyte-associated      | 13025  | chr13 | 60895350     |
| Snx10    | NM_028035;NM_028035;uc009bxt.1;musculus sorting nexin 10 (               | 71982  | chr6  | ;3902;5154;  |
| Ppp1r35  | NM_027242;NM_027242;uc009adx.1;phosphatase 1, regulatory su              | 69871  | chr5  | 1.38E+08     |
| 18100320 | (NR_027819;NM_014782.2;uc007mlz.2 N cDNA 1810032008 gene (18100320       |        | chr11 | 1.17E+08     |
| AI413582 | 1002895;AKM_0010028bpf.1;uc008essed sequence AI413582 (AI413582)         |        | chr17 | ;3768;2756;  |
| Clec4a2  | NM_001117;NM_001117;uc009dqb.2;lectin domain family 4, r                 | 26888  | chr6  | ;3315;1231;  |
| Tgm2     | 09373;AK0;NM_009373;npr.1;uc008glutaminase 2, C polypeptide (Tgm2)       |        | chr2  | ;0379;1581;  |
| Xbp1     | '30;BC0160342;NM_001007hwn.2;musculus X-box binding protein 1 (Xbp1)     |        | chr11 | ;4238;5520;  |
| Daam1    | 64;BC048851;NM_0012864nuz.2;uc007d associated activator of n             | 208846 | chr12 | ;71831067;   |
| Arf4     | NM_007479;NM_007479;uc007sta.1. ADP-ribosylation factor 4                | 11843  | chr14 | 26638196     |
| Tlr4     | NM_021297;NM_021297;uc008thv.1;musculus toll-like receptor 4 (Tl         | 21898  | chr4  | 66827810     |
| Prr13    | 4;NM_0253385;NM_00100xvr.2;uc007musculus proline rich 13 (f              | 66151  | chr15 | 102459231    |
| Tmsb4x   | NM_021278;NM_021278;uc009uwx.1;osin, beta 4, X chromosor                 | 19241  | chrX  | 1.67E+08     |
| Tsku     | BC129978;M8540;NM_001009iki.2;musculus musculus tsukushi (Tsku)          |        | chr7  | ;2057;9835;  |
| Pex5l    | _00116351;289505;NM_001008owu.1;peroxisomal biogenesis factor 5-like (P  |        | chr3  | ;32949633;   |
| Flnb     | NM_134080;NM_134080;uc007sek.1;musculus filamin, beta (Flnb)             | 286940 | chr14 | .7956;7919;  |
| Srgap1   | ;AK016279;1037;NM_001007hgc.2;OBO Rho GTPase activating protein 1        |        | chr10 | 1.22E+08     |
| Arl11    | 77337;CCDS;NM_177337ufu.1;uc003P-ribosylation factor-like 11 (Arl11), r  |        | chr14 | .0742;6130;  |
| Runx2    | 073392;NM_0271630;NM_00100cqc.3;uc008unt related transcription f         | 12393  | chr17 | ;3988;4463;  |
| Nfam1    | NM_001271;NM_001271;uc007wzu.2;activating molecule with ITAM motif 1     |        | chr15 | 82996735     |
| Lrat     | NM_023624;NM_023624;uc012cqv.1;rase (phosphatidylcholine                 | 79235  | chr3  | 82892581     |
| Chsy3    | M_0010813;M_0010813;uc008ezv.1;ondroitin sulfate synthase 3 (Chsy3), r   |        | chr18 | '5339;5917'; |
| Coq10b   | 039710;NM_039710;NM_00100mazz.1;uc007zyme Q10 homolog B (S. c            | 67876  | chr1  | 55052769     |
| Fam83h   | 168253;NM_0168253;NM_00100wic.2;uc007with sequence similarity 8:         | 105732 | chr15 | 76001091     |
| Timm10b  | 4;AK131168;NM_019502;uc009iyt.1; inner mitochondrial mem                 | 14356  | chr7  | ;0539;1056;  |
| Rhbdd1   | 122685;NM_0122685;NM_00100brq.3;uc007rhomboid domain contain             | 76867  | chr1  | ;9048;8231;  |
| Mitf     | 08601;BC1;NM_008601dba.2;uc007hthalmia-associated tran                   | 17342  | chr6  | ;7057;9792;  |
| Dusp3    | NM_028207;NM_028207;uc007lqa.2;atase 3 (vaccinia virus pho               | 72349  | chr11 | 1.02E+08     |
| Lrrc59   | NM_133807;NM_133807;uc007kze.1;ine rich repeat containing                | 98238  | chr11 | 94629823     |
| Ms4a6d   | NM_026835;NM_026835;uc008gsm.1;ing 4-domains, subfamily                  | 68774  | chr19 | 11586605     |
| BC020394 | BC020394 uc008opv.1; enriched library, clone:9030406H22                  |        | chr3  | 10390322     |
| Zbtb18   | 909;BC0893915;NM_001007dun.2;uc007finger and BTB domain containing 18    |        | chr1  | 177444660    |
| Snhg18   | NR_038186 uc007vkn.2;lar RNA host gene 18 (Snhg18), long r               |        | chr15 | 32240567     |
| Palmd    | ;939;NM_001023243rcx.1;uc008culus palmdelphin (Palmd                     | 114301 | chr3  | ;1857;1169;  |
| Josd2    | 05072;BC01001205072gpm.2;uc007Cs Josephin domain contain                 | 66124  | chr7  | 44467979     |
| Tnni1    | 2;NM_0214;NM_021467;uc033flp.1;musculus troponin I, skeletal, slc        | 21952  | chr1  | 135799510    |
| Ffar2    | 2;NM_0011001168511fhx.1;uc007musculus free fatty acid recept             | 233079 | chr7  | .8356;3081;  |
| Taldo1   | NM_011528;NM_011528;uc009kkv.2;musculus transaldolase 1 (Tald            | 21351  | chr7  | 1.41E+08     |
| Ptrh1    | .78595;AK1;NM_178595jgx.1;uc008A hydrolase 1 homolog (S                  | 329384 | chr2  | 32775820     |
| Mnda     | 150;AK0887;M_0010334 uc007drx.1;cell nuclear differentiator              | 381308 | chr1  | ;8971;1738;  |
| Rasal1   | 832;NM_00832;NM_00100zhs.2;uc008 protein activator like 1 (GAP1 like) (f |        | chr5  | ;9187;1206;  |
| Gvin1    | M_0010391;039160;NM_0010033bjb.1;ase, very large interferon              | 74558  | chr7  | 1.06E+08     |
| Clec3b   | NM_011606;NM_011606;uc009sfw.2;ctin domain family 3, mei                 | 21922  | chr9  | 1.23E+08     |
| Aif1     | 19467;BC0;NM_019467cgm.1;uc007lograft inflammatory fact                  | 11629  | chr17 | 35170991     |
| Pam      | 013626;AK;NM_013626cfr.1;uc007cine alpha-amidating monooxygenase         |        | chr1  | ;97821093;   |
| F3       | 1273;NM_0010173ree.2;uc007musculus coagulation factor III (F3), mRNA     |        | chr3  | ;3536;1217;  |

|                   |                                                                         |        |       |             |
|-------------------|-------------------------------------------------------------------------|--------|-------|-------------|
| Prr18             | NM_178774;NM_178774;uc012ajr.1;nusculus proline rich 18 (Prr18)         | 320111 | chr17 | 3,8341013;8 |
| A330023F21382     | ;NR_015566;uc007ees.1;uc00730023F24 gene (A330023F24Rik), lor           |        | chr1  | .7398;1950: |
| Yif1a             | NM_026553;NM_026553;uc008gcd.2;cting factor homolog A (S.               | 68090  | chr19 | 5088537     |
| Galnt16           | l21;AK1731;NM_0010814;uc007oaw.1;mine:polypeptide N-acety               | 108760 | chr12 | ;80518801;  |
| Prosc             | 9078;AK049;NM_001035;uc009lhv.1;proline synthetase co-trar              | 114863 | chr8  | 27042554    |
| Ccl5              | NM_013653;NM_013653;uc007kpi.2;emokine (C-C motif) ligan                | 20304  | chr11 | 83525778    |
| Nrp1              | :992;AK135;NM_008737;nzq.2;uc007isculus neuropilin 1 (Nrp1), mRNA       |        | chr8  | ;9072;1283! |
| C2cd4c            | DS23979;N614;NM_00;uc007fzc.1;ium-dependent domain c                    | 237397 | chr10 | .2051;7960! |
| Fstl3             | 286;NM_0;NM_031387;fzs.2;uc007sculus follistatin-like 3 (Fstl           | 83554  | chr10 | '7273;7978! |
| Tmem202           | NM_178388;NM_178388;uc009pxv.1;ismembrane protein 202 (                 | 73893  | chr9  | 59518684    |
| Atf5              | 3136;NM_C;NM_030693;gqu.2;uc01s activating transcription f              | 107503 | chr7  | 44812255    |
| Acsf5             | NM_027976;NM_027976;uc008hxp.1;thetase long-chain famil                 | 433256 | chr19 | 55253368    |
| 2210408F20261     | ;NR_040259;NR_029vtz.1;uc013N cDNA 2210408F21 gene (2210408!            |        | chr6  | 31220350    |
| Cysltr1           | NM_021476;NM_021476;uc009ubt.1;cysteinyl leukotriene receptor 1 (Cysl   |        | chrX  | 1.07E+08    |
| Fkbp1a            | AK141261;NM_00801;uc008ndz.1;K506 binding protein 1a (                  | 14225  | chr2  | 1.52E+08    |
| 1700056E2NM_02851 | ;NM_02851;uc011wxw.1;DNA 1700056E22 gene (1                             | 73363  | chr1  | 1.84E+08    |
| 4930523C06        | ;NR_0281;NM_0011628;uc007deb.2;N cDNA 4930523C07 gen                    | 67647  | chr1  | '5161;1600! |
| Sdc4              | NM_011521;NM_011521;uc008nuq.1;sculus syndecan 4 (Sdc4)                 | 20971  | chr2  | 1.64E+08    |
| Ptpn7             | 1;BC098475;NM_177081;uc011wsh.1;ine phosphatase, non-rec                | 320139 | chr1  | 135133749   |
| Nags              | ;765;NM_1;NM_145829;lqq.2;uc007N-acetylglutamate synthas                | 217214 | chr11 | 6365;1021!  |
| Hcrtr1            | C119582;N959;NM_00;uc012dlu.1; hypocretin (orexin) rece                 | 230777 | chr4  | 1.3E+08     |
| Adamts15          | 43;NM_001;NM_0012854;gcv.3;uc03isculus ADAMTS-like 5 (Ac                | 66548  | chr10 | 80339792    |
| Zfp36             | 11756;AK0;NM_011756;wef.1;uc007 Short=TIS11; AltName: Full=TPA          |        | chr7  | '6783;2837! |
| Mtmr11            | NM_181409;NM_181409;uc008qmd.2;ubularin related protein 1               | 194126 | chr3  | 96161969    |
| Ms4a6c            | 595;NM_00595;NM_00;gsg.2;uc008banning 4-domains, subfar                 | 73656  | chr19 | 11469367    |
| Rras2             | 125846;AK1;NM_025846;fsk.1;uc009AS viral (r-ras) oncogene homolog 2 (F  |        | chr7  | 1.14E+08    |
| Zc3h12a           | NM_153159;NM_153159;uc008urx.2;ger CCCH type containing                 | 230738 | chr4  | 6366;1251!  |
| Ooep              | NM_02648;NM_02648;uc009quh.2;oocyte expressed protein                   | 67968  | chr9  | 78376902    |
| Chrn1             | NM_009601;NM_009601;uc007jrj.2;or, nicotinic, beta polype               | 11443  | chr11 | 69784035    |
| Tagln2            | .78598;AF4;NM_178598;dp.1;uc02, complete cds;Mus musci                  | 21346  | chr1  | 6910;1725!  |
| Pla2g16           | AK052657;NM_139265;uc008glh.1;ospholipase A2, group XVI                 | 225845 | chr19 | ;7458;7557! |
| Cd68              | 109853;AK1;NM_009853;jqy.1;uc007sculus CD68 antigen (Cd68               | 12514  | chr11 | 69664370    |
| Fam219a           | C172173;N993;NM_00;uc008siz.2 th sequence similarity 219, member /      |        | chr4  | .8928;4151! |
| Cytip             | 1790;AK172;NM_139208;jsl.1;uc008tohesin 1 interacting prot              | 227929 | chr2  | ;58129138;  |
| Anxa5             | NM_009673;NM_009673;uc008ozj.2 sculus annexin A5 (Anxa5                 | 11747  | chr3  | 36448923    |
| Trim66            | NM_00117;NM_00117;uc012frz.1; tripartite motif-containir                | 330627 | chr7  | 1.09E+08    |
| Arpc1b            | 1275;NM_0;NM_02314;amb.2;uc008d protein 2/3 complex, su                 | 11867  | chr5  | 1.45E+08    |
| Pde2a             | 057029;NM_0011438;uc009iop.3;phodiesterase 2A, cGMP-stimulated          |        | chr7  | .0519;1014! |
| Fjx1              | NM_010218;NM_010218;uc008lhw.1;ur jointed box 1 (Drosoph                | 14221  | chr2  | 1.02E+08    |
| Csf1              | 1529;NM_0;NM_00777;eqxm.1;uc008ony stimulating factor 1 (n              | 12977  | chr3  | 107745594   |
| Panx1             | 1265;NM_0;NM_019482;gon.2;uc008sculus pannexin 1 (Panx1                 | 55991  | chr9  | 15005784    |
| Atf4              | 716;NM_00716;NM_00;gvi.1;uc007s activating transcription f              | 11911  | chr15 | 80255183    |
| Cidea             | NM_007702;NM_007702;uc012beh.1;fragmentation factor, alpl               | 12683  | chr18 | 67343563    |
| Stx11             | 29075;NM_0;NM_001163;foq.1;uc007; musculus syntaxin 11 (Stx11)          |        | chr10 | ;9982;1294! |
| Timp1             | 044384;NM_044384;NM_0;sty.1;uc008ue inhibitor of metalloprc             | 21857  | chrX  | 20870165    |
| Gas2l1            | ;NM_030220408;NM_0;uc007hvr.2; growth arrest-specific 2                 | 78926  | chr11 | 1;5060469;! |
| C1qtnf4           | 6417;NM_C;NM_026161;ktq.1;uc033;or necrosis factor related protein 4 (C |        | chr2  | ;5785;9088! |

|            |                                                                        |        |       |             |
|------------|------------------------------------------------------------------------|--------|-------|-------------|
| Lilra6     | IM_011090;NM_011090uc009ewq.1;in-like receptor, subfamily              | 18726  | chr7  | 3908279     |
| Lyve1      | NM_053247;NM_053247uc009jfr.1;ssel endothelial hyalurona               | 114332 | chr7  | 1.11E+08    |
| Pvr        | I446;NM_0;NM_027514fno.2;uc009ulus poliovirus receptor (P              | 52118  | chr7  | 13577;1991! |
| Txnrd1     | NM_001042762;NM_00uc007gij.1;ilus thioredoxin reductase 1 (Txnrd1)     |        | chr10 | 14604;8285! |
| Rhoq       | NM_145491;NM_145491uc008dum.1;homolog gene family, mem                 | 104215 | chr17 | 86963110    |
| Ly6g5b     | 0;AJ315554:8939;NM_0;uc033hdc.1;te antigen 6 complex, loc              | 266614 | chr17 | 35113945    |
| Creb5      | 8;AK05223(NM_172728uc009bzj.1;ponsive element binding protein 5 (C     |        | chr6  | 53573373    |
| Tmem140    | ;CCDS1999;NM_197988uc033ior.1;ismembrane protein 140 (Tmem140),        |        | chr6  | 12550;3486! |
| Gdf15      | NM_011819;NM_011819uc009mba.2;wth differentiation factor               | 23886  | chr8  | 70629393    |
| Pck2       | NM_028994;NM_028994uc007tyw.1;ruvate carboxykinase 2 (mitochondr       |        | chr14 | 55540265    |
| Laptm5     | 6;AK171053;NM_010688uc008uzu.1;ssociated protein transmembrane 5 (l    |        | chr4  | 1.31E+08    |
| Foxp2      | 051668;NM_0012866uc009aza.1;usculus forkhead box P2 (                  | 114142 | chr6  | 11348;1518! |
| Tox2       | NM_0010987;NM_0010987uc008nso.1;nobility group box family              | 269389 | chr2  | 1.63E+08    |
| Gltpd2     | NM_14602(NM_14602uc007jvd.1;ansfer protein domain co                   | 216871 | chr11 | 70519208    |
| Fam132b    | NM_173395;NM_173395uc007caj.1;equence similarity 132, m                | 227358 | chr1  | 91366429    |
| Ust        | 1782;NM_1;NM_177387xaa.1;uc009;ronyl-2-sulfotransferas                 | 338362 | chr10 | 8204752     |
| Emr1       | 155862;U6;NM_010130eu.2;uc012ing, mucin-like, hormone receptor-lik     |        | chr17 | 57358685    |
| Tex40      | 194;BC1720;NM_0010394uc012bhp.1;us testis expressed 40 (Te             | 67077  | chr19 | 6922425     |
| Zmynd15    | 128979;NM_0010299uc007juz.1;er, MYND-type containin                    | 574428 | chr11 | 19621;7046! |
| Kcnk13     | NM_001164426;NM_001164426uc007osi.2;ium channel, subfamily K,          | 217826 | chr12 | 99964498    |
| Mgp        | NM_00859;NM_00859uc009eml.1;ilus matrix Gla protein (M                 | 17313  | chr6  | 1.37E+08    |
| Irgc1      | NM_19901;NM_19901uc009fpp.1;y-related GTPase family, c                 | 210145 | chr7  | 11998;2443! |
| Dennd3     | 12;NM_001;NM_0010810ztv.1;uc007/MADD domain containin                  | 105841 | chr15 | 73512559    |
| Slc1a4     | NM_018861;NM_018861uc007idb.2;amate/neutral amino aci                  | 55963  | chr11 | 20302179    |
| Sqstm1     | NM_011018;BC0;NM_0110187irx.1;uc007;usculus sequestosome 1 (S          | 18412  | chr11 | 50200151    |
| Htatip2    | 46049;NM_0011460499hbo.2;uc007;nteractive protein 2, homolog (hum      |        | chr7  | 19105;4975! |
| Lonp1      | 1735;NM_0;NM_028782dco.2;uc009;eptidase 1, mitochondri                 | 74142  | chr17 | 56614297    |
| Gm10471    | NM_0011775;NM_0011775uc012dtn.1;redicted gene 10471 (Gm10471), mF      |        | chr5  | 26082171    |
| Gpr39      | NM_02767;NM_02767uc007ckh.2;rotein-coupled receptor                    | 71111  | chr1  | 1.26E+08    |
| AK147021   | AK147021 uc007dbi.1;clone:1920088N03 product:hypothetic                |        | chr1  | 1.56E+08    |
| Psmc8      | 126545;AK1;NM_026545gbb.2;uc009;me, macropain) 26S subui               | 57296  | chr7  | 14186;2917! |
| Defb36     | NM_0010372;NM_0010372uc008nfu.2;ilus defensin beta 36 (Defl            | 266620 | chr2  | 1.53E+08    |
| Ncf4       | 108677;AK1;NM_008677ow.2;uc009;eutrophil cytosolic factor 4 (Ncf4), m  |        | chr15 | 14810;7825! |
| BC032181   | BC032181 uc008gyu.1;gth enriched library, clone:9230105K               |        | chr19 | 21161931    |
| Cpne8      | 1;NM_025033851;NMuc007xho.1; musculus copine VIII (Cpi                 | 66871  | chr15 | 17480;9064! |
| Ddit3      | NM_00783;NM_00783uc007hiy.2;NA-damage inducible tra                    | 13198  | chr10 | 1.27E+08    |
| Ttc34      | NM_172878;NM_172878uc012dql.1;tricopeptide repeat doma                 | 242800 | chr4  | 1.55E+08    |
| 1810034E1  | NR_045798 uc007qys.1;10034E14 gene (1810034E14Rik), lon                |        | chr13 | 64248699    |
| Serpine2   | 109255;AK1;NM_009255bqz.2;uc009;eptidase inhibitor, clade E, membe     |        | chr1  | 14320;7981! |
| Esyt3      | NM_17777;NM_17777uc009reb.1;led synaptotagmin-like pri                 | 272636 | chr9  | 99309966    |
| H2-D1      | NM_010380;267808;NM;chf.1;uc009;ompatibility 2, D region locus 1 (H2-D |        | chr17 | 14027;3526! |
| Tubb2a-ps2 | NR_003964 uc011yki.1;ta 2a, pseudogene 2 (Tubb2a-ps2), nc              |        | chr12 | 11882195    |
| Dcblid2    | 128523;BC0;NM_028523znr.1;uc007;UB and LCCL domain containing 2 (D     |        | chr16 | 158460242;  |
| Gda        | 1078;NM_0;NM_010268gyx.1;uc009;ilus guanine deaminase (Gda), mRNA      |        | chr19 | 18724;2139! |
| Arhgap15   | 7;NM_001025377;NM;jox.1;uc009;io GTPase activating prote               | 76117  | chr2  | 43748823    |
| Zfp652os   | NR_045780 uc007lao.2;in 652, opposite strand (Zfp652os), lc            |        | chr11 | 95700105    |
| Gm6377     | 037917;CCM_0010379;ucu.2;uc03; predicted gene 6377 (Gm6377), mRf       |        | chrX  | 17814;1091! |

|                               |                              |                                          |       |            |
|-------------------------------|------------------------------|------------------------------------------|-------|------------|
| Eif2ak3                       | AK139679;NM_010121uc009cgc.1 | slation initiation factor 2 alpha kinase | chr6  | '8560;7084 |
| 2410131K1M_0010812M_0010812   | uc008zgj.1                   | DNA 2410131K14 gene (2                   | chr5  | 1.18E+08   |
| Apoc2                         | 1277944;BCI_0012779          | fbh.2;uc009us apolipoprotein C-II (Ap    | chr7  | 19671578   |
| E130114P115513;BC048847;AK068 | ttto.2;uc0030114P18          | gene (E130114P18Rik), lon                | chr4  | 97567874   |
| Slc22a23                      | 05;NM_001M_0010331           | qbh.1;uc00carrier family 22, member      | chr13 | 34179157   |
| Sectm1a                       | AK170159;NM_14537            | uc007mve.1                               | chr11 | 1.21E+08   |
| AK042791                      | AK042791                     | uc009cts.1                               | chr6  | 87672381   |
| Tfec                          | 8;AK15742(NM_03119           | uc009aze.2                               | chr6  | 1415;1683  |
| AK192600                      | AK192600                     | uc029rqe.1                               | chr11 | 1.21E+08   |
| F13a1                         | 166391;NM166391;NMqcn.2;uc00 | coagulation factor XIII, A1              | chr13 | ;36867177; |
| Mcpt4                         | NM_01077(NM_01077            | uc007ubl.1                               | chr14 | 56059743   |
| Plat                          | 108872;AK0(NM_00887          | ldx.2;uc009                              | chr8  | 22757743   |
| Arap2                         | .78407;AK0(NM_17840          | xlz.2;uc008AP                            | chr5  | 62602445   |
| Cebpb                         | NM_00988(NM_00988            | uc008oaf.2                               | chr2  | 1.68E+08   |
| Tbr1                          | NM_00932(NM_00932            | uc008jvd.1                               | chr2  | 61804452   |
| BC021614                      | 1269;NM_1(NM_14486           | 3fyh.1;uc00NA                            | chr19 | 4057486    |
| Stac2                         | NM_14602(NM_14602            | uc007lfl.1                               | chr11 | 98036623   |
| Cma1                          | NM_01078(NM_01078            | uc007ubf.1                               | chr14 | 55941450   |
| Tpsb2                         | NM_01078(NM_01078            | uc008bas.1                               | chr17 | 25366332   |
| Rdh10                         | NM_13383(NM_13383            | uc007ajm.1                               | chr1  | 16105881   |
| Srrm4                         | NM_02688(NM_02688            | uc008zfb.1                               | chr5  | 3155;1164  |
| Klhdc8a                       | NM_14481(NM_14481            | uc007con.1                               | chr1  | 1.32E+08   |
| Npw                           | M_0010996M_0010996           | uc008axm.2                               | chr17 | 24657329   |
| Scand1                        | 8298;NM_CNM_02025            | ennc.2;uc03CAN                           | chr2  | .1845;1563 |
| Il6ra                         | 10559;AK1(NM_01055           | qaf.1;uc008                              | chr3  | 89869323   |
| Cd53                          | NM_00765(NM_00765            | uc008qwm.1                               | chr3  | 1.07E+08   |
| Shc4                          | 1946;NM_1(NM_19902           | ncy.1;uc008                              | chr2  | 125649104  |
| AK084494                      | AK084494                     | uc008lll.1                               | chr2  | 1.07E+08   |
| Gfod1                         | 1033399;AKM_0010333          | 'qfx.1;uc008                             | chr13 | 15424;4319 |
| Dok3                          | 113739;AK1(NM_01373          | qrm.1;uc00                               | chr13 | 55523234   |
| Gm15417                       | 10404;NR_04040               | uc008pzf.1;uc008                         | chr3  | 11863;8939 |
| C1qb                          | NM_00977(NM_00977            | uc008vip.2                               | chr4  | 1.37E+08   |
| Ttyh2                         | 153273;AK1(NM_05327          | enfm.1;uc01                              | chr11 | 1.15E+08   |
| Klf6                          | NM_01180(NM_01180            | uc007pjw.1                               | chr13 | 5861488    |
| AK020645                      | AK020645                     | uc007cpy.1                               | chr1  | 1.33E+08   |
| 4930448K2NR_004448            |                              | uc012dal.1                               | chr4  | 9915964    |
| Bpifb9a                       | NM_17516(NM_17516            | uc008niz.1                               | chr2  | 1.54E+08   |
| AK082432                      | AK082432                     | uc008nsn.1                               | chr2  | 1.63E+08   |
| AK171153                      | AK171153                     | uc008ccf.1;uc008                         | chr17 | 16546;3428 |
| Speer5-ps1                    | 11582;NR_02750               | uc011xdm.1;uc00                          | chr10 | 10446;4421 |
| Adam4                         | NM_00962(NM_00962            | uc007ocd.1                               | chr12 | 81419548   |
| Tyrobp                        | NM_01166(NM_01166            | uc009gef.1                               | chr7  | 30413787   |
| E130317F2NR_029447            |                              | uc011xib.1                               | chr10 | 79851376   |
| Fcgr2b                        | M_010187;077189;NM           | lms.2;uc00                               | chr1  | 10558;1709 |
| Pappa                         | 121362;AF4(NM_02136          | zhm.1;uc01                               | chr4  | 65124173   |
| Steap1                        | NM_02739(NM_02739            | uc008wjb.2                               | chr5  | 5736321    |
| Gm12250                       | M_0011351M_0011351           | uc011xvf.1                               | chr11 | 58183842   |

|            |                                             |                                                                                        |       |             |
|------------|---------------------------------------------|----------------------------------------------------------------------------------------|-------|-------------|
| H2-K1      | 92;BC080711;NM_001001811;uc033hct.1         | histocompatibility 2, K1, K region (H2-K1)                                             | chr17 | ;33996011;  |
| Sema3b     | 364;BC0906153;NM_001001811;uc009g           | domain (Ig), short basic (Sema3b)                                                      | chr9  | 1.08E+08    |
| BC071253   | BC071253                                    | uc012hdm.10051L08 product:NADH-ubiquinone oxidoreductase                               | chrM  | 11719       |
| C1qa       | NM_007572;NM_007572;uc008vir.1              | onent 1, q subcomponent (C1qa)                                                         | chr4  | 1.37E+08    |
| Chpf2      | AK122504;NM_133913;uc012dte.1               | ndroitin polymerizing factor (Chpf2)                                                   | chr5  | ;6749;2458; |
| Cdr2       | NM_007672;NM_007672;uc012ftc.2              | bellar degeneration-related protein 2 (Cdr2)                                           | chr7  | 1.21E+08    |
| Jdp2       | NM_030887;NM_030887;uc007ohb.1              | ilus Jun dimerization protein 2 (Jdp2)                                                 | chr12 | ;85599104;  |
| Dusp10     | NM_022019;NM_022019;uc007dym.1              | specificity phosphatase 10 (Dusp10)                                                    | chr1  | 1.84E+08    |
| 2610016A17 | NR_045347                                   | uc008hbl.210016A17 gene (2610016A17Rik), loricrin                                      | chr19 | 25671133    |
| Tesc       | 4;GQ85626(NM_021344;uc008zgd.1              | nusculus tescalcin (Tesc), protein                                                     | chr5  | ;6032;1180; |
| C1qc       | NM_007574;NM_007574;uc008viq.1              | component 1, q subcomponent (C1qc)                                                     | chr4  | 1.37E+08    |
| Gm14005    | NR_028590;NR_028590;uc012cdr.1              | lus predicted gene 14005 (Gm14005)                                                     | chr2  | 128316299   |
| C4b        | 0;BC039141;NM_009780;uc008cdl.2             | nt component 4B (Chido) (C4b)                                                          | chr17 | 34728380    |
| Ptchd1     | NM_00109371;NM_00109371;uc009urw.1          | tched domain containing protein 1 (Ptchd1)                                             | chrX  | 1.56E+08    |
| H2-Q5      | NR_051981                                   | uc008chn.2itibility 2, Q region locus 5 (H2-Q5), non-polyomorphic                      | chr17 | 35394098    |
| Csrnp1     | 1658;NM_111153287;sbu.1;uc009ser.1          | le-serine-rich nuclear protein 1 (Csrnp1)                                              | chr9  | 1.2E+08     |
| Nfatc1     | 6791;NM_16791;NM_16791;uc012div.1           | ivated T cells, cytoplasmic, calcineurin-dependent nuclear factor of activated T cells | chr18 | ;7434;8060; |
| Gm19461    | NR_037984                                   | uc007cpw.2nted gene, 19461 (Gm19461), non-coding RNA                                   | chr1  | 1.33E+08    |
| Mettl7b    | NM_027853;NM_027853;uc007hpd.1              | ethyltransferase like 7B (Mettl7b)                                                     | chr10 | 1.29E+08    |
| Bach2os    | 4923;NR_026843;uc008seu.1;uc009hol.2        | ology 2, opposite strand (Bach2os), loricrin                                           | chr4  | ;1201;3255; |
| Cpa3       | NM_007753;NM_007753;uc008osp.2              | boxypeptidase A3, mast cell chymase (Cpa3)                                             | chr3  | 20215615    |
| Cdr2l      | NM_00108091;NM_00108091;uc007mhi.1          | degeneration-related protein 2 (Cdr2l)                                                 | chr11 | 1.15E+08    |
| Slc35c1    | 15832;NM_15832;NM_15832;uc009kyb.1          | ulate carrier family 35, member 1 (Slc35c1)                                            | chr2  | 92452764    |
| Slc15a3    | 123044;AK1123044;NM_023044;gra.2;uc009car.1 | carrier family 15, member 3 (Slc15a3)                                                  | chr19 | 10842543    |
| Rhbdl2     | 3;BC115495;NM_183163;uc008upx.1             | oid, veinlet-like 2 (Drosophila) (Rhbdl2)                                              | chr4  | ;7874;1238; |
| Prelp      | NM_054077;NM_054077;uc007crc.3              | ginine-rich end leucine-rich repeat protein (Prelp)                                    | chr1  | 1.34E+08    |
| Selplg     | 3874;AK0809;NM_009153;yyt.2;uc009tin.1      | tin, platelet (p-selectin) ligand (Selplg)                                             | chr5  | 8535;1138;  |
| Atp1b1     | NM_009721;NM_009721;uc007dip.2              | /K <sup>+</sup> transporting, beta 1 protein (Atp1b1)                                  | chr1  | 1.64E+08    |
| Kcnp1      | 01190886;NM_00119071;ikp.2;uc009kv.1        | v channel-interacting protein 1 (Kcnp1)                                                | chr11 | 33629340    |
| 1810011H11 | NM_00116361;NM_00116361;uc007szh.1          | DNA 1810011H11 gene (1810011H11Rik)                                                    | chr14 | 32785962    |
| BC024571   | BC024571                                    | uc008kbg.1n alpha 6, mRNA (cDNA clone IMAGE:100000000)                                 | chr2  | 71856763    |
| Serpina3g  | 1065;NM_001009251;rs.1;uc007pep.1           | peptidase inhibitor, clade A, member 3 (Serpina3g)                                     | chr12 | ;6241;1042; |
| AK085201   | AK085201                                    | uc008iqj.1ength enriched library, clone:D530008                                        | chr2  | 25141796    |
| Abca12     | 75210;AK075210;NM_175210;jo.2;uc011set.1    | ette, sub-family A (ABC1) (Abca12)                                                     | chr1  | ;0012;7136; |
| Slc11a1    | NM_013612;NM_013612;uc007bly.2              | -coupled divalent metal ion transporter 1 (Slc11a1)                                    | chr1  | 74375202    |
| Mab21l3    | NM_172295;NM_172295;uc008qrk.2              | ab-21-like 3 (C. elegans) (Mab21l3)                                                    | chr3  | 1.02E+08    |
| Ces1b      | NM_00108131;NM_00108131;uc009muk.1          | s carboxylesterase 1B (Ces1b)                                                          | chr8  | 93056726    |
| Cyp2d26    | NM_029562;NM_029562;uc007wzn.1              | , family 2, subfamily d, member 26 (Cyp2d26)                                           | chr15 | 82790106    |
| AK041310   | AK041310                                    | uc008rgq.1ength enriched library, clone:A530098                                        | chr3  | 1.27E+08    |
| D130058E05 | AK036422                                    | uc007bzc.1-Protein D130058E05Rik; Flags: Fragr                                         | chr1  | 89930233    |
| Prodh2     | 1815;NM_001019546;fhr.1;uc009de.1           | dehydrogenase (oxidase) family 2, member 2 (Prodh2)                                    | chr7  | ;9766;3049; |
| Bex6       | 116;NM_001010335;yyk.1;uc033s               | s brain expressed gene 6 (Bex6), mRNA                                                  | chr16 | ;9799;3218; |
| AK080816   | AK080816                                    | uc007fpc.1ength enriched library, clone:U080816                                        | chr10 | 73099341    |
| BC057675   | BC057675                                    | uc033gmj.1;uc020016E24 product:unclassifiable, full length                             | chr13 | ;4228;6821; |
| Itgb2      | 108404;BC1108404;NM_008404;fvw.1;uc01cul    | culus integrin beta 2 (Itgb2)                                                          | chr10 | ;1931;7753; |
| Mfsd6      | NM_178081;178081;NM_178081;uc007aym.1       | ilitator superfamily domain containing protein 6 (Mfsd6)                               | chr1  | ;52675622;  |
| Rrad       | NM_019662;NM_019662;uc009naz.1              | related associated with diazepam (Rrad)                                                | chr8  | 1.05E+08    |

|               |                           |                                                         |          |       |             |
|---------------|---------------------------|---------------------------------------------------------|----------|-------|-------------|
| Tnfrsf1       | 71456;NM_001271456        | 7ip.3;uc00s TNFAIP3 interacting pro                     | 57783    | chr11 | .6795;54910 |
| Irf4          | 1319;NM_001013674         | pyz.1;uc00s interferon regulatory facto                 | 16364    | chr13 | 30749257    |
| Rgs1          | 1306;NM_001015817         | cxk.1;uc00s ulator of G-protein signali                 | 50778    | chr1  | 1.44E+08    |
| Padi2         | 3685;NM_001008813         | vnj.1;uc00s idyl arginine deiminase, type II (Padi2     | 16190    | chr4  | 14158;14090 |
| IL4ra         | 1001008;NM_001008710      | uc009jqb.1;interleukin 4 receptor, alpl                 | 16190    | chr7  | 1.26E+08    |
| Uchl1         | 11670;AK1011670           | xpf.2;uc00s in carboxy-terminal hydrolase L1 (Uchl1)    | 16190    | chr5  | 16892;66670 |
| Nfya          | 100869;NM_001008690       | uc008cqv.1;olypeptide gene enhance                      | 18037    | chr17 | 45555715    |
| AK017306      | AK017306                  | uc007ecv.1;length enriched library, clone:2900001       | 18037    | chr1  | 1.92E+08    |
| Pilra         | 153510;AK0153510          | aeb.2;uc00s hnuoglobin-like type 2 rec                  | 231805   | chr5  | 1.38E+08    |
| Stat4         | 7;AK037598;NM_011487      | uc007axw.1;ducer and activator of transcription 4       | 18037    | chr1  | 18243;51980 |
| Ccr1          | 3666;NM_001009912         | sgy.2;uc03s mokine (C-C motif) recept                   | 12768    | chr9  | 13423;12390 |
| Rhob          | 100748;NM_001007483       | uc007mzp.1;homolog gene family, mem                     | 11852    | chr12 | 8497758     |
| C1qtnf3       | 888;NM_00888;NM_001008882 | uc00s tumor necrosis factor rela                        | 81799    | chr15 | 12356;10950 |
| Pf4           | 101993;NM_019932          | uc008ybi.2;culus platelet factor 4 (Pf4)                | 56744    | chr5  | 90772434    |
| 6430562O15Rik | NR_015515                 | uc007rpp.230562O15 gene (6430562O15Rik), lor            | 56744    | chr13 | 99410835    |
| C3ar1         | 109779;CCDS109779         | siuo.1;uc00s ment component 3a rece                     | 12267    | chr6  | 17139;12280 |
| Clec4d        | 819;NM_00819;NM_001008192 | uc00s e lectin domain family 4, member d                | 12267    | chr6  | 1.23E+08    |
| Meox1         | 1010791;NM_010791         | uc007lpx.1;mesenchyme homeobox 1                        | 17285    | chr11 | 1.02E+08    |
| Slc40a1       | 1987;FJ2074;NM_016917     | awv.1;uc01s 40 (iron-regulated transp                   | 53945    | chr1  | 145921155;  |
| Speer4c       | 10012815;NM_00102815      | uc008wmt.2;associated glutamate (E)-                    | 1.01E+08 | chr5  | 15709504    |
| Alox5ap       | 100966;NM_009663          | uc009app.1e 5-lipoxygenase activatin                    | 11690    | chr5  | 1.49E+08    |
| Creb3         | 1013497;NM_013497         | uc008sqg.1;ponsive element binding                      | 12913    | chr4  | 43562633    |
| Il1b          | 1;AK225003;NM_008361      | uc008mht.1;ulus interleukin 1 beta (Il1b), mRNA         | 12913    | chr2  | 1.29E+08    |
| Fam43b        | 10010816;NM_0010816       | uc008vnx.2;sequence similarity 43, m                    | 625638   | chr4  | 1.38E+08    |
| Pdlim1        | 1992;NM_001016861         | hkl.2;uc00s Z and LIM domain 1 (elfin) (Pdlim1), r      | 625638   | chr19 | 17291;40220 |
| Sh3gl3        | 100127795;NM_001027795    | uc029wmn.2;ilus SH3-domain GRB2-like                    | 20408    | chr7  | 82259907    |
| Srgn          | 1011157;NM_011157         | uc007fhi.1;nusculus serglycin (Srgn),                   | 19073    | chr10 | 62494427    |
| Isg15         | 101578;NM_015783          | uc012dri.1;G15 ubiquitin-like modifi                    | 1E+08    | chr4  | 1.56E+08    |
| Thbs1         | 1011580;M811580           | 18lrq.1;uc00s ilus thrombospondin 1 (Thbs1), mRNA       | 1E+08    | chr2  | 1.18E+08    |
| Slc16a5       | 134;BC0539;NM_0010809     | uc007mhp.1;(monocarboxylic acid trar                    | 217316   | chr11 | 115462472   |
| Fcgr1         | 180;NM_0110181            | qmr.1;uc00s e receptor, IgG, high affinity I (Fcgr1), r | 217316   | chr3  | 96282908    |
| Lilrb4        | 1170368;NM_0113532        | uc007fas.1;obulin-like receptor, subfamily B, me        | 217316   | chr10 | 10974;51490 |
| Bik           | 107546;BC0107546          | xbe.1;uc00s us BCL2-interacting killer (Bik), mRNA      | 217316   | chr15 | 16861;83520 |
| Nr1h4         | 109108;NM_009108          | gsh.2;uc00s eceptor subfamily 1, group H, membe         | 217316   | chr10 | 17409;89450 |
| Baiap2l1      | 102583;NM_025833          | uc009alq.1;-associated protein 2-like                   | 66898    | chr5  | 1.44E+08    |
| Rbp1          | 101125;NM_011254          | uc009rdj.1;nol binding protein 1, cell                  | 19659    | chr9  | 98422960    |
| Cgref1        | 770;NM_00770;NM_00100770  | vwo.1;uc01s owth regulator with EF hand domain          | 19659    | chr5  | 30933142    |
| Kcna6         | 1;CCDS2055;NM_013568      | uc009dvd.2;d channel, shaker-related                    | 16494    | chr6  | 18328;12670 |
| Ptx3          | 100898;NM_008987          | uc008pla.1;s pentraxin related gene                     | 19288    | chr3  | 66219886    |
| Crym          | 116669;AK1016669          | jml.1;uc00s sculus crystallin, mu (Crym), mRNA          | 19288    | chr7  | 17137;12010 |
| Mrgprb2       | 1303;NM_0117553           | 19hat.2;uc03s s-related GPR, member B2 (Mrgprb2)        | 19288    | chr7  | 11958;48550 |
| Ctgf          | 1010217;NM_010217         | uc011xbr.1;nnective tissue growth fa                    | 14219    | chr10 | 24595441    |
| Fdx1l         | 10010398;NM_0010398       | uc009okb.1;ulus ferredoxin 1-like (Fdx                  | 68165    | chr9  | 21066939    |
| Tpsab1        | 31187;NR_031187           | anf.1;uc00s ulus tryptase alpha/beta 1 (Tpsab1)         | 68165    | chr17 | 25343244    |
| Tubb3         | 102327;NM_023275          | uc009nvt.1;s tubulin, beta 3 class III (T               | 22152    | chr8  | 1.23E+08    |
| Rgs16         | 101126;NM_011267          | uc007dae.2;lator of G-protein signalin                  | 19734    | chr1  | 1.54E+08    |
| Cbr3          | 117304;NM_017304          | uc007zsz.2;us carbonyl reductase 3 (C                   | 109857   | chr16 | 93683218    |



|                                  |                              |                                                                                    |           |       |           |
|----------------------------------|------------------------------|------------------------------------------------------------------------------------|-----------|-------|-----------|
| Pmm1                             | U040;NM_001282               | musculus phosphomannomutase 1 (Pmm1), mRNA                                         | 29858     | chr15 | 5553;8195 |
| Madcam1                          | U013591;S8NM_013591          | musculus addressin cell adhesion molecule 1 (Madcam1), mRNA                        | 79664573  | chr10 | 79664573  |
| Trem14                           | U172623;NM_004895            | musculus receptor expressed on myeloid cells 14 (Trem14), mRNA                     | 224840    | chr17 | 48264294  |
| A930001C045990;AK048995;BC084895 | U48995;BC084895              | musculus cDNA A930001C03 gene (A930001C03), mRNA                                   | 34446812  | chr19 | 34446812  |
| Cystm1                           | U17;NM_001001081             | musculus transmembrane module containing 1 (Cystm1), mRNA                          | 66060     | chr18 | 36348623  |
| Dpep2                            | U196;AK171                   | musculus dipeptidase 2 (Dpep2), mRNA                                               | 106E+08   | chr8  | 1.06E+08  |
| Cybb                             | U07807;AK007807              | musculus chromosome b-245, beta polypeptide (Cybb), mRNA                           | 5253;9464 | chrX  | 5253;9464 |
| Ly86                             | U01074;NM_01074              | musculus lymphocyte antigen 86 (Ly86), mRNA                                        | 17084     | chr13 | 37345344  |
| 4930430D2061;NM_001010348        | U010348                      | musculus DNA 4930430D24 gene (4930430D24), mRNA                                    | 8346;3803 | chrX  | 8346;3803 |
| Ceacam1                          | U39187;NM_186;NM_004009      | musculus antigen-related cell adhesion molecule 1 (Ceacam1), mRNA                  | 1701;2547 | chr7  | 1701;2547 |
| Nfkb2                            | U134081;NM_001177            | musculus light polypeptide gene enhancer in B-cells 2 (Nfkb2), mRNA                | 4799;4630 | chr19 | 4799;4630 |
| Hid1                             | U861;NM_101754               | musculus HID1 domain containing (Hid1), mRNA                                       | 1.15E+08  | chr11 | 1.15E+08  |
| Phlda1                           | U9344;CCDS100934             | musculus phalloidin-binding domain-like domain, family A, member 1 (Phlda1), mRNA  | 6404;1115 | chr10 | 6404;1115 |
| Ccdc109b                         | U25779;AK102577              | musculus coil domain containing 109 (Ccdc109b), mRNA                               | 66815     | chr3  | 1.3E+08   |
| Slamf7                           | U154;NM_101445               | musculus SLAM family member 7 (Slamf7), mRNA                                       | 6228;1716 | chr1  | 6228;1716 |
| Gale                             | U78389;AK007838              | musculus galactose-4-epimerase, UCE (Gale), mRNA                                   | 74246     | chr4  | 3729;1359 |
| Slc22a4                          | U595;NM_00101968             | musculus organic cation transporter 22 (Slc22a4), mRNA                             | 30805     | chr11 | 53983125  |
| Gsg1                             | U010352;NM_010352            | musculus germ cell-specific protein 1 (Gsg1), mRNA                                 | 14840     | chr6  | 1.35E+08  |
| Il34                             | U0;NM_029135                 | musculus interleukin 34 (Il34), mRNA                                               | 76527     | chr8  | 1.11E+08  |
| Smim5                            | U414;NM_101832               | musculus integral membrane protein 5 (Smim5), mRNA                                 | 66528     | chr11 | 1.16E+08  |
| Kcnk6                            | U1033525;BCU0010335          | musculus potassium channel, subfamily A, member 6 (Kcnk6), mRNA                    | 52150     | chr7  | 29221927  |
| Ptprn                            | U00898;NM_00898              | musculus protein tyrosine phosphatase, receptor type C, member 1 (Ptprn), mRNA     | 19275     | chr1  | 5533;7524 |
| 2900026A02                       | U17288;NM_17288              | musculus DNA 2900026A02 gene (2900026A02), mRNA                                    | 243219    | chr5  | 1.13E+08  |
| Prkca                            | U011101;NM_011101            | musculus protein kinase C, alpha (Prkca), mRNA                                     | 18750     | chr11 | 1.08E+08  |
| Sirpb1b                          | U0011734;NM_0011734          | musculus regulatory protein beta 1B (Sirpb1b), mRNA                                | 15495753  | chr3  | 15495753  |
| Lgals3                           | U3;NM_010145                 | musculus galactose binding protein 3 (Lgals3), mRNA                                | 16854     | chr14 | 3973;4737 |
| Apela                            | NR_040692                    | musculus early endogenous ligand (Apela), loricrin (Apela), loricrin (Apela), mRNA | 65028416  | chr8  | 65028416  |
| Tmem71                           | U17251;NM_17251              | musculus transmembrane protein 71 (Tmem71), mRNA                                   | 213068    | chr15 | 66526211  |
| Tor3a                            | U151390;NM_023141            | musculus TOR signaling pathway, member A (Tor3a), mRNA                             | 30935     | chr1  | 5326;1566 |
| Cd44                             | U00103915039150;NM_001039150 | musculus CD44 antigen (Cd44), mRNA                                                 | 12505     | chr2  | 1141;1028 |
| Vwde                             | U0010137;NM_0010137          | musculus von Willebrand factor D and EGF repeats (Vwde), mRNA                      | 232585    | chr6  | 13185610  |
| Btg2                             | U00757;NM_00757              | musculus location gene 2, anti-proliferative (Btg2), mRNA                          | 12227     | chr1  | 1.34E+08  |
| Haao                             | U02532;NM_02532              | musculus 3,4-dihydroxyanthranilate 3,4-dioxygenase (Haao), mRNA                    | 107766    | chr17 | 1353;8383 |
| Slc16a10                         | U114332;NM_011433            | musculus monocarboxylic acid transporter 16 (Slc16a10), mRNA                       | 72472     | chr10 | 3534;4007 |
| Myc                              | U010849;NM_0011773           | musculus myelocytomatosis oncogene (Myc), mRNA                                     | 17869     | chr15 | 7421;6198 |
| Krt80                            | U811;NM_00102877             | musculus keratin 80 (Krt80), mRNA                                                  | 74127     | chr15 | 101356933 |
| Cebpd                            | U00767;NM_00767              | musculus cancer binding protein (C/EBP), delta (Cebpd), mRNA                       | 15887285  | chr16 | 15887285  |
| Ctsh                             | U07801;AK100780              | musculus cathepsin H (Ctsh), mRNA                                                  | 13036     | chr9  | 90054266  |
| AK028711                         | AK028711                     | musculus tyk1 gene enriched library, clone:4732441L2 (AK028711), mRNA              | 1.06E+08  | chr4  | 1.06E+08  |
| Zfp389                           | NR_026798                    | musculus finger protein 389 (Zfp389), non-coding RNA                               | 21504315  | chr13 | 21504315  |
| Cfp                              | U00882;NM_00882              | musculus complement factor properdin (Cfp), mRNA                                   | 18636     | chrX  | 20925534  |
| Tlr2                             | U11905;CCDS101190            | musculus toll-like receptor 2 (Tlr2), mRNA                                         | 6419;8383 | chr3  | 6419;8383 |
| Slc10a3-ub5                      | U110;NM_00127827             | musculus Slc10a3-Ubl4 readthrough (Slc10a3-ub5), mRNA                              | 7446;7435 | chrX  | 7446;7435 |
| Ntn5                             | U0012896;NM_0012896          | musculus netrin 5 (Ntn5), mRNA                                                     | 243967    | chr7  | 45684021  |
| Relb                             | U39799;NM_009046             | musculus reovirus-induced endothelial cell death-inducing factor (Relb), mRNA      | 19698     | chr7  | 19606221  |
| Sowahb                           | U17527;NM_17527              | musculus kyrim repeat domain family 1 (Sowahb), mRNA                               | 78088     | chr5  | 93041122  |
| Rhbdf2                           | U00116768167680;NM_001167680 | musculus rhomboid 5 homolog 2 (Rhbdf2), mRNA                                       | 217344    | chr11 | 3252;1165 |

|            |           |                              |                                             |                                  |        |             |             |
|------------|-----------|------------------------------|---------------------------------------------|----------------------------------|--------|-------------|-------------|
| B4galt5    | NM_019835 | NM_019835uc008nzm.1          | beta 1,4-galactosyltransfe                  | 56336                            | chr2   | 1.67E+08    |             |
| Gp49a      | 3C065784; | ANM_008147uc007fan.1;        | lus glycoprotein 49 A (Gp                   | 14727                            | chr10  | 10678;51481 |             |
| Zfp365     | NM_178679 | NM_178679uc007fmb.1          | zinc finger protein 365 (Z                  | 216049                           | chr10  | 16104;67891 |             |
| Coro6      | NM_139129 | NM_139129uc007kgq.1          | nusculus Coro6 mRNA for coronin6/c          |                                  | chr11  | 177463910;  |             |
| Nudt18     | 1446;     | NM_153131uc011uok.1;         | uc011iphosphate linked moiety               | 213484                           | chr14  | 170577846   |             |
| Nes        | NM_016701 | NM_016701uc008ptl.1          | musculus nestin (Nes), m                    | 18008                            | chr3   | 187971092   |             |
| 6030419C1  | 1614;     | NM_176921pwz.1;              | uc000DNA 6030419C18 gene (6                 | 319477                           | chr9   | 19607;58481 |             |
| Pdgfb      | 111057;   | AK011057mva.1;               | uc000rived growth factor, B po              | 18591                            | chr15  | 12390;79991 |             |
| Wnt10b     | 718;      | U61971NM_011711uc007xnu.2;   | elated MMTV integration site 10b (W         |                                  | chr15  | 198771751   |             |
| Sntb1      | NM_016667 | NM_016667uc007vsk.1          | lus syntrophin, basic 1 (Sn                 | 20649                            | chr15  | 155639153   |             |
| Agpat9     | 5;        | AK13841(NM_172711uc008yii.1; | ol-3-phosphate O-acyltra                    | 231510                           | chr5   | 16363;10081 |             |
| Msr1       | 195;      | NM_00195;                    | NM_00mk.1;                                  | uc012macrophage scavenger re     | 20288  | chr8        | 13451;39581 |
| Gadd45b    | NM_008655 | NM_008655uc007gfl.1          | and DNA-damage-inducib                      | 17873                            | chr10  | 180930090   |             |
| Prune2     | NM_181348 | NM_181348uc008gkx.2          | ne homolog 2 (Drosophil                     | 353211                           | chr19  | 17136767;   |             |
| Gpr126     | N_0010022 | N_0010022 uc007elk.1         | otein-coupled receptor 1:                   | 215798                           | chr10  | 14402584    |             |
| Gadd45a    | NM_007836 | NM_007836uc009cfc.1          | and DNA-damage-inducib                      | 13197                            | chr6   | 167035095   |             |
| Lgr5       | 5;        | AK134981NM_010195uc007hbk.1; | at containing G protein coup                |                                  | chr10  | 1115450313  |             |
| Tnfrsf23   | 124290;   | AK112429(kpu.1;              | uc000factor receptor superfamily, member 2  |                                  | chr7   | 1.44E+08    |             |
| Cxcl16     | 123158;   | AK012315(xxt.1;              | uc000okine (C-X-C motif) liganc             | 66102                            | chr11  | 170455158;  |             |
| Gm1631     | NR_037979 | uc008kay.1                   | ted gene 1631 (Gm1631), long non-cc         |                                  | chr2   | 171719416   |             |
| Pira6      | 1093;     | NM_1093;                     | NM_1(exh.1;                                 | uc000ilus paired-Ig-like recepto | 18722  | chr7        | 123884213;1 |
| Wfdc17     | N_0010819 | N_0010819uc007kpq.1          | our-disulfide core domair                   | 1E+08                            | chr11  | 183704055   |             |
| Nlrp10     | NM_175532 | NM_175532uc009jdb.1          | ily, pyrin domain contain                   | 244202                           | chr7   | 1.09E+08    |             |
| Tinagl1    | 140827;   | NM168333;                    | NMuyy.1;                                    | uc020ointerstitial nephritis ant | 94242  | chr4        | 130165599   |
| AA467197   | 97;       | NM_00110010041naz.1;         | uc000ssed sequence AA467197                 | 433470                           | chr2   | 17914;12261 |             |
| Sgms2      | NM_028945 | NM_028945uc008rjq.2          | phingomyelin synthase 2                     | 74442                            | chr3   | 1.31E+08    |             |
| Hspb8      | NM_030704 | NM_030704uc008zez.1          | is heat shock protein 8 (H                  | 80888                            | chr5   | 1.16E+08    |             |
| Gm13889    | N_0011450 | N_0011450 uc012bxz.1         | redicted gene 13889 (Gm                     | 620695                           | chr2   | 193955809   |             |
| Samsn1     | AK016072; | NM_023381uc007zrs.1;         | domain and nuclear localization signa       |                                  | chr16  | 12530;75851 |             |
| Lif        | 501;      | NM_00501;                    | NM_00hut.1;                                 | uc000ulus leukemia inhibitory f  | 16878  | chr11       | 17567;42661 |
| Slitrk4    | 1);       | BC117891NM_178741uc009tio.1; | nd NTRK-like family, mem                    | 245446                           | chrX   | 19443;64271 |             |
| 2200002D0  | NM_028175 | NM_028175uc009gbj.2          | DNA 2200002D01 gene (2                      | 72275                            | chr7   | 129247520   |             |
| I730030J21 | 15782;    | NR_045781uc007xsd.2;         | uc020EN cDNA I730030J21 gene (I730030J      |                                  | chr15  | 1.01E+08    |             |
| Gm19510    | NR_045076 | uc007vxy.1                   | d gene, 19510 (Gm19510), long non- <i>i</i> |                                  | chr15  | 159788416   |             |
| Gm3143     | 18347;    | NR_038348uc029ulb.1;         | uc020ulus predicted gene 3143 (Gm3143)      |                                  | chr3   | 19622;34691 |             |
| Itgax      | 17200;    | NM_021331ajyc.1;             | uc000ulus integrin alpha X (Itgax), mRNA    |                                  | chr7   | 1.28E+08    |             |
| Maff       | NM_010755 | NM_010755uc007wth.1          | tic fibrosarcoma oncogen                    | 17133                            | chr15  | 179347677   |             |
| Rtn1       | 6;        | NM_00100100759envk.2;        | uc000is musculus reticulon 1 (Rtn1)         |                                  | chr12  | 172211748   |             |
| Casp4      | 1730;     | AB480NM_007601obs.2;         | uc000poptosis-related cysteine              | 12363                            | chr9   | 18859;53211 |             |
| AK150172   | AK150172  | uc008eqj.1                   | ched library, clone:G530001019 proc         |                                  | chr18  | 137652752   |             |
| Tomt       | 11679;    | NM_11679;                    | NM_0ipu.1;                                  | uc000ansmembrane O-methyltr      | 791260 | chr7        | 1.02E+08    |
| Rnf183     | 8775;     | NM_153501icp.1;              | uc000ring finger protein 183 (R             | 76072                            | chr4   | 17986;62421 |             |
| Gm13498    | NR_033595 | uc012bvh.1                   | cted gene 13498 (Gm13498), non-coc          |                                  | chr2   | 150909683   |             |
| Ly6a       | 117;      | NM_00117;                    | NM_00uh.1;                                  | uc007nphocyte antigen 6 compl    | 110454 | chr15       | 174994876   |
| Hcst       | 3C145545; | NM_011821uc012fhm.1          | atopoietic cell signal trans                | 23900                            | chr7   | 17777;30411 |             |
| AK190779   | AK190779  | uc029ssm.1                   | ence:ENSEMBL:Mouse-Transcript-EN            |                                  | chr15  | 177915046   |             |
| Lyz2       | NM_017372 | NM_017372uc007hda.1          | usculus lysozyme 2 (Lyz2),                  | 17105                            | chr10  | 1.17E+08    |             |

|            |                                 |                                        |       |             |
|------------|---------------------------------|----------------------------------------|-------|-------------|
| Tnf        | 001278601278601;NM:uc008cgr.2   | sculus tumor necrosis factor (Tnf)     | chr17 | 35199366    |
| Sh3bgr     | VM_015825VM_015825uc008acu.1g   | domain glutamic acid-ric               | chr16 | 96200469    |
| Emb        | VM_010333VM_010333uc007rym.2    | nusculus embigin (Emb), r              | chr13 | 1.17E+08    |
| Mvp        | VM_080638VM_080638uc009jtw.2    | lus major vault protein (M             | chr7  | 1.27E+08    |
| Ccl6       | VM_009139VM_009139uc007kpm.1    | emokine (C-C motif) ligan              | chr11 | 83587885    |
| Ccl9       | VM_011338VM_011338uc007kpi.1    | emokine (C-C motif) ligan              | chr11 | 83572916    |
| Gch1       | VM_008102VM_008102uc007tth.1    | s GTP cyclohydrolase 1 (C              | chr14 | 47153894    |
| Cda        | VM_028176VM_028176uc008vkw.1    | ilus cytidine deaminase (C             | chr4  | 1.38E+08    |
| Ltbp1      | ;NM_019916958;NM_(uc008doo.2    | forming growth factor bet              | chr17 | 15528;7517: |
| Plaur      | .011113;X6:VM_011113fpr.1;uc01  | ogen activator, urokinase receptor (PI | chr7  | 24462499    |
| 9430076C15 | ;AK035031;AK035031uc009bze.2    | 30076C15 gene (9430076C15Rik), lor     | chr6  | 53287294    |
| Serp1b10   | 160307;NM160307;NM160307uc01    | ptidase inhibitor, clade B (ovalbumin) | chr1  | 1.08E+08    |
| Tnfrsf12a  | 749;NM_00749;NM_00749uc008s     | factor receptor superfar               | chr17 | 23675444    |
| Cd209b     | 7211;NM_CNM_001037fyz.2;uc009   | sculus CD209b antigen (C               | chr8  | 3917654     |
| AK041109   | AK041109 uc009sff.1             | ength enriched library, clone:A53008:  | chr9  | 1.23E+08    |
| Gm9199     | NR_027860 uc011zoh.1            | icted gene 9199 (Gm9199), non-codi     | chr14 | 73025602    |
| Lyz1       | VM_01359VM_01359uc007hdc.2      | usculus lysozyme 1 (Lyz1),             | chr10 | 1.17E+08    |
| Fosl1      | VM_010235VM_010235uc008gdc.1    | ulus fos-like antigen 1 (Fo:           | chr19 | 5447697     |
| Traf1      | .009421;AKVM_009421bjl.1;uc008  | receptor-associated factr              | chr2  | 13257;3494: |
| C5ar1      | 577;NM_00577;NM_00577uc008      | plement component 5a r                 | chr7  | 16246742    |
| Dner       | 1642;NM_152915bsx.1;uc007       | notch-like EGF-related rei             | chr1  | 13943;8436: |
| Bves       | VM_024285VM_024285uc007ezz.1    | od vessel epicardial subst:            | chr10 | 45335761    |
| Itgam      | 189521;AK1082960;NM1082960uc009 | usculus integrin alpha M (             | chr7  | 1.28E+08    |
| Nt5e       | 1143;NM_011851qyj.2;uc008       | us 5' nucleotidase, ecto (Nt5e), mRNA  | chr9  | 88327608    |
| Ccr5       | 0821;NM_CNM_009917joe.1;uc008   | emokine (C-C motif) receptor 5 (Ccr5), | chr9  | 11542;1241: |
| Ntn4       | VM_02132VM_02132uc007gux.2      | nusculus netrin 4 (Ntn4), r            | chr10 | 93641048    |
| Ptprz1     | VM_0010813VM_0010813uc012eim.1  | hosphatase, receptor type Z, polypep   | chr6  | 22875501    |
| Bbc3       | VM_133234VM_133234uc009fho.2    | CL2 binding component :                | chr7  | 16309582    |
| Fabp3      | VM_010174VM_010174uc008uzd.1    | inding protein 3, muscle               | chr4  | 1.3E+08     |
| Sbk2       | VM_0011463VM_0011463uc012exa.1  | ng domain kinase family,               | chr7  | 4957080     |
| Cldn23     | VM_027998VM_027998uc009llc.2    | sculus claudin 23 (Cldn23              | chr8  | 35824708    |
| Slc17a9    | 83161;AK0NM_183161me.1;uc008    | carrier family 17, membe               | chr2  | 16417;1807: |
| C1ql2      | VM_207235VM_207235uc007cjk.1    | component 1, q subcomp                 | chr1  | 1.2E+08     |
| Ltbp2      | 9;AK05298VM_013589uc011ypc.1    | ing growth factor beta binding prote   | chr12 | 17716;8478: |
| Nfe2l3     | 10903;AK0NM_010903bxl.1;uc008   | factor, erythroid derived 2            | chr6  | 51432669    |
| Mocos      | 126779;BC0VM_026779egz.1;uc008  | ybdenum cofactor sulfura               | chr18 | 13690;2465: |
| Apobec1    | 159;NM_00159;NM_00159uc008      | mRNA editing enzyme, ca                | chr6  | 1.23E+08    |
| Dusp8      | VM_008748VM_008748uc009kmo.2    | al specificity phosphatase             | chr7  | 1.42E+08    |
| Cd5l       | VM_00969VM_00969uc008psa.2      | ulus CD5 antigen-like (Cd              | chr3  | 87357880    |
| Nkx1-2     | VM_009125VM_009125uc009kcc.1    | ion factor related, locus 2            | chr7  | 1.33E+08    |
| Hao1       | VM_010405VM_010405uc008mns.1    | ydroxyacid oxidase 1, live             | chr2  | 1.34E+08    |
| Klrk1      | 83322;NM_001083322egh.2;uc008   | lectin-like receptor subfar            | chr6  | 1571;1296:  |
| Pde6g      | 12065;DQ2VM_012065yja.1;uc007   | erase 6G, cGMP-specific,               | chr11 | 1.2E+08     |
| Cd163      | 170395;NM170395;NM170395uc008   | usculus CD163 antigen (C               | chr6  | 1.24E+08    |
| Cited4     | VM_019565VM_019565uc008unl.1    | tivator, with Glu/Asp-rich             | chr4  | 1.21E+08    |
| AK049264   | AK049264 uc008zex.1             | ngth enriched library, clone:93301151  | chr5  | 1.16E+08    |
| Cdh19      | VM_0010813VM_0010813uc007chx.1  | us cadherin 19, type 2 (Cd             | chr1  | 1.11E+08    |

|            |                    |                                                                           |        |       |            |
|------------|--------------------|---------------------------------------------------------------------------|--------|-------|------------|
| Tes        | 07176;BC0NM_207170 | azi.1;uc009is testis derived transcript                                   | 21753  | chr6  | 17065148   |
| Rab32      | NM_026405          | NM_026405uc007ejg.1, member RAS oncogene f                                | 67844  | chr10 | 10545038   |
| Lrrc14b    | NM_00103301        | NM_00103301uc007rfe.1e rich repeat containing 1                           | 432779 | chr13 | 74359581   |
| Syt12      | NM_134164          | NM_134164uc008gad.1ilus synaptotagmin XII (Syt                            | 171180 | chr19 | 4445907    |
| Serpinb2   | NM_00117417        | NM_001174170;NM_001174170uc011wqe.1eine) peptidase inhibitor, clade B, me |        | chr1  | 107511509  |
| Cd83       | NM_00128991        | NM_001289915;NM_001289915uc007qgj.2musculus CD83 antigen (Cd83)           |        | chr13 | 5111;4378  |
| Sema3d     | NM_028882          | NM_028882uc008wly.2main (Ig), short basic dom                             | 108151 | chr5  | 12383165   |
| Timd4      | NM_178755          | NM_178755uc007iox.1;lobulin and mucin domai                               | 276891 | chr11 | 46810798   |
| Mybpc3     | NM_008655          | NM_008655uc033hoe.1in binding protein C, cardi                            | 17868  | chr2  | 91118143   |
| Nupr1      | NM_019738          | NM_019738uc009jsd.1 protein transcription regu                            | 56312  | chr7  | 1.27E+08   |
| Gm9758     | NM_198666          | NM_198666uc008wmm.; predicted gene 9758 (Gn                               | 381714 | chr5  | 14910123   |
| Il1r2      | NM_0011645         | NM_0011645uc011wvi.1ulin-like domain containing receptor                  |        | chr1  | 1.66E+08   |
| Spsb4      | NM_145134          | NM_145134rcy.1;uc009ceptor domain and SOCS                                | 211949 | chr9  | 14048;9694 |
| Mmp24      | NM_010808          | NM_010808uc008nlj.1atrix metalloproteinase 24                             | 17391  | chr2  | 1.56E+08   |
| Dusp4      | NM_176933          | NM_176933uc009lks.1al specificity phosphatase                             | 319520 | chr8  | 34807609   |
| Cdkn1a     | NM_001111099       | NM_001111099;NM_001111099uc008bsg.2;-dependent kinase inhibit             | 12575  | chr17 | 29093771;  |
| Edn1       | NM_010104          | NM_010104uc007qfl.2sculus endothelin 1 (Edn1                              | 13614  | chr13 | 42301269   |
| Fcna       | NM_007999          | NM_007999bsd.1;uc00nuscusculus ficolin A (Fcna), r                        | 14133  | chr2  | 25624666   |
| Cadps      | NM_001042          | NM_001042061;NM_001042061uc007sfw.1a2+-dependent secretion activator (C   |        | chr14 | 2562;1243  |
| Scin       | NM_00132           | NM_00132;NM_00132uc001us musculus scinderin (Sci                          | 20259  | chr12 | 40059770   |
| Insc       | NM_173767          | NM_1737679jik.2;uc00cuteable homolog (Droso                               | 233752 | chr7  | 12061;1147 |
| Srxn1      | NM_029688          | NM_029688uc008new.2doxin 1 homolog (S. cerev                              | 76650  | chr2  | 1.52E+08   |
| Cyr61      | NM_010516          | NM_010516uc008rqg.2cysteine rich protein 61 (                             | 16007  | chr3  | 1.46E+08   |
| Prrg4      | NM_178693          | NM_178693lki.2;uc008i-carboxyglutamic acid) 4                             | 228413 | chr2  | 1.05E+08   |
| Junb       | NM_008416          | NM_008416ghn.2;uc009is jun B proto-oncogene (Junb), mRNA                  |        | chr8  | 4483;8497  |
| Cdkn2b     | NM_00767           | NM_00767uc008tok.2t kinase inhibitor 2B (p15,                             | 12579  | chr4  | 89306288   |
| Slc7a11    | NM_011993          | NM_011993pdj.1;uc009nic amino acid transporte                             | 26570  | chr3  | 14935;5041 |
| Adh7       | NM_009626          | NM_009626uc008rnd.2enase 7 (class IV), mu or s                            | 11529  | chr3  | 1.38E+08   |
| Tfr2       | NM_00509           | NM_00509inc.1;sculus transferrin recepto                                  | 50765  | chr5  | 137570804  |
| Tcte3      | NM_198104          | NM_198104uc029tah.1mplex-associated testis expressed 3 (                  |        | chr17 | 14964188   |
| Klhl30     | NM_027551          | NM_027551uc007cai.1;culus kelch-like 30 (Klhl30                           | 70788  | chr1  | 91351072   |
| Wnt11      | NM_028579          | NM_0285792;NM_0285792uc009ess-related MMTV integra                        | 22411  | chr7  | 18844;9883 |
| Myoz2      | NM_021503          | NM_021503rff.2;uc008sculus myozenin 2 (Myoz2), mRNA                       |        | chr3  | 14042;1230 |
| Gstm3      | NM_010355          | NM_010355uc008qvx.2athione S-transferase, mu                              | 14864  | chr3  | 1.08E+08   |
| A330050F15 | NM_0011451         | NM_0011451uc008dkx.2DNA A330050F15 gene (A                                | 320722 | chr17 | 69439325   |
| Pparg      | NM_127330          | NM_127330;NM_127330uc03ene proliferator activated r                       | 19016  | chr6  | 11220;1154 |
| Ms4a8a     | NM_022430          | NM_022430grp.1;uc009ing 4-domains, subfamily A, member                    |        | chr19 | 15570;1106 |
| Ccl7       | NM_013654          | NM_013654uc007kmq.2emokine (C-C motif) ligan                              | 20306  | chr11 | 82045711   |
| Popdc3     | NM_024286          | NM_024286ezy.1;uc011peye domain containing 3                              | 78977  | chr10 | 45289304   |
| Clic5      | NM_172621          | NM_172621cpw.1;uc00loride intracellular channe                            | 224796 | chr17 | 18571;4423 |
| Tmod1      | NM_021883          | NM_021883stf.1;uc008ilus tropomodulin 1 (Tmod1), mRNA                     |        | chr4  | 19221;4607 |
| Fam26d     | NM_0010811         | NM_0010811uc007eup.1sequence similarity 26, m                             | 270711 | chr10 | 34038783   |
| Trib3      | NM_175093          | NM_175093uc008nff.1)bles homolog 3 (Drosoph                               | 228775 | chr2  | 1.52E+08   |
| Clca2      | NM_030601          | NM_030601uc008rqa.2de channel calcium activa                              | 80797  | chr3  | 1.45E+08   |
| Mmp10      | NM_019471          | NM_019471uc009ocq.2atrix metalloproteinase 10                             | 17384  | chr9  | 7502341    |
| Mybphl     | NM_026831          | NM_026831uc008qyt.1osin binding protein H-lik                             | 68753  | chr3  | 1.08E+08   |
| Arid5a     | NM_145996          | NM_145996uc011wjg.1ch interactive domain 5A (                             | 214855 | chr1  | 36307732   |

|            |                                  |                                                                 |        |       |             |
|------------|----------------------------------|-----------------------------------------------------------------|--------|-------|-------------|
| Hist1h3c   | NM_175653;NM_175653;uc007pur.1   | histone cluster 1, H3c (Hist1h3c)                               | 15077  | chr13 | 23745041    |
| Lrp8       | C127061;AM_0010809               | lac.2;uc008in receptor-related protein 8 (Lrp8)                 | 16975  | chr4  | 107830964   |
| Cxcl1      | NM_008176;NM_008176;uc008ybl.2   | mokine (C-X-C motif) ligand 1 (Cxcl1)                           | 14825  | chr5  | 90891244    |
| BC096410   | BC096410                         | uc007kye.1;culus cDNA clone IMAGE:1548556                       |        | chr11 | 94122816    |
| Slc7a3     | U07593;NM_001007515              | tw.1;uc005onic amino acid transporter 7A3 (Slc7a3)              | 11989  | chrX  | 1.01E+08    |
| Gm5082     | U00114587;145878;NM_0010033glh.1 | ulus predicted gene 5082 (Gm5082)                               |        | chr13 | ;41650761;  |
| Cox6a2     | NM_009943;NM_009943;uc009jyi.1   | c oxidase subunit VIa polypeptide 2 (Cox6a2)                    | 12862  | chr7  | 1.28E+08    |
| H2-M2      | U08204;BC1_001008204             | cmz.1;uc000mpatibility 2, M region locus (H2-M2)                | 14990  | chr17 | ;1225;3748; |
| Cxcl2      | U09140;AK1_001009140             | bn.1;uc008mokine (C-X-C motif) ligand 2 (Cxcl2)                 |        | chr5  | 90903898    |
| Ier3       | NM_133662;NM_133662;uc008cio.1   | mediate early response gene 3 (Ier3)                            | 15937  | chr17 | 35821712    |
| Il1rn      | NM_0011159;NM_0011159;uc008io.2  | interleukin 1 receptor antagonist 1 (Il1rn)                     | 16181  | chr2  | ;24345370;  |
| Inpp5j     | U9;AK165718;NM_172435            | uc029rkf.1; polyphosphate 5-phosphatase 2B (Inpp5j)             | 170835 | chr11 | ;3498949;3; |
| A830018L11 | U23;NM_00100173;NM_0010007ahx.2  | N cDNA A830018L16 gene (A830018L11)                             | 320492 | chr1  | .4104;1159; |
| Rasl10a    | NM_145216;NM_145216;uc007hvs.1   | -like, family 10, member 10 (Rasl10a)                           | 75668  | chr11 | 5058127     |
| A1848285   | U0012070;U0012070                | uc029sua.1;essed sequence A1848285                              | 435145 | chr15 | 82206951    |
| Gsta1      | NM_008181;NM_008181;uc009qtz.1   | ione S-transferase, alpha class 1 (Gsta1)                       | 14857  | chr9  | 78230668    |
| Reg3b      | NM_011036;NM_011036;uc009cju.1   | nerating islet-derived 3 beta (Reg3b)                           | 18489  | chr6  | 78370884    |
| Atf3       | NM_007498;NM_007498;uc011wyt.1   | tivating transcription factor 3 (Atf3)                          | 11910  | chr1  | 1.91E+08    |
| Aldh1l2    | U413;NM_100115354                | gkh.2;uc003hydrogenase 1 family, member L2 (Aldh1l2)            |        | chr10 | ;4741;8348; |
| Ankrd1     | NM_013468;NM_013468;uc008hhh.1   | repeat domain 1 (cardiac repressin) (Ankrd1)                    | 107765 | chr19 | 36111964    |
| D030025P21 | NR_028577                        | uc011ype.130025P21 gene (D030025P21Rik), long isoform           |        | chr12 | 84875801    |
| Hcrtr2     | U98962;AY3_00198962              | qs.1;uc005ocretin (orexin) receptor 2 (Hcrtr2)                  | 387285 | chr9  | ;5879;7622; |
| Chac1      | NM_026929;NM_026929;uc008lts.3   | +, cation transport regulator 1 (Chac1)                         | 69065  | chr2  | 1.19E+08    |
| Ccl2       | NM_011333;NM_011333;uc007kmp.1   | emokine (C-C motif) ligand 2 (Ccl2)                             | 20296  | chr11 | 82035576    |
| Neur13     | U53408;AK0_00153408              | aps.1;uc000l homolog 3 homolog (Drosophila) (Neur13)            | 214854 | chr1  | ;8956;3626; |
| AK084486   | AK084486                         | uc007civ.1;e cDNA, RIKEN full-length enriched library clone     |        | chr1  | 1.2E+08     |
| Cxcl10     | U967;NM_001021274                | ya.2;uc000mokine (C-X-C motif) ligand 10 (Cxcl10)               | 15945  | chr5  | ;6806;9234; |
| Fgf21      | NM_020013;NM_020013;uc009gwe.1   | ibroblast growth factor 21 (Fgf21)                              | 56636  | chr7  | 45613889    |
| Adm2       | NM_182928;NM_182928;uc007xgb.2   | ilus adrenomedullin 2 (Adrenomedullin 2) (Adm2)                 | 223780 | chr15 | 89322898    |
| 1500009C09 | U7697;NR_037698                  | c007wyp.2;uc011N cDNA 1500009C09 gene (1500009C09)              |        | chr15 | ;6022;8225; |
| Cldn4      | NM_009903;NM_009903;uc008zxd.3   | usculus claudin 4 (Cldn4)                                       | 12740  | chr5  | 1.35E+08    |
| Sprr1a     | U7559;NM_001009264               | qed.1;uc033hall proline-rich protein 1A (Sprr1a), rat           |        | chr3  | ;4257;9248; |
| Hrk        | U9236;NM_001007543               | zgg.1;uc03eracting protein (contains proline-rich domain) (Hrk) | 12123  | chr5  | ;9782;1181; |

$FC \geq 0.59$ ) in the *Arid4b* SCKO testes at P1.5.

| end       | djusted P-v | FDR      | log2FC   | iroupe Log2 | Group Log2 | FC (MU/CL)  |
|-----------|-------------|----------|----------|-------------|------------|-------------|
| 93012269  | 0.01525     | 0.14806  | -4.35076 | 3.002402    | 6.634247   | 0.049010555 |
| 18616501  | 0.012759    | 0.14304  | -3.78999 | 0.713146    | 3.93468    | 0.072293512 |
| 72587550  | 0.008338    | 0.1286   | -3.51209 | 4.228549    | 7.159663   | 0.087650828 |
| 75474340  | 0.008944    | 0.13085  | -3.47664 | 6.257947    | 9.205042   | 0.08983098  |
| 45179597  | 0.002738    | 0.10008  | -3.26614 | 0.396429    | 3.395182   | 0.103942541 |
| 13986867  | 0.016436    | 0.15187  | -3.26614 | 0.655354    | 3.262782   | 0.103942541 |
| 89622986  | 0.010331    | 0.13549  | -3.14231 | 5.094583    | 8.076403   | 0.113258474 |
| 41220403  | 0.010681    | 0.13694  | -2.98626 | 8.419046    | 11.37097   | 0.126196304 |
| 78422185  | 0.021056    | 0.16698  | -2.95433 | 5.505549    | 7.950582   | 0.129020253 |
| 17791930  | 0.000667    | 0.079206 | -2.89552 | 0           | 3.173522   | 0.134388733 |
| 68872163  | 0.00787     | 0.1261   | -2.89548 | 6.763314    | 9.189878   | 0.134392413 |
| 1.2E+08   | 0.004461    | 0.10974  | -2.88577 | 0           | 2.584128   | 0.135299689 |
| 3118;6411 | 0.000661    | 0.079206 | -2.87867 | 0           | 2.858163   | 0.135967477 |
| 1.15E+08  | 0.000477    | 0.070995 | -2.8611  | 0           | 3.134778   | 0.137632988 |
| 1.15E+08  | 0.006357    | 0.11846  | -2.80897 | 4.895512    | 7.713331   | 0.142697741 |
| 1.43E+08  | 0.001822    | 0.091058 | -2.80822 | 0           | 2.485882   | 0.14277148  |
| 1595;6501 | 0.03114     | 0.1927   | -2.80822 | 0.655354    | 2.887442   | 0.14277148  |
| 63845176  | 0.003953    | 0.10733  | -2.78381 | 0.396429    | 2.790484   | 0.145207429 |
| 1.08E+08  | 0.002899    | 0.10081  | -2.70506 | 3.155349    | 5.513181   | 0.1533543   |
| 9058;7267 | 0.022993    | 0.17202  | -2.66864 | 6.204321    | 8.575887   | 0.157274528 |
| 80695557  | 0.008946    | 0.13085  | -2.5736  | 4.41311     | 6.873413   | 0.167983992 |
| 9554;2078 | 4E-05       | 0.026776 | -2.56708 | 0           | 2.452489   | 0.168745043 |
| 1.65E+08  | 0.000182    | 0.053538 | -2.56708 | 0           | 2.543534   | 0.168745043 |
| 6908;5653 | 0.003015    | 0.10081  | -2.56708 | 0           | 2.474663   | 0.168745043 |
| 1.55E+08  | 0.014698    | 0.14782  | -2.56708 | 0           | 2.188738   | 0.168745043 |
| 21795185  | 0.003203    | 0.10284  | -2.55421 | 1.229381    | 3.550588   | 0.170257108 |
| 3221015   | 0.01506     | 0.14785  | -2.5369  | 0.396429    | 2.304644   | 0.172312782 |
| 32123702  | 0.016209    | 0.15131  | -2.5369  | 0.396429    | 2.395441   | 0.172312782 |
| 10009130  | 0.0203      | 0.16526  | -2.5369  | 0.431614    | 2.305642   | 0.172312782 |
| 107668968 | 0.002586    | 0.098152 | -2.49776 | 5.529974    | 7.79116    | 0.177051154 |
| 46754314  | 0.005097    | 0.11285  | -2.46339 | 1.591407    | 3.715001   | 0.181320346 |
| 1.12E+08  | 0.026538    | 0.1812   | -2.43265 | 4.838032    | 6.969161   | 0.185225196 |
| 30924181  | 0.004829    | 0.11123  | -2.41538 | 2.996709    | 5.336699   | 0.187454935 |
| 10993250  | 0.036167    | 0.20588  | -2.41401 | 1.159793    | 3.50485    | 0.187633366 |
| 54341777  | 0.006617    | 0.11969  | -2.37358 | 7.295671    | 9.205325   | 0.192966193 |
| 53443576  | 0.033802    | 0.20023  | -2.36805 | 7.252903    | 9.075501   | 0.193707467 |
| 37878944  | 0.0173      | 0.15431  | -2.31797 | 8.611271    | 10.59502   | 0.200549039 |
| 14003533  | 0.00181     | 0.091058 | -2.25078 | 0           | 2.285504   | 0.210110518 |
| 1.82E+08  | 0.009234    | 0.1313   | -2.25078 | 0.396429    | 2.340093   | 0.210110518 |
| 4679;5685 | 0.016454    | 0.15195  | -2.25078 | 0.396429    | 2.193247   | 0.210110518 |
| 1.12E+08  | 0.019689    | 0.16334  | -2.24147 | 2.802189    | 5.016828   | 0.21147108  |
| 8559;4529 | 0.01801     | 0.15697  | -2.23645 | 3.665594    | 6.11638    | 0.212207649 |
| 40466815  | 0.01894     | 0.16013  | -2.2359  | 1.605223    | 3.493268   | 0.212288753 |
| 1184;1717 | 0.000193    | 0.054707 | -2.231   | 0           | 2.082679   | 0.213010693 |

|            |          |          |          |          |          |             |
|------------|----------|----------|----------|----------|----------|-------------|
| 10920601   | 0.000482 | 0.070995 | -2.231   | 0        | 2.192617 | 0.213010693 |
| 1.2E+08    | 0.007007 | 0.12231  | -2.231   | 0        | 1.87327  | 0.213010693 |
| 65223701   | 0.012437 | 0.14213  | -2.231   | 0        | 2.070378 | 0.213010693 |
| .3651;2521 | 0.015567 | 0.14886  | -2.231   | 0.401338 | 2.57402  | 0.213010693 |
| 1.2E+08    | 0.018396 | 0.15788  | -2.231   | 0.396429 | 2.283057 | 0.213010693 |
| 89337007   | 0.021819 | 0.16927  | -2.21372 | 7.509583 | 9.341323 | 0.215577826 |
| 8245;2699  | 0.000106 | 0.043749 | -2.20242 | 0        | 2.081123 | 0.217273221 |
| 99418895   | 0.000555 | 0.073734 | -2.20242 | 0        | 2.19315  | 0.217273221 |
| 1.35E+08   | 0.005833 | 0.11645  | -2.20242 | 0        | 1.868444 | 0.217273221 |
| 1.44E+08   | 0.017013 | 0.15386  | -2.20242 | 0.401338 | 2.081754 | 0.217273221 |
| .0080;1210 | 0.02502  | 0.17768  | -2.19826 | 2.496831 | 4.391036 | 0.217900162 |
| 18152408   | 0.001909 | 0.091058 | -2.1888  | 5.425662 | 7.509415 | 0.219334441 |
| 2994;1963  | 0.026298 | 0.18039  | -2.18545 | 6.69357  | 8.466439 | 0.219843345 |
| 75747922   | 0.023434 | 0.17351  | -2.1803  | 5.862042 | 7.603555 | 0.2206305   |
| 2777;7273  | 0.03201  | 0.19521  | -2.16924 | 3.850563 | 5.653695 | 0.222327008 |
| 1.2E+08    | 0.036824 | 0.20735  | -2.15973 | 5.545713 | 7.376741 | 0.223797645 |
| 1.2E+08    | 0.011316 | 0.13865  | -2.15235 | 1.807082 | 3.708659 | 0.224946376 |
| 1.3E+08    | 0.012984 | 0.1441   | -2.08462 | 1.012072 | 3.320707 | 0.235757632 |
| 45079289   | 0.033055 | 0.19883  | -2.08087 | 10.14038 | 11.84542 | 0.236371184 |
| 99846345   | 0.014861 | 0.14785  | -2.06625 | 3.248327 | 4.888919 | 0.238780019 |
| 1.01E+08   | 0.013108 | 0.14423  | -2.06078 | 10.05508 | 11.99603 | 0.239686035 |
| 2403;3121  | 0.004317 | 0.10962  | -2.04465 | 2.99853  | 4.820218 | 0.242380968 |
| 3623;3764  | 0.002838 | 0.10065  | -2.02955 | 1.453121 | 3.254711 | 0.244931373 |
| 1.93E+08   | 0.001003 | 0.081742 | -2.01574 | 8.713527 | 10.50221 | 0.247287429 |
| 1.31E+08   | 0.000283 | 0.065605 | -1.99367 | 0        | 1.923653 | 0.251098556 |
| 23132986   | 0.022519 | 0.17073  | -1.97247 | 7.338031 | 8.944031 | 0.254816102 |
| ;41105683; | 0.037606 | 0.21001  | -1.95278 | 2.302504 | 4.139575 | 0.258318168 |
| 1.08E+08   | 0.008819 | 0.13079  | -1.95187 | 5.204478 | 7.151197 | 0.258481512 |
| 5469;4564  | 0.03496  | 0.2035   | -1.94397 | 2.539702 | 4.847853 | 0.259900754 |
| 6351;7820  | 0.042138 | 0.22005  | -1.93872 | 1.042348 | 2.974754 | 0.260846915 |
| 1.6E+08    | 0.043607 | 0.22347  | -1.93676 | 4.242372 | 5.963343 | 0.261201672 |
| .2328;1609 | 0.013799 | 0.14588  | -1.91571 | 10.89673 | 12.63036 | 0.265040594 |
| 33147400   | 0.011784 | 0.14024  | -1.90238 | 6.528665 | 8.231151 | 0.267502009 |
| 1.47E+08   | 0.007673 | 0.12553  | -1.89465 | 4.648579 | 6.577916 | 0.26893922  |
| 1.19E+08   | 0.01287  | 0.14327  | -1.87288 | 6.064782 | 8.063182 | 0.273028709 |
| 779;425870 | 0.039796 | 0.21464  | -1.86703 | 0.237957 | 1.992864 | 0.274137837 |
| 7522;7975  | 0.013792 | 0.14588  | -1.86269 | 1.927995 | 3.718034 | 0.2749627   |
| 2984;9092  | 0.019834 | 0.16396  | -1.81243 | 5.617333 | 7.104528 | 0.284711311 |
| 1.08E+08   | 0.000133 | 0.05045  | -1.80995 | 0        | 1.93481  | 0.285200924 |
| 1.64E+08   | 0.001404 | 0.087457 | -1.80995 | 0        | 2.047763 | 0.285200924 |
| 1.4E+08    | 0.021269 | 0.16752  | -1.80995 | 0.396429 | 1.93481  | 0.285200924 |
| 6281861    | 0.021269 | 0.16752  | -1.80995 | 0.396429 | 1.93481  | 0.285200924 |
| 1.2E+08    | 0.022268 | 0.17019  | -1.80995 | 0.401338 | 1.93481  | 0.285200924 |
| .4442;1923 | 0.025275 | 0.17842  | -1.80995 | 0.396429 | 2.047763 | 0.285200924 |
| 1.43E+08   | 0.030044 | 0.18991  | -1.80995 | 0.431614 | 1.935736 | 0.285200924 |
| 1.05E+08   | 0.032665 | 0.19764  | -1.80995 | 0.431614 | 2.047763 | 0.285200924 |
| 87392133   | 0.034834 | 0.20327  | -1.79581 | 1.704255 | 3.189023 | 0.288010048 |

|            |          |          |          |          |          |             |
|------------|----------|----------|----------|----------|----------|-------------|
| 77051992   | 0.002027 | 0.09233  | -1.79206 | 0        | 1.580014 | 0.288758627 |
| 5865;1234  | 0.002027 | 0.09233  | -1.79206 | 0        | 1.580014 | 0.288758627 |
| 1.15E+08   | 0.002027 | 0.09233  | -1.79206 | 0        | 1.580014 | 0.288758627 |
| 34907374   | 0.002027 | 0.09233  | -1.79206 | 0        | 1.580014 | 0.288758627 |
| 34473892   | 0.00589  | 0.11645  | -1.79206 | 0        | 1.726957 | 0.288758627 |
| 58832527   | 0.018398 | 0.15788  | -1.79206 | 0        | 1.930398 | 0.288758627 |
| 63925453   | 0.026147 | 0.18023  | -1.79206 | 0.396429 | 2.048762 | 0.288758627 |
| ;92359468; | 0.00879  | 0.13079  | -1.79013 | 5.791164 | 7.558021 | 0.289145022 |
| 87089928   | 0.043566 | 0.22344  | -1.7786  | 4.232555 | 5.622678 | 0.291465363 |
| 60116669   | 0.001469 | 0.087831 | -1.76626 | 0        | 1.576744 | 0.293970662 |
| 80517260   | 0.001469 | 0.087831 | -1.76626 | 0        | 1.576744 | 0.293970662 |
| 1.07E+08   | 0.001691 | 0.091058 | -1.76626 | 0        | 1.578073 | 0.293970662 |
| 78405657   | 0.004922 | 0.11201  | -1.76626 | 0        | 1.723056 | 0.293970662 |
| 4604041    | 0.010499 | 0.13624  | -1.76626 | 0        | 1.835083 | 0.293970662 |
| ;36644349; | 0.031854 | 0.19474  | -1.76146 | 7.489041 | 8.910298 | 0.294948774 |
| 1546;6587  | 0.009173 | 0.13115  | -1.75798 | 5.843401 | 7.339407 | 0.295662434 |
| 44229617   | 0.010593 | 0.13633  | -1.74337 | 2.235005 | 3.723011 | 0.298670621 |
| ;87805180; | 0.033095 | 0.19884  | -1.74166 | 1.591407 | 3.119827 | 0.299024985 |
| 1931;1135  | 0.038002 | 0.21082  | -1.73983 | 3.547863 | 5.14475  | 0.299405192 |
| 7243;1152  | 0.024668 | 0.17704  | -1.73648 | 5.365854 | 6.69044  | 0.300101816 |
| 80807648   | 0.039802 | 0.21464  | -1.7065  | 12.62813 | 14.25198 | 0.3064028   |
| 1.03E+08   | 0.006682 | 0.11994  | -1.67855 | 5.346725 | 7.04879  | 0.312396618 |
| 50596590   | 0.006769 | 0.12067  | -1.66513 | 5.983385 | 7.33615  | 0.315316493 |
| 93001667   | 0.007767 | 0.12553  | -1.652   | 2.764065 | 4.164586 | 0.318198587 |
| 81802613   | 0.005889 | 0.11645  | -1.6497  | 2.331279 | 3.954968 | 0.318706563 |
| 28120864   | 0.009324 | 0.1313   | -1.64536 | 3.408779 | 5.23439  | 0.319667256 |
| 7397869    | 0.001416 | 0.087457 | -1.64409 | 0        | 1.53735  | 0.319948808 |
| 79662170   | 0.00029  | 0.065605 | -1.63637 | 5.795526 | 7.484508 | 0.321664625 |
| 7350;9434  | 0.005786 | 0.11645  | -1.63546 | 1.229381 | 2.774607 | 0.321867665 |
| 24597009   | 0.030598 | 0.19136  | -1.63546 | 1.453121 | 2.832387 | 0.321867665 |
| ;9936;1421 | 0.037569 | 0.20992  | -1.63546 | 0.832952 | 2.561976 | 0.321867665 |
| 1.23E+08   | 0.000939 | 0.080556 | -1.63523 | 3.775301 | 5.563941 | 0.321919897 |
| 58675696   | 0.010209 | 0.13468  | -1.63523 | 3.839233 | 5.386434 | 0.321919897 |
| 0754;2277  | 0.016283 | 0.15149  | -1.63494 | 3.935702 | 5.269774 | 0.321984797 |
| 87472592   | 0.04343  | 0.22314  | -1.62906 | 11.9597  | 13.18501 | 0.323299726 |
| ;0978;8536 | 0.003744 | 0.10537  | -1.62229 | 6.08259  | 7.536871 | 0.324818556 |
| 78063622   | 0.043604 | 0.22347  | -1.62222 | 6.875909 | 8.163529 | 0.324835571 |
| 7281;1749  | 0.023188 | 0.17257  | -1.62006 | 10.07505 | 11.41558 | 0.325321341 |
| 75177332   | 0.040206 | 0.21567  | -1.61893 | 1.051783 | 2.821984 | 0.325576083 |
| 73710451   | 0.007284 | 0.12439  | -1.61311 | 2.843592 | 4.168921 | 0.326893744 |
| 58286902   | 0.042052 | 0.21992  | -1.61311 | 2.96941  | 4.154114 | 0.326893744 |
| 13421949   | 0.020855 | 0.16625  | -1.6042  | 1.229381 | 2.485882 | 0.328916936 |
| 1.04E+08   | 0.013155 | 0.14423  | -1.60307 | 10.81607 | 12.16418 | 0.329175886 |
| 80058008   | 0.011286 | 0.13856  | -1.58962 | 10.03816 | 11.42765 | 0.332258225 |
| ;0219;1268 | 0.004075 | 0.10822  | -1.57826 | 4.815502 | 6.33209  | 0.334884676 |
| 86718283   | 0.007276 | 0.12439  | -1.5761  | 7.09327  | 8.460314 | 0.335387674 |
| 7412480    | 0.003685 | 0.10503  | -1.57198 | 5.14478  | 6.604324 | 0.336346788 |



|           |          |          |          |          |          |             |
|-----------|----------|----------|----------|----------|----------|-------------|
| 5175;2591 | 0.019291 | 0.16134  | -1.56736 | 7.651096 | 9.120418 | 0.337424636 |
| 38183951  | 0.027791 | 0.18396  | -1.56652 | 2.15962  | 3.770096 | 0.337620645 |
| 1.4E+08   | 0.013282 | 0.1444   | -1.56073 | 5.851773 | 7.538083 | 0.338980255 |
| 2787;1102 | 0.030753 | 0.19145  | -1.55825 | 3.682173 | 5.032299 | 0.339563612 |
| 1.17E+08  | 0.005456 | 0.11563  | -1.55586 | 1.807082 | 3.378486 | 0.340124638 |
| 1.14E+08  | 0.013736 | 0.14588  | -1.55101 | 5.469996 | 6.881482 | 0.341270395 |
| 1.43E+08  | 0.008237 | 0.1283   | -1.54629 | 6.292369 | 8.096108 | 0.342389532 |
| 1.17E+08  | 0.009773 | 0.13301  | -1.52548 | 6.498005 | 7.899168 | 0.347364994 |
| 70212281  | 7.77E-05 | 0.037696 | -1.52129 | 7.46642  | 9.009389 | 0.348373694 |
| 3817;1509 | 0.035237 | 0.20409  | -1.51489 | 2.950544 | 4.476863 | 0.3499222   |
| 4882;3642 | 0.004403 | 0.10974  | -1.51338 | 1.445056 | 2.745468 | 0.350289826 |
| 69888155  | 0.01338  | 0.14479  | -1.51338 | 1.443686 | 2.633441 | 0.350289826 |
| 94812036  | 0.021965 | 0.16957  | -1.51204 | 8.886312 | 10.49182 | 0.350615879 |
| 1.26E+08  | 0.007898 | 0.12631  | -1.50908 | 9.26278  | 10.50481 | 0.351336038 |
| 98357795  | 0.007981 | 0.1267   | -1.50561 | 6.820291 | 8.373868 | 0.352182338 |
| 64089201  | 0.03518  | 0.20409  | -1.50372 | 11.40704 | 12.5951  | 0.352643668 |
| 1.2E+08   | 0.002266 | 0.096252 | -1.49802 | 2.648933 | 4.000566 | 0.354040033 |
| 84011442  | 0.034392 | 0.20183  | -1.49631 | 3.03105  | 4.781114 | 0.35445887  |
| 77893872  | 0.000107 | 0.043749 | -1.48793 | 4.768244 | 6.237558 | 0.356523337 |
| 5682;1419 | 0.000162 | 0.053538 | -1.48526 | 8.681271 | 10.19279 | 0.357183095 |
| 9907;1496 | 0.001321 | 0.086773 | -1.48038 | 2.764065 | 4.287007 | 0.358393907 |
| 9257;1388 | 0.009924 | 0.13347  | -1.47496 | 10.0484  | 11.34796 | 0.359743851 |
| 79628681  | 0.040458 | 0.21624  | -1.47385 | 2.236261 | 3.492123 | 0.360019167 |
| 9334;1587 | 0.005935 | 0.11684  | -1.46238 | 9.498815 | 10.77888 | 0.362893913 |
| 73632421  | 0.016134 | 0.15124  | -1.46212 | 2.539634 | 3.71465  | 0.362958474 |
| 78420286  | 0.029816 | 0.18938  | -1.46071 | 8.355409 | 9.733425 | 0.363314732 |
| 1.21E+08  | 0.024319 | 0.17599  | -1.45981 | 5.692184 | 6.982986 | 0.363540268 |
| 0048;3506 | 0.030394 | 0.19094  | -1.43891 | 2.38336  | 3.551472 | 0.368846365 |
| 1.65E+08  | 0.029396 | 0.18779  | -1.43394 | 1.227747 | 3.352721 | 0.370118598 |
| 4772;1358 | 0.002626 | 0.098152 | -1.43175 | 2.934188 | 4.648314 | 0.370680572 |
| 14063401  | 0.000215 | 0.054854 | -1.42944 | 7.964728 | 9.419867 | 0.371275875 |
| 1.37E+08  | 0.034716 | 0.20291  | -1.42672 | 9.486439 | 10.7206  | 0.371974512 |
| 45347580  | 0.010905 | 0.13733  | -1.42371 | 8.681562 | 10.09588 | 0.372753742 |
| 1.22E+08  | 0.00163  | 0.090935 | -1.4231  | 7.877429 | 9.332271 | 0.372909373 |
| 85389379  | 0.010851 | 0.13733  | -1.41808 | 8.55506  | 9.978935 | 0.374211028 |
| 8841;6118 | 0.006652 | 0.11984  | -1.41734 | 7.09304  | 8.404246 | 0.374402025 |
| 92902906  | 0.00497  | 0.11216  | -1.41683 | 3.012073 | 4.646847 | 0.374535158 |
| 1.06E+08  | 0.000331 | 0.065605 | -1.4151  | 1.883101 | 3.372578 | 0.374983109 |
| 1.59E+08  | 0.03832  | 0.21111  | -1.39868 | 0.797767 | 2.474251 | 0.379276507 |
| 5351035   | 0.037659 | 0.21009  | -1.39548 | 2.74036  | 4.35462  | 0.38011801  |
| 7032;9412 | 0.00961  | 0.1322   | -1.38395 | 1.229381 | 2.685508 | 0.383168399 |
| 1.16E+08  | 0.012887 | 0.14332  | -1.38395 | 1.453121 | 2.730517 | 0.383168399 |
| 83078225  | 0.028961 | 0.18693  | -1.38253 | 2.150581 | 3.196786 | 0.383546497 |
| 9192;1004 | 0.002426 | 0.096556 | -1.37122 | 9.767212 | 11.07019 | 0.386565422 |
| 29230530  | 0.029565 | 0.18844  | -1.36761 | 2.849713 | 4.095789 | 0.387533047 |
| 8442496   | 0.010814 | 0.1373   | -1.36324 | 4.333257 | 5.774753 | 0.388709198 |
| 23895730  | 0.044746 | 0.22642  | -1.36307 | 1.012072 | 2.563982 | 0.38875483  |

|           |          |          |          |          |          |             |
|-----------|----------|----------|----------|----------|----------|-------------|
| 1.29E+08  | 0.005852 | 0.11645  | -1.36135 | 9.525969 | 10.68358 | 0.389219252 |
| 56388551  | 0.043425 | 0.22314  | -1.35885 | 4.480859 | 5.467017 | 0.389891909 |
| 2938;2007 | 0.037608 | 0.21001  | -1.35799 | 3.18014  | 4.330435 | 0.390124297 |
| 23645269  | 0.007947 | 0.12639  | -1.35772 | 3.766044 | 5.085978 | 0.390199431 |
| 6863;8182 | 0.005531 | 0.11593  | -1.35638 | 11.21551 | 12.45852 | 0.390562382 |
| 0063;9971 | 0.03083  | 0.19167  | -1.34858 | 4.37819  | 5.481874 | 0.392679116 |
| 25593936  | 0.020192 | 0.16503  | -1.34761 | 0.828043 | 2.618737 | 0.392942068 |
| 39760938  | 0.038367 | 0.21113  | -1.34761 | 0.828043 | 2.395441 | 0.392942068 |
| 65185870  | 0.012272 | 0.14144  | -1.34063 | 7.028922 | 8.296284 | 0.394847616 |
| 7745;3694 | 0.010541 | 0.13629  | -1.33976 | 4.308297 | 5.496323 | 0.395086185 |
| 78814825  | 0.027186 | 0.18273  | -1.33807 | 8.648531 | 9.706721 | 0.395550423 |
| 61000321  | 0.033538 | 0.19986  | -1.33586 | 2.465263 | 3.897246 | 0.39615558  |
| 1.22E+08  | 0.013632 | 0.14572  | -1.33233 | 10.04209 | 11.10018 | 0.397126149 |
| 74765142  | 0.00947  | 0.13132  | -1.32258 | 2.14367  | 3.372398 | 0.399819892 |
| 102251843 | 0.011484 | 0.13915  | -1.31977 | 9.561363 | 10.77096 | 0.400598222 |
| 34423137  | 0.022076 | 0.16974  | -1.31823 | 8.38571  | 9.582051 | 0.401026693 |
| 5766;5885 | 0.01948  | 0.16236  | -1.30983 | 8.072352 | 9.240116 | 0.403368182 |
| 4401;1226 | 0.003482 | 0.10464  | -1.30933 | 8.332991 | 9.541357 | 0.403507024 |
| 7974;1105 | 0.004727 | 0.11036  | -1.30524 | 7.325696 | 8.492553 | 0.404652547 |
| 99528165  | 0.021695 | 0.16861  | -1.30425 | 5.978982 | 7.057179 | 0.404931027 |
| 84595457  | 0.003952 | 0.10733  | -1.30008 | 2.030822 | 3.352721 | 0.406103506 |
| 27160516  | 0.030527 | 0.19125  | -1.30008 | 1.930375 | 3.320809 | 0.406103506 |
| 98388097  | 0.014634 | 0.14782  | -1.29974 | 8.702846 | 10.23379 | 0.406198352 |
| 1.29E+08  | 0.003242 | 0.10285  | -1.29583 | 7.919536 | 9.345451 | 0.407302717 |
| 14073934  | 0.019495 | 0.16242  | -1.28708 | 3.829819 | 4.882484 | 0.409780146 |
| 75796057  | 0.0003   | 0.065605 | -1.28645 | 8.834882 | 10.13135 | 0.409959822 |
| 3203;7414 | 0.040357 | 0.21591  | -1.27707 | 4.577207 | 5.678347 | 0.412632843 |
| 110381751 | 0.035519 | 0.20491  | -1.27622 | 4.643532 | 5.850477 | 0.412876071 |
| 3407;3483 | 0.004723 | 0.11036  | -1.2743  | 7.71069  | 8.913202 | 0.413427086 |
| 6127;2623 | 0.016304 | 0.15157  | -1.2721  | 2.504127 | 3.967971 | 0.414055261 |
| 104230568 | 0.007532 | 0.12517  | -1.27036 | 6.540288 | 7.68397  | 0.414557518 |
| 1.64E+08  | 0.005591 | 0.11644  | -1.26524 | 3.988258 | 5.218205 | 0.416029073 |
| 1.31E+08  | 0.006807 | 0.12087  | -1.25845 | 1.667426 | 3.055004 | 0.417993145 |
| 1.28E+08  | 0.024559 | 0.1766   | -1.25845 | 1.667426 | 3.362672 | 0.417993145 |
| 1.05E+08  | 0.009169 | 0.13115  | -1.25428 | 7.071154 | 8.486721 | 0.419203597 |
| 1.13E+08  | 0.002349 | 0.096556 | -1.25295 | 9.331665 | 10.6127  | 0.419588134 |
| 28813165  | 0.044433 | 0.22518  | -1.24972 | 4.909307 | 6.124498 | 0.420529051 |
| 59631660  | 0.039974 | 0.21503  | -1.24895 | 9.15883  | 10.14178 | 0.420754519 |
| 8693;4398 | 0.033158 | 0.199    | -1.24874 | 6.288465 | 7.237788 | 0.420815594 |
| 19496760  | 0.029608 | 0.18855  | -1.24046 | 10.51764 | 11.60121 | 0.423237442 |
| 9938;1296 | 0.025273 | 0.17842  | -1.23976 | 8.960751 | 10.03473 | 0.423441812 |
| 1.08E+08  | 0.008434 | 0.12898  | -1.23961 | 1.883101 | 2.964563 | 0.423486876 |
| 0886;1674 | 0.002086 | 0.093854 | -1.23855 | 9.718973 | 10.83674 | 0.423797906 |
| 32036931  | 0.0329   | 0.19842  | -1.23489 | 4.129377 | 5.050367 | 0.424873588 |
| 41069074  | 0.016293 | 0.15152  | -1.23488 | 2.728362 | 3.884145 | 0.42487654  |
| 1.53E+08  | 0.041067 | 0.21761  | -1.2277  | 3.684922 | 4.87358  | 0.426998769 |
| 2707;6541 | 0.040267 | 0.21579  | -1.22707 | 9.795453 | 10.9571  | 0.427183152 |

|             |          |          |          |          |          |             |
|-------------|----------|----------|----------|----------|----------|-------------|
| '9229;1197' | 0.020224 | 0.16517  | -1.22417 | 5.50871  | 6.768223 | 0.428042397 |
| 97033960    | 0.0118   | 0.14024  | -1.22158 | 9.230676 | 10.25649 | 0.428811647 |
| 83588126    | 0.032312 | 0.19635  | -1.21812 | 3.188537 | 4.370635 | 0.429841124 |
| ;10527564;  | 0.016391 | 0.15172  | -1.21746 | 3.292926 | 4.331301 | 0.430037768 |
| 1.2E+08     | 0.026209 | 0.18024  | -1.21575 | 6.057412 | 7.125585 | 0.43055036  |
| 1.56E+08    | 0.00142  | 0.087457 | -1.21484 | 2.648933 | 3.816593 | 0.430819469 |
| 7;6990723;€ | 0.003532 | 0.10464  | -1.21333 | 6.972198 | 8.244928 | 0.431270887 |
| 23560080    | 0.020947 | 0.16668  | -1.20145 | 3.109933 | 4.272124 | 0.43483795  |
| 181720647   | 0.015046 | 0.14785  | -1.19996 | 4.219782 | 5.509672 | 0.435287574 |
| 65393888    | 0.002616 | 0.098152 | -1.19359 | 4.743541 | 5.989096 | 0.437212871 |
| '4085;1723' | 0.028126 | 0.18439  | -1.18978 | 3.653676 | 4.848956 | 0.438368296 |
| 6860940     | 0.011192 | 0.1384   | -1.1891  | 3.168536 | 4.355061 | 0.438576552 |
| ¡4112;4089' | 0.009177 | 0.13115  | -1.1888  | 3.258091 | 4.56649  | 0.438668774 |
| 126583236   | 0.03785  | 0.21062  | -1.18661 | 9.536398 | 10.48102 | 0.43933385  |
| 1.07E+08    | 0.040647 | 0.21675  | -1.1773  | 2.650841 | 3.672108 | 0.442177533 |
| ¡8695;5639! | 0.011972 | 0.14071  | -1.1766  | 13.36297 | 14.3581  | 0.442392431 |
| ¡0800;6644! | 0.030451 | 0.19113  | -1.17658 | 2.91895  | 3.970121 | 0.442399095 |
| 85518935    | 0.002429 | 0.096556 | -1.17191 | 0        | 1.365394 | 0.443832941 |
| 8218839     | 0.003005 | 0.10081  | -1.17191 | 0        | 1.367334 | 0.443832941 |
| 53326266    | 0.003005 | 0.10081  | -1.17191 | 0        | 1.367334 | 0.443832941 |
| 72546279    | 0.003005 | 0.10081  | -1.17191 | 0        | 1.367334 | 0.443832941 |
| 88506049    | 0.003005 | 0.10081  | -1.17191 | 0        | 1.367334 | 0.443832941 |
| 24045949    | 0.003005 | 0.10081  | -1.17191 | 0        | 1.367334 | 0.443832941 |
| 58792019    | 0.003005 | 0.10081  | -1.17191 | 0        | 1.367334 | 0.443832941 |
| 66676497    | 0.011983 | 0.14071  | -1.17191 | 0        | 1.510781 | 0.443832941 |
| 9071076     | 0.011983 | 0.14071  | -1.17191 | 0        | 1.510781 | 0.443832941 |
| 5856142     | 0.02162  | 0.16855  | -1.17191 | 0        | 1.589362 | 0.443832941 |
| 1.81E+08    | 0.039618 | 0.21453  | -1.17075 | 4.170658 | 5.081012 | 0.444189275 |
| 67371502    | 0.030174 | 0.1903   | -1.16807 | 4.275778 | 5.318506 | 0.445016317 |
| 79115099    | 0.002167 | 0.095407 | -1.16715 | 7.071023 | 8.152163 | 0.445299475 |
| 1.19E+08    | 0.040143 | 0.21562  | -1.16533 | 4.490397 | 5.410943 | 0.445863315 |
| 12507704    | 0.022273 | 0.17019  | -1.16529 | 2.898435 | 4.169301 | 0.445876064 |
| 1.71E+08    | 0.008887 | 0.13085  | -1.16501 | 4.107564 | 5.084333 | 0.445961774 |
| 75560330    | 0.004613 | 0.10974  | -1.16445 | 8.951515 | 10.34287 | 0.446133034 |
| ¡8324;3424! | 0.017061 | 0.15392  | -1.16313 | 8.667089 | 9.728885 | 0.446543083 |
| .9699;1002! | 0.013081 | 0.14423  | -1.16288 | 6.922473 | 7.85341  | 0.446621443 |
| 35121931    | 0.005468 | 0.11563  | -1.15963 | 8.645648 | 9.737648 | 0.447626841 |
| 44125179    | 3.14E-08 | 4.38E-05 | -1.15801 | 0        | 1.155984 | 0.448129061 |
| '1707;9607' | 3.14E-08 | 4.38E-05 | -1.15801 | 0        | 1.155984 | 0.448129061 |
| 6478619     | 3.14E-08 | 4.38E-05 | -1.15801 | 0        | 1.155984 | 0.448129061 |
| 37267454    | 3.14E-08 | 4.38E-05 | -1.15801 | 0        | 1.155984 | 0.448129061 |
| 1.23E+08    | 3.14E-08 | 4.38E-05 | -1.15801 | 0        | 1.155984 | 0.448129061 |
| 1.22E+08    | 3.14E-08 | 4.38E-05 | -1.15801 | 0        | 1.155984 | 0.448129061 |
| 1.01E+08    | 3.14E-08 | 4.38E-05 | -1.15801 | 0        | 1.155984 | 0.448129061 |
| 50645838    | 3.14E-08 | 4.38E-05 | -1.15801 | 0        | 1.155984 | 0.448129061 |
| ¡8343;6754! | 3.14E-08 | 4.38E-05 | -1.15801 | 0        | 1.155984 | 0.448129061 |
| 14621284    | 3.14E-08 | 4.38E-05 | -1.15801 | 0        | 1.155984 | 0.448129061 |

|             |          |          |          |          |          |             |
|-------------|----------|----------|----------|----------|----------|-------------|
| 98379108    | 3.14E-08 | 4.38E-05 | -1.15801 | 0        | 1.155984 | 0.448129061 |
| 61835180    | 3.14E-08 | 4.38E-05 | -1.15801 | 0        | 1.155984 | 0.448129061 |
| 98989281    | 3.14E-08 | 4.38E-05 | -1.15801 | 0        | 1.155984 | 0.448129061 |
| 18798510    | 3.14E-08 | 4.38E-05 | -1.15801 | 0        | 1.155984 | 0.448129061 |
| 18789414    | 3.14E-08 | 4.38E-05 | -1.15801 | 0        | 1.155984 | 0.448129061 |
| 1.1E+08     | 3.14E-08 | 4.38E-05 | -1.15801 | 0        | 1.155984 | 0.448129061 |
| '3511;1361' | 0.00344  | 0.10464  | -1.15801 | 0        | 1.368664 | 0.448129061 |
| 30717043    | 0.00344  | 0.10464  | -1.15801 | 0        | 1.368664 | 0.448129061 |
| 35183016    | 0.014581 | 0.14768  | -1.15801 | 0        | 1.515607 | 0.448129061 |
| 8611835     | 0.014581 | 0.14768  | -1.15801 | 0        | 1.515607 | 0.448129061 |
| !1808;7084: | 0.022175 | 0.17002  | -1.15592 | 9.906879 | 11.00044 | 0.448780482 |
| !3966;1538: | 0.022551 | 0.17076  | -1.15373 | 7.386404 | 8.458714 | 0.449462044 |
| 1.53E+08    | 0.028724 | 0.18628  | -1.15133 | 5.872588 | 7.183989 | 0.450209013 |
| 9725352     | 0.039526 | 0.21444  | -1.1507  | 3.090756 | 4.478126 | 0.45040811  |
| 1.2E+08     | 0.005809 | 0.11645  | -1.14998 | 7.121964 | 8.108278 | 0.450631148 |
| ;48445090;  | 0.016808 | 0.15336  | -1.14968 | 8.798419 | 9.723105 | 0.450726072 |
| 28301785    | 0.009466 | 0.13132  | -1.14432 | 2.41115  | 3.882668 | 0.452402947 |
| 1.13E+08    | 0.018418 | 0.15788  | -1.14381 | 2.38336  | 3.577611 | 0.452562614 |
| !7021;4942' | 0.020521 | 0.16539  | -1.14354 | 3.026509 | 4.042438 | 0.452648562 |
| 54554449    | 0.014121 | 0.14652  | -1.14197 | 3.909536 | 4.876545 | 0.453139481 |
| 1.29E+08    | 0.021035 | 0.16694  | -1.14122 | 10.2196  | 11.45799 | 0.453375632 |
| !1977;9507! | 0.040852 | 0.21725  | -1.13928 | 2.612984 | 3.571266 | 0.453987262 |
| '7019;8787' | 0.003947 | 0.10733  | -1.13803 | 0        | 0.989589 | 0.454380225 |
| 1.91E+08    | 0.009214 | 0.13125  | -1.13776 | 10.63411 | 11.61793 | 0.454465994 |
| !9158;3619! | 0.000761 | 0.080556 | -1.13382 | 5.502475 | 6.576697 | 0.455706256 |
| !9914;8627! | 0.001451 | 0.08778  | -1.1337  | 8.256383 | 9.468115 | 0.455743916 |
| 132209546   | 0.010832 | 0.1373   | -1.13186 | 6.556619 | 7.476298 | 0.456325478 |
| 46991714    | 0.027695 | 0.18389  | -1.13154 | 1.967249 | 3.410856 | 0.456428484 |
| 69194658    | 0.03176  | 0.19455  | -1.13144 | 7.790927 | 8.99088  | 0.456458995 |
| 12628488    | 0.043792 | 0.22387  | -1.12459 | 1.930375 | 3.286852 | 0.458632671 |
| !3012;1254' | 0.008613 | 0.13015  | -1.12176 | 8.969762 | 10.15093 | 0.45953374  |
| !2483;4575! | 0.021212 | 0.16752  | -1.12083 | 4.802276 | 5.841529 | 0.459829693 |
| 80700425    | 0.000429 | 0.068927 | -1.1192  | 6.179493 | 7.308335 | 0.460348276 |
| 98898540    | 0.030467 | 0.19118  | -1.11546 | 11.26303 | 12.1277  | 0.461542596 |
| 48294292    | 0.041502 | 0.21852  | -1.11019 | 8.472268 | 9.330065 | 0.463232744 |
| 62231218    | 0.01436  | 0.14729  | -1.11011 | 10.70257 | 11.88122 | 0.463260139 |
| 1.71E+08    | 0.017572 | 0.15566  | -1.1076  | 4.523042 | 5.445158 | 0.464063874 |
| ;70585121;  | 0.011538 | 0.13915  | -1.10646 | 3.705394 | 4.806234 | 0.46443095  |
| 1.03E+08    | 0.016475 | 0.15199  | -1.1042  | 6.424084 | 7.371084 | 0.465161451 |
| 38898160    | 0.00621  | 0.1184   | -1.09626 | 8.512189 | 9.410097 | 0.467728072 |
| 61218416    | 0.042735 | 0.22164  | -1.09583 | 4.851772 | 5.778193 | 0.467866786 |
| 80336441    | 0.001847 | 0.091058 | -1.09558 | 7.436219 | 8.464973 | 0.4679468   |
| 65391652    | 0.010092 | 0.1344   | -1.09542 | 5.309269 | 6.259478 | 0.468001298 |
| 85813585    | 0.010708 | 0.13701  | -1.09401 | 8.215543 | 9.370821 | 0.468456918 |
| 26400456    | 0.02661  | 0.18143  | -1.0934  | 6.209701 | 7.1661   | 0.468655093 |
| ;81796269;  | 0.002238 | 0.096252 | -1.09327 | 12.18282 | 13.34022 | 0.468698635 |
| 1.15E+08    | 0.014341 | 0.14723  | -1.09286 | 3.093521 | 4.007095 | 0.468829501 |

|            |          |          |          |          |          |             |
|------------|----------|----------|----------|----------|----------|-------------|
| 1.16E+08   | 0.009119 | 0.13115  | -1.08788 | 4.653347 | 5.597104 | 0.470453406 |
| 1.19E+08   | 0.034533 | 0.20219  | -1.07941 | 11.88274 | 12.83117 | 0.473223597 |
| 3554;7684; | 0.018777 | 0.15963  | -1.07817 | 8.637775 | 9.852385 | 0.473628437 |
| 6432;4316; | 0.010412 | 0.13607  | -1.07556 | 11.66746 | 12.90277 | 0.474488252 |
| 1.65E+08   | 0.020352 | 0.16528  | -1.07463 | 7.342433 | 8.617002 | 0.474793534 |
| 1.23E+08   | 0.001547 | 0.089465 | -1.07361 | 5.602027 | 6.732301 | 0.475127878 |
| 68347704   | 0.004183 | 0.10876  | -1.07264 | 9.159999 | 10.14589 | 0.475448547 |
| 2511;1882; | 0.011465 | 0.13915  | -1.07226 | 5.144981 | 6.275092 | 0.475572493 |
| 1.81E+08   | 0.007102 | 0.12333  | -1.07044 | 2.030822 | 3.112507 | 0.476173065 |
| 18089190   | 0.042059 | 0.21992  | -1.06841 | 6.36501  | 7.120181 | 0.476843186 |
| 8831;3394; | 0.026765 | 0.18191  | -1.06816 | 6.105345 | 6.99778  | 0.476927553 |
| 5055;1079; | 0.034851 | 0.20331  | -1.06677 | 5.076641 | 5.997636 | 0.477385541 |
| 56472363   | 0.022046 | 0.16962  | -1.0654  | 3.829839 | 5.160666 | 0.477840997 |
| 7910;7976; | 0.042472 | 0.22118  | -1.06537 | 4.804362 | 6.073397 | 0.477851315 |
| 15714214   | 0.016754 | 0.15336  | -1.06198 | 4.458863 | 5.496165 | 0.4789744   |
| ;23634426; | 0.021989 | 0.16959  | -1.06168 | 9.752398 | 10.83445 | 0.479075515 |
| 41059525   | 0.035873 | 0.20565  | -1.06149 | 0.828043 | 2.631038 | 0.479136026 |
| 1.34E+08   | 0.000101 | 0.043205 | -1.05911 | 7.690107 | 8.73046  | 0.479927059 |
| 69836651   | 0.017923 | 0.15672  | -1.05674 | 12.0446  | 13.04195 | 0.480718701 |
| 106672936  | 0.009558 | 0.13188  | -1.05084 | 7.647907 | 8.495055 | 0.482685477 |
| 1.03E+08   | 0.010543 | 0.13629  | -1.04792 | 2.960051 | 4.246554 | 0.483663535 |
| 58758587   | 0.004414 | 0.10974  | -1.04676 | 1.229381 | 2.430891 | 0.484052612 |
| 5477;9960; | 0.03424  | 0.20133  | -1.04676 | 1.453121 | 2.340093 | 0.484052612 |
| 69175540   | 0.039609 | 0.21453  | -1.04172 | 0.797767 | 2.195074 | 0.485749585 |
| 1.51E+08   | 0.023711 | 0.17434  | -1.04113 | 8.929927 | 10.00376 | 0.485947776 |
| 8688;9192; | 0.004378 | 0.10974  | -1.04087 | 3.025355 | 4.061257 | 0.486034603 |
| 1.49E+08   | 0.010678 | 0.13694  | -1.04035 | 2.295772 | 3.476744 | 0.486208742 |
| 86657919   | 0.00226  | 0.096252 | -1.03837 | 8.526679 | 9.544234 | 0.486877168 |
| 74435560   | 0.017092 | 0.15392  | -1.03647 | 5.160322 | 6.295184 | 0.487518352 |
| 9228;3497; | 0.025973 | 0.17971  | -1.03575 | 4.178124 | 5.295721 | 0.487761741 |
| 46431099   | 0.020001 | 0.16463  | -1.03376 | 4.761691 | 5.642385 | 0.488434743 |
| 1.28E+08   | 0.01406  | 0.14644  | -1.03193 | 8.428624 | 9.266581 | 0.489055723 |
| 7837575    | 0.017036 | 0.15392  | -1.02933 | 8.645468 | 9.746738 | 0.489938458 |
| 28547254   | 0.029203 | 0.1876   | -1.0289  | 1.807716 | 3.088104 | 0.490083543 |
| 1.8E+08    | 0.012641 | 0.14286  | -1.02612 | 3.403112 | 4.331856 | 0.491028944 |
| 1.44E+08   | 0.036199 | 0.20595  | -1.0248  | 7.774449 | 8.767739 | 0.491477732 |
| 41124428   | 0.032606 | 0.19739  | -1.0199  | 4.683108 | 5.802775 | 0.493149009 |
| 23520590   | 0.026931 | 0.18258  | -1.01975 | 9.868059 | 10.70997 | 0.493201347 |
| 1.15E+08   | 0.014431 | 0.14768  | -1.01908 | 8.502699 | 9.477447 | 0.493430427 |
| 9164;5639; | 0.020998 | 0.16684  | -1.01689 | 5.663142 | 6.669654 | 0.494181224 |
| 3454169    | 0.019064 | 0.1606   | -1.01006 | 1.807082 | 2.91236  | 0.496524767 |
| 21780554   | 0.039004 | 0.21311  | -1.01006 | 1.820898 | 3.035827 | 0.496524767 |
| 84557823   | 0.003713 | 0.10504  | -1.00907 | 8.503886 | 9.52982  | 0.49686611  |
| ;92139465; | 0.001742 | 0.091058 | -1.00693 | 5.011608 | 6.09375  | 0.497604529 |
| 85196699   | 0.010263 | 0.13492  | -1.00349 | 5.249471 | 6.320155 | 0.498792977 |
| 71810705   | 0.023752 | 0.17439  | -1.00282 | 11.51394 | 12.44713 | 0.499023691 |
| 1.36E+08   | 0.016468 | 0.15199  | -0.98844 | 1.668796 | 2.822342 | 0.504023695 |

|             |          |          |          |          |          |             |
|-------------|----------|----------|----------|----------|----------|-------------|
| 1.08E+08    | 0.005361 | 0.11503  | -0.98524 | 6.575657 | 7.533346 | 0.505142879 |
| 1250;4848   | 0.026248 | 0.18026  | -0.98234 | 4.901085 | 6.135806 | 0.506158335 |
| 35308126    | 0.040989 | 0.21735  | -0.98219 | 4.153694 | 4.958748 | 0.50620973  |
| 6932;6888   | 0.007088 | 0.12331  | -0.98151 | 11.34116 | 12.33011 | 0.506449619 |
| 8718;4367   | 0.040369 | 0.21592  | -0.97749 | 5.644069 | 6.434905 | 0.507863572 |
| 8037;6986   | 0.017754 | 0.15589  | -0.97676 | 7.517993 | 8.41585  | 0.508119818 |
| 8778;6417   | 0.025664 | 0.17945  | -0.97594 | 5.148443 | 5.927608 | 0.508409145 |
| 2480;9310   | 0.00562  | 0.11645  | -0.97412 | 7.4514   | 8.293594 | 0.509051059 |
| 54195034    | 0.003726 | 0.10515  | -0.97392 | 8.417659 | 9.383212 | 0.509120621 |
| 14101494    | 0.000496 | 0.070995 | -0.96987 | 5.98284  | 7.017746 | 0.510552899 |
| 1.23E+08    | 0.018325 | 0.15788  | -0.96853 | 12.74671 | 13.56056 | 0.511027982 |
| 58208808    | 0.033975 | 0.2004   | -0.96852 | 4.189886 | 4.997721 | 0.511030074 |
| 1.34E+08    | 0.041514 | 0.21852  | -0.96653 | 10.98077 | 12.02385 | 0.511733875 |
| 36784962    | 0.015349 | 0.14831  | -0.95953 | 6.184655 | 6.966546 | 0.514225343 |
| 1.36E+08    | 0.000285 | 0.065605 | -0.95924 | 6.20597  | 7.113493 | 0.514327311 |
| 1.31E+08    | 0.033232 | 0.19912  | -0.95878 | 3.979669 | 4.913611 | 0.514492863 |
| 7069;3803   | 0.038216 | 0.21092  | -0.95865 | 6.965291 | 7.843684 | 0.514538305 |
| 5;5645153;5 | 0.001866 | 0.091058 | -0.9582  | 2.179177 | 3.254711 | 0.514698221 |
| 75130883    | 0.00294  | 0.10081  | -0.95718 | 1.883101 | 2.821573 | 0.515062391 |
| 69169791    | 0.012992 | 0.14413  | -0.95687 | 4.237161 | 5.093829 | 0.515173191 |
| 1.22E+08    | 0.035173 | 0.20409  | -0.95594 | 0.876794 | 2.507244 | 0.515506156 |
| 1.07E+08    | 0.039847 | 0.21472  | -0.95523 | 4.469999 | 5.302746 | 0.515760402 |
| 63465502    | 0.01094  | 0.13733  | -0.94892 | 4.593219 | 5.788454 | 0.518019206 |
| 9895;1722   | 0.017672 | 0.15566  | -0.94887 | 5.555146 | 6.389346 | 0.518036283 |
| 29332742    | 0.022106 | 0.16991  | -0.94788 | 4.049836 | 4.833686 | 0.518392868 |
| ;59318412;  | 0.033768 | 0.20023  | -0.94441 | 7.411759 | 8.292698 | 0.5196406   |
| 6710;1052   | 0.015409 | 0.1486   | -0.93585 | 7.461643 | 8.420442 | 0.522732645 |
| 43838218    | 0.042809 | 0.22164  | -0.93287 | 2.728362 | 3.617547 | 0.523815381 |
| 118728438   | 0.031948 | 0.19503  | -0.93176 | 6.247158 | 7.233236 | 0.524217799 |
| .2653;1628  | 0.001424 | 0.087457 | -0.92544 | 3.752271 | 4.838155 | 0.526518344 |
| 4730;1358   | 0.033542 | 0.19986  | -0.92483 | 10.60103 | 11.41259 | 0.526740777 |
| 88548279    | 0.023587 | 0.1741   | -0.92425 | 5.118976 | 6.146328 | 0.526953675 |
| 76177259    | 0.008837 | 0.13079  | -0.92292 | 7.307102 | 8.21489  | 0.52743915  |
| 1.19E+08    | 0.0243   | 0.17599  | -0.92062 | 5.215157 | 5.929865 | 0.528282324 |
| 53978673    | 0.002906 | 0.10081  | -0.92052 | 4.33585  | 5.441629 | 0.528319256 |
| 58907126    | 0.037678 | 0.21009  | -0.91879 | 4.691018 | 5.747552 | 0.528953553 |
| 84935083    | 0.027542 | 0.18363  | -0.91689 | 3.705841 | 4.668913 | 0.529649653 |
| 1.44E+08    | 0.003608 | 0.10464  | -0.91478 | 10.4264  | 11.42348 | 0.530424258 |
| 0741;1073   | 0.034442 | 0.20204  | -0.91058 | 8.416152 | 9.10875  | 0.53197033  |
| 83955205    | 0.020209 | 0.16511  | -0.90805 | 3.304435 | 4.122625 | 0.532903176 |
| 75510354    | 0.035717 | 0.20536  | -0.90687 | 13.64011 | 14.54893 | 0.533341093 |
| 1.21E+08    | 0.001682 | 0.091058 | -0.90535 | 4.617372 | 5.508532 | 0.533902987 |
| 69605960    | 0.009931 | 0.13347  | -0.90232 | 11.98946 | 13.11089 | 0.53502388  |
| 98923942    | 0.001038 | 0.083045 | -0.90111 | 8.640748 | 9.512827 | 0.535474434 |
| 66050386    | 0.001385 | 0.087457 | -0.89724 | 9.091996 | 10.06126 | 0.536913298 |
| ;63565520;  | 0.015079 | 0.14785  | -0.89617 | 11.73802 | 12.62549 | 0.537311702 |
| ;84410038;  | 0.000137 | 0.051052 | -0.89484 | 9.48146  | 10.36715 | 0.537806053 |

|             |          |          |          |          |          |             |
|-------------|----------|----------|----------|----------|----------|-------------|
| 1.35E+08    | 0.004899 | 0.11201  | -0.89427 | 10.37984 | 11.35655 | 0.5380175   |
| 1120;1217   | 0.031483 | 0.19417  | -0.89317 | 4.190055 | 5.034662 | 0.53843077  |
| 48877713    | 0.044299 | 0.22477  | -0.89221 | 4.33916  | 5.574866 | 0.538789283 |
| 2198;9448   | 0.012024 | 0.14084  | -0.89078 | 4.745333 | 5.668286 | 0.539323883 |
| ;66385919;  | 0.01642  | 0.15182  | -0.89072 | 9.314312 | 10.32794 | 0.539344011 |
| '1988;1193' | 0.008918 | 0.13085  | -0.89058 | 8.144804 | 9.106964 | 0.539397784 |
| ;89926740;  | 0.006269 | 0.1184   | -0.88994 | 5.579139 | 6.340828 | 0.539634781 |
| 58958355    | 0.000359 | 0.065605 | -0.88534 | 5.633427 | 6.569915 | 0.541358868 |
| 69237022    | 0.030407 | 0.19097  | -0.88087 | 3.609712 | 4.392763 | 0.543039161 |
| 23905343    | 0.039132 | 0.21345  | -0.88053 | 9.646402 | 10.4493  | 0.543167265 |
| 35865400    | 0.014129 | 0.14652  | -0.87609 | 8.948617 | 9.726933 | 0.54484118  |
| '0228;1075' | 0.002571 | 0.098108 | -0.87597 | 7.912818 | 8.815298 | 0.544886167 |
| '7338;6013' | 0.018987 | 0.16022  | -0.87466 | 12.23889 | 13.12468 | 0.545381429 |
| 43615892    | 0.043232 | 0.22285  | -0.87367 | 3.3563   | 4.472166 | 0.545756184 |
| '4540;9684' | 0.017087 | 0.15392  | -0.87104 | 4.478686 | 5.381721 | 0.546752673 |
| 37255738    | 0.037286 | 0.20889  | -0.87101 | 8.256462 | 9.034813 | 0.546764084 |
| '1502;6530' | 0.01742  | 0.15509  | -0.87082 | 6.748741 | 7.43666  | 0.546837332 |
| 00412;1000' | 0.009558 | 0.13188  | -0.86904 | 12.0984  | 12.91263 | 0.547509559 |
| 89792662    | 0.036304 | 0.2062   | -0.86795 | 3.751074 | 4.423187 | 0.547925764 |
| 80724216    | 0.011664 | 0.13974  | -0.86725 | 6.457403 | 7.348242 | 0.548189795 |
| 70755151    | 0.012258 | 0.14144  | -0.86627 | 2.295772 | 3.372142 | 0.548562716 |
| 14621778    | 0.012816 | 0.14304  | -0.86584 | 8.359805 | 9.387295 | 0.548725315 |
| 1.2E+08     | 0.027691 | 0.18389  | -0.86481 | 5.413484 | 6.153816 | 0.549119512 |
| 43205755    | 0.005812 | 0.11645  | -0.86343 | 5.253355 | 5.974095 | 0.54964338  |
| 87759364    | 0.002519 | 0.097168 | -0.86304 | 8.954437 | 9.809909 | 0.549792863 |
| ;59134436;  | 0.005085 | 0.1127   | -0.86266 | 8.870749 | 9.798044 | 0.549938168 |
| 05729;7097' | 0.029854 | 0.18947  | -0.86253 | 7.557962 | 8.43334  | 0.549987531 |
| 36488171    | 0.007016 | 0.12231  | -0.86176 | 3.168536 | 3.931055 | 0.550281082 |
| '7803;1355' | 0.024179 | 0.17574  | -0.86176 | 3.103241 | 4.006133 | 0.550281082 |
| '9624;3594' | 0.021034 | 0.16694  | -0.85731 | 4.984596 | 5.674498 | 0.551981018 |
| 1.4E+08     | 0.01258  | 0.14266  | -0.85028 | 6.221566 | 7.088857 | 0.554677956 |
| 41743856    | 0.000752 | 0.080556 | -0.84999 | 4.628286 | 5.425456 | 0.554789427 |
| 117549359   | 0.00572  | 0.11645  | -0.84993 | 7.992976 | 8.776374 | 0.554811808 |
| 10706696    | 0.042697 | 0.22163  | -0.84756 | 9.070773 | 9.741347 | 0.555723734 |
| 1.14E+08    | 0.003325 | 0.10378  | -0.84523 | 6.434905 | 7.204125 | 0.556623409 |
| 58214892    | 0.001187 | 0.084659 | -0.8443  | 9.684413 | 10.54722 | 0.556979114 |
| 100879283   | 0.001818 | 0.091058 | -0.84288 | 4.699551 | 5.466323 | 0.557530664 |
| ;43326556;  | 0.037353 | 0.20916  | -0.84133 | 6.074801 | 6.725602 | 0.558127158 |
| ;92371036;  | 0.004436 | 0.10974  | -0.84017 | 7.204293 | 8.097636 | 0.55857844  |
| ;59036441;  | 0.003405 | 0.10463  | -0.83962 | 12.33857 | 13.2124  | 0.55878882  |
| 127330836   | 0.020841 | 0.16625  | -0.83944 | 4.576312 | 5.358575 | 0.558859756 |
| 1.16E+08    | 0.024964 | 0.17766  | -0.8382  | 3.312573 | 4.173913 | 0.559342683 |
| '2422;4506' | 0.031395 | 0.19379  | -0.83745 | 8.30157  | 8.990583 | 0.55963112  |
| 47247991    | 0.014186 | 0.14659  | -0.83426 | 8.659787 | 9.552883 | 0.560871018 |
| '7011;6251' | 0.004556 | 0.10974  | -0.83358 | 3.805092 | 4.596027 | 0.561134917 |
| 97986446    | 0.043367 | 0.22314  | -0.83318 | 7.964106 | 8.776291 | 0.561291321 |
| 1.21E+08    | 0.008904 | 0.13085  | -0.8326  | 3.548399 | 4.355568 | 0.561517802 |

|             |          |          |          |          |          |             |
|-------------|----------|----------|----------|----------|----------|-------------|
| 73546395    | 0.021275 | 0.16752  | -0.83251 | 4.013532 | 4.917508 | 0.561553266 |
| 135593893   | 0.003944 | 0.10733  | -0.83083 | 3.246421 | 4.233338 | 0.562203959 |
| 1.68E+08    | 0.031597 | 0.19428  | -0.82911 | 3.663627 | 4.623906 | 0.562877746 |
| 17339;1277  | 0.01021  | 0.13468  | -0.82848 | 9.757367 | 10.64074 | 0.563120789 |
| 46375254    | 0.015021 | 0.14785  | -0.82747 | 6.708025 | 7.483129 | 0.563516409 |
| 106417;2680 | 0.030689 | 0.19145  | -0.82696 | 7.497778 | 8.237916 | 0.563717302 |
| 18164;5419  | 0.013818 | 0.14588  | -0.82694 | 2.648687 | 3.4771   | 0.563722778 |
| 17065;1033  | 0.031846 | 0.19474  | -0.82649 | 2.728362 | 3.789836 | 0.56390013  |
| 54085552    | 0.039651 | 0.21453  | -0.82556 | 7.261617 | 7.915749 | 0.564261505 |
| 1.27E+08    | 0.02036  | 0.16528  | -0.82508 | 3.579356 | 4.388281 | 0.564449159 |
| 1.34E+08    | 0.001451 | 0.08778  | -0.82478 | 7.905817 | 8.8281   | 0.564568439 |
| 43807461    | 0.014968 | 0.14785  | -0.82361 | 9.462246 | 10.26452 | 0.565026489 |
| 1.52E+08    | 0.003455 | 0.10464  | -0.82316 | 6.824529 | 7.581676 | 0.56520276  |
| 17449;7313  | 0.032266 | 0.19613  | -0.82246 | 3.609467 | 4.441517 | 0.565476367 |
| 17661;1160  | 0.005843 | 0.11645  | -0.81657 | 5.987127 | 6.6975   | 0.567788593 |
| 1.2E+08     | 0.023008 | 0.17202  | -0.81623 | 12.40071 | 13.2008  | 0.567925393 |
| 14826;6574  | 0.008533 | 0.12945  | -0.81395 | 10.38346 | 11.22843 | 0.568822355 |
| 31229511    | 0.011397 | 0.13865  | -0.8132  | 7.67723  | 8.451435 | 0.569118331 |
| 74717065    | 0.027916 | 0.18402  | -0.8112  | 2.535463 | 3.25494  | 0.569908249 |
| 145685883;  | 0.018864 | 0.15986  | -0.80986 | 5.164654 | 6.331578 | 0.570437806 |
| 91045729    | 0.02675  | 0.18187  | -0.80986 | 5.474517 | 6.173793 | 0.570437806 |
| 94798289    | 0.000171 | 0.053538 | -0.80712 | 7.367746 | 8.140542 | 0.571521909 |
| 18193;9816  | 0.006464 | 0.11897  | -0.80705 | 8.771716 | 9.625703 | 0.571549792 |
| 1.37E+08    | 0.001963 | 0.091857 | -0.8044  | 6.79276  | 7.512431 | 0.572601042 |
| 74295950    | 0.008834 | 0.13079  | -0.80414 | 2.648687 | 3.378734 | 0.572704152 |
| 184588638;  | 0.025446 | 0.17877  | -0.80399 | 11.16947 | 11.87927 | 0.57276226  |
| 11836;1294  | 0.038787 | 0.2126   | -0.80315 | 9.434657 | 10.30265 | 0.573095667 |
| 37841872    | 0.013305 | 0.14451  | -0.80301 | 7.120369 | 7.859696 | 0.573152395 |
| 10701;8759  | 0.001932 | 0.091726 | -0.80298 | 6.124696 | 7.027312 | 0.57316461  |
| 8056555     | 0.019295 | 0.16134  | -0.80284 | 9.033881 | 9.70777  | 0.573219858 |
| 75084905    | 0.039299 | 0.21399  | -0.80112 | 5.644379 | 6.704327 | 0.573904405 |
| 1.07E+08    | 0.01699  | 0.15386  | -0.79785 | 4.886985 | 5.879391 | 0.57520423  |
| 31327302    | 0.030728 | 0.19145  | -0.79747 | 3.787311 | 4.714937 | 0.57535558  |
| 1.36E+08    | 0.014211 | 0.14665  | -0.79561 | 4.292119 | 5.351001 | 0.576098013 |
| 1.27E+08    | 0.007216 | 0.1238   | -0.79423 | 8.12489  | 8.921674 | 0.576651807 |
| 15819;1369  | 0.011175 | 0.13837  | -0.79385 | 5.390768 | 6.282861 | 0.576801016 |
| 16464;1571  | 0.011245 | 0.13856  | -0.79257 | 5.797832 | 6.767485 | 0.577314628 |
| 17103;7303  | 0.001509 | 0.088641 | -0.79238 | 6.667732 | 7.414765 | 0.577390812 |
| 13793520    | 0.017849 | 0.15635  | -0.7922  | 4.25384  | 5.072715 | 0.577460917 |
| 11521;2521  | 0.018962 | 0.16013  | -0.79205 | 4.911154 | 5.621505 | 0.577523372 |
| 45639501    | 0.034397 | 0.20183  | -0.7918  | 7.144688 | 8.353411 | 0.577624894 |
| 16545;8444  | 0.022458 | 0.17073  | -0.79094 | 5.693509 | 6.41322  | 0.577968198 |
| 85688254    | 0.017588 | 0.15566  | -0.79006 | 3.97645  | 4.735337 | 0.578320384 |
| 1.34E+08    | 0.015188 | 0.148    | -0.78961 | 9.918255 | 10.67076 | 0.578502249 |
| 9967485     | 0.013832 | 0.14588  | -0.78944 | 8.527731 | 9.221289 | 0.578570355 |
| 46728342    | 0.029897 | 0.18963  | -0.78931 | 7.254249 | 7.907493 | 0.578621917 |
| 1.06E+08    | 0.002487 | 0.097011 | -0.78799 | 8.800637 | 9.5476   | 0.579150413 |



|             |          |          |          |          |          |             |
|-------------|----------|----------|----------|----------|----------|-------------|
| 80260968    | 0.020884 | 0.16635  | -0.78684 | 9.324505 | 9.995889 | 0.579612276 |
| ;13020505;  | 0.010848 | 0.13733  | -0.78443 | 8.686101 | 9.303613 | 0.580583125 |
| 0086;6845   | 0.016278 | 0.15149  | -0.78432 | 4.845365 | 5.584587 | 0.580623993 |
| 1.23E+08    | 0.002313 | 0.096369 | -0.78341 | 6.9474   | 7.825521 | 0.580991226 |
| ;3851;2845  | 0.004696 | 0.11016  | -0.78309 | 8.558675 | 9.423145 | 0.581121246 |
| 86011860    | 0.044152 | 0.22455  | -0.78132 | 2.933774 | 4.086317 | 0.581834305 |
| 2005;5942   | 0.007653 | 0.12553  | -0.78024 | 7.187025 | 7.938383 | 0.582269018 |
| ;5223;2346  | 0.037066 | 0.20829  | -0.77969 | 4.761719 | 5.605411 | 0.582493958 |
| 8280176     | 0.027078 | 0.1827   | -0.77876 | 10.22853 | 11.1191  | 0.582867143 |
| 20746404    | 0.00115  | 0.084257 | -0.77754 | 9.09069  | 9.857976 | 0.583361759 |
| 5891;7591   | 0.005907 | 0.11668  | -0.77622 | 6.055884 | 6.736342 | 0.583894519 |
| ;7933;8394  | 0.011471 | 0.13915  | -0.77471 | 12.31183 | 13.13428 | 0.58450626  |
| 84030295    | 0.011941 | 0.14071  | -0.77422 | 6.629937 | 7.362885 | 0.584705727 |
| 48805505    | 0.017957 | 0.15672  | -0.77326 | 5.085254 | 5.755174 | 0.58509324  |
| 22657231    | 0.016369 | 0.15172  | -0.77312 | 5.266117 | 5.942216 | 0.585150115 |
| 88000356    | 0.012778 | 0.14304  | -0.77243 | 10.01326 | 10.78751 | 0.585428829 |
| 127059031   | 0.019941 | 0.16448  | -0.77225 | 9.880518 | 10.51078 | 0.585502752 |
| 33125659    | 0.008264 | 0.12847  | -0.77185 | 8.468706 | 9.209397 | 0.585665103 |
| '2372;7467  | 0.028076 | 0.18433  | -0.77044 | 5.402676 | 6.067919 | 0.586240672 |
| ;87729934;  | 0.012586 | 0.14266  | -0.77012 | 5.078508 | 5.962676 | 0.58637024  |
| 6072;9225   | 0.008939 | 0.13085  | -0.76933 | 9.334782 | 9.981348 | 0.586690932 |
| 123313373   | 0.014509 | 0.14768  | -0.76864 | 8.674085 | 9.333695 | 0.586971709 |
| 80247102    | 0.02498  | 0.17766  | -0.76769 | 4.217926 | 5.055311 | 0.587355184 |
| 89362613    | 0.023965 | 0.17505  | -0.76748 | 12.33858 | 13.18866 | 0.587442201 |
| 75314871    | 0.008656 | 0.13027  | -0.76728 | 4.513222 | 5.315283 | 0.587525268 |
| 98437716    | 0.016355 | 0.15167  | -0.76082 | 10.93425 | 11.77163 | 0.590161948 |
| 1562;1915   | 0.010938 | 0.13733  | -0.76019 | 10.68402 | 11.34289 | 0.5904203   |
| 84682923    | 0.006043 | 0.11769  | -0.75789 | 3.496533 | 4.272124 | 0.591360466 |
| .7240;1114  | 0.011047 | 0.13797  | -0.75503 | 7.643926 | 8.436571 | 0.592535829 |
| 20241358    | 0.043191 | 0.22277  | -0.75465 | 5.917035 | 6.511971 | 0.592688424 |
| 4634;1489   | 0.016819 | 0.15336  | -0.75399 | 10.49269 | 11.18878 | 0.592963156 |
| ;28815617;  | 0.039639 | 0.21453  | -0.75244 | 4.046666 | 4.884901 | 0.593599424 |
| ;7473;9207  | 0.015051 | 0.14785  | -0.75241 | 9.150904 | 9.819065 | 0.593610716 |
| 95306585    | 0.032429 | 0.19661  | -0.75126 | 6.751185 | 7.40192  | 0.594086433 |
| 94944578    | 0.013444 | 0.14498  | -0.75092 | 11.08036 | 12.03562 | 0.594226192 |
| 3052;9589   | 0.003338 | 0.1039   | -0.75066 | 9.226475 | 9.971859 | 0.594332268 |
| 1.28E+08    | 0.010925 | 0.13733  | -0.74989 | 3.600966 | 4.491738 | 0.59464937  |
| 93975470    | 0.025865 | 0.17955  | -0.74869 | 12.3702  | 13.17953 | 0.595145351 |
| );3863903;3 | 0.010086 | 0.1344   | -0.74772 | 4.274766 | 4.990887 | 0.595543224 |
| 8451;1162   | 0.041169 | 0.21779  | -0.74681 | 8.416038 | 9.198512 | 0.59591992  |
| 42158695    | 0.029691 | 0.18886  | -0.7468  | 3.66911  | 4.44035  | 0.595922976 |
| .0996;8482  | 0.003548 | 0.10464  | -0.74559 | 11.34204 | 12.07027 | 0.596425828 |
| 8687;1029   | 0.023896 | 0.17492  | -0.745   | 5.078228 | 5.896285 | 0.596665836 |
| 6115555     | 0.014193 | 0.1466   | -0.74479 | 3.075429 | 3.891896 | 0.596753357 |
| 1.29E+08    | 0.033639 | 0.19991  | -0.74452 | 3.078671 | 3.859132 | 0.596866665 |
| 9519;1494   | 0.003593 | 0.10464  | -0.74426 | 3.29897  | 3.987658 | 0.59697371  |
| 77979667    | 0.00771  | 0.12553  | -0.74401 | 9.07505  | 9.789342 | 0.597077632 |

|             |          |          |          |          |          |             |
|-------------|----------|----------|----------|----------|----------|-------------|
| ;65239049;  | 0.00747  | 0.1247   | -0.74287 | 9.289663 | 9.997305 | 0.597548236 |
| 33243312    | 0.00321  | 0.10284  | -0.74198 | 10.84759 | 11.59439 | 0.597918339 |
| 24725825    | 0.039519 | 0.21444  | -0.7404  | 2.183558 | 2.897667 | 0.59857404  |
| !6415;5120! | 0.013474 | 0.14502  | -0.74018 | 8.042553 | 8.702354 | 0.598666256 |
| 95654771    | 0.043391 | 0.22314  | -0.73953 | 4.674443 | 5.37609  | 0.598934682 |
| 1.36E+08    | 0.018509 | 0.15822  | -0.73863 | 10.53442 | 11.1663  | 0.599309871 |
| !5567;1036! | 0.037374 | 0.20922  | -0.73749 | 3.344871 | 4.158034 | 0.599780867 |
| 77243639    | 0.019515 | 0.16242  | -0.73748 | 4.809049 | 5.74975  | 0.599786392 |
| !4154;9785! | 0.020143 | 0.16503  | -0.73518 | 5.675445 | 6.30775  | 0.600741375 |
| !0810;6118! | 0.00779  | 0.12553  | -0.73488 | 1.659361 | 2.563982 | 0.60086735  |
| 1.17E+08    | 0.018335 | 0.15788  | -0.73488 | 1.667426 | 2.655028 | 0.60086735  |
| 45659309    | 0.018955 | 0.16013  | -0.73488 | 1.667426 | 2.563982 | 0.60086735  |
| 74885408    | 0.023044 | 0.17202  | -0.73488 | 1.659361 | 2.452489 | 0.60086735  |
| 91807393    | 0.005102 | 0.11285  | -0.73448 | 5.270941 | 5.945123 | 0.601035249 |
| ;69287728;  | 0.002107 | 0.094053 | -0.72602 | 9.074033 | 9.833423 | 0.604568704 |
| 25469749    | 0.033391 | 0.19949  | -0.72541 | 11.13636 | 11.99432 | 0.604825516 |
| !;4893086;! | 0.017128 | 0.15392  | -0.72486 | 8.051608 | 8.625625 | 0.605054566 |
| 64098038    | 0.024118 | 0.17556  | -0.72482 | 6.26488  | 6.997278 | 0.605072412 |
| ;34222357;  | 0.027293 | 0.18299  | -0.72461 | 6.108682 | 6.833496 | 0.605159891 |
| 1.75E+08    | 0.001647 | 0.090935 | -0.72401 | 4.867907 | 5.606969 | 0.605413872 |
| };4597989;! | 0.008433 | 0.12898  | -0.72324 | 9.977937 | 10.77337 | 0.605737011 |
| 75267762    | 0.0193   | 0.16134  | -0.72324 | 10.74143 | 11.49206 | 0.605737645 |
| ;90763947;  | 0.013841 | 0.14588  | -0.72281 | 9.917057 | 10.67373 | 0.605915808 |
| 58379264    | 0.001249 | 0.086071 | -0.72265 | 4.592913 | 5.286361 | 0.605981254 |
| 153529971   | 0.020705 | 0.16612  | -0.72265 | 9.600733 | 10.32447 | 0.60598518  |
| 1.1E+08     | 0.011594 | 0.13937  | -0.72141 | 3.247152 | 3.891639 | 0.606504523 |
| !5238;4022! | 0.028656 | 0.18598  | -0.72141 | 3.226549 | 3.844905 | 0.606504523 |
| 85806851    | 0.005111 | 0.11285  | -0.72024 | 6.793856 | 7.489586 | 0.606995574 |
| !1365;8101! | 0.000603 | 0.075866 | -0.72014 | 6.750548 | 7.47336  | 0.607036669 |
| '7355;1305! | 0.001574 | 0.089465 | -0.71951 | 9.344602 | 10.09874 | 0.607301906 |
| !3692;7428' | 0.010559 | 0.13629  | -0.71886 | 10.33534 | 11.04035 | 0.607577243 |
| 1.06E+08    | 0.035409 | 0.20459  | -0.71727 | 6.481208 | 7.131637 | 0.608246181 |
| 70659738    | 0.011583 | 0.13937  | -0.71699 | 10.7538  | 11.37608 | 0.608366359 |
| 1.23E+08    | 0.017454 | 0.15533  | -0.71611 | 8.072828 | 8.665598 | 0.608735721 |
| 6172991     | 0.025462 | 0.17877  | -0.71552 | 5.893131 | 6.535637 | 0.608984425 |
| !5351;4760! | 0.003165 | 0.10245  | -0.71411 | 10.62709 | 11.37613 | 0.609581936 |
| !5447;1323! | 0.008393 | 0.12892  | -0.71316 | 5.485625 | 6.406723 | 0.609981142 |
| 1.21E+08    | 0.019814 | 0.16386  | -0.71175 | 5.296297 | 6.017176 | 0.610579816 |
| 90528835    | 0.010036 | 0.13397  | -0.70751 | 2.932378 | 3.628899 | 0.612378036 |
| 92956051    | 0.038066 | 0.21083  | -0.70689 | 9.965282 | 10.50063 | 0.612638323 |
| 59585223    | 0.020676 | 0.16594  | -0.7047  | 1.659361 | 2.451955 | 0.613571355 |
| !2479;7023! | 0.027931 | 0.18402  | -0.70246 | 4.772716 | 5.471399 | 0.614525464 |
| ;53240111;  | 0.02329  | 0.17308  | -0.70222 | 6.053835 | 6.706887 | 0.614625501 |
| 1.09E+08    | 0.041548 | 0.21852  | -0.70168 | 7.965836 | 8.556584 | 0.614856764 |
| !1023;6075! | 0.000734 | 0.080556 | -0.70038 | 8.795091 | 9.521894 | 0.61540986  |
| 7872042     | 0.001602 | 0.090483 | -0.69862 | 9.610718 | 10.27441 | 0.616160808 |
| 1.32E+08    | 0.004695 | 0.11016  | -0.69821 | 1.229381 | 1.98106  | 0.616335375 |

|           |          |          |          |          |          |             |
|-----------|----------|----------|----------|----------|----------|-------------|
| 1.05E+08  | 0.001807 | 0.091058 | -0.69815 | 3.547911 | 4.21277  | 0.616361683 |
| 56947429  | 0.019078 | 0.1606   | -0.69806 | 7.908805 | 8.530676 | 0.616401751 |
| 1.52E+08  | 0.003696 | 0.10504  | -0.69771 | 11.7746  | 12.51685 | 0.616550254 |
| 44020006  | 0.031573 | 0.19428  | -0.6976  | 4.296659 | 5.158446 | 0.616598553 |
| 1.01E+08  | 0.023852 | 0.17475  | -0.69731 | 7.122545 | 7.770362 | 0.616720593 |
| 57962865  | 0.041547 | 0.21852  | -0.69464 | 11.68812 | 12.34383 | 0.617865526 |
| 6834;5968 | 0.016935 | 0.15378  | -0.69434 | 6.328864 | 6.933991 | 0.617991057 |
| 1.37E+08  | 0.041981 | 0.2198   | -0.69422 | 2.651463 | 3.594863 | 0.618044281 |
| 54920146  | 0.001216 | 0.085631 | -0.69277 | 9.063407 | 9.770234 | 0.618663879 |
| 31520670  | 0.008512 | 0.12942  | -0.69238 | 10.56875 | 11.21313 | 0.618832906 |
| 1.09E+08  | 0.040091 | 0.21547  | -0.69156 | 6.120216 | 6.781764 | 0.619183887 |
| 9710;4558 | 0.027876 | 0.18402  | -0.6908  | 11.027   | 11.57502 | 0.619510237 |
| 8621567;8 | 0.008621 | 0.1302   | -0.69057 | 11.07563 | 11.67019 | 0.619609657 |
| 47848298; | 0.006286 | 0.1184   | -0.68949 | 9.831599 | 10.38649 | 0.620073293 |
| 9175;1228 | 0.02479  | 0.17746  | -0.68867 | 12.12534 | 12.67658 | 0.620423428 |
| 5637;8255 | 0.007401 | 0.1247   | -0.68768 | 8.495549 | 9.265113 | 0.620852992 |
| 1.57E+08  | 0.025368 | 0.17845  | -0.68682 | 3.234688 | 4.079205 | 0.62122138  |
| 1.08E+08  | 0.029392 | 0.18779  | -0.68612 | 5.997975 | 6.613183 | 0.621522763 |
| 1.64E+08  | 0.003905 | 0.10733  | -0.6854  | 7.690872 | 8.28482  | 0.621834472 |
| 6436;9177 | 0.026257 | 0.18027  | -0.68424 | 7.351248 | 8.103002 | 0.622333291 |
| 54503768  | 0.023557 | 0.17405  | -0.68208 | 9.215477 | 10.11848 | 0.623267401 |
| 38960585  | 0.035274 | 0.20418  | -0.6819  | 7.414139 | 8.077629 | 0.623342641 |
| 19619830  | 0.004924 | 0.11201  | -0.68168 | 9.992712 | 10.56395 | 0.623439055 |
| 1.39E+08  | 0.00637  | 0.11848  | -0.67857 | 9.346276 | 10.01328 | 0.624785254 |
| 98974942  | 0.011392 | 0.13865  | -0.67823 | 10.17049 | 11.04479 | 0.624931204 |
| 44983787  | 0.0045   | 0.10974  | -0.67778 | 11.34172 | 11.99879 | 0.625128039 |
| 1.23E+08  | 0.016225 | 0.15133  | -0.6765  | 6.73839  | 7.43769  | 0.625682096 |
| 61993259; | 0.025129 | 0.17806  | -0.67565 | 10.62384 | 11.35995 | 0.626048013 |
| 24475469  | 0.013704 | 0.1458   | -0.67532 | 7.229082 | 7.87338  | 0.626191884 |
| 174822729 | 0.02739  | 0.18328  | -0.67445 | 5.698336 | 6.441482 | 0.626571841 |
| 25785209  | 0.006584 | 0.11943  | -0.67344 | 9.924489 | 10.49529 | 0.627008604 |
| 1.25E+08  | 0.038361 | 0.21113  | -0.67307 | 4.266213 | 4.825416 | 0.627171175 |
| 69801625  | 0.011491 | 0.13915  | -0.67093 | 7.332528 | 7.874799 | 0.628100667 |
| 1.46E+08  | 0.005322 | 0.11503  | -0.66723 | 8.080468 | 8.654316 | 0.629715093 |
| 88177785  | 0.009416 | 0.1313   | -0.66606 | 5.111842 | 5.774087 | 0.630225436 |
| 97738247  | 0.022459 | 0.17073  | -0.66576 | 5.401397 | 6.174418 | 0.630356071 |
| 53867080  | 0.022802 | 0.17141  | -0.66575 | 6.554898 | 7.084783 | 0.630362879 |
| 124261103 | 0.041713 | 0.21913  | -0.66562 | 8.704233 | 9.224586 | 0.630418341 |
| 17766207  | 0.00134  | 0.086936 | -0.66514 | 9.535566 | 10.22713 | 0.630626165 |
| 67283361  | 0.01287  | 0.14327  | -0.66377 | 3.351069 | 4.291812 | 0.631227613 |
| 74641516  | 0.006041 | 0.11769  | -0.6637  | 5.986637 | 6.691645 | 0.631255685 |
| 1.42E+08  | 0.012557 | 0.14266  | -0.66347 | 3.875848 | 4.477876 | 0.631359485 |
| 1.06E+08  | 0.036416 | 0.2064   | -0.6633  | 3.292926 | 3.883985 | 0.631430509 |
| 83038448  | 0.012312 | 0.14156  | -0.66304 | 4.769835 | 5.354245 | 0.631546537 |
| 48541800  | 0.008384 | 0.12888  | -0.66217 | 9.360261 | 9.940399 | 0.631926536 |
| 1.15E+08  | 0.024778 | 0.17743  | -0.66065 | 11.68313 | 12.20807 | 0.632594661 |
| 24063116  | 0.012157 | 0.14107  | -0.66005 | 6.849222 | 7.645328 | 0.632855983 |

|            |          |          |          |          |          |             |
|------------|----------|----------|----------|----------|----------|-------------|
| 1.2E+08    | 0.026451 | 0.18099  | -0.65999 | 9.058805 | 9.92535  | 0.632881329 |
| 1.88E+08   | 0.023158 | 0.17253  | -0.65911 | 5.405954 | 6.007426 | 0.633266713 |
| 10477;5168 | 0.006115 | 0.11773  | -0.65857 | 11.1493  | 11.71385 | 0.633505722 |
| 1.18E+08   | 0.005167 | 0.11319  | -0.65741 | 9.018349 | 9.584279 | 0.634016153 |
| 1.71E+08   | 0.035736 | 0.20536  | -0.6567  | 5.238326 | 6.008346 | 0.634329335 |
| 75895941   | 0.038183 | 0.2109   | -0.65484 | 7.313553 | 8.168006 | 0.635147249 |
| 1.43E+08   | 0.01077  | 0.13708  | -0.65465 | 7.737567 | 8.40416  | 0.635228063 |
| 76319820   | 0.001569 | 0.089465 | -0.65332 | 10.42396 | 11.12    | 0.635815633 |
| 1.53E+08   | 0.018411 | 0.15788  | -0.65255 | 8.186092 | 8.693534 | 0.636155627 |
| 13452;5321 | 0.027963 | 0.18402  | -0.65189 | 11.77842 | 12.63741 | 0.636447842 |
| 16021;2108 | 0.011984 | 0.14071  | -0.65167 | 9.456242 | 10.12398 | 0.63654438  |
| 69758223   | 0.04135  | 0.21803  | -0.65135 | 11.64921 | 12.14246 | 0.636686229 |
| 141830538  | 0.025655 | 0.17945  | -0.65127 | 6.516628 | 7.071393 | 0.636718288 |
| 1.32E+08   | 0.02919  | 0.1876   | -0.65081 | 9.198998 | 9.828011 | 0.636921566 |
| 10421;3026 | 0.018467 | 0.15804  | -0.64775 | 8.38123  | 8.999327 | 0.638275807 |
| 1.14E+08   | 0.025847 | 0.17955  | -0.6469  | 10.00446 | 10.5798  | 0.638649651 |
| 19080;7335 | 0.010604 | 0.13633  | -0.64606 | 11.30204 | 11.917   | 0.639023449 |
| 14756;9592 | 0.039757 | 0.2146   | -0.64574 | 5.679692 | 6.228852 | 0.639165492 |
| 1.23E+08   | 0.004708 | 0.11027  | -0.64532 | 9.41141  | 10.01681 | 0.639352189 |
| 19216;4479 | 0.007216 | 0.1238   | -0.6434  | 5.715346 | 6.529008 | 0.640204188 |
| 56378470   | 0.033872 | 0.20023  | -0.64333 | 7.162207 | 7.812943 | 0.640231288 |
| 18973;1084 | 0.044242 | 0.22474  | -0.64277 | 7.23583  | 7.697901 | 0.640481544 |
| 96223738   | 0.000922 | 0.080556 | -0.64258 | 7.586807 | 8.216139 | 0.640567454 |
| 18115;1318 | 0.000891 | 0.080556 | -0.64068 | 7.178012 | 7.806685 | 0.641410886 |
| 17917;3487 | 0.001894 | 0.091058 | -0.64018 | 10.14788 | 10.75052 | 0.641634503 |
| 64022059   | 0.004572 | 0.10974  | -0.64003 | 7.545571 | 8.245278 | 0.641700487 |
| 11219;4554 | 0.022303 | 0.17036  | -0.64002 | 9.321804 | 9.843734 | 0.641705467 |
| 13958;1082 | 0.003324 | 0.10378  | -0.63817 | 13.41923 | 14.21437 | 0.642527475 |
| 14100;7504 | 0.013476 | 0.14502  | -0.63812 | 7.584555 | 8.31664  | 0.642549378 |
| 90146827   | 0.013074 | 0.14423  | -0.63617 | 6.323473 | 6.901666 | 0.64341939  |
| 81753275   | 0.000518 | 0.072364 | -0.63514 | 7.368074 | 7.995528 | 0.643877726 |
| 1.2E+08    | 0.005326 | 0.11503  | -0.63495 | 7.203477 | 7.77025  | 0.643963221 |
| 150280036  | 0.004165 | 0.10876  | -0.63488 | 4.563871 | 5.308854 | 0.643996261 |
| 15822;7969 | 0.006327 | 0.11846  | -0.63462 | 8.700143 | 9.426999 | 0.644108239 |
| 1.36E+08   | 0.015297 | 0.1481   | -0.63187 | 7.750158 | 8.291623 | 0.64533801  |
| 1.3E+08    | 0.038968 | 0.21311  | -0.62855 | 10.39984 | 10.95046 | 0.646823953 |
| 11830;8299 | 0.008081 | 0.12765  | -0.62828 | 8.751919 | 9.532694 | 0.646946965 |
| 28831747   | 0.0031   | 0.10176  | -0.62718 | 6.709191 | 7.459257 | 0.647441621 |
| 87404495   | 0.000141 | 0.051751 | -0.62624 | 7.680354 | 8.284279 | 0.64786355  |
| 47014850   | 0.008323 | 0.12856  | -0.62611 | 6.675665 | 7.312359 | 0.647920687 |
| 18420;1374 | 0.01272  | 0.14304  | -0.62355 | 6.993666 | 7.679927 | 0.649070008 |
| 138134135  | 0.001733 | 0.091058 | -0.62331 | 7.771809 | 8.357249 | 0.6491805   |
| 15748;6313 | 0.00296  | 0.10081  | -0.62307 | 8.344303 | 8.944615 | 0.649287881 |
| 1.41E+08   | 0.020847 | 0.16625  | -0.62274 | 3.985956 | 4.79807  | 0.649437194 |
| 154026044  | 0.007616 | 0.12553  | -0.6213  | 10.20066 | 10.83224 | 0.650084092 |
| 1.01E+08   | 0.02517  | 0.17823  | -0.62123 | 9.286999 | 9.933759 | 0.650116109 |
| 18027;8512 | 0.008049 | 0.12727  | -0.61971 | 7.006195 | 7.660828 | 0.650799683 |

|             |          |          |          |          |          |             |
|-------------|----------|----------|----------|----------|----------|-------------|
| .8797;7562! | 0.000145 | 0.052352 | -0.61881 | 9.497131 | 10.10774 | 0.65120599  |
| 49500250    | 0.023294 | 0.17308  | -0.6165  | 5.701481 | 6.5363   | 0.652251981 |
| 132802764   | 0.017279 | 0.1542   | -0.61649 | 9.01061  | 9.65134  | 0.65225678  |
| ;38535291;  | 0.009428 | 0.13132  | -0.61585 | 10.80512 | 11.30318 | 0.652545874 |
| !1743;1207! | 0.0043   | 0.10962  | -0.61567 | 9.801408 | 10.35944 | 0.652626767 |
| 1.54E+08    | 0.042513 | 0.22119  | -0.61541 | 9.709257 | 10.22066 | 0.65274595  |
| 76003569    | 0.039287 | 0.21398  | -0.6149  | 4.969579 | 5.479024 | 0.652973608 |
| ;62971990;  | 0.002839 | 0.10065  | -0.6144  | 8.584108 | 9.139966 | 0.653200949 |
| !5320;5942! | 0.021833 | 0.16928  | -0.61396 | 5.615005 | 6.175263 | 0.653401797 |
| 1.82E+08    | 0.021332 | 0.16763  | -0.61331 | 8.804544 | 9.620243 | 0.653694622 |
| 1.57E+08    | 0.00388  | 0.10717  | -0.61291 | 9.976074 | 10.58689 | 0.653876169 |
| !3436;1218! | 0.012796 | 0.14304  | -0.61278 | 3.748051 | 4.271941 | 0.653934442 |
| !9417;1545! | 0.028516 | 0.18568  | -0.61177 | 9.635338 | 10.21502 | 0.654392933 |
| 6054751     | 0.03674  | 0.20701  | -0.61144 | 7.414238 | 8.271401 | 0.654543024 |
| !8904;9705! | 0.004922 | 0.11201  | -0.61072 | 8.538548 | 9.098421 | 0.654868892 |
| 1.22E+08    | 0.043191 | 0.22277  | -0.60977 | 6.447269 | 6.902907 | 0.655299883 |
| ;38512763;  | 0.030586 | 0.19136  | -0.6094  | 10.07357 | 10.59541 | 0.655467779 |
| 128103047   | 0.001738 | 0.091058 | -0.60883 | 8.5281   | 9.213959 | 0.655728879 |
| 35581115    | 0.043857 | 0.2241   | -0.60653 | 5.054563 | 5.821748 | 0.656774324 |
| 1.43E+08    | 0.026863 | 0.18219  | -0.60637 | 11.5972  | 12.17054 | 0.656847552 |
| 79697704    | 0.009165 | 0.13115  | -0.60628 | 7.98533  | 8.689642 | 0.656889637 |
| 62605140    | 0.0336   | 0.19991  | -0.60618 | 3.470124 | 4.142976 | 0.656935079 |
| 35881119    | 0.009639 | 0.1322   | -0.60593 | 1.229381 | 1.935736 | 0.657045889 |
| 84597032    | 0.009639 | 0.1322   | -0.60593 | 1.229381 | 1.935736 | 0.657045889 |
| 80398216    | 0.035425 | 0.20459  | -0.60593 | 1.229381 | 2.047763 | 0.657045889 |
| !4524;8451! | 0.014468 | 0.14768  | -0.60576 | 7.012377 | 7.58308  | 0.657126501 |
| 20727556    | 0.000322 | 0.065605 | -0.60451 | 7.984714 | 8.586459 | 0.657696679 |
| 121533365   | 0.013169 | 0.14423  | -0.60431 | 9.08823  | 9.620596 | 0.657784409 |
| !0265;2560! | 0.027902 | 0.18402  | -0.60281 | 10.7484  | 11.4638  | 0.658470354 |
| 57512788    | 0.000991 | 0.081742 | -0.6028  | 4.799856 | 5.390253 | 0.6584737   |
| 1.22E+08    | 0.035385 | 0.20459  | -0.60179 | 7.970852 | 8.440633 | 0.65893418  |
| !7136;8925! | 0.001078 | 0.083992 | -0.60104 | 6.534739 | 7.129049 | 0.659277727 |
| ;77945888;  | 0.001695 | 0.091058 | -0.60058 | 6.52121  | 7.242155 | 0.659489174 |
| 25831843    | 0.008093 | 0.12771  | -0.60033 | 8.988269 | 9.507808 | 0.659603493 |
| 1.05E+08    | 0.03654  | 0.20658  | -0.59949 | 7.960652 | 8.638157 | 0.659988856 |
| !7775;1233! | 0.002452 | 0.096556 | -0.59934 | 5.554945 | 6.160531 | 0.66005792  |
| ;52120959;  | 0.015069 | 0.14785  | -0.59872 | 11.45134 | 12.00377 | 0.660340969 |
| ;52005714;  | 0.025115 | 0.17806  | -0.59859 | 7.826857 | 8.40417  | 0.660399626 |
| 1.03E+08    | 0.004072 | 0.10822  | -0.59852 | 7.830856 | 8.430454 | 0.660430335 |
| !1461;2195! | 0.013226 | 0.14423  | -0.59832 | 8.163678 | 8.673139 | 0.66052344  |
| 108858613   | 0.021641 | 0.1686   | -0.59779 | 2.648687 | 3.196913 | 0.660766115 |
| 73097592    | 0.005552 | 0.11617  | -0.59734 | 8.261367 | 8.764437 | 0.660970909 |
| 1.4E+08     | 0.019983 | 0.16463  | -0.5962  | 5.814113 | 6.411171 | 0.661495    |
| 98169765    | 0.032055 | 0.19529  | -0.59538 | 5.690543 | 6.298697 | 0.661872248 |
| 79694012    | 0.014482 | 0.14768  | -0.59436 | 7.878231 | 8.650131 | 0.662340113 |
| 110768139   | 0.014826 | 0.14785  | -0.59348 | 8.658645 | 9.346309 | 0.662741555 |
| 1.3E+08     | 0.042543 | 0.22129  | -0.58934 | 9.271136 | 9.735768 | 0.664645069 |

|            |          |          |          |          |          |             |
|------------|----------|----------|----------|----------|----------|-------------|
| '0276;5606 | 0.010006 | 0.13381  | -0.5889  | 10.1431  | 10.69658 | 0.664850779 |
| 55174990   | 9.28E-05 | 0.041446 | -0.58805 | 1.229381 | 1.789423 | 0.665242124 |
| 42846261   | 0.00045  | 0.070821 | -0.58805 | 1.229381 | 1.763264 | 0.665242124 |
| .8392;7172 | 0.002734 | 0.10008  | -0.58741 | 6.81428  | 7.313786 | 0.665537187 |
| 1.44E+08   | 0.016345 | 0.15167  | -0.58741 | 6.760295 | 7.268442 | 0.665537187 |
| 36773457   | 0.00931  | 0.1313   | -0.58643 | 9.190338 | 9.822369 | 0.665988911 |
| 38226735   | 0.02993  | 0.18967  | -0.58574 | 2.179177 | 3.088104 | 0.666308821 |
| :3050;9503 | 0.005179 | 0.11321  | -0.5851  | 7.873044 | 8.534257 | 0.66660428  |
| 34336599   | 0.006413 | 0.11859  | 0.585289 | 10.23254 | 9.641843 | 1.500339195 |
| 27822915   | 0.015229 | 0.14806  | 0.585542 | 6.522788 | 6.01034  | 1.50060259  |
| 1.08E+08   | 0.007594 | 0.12553  | 0.585582 | 13.51057 | 12.9744  | 1.500644124 |
| 36767578   | 0.00072  | 0.080556 | 0.585587 | 13.0405  | 12.46387 | 1.500649135 |
| 1.44E+08   | 0.012569 | 0.14266  | 0.586363 | 10.16399 | 9.546292 | 1.501456644 |
| 31458901   | 0.028299 | 0.18506  | 0.587047 | 9.390116 | 8.907489 | 1.502168894 |
| 1.05E+08   | 0.004204 | 0.10876  | 0.587308 | 8.052933 | 7.432251 | 1.502441026 |
| 55532475   | 0.002598 | 0.098152 | 0.588551 | 10.18512 | 9.54099  | 1.503735486 |
| :1113;1391 | 0.0255   | 0.17891  | 0.588799 | 11.53591 | 11.02577 | 1.5039944   |
| 1.3E+08    | 0.001745 | 0.091058 | 0.590075 | 13.13723 | 12.54202 | 1.505325129 |
| :6519;1388 | 0.026721 | 0.18172  | 0.590141 | 8.430099 | 7.878124 | 1.505393995 |
| 24603817   | 0.006521 | 0.11911  | 0.591149 | 12.21927 | 11.65102 | 1.506446162 |
| 80175119   | 0.013149 | 0.14423  | 0.591178 | 6.356072 | 5.764259 | 1.506476139 |
| 79527739   | 0.037263 | 0.20881  | 0.591897 | 11.00228 | 10.40955 | 1.50722744  |
| '7324;5377 | 0.010985 | 0.13768  | 0.592105 | 9.240192 | 8.742088 | 1.507444297 |
| .5997;4705 | 0.01976  | 0.16372  | 0.592285 | 7.680026 | 7.17649  | 1.507633179 |
| 55488076   | 0.009376 | 0.1313   | 0.593201 | 11.60849 | 11.02173 | 1.50859063  |
| 57231466   | 0.010697 | 0.13699  | 0.593228 | 10.42077 | 9.915965 | 1.508618381 |
| 25081114   | 0.002939 | 0.10081  | 0.597069 | 9.584184 | 9.072578 | 1.512640018 |
| 36736604   | 0.025722 | 0.17945  | 0.597518 | 7.979756 | 7.430314 | 1.513111643 |
| 1.2E+08    | 0.009009 | 0.13115  | 0.597809 | 11.47975 | 10.85107 | 1.513416684 |
| 35058719   | 0.001134 | 0.083992 | 0.598296 | 12.52239 | 11.93856 | 1.513927038 |
| 16895435   | 0.007483 | 0.12482  | 0.598402 | 5.779897 | 5.210464 | 1.514039087 |
| :7106;5442 | 0.008319 | 0.12856  | 0.598541 | 10.54    | 10.00353 | 1.514184368 |
| 1.18E+08   | 0.001726 | 0.091058 | 0.598781 | 10.2066  | 9.586658 | 1.514436918 |
| 55240058   | 0.002026 | 0.09233  | 0.598783 | 7.754517 | 7.183802 | 1.514438231 |
| 75551946   | 0.000785 | 0.080556 | 0.60003  | 10.56769 | 9.98058  | 1.51574822  |
| 1.34E+08   | 0.007941 | 0.12639  | 0.600102 | 6.829385 | 6.299009 | 1.515823947 |
| 1.1E+08    | 0.023605 | 0.1741   | 0.600241 | 7.763531 | 7.044575 | 1.515969886 |
| 40588463   | 0.025019 | 0.17768  | 0.601919 | 11.33888 | 10.82271 | 1.517734034 |
| 78984924   | 0.040349 | 0.21591  | 0.602479 | 9.909885 | 9.321258 | 1.518322861 |
| ;89510859; | 0.016885 | 0.1537   | 0.602726 | 8.905086 | 8.387737 | 1.518583021 |
| 25704996   | 0.01394  | 0.14629  | 0.603045 | 9.458413 | 8.84548  | 1.518918789 |
| :3312;8850 | 0.008929 | 0.13085  | 0.603149 | 11.50344 | 10.85121 | 1.519028974 |
| :4863;3538 | 0.029204 | 0.1876   | 0.60356  | 8.871837 | 8.357681 | 1.519461673 |
| 16455490   | 0.003145 | 0.10234  | 0.603997 | 8.19186  | 7.551403 | 1.519921465 |
| :0457;8135 | 0.002451 | 0.096556 | 0.604039 | 10.15986 | 9.635956 | 1.519966081 |
| 1.47E+08   | 0.030581 | 0.19136  | 0.606624 | 10.64992 | 10.09259 | 1.522691529 |
| 1.18E+08   | 0.004699 | 0.11016  | 0.60732  | 11.16231 | 10.38628 | 1.523426924 |

|            |          |          |          |          |          |             |
|------------|----------|----------|----------|----------|----------|-------------|
| 1.21E+08   | 0.005745 | 0.11645  | 0.607529 | 9.422725 | 8.862246 | 1.523647619 |
| 1.04E+08   | 0.008817 | 0.13079  | 0.608023 | 10.69996 | 10.13945 | 1.524168735 |
| 1.8E+08    | 0.007826 | 0.12576  | 0.6086   | 12.75555 | 11.99603 | 1.524778356 |
| 34178172   | 0.017626 | 0.15566  | 0.610362 | 8.802648 | 8.301707 | 1.52664192  |
| 1.42E+08   | 0.003566 | 0.10464  | 0.611155 | 11.46513 | 10.84506 | 1.527481112 |
| 1.7E+08    | 0.027732 | 0.18394  | 0.612212 | 10.29478 | 9.845111 | 1.528600916 |
| 50732773   | 0.036117 | 0.20585  | 0.613717 | 8.501909 | 7.79992  | 1.530196823 |
| 13496;1190 | 0.0004   | 0.067603 | 0.614256 | 10.36201 | 9.754985 | 1.530768775 |
| 28766524   | 0.003642 | 0.10469  | 0.614776 | 8.781125 | 8.12386  | 1.531320528 |
| 57892418   | 0.003934 | 0.10733  | 0.61529  | 11.94324 | 11.38319 | 1.53186591  |
| 101785310  | 0.023788 | 0.17454  | 0.616292 | 9.221617 | 8.53143  | 1.532930552 |
| 18544;7284 | 0.009884 | 0.13332  | 0.617136 | 4.129377 | 3.436513 | 1.533827242 |
| 1.29E+08   | 0.037108 | 0.20832  | 0.617156 | 8.504469 | 7.940061 | 1.533848613 |
| 54986336   | 0.022851 | 0.17157  | 0.619145 | 8.737994 | 8.211535 | 1.535964512 |
| 138175305  | 0.028787 | 0.18639  | 0.61925  | 7.19504  | 6.574046 | 1.536076711 |
| 1.26E+08   | 0.007495 | 0.12491  | 0.620476 | 11.62659 | 10.95163 | 1.53738237  |
| 15299;9610 | 0.023004 | 0.17202  | 0.620689 | 11.19528 | 10.5884  | 1.537609155 |
| 55513446   | 0.00513  | 0.11314  | 0.620771 | 11.37918 | 10.74876 | 1.537696934 |
| 15834;6948 | 0.017719 | 0.15571  | 0.62314  | 12.69618 | 12.11639 | 1.540223978 |
| 49196251   | 0.006053 | 0.11771  | 0.623455 | 10.08498 | 9.403312 | 1.54056011  |
| 96306121   | 0.034535 | 0.20219  | 0.623758 | 4.189755 | 3.577418 | 1.540883983 |
| 35490873   | 0.000378 | 0.066968 | 0.623814 | 11.14518 | 10.50466 | 1.540943695 |
| 42958732   | 0.014873 | 0.14785  | 0.624599 | 8.169989 | 7.614498 | 1.541782176 |
| 1.31E+08   | 0.005058 | 0.11266  | 0.625443 | 12.41993 | 11.76878 | 1.542684384 |
| 164830129  | 0.042347 | 0.22068  | 0.62545  | 9.516329 | 8.979673 | 1.542691485 |
| 1.25E+08   | 0.006466 | 0.11897  | 0.628271 | 11.61776 | 10.93208 | 1.545711633 |
| 26182351   | 0.008121 | 0.12784  | 0.628949 | 9.565682 | 8.917887 | 1.546438532 |
| 95324358   | 0.028517 | 0.18568  | 0.630304 | 2.535463 | 1.580014 | 1.547890618 |
| 16768;5479 | 0.006497 | 0.11911  | 0.630483 | 8.181184 | 7.542659 | 1.54808289  |
| 70506739   | 0.004617 | 0.10974  | 0.633519 | 9.273452 | 8.538731 | 1.551344293 |
| 13011;4148 | 0.003086 | 0.10151  | 0.633807 | 10.63095 | 10.00657 | 1.551654446 |
| 31253197   | 0.009389 | 0.1313   | 0.633863 | 5.940123 | 5.259624 | 1.551714692 |
| 91070221   | 0.001779 | 0.091058 | 0.634429 | 9.619555 | 8.997942 | 1.552323654 |
| 15414;4044 | 0.034993 | 0.20361  | 0.634677 | 6.232512 | 5.692657 | 1.552590373 |
| 1.44E+08   | 0.017779 | 0.15598  | 0.636925 | 12.27707 | 11.77222 | 1.555011415 |
| 70453726   | 0.005637 | 0.11645  | 0.63765  | 9.603171 | 8.893708 | 1.555792778 |
| 1.64E+08   | 0.016157 | 0.15124  | 0.637968 | 9.673227 | 8.991204 | 1.556136173 |
| 35679449   | 0.018631 | 0.15908  | 0.638768 | 9.030513 | 8.443093 | 1.556998739 |
| 1.66E+08   | 0.002389 | 0.096556 | 0.639556 | 10.55938 | 9.804472 | 1.557850176 |
| 10391005   | 0.00194  | 0.091726 | 0.641058 | 7.375523 | 6.745999 | 1.559472342 |
| 10866;1325 | 0.041188 | 0.21779  | 0.641107 | 5.057463 | 4.327732 | 1.55952487  |
| 60738801   | 0.015573 | 0.14886  | 0.641287 | 6.775951 | 6.137418 | 1.559719641 |
| 66514593   | 0.041085 | 0.21761  | 0.642232 | 7.135643 | 6.570678 | 1.560742222 |
| 19560;4789 | 0.033641 | 0.19991  | 0.64245  | 6.025036 | 5.280584 | 1.560977971 |
| 8297661    | 0.010272 | 0.13495  | 0.642829 | 10.88521 | 10.0838  | 1.561388135 |
| 17401;1032 | 0.019368 | 0.16166  | 0.643197 | 8.083664 | 7.391403 | 1.561785942 |
| 12612;5497 | 0.019237 | 0.16121  | 0.644381 | 8.783112 | 8.283159 | 1.563068658 |

|             |          |          |          |          |          |             |
|-------------|----------|----------|----------|----------|----------|-------------|
| 11399658    | 0.021835 | 0.16928  | 0.645238 | 11.15943 | 10.65222 | 1.563997789 |
| 45936058    | 0.000325 | 0.065605 | 0.645317 | 12.65596 | 11.9896  | 1.564083166 |
| ;9563;1358  | 0.001749 | 0.091058 | 0.646521 | 12.09389 | 11.3886  | 1.565388959 |
| 4368945     | 0.014932 | 0.14785  | 0.646562 | 4.055689 | 3.535016 | 1.565433737 |
| 4219;1805   | 0.005676 | 0.11645  | 0.646778 | 6.328864 | 5.742335 | 1.565667936 |
| 80056439    | 0.015534 | 0.14874  | 0.646909 | 12.91387 | 12.18091 | 1.565809709 |
| 84533888    | 0.015469 | 0.1486   | 0.64714  | 12.62553 | 12.05263 | 1.566060262 |
| ;3570;1256  | 0.042322 | 0.2206   | 0.647818 | 4.745612 | 3.891896 | 1.566796307 |
| .5055;1157  | 0.016389 | 0.15172  | 0.648326 | 11.39972 | 10.79553 | 1.567347986 |
| 1.72E+08    | 0.001369 | 0.087457 | 0.648992 | 12.43809 | 11.80048 | 1.568072115 |
| .5187;8001  | 0.016702 | 0.15314  | 0.649011 | 8.144653 | 7.60295  | 1.568093081 |
| 1.61E+08    | 0.032963 | 0.19858  | 0.649412 | 9.12862  | 8.61175  | 1.568528427 |
| ;4645;8434  | 0.009068 | 0.13115  | 0.650374 | 9.988858 | 9.348345 | 1.569574742 |
| 69994949    | 0.001682 | 0.091058 | 0.652045 | 12.61548 | 11.99555 | 1.571393985 |
| 1.22E+08    | 0.000111 | 0.043749 | 0.652163 | 11.97374 | 11.30524 | 1.571522783 |
| 71002533    | 0.000702 | 0.080556 | 0.652207 | 13.5196  | 12.87236 | 1.571570662 |
| 6520958     | 0.005592 | 0.11644  | 0.652329 | 6.274205 | 5.522554 | 1.571703084 |
| 1.31E+08    | 0.000163 | 0.053538 | 0.653373 | 9.163615 | 8.536747 | 1.572841509 |
| 85803115    | 0.039739 | 0.21457  | 0.653909 | 11.87711 | 11.29217 | 1.573425223 |
| 1.18E+08    | 0.026609 | 0.18143  | 0.653956 | 6.194749 | 5.560864 | 1.573476777 |
| 23770970    | 0.034681 | 0.2028   | 0.654868 | 6.751815 | 6.141624 | 1.574472231 |
| 1.41E+08    | 0.008224 | 0.1283   | 0.655358 | 10.38717 | 9.560571 | 1.575006404 |
| ;2613;1184  | 0.029447 | 0.18795  | 0.655752 | 10.08079 | 9.539482 | 1.575436596 |
| 35555928    | 0.004038 | 0.10781  | 0.656408 | 11.28113 | 10.66827 | 1.576153193 |
| 14901719    | 0.00537  | 0.11503  | 0.657241 | 10.20369 | 9.506409 | 1.577063862 |
| 1.04E+08    | 0.012275 | 0.14144  | 0.658067 | 7.932712 | 7.203937 | 1.577966761 |
| 46892463    | 0.010755 | 0.13708  | 0.659825 | 8.887172 | 8.303401 | 1.579891338 |
| 1.41E+08    | 0.000936 | 0.080556 | 0.660108 | 11.39782 | 10.71353 | 1.580200935 |
| ;0819;5502  | 0.010141 | 0.13468  | 0.660258 | 6.080065 | 5.317142 | 1.580365593 |
| 94180327    | 0.000382 | 0.066969 | 0.661019 | 9.214126 | 8.538835 | 1.58119946  |
| 35832787    | 0.000783 | 0.080556 | 0.663872 | 10.09965 | 9.412999 | 1.584328764 |
| 1.01E+08    | 0.024927 | 0.17766  | 0.667909 | 6.18731  | 5.606482 | 1.58876875  |
| 57811830    | 0.000167 | 0.053538 | 0.669628 | 9.677077 | 9.030588 | 1.590663279 |
| 55079504    | 0.023212 | 0.17264  | 0.670461 | 12.18489 | 11.63632 | 1.591581395 |
| 54753761    | 0.030508 | 0.19125  | 0.670592 | 6.095135 | 5.566896 | 1.591726186 |
| 42034641    | 0.001296 | 0.086714 | 0.67167  | 8.790275 | 8.096442 | 1.592916305 |
| ;77857261;  | 0.026645 | 0.18143  | 0.672282 | 5.914545 | 5.411031 | 1.593591504 |
| ;8761;7159; | 0.007459 | 0.1247   | 0.673002 | 7.355098 | 6.810359 | 1.594386971 |
| ;92202795;  | 0.011918 | 0.14071  | 0.67316  | 11.8122  | 11.23815 | 1.594562096 |
| 39599471    | 0.017601 | 0.15566  | 0.673723 | 9.994389 | 9.413513 | 1.595184198 |
| ;6922;7031; | 0.001729 | 0.091058 | 0.673923 | 11.74635 | 11.0032  | 1.595405048 |
| ;46025163;  | 0.027944 | 0.18402  | 0.674291 | 10.11088 | 9.551722 | 1.595812107 |
| 1.28E+08    | 0.03921  | 0.21366  | 0.675631 | 11.00481 | 10.46757 | 1.597294721 |
| 62862024    | 0.042832 | 0.22166  | 0.675785 | 4.937432 | 4.254443 | 1.597466131 |
| 148151925   | 0.018391 | 0.15788  | 0.677791 | 9.297749 | 8.625358 | 1.599688139 |
| 57487860    | 0.000496 | 0.070995 | 0.678164 | 8.248992 | 7.489983 | 1.600102524 |
| 124106806   | 0.043688 | 0.2235   | 0.678706 | 6.265803 | 5.57228  | 1.600703429 |



|             |          |          |          |          |          |             |
|-------------|----------|----------|----------|----------|----------|-------------|
| 1.22E+08    | 0.015045 | 0.14785  | 0.678837 | 5.606137 | 4.830574 | 1.600848229 |
| 31164326    | 0.013718 | 0.1458   | 0.679209 | 9.880919 | 8.929854 | 1.601261442 |
| .8535;7621; | 0.004178 | 0.10876  | 0.679243 | 5.072864 | 4.475063 | 1.601299132 |
| 1.35E+08    | 0.016571 | 0.15252  | 0.679898 | 9.292427 | 8.588895 | 1.602025984 |
| 1.15E+08    | 0.000664 | 0.079206 | 0.681853 | 12.2212  | 11.48779 | 1.604198755 |
| 42275197    | 0.012257 | 0.14144  | 0.682354 | 4.51639  | 3.845223 | 1.604756074 |
| 16508484    | 0.02881  | 0.18639  | 0.682524 | 11.95341 | 11.25385 | 1.604944895 |
| 8562681     | 0.014699 | 0.14782  | 0.685497 | 2.857042 | 2.081754 | 1.608256382 |
| 1.15E+08    | 0.020656 | 0.16591  | 0.686534 | 9.861201 | 9.225871 | 1.609412291 |
| 1.11E+08    | 0.01915  | 0.16093  | 0.686632 | 7.875348 | 7.197678 | 1.609521171 |
| 45318572    | 0.019991 | 0.16463  | 0.686651 | 11.01859 | 10.40583 | 1.609542851 |
| 6528760     | 0.020076 | 0.16503  | 0.687009 | 7.425091 | 6.716758 | 1.609941996 |
| '3779;3447' | 0.019268 | 0.16132  | 0.687444 | 6.338807 | 5.552331 | 1.610428343 |
| 75956831    | 0.01783  | 0.15631  | 0.687589 | 11.79401 | 11.23924 | 1.610589657 |
| 81266926    | 0.012167 | 0.14107  | 0.688812 | 10.25311 | 9.656224 | 1.611955646 |
| 33795989    | 5.07E-05 | 0.030782 | 0.689317 | 8.15351  | 7.454603 | 1.612519887 |
| 71373689    | 0.025391 | 0.17855  | 0.689417 | 6.499486 | 5.651859 | 1.612631792 |
| !1472;7854: | 0.001115 | 0.083992 | 0.689547 | 10.35002 | 9.662867 | 1.612776845 |
| 4624946     | 0.015777 | 0.14966  | 0.691111 | 8.802045 | 8.241857 | 1.614526026 |
| 1.64E+08    | 0.036326 | 0.2062   | 0.691824 | 5.412557 | 4.44456  | 1.615324399 |
| 29744414    | 0.013775 | 0.14588  | 0.691857 | 13.14242 | 12.54388 | 1.615361431 |
| ;71310965;  | 0.030265 | 0.19056  | 0.692955 | 9.22299  | 8.680228 | 1.616590789 |
| 1.45E+08    | 0.009392 | 0.1313   | 0.693949 | 7.333396 | 6.553514 | 1.6177053   |
| !1870;6981: | 0.002811 | 0.10053  | 0.697514 | 8.511522 | 7.876312 | 1.621707989 |
| !1717;1369: | 0.030369 | 0.19094  | 0.697734 | 8.777733 | 8.058633 | 1.621955166 |
| 55492647    | 0.000439 | 0.069972 | 0.697866 | 10.71064 | 10.00969 | 1.622103315 |
| 1.05E+08    | 0.018349 | 0.15788  | 0.697957 | 9.616971 | 8.979866 | 1.622206487 |
| 59012017    | 0.009699 | 0.13257  | 0.698344 | 11.9947  | 11.35926 | 1.622641695 |
| 79676126    | 0.004118 | 0.10842  | 0.699191 | 8.533335 | 7.882802 | 1.623594145 |
| )2191;8870: | 0.043411 | 0.22314  | 0.700238 | 8.664645 | 8.031317 | 1.624772899 |
| ;4145;1018' | 0.000426 | 0.068927 | 0.700614 | 11.31272 | 10.58846 | 1.625196613 |
| 13009183    | 0.001571 | 0.089465 | 0.700924 | 10.67587 | 9.955582 | 1.625545807 |
| 1.21E+08    | 0.016537 | 0.15245  | 0.703128 | 4.164867 | 3.410875 | 1.628030585 |
| 1.13E+08    | 0.015693 | 0.1493   | 0.703516 | 9.660234 | 8.897909 | 1.628469261 |
| ;85701149;  | 0.016127 | 0.15124  | 0.705959 | 5.798474 | 5.092286 | 1.631228504 |
| ;59177654;  | 0.008538 | 0.12945  | 0.70718  | 6.846209 | 6.162123 | 1.63260952  |
| 1.06E+08    | 0.017603 | 0.15566  | 0.709003 | 9.605107 | 9.04492  | 1.634674047 |
| '6785;7837' | 0.002263 | 0.096252 | 0.71217  | 10.92902 | 10.16811 | 1.6382669   |
| 47483233    | 0.001363 | 0.087395 | 0.712244 | 11.10576 | 10.29263 | 1.638351027 |
| 1.56E+08    | 0.01099  | 0.13768  | 0.713141 | 11.42139 | 10.72049 | 1.639369757 |
| )0391;1130: | 0.035024 | 0.20373  | 0.714711 | 4.314423 | 3.633172 | 1.641154946 |
| 25409494    | 0.00394  | 0.10733  | 0.715726 | 9.577091 | 8.911388 | 1.642309478 |
| 18631813    | 0.007468 | 0.1247   | 0.715728 | 10.02001 | 9.263265 | 1.642311398 |
| 62604806    | 0.035754 | 0.20536  | 0.715876 | 10.78494 | 10.11886 | 1.642480149 |
| 45459886    | 0.002696 | 0.099459 | 0.716264 | 14.8953  | 14.25969 | 1.642921607 |
| 1.02E+08    | 0.002295 | 0.096369 | 0.717065 | 10.47669 | 9.755197 | 1.643834333 |
| 1.49E+08    | 0.027076 | 0.1827   | 0.717544 | 10.83604 | 10.22256 | 1.644380741 |

|            |          |          |          |          |          |             |
|------------|----------|----------|----------|----------|----------|-------------|
| 1.72E+08   | 0.007964 | 0.12652  | 0.717621 | 9.329382 | 8.594203 | 1.644468287 |
| 73790828   | 0.026374 | 0.18058  | 0.717752 | 11.40017 | 10.70862 | 1.644617095 |
| 1.49E+08   | 0.0091   | 0.13115  | 0.718523 | 9.641189 | 8.979445 | 1.645496779 |
| 17520;2006 | 0.002357 | 0.096556 | 0.718896 | 5.258468 | 4.476439 | 1.645922089 |
| 10193;6504 | 0.000524 | 0.072713 | 0.718981 | 11.32274 | 10.63707 | 1.646018958 |
| 83317604   | 0.025335 | 0.17842  | 0.722884 | 10.27365 | 9.688728 | 1.65047759  |
| 14492;7894 | 0.002874 | 0.10081  | 0.723449 | 9.174016 | 8.42964  | 1.651124875 |
| 136889494  | 0.020268 | 0.16521  | 0.72408  | 11.02937 | 10.37217 | 1.651846615 |
| 1.05E+08   | 0.00231  | 0.096369 | 0.724793 | 12.77732 | 12.06889 | 1.65266369  |
| 10195;4884 | 0.013982 | 0.14642  | 0.726069 | 6.381265 | 5.67097  | 1.654126153 |
| 1.65E+08   | 0.005718 | 0.11645  | 0.726707 | 11.28868 | 10.63391 | 1.654857788 |
| 71592360   | 0.005112 | 0.11285  | 0.728203 | 9.513941 | 8.720201 | 1.656573948 |
| 17334;1716 | 0.033199 | 0.19903  | 0.729463 | 5.012614 | 4.323186 | 1.658021523 |
| 19950;6168 | 0.020661 | 0.16591  | 0.730787 | 7.649751 | 6.927817 | 1.659544584 |
| 15974;5175 | 0.044947 | 0.22676  | 0.731017 | 10.45457 | 9.840764 | 1.659809304 |
| 72380468   | 0.016217 | 0.15133  | 0.733095 | 8.250609 | 7.316609 | 1.662201134 |
| 161131139  | 0.026415 | 0.1808   | 0.735763 | 9.419641 | 8.709921 | 1.665278026 |
| 98953501   | 0.005936 | 0.11684  | 0.736311 | 15.46989 | 14.64455 | 1.665910399 |
| 18704;1061 | 0.004459 | 0.10974  | 0.737003 | 11.10353 | 10.35768 | 1.666709884 |
| 17873127;7 | 0.029989 | 0.18967  | 0.737634 | 9.269777 | 8.535098 | 1.667438939 |
| 20390671   | 0.011825 | 0.14032  | 0.737638 | 11.39806 | 10.58832 | 1.667443474 |
| 19302;7069 | 0.003748 | 0.10537  | 0.738544 | 12.08686 | 11.43387 | 1.66849154  |
| 1.16E+08   | 0.020437 | 0.16528  | 0.740395 | 9.561135 | 8.944765 | 1.670633739 |
| 13286;3521 | 0.005627 | 0.11645  | 0.740486 | 12.62883 | 11.99856 | 1.670738705 |
| 72137244   | 0.032191 | 0.19588  | 0.742196 | 4.229234 | 3.519639 | 1.672719522 |
| 11819403   | 0.033995 | 0.2004   | 0.74339  | 7.542057 | 6.838706 | 1.674104687 |
| 74750765   | 0.023734 | 0.17434  | 0.743822 | 12.55277 | 11.6773  | 1.674606025 |
| 1.05E+08   | 0.002575 | 0.098108 | 0.743999 | 11.8451  | 11.2066  | 1.674812187 |
| 55078131   | 0.001151 | 0.084257 | 0.745597 | 6.404218 | 5.656696 | 1.676668425 |
| 1.2E+08    | 0.014518 | 0.14768  | 0.747442 | 8.392371 | 7.659591 | 1.678813569 |
| 1.05E+08   | 0.018123 | 0.15751  | 0.748072 | 10.02295 | 9.214898 | 1.679547008 |
| 4205603    | 0.03392  | 0.20036  | 0.748548 | 5.11716  | 4.450206 | 1.680101227 |
| 1.17E+08   | 0.011376 | 0.13865  | 0.748565 | 7.80203  | 7.205053 | 1.680120473 |
| 27275656   | 0.003785 | 0.10572  | 0.749748 | 11.52701 | 10.75754 | 1.681499538 |
| 46773407   | 0.011498 | 0.13915  | 0.750513 | 9.124834 | 8.340693 | 1.682390486 |
| 100159808  | 0.008602 | 0.13008  | 0.753121 | 7.318924 | 6.701511 | 1.685435593 |
| 1.12E+08   | 0.003475 | 0.10464  | 0.753219 | 5.221811 | 4.273893 | 1.685549931 |
| 1.14E+08   | 0.004538 | 0.10974  | 0.754179 | 12.52332 | 11.60857 | 1.686671837 |
| 5057071    | 0.015634 | 0.14918  | 0.755407 | 5.927013 | 5.002735 | 1.688108041 |
| 1.08E+08   | 0.01057  | 0.13629  | 0.756099 | 12.02244 | 11.32477 | 1.688917424 |
| 17150;8532 | 0.010567 | 0.13629  | 0.75816  | 8.243384 | 7.566709 | 1.691331861 |
| 1.71E+08   | 0.001978 | 0.092238 | 0.759314 | 7.802806 | 7.103654 | 1.692685776 |
| 18728;1285 | 0.022046 | 0.16962  | 0.759973 | 11.37089 | 10.75458 | 1.693458517 |
| 120618866  | 0.004912 | 0.11201  | 0.76121  | 9.27927  | 8.405741 | 1.694911294 |
| 12138;5583 | 0.015758 | 0.14954  | 0.761489 | 7.233285 | 6.608473 | 1.695239056 |
| 18839;4523 | 0.02771  | 0.18391  | 0.763142 | 6.275381 | 5.621051 | 1.697183309 |
| 1.81E+08   | 0.002826 | 0.10065  | 0.763563 | 11.1203  | 10.42614 | 1.697678222 |

|            |          |          |          |          |          |             |
|------------|----------|----------|----------|----------|----------|-------------|
| 48480611   | 0.008826 | 0.13079  | 0.764331 | 10.59412 | 9.893965 | 1.698581819 |
| 94395358   | 0.016169 | 0.15124  | 0.765248 | 10.66503 | 9.856528 | 1.699661722 |
| 98728198   | 0.009318 | 0.1313   | 0.766531 | 8.257933 | 7.549728 | 1.701174162 |
| 61273438   | 0.000353 | 0.065605 | 0.767287 | 9.10693  | 8.270367 | 1.70206648  |
| 98588375   | 0.0034   | 0.10463  | 0.768763 | 13.19451 | 12.52384 | 1.703808491 |
| 95052222   | 0.025612 | 0.17945  | 0.769043 | 11.16937 | 10.47072 | 1.70413903  |
| 98563592   | 0.017169 | 0.15402  | 0.769148 | 5.160814 | 4.182844 | 1.704262568 |
| 1.23E+08   | 0.008993 | 0.13115  | 0.769765 | 11.79607 | 11.05565 | 1.704992215 |
| .3464;1317 | 0.024333 | 0.17599  | 0.770486 | 8.924018 | 8.23741  | 1.705844713 |
| 64128158   | 0.006376 | 0.11848  | 0.774235 | 9.947336 | 9.229584 | 1.710282727 |
| 1.05E+08   | 0.005854 | 0.11645  | 0.774824 | 8.205514 | 7.46545  | 1.710981624 |
| 2794;3262  | 0.01233  | 0.14156  | 0.776449 | 11.87113 | 11.09601 | 1.712909008 |
| 45021644   | 0.002975 | 0.10081  | 0.778617 | 10.01908 | 9.291971 | 1.715486043 |
| 37657312   | 0.000769 | 0.080556 | 0.779015 | 12.95592 | 12.10618 | 1.715958618 |
| 9409;1072  | 0.008168 | 0.12803  | 0.779372 | 8.174828 | 7.416389 | 1.716383855 |
| 8729;5728  | 0.028653 | 0.18598  | 0.780149 | 9.060677 | 8.374811 | 1.717308574 |
| 1.08E+08   | 0.025424 | 0.17873  | 0.781002 | 9.321785 | 8.485295 | 1.71832382  |
| 1.08E+08   | 0.008432 | 0.12898  | 0.782089 | 6.985748 | 6.29856  | 1.719619584 |
| 1.37E+08   | 0.005803 | 0.11645  | 0.782386 | 8.50523  | 7.7116   | 1.7199732   |
| 1.01E+08   | 0.011629 | 0.13955  | 0.782717 | 12.39102 | 11.69077 | 1.720367978 |
| 1.34E+08   | 0.001507 | 0.088641 | 0.783366 | 8.699794 | 7.94684  | 1.721141892 |
| 47008414   | 0.014532 | 0.14768  | 0.784118 | 10.78254 | 10.11709 | 1.722039031 |
| 69685554   | 0.013414 | 0.14492  | 0.784802 | 6.235666 | 5.579497 | 1.722856086 |
| 2973;3902  | 0.036274 | 0.20617  | 0.784806 | 6.389677 | 5.480955 | 1.722860124 |
| 16798274   | 0.026687 | 0.18165  | 0.784973 | 10.26349 | 9.630197 | 1.723059961 |
| 0698;3134  | 0.035798 | 0.2055   | 0.787222 | 7.219121 | 6.413944 | 1.725748195 |
| 2152;4509  | 0.000216 | 0.054854 | 0.788615 | 13.08949 | 12.36077 | 1.727415873 |
| 2280;3409  | 0.020451 | 0.1653   | 0.788875 | 6.736486 | 5.802299 | 1.727727047 |
| 0328;3423  | 0.014542 | 0.14768  | 0.793375 | 9.046061 | 8.350517 | 1.733123794 |
| 3747;5783  | 0.023463 | 0.17358  | 0.794354 | 9.388823 | 8.644295 | 1.734300612 |
| .6602;9944 | 0.003165 | 0.10245  | 0.795259 | 11.9919  | 11.22504 | 1.735389476 |
| 1.23E+08   | 0.008929 | 0.13085  | 0.795728 | 7.549934 | 6.839606 | 1.735953075 |
| 1.24E+08   | 0.026198 | 0.18024  | 0.797441 | 3.696106 | 2.710684 | 1.738015608 |
| 9334;1100  | 0.009886 | 0.13332  | 0.798435 | 5.390768 | 4.698747 | 1.739213512 |
| 77259223   | 0.000933 | 0.080556 | 0.798454 | 5.284483 | 4.475059 | 1.739235898 |
| 1.38E+08   | 0.001436 | 0.087583 | 0.798902 | 8.805992 | 8.092721 | 1.739776789 |
| 3615;4710  | 0.016808 | 0.15336  | 0.802754 | 10.03278 | 9.359682 | 1.744427773 |
| 0001;4804  | 0.034746 | 0.20297  | 0.803272 | 4.990272 | 3.963654 | 1.745054351 |
| 3968354    | 0.044243 | 0.22474  | 0.80334  | 5.591627 | 4.893306 | 1.745136091 |
| 8660773    | 0.009542 | 0.13187  | 0.803946 | 10.03435 | 9.335814 | 1.745870353 |
| 94398239   | 0.028568 | 0.18586  | 0.805249 | 8.837083 | 8.13293  | 1.747447342 |
| 1.08E+08   | 0.013207 | 0.14423  | 0.805289 | 9.558192 | 8.664386 | 1.747495527 |
| 3769;1024  | 0.000774 | 0.080556 | 0.805446 | 12.57298 | 11.68731 | 1.747686368 |
| 95556405   | 0.006266 | 0.1184   | 0.806582 | 9.103915 | 8.274632 | 1.749062544 |
| 67375763   | 0.015949 | 0.15026  | 0.806883 | 7.36313  | 6.513342 | 1.749427579 |
| 38341860   | 0.01481  | 0.14785  | 0.807338 | 4.458427 | 3.755991 | 1.749979639 |
| 1.44E+08   | 0.039815 | 0.21464  | 0.808047 | 2.14367  | 0.776642 | 1.750840242 |

|           |          |          |          |          |          |             |
|-----------|----------|----------|----------|----------|----------|-------------|
| 1.5E+08   | 0.015036 | 0.14785  | 0.808586 | 9.33192  | 8.327042 | 1.751494022 |
| 90524581  | 0.014089 | 0.14652  | 0.812611 | 8.060906 | 7.190046 | 1.756386703 |
| 38645922  | 0.019166 | 0.16094  | 0.816431 | 3.025355 | 2.192617 | 1.761044604 |
| 1.24E+08  | 0.000993 | 0.081742 | 0.816807 | 8.216703 | 7.45606  | 1.761503198 |
| 2153;6787 | 0.041212 | 0.21782  | 0.818531 | 7.710238 | 6.830737 | 1.763609083 |
| 1.21E+08  | 0.02999  | 0.18967  | 0.819092 | 7.580347 | 6.954995 | 1.764295068 |
| 34078008  | 0.007605 | 0.12553  | 0.82096  | 11.67279 | 10.93723 | 1.766581064 |
| 5211;9792 | 0.002713 | 0.099896 | 0.822431 | 11.66951 | 10.91471 | 1.768383576 |
| 80232616  | 0.001327 | 0.086773 | 0.822471 | 9.762635 | 8.808878 | 1.76843249  |
| 7115;7654 | 0.033635 | 0.19991  | 0.823902 | 5.128286 | 4.048848 | 1.770187595 |
| 88743202  | 0.005173 | 0.11319  | 0.825027 | 12.08969 | 11.1909  | 1.771568602 |
| 1.23E+08  | 0.024014 | 0.17522  | 0.826485 | 7.190941 | 6.54482  | 1.773359677 |
| 5115;9583 | 0.032189 | 0.19588  | 0.826808 | 6.079198 | 5.077134 | 1.773756693 |
| 1.2E+08   | 0.004737 | 0.11048  | 0.826864 | 7.775078 | 6.978473 | 1.773825231 |
| 83574203  | 0.00426  | 0.10956  | 0.827613 | 9.960386 | 9.098033 | 1.774746467 |
| 6125;4849 | 0.035786 | 0.20549  | 0.828033 | 2.031456 | 0.765347 | 1.775263541 |
| 2412;2497 | 0.00111  | 0.083992 | 0.828413 | 10.95658 | 10.06669 | 1.775730685 |
| 1.34E+08  | 0.024177 | 0.17574  | 0.829804 | 6.883341 | 6.1406   | 1.777443831 |
| 52981039  | 0.004249 | 0.10951  | 0.831653 | 10.00257 | 9.23951  | 1.779723394 |
| 1384;7287 | 0.0098   | 0.13301  | 0.831723 | 14.27484 | 13.56242 | 1.779809901 |
| 62497298  | 0.009015 | 0.13115  | 0.835427 | 8.81251  | 7.776738 | 1.784385465 |
| 1.48E+08  | 0.02662  | 0.18143  | 0.83554  | 5.557852 | 4.812374 | 1.784525409 |
| 28446895  | 0.037892 | 0.21071  | 0.835719 | 6.754699 | 6.011871 | 1.784745783 |
| 7886;1104 | 0.018113 | 0.15751  | 0.836257 | 11.01475 | 10.18766 | 1.785412074 |
| 827;5343  | 0.006405 | 0.11853  | 0.83677  | 11.13284 | 10.13532 | 1.786046481 |
| 0943;7185 | 0.003649 | 0.10469  | 0.837273 | 12.95592 | 12.1165  | 1.78667007  |
| 70514616  | 0.039814 | 0.21464  | 0.838369 | 3.548399 | 2.485882 | 1.788027184 |
| 4487;9331 | 0.026343 | 0.18056  | 0.841355 | 11.0042  | 10.32316 | 1.79173278  |
| 9055;4076 | 0.027044 | 0.18269  | 0.84302  | 7.466071 | 6.789688 | 1.793801676 |
| 78359785  | 0.008524 | 0.12945  | 0.845075 | 11.62652 | 10.79978 | 1.796357717 |
| 1.46E+08  | 0.016025 | 0.15066  | 0.846303 | 5.605452 | 4.585044 | 1.797887906 |
| 17551502  | 0.004822 | 0.11123  | 0.84729  | 14.26391 | 13.29875 | 1.799118089 |
| 1.01E+08  | 0.008436 | 0.12898  | 0.849079 | 10.90679 | 10.14717 | 1.801351008 |
| 10453181  | 0.001565 | 0.089465 | 0.851141 | 11.37847 | 10.42033 | 1.803927203 |
| 0984;9945 | 0.015699 | 0.1493   | 0.852729 | 8.34774  | 7.552567 | 1.805913163 |
| 22041352  | 0.015206 | 0.148    | 0.853582 | 4.575416 | 3.730642 | 1.806981445 |
| 34130354  | 0.002389 | 0.096556 | 0.853827 | 12.25357 | 11.40227 | 1.807288499 |
| 2331;3104 | 0.004413 | 0.10974  | 0.854915 | 8.537767 | 7.799595 | 1.808651627 |
| 1.41E+08  | 0.004675 | 0.11016  | 0.856719 | 5.142928 | 4.096836 | 1.810914867 |
| 8396;8115 | 0.027568 | 0.18363  | 0.859344 | 6.862637 | 5.973787 | 1.814213407 |
| 96825894  | 0.012246 | 0.14144  | 0.860445 | 10.3189  | 9.450376 | 1.815597671 |
| 5431;8040 | 0.004937 | 0.11201  | 0.866167 | 11.93913 | 11.06833 | 1.822813609 |
| 27563672  | 0.022365 | 0.17052  | 0.866295 | 10.07725 | 9.370367 | 1.8229757   |
| 41832583  | 0.025328 | 0.17842  | 0.86649  | 6.161832 | 5.467752 | 1.823222112 |
| 51175187  | 0.002276 | 0.096252 | 0.867596 | 8.067481 | 7.173849 | 1.824619421 |
| 32678594  | 0.024009 | 0.17522  | 0.867743 | 12.15631 | 11.35524 | 1.824805996 |
| 1.24E+08  | 0.002245 | 0.096252 | 0.868117 | 6.155709 | 5.14118  | 1.825278459 |

|               |          |          |          |          |          |             |
|---------------|----------|----------|----------|----------|----------|-------------|
| '2446;5757:   | 0.007388 | 0.1247   | 0.870983 | 10.65639 | 9.811295 | 1.828908685 |
| 60897447      | 0.004633 | 0.11001  | 0.871009 | 6.248717 | 5.343002 | 1.828941593 |
| 51590670      | 0.015193 | 0.148    | 0.871485 | 9.671132 | 8.682732 | 1.829545206 |
| 1.38E+08      | 0.005358 | 0.11503  | 0.871999 | 8.240145 | 7.489789 | 1.830197452 |
| 1.17E+08      | 0.034795 | 0.20314  | 0.87428  | 8.484939 | 7.759413 | 1.833092886 |
| '4750;2756:   | 0.008355 | 0.1286   | 0.875    | 7.715152 | 6.720477 | 1.83400774  |
| 1.23E+08      | 0.024304 | 0.17599  | 0.876201 | 5.267448 | 4.347034 | 1.835535382 |
| 1.58E+08      | 0.006327 | 0.11846  | 0.876495 | 12.6664  | 11.7668  | 1.835909167 |
| '4943;5525:   | 0.00356  | 0.10464  | 0.87686  | 11.80075 | 11.03766 | 1.836373956 |
| '3519;7199:   | 0.011525 | 0.13915  | 0.879663 | 10.88452 | 10.05041 | 1.839944949 |
| 26657258      | 0.004917 | 0.11201  | 0.882271 | 13.65173 | 12.79219 | 1.843274449 |
| 66842796      | 0.002589 | 0.098152 | 0.882931 | 6.369171 | 5.586149 | 1.844117426 |
| 1.02E+08      | 0.025879 | 0.17955  | 0.885342 | 10.1999  | 9.531246 | 1.847202094 |
| 1.67E+08      | 0.005945 | 0.1169   | 0.889252 | 14.3075  | 13.27757 | 1.85221598  |
| '3122;9836:   | 0.032845 | 0.19819  | 0.889786 | 9.797556 | 9.123302 | 1.852901705 |
| '3036;3298:   | 0.004018 | 0.10764  | 0.890269 | 8.170665 | 7.10949  | 1.853521173 |
| '3;7923557;7: | 0.037732 | 0.21022  | 0.890881 | 11.50757 | 10.76268 | 1.854308086 |
| '07104;1220:  | 0.015129 | 0.14798  | 0.891524 | 8.298772 | 7.424737 | 1.855134613 |
| .1936;6131:   | 0.020749 | 0.16614  | 0.89308  | 4.677676 | 3.544122 | 1.85713704  |
| .4627;4473:   | 0.043443 | 0.22314  | 0.894606 | 5.038382 | 4.323425 | 1.859101623 |
| ;83033397;    | 0.017492 | 0.15552  | 0.896579 | 6.462942 | 5.670959 | 1.861646482 |
| 82903974      | 0.026496 | 0.18107  | 0.897371 | 5.876303 | 5.056572 | 1.862668152 |
| ;59182021;    | 0.028891 | 0.18667  | 0.899957 | 6.652622 | 5.692601 | 1.866010041 |
| 55072702      | 0.001751 | 0.091058 | 0.903243 | 10.42799 | 9.539444 | 1.870264789 |
| '09498;7601:  | 0.004718 | 0.11036  | 0.903433 | 7.43563  | 6.59933  | 1.870511763 |
| '1845;1056:   | 0.001267 | 0.0862   | 0.905959 | 9.777365 | 8.969257 | 1.873789831 |
| 82445367      | 0.019248 | 0.16121  | 0.906196 | 9.068428 | 8.352774 | 1.874097306 |
| ;97941302;    | 0.007749 | 0.12553  | 0.906419 | 7.430726 | 6.628683 | 1.87438692  |
| 1.02E+08      | 0.004606 | 0.10974  | 0.910863 | 10.2481  | 9.448955 | 1.880170026 |
| 94645216      | 0.004664 | 0.11016  | 0.911084 | 12.79497 | 11.99052 | 1.880458229 |
| 11604804      | 0.005323 | 0.11503  | 0.911322 | 6.953788 | 6.14652  | 1.880768042 |
| 10393216      | 0.021239 | 0.16752  | 0.912088 | 7.43999  | 6.465722 | 1.881766878 |
| '0761;1774:   | 0.010658 | 0.13679  | 0.914493 | 10.53839 | 9.711814 | 1.884906388 |
| 32244662      | 0.008453 | 0.12905  | 0.915325 | 10.88996 | 9.966767 | 1.885994443 |
| 1.17E+08      | 0.014996 | 0.14785  | 0.920773 | 8.111361 | 7.384141 | 1.893129004 |
| 44471658      | 0.01058  | 0.13633  | 0.920998 | 8.828542 | 8.085114 | 1.893424925 |
| '09735;1358:  | 0.044686 | 0.22622  | 0.92191  | 8.767299 | 7.52591  | 1.894621289 |
| '0977;3082:   | 0.037903 | 0.21071  | 0.923911 | 3.452985 | 2.452489 | 1.897251143 |
| 1.41E+08      | 0.014947 | 0.14785  | 0.927137 | 11.99582 | 11.12701 | 1.901499413 |
| '0171;3277:   | 0.01321  | 0.14423  | 0.927385 | 6.195258 | 5.431503 | 1.901825264 |
| .4179;1739:   | 0.002427 | 0.096556 | 0.927707 | 4.574135 | 3.522448 | 1.902249918 |
| 1.21E+08      | 0.004965 | 0.11216  | 0.931071 | 7.863305 | 6.906465 | 1.906691304 |
| 1.06E+08      | 0.033283 | 0.19924  | 0.933093 | 7.026725 | 6.116721 | 1.909365497 |
| 1.23E+08      | 0.035413 | 0.20459  | 0.933928 | 8.453654 | 7.456211 | 1.910470459 |
| '2710;3517:   | 0.00936  | 0.1313   | 0.933939 | 6.019896 | 5.106391 | 1.910484471 |
| ;98095632;    | 0.001896 | 0.091058 | 0.933979 | 13.49626 | 12.60584 | 1.910538022 |
| 1.22E+08      | 0.003265 | 0.10323  | 0.934466 | 8.917991 | 7.938195 | 1.911183594 |

|            |          |          |          |          |          |             |
|------------|----------|----------|----------|----------|----------|-------------|
| 1937;8344  | 0.002052 | 0.092697 | 0.938803 | 3.18014  | 2.081754 | 1.916936448 |
| 7908;1950  | 0.033748 | 0.20023  | 0.938803 | 3.407062 | 2.19315  | 1.916936448 |
| 5092879    | 0.01047  | 0.13624  | 0.939555 | 10.34472 | 9.428508 | 1.917936787 |
| 80603896   | 0.023651 | 0.17428  | 0.941268 | 9.958736 | 9.140206 | 1.920215475 |
| 4565;2704  | 0.000494 | 0.070995 | 0.944446 | 11.12092 | 10.09012 | 1.924450272 |
| 83530518   | 0.038953 | 0.21311  | 0.945227 | 3.579061 | 2.091964 | 1.925491953 |
| 8469;1284  | 0.031954 | 0.19503  | 0.947596 | 11.86088 | 11.10446 | 1.928656058 |
| 79614018   | 0.034298 | 0.20156  | 0.949099 | 7.24584  | 6.33664  | 1.930666314 |
| 79782630   | 0.000519 | 0.072364 | 0.950032 | 11.16577 | 10.122   | 1.931914938 |
| 59525501   | 0.034046 | 0.20056  | 0.950205 | 4.882334 | 3.709397 | 1.932146955 |
| 6658;4481  | 0.006074 | 0.11773  | 0.951481 | 10.4606  | 9.596003 | 1.933856908 |
| 55296628   | 0.008285 | 0.12847  | 0.951633 | 10.21803 | 9.297578 | 1.934060238 |
| 31337394   | 0.027753 | 0.18396  | 0.954617 | 3.946457 | 2.822178 | 1.938065155 |
| 1.07E+08   | 0.020434 | 0.16528  | 0.954768 | 5.199624 | 4.403086 | 1.938267254 |
| 1691;1515  | 0.00108  | 0.083992 | 0.954936 | 13.93424 | 13.04742 | 1.93849323  |
| 1.84E+08   | 0.002537 | 0.097444 | 0.961278 | 4.728574 | 3.766423 | 1.947034224 |
| 160072782  | 0.026721 | 0.18172  | 0.961846 | 8.225836 | 7.456088 | 1.947801203 |
| 1.64E+08   | 0.000683 | 0.079814 | 0.963314 | 13.53393 | 12.66513 | 1.949783323 |
| 1.35E+08   | 0.02109  | 0.16698  | 0.963334 | 5.454875 | 4.340342 | 1.949810522 |
| 1.02E+08   | 0.010484 | 0.13624  | 0.964754 | 5.71073  | 4.931436 | 1.951730728 |
| 130139162  | 0.025335 | 0.17842  | 0.967785 | 6.37775  | 5.434528 | 1.955834872 |
| 7625;8034  | 0.001953 | 0.091857 | 0.968846 | 8.558528 | 7.550801 | 1.957274379 |
| 9255;2837  | 0.029851 | 0.18947  | 0.969574 | 8.581542 | 7.688971 | 1.958262909 |
| 96171718   | 0.001701 | 0.091058 | 0.9723   | 9.133431 | 8.254969 | 1.961965976 |
| 7236;1148  | 0.040906 | 0.21733  | 0.972914 | 6.709324 | 5.981574 | 1.962801416 |
| 1.14E+08   | 0.006658 | 0.11984  | 0.974103 | 11.79378 | 10.7657  | 1.964419991 |
| 7881;1251  | 0.033471 | 0.19964  | 0.976071 | 6.209468 | 5.212895 | 1.967101307 |
| 78378588   | 0.002179 | 0.095564 | 0.97722  | 7.956686 | 6.826362 | 1.968667856 |
| 69795937   | 0.038059 | 0.21083  | 0.978298 | 8.294322 | 7.46883  | 1.970140462 |
| 7380;1725  | 0.003617 | 0.10464  | 0.979467 | 12.74902 | 11.9131  | 1.971737247 |
| 1728;7588  | 0.000421 | 0.068927 | 0.981934 | 9.48756  | 8.486014 | 1.975111899 |
| 69666062   | 0.020007 | 0.16463  | 0.988579 | 7.441126 | 6.532974 | 1.984230115 |
| 41569527   | 0.008903 | 0.13085  | 0.991846 | 8.048782 | 7.1476   | 1.98872858  |
| 10122;5819 | 0.012343 | 0.14156  | 0.999023 | 8.021953 | 6.915435 | 1.998646224 |
| 36475887   | 0.002752 | 0.10008  | 1.007614 | 13.66066 | 12.73948 | 2.010583556 |
| 8134;1094  | 0.014302 | 0.14697  | 1.01003  | 5.410295 | 4.54475  | 2.013953556 |
| 1.45E+08   | 0.000356 | 0.065605 | 1.012122 | 12.57327 | 11.59072 | 2.016875526 |
| 2942;1015  | 0.002639 | 0.098285 | 1.01297  | 10.70803 | 9.788349 | 2.018061792 |
| 1.02E+08   | 0.00185  | 0.091058 | 1.015088 | 8.339561 | 7.261578 | 2.021026441 |
| 1.08E+08   | 0.003286 | 0.10359  | 1.016638 | 8.921828 | 7.93587  | 2.023199251 |
| 15045478   | 0.001277 | 0.086391 | 1.017188 | 10.63308 | 9.661318 | 2.023970514 |
| 80257545   | 0.005601 | 0.11645  | 1.018541 | 12.88173 | 11.80367 | 2.025869039 |
| 67367794   | 0.015402 | 0.1486   | 1.020196 | 8.966807 | 7.583646 | 2.02819437  |
| 1978;1296  | 0.03795  | 0.21071  | 1.020482 | 7.476452 | 6.529708 | 2.028596878 |
| 20874737   | 0.003088 | 0.10151  | 1.02129  | 10.19536 | 9.176326 | 2.029733527 |
| 5327;5065  | 0.005073 | 0.11266  | 1.026909 | 10.1398  | 9.111726 | 2.037654436 |
| 10526;9089 | 0.001777 | 0.091058 | 1.028275 | 8.295553 | 7.163027 | 2.039584195 |

|             |          |          |          |          |          |             |
|-------------|----------|----------|----------|----------|----------|-------------|
| 3915501     | 0.006685 | 0.11994  | 1.028669 | 2.965499 | 2.018659 | 2.040141487 |
| 1.11E+08    | 0.013267 | 0.14438  | 1.029242 | 7.385352 | 6.521664 | 2.040951051 |
| 19921143    | 0.01975  | 0.16369  | 1.030365 | 9.764742 | 8.868652 | 2.042540841 |
| '7385;8289' | 0.015786 | 0.14968  | 1.034599 | 12.5049  | 11.54042 | 2.048543754 |
| 87000069    | 0.008977 | 0.13113  | 1.046248 | 11.16    | 10.30001 | 2.065151907 |
| ;35115416;  | 0.012034 | 0.14084  | 1.05059  | 4.313593 | 3.194006 | 2.071377012 |
| ;53612096;  | 0.006875 | 0.1213   | 1.050819 | 8.136518 | 7.201439 | 2.071706286 |
| ;34873108;  | 0.029037 | 0.18719  | 1.051377 | 5.564554 | 4.683373 | 2.072507275 |
| 70631635    | 0.000552 | 0.073734 | 1.051571 | 8.43453  | 7.287107 | 2.072786033 |
| ;55543261;  | 0.014578 | 0.14768  | 1.05997  | 10.9951  | 9.977864 | 2.084888463 |
| 130935157   | 0.028605 | 0.18587  | 1.060264 | 9.029647 | 8.132837 | 2.08531339  |
| ;15441977;  | 0.016171 | 0.15124  | 1.062879 | 5.405238 | 4.51516  | 2.089097004 |
| 1.63E+08    | 0.009699 | 0.13257  | 1.06502  | 7.178453 | 5.843253 | 2.09219902  |
| 70520736    | 0.035223 | 0.20409  | 1.065786 | 3.422756 | 2.506095 | 2.093310081 |
| 91374217    | 4.08E-05 | 0.026776 | 1.066544 | 5.979984 | 4.947261 | 2.09440985  |
| .8825;8302. | 0.015433 | 0.1486   | 1.067922 | 8.965515 | 8.047556 | 2.096411603 |
| ;57413761;  | 0.034497 | 0.20219  | 1.069365 | 8.059994 | 7.114937 | 2.098508847 |
| '5352;6925' | 0.000591 | 0.075463 | 1.070578 | 3.606717 | 2.654423 | 2.100274428 |
| 70466199    | 0.014166 | 0.14652  | 1.072216 | 7.458413 | 6.226128 | 2.102661212 |
| 1E+08       | 6.13E-05 | 0.034221 | 1.077723 | 8.097997 | 7.008323 | 2.110702145 |
| 1.37E+08    | 0.008543 | 0.12945  | 1.078389 | 12.2852  | 11.22521 | 2.111677412 |
| ;24445682;  | 0.024283 | 0.17599  | 1.078652 | 6.423437 | 5.50135  | 2.112061321 |
| 73572242    | 0.00247  | 0.09673  | 1.080408 | 8.292206 | 7.348226 | 2.114633874 |
| 20332713    | 0.014178 | 0.14657  | 1.080692 | 10.05956 | 8.997031 | 2.115050553 |
| 50210790    | 0.003377 | 0.1044   | 1.081899 | 13.969   | 12.982   | 2.116820105 |
| '3999;4976' | 0.00684  | 0.12106  | 1.082061 | 8.338344 | 7.235416 | 2.117058835 |
| '6875;5662' | 0.006375 | 0.11848  | 1.082162 | 12.24589 | 11.34212 | 2.117207179 |
| 26089264    | 0.019671 | 0.16328  | 1.08239  | 3.4267   | 2.377355 | 2.117541229 |
| 1.26E+08    | 0.001131 | 0.083992 | 1.084179 | 8.04525  | 6.839949 | 2.120168167 |
| 1.56E+08    | 0.015451 | 0.1486   | 1.089228 | 4.637504 | 3.668427 | 2.127601645 |
| 29180673    | 0.003624 | 0.10464  | 1.090437 | 12.78129 | 11.65876 | 2.129384538 |
| 1.53E+08    | 1.91E-05 | 0.017092 | 1.09176  | 9.478467 | 8.383345 | 2.131339423 |
| 78262580    | 0.001766 | 0.091058 | 1.09878  | 6.365519 | 5.407594 | 2.141735719 |
| 21163611    | 0.040337 | 0.21591  | 1.103453 | 2.182924 | 0.83176  | 2.148684035 |
| 90679388    | 0.007082 | 0.12329  | 1.104352 | 7.992308 | 6.931462 | 2.15002289  |
| 1.27E+08    | 0.006055 | 0.11771  | 1.104417 | 9.114285 | 7.998189 | 2.150119139 |
| 1.55E+08    | 0.012001 | 0.14076  | 1.107258 | 5.369001 | 4.463848 | 2.154358494 |
| 64268145    | 0.030266 | 0.19056  | 1.110617 | 5.07813  | 3.990781 | 2.159380476 |
| 79858665    | 9.48E-05 | 0.041471 | 1.113766 | 14.03683 | 12.99749 | 2.164098711 |
| 99358530    | 0.005726 | 0.11645  | 1.114221 | 9.958242 | 8.855314 | 2.164780712 |
| '6726;3526' | 0.001809 | 0.091058 | 1.11459  | 10.11624 | 9.071203 | 2.165334697 |
| 11882899    | 0.018267 | 0.15763  | 1.11562  | 3.363057 | 2.221971 | 2.166880589 |
| 58469745    | 0.0007   | 0.080556 | 1.1161   | 12.86313 | 11.80458 | 2.167602601 |
| 21472661    | 0.021936 | 0.16957  | 1.119414 | 6.210145 | 5.260943 | 2.172586412 |
| ;44387623;  | 0.040706 | 0.21675  | 1.119876 | 5.102805 | 4.058111 | 2.173282293 |
| 95712754    | 0.004021 | 0.10764  | 1.121659 | 2.855646 | 1.578073 | 2.175970838 |
| '8726;1092' | 0.042638 | 0.22152  | 1.124194 | 2.183558 | 1.367334 | 2.179796725 |

|            |          |          |          |          |          |             |
|------------|----------|----------|----------|----------|----------|-------------|
| ;70893436; | 0.005871 | 0.11645  | 1.127771 | 10.72209 | 9.773281 | 2.185208365 |
| 1.18E+08   | 0.000206 | 0.054854 | 1.133294 | 10.12574 | 9.030308 | 2.193590774 |
| ;1460;1967 | 0.027446 | 0.18335  | 1.133715 | 3.582055 | 2.543001 | 2.194230968 |
| '8048;9758 | 0.011496 | 0.13915  | 1.134129 | 7.661128 | 6.478633 | 2.194860728 |
| '9151;3434 | 0.014706 | 0.14782  | 1.136021 | 7.520477 | 6.2541   | 2.197740601 |
| 1.21E+08   | 0.03572  | 0.20536  | 1.136726 | 4.397157 | 3.435004 | 2.198814969 |
| 87680235   | 0.023619 | 0.1741   | 1.137337 | 2.179177 | 0.765347 | 2.199745547 |
| 16898441   | 0.008771 | 0.13079  | 1.137538 | 4.669043 | 3.534879 | 2.200052607 |
| 1.21E+08   | 0.00373  | 0.10515  | 1.138091 | 2.292025 | 1.155984 | 2.200896258 |
| ;0244;3704 | 0.023942 | 0.17505  | 1.139759 | 8.573433 | 7.383429 | 2.203442141 |
| 56062310   | 0.027465 | 0.18343  | 1.142563 | 6.915211 | 5.650056 | 2.207729128 |
| ;2848;2277 | 0.002964 | 0.10081  | 1.142974 | 11.02263 | 9.84237  | 2.208358226 |
| ;6177;6261 | 0.00454  | 0.10974  | 1.14981  | 8.923261 | 7.743369 | 2.21884676  |
| 1.68E+08   | 0.000194 | 0.054707 | 1.157661 | 7.595095 | 6.474666 | 2.230954728 |
| 61814113   | 0.015908 | 0.15012  | 1.158077 | 2.446657 | 0.76998  | 2.231597601 |
| ;9444;4059 | 0.008802 | 0.13079  | 1.159223 | 4.534204 | 3.306891 | 2.233371792 |
| 98053462   | 0.036395 | 0.2064   | 1.162038 | 9.058509 | 7.954161 | 2.237733233 |
| 55944661   | 0.015441 | 0.1486   | 1.162748 | 8.357502 | 6.920227 | 2.238834536 |
| 25368092   | 0.008282 | 0.12847  | 1.163937 | 8.427063 | 7.168325 | 2.240679906 |
| 16132550   | 0.003685 | 0.10503  | 1.166506 | 9.965269 | 8.88344  | 2.244673415 |
| '1817;1164 | 0.001241 | 0.086071 | 1.16867  | 7.956473 | 6.800949 | 2.248042966 |
| 1.32E+08   | 0.011129 | 0.13823  | 1.170764 | 9.370404 | 8.411538 | 2.251308231 |
| 24658425   | 0.002801 | 0.1005   | 1.171431 | 3.976752 | 2.822178 | 2.252350083 |
| .2348;1563 | 0.020323 | 0.16527  | 1.173597 | 7.38136  | 5.917839 | 2.255733824 |
| 89913162   | 0.002238 | 0.096252 | 1.179861 | 7.552828 | 6.515365 | 2.265550073 |
| 1.07E+08   | 0.027903 | 0.18402  | 1.180136 | 7.625006 | 6.687477 | 2.265981382 |
| '4148;1256 | 2.98E-05 | 0.022139 | 1.182394 | 9.01094  | 7.842144 | 2.269531164 |
| 1.07E+08   | 0.002761 | 0.10008  | 1.182517 | 4.39732  | 3.306402 | 2.269724322 |
| 43304172   | 0.010619 | 0.13645  | 1.183107 | 7.16692  | 6.093909 | 2.270652177 |
| '8556;5552 | 0.006391 | 0.11849  | 1.18563  | 5.573963 | 4.471007 | 2.274627615 |
| 89398779   | 0.004365 | 0.10974  | 1.194404 | 6.190107 | 5.091868 | 2.288502643 |
| 1.37E+08   | 0.003019 | 0.10081  | 1.196697 | 9.383004 | 8.267053 | 2.292143339 |
| 1.15E+08   | 0.001187 | 0.084659 | 1.198552 | 11.64643 | 10.46588 | 2.29509173  |
| 5870393    | 0.003443 | 0.10464  | 1.199556 | 12.45889 | 11.33003 | 2.296689346 |
| 1.33E+08   | 3.1E-06  | 0.003297 | 1.204015 | 1.229381 | 0        | 2.3038      |
| 9917397    | 3.1E-06  | 0.003297 | 1.204015 | 1.229381 | 0        | 2.3038      |
| 1.54E+08   | 3.1E-06  | 0.003297 | 1.204015 | 1.229381 | 0        | 2.3038      |
| 1.63E+08   | 3.1E-06  | 0.003297 | 1.204015 | 1.229381 | 0        | 2.3038      |
| ;5687;3428 | 3.1E-06  | 0.003297 | 1.204015 | 1.229381 | 0        | 2.3038      |
| 44219585   | 0.004787 | 0.11097  | 1.204015 | 1.453121 | 0        | 2.3038      |
| 81421878   | 0.030392 | 0.19094  | 1.204015 | 1.720601 | 0        | 2.3038      |
| 30417579   | 0.03361  | 0.19991  | 1.213561 | 8.511537 | 7.56839  | 2.319093405 |
| 79854971   | 0.035032 | 0.20373  | 1.22104  | 6.748317 | 5.702691 | 2.331146965 |
| '6071;1709 | 0.009781 | 0.13301  | 1.22143  | 6.0399   | 4.930512 | 2.331777565 |
| 65357509   | 0.001124 | 0.083992 | 1.223105 | 10.37934 | 9.264865 | 2.3344856   |
| 5749317    | 0.024972 | 0.17766  | 1.224413 | 7.48546  | 6.034847 | 2.336603127 |
| 58190198   | 0.023128 | 0.17248  | 1.227754 | 4.017443 | 2.685508 | 2.34202079  |



|           |          |          |          |          |          |             |
|-----------|----------|----------|----------|----------|----------|-------------|
| 0333;3399 | 0.00268  | 0.099169 | 1.228049 | 10.16581 | 8.840139 | 2.342500306 |
| 107605587 | 0.004478 | 0.10974  | 1.229687 | 8.932662 | 7.831683 | 2.345160892 |
| 14070     | 0.039544 | 0.21444  | 1.229708 | 11.4068  | 9.995387 | 2.345194627 |
| 1.37E+08  | 0.001314 | 0.086773 | 1.229711 | 9.224331 | 8.028168 | 2.345200205 |
| 3353;2458 | 0.001997 | 0.09233  | 1.231424 | 11.02442 | 9.915146 | 2.347985834 |
| 1.21E+08  | 0.005509 | 0.1157   | 1.234992 | 9.872211 | 8.779585 | 2.353801099 |
| 85639878  | 0.003218 | 0.10285  | 1.235619 | 8.993521 | 7.864025 | 2.354823473 |
| 1.84E+08  | 0.010812 | 0.1373   | 1.236718 | 8.368304 | 7.2973   | 2.356617989 |
| 25672239  | 0.003707 | 0.10504  | 1.237484 | 3.091507 | 1.935736 | 2.357870119 |
| 1.18E+08  | 2.48E-05 | 0.020498 | 1.24074  | 12.17512 | 10.95305 | 2.363197109 |
| 1.37E+08  | 0.003974 | 0.10733  | 1.245202 | 9.244893 | 8.049304 | 2.370517111 |
| 1.28E+08  | 0.000403 | 0.067603 | 1.245823 | 4.363487 | 2.989135 | 2.371537215 |
| 9043;3474 | 0.024476 | 0.17639  | 1.24633  | 7.404232 | 6.392171 | 2.372371404 |
| 1.56E+08  | 0.036799 | 0.20725  | 1.247372 | 5.508807 | 4.380031 | 2.374085279 |
| 35395630  | 0.020769 | 0.16614  | 1.250062 | 2.835302 | 1.212378 | 2.378516955 |
| 7334;1199 | 0.024252 | 0.17599  | 1.254536 | 8.814602 | 7.82608  | 2.385903886 |
| 3071;8070 | 0.010817 | 0.1373   | 1.254957 | 8.536616 | 7.347104 | 2.386599983 |
| 1.33E+08  | 0.00034  | 0.065605 | 1.262663 | 6.308855 | 5.002107 | 2.399382793 |
| 1.29E+08  | 0.013949 | 0.14631  | 1.264354 | 2.444127 | 0.776642 | 2.402195832 |
| 32571662  | 0.016802 | 0.15336  | 1.264354 | 2.388364 | 1.155984 | 2.402195832 |
| 20242181  | 0.014561 | 0.14768  | 1.267015 | 8.290463 | 6.982575 | 2.406630445 |
| 1.15E+08  | 0.001886 | 0.091058 | 1.267045 | 10.89437 | 9.66922  | 2.406681387 |
| 9794;9246 | 0.021678 | 0.16861  | 1.268605 | 9.560623 | 8.580617 | 2.409284771 |
| 7915;1085 | 0.031752 | 0.19455  | 1.272331 | 5.888533 | 4.983441 | 2.415514566 |
| 9904;1238 | 0.015179 | 0.148    | 1.274955 | 5.139227 | 4.161074 | 2.419913204 |
| 1.34E+08  | 0.016897 | 0.15375  | 1.275722 | 7.66901  | 6.214619 | 2.421200031 |
| 0501;1138 | 0.015739 | 0.14948  | 1.276039 | 6.313416 | 5.083175 | 2.421730905 |
| 1.64E+08  | 0.003504 | 0.10464  | 1.276619 | 11.36135 | 10.27743 | 2.42270541  |
| 3585;3399 | 0.016145 | 0.15124  | 1.278066 | 5.832334 | 4.599975 | 2.425136454 |
| 32817968  | 0.024576 | 0.17661  | 1.279708 | 3.346885 | 1.868444 | 2.427897882 |
| 71858342  | 0.023597 | 0.1741   | 1.280662 | 9.647815 | 8.651946 | 2.429504353 |
| 1.04E+08  | 0.016162 | 0.15124  | 1.282056 | 8.510106 | 7.249945 | 2.431853011 |
| 25145396  | 0.021262 | 0.16752  | 1.282471 | 6.673783 | 5.393729 | 2.432553436 |
| 7126;7141 | 0.000569 | 0.074299 | 1.285531 | 7.078926 | 5.871664 | 2.437717475 |
| 74386051  | 0.01318  | 0.14423  | 1.290845 | 7.596973 | 6.204479 | 2.446713998 |
| 1.02E+08  | 0.000391 | 0.067127 | 1.292228 | 9.681803 | 8.418028 | 2.449060048 |
| 93080017  | 0.001811 | 0.091058 | 1.294841 | 1.443686 | 0        | 2.4535      |
| 82794245  | 0.001811 | 0.091058 | 1.294841 | 1.443686 | 0        | 2.4535      |
| 1.27E+08  | 0.001811 | 0.091058 | 1.294841 | 1.443686 | 0        | 2.4535      |
| 89931862  | 0.002146 | 0.094928 | 1.294841 | 1.445056 | 0        | 2.4535      |
| 30513402  | 0.009735 | 0.13287  | 1.294841 | 1.591407 | 0        | 2.4535      |
| 6944;3218 | 0.020107 | 0.16503  | 1.294841 | 1.704255 | 0        | 2.4535      |
| 73484120  | 0.023029 | 0.17202  | 1.294841 | 1.536123 | 0.098849 | 2.4535      |
| 6984;2176 | 0.012758 | 0.14304  | 1.31417  | 10.3906  | 9.139025 | 2.48659176  |
| 77565674  | 0.020999 | 0.16684  | 1.31485  | 8.17934  | 6.970986 | 2.48776425  |
| 52727318  | 0.001003 | 0.081742 | 1.317619 | 8.538885 | 7.32519  | 2.492543353 |
| 1.05E+08  | 0.001572 | 0.089465 | 1.321701 | 8.313999 | 7.048659 | 2.499606501 |

|           |          |          |          |          |          |             |
|-----------|----------|----------|----------|----------|----------|-------------|
| 6178;5496 | 0.008033 | 0.12719  | 1.324359 | 11.43944 | 10.33974 | 2.504215502 |
| 30766927  | 0.042501 | 0.22119  | 1.325433 | 4.271979 | 3.287389 | 2.506080669 |
| 9104;1442 | 0.039568 | 0.21446  | 1.326046 | 3.075559 | 1.200671 | 2.507146776 |
| 2586;1409 | 0.01353  | 0.14539  | 1.335693 | 10.62756 | 9.484935 | 2.52396731  |
| 2280;1255 | 0.003999 | 0.10753  | 1.337559 | 9.82422  | 8.601626 | 2.527233651 |
| 66687234  | 0.006077 | 0.11773  | 1.33874  | 11.8519  | 10.70062 | 2.529303571 |
| 45563168  | 0.014726 | 0.14785  | 1.339119 | 7.415471 | 6.230815 | 2.529966912 |
| 1.92E+08  | 0.009827 | 0.13301  | 1.341022 | 5.390659 | 3.878473 | 2.533306294 |
| 6251;1378 | 0.038278 | 0.21101  | 1.342381 | 5.123328 | 3.409096 | 2.535693964 |
| 7184;5207 | 0.024882 | 0.17764  | 1.343032 | 5.168459 | 4.028877 | 2.536839257 |
| 8692;1239 | 0.017176 | 0.15403  | 1.344717 | 7.672897 | 6.310001 | 2.539803725 |
| 8499985   | 0.000109 | 0.043749 | 1.345466 | 12.99054 | 11.70395 | 2.541122761 |
| 10980162  | 0.008553 | 0.12952  | 1.347391 | 11.98554 | 10.76989 | 2.544515611 |
| 90773383  | 0.010196 | 0.13468  | 1.347537 | 7.981494 | 6.673008 | 2.544773272 |
| 99412826  | 0.016069 | 0.15095  | 1.347912 | 3.929255 | 2.471179 | 2.545434603 |
| 1256;1228 | 0.033868 | 0.20023  | 1.348574 | 7.421379 | 6.453519 | 2.546603602 |
| 1.23E+08  | 0.03952  | 0.21444  | 1.349798 | 7.532431 | 6.377643 | 2.548764748 |
| 1.02E+08  | 0.004868 | 0.11171  | 1.351776 | 9.560856 | 8.398097 | 2.552261298 |
| 6519;4592 | 0.005461 | 0.11563  | 1.354575 | 11.75009 | 10.43801 | 2.557216956 |
| 15714271  | 0.015026 | 0.14785  | 1.358766 | 2.496092 | 0.629119 | 2.564656336 |
| 1.49E+08  | 0.016678 | 0.15314  | 1.367634 | 7.902762 | 6.743036 | 2.580469483 |
| 43567060  | 0.00066  | 0.079206 | 1.370215 | 11.99256 | 10.56105 | 2.585090183 |
| 7410;1293 | 0.002433 | 0.096556 | 1.372294 | 3.795937 | 2.452489 | 2.588818953 |
| 1.38E+08  | 0.021211 | 0.16752  | 1.374011 | 4.731193 | 3.352848 | 2.591901268 |
| 40271616  | 5.1E-05  | 0.030782 | 1.377357 | 10.87783 | 9.546316 | 2.597920184 |
| 82307420  | 0.000815 | 0.080556 | 1.378391 | 10.42787 | 9.041849 | 2.599782519 |
| 62507755  | 0.026841 | 0.18212  | 1.378953 | 8.006972 | 6.612024 | 2.600795589 |
| 1.56E+08  | 0.016758 | 0.15336  | 1.385001 | 5.689658 | 4.519946 | 2.611720648 |
| 1.18E+08  | 0.033287 | 0.19924  | 1.385583 | 9.938795 | 8.764912 | 2.612775754 |
| 1.15E+08  | 0.008998 | 0.13115  | 1.395809 | 3.622352 | 2.194706 | 2.631361096 |
| 3969;9628 | 0.011412 | 0.13873  | 1.396944 | 6.416959 | 5.199719 | 2.633431161 |
| 51496611  | 0.034114 | 0.20075  | 1.397642 | 6.449767 | 5.104968 | 2.634705685 |
| 4635;8354 | 0.007592 | 0.12553  | 1.410243 | 7.306164 | 6.16843  | 2.657818671 |
| 6658;8953 | 0.005311 | 0.11503  | 1.410575 | 5.548418 | 4.248413 | 2.658431777 |
| 1.44E+08  | 0.000596 | 0.075614 | 1.411205 | 9.159344 | 7.82603  | 2.65959225  |
| 98446550  | 0.006459 | 0.11897  | 1.412099 | 11.52764 | 10.14365 | 2.661240231 |
| 5480;3094 | 0.029311 | 0.18763  | 1.41417  | 6.429288 | 5.140114 | 2.665063166 |
| 9924;1267 | 0.001898 | 0.091058 | 1.414292 | 9.779003 | 8.286935 | 2.665288679 |
| 66225806  | 0.025837 | 0.17955  | 1.414362 | 6.040323 | 4.929512 | 2.66541927  |
| 1.2E+08   | 0.012852 | 0.14321  | 1.41509  | 7.32841  | 5.864254 | 2.666763724 |
| 8086;4855 | 0.008143 | 0.12791  | 1.420543 | 3.813285 | 2.451955 | 2.67686184  |
| 24598682  | 0.017224 | 0.15418  | 1.422453 | 12.38761 | 10.8838  | 2.680407927 |
| 21073514  | 0.003017 | 0.10081  | 1.422463 | 8.29234  | 6.94078  | 2.680426961 |
| 25345562  | 0.001848 | 0.091058 | 1.433761 | 8.995335 | 7.561121 | 2.70149993  |
| 1.23E+08  | 0.011596 | 0.13937  | 1.442477 | 11.36743 | 10.19952 | 2.71787048  |
| 1.54E+08  | 0.008348 | 0.1286   | 1.443121 | 8.265734 | 7.062462 | 2.719083603 |
| 93690991  | 0.007124 | 0.12355  | 1.445868 | 7.709501 | 6.124414 | 2.724266472 |

|           |          |          |          |          |          |             |
|-----------|----------|----------|----------|----------|----------|-------------|
| 81960930  | 0.001423 | 0.087457 | 1.44976  | 10.98027 | 9.642101 | 2.731626206 |
| 79668536  | 0.008667 | 0.13036  | 1.450486 | 6.540266 | 4.980284 | 2.733001735 |
| 48275358  | 0.028221 | 0.18472  | 1.456125 | 3.534503 | 1.870404 | 2.743704508 |
| 4448325   | 0.012327 | 0.14156  | 1.463866 | 2.910604 | 1.367334 | 2.758466113 |
| 3370;3640 | 0.001575 | 0.089465 | 1.468746 | 9.377026 | 8.02686  | 2.767811166 |
| 105996423 | 0.014057 | 0.14644  | 1.471821 | 5.240793 | 3.939549 | 2.773717028 |
| 9469324   | 0.003484 | 0.10464  | 1.477738 | 7.688078 | 6.362514 | 2.785117549 |
| 37419036  | 0.015865 | 0.1501   | 1.479222 | 6.234043 | 5.10449  | 2.787982643 |
| 8832;3804 | 0.015293 | 0.1481   | 1.483777 | 6.095718 | 4.427602 | 2.796799208 |
| 9492;2547 | 0.00872  | 0.13079  | 1.486145 | 5.216627 | 3.858271 | 2.801393351 |
| 2385;4631 | 0.004022 | 0.10764  | 1.492406 | 9.576555 | 8.233508 | 2.813578561 |
| 1.15E+08  | 0.029307 | 0.18763  | 1.505792 | 8.236956 | 6.994704 | 2.839805568 |
| 8649;1115 | 0.006335 | 0.11846  | 1.516261 | 8.757402 | 7.480151 | 2.860487983 |
| 1.3E+08   | 0.00387  | 0.1071   | 1.519218 | 6.340375 | 5.005062 | 2.866356069 |
| 171649007 | 0.0349   | 0.20347  | 1.524502 | 3.313304 | 2.139807 | 2.876873322 |
| 1.36E+08  | 0.011234 | 0.13856  | 1.525924 | 9.363215 | 8.025173 | 2.879710562 |
| 54028090  | 0.021926 | 0.16957  | 1.534365 | 5.962205 | 4.431213 | 2.896608567 |
| 4336;1352 | 0.001174 | 0.084659 | 1.539217 | 6.221536 | 4.712096 | 2.906366921 |
| 5650;1108 | 0.011124 | 0.13823  | 1.540634 | 6.321147 | 4.44548  | 2.909224196 |
| 1.16E+08  | 0.029965 | 0.18967  | 1.548    | 3.032518 | 1.580014 | 2.924114233 |
| 1307;2923 | 0.001078 | 0.083992 | 1.548273 | 9.367401 | 7.982027 | 2.924667759 |
| 75264208  | 0.018426 | 0.15788  | 1.54881  | 5.818533 | 4.61444  | 2.925757171 |
| 1.13E+08  | 0.011982 | 0.14071  | 1.561939 | 10.08306 | 8.727007 | 2.952504371 |
| 1.08E+08  | 0.008051 | 0.12727  | 1.565953 | 9.913132 | 8.568477 | 2.960729747 |
| 15542472  | 0.002619 | 0.098152 | 1.569397 | 4.313471 | 2.729235 | 2.967806227 |
| 47386167  | 0.001178 | 0.084659 | 1.572897 | 7.725305 | 6.146034 | 2.975015735 |
| 65037336  | 0.044995 | 0.22685  | 1.583011 | 5.700057 | 3.536951 | 2.995944951 |
| 66561046  | 0.002932 | 0.10081  | 1.583078 | 6.359721 | 4.712346 | 2.996083063 |
| 1.57E+08  | 0.001791 | 0.091058 | 1.5846   | 8.757877 | 7.072885 | 2.999246911 |
| 1.03E+08  | 0.006942 | 0.12202  | 1.58569  | 10.8171  | 9.402018 | 3.001514206 |
| 13224965  | 0.003578 | 0.10464  | 1.586966 | 6.195047 | 4.603316 | 3.004168718 |
| 1.34E+08  | 0.002391 | 0.096556 | 1.588189 | 11.21505 | 9.730269 | 3.006717057 |
| 83846790  | 0.039093 | 0.2134   | 1.598765 | 4.170658 | 2.95407  | 3.028838528 |
| 40142254  | 0.008468 | 0.12911  | 1.599221 | 8.395789 | 6.91544  | 3.02979685  |
| 61990361  | 0.018135 | 0.15751  | 1.600025 | 10.12718 | 8.769151 | 3.031485833 |
| 101370125 | 0.028646 | 0.18598  | 1.600833 | 5.732581 | 4.448393 | 3.033183434 |
| 15889545  | 0.006157 | 0.11826  | 1.60197  | 7.723954 | 6.113715 | 3.035575937 |
| 90076095  | 0.000923 | 0.080556 | 1.602747 | 11.47715 | 9.676766 | 3.037209947 |
| 1.07E+08  | 0.027349 | 0.18326  | 1.610488 | 2.502485 | 0.776642 | 3.053551423 |
| 21506524  | 0.029072 | 0.18722  | 1.610488 | 2.764065 | 1.515607 | 3.053551423 |
| 20931524  | 0.011295 | 0.1386   | 1.612028 | 8.025101 | 6.310949 | 3.056811764 |
| 8774;8384 | 0.014784 | 0.14785  | 1.612646 | 8.364024 | 6.972185 | 3.058122753 |
| 3349;7436 | 0.010922 | 0.13733  | 1.615136 | 8.37873  | 6.798073 | 3.063405745 |
| 45694556  | 0.013208 | 0.14423  | 1.61695  | 4.235827 | 2.741957 | 3.067259875 |
| 9438;1961 | 0.013558 | 0.14545  | 1.619833 | 9.008109 | 7.633286 | 3.073395447 |
| 93045022  | 0.002781 | 0.10033  | 1.62536  | 6.896766 | 5.39242  | 3.085190568 |
| 7019;1166 | 0.006568 | 0.11928  | 1.63572  | 10.55387 | 9.089926 | 3.107426175 |

|            |          |          |          |          |          |             |
|------------|----------|----------|----------|----------|----------|-------------|
| 1.67E+08   | 0.004094 | 0.10842  | 1.63697  | 11.26667 | 9.80531  | 3.110119044 |
| 6219;5148  | 3.41E-05 | 0.023775 | 1.670146 | 5.407975 | 3.725919 | 3.18246892  |
| .2662;6790 | 0.004826 | 0.11123  | 1.674336 | 7.430828 | 5.91701  | 3.191723221 |
| 8370;7746  | 0.010424 | 0.13614  | 1.675952 | 5.453748 | 4.079622 | 3.195300485 |
| 70582571   | 0.003962 | 0.10733  | 1.677593 | 9.139653 | 7.504051 | 3.198937591 |
| ;87980451; | 0.005019 | 0.11266  | 1.680556 | 11.71037 | 10.23279 | 3.205514517 |
| 58499742   | 0.012714 | 0.14304  | 1.693433 | 9.364745 | 7.979777 | 3.234254335 |
| 80014808   | 0.011037 | 0.13797  | 1.703002 | 10.84551 | 9.431653 | 3.255778294 |
| '7029;9877 | 0.031586 | 0.19428  | 1.704829 | 3.695637 | 1.72346  | 3.259903602 |
| 55906949   | 0.013847 | 0.14588  | 1.706976 | 7.670734 | 6.240606 | 3.264757505 |
| 1.01E+08   | 0.003952 | 0.10733  | 1.709792 | 6.018435 | 4.185593 | 3.271135987 |
| 39642678   | 0.003259 | 0.10317  | 1.711664 | 7.640279 | 5.832909 | 3.275383905 |
| 80932204   | 0.000551 | 0.073734 | 1.717897 | 9.593761 | 8.005361 | 3.289566068 |
| ;17223932; | 0.016396 | 0.15172  | 1.721888 | 7.768425 | 6.210712 | 3.298678676 |
| 14545036   | 0.03306  | 0.19883  | 1.731158 | 7.947155 | 6.223182 | 3.319941936 |
| 67037407   | 0.00124  | 0.086071 | 1.731839 | 9.243733 | 7.541718 | 3.321510514 |
| 1.16E+08   | 0.005808 | 0.11645  | 1.735926 | 7.910946 | 6.206482 | 3.330933135 |
| 1.44E+08   | 0.009339 | 0.1313   | 1.737234 | 6.361887 | 4.71865  | 3.333952613 |
| 70459984   | 0.0159   | 0.15012  | 1.750081 | 10.32301 | 8.703081 | 3.363774107 |
| 71730966   | 0.004451 | 0.10974  | 1.7651   | 4.859897 | 2.851142 | 3.398976234 |
| ;4282928;3 | 0.027774 | 0.18396  | 1.767458 | 4.193845 | 2.611856 | 3.404535811 |
| 83706269   | 0.027014 | 0.18269  | 1.770232 | 5.256544 | 3.189252 | 3.411088066 |
| 1.09E+08   | 0.007338 | 0.12456  | 1.776465 | 7.909075 | 6.174832 | 3.425857369 |
| '5122;1301 | 0.003234 | 0.10285  | 1.776615 | 12.19323 | 10.48297 | 3.426212441 |
| 1.23E+08   | 0.000747 | 0.080556 | 1.778359 | 9.708975 | 8.000016 | 3.430358334 |
| 1.31E+08   | 0.00589  | 0.11645  | 1.78333  | 8.353319 | 6.771164 | 3.442196934 |
| 1.16E+08   | 0.002627 | 0.098152 | 1.784753 | 11.8426  | 10.10182 | 3.445594772 |
| 93957100   | 0.006997 | 0.1223   | 1.812788 | 6.838428 | 5.323179 | 3.513206348 |
| 9266;7595; | 0.009364 | 0.1313   | 1.813302 | 5.378543 | 3.711663 | 3.514456516 |
| 4272514    | 0.014708 | 0.14782  | 1.823336 | 7.035486 | 5.494319 | 3.538986081 |
| '6996;6427 | 0.009608 | 0.1322   | 1.82823  | 7.394952 | 5.235573 | 3.551011268 |
| 29248467   | 0.00231  | 0.096369 | 1.831107 | 7.187361 | 5.177063 | 3.558100066 |
| 1.01E+08   | 0.00664  | 0.11984  | 1.832201 | 1.819528 | 0        | 3.5608      |
| 59794959   | 0.00664  | 0.11984  | 1.832201 | 1.819528 | 0        | 3.5608      |
| 34716662   | 0.038357 | 0.21113  | 1.832201 | 1.659361 | 0.379343 | 3.5608      |
| 0657;1281; | 0.016684 | 0.15314  | 1.836587 | 4.807995 | 3.144283 | 3.571641204 |
| 79359076   | 0.011031 | 0.13797  | 1.837248 | 8.621344 | 6.918635 | 3.573276481 |
| ;72235746; | 0.014237 | 0.14678  | 1.842415 | 7.864944 | 6.260476 | 3.586098841 |
| 6099;5329; | 0.000979 | 0.081251 | 1.846802 | 6.191271 | 4.454094 | 3.597019799 |
| 37654172   | 0.007377 | 0.1247   | 1.851039 | 1.91993  | 0        | 3.6076      |
| 06359;1019 | 0.016957 | 0.15385  | 1.851039 | 1.883101 | 0.379343 | 3.6076      |
| '8559;6243 | 0.018211 | 0.15761  | 1.851039 | 1.883101 | 0.386005 | 3.6076      |
| 50911846   | 0.033181 | 0.19902  | 1.851039 | 2.174151 | 0        | 3.6076      |
| 74998031   | 0.00459  | 0.10974  | 1.861448 | 6.919761 | 5.15172  | 3.633720781 |
| 30419854   | 0.004153 | 0.10875  | 1.875522 | 3.201988 | 1.365394 | 3.669344459 |
| 77915393   | 0.017708 | 0.15571  | 1.877931 | 4.26632  | 2.689351 | 3.675476269 |
| 1.17E+08   | 0.018206 | 0.15761  | 1.879956 | 11.48993 | 9.810562 | 3.680639466 |

|            |          |          |          |          |          |             |
|------------|----------|----------|----------|----------|----------|-------------|
| 35202007   | 0.035672 | 0.20522  | 1.880333 | 3.413269 | 1.186107 | 3.681600376 |
| 96228933   | 0.00789  | 0.12631  | 1.888901 | 8.247253 | 6.404332 | 3.703528776 |
| 1.17E+08   | 0.001646 | 0.090935 | 1.916216 | 11.0788  | 9.271396 | 3.774317849 |
| 1.27E+08   | 0.017671 | 0.15566  | 1.931978 | 9.359046 | 7.786117 | 3.815779526 |
| 83593087   | 0.011939 | 0.14071  | 1.939923 | 8.212378 | 5.942385 | 3.836851201 |
| 83578636   | 0.016231 | 0.15133  | 1.9445   | 7.342089 | 5.132624 | 3.849044724 |
| 47189402   | 0.001472 | 0.087831 | 1.945417 | 8.652502 | 6.805678 | 3.851489665 |
| 1.38E+08   | 0.000351 | 0.065605 | 1.952241 | 7.843552 | 5.844898 | 3.869750925 |
| 12967;7534 | 0.00672  | 0.12037  | 1.956105 | 11.95477 | 10.11478 | 3.880128919 |
| 24475873   | 0.004124 | 0.10842  | 1.957694 | 7.714705 | 5.858311 | 3.88440585  |
| 53612096   | 0.000938 | 0.080556 | 1.961628 | 5.124208 | 3.156221 | 3.895011765 |
| 1.08E+08   | 0.042894 | 0.22177  | 1.964961 | 5.77336  | 3.641717 | 3.9040206   |
| 23677449   | 0.000168 | 0.053538 | 1.9651   | 11.47514 | 9.437828 | 3.904398848 |
| 3926841    | 0.015493 | 0.1486   | 1.966061 | 2.030822 | 0.386005 | 3.907       |
| 1.23E+08   | 0.016926 | 0.15376  | 1.966061 | 2.14367  | 0.379343 | 3.907       |
| 73026890   | 0.018178 | 0.15758  | 1.966061 | 2.152643 | 0.386005 | 3.907       |
| 1.17E+08   | 0.007452 | 0.1247   | 1.986329 | 4.678493 | 2.818364 | 3.962276153 |
| 5455938    | 0.016415 | 0.15182  | 2.003729 | 5.570795 | 3.50745  | 4.01035168  |
| 8163;3496  | 0.000996 | 0.081742 | 2.01745  | 6.623424 | 4.52627  | 4.048674126 |
| 9540;1625  | 0.043642 | 0.2235   | 2.024523 | 5.999622 | 4.294604 | 4.068572221 |
| 84696221   | 0.009276 | 0.1313   | 2.030283 | 9.880358 | 8.184922 | 4.084848943 |
| 45369708   | 0.009566 | 0.13188  | 2.041757 | 8.003123 | 6.259095 | 4.117465624 |
| 128117068  | 0.00246  | 0.096556 | 2.047657 | 8.982041 | 7.143099 | 4.134340539 |
| 7844;8837  | 0.000832 | 0.080556 | 2.054252 | 12.46572 | 10.59489 | 4.153281889 |
| 7183;1241  | 0.039735 | 0.21457  | 2.063894 | 5.981452 | 4.41685  | 4.181132505 |
| 93745972   | 0.02253  | 0.17074  | 2.079982 | 7.47483  | 5.471138 | 4.228019449 |
| 14677;2305 | 0.015969 | 0.15026  | 2.085905 | 7.8331   | 5.747932 | 4.245414633 |
| 16318334   | 0.000854 | 0.080556 | 2.088851 | 7.988583 | 6.091913 | 4.254091423 |
| 1.3E+08    | 0.000185 | 0.053655 | 2.101721 | 11.9552  | 9.927507 | 4.292209828 |
| 4964348    | 0.01548  | 0.1486   | 2.110757 | 4.302262 | 2.42547  | 4.319178888 |
| 35826559   | 0.019448 | 0.16215  | 2.133806 | 5.567935 | 3.808936 | 4.388738206 |
| 1.81E+08   | 0.001488 | 0.088523 | 2.153157 | 6.318562 | 4.291812 | 4.448000764 |
| 1.2E+08    | 0.000495 | 0.070995 | 2.171212 | 7.195861 | 5.04447  | 4.504017122 |
| 6036;8487  | 0.006358 | 0.11846  | 2.18816  | 10.30793 | 8.442548 | 4.557239118 |
| 8768;5145  | 0.006845 | 0.12106  | 2.19672  | 7.725564 | 5.633369 | 4.584360385 |
| 24701556   | 0.01173  | 0.13986  | 2.201057 | 6.749437 | 4.900029 | 4.598160142 |
| 1.23E+08   | 0.001197 | 0.084815 | 2.215765 | 7.998904 | 6.017618 | 4.645278417 |
| 1.42E+08   | 0.00226  | 0.096252 | 2.268644 | 8.913493 | 6.924144 | 4.818700449 |
| 87371074   | 0.017007 | 0.15386  | 2.273565 | 6.181472 | 4.123158 | 4.835164124 |
| 1.33E+08   | 3.4E-05  | 0.023775 | 2.275365 | 2.179177 | 0        | 4.8412      |
| 1.35E+08   | 0.00687  | 0.1213   | 2.275365 | 1.967249 | 0        | 4.8412      |
| 3864;1296  | 0.013675 | 0.14577  | 2.275365 | 2.182924 | 0.390637 | 4.8412      |
| 3483;1204  | 0.036609 | 0.2067   | 2.275365 | 1.955437 | 0.386005 | 4.8412      |
| 1.24E+08   | 0.008204 | 0.1283   | 2.278291 | 5.806264 | 3.263858 | 4.851030727 |
| 1.21E+08   | 0.001878 | 0.091058 | 2.287158 | 6.519872 | 4.494373 | 4.880936433 |
| 1.16E+08   | 0.013446 | 0.14498  | 2.296105 | 2.183558 | 0.386005 | 4.9113      |
| 1.11E+08   | 0.015667 | 0.14918  | 2.296105 | 2.177609 | 0        | 4.9113      |

|             |          |          |          |          |          |             |
|-------------|----------|----------|----------|----------|----------|-------------|
| 17105825    | 0.001358 | 0.087364 | 2.308719 | 10.49968 | 8.294239 | 4.954429594 |
| 10558207    | 0.004053 | 0.10795  | 2.314115 | 9.91417  | 7.82027  | 4.972995832 |
| 74364000    | 0.003985 | 0.10743  | 2.322278 | 4.825336 | 2.796205 | 5.001214137 |
| 4477143     | 0.000536 | 0.073353 | 2.354391 | 9.847009 | 7.564368 | 5.113782527 |
| 1.08E+08    | 0.038631 | 0.21204  | 2.368647 | 6.163786 | 3.280586 | 5.164565403 |
| 43803133    | 0.002925 | 0.10081  | 2.395092 | 8.351772 | 6.116415 | 5.260105603 |
| ;12508522;  | 0.005886 | 0.11645  | 2.408357 | 10.09959 | 7.858909 | 5.308692364 |
| 46844333    | 0.009262 | 0.1313   | 2.41     | 6.017539 | 3.844991 | 5.31474319  |
| ;91136141;  | 0.000748 | 0.080556 | 2.415242 | 11.65288 | 9.375686 | 5.334090771 |
| 1.27E+08    | 0.013259 | 0.14436  | 2.421685 | 7.712964 | 5.650049 | 5.357965015 |
| 14914889    | 0.028387 | 0.1851   | 2.441005 | 2.752111 | 0.406777 | 5.4302      |
| 1.66E+08    | 0.00263  | 0.098152 | 2.442269 | 11.19175 | 9.0145   | 5.434957164 |
| 97018355    | 0.001029 | 0.083045 | 2.446937 | 9.171869 | 6.825725 | 5.452573304 |
| 1.56E+08    | 0.037509 | 0.20972  | 2.463894 | 5.976825 | 4.005483 | 5.517039225 |
| 34819894    | 0.015913 | 0.15012  | 2.468594 | 8.894897 | 6.79936  | 5.535040186 |
| 29100722    | 0.005296 | 0.11503  | 2.490678 | 9.51581  | 7.191999 | 5.620421013 |
| 42307989    | 0.000196 | 0.054707 | 2.504514 | 10.4221  | 8.112356 | 5.674581238 |
| 25627974    | 0.017663 | 0.15566  | 2.510479 | 8.069713 | 5.620909 | 5.698092932 |
| 1958;1282;  | 0.00133  | 0.086773 | 2.534842 | 8.980506 | 6.693663 | 5.795134424 |
| 40134228    | 0.005033 | 0.11266  | 2.539657 | 7.396615 | 5.262624 | 5.814506314 |
| 1.15E+08    | 4.88E-06 | 0.00474  | 2.602089 | 8.866708 | 6.234122 | 6.071652896 |
| 1.52E+08    | 0.004542 | 0.10974  | 2.63736  | 10.70322 | 8.293074 | 6.221920271 |
| 1.46E+08    | 0.005928 | 0.11684  | 2.655748 | 12.14731 | 9.636431 | 6.301731842 |
| 9850;1048;  | 0.005502 | 0.1157   | 2.663501 | 7.352822 | 4.923284 | 6.33568802  |
| '8718;8497; | 0.00287  | 0.10081  | 2.699622 | 9.156018 | 6.698976 | 6.496317616 |
| 89311032    | 0.00916  | 0.13115  | 2.705749 | 7.802758 | 4.7553   | 6.523965071 |
| 50443613    | 0.024363 | 0.1761   | 2.715093 | 8.714811 | 6.194865 | 6.566355498 |
| 1.38E+08    | 0.000262 | 0.062198 | 2.72019  | 7.327412 | 4.694208 | 6.589596495 |
| 1.38E+08    | 0.002834 | 0.10065  | 2.783213 | 7.364189 | 4.600707 | 6.883837555 |
| 15010184    | 0.000476 | 0.070995 | 2.801428 | 2.910298 | 0        | 6.9713      |
| 91362404    | 8.74E-05 | 0.039815 | 2.817561 | 8.993237 | 6.335292 | 7.049693549 |
| 98854747    | 7.6E-05  | 0.037696 | 2.836794 | 8.874882 | 6.110943 | 7.144308754 |
| 1.23E+08    | 0.001443 | 0.087736 | 2.853062 | 6.973098 | 4.176848 | 7.22532477  |
| 1.08E+08    | 0.001623 | 0.090935 | 2.895145 | 6.423009 | 3.741776 | 7.439188377 |
| 69489233    | 0.014691 | 0.14782  | 2.899038 | 4.049434 | 1.120144 | 7.459287475 |
| 10401;1154; | 0.010171 | 0.13468  | 2.899885 | 5.557917 | 3.130916 | 7.463668592 |
| 11081103    | 0.020137 | 0.16503  | 2.921465 | 4.314092 | 1.925881 | 7.5761531   |
| 82047523    | 0.025626 | 0.17945  | 2.94845  | 3.91444  | 1.235037 | 7.719193021 |
| 45318450    | 0.00558  | 0.11644  | 2.971538 | 8.066793 | 5.407617 | 7.843722516 |
| 30168;4425; | 0.002935 | 0.10081  | 2.99348  | 10.04424 | 7.359311 | 7.963927038 |
| 9708;4611;  | 0.000895 | 0.080556 | 3.04911  | 7.643083 | 4.807597 | 8.277011015 |
| 34044313    | 0.00448  | 0.10974  | 3.066887 | 3.863343 | 0.76998  | 8.379634678 |
| 1.52E+08    | 0.002339 | 0.096556 | 3.076132 | 9.77861  | 6.987697 | 8.433504446 |
| 1.45E+08    | 0.002576 | 0.098108 | 3.129744 | 6.1238   | 2.927999 | 8.752795998 |
| 7510242     | 0.008589 | 0.12996  | 3.14122  | 2.976954 | 0        | 8.8227      |
| 1.08E+08    | 0.002383 | 0.096556 | 3.161169 | 7.089943 | 4.0744   | 8.945543478 |
| 36324029    | 0.000203 | 0.054854 | 3.244267 | 10.10441 | 7.06025  | 9.475923888 |

|             |          |          |          |          |          |             |
|-------------|----------|----------|----------|----------|----------|-------------|
| 23745521    | 0.006672 | 0.11994  | 3.287546 | 3.438339 | 0.503536 | 9.7645      |
| 107876840   | 0.001687 | 0.091058 | 3.295448 | 9.997294 | 7.031743 | 9.818130989 |
| 90893115    | 0.000487 | 0.070995 | 3.349152 | 5.705581 | 2.305642 | 10.19049178 |
| 94126085    | 0.027932 | 0.18402  | 3.359568 | 4.354852 | 1.228837 | 10.26433121 |
| 1.01E+08    | 0.006744 | 0.12058  | 3.394359 | 7.69238  | 4.277154 | 10.51486691 |
| 6777;4165   | 0.009413 | 0.1313   | 3.482125 | 3.123793 | 0        | 11.1744     |
| 1.28E+08    | 0.002152 | 0.094928 | 3.491204 | 6.758304 | 3.1632   | 11.24493601 |
| 37483529    | 1.66E-05 | 0.015421 | 3.514779 | 3.549021 | 0        | 11.4302     |
| 90905938    | 0.010711 | 0.13701  | 3.514779 | 3.249195 | 0.386005 | 11.4302     |
| 35822911    | 0.002737 | 0.10008  | 3.526164 | 9.878733 | 6.78747  | 11.52076118 |
| 24351491    | 0.006519 | 0.11911  | 3.561122 | 6.921229 | 3.749697 | 11.80332708 |
| l;3502799;5 | 0.004305 | 0.10962  | 3.571496 | 7.229836 | 3.966959 | 11.88851211 |
| 6317;1193   | 0.000871 | 0.080556 | 3.621845 | 7.08632  | 3.551838 | 12.31073142 |
| 5060383     | 0.00107  | 0.083992 | 3.654272 | 8.314636 | 4.586417 | 12.59057557 |
| 82212815    | 0.000616 | 0.076008 | 3.672935 | 8.427313 | 5.044403 | 12.7545052  |
| 78242683    | 0.026211 | 0.18024  | 3.673316 | 6.818986 | 2.253703 | 12.75787605 |
| 78373466    | 0.000362 | 0.065605 | 3.811245 | 3.879639 | 0        | 14.0378     |
| .8039;1911  | 0.000542 | 0.073353 | 3.880657 | 9.61828  | 5.923114 | 14.72970839 |
| 83534140    | 0.002933 | 0.10081  | 3.932001 | 10.01108 | 6.405141 | 15.2633679  |
| 36119844    | 0.024492 | 0.17639  | 4.108218 | 6.610648 | 2.693954 | 17.24633835 |
| 84879755    | 0.00358  | 0.10464  | 4.138056 | 5.712775 | 1.331494 | 17.60673963 |
| 76323578    | 0.001609 | 0.090483 | 4.149109 | 6.633084 | 2.427726 | 17.74215237 |
| 1.19E+08    | 0.001812 | 0.091058 | 4.208685 | 7.923509 | 3.506718 | 18.4901542  |
| 82037452    | 0.012803 | 0.14304  | 4.219576 | 6.510378 | 2.664079 | 18.63026616 |
| 36273425    | 0.000225 | 0.05508  | 4.22548  | 9.118241 | 5.134791 | 18.70666299 |
| 1.2E+08     | 0.00467  | 0.11016  | 4.411129 | 5.203434 | 1.513647 | 21.27562026 |
| 92348889    | 0.000291 | 0.065605 | 4.946599 | 8.199523 | 3.558719 | 30.83718969 |
| 45615490    | 0.00459  | 0.10974  | 5.060865 | 6.372275 | 2.214913 | 33.37891795 |
| 89324730    | 0.008917 | 0.13085  | 5.178001 | 5.083691 | 0.603316 | 36.2021     |
| 82260753    | 0.000454 | 0.070921 | 5.222542 | 5.380143 | 0.379343 | 37.3372     |
| 1.35E+08    | 0.002094 | 0.093854 | 6.238036 | 10.34675 | 4.853272 | 75.48069739 |
| 5881;9248   | 0.007661 | 0.12553  | 6.567913 | 5.597193 | 0.386005 | 94.8722     |
| '0061;1181  | 6.53E-05 | 0.034717 | 6.845255 | 10.62616 | 4.03253  | 114.9812503 |

**Supporting Information Table S2.** Gene set e  
determined by RNA-Seq analysis.

| <b>Gene Set Name</b>      |                                                 |
|---------------------------|-------------------------------------------------|
| <b>HALLMARK Gene Sets</b> | TNFA SIGNALING VIA NFKB                         |
|                           | INFLAMMATORY RESPONSE                           |
|                           | APOPTOSIS                                       |
|                           | P53 PATHWAY                                     |
|                           | IL2 STAT5 SIGNALING                             |
|                           | ALLOGRAFT REJECTION                             |
|                           | COMPLEMENT                                      |
|                           | EPITHELIAL MESENCHYMAL<br>TRANSITION            |
|                           | ESTROGEN RESPONSE EARLY                         |
|                           | HYPOXIA                                         |
| <b>CURATED Gene Sets</b>  | CHEN METABOLIC SYNDROM<br>NETWORK               |
|                           | YOSHIMURA MAPK8 TARGETS UP                      |
|                           | MEISSNER BRAIN HCP WITH H3K4ME3<br>AND H3K27ME3 |
|                           | BENPORATH ES WITH H3K27ME3                      |
|                           | BENPORATH SUZ12 TARGETS                         |
|                           | BENPORATH EED TARGETS                           |
|                           | NABA MATRISOME                                  |
|                           | ZWANG TRANSIENTLY UP BY 2ND EGF<br>PULSE ONLY   |
|                           | WONG ADULT TISSUE STEM MODULE                   |
|                           | DELYS THYROID CANCER UP                         |
|                           | MEMBRANE                                        |
|                           | PLASMA MEMBRANE                                 |
|                           | MEMBRANE PART                                   |
|                           | PLASMA MEMBRANE PART                            |
|                           | INTRINSIC TO MEMBRANE                           |



**GO Gene SETS**

---

INTEGRAL TO MEMBRANE

---

SIGNAL TRANSDUCTION

---

INTRINSIC TO PLASMA MEMBRANE

---

INTEGRAL TO PLASMA MEMBRANE

---

ESTABLISHMENT OF LOCALIZATION

---

CYTOPLASM

---

MULTICELLULAR ORGANISMAL  
DEVELOPMENT

---

CELL CELL SIGNALING

---

EXTRACELLULAR REGION

---

RECEPTOR ACTIVITY

---

RESPONSE TO EXTERNAL STIMULUS

---

ANATOMICAL STRUCTURE  
DEVELOPMENT

---

TRANSPORT

---

RESPONSE TO STRESS

---

SYSTEM DEVELOPMENT

---

enrichments on select Molecular Signatures Databases (MSigDB) collections for genes in response

| <b>Description</b>                                                                                                                                                                                                                                                    |
|-----------------------------------------------------------------------------------------------------------------------------------------------------------------------------------------------------------------------------------------------------------------------|
| Genes regulated by NF-kB in response to TNF [GeneID=7124].                                                                                                                                                                                                            |
| Genes defining inflammatory response.                                                                                                                                                                                                                                 |
| Genes mediating programmed cell death (apoptosis) by activation of caspases.                                                                                                                                                                                          |
| Genes involved in p53 pathways and networks.                                                                                                                                                                                                                          |
| Genes up-regulated by STAT5 in response to IL2 stimulation.                                                                                                                                                                                                           |
| Genes up-regulated during transplant rejection.                                                                                                                                                                                                                       |
| Genes encoding components of the complement system, which is part of the innate immune system.                                                                                                                                                                        |
| Genes defining epithelial-mesenchymal transition, as in wound healing, fibrosis and metastasis.                                                                                                                                                                       |
| Genes defining early response to estrogen.                                                                                                                                                                                                                            |
| Genes up-regulated in response to low oxygen levels (hypoxia).                                                                                                                                                                                                        |
| Genes forming the macrophage-enriched metabolic network (MEMN) claimed to have a causal relationship with the metabolic syndrom traits.                                                                                                                               |
| Genes up-regulated in vascular smooth muscle cells (VSMC) by MAPK8 (JNK1) [GeneID=5599].                                                                                                                                                                              |
| Genes with high-CpG-density promoters (HCP) bearing histone H3 dimethylation at K4 (H3K4me2) and trimethylation at K27 (H3K27me3) in brain.                                                                                                                           |
| Set 'H3K27 bound': genes possessing the trimethylated H3K27 (H3K27me3) mark in their promoters in human embryonic stem cells, as identified by ChIP on chip.                                                                                                          |
| Set 'Suz12 targets': genes identified by ChIP on chip as targets of the Polycomb protein SUZ12 [GeneID=23512] in human embryonic stem cells.                                                                                                                          |
| Set 'Eed targets': genes identified by ChIP on chip as targets of the Polycomb protein EED [GeneID=8726] in human embryonic stem cells.                                                                                                                               |
| Ensemble of genes encoding extracellular matrix and extracellular matrix-associated proteins                                                                                                                                                                          |
| Genes transiently induced only by the second pulse of EGF [GeneID =1950] in 184A1 cells (mammary epithelium).                                                                                                                                                         |
| The 'adult tissue stem' module: genes coordinately up-regulated in a compendium of adult tissue stem cells.                                                                                                                                                           |
| Genes up-regulated in papillary thyroid carcinoma (PTC) compared to normal tissue.                                                                                                                                                                                    |
| GO:0016020. Double layer of lipid molecules that encloses all cells, and, in eukaryotes, many organelles; may be a single or double lipid bilayer; also includes associated proteins.                                                                                 |
| GO:0005886. The membrane surrounding a cell that separates the cell from its external environment. It consists of a phospholipid bilayer and associated proteins.                                                                                                     |
| GO:0044425. Any constituent part of a membrane, a double layer of lipid molecules that encloses all cells, and, in eukaryotes, many organelles; may be a single or double lipid bilayer; also includes associated proteins.                                           |
| GO:0044459. Any constituent part of the plasma membrane, the membrane surrounding a cell that separates the cell from its external environment. It consists of a phospholipid bilayer and associated proteins.                                                        |
| GO:0031224. Located in a membrane such that some covalently attached portion of the gene product, for example part of a peptide sequence or some other covalently attached moiety such as a GPI anchor, spans or is embedded in one or both leaflets of the membrane. |

GO:0016021. Penetrating at least one phospholipid bilayer of a membrane. May also refer to the state of being buried in the bilayer with no exposure outside the bilayer. When used to describe a protein, indicates that all or part of the peptide sequence is embedded in the membrane.

GO:0007165. The cascade of processes by which a signal interacts with a receptor, causing a change in the level or activity of a second messenger or other downstream target, and ultimately effecting a change in the functioning of the cell.

GO:0031226. Located in the plasma membrane such that some covalently attached portion of the gene product, for example part of a peptide sequence or some other covalently attached moiety such as a GPI anchor, spans or is embedded in one or both leaflets of the membrane.

GO:0005887. Penetrating at least one phospholipid bilayer of a plasma membrane. May also refer to the state of being buried in the bilayer with no exposure outside the bilayer.

GO:0051234. The directed movement of a cell, substance or cellular entity, such as a protein complex or organelle, to a specific location.

GO:0005737. All of the contents of a cell excluding the plasma membrane and nucleus, but including other subcellular structures.

GO:0007275. The biological process whose specific outcome is the progression of an organism over time from an initial condition (e.g. a zygote or a young adult) to a later condition (e.g. a multicellular animal or an aged adult).

GO:0007267. Any process that mediates the transfer of information from one cell to another.

GO:0005576. The space external to the outermost structure of a cell. For cells without external protective or external encapsulating structures this refers to space outside of the plasma membrane. This term covers the host cell environment outside an intracellular parasite.

GO:0004872. Combining with an extracellular or intracellular messenger to initiate a change in cell activity.

GO:0009605. A change in state or activity of a cell or an organism (in terms of movement, secretion, enzyme production, gene expression, etc.) as a result of an external stimulus.

GO:0048856. The biological process whose specific outcome is the progression of an anatomical structure from an initial condition to its mature state. An anatomical structure is any biological entity that occupies space and is distinguished from its surroundings. Anatomical structures can be macroscopic such as a carpel, or microscopic such as an acrosome.

GO:0006810. The directed movement of substances (such as macromolecules, small molecules, ions) into, out of, within or between cells.

GO:0006950. A change in state or activity of a cell or an organism (in terms of movement, secretion, enzyme production, gene expression, etc.) as a result of a stimulus indicating the organism is under stress. The stress is usually, but not necessarily, exogenous (e.g. temperature, humidity, ionizing radiation).

GO:0048731. The process whose specific outcome is the progression of an organismal system over time, from its formation to the mature structure. A system is a regularly interacting or interdependent group of organs or tissues that work together to carry out a given biological process.

se to Sertoli cell-specific *Arid4b* knockout in testes

| # Genes | p-value  | FDR      | q-value |
|---------|----------|----------|---------|
| 43      | 1.78E-28 | 8.88E-27 |         |
| 34      | 2.25E-19 | 5.61E-18 |         |
| 30      | 2.01E-18 | 3.35E-17 |         |
| 32      | 1.63E-17 | 2.03E-16 |         |
| 28      | 5.40E-14 | 5.40E-13 |         |
| 25      | 1.54E-11 | 9.61E-11 |         |
| 25      | 1.54E-11 | 9.61E-11 |         |
| 25      | 1.54E-11 | 9.61E-11 |         |
| 24      | 9.25E-11 | 4.63E-10 |         |
| 24      | 9.25E-11 | 4.63E-10 |         |
| 144     | 2.18E-58 | 1.03E-54 |         |
| 144     | 3.04E-54 | 7.18E-51 |         |
| 125     | 9.75E-50 | 1.54E-46 |         |
| 118     | 2.15E-42 | 2.54E-39 |         |
| 104     | 2.11E-35 | 1.99E-32 |         |
| 104     | 1.52E-34 | 1.20E-31 |         |
| 102     | 2.27E-34 | 1.54E-31 |         |
| 131     | 5.26E-32 | 3.11E-29 |         |
| 82      | 6.96E-32 | 3.65E-29 |         |
| 63      | 3.46E-30 | 1.63E-27 |         |
| 153     | 5.66E-38 | 8.23E-35 |         |
| 124     | 5.96E-36 | 4.33E-33 |         |
| 131     | 2.09E-33 | 1.01E-30 |         |
| 105     | 5.29E-32 | 1.66E-29 |         |
| 114     | 5.72E-32 | 1.66E-29 |         |

|     |          |          |
|-----|----------|----------|
| 112 | 2.99E-31 | 7.25E-29 |
| 125 | 7.73E-31 | 1.60E-28 |
| 93  | 1.56E-29 | 2.83E-27 |
| 91  | 1.13E-28 | 1.83E-26 |
| 72  | 5.91E-20 | 8.59E-18 |
| 122 | 2.62E-19 | 3.46E-17 |
| 78  | 8.71E-19 | 1.06E-16 |
| 46  | 2.02E-18 | 2.26E-16 |
| 48  | 4.04E-18 | 4.20E-16 |
| 55  | 5.24E-18 | 4.78E-16 |
| 40  | 5.26E-18 | 4.78E-16 |
| 74  | 1.84E-17 | 1.58E-15 |
| 63  | 1.07E-16 | 8.60E-15 |
| 48  | 6.56E-16 | 5.02E-14 |
| 63  | 4.48E-15 | 3.26E-13 |

**Supporting Information Table S3.** ARID4B-binding target genes by ChIP-Seq analysis with the a

| Gene ID         | Gene Name     | some | Gene Start | Gene End   | Gene Length | Gen Interva |
|-----------------|---------------|------|------------|------------|-------------|-------------|
| GeneID:497097   | Xkr4          | 1    | 3,214,482  | 3,671,498  | 457,016 -   | 1           |
| GeneID:10003843 | Gm10568       | 1    | 3,680,155  | 3,681,788  | 1,633 +     | 1           |
| GeneID:27395    | Mrpl15        | 1    | 4,773,198  | 4,785,726  | 12,528 -    | 1           |
| GeneID:108664   | Atp6v1h       | 1    | 5,083,173  | 5,162,549  | 79,376 +    | 1           |
| GeneID:226304   | Npbwr1        | 1    | 5,913,707  | 5,917,398  | 3,691 -     | 1           |
| GeneID:12421    | Rb1cc1        | 1    | 6,214,662  | 6,276,104  | 61,442 +    | 1           |
| GeneID:59014    | Rrs1          | 1    | 9,545,408  | 9,547,455  | 2,047 +     | 1           |
| GeneID:76187    | Adhfe1        | 1    | 9,548,046  | 9,577,968  | 29,922 +    | 1           |
| GeneID:17864    | Mybl1         | 1    | 9,668,831  | 9,700,209  | 31,378 -    | 1           |
| GeneID:70675    | Vcpip1        | 1    | 9,723,192  | 9,748,382  | 25,190 -    | 1           |
| GeneID:73331    | 1700034P13Rik | 1    | 9,747,648  | 9,771,256  | 23,608 +    | 1           |
| GeneID:240697   | Mcm dc2       | 1    | 9,908,638  | 9,940,954  | 32,316 +    | 1           |
| GeneID:73824    | Snhg6         | 1    | 9,942,025  | 9,944,118  | 2,093 -     | 1           |
| GeneID:266793   | Snord87       | 1    | 9,942,470  | 9,942,543  | 73 -        | 1           |
| GeneID:10003839 | Gm10567       | 1    | 9,960,164  | 9,962,809  | 2,645 -     | 1           |
| GeneID:10003959 | Tcf24         | 1    | 9,963,408  | 9,967,485  | 4,077 -     | 1           |
| GeneID:69312    | Ppp1r42       | 1    | 9,968,624  | 10,009,130 | 40,506 -    | 1           |
| GeneID:26754    | Cops5         | 1    | 10,024,830 | 10,037,898 | 13,068 -    | 1           |
| GeneID:211660   | Cspp1         | 1    | 10,038,218 | 10,136,768 | 98,550 +    | 1           |
| GeneID:211673   | Arfgef1       | 1    | 10,137,507 | 10,232,670 | 95,163 -    | 1           |
| GeneID:109294   | Prex2         | 1    | 10,993,465 | 11,303,682 | 310,217 +   | 1           |
| GeneID:17978    | Ncoa2         | 1    | 13,139,159 | 13,374,083 | 234,924 -   | 2           |
| GeneID:14048    | Eya1          | 1    | 14,168,958 | 14,310,199 | 141,241 -   | 1           |
| GeneID:226866   | Sbspon        | 1    | 15,853,862 | 15,892,722 | 38,860 -    | 1           |
| GeneID:19989    | Rpl7          | 1    | 16,101,295 | 16,104,433 | 3,138 -     | 1           |
| GeneID:98711    | Rdh10         | 1    | 16,105,882 | 16,132,550 | 26,668 +    | 1           |
| GeneID:66799    | Ube2w         | 1    | 16,540,788 | 16,619,338 | 78,550 -    | 1           |
| GeneID:57339    | Jph1          | 1    | 16,994,938 | 17,097,889 | 102,951 -   | 1           |
| GeneID:17215    | Mcm3          | 1    | 20,803,014 | 20,820,213 | 17,199 -    | 1           |
| GeneID:170829   | Tram2         | 1    | 21,001,397 | 21,079,225 | 77,828 -    | 1           |
| GeneID:280645   | B3gat2        | 1    | 23,761,926 | 23,847,865 | 85,939 +    | 1           |
| GeneID:68187    | Fam135a       | 1    | 24,010,758 | 24,100,341 | 89,583 -    | 1           |
| GeneID:12823    | Col19a1       | 1    | 24,257,683 | 24,587,437 | 329,754 -   | 1           |
| GeneID:19243    | Ptp4a1        | 1    | 30,940,303 | 30,949,755 | 9,452 -     | 1           |
| GeneID:19076    | Prim2         | 1    | 33,453,811 | 33,669,758 | 215,947 -   | 1           |
| GeneID:67503    | 1700001G17Rik | 1    | 33,669,824 | 33,670,712 | 888 +       | 1           |
| GeneID:213539   | Bag2          | 1    | 33,745,484 | 33,757,750 | 12,266 -    | 1           |
| GeneID:98403    | Zfp451        | 1    | 33,761,753 | 33,814,427 | 52,674 -    | 2           |
| GeneID:226970   | Arhgef4       | 1    | 34,801,722 | 34,812,754 | 11,032 +    | 1           |
| GeneID:50785    | Hs6st1        | 1    | 36,068,400 | 36,106,446 | 38,046 +    | 2           |
| GeneID:214855   | Arid5a        | 1    | 36,307,733 | 36,324,029 | 16,296 +    | 1           |
| GeneID:226976   | Kansl3        | 1    | 36,335,730 | 36,369,181 | 33,451 -    | 1           |
| GeneID:94220    | Cnm4          | 1    | 36,471,597 | 36,508,776 | 37,179 +    | 2           |

|               |               |   |            |            |           |   |
|---------------|---------------|---|------------|------------|-----------|---|
| GenelD:94218  | Cnm3          | 1 | 36,511,876 | 36,528,237 | 16,361 +  | 2 |
| GenelD:109346 | Ankrd39       | 1 | 36,538,173 | 36,547,201 | 9,028 -   | 2 |
| GenelD:20353  | Sema4c        | 1 | 36,548,642 | 36,558,381 | 9,739 -   | 2 |
| GenelD:381337 | Fam178b       | 1 | 36,562,696 | 36,683,183 | 120,487 - | 3 |
| GenelD:12859  | Cox5b         | 1 | 36,691,487 | 36,693,388 | 1,901 +   | 1 |
| GenelD:226977 | Actr1b        | 1 | 36,699,202 | 36,709,925 | 10,723 -  | 1 |
| GenelD:56030  | Tmem131       | 1 | 36,792,189 | 36,939,527 | 147,338 - | 1 |
| GenelD:269180 | Inpp4a        | 1 | 37,299,893 | 37,410,736 | 110,843 + | 1 |
| GenelD:76178  | Coa5          | 1 | 37,417,085 | 37,430,103 | 13,018 -  | 1 |
| GenelD:67387  | Unc50         | 1 | 37,430,172 | 37,439,124 | 8,952 +   | 1 |
| GenelD:269181 | Mgat4a        | 1 | 37,439,340 | 37,536,259 | 96,919 -  | 1 |
| GenelD:98258  | Txndc9        | 1 | 37,983,867 | 37,997,208 | 13,341 -  | 1 |
| GenelD:226982 | Eif5b         | 1 | 37,998,010 | 38,055,579 | 57,569 +  | 1 |
| GenelD:56210  | Rev1          | 1 | 38,052,786 | 38,129,662 | 76,876 -  | 1 |
| GenelD:16764  | Aff3          | 1 | 38,177,327 | 38,664,955 | 487,628 - | 1 |
| GenelD:68833  | Pdcl3         | 1 | 38,987,814 | 38,997,236 | 9,422 +   | 1 |
| GenelD:18143  | Npas2         | 1 | 39,194,272 | 39,363,240 | 168,968 + | 1 |
| GenelD:114641 | Rpl31         | 1 | 39,367,851 | 39,371,911 | 4,060 +   | 1 |
| GenelD:54610  | Tbc1d8        | 1 | 39,371,495 | 39,478,747 | 107,252 - | 2 |
| GenelD:26921  | Map4k4        | 1 | 39,900,913 | 40,026,310 | 125,397 + | 1 |
| GenelD:69527  | Mrps9         | 1 | 42,851,233 | 42,905,683 | 54,450 +  | 1 |
| GenelD:14200  | Fhl2          | 1 | 43,123,074 | 43,163,961 | 40,887 -  | 1 |
| GenelD:17974  | Nck2          | 1 | 43,445,751 | 43,570,518 | 124,767 + | 1 |
| GenelD:75623  | Tex30         | 1 | 44,086,617 | 44,102,388 | 15,771 -  | 1 |
| GenelD:72050  | Kdelc1        | 1 | 44,106,546 | 44,118,773 | 12,227 -  | 1 |
| GenelD:246229 | Bivm          | 1 | 44,119,968 | 44,144,771 | 24,803 +  | 1 |
| GenelD:22592  | Ercc5         | 1 | 44,147,744 | 44,181,260 | 33,516 +  | 1 |
| GenelD:17912  | Myo1b         | 1 | 51,749,765 | 51,915,974 | 166,209 - | 1 |
| GenelD:14660  | Gls           | 1 | 52,163,449 | 52,233,232 | 69,783 -  | 1 |
| GenelD:227094 | Tmem194b      | 1 | 52,630,705 | 52,651,919 | 21,214 +  | 1 |
| GenelD:98267  | Stk17b        | 1 | 53,755,512 | 53,785,215 | 29,703 -  | 1 |
| GenelD:329154 | Ankrd44       | 1 | 54,645,340 | 54,926,387 | 281,047 - | 1 |
| GenelD:81898  | Sf3b1         | 1 | 54,985,169 | 55,027,478 | 42,309 -  | 1 |
| GenelD:67876  | Coq10b        | 1 | 55,052,770 | 55,072,702 | 19,932 +  | 1 |
| GenelD:15510  | Hspd1         | 1 | 55,077,834 | 55,087,932 | 10,098 -  | 1 |
| GenelD:15528  | Hspe1         | 1 | 55,088,148 | 55,091,317 | 3,169 +   | 1 |
| GenelD:19070  | Mob4          | 1 | 55,131,245 | 55,154,899 | 23,654 +  | 1 |
| GenelD:628004 | Gm10561       | 1 | 55,226,298 | 55,235,106 | 8,808 +   | 1 |
| GenelD:212679 | Mars2         | 1 | 55,237,177 | 55,240,058 | 2,881 +   | 1 |
| GenelD:227120 | Plcl1         | 1 | 55,405,946 | 55,754,285 | 348,339 + | 1 |
| GenelD:212712 | Satb2         | 1 | 56,793,981 | 56,971,334 | 177,353 - | 1 |
| GenelD:329160 | 9130024F11Rik | 1 | 56,971,469 | 56,975,196 | 3,727 +   | 1 |
| GenelD:75323  | 4930558J18Rik | 1 | 57,359,222 | 57,377,544 | 18,322 -  | 1 |
| GenelD:73467  | 1700066M21Rik | 1 | 57,377,620 | 57,385,423 | 7,803 +   | 1 |
| GenelD:68736  | Tyw5          | 1 | 57,388,244 | 57,406,674 | 18,430 -  | 2 |
| GenelD:68115  | 9430016H08Rik | 1 | 57,406,548 | 57,415,958 | 9,410 +   | 1 |
| GenelD:67198  | Spats2l       | 1 | 57,774,861 | 57,948,397 | 173,536 + | 1 |

|                 |               |   |            |            |             |   |
|-----------------|---------------|---|------------|------------|-------------|---|
| GenelD:51960    | Kctd18        | 1 | 57,955,101 | 57,970,084 | 14,983 -    | 1 |
| GenelD:68549    | Sgol2         | 1 | 57,985,340 | 58,026,277 | 40,937 +    | 1 |
| GenelD:628262   | Gm6860        | 1 | 58,388,767 | 58,388,990 | 223 -       | 1 |
| GenelD:66882    | Bzw1          | 1 | 58,393,136 | 58,406,548 | 13,412 +    | 1 |
| GenelD:12747    | Clk1          | 1 | 58,411,988 | 58,424,088 | 12,100 -    | 1 |
| GenelD:70225    | Ppil3         | 1 | 58,430,993 | 58,445,486 | 14,493 -    | 1 |
| GenelD:18393    | Orc2          | 1 | 58,462,771 | 58,504,919 | 42,148 -    | 1 |
| GenelD:10050445 | Gm15834       | 1 | 58,505,148 | 58,512,616 | 7,468 +     | 1 |
| GenelD:12633    | Cflar         | 1 | 58,713,286 | 58,758,884 | 45,598 +    | 1 |
| GenelD:70827    | Trak2         | 1 | 58,900,450 | 58,973,482 | 73,032 -    | 1 |
| GenelD:227154   | Stradb        | 1 | 58,973,571 | 58,995,122 | 21,551 +    | 1 |
| GenelD:74018    | Als2          | 1 | 59,162,756 | 59,237,231 | 74,475 -    | 1 |
| GenelD:14369    | Fzd7          | 1 | 59,482,147 | 59,486,955 | 4,808 +     | 1 |
| GenelD:22218    | Sumo1         | 1 | 59,639,434 | 59,670,834 | 31,400 -    | 1 |
| GenelD:55989    | Nop58         | 1 | 59,685,006 | 59,711,510 | 26,504 +    | 1 |
| GenelD:10021745 | Snord70       | 1 | 59,691,958 | 59,692,010 | 52 +        | 1 |
| GenelD:12168    | Bmpr2         | 1 | 59,764,637 | 59,870,859 | 106,222 +   | 1 |
| GenelD:72750    | Fam117b       | 1 | 59,913,006 | 59,985,346 | 72,340 +    | 1 |
| GenelD:77300    | Raph1         | 1 | 60,483,185 | 60,566,765 | 83,580 -    | 1 |
| GenelD:72823    | Pard3b        | 1 | 61,638,824 | 62,642,284 | 1,003,460 + | 1 |
| GenelD:18187    | Nrp2          | 1 | 62,703,317 | 62,818,692 | 115,375 +   | 2 |
| GenelD:227197   | Ndufs1        | 1 | 63,143,592 | 63,176,822 | 33,230 -    | 1 |
| GenelD:55949    | Eef1b2        | 1 | 63,176,831 | 63,180,486 | 3,655 +     | 1 |
| GenelD:10021746 | Snora41       | 1 | 63,179,023 | 63,179,135 | 112 +       | 1 |
| GenelD:241070   | Gpr1          | 1 | 63,182,691 | 63,214,209 | 31,518 -    | 1 |
| GenelD:73884    | Zdbf2         | 1 | 63,273,269 | 63,314,575 | 41,306 +    | 1 |
| GenelD:93691    | Klf7          | 1 | 64,035,663 | 64,121,389 | 85,726 -    | 1 |
| GenelD:12912    | Creb1         | 1 | 64,532,804 | 64,604,548 | 71,744 +    | 1 |
| GenelD:67099    | Mettl21a      | 1 | 64,606,480 | 64,617,168 | 10,688 -    | 1 |
| GenelD:69941    | 2810408I11Rik | 1 | 64,679,869 | 64,690,659 | 10,790 -    | 1 |
| GenelD:227210   | Ccnyl1        | 1 | 64,691,345 | 64,725,644 | 34,299 +    | 2 |
| GenelD:14367    | Fzd5          | 1 | 64,730,558 | 64,737,750 | 7,192 -     | 1 |
| GenelD:15926    | ldh1          | 1 | 65,158,616 | 65,186,479 | 27,863 -    | 2 |
| GenelD:18711    | Pikfyve       | 1 | 65,186,685 | 65,278,696 | 92,011 +    | 2 |
| GenelD:12021    | Bard1         | 1 | 71,027,535 | 71,102,972 | 75,437 -    | 1 |
| GenelD:108147   | Atic          | 1 | 71,557,156 | 71,579,403 | 22,247 +    | 1 |
| GenelD:14268    | Fn1           | 1 | 71,585,523 | 71,653,171 | 67,648 -    | 1 |
| GenelD:10004281 | Apol7d        | 1 | 71,653,335 | 71,662,843 | 9,508 +     | 1 |
| GenelD:19981    | Rpl37a        | 1 | 72,711,260 | 72,713,813 | 2,553 +     | 1 |
| GenelD:16008    | Igfbp2        | 1 | 72,824,480 | 72,852,474 | 27,994 +    | 1 |
| GenelD:16011    | Igfbp5        | 1 | 72,858,065 | 72,874,865 | 16,800 -    | 1 |
| GenelD:21961    | Tns1          | 1 | 73,910,231 | 74,124,447 | 214,216 -   | 2 |
| GenelD:435626   | Rufy4         | 1 | 74,125,541 | 74,148,230 | 22,689 +    | 1 |
| GenelD:76709    | Arpc2         | 1 | 74,236,550 | 74,268,213 | 31,663 +    | 1 |
| GenelD:56695    | Pnkd          | 1 | 74,285,034 | 74,353,692 | 68,658 +    | 1 |
| GenelD:69660    | Tmbim1        | 1 | 74,288,247 | 74,304,336 | 16,089 -    | 1 |
| GenelD:10105581 | LOC101055811  | 1 | 74,295,592 | 74,297,905 | 2,313 +     | 1 |



|                 |               |   |            |            |           |   |
|-----------------|---------------|---|------------|------------|-----------|---|
| GenelD:18173    | Slc11a1       | 1 | 74,375,203 | 74,386,051 | 10,848 +  | 2 |
| GenelD:227292   | Ctdsp1        | 1 | 74,391,609 | 74,397,285 | 5,676 +   | 2 |
| GenelD:387219   | Mir26b        | 1 | 74,394,310 | 74,394,394 | 84 +      | 2 |
| GenelD:319651   | Usp37         | 1 | 74,435,510 | 74,544,286 | 108,776 - | 1 |
| GenelD:58184    | Rqcd1         | 1 | 74,506,060 | 74,530,842 | 24,782 +  | 1 |
| GenelD:66821    | Bcs1l         | 1 | 74,588,361 | 74,592,443 | 4,082 +   | 1 |
| GenelD:57751    | Rnf25         | 1 | 74,593,752 | 74,601,397 | 7,645 -   | 1 |
| GenelD:269209   | Stk36         | 1 | 74,601,455 | 74,636,894 | 35,439 +  | 1 |
| GenelD:104086   | Cyp27a1       | 1 | 74,713,574 | 74,737,890 | 24,316 +  | 1 |
| GenelD:16147    | lhh           | 1 | 74,945,318 | 74,951,651 | 6,333 -   | 1 |
| GenelD:22626    | Slc23a3       | 1 | 75,125,541 | 75,133,890 | 8,349 -   | 1 |
| GenelD:69171    | Cnppd1        | 1 | 75,135,215 | 75,142,368 | 7,153 -   | 1 |
| GenelD:227298   | Fam134a       | 1 | 75,142,786 | 75,147,909 | 5,123 +   | 1 |
| GenelD:68818    | Zfand2b       | 1 | 75,168,646 | 75,171,626 | 2,980 +   | 1 |
| GenelD:74104    | Abcb6         | 1 | 75,171,640 | 75,180,283 | 8,643 -   | 1 |
| GenelD:245860   | Atg9a         | 1 | 75,180,866 | 75,191,923 | 11,057 -  | 1 |
| GenelD:74577    | Glb1l         | 1 | 75,198,235 | 75,210,778 | 12,543 -  | 1 |
| GenelD:20872    | Stk16         | 1 | 75,210,829 | 75,215,606 | 4,777 +   | 1 |
| GenelD:22145    | Tuba4a        | 1 | 75,214,974 | 75,219,253 | 4,279 -   | 1 |
| GenelD:381272   | A630095N17Rik | 1 | 75,220,095 | 75,232,093 | 11,998 -  | 2 |
| GenelD:56812    | Dnajb2        | 1 | 75,236,423 | 75,245,692 | 9,269 +   | 1 |
| GenelD:19275    | Ptpn          | 1 | 75,247,041 | 75,264,208 | 17,167 -  | 1 |
| GenelD:13346    | Des           | 1 | 75,360,344 | 75,367,716 | 7,372 +   | 1 |
| GenelD:10050324 | Gm15179       | 1 | 75,368,210 | 75,375,015 | 6,805 -   | 2 |
| GenelD:11790    | Speg          | 1 | 75,375,297 | 75,432,314 | 57,017 +  | 1 |
| GenelD:241118   | Asic4         | 1 | 75,450,510 | 75,474,340 | 23,830 +  | 3 |
| GenelD:74241    | Chpf          | 1 | 75,474,569 | 75,479,471 | 4,902 -   | 3 |
| GenelD:319998   | Tmem198       | 1 | 75,479,532 | 75,485,693 | 6,161 +   | 3 |
| GenelD:98733    | Obsl1         | 1 | 75,485,825 | 75,506,452 | 20,627 -  | 6 |
| GenelD:16322    | Inha          | 1 | 75,507,077 | 75,510,354 | 3,277 +   | 3 |
| GenelD:71728    | Stk11ip       | 1 | 75,521,529 | 75,537,335 | 15,806 +  | 1 |
| GenelD:20536    | Slc4a3        | 1 | 75,546,266 | 75,559,431 | 13,165 +  | 1 |
| GenelD:10003921 | Gm2102        | 1 | 78,216,589 | 78,218,285 | 1,696 -   | 1 |
| GenelD:195434   | Utp14b        | 1 | 78,657,825 | 78,667,601 | 9,776 +   | 1 |
| GenelD:74205    | Acsl3         | 1 | 78,657,825 | 78,707,743 | 49,918 +  | 1 |
| GenelD:252903   | Ap1s3         | 1 | 79,606,876 | 79,671,972 | 65,096 -  | 1 |
| GenelD:69368    | Wdfy1         | 1 | 79,702,262 | 79,761,769 | 59,507 -  | 1 |
| GenelD:10003869 | Gm10555       | 1 | 79,762,717 | 79,764,507 | 1,790 +   | 1 |
| GenelD:69163    | Mrpl44        | 1 | 79,776,018 | 79,781,445 | 5,427 +   | 1 |
| GenelD:20720    | Serpine2      | 1 | 79,794,321 | 79,858,665 | 64,344 -  | 1 |
| GenelD:210293   | Dock10        | 1 | 80,501,073 | 80,758,553 | 257,480 - | 1 |
| GenelD:16367    | Irs1          | 1 | 82,233,105 | 82,291,439 | 58,334 -  | 1 |
| GenelD:10050307 | Gm19537       | 1 | 82,282,210 | 82,285,248 | 3,038 -   | 1 |
| GenelD:15463    | Agfg1         | 1 | 82,839,483 | 82,896,275 | 56,792 +  | 1 |
| GenelD:14897    | Trip12        | 1 | 84,721,189 | 84,839,304 | 118,115 - | 1 |
| GenelD:66153    | Fbxo36        | 1 | 84,839,841 | 84,900,486 | 60,645 +  | 1 |
| GenelD:12283    | Cab39         | 1 | 85,793,447 | 85,851,577 | 58,130 +  | 1 |

|                 |               |   |            |            |           |   |
|-----------------|---------------|---|------------|------------|-----------|---|
| GenelD:72792    | 2810459M11Rik | 1 | 86,045,863 | 86,055,456 | 9,593 +   | 2 |
| GenelD:70247    | Psmc1         | 1 | 86,064,619 | 86,139,295 | 74,676 +  | 1 |
| GenelD:17975    | Ncl           | 1 | 86,344,719 | 86,359,455 | 14,736 -  | 1 |
| GenelD:10030374 | Snora75       | 1 | 86,351,170 | 86,351,285 | 115 -     | 1 |
| GenelD:80828    | Snord82       | 1 | 86,356,260 | 86,356,327 | 67 -      | 1 |
| GenelD:319336   | C130036L24Rik | 1 | 86,359,574 | 86,367,964 | 8,390 +   | 1 |
| GenelD:19231    | Ptma          | 1 | 86,526,736 | 86,530,698 | 3,962 +   | 1 |
| GenelD:18159    | Nppc          | 1 | 86,666,293 | 86,670,573 | 4,280 -   | 1 |
| GenelD:98363    | Efh1          | 1 | 87,264,364 | 87,310,791 | 46,427 +  | 1 |
| GenelD:227331   | Gigyf2        | 1 | 87,326,998 | 87,450,810 | 123,812 + | 1 |
| GenelD:77040    | Atg16l1       | 1 | 87,756,011 | 87,792,428 | 36,417 +  | 1 |
| GenelD:227334   | Usp40         | 1 | 87,945,121 | 88,008,551 | 63,430 -  | 1 |
| GenelD:320982   | Arl4c         | 1 | 88,698,225 | 88,702,191 | 3,966 -   | 1 |
| GenelD:98402    | Sh3bp4        | 1 | 89,070,462 | 89,153,793 | 83,331 +  | 1 |
| GenelD:347722   | Agap1         | 1 | 89,454,811 | 89,895,282 | 440,471 + | 2 |
| GenelD:14472    | Gbx2          | 1 | 89,927,962 | 89,931,176 | 3,214 -   | 1 |
| GenelD:108679   | Cops8         | 1 | 90,603,425 | 90,613,341 | 9,916 +   | 1 |
| GenelD:16978    | Lrrfip1       | 1 | 90,998,727 | 91,128,944 | 130,217 + | 1 |
| GenelD:67921    | Ube2f         | 1 | 91,250,319 | 91,286,025 | 35,706 +  | 1 |
| GenelD:227357   | Espnl         | 1 | 91,322,075 | 91,348,303 | 26,228 +  | 1 |
| GenelD:70788    | Klhl30        | 1 | 91,351,073 | 91,362,404 | 11,331 +  | 2 |
| GenelD:227358   | Fam132b       | 1 | 91,366,430 | 91,374,217 | 7,787 +   | 1 |
| GenelD:67444    | Ilkap         | 1 | 91,375,831 | 91,398,783 | 22,952 -  | 2 |
| GenelD:67086    | 1700020N18Rik | 1 | 91,404,879 | 91,406,029 | 1,150 -   | 2 |
| GenelD:55927    | Hes6          | 1 | 91,411,483 | 91,413,222 | 1,739 -   | 1 |
| GenelD:18627    | Per2          | 1 | 91,415,982 | 91,459,328 | 43,346 -  | 2 |
| GenelD:74019    | Traf3ip1      | 1 | 91,494,668 | 91,529,307 | 34,639 +  | 1 |
| GenelD:13345    | Twist2        | 1 | 91,801,477 | 91,848,027 | 46,550 +  | 1 |
| GenelD:67273    | Ndufa10       | 1 | 92,439,708 | 92,473,758 | 34,050 -  | 1 |
| GenelD:259040   | Olfr1416      | 1 | 92,479,681 | 92,480,619 | 938 -     | 1 |
| GenelD:66915    | Myeov2        | 1 | 92,637,145 | 92,641,985 | 4,840 -   | 1 |
| GenelD:260301   | Otos          | 1 | 92,644,218 | 92,648,841 | 4,623 -   | 1 |
| GenelD:14733    | Gpc1          | 1 | 92,831,686 | 92,860,196 | 28,510 +  | 1 |
| GenelD:241158   | Ankmy1        | 1 | 92,870,129 | 92,902,906 | 32,777 -  | 2 |
| GenelD:67446    | Dusp28        | 1 | 92,906,989 | 92,908,620 | 1,631 +   | 2 |
| GenelD:108657   | Rnpepl1       | 1 | 92,910,825 | 92,920,585 | 9,760 +   | 2 |
| GenelD:381284   | E030010N08Rik | 1 | 93,168,725 | 93,231,072 | 62,347 +  | 2 |
| GenelD:208777   | Sned1         | 1 | 93,235,897 | 93,296,448 | 60,551 +  | 1 |
| GenelD:269224   | Pask          | 1 | 93,309,437 | 93,342,788 | 33,351 -  | 1 |
| GenelD:66385    | Ppp1r7        | 1 | 93,343,645 | 93,367,618 | 23,973 +  | 1 |
| GenelD:110611   | Hdlbp         | 1 | 93,405,940 | 93,478,808 | 72,868 -  | 2 |
| GenelD:18000    | Sept2         | 1 | 93,478,993 | 93,509,733 | 30,740 +  | 1 |
| GenelD:59041    | Stk25         | 1 | 93,620,751 | 93,635,727 | 14,976 -  | 1 |
| GenelD:51800    | Bok           | 1 | 93,685,694 | 93,695,762 | 10,068 +  | 1 |
| GenelD:67026    | Thap4         | 1 | 93,705,391 | 93,754,838 | 49,447 -  | 1 |
| GenelD:66615    | Atg4b         | 1 | 93,755,033 | 93,789,529 | 34,496 +  | 1 |
| GenelD:21915    | Dtymk         | 1 | 93,792,576 | 93,801,934 | 9,358 -   | 2 |

|               |               |   |             |             |           |   |
|---------------|---------------|---|-------------|-------------|-----------|---|
| GenelD:66262  | Ing5          | 1 | 93,803,965  | 93,822,101  | 18,136 +  | 2 |
| GenelD:67698  | Fam174a       | 1 | 95,313,628  | 95,335,284  | 21,656 +  | 1 |
| GenelD:52392  | D1Ertd622e    | 1 | 97,643,902  | 97,662,018  | 18,116 -  | 1 |
| GenelD:27392  | Pign          | 1 | 105,518,422 | 105,663,676 | 145,254 - | 1 |
| GenelD:227446 | 2310035C23Rik | 1 | 105,663,861 | 105,755,131 | 91,270 +  | 1 |
| GenelD:635504 | Gm7160        | 1 | 105,979,350 | 105,990,276 | 10,926 -  | 1 |
| GenelD:227449 | Zcchc2        | 1 | 105,990,406 | 106,034,077 | 43,671 +  | 1 |
| GenelD:626049 | Gm20753       | 1 | 106,152,625 | 106,171,524 | 18,899 -  | 2 |
| GenelD:98432  | Phlpp1        | 1 | 106,171,869 | 106,394,245 | 222,376 + | 2 |
| GenelD:20479  | Vps4b         | 1 | 106,770,788 | 106,796,725 | 25,937 -  | 1 |
| GenelD:319901 | Dsel          | 1 | 111,858,702 | 111,864,918 | 6,216 -   | 1 |
| GenelD:22099  | Tsn           | 1 | 118,298,517 | 118,311,132 | 12,615 -  | 1 |
| GenelD:14633  | Gli2          | 1 | 118,834,061 | 119,053,619 | 219,558 - | 2 |
| GenelD:16324  | Inhbb         | 1 | 119,415,465 | 119,422,248 | 6,783 -   | 3 |
| GenelD:64143  | Ralb          | 1 | 119,470,305 | 119,504,782 | 34,477 -  | 1 |
| GenelD:226351 | Tmem185b      | 1 | 119,526,154 | 119,528,983 | 2,829 +   | 1 |
| GenelD:226352 | Epb4.115      | 1 | 119,545,033 | 119,649,000 | 103,967 - | 1 |
| GenelD:19258  | Ptpn4         | 1 | 119,658,092 | 119,837,071 | 178,979 - | 1 |
| GenelD:66942  | Ddx18         | 1 | 121,553,835 | 121,567,980 | 14,145 -  | 1 |
| GenelD:74117  | Actr3         | 1 | 125,392,905 | 125,435,727 | 42,822 -  | 1 |
| GenelD:74150  | Slc35f5       | 1 | 125,561,016 | 125,595,684 | 34,668 +  | 1 |
| GenelD:72585  | Lypd1         | 1 | 125,872,039 | 125,912,214 | 40,175 -  | 1 |
| GenelD:210356 | Nckap5        | 1 | 125,913,636 | 126,830,632 | 916,996 - | 1 |
| GenelD:107895 | Mgat5         | 1 | 127,204,986 | 127,482,972 | 277,986 + | 1 |
| GenelD:226409 | Zranb3        | 1 | 127,954,186 | 128,102,408 | 148,222 - | 1 |
| GenelD:226412 | R3hdm1        | 1 | 128,103,306 | 128,237,735 | 134,429 + | 2 |
| GenelD:67812  | Ubxn4         | 1 | 128,244,181 | 128,279,377 | 35,196 +  | 1 |
| GenelD:17219  | Mcm6          | 1 | 128,331,591 | 128,359,656 | 28,065 -  | 1 |
| GenelD:226414 | Dars          | 1 | 128,363,707 | 128,417,416 | 53,709 -  | 1 |
| GenelD:18640  | Pfkfb2        | 1 | 130,689,043 | 130,729,253 | 40,210 -  | 1 |
| GenelD:226418 | Yod1          | 1 | 130,717,327 | 130,722,073 | 4,746 +   | 1 |
| GenelD:17164  | Mapkapk2      | 1 | 131,053,704 | 131,097,543 | 43,839 -  | 1 |
| GenelD:226419 | Dyrk3         | 1 | 131,128,441 | 131,138,234 | 9,793 -   | 1 |
| GenelD:54354  | Rassf5        | 1 | 131,176,410 | 131,245,178 | 68,768 -  | 1 |
| GenelD:56489  | Ikbke         | 1 | 131,254,602 | 131,279,563 | 24,961 -  | 1 |
| GenelD:14270  | Srgap2        | 1 | 131,285,251 | 131,527,361 | 242,110 - | 2 |
| GenelD:108900 | Fam72a        | 1 | 131,527,989 | 131,539,872 | 11,883 +  | 2 |
| GenelD:98415  | Nucks1        | 1 | 131,910,458 | 131,936,321 | 25,863 +  | 1 |
| GenelD:13714  | Elk4          | 1 | 132,007,605 | 132,025,684 | 18,079 +  | 1 |
| GenelD:213417 | Klhdc8a       | 1 | 132,298,626 | 132,307,357 | 8,731 +   | 2 |
| GenelD:74137  | Nuak2         | 1 | 132,316,125 | 132,333,488 | 17,363 +  | 1 |
| GenelD:68875  | Tmcc2         | 1 | 132,356,315 | 132,391,281 | 34,966 -  | 1 |
| GenelD:213452 | Dstyk         | 1 | 132,417,453 | 132,466,959 | 49,506 +  | 1 |
| GenelD:16980  | Lrrn2         | 1 | 132,880,355 | 132,940,005 | 59,650 +  | 1 |
| GenelD:240752 | Pik3c2b       | 1 | 133,046,012 | 133,108,688 | 62,676 +  | 1 |
| GenelD:108954 | Ppp1r15b      | 1 | 133,131,166 | 133,139,800 | 8,634 +   | 1 |
| GenelD:68338  | Golt1a        | 1 | 133,309,823 | 133,323,026 | 13,203 +  | 1 |

|                 |               |   |             |             |           |   |
|-----------------|---------------|---|-------------|-------------|-----------|---|
| GenelD:280287   | Kiss1         | 1 | 133,327,212 | 133,329,722 | 2,510 +   | 1 |
| GenelD:19701    | Ren1          | 1 | 133,350,674 | 133,360,320 | 9,646 +   | 1 |
| GenelD:214253   | Etnk2         | 1 | 133,363,572 | 133,380,318 | 16,746 +  | 1 |
| GenelD:20668    | Sox13         | 1 | 133,382,300 | 133,424,212 | 41,912 -  | 1 |
| GenelD:20643    | Snrpe         | 1 | 133,603,871 | 133,610,280 | 6,409 -   | 1 |
| GenelD:70579    | Zc3h11a       | 1 | 133,619,871 | 133,661,380 | 41,509 -  | 1 |
| GenelD:12227    | Btg2          | 1 | 134,074,865 | 134,079,155 | 4,290 -   | 1 |
| GenelD:72017    | Cyb5r1        | 1 | 134,405,990 | 134,411,738 | 5,748 +   | 1 |
| GenelD:72674    | Adipor1       | 1 | 134,415,467 | 134,432,341 | 16,874 +  | 1 |
| GenelD:240756   | Klhl12        | 1 | 134,455,555 | 134,490,873 | 35,318 +  | 2 |
| GenelD:98710    | Rabif         | 1 | 134,494,660 | 134,507,885 | 13,225 +  | 1 |
| GenelD:71001    | 4931440L10Rik | 1 | 134,540,945 | 134,547,022 | 6,077 -   | 1 |
| GenelD:75605    | Kdm5b         | 1 | 134,560,178 | 134,632,878 | 72,700 +  | 2 |
| GenelD:329251   | Ppp1r12b      | 1 | 134,765,943 | 134,955,940 | 189,997 - | 1 |
| GenelD:67196    | Ube2t         | 1 | 134,962,577 | 134,974,137 | 11,560 +  | 1 |
| GenelD:329252   | Lgr6          | 1 | 134,986,353 | 135,105,276 | 118,923 - | 1 |
| GenelD:320139   | Ptpn7         | 1 | 135,132,725 | 135,145,320 | 12,595 +  | 1 |
| GenelD:68724    | Arl8a         | 1 | 135,146,834 | 135,156,268 | 9,434 +   | 1 |
| GenelD:215615   | Rnpep         | 1 | 135,262,699 | 135,284,084 | 21,385 -  | 1 |
| GenelD:93689    | Lmod1         | 1 | 135,324,813 | 135,368,065 | 43,252 +  | 1 |
| GenelD:77552    | Shisa4        | 1 | 135,371,456 | 135,375,063 | 3,607 -   | 1 |
| GenelD:226432   | Ipo9          | 1 | 135,382,315 | 135,430,491 | 48,176 -  | 1 |
| GenelD:215690   | Nav1          | 1 | 135,434,580 | 135,585,355 | 150,775 - | 2 |
| GenelD:215714   | Gm4793        | 1 | 135,584,773 | 135,599,950 | 15,177 +  | 2 |
| GenelD:10105601 | LOC101056010  | 1 | 135,606,447 | 135,688,105 | 81,658 -  | 1 |
| GenelD:27280    | Phlda3        | 1 | 135,766,085 | 135,769,134 | 3,049 +   | 1 |
| GenelD:329253   | Gm15850       | 1 | 136,127,719 | 136,131,183 | 3,464 -   | 1 |
| GenelD:16565    | Kif21b        | 1 | 136,131,401 | 136,178,014 | 46,613 +  | 1 |
| GenelD:67886    | Camsap2       | 1 | 136,268,123 | 136,346,104 | 77,981 -  | 1 |
| GenelD:320054   | 9230116N13Rik | 1 | 136,411,916 | 136,415,519 | 3,603 -   | 1 |
| GenelD:67997    | Ddx59         | 1 | 136,415,271 | 136,440,220 | 24,949 +  | 1 |
| GenelD:381293   | Kif14         | 1 | 136,467,958 | 136,531,511 | 63,553 +  | 1 |
| GenelD:26424    | Nr5a2         | 1 | 136,843,584 | 136,960,448 | 116,864 - | 1 |
| GenelD:59125    | Nek7          | 1 | 138,484,714 | 138,619,696 | 134,982 - | 1 |
| GenelD:16876    | Lhx9          | 1 | 138,825,186 | 138,847,579 | 22,393 -  | 2 |
| GenelD:69549    | 2310009B15Rik | 1 | 138,851,979 | 138,856,854 | 4,875 -   | 1 |
| GenelD:226470   | Zbtb41        | 1 | 139,422,383 | 139,453,007 | 30,624 +  | 2 |
| GenelD:12316    | Aspm          | 1 | 139,454,773 | 139,494,088 | 39,315 +  | 1 |
| GenelD:214498   | Cdc73         | 1 | 143,607,499 | 143,702,684 | 95,185 -  | 1 |
| GenelD:69367    | Glr2          | 1 | 143,739,349 | 143,749,678 | 10,329 +  | 1 |
| GenelD:545370   | Hmnc1         | 1 | 150,562,500 | 150,993,435 | 430,935 - | 1 |
| GenelD:117198   | Ivns1abp      | 1 | 151,344,498 | 151,364,445 | 19,947 +  | 1 |
| GenelD:63913    | Fam129a       | 1 | 151,571,373 | 151,719,347 | 147,974 + | 1 |
| GenelD:66967    | Edem3         | 1 | 151,755,374 | 151,822,328 | 66,954 +  | 1 |
| GenelD:69399    | 1700025G04Rik | 1 | 151,884,524 | 152,090,320 | 205,796 - | 1 |
| GenelD:66637    | Tsen15        | 1 | 152,370,735 | 152,386,682 | 15,947 -  | 1 |
| GenelD:269132   | Colgalt2      | 1 | 152,399,867 | 152,510,695 | 110,828 + | 1 |

|                 |               |   |             |             |           |   |
|-----------------|---------------|---|-------------|-------------|-----------|---|
| GenelD:71281    | Apobec4       | 1 | 152,750,551 | 152,757,544 | 6,993 +   | 1 |
| GenelD:67771    | Arpc5         | 1 | 152,766,542 | 152,775,580 | 9,038 +   | 1 |
| GenelD:226517   | Smg7          | 1 | 152,836,995 | 152,902,646 | 65,651 -  | 2 |
| GenelD:226519   | Lamc1         | 1 | 153,218,922 | 153,332,786 | 113,864 - | 1 |
| GenelD:71836    | Shcbp1l       | 1 | 153,425,209 | 153,452,574 | 27,365 +  | 1 |
| GenelD:13211    | Dhx9          | 1 | 153,455,758 | 153,487,660 | 31,902 -  | 1 |
| GenelD:240819   | Teddm1        | 1 | 153,891,646 | 153,893,060 | 1,414 +   | 1 |
| GenelD:14645    | Glul          | 1 | 153,899,945 | 153,909,714 | 9,769 +   | 1 |
| GenelD:10050335 | Zfp648        | 1 | 154,201,187 | 154,205,674 | 4,487 +   | 1 |
| GenelD:15939    | Ier5          | 1 | 155,096,367 | 155,099,636 | 3,269 -   | 1 |
| GenelD:207792   | BC034090      | 1 | 155,212,471 | 155,242,320 | 29,849 -  | 1 |
| GenelD:19775    | Xpr1          | 1 | 155,275,657 | 155,417,444 | 141,787 - | 1 |
| GenelD:16872    | Lhx4          | 1 | 155,701,692 | 155,742,027 | 40,335 -  | 1 |
| GenelD:104009   | Qsox1         | 1 | 155,778,155 | 155,812,899 | 34,744 -  | 1 |
| GenelD:74081    | Cep350        | 1 | 155,844,964 | 155,973,255 | 128,291 - | 1 |
| GenelD:208263   | Tor1aip1      | 1 | 156,004,599 | 156,036,480 | 31,881 -  | 1 |
| GenelD:240832   | Tor1aip2      | 1 | 156,035,664 | 156,068,861 | 33,197 +  | 1 |
| GenelD:11352    | Abl2          | 1 | 156,558,787 | 156,649,619 | 90,832 +  | 2 |
| GenelD:215015   | Fam20b        | 1 | 156,678,571 | 156,718,910 | 40,339 -  | 1 |
| GenelD:226525   | Rasal2        | 1 | 157,135,183 | 157,412,595 | 277,412 - | 1 |
| GenelD:69953    | 2810025M15Rik | 1 | 157,412,352 | 157,420,236 | 7,884 +   | 1 |
| GenelD:12301    | Cacybp        | 1 | 160,202,367 | 160,212,892 | 10,525 -  | 1 |
| GenelD:29809    | Rabgap1l      | 1 | 160,219,174 | 160,792,938 | 573,764 - | 2 |
| GenelD:381305   | Rc3h1         | 1 | 160,906,411 | 160,974,976 | 68,565 +  | 1 |
| GenelD:240869   | Zbtb37        | 1 | 161,017,756 | 161,034,259 | 16,503 -  | 1 |
| GenelD:14455    | Gas5          | 1 | 161,035,166 | 161,038,537 | 3,371 +   | 1 |
| GenelD:10062858 | Mir5117       | 1 | 161,037,353 | 161,037,443 | 90 +      | 1 |
| GenelD:10021744 | Snord47       | 1 | 161,038,092 | 161,038,156 | 64 +      | 1 |
| GenelD:226539   | Dars2         | 1 | 161,040,613 | 161,070,632 | 30,019 -  | 1 |
| GenelD:53330    | Vamp4         | 1 | 162,570,828 | 162,599,078 | 28,250 +  | 1 |
| GenelD:226562   | Prrc2c        | 1 | 162,671,785 | 162,740,556 | 68,771 -  | 1 |
| GenelD:240880   | Scyl3         | 1 | 163,930,064 | 163,955,126 | 25,062 +  | 1 |
| GenelD:116914   | Slc19a2       | 1 | 164,249,055 | 164,265,369 | 16,314 +  | 1 |
| GenelD:11931    | Atp1b1        | 1 | 164,437,267 | 164,458,355 | 21,088 -  | 1 |
| GenelD:226591   | Tiprl         | 1 | 165,212,286 | 165,236,958 | 24,672 -  | 1 |
| GenelD:68481    | Mpzl1         | 1 | 165,592,181 | 165,634,541 | 42,360 -  | 2 |
| GenelD:226594   | Rcsd1         | 1 | 165,648,945 | 165,708,094 | 59,149 -  | 2 |
| GenelD:18986    | Pou2f1        | 1 | 165,865,154 | 166,002,634 | 137,480 - | 2 |
| GenelD:71592    | Pogk          | 1 | 166,393,610 | 166,409,828 | 16,218 -  | 1 |
| GenelD:80914    | Uck2          | 1 | 167,226,083 | 167,285,127 | 59,044 -  | 1 |
| GenelD:68944    | Tmco1         | 1 | 167,308,670 | 167,333,978 | 25,308 +  | 1 |
| GenelD:107652   | Uap1          | 1 | 170,142,003 | 170,174,946 | 32,943 -  | 1 |
| GenelD:70729    | Nos1ap        | 1 | 170,317,496 | 170,589,849 | 272,353 - | 1 |
| GenelD:226641   | Atf6          | 1 | 170,704,457 | 170,867,771 | 163,314 - | 1 |
| GenelD:80915    | Dusp12        | 1 | 170,874,188 | 170,885,540 | 11,352 -  | 2 |
| GenelD:19044    | Ppox          | 1 | 171,276,992 | 171,281,186 | 4,194 -   | 1 |
| GenelD:30941    | Usp21         | 1 | 171,281,949 | 171,287,961 | 6,012 -   | 1 |

|                 |               |   |             |             |           |   |
|-----------------|---------------|---|-------------|-------------|-----------|---|
| GenelD:66155    | Ufc1          | 1 | 171,288,564 | 171,294,982 | 6,418 -   | 1 |
| GenelD:21945    | Dedd          | 1 | 171,329,145 | 171,342,501 | 13,356 +  | 1 |
| GenelD:27045    | Nit1          | 1 | 171,342,237 | 171,345,645 | 3,408 -   | 1 |
| GenelD:18637    | Pfdn2         | 1 | 171,345,699 | 171,358,170 | 12,471 +  | 1 |
| GenelD:226652   | Arhgap30      | 1 | 171,388,960 | 171,410,240 | 21,280 +  | 1 |
| GenelD:22278    | Usf1          | 1 | 171,411,681 | 171,418,743 | 7,062 +   | 1 |
| GenelD:226654   | Tstd1         | 1 | 171,419,033 | 171,420,352 | 1,319 +   | 1 |
| GenelD:56009    | Alyref2       | 1 | 171,503,478 | 171,504,750 | 1,272 +   | 1 |
| GenelD:93840    | Vangl2        | 1 | 172,004,371 | 172,027,268 | 22,897 -  | 1 |
| GenelD:59287    | Ncstn         | 1 | 172,066,013 | 172,082,749 | 16,736 -  | 1 |
| GenelD:12847    | Copa          | 1 | 172,082,529 | 172,122,332 | 39,803 +  | 1 |
| GenelD:98193    | Dcaf8         | 1 | 172,148,015 | 172,196,393 | 48,378 +  | 1 |
| GenelD:140559   | Igsf8         | 1 | 172,312,407 | 172,319,837 | 7,430 +   | 2 |
| GenelD:16524    | Kcnj9         | 1 | 172,321,033 | 172,329,263 | 8,230 -   | 2 |
| GenelD:16513    | Kcnj10        | 1 | 172,341,210 | 172,374,085 | 32,875 +  | 1 |
| GenelD:67556    | Pigm          | 1 | 172,376,531 | 172,384,099 | 7,568 +   | 1 |
| GenelD:93842    | Igsf9         | 1 | 172,482,213 | 172,498,877 | 16,664 +  | 1 |
| GenelD:21346    | Tagln2        | 1 | 172,500,246 | 172,507,375 | 7,129 +   | 1 |
| GenelD:240916   | Vsig8         | 1 | 172,555,938 | 172,563,717 | 7,779 +   | 1 |
| GenelD:68440    | Dusp23        | 1 | 172,630,769 | 172,632,974 | 2,205 -   | 1 |
| GenelD:24012    | Rgs7          | 1 | 175,059,076 | 175,492,545 | 433,469 - | 1 |
| GenelD:13603    | Opn3          | 1 | 175,662,427 | 175,692,590 | 30,163 -  | 1 |
| GenelD:12663    | Chml          | 1 | 175,682,237 | 175,688,353 | 6,116 -   | 1 |
| GenelD:75820    | Wdr64         | 1 | 175,698,593 | 175,815,734 | 117,141 + | 1 |
| GenelD:26909    | Exo1          | 1 | 175,880,778 | 175,911,396 | 30,618 +  | 1 |
| GenelD:23797    | Akt3          | 1 | 177,022,115 | 177,248,767 | 226,652 - | 1 |
| GenelD:11566    | Adss          | 1 | 177,763,178 | 177,796,509 | 33,331 -  | 1 |
| GenelD:320110   | B230369F24Rik | 1 | 178,315,033 | 178,315,459 | 426 -     | 1 |
| GenelD:66359    | Cox20         | 1 | 178,319,153 | 178,322,693 | 3,540 +   | 1 |
| GenelD:51810    | Hnrnpu        | 1 | 178,328,300 | 178,337,784 | 9,484 -   | 2 |
| GenelD:68226    | Efcab2        | 1 | 178,405,881 | 178,483,250 | 77,369 +  | 1 |
| GenelD:269152   | Kif26b        | 1 | 178,529,125 | 178,932,857 | 403,732 + | 2 |
| GenelD:15278    | Tfb2m         | 1 | 179,528,056 | 179,546,267 | 18,211 -  | 1 |
| GenelD:226744   | Cnst          | 1 | 179,546,529 | 179,627,473 | 80,944 +  | 1 |
| GenelD:109232   | Sccpdh        | 1 | 179,668,231 | 179,687,184 | 18,953 +  | 1 |
| GenelD:226747   | Ahctf1        | 1 | 179,744,904 | 179,804,015 | 59,111 -  | 1 |
| GenelD:19165    | Psen2         | 1 | 180,227,004 | 180,256,300 | 29,296 -  | 1 |
| GenelD:320404   | Itpkb         | 1 | 180,330,476 | 180,423,659 | 93,183 +  | 2 |
| GenelD:381310   | 6330403A02Rik | 1 | 180,432,373 | 180,483,504 | 51,131 -  | 1 |
| GenelD:11545    | Parp1         | 1 | 180,568,975 | 180,601,254 | 32,279 +  | 1 |
| GenelD:72568    | Lin9          | 1 | 180,641,334 | 180,690,687 | 49,353 +  | 3 |
| GenelD:27217    | Mixl1         | 1 | 180,693,043 | 180,697,034 | 3,991 -   | 1 |
| GenelD:170760   | Acbd3         | 1 | 180,726,043 | 180,754,204 | 28,161 +  | 1 |
| GenelD:15078    | H3f3a         | 1 | 180,802,568 | 180,813,603 | 11,035 -  | 1 |
| GenelD:10105593 | LOC101055935  | 1 | 180,803,510 | 180,808,760 | 5,250 -   | 1 |
| GenelD:320202   | Lefty2        | 1 | 180,893,119 | 180,899,103 | 5,984 +   | 1 |
| GenelD:69051    | Pycr2         | 1 | 180,904,274 | 180,908,088 | 3,814 +   | 1 |

|                 |               |    |             |             |           |   |
|-----------------|---------------|----|-------------|-------------|-----------|---|
| GenelD:13590    | Lefty1        | 1  | 180,935,039 | 180,938,401 | 3,362 +   | 1 |
| GenelD:208795   | Tmem63a       | 1  | 180,942,518 | 180,975,104 | 32,586 +  | 1 |
| GenelD:226757   | Wdr26         | 1  | 181,173,226 | 181,211,978 | 38,752 -  | 2 |
| GenelD:98386    | Lbr           | 1  | 181,815,315 | 181,842,401 | 27,086 -  | 1 |
| GenelD:433384   | Gm5533        | 1  | 181,851,574 | 181,853,189 | 1,615 -   | 1 |
| GenelD:27058    | Srp9          | 1  | 182,124,737 | 182,132,415 | 7,678 +   | 1 |
| GenelD:209456   | Trp53bp2      | 1  | 182,409,167 | 182,462,436 | 53,269 +  | 1 |
| GenelD:12334    | Capn2         | 1  | 182,467,259 | 182,517,483 | 50,224 -  | 1 |
| GenelD:71678    | Brox          | 1  | 183,276,342 | 183,297,008 | 20,666 -  | 1 |
| GenelD:108909   | Aida          | 1  | 183,297,060 | 183,324,501 | 27,441 +  | 1 |
| GenelD:338366   | Mia3          | 1  | 183,326,236 | 183,369,565 | 43,329 -  | 2 |
| GenelD:381314   | Iars2         | 1  | 185,286,662 | 185,329,401 | 42,739 -  | 1 |
| GenelD:23827    | Bpnt1         | 1  | 185,332,159 | 185,357,769 | 25,610 +  | 2 |
| GenelD:107508   | Eprs          | 1  | 185,363,095 | 185,428,355 | 65,260 +  | 1 |
| GenelD:21808    | Tgfb2         | 1  | 186,623,186 | 186,705,992 | 82,806 -  | 1 |
| GenelD:226823   | Kctd3         | 1  | 188,971,098 | 189,007,840 | 36,742 -  | 1 |
| GenelD:16526    | Kcnk2         | 1  | 189,207,930 | 189,344,192 | 136,262 - | 1 |
| GenelD:319980   | A430027H14Rik | 1  | 189,343,437 | 189,344,897 | 1,460 +   | 1 |
| GenelD:108000   | Cenpf         | 1  | 189,640,606 | 189,688,086 | 47,480 -  | 1 |
| GenelD:19250    | Ptpn14        | 1  | 189,728,268 | 189,876,695 | 148,427 + | 1 |
| GenelD:226830   | Smyd2         | 1  | 189,880,492 | 189,922,288 | 41,796 -  | 1 |
| GenelD:19130    | Prox1         | 1  | 190,121,775 | 190,170,680 | 48,905 -  | 2 |
| GenelD:320119   | Rps6kc1       | 1  | 190,772,879 | 190,911,770 | 138,891 - | 1 |
| GenelD:226841   | Vash2         | 1  | 190,947,646 | 190,979,296 | 31,650 -  | 1 |
| GenelD:381319   | Batf3         | 1  | 191,098,414 | 191,108,943 | 10,529 +  | 1 |
| GenelD:10050436 | D730003I15Rik | 1  | 191,224,474 | 191,225,687 | 1,213 +   | 1 |
| GenelD:66208    | Nenf          | 1  | 191,306,797 | 191,318,118 | 11,321 -  | 2 |
| GenelD:66950    | Tmem206       | 1  | 191,325,965 | 191,352,925 | 26,960 +  | 2 |
| GenelD:226849   | Ppp2r5a       | 1  | 191,351,981 | 191,397,041 | 45,060 -  | 1 |
| GenelD:10050437 | Gm20201       | 1  | 191,398,660 | 191,403,272 | 4,612 -   | 1 |
| GenelD:76843    | Dtl           | 1  | 191,537,365 | 191,575,534 | 38,169 -  | 1 |
| GenelD:77065    | Ints7         | 1  | 191,575,734 | 191,621,691 | 45,957 +  | 1 |
| GenelD:226856   | Lpgat1        | 1  | 191,718,024 | 191,784,255 | 66,231 +  | 1 |
| GenelD:18005    | Nek2          | 1  | 191,821,473 | 191,833,049 | 11,576 +  | 1 |
| GenelD:98736    | 1700034H15Rik | 1  | 191,894,072 | 191,907,527 | 13,455 -  | 1 |
| GenelD:22782    | Slc30a1       | 1  | 191,906,781 | 191,913,247 | 6,466 +   | 1 |
| GenelD:214742   | Rcor3         | 1  | 192,100,459 | 192,137,787 | 37,328 -  | 2 |
| GenelD:10003871 | Gm10516       | 1  | 192,136,898 | 192,151,025 | 14,127 +  | 2 |
| GenelD:226861   | Hhat          | 1  | 192,512,828 | 192,771,219 | 258,391 - | 1 |
| GenelD:320952   | A730013G03Rik | 1  | 192,833,173 | 192,835,213 | 2,040 -   | 1 |
| GenelD:73455    | 1700065J18Rik | 1  | 192,841,705 | 192,842,739 | 1,034 +   | 1 |
| GenelD:214791   | Sertad4       | 1  | 192,844,488 | 192,855,752 | 11,264 -  | 2 |
| GenelD:10050347 | Gm15867       | 1  | 192,852,035 | 192,856,482 | 4,447 +   | 1 |
| GenelD:18845    | Plxna2        | 1  | 194,619,829 | 194,816,869 | 197,040 + | 1 |
| GenelD:213783   | Plekhg1       | 10 | 3,740,377   | 3,967,303   | 226,926 + | 1 |
| GenelD:270685   | Mthfd1l       | 10 | 3,973,075   | 4,167,081   | 194,006 + | 1 |
| GenelD:83397    | Akap12        | 10 | 4,266,329   | 4,359,471   | 93,142 +  | 1 |

|                 |               |    |            |            |           |   |
|-----------------|---------------|----|------------|------------|-----------|---|
| GenelD:381990   | Zbtb2         | 10 | 4,367,074  | 4,388,108  | 21,034 -  | 1 |
| GenelD:66084    | Rmnd1         | 10 | 4,403,169  | 4,432,352  | 29,183 -  | 1 |
| GenelD:73419    | 1700052N19Rik | 10 | 4,432,605  | 4,455,140  | 22,535 +  | 1 |
| GenelD:67141    | Fbxo5         | 10 | 5,799,158  | 5,805,465  | 6,307 -   | 1 |
| GenelD:108853   | Mtrf1l        | 10 | 5,811,887  | 5,823,943  | 12,056 -  | 2 |
| GenelD:56533    | Rgs17         | 10 | 5,825,663  | 5,922,400  | 96,737 -  | 1 |
| GenelD:215748   | Cnksr3        | 10 | 7,119,062  | 7,212,237  | 93,175 -  | 1 |
| GenelD:237253   | Lrp11         | 10 | 7,589,800  | 7,625,483  | 35,683 +  | 1 |
| GenelD:18537    | Pcmt1         | 10 | 7,630,236  | 7,663,584  | 33,348 -  | 1 |
| GenelD:320642   | A630066F11Rik | 10 | 7,663,371  | 7,664,623  | 1,252 +   | 1 |
| GenelD:69912    | Nup43         | 10 | 7,667,504  | 7,678,886  | 11,382 +  | 2 |
| GenelD:407824   | BC020402      | 10 | 7,678,971  | 7,681,158  | 2,187 -   | 1 |
| GenelD:16798    | Lats1         | 10 | 7,681,209  | 7,716,461  | 35,252 +  | 1 |
| GenelD:76227    | 6530403G13Rik | 10 | 7,791,385  | 7,792,903  | 1,518 -   | 1 |
| GenelD:67418    | Ppil4         | 10 | 7,792,894  | 7,822,563  | 29,669 +  | 1 |
| GenelD:68652    | Tab2          | 10 | 7,905,648  | 7,956,123  | 50,475 -  | 1 |
| GenelD:338362   | Ust           | 10 | 8,204,753  | 8,518,825  | 314,072 - | 1 |
| GenelD:70097    | Sash1         | 10 | 8,722,219  | 8,886,070  | 163,851 - | 1 |
| GenelD:10105602 | LOC101056021  | 10 | 8,884,594  | 8,886,878  | 2,284 +   | 1 |
| GenelD:78808    | Stxbp5        | 10 | 9,755,547  | 9,901,040  | 145,493 - | 1 |
| GenelD:71865    | Fbxo30        | 10 | 11,281,330 | 11,297,969 | 16,639 +  | 1 |
| GenelD:22288    | Utrn          | 10 | 12,382,188 | 12,861,735 | 479,547 - | 1 |
| GenelD:22634    | Plagl1        | 10 | 13,090,788 | 13,131,694 | 40,906 +  | 1 |
| GenelD:353258   | Ltv1          | 10 | 13,178,637 | 13,193,137 | 14,500 -  | 1 |
| GenelD:215789   | Phactr2       | 10 | 13,207,717 | 13,474,396 | 266,679 - | 1 |
| GenelD:15273    | Hivep2        | 10 | 13,966,379 | 14,151,378 | 184,999 + | 2 |
| GenelD:10050421 | Gm20114       | 10 | 13,966,961 | 14,007,996 | 41,035 +  | 2 |
| GenelD:66201    | Vta1          | 10 | 14,655,333 | 14,705,489 | 50,156 -  | 1 |
| GenelD:69412    | 1700016L04Rik | 10 | 14,705,609 | 14,759,019 | 53,410 +  | 1 |
| GenelD:76743    | Gje1          | 10 | 14,715,626 | 14,718,214 | 2,588 -   | 1 |
| GenelD:17684    | Cited2        | 10 | 17,723,228 | 17,725,674 | 2,446 +   | 1 |
| GenelD:73112    | Abrac1        | 10 | 18,011,260 | 18,023,252 | 11,992 -  | 1 |
| GenelD:19707    | Reps1         | 10 | 18,055,940 | 18,125,155 | 69,215 +  | 1 |
| GenelD:26408    | Map3k5        | 10 | 19,934,526 | 20,142,750 | 208,224 + | 1 |
| GenelD:56422    | Hbs1l         | 10 | 21,295,979 | 21,368,889 | 72,910 +  | 1 |
| GenelD:20393    | Sgk1          | 10 | 21,882,184 | 21,999,903 | 117,719 + | 2 |
| GenelD:237336   | Tbpl1         | 10 | 22,703,877 | 22,731,447 | 27,570 -  | 1 |
| GenelD:10003858 | Gm10824       | 10 | 22,815,749 | 22,823,330 | 7,581 +   | 1 |
| GenelD:21412    | Tcf21         | 10 | 22,817,263 | 22,820,128 | 2,865 -   | 1 |
| GenelD:20042    | Rps12         | 10 | 23,785,183 | 23,787,209 | 2,026 -   | 1 |
| GenelD:10052907 | Snora33       | 10 | 23,785,347 | 23,785,451 | 104 -     | 1 |
| GenelD:10052907 | Snord100      | 10 | 23,785,754 | 23,785,821 | 67 -      | 1 |
| GenelD:76306    | Slc18b1       | 10 | 23,796,986 | 23,827,968 | 30,982 +  | 1 |
| GenelD:53331    | Stx7          | 10 | 24,149,317 | 24,188,959 | 39,642 +  | 1 |
| GenelD:14219    | Ctgf          | 10 | 24,595,442 | 24,598,683 | 3,241 +   | 1 |
| GenelD:13822    | Epb4.1l2      | 10 | 25,359,798 | 25,523,519 | 163,721 + | 1 |
| GenelD:237339   | L3mbtl3       | 10 | 26,275,452 | 26,375,185 | 99,733 -  | 1 |



|                 |               |    |            |            |           |   |
|-----------------|---------------|----|------------|------------|-----------|---|
| GenelD:19272    | Ptprk         | 10 | 28,074,820 | 28,597,397 | 522,577 + | 1 |
| GenelD:67412    | Soga3         | 10 | 29,143,996 | 29,199,630 | 55,634 +  | 1 |
| GenelD:66311    | Cenpw         | 10 | 30,196,009 | 30,200,540 | 4,531 -   | 1 |
| GenelD:73681    | Trmt11        | 10 | 30,534,225 | 30,600,749 | 66,524 -  | 1 |
| GenelD:10050458 | Gm20300       | 10 | 30,603,195 | 30,606,634 | 3,439 -   | 1 |
| GenelD:66847    | Hint3         | 10 | 30,608,207 | 30,618,366 | 10,159 -  | 1 |
| GenelD:15214    | Hey2          | 10 | 30,832,359 | 30,842,783 | 10,424 -  | 1 |
| GenelD:21987    | Tpd52l1       | 10 | 31,332,380 | 31,445,921 | 113,541 - | 1 |
| GenelD:66521    | Rwdd1         | 10 | 33,996,555 | 34,019,616 | 23,061 -  | 1 |
| GenelD:212898   | Dse           | 10 | 34,151,393 | 34,207,551 | 56,158 -  | 1 |
| GenelD:22110    | Tsyp1         | 10 | 34,282,190 | 34,284,885 | 2,695 +   | 1 |
| GenelD:17118    | Marcks        | 10 | 37,133,243 | 37,138,926 | 5,683 -   | 1 |
| GenelD:320504   | 5930403N24Rik | 10 | 37,139,404 | 37,151,315 | 11,911 +  | 1 |
| GenelD:14360    | Fyn           | 10 | 39,369,799 | 39,565,381 | 195,582 + | 1 |
| GenelD:327744   | E130307A14Rik | 10 | 39,621,411 | 39,732,007 | 110,596 - | 1 |
| GenelD:19714    | Rev3l         | 10 | 39,732,160 | 39,875,206 | 143,046 + | 1 |
| GenelD:11702    | Amd1          | 10 | 40,287,458 | 40,302,188 | 14,730 -  | 1 |
| GenelD:78334    | Cdk19         | 10 | 40,349,308 | 40,483,818 | 134,510 + | 1 |
| GenelD:327747   | Mettl24       | 10 | 40,683,282 | 40,811,083 | 127,801 + | 1 |
| GenelD:71713    | Cdc40         | 10 | 40,831,621 | 40,883,143 | 51,522 -  | 1 |
| GenelD:83767    | Wasf1         | 10 | 40,883,534 | 40,938,569 | 55,035 +  | 1 |
| GenelD:103199   | Fig4          | 10 | 41,188,172 | 41,303,241 | 115,069 - | 1 |
| GenelD:171580   | Mical1        | 10 | 41,476,314 | 41,487,030 | 10,716 +  | 1 |
| GenelD:20598    | Smpd2         | 10 | 41,487,172 | 41,490,340 | 3,168 -   | 1 |
| GenelD:73075    | Ppil6         | 10 | 41,490,439 | 41,514,288 | 23,849 +  | 2 |
| GenelD:53599    | Cd164         | 10 | 41,519,500 | 41,531,042 | 11,542 +  | 1 |
| GenelD:140742   | Sesn1         | 10 | 41,810,574 | 41,908,436 | 97,862 +  | 1 |
| GenelD:56484    | Foxo3         | 10 | 42,185,786 | 42,276,742 | 90,956 -  | 1 |
| GenelD:215951   | Lace1         | 10 | 42,312,585 | 42,478,565 | 165,980 - | 1 |
| GenelD:54198    | Snx3          | 10 | 42,502,054 | 42,535,369 | 33,315 +  | 1 |
| GenelD:14628    | Ostm1         | 10 | 42,678,916 | 42,702,462 | 23,546 +  | 1 |
| GenelD:140740   | Sec63         | 10 | 42,761,496 | 42,832,514 | 71,018 +  | 1 |
| GenelD:109205   | Sobp          | 10 | 43,002,500 | 43,174,530 | 172,030 - | 2 |
| GenelD:74530    | 9030612E09Rik | 10 | 43,174,704 | 43,176,562 | 1,858 +   | 1 |
| GenelD:331623   | Bend3         | 10 | 43,479,140 | 43,515,417 | 36,277 +  | 3 |
| GenelD:12484    | Cd24a         | 10 | 43,579,169 | 43,584,265 | 5,096 +   | 1 |
| GenelD:76563    | Qrs1          | 10 | 43,874,190 | 43,901,736 | 27,546 -  | 1 |
| GenelD:170728   | Rtn4ip1       | 10 | 43,901,807 | 43,947,862 | 46,055 +  | 1 |
| GenelD:19072    | Prep          | 10 | 45,067,214 | 45,158,995 | 91,781 +  | 1 |
| GenelD:209462   | Hace1         | 10 | 45,577,829 | 45,712,345 | 134,516 + | 1 |
| GenelD:66686    | Dcbld1        | 10 | 52,233,619 | 52,321,377 | 87,758 +  | 1 |
| GenelD:94221    | Gopc          | 10 | 52,337,024 | 52,382,124 | 45,100 -  | 1 |
| GenelD:66650    | Nepn          | 10 | 52,391,608 | 52,404,604 | 12,996 +  | 1 |
| GenelD:52014    | Nus1          | 10 | 52,417,547 | 52,440,192 | 22,645 +  | 1 |
| GenelD:10003872 | Cep85l        | 10 | 53,278,081 | 53,379,851 | 101,770 - | 1 |
| GenelD:71567    | Mcm9          | 10 | 53,537,324 | 53,630,439 | 93,115 -  | 1 |
| GenelD:66403    | Asf1a         | 10 | 53,596,961 | 53,609,225 | 12,264 +  | 1 |

|                 |               |    |            |            |             |   |
|-----------------|---------------|----|------------|------------|-------------|---|
| GenelD:10004255 | Gm3902        | 10 | 53,597,458 | 53,598,406 | 948 +       | 1 |
| GenelD:17155    | Man1a         | 10 | 53,906,033 | 54,075,796 | 169,763 -   | 1 |
| GenelD:10050292 | Gm16998       | 10 | 54,075,922 | 54,081,081 | 5,159 +     | 1 |
| GenelD:544696   | D630037F22Rik | 10 | 56,014,293 | 56,228,689 | 214,396 -   | 1 |
| GenelD:73390    | Msl3l2        | 10 | 56,106,917 | 56,116,880 | 9,963 +     | 1 |
| GenelD:56442    | Serinc1       | 10 | 57,515,774 | 57,532,529 | 16,755 -    | 1 |
| GenelD:19386    | Ranbp2        | 10 | 58,446,852 | 58,494,155 | 47,303 +    | 1 |
| GenelD:103080   | Sept10        | 10 | 59,141,627 | 59,221,847 | 80,220 -    | 1 |
| GenelD:268301   | Sowahc        | 10 | 59,221,922 | 59,226,434 | 4,512 +     | 1 |
| GenelD:18451    | P4ha1         | 10 | 59,323,296 | 59,373,304 | 50,008 +    | 1 |
| GenelD:215999   | Mcu           | 10 | 59,446,984 | 59,616,692 | 169,708 -   | 1 |
| GenelD:56709    | Dnajb12       | 10 | 59,879,591 | 59,898,016 | 18,425 +    | 2 |
| GenelD:69090    | Ascc1         | 10 | 60,002,805 | 60,099,990 | 97,185 +    | 1 |
| GenelD:94214    | Spock2        | 10 | 60,106,257 | 60,133,914 | 27,657 +    | 1 |
| GenelD:53374    | Chst3         | 10 | 60,181,527 | 60,219,260 | 37,733 -    | 1 |
| GenelD:19156    | Psap          | 10 | 60,277,628 | 60,302,600 | 24,972 +    | 1 |
| GenelD:22295    | Cdh23         | 10 | 60,302,750 | 60,696,490 | 393,740 -   | 1 |
| GenelD:107449   | Unc5b         | 10 | 60,762,595 | 60,831,581 | 68,986 -    | 1 |
| GenelD:20397    | Sgpl1         | 10 | 61,098,642 | 61,147,665 | 49,023 -    | 2 |
| GenelD:237360   | Adamts14      | 10 | 61,197,112 | 61,273,438 | 76,326 -    | 1 |
| GenelD:27355    | Pald1         | 10 | 61,319,657 | 61,383,523 | 63,866 -    | 1 |
| GenelD:13688    | Eif4ebp2      | 10 | 61,432,497 | 61,452,669 | 20,172 -    | 1 |
| GenelD:67895    | Ppa1          | 10 | 61,648,621 | 61,674,165 | 25,544 +    | 2 |
| GenelD:20224    | Sar1a         | 10 | 61,680,321 | 61,693,297 | 12,976 +    | 2 |
| GenelD:71767    | Tysnd1        | 10 | 61,695,514 | 61,702,773 | 7,259 +     | 1 |
| GenelD:404634   | H2afy2        | 10 | 61,738,647 | 61,783,864 | 45,217 -    | 1 |
| GenelD:10062858 | Mir5108       | 10 | 61,774,737 | 61,774,821 | 84 +        | 1 |
| GenelD:12817    | Col13a1       | 10 | 61,838,498 | 61,979,108 | 140,610 -   | 1 |
| GenelD:70423    | Tspan15       | 10 | 62,185,396 | 62,231,218 | 45,822 -    | 1 |
| GenelD:72320    | 2510003E04Rik | 10 | 62,558,470 | 62,578,457 | 19,987 -    | 1 |
| GenelD:56200    | Ddx21         | 10 | 62,580,247 | 62,602,298 | 22,051 -    | 2 |
| GenelD:94213    | Ddx50         | 10 | 62,616,023 | 62,651,198 | 35,175 -    | 1 |
| GenelD:216021   | Stox1         | 10 | 62,659,422 | 62,726,099 | 66,677 -    | 1 |
| GenelD:73132    | Slc25a16      | 10 | 62,920,633 | 62,946,494 | 25,861 +    | 2 |
| GenelD:327762   | Dna2          | 10 | 62,947,029 | 62,974,188 | 27,159 +    | 2 |
| GenelD:70432    | Rufy2         | 10 | 62,980,223 | 63,018,742 | 38,519 +    | 2 |
| GenelD:432467   | Hnrnp3        | 10 | 63,014,664 | 63,023,849 | 9,185 -     | 1 |
| GenelD:67307    | Pbld2         | 10 | 63,024,512 | 63,058,812 | 34,300 +    | 1 |
| GenelD:641387   | 1700120B22Rik | 10 | 63,243,068 | 63,244,453 | 1,385 -     | 1 |
| GenelD:67345    | Herc4         | 10 | 63,243,797 | 63,317,881 | 74,084 +    | 1 |
| GenelD:10050272 | Gm19337       | 10 | 63,250,932 | 63,252,515 | 1,583 +     | 1 |
| GenelD:631906   | Gm7075        | 10 | 63,420,608 | 63,421,752 | 1,144 -     | 1 |
| GenelD:216033   | Ctnna3        | 10 | 63,430,098 | 65,003,667 | 1,573,569 + | 1 |
| GenelD:28193    | Reep3         | 10 | 67,009,189 | 67,096,988 | 87,799 -    | 2 |
| GenelD:108829   | Jmjd1c        | 10 | 67,127,258 | 67,256,326 | 129,068 +   | 1 |
| GenelD:641340   | Nrbf2         | 10 | 67,266,689 | 67,285,281 | 18,592 -    | 1 |
| GenelD:13654    | Egr2          | 10 | 67,537,869 | 67,542,188 | 4,319 +     | 2 |

|               |               |    |            |            |           |   |
|---------------|---------------|----|------------|------------|-----------|---|
| GenelD:211488 | Ado           | 10 | 67,544,511 | 67,548,955 | 4,444 -   | 2 |
| GenelD:216049 | Zfp365        | 10 | 67,886,105 | 67,912,662 | 26,557 -  | 1 |
| GenelD:170799 | Rtkn2         | 10 | 67,979,598 | 68,043,864 | 64,266 +  | 1 |
| GenelD:69288  | Rhobtb1       | 10 | 69,208,552 | 69,291,791 | 83,239 +  | 1 |
| GenelD:320700 | A930033H14Rik | 10 | 69,209,762 | 69,213,252 | 3,490 -   | 1 |
| GenelD:12534  | Cdk1          | 10 | 69,336,635 | 69,352,912 | 16,277 -  | 1 |
| GenelD:268307 | 4833431D13Rik | 10 | 69,398,147 | 69,602,138 | 203,991 + | 1 |
| GenelD:76551  | Ccdc6         | 10 | 70,097,121 | 70,193,200 | 96,079 +  | 1 |
| GenelD:83675  | Bicc1         | 10 | 70,925,086 | 71,159,634 | 234,548 - | 1 |
| GenelD:319572 | C730027H18Rik | 10 | 71,168,737 | 71,182,040 | 13,303 -  | 1 |
| GenelD:21780  | Tfam          | 10 | 71,225,477 | 71,238,044 | 12,567 -  | 1 |
| GenelD:216080 | Ube2d1        | 10 | 71,254,980 | 71,285,262 | 30,282 -  | 1 |
| GenelD:52637  | Cisd1         | 10 | 71,330,494 | 71,344,849 | 14,355 -  | 1 |
| GenelD:69718  | lpmk          | 10 | 71,347,793 | 71,385,885 | 38,092 +  | 1 |
| GenelD:76877  | Rab36         | 10 | 75,037,089 | 75,054,100 | 17,011 +  | 1 |
| GenelD:110279 | Bcr           | 10 | 75,060,896 | 75,184,923 | 124,027 + | 1 |
| GenelD:11540  | Adora2a       | 10 | 75,316,943 | 75,334,788 | 17,845 +  | 1 |
| GenelD:68778  | Gucd1         | 10 | 75,506,814 | 75,517,322 | 10,508 -  | 1 |
| GenelD:67332  | Snrpd3        | 10 | 75,518,042 | 75,535,440 | 17,398 +  | 1 |
| GenelD:70377  | Derl3         | 10 | 75,893,398 | 75,895,941 | 2,543 +   | 1 |
| GenelD:20587  | Smarcb1       | 10 | 75,896,769 | 75,921,614 | 24,845 -  | 1 |
| GenelD:17385  | Mmp11         | 10 | 75,923,224 | 75,932,463 | 9,239 -   | 2 |
| GenelD:103172 | Chchd10       | 10 | 75,935,573 | 75,937,734 | 2,161 +   | 2 |
| GenelD:333670 | Gm867         | 10 | 75,937,723 | 75,940,666 | 2,943 -   | 2 |
| GenelD:64451  | Dip2a         | 10 | 76,263,049 | 76,345,291 | 82,242 -  | 1 |
| GenelD:18541  | Pcnt          | 10 | 76,351,254 | 76,442,912 | 91,658 -  | 1 |
| GenelD:59093  | Pcbp3         | 10 | 76,761,854 | 76,961,947 | 200,093 - | 1 |
| GenelD:12822  | Col18a1       | 10 | 77,052,179 | 77,166,530 | 114,351 - | 1 |
| GenelD:108707 | Fam207a       | 10 | 77,486,655 | 77,515,813 | 29,158 -  | 1 |
| GenelD:108705 | Pttg1ip       | 10 | 77,581,767 | 77,598,732 | 16,965 +  | 1 |
| GenelD:20610  | Sumo3         | 10 | 77,606,234 | 77,618,331 | 12,097 +  | 2 |
| GenelD:22213  | Ube2g2        | 10 | 77,622,321 | 77,645,990 | 23,669 +  | 1 |
| GenelD:28240  | Trpm2         | 10 | 77,907,722 | 77,969,872 | 62,150 -  | 1 |
| GenelD:67884  | 1810043G02Rik | 10 | 77,978,650 | 77,985,438 | 6,788 +   | 1 |
| GenelD:18641  | Pfkl          | 10 | 77,986,947 | 78,009,796 | 22,849 -  | 2 |
| GenelD:54427  | Dnmt3l        | 10 | 78,042,287 | 78,063,615 | 21,328 +  | 1 |
| GenelD:50723  | Icosl         | 10 | 78,069,368 | 78,079,525 | 10,157 +  | 1 |
| GenelD:110816 | Pwp2          | 10 | 78,170,910 | 78,185,149 | 14,239 -  | 1 |
| GenelD:216131 | Trappc10      | 10 | 78,186,725 | 78,244,642 | 57,917 -  | 2 |
| GenelD:13014  | Cstb          | 10 | 78,425,670 | 78,427,622 | 1,952 +   | 1 |
| GenelD:216134 | Pdxk          | 10 | 78,436,747 | 78,464,948 | 28,201 -  | 1 |
| GenelD:70427  | Mier2         | 10 | 79,540,245 | 79,555,091 | 14,846 -  | 1 |
| GenelD:216148 | Shc2          | 10 | 79,617,934 | 79,637,918 | 19,984 -  | 1 |
| GenelD:382384 | Odf3l2        | 10 | 79,639,526 | 79,645,738 | 6,212 -   | 1 |
| GenelD:17123  | Madcam1       | 10 | 79,664,574 | 79,668,536 | 3,962 +   | 2 |
| GenelD:110012 | Tpgs1         | 10 | 79,669,410 | 79,676,126 | 6,716 +   | 2 |
| GenelD:216150 | Cdc34         | 10 | 79,682,195 | 79,688,398 | 6,203 +   | 1 |

|                 |               |    |            |            |          |   |
|-----------------|---------------|----|------------|------------|----------|---|
| GenelD:15166    | Hcn2          | 10 | 79,716,634 | 79,736,108 | 19,474 + | 1 |
| GenelD:216151   | Polrmt        | 10 | 79,736,125 | 79,746,581 | 10,456 - | 1 |
| GenelD:67112    | Fgf22         | 10 | 79,755,119 | 79,756,961 | 1,842 +  | 1 |
| GenelD:70294    | Rnf126        | 10 | 79,758,515 | 79,766,952 | 8,437 -  | 1 |
| GenelD:83554    | Fstl3         | 10 | 79,777,274 | 79,782,630 | 5,356 +  | 1 |
| GenelD:73106    | Prss57        | 10 | 79,781,474 | 79,788,985 | 7,511 -  | 1 |
| GenelD:18483    | Palm          | 10 | 79,793,572 | 79,820,896 | 27,324 + | 1 |
| GenelD:414101   | E130317F20Rik | 10 | 79,851,377 | 79,854,971 | 3,594 -  | 1 |
| GenelD:19205    | Ptbp1         | 10 | 79,854,605 | 79,864,433 | 9,828 +  | 2 |
| GenelD:216152   | BC005764      | 10 | 79,860,475 | 79,874,634 | 14,159 - | 2 |
| GenelD:19152    | Prtn3         | 10 | 79,879,667 | 79,883,174 | 3,507 +  | 1 |
| GenelD:50701    | Elane         | 10 | 79,886,312 | 79,888,216 | 1,904 +  | 1 |
| GenelD:11537    | Cfd           | 10 | 79,890,853 | 79,892,656 | 1,803 +  | 1 |
| GenelD:216154   | Med16         | 10 | 79,894,707 | 79,908,938 | 14,231 - | 2 |
| GenelD:109284   | R3hdm4        | 10 | 79,910,053 | 79,916,930 | 6,877 -  | 2 |
| GenelD:114229   | Kiss1r        | 10 | 79,916,971 | 79,922,273 | 5,302 +  | 2 |
| GenelD:13496    | Arid3a        | 10 | 79,927,072 | 79,955,012 | 27,940 + | 3 |
| GenelD:216156   | Wdr18         | 10 | 79,960,152 | 79,969,246 | 9,094 +  | 2 |
| GenelD:170483   | Grin3b        | 10 | 79,970,724 | 79,977,190 | 6,466 +  | 2 |
| GenelD:216157   | Tmem259       | 10 | 79,977,120 | 79,984,330 | 7,210 -  | 3 |
| GenelD:12798    | Cnn2          | 10 | 79,988,600 | 79,995,400 | 6,800 +  | 2 |
| GenelD:27403    | Abca7         | 10 | 79,997,615 | 80,015,572 | 17,957 + | 1 |
| GenelD:625249   | Gpx4          | 10 | 80,053,510 | 80,056,439 | 2,929 +  | 2 |
| GenelD:216161   | Sbno2         | 10 | 80,057,014 | 80,102,702 | 45,688 - | 3 |
| GenelD:20869    | Stk11         | 10 | 80,116,536 | 80,130,470 | 13,934 + | 3 |
| GenelD:10050365 | Dos           | 10 | 80,130,434 | 80,139,367 | 8,933 -  | 6 |
| GenelD:66043    | Atp5d         | 10 | 80,142,315 | 80,145,818 | 3,503 +  | 7 |
| GenelD:59090    | Midn          | 10 | 80,148,290 | 80,158,367 | 10,077 + | 7 |
| GenelD:12696    | Cirbp         | 10 | 80,167,841 | 80,171,653 | 3,812 +  | 2 |
| GenelD:69770    | 1600002K03Rik | 10 | 80,172,944 | 80,175,119 | 2,175 +  | 2 |
| GenelD:13637    | Efna2         | 10 | 80,179,482 | 80,190,010 | 10,528 + | 1 |
| GenelD:68114    | Mum1          | 10 | 80,226,598 | 80,245,144 | 18,546 + | 1 |
| GenelD:75406    | Ndufs7        | 10 | 80,249,452 | 80,256,792 | 7,340 +  | 1 |
| GenelD:14431    | Gamt          | 10 | 80,258,151 | 80,260,968 | 2,817 -  | 1 |
| GenelD:70248    | Dazap1        | 10 | 80,264,991 | 80,288,413 | 23,422 + | 2 |
| GenelD:103232   | Gm15122       | 10 | 80,282,444 | 80,283,006 | 562 -    | 1 |
| GenelD:20054    | Rps15         | 10 | 80,292,431 | 80,294,114 | 1,683 +  | 1 |
| GenelD:23805    | Apc2          | 10 | 80,301,820 | 80,318,256 | 16,436 + | 4 |
| GenelD:66374    | 2310011J03Rik | 10 | 80,318,255 | 80,320,548 | 2,293 -  | 4 |
| GenelD:18551    | Pcsk4         | 10 | 80,321,283 | 80,329,473 | 8,190 -  | 4 |
| GenelD:70335    | Reep6         | 10 | 80,330,145 | 80,336,441 | 6,296 +  | 4 |
| GenelD:66548    | Adamts15      | 10 | 80,340,716 | 80,348,446 | 7,730 -  | 3 |
| GenelD:216166   | Plk5          | 10 | 80,356,459 | 80,365,489 | 9,030 +  | 1 |
| GenelD:237400   | Mex3d         | 10 | 80,380,355 | 80,387,651 | 7,296 -  | 3 |
| GenelD:17192    | Mbd3          | 10 | 80,392,541 | 80,399,479 | 6,938 -  | 2 |
| GenelD:21423    | Tcf3          | 10 | 80,409,165 | 80,433,653 | 24,488 - | 1 |
| GenelD:67331    | Atp8b3        | 10 | 80,519,585 | 80,539,124 | 19,539 - | 1 |

|                 |               |    |            |            |          |   |
|-----------------|---------------|----|------------|------------|----------|---|
| GenelD:66932    | Rexo1         | 10 | 80,540,926 | 80,561,560 | 20,634 - | 2 |
| GenelD:118445   | Klf16         | 10 | 80,567,121 | 80,577,296 | 10,175 - | 3 |
| GenelD:216169   | Abhd17a       | 10 | 80,583,649 | 80,590,341 | 6,692 -  | 3 |
| GenelD:10011339 | Adat3         | 10 | 80,602,880 | 80,607,654 | 4,774 +  | 2 |
| GenelD:56214    | Scamp4        | 10 | 80,602,882 | 80,615,783 | 12,901 + | 2 |
| GenelD:103236   | Csnk1g2       | 10 | 80,622,780 | 80,640,771 | 17,991 + | 1 |
| GenelD:208198   | Btbd2         | 10 | 80,642,617 | 80,657,071 | 14,454 - | 1 |
| GenelD:11776    | Ap3d1         | 10 | 80,706,978 | 80,742,211 | 35,233 - | 1 |
| GenelD:208266   | Dot1l         | 10 | 80,755,206 | 80,794,347 | 39,141 + | 2 |
| GenelD:78670    | Plekhj1       | 10 | 80,796,099 | 80,798,626 | 2,527 -  | 2 |
| GenelD:20222    | Sf3a2         | 10 | 80,798,735 | 80,804,922 | 6,187 +  | 2 |
| GenelD:11705    | Amh           | 10 | 80,805,248 | 80,807,648 | 2,400 +  | 1 |
| GenelD:71912    | Jsrp1         | 10 | 80,808,496 | 80,813,498 | 5,002 -  | 1 |
| GenelD:18245    | Oaz1          | 10 | 80,826,656 | 80,829,290 | 2,634 +  | 1 |
| GenelD:10031677 | Mir1982       | 10 | 80,828,797 | 80,828,870 | 73 +     | 1 |
| GenelD:237403   | Lingo3        | 10 | 80,832,801 | 80,844,039 | 11,238 - | 1 |
| GenelD:66094    | Lsm7          | 10 | 80,852,825 | 80,855,209 | 2,384 -  | 1 |
| GenelD:73218    | Sppl2b        | 10 | 80,855,275 | 80,868,708 | 13,433 + | 1 |
| GenelD:432478   | Tmprss9       | 10 | 80,879,816 | 80,899,494 | 19,678 + | 1 |
| GenelD:30055    | Timm13        | 10 | 80,899,450 | 80,900,969 | 1,519 -  | 1 |
| GenelD:16907    | Lmnb2         | 10 | 80,901,363 | 80,918,245 | 16,882 - | 1 |
| GenelD:17873    | Gadd45b       | 10 | 80,930,091 | 80,932,204 | 2,113 +  | 3 |
| GenelD:106947   | Slc39a3       | 10 | 81,028,540 | 81,033,912 | 5,372 -  | 1 |
| GenelD:52551    | Sgta          | 10 | 81,044,073 | 81,060,154 | 16,081 - | 1 |
| GenelD:208677   | Creb3l3       | 10 | 81,084,333 | 81,098,872 | 14,539 - | 1 |
| GenelD:26396    | Map2k2        | 10 | 81,105,947 | 81,124,697 | 18,750 + | 2 |
| GenelD:16969    | Zbtb7a        | 10 | 81,136,271 | 81,151,657 | 15,386 + | 4 |
| GenelD:59004    | Pias4         | 10 | 81,153,961 | 81,167,720 | 13,759 - | 1 |
| GenelD:13629    | Eef2          | 10 | 81,176,631 | 81,182,509 | 5,878 +  | 1 |
| GenelD:13144    | Dapk3         | 10 | 81,183,007 | 81,193,197 | 10,190 + | 1 |
| GenelD:69678    | 2310050B05Rik | 10 | 81,194,691 | 81,208,370 | 13,679 + | 1 |
| GenelD:69564    | Nmrk2         | 10 | 81,198,170 | 81,202,037 | 3,867 -  | 1 |
| GenelD:27375    | Tjp3          | 10 | 81,273,200 | 81,291,267 | 18,067 - | 1 |
| GenelD:18717    | Pip5k1c       | 10 | 81,292,972 | 81,319,974 | 27,002 + | 2 |
| GenelD:70312    | Cactin        | 10 | 81,321,103 | 81,326,251 | 5,148 +  | 2 |
| GenelD:21390    | Tbxa2r        | 10 | 81,328,731 | 81,335,172 | 6,441 +  | 2 |
| GenelD:209047   | Gipc3         | 10 | 81,337,762 | 81,343,266 | 5,504 -  | 1 |
| GenelD:15353    | Hmg20b        | 10 | 81,346,046 | 81,350,457 | 4,411 -  | 1 |
| GenelD:73822    | Mfsd12        | 10 | 81,357,570 | 81,364,035 | 6,465 +  | 1 |
| GenelD:432479   | 4930404N11Rik | 10 | 81,364,024 | 81,365,820 | 1,796 -  | 1 |
| GenelD:56371    | Fzr1          | 10 | 81,366,879 | 81,378,370 | 11,491 - | 1 |
| GenelD:102115   | Dohh          | 10 | 81,384,428 | 81,388,352 | 3,924 +  | 1 |
| GenelD:72273    | 2210404O07Rik | 10 | 81,393,064 | 81,395,079 | 2,015 +  | 1 |
| GenelD:18029    | Nfic          | 10 | 81,396,191 | 81,427,173 | 30,982 - | 2 |
| GenelD:319586   | Celf5         | 10 | 81,459,228 | 81,482,709 | 23,481 - | 1 |
| GenelD:14672    | Gna11         | 10 | 81,528,732 | 81,545,046 | 16,314 - | 1 |
| GenelD:14797    | Aes           | 10 | 81,559,560 | 81,566,364 | 6,804 +  | 1 |

|                 |               |    |            |            |           |   |
|-----------------|---------------|----|------------|------------|-----------|---|
| GenelD:21886    | Tle2          | 10 | 81,575,287 | 81,590,845 | 15,558 +  | 1 |
| GenelD:70615    | Ankrd24       | 10 | 81,628,540 | 81,647,612 | 19,072 +  | 1 |
| GenelD:10023320 | Gm10778       | 10 | 81,649,069 | 81,667,361 | 18,292 +  | 1 |
| GenelD:216177   | AU041133      | 10 | 82,128,013 | 82,153,065 | 25,052 +  | 1 |
| GenelD:74782    | Glt8d2        | 10 | 82,650,433 | 82,690,650 | 40,217 -  | 1 |
| GenelD:67933    | Hcfc2         | 10 | 82,699,007 | 82,741,392 | 42,385 +  | 1 |
| GenelD:58250    | Chst11        | 10 | 82,985,497 | 83,195,900 | 210,403 + | 1 |
| GenelD:28109    | D10Wsu102e    | 10 | 83,360,221 | 83,368,835 | 8,614 +   | 1 |
| GenelD:216188   | Aldh1l2       | 10 | 83,487,447 | 83,534,140 | 46,693 -  | 1 |
| GenelD:319277   | A230046K03Rik | 10 | 83,543,941 | 83,596,473 | 52,532 +  | 1 |
| GenelD:77976    | Nuak1         | 10 | 84,371,311 | 84,440,471 | 69,160 -  | 1 |
| GenelD:216197   | Ckap4         | 10 | 84,526,305 | 84,533,888 | 7,583 -   | 1 |
| GenelD:216198   | Tcp11l2       | 10 | 84,576,947 | 84,614,355 | 37,408 +  | 1 |
| GenelD:14202    | Fhl4          | 10 | 85,097,019 | 85,102,495 | 5,476 -   | 1 |
| GenelD:103266   | Al597468      | 10 | 85,102,627 | 85,117,747 | 15,120 +  | 1 |
| GenelD:12952    | Cry1          | 10 | 85,131,700 | 85,185,054 | 53,354 -  | 1 |
| GenelD:74007    | Btbd11        | 10 | 85,386,814 | 85,660,292 | 273,478 + | 1 |
| GenelD:103136   | Pwp1          | 10 | 85,871,831 | 85,889,103 | 17,272 +  | 1 |
| GenelD:72843    | Prdm4         | 10 | 85,891,966 | 85,916,945 | 24,979 -  | 1 |
| GenelD:67341    | Ascl4         | 10 | 85,928,491 | 85,929,647 | 1,156 +   | 1 |
| GenelD:28088    | D10Wsu52e     | 10 | 85,938,637 | 85,957,793 | 19,156 -  | 2 |
| GenelD:270757   | Bpifc         | 10 | 85,959,691 | 86,011,860 | 52,169 -  | 2 |
| GenelD:69754    | Fbxo7         | 10 | 86,021,929 | 86,048,328 | 26,399 +  | 1 |
| GenelD:27204    | Syn3          | 10 | 86,048,746 | 86,498,896 | 450,150 - | 1 |
| GenelD:21859    | Timp3         | 10 | 86,300,412 | 86,349,505 | 49,093 +  | 1 |
| GenelD:103220   | BC030307      | 10 | 86,705,811 | 86,776,843 | 71,032 +  | 1 |
| GenelD:103466   | Nt5dc3        | 10 | 86,779,005 | 86,838,389 | 59,384 +  | 1 |
| GenelD:75317    | Parpbp        | 10 | 88,091,398 | 88,146,941 | 55,543 -  | 1 |
| GenelD:69736    | Nup37         | 10 | 88,146,992 | 88,178,395 | 31,403 +  | 1 |
| GenelD:432486   | Gnptab        | 10 | 88,379,412 | 88,447,329 | 67,917 +  | 1 |
| GenelD:70683    | Utp20         | 10 | 88,746,607 | 88,826,814 | 80,207 -  | 1 |
| GenelD:75089    | Uhrf1bp1l     | 10 | 89,744,991 | 89,819,869 | 74,878 +  | 1 |
| GenelD:11783    | Apaf1         | 10 | 90,989,311 | 91,082,743 | 93,432 -  | 1 |
| GenelD:67454    | Ikbip         | 10 | 91,083,039 | 91,102,613 | 19,574 +  | 1 |
| GenelD:18674    | Slc25a3       | 10 | 91,116,578 | 91,123,963 | 7,385 -   | 1 |
| GenelD:21917    | Tmpo          | 10 | 91,147,571 | 91,171,582 | 24,011 -  | 1 |
| GenelD:237459   | Cdk17         | 10 | 93,160,876 | 93,241,342 | 80,466 +  | 1 |
| GenelD:10031668 | Mir1931       | 10 | 93,162,785 | 93,162,903 | 118 +     | 1 |
| GenelD:57764    | Ntn4          | 10 | 93,641,049 | 93,745,972 | 104,923 + | 1 |
| GenelD:327799   | Usp44         | 10 | 93,831,555 | 93,858,087 | 26,532 +  | 1 |
| GenelD:215008   | Vezt          | 10 | 93,968,100 | 94,035,748 | 67,648 -  | 1 |
| GenelD:13998    | Fgd6          | 10 | 94,036,001 | 94,145,339 | 109,338 + | 2 |
| GenelD:22025    | Nr2c1         | 10 | 94,147,931 | 94,197,214 | 49,283 +  | 1 |
| GenelD:319880   | Tmcc3         | 10 | 94,514,857 | 94,590,954 | 76,097 +  | 1 |
| GenelD:67723    | 4932415G12Rik | 10 | 94,673,493 | 94,688,613 | 15,120 -  | 1 |
| GenelD:77048    | Ccdc41        | 10 | 94,688,790 | 94,790,336 | 101,546 + | 1 |
| GenelD:54712    | Plxnc1        | 10 | 94,790,866 | 94,944,578 | 153,712 - | 2 |

|                 |               |    |             |             |           |   |
|-----------------|---------------|----|-------------|-------------|-----------|---|
| GenelD:12905    | Cradd         | 10 | 95,174,746  | 95,324,097  | 149,351 - | 1 |
| GenelD:216233   | Socs2         | 10 | 95,411,490  | 95,416,857  | 5,367 -   | 1 |
| GenelD:70523    | 5730420D15Rik | 10 | 95,417,375  | 95,428,640  | 11,265 +  | 1 |
| GenelD:93765    | Ube2n         | 10 | 95,515,162  | 95,545,658  | 30,496 +  | 1 |
| GenelD:71207    | Nudt4         | 10 | 95,547,007  | 95,564,167  | 17,160 -  | 1 |
| GenelD:10052646 | Mir3058       | 10 | 95,559,231  | 95,559,321  | 90 -      | 1 |
| GenelD:216238   | Eea1          | 10 | 95,940,663  | 96,045,518  | 104,855 + | 1 |
| GenelD:12226    | Btg1          | 10 | 96,617,001  | 96,622,813  | 5,812 +   | 1 |
| GenelD:67972    | Atp2b1        | 10 | 98,915,152  | 99,026,143  | 110,991 + | 1 |
| GenelD:382406   | Poc1b         | 10 | 99,107,171  | 99,197,988  | 90,817 +  | 1 |
| GenelD:14426    | Galnt4        | 10 | 99,108,135  | 99,113,247  | 5,112 +   | 1 |
| GenelD:67603    | Dusp6         | 10 | 99,263,231  | 99,267,489  | 4,258 +   | 3 |
| GenelD:278279   | Tmtc2         | 10 | 105,187,663 | 105,574,479 | 386,816 - | 1 |
| GenelD:327812   | Gm15663       | 10 | 105,574,551 | 105,583,870 | 9,319 +   | 1 |
| GenelD:17931    | Ppp1r12a      | 10 | 108,162,400 | 108,277,575 | 115,175 + | 1 |
| GenelD:114774   | Pawr          | 10 | 108,332,189 | 108,414,391 | 82,202 +  | 1 |
| GenelD:52679    | E2f7          | 10 | 110,745,465 | 110,787,384 | 41,919 +  | 1 |
| GenelD:320150   | Zdhhc17       | 10 | 110,941,779 | 111,010,066 | 68,287 -  | 1 |
| GenelD:237542   | Osbpl8        | 10 | 111,164,802 | 111,297,247 | 132,445 + | 1 |
| GenelD:53605    | Nap1l1        | 10 | 111,473,192 | 111,498,150 | 24,958 +  | 2 |
| GenelD:382421   | Gm5176        | 10 | 111,500,788 | 111,501,345 | 557 +     | 1 |
| GenelD:21664    | Phlda1        | 10 | 111,506,286 | 111,508,649 | 2,363 +   | 1 |
| GenelD:52705    | Krr1          | 10 | 111,972,695 | 111,988,430 | 15,735 +  | 1 |
| GenelD:382423   | Atxn7l3b      | 10 | 112,925,428 | 112,929,026 | 3,598 -   | 1 |
| GenelD:544737   | LOC544737     | 10 | 112,928,501 | 112,931,153 | 2,652 +   | 1 |
| GenelD:66687    | Tbc1d15       | 10 | 115,197,871 | 115,251,493 | 53,622 -  | 1 |
| GenelD:216344   | Rab21         | 10 | 115,289,862 | 115,315,591 | 25,729 -  | 1 |
| GenelD:10003855 | Gm10752       | 10 | 115,315,646 | 115,316,374 | 728 +     | 1 |
| GenelD:66816    | Thap2         | 10 | 115,369,966 | 115,384,435 | 14,469 -  | 1 |
| GenelD:216345   | Zfc3h1        | 10 | 115,384,959 | 115,432,771 | 47,812 +  | 1 |
| GenelD:14160    | Lgr5          | 10 | 115,450,314 | 115,587,780 | 137,466 - | 1 |
| GenelD:77798    | A930009A15Rik | 10 | 115,569,986 | 115,582,454 | 12,468 +  | 1 |
| GenelD:19263    | Ptprb         | 10 | 116,301,374 | 116,389,538 | 88,164 +  | 1 |
| GenelD:58802    | Kcnmb4        | 10 | 116,417,868 | 116,473,523 | 55,655 -  | 1 |
| GenelD:10050441 | 4933400F03Rik | 10 | 116,474,345 | 116,474,987 | 642 +     | 1 |
| GenelD:72068    | Cnot2         | 10 | 116,485,161 | 116,581,511 | 96,350 -  | 1 |
| GenelD:327824   | 5330438D12Rik | 10 | 116,581,484 | 116,583,515 | 2,031 +   | 1 |
| GenelD:12461    | Cct2          | 10 | 117,050,998 | 117,063,814 | 12,816 -  | 1 |
| GenelD:327826   | Frs2          | 10 | 117,070,127 | 117,148,474 | 78,347 -  | 2 |
| GenelD:17246    | Mdm2          | 10 | 117,688,905 | 117,710,716 | 21,811 -  | 1 |
| GenelD:215449   | Rap1b         | 10 | 117,814,597 | 117,845,974 | 31,377 -  | 1 |
| GenelD:69181    | Dyrk2         | 10 | 118,859,349 | 118,868,903 | 9,554 -   | 1 |
| GenelD:71902    | Cand1         | 10 | 119,198,812 | 119,240,055 | 41,243 -  | 1 |
| GenelD:73914    | Irak3         | 10 | 120,141,654 | 120,201,537 | 59,883 -  | 1 |
| GenelD:68212    | Tmbim4        | 10 | 120,208,826 | 120,224,897 | 16,071 +  | 2 |
| GenelD:66225    | Llph          | 10 | 120,227,060 | 120,232,070 | 5,010 +   | 1 |
| GenelD:15364    | Hmga2         | 10 | 120,361,275 | 120,476,935 | 115,660 - | 1 |

|                 |               |    |             |             |           |   |
|-----------------|---------------|----|-------------|-------------|-----------|---|
| GenelD:380664   | Lemd3         | 10 | 120,923,411 | 120,979,330 | 55,919 -  | 1 |
| GenelD:75612    | Gns           | 10 | 121,365,090 | 121,397,245 | 32,155 +  | 1 |
| GenelD:192678   | Rassf3        | 10 | 121,410,350 | 121,476,250 | 65,900 -  | 1 |
| GenelD:73192    | Xpot          | 10 | 121,587,380 | 121,626,316 | 38,936 -  | 1 |
| GenelD:270802   | BC048403      | 10 | 121,739,937 | 121,752,859 | 12,922 +  | 1 |
| GenelD:216395   | Tmem5         | 10 | 122,081,260 | 122,097,102 | 15,842 -  | 1 |
| GenelD:387251   | Mirlet7i      | 10 | 122,985,640 | 122,985,724 | 84 -      | 1 |
| GenelD:67074    | Mon2          | 10 | 122,992,061 | 123,076,505 | 84,444 -  | 2 |
| GenelD:14479    | Usp15         | 10 | 123,113,244 | 123,196,923 | 83,679 -  | 1 |
| GenelD:10004295 | Gm4129        | 10 | 123,199,084 | 123,199,581 | 497 +     | 1 |
| GenelD:268354   | Fam19a2       | 10 | 123,264,076 | 123,741,204 | 477,128 + | 1 |
| GenelD:320398   | Lrig3         | 10 | 125,966,219 | 126,015,359 | 49,140 +  | 1 |
| GenelD:52468    | Ctdsp2        | 10 | 126,978,717 | 126,999,975 | 21,258 +  | 2 |
| GenelD:11567    | Avil          | 10 | 127,000,709 | 127,020,994 | 20,285 +  | 1 |
| GenelD:66399    | Tsfm          | 10 | 127,022,332 | 127,030,814 | 8,482 -   | 1 |
| GenelD:10050460 | LOC100504608  | 10 | 127,032,905 | 127,041,394 | 8,489 -   | 2 |
| GenelD:17299    | Mettl1        | 10 | 127,041,932 | 127,045,461 | 3,529 +   | 1 |
| GenelD:13115    | Cyp27b1       | 10 | 127,048,246 | 127,053,006 | 4,760 +   | 1 |
| GenelD:216438   | March9        | 10 | 127,056,050 | 127,060,184 | 4,134 -   | 1 |
| GenelD:12567    | Cdk4          | 10 | 127,063,603 | 127,067,283 | 3,680 +   | 1 |
| GenelD:67125    | Tspan31       | 10 | 127,067,290 | 127,070,261 | 2,971 -   | 1 |
| GenelD:10050470 | A730063M14Rik | 10 | 127,070,481 | 127,071,101 | 620 +     | 1 |
| GenelD:216440   | Os9           | 10 | 127,094,259 | 127,121,160 | 26,901 -  | 1 |
| GenelD:14421    | B4galnt1      | 10 | 127,165,156 | 127,172,340 | 7,184 +   | 1 |
| GenelD:216441   | Slc26a10      | 10 | 127,172,426 | 127,180,645 | 8,219 -   | 2 |
| GenelD:52666    | Arhgef25      | 10 | 127,182,521 | 127,190,054 | 7,533 -   | 2 |
| GenelD:80904    | Dtx3          | 10 | 127,190,378 | 127,195,709 | 5,331 -   | 2 |
| GenelD:10003859 | F420014N23Rik | 10 | 127,195,249 | 127,202,643 | 7,394 +   | 2 |
| GenelD:117150   | Pip4k2c       | 10 | 127,197,067 | 127,211,622 | 14,555 -  | 2 |
| GenelD:216443   | Mars          | 10 | 127,296,221 | 127,311,786 | 15,565 -  | 1 |
| GenelD:14632    | Gli1          | 10 | 127,329,882 | 127,341,579 | 11,697 -  | 1 |
| GenelD:16326    | Inhbe         | 10 | 127,349,402 | 127,351,772 | 2,370 -   | 1 |
| GenelD:407790   | Ndufa4l2      | 10 | 127,514,939 | 127,517,154 | 2,215 +   | 1 |
| GenelD:108037   | Shmt2         | 10 | 127,517,123 | 127,522,444 | 5,321 -   | 1 |
| GenelD:104080   | Nxph4         | 10 | 127,525,473 | 127,534,559 | 9,086 -   | 1 |
| GenelD:20852    | Stat6         | 10 | 127,642,986 | 127,660,987 | 18,001 +  | 4 |
| GenelD:17937    | Nab2          | 10 | 127,660,918 | 127,666,703 | 5,785 -   | 3 |
| GenelD:72243    | 1700012D01Rik | 10 | 127,667,123 | 127,668,851 | 1,728 +   | 4 |
| GenelD:210035   | Tmem194       | 10 | 127,677,065 | 127,701,047 | 23,982 +  | 2 |
| GenelD:320080   | Zbtb39        | 10 | 127,739,538 | 127,747,349 | 7,811 +   | 1 |
| GenelD:11536    | Gpr182        | 10 | 127,749,602 | 127,751,798 | 2,196 -   | 1 |
| GenelD:19075    | Prim1         | 10 | 128,015,215 | 128,030,030 | 14,815 +  | 1 |
| GenelD:17938    | Naca          | 10 | 128,035,346 | 128,048,637 | 13,291 +  | 2 |
| GenelD:56351    | Ptges3        | 10 | 128,058,982 | 128,077,254 | 18,272 +  | 2 |
| GenelD:11947    | Atp5b         | 10 | 128,083,307 | 128,090,388 | 7,081 +   | 3 |
| GenelD:751518   | Mir677        | 10 | 128,085,286 | 128,085,363 | 77 +      | 2 |
| GenelD:116848   | Baz2a         | 10 | 128,092,783 | 128,129,303 | 36,520 +  | 3 |



|               |               |    |             |             |           |   |
|---------------|---------------|----|-------------|-------------|-----------|---|
| GenelD:216456 | Gls2          | 10 | 128,194,635 | 128,210,004 | 15,369 +  | 1 |
| GenelD:17339  | Mip           | 10 | 128,225,838 | 128,231,811 | 5,973 +   | 1 |
| GenelD:21853  | Timeless      | 10 | 128,232,063 | 128,252,941 | 20,878 +  | 1 |
| GenelD:12974  | Cs            | 10 | 128,337,832 | 128,362,479 | 24,647 +  | 2 |
| GenelD:210582 | Coq10a        | 10 | 128,363,097 | 128,370,037 | 6,940 -   | 2 |
| GenelD:237615 | Ankrd52       | 10 | 128,377,124 | 128,394,006 | 16,882 +  | 2 |
| GenelD:68094  | Smarcc2       | 10 | 128,459,236 | 128,490,174 | 30,938 +  | 1 |
| GenelD:23943  | Esyt1         | 10 | 128,510,248 | 128,525,859 | 15,611 -  | 1 |
| GenelD:13139  | Dgka          | 10 | 128,720,134 | 128,744,056 | 23,922 -  | 1 |
| GenelD:78428  | Wibg          | 10 | 128,747,879 | 128,766,568 | 18,689 +  | 1 |
| GenelD:58223  | Mmp19         | 10 | 128,790,910 | 128,800,824 | 9,914 +   | 1 |
| GenelD:73827  | Tmem198b      | 10 | 128,800,036 | 128,804,370 | 4,334 -   | 1 |
| GenelD:74330  | Dnajc14       | 10 | 128,805,676 | 128,819,446 | 13,770 +  | 1 |
| GenelD:12512  | Cd63          | 10 | 128,908,919 | 128,912,822 | 3,903 +   | 2 |
| GenelD:19682  | Rdh5          | 10 | 128,913,590 | 128,919,297 | 5,707 -   | 2 |
| GenelD:14533  | Bloc1s1       | 10 | 128,919,914 | 128,923,524 | 3,610 -   | 2 |
| GenelD:16404  | Itga7         | 10 | 128,933,813 | 128,958,286 | 24,473 +  | 1 |
| GenelD:13494  | Drg1          | 11 | 3,249,922   | 3,266,386   | 16,464 -  | 1 |
| GenelD:56218  | Patz1         | 11 | 3,289,131   | 3,309,083   | 19,952 +  | 1 |
| GenelD:791413 | Gm12592       | 11 | 3,304,830   | 3,331,178   | 26,348 -  | 1 |
| GenelD:216505 | Pik3ip1       | 11 | 3,330,731   | 3,342,971   | 12,240 +  | 1 |
| GenelD:16886  | Limk2         | 11 | 3,343,297   | 3,409,235   | 65,938 -  | 1 |
| GenelD:193670 | Rnf185        | 11 | 3,415,983   | 3,452,325   | 36,342 -  | 1 |
| GenelD:544752 | Tug1          | 11 | 3,639,794   | 3,648,808   | 9,014 -   | 1 |
| GenelD:74522  | Morc2a        | 11 | 3,649,494   | 3,690,372   | 40,878 +  | 1 |
| GenelD:216516 | Ccdc157       | 11 | 4,141,123   | 4,160,293   | 19,170 -  | 1 |
| GenelD:67465  | Sf3a1         | 11 | 4,160,354   | 4,182,541   | 22,187 +  | 1 |
| GenelD:103724 | Tbc1d10a      | 11 | 4,186,833   | 4,215,505   | 28,672 +  | 1 |
| GenelD:71962  | Gatsl3        | 11 | 4,218,251   | 4,222,409   | 4,158 +   | 1 |
| GenelD:74302  | Mtmr3         | 11 | 4,480,868   | 4,594,815   | 113,947 - | 1 |
| GenelD:78926  | Gas2l1        | 11 | 5,054,131   | 5,065,327   | 11,196 -  | 3 |
| GenelD:75668  | Rasl10a       | 11 | 5,058,128   | 5,060,383   | 2,255 +   | 3 |
| GenelD:14030  | Ewsr1         | 11 | 5,069,688   | 5,099,077   | 29,389 -  | 3 |
| GenelD:279766 | Rhbdd3        | 11 | 5,099,438   | 5,106,091   | 6,653 +   | 1 |
| GenelD:140703 | Emid1         | 11 | 5,106,266   | 5,152,222   | 45,956 -  | 1 |
| GenelD:84035  | Kremen1       | 11 | 5,191,552   | 5,261,610   | 70,058 -  | 2 |
| GenelD:407821 | Znrf3         | 11 | 5,276,329   | 5,444,847   | 168,518 - | 1 |
| GenelD:22433  | Xbp1          | 11 | 5,520,967   | 5,525,872   | 4,905 +   | 1 |
| GenelD:104479 | Ccdc117       | 11 | 5,528,887   | 5,542,217   | 13,330 -  | 2 |
| GenelD:64660  | Mrps24        | 11 | 5,703,983   | 5,707,699   | 3,716 -   | 1 |
| GenelD:72046  | Urgcp         | 11 | 5,713,417   | 5,762,376   | 48,959 -  | 3 |
| GenelD:76508  | 2210015D19Rik | 11 | 5,762,150   | 5,784,710   | 22,560 +  | 2 |
| GenelD:13169  | Dbnl          | 11 | 5,788,483   | 5,800,980   | 12,497 +  | 1 |
| GenelD:11568  | Aebp1         | 11 | 5,861,866   | 5,872,225   | 10,359 +  | 1 |
| GenelD:18972  | Pold2         | 11 | 5,872,180   | 5,878,256   | 6,076 -   | 1 |
| GenelD:103988 | Gck           | 11 | 5,900,823   | 5,949,599   | 48,776 -  | 1 |
| GenelD:56418  | Ykt6          | 11 | 5,955,758   | 5,967,780   | 12,022 +  | 1 |

|                 |               |    |            |            |           |   |
|-----------------|---------------|----|------------|------------|-----------|---|
| GenelD:209586   | Nudcd3        | 11 | 6,105,691  | 6,200,451  | 94,760 -  | 1 |
| GenelD:52513    | Ddx56         | 11 | 6,257,545  | 6,267,729  | 10,184 -  | 1 |
| GenelD:103694   | Tmed4         | 11 | 6,270,714  | 6,274,837  | 4,123 -   | 1 |
| GenelD:18293    | Ogdh          | 11 | 6,291,597  | 6,359,094  | 67,497 +  | 1 |
| GenelD:52915    | Zmiz2         | 11 | 6,389,364  | 6,406,162  | 16,798 +  | 2 |
| GenelD:268373   | Ppia          | 11 | 6,415,870  | 6,419,810  | 3,940 +   | 1 |
| GenelD:19291    | Purb          | 11 | 6,467,599  | 6,476,076  | 8,477 -   | 1 |
| GenelD:246177   | Myo1g         | 11 | 6,506,548  | 6,520,958  | 14,410 -  | 1 |
| GenelD:10004128 | Gm11974       | 11 | 6,525,591  | 6,528,760  | 3,169 -   | 1 |
| GenelD:216527   | Ccm2          | 11 | 6,546,887  | 6,596,761  | 49,874 +  | 1 |
| GenelD:21379    | Tbrg4         | 11 | 6,615,598  | 6,626,067  | 10,469 -  | 1 |
| GenelD:10021746 | Snora5c       | 11 | 6,620,319  | 6,620,419  | 100 -     | 1 |
| GenelD:22373    | Wap           | 11 | 6,635,483  | 6,638,649  | 3,166 -   | 1 |
| GenelD:16009    | Igfbp3        | 11 | 7,206,086  | 7,213,923  | 7,837 -   | 1 |
| GenelD:319939   | Tns3          | 11 | 8,431,652  | 8,664,535  | 232,883 - | 2 |
| GenelD:15574    | Hus1          | 11 | 8,993,142  | 9,011,137  | 17,995 -  | 1 |
| GenelD:194974   | Sun3          | 11 | 9,016,054  | 9,048,991  | 32,937 -  | 1 |
| GenelD:60530    | Fignl1        | 11 | 11,800,288 | 11,808,962 | 8,674 -   | 1 |
| GenelD:13195    | Ddc           | 11 | 11,814,101 | 11,898,144 | 84,043 -  | 1 |
| GenelD:14783    | Grb10         | 11 | 11,930,499 | 12,037,420 | 106,921 - | 1 |
| GenelD:13649    | Egfr          | 11 | 16,752,203 | 16,913,907 | 161,704 + | 1 |
| GenelD:72735    | 2810442I21Rik | 11 | 16,936,723 | 16,951,093 | 14,370 -  | 1 |
| GenelD:319701   | Fbxo48        | 11 | 16,951,410 | 16,954,772 | 3,362 +   | 1 |
| GenelD:68145    | Etaa1         | 11 | 17,938,749 | 17,953,875 | 15,126 -  | 1 |
| GenelD:17268    | Meis1         | 11 | 18,880,428 | 19,018,969 | 138,541 - | 2 |
| GenelD:10105565 | LOC101055656  | 11 | 19,009,128 | 19,011,183 | 2,055 +   | 2 |
| GenelD:114716   | Spred2        | 11 | 19,924,442 | 20,022,597 | 98,155 +  | 1 |
| GenelD:66713    | Actr2         | 11 | 20,062,304 | 20,112,951 | 50,647 -  | 1 |
| GenelD:19324    | Rab1          | 11 | 20,201,602 | 20,226,856 | 25,254 +  | 1 |
| GenelD:216543   | Cep68         | 11 | 20,227,037 | 20,249,424 | 22,387 -  | 1 |
| GenelD:55963    | Slc1a4        | 11 | 20,302,180 | 20,332,713 | 30,533 -  | 1 |
| GenelD:58172    | Sertad2       | 11 | 20,543,253 | 20,653,023 | 109,770 + | 2 |
| GenelD:216549   | Aftph         | 11 | 20,685,084 | 20,741,548 | 56,464 -  | 1 |
| GenelD:67245    | Peli1         | 11 | 21,091,324 | 21,150,327 | 59,003 +  | 1 |
| GenelD:216558   | Ugp2          | 11 | 21,321,138 | 21,370,879 | 49,741 -  | 1 |
| GenelD:216565   | Ehbp1         | 11 | 22,005,825 | 22,286,795 | 280,970 - | 1 |
| GenelD:103765   | Tmem17        | 11 | 22,512,283 | 22,519,231 | 6,948 +   | 1 |
| GenelD:53625    | B3gnt2        | 11 | 22,834,739 | 22,860,336 | 25,597 -  | 1 |
| GenelD:17846    | Commd1        | 11 | 22,899,728 | 22,982,284 | 82,556 -  | 2 |
| GenelD:22183    | Zrsr1         | 11 | 22,972,005 | 22,976,496 | 4,491 +   | 1 |
| GenelD:12464    | Cct4          | 11 | 22,990,593 | 23,003,336 | 12,743 +  | 1 |
| GenelD:103573   | Xpo1          | 11 | 23,256,041 | 23,297,597 | 41,556 +  | 1 |
| GenelD:17847    | Usp34         | 11 | 23,306,895 | 23,490,560 | 183,665 + | 1 |
| GenelD:268390   | Ahsa2         | 11 | 23,487,882 | 23,497,946 | 10,064 -  | 1 |
| GenelD:19696    | Rel           | 11 | 23,741,729 | 23,770,970 | 29,241 -  | 1 |
| GenelD:216578   | Papolg        | 11 | 23,862,646 | 23,895,270 | 32,624 -  | 1 |
| GenelD:268391   | A830031A19Rik | 11 | 24,048,955 | 24,075,054 | 26,099 -  | 1 |

|                 |               |    |            |            |           |   |
|-----------------|---------------|----|------------|------------|-----------|---|
| GenelD:14025    | Bcl11a        | 11 | 24,078,056 | 24,173,558 | 95,502 +  | 1 |
| GenelD:71701    | Pnpt1         | 11 | 29,130,751 | 29,161,828 | 31,077 +  | 2 |
| GenelD:320757   | A630052C17Rik | 11 | 29,170,809 | 29,173,552 | 2,743 -   | 1 |
| GenelD:104570   | Smek2         | 11 | 29,172,907 | 29,220,797 | 47,890 +  | 1 |
| GenelD:108686   | Ccdc88a       | 11 | 29,373,775 | 29,510,812 | 137,037 + | 1 |
| GenelD:76784    | Mtif2         | 11 | 29,526,457 | 29,545,255 | 18,798 +  | 1 |
| GenelD:78294    | Rps27a        | 11 | 29,545,842 | 29,548,040 | 2,198 -   | 1 |
| GenelD:73324    | 1700034F02Rik | 11 | 29,547,950 | 29,578,352 | 30,402 +  | 1 |
| GenelD:68585    | Rtn4          | 11 | 29,692,898 | 29,744,414 | 51,516 +  | 1 |
| GenelD:10105573 | LOC101055730  | 11 | 29,695,511 | 29,696,704 | 1,193 +   | 1 |
| GenelD:666427   | Gm8098        | 11 | 30,231,059 | 30,268,659 | 37,600 +  | 1 |
| GenelD:75572    | Acyp2         | 11 | 30,505,992 | 30,649,396 | 143,404 - | 1 |
| GenelD:103554   | Psme4         | 11 | 30,771,775 | 30,880,361 | 108,586 + | 1 |
| GenelD:20856    | Stc2          | 11 | 31,359,441 | 31,370,061 | 10,620 -  | 1 |
| GenelD:16199    | Il9r          | 11 | 32,188,997 | 32,200,279 | 11,282 -  | 1 |
| GenelD:78372    | Snrnp25       | 11 | 32,205,415 | 32,208,996 | 3,581 +   | 1 |
| GenelD:13650    | Rhbdf1        | 11 | 32,209,585 | 32,222,293 | 12,708 -  | 3 |
| GenelD:268395   | Mpg           | 11 | 32,226,505 | 32,232,702 | 6,197 +   | 2 |
| GenelD:17168    | Nprl3         | 11 | 32,232,419 | 32,267,614 | 35,195 -  | 2 |
| GenelD:15126    | Hba-x         | 11 | 32,276,600 | 32,278,116 | 1,516 +   | 1 |
| GenelD:327900   | Ubt2          | 11 | 32,455,372 | 32,518,709 | 63,337 +  | 1 |
| GenelD:69306    | Efcab9        | 11 | 32,522,733 | 32,527,574 | 4,841 -   | 1 |
| GenelD:20868    | Stk10         | 11 | 32,533,266 | 32,624,595 | 91,329 +  | 1 |
| GenelD:14172    | Fgf18         | 11 | 33,117,430 | 33,147,400 | 29,970 -  | 1 |
| GenelD:18148    | Npm1          | 11 | 33,152,498 | 33,163,206 | 10,708 -  | 2 |
| GenelD:27140    | Tlx3          | 11 | 33,200,752 | 33,203,588 | 2,836 -   | 2 |
| GenelD:66011    | Ranbp17       | 11 | 33,211,794 | 33,513,746 | 301,952 - | 1 |
| GenelD:70385    | Spdl1         | 11 | 34,809,185 | 34,833,641 | 24,456 -  | 1 |
| GenelD:211347   | Pank3         | 11 | 35,769,495 | 35,791,285 | 21,790 +  | 1 |
| GenelD:104458   | Rars          | 11 | 35,808,381 | 35,834,528 | 26,147 -  | 1 |
| GenelD:211652   | Wwc1          | 11 | 35,839,178 | 35,980,089 | 140,911 - | 2 |
| GenelD:23964    | Tenm2         | 11 | 36,006,669 | 36,944,243 | 937,574 - | 1 |
| GenelD:108645   | Mat2b         | 11 | 40,679,314 | 40,695,203 | 15,889 -  | 1 |
| GenelD:15366    | Hmmr          | 11 | 40,701,388 | 40,733,437 | 32,049 -  | 2 |
| GenelD:52653    | Nudcd2        | 11 | 40,733,642 | 40,740,046 | 6,404 +   | 1 |
| GenelD:30939    | Pttg1         | 11 | 43,420,248 | 43,426,248 | 6,000 -   | 1 |
| GenelD:193116   | Slu7          | 11 | 43,433,731 | 43,447,981 | 14,250 +  | 1 |
| GenelD:380694   | Ccnjl         | 11 | 43,528,784 | 43,586,997 | 58,213 +  | 1 |
| GenelD:79560    | Ublcp1        | 11 | 44,454,571 | 44,470,548 | 15,977 -  | 1 |
| GenelD:74315    | Rnf145        | 11 | 44,518,964 | 44,565,520 | 46,556 +  | 1 |
| GenelD:13591    | Ebf1          | 11 | 44,618,134 | 45,005,175 | 387,041 + | 1 |
| GenelD:10000966 | F630206G17Rik | 11 | 45,808,083 | 45,842,880 | 34,797 +  | 1 |
| GenelD:216705   | Clint1        | 11 | 45,851,964 | 45,910,625 | 58,661 +  | 1 |
| GenelD:72290    | Lsm11         | 11 | 45,928,269 | 45,944,935 | 16,666 -  | 1 |
| GenelD:66628    | Thg1l         | 11 | 45,948,154 | 45,955,494 | 7,340 -   | 1 |
| GenelD:76884    | Cyfp2         | 11 | 46,193,849 | 46,312,859 | 119,010 - | 1 |
| GenelD:66213    | Med7          | 11 | 46,436,947 | 46,442,721 | 5,774 +   | 1 |

|                 |               |    |            |            |           |   |
|-----------------|---------------|----|------------|------------|-----------|---|
| GenelD:14694    | Gnb211        | 11 | 48,800,360 | 48,806,241 | 5,881 +   | 1 |
| GenelD:10021653 | Snord96a      | 11 | 48,802,033 | 48,802,109 | 76 +      | 1 |
| GenelD:10021654 | Snord95       | 11 | 48,803,139 | 48,803,206 | 67 +      | 1 |
| GenelD:211007   | Trim41        | 11 | 48,806,404 | 48,817,391 | 10,987 -  | 1 |
| GenelD:94089    | Trim7         | 11 | 48,826,138 | 48,850,195 | 24,057 +  | 1 |
| GenelD:10086185 | Gm16170       | 11 | 48,843,648 | 48,853,493 | 9,845 -   | 1 |
| GenelD:258273   | Olfr1394      | 11 | 49,160,016 | 49,160,954 | 938 +     | 1 |
| GenelD:237754   | Btnl9         | 11 | 49,168,325 | 49,187,089 | 18,764 -  | 1 |
| GenelD:22720    | Zfp62         | 11 | 49,203,500 | 49,218,816 | 15,316 +  | 1 |
| GenelD:104625   | Cnot6         | 11 | 49,674,698 | 49,712,710 | 38,012 -  | 1 |
| GenelD:14584    | Gfpt2         | 11 | 49,794,155 | 49,838,620 | 44,465 +  | 2 |
| GenelD:26420    | Mapk9         | 11 | 49,846,751 | 49,886,421 | 39,670 +  | 1 |
| GenelD:76795    | Tbc1d9b       | 11 | 50,131,360 | 50,172,785 | 41,425 +  | 1 |
| GenelD:68067    | 3010026O09Rik | 11 | 50,174,851 | 50,200,115 | 25,264 +  | 1 |
| GenelD:18412    | Sqstm1        | 11 | 50,200,152 | 50,210,790 | 10,638 -  | 1 |
| GenelD:103534   | Mgat4b        | 11 | 50,225,335 | 50,235,103 | 9,768 +   | 2 |
| GenelD:17001    | Ltc4s         | 11 | 50,236,472 | 50,238,471 | 1,999 -   | 2 |
| GenelD:103806   | Maml1         | 11 | 50,255,634 | 50,292,336 | 36,702 -  | 1 |
| GenelD:12330    | Canx          | 11 | 50,293,957 | 50,325,673 | 31,716 -  | 2 |
| GenelD:59013    | Hnrnph1       | 11 | 50,377,719 | 50,386,528 | 8,809 +   | 1 |
| GenelD:216725   | Adamts2       | 11 | 50,602,085 | 50,804,049 | 201,964 + | 1 |
| GenelD:193286   | BC049762      | 11 | 51,253,651 | 51,262,951 | 9,300 -   | 1 |
| GenelD:12750    | Clk4          | 11 | 51,263,171 | 51,281,764 | 18,593 +  | 1 |
| GenelD:72947    | Agxt2l2       | 11 | 51,584,757 | 51,603,269 | 18,512 +  | 1 |
| GenelD:15384    | Hnrnpab       | 11 | 51,600,100 | 51,606,881 | 6,781 -   | 1 |
| GenelD:52530    | Nhp2          | 11 | 51,619,773 | 51,623,714 | 3,941 +   | 1 |
| GenelD:66089    | Rmnd5b        | 11 | 51,623,673 | 51,635,896 | 12,223 -  | 2 |
| GenelD:212706   | N4bp3         | 11 | 51,643,089 | 51,651,073 | 7,984 -   | 2 |
| GenelD:97775    | D930048N14Rik | 11 | 51,650,954 | 51,657,681 | 6,727 +   | 1 |
| GenelD:77371    | Sec24a        | 11 | 51,692,263 | 51,756,834 | 64,571 -  | 1 |
| GenelD:66397    | Sar1b         | 11 | 51,763,663 | 51,791,953 | 28,290 +  | 1 |
| GenelD:76901    | Phf15         | 11 | 51,813,456 | 51,857,481 | 44,025 -  | 1 |
| GenelD:22210    | Ube2b         | 11 | 51,985,146 | 52,000,466 | 15,320 -  | 2 |
| GenelD:213084   | Cdkl3         | 11 | 52,004,221 | 52,084,667 | 80,446 +  | 2 |
| GenelD:19052    | Ppp2ca        | 11 | 52,098,824 | 52,122,749 | 23,925 +  | 1 |
| GenelD:21402    | Skp1a         | 11 | 52,231,995 | 52,246,858 | 14,863 +  | 1 |
| GenelD:10105619 | LOC101056192  | 11 | 52,233,724 | 52,236,645 | 2,921 +   | 1 |
| GenelD:21414    | Tcf7          | 11 | 52,252,604 | 52,282,571 | 29,967 -  | 1 |
| GenelD:399633   | A630014C17Rik | 11 | 52,276,055 | 52,286,183 | 10,128 +  | 1 |
| GenelD:22333    | Vdac1         | 11 | 52,361,115 | 52,389,396 | 28,281 +  | 1 |
| GenelD:320027   | Fstl4         | 11 | 52,764,706 | 53,187,347 | 422,641 + | 1 |
| GenelD:15525    | Hspa4         | 11 | 53,259,814 | 53,300,479 | 40,665 -  | 1 |
| GenelD:93736    | Aff4          | 11 | 53,350,767 | 53,421,830 | 71,063 +  | 1 |
| GenelD:10003849 | Gm10447       | 11 | 53,454,804 | 53,457,110 | 2,306 -   | 1 |
| GenelD:71774    | Shroom1       | 11 | 53,457,205 | 53,467,755 | 10,550 +  | 1 |
| GenelD:432561   | Gm9837        | 11 | 53,469,743 | 53,470,473 | 730 -     | 1 |
| GenelD:237761   | Sowaha        | 11 | 53,476,578 | 53,480,195 | 3,617 -   | 1 |

|                 |               |    |            |            |           |   |
|-----------------|---------------|----|------------|------------|-----------|---|
| GenelD:10050369 | Gm19835       | 11 | 53,482,411 | 53,487,375 | 4,964 -   | 1 |
| GenelD:319650   | A430108G06Rik | 11 | 53,564,668 | 53,567,313 | 2,645 -   | 1 |
| GenelD:16568    | Kif3a         | 11 | 53,567,379 | 53,604,244 | 36,865 +  | 1 |
| GenelD:19360    | Rad50         | 11 | 53,649,519 | 53,707,319 | 57,800 -  | 1 |
| GenelD:16362    | Irf1          | 11 | 53,770,014 | 53,778,374 | 8,360 +   | 1 |
| GenelD:56517    | Slc22a21      | 11 | 53,950,824 | 53,980,027 | 29,203 -  | 1 |
| GenelD:30805    | Slc22a4       | 11 | 53,983,126 | 54,028,090 | 44,964 -  | 1 |
| GenelD:216742   | Fnip1         | 11 | 54,438,179 | 54,518,241 | 80,062 +  | 1 |
| GenelD:72729    | Cdc42se2      | 11 | 54,717,415 | 54,787,703 | 70,288 -  | 1 |
| GenelD:75530    | Lym7          | 11 | 54,839,289 | 54,860,591 | 21,302 -  | 1 |
| GenelD:15254    | Hint1         | 11 | 54,866,438 | 54,870,496 | 4,058 +   | 1 |
| GenelD:57783    | Tnip1         | 11 | 54,910,787 | 54,962,940 | 52,153 -  | 1 |
| GenelD:11749    | Anxa6         | 11 | 54,978,962 | 55,033,471 | 54,509 -  | 1 |
| GenelD:14667    | Gm2a          | 11 | 55,097,985 | 55,113,029 | 15,044 +  | 1 |
| GenelD:74045    | 4921508A21Rik | 11 | 55,191,719 | 55,197,682 | 5,963 -   | 1 |
| GenelD:215335   | Slc36a1       | 11 | 55,204,340 | 55,236,330 | 31,990 +  | 1 |
| GenelD:67726    | Fam114a2      | 11 | 57,482,990 | 57,518,644 | 35,654 -  | 1 |
| GenelD:216760   | Mfap3         | 11 | 57,518,665 | 57,533,817 | 15,152 +  | 1 |
| GenelD:171212   | Galnt10       | 11 | 57,645,442 | 57,787,501 | 142,059 + | 1 |
| GenelD:71154    | 4933426K07Rik | 11 | 57,655,413 | 57,657,826 | 2,413 -   | 1 |
| GenelD:50724    | Sap30l        | 11 | 57,801,637 | 57,810,615 | 8,978 +   | 1 |
| GenelD:73158    | Larp1         | 11 | 58,009,064 | 58,062,034 | 52,970 +  | 1 |
| GenelD:216766   | Gemin5        | 11 | 58,120,001 | 58,168,539 | 48,538 -  | 1 |
| GenelD:216767   | Mrpl22        | 11 | 58,171,654 | 58,179,580 | 7,926 +   | 1 |
| GenelD:103836   | Zfp692        | 11 | 58,307,069 | 58,314,613 | 7,544 +   | 1 |
| GenelD:319475   | Zfp672        | 11 | 58,315,114 | 58,330,339 | 15,225 -  | 1 |
| GenelD:56631    | Trim17        | 11 | 58,963,781 | 58,971,729 | 7,948 +   | 1 |
| GenelD:75694    | 2310058D17Rik | 11 | 58,965,748 | 58,978,050 | 12,302 -  | 1 |
| GenelD:94091    | Trim11        | 11 | 58,978,116 | 58,991,458 | 13,342 +  | 1 |
| GenelD:118454   | Gjc2          | 11 | 59,175,564 | 59,183,213 | 7,649 -   | 2 |
| GenelD:14923    | Guk1          | 11 | 59,183,855 | 59,191,952 | 8,097 -   | 3 |
| GenelD:72203    | 2610507I01Rik | 11 | 59,197,793 | 59,202,431 | 4,638 -   | 4 |
| GenelD:67212    | Mrpl55        | 11 | 59,202,517 | 59,206,002 | 3,485 +   | 3 |
| GenelD:67862    | 2310033P09Rik | 11 | 59,208,361 | 59,210,736 | 2,375 +   | 3 |
| GenelD:11840    | Arf1          | 11 | 59,211,412 | 59,228,267 | 16,855 -  | 4 |
| GenelD:268417   | Zkscan17      | 11 | 59,485,521 | 59,506,640 | 21,119 -  | 1 |
| GenelD:74476    | 4933439C10Rik | 11 | 59,505,685 | 59,511,067 | 5,382 +   | 1 |
| GenelD:26936    | Mprip         | 11 | 59,662,495 | 59,780,860 | 118,365 + | 1 |
| GenelD:26572    | Cops3         | 11 | 59,817,804 | 59,839,767 | 21,963 -  | 2 |
| GenelD:103850   | Nt5m          | 11 | 59,848,073 | 59,876,533 | 28,460 +  | 2 |
| GenelD:192191   | Med9          | 11 | 59,948,214 | 59,963,306 | 15,092 +  | 1 |
| GenelD:19416    | Rasd1         | 11 | 59,963,181 | 59,964,942 | 1,761 -   | 1 |
| GenelD:18618    | Pemt          | 11 | 59,970,617 | 60,036,839 | 66,222 -  | 1 |
| GenelD:19377    | Rai1          | 11 | 60,105,013 | 60,199,195 | 94,182 +  | 4 |
| GenelD:10050414 | 4930412M03Rik | 11 | 60,112,219 | 60,115,212 | 2,993 -   | 1 |
| GenelD:20787    | Sreb1         | 11 | 60,199,089 | 60,220,604 | 21,515 -  | 1 |
| GenelD:246782   | Atpaf2        | 11 | 60,400,624 | 60,417,099 | 16,475 -  | 1 |

|                 |               |    |            |            |           |   |
|-----------------|---------------|----|------------|------------|-----------|---|
| GenelD:66771    | Gid4          | 11 | 60,417,145 | 60,445,277 | 28,132 +  | 1 |
| GenelD:17910    | Myo15         | 11 | 60,469,339 | 60,528,369 | 59,030 +  | 1 |
| GenelD:268420   | Alkbh5        | 11 | 60,537,683 | 60,558,512 | 20,829 +  | 1 |
| GenelD:16897    | Llgl1         | 11 | 60,699,690 | 60,714,188 | 14,498 +  | 1 |
| GenelD:14248    | Flii          | 11 | 60,714,149 | 60,727,221 | 13,072 -  | 1 |
| GenelD:237781   | Smcr7         | 11 | 60,728,398 | 60,732,951 | 4,553 +   | 1 |
| GenelD:10062862 | Mir5100       | 11 | 60,728,663 | 60,728,726 | 63 +      | 1 |
| GenelD:216821   | Tmem11        | 11 | 60,864,452 | 60,879,038 | 14,586 -  | 1 |
| GenelD:24083    | Gm16515       | 11 | 60,902,246 | 60,913,792 | 11,546 -  | 1 |
| GenelD:24082    | Gm16516       | 11 | 60,920,941 | 60,931,867 | 10,926 -  | 1 |
| GenelD:216825   | Usp22         | 11 | 61,151,781 | 61,175,059 | 23,278 -  | 1 |
| GenelD:11671    | Aldh3a2       | 11 | 61,244,755 | 61,267,127 | 22,372 -  | 1 |
| GenelD:380701   | Slc47a2       | 11 | 61,301,631 | 61,342,860 | 41,229 -  | 1 |
| GenelD:67473    | Slc47a1       | 11 | 61,343,400 | 61,378,075 | 34,675 -  | 1 |
| GenelD:626150   | Gm12271       | 11 | 61,416,402 | 61,416,815 | 413 -     | 1 |
| GenelD:76293    | Mfap4         | 11 | 61,485,444 | 61,488,704 | 3,260 +   | 1 |
| GenelD:23939    | Mapk7         | 11 | 61,488,812 | 61,494,213 | 5,401 -   | 1 |
| GenelD:73216    | 3110043A19Rik | 11 | 61,504,381 | 61,505,059 | 678 -     | 2 |
| GenelD:27078    | B9d1          | 11 | 61,505,172 | 61,512,927 | 7,755 +   | 1 |
| GenelD:13855    | Epn2          | 11 | 61,517,249 | 61,579,687 | 62,438 -  | 1 |
| GenelD:29869    | Ulk2          | 11 | 61,775,598 | 61,855,092 | 79,494 -  | 1 |
| GenelD:56697    | Akap10        | 11 | 61,871,307 | 61,930,226 | 58,919 -  | 1 |
| GenelD:10105568 | LOC101055684  | 11 | 61,956,810 | 62,045,484 | 88,674 +  | 1 |
| GenelD:432572   | Specc1        | 11 | 62,077,097 | 62,223,013 | 145,916 + | 1 |
| GenelD:11541    | Adora2b       | 11 | 62,248,984 | 62,266,452 | 17,468 +  | 1 |
| GenelD:20185    | Ncor1         | 11 | 62,316,426 | 62,457,332 | 140,906 - | 1 |
| GenelD:327942   | Pigl          | 11 | 62,458,460 | 62,513,900 | 55,440 +  | 1 |
| GenelD:10050329 | Gm12279       | 11 | 62,545,690 | 62,550,993 | 5,303 -   | 1 |
| GenelD:22187    | Ubb           | 11 | 62,551,504 | 62,553,212 | 1,708 +   | 1 |
| GenelD:22368    | Trpv2         | 11 | 62,574,486 | 62,600,305 | 25,819 +  | 1 |
| GenelD:69221    | 2410006H16Rik | 11 | 62,602,877 | 62,604,806 | 1,929 +   | 1 |
| GenelD:10021742 | Snord49b      | 11 | 62,603,086 | 62,603,148 | 62 +      | 1 |
| GenelD:10021745 | Snord49a      | 11 | 62,603,460 | 62,603,521 | 61 +      | 1 |
| GenelD:10021744 | Snord65       | 11 | 62,604,530 | 62,604,586 | 56 +      | 1 |
| GenelD:192976   | Fam211a       | 11 | 62,604,884 | 62,648,523 | 43,639 -  | 2 |
| GenelD:216829   | Mmgt2         | 11 | 62,648,664 | 62,666,359 | 17,695 +  | 1 |
| GenelD:213980   | Fbxw10        | 11 | 62,847,123 | 62,877,462 | 30,339 +  | 1 |
| GenelD:67510    | Tvp23b        | 11 | 62,879,490 | 62,895,184 | 15,694 +  | 1 |
| GenelD:18858    | Pmp22         | 11 | 63,131,510 | 63,159,546 | 28,036 +  | 1 |
| GenelD:54710    | Hs3st3b1      | 11 | 63,884,693 | 63,922,284 | 37,591 -  | 1 |
| GenelD:654805   | F930015N05Rik | 11 | 64,433,135 | 64,436,674 | 3,539 -   | 1 |
| GenelD:15478    | Hs3st3a1      | 11 | 64,435,332 | 64,522,835 | 87,503 +  | 1 |
| GenelD:26398    | Map2k4        | 11 | 65,688,244 | 65,788,297 | 100,053 - | 1 |
| GenelD:10105569 | LOC101055694  | 11 | 65,782,741 | 65,787,985 | 5,244 -   | 1 |
| GenelD:237806   | Dnahc9        | 11 | 65,831,324 | 66,168,551 | 337,227 - | 1 |
| GenelD:380702   | Shisa6        | 11 | 66,211,725 | 66,526,126 | 314,401 - | 1 |
| GenelD:77579    | Myh10         | 11 | 68,691,915 | 68,816,624 | 124,709 + | 1 |

|                 |               |    |            |            |           |   |
|-----------------|---------------|----|------------|------------|-----------|---|
| GenelD:320040   | Rnf222        | 11 | 68,888,553 | 68,895,015 | 6,462 +   | 1 |
| GenelD:19941    | Rpl26         | 11 | 68,901,566 | 68,904,534 | 2,968 +   | 1 |
| GenelD:68964    | Ctc1          | 11 | 69,015,911 | 69,036,473 | 20,562 +  | 1 |
| GenelD:20877    | Aurkb         | 11 | 69,045,643 | 69,051,662 | 6,019 +   | 2 |
| GenelD:71923    | 2310047M10Rik | 11 | 69,059,775 | 69,061,576 | 1,801 +   | 1 |
| GenelD:66910    | Tmem107       | 11 | 69,070,809 | 69,073,293 | 2,484 +   | 1 |
| GenelD:22318    | Vamp2         | 11 | 69,088,528 | 69,092,381 | 3,853 +   | 2 |
| GenelD:18626    | Per1          | 11 | 69,098,956 | 69,109,960 | 11,004 +  | 2 |
| GenelD:10003843 | 9130213A22Rik | 11 | 69,120,055 | 69,122,583 | 2,528 -   | 1 |
| GenelD:84653    | Hes7          | 11 | 69,120,453 | 69,123,259 | 2,806 +   | 1 |
| GenelD:23801    | Aloxe3        | 11 | 69,126,377 | 69,149,115 | 22,738 +  | 1 |
| GenelD:14919    | Gucy2e        | 11 | 69,218,117 | 69,237,022 | 18,905 -  | 1 |
| GenelD:216846   | Cntrob        | 11 | 69,299,496 | 69,323,873 | 24,377 -  | 1 |
| GenelD:245828   | Trappc1       | 11 | 69,323,986 | 69,325,793 | 1,807 +   | 1 |
| GenelD:16499    | Kcnab3        | 11 | 69,326,258 | 69,333,041 | 6,783 +   | 2 |
| GenelD:80515    | A030009H04Rik | 11 | 69,340,769 | 69,342,647 | 1,878 +   | 1 |
| GenelD:216848   | Chd3          | 11 | 69,344,351 | 69,369,391 | 25,040 -  | 2 |
| GenelD:327951   | Cyb5d1        | 11 | 69,393,616 | 69,395,346 | 1,730 -   | 1 |
| GenelD:78304    | Lsmd1         | 11 | 69,395,791 | 69,396,671 | 880 +     | 1 |
| GenelD:67020    | Tmem88        | 11 | 69,396,516 | 69,398,234 | 1,718 -   | 2 |
| GenelD:216850   | Kdm6b         | 11 | 69,398,508 | 69,413,675 | 15,167 -  | 2 |
| GenelD:327954   | Dnahc2        | 11 | 69,420,809 | 69,549,108 | 128,299 - | 1 |
| GenelD:13643    | Efnb3         | 11 | 69,554,092 | 69,560,237 | 6,145 -   | 1 |
| GenelD:216853   | Wrap53        | 11 | 69,561,754 | 69,579,324 | 17,570 -  | 1 |
| GenelD:11932    | Atp1b2        | 11 | 69,599,750 | 69,605,960 | 6,210 -   | 1 |
| GenelD:20415    | Shbg          | 11 | 69,614,816 | 69,617,905 | 3,089 -   | 1 |
| GenelD:69215    | Sat2          | 11 | 69,622,109 | 69,623,869 | 1,760 +   | 1 |
| GenelD:23879    | Fxr2          | 11 | 69,632,971 | 69,653,297 | 20,326 +  | 1 |
| GenelD:10031674 | Mir467f       | 11 | 69,635,400 | 69,635,519 | 119 -     | 1 |
| GenelD:24070    | Mpdu1         | 11 | 69,656,704 | 69,662,642 | 5,938 -   | 1 |
| GenelD:10031684 | Mir1934       | 11 | 69,663,043 | 69,663,125 | 82 +      | 1 |
| GenelD:12514    | Cd68          | 11 | 69,664,371 | 69,666,062 | 1,691 -   | 1 |
| GenelD:13681    | Eif4a1        | 11 | 69,666,936 | 69,672,423 | 5,487 -   | 2 |
| GenelD:80886    | Senp3         | 11 | 69,673,110 | 69,682,084 | 8,974 -   | 2 |
| GenelD:10050382 | 2010012P19Rik | 11 | 69,682,138 | 69,691,140 | 9,002 +   | 2 |
| GenelD:69583    | Tnfsf13       | 11 | 69,682,577 | 69,685,554 | 2,977 -   | 2 |
| GenelD:619441   | BC096441      | 11 | 69,682,577 | 69,696,098 | 13,521 -  | 2 |
| GenelD:21944    | Tnfsf12       | 11 | 69,686,240 | 69,696,098 | 9,858 -   | 1 |
| GenelD:20020    | Polr2a        | 11 | 69,734,410 | 69,758,223 | 23,813 -  | 1 |
| GenelD:56293    | Slc35g3       | 11 | 69,759,884 | 69,761,844 | 1,960 -   | 1 |
| GenelD:75580    | Zbtb4         | 11 | 69,765,912 | 69,784,026 | 18,114 +  | 1 |
| GenelD:11443    | Chrnbl        | 11 | 69,784,036 | 69,795,937 | 11,901 -  | 5 |
| GenelD:14166    | Fgf11         | 11 | 69,798,202 | 69,801,625 | 3,423 -   | 5 |
| GenelD:380705   | Tmem102       | 11 | 69,803,595 | 69,805,624 | 2,029 -   | 5 |
| GenelD:74341    | G630025P09Rik | 11 | 69,803,669 | 69,806,038 | 2,369 +   | 5 |
| GenelD:108803   | 4933402P03Rik | 11 | 69,816,566 | 69,818,440 | 1,874 -   | 1 |
| GenelD:74288    | Spem1         | 11 | 69,820,871 | 69,822,165 | 1,294 -   | 1 |

|                 |               |    |            |            |          |   |
|-----------------|---------------|----|------------|------------|----------|---|
| GenelD:216856   | Nlgn2         | 11 | 69,823,123 | 69,834,849 | 11,726 - | 1 |
| GenelD:10050336 | Tmem95        | 11 | 69,876,684 | 69,878,018 | 1,334 -  | 1 |
| GenelD:216858   | Kctd11        | 11 | 69,878,264 | 69,880,985 | 2,721 -  | 1 |
| GenelD:216859   | Acap1         | 11 | 69,881,567 | 69,895,539 | 13,972 - | 2 |
| GenelD:70419    | 2810408A11Rik | 11 | 69,897,358 | 69,900,986 | 3,628 -  | 1 |
| GenelD:216860   | Neurl4        | 11 | 69,901,878 | 69,913,822 | 11,944 + | 3 |
| GenelD:56310    | Gps2          | 11 | 69,914,192 | 69,916,591 | 2,399 +  | 2 |
| GenelD:276770   | Eif5a         | 11 | 69,916,712 | 69,921,958 | 5,246 -  | 2 |
| GenelD:54351    | Elp5          | 11 | 69,968,224 | 69,981,235 | 13,011 - | 1 |
| GenelD:67181    | Ctdnep1       | 11 | 69,981,168 | 69,990,601 | 9,433 +  | 3 |
| GenelD:56486    | Gabarap       | 11 | 69,991,370 | 69,994,949 | 3,579 +  | 3 |
| GenelD:78246    | Phf23         | 11 | 69,995,771 | 70,000,011 | 4,240 +  | 2 |
| GenelD:13543    | Dvl2          | 11 | 70,000,626 | 70,010,109 | 9,483 +  | 2 |
| GenelD:11370    | Acadvl        | 11 | 70,010,192 | 70,015,407 | 5,215 -  | 1 |
| GenelD:216867   | Slc16a11      | 11 | 70,213,910 | 70,216,414 | 2,504 +  | 1 |
| GenelD:69309    | Slc16a13      | 11 | 70,216,792 | 70,220,994 | 4,202 -  | 1 |
| GenelD:12029    | Bcl6b         | 11 | 70,224,127 | 70,229,798 | 5,671 -  | 2 |
| GenelD:751537   | Mir497        | 11 | 70,234,717 | 70,234,800 | 83 +     | 1 |
| GenelD:387190   | Mir195        | 11 | 70,235,042 | 70,235,135 | 93 +     | 1 |
| GenelD:104457   | 0610010K14Rik | 11 | 70,235,204 | 70,237,914 | 2,710 -  | 1 |
| GenelD:52898    | Rnasek        | 11 | 70,238,123 | 70,239,852 | 1,729 -  | 1 |
| GenelD:11684    | Alox12        | 11 | 70,241,455 | 70,255,341 | 13,886 - | 1 |
| GenelD:75273    | Pelp1         | 11 | 70,392,881 | 70,410,031 | 17,150 - | 1 |
| GenelD:216869   | Arrb2         | 11 | 70,432,653 | 70,440,674 | 8,021 +  | 1 |
| GenelD:75604    | Tm4sf5        | 11 | 70,505,274 | 70,511,183 | 5,909 +  | 1 |
| GenelD:327956   | Vmo1          | 11 | 70,513,516 | 70,514,616 | 1,100 -  | 1 |
| GenelD:216871   | Gltpd2        | 11 | 70,519,209 | 70,520,736 | 1,527 +  | 1 |
| GenelD:19175    | Psmb6         | 11 | 70,525,357 | 70,527,858 | 2,501 +  | 1 |
| GenelD:18806    | Pld2          | 11 | 70,540,164 | 70,558,110 | 17,946 + | 1 |
| GenelD:50932    | Mink1         | 11 | 70,562,881 | 70,614,482 | 51,601 + | 1 |
| GenelD:14723    | Gp1ba         | 11 | 70,639,122 | 70,642,058 | 2,936 +  | 1 |
| GenelD:67863    | Slc25a11      | 11 | 70,644,019 | 70,647,039 | 3,020 -  | 2 |
| GenelD:70510    | Rnf167        | 11 | 70,647,589 | 70,651,421 | 3,832 +  | 2 |
| GenelD:18643    | Pfn1          | 11 | 70,651,847 | 70,654,650 | 2,803 -  | 2 |
| GenelD:13808    | Eno3          | 11 | 70,657,213 | 70,662,513 | 5,300 +  | 1 |
| GenelD:216873   | Spag7         | 11 | 70,663,769 | 70,669,416 | 5,647 -  | 1 |
| GenelD:216874   | Camta2        | 11 | 70,669,463 | 70,688,105 | 18,642 - | 1 |
| GenelD:103844   | Inca1         | 11 | 70,688,361 | 70,700,155 | 11,794 - | 2 |
| GenelD:16562    | Kif1c         | 11 | 70,700,548 | 70,731,970 | 31,422 + | 1 |
| GenelD:193043   | Zfp3          | 11 | 70,764,447 | 70,772,928 | 8,481 +  | 1 |
| GenelD:54189    | Rabep1        | 11 | 70,844,763 | 70,943,105 | 98,342 + | 1 |
| GenelD:19069    | Nup88         | 11 | 70,943,071 | 70,969,973 | 26,902 - | 1 |
| GenelD:69723    | Rpain         | 11 | 70,970,200 | 70,977,933 | 7,733 +  | 2 |
| GenelD:12261    | C1qbp         | 11 | 70,977,846 | 70,983,026 | 5,180 -  | 2 |
| GenelD:216877   | Dhx33         | 11 | 70,984,091 | 71,004,432 | 20,341 - | 2 |
| GenelD:116891   | Derl2         | 11 | 71,007,445 | 71,019,263 | 11,818 - | 1 |
| GenelD:74477    | 4933427D14Rik | 11 | 72,154,097 | 72,203,371 | 49,274 - | 1 |



|                 |               |    |            |            |           |   |
|-----------------|---------------|----|------------|------------|-----------|---|
| GenelD:52700    | Txndc17       | 11 | 72,207,554 | 72,210,487 | 2,933 +   | 1 |
| GenelD:67279    | Med31         | 11 | 72,211,724 | 72,215,592 | 3,868 -   | 1 |
| GenelD:75304    | 4930563E22Rik | 11 | 72,215,138 | 72,218,450 | 3,312 +   | 1 |
| GenelD:276829   | Smtnl2        | 11 | 72,390,114 | 72,411,713 | 21,599 -  | 1 |
| GenelD:71522    | Ggt6          | 11 | 72,435,526 | 72,438,407 | 2,881 +   | 1 |
| GenelD:18432    | Mybbp1a       | 11 | 72,441,378 | 72,451,550 | 10,172 +  | 1 |
| GenelD:216892   | Spns2         | 11 | 72,451,638 | 72,489,904 | 38,266 -  | 2 |
| GenelD:77577    | Spns3         | 11 | 72,498,156 | 72,550,246 | 52,090 -  | 1 |
| GenelD:67128    | Ube2g1        | 11 | 72,607,261 | 72,686,481 | 79,220 +  | 1 |
| GenelD:192986   | Cyb5d2        | 11 | 72,777,232 | 72,795,839 | 18,607 -  | 1 |
| GenelD:195018   | Zzef1         | 11 | 72,796,226 | 72,927,120 | 130,894 + | 1 |
| GenelD:53313    | Atp2a3        | 11 | 72,961,169 | 72,993,043 | 31,874 +  | 1 |
| GenelD:18436    | P2rx1         | 11 | 72,999,145 | 73,015,197 | 16,052 +  | 1 |
| GenelD:55984    | Camkk1        | 11 | 73,019,008 | 73,042,073 | 23,065 +  | 2 |
| GenelD:66874    | 1200014J11Rik | 11 | 73,047,867 | 73,083,579 | 35,712 +  | 1 |
| GenelD:16407    | Itgae         | 11 | 73,090,595 | 73,147,449 | 56,854 +  | 1 |
| GenelD:14841    | Gsg2          | 11 | 73,135,484 | 73,138,294 | 2,810 -   | 1 |
| GenelD:94045    | P2rx5         | 11 | 73,160,530 | 73,172,687 | 12,157 +  | 1 |
| GenelD:66048    | Emc6          | 11 | 73,175,503 | 73,177,042 | 1,539 -   | 1 |
| GenelD:76281    | Tax1bp3       | 11 | 73,177,083 | 73,182,046 | 4,963 +   | 1 |
| GenelD:83429    | Ctns          | 11 | 73,183,133 | 73,199,019 | 15,886 -  | 1 |
| GenelD:432582   | E130309D14Rik | 11 | 74,619,605 | 74,641,516 | 21,911 +  | 2 |
| GenelD:74148    | Cluh          | 11 | 74,649,495 | 74,670,847 | 21,352 +  | 1 |
| GenelD:18472    | Pafah1b1      | 11 | 74,673,949 | 74,724,384 | 50,435 -  | 1 |
| GenelD:17428    | Mnt           | 11 | 74,830,924 | 74,845,725 | 14,801 +  | 3 |
| GenelD:97761    | Sgsm2         | 11 | 74,849,264 | 74,897,080 | 47,816 -  | 3 |
| GenelD:104662   | Tsr1          | 11 | 74,898,080 | 74,909,340 | 11,260 +  | 2 |
| GenelD:10021746 | Snord91a      | 11 | 74,905,446 | 74,905,505 | 59 +      | 2 |
| GenelD:27364    | Srr           | 11 | 74,906,359 | 74,925,798 | 19,439 -  | 3 |
| GenelD:103677   | Smg6          | 11 | 74,925,872 | 75,164,448 | 238,576 + | 3 |
| GenelD:15248    | Hic1          | 11 | 75,164,565 | 75,170,255 | 5,690 -   | 2 |
| GenelD:387208   | Mir212        | 11 | 75,173,388 | 75,173,478 | 90 +      | 2 |
| GenelD:387150   | Mir132        | 11 | 75,173,682 | 75,173,747 | 65 +      | 2 |
| GenelD:246257   | Ovca2         | 11 | 75,175,943 | 75,178,808 | 2,865 -   | 2 |
| GenelD:116905   | Dph1          | 11 | 75,177,643 | 75,190,483 | 12,840 -  | 3 |
| GenelD:237847   | Rtn4rl1       | 11 | 75,193,993 | 75,267,762 | 73,769 +  | 1 |
| GenelD:68275    | Rpa1          | 11 | 75,300,259 | 75,348,383 | 48,124 -  | 1 |
| GenelD:319822   | Smyd4         | 11 | 75,348,433 | 75,405,705 | 57,272 +  | 1 |
| GenelD:192652   | Wdr81         | 11 | 75,440,943 | 75,454,717 | 13,774 -  | 2 |
| GenelD:10004249 | Mir22hg       | 11 | 75,461,539 | 75,466,690 | 5,151 +   | 2 |
| GenelD:387141   | Mir22         | 11 | 75,463,716 | 75,463,810 | 94 +      | 2 |
| GenelD:380712   | Tlcd2         | 11 | 75,468,079 | 75,470,645 | 2,566 +   | 1 |
| GenelD:192159   | Prpf8         | 11 | 75,486,777 | 75,509,447 | 22,670 +  | 1 |
| GenelD:280408   | Rilp          | 11 | 75,510,094 | 75,513,168 | 3,074 +   | 1 |
| GenelD:380713   | Scarf1        | 11 | 75,513,541 | 75,526,580 | 13,039 +  | 2 |
| GenelD:215113   | Slc43a2       | 11 | 75,531,694 | 75,577,572 | 45,878 +  | 1 |
| GenelD:18738    | Pitpna        | 11 | 75,588,108 | 75,628,778 | 40,670 +  | 1 |

|                 |               |    |            |            |           |   |
|-----------------|---------------|----|------------|------------|-----------|---|
| GenelD:17913    | Myo1c         | 11 | 75,651,509 | 75,674,643 | 23,134 +  | 1 |
| GenelD:12928    | Crk           | 11 | 75,679,310 | 75,706,092 | 26,782 +  | 1 |
| GenelD:22627    | Ywhae         | 11 | 75,732,887 | 75,765,841 | 32,954 +  | 1 |
| GenelD:13447    | Doc2b         | 11 | 75,769,090 | 75,796,057 | 26,967 -  | 1 |
| GenelD:76566    | Fam101b       | 11 | 76,019,194 | 76,027,782 | 8,588 -   | 1 |
| GenelD:116972   | Fam57a        | 11 | 76,202,056 | 76,208,257 | 6,201 +   | 2 |
| GenelD:276919   | Gemin4        | 11 | 76,210,571 | 76,217,572 | 7,001 -   | 2 |
| GenelD:13168    | Dbil5         | 11 | 76,217,613 | 76,218,665 | 1,052 +   | 1 |
| GenelD:67201    | Glod4         | 11 | 76,220,395 | 76,243,699 | 23,304 -  | 1 |
| GenelD:18230    | Nxn           | 11 | 76,257,226 | 76,399,141 | 141,915 - | 1 |
| GenelD:56322    | Timm22        | 11 | 76,407,167 | 76,416,312 | 9,145 +   | 1 |
| GenelD:109934   | Abr           | 11 | 76,416,734 | 76,577,727 | 160,993 - | 3 |
| GenelD:12874    | Cpd           | 11 | 76,777,208 | 76,847,008 | 69,800 -  | 1 |
| GenelD:104184   | Blmh          | 11 | 76,945,656 | 76,987,389 | 41,733 +  | 1 |
| GenelD:237860   | Ssh2          | 11 | 77,216,425 | 77,460,220 | 243,795 + | 2 |
| GenelD:216961   | Coro6         | 11 | 77,463,913 | 77,469,501 | 5,588 +   | 1 |
| GenelD:268445   | Ankrd13b      | 11 | 77,470,487 | 77,489,678 | 19,191 -  | 2 |
| GenelD:216963   | Git1          | 11 | 77,493,412 | 77,507,774 | 14,362 +  | 3 |
| GenelD:216964   | Trp53i13      | 11 | 77,508,099 | 77,513,273 | 5,174 -   | 2 |
| GenelD:67477    | Abhd15        | 11 | 77,515,117 | 77,520,628 | 5,511 +   | 2 |
| GenelD:10105579 | LOC101055794  | 11 | 77,516,435 | 77,519,198 | 2,763 -   | 2 |
| GenelD:68564    | Nufip2        | 11 | 77,686,139 | 77,717,966 | 31,827 +  | 1 |
| GenelD:20370    | Sez6          | 11 | 77,930,943 | 77,979,048 | 48,105 +  | 1 |
| GenelD:268448   | Phf12         | 11 | 77,982,816 | 78,030,536 | 47,720 +  | 2 |
| GenelD:10050417 | A030003K02Rik | 11 | 78,030,006 | 78,032,665 | 2,659 -   | 1 |
| GenelD:70451    | Dhrs13        | 11 | 78,032,313 | 78,037,864 | 5,551 +   | 1 |
| GenelD:14252    | Flot2         | 11 | 78,037,941 | 78,060,432 | 22,491 +  | 1 |
| GenelD:216971   | Fam222b       | 11 | 78,094,673 | 78,157,339 | 62,666 +  | 1 |
| GenelD:22032    | Traf4         | 11 | 78,158,423 | 78,165,550 | 7,127 -   | 1 |
| GenelD:140859   | Nek8          | 11 | 78,166,106 | 78,176,666 | 10,560 -  | 2 |
| GenelD:68385    | Tlcd1         | 11 | 78,178,766 | 78,180,772 | 2,006 +   | 2 |
| GenelD:268449   | Rpl23a        | 11 | 78,180,935 | 78,183,584 | 2,649 -   | 2 |
| GenelD:10052907 | Snord42a      | 11 | 78,181,302 | 78,181,346 | 44 -      | 2 |
| GenelD:10021653 | Snord4a       | 11 | 78,181,687 | 78,181,756 | 69 -      | 2 |
| GenelD:10052907 | Snord42b      | 11 | 78,183,059 | 78,183,113 | 54 -      | 2 |
| GenelD:19376    | Rab34         | 11 | 78,188,427 | 78,192,193 | 3,766 +   | 2 |
| GenelD:216974   | Proca1        | 11 | 78,193,392 | 78,205,763 | 12,371 +  | 1 |
| GenelD:20926    | Supt6         | 11 | 78,206,749 | 78,245,703 | 38,954 -  | 1 |
| GenelD:20316    | Sdf2          | 11 | 78,245,746 | 78,255,496 | 9,750 +   | 2 |
| GenelD:72503    | 2610507B11Rik | 11 | 78,261,754 | 78,290,625 | 28,871 +  | 1 |
| GenelD:54141    | Spag5         | 11 | 78,301,591 | 78,322,454 | 20,863 +  | 1 |
| GenelD:11676    | Aldoc         | 11 | 78,324,198 | 78,326,760 | 2,562 +   | 1 |
| GenelD:276846   | Pigs          | 11 | 78,328,422 | 78,342,776 | 14,354 +  | 2 |
| GenelD:22248    | Unc119        | 11 | 78,343,522 | 78,349,156 | 5,634 +   | 1 |
| GenelD:52466    | Slc46a1       | 11 | 78,465,701 | 78,471,945 | 6,244 +   | 1 |
| GenelD:237868   | Sarm1         | 11 | 78,472,330 | 78,497,754 | 25,424 -  | 1 |
| GenelD:22370    | Vtn           | 11 | 78,499,120 | 78,502,325 | 3,205 +   | 1 |

|                 |               |    |            |            |           |   |
|-----------------|---------------|----|------------|------------|-----------|---|
| GenelD:18292    | Sebox         | 11 | 78,503,513 | 78,505,081 | 1,568 +   | 1 |
| GenelD:195040   | Tmem199       | 11 | 78,507,055 | 78,512,168 | 5,113 -   | 1 |
| GenelD:67811    | Poldip2       | 11 | 78,512,296 | 78,522,736 | 10,440 +  | 1 |
| GenelD:21927    | Tnfaip1       | 11 | 78,522,850 | 78,536,260 | 13,410 -  | 1 |
| GenelD:16706    | Ksr1          | 11 | 79,014,801 | 79,146,354 | 131,553 - | 1 |
| GenelD:78889    | Wsb1          | 11 | 79,239,382 | 79,254,695 | 15,313 -  | 1 |
| GenelD:18015    | Nf1           | 11 | 79,339,892 | 79,581,609 | 241,717 + | 1 |
| GenelD:268451   | Rab11fip4     | 11 | 79,591,212 | 79,694,012 | 102,800 + | 2 |
| GenelD:72218    | 4930542H20Rik | 11 | 79,670,373 | 79,675,086 | 4,713 -   | 1 |
| GenelD:387188   | Mir193        | 11 | 79,711,969 | 79,712,034 | 65 +      | 2 |
| GenelD:54394    | Crlf3         | 11 | 80,046,499 | 80,080,955 | 34,456 -  | 2 |
| GenelD:237877   | Atad5         | 11 | 80,089,400 | 80,135,791 | 46,391 +  | 2 |
| GenelD:71956    | Rnf135        | 11 | 80,183,872 | 80,199,753 | 15,881 +  | 1 |
| GenelD:59040    | Rhot1         | 11 | 80,209,055 | 80,267,907 | 58,852 +  | 1 |
| GenelD:246104   | Rhbdl3        | 11 | 80,300,912 | 80,355,986 | 55,074 +  | 1 |
| GenelD:70591    | 5730455P16Rik | 11 | 80,360,492 | 80,378,015 | 17,523 -  | 1 |
| GenelD:22680    | Zfp207        | 11 | 80,383,279 | 80,405,874 | 22,595 +  | 1 |
| GenelD:69077    | Psm11         | 11 | 80,428,615 | 80,472,133 | 43,518 +  | 2 |
| GenelD:12569    | Cdk5r1        | 11 | 80,477,046 | 80,481,179 | 4,133 +   | 1 |
| GenelD:338367   | Myo1d         | 11 | 80,482,127 | 80,780,025 | 297,898 - | 2 |
| GenelD:10050327 | Gm11423       | 11 | 82,779,601 | 82,781,042 | 1,441 -   | 1 |
| GenelD:16882    | Lig3          | 11 | 82,781,135 | 82,804,274 | 23,139 +  | 1 |
| GenelD:78919    | Fndc8         | 11 | 82,892,145 | 82,900,737 | 8,592 +   | 1 |
| GenelD:217011   | Nle1          | 11 | 82,900,768 | 82,908,395 | 7,627 -   | 1 |
| GenelD:217012   | Unc45b        | 11 | 82,911,253 | 82,943,406 | 32,153 +  | 2 |
| GenelD:613254   | AA465934      | 11 | 83,291,699 | 83,294,637 | 2,938 +   | 1 |
| GenelD:103729   | AI450353      | 11 | 83,293,430 | 83,294,929 | 1,499 +   | 1 |
| GenelD:10030273 | Snord7        | 11 | 83,294,304 | 83,294,399 | 95 +      | 1 |
| GenelD:103737   | Pex12         | 11 | 83,294,645 | 83,298,977 | 4,332 -   | 1 |
| GenelD:71770    | Ap2b1         | 11 | 83,302,697 | 83,405,035 | 102,338 + | 1 |
| GenelD:217038   | Mrm1          | 11 | 84,813,061 | 84,819,515 | 6,454 -   | 1 |
| GenelD:192970   | Dhrs11        | 11 | 84,820,728 | 84,829,003 | 8,275 -   | 1 |
| GenelD:74995    | 4930502E09Rik | 11 | 84,829,178 | 84,830,868 | 1,690 +   | 1 |
| GenelD:217039   | Ggnbp2        | 11 | 84,832,361 | 84,870,738 | 38,377 -  | 4 |
| GenelD:70325    | Pigw          | 11 | 84,876,313 | 84,880,285 | 3,972 -   | 3 |
| GenelD:66196    | Myo19         | 11 | 84,880,220 | 84,911,131 | 30,911 +  | 4 |
| GenelD:448850   | Znhit3        | 11 | 84,910,955 | 84,916,356 | 5,401 -   | 1 |
| GenelD:66884    | Appbp2        | 11 | 85,191,308 | 85,235,120 | 43,812 -  | 1 |
| GenelD:654810   | D630032N06Rik | 11 | 85,235,166 | 85,238,304 | 3,138 +   | 1 |
| GenelD:53892    | Ppm1d         | 11 | 85,311,254 | 85,347,071 | 35,817 +  | 1 |
| GenelD:192197   | Bcas3         | 11 | 85,353,164 | 85,826,058 | 472,894 + | 2 |
| GenelD:69909    | 2610027K06Rik | 11 | 85,795,578 | 85,832,388 | 36,810 -  | 4 |
| GenelD:21385    | Tbx2          | 11 | 85,832,615 | 85,841,948 | 9,333 +   | 4 |
| GenelD:237911   | Brip1         | 11 | 86,058,136 | 86,201,193 | 143,057 - | 1 |
| GenelD:70422    | Ints2         | 11 | 86,210,683 | 86,257,568 | 46,885 -  | 2 |
| GenelD:327987   | Med13         | 11 | 86,265,715 | 86,357,525 | 91,810 -  | 2 |
| GenelD:72508    | Rps6kb1       | 11 | 86,499,009 | 86,544,807 | 45,798 -  | 1 |

|               |               |    |            |            |           |   |
|---------------|---------------|----|------------|------------|-----------|---|
| GenelD:56427  | Tubd1         | 11 | 86,544,991 | 86,567,360 | 22,369 +  | 1 |
| GenelD:67300  | Cltc          | 11 | 86,694,653 | 86,757,492 | 62,839 -  | 1 |
| GenelD:77864  | Ypel2         | 11 | 86,936,425 | 86,993,762 | 57,337 -  | 1 |
| GenelD:74133  | Smg8          | 11 | 87,077,732 | 87,086,777 | 9,045 -   | 1 |
| GenelD:270906 | Prr11         | 11 | 87,089,156 | 87,108,714 | 19,558 -  | 2 |
| GenelD:66140  | Ska2          | 11 | 87,109,261 | 87,122,974 | 13,713 +  | 2 |
| GenelD:723834 | Mir301        | 11 | 87,113,004 | 87,113,089 | 85 +      | 1 |
| GenelD:68729  | Trim37        | 11 | 87,127,077 | 87,220,682 | 93,605 +  | 1 |
| GenelD:320472 | Ppm1e         | 11 | 87,226,906 | 87,358,994 | 132,088 - | 1 |
| GenelD:68097  | Dynll2        | 11 | 87,979,525 | 87,998,298 | 18,773 -  | 1 |
| GenelD:72087  | 2010015M23Rik | 11 | 88,039,580 | 88,047,561 | 7,981 -   | 1 |
| GenelD:110809 | Srsf1         | 11 | 88,047,671 | 88,053,757 | 6,086 +   | 1 |
| GenelD:22344  | Vezf1         | 11 | 88,068,341 | 88,084,729 | 16,388 +  | 1 |
| GenelD:70393  | 2210416O15Rik | 11 | 88,098,058 | 88,100,107 | 2,049 +   | 1 |
| GenelD:103841 | Cuedc1        | 11 | 88,099,146 | 88,194,140 | 94,994 +  | 2 |
| GenelD:64656  | Mrps23        | 11 | 88,204,418 | 88,211,507 | 7,089 +   | 1 |
| GenelD:76626  | Msi2          | 11 | 88,339,382 | 88,718,267 | 378,885 - | 1 |
| GenelD:193280 | C030037D09Rik | 11 | 88,718,643 | 88,728,572 | 9,929 +   | 1 |
| GenelD:11640  | Akap1         | 11 | 88,830,792 | 88,864,586 | 33,794 -  | 1 |
| GenelD:12812  | Coil          | 11 | 88,973,935 | 88,991,613 | 17,678 +  | 1 |
| GenelD:217069 | Trim25        | 11 | 88,999,403 | 89,020,293 | 20,890 +  | 1 |
| GenelD:56077  | Dgke          | 11 | 89,037,582 | 89,060,748 | 23,166 -  | 1 |
| GenelD:414094 | A930013B10Rik | 11 | 89,060,409 | 89,067,880 | 7,471 +   | 1 |
| GenelD:18121  | Nog           | 11 | 89,300,638 | 89,302,559 | 1,921 -   | 1 |
| GenelD:20913  | Stxbp4        | 11 | 90,476,492 | 90,638,108 | 161,616 - | 1 |
| GenelD:69802  | Cox11         | 11 | 90,638,184 | 90,645,977 | 7,793 +   | 1 |
| GenelD:71943  | Tom1l1        | 11 | 90,645,691 | 90,687,601 | 41,910 -  | 1 |
| GenelD:217109 | Utp18         | 11 | 93,859,243 | 93,885,766 | 26,523 -  | 1 |
| GenelD:103537 | Mbtd1         | 11 | 93,886,219 | 93,946,984 | 60,765 +  | 2 |
| GenelD:18103  | Nme2          | 11 | 93,949,815 | 93,956,007 | 6,192 -   | 1 |
| GenelD:18102  | Nme1          | 11 | 93,958,925 | 93,968,521 | 9,596 -   | 1 |
| GenelD:70834  | Spag9         | 11 | 93,996,091 | 94,126,083 | 129,992 + | 1 |
| GenelD:22057  | Tob1          | 11 | 94,211,454 | 94,215,495 | 4,041 +   | 1 |
| GenelD:278507 | Wfikkn2       | 11 | 94,235,952 | 94,242,579 | 6,627 -   | 1 |
| GenelD:67684  | Luc7l3        | 11 | 94,291,139 | 94,321,911 | 30,772 -  | 2 |
| GenelD:71452  | Ankrd40       | 11 | 94,328,001 | 94,341,847 | 13,846 +  | 2 |
| GenelD:12291  | Cacna1g       | 11 | 94,408,391 | 94,474,198 | 65,807 -  | 1 |
| GenelD:217116 | Spata20       | 11 | 94,478,904 | 94,485,310 | 6,406 -   | 1 |
| GenelD:71889  | Epn3          | 11 | 94,489,599 | 94,499,974 | 10,375 -  | 1 |
| GenelD:104601 | Mycbpap       | 11 | 94,501,347 | 94,521,502 | 20,155 -  | 1 |
| GenelD:237926 | Rsad1         | 11 | 94,539,798 | 94,549,207 | 9,409 -   | 1 |
| GenelD:264895 | Acsf2         | 11 | 94,557,102 | 94,601,786 | 44,684 -  | 1 |
| GenelD:98238  | Lrrc59        | 11 | 94,629,824 | 94,645,216 | 15,392 +  | 1 |
| GenelD:217119 | Xylt2         | 11 | 94,663,847 | 94,677,493 | 13,646 -  | 1 |
| GenelD:217124 | Ppp1r9b       | 11 | 94,991,212 | 95,006,898 | 15,686 +  | 2 |
| GenelD:217125 | Samd14        | 11 | 95,009,879 | 95,026,087 | 16,208 +  | 1 |
| GenelD:93670  | Tac4          | 11 | 95,261,529 | 95,269,262 | 7,733 +   | 1 |

|                 |               |    |            |            |          |   |
|-----------------|---------------|----|------------|------------|----------|---|
| GenelD:104079   | Nxph3         | 11 | 95,509,846 | 95,514,565 | 4,719 -  | 1 |
| GenelD:18053    | Ngfr          | 11 | 95,568,818 | 95,587,698 | 18,880 - | 2 |
| GenelD:432396   | 1110035M17Rik | 11 | 95,700,106 | 95,712,754 | 12,648 - | 1 |
| GenelD:320616   | B130006D01Rik | 11 | 95,723,586 | 95,726,773 | 3,187 +  | 1 |
| GenelD:237928   | Phospho1      | 11 | 95,824,500 | 95,832,140 | 7,640 +  | 2 |
| GenelD:66610    | Abi3          | 11 | 95,830,072 | 95,842,476 | 12,404 - | 2 |
| GenelD:268470   | Ube2z         | 11 | 96,047,431 | 96,065,364 | 17,933 - | 1 |
| GenelD:11951    | Atp5g1        | 11 | 96,072,793 | 96,075,694 | 2,901 -  | 1 |
| GenelD:193022   | Gm53          | 11 | 96,251,660 | 96,264,484 | 12,824 + | 1 |
| GenelD:15416    | Hoxb8         | 11 | 96,281,905 | 96,285,325 | 3,420 +  | 1 |
| GenelD:15415    | Hoxb7         | 11 | 96,286,646 | 96,290,163 | 3,517 +  | 1 |
| GenelD:15410    | Hoxb3         | 11 | 96,323,126 | 96,347,930 | 24,804 + | 2 |
| GenelD:103889   | Hoxb2         | 11 | 96,351,632 | 96,354,016 | 2,384 +  | 2 |
| GenelD:18023    | Nfe2l1        | 11 | 96,817,414 | 96,829,968 | 12,554 - | 2 |
| GenelD:56358    | Copz2         | 11 | 96,849,876 | 96,861,203 | 11,327 + | 1 |
| GenelD:387170   | Mir152        | 11 | 96,850,393 | 96,850,465 | 72 +     | 1 |
| GenelD:80280    | Cdk5rap3      | 11 | 96,907,786 | 96,916,481 | 8,695 -  | 1 |
| GenelD:10050263 | Gm11525       | 11 | 96,918,941 | 96,922,493 | 3,552 -  | 1 |
| GenelD:78912    | Sp2           | 11 | 96,953,337 | 96,977,688 | 24,351 - | 1 |
| GenelD:83395    | Sp6           | 11 | 97,013,569 | 97,024,738 | 11,169 + | 1 |
| GenelD:217140   | Scrn2         | 11 | 97,029,952 | 97,033,960 | 4,008 +  | 1 |
| GenelD:73174    | Tbkbp1        | 11 | 97,136,171 | 97,149,712 | 13,541 - | 1 |
| GenelD:16211    | Kpnb1         | 11 | 97,159,710 | 97,187,892 | 28,182 - | 2 |
| GenelD:19155    | Npepps        | 11 | 97,205,854 | 97,280,576 | 74,722 - | 1 |
| GenelD:192157   | Socs7         | 11 | 97,362,551 | 97,398,542 | 35,991 + | 2 |
| GenelD:58996    | Arhgap23      | 11 | 97,450,160 | 97,502,400 | 52,240 + | 1 |
| GenelD:69729    | 2410003L11Rik | 11 | 97,598,511 | 97,622,893 | 24,382 + | 1 |
| GenelD:103551   | E130012A19Rik | 11 | 97,627,387 | 97,629,716 | 2,329 -  | 1 |
| GenelD:246198   | Mllt6         | 11 | 97,663,412 | 97,685,458 | 22,046 + | 1 |
| GenelD:217149   | Cisd3         | 11 | 97,685,952 | 97,688,625 | 2,673 +  | 2 |
| GenelD:22658    | Pcgf2         | 11 | 97,688,823 | 97,700,497 | 11,674 - | 3 |
| GenelD:26446    | Psmb3         | 11 | 97,703,434 | 97,713,500 | 10,066 + | 2 |
| GenelD:108083   | Pip4k2b       | 11 | 97,715,157 | 97,744,704 | 29,547 - | 1 |
| GenelD:67480    | Cwc25         | 11 | 97,745,470 | 97,766,613 | 21,143 - | 1 |
| GenelD:72215    | 1700001P01Rik | 11 | 97,771,481 | 97,775,918 | 4,437 -  | 2 |
| GenelD:65019    | Rpl23         | 11 | 97,777,526 | 97,782,439 | 4,913 -  | 2 |
| GenelD:10030249 | Snora21       | 11 | 97,781,639 | 97,781,766 | 127 -    | 2 |
| GenelD:16796    | Lasp1         | 11 | 97,799,672 | 97,838,764 | 39,092 + | 1 |
| GenelD:72324    | Plxdc1        | 11 | 97,923,237 | 97,986,446 | 63,209 - | 1 |
| GenelD:217151   | Arl5c         | 11 | 97,989,578 | 97,996,173 | 6,595 -  | 1 |
| GenelD:12295    | Cacnb1        | 11 | 98,002,901 | 98,022,627 | 19,726 - | 2 |
| GenelD:19921    | Rpl19         | 11 | 98,026,710 | 98,030,493 | 3,783 +  | 2 |
| GenelD:217154   | Stac2         | 11 | 98,036,624 | 98,053,462 | 16,838 - | 2 |
| GenelD:72194    | Fbxl20        | 11 | 98,082,554 | 98,149,616 | 67,062 - | 1 |
| GenelD:19014    | Med1          | 11 | 98,152,154 | 98,193,293 | 41,139 - | 2 |
| GenelD:69131    | Cdk12         | 11 | 98,203,305 | 98,253,540 | 50,235 + | 1 |
| GenelD:18013    | Neurod2       | 11 | 98,325,417 | 98,329,645 | 4,228 -  | 1 |

|                 |          |    |             |             |          |   |
|-----------------|----------|----|-------------|-------------|----------|---|
| GenelD:13866    | Erbp2    | 11 | 98,412,484  | 98,437,716  | 25,232 + | 1 |
| GenelD:66612    | Ormdl3   | 11 | 98,581,294  | 98,587,245  | 5,951 -  | 1 |
| GenelD:57911    | Gsdma    | 11 | 98,664,351  | 98,677,708  | 13,357 + | 1 |
| GenelD:22123    | Psm3     | 11 | 98,682,554  | 98,695,978  | 13,424 + | 1 |
| GenelD:21833    | Thra     | 11 | 98,741,873  | 98,765,111  | 23,238 + | 4 |
| GenelD:217166   | Nr1d1    | 11 | 98,767,935  | 98,775,242  | 7,307 -  | 3 |
| GenelD:74026    | Msl1     | 11 | 98,795,769  | 98,807,859  | 12,090 + | 2 |
| GenelD:10003726 | Gm12359  | 11 | 98,798,309  | 98,810,089  | 11,780 - | 2 |
| GenelD:192160   | Casc3    | 11 | 98,809,808  | 98,833,807  | 23,999 + | 1 |
| GenelD:19401    | Rara     | 11 | 98,937,696  | 98,974,942  | 37,246 + | 7 |
| GenelD:353155   | Gjd3     | 11 | 98,982,180  | 98,983,016  | 836 -    | 1 |
| GenelD:16010    | Igfbp4   | 11 | 99,041,260  | 99,052,646  | 11,386 + | 1 |
| GenelD:57376    | Smarce1  | 11 | 99,209,047  | 99,231,017  | 21,970 - | 1 |
| GenelD:268481   | Krt222   | 11 | 99,233,098  | 99,244,067  | 10,969 - | 1 |
| GenelD:66180    | Leprel4  | 11 | 100,408,748 | 100,414,819 | 6,071 -  | 1 |
| GenelD:14230    | Fkbp10   | 11 | 100,415,694 | 100,424,840 | 9,146 +  | 1 |
| GenelD:68106    | Nt5c3b   | 11 | 100,422,321 | 100,441,089 | 18,768 - | 2 |
| GenelD:66720    | Klhl10   | 11 | 100,441,924 | 100,457,024 | 15,100 + | 1 |
| GenelD:217194   | Klhl11   | 11 | 100,462,612 | 100,472,782 | 10,170 - | 1 |
| GenelD:104112   | Acly     | 11 | 100,476,352 | 100,528,000 | 51,648 - | 2 |
| GenelD:56354    | Dnajc7   | 11 | 100,582,836 | 100,620,168 | 37,332 - | 1 |
| GenelD:71966    | Nkiras2  | 11 | 100,622,955 | 100,627,602 | 4,647 +  | 1 |
| GenelD:278304   | Zfp385c  | 11 | 100,626,219 | 100,650,693 | 24,474 - | 1 |
| GenelD:80861    | Dhx58    | 11 | 100,694,884 | 100,704,271 | 9,387 -  | 2 |
| GenelD:14534    | Kat2a    | 11 | 100,704,746 | 100,712,467 | 7,721 -  | 2 |
| GenelD:75482    | Hspb9    | 11 | 100,713,850 | 100,714,575 | 725 +    | 2 |
| GenelD:19345    | Rab5c    | 11 | 100,715,266 | 100,738,130 | 22,864 - | 2 |
| GenelD:20851    | Stat5b   | 11 | 100,780,731 | 100,850,585 | 69,854 - | 1 |
| GenelD:20850    | Stat5a   | 11 | 100,859,351 | 100,885,169 | 25,818 + | 1 |
| GenelD:19285    | Ptrf     | 11 | 100,956,736 | 100,970,617 | 13,881 - | 2 |
| GenelD:11975    | Atp6v0a1 | 11 | 101,009,452 | 101,063,719 | 54,267 + | 1 |
| GenelD:27419    | Naglu    | 11 | 101,070,094 | 101,077,672 | 7,578 +  | 3 |
| GenelD:15485    | Hsd17b1  | 11 | 101,078,411 | 101,080,505 | 2,094 +  | 3 |
| GenelD:71743    | Coasy    | 11 | 101,082,625 | 101,086,619 | 3,994 +  | 3 |
| GenelD:21428    | Mlx      | 11 | 101,087,290 | 101,092,207 | 4,917 +  | 3 |
| GenelD:19183    | Psmc3ip  | 11 | 101,092,141 | 101,095,435 | 3,294 -  | 2 |
| GenelD:67998    | Fam134c  | 11 | 101,096,322 | 101,119,843 | 23,521 - | 2 |
| GenelD:103733   | Tubg1    | 11 | 101,120,131 | 101,126,419 | 6,288 +  | 1 |
| GenelD:103768   | Tubg2    | 11 | 101,155,884 | 101,161,787 | 5,903 +  | 1 |
| GenelD:217198   | Plekhh3  | 11 | 101,162,679 | 101,171,302 | 8,623 -  | 1 |
| GenelD:12777    | Ccr10    | 11 | 101,172,998 | 101,175,443 | 2,445 -  | 1 |
| GenelD:53321    | Cntnap1  | 11 | 101,176,117 | 101,190,720 | 14,603 + | 1 |
| GenelD:14055    | Ezh1     | 11 | 101,191,115 | 101,226,450 | 35,335 - | 1 |
| GenelD:54409    | Ramp2    | 11 | 101,246,334 | 101,248,250 | 1,916 +  | 2 |
| GenelD:28084    | Vps25    | 11 | 101,253,743 | 101,259,546 | 5,803 +  | 2 |
| GenelD:69847    | Wnk4     | 11 | 101,260,567 | 101,277,409 | 16,842 + | 1 |
| GenelD:19192    | Psme3    | 11 | 101,316,251 | 101,323,531 | 7,280 +  | 1 |

|                 |               |    |             |             |           |   |
|-----------------|---------------|----|-------------|-------------|-----------|---|
| GenelD:237940   | Aoc2          | 11 | 101,325,063 | 101,329,699 | 4,636 +   | 1 |
| GenelD:69684    | Aarsd1        | 11 | 101,406,839 | 101,417,433 | 10,594 -  | 2 |
| GenelD:73635    | Ptges3l       | 11 | 101,418,814 | 101,425,333 | 6,519 -   | 2 |
| GenelD:217201   | Rundc1        | 11 | 101,425,085 | 101,435,666 | 10,581 +  | 3 |
| GenelD:19942    | Rpl27         | 11 | 101,442,245 | 101,445,596 | 3,351 +   | 1 |
| GenelD:70110    | Ifi35         | 11 | 101,448,412 | 101,458,701 | 10,289 +  | 2 |
| GenelD:26949    | Vat1          | 11 | 101,458,748 | 101,466,199 | 7,451 -   | 1 |
| GenelD:11858    | Rnd2          | 11 | 101,468,338 | 101,471,306 | 2,968 +   | 1 |
| GenelD:19848    | Rnu2-10       | 11 | 101,658,238 | 101,658,424 | 186 +     | 1 |
| GenelD:80981    | Arl4d         | 11 | 101,665,541 | 101,667,832 | 2,291 +   | 1 |
| GenelD:72349    | Dusp3         | 11 | 101,971,143 | 101,984,791 | 13,648 -  | 1 |
| GenelD:75437    | 1700006E09Rik | 11 | 101,987,056 | 101,992,264 | 5,208 +   | 1 |
| GenelD:268490   | Lsm12         | 11 | 102,163,489 | 102,185,256 | 21,767 -  | 2 |
| GenelD:68401    | G6pc3         | 11 | 102,189,699 | 102,194,081 | 4,382 +   | 2 |
| GenelD:15184    | Hdac5         | 11 | 102,195,747 | 102,230,172 | 34,425 -  | 1 |
| GenelD:217216   | BC030867      | 11 | 102,248,882 | 102,265,183 | 16,301 +  | 1 |
| GenelD:72053    | Tmub2         | 11 | 102,284,961 | 102,289,424 | 4,463 +   | 2 |
| GenelD:217218   | Atxn7l3       | 11 | 102,289,300 | 102,296,629 | 7,329 -   | 2 |
| GenelD:21429    | Ubtf          | 11 | 102,304,560 | 102,319,096 | 14,536 -  | 6 |
| GenelD:51799    | Rundc3a       | 11 | 102,393,403 | 102,402,939 | 9,536 +   | 1 |
| GenelD:68066    | Slc25a39      | 11 | 102,402,969 | 102,407,517 | 4,548 -   | 1 |
| GenelD:14824    | Grn           | 11 | 102,430,322 | 102,436,809 | 6,487 +   | 1 |
| GenelD:217219   | Fam171a2      | 11 | 102,436,981 | 102,447,663 | 10,682 -  | 2 |
| GenelD:16399    | Itga2b        | 11 | 102,453,297 | 102,469,883 | 16,586 -  | 1 |
| GenelD:237943   | Gpatch8       | 11 | 102,475,915 | 102,556,158 | 80,243 -  | 1 |
| GenelD:57265    | Fzd2          | 11 | 102,604,431 | 102,608,058 | 3,627 +   | 1 |
| GenelD:52715    | Ccdc43        | 11 | 102,684,688 | 102,697,725 | 13,037 -  | 1 |
| GenelD:11488    | Adam11        | 11 | 102,761,439 | 102,780,262 | 18,823 +  | 2 |
| GenelD:20624    | Eftud2        | 11 | 102,838,472 | 102,880,975 | 42,503 -  | 1 |
| GenelD:73293    | Ccdc103       | 11 | 102,881,244 | 102,885,215 | 3,971 +   | 1 |
| GenelD:66784    | Fam187a       | 11 | 102,885,169 | 102,886,731 | 1,562 +   | 1 |
| GenelD:14580    | Gfap          | 11 | 102,887,336 | 102,897,200 | 9,864 -   | 1 |
| GenelD:70218    | Kif18b        | 11 | 102,905,518 | 102,925,124 | 19,606 -  | 1 |
| GenelD:68087    | Dcakd         | 11 | 102,994,056 | 103,017,147 | 23,091 -  | 1 |
| GenelD:10086219 | LOC100862190  | 11 | 103,026,988 | 103,028,328 | 1,340 -   | 1 |
| GenelD:72469    | Plcd3         | 11 | 103,070,296 | 103,101,658 | 31,362 -  | 1 |
| GenelD:67131    | Acbd4         | 11 | 103,101,688 | 103,112,199 | 10,511 +  | 3 |
| GenelD:192231   | Hexim1        | 11 | 103,116,325 | 103,119,725 | 3,400 +   | 2 |
| GenelD:71059    | Hexim2        | 11 | 103,133,339 | 103,139,908 | 6,569 +   | 1 |
| GenelD:57778    | Fmnl1         | 11 | 103,171,138 | 103,198,900 | 27,762 +  | 1 |
| GenelD:104582   | Rprml         | 11 | 103,649,509 | 103,650,580 | 1,071 +   | 1 |
| GenelD:56494    | Gosr2         | 11 | 103,676,849 | 103,697,710 | 20,861 -  | 1 |
| GenelD:399609   | C130046K22Rik | 11 | 103,697,724 | 103,725,573 | 27,849 +  | 1 |
| GenelD:22415    | Wnt3          | 11 | 103,774,175 | 103,818,021 | 43,846 +  | 1 |
| GenelD:11841    | Arf2          | 11 | 103,966,871 | 103,985,336 | 18,465 +  | 1 |
| GenelD:17762    | Mapt          | 11 | 104,231,436 | 104,332,096 | 100,660 + | 1 |
| GenelD:76719    | Kansl1        | 11 | 104,333,229 | 104,442,291 | 109,062 - | 1 |

|                 |               |    |             |             |           |   |
|-----------------|---------------|----|-------------|-------------|-----------|---|
| GenelD:70894    | Efcab3        | 11 | 105,092,219 | 105,117,537 | 25,318 +  | 1 |
| GenelD:52686    | Mettl2        | 11 | 105,126,425 | 105,141,146 | 14,721 +  | 1 |
| GenelD:73431    | 1700052K11Rik | 11 | 105,179,020 | 105,181,433 | 2,413 -   | 2 |
| GenelD:24086    | Tlk2          | 11 | 105,181,530 | 105,283,956 | 102,426 + | 3 |
| GenelD:17534    | Mrc2          | 11 | 105,292,646 | 105,351,145 | 58,499 +  | 1 |
| GenelD:632687   | March10       | 11 | 105,360,798 | 105,456,735 | 95,937 -  | 1 |
| GenelD:77097    | Tanc2         | 11 | 105,589,986 | 105,929,304 | 339,318 + | 1 |
| GenelD:13056    | Cyb561        | 11 | 105,933,704 | 105,944,147 | 10,443 -  | 1 |
| GenelD:192775   | Kcnh6         | 11 | 106,008,203 | 106,034,064 | 25,861 +  | 1 |
| GenelD:71833    | Dcaf7         | 11 | 106,036,872 | 106,059,324 | 22,452 +  | 2 |
| GenelD:70207    | Taco1         | 11 | 106,066,107 | 106,073,612 | 7,505 +   | 1 |
| GenelD:26406    | Map3k3        | 11 | 106,084,902 | 106,155,446 | 70,544 +  | 1 |
| GenelD:67163    | Ccdc47        | 11 | 106,199,354 | 106,216,367 | 17,013 -  | 1 |
| GenelD:72047    | Ddx42         | 11 | 106,216,926 | 106,249,140 | 32,214 +  | 1 |
| GenelD:19184    | Psmc5         | 11 | 106,256,185 | 106,263,112 | 6,927 +   | 1 |
| GenelD:83796    | Smarcd2       | 11 | 106,263,171 | 106,272,972 | 9,801 -   | 1 |
| GenelD:75870    | Tcam1         | 11 | 106,276,672 | 106,288,143 | 11,471 +  | 1 |
| GenelD:21763    | Tex2          | 11 | 106,502,139 | 106,612,930 | 110,791 - | 1 |
| GenelD:50776    | Polg2         | 11 | 106,768,204 | 106,779,537 | 11,333 -  | 2 |
| GenelD:13207    | Ddx5          | 11 | 106,780,356 | 106,788,494 | 8,138 -   | 2 |
| GenelD:10052646 | Mir3064       | 11 | 106,782,693 | 106,782,759 | 66 -      | 2 |
| GenelD:320162   | Cep95         | 11 | 106,789,252 | 106,818,861 | 29,609 +  | 2 |
| GenelD:66313    | Smurf2        | 11 | 106,820,064 | 106,920,715 | 100,651 - | 1 |
| GenelD:16647    | Kpna2         | 11 | 106,988,629 | 106,999,525 | 10,896 -  | 1 |
| GenelD:68979    | Nol11         | 11 | 107,166,660 | 107,189,381 | 22,721 -  | 1 |
| GenelD:71795    | Pitpnc1       | 11 | 107,207,892 | 107,470,720 | 262,828 - | 1 |
| GenelD:66997    | Psmd12        | 11 | 107,479,528 | 107,498,036 | 18,508 +  | 1 |
| GenelD:442842   | A830035A12Rik | 11 | 107,531,757 | 107,562,202 | 30,445 -  | 1 |
| GenelD:78455    | Helz          | 11 | 107,547,960 | 107,686,943 | 138,983 + | 1 |
| GenelD:54377    | Cacng4        | 11 | 107,734,780 | 107,794,464 | 59,684 -  | 2 |
| GenelD:18750    | Prkca         | 11 | 107,933,387 | 108,343,888 | 410,501 - | 1 |
| GenelD:76380    | Cep112        | 11 | 108,425,266 | 108,860,615 | 435,349 + | 1 |
| GenelD:12006    | Axin2         | 11 | 108,920,349 | 108,950,783 | 30,434 +  | 1 |
| GenelD:67927    | 1700096J18Rik | 11 | 109,346,867 | 109,353,651 | 6,784 +   | 1 |
| GenelD:10003676 | Gm11696       | 11 | 109,354,778 | 109,363,654 | 8,876 -   | 1 |
| GenelD:14674    | Gna13         | 11 | 109,362,794 | 109,401,369 | 38,575 +  | 1 |
| GenelD:104681   | Slc16a6       | 11 | 109,450,855 | 109,473,596 | 22,741 -  | 2 |
| GenelD:74008    | Arsg          | 11 | 109,473,374 | 109,573,330 | 99,956 +  | 2 |
| GenelD:52639    | Wipi1         | 11 | 109,573,521 | 109,611,389 | 37,868 -  | 1 |
| GenelD:19084    | Prkar1a       | 11 | 109,650,949 | 109,669,648 | 18,699 +  | 1 |
| GenelD:20682    | Sox9          | 11 | 112,782,210 | 112,787,757 | 5,547 +   | 3 |
| GenelD:10003873 | Gm11681       | 11 | 112,792,731 | 112,799,008 | 6,277 -   | 2 |
| GenelD:16834    | Cog1          | 11 | 113,649,529 | 113,662,401 | 12,872 +  | 1 |
| GenelD:28081    | Fam104a       | 11 | 113,661,319 | 113,684,151 | 22,832 -  | 1 |
| GenelD:276852   | D11Wsu47e     | 11 | 113,684,412 | 113,694,647 | 10,235 +  | 1 |
| GenelD:56699    | Cdc42ep4      | 11 | 113,726,850 | 113,751,815 | 24,965 -  | 1 |
| GenelD:237979   | Sdk2          | 11 | 113,780,790 | 114,065,951 | 285,161 - | 2 |



|                 |               |    |             |             |          |   |
|-----------------|---------------|----|-------------|-------------|----------|---|
| GenelD:67671    | Rpl38         | 11 | 114,668,543 | 114,672,331 | 3,788 +  | 1 |
| GenelD:117160   | Ttyh2         | 11 | 114,675,468 | 114,720,984 | 45,516 + | 2 |
| GenelD:70355    | Gprc5c        | 11 | 114,851,532 | 114,872,617 | 21,085 + | 1 |
| GenelD:320534   | Tmem104       | 11 | 115,187,487 | 115,247,025 | 59,538 + | 1 |
| GenelD:14813    | Grin2c        | 11 | 115,249,169 | 115,267,243 | 18,074 - | 1 |
| GenelD:217310   | Hid1          | 11 | 115,347,709 | 115,367,719 | 20,010 - | 1 |
| GenelD:237988   | Cdr2l         | 11 | 115,381,916 | 115,396,132 | 14,216 + | 2 |
| GenelD:68572    | Ict1          | 11 | 115,403,766 | 115,410,913 | 7,147 +  | 2 |
| GenelD:71679    | Atp5h         | 11 | 115,415,697 | 115,419,919 | 4,222 -  | 1 |
| GenelD:70382    | Kctd2         | 11 | 115,420,126 | 115,431,274 | 11,148 + | 1 |
| GenelD:217316   | Slc16a5       | 11 | 115,462,473 | 115,474,398 | 11,925 + | 1 |
| GenelD:276905   | Armc7         | 11 | 115,475,677 | 115,490,466 | 14,789 + | 2 |
| GenelD:50773    | Nt5c          | 11 | 115,490,425 | 115,491,814 | 1,389 -  | 1 |
| GenelD:15374    | Hn1           | 11 | 115,497,353 | 115,514,370 | 17,017 - | 2 |
| GenelD:170930   | Sumo2         | 11 | 115,523,109 | 115,536,230 | 13,121 - | 2 |
| GenelD:260302   | Gga3          | 11 | 115,584,255 | 115,603,916 | 19,661 - | 2 |
| GenelD:50529    | Mrps7         | 11 | 115,604,151 | 115,607,624 | 3,473 +  | 2 |
| GenelD:69674    | Mif4gd        | 11 | 115,607,918 | 115,612,969 | 5,051 -  | 2 |
| GenelD:67283    | Slc25a19      | 11 | 115,614,181 | 115,628,295 | 14,114 - | 2 |
| GenelD:71947    | 2310067B10Rik | 11 | 115,765,433 | 115,799,033 | 33,600 + | 1 |
| GenelD:140721   | Caskin2       | 11 | 115,799,352 | 115,813,592 | 14,240 - | 4 |
| GenelD:76265    | Tsen54        | 11 | 115,814,739 | 115,823,102 | 8,363 +  | 3 |
| GenelD:217325   | Llgl2         | 11 | 115,824,058 | 115,855,780 | 31,722 + | 3 |
| GenelD:10105597 | LOC101055975  | 11 | 115,857,906 | 115,859,889 | 1,983 -  | 1 |
| GenelD:192897   | Itgb4         | 11 | 115,974,725 | 116,008,411 | 33,686 + | 1 |
| GenelD:14635    | Galk1         | 11 | 116,008,357 | 116,012,719 | 4,362 -  | 1 |
| GenelD:15081    | H3f3b         | 11 | 116,021,961 | 116,024,504 | 2,543 -  | 1 |
| GenelD:217331   | Unk           | 11 | 116,030,322 | 116,061,194 | 30,872 + | 1 |
| GenelD:217333   | Trim47        | 11 | 116,105,750 | 116,110,235 | 4,485 -  | 2 |
| GenelD:338364   | Trim65        | 11 | 116,124,708 | 116,131,128 | 6,420 -  | 1 |
| GenelD:60441    | Mrp138        | 11 | 116,131,817 | 116,138,868 | 7,051 -  | 2 |
| GenelD:217335   | Fbf1          | 11 | 116,142,285 | 116,168,178 | 25,893 - | 1 |
| GenelD:14027    | Evpl          | 11 | 116,220,559 | 116,238,091 | 17,532 - | 1 |
| GenelD:217337   | Srp68         | 11 | 116,245,166 | 116,274,217 | 29,051 - | 2 |
| GenelD:14428    | Galr2         | 11 | 116,280,939 | 116,283,938 | 2,999 +  | 1 |
| GenelD:15223    | Foxj1         | 11 | 116,330,704 | 116,335,354 | 4,650 -  | 1 |
| GenelD:217340   | Rnf157        | 11 | 116,336,345 | 116,413,032 | 76,687 - | 2 |
| GenelD:319370   | Ubald2        | 11 | 116,434,094 | 116,439,077 | 4,983 +  | 2 |
| GenelD:217341   | Qrich2        | 11 | 116,441,325 | 116,454,347 | 13,022 - | 2 |
| GenelD:67763    | Prpsap1       | 11 | 116,470,816 | 116,490,346 | 19,530 - | 1 |
| GenelD:20698    | Sphk1         | 11 | 116,531,911 | 116,536,675 | 4,764 +  | 1 |
| GenelD:217342   | Ube2o         | 11 | 116,537,753 | 116,581,447 | 43,694 - | 2 |
| GenelD:217344   | Rhbdf2        | 11 | 116,598,165 | 116,627,019 | 28,854 - | 1 |
| GenelD:114886   | Cygb          | 11 | 116,645,595 | 116,654,313 | 8,718 -  | 1 |
| GenelD:10003857 | Gm11744       | 11 | 116,657,108 | 116,668,389 | 11,281 + | 1 |
| GenelD:67622    | Mxra7         | 11 | 116,803,400 | 116,828,046 | 24,646 - | 1 |
| GenelD:107817   | Jmjd6         | 11 | 116,837,432 | 116,843,449 | 6,017 -  | 3 |

|                 |               |    |             |             |           |   |
|-----------------|---------------|----|-------------|-------------|-----------|---|
| GenelD:74319    | Mettl23       | 11 | 116,843,515 | 116,849,740 | 6,225 +   | 2 |
| GenelD:20382    | Srsf2         | 11 | 116,849,897 | 116,853,094 | 3,197 -   | 2 |
| GenelD:69900    | Mfsd11        | 11 | 116,854,015 | 116,875,660 | 21,645 +  | 1 |
| GenelD:74136    | Sec14l1       | 11 | 117,115,172 | 117,159,268 | 44,096 +  | 1 |
| GenelD:53860    | Sept9         | 11 | 117,199,661 | 117,362,325 | 162,664 + | 1 |
| GenelD:217351   | Tnrc6c        | 11 | 117,654,289 | 117,763,439 | 109,150 + | 2 |
| GenelD:217353   | Tmc6          | 11 | 117,765,985 | 117,780,683 | 14,698 -  | 1 |
| GenelD:217356   | Tmc8          | 11 | 117,782,297 | 117,793,137 | 10,840 +  | 1 |
| GenelD:77727    | 6030468B19Rik | 11 | 117,797,660 | 117,807,308 | 9,648 +   | 1 |
| GenelD:20973    | Syngt2        | 11 | 117,809,667 | 117,814,286 | 4,619 +   | 1 |
| GenelD:21877    | Tk1           | 11 | 117,815,519 | 117,826,014 | 10,495 -  | 1 |
| GenelD:71562    | Afmid         | 11 | 117,825,919 | 117,839,908 | 13,989 +  | 1 |
| GenelD:11799    | Birc5         | 11 | 117,849,237 | 117,855,743 | 6,506 +   | 1 |
| GenelD:546519   | Tmem235       | 11 | 117,860,752 | 117,865,543 | 4,791 +   | 1 |
| GenelD:71776    | Tha1          | 11 | 117,867,949 | 117,873,526 | 5,577 -   | 1 |
| GenelD:10050375 | Gm11725       | 11 | 117,871,250 | 117,887,416 | 16,166 +  | 1 |
| GenelD:12702    | Socs3         | 11 | 117,966,079 | 117,969,366 | 3,287 -   | 1 |
| GenelD:74451    | Pgs1          | 11 | 117,986,857 | 118,024,011 | 37,154 +  | 1 |
| GenelD:21858    | Timp2         | 11 | 118,301,061 | 118,355,411 | 54,350 -  | 1 |
| GenelD:76025    | Cant1         | 11 | 118,406,289 | 118,419,118 | 12,829 -  | 1 |
| GenelD:56745    | C1qtnf1       | 11 | 118,428,457 | 118,451,782 | 23,325 +  | 1 |
| GenelD:12416    | Cbx2          | 11 | 119,023,029 | 119,031,270 | 8,241 +   | 2 |
| GenelD:30951    | Cbx8          | 11 | 119,038,436 | 119,040,913 | 2,477 -   | 2 |
| GenelD:12418    | Cbx4          | 11 | 119,077,571 | 119,086,237 | 8,666 -   | 1 |
| GenelD:207592   | Tbc1d16       | 11 | 119,143,043 | 119,228,499 | 85,456 -  | 2 |
| GenelD:207607   | Ccdc40        | 11 | 119,228,572 | 119,265,212 | 36,640 +  | 1 |
| GenelD:192170   | Eif4a3        | 11 | 119,288,363 | 119,300,043 | 11,680 -  | 1 |
| GenelD:170720   | Card14        | 11 | 119,314,787 | 119,345,375 | 30,588 +  | 1 |
| GenelD:27029    | Sgsh          | 11 | 119,343,489 | 119,355,510 | 12,021 -  | 1 |
| GenelD:268512   | Slc26a11      | 11 | 119,355,557 | 119,381,076 | 25,519 +  | 2 |
| GenelD:10031669 | Mir1932       | 11 | 119,390,472 | 119,390,561 | 89 +      | 1 |
| GenelD:672511   | Rnf213        | 11 | 119,393,100 | 119,487,418 | 94,318 +  | 2 |
| GenelD:338371   | Endov         | 11 | 119,491,347 | 119,511,465 | 20,118 +  | 1 |
| GenelD:18164    | Nptx1         | 11 | 119,538,719 | 119,547,820 | 9,101 -   | 1 |
| GenelD:10050383 | Gm11762       | 11 | 119,548,630 | 119,569,046 | 20,416 +  | 1 |
| GenelD:74370    | Rptor         | 11 | 119,602,995 | 119,899,591 | 296,596 + | 1 |
| GenelD:208092   | Chmp6         | 11 | 119,913,810 | 119,919,552 | 5,742 +   | 1 |
| GenelD:108100   | Baiap2        | 11 | 119,943,092 | 120,006,782 | 63,690 +  | 2 |
| GenelD:11302    | Aatk          | 11 | 120,007,313 | 120,047,145 | 39,832 -  | 1 |
| GenelD:723844   | Mir338        | 11 | 120,014,765 | 120,014,862 | 97 -      | 1 |
| GenelD:10052651 | Mir3065       | 11 | 120,014,767 | 120,014,853 | 86 +      | 1 |
| GenelD:76377    | Gm9734        | 11 | 120,185,343 | 120,186,676 | 1,333 +   | 3 |
| GenelD:10004233 | 2810410L24Rik | 11 | 120,186,650 | 120,189,856 | 3,206 -   | 3 |
| GenelD:268515   | Bahcc1        | 11 | 120,232,947 | 120,292,297 | 59,350 +  | 4 |
| GenelD:10050391 | Gm11772       | 11 | 120,235,187 | 120,236,118 | 931 -     | 3 |
| GenelD:11465    | Actg1         | 11 | 120,345,690 | 120,348,484 | 2,794 -   | 2 |
| GenelD:66838    | 0610009L18Rik | 11 | 120,348,678 | 120,351,190 | 2,512 +   | 2 |

|                 |               |    |             |             |           |   |
|-----------------|---------------|----|-------------|-------------|-----------|---|
| GenelD:238021   | Fscn2         | 11 | 120,361,534 | 120,368,173 | 6,639 +   | 2 |
| GenelD:71885    | 2310003H01Rik | 11 | 120,369,562 | 120,378,746 | 9,184 -   | 2 |
| GenelD:217365   | Nploc4        | 11 | 120,379,798 | 120,437,700 | 57,902 -  | 2 |
| GenelD:208634   | Tspan10       | 11 | 120,442,631 | 120,447,321 | 4,690 +   | 1 |
| GenelD:18588    | Pde6g         | 11 | 120,447,610 | 120,453,483 | 5,873 -   | 2 |
| GenelD:66431    | Oxld1         | 11 | 120,456,604 | 120,458,063 | 1,459 -   | 1 |
| GenelD:67291    | Ccdc137       | 11 | 120,458,129 | 120,464,354 | 6,225 +   | 1 |
| GenelD:70317    | Arl16         | 11 | 120,464,326 | 120,467,600 | 3,274 -   | 1 |
| GenelD:15239    | Hgs           | 11 | 120,467,635 | 120,483,984 | 16,349 +  | 5 |
| GenelD:56282    | Mrpl12        | 11 | 120,484,669 | 120,488,754 | 4,085 +   | 4 |
| GenelD:10086176 | Gm16755       | 11 | 120,486,339 | 120,488,753 | 2,414 -   | 4 |
| GenelD:27376    | Slc25a10      | 11 | 120,491,837 | 120,501,161 | 9,324 +   | 3 |
| GenelD:14527    | Gcgr          | 11 | 120,530,727 | 120,538,984 | 8,257 +   | 1 |
| GenelD:192173   | Fam195b       | 11 | 120,542,888 | 120,549,727 | 6,839 -   | 1 |
| GenelD:68701    | Ppp1r27       | 11 | 120,549,975 | 120,551,132 | 1,157 -   | 1 |
| GenelD:18453    | P4hb          | 11 | 120,560,304 | 120,572,936 | 12,632 -  | 3 |
| GenelD:192662   | Arhgdia       | 11 | 120,577,235 | 120,581,620 | 4,385 -   | 3 |
| GenelD:21681    | Alyref        | 11 | 120,594,516 | 120,598,365 | 3,849 -   | 2 |
| GenelD:66156    | Anapc11       | 11 | 120,598,421 | 120,608,198 | 9,777 +   | 2 |
| GenelD:208990   | Npb           | 11 | 120,608,477 | 120,609,100 | 623 +     | 1 |
| GenelD:68671    | Pcyt2         | 11 | 120,610,087 | 120,617,890 | 7,803 -   | 1 |
| GenelD:209011   | Sirt7         | 11 | 120,618,372 | 120,625,002 | 6,630 -   | 4 |
| GenelD:17134    | Mafg          | 11 | 120,628,348 | 120,633,547 | 5,199 -   | 4 |
| GenelD:209027   | Pycr1         | 11 | 120,635,712 | 120,643,670 | 7,958 -   | 3 |
| GenelD:68938    | Aspscr1       | 11 | 120,672,973 | 120,709,447 | 36,474 +  | 2 |
| GenelD:20892    | Stra13        | 11 | 120,710,941 | 120,713,767 | 2,826 -   | 2 |
| GenelD:217366   | Lrrc45        | 11 | 120,713,953 | 120,721,128 | 7,175 +   | 2 |
| GenelD:170758   | Rac3          | 11 | 120,721,468 | 120,723,969 | 2,501 +   | 2 |
| GenelD:67880    | Dcxr          | 11 | 120,725,373 | 120,727,281 | 1,908 -   | 1 |
| GenelD:12409    | Cbr2          | 11 | 120,729,485 | 120,732,021 | 2,536 -   | 1 |
| GenelD:19719    | Rfng          | 11 | 120,780,745 | 120,784,204 | 3,459 -   | 2 |
| GenelD:209318   | Gps1          | 11 | 120,784,272 | 120,789,102 | 4,830 +   | 3 |
| GenelD:68730    | Dus1l         | 11 | 120,789,202 | 120,796,395 | 7,193 -   | 3 |
| GenelD:14104    | Fasn          | 11 | 120,805,958 | 120,824,547 | 18,589 -  | 2 |
| GenelD:71276    | Ccdc57        | 11 | 120,826,542 | 120,932,872 | 106,330 - | 1 |
| GenelD:80879    | Slc16a3       | 11 | 120,948,484 | 120,959,000 | 10,516 +  | 1 |
| GenelD:104318   | Csnk1d        | 11 | 120,961,741 | 120,991,333 | 29,592 -  | 1 |
| GenelD:73679    | Tex19.1       | 11 | 121,146,143 | 121,148,314 | 2,171 +   | 1 |
| GenelD:66179    | Ogfod3        | 11 | 121,177,593 | 121,204,648 | 27,055 -  | 1 |
| GenelD:238023   | Hexdc         | 11 | 121,204,433 | 121,222,656 | 18,223 +  | 1 |
| GenelD:66840    | Wdr45b        | 11 | 121,327,203 | 121,354,447 | 27,244 -  | 1 |
| GenelD:217371   | Rab40b        | 11 | 121,356,121 | 121,388,251 | 32,130 -  | 1 |
| GenelD:63828    | Fn3k          | 11 | 121,434,953 | 121,450,490 | 15,537 +  | 1 |
| GenelD:108903   | Tbcd          | 11 | 121,451,949 | 121,617,170 | 165,221 + | 1 |
| GenelD:210029   | Metrn1        | 11 | 121,702,427 | 121,717,389 | 14,962 +  | 1 |
| GenelD:19325    | Rab10         | 12 | 3,247,428   | 3,309,969   | 62,541 -  | 1 |
| GenelD:10004304 | 1110002L01Rik | 12 | 3,403,883   | 3,426,747   | 22,864 -  | 1 |

|               |               |    |            |            |           |   |
|---------------|---------------|----|------------|------------|-----------|---|
| GenelD:75302  | Asxl2         | 12 | 3,426,857  | 3,506,852  | 79,995 +  | 1 |
| GenelD:13528  | Dtnb          | 12 | 3,572,391  | 3,781,398  | 209,007 + | 2 |
| GenelD:13435  | Dnmt3a        | 12 | 3,806,980  | 3,914,443  | 107,463 + | 1 |
| GenelD:104111 | Adcy3         | 12 | 4,133,397  | 4,213,524  | 80,127 +  | 1 |
| GenelD:17977  | Ncoa1         | 12 | 4,247,362  | 4,477,182  | 229,820 - | 2 |
| GenelD:14226  | Fkbp1b        | 12 | 4,833,174  | 4,841,595  | 8,421 -   | 1 |
| GenelD:238037 | BC068281      | 12 | 4,843,303  | 4,856,974  | 13,671 +  | 1 |
| GenelD:217379 | Ubxn2a        | 12 | 4,879,032  | 4,907,520  | 28,488 -  | 2 |
| GenelD:320817 | Atad2b        | 12 | 4,917,353  | 5,047,410  | 130,057 + | 2 |
| GenelD:208439 | Klhl29        | 12 | 5,077,465  | 5,375,682  | 298,217 - | 1 |
| GenelD:80913  | Pum2          | 12 | 8,674,134  | 8,752,583  | 78,449 +  | 1 |
| GenelD:20969  | Sdc1          | 12 | 8,771,396  | 8,793,688  | 22,292 +  | 1 |
| GenelD:17775  | Laptm4a       | 12 | 8,921,307  | 8,938,742  | 17,435 +  | 1 |
| GenelD:69420  | 1700022H16Rik | 12 | 9,565,236  | 9,570,585  | 5,349 -   | 1 |
| GenelD:23967  | Osr1          | 12 | 9,574,442  | 9,581,500  | 7,058 +   | 1 |
| GenelD:70881  | Nt5c1b        | 12 | 10,369,971 | 10,390,174 | 20,203 +  | 1 |
| GenelD:105014 | Rdh14         | 12 | 10,390,780 | 10,395,562 | 4,782 +   | 1 |
| GenelD:209334 | Gen1          | 12 | 11,240,926 | 11,265,787 | 24,861 -  | 1 |
| GenelD:67241  | Smc6          | 12 | 11,265,886 | 11,319,785 | 53,899 +  | 1 |
| GenelD:209550 | Rad51ap2      | 12 | 11,456,079 | 11,462,928 | 6,849 +   | 1 |
| GenelD:18109  | Mycn          | 12 | 12,936,093 | 12,941,836 | 5,743 -   | 3 |
| GenelD:104721 | Ddx1          | 12 | 13,219,307 | 13,249,174 | 29,867 -  | 1 |
| GenelD:217410 | Trib2         | 12 | 15,791,727 | 15,816,785 | 25,058 -  | 1 |
| GenelD:18217  | Ntsr2         | 12 | 16,653,470 | 16,660,236 | 6,766 +   | 1 |
| GenelD:268527 | Greb1         | 12 | 16,670,615 | 16,800,886 | 130,271 - | 2 |
| GenelD:50496  | E2f6          | 12 | 16,810,965 | 16,826,752 | 15,787 +  | 2 |
| GenelD:19878  | Rock2         | 12 | 16,894,978 | 16,988,274 | 93,296 +  | 1 |
| GenelD:71853  | Pdia6         | 12 | 17,266,595 | 17,284,770 | 18,175 +  | 1 |
| GenelD:18263  | Odc1          | 12 | 17,544,873 | 17,551,502 | 6,629 +   | 1 |
| GenelD:53602  | Hpcal1        | 12 | 17,690,814 | 17,791,926 | 101,112 + | 1 |
| GenelD:54451  | Cpsf3         | 12 | 21,286,297 | 21,315,056 | 28,759 +  | 1 |
| GenelD:67732  | Iah1          | 12 | 21,316,392 | 21,323,607 | 7,215 +   | 1 |
| GenelD:11491  | Adam17        | 12 | 21,323,509 | 21,373,591 | 50,082 -  | 1 |
| GenelD:194655 | Klf11         | 12 | 24,651,371 | 24,662,782 | 11,411 +  | 1 |
| GenelD:20135  | Rrm2          | 12 | 24,708,254 | 24,714,146 | 5,892 +   | 1 |
| GenelD:77480  | Kidins220     | 12 | 24,974,932 | 25,059,697 | 84,765 +  | 1 |
| GenelD:108089 | Rnf144a       | 12 | 26,306,797 | 26,415,256 | 108,459 - | 1 |
| GenelD:22169  | Cmpk2         | 12 | 26,469,215 | 26,479,837 | 10,622 +  | 1 |
| GenelD:20666  | Sox11         | 12 | 27,334,268 | 27,342,718 | 8,450 -   | 1 |
| GenelD:20115  | Rps7          | 12 | 28,630,847 | 28,635,953 | 5,106 -   | 1 |
| GenelD:19819  | Rnaseh1       | 12 | 28,649,602 | 28,659,591 | 9,989 +   | 1 |
| GenelD:69675  | Pxdn          | 12 | 29,938,036 | 30,017,658 | 79,622 +  | 1 |
| GenelD:16777  | Lamb1         | 12 | 31,265,294 | 31,329,639 | 64,345 +  | 1 |
| GenelD:13382  | Dld           | 12 | 31,331,562 | 31,351,437 | 19,875 -  | 1 |
| GenelD:23985  | Slc26a4       | 12 | 31,519,819 | 31,559,969 | 40,150 -  | 1 |
| GenelD:73389  | Hbp1          | 12 | 31,926,455 | 31,950,535 | 24,080 -  | 1 |
| GenelD:19088  | Prkar2b       | 12 | 31,958,479 | 32,061,279 | 102,800 - | 2 |

|                 |               |    |            |            |           |   |
|-----------------|---------------|----|------------|------------|-----------|---|
| GenelD:72123    | Ccdc71l       | 12 | 32,378,789 | 32,382,943 | 4,154 +   | 2 |
| GenelD:74076    | 4933406C10Rik | 12 | 32,919,384 | 32,953,789 | 34,405 -  | 1 |
| GenelD:19027    | Sypl          | 12 | 32,953,945 | 32,979,502 | 25,557 +  | 1 |
| GenelD:28071    | Twistnb       | 12 | 33,429,624 | 33,439,380 | 9,756 +   | 1 |
| GenelD:22160    | Twist1        | 12 | 33,957,671 | 33,959,831 | 2,160 +   | 2 |
| GenelD:217463   | Snx13         | 12 | 35,047,189 | 35,147,477 | 100,288 + | 1 |
| GenelD:10016986 | Gm10933       | 12 | 35,055,101 | 35,056,959 | 1,858 +   | 1 |
| GenelD:11622    | Ahr           | 12 | 35,497,979 | 35,534,989 | 37,010 -  | 1 |
| GenelD:66912    | Bzw2          | 12 | 36,091,835 | 36,156,825 | 64,990 -  | 1 |
| GenelD:217473   | Ankmy2        | 12 | 36,157,124 | 36,197,291 | 40,167 +  | 1 |
| GenelD:10050310 | Gm19558       | 12 | 36,376,058 | 36,380,498 | 4,440 -   | 1 |
| GenelD:75847    | Ispd          | 12 | 36,381,519 | 36,689,444 | 307,925 + | 1 |
| GenelD:14009    | Etv1          | 12 | 38,780,258 | 38,868,215 | 87,957 +  | 1 |
| GenelD:11861    | Arl4a         | 12 | 40,033,291 | 40,037,987 | 4,696 -   | 1 |
| GenelD:246196   | Zfp277        | 12 | 40,315,046 | 40,445,790 | 130,744 - | 1 |
| GenelD:238130   | Dock4         | 12 | 40,446,053 | 40,846,495 | 400,442 + | 1 |
| GenelD:67452    | Pnpla8        | 12 | 44,269,154 | 44,313,437 | 44,283 +  | 1 |
| GenelD:217517   | Stxbp6        | 12 | 44,852,486 | 45,074,483 | 221,997 - | 1 |
| GenelD:18760    | Prkd1         | 12 | 50,341,231 | 50,649,223 | 307,992 - | 1 |
| GenelD:94186    | Strn3         | 12 | 51,608,541 | 51,691,914 | 83,373 -  | 1 |
| GenelD:11782    | Ap4s1         | 12 | 51,690,966 | 51,738,939 | 47,973 +  | 1 |
| GenelD:207304   | Hectd1        | 12 | 51,743,722 | 51,829,536 | 85,814 -  | 2 |
| GenelD:544864   | Gm5785        | 12 | 51,828,185 | 51,832,457 | 4,272 +   | 2 |
| GenelD:320487   | Heatr5a       | 12 | 51,875,873 | 51,971,321 | 95,448 -  | 1 |
| GenelD:66266    | Eapp          | 12 | 54,673,467 | 54,695,865 | 22,398 -  | 1 |
| GenelD:72183    | Snx6          | 12 | 54,746,357 | 54,795,662 | 49,305 -  | 1 |
| GenelD:217578   | Baz1a         | 12 | 54,892,989 | 54,986,336 | 93,347 -  | 2 |
| GenelD:26443    | Psma6         | 12 | 55,398,825 | 55,418,459 | 19,634 +  | 1 |
| GenelD:18035    | Nfkbia        | 12 | 55,489,409 | 55,492,647 | 3,238 -   | 1 |
| GenelD:56856    | Insm2         | 12 | 55,598,917 | 55,602,018 | 3,101 +   | 1 |
| GenelD:56784    | Ralgapa1      | 12 | 55,602,899 | 55,821,167 | 218,268 - | 2 |
| GenelD:104798   | E030019B13Rik | 12 | 56,490,428 | 56,529,420 | 38,992 -  | 1 |
| GenelD:21869    | Nkx2-1        | 12 | 56,531,935 | 56,536,908 | 4,973 -   | 1 |
| GenelD:18094    | Nkx2-9        | 12 | 56,611,393 | 56,613,284 | 1,891 -   | 1 |
| GenelD:18511    | Pax9          | 12 | 56,695,639 | 56,711,230 | 15,591 +  | 1 |
| GenelD:328099   | Prps113       | 12 | 57,230,412 | 57,242,168 | 11,756 +  | 1 |
| GenelD:73490    | Mipol1        | 12 | 57,230,425 | 57,457,241 | 226,816 + | 1 |
| GenelD:20334    | Sec23a        | 12 | 58,958,384 | 59,012,017 | 53,633 -  | 1 |
| GenelD:66603    | Gemin2        | 12 | 59,013,393 | 59,027,988 | 14,595 +  | 1 |
| GenelD:78232    | Trappc6b      | 12 | 59,043,092 | 59,061,461 | 18,369 -  | 1 |
| GenelD:18949    | Pnn           | 12 | 59,066,919 | 59,074,017 | 7,098 +   | 1 |
| GenelD:217615   | Ctage5        | 12 | 59,129,746 | 59,190,220 | 60,474 +  | 1 |
| GenelD:70611    | Fbxo33        | 12 | 59,200,655 | 59,219,483 | 18,828 -  | 1 |
| GenelD:328110   | Prpf39        | 12 | 65,036,334 | 65,063,386 | 27,052 +  | 2 |
| GenelD:30795    | Fkbp3         | 12 | 65,062,432 | 65,073,938 | 11,506 -  | 2 |
| GenelD:104806   | Fancm         | 12 | 65,075,606 | 65,132,058 | 56,452 +  | 2 |
| GenelD:217653   | Mis18bp1      | 12 | 65,132,734 | 65,172,580 | 39,846 -  | 1 |

|                 |               |    |            |            |           |   |
|-----------------|---------------|----|------------|------------|-----------|---|
| GenelD:20090    | Rps29         | 12 | 69,157,722 | 69,159,186 | 1,464 -   | 1 |
| GenelD:103948   | Rn7s1         | 12 | 69,159,295 | 69,159,593 | 298 +     | 1 |
| GenelD:69706    | Lrr1          | 12 | 69,168,814 | 69,179,010 | 10,196 +  | 2 |
| GenelD:66483    | Rpl36al       | 12 | 69,182,734 | 69,184,067 | 1,333 -   | 1 |
| GenelD:217664   | Mgat2         | 12 | 69,184,158 | 69,186,773 | 2,615 +   | 2 |
| GenelD:109065   | Dnaaf2        | 12 | 69,189,838 | 69,198,429 | 8,591 -   | 2 |
| GenelD:414085   | 9330151L19Rik | 12 | 69,197,211 | 69,199,868 | 2,657 +   | 1 |
| GenelD:18974    | Pole2         | 12 | 69,201,779 | 69,228,190 | 26,411 -  | 1 |
| GenelD:271005   | Klhdc1        | 12 | 69,241,832 | 69,283,961 | 42,129 +  | 1 |
| GenelD:69554    | Klhdc2        | 12 | 69,296,681 | 69,310,687 | 14,006 +  | 1 |
| GenelD:11845    | Arf6          | 12 | 69,372,150 | 69,375,980 | 3,830 +   | 1 |
| GenelD:207965   | Mettl21d      | 12 | 69,577,628 | 69,583,028 | 5,400 -   | 1 |
| GenelD:20663    | Sos2          | 12 | 69,583,761 | 69,681,852 | 98,091 -  | 2 |
| GenelD:217666   | L2hgdh        | 12 | 69,690,436 | 69,724,874 | 34,438 -  | 1 |
| GenelD:399510   | Map4k5        | 12 | 69,803,757 | 69,893,163 | 89,406 -  | 1 |
| GenelD:73991    | Atl1          | 12 | 69,893,105 | 69,964,085 | 70,980 +  | 1 |
| GenelD:64010    | Sav1          | 12 | 69,965,012 | 69,987,002 | 21,990 -  | 1 |
| GenelD:18080    | Nin           | 12 | 70,011,435 | 70,111,925 | 100,490 - | 1 |
| GenelD:110095   | Pygl          | 12 | 70,190,815 | 70,227,683 | 36,868 -  | 1 |
| GenelD:414124   | F730035M05Rik | 12 | 70,227,841 | 70,234,165 | 6,324 +   | 1 |
| GenelD:94090    | Trim9         | 12 | 70,244,533 | 70,347,614 | 103,081 - | 1 |
| GenelD:319710   | Frmd6         | 12 | 70,825,514 | 70,902,234 | 76,720 +  | 1 |
| GenelD:73204    | 3110056K07Rik | 12 | 70,991,615 | 71,015,823 | 24,208 -  | 1 |
| GenelD:238247   | Arid4a        | 12 | 71,015,967 | 71,099,351 | 83,384 +  | 1 |
| GenelD:30056    | Timm9         | 12 | 71,123,172 | 71,136,675 | 13,503 -  | 1 |
| GenelD:76967    | 2700049A03Rik | 12 | 71,136,848 | 71,243,303 | 106,455 + | 1 |
| GenelD:59036    | Dact1         | 12 | 71,309,884 | 71,320,107 | 10,223 +  | 1 |
| GenelD:10105573 | LOC101055739  | 12 | 71,316,865 | 71,321,660 | 4,795 -   | 1 |
| GenelD:208846   | Daam1         | 12 | 71,831,078 | 71,992,367 | 161,289 + | 1 |
| GenelD:238252   | Gpr135        | 12 | 72,069,618 | 72,070,991 | 1,373 -   | 1 |
| GenelD:67217    | L3hypdh       | 12 | 72,073,428 | 72,085,313 | 11,885 -  | 3 |
| GenelD:104771   | Jkamp         | 12 | 72,085,839 | 72,101,527 | 15,688 +  | 2 |
| GenelD:19042    | Ppm1a         | 12 | 72,761,211 | 72,794,940 | 33,729 +  | 2 |
| GenelD:76357    | Trmt5         | 12 | 73,280,410 | 73,286,711 | 6,301 -   | 1 |
| GenelD:625098   | Slc38a6       | 12 | 73,286,848 | 73,354,045 | 67,197 +  | 1 |
| GenelD:238257   | Tmem30b       | 12 | 73,543,114 | 73,546,395 | 3,281 -   | 1 |
| GenelD:73644    | 2210039B01Rik | 12 | 73,548,483 | 73,551,986 | 3,503 +   | 1 |
| GenelD:18755    | Prkch         | 12 | 73,585,041 | 73,778,185 | 193,144 + | 1 |
| GenelD:15251    | Hif1a         | 12 | 73,907,867 | 73,947,530 | 39,663 +  | 1 |
| GenelD:10050445 | Gm20235       | 12 | 73,910,555 | 73,914,501 | 3,946 +   | 1 |
| GenelD:277089   | Gm5068        | 12 | 73,949,004 | 73,961,447 | 12,443 +  | 1 |
| GenelD:75627    | Snapc1        | 12 | 73,964,530 | 73,984,820 | 20,290 +  | 1 |
| GenelD:26932    | Ppp2r5e       | 12 | 75,450,881 | 75,596,200 | 145,319 - | 1 |
| GenelD:81535    | Sgpp1         | 12 | 75,714,248 | 75,735,729 | 21,481 -  | 1 |
| GenelD:319565   | Syne2         | 12 | 75,818,318 | 76,110,928 | 292,610 + | 1 |
| GenelD:109929   | Zbtb25        | 12 | 76,348,900 | 76,369,560 | 20,660 -  | 1 |
| GenelD:268564   | Zbtb1         | 12 | 76,370,266 | 76,388,747 | 18,481 +  | 1 |

|                 |               |    |            |            |           |   |
|-----------------|---------------|----|------------|------------|-----------|---|
| GenelD:10050451 | 4930426I24Rik | 12 | 76,402,738 | 76,403,982 | 1,244 -   | 1 |
| GenelD:15512    | Hspa2         | 12 | 76,404,176 | 76,406,938 | 2,762 +   | 1 |
| GenelD:10062860 | Mir5135       | 12 | 76,533,134 | 76,533,212 | 78 -      | 1 |
| GenelD:263406   | Plekhg3       | 12 | 76,533,560 | 76,579,039 | 45,479 +  | 1 |
| GenelD:20741    | Sptb          | 12 | 76,580,488 | 76,710,547 | 130,059 - | 1 |
| GenelD:17187    | Max           | 12 | 76,937,269 | 76,962,248 | 24,979 -  | 1 |
| GenelD:53618    | Fut8          | 12 | 77,238,104 | 77,475,996 | 237,892 + | 1 |
| GenelD:268566   | Gphn          | 12 | 78,226,655 | 78,684,772 | 458,117 + | 1 |
| GenelD:56217    | Mpp5          | 12 | 78,748,947 | 78,840,714 | 91,767 +  | 1 |
| GenelD:268567   | Tmem229b      | 12 | 78,961,795 | 79,007,277 | 45,482 -  | 1 |
| GenelD:211945   | Plekhh1       | 12 | 79,029,163 | 79,081,655 | 52,492 +  | 2 |
| GenelD:110417   | Pigh          | 12 | 79,080,669 | 79,089,670 | 9,001 -   | 1 |
| GenelD:53612    | Vti1b         | 12 | 79,156,017 | 79,172,458 | 16,441 -  | 1 |
| GenelD:17252    | Rdh11         | 12 | 79,175,551 | 79,191,819 | 16,268 -  | 1 |
| GenelD:12192    | Zfp36l1       | 12 | 80,107,760 | 80,113,013 | 5,253 -   | 3 |
| GenelD:69548    | 2310015A10Rik | 12 | 80,120,546 | 80,132,844 | 12,298 -  | 3 |
| GenelD:109711   | Actn1         | 12 | 80,167,542 | 80,260,371 | 92,829 -  | 1 |
| GenelD:320808   | Dcaf5         | 12 | 80,335,847 | 80,436,601 | 100,754 - | 1 |
| GenelD:97827    | Exd2          | 12 | 80,463,095 | 80,498,135 | 35,040 +  | 1 |
| GenelD:69522    | 2310002D06Rik | 12 | 80,507,206 | 80,517,954 | 10,748 +  | 2 |
| GenelD:108760   | Galnt16       | 12 | 80,518,990 | 80,603,896 | 84,906 +  | 2 |
| GenelD:13877    | Erh           | 12 | 80,634,023 | 80,643,861 | 9,838 -   | 1 |
| GenelD:328133   | Slc39a9       | 12 | 80,644,215 | 80,683,342 | 39,127 +  | 2 |
| GenelD:68354    | 0610009B14Rik | 12 | 80,686,375 | 80,693,952 | 7,577 -   | 1 |
| GenelD:217682   | Plekhd1       | 12 | 80,692,601 | 80,724,216 | 31,615 +  | 1 |
| GenelD:380768   | Ccdc177       | 12 | 80,755,447 | 80,760,715 | 5,268 -   | 2 |
| GenelD:217684   | 4933426M11Rik | 12 | 80,790,532 | 80,880,833 | 90,301 +  | 1 |
| GenelD:10050466 | Gm20337       | 12 | 80,942,652 | 80,945,399 | 2,747 -   | 1 |
| GenelD:20384    | Srsf5         | 12 | 80,945,504 | 80,950,507 | 5,003 +   | 1 |
| GenelD:20493    | Slc10a1       | 12 | 80,953,185 | 80,968,079 | 14,894 -  | 1 |
| GenelD:64075    | Smoc1         | 12 | 81,026,808 | 81,186,414 | 159,606 + | 1 |
| GenelD:54604    | Pcnx          | 12 | 81,860,030 | 82,000,924 | 140,894 + | 1 |
| GenelD:217692   | Sipa1l1       | 12 | 82,170,016 | 82,451,786 | 281,770 + | 1 |
| GenelD:70127    | Dpf3          | 12 | 83,213,751 | 83,487,736 | 273,985 - | 1 |
| GenelD:217695   | Zfyve1        | 12 | 83,546,941 | 83,597,147 | 50,206 -  | 1 |
| GenelD:67039    | Rbm25         | 12 | 83,632,234 | 83,683,123 | 50,889 +  | 1 |
| GenelD:19164    | Psen1         | 12 | 83,688,563 | 83,735,199 | 46,636 +  | 1 |
| GenelD:10105567 | LOC101055670  | 12 | 83,945,213 | 83,984,852 | 39,639 -  | 2 |
| GenelD:10105581 | LOC101055814  | 12 | 83,950,304 | 83,951,355 | 1,051 -   | 1 |
| GenelD:71952    | 2410016O06Rik | 12 | 83,950,608 | 83,952,953 | 2,345 +   | 1 |
| GenelD:171210   | Acot2         | 12 | 83,987,861 | 83,993,877 | 6,016 +   | 1 |
| GenelD:217700   | Acot6         | 12 | 84,100,654 | 84,109,783 | 9,129 +   | 1 |
| GenelD:238317   | Elmsan1       | 12 | 84,149,168 | 84,218,881 | 69,713 -  | 2 |
| GenelD:10050269 | Gm19327       | 12 | 84,184,465 | 84,187,806 | 3,341 -   | 1 |
| GenelD:217705   | Fam161b       | 12 | 84,345,317 | 84,361,821 | 16,504 -  | 1 |
| GenelD:217707   | Coq6          | 12 | 84,361,968 | 84,373,796 | 11,828 +  | 1 |
| GenelD:12499    | Entpd5        | 12 | 84,373,857 | 84,409,029 | 35,172 -  | 2 |

|                 |               |    |             |             |           |   |
|-----------------|---------------|----|-------------|-------------|-----------|---|
| GenelD:72873    | Ccdc176       | 12 | 84,409,068  | 84,433,780  | 24,712 +  | 2 |
| GenelD:66381    | Rnf113a2      | 12 | 84,417,200  | 84,418,578  | 1,378 +   | 2 |
| GenelD:627191   | Syndig1l      | 12 | 84,677,278  | 84,698,807  | 21,529 -  | 1 |
| GenelD:16997    | Ltbp2         | 12 | 84,783,212  | 84,876,495  | 93,283 -  | 1 |
| GenelD:10030373 | D030025P21Rik | 12 | 84,875,802  | 84,879,755  | 3,953 +   | 1 |
| GenelD:56531    | Ylpm1         | 12 | 84,996,321  | 85,070,515  | 74,194 +  | 1 |
| GenelD:73422    | Prox2         | 12 | 85,086,814  | 85,106,431  | 19,617 -  | 1 |
| GenelD:78920    | Dlst          | 12 | 85,110,833  | 85,134,091  | 23,258 +  | 1 |
| GenelD:217718   | Nek9          | 12 | 85,299,514  | 85,339,362  | 39,848 -  | 1 |
| GenelD:68581    | Tmed10        | 12 | 85,340,614  | 85,374,717  | 34,103 -  | 1 |
| GenelD:14281    | Fos           | 12 | 85,473,901  | 85,477,269  | 3,368 +   | 1 |
| GenelD:10105567 | LOC101055678  | 12 | 85,597,448  | 85,599,337  | 1,889 -   | 1 |
| GenelD:81703    | Jdp2          | 12 | 85,599,105  | 85,639,878  | 40,773 +  | 1 |
| GenelD:217721   | Mfsd7c        | 12 | 85,746,539  | 85,813,585  | 67,046 +  | 1 |
| GenelD:238328   | Vash1         | 12 | 86,678,700  | 86,695,681  | 16,981 +  | 1 |
| GenelD:238330   | Irf2bpl       | 12 | 86,880,703  | 86,884,814  | 4,111 -   | 1 |
| GenelD:217734   | Pomt2         | 12 | 87,106,866  | 87,147,902  | 41,036 -  | 1 |
| GenelD:14874    | Gstz1         | 12 | 87,147,165  | 87,164,723  | 17,558 +  | 1 |
| GenelD:382620   | Tmed8         | 12 | 87,166,242  | 87,200,229  | 33,987 -  | 1 |
| GenelD:238333   | Samd15        | 12 | 87,200,340  | 87,213,373  | 13,033 +  | 1 |
| GenelD:217738   | Ism2          | 12 | 87,279,682  | 87,295,072  | 15,390 -  | 1 |
| GenelD:20773    | Sptlc2        | 12 | 87,307,889  | 87,388,230  | 80,341 -  | 2 |
| GenelD:211064   | Alkbh1        | 12 | 87,428,077  | 87,443,839  | 15,762 -  | 1 |
| GenelD:10052654 | Mir3068       | 12 | 87,437,679  | 87,437,757  | 78 -      | 1 |
| GenelD:654309   | Nrp           | 12 | 87,442,848  | 87,444,017  | 1,169 -   | 1 |
| GenelD:380773   | Slirp         | 12 | 87,443,896  | 87,449,924  | 6,028 +   | 1 |
| GenelD:66354    | Snw1          | 12 | 87,449,910  | 87,472,299  | 22,389 -  | 1 |
| GenelD:75216    | Cep128        | 12 | 90,998,492  | 91,384,409  | 385,917 - | 1 |
| GenelD:83602    | Gtf2a1        | 12 | 91,555,262  | 91,590,487  | 35,225 -  | 1 |
| GenelD:108800   | Ston2         | 12 | 91,633,009  | 91,786,436  | 153,427 - | 1 |
| GenelD:399558   | Flrt2         | 12 | 95,692,226  | 95,785,215  | 92,989 +  | 1 |
| GenelD:14420    | Galc          | 12 | 98,202,300  | 98,259,337  | 57,037 -  | 1 |
| GenelD:14744    | Gpr65         | 12 | 98,268,657  | 98,276,632  | 7,975 +   | 1 |
| GenelD:72258    | Kcnk10        | 12 | 98,433,994  | 98,577,940  | 143,946 - | 1 |
| GenelD:24000    | Ptpn21        | 12 | 98,676,741  | 98,737,405  | 60,664 -  | 1 |
| GenelD:75553    | Zc3h14        | 12 | 98,746,968  | 98,787,774  | 40,806 +  | 1 |
| GenelD:319670   | Eml5          | 12 | 98,786,604  | 98,901,484  | 114,880 - | 1 |
| GenelD:71375    | Foxn3         | 12 | 99,195,094  | 99,450,074  | 254,980 - | 1 |
| GenelD:73457    | 1700064M15Rik | 12 | 99,626,053  | 99,627,974  | 1,921 -   | 1 |
| GenelD:78767    | Efcab11       | 12 | 99,717,531  | 99,883,442  | 165,911 - | 1 |
| GenelD:104884   | Tdp1          | 12 | 99,884,515  | 99,955,219  | 70,704 +  | 2 |
| GenelD:217826   | Kcnk13        | 12 | 99,964,499  | 100,062,682 | 98,183 +  | 1 |
| GenelD:19179    | Psmc1         | 12 | 100,110,202 | 100,123,364 | 13,162 +  | 1 |
| GenelD:10003837 | Gm10433       | 12 | 100,187,968 | 100,193,538 | 5,570 +   | 2 |
| GenelD:12313    | Calm1         | 12 | 100,199,541 | 100,209,806 | 10,265 +  | 1 |
| GenelD:73086    | Rps6ka5       | 12 | 100,549,778 | 100,725,028 | 175,250 - | 1 |
| GenelD:68339    | Ccdc88c       | 12 | 100,912,700 | 101,028,983 | 116,283 - | 1 |



|                 |               |    |             |             |           |   |
|-----------------|---------------|----|-------------|-------------|-----------|---|
| GenelD:10031680 | Mir1190       | 12 | 101,021,673 | 101,021,793 | 120 -     | 1 |
| GenelD:68734    | Smek1         | 12 | 101,039,409 | 101,083,702 | 44,293 -  | 2 |
| GenelD:319760   | D130020L05Rik | 12 | 101,082,451 | 101,088,927 | 6,476 +   | 1 |
| GenelD:109181   | Trip11        | 12 | 101,837,372 | 101,913,171 | 75,799 -  | 1 |
| GenelD:10050405 | Gm20036       | 12 | 101,912,667 | 101,915,653 | 2,986 +   | 1 |
| GenelD:110616   | Atxn3         | 12 | 101,918,901 | 101,958,243 | 39,342 -  | 2 |
| GenelD:217835   | Rin3          | 12 | 102,283,074 | 102,390,854 | 107,780 + | 1 |
| GenelD:217837   | Itpk1         | 12 | 102,568,583 | 102,704,869 | 136,286 - | 1 |
| GenelD:10085993 | Gm20604       | 12 | 102,739,830 | 102,757,810 | 17,980 -  | 1 |
| GenelD:10023317 | AK010878      | 12 | 102,753,275 | 102,757,810 | 4,535 -   | 1 |
| GenelD:66622    | Ubr7          | 12 | 102,757,975 | 102,777,701 | 19,726 +  | 1 |
| GenelD:238386   | Btbd7         | 12 | 102,784,648 | 102,878,406 | 93,758 -  | 1 |
| GenelD:217843   | Unc79         | 12 | 102,948,859 | 103,183,997 | 235,138 + | 1 |
| GenelD:27225    | Ddx24         | 12 | 103,407,976 | 103,425,867 | 17,891 -  | 1 |
| GenelD:52668    | Ifi2711       | 12 | 103,434,189 | 103,440,245 | 6,056 +   | 1 |
| GenelD:14836    | Gsc           | 12 | 104,471,209 | 104,473,236 | 2,027 -   | 1 |
| GenelD:791311   | Gm10000       | 12 | 104,474,488 | 104,477,489 | 3,001 +   | 1 |
| GenelD:192119   | Dicer1        | 12 | 104,687,742 | 104,751,952 | 64,210 -  | 1 |
| GenelD:268595   | D430019H16Rik | 12 | 105,453,856 | 105,493,095 | 39,239 +  | 1 |
| GenelD:76559    | Atg2b         | 12 | 105,613,539 | 105,685,241 | 71,702 -  | 1 |
| GenelD:66787    | Gskip         | 12 | 105,685,352 | 105,703,058 | 17,706 +  | 1 |
| GenelD:78801    | Ak7           | 12 | 105,705,982 | 105,782,447 | 76,465 +  | 1 |
| GenelD:18789    | Papola        | 12 | 105,784,702 | 105,838,944 | 54,242 +  | 1 |
| GenelD:58208    | Bcl11b        | 12 | 107,910,403 | 108,003,414 | 93,011 -  | 1 |
| GenelD:10050315 | Gm19576       | 12 | 107,984,500 | 107,989,016 | 4,516 -   | 1 |
| GenelD:52690    | Setd3         | 12 | 108,106,431 | 108,179,284 | 72,853 -  | 1 |
| GenelD:12454    | Ccnk          | 12 | 108,179,738 | 108,203,359 | 23,621 +  | 1 |
| GenelD:668158   | Ccdc85c       | 12 | 108,206,345 | 108,275,417 | 69,072 -  | 1 |
| GenelD:68519    | Eml1          | 12 | 108,410,655 | 108,539,564 | 128,909 + | 1 |
| GenelD:10050446 | Gm16596       | 12 | 108,536,402 | 108,555,618 | 19,216 -  | 1 |
| GenelD:14026    | Evl           | 12 | 108,554,720 | 108,688,516 | 133,796 + | 1 |
| GenelD:22632    | Yy1           | 12 | 108,793,311 | 108,816,632 | 23,321 +  | 2 |
| GenelD:214663   | Slc25a29      | 12 | 108,825,878 | 108,835,876 | 9,998 -   | 1 |
| GenelD:723946   | Mir345        | 12 | 108,836,973 | 108,837,068 | 95 +      | 1 |
| GenelD:212198   | Wdr25         | 12 | 108,894,272 | 109,028,452 | 134,180 + | 1 |
| GenelD:380785   | Begain        | 12 | 109,032,182 | 109,068,217 | 36,035 -  | 1 |
| GenelD:13386    | Dlk1          | 12 | 109,452,823 | 109,463,336 | 10,513 +  | 1 |
| GenelD:26931    | Ppp2r5c       | 12 | 110,447,179 | 110,583,061 | 135,882 + | 1 |
| GenelD:77271    | 9430024F10Rik | 12 | 110,590,512 | 110,593,292 | 2,780 -   | 1 |
| GenelD:319786   | B930059L03Rik | 12 | 110,591,374 | 110,592,679 | 1,305 +   | 1 |
| GenelD:13424    | Dync1h1       | 12 | 110,601,395 | 110,666,944 | 65,549 +  | 1 |
| GenelD:15519    | Hsp90aa1      | 12 | 110,691,036 | 110,696,395 | 5,359 -   | 1 |
| GenelD:26448    | Stk30         | 12 | 110,807,798 | 110,840,939 | 33,141 -  | 1 |
| GenelD:72805    | Zfp839        | 12 | 110,850,279 | 110,869,998 | 19,719 +  | 1 |
| GenelD:10004164 | Mpc1-ps       | 12 | 110,858,070 | 110,858,954 | 884 -     | 1 |
| GenelD:104859   | Tecpr2        | 12 | 110,889,264 | 110,972,394 | 83,130 +  | 1 |
| GenelD:74251    | Ankrd9        | 12 | 110,975,353 | 110,979,021 | 3,668 -   | 1 |

|                 |               |    |             |             |           |   |
|-----------------|---------------|----|-------------|-------------|-----------|---|
| GenelD:217864   | Rcor1         | 12 | 111,039,798 | 111,113,389 | 73,591 +  | 2 |
| GenelD:22031    | Traf3         | 12 | 111,166,548 | 111,267,148 | 100,600 + | 2 |
| GenelD:93835    | Amn           | 12 | 111,271,111 | 111,276,426 | 5,315 +   | 1 |
| GenelD:10050332 | A230087F16Rik | 12 | 111,284,759 | 111,293,988 | 9,229 +   | 1 |
| GenelD:217866   | Cdc42bpb      | 12 | 111,292,972 | 111,377,718 | 84,746 -  | 1 |
| GenelD:212539   | Gm266         | 12 | 111,484,609 | 111,485,823 | 1,214 -   | 1 |
| GenelD:217869   | Eif5          | 12 | 111,538,101 | 111,546,753 | 8,652 +   | 1 |
| GenelD:10031693 | Snora28       | 12 | 111,540,946 | 111,541,067 | 121 +     | 1 |
| GenelD:10050468 | 2810029C07Rik | 12 | 111,572,317 | 111,574,402 | 2,085 -   | 1 |
| GenelD:17169    | Mark3         | 12 | 111,574,510 | 111,656,227 | 81,717 +  | 1 |
| GenelD:12709    | Ckb           | 12 | 111,669,355 | 111,672,338 | 2,983 -   | 2 |
| GenelD:328162   | Trmt61a       | 12 | 111,678,105 | 111,683,902 | 5,797 +   | 2 |
| GenelD:68020    | Apopt1        | 12 | 111,713,269 | 111,755,055 | 41,786 +  | 1 |
| GenelD:16593    | Klc1          | 12 | 111,758,849 | 111,806,775 | 47,926 +  | 2 |
| GenelD:74335    | Xrcc3         | 12 | 111,803,193 | 111,813,841 | 10,648 -  | 1 |
| GenelD:68520    | Zfyve21       | 12 | 111,814,170 | 111,828,388 | 14,218 +  | 1 |
| GenelD:21981    | Ppp1r13b      | 12 | 111,828,458 | 111,908,055 | 79,597 -  | 1 |
| GenelD:668303   | Kif26a        | 12 | 112,146,208 | 112,181,747 | 35,539 +  | 1 |
| GenelD:70435    | Inf2          | 12 | 112,588,784 | 112,615,557 | 26,773 +  | 1 |
| GenelD:11565    | Adssl1        | 12 | 112,620,047 | 112,641,355 | 21,308 +  | 1 |
| GenelD:30954    | Siva1         | 12 | 112,644,828 | 112,649,152 | 4,324 +   | 2 |
| GenelD:11651    | Akt1          | 12 | 112,653,821 | 112,674,276 | 20,455 -  | 4 |
| GenelD:382639   | Zbtb42        | 12 | 112,678,840 | 112,682,747 | 3,907 +   | 2 |
| GenelD:217882   | Cep170b       | 12 | 112,722,174 | 112,746,591 | 24,417 +  | 2 |
| GenelD:10105582 | LOC101055828  | 12 | 112,772,193 | 112,802,526 | 30,333 -  | 1 |
| GenelD:217887   | BC022687      | 12 | 112,808,975 | 112,816,245 | 7,270 +   | 1 |
| GenelD:71963    | Cdca4         | 12 | 112,820,234 | 112,829,389 | 9,155 -   | 1 |
| GenelD:16450    | Jag2          | 12 | 112,908,590 | 112,929,495 | 20,905 -  | 1 |
| GenelD:66174    | Nudt14        | 12 | 112,934,733 | 112,942,118 | 7,385 -   | 2 |
| GenelD:72308    | Brf1          | 12 | 112,959,862 | 113,000,621 | 40,759 -  | 3 |
| GenelD:399566   | Btbd6         | 12 | 112,976,482 | 112,978,940 | 2,458 +   | 1 |
| GenelD:217893   | Pacs2         | 12 | 113,014,508 | 113,074,401 | 59,893 +  | 2 |
| GenelD:116870   | Mta1          | 12 | 113,098,278 | 113,137,206 | 38,928 +  | 1 |
| GenelD:68337    | Crip2         | 12 | 113,140,236 | 113,145,506 | 5,270 +   | 1 |
| GenelD:69195    | Tmem121       | 12 | 113,185,903 | 113,189,523 | 3,620 +   | 1 |
| GenelD:56220    | Zfp386        | 12 | 116,047,724 | 116,060,597 | 12,873 +  | 1 |
| GenelD:217946   | Cdca7l        | 12 | 117,843,861 | 117,878,706 | 34,845 +  | 1 |
| GenelD:20688    | Sp4           | 12 | 118,234,933 | 118,301,440 | 66,507 -  | 1 |
| GenelD:320145   | Sp8           | 12 | 118,846,329 | 118,852,578 | 6,249 +   | 1 |
| GenelD:14569    | Gdi2          | 13 | 3,538,075   | 3,566,261   | 28,186 +  | 1 |
| GenelD:105203   | BC016423      | 13 | 3,566,035   | 3,611,108   | 45,073 -  | 1 |
| GenelD:69237    | Gtpbp4        | 13 | 8,972,464   | 8,996,012   | 23,548 -  | 1 |
| GenelD:217980   | Larp4b        | 13 | 9,093,905   | 9,173,109   | 79,204 +  | 1 |
| GenelD:66505    | Zmynd11       | 13 | 9,684,836   | 9,765,314   | 80,478 -  | 2 |
| GenelD:238505   | Mtr           | 13 | 12,186,538  | 12,258,113  | 71,575 -  | 1 |
| GenelD:10003982 | Gm2444        | 13 | 12,259,448  | 12,260,839  | 1,391 -   | 1 |
| GenelD:17101    | Lyst          | 13 | 13,590,409  | 13,777,440  | 187,031 + | 1 |

|                 |               |    |            |            |           |   |
|-----------------|---------------|----|------------|------------|-----------|---|
| GenelD:94253    | Hecw1         | 13 | 14,226,438 | 14,523,226 | 296,788 - | 1 |
| GenelD:75398    | Mrpl32        | 13 | 14,610,301 | 14,613,037 | 2,736 -   | 1 |
| GenelD:19166    | Psma2         | 13 | 14,613,242 | 14,625,673 | 12,431 +  | 1 |
| GenelD:14634    | Gli3          | 13 | 15,463,723 | 15,730,026 | 266,303 + | 1 |
| GenelD:16323    | Inhba         | 13 | 16,014,475 | 16,027,211 | 12,736 +  | 2 |
| GenelD:69562    | Cdk13         | 13 | 17,715,962 | 17,805,097 | 89,135 -  | 1 |
| GenelD:76205    | Stard3nl      | 13 | 19,357,676 | 19,395,752 | 38,076 -  | 1 |
| GenelD:105298   | Epdr1         | 13 | 19,591,708 | 19,619,830 | 28,122 -  | 1 |
| GenelD:20379    | Sfrp4         | 13 | 19,623,175 | 19,632,825 | 9,650 +   | 1 |
| GenelD:140580   | Elmo1         | 13 | 20,090,507 | 20,608,353 | 517,846 + | 1 |
| GenelD:19720    | Trim27        | 13 | 21,179,931 | 21,194,723 | 14,792 +  | 1 |
| GenelD:93681    | Zkscan8       | 13 | 21,513,221 | 21,531,114 | 17,893 -  | 1 |
| GenelD:258280   | Olfr1366      | 13 | 21,536,974 | 21,538,027 | 1,053 -   | 1 |
| GenelD:56702    | Hist1h1b      | 13 | 21,779,883 | 21,780,554 | 671 -     | 1 |
| GenelD:319153   | Hist1h3i      | 13 | 21,782,915 | 21,783,397 | 482 -     | 1 |
| GenelD:319170   | Hist1h2an     | 13 | 21,786,826 | 21,787,218 | 392 -     | 1 |
| GenelD:319188   | Hist1h2bp     | 13 | 21,787,488 | 21,789,213 | 1,725 +   | 1 |
| GenelD:68732    | Lrrc16a       | 13 | 24,012,484 | 24,280,790 | 268,306 - | 1 |
| GenelD:79555    | BC005537      | 13 | 24,801,657 | 24,812,899 | 11,242 +  | 1 |
| GenelD:66834    | Acot13        | 13 | 24,817,955 | 24,831,489 | 13,534 -  | 1 |
| GenelD:56196    | Tdp2          | 13 | 24,831,659 | 24,842,153 | 10,494 +  | 1 |
| GenelD:20677    | Sox4          | 13 | 28,950,716 | 28,953,682 | 2,966 -   | 2 |
| GenelD:13557    | E2f3          | 13 | 29,906,575 | 29,986,063 | 79,488 -  | 1 |
| GenelD:218121   | Mboat1        | 13 | 30,136,490 | 30,246,694 | 110,204 + | 1 |
| GenelD:66694    | Uqcrfs1       | 13 | 30,540,312 | 30,545,316 | 5,004 -   | 1 |
| GenelD:15220    | Foxq1         | 13 | 31,558,170 | 31,560,976 | 2,806 +   | 2 |
| GenelD:71307    | 1700018A04Rik | 13 | 31,565,492 | 31,582,513 | 17,021 -  | 2 |
| GenelD:14238    | Foxf2         | 13 | 31,625,816 | 31,631,406 | 5,590 +   | 1 |
| GenelD:17300    | Foxc1         | 13 | 31,806,646 | 31,810,635 | 3,989 +   | 1 |
| GenelD:75300    | 4930548F15Rik | 13 | 31,811,162 | 31,812,476 | 1,314 +   | 1 |
| GenelD:20719    | Serpinb6a     | 13 | 33,917,918 | 34,002,794 | 84,876 -  | 1 |
| GenelD:68808    | 1110046J04Rik | 13 | 33,936,032 | 33,960,181 | 24,149 +  | 1 |
| GenelD:68021    | Bphl          | 13 | 34,037,641 | 34,074,074 | 36,433 +  | 1 |
| GenelD:22151    | Tubb2a        | 13 | 34,074,278 | 34,078,008 | 3,730 -   | 1 |
| GenelD:432745   | 4930447K03Rik | 13 | 34,084,155 | 34,113,272 | 29,117 -  | 1 |
| GenelD:66895    | Pxdc1         | 13 | 34,627,841 | 34,652,681 | 24,840 -  | 1 |
| GenelD:10105614 | LOC101056149  | 13 | 34,652,923 | 34,666,774 | 13,851 +  | 1 |
| GenelD:19134    | Prpf4b        | 13 | 34,875,494 | 34,902,878 | 27,384 +  | 1 |
| GenelD:12593    | Cdyl          | 13 | 35,659,862 | 35,874,064 | 214,202 + | 2 |
| GenelD:380840   | Lym4          | 13 | 35,978,797 | 36,117,357 | 138,560 - | 1 |
| GenelD:69955    | Fars2         | 13 | 36,117,411 | 36,537,593 | 420,182 + | 1 |
| GenelD:68750    | Rreb1         | 13 | 37,826,038 | 37,952,005 | 125,967 + | 2 |
| GenelD:107513   | Ssr1          | 13 | 37,971,401 | 37,994,190 | 22,789 -  | 1 |
| GenelD:71213    | Cage1         | 13 | 38,006,052 | 38,036,937 | 30,885 -  | 1 |
| GenelD:71340    | Riok1         | 13 | 38,036,989 | 38,061,433 | 24,444 +  | 1 |
| GenelD:109620   | Dsp           | 13 | 38,151,294 | 38,198,577 | 47,283 +  | 1 |
| GenelD:12161    | Bmp6          | 13 | 38,345,716 | 38,499,728 | 154,012 + | 2 |

|                 |               |    |            |            |           |   |
|-----------------|---------------|----|------------|------------|-----------|---|
| GenelD:105245   | Txndc5        | 13 | 38,500,275 | 38,528,460 | 28,185 -  | 1 |
| GenelD:66143    | Eef1e1        | 13 | 38,645,691 | 38,659,028 | 13,337 -  | 1 |
| GenelD:108652   | Slc35b3       | 13 | 38,932,140 | 38,960,875 | 28,735 -  | 1 |
| GenelD:21418    | Tfap2a        | 13 | 40,715,675 | 40,733,823 | 18,148 -  | 1 |
| GenelD:68083    | Pak1ip1       | 13 | 41,001,010 | 41,013,033 | 12,023 +  | 1 |
| GenelD:66154    | Tmem14c       | 13 | 41,016,250 | 41,022,582 | 6,332 +   | 1 |
| GenelD:17152    | Mak           | 13 | 41,025,120 | 41,079,706 | 54,586 -  | 1 |
| GenelD:54326    | Elovl2        | 13 | 41,182,382 | 41,220,403 | 38,021 -  | 1 |
| GenelD:110521   | Hivep1        | 13 | 42,052,021 | 42,185,026 | 133,005 + | 2 |
| GenelD:328232   | Gfod1         | 13 | 43,195,519 | 43,304,172 | 108,653 - | 1 |
| GenelD:68346    | Sirt5         | 13 | 43,365,535 | 43,395,203 | 29,668 +  | 1 |
| GenelD:70078    | Nol7          | 13 | 43,398,376 | 43,402,858 | 4,482 +   | 1 |
| GenelD:56705    | Ranbp9        | 13 | 43,402,673 | 43,480,973 | 78,300 -  | 2 |
| GenelD:94245    | Dtnbp1        | 13 | 44,922,079 | 45,002,096 | 80,017 -  | 1 |
| GenelD:218203   | Mylip         | 13 | 45,389,742 | 45,411,940 | 22,198 +  | 1 |
| GenelD:20238    | Atxn1         | 13 | 45,549,755 | 45,964,991 | 415,236 - | 1 |
| GenelD:76000    | 5033430I15Rik | 13 | 45,965,259 | 45,966,507 | 1,248 +   | 1 |
| GenelD:97863    | C78339        | 13 | 46,669,522 | 46,675,773 | 6,251 +   | 1 |
| GenelD:218210   | Nup153        | 13 | 46,679,902 | 46,727,849 | 47,947 -  | 2 |
| GenelD:16553    | Kif13a        | 13 | 46,749,087 | 46,929,718 | 180,631 - | 1 |
| GenelD:22017    | Tpmt          | 13 | 47,023,543 | 47,043,217 | 19,674 -  | 1 |
| GenelD:218214   | Kdm1b         | 13 | 47,043,499 | 47,085,279 | 41,780 +  | 1 |
| GenelD:320614   | A330033J07Rik | 13 | 48,044,231 | 48,262,963 | 218,732 - | 2 |
| GenelD:15904    | Id4           | 13 | 48,261,427 | 48,264,036 | 2,609 +   | 1 |
| GenelD:320315   | A330048O09Rik | 13 | 48,272,418 | 48,273,884 | 1,466 -   | 1 |
| GenelD:218236   | Fam120a       | 13 | 48,879,216 | 48,967,828 | 88,612 -  | 2 |
| GenelD:68128    | Fam120aos     | 13 | 48,968,112 | 48,969,905 | 1,793 +   | 2 |
| GenelD:68480    | 1110007C09Rik | 13 | 49,202,951 | 49,216,026 | 13,075 -  | 1 |
| GenelD:76895    | Bicd2         | 13 | 49,341,549 | 49,387,025 | 45,476 +  | 1 |
| GenelD:75678    | Ippk          | 13 | 49,421,311 | 49,462,990 | 41,679 +  | 1 |
| GenelD:66336    | Cenpp         | 13 | 49,464,059 | 49,652,731 | 188,672 - | 1 |
| GenelD:70930    | Nol8          | 13 | 49,653,350 | 49,679,015 | 25,665 +  | 1 |
| GenelD:109082   | Fbxw17        | 13 | 50,417,877 | 50,433,769 | 15,892 +  | 1 |
| GenelD:77428    | 9430083A17Rik | 13 | 51,097,738 | 51,100,727 | 2,989 -   | 1 |
| GenelD:20729    | Spin1         | 13 | 51,100,898 | 51,152,546 | 51,648 +  | 1 |
| GenelD:66197    | Cks2          | 13 | 51,645,232 | 51,650,662 | 5,430 +   | 2 |
| GenelD:75420    | Secisbp2      | 13 | 51,651,714 | 51,683,646 | 31,932 +  | 2 |
| GenelD:23882    | Gadd45g       | 13 | 51,846,675 | 51,848,475 | 1,800 +   | 1 |
| GenelD:11992    | Auh           | 13 | 52,835,110 | 52,929,677 | 94,567 -  | 1 |
| GenelD:18030    | Nfil3         | 13 | 52,967,209 | 52,981,039 | 13,830 -  | 2 |
| GenelD:26564    | Ror2          | 13 | 53,109,317 | 53,286,109 | 176,792 - | 1 |
| GenelD:17702    | Msx2          | 13 | 53,466,881 | 53,472,780 | 5,899 -   | 1 |
| GenelD:73666    | Thoc3         | 13 | 54,458,837 | 54,468,840 | 10,003 -  | 1 |
| GenelD:10004054 | Gm2830        | 13 | 54,499,591 | 54,500,089 | 498 -     | 1 |
| GenelD:319719   | Simc1         | 13 | 54,503,805 | 54,551,290 | 47,485 +  | 1 |
| GenelD:97820    | 4833439L19Rik | 13 | 54,551,218 | 54,565,382 | 14,164 -  | 1 |
| GenelD:56795    | Arl10         | 13 | 54,575,013 | 54,581,128 | 6,115 +   | 1 |

|               |               |    |            |            |           |   |
|---------------|---------------|----|------------|------------|-----------|---|
| GenelD:28126  | Nop16         | 13 | 54,584,191 | 54,590,074 | 5,883 -   | 1 |
| GenelD:74325  | Cltb          | 13 | 54,592,939 | 54,611,272 | 18,333 -  | 1 |
| GenelD:105239 | Rnf44         | 13 | 54,679,399 | 54,693,960 | 14,561 -  | 2 |
| GenelD:268663 | Cdhr2         | 13 | 54,701,463 | 54,736,662 | 35,199 +  | 1 |
| GenelD:107448 | Unc5a         | 13 | 54,949,432 | 55,006,018 | 56,586 +  | 1 |
| GenelD:14186  | Fgfr4         | 13 | 55,152,818 | 55,168,759 | 15,941 +  | 1 |
| GenelD:18193  | Nsd1          | 13 | 55,209,782 | 55,318,325 | 108,543 + | 3 |
| GenelD:19336  | Rab24         | 13 | 55,319,223 | 55,321,980 | 2,757 -   | 3 |
| GenelD:66494  | Preli1        | 13 | 55,322,055 | 55,325,272 | 3,217 +   | 3 |
| GenelD:17121  | Mxd3          | 13 | 55,325,168 | 55,329,730 | 4,562 -   | 3 |
| GenelD:26385  | Grk6          | 13 | 55,445,334 | 55,460,927 | 15,593 +  | 1 |
| GenelD:432763 | Prr7          | 13 | 55,464,267 | 55,473,155 | 8,888 +   | 2 |
| GenelD:56320  | Dnb1          | 13 | 55,473,428 | 55,488,076 | 14,648 -  | 3 |
| GenelD:67399  | Pdlim7        | 13 | 55,497,487 | 55,513,439 | 15,952 -  | 2 |
| GenelD:27261  | Dok3          | 13 | 55,523,235 | 55,528,538 | 5,303 -   | 1 |
| GenelD:67511  | Tmed9         | 13 | 55,593,135 | 55,597,697 | 4,562 +   | 1 |
| GenelD:218271 | B4galt7       | 13 | 55,600,111 | 55,609,954 | 9,843 +   | 1 |
| GenelD:12328  | Caml          | 13 | 55,623,005 | 55,632,416 | 9,411 +   | 1 |
| GenelD:212880 | Ddx46         | 13 | 55,635,027 | 55,681,256 | 46,229 +  | 1 |
| GenelD:78521  | B230219D22Rik | 13 | 55,693,124 | 55,703,500 | 10,376 +  | 1 |
| GenelD:69672  | Txndc15       | 13 | 55,714,650 | 55,726,227 | 11,577 +  | 2 |
| GenelD:72562  | Pcbd2         | 13 | 55,727,368 | 55,776,830 | 49,462 +  | 1 |
| GenelD:18740  | Pitx1         | 13 | 55,825,054 | 55,831,425 | 6,371 -   | 2 |
| GenelD:26914  | H2afy         | 13 | 56,073,622 | 56,135,550 | 61,928 -  | 2 |
| GenelD:77134  | Hnrnpa0       | 13 | 58,125,879 | 58,128,556 | 2,677 -   | 1 |
| GenelD:56085  | Ubqln1        | 13 | 58,176,156 | 58,215,653 | 39,497 -  | 1 |
| GenelD:56278  | Gkap1         | 13 | 58,233,351 | 58,274,188 | 40,837 -  | 1 |
| GenelD:70153  | 2210016F16Rik | 13 | 58,380,046 | 58,385,225 | 5,179 -   | 1 |
| GenelD:15387  | Hnrnpk        | 13 | 58,391,951 | 58,402,516 | 10,565 -  | 2 |
| GenelD:723902 | Mir7-1        | 13 | 58,392,779 | 58,392,886 | 107 -     | 2 |
| GenelD:74386  | Rmi1          | 13 | 58,402,248 | 58,411,149 | 8,901 +   | 1 |
| GenelD:319469 | A230056J06Rik | 13 | 59,580,176 | 59,585,223 | 5,047 -   | 1 |
| GenelD:78689  | Naa35         | 13 | 59,585,333 | 59,634,798 | 49,465 +  | 1 |
| GenelD:105348 | Golm1         | 13 | 59,634,996 | 59,675,784 | 40,788 -  | 1 |
| GenelD:214290 | Zcchc6        | 13 | 59,771,879 | 59,823,147 | 51,268 -  | 1 |
| GenelD:14451  | Gas1          | 13 | 60,174,405 | 60,177,535 | 3,130 -   | 1 |
| GenelD:19206  | Ptch1         | 13 | 63,511,533 | 63,565,520 | 53,987 -  | 2 |
| GenelD:238673 | Zfp367        | 13 | 64,133,057 | 64,153,199 | 20,142 -  | 2 |
| GenelD:56541  | Habp4         | 13 | 64,161,866 | 64,186,537 | 24,671 +  | 2 |
| GenelD:218294 | Cdc14b        | 13 | 64,192,545 | 64,274,988 | 82,443 -  | 1 |
| GenelD:66503  | 1810034E14Rik | 13 | 64,248,700 | 64,268,145 | 19,445 +  | 1 |
| GenelD:66129  | Aaed1         | 13 | 64,291,836 | 64,312,710 | 20,874 -  | 1 |
| GenelD:13039  | Ctsl          | 13 | 64,363,214 | 64,370,306 | 7,092 -   | 1 |
| GenelD:66631  | Hiat1         | 13 | 65,065,030 | 65,112,982 | 47,952 -  | 1 |
| GenelD:66410  | Mterfd1       | 13 | 66,912,095 | 66,933,072 | 20,977 -  | 1 |
| GenelD:19210  | Ptdss1        | 13 | 66,932,830 | 66,998,401 | 65,571 +  | 1 |
| GenelD:210044 | Adcy2         | 13 | 68,620,043 | 68,999,541 | 379,498 - | 1 |

|                 |               |    |            |            |           |   |
|-----------------|---------------|----|------------|------------|-----------|---|
| GenelD:210106   | Papd7         | 13 | 69,497,959 | 69,533,864 | 35,905 -  | 1 |
| GenelD:210373   | A530095I07Rik | 13 | 69,543,046 | 69,544,017 | 971 -     | 1 |
| GenelD:76980    | Ube2ql1       | 13 | 69,702,832 | 69,739,897 | 37,065 -  | 1 |
| GenelD:28077    | Med10         | 13 | 69,809,882 | 69,816,094 | 6,212 +   | 1 |
| GenelD:218333   | BC018507      | 13 | 70,588,689 | 70,637,634 | 48,945 -  | 1 |
| GenelD:10004286 | Gm10263       | 13 | 73,317,828 | 73,318,145 | 317 +     | 1 |
| GenelD:407785   | Ndufs6        | 13 | 73,319,876 | 73,328,482 | 8,606 -   | 1 |
| GenelD:94066    | Mrpl36        | 13 | 73,331,009 | 73,332,178 | 1,169 +   | 1 |
| GenelD:210992   | Lpcat1        | 13 | 73,467,383 | 73,514,538 | 47,155 +  | 1 |
| GenelD:218335   | Clptm1l       | 13 | 73,604,002 | 73,620,639 | 16,637 +  | 1 |
| GenelD:20499    | Slc12a7       | 13 | 73,763,697 | 73,816,743 | 53,046 +  | 1 |
| GenelD:69716    | Trip13        | 13 | 73,912,462 | 73,937,767 | 25,305 -  | 1 |
| GenelD:105246   | Brd9          | 13 | 73,937,838 | 73,960,895 | 23,057 +  | 1 |
| GenelD:72948    | Tppp          | 13 | 74,009,419 | 74,035,753 | 26,334 +  | 1 |
| GenelD:66945    | Sdha          | 13 | 74,322,255 | 74,350,240 | 27,985 -  | 1 |
| GenelD:67433    | Ccdc127       | 13 | 74,350,317 | 74,365,783 | 15,466 +  | 1 |
| GenelD:432779   | Lrrc14b       | 13 | 74,359,582 | 74,364,000 | 4,418 -   | 1 |
| GenelD:80898    | Erap1         | 13 | 74,639,872 | 74,691,875 | 52,003 +  | 1 |
| GenelD:192657   | Ell2          | 13 | 75,707,484 | 75,772,361 | 64,877 +  | 1 |
| GenelD:73296    | Rhobtb3       | 13 | 75,869,537 | 75,943,824 | 74,287 -  | 1 |
| GenelD:105377   | Ankrd32       | 13 | 77,043,088 | 77,135,468 | 92,380 -  | 1 |
| GenelD:72371    | 2210408I21Rik | 13 | 77,135,536 | 77,613,679 | 478,143 + | 1 |
| GenelD:68675    | Fam172a       | 13 | 77,708,690 | 78,166,240 | 457,550 + | 1 |
| GenelD:105171   | Arrdc3        | 13 | 80,883,422 | 80,896,042 | 12,620 +  | 1 |
| GenelD:67486    | Polr3g        | 13 | 81,673,837 | 81,711,013 | 37,176 -  | 1 |
| GenelD:72852    | Mblac2        | 13 | 81,711,417 | 81,753,275 | 41,858 +  | 1 |
| GenelD:66671    | Ccnh          | 13 | 85,189,477 | 85,213,723 | 24,246 +  | 1 |
| GenelD:218397   | Rasa1         | 13 | 85,214,699 | 85,289,486 | 74,787 -  | 1 |
| GenelD:108138   | Xrcc4         | 13 | 89,848,914 | 90,089,608 | 240,694 - | 1 |
| GenelD:66074    | Tmem167       | 13 | 90,089,667 | 90,114,921 | 25,254 +  | 1 |
| GenelD:66970    | Ssbp2         | 13 | 91,461,097 | 91,706,175 | 245,078 + | 2 |
| GenelD:69085    | Zcchc9        | 13 | 91,796,533 | 91,807,696 | 11,163 -  | 1 |
| GenelD:19418    | Rasgrf2       | 13 | 92,022,789 | 92,131,494 | 108,705 - | 1 |
| GenelD:218440   | Ankrd34b      | 13 | 92,425,969 | 92,441,658 | 15,689 +  | 1 |
| GenelD:218441   | Zfyve16       | 13 | 92,487,749 | 92,530,810 | 43,061 -  | 1 |
| GenelD:218442   | Serinc5       | 13 | 92,611,138 | 92,711,947 | 100,809 + | 1 |
| GenelD:382793   | Mtx3          | 13 | 92,844,787 | 92,858,230 | 13,443 +  | 1 |
| GenelD:26556    | Homer1        | 13 | 93,304,495 | 93,404,962 | 100,467 + | 1 |
| GenelD:57748    | Jmy           | 13 | 93,430,097 | 93,499,808 | 69,711 -  | 1 |
| GenelD:11881    | Arsb          | 13 | 93,771,679 | 93,943,016 | 171,337 + | 1 |
| GenelD:107767   | Scamp1        | 13 | 94,201,433 | 94,285,281 | 83,848 -  | 1 |
| GenelD:328309   | Gm9776        | 13 | 94,356,747 | 94,358,923 | 2,176 -   | 1 |
| GenelD:11774    | Ap3b1         | 13 | 94,358,960 | 94,566,316 | 207,356 + | 1 |
| GenelD:21371    | Tbca          | 13 | 94,788,943 | 94,842,899 | 53,956 +  | 1 |
| GenelD:218460   | Wdr41         | 13 | 94,976,344 | 95,023,316 | 46,972 +  | 1 |
| GenelD:72114    | Zbed3         | 13 | 95,325,237 | 95,337,841 | 12,604 +  | 2 |
| GenelD:10031681 | Mir1940       | 13 | 95,330,580 | 95,330,683 | 103 +     | 2 |

|                 |               |    |             |             |             |   |
|-----------------|---------------|----|-------------|-------------|-------------|---|
| GenelD:10021745 | Snora47       | 13 | 95,330,611  | 95,330,736  | 125 +       | 2 |
| GenelD:66549    | Aggf1         | 13 | 95,350,716  | 95,375,334  | 24,618 -    | 1 |
| GenelD:14062    | F2r           | 13 | 95,601,789  | 95,618,433  | 16,644 -    | 1 |
| GenelD:544963   | Iqgap2        | 13 | 95,627,177  | 95,891,922  | 264,745 -   | 2 |
| GenelD:15357    | Hmgcr         | 13 | 96,648,962  | 96,670,936  | 21,974 -    | 1 |
| GenelD:218476   | Gcnt4         | 13 | 96,924,689  | 96,950,914  | 26,225 +    | 1 |
| GenelD:13803    | Enc1          | 13 | 97,241,105  | 97,253,040  | 11,935 +    | 1 |
| GenelD:105372   | Utp15         | 13 | 98,246,845  | 98,262,992  | 16,147 -    | 1 |
| GenelD:68558    | Ankra2        | 13 | 98,263,242  | 98,273,913  | 10,671 +    | 1 |
| GenelD:218490   | Btf3          | 13 | 98,309,897  | 98,317,006  | 7,109 -     | 1 |
| GenelD:10050422 | Gm9828        | 13 | 98,316,426  | 98,324,415  | 7,989 +     | 1 |
| GenelD:238799   | Tnp01         | 13 | 98,842,081  | 98,926,384  | 84,303 -    | 1 |
| GenelD:68927    | Ptcd2         | 13 | 99,319,649  | 99,344,678  | 25,029 -    | 1 |
| GenelD:218506   | Mrps27        | 13 | 99,344,786  | 99,415,561  | 70,775 +    | 1 |
| GenelD:17755    | Map1b         | 13 | 99,421,464  | 99,516,602  | 95,138 -    | 2 |
| GenelD:544971   | Bdp1          | 13 | 100,017,994 | 100,104,070 | 86,076 -    | 1 |
| GenelD:20365    | Serf1         | 13 | 100,108,019 | 100,114,233 | 6,214 +     | 1 |
| GenelD:20595    | Smn1          | 13 | 100,123,205 | 100,137,698 | 14,493 +    | 1 |
| GenelD:18260    | Ocln          | 13 | 100,497,367 | 100,552,498 | 55,131 -    | 1 |
| GenelD:66128    | Mrps36        | 13 | 100,735,940 | 100,744,659 | 8,719 -     | 1 |
| GenelD:26886    | Cenph         | 13 | 100,759,686 | 100,775,899 | 16,213 -    | 2 |
| GenelD:268697   | Ccnb1         | 13 | 100,778,739 | 100,786,486 | 7,747 -     | 2 |
| GenelD:69048    | Slc30a5       | 13 | 100,802,648 | 100,833,427 | 30,779 -    | 1 |
| GenelD:18708    | Pik3r1        | 13 | 101,680,761 | 101,768,217 | 87,456 -    | 1 |
| GenelD:328329   | Mast4         | 13 | 102,732,488 | 103,334,492 | 602,004 -   | 1 |
| GenelD:75805    | Nln           | 13 | 104,023,439 | 104,109,614 | 86,175 -    | 1 |
| GenelD:218544   | Sgtb          | 13 | 104,109,790 | 104,141,452 | 31,662 +    | 1 |
| GenelD:76582    | Ipo11         | 13 | 106,794,439 | 106,936,915 | 142,476 -   | 1 |
| GenelD:66254    | Dimt1         | 13 | 106,947,129 | 106,960,224 | 13,095 +    | 1 |
| GenelD:16563    | Kif2a         | 13 | 106,960,585 | 107,022,114 | 61,529 -    | 2 |
| GenelD:10004032 | 3830408C21Rik | 13 | 107,022,570 | 107,033,518 | 10,948 +    | 2 |
| GenelD:67263    | Zswim6        | 13 | 107,724,617 | 107,890,064 | 165,447 -   | 2 |
| GenelD:70680    | 3021401N23Rik | 13 | 108,042,121 | 108,044,412 | 2,291 -     | 1 |
| GenelD:75616    | Smim15        | 13 | 108,044,474 | 108,049,146 | 4,672 +     | 1 |
| GenelD:75597    | Ndufaf2       | 13 | 108,052,589 | 108,158,625 | 106,036 -   | 2 |
| GenelD:71991    | Ercc8         | 13 | 108,158,738 | 108,194,981 | 36,243 +    | 1 |
| GenelD:218581   | Depdc1b       | 13 | 108,316,337 | 108,389,557 | 73,220 +    | 1 |
| GenelD:238871   | Pde4d         | 13 | 108,654,177 | 109,955,969 | 1,301,792 + | 1 |
| GenelD:10031668 | Mir1904       | 13 | 109,903,809 | 109,903,888 | 79 +        | 1 |
| GenelD:20620    | Plk2          | 13 | 110,395,044 | 110,400,844 | 5,800 +     | 1 |
| GenelD:73274    | Gbbp1         | 13 | 111,425,680 | 111,490,041 | 64,361 -    | 1 |
| GenelD:218613   | Mier3         | 13 | 111,686,178 | 111,718,594 | 32,416 +    | 2 |
| GenelD:26401    | Map3k1        | 13 | 111,746,433 | 111,808,983 | 62,550 -    | 2 |
| GenelD:10050467 | Gm15327       | 13 | 111,809,136 | 111,811,039 | 1,903 +     | 2 |
| GenelD:16195    | Il6st         | 13 | 112,464,070 | 112,506,860 | 42,790 +    | 1 |
| GenelD:19012    | Ppap2a        | 13 | 112,800,792 | 112,867,680 | 66,888 +    | 1 |
| GenelD:72198    | Skiv2l2       | 13 | 112,867,780 | 112,927,380 | 59,600 -    | 1 |

|                 |               |    |             |             |           |   |
|-----------------|---------------|----|-------------|-------------|-----------|---|
| GenelD:218629   | Dhx29         | 13 | 112,927,793 | 112,969,187 | 41,394 +  | 1 |
| GenelD:170625   | Snx18         | 13 | 113,592,179 | 113,618,564 | 26,385 -  | 1 |
| GenelD:14313    | Fst           | 13 | 114,452,262 | 114,458,730 | 6,468 -   | 1 |
| GenelD:109700   | Itga1         | 13 | 114,958,079 | 115,101,964 | 143,885 - | 1 |
| GenelD:105083   | Pelo          | 13 | 115,088,355 | 115,090,158 | 1,803 -   | 1 |
| GenelD:670198   | Gm10734       | 13 | 115,089,501 | 115,090,987 | 1,486 +   | 1 |
| GenelD:52552    | Parp8         | 13 | 116,854,824 | 117,025,516 | 170,692 - | 1 |
| GenelD:59054    | Mrps30        | 13 | 118,380,110 | 118,387,252 | 7,142 -   | 1 |
| GenelD:218693   | Paip1         | 13 | 119,428,600 | 119,460,320 | 31,720 +  | 1 |
| GenelD:10105576 | LOC101055764  | 13 | 119,606,650 | 119,610,459 | 3,809 +   | 1 |
| GenelD:73480    | 1700074H08Rik | 13 | 119,680,042 | 119,681,582 | 1,540 +   | 1 |
| GenelD:208715   | Hmgcs1        | 13 | 119,690,462 | 119,708,077 | 17,615 +  | 1 |
| GenelD:72465    | Zfp131        | 13 | 119,765,187 | 119,790,805 | 25,618 -  | 1 |
| GenelD:19270    | Ptprg         | 14 | 11,553,553  | 12,242,039  | 688,486 + | 1 |
| GenelD:246103   | Atxn7         | 14 | 14,012,491  | 14,107,302  | 94,811 +  | 1 |
| GenelD:66413    | Psmc6         | 14 | 14,112,185  | 14,120,904  | 8,719 -   | 1 |
| GenelD:218756   | Slc4a7        | 14 | 14,703,025  | 14,799,943  | 96,918 +  | 1 |
| GenelD:71147    | Oxsm          | 14 | 16,238,659  | 16,249,808  | 11,149 -  | 1 |
| GenelD:59007    | Ngly1         | 14 | 16,249,314  | 16,311,926  | 62,612 +  | 1 |
| GenelD:21974    | Top2b         | 14 | 16,365,206  | 16,430,787  | 65,581 +  | 1 |
| GenelD:21834    | Thrb          | 14 | 17,660,960  | 18,038,088  | 377,128 + | 1 |
| GenelD:353187   | Nr1d2         | 14 | 18,204,056  | 18,239,106  | 35,050 -  | 1 |
| GenelD:68045    | 2700060E02Rik | 14 | 19,811,402  | 19,823,823  | 12,421 -  | 1 |
| GenelD:70601    | Ecd           | 14 | 20,319,859  | 20,348,121  | 28,262 -  | 1 |
| GenelD:105428   | Fam149b       | 14 | 20,348,162  | 20,383,491  | 35,329 +  | 3 |
| GenelD:108671   | Dnajc9        | 14 | 20,384,638  | 20,388,910  | 4,272 -   | 2 |
| GenelD:66242    | Mrps16        | 14 | 20,391,231  | 20,393,555  | 2,324 -   | 2 |
| GenelD:76670    | Ttc18         | 14 | 20,394,190  | 20,452,225  | 58,035 -  | 2 |
| GenelD:19056    | Ppp3cb        | 14 | 20,499,314  | 20,546,573  | 47,259 -  | 1 |
| GenelD:75602    | 1810062O18Rik | 14 | 20,546,293  | 20,570,680  | 24,387 +  | 1 |
| GenelD:78787    | Usp54         | 14 | 20,548,912  | 20,618,354  | 69,442 -  | 1 |
| GenelD:10050427 | 2810402E24Rik | 14 | 20,641,009  | 20,641,853  | 844 +     | 1 |
| GenelD:59011    | Myoz1         | 14 | 20,649,102  | 20,656,540  | 7,438 -   | 2 |
| GenelD:68760    | Synpo2l       | 14 | 20,659,418  | 20,668,306  | 8,888 -   | 2 |
| GenelD:218811   | Sec24c        | 14 | 20,674,321  | 20,694,850  | 20,529 +  | 3 |
| GenelD:73068    | Fut11         | 14 | 20,694,968  | 20,700,197  | 5,229 +   | 3 |
| GenelD:76133    | 6230400D17Rik | 14 | 20,702,012  | 20,703,099  | 1,087 -   | 3 |
| GenelD:66121    | Chchd1        | 14 | 20,703,027  | 20,704,425  | 1,398 +   | 3 |
| GenelD:268721   | Zswim8        | 14 | 20,707,552  | 20,723,619  | 16,067 +  | 3 |
| GenelD:17423    | Ndst2         | 14 | 20,723,730  | 20,734,562  | 10,832 -  | 1 |
| GenelD:12325    | Camk2g        | 14 | 20,734,875  | 20,794,088  | 59,213 -  | 2 |
| GenelD:22330    | Vcl           | 14 | 20,929,433  | 21,033,673  | 104,240 + | 1 |
| GenelD:11534    | Adk           | 14 | 21,052,574  | 21,448,569  | 395,995 + | 1 |
| GenelD:54169    | Kat6b         | 14 | 21,499,770  | 21,672,478  | 172,708 + | 1 |
| GenelD:27389    | Dusp13        | 14 | 21,733,395  | 21,748,622  | 15,227 -  | 1 |
| GenelD:67630    | Samd8         | 14 | 21,750,531  | 21,798,725  | 48,194 +  | 1 |
| GenelD:22334    | Vdac2         | 14 | 21,831,561  | 21,845,879  | 14,318 +  | 1 |



|                 |               |    |            |            |           |   |
|-----------------|---------------|----|------------|------------|-----------|---|
| GenelD:69156    | Comtd1        | 14 | 21,845,861 | 21,848,910 | 3,049 -   | 1 |
| GenelD:319486   | A430057M04Rik | 14 | 21,847,578 | 21,856,926 | 9,348 +   | 1 |
| GenelD:218820   | Zfp503        | 14 | 21,983,962 | 21,989,601 | 5,639 -   | 2 |
| GenelD:16531    | Kcnma1        | 14 | 23,298,694 | 24,004,205 | 705,511 - | 1 |
| GenelD:71228    | Dlg5          | 14 | 24,133,953 | 24,245,920 | 111,967 - | 1 |
| GenelD:432830   | Gm17747       | 14 | 25,441,641 | 25,453,227 | 11,586 +  | 1 |
| GenelD:328365   | Zmiz1         | 14 | 25,459,185 | 25,666,747 | 207,562 + | 2 |
| GenelD:10018891 | Israa         | 14 | 25,603,547 | 25,603,924 | 377 +     | 1 |
| GenelD:105675   | Ppif          | 14 | 25,694,170 | 25,700,468 | 6,298 +   | 1 |
| GenelD:68173    | Ppifos        | 14 | 25,696,356 | 25,701,282 | 4,926 -   | 1 |
| GenelD:71918    | Zcchc24       | 14 | 25,711,640 | 25,768,856 | 57,216 -  | 1 |
| GenelD:11744    | Anxa11        | 14 | 25,842,155 | 25,886,804 | 44,649 +  | 1 |
| GenelD:83997    | Slmap         | 14 | 26,413,175 | 26,533,740 | 120,565 - | 1 |
| GenelD:211922   | Dennd6a       | 14 | 26,579,550 | 26,632,100 | 52,550 +  | 1 |
| GenelD:211948   | Pde12         | 14 | 26,664,117 | 26,669,846 | 5,729 -   | 1 |
| GenelD:171463   | Il17rd        | 14 | 27,039,001 | 27,107,286 | 68,285 +  | 2 |
| GenelD:218850   | D14Abb1e      | 14 | 27,428,847 | 27,483,555 | 54,708 +  | 1 |
| GenelD:22418    | Wnt5a         | 14 | 28,505,473 | 28,525,515 | 20,042 +  | 2 |
| GenelD:80795    | Selk          | 14 | 29,968,380 | 29,975,074 | 6,694 +   | 1 |
| GenelD:56249    | Actr8         | 14 | 29,978,337 | 29,993,221 | 14,884 +  | 1 |
| GenelD:18753    | Prkcd         | 14 | 30,595,354 | 30,626,208 | 30,854 -  | 1 |
| GenelD:328370   | Rft1          | 14 | 30,654,375 | 30,691,317 | 36,942 +  | 1 |
| GenelD:54650    | Sfmbt1        | 14 | 30,714,849 | 30,822,721 | 107,872 + | 3 |
| GenelD:69179    | Tmem110       | 14 | 30,825,594 | 30,877,210 | 51,616 +  | 1 |
| GenelD:69019    | Spcs1         | 14 | 30,999,826 | 31,001,666 | 1,840 -   | 1 |
| GenelD:76485    | Glt8d1        | 14 | 31,001,393 | 31,012,441 | 11,048 +  | 2 |
| GenelD:30877    | Gnl3          | 14 | 31,012,433 | 31,019,089 | 6,656 -   | 1 |
| GenelD:10021743 | Snord69       | 14 | 31,014,293 | 31,014,351 | 58 -      | 1 |
| GenelD:10021742 | Snord19       | 14 | 31,016,219 | 31,016,272 | 53 -      | 1 |
| GenelD:66923    | Pbrm1         | 14 | 31,019,138 | 31,121,592 | 102,454 + | 2 |
| GenelD:66487    | Smim4         | 14 | 31,124,505 | 31,128,930 | 4,425 -   | 1 |
| GenelD:70021    | Nt5dc2        | 14 | 31,134,853 | 31,139,124 | 4,271 +   | 1 |
| GenelD:192187   | Stab1         | 14 | 31,139,017 | 31,168,641 | 29,624 -  | 1 |
| GenelD:71838    | Phf7          | 14 | 31,237,696 | 31,251,218 | 13,522 -  | 1 |
| GenelD:104416   | Bap1          | 14 | 31,251,489 | 31,259,929 | 8,440 +   | 1 |
| GenelD:110084   | Dnahc1        | 14 | 31,260,375 | 31,323,896 | 63,521 -  | 1 |
| GenelD:12339    | Capn7         | 14 | 31,336,724 | 31,371,984 | 35,260 +  | 1 |
| GenelD:24056    | Sh3bp5        | 14 | 31,373,955 | 31,436,033 | 62,078 -  | 1 |
| GenelD:67011    | Mettl6        | 14 | 31,478,798 | 31,494,977 | 16,179 -  | 1 |
| GenelD:74427    | Eaf1          | 14 | 31,495,079 | 31,509,858 | 14,779 +  | 1 |
| GenelD:105522   | Ankrd28       | 14 | 31,700,015 | 31,830,415 | 130,400 - | 1 |
| GenelD:17695    | Msemb         | 14 | 32,142,023 | 32,158,327 | 16,304 +  | 1 |
| GenelD:27057    | Ncoa4         | 14 | 32,159,892 | 32,179,363 | 19,471 +  | 1 |
| GenelD:53600    | Timm23        | 14 | 32,180,166 | 32,201,891 | 21,725 -  | 1 |
| GenelD:26430    | Parg          | 14 | 32,201,971 | 32,297,550 | 95,579 +  | 1 |
| GenelD:320736   | Vstm4         | 14 | 32,856,756 | 32,939,489 | 82,733 +  | 1 |
| GenelD:239027   | Arhgap22      | 14 | 33,216,823 | 33,369,936 | 153,113 + | 1 |

|                 |               |    |            |            |             |   |
|-----------------|---------------|----|------------|------------|-------------|---|
| GenelD:26419    | Mapk8         | 14 | 33,377,898 | 33,447,158 | 69,260 -    | 1 |
| GenelD:75698    | Fam35a        | 14 | 34,237,033 | 34,310,503 | 73,470 -    | 1 |
| GenelD:14661    | Glud1         | 14 | 34,310,727 | 34,345,033 | 34,306 +    | 1 |
| GenelD:69134    | Fam25c        | 14 | 34,351,882 | 34,355,393 | 3,511 -     | 1 |
| GenelD:20618    | Sncg          | 14 | 34,370,274 | 34,374,669 | 4,395 -     | 1 |
| GenelD:12166    | Bmpr1a        | 14 | 34,411,068 | 34,502,546 | 91,478 -    | 1 |
| GenelD:78243    | 9230112D13Rik | 14 | 34,511,621 | 34,522,801 | 11,180 -    | 1 |
| GenelD:24131    | Ldb3          | 14 | 34,526,699 | 34,588,681 | 61,982 -    | 1 |
| GenelD:218914   | Wapal         | 14 | 34,673,928 | 34,746,217 | 72,289 +    | 1 |
| GenelD:18183    | Nrg3          | 14 | 38,368,951 | 39,473,088 | 1,104,137 - | 1 |
| GenelD:70561    | Txndc16       | 14 | 45,134,448 | 45,219,394 | 84,946 -    | 1 |
| GenelD:70713    | Gpr137c       | 14 | 45,219,717 | 45,280,976 | 61,259 +    | 1 |
| GenelD:50527    | Ero1l         | 14 | 45,283,087 | 45,318,572 | 35,485 -    | 1 |
| GenelD:67089    | Psmc6         | 14 | 45,329,824 | 45,349,071 | 19,247 +    | 1 |
| GenelD:114874   | Ddhd1         | 14 | 45,593,174 | 45,658,143 | 64,969 -    | 1 |
| GenelD:10062860 | Mir5131       | 14 | 45,657,961 | 45,658,053 | 92 -        | 1 |
| GenelD:320367   | A530076I17Rik | 14 | 45,665,806 | 45,668,498 | 2,692 -     | 1 |
| GenelD:12793    | Cnih          | 14 | 46,775,567 | 46,788,357 | 12,790 -    | 1 |
| GenelD:63985    | Gmfb          | 14 | 46,808,149 | 46,822,242 | 14,093 -    | 2 |
| GenelD:328388   | Gm10101       | 14 | 46,829,109 | 46,832,027 | 2,918 -     | 2 |
| GenelD:68755    | Cgrrf1        | 14 | 46,832,244 | 46,854,190 | 21,946 +    | 2 |
| GenelD:74480    | Samd4         | 14 | 46,882,965 | 47,105,817 | 222,852 +   | 2 |
| GenelD:14528    | Gch1          | 14 | 47,153,895 | 47,189,402 | 35,507 -    | 1 |
| GenelD:10050466 | Atg14         | 14 | 47,540,893 | 47,568,434 | 27,541 -    | 1 |
| GenelD:625730   | Gm6616        | 14 | 47,569,409 | 47,569,836 | 427 +       | 1 |
| GenelD:93834    | Peli2         | 14 | 48,120,869 | 48,260,883 | 140,014 +   | 1 |
| GenelD:218989   | Tmem260       | 14 | 48,446,352 | 48,515,159 | 68,807 +    | 1 |
| GenelD:105504   | Exoc5         | 14 | 49,012,144 | 49,066,667 | 54,523 -    | 1 |
| GenelD:74385    | Ap5m1         | 14 | 49,066,495 | 49,087,723 | 21,228 +    | 1 |
| GenelD:70646    | Naa30         | 14 | 49,172,227 | 49,191,031 | 18,804 +    | 1 |
| GenelD:66246    | Osgep         | 14 | 50,915,374 | 50,924,893 | 9,519 -     | 1 |
| GenelD:11792    | Apex1         | 14 | 50,924,949 | 50,927,188 | 2,239 +     | 1 |
| GenelD:219024   | Tmem55b       | 14 | 50,926,070 | 50,930,849 | 4,779 -     | 1 |
| GenelD:268739   | Arhgef40      | 14 | 51,984,833 | 52,006,247 | 21,414 +    | 2 |
| GenelD:10050276 | Gm16617       | 14 | 51,986,389 | 51,988,829 | 2,440 -     | 2 |
| GenelD:114741   | Supt16        | 14 | 52,160,419 | 52,197,239 | 36,820 -    | 1 |
| GenelD:67772    | Chd8          | 14 | 52,198,151 | 52,237,572 | 39,421 -    | 1 |
| GenelD:268741   | Tox4          | 14 | 52,279,146 | 52,295,509 | 16,363 +    | 1 |
| GenelD:56335    | Mettl3        | 14 | 52,294,841 | 52,305,124 | 10,283 -    | 1 |
| GenelD:50524    | Sall2         | 14 | 52,311,177 | 52,328,670 | 17,493 -    | 1 |
| GenelD:68836    | Mrpl52        | 14 | 54,426,909 | 54,429,750 | 2,841 +     | 1 |
| GenelD:17387    | Mmp14         | 14 | 54,431,604 | 54,441,258 | 9,654 +     | 1 |
| GenelD:65107    | Lrp10         | 14 | 54,464,147 | 54,470,292 | 6,145 +     | 1 |
| GenelD:219072   | Haus4         | 14 | 54,541,785 | 54,554,361 | 12,576 -    | 1 |
| GenelD:16475    | Ajuba         | 14 | 54,567,469 | 54,577,661 | 10,192 -    | 2 |
| GenelD:74359    | 4931414P19Rik | 14 | 54,583,663 | 54,605,908 | 22,245 -    | 2 |
| GenelD:56215    | Acin1         | 14 | 54,642,161 | 54,686,931 | 44,770 -    | 1 |

|                 |               |    |            |            |          |   |
|-----------------|---------------|----|------------|------------|----------|---|
| GenelD:58248    | 1700123O20Rik | 14 | 54,686,171 | 54,690,742 | 4,571 +  | 1 |
| GenelD:10105608 | LOC101056084  | 14 | 54,693,691 | 54,698,827 | 5,136 -  | 1 |
| GenelD:105651   | Ppp1r3e       | 14 | 54,875,597 | 54,877,538 | 1,941 -  | 1 |
| GenelD:12050    | Bcl2l2        | 14 | 54,883,425 | 54,888,234 | 4,809 +  | 2 |
| GenelD:54196    | Pabpn1        | 14 | 54,894,143 | 54,898,927 | 4,784 +  | 1 |
| GenelD:59049    | Slc22a17      | 14 | 54,906,727 | 54,913,132 | 6,405 -  | 1 |
| GenelD:13644    | Efs           | 14 | 54,916,543 | 54,926,788 | 10,245 - | 2 |
| GenelD:140806   | Il25          | 14 | 54,932,695 | 54,935,837 | 3,142 +  | 1 |
| GenelD:67272    | Cmtm5         | 14 | 54,936,470 | 54,939,277 | 2,807 +  | 1 |
| GenelD:239102   | Zfhx2         | 14 | 55,061,658 | 55,092,048 | 30,390 - | 1 |
| GenelD:432855   | Zfhx2as       | 14 | 55,073,091 | 55,075,874 | 2,783 +  | 1 |
| GenelD:105663   | Thtpa         | 14 | 55,094,784 | 55,098,995 | 4,211 +  | 1 |
| GenelD:11766    | Ap1g2         | 14 | 55,098,850 | 55,106,593 | 7,743 -  | 2 |
| GenelD:319984   | Jph4          | 14 | 55,106,826 | 55,116,935 | 10,109 - | 2 |
| GenelD:28200    | Dhrs4         | 14 | 55,478,758 | 55,490,340 | 11,582 + | 1 |
| GenelD:268747   | Lrrc16b       | 14 | 55,491,093 | 55,508,264 | 17,171 + | 1 |
| GenelD:19186    | Psme1         | 14 | 55,578,494 | 55,581,527 | 3,033 +  | 1 |
| GenelD:85308    | Emc9          | 14 | 55,581,524 | 55,585,254 | 3,730 -  | 1 |
| GenelD:19188    | Psme2         | 14 | 55,587,440 | 55,591,101 | 3,661 -  | 1 |
| GenelD:268749   | Rnf31         | 14 | 55,591,790 | 55,603,671 | 11,881 + | 1 |
| GenelD:56739    | Rec8          | 14 | 55,618,166 | 55,625,395 | 7,229 +  | 1 |
| GenelD:75751    | Ipo4          | 14 | 55,625,629 | 55,635,678 | 10,049 - | 2 |
| GenelD:74140    | Tm9sf1        | 14 | 55,635,966 | 55,643,806 | 7,840 -  | 2 |
| GenelD:71099    | Tssk4         | 14 | 55,650,184 | 55,652,539 | 2,355 +  | 1 |
| GenelD:18002    | Nedd8         | 14 | 55,662,267 | 55,671,906 | 9,639 -  | 1 |
| GenelD:105446   | Gmpr2         | 14 | 55,672,235 | 55,678,751 | 6,516 +  | 1 |
| GenelD:28113    | Tinf2         | 14 | 55,679,080 | 55,681,817 | 2,737 -  | 1 |
| GenelD:21816    | Tgm1          | 14 | 55,700,009 | 55,713,492 | 13,483 - | 1 |
| GenelD:56187    | RabggtA       | 14 | 55,715,877 | 55,722,176 | 6,299 -  | 1 |
| GenelD:52585    | Dhrs1         | 14 | 55,739,020 | 55,745,684 | 6,664 -  | 1 |
| GenelD:67842    | Nop9          | 14 | 55,745,693 | 55,755,634 | 9,941 +  | 1 |
| GenelD:12684    | Cideb         | 14 | 55,754,052 | 55,758,424 | 4,372 -  | 1 |
| GenelD:277154   | Nynrin        | 14 | 55,854,115 | 55,874,736 | 20,621 + | 1 |
| GenelD:219103   | Cenpj         | 14 | 56,526,761 | 56,571,846 | 45,085 - | 1 |
| GenelD:328417   | Parp4         | 14 | 56,575,619 | 56,659,798 | 84,179 + | 1 |
| GenelD:66645    | Pspc1         | 14 | 56,722,449 | 56,778,316 | 55,867 - | 1 |
| GenelD:76007    | Zmym2         | 14 | 56,887,795 | 56,962,579 | 74,784 + | 2 |
| GenelD:14619    | Gjb2          | 14 | 57,098,602 | 57,104,702 | 6,100 -  | 1 |
| GenelD:21821    | Ift88         | 14 | 57,424,071 | 57,517,936 | 93,865 + | 1 |
| GenelD:50523    | Lats2         | 14 | 57,689,662 | 57,746,123 | 56,461 - | 1 |
| GenelD:219114   | Ska3          | 14 | 57,806,561 | 57,826,163 | 19,602 - | 1 |
| GenelD:67840    | Mrp63         | 14 | 57,826,239 | 57,828,745 | 2,506 +  | 1 |
| GenelD:75965    | Zdhhc20       | 14 | 57,832,702 | 57,890,262 | 57,560 - | 2 |
| GenelD:71330    | Rcbtb1        | 14 | 59,201,228 | 59,237,265 | 36,037 + | 1 |
| GenelD:71891    | Cdadc1        | 14 | 59,559,388 | 59,597,959 | 38,571 - | 1 |
| GenelD:219134   | Shisa2        | 14 | 59,625,281 | 59,631,660 | 6,379 +  | 1 |
| GenelD:71844    | Nupl1         | 14 | 60,219,468 | 60,251,378 | 31,910 - | 1 |

|               |               |    |            |            |           |   |
|---------------|---------------|----|------------|------------|-----------|---|
| GenelD:219140 | Spata13       | 14 | 60,634,729 | 60,764,556 | 129,827 + | 1 |
| GenelD:50720  | Sacs          | 14 | 61,138,457 | 61,240,693 | 102,236 + | 1 |
| GenelD:16648  | Kpna3         | 14 | 61,365,186 | 61,439,947 | 74,761 -  | 1 |
| GenelD:66597  | Trim13        | 14 | 61,598,226 | 61,605,946 | 7,720 +   | 1 |
| GenelD:668253 | Dleu2         | 14 | 61,602,836 | 61,682,373 | 79,537 -  | 4 |
| GenelD:328424 | Kcnrg         | 14 | 61,607,457 | 61,612,833 | 5,376 +   | 1 |
| GenelD:239133 | Dleu7         | 14 | 62,276,229 | 62,292,979 | 16,750 -  | 1 |
| GenelD:67153  | Rnaseh2b      | 14 | 62,332,105 | 62,372,992 | 40,887 +  | 1 |
| GenelD:629059 | Fam124a       | 14 | 62,555,737 | 62,608,485 | 52,748 +  | 1 |
| GenelD:18130  | Ints6         | 14 | 62,676,325 | 62,761,112 | 84,787 -  | 1 |
| GenelD:71000  | 4931440J10Rik | 14 | 62,760,501 | 62,830,126 | 69,625 +  | 2 |
| GenelD:268752 | Wdfy2         | 14 | 62,837,690 | 62,956,886 | 119,196 + | 1 |
| GenelD:14463  | Gata4         | 14 | 63,198,915 | 63,245,260 | 46,345 -  | 2 |
| GenelD:210376 | Mtmr9         | 14 | 63,523,610 | 63,543,953 | 20,343 -  | 1 |
| GenelD:219149 | Xkr6          | 14 | 63,606,530 | 63,820,411 | 213,881 + | 2 |
| GenelD:72400  | Pinx1         | 14 | 63,860,312 | 63,919,859 | 59,547 +  | 1 |
| GenelD:54616  | Extl3         | 14 | 65,052,059 | 65,098,106 | 46,047 -  | 1 |
| GenelD:380912 | Zfp395        | 14 | 65,358,676 | 65,398,930 | 40,254 +  | 1 |
| GenelD:71988  | Esco2         | 14 | 65,819,027 | 65,833,969 | 14,942 -  | 2 |
| GenelD:67179  | Ccdc25        | 14 | 65,837,302 | 65,866,604 | 29,302 +  | 2 |
| GenelD:69303  | 1700001G11Rik | 14 | 66,295,327 | 66,297,129 | 1,802 -   | 1 |
| GenelD:66854  | Trim35        | 14 | 66,297,025 | 66,311,424 | 14,399 +  | 1 |
| GenelD:12177  | Bnip3l        | 14 | 66,985,240 | 67,008,877 | 23,637 -  | 1 |
| GenelD:71978  | Ppp2r2a       | 14 | 67,014,056 | 67,072,471 | 58,415 -  | 2 |
| GenelD:13592  | Ebf2          | 14 | 67,233,292 | 67,429,767 | 196,475 + | 1 |
| GenelD:68813  | Dock5         | 14 | 67,751,928 | 67,933,572 | 181,644 - | 1 |
| GenelD:73554  | 1700092C10Rik | 14 | 69,164,799 | 69,171,843 | 7,044 -   | 1 |
| GenelD:18092  | Nkx2-6        | 14 | 69,171,802 | 69,175,540 | 3,738 +   | 1 |
| GenelD:71843  | R3hcc1        | 14 | 69,697,304 | 69,707,580 | 10,276 -  | 1 |
| GenelD:105513 | Chmp7         | 14 | 69,716,979 | 69,732,570 | 15,591 -  | 2 |
| GenelD:13655  | Egr3          | 14 | 70,077,445 | 70,080,157 | 2,712 +   | 1 |
| GenelD:219158 | 2610301G19Rik | 14 | 70,138,168 | 70,153,791 | 15,623 -  | 2 |
| GenelD:268759 | 9930012K11Rik | 14 | 70,154,405 | 70,159,502 | 5,097 -   | 2 |
| GenelD:213019 | Pdlim2        | 14 | 70,164,218 | 70,177,672 | 13,454 -  | 1 |
| GenelD:19057  | Ppp3cc        | 14 | 70,217,898 | 70,289,449 | 71,551 -  | 1 |
| GenelD:67065  | Polr3d        | 14 | 70,438,748 | 70,443,471 | 4,723 -   | 1 |
| GenelD:723838 | Mir320        | 14 | 70,443,510 | 70,443,591 | 81 +      | 1 |
| GenelD:213469 | Lgi3          | 14 | 70,530,821 | 70,538,324 | 7,503 +   | 1 |
| GenelD:72549  | Reep4         | 14 | 70,545,251 | 70,548,935 | 3,684 +   | 1 |
| GenelD:15460  | Hr            | 14 | 70,554,056 | 70,573,543 | 19,487 +  | 1 |
| GenelD:239170 | Fam160b2      | 14 | 70,583,295 | 70,599,835 | 16,540 -  | 1 |
| GenelD:13829  | Epb4.9        | 14 | 70,602,184 | 70,636,048 | 33,864 -  | 1 |
| GenelD:65246  | Xpo7          | 14 | 70,654,246 | 70,766,628 | 112,382 - | 1 |
| GenelD:13449  | Dok2          | 14 | 70,774,381 | 70,778,494 | 4,113 +   | 1 |
| GenelD:319448 | Fndc3a        | 14 | 72,537,953 | 72,710,003 | 172,050 - | 1 |
| GenelD:105670 | Rcbtb2        | 14 | 73,142,510 | 73,184,055 | 41,545 +  | 1 |
| GenelD:19645  | Rb1           | 14 | 73,195,502 | 73,325,791 | 130,289 - | 1 |

|                 |               |    |             |             |             |   |
|-----------------|---------------|----|-------------|-------------|-------------|---|
| GenelD:16432    | Itm2b         | 14 | 73,362,231  | 73,385,271  | 23,040 -    | 1 |
| GenelD:10050456 | Gm20290       | 14 | 73,372,861  | 73,375,780  | 2,919 -     | 1 |
| GenelD:13885    | Esd           | 14 | 74,732,345  | 74,750,443  | 18,098 +    | 1 |
| GenelD:380916   | Lrch1         | 14 | 74,754,673  | 74,947,877  | 193,204 -   | 1 |
| GenelD:56373    | Cpb2          | 14 | 75,242,287  | 75,283,555  | 41,268 +    | 1 |
| GenelD:67302    | Zc3h13        | 14 | 75,284,373  | 75,344,426  | 60,053 +    | 1 |
| GenelD:338337   | Cog3          | 14 | 75,702,351  | 75,754,493  | 52,142 -    | 1 |
| GenelD:67554    | Slc25a30      | 14 | 75,761,999  | 75,787,037  | 25,038 -    | 1 |
| GenelD:10004318 | Gm4285        | 14 | 75,842,918  | 75,844,964  | 2,046 -     | 1 |
| GenelD:22070    | Tpt1          | 14 | 75,845,256  | 75,848,303  | 3,047 +     | 1 |
| GenelD:10030375 | Snora31       | 14 | 75,847,923  | 75,848,034  | 111 +       | 1 |
| GenelD:68705    | Gtf2f2        | 14 | 75,896,937  | 76,010,865  | 113,928 -   | 1 |
| GenelD:67467    | 1200011118Rik | 14 | 76,086,232  | 76,110,815  | 24,583 -    | 1 |
| GenelD:27275    | Nufip1        | 14 | 76,110,891  | 76,137,379  | 26,488 +    | 1 |
| GenelD:21807    | Tsc22d1       | 14 | 76,415,821  | 76,507,766  | 91,945 +    | 4 |
| GenelD:75789    | 4930444M15Rik | 14 | 76,514,558  | 76,520,855  | 6,297 -     | 3 |
| GenelD:72661    | Serp2         | 14 | 76,532,812  | 76,556,889  | 24,077 -    | 1 |
| GenelD:210808   | Lacc1         | 14 | 77,024,201  | 77,036,617  | 12,416 -    | 1 |
| GenelD:108811   | Ccdc122       | 14 | 77,036,772  | 77,112,204  | 75,432 +    | 1 |
| GenelD:239188   | Enox1         | 14 | 77,156,763  | 77,721,763  | 565,000 +   | 1 |
| GenelD:380921   | Dgkh          | 14 | 78,569,609  | 78,725,089  | 155,480 -   | 2 |
| GenelD:66214    | Rgcc          | 14 | 79,288,750  | 79,301,635  | 12,885 -    | 1 |
| GenelD:66897    | Naa16         | 14 | 79,334,507  | 79,390,668  | 56,161 -    | 1 |
| GenelD:211253   | Mtrf1         | 14 | 79,397,772  | 79,423,650  | 25,878 +    | 1 |
| GenelD:432879   | Zbtbd6        | 14 | 79,451,835  | 79,454,816  | 2,981 +     | 1 |
| GenelD:22380    | Wbp4          | 14 | 79,459,937  | 79,481,268  | 21,331 -    | 2 |
| GenelD:13709    | Elf1          | 14 | 79,481,194  | 79,582,476  | 101,282 +   | 1 |
| GenelD:18530    | Pcdh8         | 14 | 79,766,772  | 79,771,312  | 4,540 -     | 1 |
| GenelD:219249   | Tdrd3         | 14 | 87,416,583  | 87,545,508  | 128,925 +   | 1 |
| GenelD:76789    | Mzt1          | 14 | 99,034,544  | 99,046,136  | 11,592 -    | 1 |
| GenelD:77744    | Bora          | 14 | 99,046,377  | 99,074,107  | 27,730 +    | 1 |
| GenelD:72662    | Dis3          | 14 | 99,076,634  | 99,099,770  | 23,136 -    | 1 |
| GenelD:52023    | Pibf1         | 14 | 99,099,433  | 99,254,493  | 155,060 +   | 1 |
| GenelD:12224    | Klf5          | 14 | 99,298,691  | 99,313,412  | 14,721 +    | 1 |
| GenelD:210789   | Tbc1d4        | 14 | 101,442,360 | 101,609,191 | 166,831 -   | 1 |
| GenelD:50933    | Uchl3         | 14 | 101,653,967 | 101,696,125 | 42,158 +    | 1 |
| GenelD:239217   | Kctd12        | 14 | 102,976,581 | 102,982,637 | 6,056 -     | 1 |
| GenelD:10062859 | Mir5130       | 14 | 102,982,549 | 102,982,632 | 83 -        | 1 |
| GenelD:71264    | 4933432I03Rik | 14 | 102,987,412 | 103,033,803 | 46,391 -    | 1 |
| GenelD:211286   | Cln5          | 14 | 103,070,216 | 103,077,630 | 7,414 +     | 1 |
| GenelD:50789    | Fbxl3         | 14 | 103,080,239 | 103,099,509 | 19,270 -    | 1 |
| GenelD:105689   | Mycbp2        | 14 | 103,113,411 | 103,346,800 | 233,389 -   | 1 |
| GenelD:74213    | Rbm26         | 14 | 105,114,519 | 105,177,327 | 62,808 -    | 1 |
| GenelD:24064    | Spry2         | 14 | 105,891,947 | 105,896,819 | 4,872 -     | 1 |
| GenelD:212085   | Trim52        | 14 | 106,106,198 | 106,109,280 | 3,082 +     | 1 |
| GenelD:23888    | Gpc6          | 14 | 116,925,315 | 117,979,529 | 1,054,214 + | 1 |
| GenelD:10050370 | Gm19845       | 14 | 116,934,884 | 116,937,613 | 2,729 +     | 1 |

|                 |               |    |             |             |           |   |
|-----------------|---------------|----|-------------|-------------|-----------|---|
| GenelD:76355    | Tgds          | 14 | 118,111,911 | 118,132,765 | 20,854 -  | 1 |
| GenelD:58245    | Gpr180        | 14 | 118,137,127 | 118,164,232 | 27,105 +  | 1 |
| GenelD:239273   | Abcc4         | 14 | 118,482,692 | 118,706,219 | 223,527 - | 1 |
| GenelD:10003725 | Dnajc3        | 14 | 118,937,932 | 118,981,702 | 43,770 +  | 1 |
| GenelD:66435    | Uggt2         | 14 | 118,984,985 | 119,099,434 | 114,449 - | 1 |
| GenelD:50787    | Hs6st3        | 14 | 119,138,265 | 119,869,815 | 731,550 + | 1 |
| GenelD:76108    | Rap2a         | 14 | 120,478,461 | 120,507,194 | 28,733 +  | 1 |
| GenelD:223254   | Farp1         | 14 | 121,035,574 | 121,283,726 | 248,152 + | 2 |
| GenelD:223255   | Stk24         | 14 | 121,286,341 | 121,379,230 | 92,889 -  | 2 |
| GenelD:68889    | Ubac2         | 14 | 121,878,606 | 122,021,035 | 142,429 + | 1 |
| GenelD:319727   | A330035P11Rik | 14 | 122,097,939 | 122,106,974 | 9,035 -   | 1 |
| GenelD:68059    | Tm9sf2        | 14 | 122,107,082 | 122,159,603 | 52,521 +  | 1 |
| GenelD:65100    | Zic5          | 14 | 122,459,160 | 122,465,658 | 6,498 -   | 1 |
| GenelD:69248    | 2610035F20Rik | 14 | 122,470,377 | 122,475,199 | 4,822 -   | 1 |
| GenelD:22772    | Zic2          | 14 | 122,475,384 | 122,480,328 | 4,944 +   | 1 |
| GenelD:70551    | Tmtc4         | 14 | 122,918,975 | 122,983,261 | 64,286 -  | 1 |
| GenelD:338370   | Nalcn         | 14 | 123,276,641 | 123,627,144 | 350,503 - | 1 |
| GenelD:14169    | Fgf14         | 14 | 123,978,291 | 124,677,127 | 698,836 - | 1 |
| GenelD:106052   | Fbxo4         | 15 | 3,963,564   | 3,979,573   | 16,009 -  | 1 |
| GenelD:106064   | AW549877      | 15 | 3,982,035   | 3,995,752   | 13,717 -  | 2 |
| GenelD:328489   | A630020A06    | 15 | 3,996,039   | 4,015,858   | 19,819 +  | 1 |
| GenelD:239319   | Card6         | 15 | 5,097,439   | 5,108,533   | 11,094 -  | 1 |
| GenelD:67281    | Rpl37         | 15 | 5,116,613   | 5,119,140   | 2,527 +   | 1 |
| GenelD:10030252 | Snord72       | 15 | 5,118,421   | 5,118,480   | 59 +      | 1 |
| GenelD:105787   | Prkaa1        | 15 | 5,143,861   | 5,181,899   | 38,038 +  | 1 |
| GenelD:268780   | Egflam        | 15 | 7,206,120   | 7,398,304   | 192,184 - | 1 |
| GenelD:14573    | Gdnf          | 15 | 7,811,011   | 7,837,575   | 26,564 +  | 1 |
| GenelD:71175    | Nipbl         | 15 | 8,291,225   | 8,444,463   | 153,238 - | 2 |
| GenelD:27401    | Skp2          | 15 | 9,111,985   | 9,140,451   | 28,466 -  | 1 |
| GenelD:320506   | Lmbrd2        | 15 | 9,140,570   | 9,197,450   | 56,880 +  | 1 |
| GenelD:75646    | Rai14         | 15 | 10,568,978  | 10,714,631  | 145,653 - | 1 |
| GenelD:75259    | 4930556M19Rik | 15 | 10,714,836  | 10,790,123  | 75,287 +  | 1 |
| GenelD:22293    | Slc45a2       | 15 | 11,000,721  | 11,029,233  | 28,512 +  | 1 |
| GenelD:239336   | Rxfp3         | 15 | 11,033,717  | 11,037,968  | 4,251 -   | 1 |
| GenelD:18162    | Npr3          | 15 | 11,839,896  | 11,905,674  | 65,778 -  | 1 |
| GenelD:381002   | Gm5144        | 15 | 11,906,519  | 11,907,395  | 876 +     | 1 |
| GenelD:20024    | Sub1          | 15 | 11,981,339  | 11,996,007  | 14,668 -  | 1 |
| GenelD:22763    | Zfr           | 15 | 12,117,851  | 12,185,449  | 67,598 +  | 1 |
| GenelD:66629    | Golph3        | 15 | 12,321,496  | 12,351,267  | 29,771 +  | 1 |
| GenelD:12563    | Cdh6          | 15 | 13,034,200  | 13,173,639  | 139,439 - | 1 |
| GenelD:70350    | Basp1         | 15 | 25,363,277  | 25,413,764  | 50,487 -  | 1 |
| GenelD:432939   | Gm5468        | 15 | 25,414,192  | 25,452,418  | 38,226 +  | 1 |
| GenelD:17909    | Myo10         | 15 | 25,622,550  | 25,813,671  | 191,121 + | 2 |
| GenelD:52521    | Zfp622        | 15 | 25,984,366  | 25,998,482  | 14,116 +  | 1 |
| GenelD:448987   | Fbxl7         | 15 | 26,540,459  | 26,895,564  | 355,105 - | 2 |
| GenelD:223435   | Trio          | 15 | 27,730,649  | 28,025,848  | 295,199 - | 1 |
| GenelD:67434    | Ankrd33b      | 15 | 31,291,479  | 31,367,759  | 76,280 -  | 1 |

|                 |               |    |            |            |           |   |
|-----------------|---------------|----|------------|------------|-----------|---|
| GenelD:223455   | March6        | 15 | 31,455,899 | 31,531,037 | 75,138 -  | 1 |
| GenelD:12465    | Cct5          | 15 | 31,590,884 | 31,601,804 | 10,920 -  | 1 |
| GenelD:68073    | Fam173b       | 15 | 31,602,116 | 31,617,535 | 15,419 +  | 1 |
| GenelD:10061609 | 0610007N19Rik | 15 | 32,240,568 | 32,244,662 | 4,094 -   | 1 |
| GenelD:66835    | Snord123      | 15 | 32,241,845 | 32,241,932 | 87 -      | 1 |
| GenelD:20356    | Sema5a        | 15 | 32,244,813 | 32,696,341 | 451,528 + | 1 |
| GenelD:239364   | Tspyl5        | 15 | 33,683,875 | 33,687,883 | 4,008 -   | 1 |
| GenelD:67154    | Mtdh          | 15 | 34,082,719 | 34,142,385 | 59,666 +  | 1 |
| GenelD:17181    | Matn2         | 15 | 34,306,681 | 34,436,242 | 129,561 + | 2 |
| GenelD:19946    | Rpl30         | 15 | 34,440,505 | 34,443,276 | 2,771 -   | 1 |
| GenelD:239368   | BC030476      | 15 | 34,453,312 | 34,473,892 | 20,580 +  | 1 |
| GenelD:15473    | Hrsp12        | 15 | 34,484,022 | 34,495,246 | 11,224 -  | 1 |
| GenelD:67724    | Pop1          | 15 | 34,495,311 | 34,530,653 | 35,342 +  | 1 |
| GenelD:223473   | Nipal2        | 15 | 34,572,799 | 34,678,706 | 105,907 - | 1 |
| GenelD:71637    | 4930413F20Rik | 15 | 34,675,073 | 34,679,204 | 4,131 +   | 1 |
| GenelD:16539    | Kcns2         | 15 | 34,837,381 | 34,842,337 | 4,956 +   | 1 |
| GenelD:56274    | Stk3          | 15 | 34,875,499 | 35,155,806 | 280,307 - | 1 |
| GenelD:107587   | Osr2          | 15 | 35,296,112 | 35,303,305 | 7,193 +   | 3 |
| GenelD:10012626 | BC048602      | 15 | 35,307,010 | 35,328,535 | 21,525 -  | 2 |
| GenelD:666173   | Vps13b        | 15 | 35,371,546 | 35,931,229 | 559,683 + | 2 |
| GenelD:12864    | Cox6c         | 15 | 35,931,976 | 35,938,246 | 6,270 -   | 1 |
| GenelD:26942    | Spag1         | 15 | 36,179,530 | 36,235,177 | 55,647 +  | 1 |
| GenelD:30945    | Rnf19a        | 15 | 36,239,934 | 36,283,147 | 43,213 -  | 1 |
| GenelD:18458    | Pabpc1        | 15 | 36,595,658 | 36,608,973 | 13,315 -  | 1 |
| GenelD:22631    | Ywhaz         | 15 | 36,770,261 | 36,802,984 | 32,723 -  | 1 |
| GenelD:52589    | Ncald         | 15 | 37,366,175 | 37,792,428 | 426,253 - | 1 |
| GenelD:70790    | Ubr5          | 15 | 37,967,328 | 38,078,853 | 111,525 - | 1 |
| GenelD:54375    | Azin1         | 15 | 38,487,430 | 38,519,266 | 31,836 -  | 1 |
| GenelD:66335    | Atp6v1c1      | 15 | 38,661,904 | 38,692,444 | 30,540 +  | 1 |
| GenelD:69906    | Slc25a32      | 15 | 39,094,191 | 39,112,716 | 18,525 -  | 1 |
| GenelD:223499   | Dcaf13        | 15 | 39,112,874 | 39,146,856 | 33,982 +  | 1 |
| GenelD:116838   | Rims2         | 15 | 39,198,286 | 39,684,372 | 486,086 + | 2 |
| GenelD:239393   | Lrp12         | 15 | 39,870,603 | 39,943,757 | 73,154 -  | 1 |
| GenelD:22762    | Zfpm2         | 15 | 40,655,042 | 41,104,592 | 449,550 + | 1 |
| GenelD:170719   | Oxr1          | 15 | 41,447,482 | 41,861,048 | 413,566 + | 1 |
| GenelD:67429    | Nudcd1        | 15 | 44,375,227 | 44,428,307 | 53,080 -  | 1 |
| GenelD:223527   | Eny2          | 15 | 44,428,111 | 44,437,685 | 9,574 +   | 1 |
| GenelD:55960    | Ebag9         | 15 | 44,619,641 | 44,641,027 | 21,386 +  | 1 |
| GenelD:19357    | Rad21         | 15 | 51,962,604 | 51,991,760 | 29,156 -  | 1 |
| GenelD:14042    | Ext1          | 15 | 53,068,261 | 53,346,183 | 277,922 - | 1 |
| GenelD:72107    | Dscc1         | 15 | 55,076,101 | 55,090,478 | 14,377 -  | 1 |
| GenelD:10050379 | Gm9920        | 15 | 55,099,917 | 55,113,582 | 13,665 -  | 2 |
| GenelD:97998    | Deptor        | 15 | 55,112,483 | 55,254,202 | 141,719 + | 1 |
| GenelD:68537    | Mrpl13        | 15 | 55,534,095 | 55,557,312 | 23,217 -  | 1 |
| GenelD:105837   | Mtbp          | 15 | 55,557,408 | 55,626,423 | 69,015 +  | 1 |
| GenelD:20649    | Sntb1         | 15 | 55,639,154 | 55,906,949 | 267,795 - | 1 |
| GenelD:387609   | Zhx2          | 15 | 57,694,667 | 57,839,832 | 145,165 + | 1 |

|                 |               |    |            |            |           |   |
|-----------------|---------------|----|------------|------------|-----------|---|
| GenelD:75758    | 9130401M01Rik | 15 | 58,022,270 | 58,034,294 | 12,024 -  | 1 |
| GenelD:22770    | Zhx1          | 15 | 58,047,003 | 58,076,489 | 29,486 -  | 1 |
| GenelD:70472    | Atad2         | 15 | 58,094,047 | 58,135,082 | 41,035 -  | 1 |
| GenelD:76773    | Wdyhv1        | 15 | 58,141,436 | 58,158,654 | 17,218 +  | 1 |
| GenelD:67731    | Fbxo32        | 15 | 58,175,879 | 58,214,892 | 39,013 -  | 1 |
| GenelD:74868    | Tmem65        | 15 | 58,782,269 | 58,823,427 | 41,158 -  | 1 |
| GenelD:546638   | Ube2d4        | 15 | 58,823,827 | 58,847,321 | 23,494 -  | 1 |
| GenelD:75841    | Rnf139        | 15 | 58,889,229 | 58,902,390 | 13,161 +  | 1 |
| GenelD:69694    | Tatdn1        | 15 | 58,890,153 | 58,933,730 | 43,577 -  | 2 |
| GenelD:66218    | Ndufb9        | 15 | 58,933,810 | 58,939,489 | 5,679 +   | 1 |
| GenelD:211401   | Mtss1         | 15 | 58,941,234 | 59,082,026 | 140,792 - | 2 |
| GenelD:20775    | Sqle          | 15 | 59,315,092 | 59,331,193 | 16,101 +  | 1 |
| GenelD:223593   | E430025E21Rik | 15 | 59,331,997 | 59,374,152 | 42,155 -  | 1 |
| GenelD:68501    | Nsmce2        | 15 | 59,374,198 | 59,601,684 | 227,486 + | 1 |
| GenelD:211770   | Trib1         | 15 | 59,648,654 | 59,657,099 | 8,445 +   | 1 |
| GenelD:399603   | Fam84b        | 15 | 60,818,996 | 60,825,080 | 6,084 -   | 2 |
| GenelD:320469   | 9930014A18Rik | 15 | 60,822,965 | 60,831,400 | 8,435 +   | 2 |
| GenelD:17869    | Myc           | 15 | 61,985,341 | 61,990,361 | 5,020 +   | 2 |
| GenelD:13196    | Asap1         | 15 | 64,088,539 | 64,382,919 | 294,380 - | 2 |
| GenelD:76740    | Efr3a         | 15 | 65,787,041 | 65,873,812 | 86,771 +  | 1 |
| GenelD:239510   | Phf20l1       | 15 | 66,577,572 | 66,645,255 | 67,683 +  | 1 |
| GenelD:17988    | Ndrp1         | 15 | 66,929,318 | 66,969,641 | 40,323 -  | 1 |
| GenelD:76510    | Trappc9       | 15 | 72,589,620 | 73,061,204 | 471,584 - | 1 |
| GenelD:353342   | Peg13         | 15 | 72,805,604 | 72,810,324 | 4,720 -   | 1 |
| GenelD:239528   | Ago2          | 15 | 73,101,625 | 73,184,947 | 83,322 -  | 2 |
| GenelD:10050366 | 1700010B13Rik | 15 | 73,645,852 | 73,652,347 | 6,495 +   | 1 |
| GenelD:16469    | Jrk           | 15 | 74,702,412 | 74,709,322 | 6,910 -   | 1 |
| GenelD:66769    | 4933427E11Rik | 15 | 74,709,161 | 74,710,374 | 1,213 +   | 1 |
| GenelD:72373    | Psca          | 15 | 74,714,839 | 74,717,065 | 2,226 +   | 1 |
| GenelD:22701    | Zfp41         | 15 | 75,616,685 | 75,625,295 | 8,610 +   | 1 |
| GenelD:378435   | Mafa          | 15 | 75,746,843 | 75,747,922 | 1,079 -   | 1 |
| GenelD:223642   | Zc3h3         | 15 | 75,754,447 | 75,841,908 | 87,461 -  | 1 |
| GenelD:78834    | Zfp623        | 15 | 75,940,952 | 75,949,400 | 8,448 +   | 1 |
| GenelD:105782   | Scrib         | 15 | 76,047,186 | 76,069,730 | 22,544 -  | 1 |
| GenelD:67959    | Puf60         | 15 | 76,070,182 | 76,080,946 | 10,764 -  | 3 |
| GenelD:223649   | Nrbp2         | 15 | 76,085,594 | 76,090,013 | 4,419 -   | 2 |
| GenelD:223650   | Eppk1         | 15 | 76,101,488 | 76,120,195 | 18,707 -  | 2 |
| GenelD:18810    | Plec          | 15 | 76,170,974 | 76,231,378 | 60,404 -  | 5 |
| GenelD:10031677 | Mir1942       | 15 | 76,215,611 | 76,215,673 | 62 -      | 1 |
| GenelD:671535   | Parp10        | 15 | 76,232,995 | 76,243,440 | 10,445 -  | 3 |
| GenelD:66168    | Grina         | 15 | 76,246,807 | 76,249,904 | 3,097 +   | 1 |
| GenelD:109075   | Exosc4        | 15 | 76,327,397 | 76,330,670 | 3,273 +   | 1 |
| GenelD:14731    | Gpaa1         | 15 | 76,331,294 | 76,334,899 | 3,605 +   | 2 |
| GenelD:66445    | Cyc1          | 15 | 76,343,523 | 76,345,934 | 2,411 +   | 1 |
| GenelD:106025   | Sharpin       | 15 | 76,347,040 | 76,351,110 | 4,070 -   | 1 |
| GenelD:68877    | Maf1          | 15 | 76,351,294 | 76,354,378 | 3,084 +   | 1 |
| GenelD:59053    | Fam203a       | 15 | 76,368,898 | 76,371,411 | 2,513 +   | 2 |



|                 |               |    |            |            |           |   |
|-----------------|---------------|----|------------|------------|-----------|---|
| GenelD:73542    | Tssk5         | 15 | 76,371,958 | 76,374,938 | 2,980 -   | 2 |
| GenelD:223658   | Mroh1         | 15 | 76,380,513 | 76,453,039 | 72,526 +  | 3 |
| GenelD:12181    | Bop1          | 15 | 76,452,996 | 76,477,269 | 24,273 -  | 3 |
| GenelD:20289    | Scx           | 15 | 76,457,438 | 76,459,468 | 2,030 +   | 2 |
| GenelD:15499    | Hsf1          | 15 | 76,477,445 | 76,500,972 | 23,527 +  | 1 |
| GenelD:13350    | Dgat1         | 15 | 76,502,015 | 76,511,818 | 9,803 -   | 1 |
| GenelD:170729   | Scrt1         | 15 | 76,516,203 | 76,522,129 | 5,926 -   | 2 |
| GenelD:666504   | Gm8140        | 15 | 76,533,211 | 76,535,366 | 2,155 -   | 2 |
| GenelD:30840    | Fbxl6         | 15 | 76,535,723 | 76,538,746 | 3,023 -   | 1 |
| GenelD:52710    | Slc52a2       | 15 | 76,538,943 | 76,542,130 | 3,187 +   | 1 |
| GenelD:54151    | Cyhr1         | 15 | 76,645,767 | 76,660,108 | 14,341 -  | 1 |
| GenelD:16581    | Kifc2         | 15 | 76,660,641 | 76,668,196 | 7,555 +   | 2 |
| GenelD:14106    | Foxh1         | 15 | 76,668,307 | 76,669,873 | 1,566 -   | 1 |
| GenelD:73062    | Ppp1r16a      | 15 | 76,671,680 | 76,694,915 | 23,235 +  | 1 |
| GenelD:69572    | Mfsd3         | 15 | 76,701,542 | 76,704,239 | 2,697 +   | 1 |
| GenelD:79456    | Recql4        | 15 | 76,703,553 | 76,710,559 | 7,006 -   | 1 |
| GenelD:223664   | Lrrc14        | 15 | 76,710,740 | 76,715,091 | 4,351 +   | 2 |
| GenelD:378937   | Lrrc24        | 15 | 76,715,276 | 76,722,173 | 6,897 -   | 2 |
| GenelD:223665   | C030006K11Rik | 15 | 76,721,465 | 76,723,845 | 2,380 -   | 1 |
| GenelD:223666   | Arhgap39      | 15 | 76,723,985 | 76,818,170 | 94,185 -  | 2 |
| GenelD:223669   | Zfp7          | 15 | 76,879,276 | 76,892,395 | 13,119 +  | 1 |
| GenelD:66398    | Commd5        | 15 | 76,899,941 | 76,901,297 | 1,356 +   | 2 |
| GenelD:26961    | Rpl8          | 15 | 76,904,071 | 76,906,318 | 2,247 +   | 2 |
| GenelD:239546   | Zfp647        | 15 | 76,910,370 | 76,925,448 | 15,078 -  | 2 |
| GenelD:93686    | Rbfox2        | 15 | 77,078,990 | 77,307,053 | 228,063 - | 1 |
| GenelD:239552   | Apol8         | 15 | 77,748,613 | 77,755,229 | 6,616 -   | 1 |
| GenelD:17886    | Myh9          | 15 | 77,760,589 | 77,842,115 | 81,526 -  | 2 |
| GenelD:239554   | Foxred2       | 15 | 77,940,522 | 77,956,722 | 16,200 -  | 1 |
| GenelD:55944    | Eif3d         | 15 | 77,958,998 | 77,970,824 | 11,826 -  | 2 |
| GenelD:12300    | Cacng2        | 15 | 77,993,623 | 78,119,280 | 125,657 - | 1 |
| GenelD:73376    | Tex33         | 15 | 78,378,400 | 78,395,912 | 17,512 -  | 1 |
| GenelD:22117    | Tst           | 15 | 78,399,556 | 78,405,859 | 6,303 -   | 2 |
| GenelD:246221   | Mpst          | 15 | 78,406,712 | 78,414,015 | 7,303 +   | 2 |
| GenelD:72844    | Kctd17        | 15 | 78,428,628 | 78,439,303 | 10,675 +  | 2 |
| GenelD:71753    | Tmprss6       | 15 | 78,439,667 | 78,468,634 | 28,967 -  | 1 |
| GenelD:207393   | Elfn2         | 15 | 78,670,003 | 78,718,113 | 48,110 -  | 2 |
| GenelD:104445   | Cdc42ep1      | 15 | 78,842,647 | 78,850,902 | 8,255 +   | 1 |
| GenelD:107753   | Lgals2        | 15 | 78,850,860 | 78,855,529 | 4,669 -   | 1 |
| GenelD:106039   | Gga1          | 15 | 78,877,190 | 78,894,585 | 17,395 +  | 2 |
| GenelD:10003869 | Gm10866       | 15 | 78,898,207 | 78,899,712 | 1,505 -   | 1 |
| GenelD:20401    | Sh3bp1        | 15 | 78,899,786 | 78,912,052 | 12,266 +  | 2 |
| GenelD:57028    | Pdpx          | 15 | 78,913,919 | 78,919,517 | 5,598 +   | 2 |
| GenelD:16852    | Lgals1        | 15 | 78,926,725 | 78,930,465 | 3,740 +   | 1 |
| GenelD:97961    | Nol12         | 15 | 78,934,933 | 78,941,910 | 6,977 +   | 1 |
| GenelD:110253   | Triobp        | 15 | 78,947,724 | 79,005,869 | 58,145 +  | 1 |
| GenelD:654469   | Gm17753       | 15 | 79,015,329 | 79,025,954 | 10,625 -  | 2 |
| GenelD:14958    | H1f0          | 15 | 79,028,212 | 79,030,504 | 2,292 +   | 2 |

|                 |               |    |            |            |           |   |
|-----------------|---------------|----|------------|------------|-----------|---|
| GenelD:26912    | Gcat          | 15 | 79,030,874 | 79,042,531 | 11,657 +  | 2 |
| GenelD:223691   | Eif3l         | 15 | 79,075,223 | 79,094,400 | 19,177 +  | 1 |
| GenelD:27008    | Micall1       | 15 | 79,108,983 | 79,136,900 | 27,917 +  | 1 |
| GenelD:20665    | Sox10         | 15 | 79,154,913 | 79,164,490 | 9,577 -   | 1 |
| GenelD:10004165 | Gm10863       | 15 | 79,166,066 | 79,216,401 | 50,335 +  | 1 |
| GenelD:17133    | Maff          | 15 | 79,347,678 | 79,359,076 | 11,398 +  | 2 |
| GenelD:223693   | Tmem184b      | 15 | 79,360,684 | 79,403,303 | 42,619 -  | 2 |
| GenelD:16520    | Kcnj4         | 15 | 79,483,714 | 79,505,241 | 21,527 -  | 1 |
| GenelD:105785   | Kdelr3        | 15 | 79,516,408 | 79,527,739 | 11,331 +  | 1 |
| GenelD:75729    | Fam227a       | 15 | 79,609,576 | 79,658,956 | 49,380 -  | 1 |
| GenelD:73739    | Cby1          | 15 | 79,659,227 | 79,667,660 | 8,433 +   | 1 |
| GenelD:74158    | Josd1         | 15 | 79,674,250 | 79,687,872 | 13,622 -  | 2 |
| GenelD:10105594 | LOC101055940  | 15 | 79,689,125 | 79,692,385 | 3,260 -   | 2 |
| GenelD:14904    | Gtpbp1        | 15 | 79,690,896 | 79,721,479 | 30,583 +  | 2 |
| GenelD:223697   | Sun2          | 15 | 79,724,068 | 79,742,536 | 18,468 -  | 1 |
| GenelD:10050419 | Gm16576       | 15 | 79,742,698 | 79,757,394 | 14,696 +  | 1 |
| GenelD:504193   | Npcd          | 15 | 79,786,351 | 79,834,333 | 47,982 -  | 3 |
| GenelD:73340    | Nptxr         | 15 | 79,786,351 | 79,804,709 | 18,358 -  | 1 |
| GenelD:494448   | Cbx6          | 15 | 79,823,898 | 79,834,333 | 10,435 -  | 2 |
| GenelD:10003835 | Gm10856       | 15 | 79,843,163 | 79,846,763 | 3,600 +   | 1 |
| GenelD:18591    | Pdgfb         | 15 | 79,995,874 | 80,014,808 | 18,934 -  | 1 |
| GenelD:213956   | Fam83f        | 15 | 80,671,847 | 80,700,425 | 28,578 +  | 1 |
| GenelD:213988   | Tnrc6b        | 15 | 80,711,313 | 80,941,086 | 229,773 + | 1 |
| GenelD:11564    | Adsl          | 15 | 80,948,519 | 80,969,373 | 20,854 +  | 1 |
| GenelD:105835   | Sgsm3         | 15 | 80,977,765 | 81,012,290 | 34,525 +  | 1 |
| GenelD:223701   | Mkl1          | 15 | 81,012,281 | 81,190,757 | 178,476 - | 1 |
| GenelD:67638    | 4930483J18Rik | 15 | 81,190,853 | 81,192,757 | 1,904 +   | 1 |
| GenelD:70356    | St13          | 15 | 81,365,044 | 81,399,694 | 34,650 -  | 1 |
| GenelD:321003   | Xpnpep3       | 15 | 81,400,188 | 81,454,888 | 54,700 +  | 1 |
| GenelD:57755    | Dnajb7        | 15 | 81,407,088 | 81,408,273 | 1,185 -   | 1 |
| GenelD:328572   | Ep300         | 15 | 81,586,214 | 81,652,077 | 65,863 +  | 1 |
| GenelD:214669   | L3mbtl2       | 15 | 81,663,936 | 81,688,305 | 24,369 +  | 1 |
| GenelD:214685   | Chadl         | 15 | 81,686,166 | 81,697,287 | 11,121 -  | 1 |
| GenelD:19387    | Rangap1       | 15 | 81,704,248 | 81,729,919 | 25,671 -  | 2 |
| GenelD:20286    | Zc3h7b        | 15 | 81,744,848 | 81,796,269 | 51,421 +  | 2 |
| GenelD:10050431 | Gm17597       | 15 | 81,800,790 | 81,802,613 | 1,823 -   | 1 |
| GenelD:21685    | Tef           | 15 | 81,802,673 | 81,826,863 | 24,190 +  | 1 |
| GenelD:57259    | Tob2          | 15 | 81,848,270 | 81,858,326 | 10,056 -  | 1 |
| GenelD:68479    | Phf5a         | 15 | 81,864,516 | 81,871,892 | 7,376 -   | 1 |
| GenelD:78929    | Polr3h        | 15 | 81,915,030 | 81,926,213 | 11,183 -  | 1 |
| GenelD:105859   | Csdc2         | 15 | 81,936,759 | 81,950,941 | 14,182 +  | 1 |
| GenelD:29858    | Pmm1          | 15 | 81,951,106 | 81,960,867 | 9,761 -   | 1 |
| GenelD:14375    | Xrcc6         | 15 | 82,016,369 | 82,040,084 | 23,715 +  | 1 |
| GenelD:20826    | Nhp211        | 15 | 82,041,345 | 82,047,598 | 6,253 -   | 1 |
| GenelD:74369    | Mei1          | 15 | 82,070,117 | 82,126,814 | 56,697 +  | 1 |
| GenelD:76457    | Ccdc134       | 15 | 82,127,922 | 82,142,203 | 14,281 +  | 2 |
| GenelD:20788    | Srebf2        | 15 | 82,147,269 | 82,204,960 | 57,691 +  | 1 |

|                 |               |    |            |            |           |   |
|-----------------|---------------|----|------------|------------|-----------|---|
| GenelD:66570    | Cenpm         | 15 | 82,233,762 | 82,244,747 | 10,985 -  | 2 |
| GenelD:76505    | 1500009C09Rik | 15 | 82,252,397 | 82,260,753 | 8,356 +   | 1 |
| GenelD:21411    | Tcf20         | 15 | 82,808,622 | 82,912,134 | 103,512 - | 1 |
| GenelD:21378    | Tbrg3         | 15 | 82,890,483 | 82,898,461 | 7,978 -   | 1 |
| GenelD:10050463 | Gm20324       | 15 | 82,899,080 | 82,905,816 | 6,736 +   | 1 |
| GenelD:68607    | Serhl         | 15 | 83,100,205 | 83,116,671 | 16,466 +  | 1 |
| GenelD:74778    | Rrp7a         | 15 | 83,115,846 | 83,122,801 | 6,955 -   | 1 |
| GenelD:73826    | Poldip3       | 15 | 83,125,978 | 83,149,336 | 23,358 -  | 1 |
| GenelD:66251    | Arfgap3       | 15 | 83,299,740 | 83,350,247 | 50,507 -  | 1 |
| GenelD:69291    | 1700001L05Rik | 15 | 83,353,847 | 83,367,297 | 13,450 -  | 1 |
| GenelD:23970    | Pacsin2       | 15 | 83,375,607 | 83,464,606 | 88,999 -  | 1 |
| GenelD:223722   | Mcat          | 15 | 83,546,797 | 83,555,711 | 8,914 -   | 1 |
| GenelD:12257    | Tspo          | 15 | 83,563,573 | 83,574,203 | 10,630 +  | 1 |
| GenelD:223723   | Ttll12        | 15 | 83,575,094 | 83,595,157 | 20,063 -  | 1 |
| GenelD:64706    | Scube1        | 15 | 83,602,583 | 83,725,021 | 122,438 - | 2 |
| GenelD:223732   | Ldoc1l        | 15 | 84,553,398 | 84,557,823 | 4,425 -   | 1 |
| GenelD:271305   | Phf21b        | 15 | 84,785,376 | 84,856,129 | 70,753 -  | 1 |
| GenelD:18141    | Nup50         | 15 | 84,923,428 | 84,942,963 | 19,535 +  | 1 |
| GenelD:223739   | 5031439G07Rik | 15 | 84,945,720 | 84,987,971 | 42,251 -  | 1 |
| GenelD:14114    | Fbln1         | 15 | 85,206,008 | 85,286,294 | 80,286 +  | 1 |
| GenelD:54138    | Atxn10        | 15 | 85,336,381 | 85,463,836 | 127,455 + | 1 |
| GenelD:22422    | Wnt7b         | 15 | 85,535,437 | 85,581,821 | 46,384 -  | 1 |
| GenelD:105975   | AU022754      | 15 | 85,581,142 | 85,593,708 | 12,566 +  | 1 |
| GenelD:19013    | Ppara         | 15 | 85,735,564 | 85,806,851 | 71,287 +  | 1 |
| GenelD:29870    | Gtse1         | 15 | 85,859,707 | 85,876,573 | 16,866 +  | 1 |
| GenelD:72026    | Trmu          | 15 | 85,879,327 | 85,897,393 | 18,066 +  | 1 |
| GenelD:12614    | Celsr1        | 15 | 85,898,758 | 86,033,777 | 135,019 - | 1 |
| GenelD:223752   | Gramd4        | 15 | 86,057,695 | 86,137,636 | 79,941 +  | 1 |
| GenelD:223753   | Cerk          | 15 | 86,139,101 | 86,186,141 | 47,040 -  | 1 |
| GenelD:223754   | Tbc1d22a      | 15 | 86,214,459 | 86,498,503 | 284,044 + | 1 |
| GenelD:106014   | Fam19a5       | 15 | 87,544,299 | 87,759,364 | 215,065 + | 1 |
| GenelD:223770   | Brd1          | 15 | 88,687,035 | 88,734,219 | 47,184 -  | 2 |
| GenelD:223773   | Zbed4         | 15 | 88,751,711 | 88,784,516 | 32,805 +  | 1 |
| GenelD:223774   | Alg12         | 15 | 88,805,243 | 88,819,318 | 14,075 -  | 1 |
| GenelD:76737    | Creld2        | 15 | 88,819,646 | 88,826,681 | 7,035 +   | 1 |
| GenelD:223775   | Pim3          | 15 | 88,862,194 | 88,865,726 | 3,532 +   | 1 |
| GenelD:406218   | Panx2         | 15 | 89,059,726 | 89,070,907 | 11,181 +  | 2 |
| GenelD:69120    | 1810021B22Rik | 15 | 89,071,198 | 89,075,854 | 4,656 -   | 2 |
| GenelD:67976    | Trabd         | 15 | 89,076,064 | 89,087,075 | 11,011 +  | 3 |
| GenelD:223776   | 1300018J18Rik | 15 | 89,089,107 | 89,100,340 | 11,233 +  | 1 |
| GenelD:328580   | Tubgcp6       | 15 | 89,099,098 | 89,123,150 | 24,052 -  | 1 |
| GenelD:19094    | Mapk11        | 15 | 89,142,482 | 89,149,606 | 7,124 -   | 1 |
| GenelD:140570   | Plxnb2        | 15 | 89,155,549 | 89,180,788 | 25,239 -  | 3 |
| GenelD:69440    | Dennd6b       | 15 | 89,182,213 | 89,196,474 | 14,261 -  | 3 |
| GenelD:71474    | Ppp6r2        | 15 | 89,211,559 | 89,286,261 | 74,702 +  | 1 |
| GenelD:58234    | Shank3        | 15 | 89,499,857 | 89,560,261 | 60,404 +  | 1 |
| GenelD:68708    | Rabl2         | 15 | 89,582,527 | 89,591,923 | 9,396 -   | 1 |

|                 |               |    |            |            |           |   |
|-----------------|---------------|----|------------|------------|-----------|---|
| GenelD:16564    | Kif21a        | 15 | 90,933,276 | 91,049,948 | 116,672 - | 1 |
| GenelD:239606   | Slc2a13       | 15 | 91,267,691 | 91,573,261 | 305,570 - | 1 |
| GenelD:67197    | Zcrb1         | 15 | 93,386,113 | 93,398,290 | 12,177 -  | 1 |
| GenelD:223828   | Pphln1        | 15 | 93,398,350 | 93,491,913 | 93,563 +  | 1 |
| GenelD:106042   | Prickle1      | 15 | 93,499,114 | 93,595,891 | 96,777 -  | 2 |
| GenelD:223838   | Adamts20      | 15 | 94,270,163 | 94,404,350 | 134,187 - | 1 |
| GenelD:19230    | Twf1          | 15 | 94,577,948 | 94,589,824 | 11,876 -  | 1 |
| GenelD:54003    | Nell2         | 15 | 95,219,450 | 95,528,706 | 309,256 - | 1 |
| GenelD:791370   | A130051J06Rik | 15 | 95,787,856 | 95,791,642 | 3,786 -   | 1 |
| GenelD:105722   | Ano6          | 15 | 95,790,843 | 95,975,472 | 184,629 + | 1 |
| GenelD:319722   | E330033B04Rik | 15 | 96,268,564 | 96,275,275 | 6,711 -   | 1 |
| GenelD:77044    | Arid2         | 15 | 96,287,522 | 96,405,463 | 117,941 + | 2 |
| GenelD:72193    | Scaf11        | 15 | 96,411,698 | 96,460,843 | 49,145 -  | 1 |
| GenelD:105727   | Slc38a1       | 15 | 96,571,418 | 96,642,913 | 71,495 -  | 1 |
| GenelD:67760    | Slc38a2       | 15 | 96,687,392 | 96,699,698 | 12,306 -  | 1 |
| GenelD:71919    | Rpap3         | 15 | 97,675,105 | 97,705,822 | 30,717 -  | 1 |
| GenelD:19011    | Endou         | 15 | 97,711,019 | 97,731,405 | 20,386 -  | 1 |
| GenelD:380967   | Tmem106c      | 15 | 97,964,229 | 97,970,286 | 6,057 +   | 1 |
| GenelD:78541    | Asb8          | 15 | 98,134,640 | 98,165,578 | 30,938 -  | 1 |
| GenelD:239650   | Al836003      | 15 | 98,167,806 | 98,170,134 | 2,328 +   | 1 |
| GenelD:69612    | Kansl2        | 15 | 98,519,101 | 98,534,221 | 15,120 -  | 1 |
| GenelD:10021741 | Snora2b       | 15 | 98,526,348 | 98,526,459 | 111 -     | 1 |
| GenelD:12455    | Ccnt1         | 15 | 98,543,211 | 98,567,636 | 24,425 -  | 2 |
| GenelD:10004889 | 9330020H09Rik | 15 | 98,567,324 | 98,570,864 | 3,540 +   | 1 |
| GenelD:73863    | 4930415O20Rik | 15 | 98,571,004 | 98,589,588 | 18,584 +  | 1 |
| GenelD:11512    | Adcy6         | 15 | 98,589,978 | 98,607,633 | 17,655 -  | 1 |
| GenelD:12297    | Cacnb3        | 15 | 98,632,220 | 98,644,530 | 12,310 +  | 1 |
| GenelD:74351    | Ddx23         | 15 | 98,645,507 | 98,662,889 | 17,382 -  | 1 |
| GenelD:223881   | Rnd1          | 15 | 98,669,205 | 98,677,461 | 8,256 -   | 1 |
| GenelD:11842    | Arf3          | 15 | 98,737,626 | 98,763,118 | 25,492 -  | 1 |
| GenelD:22410    | Wnt10b        | 15 | 98,771,752 | 98,778,150 | 6,398 -   | 1 |
| GenelD:13199    | Ddn           | 15 | 98,803,782 | 98,807,925 | 4,143 -   | 1 |
| GenelD:10004916 | B130046B21Rik | 15 | 98,807,024 | 98,816,320 | 9,296 +   | 1 |
| GenelD:19082    | Prkag1        | 15 | 98,812,797 | 98,831,508 | 18,711 -  | 2 |
| GenelD:381022   | Mll2          | 15 | 98,831,669 | 98,871,205 | 39,536 -  | 4 |
| GenelD:69159    | Rhebl1        | 15 | 98,877,760 | 98,881,414 | 3,654 -   | 1 |
| GenelD:13363    | Dhh           | 15 | 98,893,027 | 98,898,540 | 5,513 -   | 2 |
| GenelD:74775    | Lmbr1l        | 15 | 98,903,921 | 98,918,098 | 14,177 -  | 3 |
| GenelD:22143    | Tuba1b        | 15 | 98,931,429 | 98,934,390 | 2,961 -   | 1 |
| GenelD:22142    | Tuba1a        | 15 | 98,949,847 | 98,953,501 | 3,654 -   | 1 |
| GenelD:22146    | Tuba1c        | 15 | 99,029,891 | 99,038,105 | 8,214 +   | 1 |
| GenelD:19132    | Prph          | 15 | 99,055,174 | 99,058,978 | 3,804 +   | 1 |
| GenelD:78733    | Troap         | 15 | 99,074,973 | 99,083,409 | 8,436 +   | 1 |
| GenelD:239659   | C1ql4         | 15 | 99,084,754 | 99,087,728 | 2,974 -   | 1 |
| GenelD:72778    | Dnajc22       | 15 | 99,099,484 | 99,104,709 | 5,225 +   | 1 |
| GenelD:16512    | Kcnh3         | 15 | 99,224,976 | 99,242,817 | 17,841 +  | 1 |
| GenelD:51812    | Mcrs1         | 15 | 99,242,817 | 99,251,961 | 9,144 -   | 1 |

|               |               |    |             |             |           |   |
|---------------|---------------|----|-------------|-------------|-----------|---|
| GenelD:73600  | 1700120C14Rik | 15 | 99,251,788  | 99,262,041  | 10,253 +  | 1 |
| GenelD:380969 | Nckap5l       | 15 | 99,422,034  | 99,457,748  | 35,714 -  | 1 |
| GenelD:75284  | Bcdin3d       | 15 | 99,470,084  | 99,474,730  | 4,646 -   | 1 |
| GenelD:26934  | Racgap1       | 15 | 99,620,496  | 99,651,656  | 31,160 -  | 1 |
| GenelD:71949  | Cers5         | 15 | 99,735,592  | 99,772,515  | 36,923 -  | 1 |
| GenelD:65970  | Lima1         | 15 | 99,778,468  | 99,875,456  | 96,988 -  | 1 |
| GenelD:207214 | Larp4         | 15 | 99,970,074  | 100,016,358 | 46,284 +  | 1 |
| GenelD:70281  | 2310068J16Rik | 15 | 99,972,167  | 99,973,287  | 1,120 -   | 1 |
| GenelD:239667 | Dip2b         | 15 | 100,038,664 | 100,219,473 | 180,809 + | 1 |
| GenelD:18174  | Slc11a2       | 15 | 100,387,898 | 100,423,055 | 35,157 -  | 1 |
| GenelD:432982 | Gm5475        | 15 | 100,423,193 | 100,428,150 | 4,957 +   | 1 |
| GenelD:68614  | Letmd1        | 15 | 100,469,034 | 100,479,252 | 10,218 +  | 1 |
| GenelD:207785 | Csrnp2        | 15 | 100,479,570 | 100,495,239 | 15,669 -  | 2 |
| GenelD:21422  | Tfcp2         | 15 | 100,502,796 | 100,551,947 | 49,151 -  | 1 |
| GenelD:78445  | C330013E15Rik | 15 | 100,614,140 | 100,615,110 | 970 -     | 1 |
| GenelD:23994  | Dazap2        | 15 | 100,615,662 | 100,620,761 | 5,099 +   | 1 |
| GenelD:207818 | Smagp         | 15 | 100,621,339 | 100,636,865 | 15,526 -  | 1 |
| GenelD:20273  | Scn8a         | 15 | 100,870,683 | 101,045,929 | 175,246 + | 3 |
| GenelD:668225 | Figl2         | 15 | 101,050,194 | 101,054,399 | 4,205 -   | 3 |
| GenelD:208258 | Ankrd33       | 15 | 101,115,755 | 101,120,028 | 4,273 +   | 1 |
| GenelD:11482  | Acvrl1        | 15 | 101,128,537 | 101,145,336 | 16,799 +  | 1 |
| GenelD:380977 | A330009N23Rik | 15 | 101,221,191 | 101,225,186 | 3,995 -   | 1 |
| GenelD:105968 | AU021063      | 15 | 101,221,247 | 101,222,155 | 908 +     | 1 |
| GenelD:56149  | Grasp         | 15 | 101,224,207 | 101,232,756 | 8,549 +   | 1 |
| GenelD:15370  | Nr4a1         | 15 | 101,266,846 | 101,274,795 | 7,949 +   | 2 |
| GenelD:68118  | 9430023L20Rik | 15 | 101,284,301 | 101,290,934 | 6,633 +   | 2 |
| GenelD:77717  | 6030408B16Rik | 15 | 101,293,212 | 101,297,426 | 4,214 +   | 2 |
| GenelD:75705  | Eif4b         | 15 | 102,073,773 | 102,097,173 | 23,400 +  | 2 |
| GenelD:109237 | A030007N12Rik | 15 | 102,077,424 | 102,080,224 | 2,800 +   | 1 |
| GenelD:209039 | Tenc1         | 15 | 102,102,988 | 102,116,401 | 13,413 +  | 1 |
| GenelD:223918 | Spryd3        | 15 | 102,116,528 | 102,136,215 | 19,687 -  | 2 |
| GenelD:16012  | Igfbp6        | 15 | 102,144,186 | 102,149,512 | 5,326 +   | 2 |
| GenelD:223920 | Soat2         | 15 | 102,150,575 | 102,163,436 | 12,861 +  | 1 |
| GenelD:19411  | Rarg          | 15 | 102,234,940 | 102,257,483 | 22,543 -  | 1 |
| GenelD:432988 | Gm9918        | 15 | 102,270,569 | 102,274,128 | 3,559 +   | 2 |
| GenelD:106073 | Mfsd5         | 15 | 102,279,456 | 102,281,744 | 2,288 +   | 2 |
| GenelD:105988 | Espl1         | 15 | 102,296,293 | 102,324,356 | 28,063 +  | 2 |
| GenelD:223921 | Aaas          | 15 | 102,338,247 | 102,350,759 | 12,512 -  | 1 |
| GenelD:170574 | Sp7           | 15 | 102,357,177 | 102,366,271 | 9,094 -   | 1 |
| GenelD:66151  | Prr13         | 15 | 102,459,170 | 102,462,806 | 3,636 +   | 1 |
| GenelD:18521  | Pcbp2         | 15 | 102,470,632 | 102,500,059 | 29,427 +  | 1 |
| GenelD:15422  | Hoxc13        | 15 | 102,921,131 | 102,928,814 | 7,683 +   | 1 |
| GenelD:209448 | Hoxc10        | 15 | 102,966,796 | 102,971,898 | 5,102 +   | 1 |
| GenelD:723958 | Mir196a-2     | 15 | 102,973,350 | 102,973,434 | 84 +      | 1 |
| GenelD:15427  | Hoxc9         | 15 | 102,977,032 | 102,984,444 | 7,412 +   | 1 |
| GenelD:15426  | Hoxc8         | 15 | 102,990,539 | 102,994,254 | 3,715 +   | 1 |
| GenelD:12419  | Cbx5          | 15 | 103,191,546 | 103,239,816 | 48,270 -  | 1 |

|                 |               |    |             |             |           |   |
|-----------------|---------------|----|-------------|-------------|-----------|---|
| GenelD:16402    | Itga5         | 15 | 103,344,286 | 103,366,748 | 22,462 -  | 1 |
| GenelD:74763    | Naa60         | 16 | 3,884,619   | 3,904,781   | 20,162 +  | 1 |
| GenelD:68015    | Trap1         | 16 | 4,039,977   | 4,077,810   | 37,833 -  | 1 |
| GenelD:12914    | Crebbp        | 16 | 4,084,048   | 4,213,404   | 129,356 - | 2 |
| GenelD:76397    | 4930455F16Rik | 16 | 4,219,912   | 4,229,116   | 9,204 -   | 1 |
| GenelD:11515    | Adcy9         | 16 | 4,287,545   | 4,419,587   | 132,042 - | 1 |
| GenelD:83383    | Tfap4         | 16 | 4,544,661   | 4,559,720   | 15,059 -  | 1 |
| GenelD:83396    | Glis2         | 16 | 4,594,713   | 4,615,957   | 21,244 +  | 1 |
| GenelD:78885    | Coro7         | 16 | 4,626,884   | 4,679,720   | 52,836 -  | 2 |
| GenelD:246154   | Vasn          | 16 | 4,639,945   | 4,651,166   | 11,221 +  | 2 |
| GenelD:67824    | Nmral1        | 16 | 4,711,317   | 4,719,059   | 7,742 -   | 1 |
| GenelD:15369    | Hmox2         | 16 | 4,726,361   | 4,766,249   | 39,888 +  | 1 |
| GenelD:66626    | Cdip1         | 16 | 4,765,461   | 4,789,935   | 24,474 -  | 1 |
| GenelD:10016986 | Gm10914       | 16 | 4,868,829   | 4,870,724   | 1,895 -   | 1 |
| GenelD:207740   | Ubal1         | 16 | 4,874,779   | 4,879,851   | 5,072 -   | 1 |
| GenelD:17237    | Mgrn1         | 16 | 4,886,100   | 4,938,296   | 52,196 +  | 1 |
| GenelD:72615    | Anks3         | 16 | 4,941,415   | 4,964,237   | 22,822 -  | 1 |
| GenelD:74684    | 4930451G09Rik | 16 | 4,964,289   | 4,978,963   | 14,674 +  | 1 |
| GenelD:74022    | Glyr1         | 16 | 5,013,902   | 5,049,910   | 36,008 -  | 1 |
| GenelD:170644   | Ubn1          | 16 | 5,050,068   | 5,086,285   | 36,217 +  | 1 |
| GenelD:27426    | Nagpa         | 16 | 5,195,280   | 5,204,012   | 8,732 -   | 1 |
| GenelD:239691   | AU021092      | 16 | 5,211,819   | 5,222,299   | 10,480 -  | 1 |
| GenelD:208211   | Alg1          | 16 | 5,233,621   | 5,244,907   | 11,286 +  | 1 |
| GenelD:70511    | Fam86         | 16 | 5,244,155   | 5,255,956   | 11,801 -  | 1 |
| GenelD:66690    | Tmem186       | 16 | 8,633,731   | 8,637,701   | 3,970 -   | 1 |
| GenelD:54128    | Pmm2          | 16 | 8,637,707   | 8,657,524   | 19,817 +  | 1 |
| GenelD:52502    | Carhsp1       | 16 | 8,658,587   | 8,672,153   | 13,566 -  | 1 |
| GenelD:436336   | Gm5767        | 16 | 8,680,770   | 8,683,905   | 3,135 +   | 1 |
| GenelD:252870   | Usp7          | 16 | 8,688,722   | 8,738,342   | 49,620 -  | 1 |
| GenelD:69053    | 1810013L24Rik | 16 | 8,830,100   | 8,858,924   | 28,824 +  | 1 |
| GenelD:75329    | Atf7ip2       | 16 | 10,192,906  | 10,243,051  | 50,145 +  | 1 |
| GenelD:12703    | Socs1         | 16 | 10,783,808  | 10,785,536  | 1,728 -   | 1 |
| GenelD:21959    | Tnp2          | 16 | 10,787,935  | 10,788,655  | 720 -     | 1 |
| GenelD:19120    | Prm3          | 16 | 10,790,508  | 10,790,914  | 406 -     | 1 |
| GenelD:19119    | Prm2          | 16 | 10,791,381  | 10,792,097  | 716 -     | 1 |
| GenelD:223970   | Rmi2          | 16 | 10,835,059  | 10,843,235  | 8,176 +   | 1 |
| GenelD:56722    | Litaf         | 16 | 10,959,273  | 10,993,121  | 33,848 -  | 1 |
| GenelD:20621    | Snn           | 16 | 11,066,298  | 11,074,985  | 8,687 +   | 1 |
| GenelD:106200   | Txndc11       | 16 | 11,074,911  | 11,134,532  | 59,621 -  | 1 |
| GenelD:66409    | Rsl1d1        | 16 | 11,193,037  | 11,203,292  | 10,255 -  | 1 |
| GenelD:69918    | 2610020C07Rik | 16 | 11,203,383  | 11,225,796  | 22,413 +  | 1 |
| GenelD:14852    | Gspt1         | 16 | 11,216,240  | 11,254,325  | 38,085 -  | 1 |
| GenelD:10031683 | Mir1945       | 16 | 11,254,368  | 11,254,445  | 77 -      | 1 |
| GenelD:239719   | Mkl2          | 16 | 13,256,481  | 13,417,529  | 161,048 + | 1 |
| GenelD:10012443 | Mir193b       | 16 | 13,449,523  | 13,449,601  | 78 +      | 1 |
| GenelD:723899   | Mir365-1      | 16 | 13,453,840  | 13,453,926  | 86 +      | 1 |
| GenelD:74108    | Parn          | 16 | 13,537,964  | 13,668,170  | 130,206 - | 1 |

|                 |               |    |            |            |           |   |
|-----------------|---------------|----|------------|------------|-----------|---|
| GenelD:67118    | Bfar          | 16 | 13,671,858 | 13,703,612 | 31,754 +  | 1 |
| GenelD:66598    | 3110001I22Rik | 16 | 13,672,020 | 13,678,385 | 6,365 +   | 1 |
| GenelD:106298   | Rrn3          | 16 | 13,780,699 | 13,814,841 | 34,142 +  | 2 |
| GenelD:18203    | Ntan1         | 16 | 13,819,277 | 13,835,450 | 16,173 +  | 1 |
| GenelD:94184    | Pdxdc1        | 16 | 13,833,930 | 13,903,135 | 69,205 -  | 1 |
| GenelD:12609    | Cebpd         | 16 | 15,887,286 | 15,889,545 | 2,259 +   | 1 |
| GenelD:224008   | 2310008H04Rik | 16 | 15,889,227 | 16,146,833 | 257,606 - | 1 |
| GenelD:70120    | Yars2         | 16 | 16,302,965 | 16,309,640 | 6,675 +   | 1 |
| GenelD:74006    | Dnm1l         | 16 | 16,312,233 | 16,359,030 | 46,797 -  | 2 |
| GenelD:16136    | Igll1         | 16 | 16,860,671 | 16,863,985 | 3,314 -   | 1 |
| GenelD:22362    | Vpreb1        | 16 | 16,868,401 | 16,869,255 | 854 -     | 1 |
| GenelD:21976    | Top3b         | 16 | 16,870,891 | 16,892,986 | 22,095 +  | 1 |
| GenelD:26413    | Mapk1         | 16 | 16,983,382 | 17,047,453 | 64,071 +  | 1 |
| GenelD:70458    | 2610318N02Rik | 16 | 17,113,398 | 17,125,106 | 11,708 -  | 1 |
| GenelD:723816   | Mir130b       | 16 | 17,124,061 | 17,124,142 | 81 -      | 1 |
| GenelD:791069   | Mir301b       | 16 | 17,124,400 | 17,124,496 | 96 -      | 1 |
| GenelD:64136    | Sdf2l1        | 16 | 17,130,138 | 17,132,383 | 2,245 -   | 1 |
| GenelD:623568   | Gm6440        | 16 | 17,137,288 | 17,137,708 | 420 +     | 1 |
| GenelD:76872    | Ccdc116       | 16 | 17,139,064 | 17,144,423 | 5,359 -   | 1 |
| GenelD:22195    | Ube2l3        | 16 | 17,152,015 | 17,201,492 | 49,477 -  | 2 |
| GenelD:239731   | Rimbp3        | 16 | 17,208,135 | 17,213,982 | 5,847 +   | 2 |
| GenelD:58180    | Hic2          | 16 | 17,233,587 | 17,263,430 | 29,843 +  | 1 |
| GenelD:224020   | Pi4ka         | 16 | 17,280,351 | 17,406,314 | 125,963 - | 1 |
| GenelD:67474    | Snap29        | 16 | 17,406,000 | 17,430,826 | 24,826 +  | 1 |
| GenelD:12929    | Crkl          | 16 | 17,451,987 | 17,486,255 | 34,268 +  | 1 |
| GenelD:66863    | Lztr1         | 16 | 17,508,971 | 17,526,330 | 17,359 +  | 1 |
| GenelD:69009    | Thap7         | 16 | 17,527,982 | 17,531,052 | 3,070 -   | 1 |
| GenelD:77626    | Smpd4         | 16 | 17,619,354 | 17,644,830 | 25,476 +  | 1 |
| GenelD:94112    | Med15         | 16 | 17,651,221 | 17,722,930 | 71,709 -  | 1 |
| GenelD:224023   | Klhl22        | 16 | 17,759,621 | 17,793,382 | 33,761 +  | 3 |
| GenelD:224024   | Scarf2        | 16 | 17,797,282 | 17,808,287 | 11,005 +  | 3 |
| GenelD:433004   | B830017H08Rik | 16 | 17,833,119 | 17,835,019 | 1,900 +   | 1 |
| GenelD:80733    | Car15         | 16 | 17,835,276 | 17,838,186 | 2,910 -   | 1 |
| GenelD:13356    | Dgcr2         | 16 | 17,840,355 | 17,891,728 | 51,373 -  | 2 |
| GenelD:22114    | Tssk1         | 16 | 17,894,203 | 17,895,653 | 1,450 +   | 1 |
| GenelD:22115    | Tssk2         | 16 | 17,898,637 | 17,900,024 | 1,387 +   | 1 |
| GenelD:27886    | Dgcr14        | 16 | 17,900,709 | 17,911,348 | 10,639 -  | 1 |
| GenelD:13358    | Slc25a1       | 16 | 17,925,211 | 17,928,219 | 3,008 -   | 1 |
| GenelD:27801    | Zdhhc8        | 16 | 18,220,753 | 18,235,136 | 14,383 -  | 1 |
| GenelD:19385    | Ranbp1        | 16 | 18,239,979 | 18,248,694 | 8,715 -   | 2 |
| GenelD:15547    | Trmt2a        | 16 | 18,248,883 | 18,254,772 | 5,889 +   | 1 |
| GenelD:94223    | Dgcr8         | 16 | 18,253,964 | 18,289,168 | 35,204 -  | 2 |
| GenelD:10031681 | Mir1306       | 16 | 18,284,239 | 18,284,317 | 78 -      | 1 |
| GenelD:11877    | Arvcf         | 16 | 18,348,274 | 18,407,076 | 58,802 +  | 1 |
| GenelD:13972    | Gnb1l         | 16 | 18,498,768 | 18,566,679 | 67,911 +  | 1 |
| GenelD:21380    | Tbx1          | 16 | 18,581,713 | 18,586,969 | 5,256 -   | 3 |
| GenelD:619305   | 4930588K23Rik | 16 | 18,591,992 | 18,609,751 | 17,759 +  | 3 |

|                 |               |    |            |            |           |   |
|-----------------|---------------|----|------------|------------|-----------|---|
| GenelD:12741    | Cldn5         | 16 | 18,776,847 | 18,778,262 | 1,415 +   | 1 |
| GenelD:12544    | Cdc45         | 16 | 18,780,447 | 18,811,972 | 31,525 -  | 1 |
| GenelD:18100    | Mrpl40        | 16 | 18,872,018 | 18,876,637 | 4,619 -   | 1 |
| GenelD:15260    | Hira          | 16 | 18,876,750 | 18,970,309 | 93,559 +  | 1 |
| GenelD:108105   | B3gnt5        | 16 | 19,760,234 | 19,772,753 | 12,519 +  | 1 |
| GenelD:75785    | Klhl24        | 16 | 20,097,554 | 20,127,744 | 30,190 +  | 1 |
| GenelD:208146   | Yeats2        | 16 | 20,141,063 | 20,232,573 | 91,510 +  | 1 |
| GenelD:381038   | Parl          | 16 | 20,279,820 | 20,302,362 | 22,542 -  | 1 |
| GenelD:224044   | Cyp2ab1       | 16 | 20,308,387 | 20,325,404 | 17,017 -  | 1 |
| GenelD:27416    | Abcc5         | 16 | 20,331,303 | 20,426,394 | 95,091 -  | 1 |
| GenelD:224045   | Eif2b5        | 16 | 20,498,817 | 20,509,325 | 10,508 +  | 1 |
| GenelD:10050429 | Gm16618       | 16 | 20,510,763 | 20,517,766 | 7,003 -   | 1 |
| GenelD:13544    | Dvl3          | 16 | 20,517,064 | 20,532,187 | 15,123 +  | 1 |
| GenelD:208624   | Alg3          | 16 | 20,605,458 | 20,610,749 | 5,291 -   | 1 |
| GenelD:107522   | Ece2          | 16 | 20,611,601 | 20,645,915 | 34,314 +  | 1 |
| GenelD:73047    | Camk2n2       | 16 | 20,619,215 | 20,621,278 | 2,063 -   | 1 |
| GenelD:21762    | Psmd2         | 16 | 20,651,652 | 20,663,414 | 11,762 +  | 1 |
| GenelD:208643   | Eif4g1        | 16 | 20,672,749 | 20,692,883 | 20,134 +  | 2 |
| GenelD:78408    | Fam131a       | 16 | 20,695,057 | 20,703,036 | 7,979 +   | 1 |
| GenelD:12724    | Clcn2         | 16 | 20,702,966 | 20,716,636 | 13,670 -  | 3 |
| GenelD:245841   | Polr2h        | 16 | 20,717,826 | 20,722,265 | 4,439 +   | 2 |
| GenelD:21832    | Thpo          | 16 | 20,724,454 | 20,734,511 | 10,057 -  | 3 |
| GenelD:12667    | Chrd          | 16 | 20,733,127 | 20,742,384 | 9,257 +   | 1 |
| GenelD:72190    | 2510009E07Rik | 16 | 21,649,045 | 21,694,665 | 45,620 -  | 1 |
| GenelD:66664    | Tmem41a       | 16 | 21,934,327 | 21,947,552 | 13,225 -  | 1 |
| GenelD:239759   | Liph          | 16 | 21,953,817 | 21,995,542 | 41,725 -  | 1 |
| GenelD:319765   | Igf2bp2       | 16 | 22,059,009 | 22,163,299 | 104,290 - | 2 |
| GenelD:20462    | Tra2b         | 16 | 22,245,741 | 22,265,929 | 20,188 -  | 1 |
| GenelD:104156   | Etv5          | 16 | 22,381,313 | 22,439,570 | 58,257 -  | 1 |
| GenelD:13682    | Eif4a2        | 16 | 23,107,479 | 23,114,132 | 6,653 +   | 1 |
| GenelD:10021653 | Snord2        | 16 | 23,108,953 | 23,109,020 | 67 +      | 1 |
| GenelD:10021742 | Snora81       | 16 | 23,110,770 | 23,110,933 | 163 +     | 1 |
| GenelD:106344   | Rfc4          | 16 | 23,113,948 | 23,127,730 | 13,782 -  | 1 |
| GenelD:12053    | Bcl6          | 16 | 23,965,052 | 23,988,612 | 23,560 -  | 1 |
| GenelD:210530   | Leprel1       | 16 | 25,960,323 | 26,105,784 | 145,461 - | 1 |
| GenelD:67501    | Ccdc50        | 16 | 27,388,977 | 27,452,218 | 63,241 +  | 1 |
| GenelD:14167    | Fgf12         | 16 | 28,160,098 | 28,753,202 | 593,104 - | 1 |
| GenelD:239796   | Mb21d2        | 16 | 28,826,176 | 28,929,698 | 103,522 - | 2 |
| GenelD:10004310 | 4632428C04Rik | 16 | 30,008,667 | 30,021,430 | 12,763 +  | 1 |
| GenelD:15205    | Hes1          | 16 | 30,065,357 | 30,067,796 | 2,439 +   | 2 |
| GenelD:224088   | Atp13a3       | 16 | 30,312,423 | 30,388,530 | 76,107 -  | 1 |
| GenelD:224093   | Fam43a        | 16 | 30,599,723 | 30,602,797 | 3,074 +   | 1 |
| GenelD:78618    | Acap2         | 16 | 31,092,413 | 31,201,238 | 108,825 - | 1 |
| GenelD:66849    | Ppp1r2        | 16 | 31,251,541 | 31,275,277 | 23,736 -  | 1 |
| GenelD:71911    | Bdh1          | 16 | 31,422,297 | 31,458,901 | 36,604 +  | 1 |
| GenelD:239827   | Pigz          | 16 | 31,933,851 | 31,946,046 | 12,195 +  | 1 |
| GenelD:106264   | 0610012G03Rik | 16 | 31,947,051 | 31,948,521 | 1,470 -   | 1 |



|                 |               |    |            |            |           |   |
|-----------------|---------------|----|------------|------------|-----------|---|
| GenelD:68092    | Ncbp2         | 16 | 31,948,546 | 31,958,472 | 9,926 +   | 1 |
| GenelD:320213   | Senp5         | 16 | 31,959,670 | 32,003,287 | 43,617 -  | 1 |
| GenelD:224111   | Ubxn7         | 16 | 32,332,252 | 32,393,747 | 61,495 +  | 1 |
| GenelD:66061    | Tctex1d2      | 16 | 32,419,702 | 32,428,892 | 9,190 +   | 1 |
| GenelD:13026    | Pcyt1a        | 16 | 32,430,921 | 32,475,065 | 44,144 +  | 1 |
| GenelD:22042    | Tfrc          | 16 | 32,608,896 | 32,632,794 | 23,898 +  | 1 |
| GenelD:51789    | Tnk2          | 16 | 32,644,643 | 32,683,493 | 38,850 +  | 1 |
| GenelD:10050269 | 1700021K19Rik | 16 | 32,821,702 | 32,868,366 | 46,664 -  | 1 |
| GenelD:69823    | Fyttd1        | 16 | 32,877,784 | 32,908,963 | 31,179 +  | 2 |
| GenelD:70144    | Lrch3         | 16 | 32,914,100 | 33,016,029 | 101,929 + | 1 |
| GenelD:625660   | Gm6611        | 16 | 32,922,987 | 32,924,486 | 1,499 +   | 1 |
| GenelD:69707    | Iqcg          | 16 | 33,014,270 | 33,056,186 | 41,916 -  | 2 |
| GenelD:57808    | Rpl35a        | 16 | 33,056,453 | 33,060,189 | 3,736 +   | 2 |
| GenelD:239833   | Lmln          | 16 | 33,062,521 | 33,125,659 | 63,138 +  | 2 |
| GenelD:106326   | Osbpl11       | 16 | 33,185,071 | 33,243,312 | 58,241 +  | 2 |
| GenelD:69150    | Snx4          | 16 | 33,251,456 | 33,299,562 | 48,106 +  | 1 |
| GenelD:10050274 | 1700007L15Rik | 16 | 33,379,854 | 33,380,736 | 882 -     | 1 |
| GenelD:22661    | Zfp148        | 16 | 33,380,775 | 33,503,903 | 123,128 + | 1 |
| GenelD:77446    | Heg1          | 16 | 33,684,466 | 33,768,195 | 83,729 +  | 1 |
| GenelD:22247    | Umps          | 16 | 33,955,012 | 33,967,003 | 11,991 -  | 1 |
| GenelD:545156   | Kalrn         | 16 | 33,969,073 | 34,514,027 | 544,954 - | 1 |
| GenelD:107589   | Mylk          | 16 | 34,784,950 | 35,002,434 | 217,484 + | 1 |
| GenelD:70757    | Ptplb         | 16 | 35,022,421 | 35,109,175 | 86,754 +  | 1 |
| GenelD:224129   | Adcy5         | 16 | 35,155,636 | 35,304,549 | 148,913 + | 1 |
| GenelD:317717   | Sec22a        | 16 | 35,311,131 | 35,363,918 | 52,787 -  | 1 |
| GenelD:72599    | Pdia5         | 16 | 35,397,312 | 35,490,873 | 93,561 -  | 1 |
| GenelD:20357    | Sema5b        | 16 | 35,541,362 | 35,664,258 | 122,896 + | 2 |
| GenelD:224132   | Dirc2         | 16 | 35,694,903 | 35,769,356 | 74,453 -  | 2 |
| GenelD:66667    | Hspbap1       | 16 | 35,770,386 | 35,828,462 | 58,076 +  | 2 |
| GenelD:70186    | Fam162a       | 16 | 36,043,844 | 36,071,515 | 27,671 -  | 1 |
| GenelD:381045   | Ccdc58        | 16 | 36,071,660 | 36,092,118 | 20,458 +  | 1 |
| GenelD:14314    | Fstl1         | 16 | 37,777,055 | 37,836,516 | 59,461 +  | 1 |
| GenelD:320184   | Lrrc58        | 16 | 37,868,400 | 37,888,857 | 20,457 +  | 1 |
| GenelD:414072   | BC031361      | 16 | 38,085,064 | 38,089,260 | 4,196 -   | 1 |
| GenelD:56637    | Gsk3b         | 16 | 38,089,001 | 38,246,079 | 157,078 + | 1 |
| GenelD:11544    | Adprh         | 16 | 38,445,399 | 38,452,689 | 7,290 -   | 1 |
| GenelD:12519    | Cd80          | 16 | 38,458,933 | 38,486,933 | 28,000 +  | 1 |
| GenelD:224143   | Poglut1       | 16 | 38,525,180 | 38,550,184 | 25,004 -  | 1 |
| GenelD:67846    | Tmem39a       | 16 | 38,558,698 | 38,592,162 | 33,464 +  | 1 |
| GenelD:12549    | Arhgap31      | 16 | 38,598,343 | 38,713,035 | 114,692 - | 1 |
| GenelD:56375    | B4galt4       | 16 | 38,742,264 | 38,769,045 | 26,781 +  | 1 |
| GenelD:332175   | Zdhhc23       | 16 | 43,969,146 | 43,979,050 | 9,904 -   | 1 |
| GenelD:207798   | Gramd1c       | 16 | 43,980,350 | 44,027,945 | 47,595 -  | 1 |
| GenelD:11964    | Atp6v1a       | 16 | 44,085,404 | 44,139,019 | 53,615 -  | 1 |
| GenelD:72117    | Naa50         | 16 | 44,139,809 | 44,163,364 | 23,555 +  | 2 |
| GenelD:207806   | Gm608         | 16 | 44,173,397 | 44,227,465 | 54,068 +  | 1 |
| GenelD:212514   | Spice1        | 16 | 44,347,401 | 44,388,492 | 41,091 +  | 1 |

|                 |               |    |            |            |           |   |
|-----------------|---------------|----|------------|------------|-----------|---|
| GenelD:117606   | Boc           | 16 | 44,485,045 | 44,558,870 | 73,825 -  | 1 |
| GenelD:10052647 | Mir3081       | 16 | 44,558,046 | 44,558,129 | 83 -      | 1 |
| GenelD:212547   | BC027231      | 16 | 44,724,301 | 44,737,284 | 12,983 +  | 1 |
| GenelD:74102    | Slc35a5       | 16 | 45,139,573 | 45,158,673 | 19,100 -  | 1 |
| GenelD:67841    | Atg3          | 16 | 45,158,829 | 45,188,538 | 29,709 +  | 1 |
| GenelD:17470    | Cd200         | 16 | 45,382,135 | 45,409,053 | 26,918 -  | 1 |
| GenelD:208166   | Gm609         | 16 | 45,416,755 | 45,492,969 | 76,214 -  | 1 |
| GenelD:58998    | Pvrl3         | 16 | 46,394,858 | 46,496,967 | 102,109 - | 1 |
| GenelD:224170   | Dzip3         | 16 | 48,924,228 | 48,994,112 | 69,884 -  | 1 |
| GenelD:224171   | C330027C09Rik | 16 | 48,994,188 | 49,019,705 | 25,517 +  | 1 |
| GenelD:73916    | Ift57         | 16 | 49,699,294 | 49,765,126 | 65,832 +  | 1 |
| GenelD:16423    | Cd47          | 16 | 49,855,654 | 49,911,688 | 56,034 +  | 2 |
| GenelD:70508    | Bbx           | 16 | 50,191,844 | 50,432,389 | 240,545 - | 1 |
| GenelD:619312   | G730013B05Rik | 16 | 50,526,245 | 50,559,459 | 33,214 +  | 1 |
| GenelD:208650   | Cblb          | 16 | 52,031,549 | 52,208,047 | 176,498 + | 1 |
| GenelD:80859    | Nfkbiz        | 16 | 55,811,377 | 55,838,641 | 27,264 -  | 1 |
| GenelD:629242   | Gm6958        | 16 | 55,961,315 | 55,965,054 | 3,739 +   | 2 |
| GenelD:68193    | Rpl24         | 16 | 55,966,275 | 55,971,437 | 5,162 +   | 2 |
| GenelD:66391    | 2310061J03Rik | 16 | 55,973,268 | 55,974,617 | 1,349 -   | 2 |
| GenelD:271377   | Zbtb11        | 16 | 55,973,804 | 56,008,913 | 35,109 +  | 2 |
| GenelD:76302    | Pcnp          | 16 | 56,015,508 | 56,029,717 | 14,209 -  | 2 |
| GenelD:52575    | Trmt10c       | 16 | 56,033,720 | 56,037,774 | 4,054 -   | 2 |
| GenelD:28185    | Tomm70a       | 16 | 57,121,714 | 57,154,530 | 32,816 +  | 1 |
| GenelD:52633    | Nit2          | 16 | 57,156,665 | 57,167,332 | 10,667 -  | 1 |
| GenelD:10050363 | Gm16892       | 16 | 57,167,401 | 57,174,421 | 7,020 +   | 1 |
| GenelD:67581    | Tbc1d23       | 16 | 57,168,862 | 57,231,466 | 62,604 -  | 1 |
| GenelD:73379    | Dcbl2         | 16 | 58,408,535 | 58,469,745 | 61,210 +  | 1 |
| GenelD:54613    | St3gal6       | 16 | 58,470,541 | 58,523,312 | 52,771 -  | 1 |
| GenelD:12892    | Cpox          | 16 | 58,670,208 | 58,680,391 | 10,183 +  | 1 |
| GenelD:67609    | 4930453N24Rik | 16 | 64,766,105 | 64,770,939 | 4,834 -   | 1 |
| GenelD:72020    | Zfp654        | 16 | 64,780,347 | 64,786,321 | 5,974 -   | 1 |
| GenelD:10086191 | LOC100861916  | 16 | 64,786,675 | 64,851,652 | 64,977 -  | 2 |
| GenelD:106143   | Cggbp1        | 16 | 64,852,085 | 64,859,491 | 7,406 +   | 2 |
| GenelD:68942    | Chmp2b        | 16 | 65,539,133 | 65,562,697 | 23,564 -  | 1 |
| GenelD:73569    | Vgll3         | 16 | 65,815,633 | 65,863,066 | 47,433 +  | 1 |
| GenelD:74185    | Gbe1          | 16 | 70,314,087 | 70,569,716 | 255,629 + | 1 |
| GenelD:19876    | Robo1         | 16 | 72,663,149 | 73,046,100 | 382,951 + | 1 |
| GenelD:268903   | Nrip1         | 16 | 76,290,862 | 76,373,049 | 82,187 -  | 1 |
| GenelD:13052    | Cxadr         | 16 | 78,301,691 | 78,359,785 | 58,094 +  | 1 |
| GenelD:12228    | Btg3          | 16 | 78,359,860 | 78,376,785 | 16,925 -  | 1 |
| GenelD:67102    | D16Ertd472e   | 16 | 78,540,336 | 78,576,688 | 36,352 -  | 1 |
| GenelD:27393    | Mrpl39        | 16 | 84,717,580 | 84,735,302 | 17,722 -  | 1 |
| GenelD:67374    | Jam2          | 16 | 84,774,123 | 84,826,380 | 52,257 +  | 2 |
| GenelD:11957    | Atp5j         | 16 | 84,827,871 | 84,835,574 | 7,703 -   | 1 |
| GenelD:14390    | Gabpa         | 16 | 84,835,124 | 84,863,779 | 28,655 +  | 1 |
| GenelD:11820    | App           | 16 | 84,954,436 | 85,173,707 | 219,271 - | 1 |
| GenelD:11504    | Adamts1       | 16 | 85,793,827 | 85,803,115 | 9,288 -   | 1 |

|                 |               |    |            |            |           |   |
|-----------------|---------------|----|------------|------------|-----------|---|
| GenelD:23794    | Adamts5       | 16 | 85,858,157 | 85,901,125 | 42,968 -  | 2 |
| GenelD:74112    | Usp16         | 16 | 87,454,985 | 87,483,515 | 28,530 +  | 1 |
| GenelD:12469    | Cct8          | 16 | 87,483,325 | 87,495,869 | 12,544 -  | 1 |
| GenelD:414095   | B130034C11Rik | 16 | 87,496,073 | 87,504,038 | 7,965 +   | 1 |
| GenelD:12013    | Bach1         | 16 | 87,698,954 | 87,733,346 | 34,392 +  | 1 |
| GenelD:10003870 | Gm10789       | 16 | 90,142,237 | 90,146,827 | 4,590 +   | 1 |
| GenelD:20655    | Sod1          | 16 | 90,220,742 | 90,226,324 | 5,582 +   | 1 |
| GenelD:224432   | Scaf4         | 16 | 90,229,139 | 90,284,425 | 55,286 -  | 2 |
| GenelD:26559    | Hunk          | 16 | 90,386,397 | 90,499,553 | 113,156 + | 1 |
| GenelD:207932   | Urb1          | 16 | 90,751,527 | 90,810,413 | 58,886 -  | 1 |
| GenelD:68001    | 1110004E09Rik | 16 | 90,925,811 | 90,934,849 | 9,038 -   | 1 |
| GenelD:104015   | Synj1         | 16 | 90,936,097 | 91,011,308 | 75,211 -  | 2 |
| GenelD:67394    | 4930404I05Rik | 16 | 91,011,249 | 91,016,503 | 5,254 +   | 1 |
| GenelD:67367    | Paxbp1        | 16 | 91,014,037 | 91,044,379 | 30,342 -  | 1 |
| GenelD:50913    | Olig2         | 16 | 91,225,550 | 91,228,677 | 3,127 +   | 1 |
| GenelD:15976    | Ifnar2        | 16 | 91,372,783 | 91,405,587 | 32,804 +  | 2 |
| GenelD:16155    | Il10rb        | 16 | 91,406,235 | 91,425,834 | 19,599 +  | 1 |
| GenelD:15980    | Ifngr2        | 16 | 91,547,094 | 91,564,007 | 16,913 +  | 1 |
| GenelD:77975    | Tmem50b       | 16 | 91,574,508 | 91,597,680 | 23,172 -  | 1 |
| GenelD:14450    | Gart          | 16 | 91,621,395 | 91,646,972 | 25,577 -  | 1 |
| GenelD:20658    | Son           | 16 | 91,647,824 | 91,679,192 | 31,368 +  | 2 |
| GenelD:60364    | Donson        | 16 | 91,679,265 | 91,688,728 | 9,463 -   | 1 |
| GenelD:10003839 | Gm10785       | 16 | 91,688,898 | 91,715,755 | 26,857 +  | 1 |
| GenelD:66609    | Cryz1         | 16 | 91,689,322 | 91,728,802 | 39,480 -  | 1 |
| GenelD:53881    | Slc5a3        | 16 | 92,058,322 | 92,087,473 | 29,151 +  | 1 |
| GenelD:121022   | Mrps6         | 16 | 92,058,336 | 92,112,227 | 53,891 +  | 1 |
| GenelD:54720    | Rcan1         | 16 | 92,391,953 | 92,466,146 | 74,193 -  | 1 |
| GenelD:12394    | Runx1         | 16 | 92,601,466 | 92,826,066 | 224,600 - | 1 |
| GenelD:70028    | Dopey2        | 16 | 93,711,907 | 93,810,588 | 98,681 +  | 1 |
| GenelD:338467   | Morc3         | 16 | 93,832,121 | 93,876,073 | 43,952 +  | 2 |
| GenelD:110749   | Chaf1b        | 16 | 93,883,901 | 93,906,106 | 22,205 +  | 1 |
| GenelD:20465    | Sim2          | 16 | 94,085,260 | 94,127,032 | 41,772 +  | 1 |
| GenelD:56176    | Pigp          | 16 | 94,358,763 | 94,371,015 | 12,252 -  | 1 |
| GenelD:22129    | Ttc3          | 16 | 94,370,739 | 94,469,221 | 98,482 +  | 1 |
| GenelD:13548    | Dyrk1a        | 16 | 94,570,206 | 94,695,519 | 125,313 + | 2 |
| GenelD:23872    | Ets2          | 16 | 95,702,407 | 95,721,049 | 18,642 +  | 1 |
| GenelD:93871    | Brwd1         | 16 | 95,992,092 | 96,082,428 | 90,336 -  | 1 |
| GenelD:74296    | 1700093J21Rik | 16 | 96,082,676 | 96,089,070 | 6,394 +   | 1 |
| GenelD:15312    | Hmgn1         | 16 | 96,121,588 | 96,127,725 | 6,137 -   | 1 |
| GenelD:71446    | Wrb           | 16 | 96,145,419 | 96,157,852 | 12,433 +  | 1 |
| GenelD:385668   | Lca5l         | 16 | 96,158,406 | 96,192,257 | 33,851 -  | 2 |
| GenelD:50795    | Sh3bgr        | 16 | 96,200,470 | 96,228,933 | 28,463 +  | 1 |
| GenelD:56175    | Bace2         | 16 | 97,356,728 | 97,439,012 | 82,284 +  | 1 |
| GenelD:114604   | Prdm15        | 16 | 97,791,467 | 97,851,227 | 59,760 -  | 1 |
| GenelD:207781   | C2cd2         | 16 | 97,855,209 | 97,922,633 | 67,424 -  | 2 |
| GenelD:624086   | A230045G11Rik | 17 | 3,113,293  | 3,114,829  | 1,536 -   | 2 |
| GenelD:106583   | Scaf8         | 17 | 3,114,972  | 3,198,859  | 83,887 +  | 2 |

|                 |               |    |            |            |           |   |
|-----------------|---------------|----|------------|------------|-----------|---|
| GenelD:239985   | Arid1b        | 17 | 4,995,074  | 5,347,656  | 352,582 + | 1 |
| GenelD:10105571 | LOC101055715  | 17 | 5,490,232  | 5,493,226  | 2,994 -   | 1 |
| GenelD:224454   | Zdhhc14       | 17 | 5,492,600  | 5,753,891  | 261,291 + | 1 |
| GenelD:66616    | Snx9          | 17 | 5,841,380  | 5,930,711  | 89,331 +  | 1 |
| GenelD:20975    | Synj2         | 17 | 5,941,280  | 6,044,290  | 103,010 + | 1 |
| GenelD:321007   | Serac1        | 17 | 6,040,571  | 6,079,739  | 39,168 -  | 1 |
| GenelD:66467    | Gtf2h5        | 17 | 6,079,828  | 6,085,488  | 5,660 +   | 1 |
| GenelD:22350    | Ezr           | 17 | 6,738,131  | 6,782,780  | 44,649 -  | 1 |
| GenelD:55951    | Mpc1          | 17 | 8,283,813  | 8,297,661  | 13,848 +  | 1 |
| GenelD:75060    | 4930506C21Rik | 17 | 8,297,270  | 8,311,118  | 13,848 -  | 1 |
| GenelD:106489   | Sft2d1        | 17 | 8,311,103  | 8,327,442  | 16,339 +  | 1 |
| GenelD:320111   | Prr18         | 17 | 8,340,406  | 8,344,113  | 3,707 +   | 1 |
| GenelD:19317    | Qk            | 17 | 10,206,471 | 10,319,361 | 112,890 - | 1 |
| GenelD:10105570 | LOC101055707  | 17 | 10,319,370 | 10,321,142 | 1,772 -   | 1 |
| GenelD:10052679 | B930003M22Rik | 17 | 10,319,919 | 10,321,141 | 1,222 +   | 1 |
| GenelD:76634    | 1700110C19Rik | 17 | 10,324,602 | 10,329,312 | 4,710 +   | 1 |
| GenelD:16004    | Igf2r         | 17 | 12,682,406 | 12,769,706 | 87,300 -  | 1 |
| GenelD:104103   | Airn          | 17 | 12,741,311 | 12,859,884 | 118,573 + | 1 |
| GenelD:240023   | Pnlcd1        | 17 | 12,888,902 | 12,910,000 | 21,098 -  | 1 |
| GenelD:67681    | Mrpl18        | 17 | 12,911,355 | 12,916,091 | 4,736 -   | 1 |
| GenelD:21454    | Tcp1          | 17 | 12,916,465 | 12,925,067 | 8,602 +   | 1 |
| GenelD:10030374 | Snora20       | 17 | 12,922,857 | 12,922,917 | 60 +      | 1 |
| GenelD:224530   | Acat3         | 17 | 12,923,959 | 12,940,396 | 16,437 -  | 1 |
| GenelD:110460   | Acat2         | 17 | 12,943,042 | 12,960,725 | 17,683 -  | 1 |
| GenelD:10050268 | Gm15946       | 17 | 12,960,963 | 12,963,193 | 2,230 +   | 1 |
| GenelD:60532    | Wtap          | 17 | 12,966,799 | 12,992,539 | 25,740 -  | 3 |
| GenelD:20656    | Sod2          | 17 | 13,007,839 | 13,018,119 | 10,280 +  | 1 |
| GenelD:21646    | Tcte2         | 17 | 13,716,436 | 13,761,394 | 44,958 -  | 2 |
| GenelD:17356    | Mllt4         | 17 | 13,760,541 | 13,905,794 | 145,253 + | 2 |
| GenelD:64074    | Smoc2         | 17 | 14,279,506 | 14,404,790 | 125,284 + | 1 |
| GenelD:71682    | Wdr27         | 17 | 14,818,672 | 14,943,124 | 124,452 - | 1 |
| GenelD:67912    | 1600012H06Rik | 17 | 14,943,184 | 14,945,939 | 2,755 +   | 1 |
| GenelD:72057    | Phf10         | 17 | 14,944,994 | 14,961,260 | 16,266 -  | 1 |
| GenelD:106740   | LOC106740     | 17 | 14,947,736 | 14,948,823 | 1,087 -   | 1 |
| GenelD:13388    | Dll1          | 17 | 15,367,354 | 15,375,823 | 8,469 -   | 1 |
| GenelD:19170    | Psmb1         | 17 | 15,475,721 | 15,498,276 | 22,555 -  | 1 |
| GenelD:21374    | Tbp           | 17 | 15,499,888 | 15,517,427 | 17,539 +  | 2 |
| GenelD:18567    | Pdcd2         | 17 | 15,521,575 | 15,527,301 | 5,726 -   | 1 |
| GenelD:76030    | 5830433I10Rik | 17 | 15,704,434 | 15,705,263 | 829 -     | 1 |
| GenelD:12648    | Chd1          | 17 | 15,704,967 | 15,772,612 | 67,645 +  | 1 |
| GenelD:68799    | Rgmb          | 17 | 15,806,253 | 15,826,586 | 20,333 -  | 2 |
| GenelD:240028   | Lnpep         | 17 | 17,527,723 | 17,624,489 | 96,766 -  | 1 |
| GenelD:381070   | Casp16        | 17 | 23,551,073 | 23,555,981 | 4,908 -   | 1 |
| GenelD:449521   | Zfp213        | 17 | 23,556,767 | 23,564,226 | 7,459 -   | 1 |
| GenelD:320309   | 1520401A03Rik | 17 | 23,704,488 | 23,722,783 | 18,295 -  | 2 |
| GenelD:268930   | Pkmyt1        | 17 | 23,726,336 | 23,736,729 | 10,393 +  | 2 |
| GenelD:76498    | Paqr4         | 17 | 23,736,186 | 23,740,330 | 4,144 -   | 2 |

|                 |               |    |            |            |          |   |
|-----------------|---------------|----|------------|------------|----------|---|
| GenelD:73016    | Kremen2       | 17 | 23,741,199 | 23,745,829 | 4,630 -  | 1 |
| GenelD:638247   | 9530082P21Rik | 17 | 23,749,236 | 23,754,065 | 4,829 +  | 1 |
| GenelD:224613   | Flywch1       | 17 | 23,755,423 | 23,771,591 | 16,168 - | 1 |
| GenelD:76917    | Flywch2       | 17 | 23,776,918 | 23,786,077 | 9,159 -  | 1 |
| GenelD:75956    | Srrm2         | 17 | 23,803,187 | 23,824,741 | 21,554 + | 1 |
| GenelD:10062859 | Mir5125       | 17 | 23,823,291 | 23,823,369 | 78 +     | 1 |
| GenelD:67673    | Tceb2         | 17 | 23,824,740 | 23,829,109 | 4,369 -  | 1 |
| GenelD:353130   | Prss33        | 17 | 23,833,360 | 23,835,767 | 2,407 -  | 1 |
| GenelD:71003    | Prss41        | 17 | 23,836,785 | 23,844,156 | 7,371 -  | 1 |
| GenelD:69259    | Kctd5         | 17 | 24,047,720 | 24,073,485 | 25,765 - | 1 |
| GenelD:18607    | Pdpc1         | 17 | 24,073,680 | 24,141,594 | 67,914 - | 2 |
| GenelD:245847   | Amdhd2        | 17 | 24,155,833 | 24,163,733 | 7,900 -  | 1 |
| GenelD:11984    | Atp6v0c       | 17 | 24,163,866 | 24,169,429 | 5,563 -  | 1 |
| GenelD:224617   | Tbc1d24       | 17 | 24,175,431 | 24,205,562 | 30,131 - | 2 |
| GenelD:18209    | Ntn3          | 17 | 24,203,831 | 24,209,387 | 5,556 -  | 1 |
| GenelD:72016    | 1600002H07Rik | 17 | 24,215,054 | 24,220,769 | 5,715 -  | 1 |
| GenelD:12449    | Ccnf          | 17 | 24,223,232 | 24,251,409 | 28,177 - | 1 |
| GenelD:381072   | Abca17        | 17 | 24,264,279 | 24,347,252 | 82,973 - | 1 |
| GenelD:27410    | Abca3         | 17 | 24,352,046 | 24,410,201 | 58,155 + | 2 |
| GenelD:654822   | D330041H03Rik | 17 | 24,409,481 | 24,414,513 | 5,032 -  | 1 |
| GenelD:19826    | Rnps1         | 17 | 24,414,675 | 24,425,898 | 11,223 + | 1 |
| GenelD:67078    | Pgp           | 17 | 24,470,473 | 24,471,602 | 1,129 +  | 1 |
| GenelD:56716    | Mlst8         | 17 | 24,473,550 | 24,479,078 | 5,528 -  | 2 |
| GenelD:319259   | Bricd5        | 17 | 24,473,884 | 24,475,469 | 1,585 +  | 1 |
| GenelD:268932   | Caskin1       | 17 | 24,488,783 | 24,508,909 | 20,126 + | 1 |
| GenelD:18763    | Pkd1          | 17 | 24,549,950 | 24,596,514 | 46,564 + | 1 |
| GenelD:22084    | Tsc2          | 17 | 24,595,937 | 24,632,629 | 36,692 - | 1 |
| GenelD:18207    | Nthl1         | 17 | 24,632,682 | 24,638,838 | 6,156 +  | 1 |
| GenelD:65962    | Slc9a3r2      | 17 | 24,639,282 | 24,650,305 | 11,023 - | 2 |
| GenelD:381073   | Npw           | 17 | 24,657,330 | 24,658,425 | 1,095 -  | 1 |
| GenelD:213753   | Zfp598        | 17 | 24,669,752 | 24,682,016 | 12,264 + | 1 |
| GenelD:20974    | Syng3         | 17 | 24,685,092 | 24,689,949 | 4,857 -  | 1 |
| GenelD:11692    | Gfer          | 17 | 24,693,191 | 24,696,156 | 2,965 -  | 1 |
| GenelD:71893    | Noxo1         | 17 | 24,696,234 | 24,700,530 | 4,296 +  | 1 |
| GenelD:213773   | Tbl3          | 17 | 24,700,653 | 24,707,653 | 7,000 -  | 1 |
| GenelD:67504    | Rnf151        | 17 | 24,715,839 | 24,718,057 | 2,218 -  | 1 |
| GenelD:73474    | Snhg9         | 17 | 24,719,531 | 24,719,965 | 434 -    | 1 |
| GenelD:10030695 | Snora78       | 17 | 24,719,676 | 24,719,832 | 156 -    | 1 |
| GenelD:16898    | Rps2          | 17 | 24,720,063 | 24,721,927 | 1,864 +  | 1 |
| GenelD:104366   | Snora64       | 17 | 24,720,789 | 24,720,905 | 116 +    | 1 |
| GenelD:68342    | Ndufb10       | 17 | 24,722,067 | 24,724,388 | 2,321 -  | 1 |
| GenelD:66211    | Rpl3l         | 17 | 24,727,829 | 24,736,149 | 8,320 +  | 1 |
| GenelD:16005    | Igfals        | 17 | 24,878,770 | 24,882,008 | 3,238 +  | 1 |
| GenelD:26426    | Nubp2         | 17 | 24,882,611 | 24,886,350 | 3,739 -  | 2 |
| GenelD:79043    | Spsb3         | 17 | 24,886,674 | 24,892,147 | 5,473 +  | 2 |
| GenelD:193838   | Eme2          | 17 | 24,892,152 | 24,895,087 | 2,935 -  | 2 |
| GenelD:79044    | Mrps34        | 17 | 24,895,120 | 24,896,274 | 1,154 +  | 2 |

|                 |               |    |            |            |          |   |
|-----------------|---------------|----|------------|------------|----------|---|
| GenelD:79059    | Nme3          | 17 | 24,896,500 | 24,897,531 | 1,031 +  | 2 |
| GenelD:30957    | Mapk8ip3      | 17 | 24,897,506 | 24,936,977 | 39,471 - | 1 |
| GenelD:52009    | Hn1l          | 17 | 24,942,470 | 24,960,623 | 18,153 - | 1 |
| GenelD:57354    | Cramp1l       | 17 | 24,961,226 | 25,015,230 | 54,004 - | 3 |
| GenelD:106633   | Ift140        | 17 | 25,016,086 | 25,099,499 | 83,413 + | 2 |
| GenelD:68509    | Ptx4          | 17 | 25,120,760 | 25,125,268 | 4,508 +  | 1 |
| GenelD:26373    | Clcn7         | 17 | 25,133,394 | 25,162,099 | 28,705 + | 1 |
| GenelD:214489   | BC003965      | 17 | 25,184,561 | 25,187,662 | 3,101 +  | 1 |
| GenelD:74154    | Unkl          | 17 | 25,188,400 | 25,234,442 | 46,042 + | 2 |
| GenelD:214505   | Gnptg         | 17 | 25,234,317 | 25,240,116 | 5,799 -  | 1 |
| GenelD:68327    | Tsr3          | 17 | 25,240,170 | 25,242,799 | 2,629 +  | 1 |
| GenelD:545192   | Baiap3        | 17 | 25,242,659 | 25,256,364 | 13,705 - | 1 |
| GenelD:22196    | Ube2i         | 17 | 25,260,511 | 25,274,310 | 13,799 - | 1 |
| GenelD:10027222 | Gm17801       | 17 | 25,274,124 | 25,275,528 | 1,404 +  | 1 |
| GenelD:58226    | Cacna1h       | 17 | 25,374,287 | 25,433,783 | 59,496 - | 1 |
| GenelD:20681    | Sox8          | 17 | 25,565,893 | 25,570,686 | 4,793 -  | 1 |
| GenelD:72834    | 2810468N07Rik | 17 | 25,570,811 | 25,575,043 | 4,232 +  | 1 |
| GenelD:76483    | Lmf1          | 17 | 25,579,174 | 25,662,826 | 83,652 + | 1 |
| GenelD:214931   | Fbxl16        | 17 | 25,809,085 | 25,821,265 | 12,180 + | 3 |
| GenelD:268933   | Wdr24         | 17 | 25,823,627 | 25,828,730 | 5,103 +  | 3 |
| GenelD:72106    | Jmjd8         | 17 | 25,829,043 | 25,831,843 | 2,800 +  | 4 |
| GenelD:56424    | Stub1         | 17 | 25,830,636 | 25,833,361 | 2,725 -  | 4 |
| GenelD:214951   | Rhbdl1        | 17 | 25,834,465 | 25,837,127 | 2,662 -  | 5 |
| GenelD:214952   | Rhot2         | 17 | 25,838,838 | 25,844,851 | 6,013 -  | 5 |
| GenelD:106618   | Wdr90         | 17 | 25,844,734 | 25,861,515 | 16,781 - | 5 |
| GenelD:68241    | Fam195a       | 17 | 25,863,698 | 25,868,738 | 5,040 -  | 3 |
| GenelD:68347    | 0610011F06Rik | 17 | 25,875,500 | 25,877,163 | 1,663 +  | 2 |
| GenelD:215001   | Wfikkn1       | 17 | 25,877,628 | 25,880,858 | 3,230 -  | 2 |
| GenelD:224624   | Rab40c        | 17 | 25,882,114 | 25,919,714 | 37,600 - | 2 |
| GenelD:14755    | Pigq          | 17 | 25,926,424 | 25,941,962 | 15,538 - | 1 |
| GenelD:69431    | 1700022N22Rik | 17 | 25,985,815 | 25,988,572 | 2,757 +  | 1 |
| GenelD:215445   | Rab11fip3     | 17 | 25,989,036 | 26,069,177 | 80,141 - | 2 |
| GenelD:26378    | Decr2         | 17 | 26,081,211 | 26,090,164 | 8,953 -  | 1 |
| GenelD:56520    | Nme4          | 17 | 26,091,745 | 26,095,470 | 3,725 -  | 1 |
| GenelD:666609   | Gm8186        | 17 | 26,098,872 | 26,099,257 | 385 -    | 1 |
| GenelD:106581   | Iftg3         | 17 | 26,212,692 | 26,244,242 | 31,550 - | 2 |
| GenelD:66978    | Luc7l         | 17 | 26,252,910 | 26,285,506 | 32,596 + | 2 |
| GenelD:240055   | Neurl1b       | 17 | 26,414,965 | 26,446,349 | 31,384 + | 2 |
| GenelD:19252    | Dusp1         | 17 | 26,505,591 | 26,508,472 | 2,881 -  | 1 |
| GenelD:67458    | Ergic1        | 17 | 26,561,512 | 26,656,934 | 95,422 + | 1 |
| GenelD:11974    | Atp6v0e       | 17 | 26,676,396 | 26,699,647 | 23,251 + | 1 |
| GenelD:77128    | Crebrf        | 17 | 26,715,650 | 26,776,628 | 60,978 + | 1 |
| GenelD:18091    | Nkx2-5        | 17 | 26,838,665 | 26,841,565 | 2,900 -  | 1 |
| GenelD:16580    | Kifc5b        | 17 | 26,917,091 | 26,932,579 | 15,488 + | 1 |
| GenelD:21652    | Phf1          | 17 | 26,933,127 | 26,937,890 | 4,763 +  | 1 |
| GenelD:67675    | Cuta          | 17 | 26,937,972 | 26,939,478 | 1,506 -  | 1 |
| GenelD:240057   | Syngap1       | 17 | 26,941,452 | 26,970,645 | 29,193 + | 2 |

|                 |               |    |            |            |           |   |
|-----------------|---------------|----|------------|------------|-----------|---|
| GenelD:474156   | Zbtb9         | 17 | 26,973,179 | 26,976,203 | 3,024 +   | 1 |
| GenelD:268934   | Grm4          | 17 | 27,422,387 | 27,503,304 | 80,917 -  | 1 |
| GenelD:15361    | Hmga1         | 17 | 27,556,574 | 27,563,672 | 7,098 +   | 3 |
| GenelD:106672   | Al413582      | 17 | 27,563,769 | 27,565,727 | 1,958 -   | 3 |
| GenelD:56409    | Nudt3         | 17 | 27,579,391 | 27,623,452 | 44,061 -  | 1 |
| GenelD:67097    | Rps10         | 17 | 27,630,429 | 27,635,242 | 4,813 -   | 2 |
| GenelD:224647   | D17Wsu92e     | 17 | 27,751,235 | 27,820,542 | 69,307 -  | 1 |
| GenelD:20630    | Snrpc         | 17 | 27,840,087 | 27,851,968 | 11,881 +  | 1 |
| GenelD:224648   | Uhrf1bp1      | 17 | 27,856,507 | 27,900,040 | 43,533 +  | 2 |
| GenelD:68776    | Taf11         | 17 | 27,901,128 | 27,907,724 | 6,596 -   | 1 |
| GenelD:224650   | Anks1         | 17 | 27,909,340 | 28,062,637 | 153,297 + | 1 |
| GenelD:268935   | Scube3        | 17 | 28,142,526 | 28,171,345 | 28,819 +  | 1 |
| GenelD:10050418 | C230013L11Rik | 17 | 28,174,178 | 28,177,105 | 2,927 -   | 1 |
| GenelD:224656   | Zfp523        | 17 | 28,177,418 | 28,205,886 | 28,468 +  | 1 |
| GenelD:72775    | Fance         | 17 | 28,313,530 | 28,326,574 | 13,044 +  | 2 |
| GenelD:19896    | Rpl10a        | 17 | 28,328,471 | 28,331,033 | 2,562 +   | 2 |
| GenelD:21678    | Tead3         | 17 | 28,331,671 | 28,350,805 | 19,134 -  | 4 |
| GenelD:22157    | Tulp1         | 17 | 28,351,519 | 28,365,143 | 13,624 -  | 2 |
| GenelD:14229    | Fkbp5         | 17 | 28,399,095 | 28,486,112 | 87,017 -  | 1 |
| GenelD:10086228 | LOC100862287  | 17 | 28,497,335 | 28,517,524 | 20,189 -  | 1 |
| GenelD:320187   | E230001N04Rik | 17 | 28,523,281 | 28,525,370 | 2,089 +   | 1 |
| GenelD:67645    | Armc12        | 17 | 28,530,861 | 28,538,975 | 8,114 +   | 1 |
| GenelD:20815    | Srpk1         | 17 | 28,589,592 | 28,622,454 | 32,862 -  | 1 |
| GenelD:224661   | Slc26a8       | 17 | 28,636,992 | 28,689,987 | 52,995 -  | 1 |
| GenelD:26416    | Mapk14        | 17 | 28,691,342 | 28,748,405 | 57,063 +  | 1 |
| GenelD:268936   | Brpf3         | 17 | 28,801,126 | 28,838,789 | 37,663 +  | 2 |
| GenelD:69307    | Pxt1          | 17 | 28,933,986 | 28,942,262 | 8,276 -   | 1 |
| GenelD:66989    | Kctd20        | 17 | 28,953,216 | 28,967,937 | 14,721 +  | 1 |
| GenelD:106504   | Stk38         | 17 | 28,970,885 | 29,007,937 | 37,052 -  | 1 |
| GenelD:20383    | Srsf3         | 17 | 29,032,660 | 29,043,372 | 10,712 +  | 1 |
| GenelD:12575    | Cdkn1a        | 17 | 29,090,986 | 29,100,722 | 9,736 +   | 1 |
| GenelD:240058   | Cpne5         | 17 | 29,156,521 | 29,237,790 | 81,269 -  | 1 |
| GenelD:68816    | Ppil1         | 17 | 29,250,835 | 29,263,971 | 13,136 -  | 1 |
| GenelD:80748    | BC004004      | 17 | 29,268,788 | 29,302,887 | 34,099 +  | 1 |
| GenelD:18712    | Pim1          | 17 | 29,491,045 | 29,495,465 | 4,420 +   | 1 |
| GenelD:71138    | Tmem217       | 17 | 29,526,009 | 29,549,593 | 23,584 -  | 1 |
| GenelD:381085   | Tbc1d22b      | 17 | 29,549,802 | 29,606,808 | 57,006 +  | 2 |
| GenelD:58230    | Rnf8          | 17 | 29,614,831 | 29,641,659 | 26,828 +  | 1 |
| GenelD:10050430 | Gm20161       | 17 | 29,652,231 | 29,658,313 | 6,082 -   | 1 |
| GenelD:74157    | Ftsjd2        | 17 | 29,660,601 | 29,703,359 | 42,758 +  | 1 |
| GenelD:74762    | Mdga1         | 17 | 29,827,958 | 29,887,882 | 59,924 -  | 1 |
| GenelD:21769    | Zfand3        | 17 | 30,005,087 | 30,210,020 | 204,933 + | 1 |
| GenelD:224674   | Slc37a1       | 17 | 31,295,483 | 31,350,709 | 55,226 +  | 1 |
| GenelD:18585    | Pde9a         | 17 | 31,386,234 | 31,476,309 | 90,075 +  | 1 |
| GenelD:57773    | Wdr4          | 17 | 31,494,322 | 31,512,487 | 18,165 -  | 1 |
| GenelD:78330    | Ndufv3        | 17 | 31,520,115 | 31,531,326 | 11,211 +  | 1 |
| GenelD:18771    | Pknnox1       | 17 | 31,564,773 | 31,607,693 | 42,920 +  | 1 |

|                 |          |    |            |            |          |   |
|-----------------|----------|----|------------|------------|----------|---|
| GenelD:12411    | Cbs      | 17 | 31,612,644 | 31,637,141 | 24,497 - | 1 |
| GenelD:108121   | U2af1    | 17 | 31,647,082 | 31,658,754 | 11,672 - | 1 |
| GenelD:17691    | Sik1     | 17 | 31,844,250 | 31,855,792 | 11,542 - | 1 |
| GenelD:74377    | Hsf2bp   | 17 | 31,944,769 | 32,034,508 | 89,739 - | 1 |
| GenelD:72462    | Rrp1b    | 17 | 32,036,162 | 32,062,862 | 26,700 + | 1 |
| GenelD:18131    | Notch3   | 17 | 32,120,893 | 32,166,852 | 45,959 - | 1 |
| GenelD:71932    | Ephx3    | 17 | 32,183,770 | 32,189,463 | 5,693 -  | 1 |
| GenelD:57261    | Brd4     | 17 | 32,196,274 | 32,284,123 | 87,849 - | 2 |
| GenelD:56399    | Akap8    | 17 | 32,303,676 | 32,321,153 | 17,477 - | 1 |
| GenelD:54194    | Akap8l   | 17 | 32,321,424 | 32,350,577 | 29,153 - | 1 |
| GenelD:320997   | Cyp4f39  | 17 | 32,452,723 | 32,493,320 | 40,597 + | 1 |
| GenelD:240064   | Zfp799   | 17 | 32,817,204 | 32,830,248 | 13,044 - | 1 |
| GenelD:224691   | Zfp472   | 17 | 32,965,831 | 32,979,211 | 13,380 + | 1 |
| GenelD:22643    | Zfp101   | 17 | 33,380,179 | 33,394,637 | 14,458 - | 1 |
| GenelD:76936    | Hnrnpm   | 17 | 33,646,233 | 33,685,458 | 39,225 - | 1 |
| GenelD:224703   | March2   | 17 | 33,685,692 | 33,718,677 | 32,985 - | 2 |
| GenelD:57875    | Angptl4  | 17 | 33,774,900 | 33,781,575 | 6,675 -  | 1 |
| GenelD:80880    | Kank3    | 17 | 33,810,523 | 33,822,914 | 12,391 + | 1 |
| GenelD:54127    | Rps28    | 17 | 33,823,036 | 33,824,498 | 1,462 -  | 1 |
| GenelD:66416    | Ndufa7   | 17 | 33,824,614 | 33,838,313 | 13,699 + | 1 |
| GenelD:10050276 | Kifc1    | 17 | 33,875,666 | 33,890,633 | 14,967 - | 1 |
| GenelD:474160   | BC033916 | 17 | 33,905,135 | 33,906,675 | 1,540 +  | 1 |
| GenelD:407803   | BC051226 | 17 | 33,908,182 | 33,909,178 | 996 -    | 2 |
| GenelD:13163    | Daxx     | 17 | 33,909,445 | 33,915,590 | 6,145 +  | 3 |
| GenelD:81630    | Zbtb22   | 17 | 33,916,176 | 33,919,325 | 3,149 +  | 4 |
| GenelD:10050284 | Gm19412  | 17 | 33,919,279 | 33,920,485 | 1,206 -  | 4 |
| GenelD:21356    | Tapbp    | 17 | 33,919,478 | 33,929,290 | 9,812 +  | 5 |
| GenelD:19732    | Rgl2     | 17 | 33,929,894 | 33,937,687 | 7,793 +  | 4 |
| GenelD:14976    | H2-Ke2   | 17 | 33,938,909 | 33,940,343 | 1,434 -  | 3 |
| GenelD:57315    | Wdr46    | 17 | 33,940,723 | 33,949,695 | 8,972 +  | 3 |
| GenelD:54218    | B3galt4  | 17 | 33,949,912 | 33,951,488 | 1,576 -  | 2 |
| GenelD:20084    | Rps18    | 17 | 33,951,999 | 33,955,641 | 3,642 -  | 1 |
| GenelD:224705   | Vps52    | 17 | 33,955,882 | 33,966,488 | 10,606 + | 1 |
| GenelD:14972    | H2-K1    | 17 | 33,996,012 | 34,000,333 | 4,321 -  | 1 |
| GenelD:19763    | Ring1    | 17 | 34,020,792 | 34,024,680 | 3,888 -  | 3 |
| GenelD:723823   | Mir219-1 | 17 | 34,024,983 | 34,025,092 | 109 -    | 3 |
| GenelD:14979    | H2-Ke6   | 17 | 34,026,033 | 34,028,055 | 2,022 -  | 3 |
| GenelD:14977    | Slc39a7  | 17 | 34,028,266 | 34,031,690 | 3,424 -  | 3 |
| GenelD:20182    | Rxb      | 17 | 34,031,812 | 34,038,403 | 6,591 +  | 3 |
| GenelD:12815    | Col11a2  | 17 | 34,039,437 | 34,066,242 | 26,805 + | 1 |
| GenelD:10050291 | Gm19450  | 17 | 34,099,929 | 34,109,826 | 9,897 +  | 1 |
| GenelD:14312    | Brd2     | 17 | 34,112,019 | 34,122,607 | 10,588 - | 1 |
| GenelD:18132    | Notch4   | 17 | 34,564,295 | 34,588,543 | 24,248 + | 1 |
| GenelD:106512   | Gpsm3    | 17 | 34,589,806 | 34,591,754 | 1,948 +  | 1 |
| GenelD:18515    | Pbx2     | 17 | 34,592,471 | 34,597,341 | 4,870 +  | 1 |
| GenelD:11596    | Ager     | 17 | 34,597,862 | 34,600,932 | 3,070 +  | 1 |
| GenelD:54397    | Ppt2     | 17 | 34,616,662 | 34,627,097 | 10,435 - | 1 |



|                 |               |    |            |            |          |   |
|-----------------|---------------|----|------------|------------|----------|---|
| GenelD:260297   | Prprt1        | 17 | 34,629,686 | 34,632,260 | 2,574 +  | 1 |
| GenelD:81877    | Tnxb          | 17 | 34,670,535 | 34,719,815 | 49,280 + | 1 |
| GenelD:54402    | Stk19         | 17 | 34,823,993 | 34,836,903 | 12,910 - | 1 |
| GenelD:112403   | Dom3z         | 17 | 34,837,019 | 34,839,186 | 2,167 +  | 1 |
| GenelD:108077   | Skiv2l        | 17 | 34,839,226 | 34,850,204 | 10,978 - | 2 |
| GenelD:27632    | Nelfe         | 17 | 34,850,391 | 34,856,372 | 5,981 +  | 1 |
| GenelD:14962    | Cfb           | 17 | 34,856,374 | 34,862,514 | 6,140 -  | 1 |
| GenelD:193736   | Zbtb12        | 17 | 34,894,559 | 34,896,844 | 2,285 +  | 2 |
| GenelD:110147   | Ehmt2         | 17 | 34,898,499 | 34,914,047 | 15,548 + | 2 |
| GenelD:68763    | 1110038B12Rik | 17 | 34,950,235 | 34,952,471 | 2,236 -  | 1 |
| GenelD:10021742 | Snord52       | 17 | 34,950,950 | 34,951,008 | 58 -     | 1 |
| GenelD:15511    | Hspa1b        | 17 | 34,956,429 | 34,959,238 | 2,809 -  | 1 |
| GenelD:193740   | Hspa1a        | 17 | 34,969,359 | 34,972,156 | 2,797 -  | 1 |
| GenelD:15482    | Hspa1l        | 17 | 34,972,703 | 34,979,228 | 6,525 +  | 1 |
| GenelD:10105581 | LOC101055816  | 17 | 34,976,899 | 34,981,788 | 4,889 -  | 1 |
| GenelD:27756    | Lsm2          | 17 | 34,981,854 | 34,985,891 | 4,037 +  | 1 |
| GenelD:22321    | Vars          | 17 | 35,000,907 | 35,016,329 | 15,422 + | 1 |
| GenelD:114652   | Ly6g5c        | 17 | 35,108,300 | 35,111,953 | 3,653 +  | 1 |
| GenelD:266614   | Ly6g5b        | 17 | 35,113,944 | 35,115,400 | 1,456 -  | 1 |
| GenelD:13001    | Csnk2b        | 17 | 35,116,195 | 35,121,447 | 5,252 -  | 2 |
| GenelD:81845    | Gpank1        | 17 | 35,121,496 | 35,124,815 | 3,319 +  | 2 |
| GenelD:114585   | D17H6S53E     | 17 | 35,126,402 | 35,128,855 | 2,453 +  | 3 |
| GenelD:55938    | Apom          | 17 | 35,128,997 | 35,131,752 | 2,755 -  | 3 |
| GenelD:224727   | Bag6          | 17 | 35,135,178 | 35,147,322 | 12,144 + | 3 |
| GenelD:53761    | Prrc2a        | 17 | 35,149,076 | 35,164,877 | 15,801 - | 3 |
| GenelD:11629    | Aif1          | 17 | 35,170,992 | 35,176,001 | 5,009 -  | 2 |
| GenelD:16988    | Lst1          | 17 | 35,185,095 | 35,188,440 | 3,345 -  | 1 |
| GenelD:16994    | Ltb           | 17 | 35,194,507 | 35,196,305 | 1,798 +  | 1 |
| GenelD:21926    | Tnf           | 17 | 35,199,390 | 35,201,996 | 2,606 -  | 1 |
| GenelD:16992    | Lta           | 17 | 35,203,165 | 35,205,351 | 2,186 -  | 1 |
| GenelD:18038    | Nfkbil1       | 17 | 35,220,175 | 35,235,815 | 15,640 - | 2 |
| GenelD:66237    | Atp6v1g2      | 17 | 35,236,596 | 35,238,767 | 2,171 +  | 2 |
| GenelD:53817    | Ddx39b        | 17 | 35,241,746 | 35,253,707 | 11,961 + | 3 |
| GenelD:14964    | H2-D1         | 17 | 35,263,094 | 35,267,497 | 4,403 +  | 1 |
| GenelD:110557   | H2-Q6         | 17 | 35,424,877 | 35,428,361 | 3,484 +  | 1 |
| GenelD:68915    | Vars2         | 17 | 35,655,634 | 35,667,592 | 11,958 - | 1 |
| GenelD:14885    | Gtf2h4        | 17 | 35,667,739 | 35,673,682 | 5,943 -  | 1 |
| GenelD:12305    | Ddr1          | 17 | 35,681,567 | 35,704,139 | 22,572 - | 1 |
| GenelD:14251    | Flot1         | 17 | 35,823,357 | 35,832,787 | 9,430 +  | 2 |
| GenelD:22154    | Tubb5         | 17 | 35,833,920 | 35,838,301 | 4,381 -  | 2 |
| GenelD:240087   | Mdc1          | 17 | 35,841,498 | 35,859,670 | 18,172 + | 3 |
| GenelD:10050335 | 5530401N12Rik | 17 | 35,859,653 | 35,866,886 | 7,233 -  | 1 |
| GenelD:106582   | Nrm           | 17 | 35,861,318 | 35,865,400 | 4,082 +  | 1 |
| GenelD:76448    | Ppp1r18       | 17 | 35,865,595 | 35,875,596 | 10,001 + | 2 |
| GenelD:69192    | Dhx16         | 17 | 35,879,778 | 35,892,670 | 12,892 + | 2 |
| GenelD:69662    | 2310061I04Rik | 17 | 35,892,677 | 35,897,378 | 4,701 -  | 1 |
| GenelD:73242    | Atat1         | 17 | 35,897,595 | 35,910,068 | 12,473 - | 1 |

|                 |               |    |            |            |           |   |
|-----------------|---------------|----|------------|------------|-----------|---|
| GenelD:224742   | Abcf1         | 17 | 35,956,819 | 35,969,750 | 12,931 -  | 2 |
| GenelD:10012445 | Mir877        | 17 | 35,960,730 | 35,960,814 | 84 -      | 1 |
| GenelD:75210    | Prr3          | 17 | 35,972,539 | 35,979,825 | 7,286 -   | 2 |
| GenelD:14670    | Gnl1          | 17 | 35,979,955 | 35,989,462 | 9,507 +   | 2 |
| GenelD:79263    | Trim39        | 17 | 36,258,873 | 36,272,004 | 13,131 -  | 1 |
| GenelD:54393    | Gabbr1        | 17 | 37,045,966 | 37,074,305 | 28,339 +  | 1 |
| GenelD:12488    | Cd2ap         | 17 | 42,792,951 | 42,876,424 | 83,473 -  | 1 |
| GenelD:94185    | Tnfrsf21      | 17 | 43,016,555 | 43,089,188 | 72,633 +  | 1 |
| GenelD:210510   | Tdrd6         | 17 | 43,615,335 | 43,630,299 | 14,964 -  | 1 |
| GenelD:74011    | Slc25a27      | 17 | 43,641,900 | 43,667,015 | 25,115 -  | 1 |
| GenelD:56050    | Cyp39a1       | 17 | 43,667,425 | 43,751,431 | 84,006 +  | 1 |
| GenelD:12393    | Runx2         | 17 | 44,604,001 | 44,814,797 | 210,796 - | 2 |
| GenelD:109115   | Supt3         | 17 | 44,777,171 | 45,119,284 | 342,113 + | 1 |
| GenelD:71702    | Cdc5l         | 17 | 45,391,887 | 45,433,707 | 41,820 -  | 1 |
| GenelD:21645    | Tcte1         | 17 | 45,523,434 | 45,542,679 | 19,245 +  | 1 |
| GenelD:210573   | Tmem151b      | 17 | 45,541,940 | 45,549,677 | 7,737 -   | 1 |
| GenelD:18037    | Nfkbie        | 17 | 45,555,716 | 45,563,169 | 7,453 +   | 3 |
| GenelD:73836    | Slc35b2       | 17 | 45,564,152 | 45,567,669 | 3,517 +   | 2 |
| GenelD:15516    | Hsp90ab1      | 17 | 45,567,778 | 45,573,261 | 5,483 -   | 2 |
| GenelD:63959    | Slc29a1       | 17 | 45,585,200 | 45,599,603 | 14,403 -  | 1 |
| GenelD:653016   | Gm7325        | 17 | 45,600,967 | 45,602,102 | 1,135 -   | 1 |
| GenelD:224807   | Tmem63b       | 17 | 45,660,177 | 45,686,218 | 26,041 -  | 1 |
| GenelD:10003860 | E030047D23Rik | 17 | 45,682,592 | 45,685,646 | 3,054 -   | 1 |
| GenelD:68463    | Mrpl14        | 17 | 45,686,372 | 45,698,495 | 12,123 +  | 1 |
| GenelD:22339    | Vegfa         | 17 | 46,016,993 | 46,032,377 | 15,384 -  | 1 |
| GenelD:80905    | Polh          | 17 | 46,171,993 | 46,202,625 | 30,632 -  | 1 |
| GenelD:72322    | Xpo5          | 17 | 46,202,855 | 46,242,299 | 39,444 +  | 2 |
| GenelD:20016    | Polr1c        | 17 | 46,243,920 | 46,248,045 | 4,125 -   | 2 |
| GenelD:28064    | Yipf3         | 17 | 46,248,080 | 46,252,537 | 4,457 +   | 2 |
| GenelD:224813   | Lrrc73        | 17 | 46,254,165 | 46,257,316 | 3,151 +   | 2 |
| GenelD:74094    | Tjap1         | 17 | 46,257,851 | 46,283,026 | 25,175 -  | 2 |
| GenelD:106565   | Dlk2          | 17 | 46,297,421 | 46,303,271 | 5,850 +   | 1 |
| GenelD:224814   | Abcc10        | 17 | 46,303,230 | 46,328,023 | 24,793 -  | 1 |
| GenelD:78309    | Cul9          | 17 | 46,500,609 | 46,546,388 | 45,779 -  | 2 |
| GenelD:20807    | Srf           | 17 | 46,546,839 | 46,556,162 | 9,323 -   | 2 |
| GenelD:71461    | Ptk7          | 17 | 46,564,451 | 46,629,504 | 65,053 -  | 2 |
| GenelD:74764    | Klc4          | 17 | 46,630,631 | 46,645,144 | 14,513 -  | 3 |
| GenelD:27398    | Mrpl2         | 17 | 46,646,248 | 46,650,132 | 3,884 +   | 2 |
| GenelD:66515    | Cul7          | 17 | 46,650,338 | 46,664,364 | 14,026 +  | 2 |
| GenelD:21770    | Ppp2r5d       | 17 | 46,682,991 | 46,705,002 | 22,011 -  | 1 |
| GenelD:224824   | Pex6          | 17 | 46,711,463 | 46,725,541 | 14,078 +  | 1 |
| GenelD:19208    | Ptcra         | 17 | 46,755,663 | 46,763,712 | 8,049 -   | 1 |
| GenelD:67101    | 2310039H08Rik | 17 | 46,772,635 | 46,773,407 | 772 +     | 1 |
| GenelD:66229    | Rpl7l1        | 17 | 46,773,907 | 46,782,656 | 8,749 -   | 1 |
| GenelD:442840   | A330017A19Rik | 17 | 46,888,999 | 46,890,399 | 1,400 -   | 2 |
| GenelD:72726    | Tbcc          | 17 | 46,890,621 | 46,892,463 | 1,842 +   | 2 |
| GenelD:224826   | Ubr2          | 17 | 46,928,291 | 47,010,532 | 82,241 -  | 1 |

|                 |               |    |            |            |           |   |
|-----------------|---------------|----|------------|------------|-----------|---|
| GenelD:224829   | Trerf1        | 17 | 47,140,942 | 47,359,458 | 218,516 + | 1 |
| GenelD:12445    | Ccnd3         | 17 | 47,505,051 | 47,599,689 | 94,638 +  | 1 |
| GenelD:53414    | Bysl          | 17 | 47,599,331 | 47,611,492 | 12,161 -  | 2 |
| GenelD:56771    | Med20         | 17 | 47,611,596 | 47,624,418 | 12,822 +  | 1 |
| GenelD:224836   | Usp49         | 17 | 47,630,690 | 47,684,067 | 53,377 +  | 2 |
| GenelD:66119    | Tomm6         | 17 | 47,686,645 | 47,688,386 | 1,741 -   | 1 |
| GenelD:10041578 | Gm14872       | 17 | 47,687,610 | 47,691,092 | 3,482 +   | 1 |
| GenelD:381104   | Prickle4      | 17 | 47,688,468 | 47,695,658 | 7,190 -   | 1 |
| GenelD:107971   | Frs3          | 17 | 47,695,207 | 47,704,286 | 9,079 +   | 1 |
| GenelD:109820   | Pgc           | 17 | 47,726,842 | 47,734,478 | 7,636 +   | 2 |
| GenelD:21425    | Tfeb          | 17 | 47,737,037 | 47,792,416 | 55,379 +  | 2 |
| GenelD:17240    | Mdfi          | 17 | 47,815,332 | 47,834,691 | 19,359 -  | 1 |
| GenelD:74123    | Foxp4         | 17 | 47,867,133 | 47,924,632 | 57,499 -  | 2 |
| GenelD:18044    | Nfya          | 17 | 48,386,885 | 48,409,820 | 22,935 -  | 1 |
| GenelD:106821   | Oard1         | 17 | 48,410,080 | 48,417,266 | 7,186 +   | 1 |
| GenelD:11811    | Apobec2       | 17 | 48,419,231 | 48,432,728 | 13,497 -  | 1 |
| GenelD:76438    | Rftn1         | 17 | 49,993,307 | 50,190,497 | 197,190 - | 1 |
| GenelD:13164    | Dazl          | 17 | 50,279,394 | 50,293,599 | 14,205 -  | 1 |
| GenelD:224860   | Plcl2         | 17 | 50,509,547 | 50,688,494 | 178,947 + | 2 |
| GenelD:72238    | Tbc1d5        | 17 | 50,733,127 | 51,179,349 | 446,222 - | 1 |
| GenelD:271457   | Rab5a         | 17 | 53,479,234 | 53,507,678 | 28,444 +  | 1 |
| GenelD:18519    | Kat2b         | 17 | 53,566,971 | 53,672,721 | 105,750 + | 1 |
| GenelD:106766   | Stap2         | 17 | 55,997,077 | 56,005,568 | 8,491 -   | 1 |
| GenelD:68047    | Mpnd          | 17 | 56,009,201 | 56,016,790 | 7,589 +   | 1 |
| GenelD:20405    | Sh3gl1        | 17 | 56,016,750 | 56,036,637 | 19,887 -  | 3 |
| GenelD:27221    | Chaf1a        | 17 | 56,040,416 | 56,068,026 | 27,610 +  | 2 |
| GenelD:66530    | Ubxn6         | 17 | 56,068,253 | 56,074,989 | 6,736 -   | 1 |
| GenelD:15193    | Hdgrfp2       | 17 | 56,079,657 | 56,100,596 | 20,939 +  | 1 |
| GenelD:66968    | Plin5         | 17 | 56,111,601 | 56,117,548 | 5,947 -   | 1 |
| GenelD:76905    | Lrg1          | 17 | 56,119,678 | 56,121,946 | 2,268 -   | 1 |
| GenelD:20359    | Sema6b        | 17 | 56,123,085 | 56,140,343 | 17,258 -  | 1 |
| GenelD:14154    | Fem1a         | 17 | 56,256,793 | 56,263,608 | 6,815 +   | 1 |
| GenelD:76920    | Arrdc5        | 17 | 56,294,111 | 56,300,286 | 6,175 -   | 1 |
| GenelD:18140    | Uhrf1         | 17 | 56,303,337 | 56,323,486 | 20,149 +  | 1 |
| GenelD:19280    | Ptprs         | 17 | 56,412,426 | 56,476,480 | 64,054 -  | 4 |
| GenelD:668592   | Gm9258        | 17 | 56,475,357 | 56,476,279 | 922 -     | 1 |
| GenelD:224902   | Safb2         | 17 | 56,562,942 | 56,584,583 | 21,641 -  | 1 |
| GenelD:224903   | Safb          | 17 | 56,584,982 | 56,606,294 | 21,312 +  | 2 |
| GenelD:224904   | 2410015M20Rik | 17 | 56,607,452 | 56,609,771 | 2,319 -   | 1 |
| GenelD:54217    | Rpl36         | 17 | 56,613,395 | 56,614,246 | 851 +     | 1 |
| GenelD:74142    | Lonp1         | 17 | 56,614,297 | 56,626,903 | 12,606 -  | 2 |
| GenelD:106757   | Catsperd      | 17 | 56,628,143 | 56,664,456 | 36,313 +  | 1 |
| GenelD:71810    | Ranbp3        | 17 | 56,673,225 | 56,711,769 | 38,544 +  | 1 |
| GenelD:106639   | Vmac          | 17 | 56,713,932 | 56,717,699 | 3,767 -   | 1 |
| GenelD:69875    | Ndufa11       | 17 | 56,717,762 | 56,724,248 | 6,486 +   | 1 |
| GenelD:18188    | Nrtn          | 17 | 56,751,325 | 56,757,530 | 6,205 -   | 2 |
| GenelD:224907   | Dus3l         | 17 | 56,764,751 | 56,770,093 | 5,342 +   | 1 |

|                 |               |    |            |            |           |   |
|-----------------|---------------|----|------------|------------|-----------|---|
| GenelD:64144    | Mllt1         | 17 | 56,892,611 | 56,935,388 | 42,777 -  | 1 |
| GenelD:13640    | Efna5         | 17 | 62,602,957 | 62,881,317 | 278,360 - | 2 |
| GenelD:50758    | Fbxl17        | 17 | 63,045,949 | 63,500,580 | 454,631 - | 1 |
| GenelD:320004   | A930002H24Rik | 17 | 63,862,068 | 63,867,181 | 5,113 -   | 1 |
| GenelD:224938   | Pja2          | 17 | 64,281,006 | 64,331,883 | 50,877 -  | 1 |
| GenelD:17158    | Man2a1        | 17 | 64,601,649 | 64,755,110 | 153,461 + | 1 |
| GenelD:30960    | Vapa          | 17 | 65,580,053 | 65,613,555 | 33,502 -  | 2 |
| GenelD:106572   | Rab31         | 17 | 65,651,726 | 65,772,752 | 121,026 - | 2 |
| GenelD:70351    | Ppp4r1        | 17 | 65,783,355 | 65,841,926 | 58,571 +  | 2 |
| GenelD:19765    | Ralbp1        | 17 | 65,848,415 | 65,885,755 | 37,340 -  | 1 |
| GenelD:65960    | Twsg1         | 17 | 65,923,065 | 65,951,187 | 28,122 -  | 1 |
| GenelD:106585   | Ankrd12       | 17 | 65,967,501 | 66,077,046 | 109,545 - | 1 |
| GenelD:71331    | 5430411C19Rik | 17 | 66,076,639 | 66,077,968 | 1,329 +   | 1 |
| GenelD:72900    | Ndufv2        | 17 | 66,078,795 | 66,101,491 | 22,696 -  | 3 |
| GenelD:68767    | Wash          | 17 | 66,111,546 | 66,120,503 | 8,957 +   | 2 |
| GenelD:68617    | Soga2         | 17 | 66,336,982 | 66,449,750 | 112,768 - | 1 |
| GenelD:19328    | Rab12         | 17 | 66,494,512 | 66,519,670 | 25,158 -  | 1 |
| GenelD:19274    | Ptpm          | 17 | 66,666,848 | 67,354,459 | 687,611 - | 1 |
| GenelD:16772    | Lama1         | 17 | 67,697,265 | 67,822,645 | 125,380 + | 1 |
| GenelD:622645   | Tmem200c      | 17 | 68,837,136 | 68,843,138 | 6,002 +   | 1 |
| GenelD:13823    | Epb4.1l3      | 17 | 69,156,810 | 69,289,989 | 133,179 + | 1 |
| GenelD:77533    | C030034I22Rik | 17 | 69,416,447 | 69,419,193 | 2,746 +   | 1 |
| GenelD:21815    | Tgif1         | 17 | 70,844,205 | 70,853,532 | 9,327 -   | 2 |
| GenelD:10031667 | Mir1195       | 17 | 70,860,478 | 70,860,600 | 122 -     | 2 |
| GenelD:67938    | Myl12b        | 17 | 70,973,963 | 70,990,516 | 16,553 -  | 1 |
| GenelD:67268    | Myl12a        | 17 | 70,993,793 | 71,002,533 | 8,740 -   | 2 |
| GenelD:74355    | Smchd1        | 17 | 71,344,489 | 71,475,343 | 130,854 - | 1 |
| GenelD:67052    | Ndc80         | 17 | 71,496,100 | 71,526,857 | 30,757 -  | 1 |
| GenelD:70891    | Spdya         | 17 | 71,552,061 | 71,589,533 | 37,472 +  | 1 |
| GenelD:68789    | Trmt61b       | 17 | 71,557,027 | 71,598,761 | 41,734 -  | 1 |
| GenelD:72515    | Wdr43         | 17 | 71,616,215 | 71,659,031 | 42,816 +  | 1 |
| GenelD:11682    | Alk           | 17 | 71,868,988 | 72,604,307 | 735,319 - | 1 |
| GenelD:383295   | Ypel5         | 17 | 72,836,704 | 72,851,195 | 14,491 +  | 1 |
| GenelD:77889    | Lbh           | 17 | 72,918,305 | 72,941,946 | 23,641 +  | 1 |
| GenelD:225010   | Lclat1        | 17 | 73,107,985 | 73,243,368 | 135,383 + | 1 |
| GenelD:76890    | Memo1         | 17 | 74,200,700 | 74,294,863 | 94,163 -  | 1 |
| GenelD:66310    | Dpy30         | 17 | 74,299,474 | 74,323,944 | 24,470 -  | 2 |
| GenelD:50850    | Spast         | 17 | 74,338,987 | 74,391,113 | 52,126 +  | 1 |
| GenelD:67864    | Yipf4         | 17 | 74,489,493 | 74,500,277 | 10,784 +  | 1 |
| GenelD:12211    | Birc6         | 17 | 74,528,295 | 74,703,773 | 175,478 + | 1 |
| GenelD:268977   | Ltbp1         | 17 | 75,005,529 | 75,392,967 | 387,438 + | 1 |
| GenelD:50766    | Crim1         | 17 | 78,200,248 | 78,376,592 | 176,344 + | 1 |
| GenelD:268980   | Strn          | 17 | 78,653,964 | 78,736,560 | 82,596 -  | 1 |
| GenelD:260409   | Cdc42ep3      | 17 | 79,334,025 | 79,355,091 | 21,066 -  | 1 |
| GenelD:10105564 | LOC101055649  | 17 | 79,578,593 | 79,612,476 | 33,883 +  | 1 |
| GenelD:381110   | Rmdn2         | 17 | 79,614,900 | 79,682,152 | 67,252 +  | 1 |
| GenelD:13078    | Cyp1b1        | 17 | 79,706,953 | 79,715,041 | 8,088 -   | 1 |

|                 |               |    |            |            |             |   |
|-----------------|---------------|----|------------|------------|-------------|---|
| GenelD:56298    | Atl2          | 17 | 79,848,392 | 79,896,123 | 47,731 -    | 2 |
| GenelD:72692    | Hnrpll        | 17 | 80,029,487 | 80,062,334 | 32,847 -    | 1 |
| GenelD:225027   | Srsf7         | 17 | 80,200,080 | 80,207,305 | 7,225 -     | 1 |
| GenelD:67737    | Ttc39d        | 17 | 80,215,914 | 80,217,936 | 2,022 +     | 1 |
| GenelD:381112   | Arhgef33      | 17 | 80,307,407 | 80,388,689 | 81,282 +    | 1 |
| GenelD:791338   | Gm10190       | 17 | 80,371,857 | 80,373,542 | 1,685 -     | 1 |
| GenelD:20662    | Sos1          | 17 | 80,393,752 | 80,480,453 | 86,701 -    | 2 |
| GenelD:225028   | Map4k3        | 17 | 80,580,512 | 80,728,093 | 147,581 -   | 1 |
| GenelD:72167    | Thumpd2       | 17 | 81,026,327 | 81,065,085 | 38,758 -    | 1 |
| GenelD:106522   | Pkdcc         | 17 | 83,215,283 | 83,225,069 | 9,786 +     | 1 |
| GenelD:225030   | Kcng3         | 17 | 83,585,957 | 83,631,895 | 45,938 -    | 1 |
| GenelD:12193    | Zfp36l2       | 17 | 84,183,924 | 84,187,947 | 4,023 -     | 2 |
| GenelD:240174   | Thada         | 17 | 84,190,056 | 84,466,208 | 276,152 -   | 2 |
| GenelD:72416    | Lrpprc        | 17 | 84,705,247 | 84,790,786 | 85,539 -    | 1 |
| GenelD:213760   | Prepl         | 17 | 85,063,477 | 85,090,274 | 26,797 -    | 1 |
| GenelD:73582    | Camkmt        | 17 | 85,090,700 | 85,458,580 | 367,880 +   | 1 |
| GenelD:10004390 | Six3os1       | 17 | 85,601,932 | 85,618,396 | 16,464 -    | 2 |
| GenelD:20473    | Six3          | 17 | 85,620,834 | 85,626,191 | 5,357 +     | 2 |
| GenelD:20472    | Six2          | 17 | 85,684,268 | 85,688,254 | 3,986 -     | 1 |
| GenelD:78586    | Srbd1         | 17 | 85,984,665 | 86,145,175 | 160,510 -   | 1 |
| GenelD:545228   | Gm5817        | 17 | 86,165,461 | 86,168,023 | 2,562 -     | 1 |
| GenelD:18754    | Prkce         | 17 | 86,167,785 | 86,657,919 | 490,134 +   | 1 |
| GenelD:13819    | Epas1         | 17 | 86,753,864 | 86,833,410 | 79,546 +    | 1 |
| GenelD:56468    | Socs5         | 17 | 87,107,679 | 87,137,585 | 29,906 +    | 1 |
| GenelD:193813   | Mcf2          | 17 | 87,254,443 | 87,265,947 | 11,504 -    | 1 |
| GenelD:74597    | 4833418N02Rik | 17 | 87,274,886 | 87,282,814 | 7,928 -     | 2 |
| GenelD:225049   | Ttc7          | 17 | 87,282,886 | 87,381,770 | 98,884 +    | 1 |
| GenelD:12314    | Calm2         | 17 | 87,433,401 | 87,446,935 | 13,534 -    | 1 |
| GenelD:210741   | Kcnk12        | 17 | 87,745,821 | 87,797,994 | 52,173 -    | 2 |
| GenelD:10105563 | LOC101055631  | 17 | 87,968,658 | 87,974,955 | 6,297 -     | 1 |
| GenelD:17688    | Msh6          | 17 | 87,975,050 | 87,990,892 | 15,842 +    | 1 |
| GenelD:225055   | Fbxo11        | 17 | 87,990,859 | 88,065,285 | 74,426 -    | 2 |
| GenelD:14236    | Foxn2         | 17 | 88,440,712 | 88,490,533 | 49,821 +    | 1 |
| GenelD:18189    | Nrxn1         | 17 | 90,033,644 | 91,092,802 | 1,059,158 - | 1 |
| GenelD:12916    | Crem          | 18 | 3,266,354  | 3,337,589  | 71,235 -    | 1 |
| GenelD:633947   | Gm6225        | 18 | 3,336,416  | 3,366,863  | 30,447 +    | 1 |
| GenelD:71745    | Cul2          | 18 | 3,383,225  | 3,436,700  | 53,475 +    | 1 |
| GenelD:68010    | Bambi         | 18 | 3,507,957  | 3,516,404  | 8,447 +     | 1 |
| GenelD:73915    | 4833419F23Rik | 18 | 4,353,547  | 4,368,945  | 15,398 +    | 1 |
| GenelD:67440    | Mtpap         | 18 | 4,375,592  | 4,397,330  | 21,738 +    | 1 |
| GenelD:240185   | 9430020K01Rik | 18 | 4,634,929  | 4,682,869  | 47,940 +    | 1 |
| GenelD:240186   | Zfp438        | 18 | 5,210,031  | 5,334,439  | 124,408 -   | 1 |
| GenelD:791318   | Gm10125       | 18 | 5,491,501  | 5,592,437  | 100,936 -   | 2 |
| GenelD:21417    | Zeb1          | 18 | 5,591,860  | 5,775,468  | 183,608 +   | 2 |
| GenelD:75415    | Arhgap12      | 18 | 6,024,448  | 6,136,098  | 111,650 -   | 1 |
| GenelD:16573    | Kif5b         | 18 | 6,201,005  | 6,241,524  | 40,519 -    | 1 |
| GenelD:13831    | Epc1          | 18 | 6,435,951  | 6,516,087  | 80,136 -    | 2 |

|                 |               |    |            |            |           |   |
|-----------------|---------------|----|------------|------------|-----------|---|
| GenelD:10031677 | Mir1893       | 18 | 6,490,564  | 6,490,646  | 82 -      | 1 |
| GenelD:210719   | Mkx           | 18 | 6,934,966  | 7,004,779  | 69,813 -  | 1 |
| GenelD:225131   | Wac           | 18 | 7,868,858  | 7,929,027  | 60,169 +  | 2 |
| GenelD:14370    | Fzd8          | 18 | 9,212,856  | 9,216,201  | 3,345 +   | 1 |
| GenelD:67974    | Ccny          | 18 | 9,314,044  | 9,450,150  | 136,106 - | 1 |
| GenelD:225160   | Thoc1         | 18 | 9,958,180  | 9,995,484  | 37,304 +  | 1 |
| GenelD:19877    | Rock1         | 18 | 10,064,401 | 10,181,792 | 117,391 - | 1 |
| GenelD:381157   | Greb1l        | 18 | 10,325,179 | 10,562,941 | 237,762 + | 1 |
| GenelD:77805    | Esco1         | 18 | 10,566,512 | 10,610,352 | 43,840 -  | 1 |
| GenelD:20641    | Snrpd1        | 18 | 10,617,796 | 10,628,230 | 10,434 +  | 1 |
| GenelD:106861   | Abhd3         | 18 | 10,644,411 | 10,706,696 | 62,285 -  | 1 |
| GenelD:75370    | 4930563E18Rik | 18 | 10,706,860 | 10,711,832 | 4,972 +   | 1 |
| GenelD:68434    | 1010001N08Rik | 18 | 11,049,087 | 11,051,481 | 2,394 -   | 1 |
| GenelD:14465    | Gata6         | 18 | 11,052,510 | 11,085,635 | 33,125 +  | 1 |
| GenelD:225182   | Rbbp8         | 18 | 11,633,276 | 11,743,207 | 109,931 + | 1 |
| GenelD:621998   | Gm6277        | 18 | 11,821,088 | 11,839,377 | 18,289 -  | 1 |
| GenelD:63955    | Cables1       | 18 | 11,839,274 | 11,945,627 | 106,353 + | 1 |
| GenelD:10031668 | Mir1901       | 18 | 11,840,361 | 11,840,438 | 77 -      | 1 |
| GenelD:18145    | Npc1          | 18 | 12,189,694 | 12,236,386 | 46,692 -  | 1 |
| GenelD:72747    | Ttc39c        | 18 | 12,643,533 | 12,737,052 | 93,519 +  | 1 |
| GenelD:64291    | Osbp1a        | 18 | 12,755,312 | 12,941,841 | 186,529 - | 1 |
| GenelD:268996   | Ss18          | 18 | 14,625,629 | 14,682,914 | 57,285 -  | 1 |
| GenelD:72504    | Taf4b         | 18 | 14,783,245 | 14,900,359 | 117,114 + | 1 |
| GenelD:106931   | Kctd1         | 18 | 14,968,685 | 15,151,446 | 182,761 - | 2 |
| GenelD:12558    | Cdh2          | 18 | 16,588,877 | 16,809,049 | 220,172 - | 2 |
| GenelD:328906   | Gm15328       | 18 | 16,816,407 | 16,822,783 | 6,376 +   | 2 |
| GenelD:75964    | Trappc8       | 18 | 20,817,224 | 20,896,078 | 78,854 -  | 1 |
| GenelD:56515    | Rnf138        | 18 | 21,001,341 | 21,028,223 | 26,882 +  | 1 |
| GenelD:381126   | Garem         | 18 | 21,127,342 | 21,300,139 | 172,797 - | 1 |
| GenelD:211961   | Asxl3         | 18 | 22,345,089 | 22,530,227 | 185,138 + | 1 |
| GenelD:69256    | Zfp397        | 18 | 23,954,688 | 23,964,671 | 9,983 +   | 1 |
| GenelD:59057    | Zfp191        | 18 | 24,012,267 | 24,020,771 | 8,504 -   | 1 |
| GenelD:14423    | Galnt1        | 18 | 24,205,344 | 24,286,816 | 81,472 +  | 1 |
| GenelD:68046    | 2700062C07Rik | 18 | 24,470,871 | 24,477,767 | 6,896 +   | 1 |
| GenelD:225283   | Rprd1a        | 18 | 24,484,962 | 24,530,204 | 45,242 -  | 1 |
| GenelD:106957   | Slc39a6       | 18 | 24,579,881 | 24,603,817 | 23,936 -  | 1 |
| GenelD:58523    | Elp2          | 18 | 24,603,961 | 24,638,830 | 34,869 +  | 1 |
| GenelD:68591    | Mocos         | 18 | 24,653,691 | 24,701,556 | 47,865 +  | 1 |
| GenelD:225288   | Fhod3         | 18 | 24,709,445 | 25,133,501 | 424,056 + | 1 |
| GenelD:67453    | Slc25a46      | 18 | 31,580,168 | 31,609,902 | 29,734 -  | 1 |
| GenelD:69241    | Polr2d        | 18 | 31,789,159 | 31,796,701 | 7,542 +   | 1 |
| GenelD:74320    | Wdr33         | 18 | 31,804,057 | 31,908,987 | 104,930 + | 1 |
| GenelD:73473    | lws1          | 18 | 32,067,734 | 32,104,331 | 36,597 +  | 1 |
| GenelD:26405    | Map3k2        | 18 | 32,163,089 | 32,236,751 | 73,662 +  | 1 |
| GenelD:402767   | A830052D11Rik | 18 | 32,359,057 | 32,378,284 | 19,227 -  | 1 |
| GenelD:30948    | Bin1          | 18 | 32,377,217 | 32,435,740 | 58,523 +  | 1 |
| GenelD:75795    | 4930455D15Rik | 18 | 32,663,642 | 32,837,287 | 173,645 - | 1 |

|                 |               |    |            |            |           |   |
|-----------------|---------------|----|------------|------------|-----------|---|
| GenelD:225348   | Wdr36         | 18 | 32,837,225 | 32,866,420 | 29,195 +  | 1 |
| GenelD:27528    | Nrep          | 18 | 33,437,019 | 33,464,029 | 27,010 -  | 1 |
| GenelD:433171   | Gm10549       | 18 | 33,464,163 | 33,474,710 | 10,547 +  | 1 |
| GenelD:69749    | 2410004N09Rik | 18 | 33,794,892 | 33,795,989 | 1,097 +   | 1 |
| GenelD:13824    | Epb4.1l4a     | 18 | 33,796,327 | 34,007,206 | 210,879 - | 2 |
| GenelD:633395   | Gm10548       | 18 | 34,207,775 | 34,221,772 | 13,997 -  | 1 |
| GenelD:11789    | Apc           | 18 | 34,220,984 | 34,322,190 | 101,206 + | 2 |
| GenelD:66384    | Srp19         | 18 | 34,331,145 | 34,336,599 | 5,454 +   | 1 |
| GenelD:13476    | Reep5         | 18 | 34,344,885 | 34,373,415 | 28,530 -  | 1 |
| GenelD:225358   | Fam13b        | 18 | 34,442,351 | 34,506,823 | 64,472 -  | 1 |
| GenelD:78656    | Brd8          | 18 | 34,598,615 | 34,624,810 | 26,195 -  | 1 |
| GenelD:19348    | Kif20a        | 18 | 34,624,624 | 34,633,277 | 8,653 +   | 1 |
| GenelD:52563    | Cdc23         | 18 | 34,631,683 | 34,651,736 | 20,053 -  | 1 |
| GenelD:12532    | Cdc25c        | 18 | 34,732,997 | 34,751,533 | 18,536 -  | 1 |
| GenelD:10050308 | 2010110K18Rik | 18 | 34,753,443 | 34,758,297 | 4,854 +   | 1 |
| GenelD:66306    | Fam53c        | 18 | 34,758,906 | 34,773,760 | 14,854 +  | 2 |
| GenelD:277250   | Kdm3b         | 18 | 34,777,008 | 34,839,370 | 62,362 +  | 1 |
| GenelD:13653    | Egr1          | 18 | 34,861,207 | 34,864,956 | 3,749 +   | 2 |
| GenelD:225363   | Etf1          | 18 | 34,902,785 | 34,932,003 | 29,218 -  | 1 |
| GenelD:15526    | Hspa9         | 18 | 34,937,414 | 34,954,351 | 16,937 -  | 1 |
| GenelD:10050338 | Snhg4         | 18 | 35,553,410 | 35,558,316 | 4,906 +   | 1 |
| GenelD:10031670 | Mir1949       | 18 | 35,554,567 | 35,554,636 | 69 +      | 1 |
| GenelD:436583   | Snora74a      | 18 | 35,557,030 | 35,557,227 | 197 +     | 1 |
| GenelD:17184    | Matr3         | 18 | 35,562,158 | 35,592,045 | 29,887 +  | 2 |
| GenelD:67869    | Paip2         | 18 | 35,598,667 | 35,617,185 | 18,518 +  | 1 |
| GenelD:67393    | Cxxc5         | 18 | 35,829,818 | 35,861,688 | 31,870 +  | 3 |
| GenelD:10004215 | Nrg2          | 18 | 36,017,649 | 36,197,160 | 179,511 - | 2 |
| GenelD:19290    | Pura          | 18 | 36,281,162 | 36,288,245 | 7,083 +   | 2 |
| GenelD:93709    | Pcdhga1       | 18 | 37,661,945 | 37,841,870 | 179,925 + | 1 |
| GenelD:93710    | Pcdhga2       | 18 | 37,669,105 | 37,841,870 | 172,765 + | 1 |
| GenelD:93711    | Pcdhga3       | 18 | 37,674,335 | 37,841,873 | 167,538 + | 1 |
| GenelD:93699    | Pcdhgb1       | 18 | 37,680,458 | 37,841,870 | 161,412 + | 1 |
| GenelD:93712    | Pcdhga4       | 18 | 37,685,400 | 37,841,870 | 156,470 + | 1 |
| GenelD:93700    | Pcdhgb2       | 18 | 37,689,859 | 37,841,872 | 152,013 + | 1 |
| GenelD:93713    | Pcdhga5       | 18 | 37,694,501 | 37,841,870 | 147,369 + | 1 |
| GenelD:93714    | Pcdhga6       | 18 | 37,707,229 | 37,841,870 | 134,641 + | 1 |
| GenelD:93715    | Pcdhga7       | 18 | 37,714,834 | 37,841,873 | 127,039 + | 1 |
| GenelD:93701    | Pcdhgb4       | 18 | 37,720,554 | 37,841,870 | 121,316 + | 1 |
| GenelD:93716    | Pcdhga8       | 18 | 37,725,706 | 37,841,873 | 116,167 + | 1 |
| GenelD:93702    | Pcdhgb5       | 18 | 37,731,154 | 37,841,870 | 110,716 + | 1 |
| GenelD:93717    | Pcdhga9       | 18 | 37,736,936 | 37,841,863 | 104,927 + | 1 |
| GenelD:93703    | Pcdhgb6       | 18 | 37,742,094 | 37,841,873 | 99,779 +  | 1 |
| GenelD:93722    | Pcdhga10      | 18 | 37,747,188 | 37,841,870 | 94,682 +  | 1 |
| GenelD:93704    | Pcdhgb7       | 18 | 37,751,779 | 37,841,870 | 90,091 +  | 1 |
| GenelD:93723    | Pcdhga11      | 18 | 37,755,773 | 37,841,873 | 86,100 +  | 1 |
| GenelD:93705    | Pcdhgb8       | 18 | 37,761,801 | 37,841,873 | 80,072 +  | 1 |
| GenelD:93724    | Pcdhga12      | 18 | 37,765,580 | 37,841,873 | 76,293 +  | 1 |

|                 |               |    |            |            |           |   |
|-----------------|---------------|----|------------|------------|-----------|---|
| GenelD:93706    | Pcdhgc3       | 18 | 37,806,410 | 37,841,873 | 35,463 +  | 1 |
| GenelD:93707    | Pcdhgc4       | 18 | 37,815,079 | 37,841,873 | 26,794 +  | 1 |
| GenelD:13367    | Diap1         | 18 | 37,844,824 | 37,935,411 | 90,587 -  | 1 |
| GenelD:15183    | Hdac3         | 18 | 37,936,971 | 37,954,988 | 18,017 -  | 2 |
| GenelD:225392   | Rell2         | 18 | 37,955,559 | 37,959,179 | 3,620 +   | 1 |
| GenelD:319262   | Fchsd1        | 18 | 37,957,434 | 37,969,731 | 12,297 -  | 1 |
| GenelD:56736    | Rnf14         | 18 | 38,296,635 | 38,317,849 | 21,214 +  | 1 |
| GenelD:26384    | Gnpda1        | 18 | 38,327,537 | 38,338,993 | 11,456 -  | 1 |
| GenelD:65113    | Ndfip1        | 18 | 38,418,975 | 38,464,406 | 45,431 +  | 1 |
| GenelD:24066    | Spry4         | 18 | 38,586,265 | 38,601,268 | 15,003 -  | 1 |
| GenelD:381155   | 9630014M24Rik | 18 | 38,601,534 | 38,645,922 | 44,388 +  | 1 |
| GenelD:71302    | Arhgap26      | 18 | 38,993,145 | 39,376,285 | 383,140 + | 1 |
| GenelD:14815    | Nr3c1         | 18 | 39,410,545 | 39,487,245 | 76,700 -  | 3 |
| GenelD:56070    | Tcerg1        | 18 | 42,511,487 | 42,575,785 | 64,298 +  | 1 |
| GenelD:22240    | Dpysl3        | 18 | 43,324,227 | 43,393,331 | 69,104 -  | 1 |
| GenelD:10086230 | LOC100862305  | 18 | 43,437,584 | 43,438,377 | 793 -     | 1 |
| GenelD:10004207 | Gm3650        | 18 | 43,445,110 | 43,475,271 | 30,161 +  | 1 |
| GenelD:240255   | Ythdc2        | 18 | 44,828,665 | 44,889,720 | 61,055 +  | 1 |
| GenelD:140492   | Kcnn2         | 18 | 45,560,154 | 45,685,883 | 125,729 + | 1 |
| GenelD:240263   | Fem1c         | 18 | 46,504,606 | 46,525,971 | 21,365 -  | 1 |
| GenelD:66676    | Tmed7         | 18 | 46,585,928 | 46,597,535 | 11,607 -  | 1 |
| GenelD:13664    | Eif1a         | 18 | 46,597,704 | 46,610,225 | 12,521 +  | 1 |
| GenelD:67526    | Atg12         | 18 | 46,732,417 | 46,741,579 | 9,162 -   | 1 |
| GenelD:11777    | Ap3s1         | 18 | 46,741,917 | 46,790,826 | 48,909 +  | 1 |
| GenelD:74574    | 4833403I15Rik | 18 | 46,850,039 | 46,905,446 | 55,407 +  | 1 |
| GenelD:20358    | Sema6a        | 18 | 47,245,254 | 47,368,868 | 123,614 - | 1 |
| GenelD:240283   | Dmxl1         | 18 | 49,832,997 | 49,965,473 | 132,476 + | 1 |
| GenelD:16948    | Lox           | 18 | 52,517,238 | 52,529,708 | 12,470 -  | 1 |
| GenelD:67847    | Sncaip        | 18 | 52,767,811 | 52,915,931 | 148,120 + | 1 |
| GenelD:67804    | Snx2          | 18 | 53,176,365 | 53,220,860 | 44,495 +  | 1 |
| GenelD:225518   | Prdm6         | 18 | 53,464,546 | 53,575,857 | 111,311 + | 1 |
| GenelD:70425    | Csnk1g3       | 18 | 53,862,113 | 53,955,684 | 93,571 +  | 1 |
| GenelD:16906    | Lmnb1         | 18 | 56,707,813 | 56,753,424 | 45,611 +  | 1 |
| GenelD:320253   | March3        | 18 | 56,761,716 | 56,925,548 | 163,832 - | 1 |
| GenelD:20496    | Slc12a2       | 18 | 57,878,678 | 57,946,821 | 68,143 +  | 1 |
| GenelD:14119    | Fbn2          | 18 | 58,008,623 | 58,209,926 | 201,303 - | 1 |
| GenelD:240322   | Adamts19      | 18 | 58,836,764 | 59,053,678 | 216,914 + | 1 |
| GenelD:78923    | Chsy3         | 18 | 59,175,340 | 59,411,336 | 235,996 + | 1 |
| GenelD:67665    | Dctn4         | 18 | 60,526,221 | 60,558,762 | 32,541 +  | 1 |
| GenelD:66810    | Rbm22         | 18 | 60,560,786 | 60,572,729 | 11,943 +  | 1 |
| GenelD:170947   | Myoz3         | 18 | 60,573,717 | 60,591,716 | 17,999 -  | 1 |
| GenelD:104027   | Synpo         | 18 | 60,593,990 | 60,624,305 | 30,315 -  | 3 |
| GenelD:10105583 | LOC101055835  | 18 | 60,605,866 | 60,660,142 | 54,276 -  | 3 |
| GenelD:20044    | Rps14         | 18 | 60,774,596 | 60,778,546 | 3,950 +   | 1 |
| GenelD:21453    | Tcof1         | 18 | 60,813,755 | 60,848,964 | 35,209 -  | 1 |
| GenelD:12590    | Cdx1          | 18 | 61,018,862 | 61,036,199 | 17,337 -  | 1 |
| GenelD:18596    | Pdgfrb        | 18 | 61,045,150 | 61,085,067 | 39,917 +  | 1 |



|                 |               |    |            |            |           |   |
|-----------------|---------------|----|------------|------------|-----------|---|
| GenelD:106894   | Hmgxb3        | 18 | 61,131,277 | 61,177,050 | 45,773 -  | 1 |
| GenelD:170826   | Ppargc1b      | 18 | 61,298,136 | 61,400,431 | 102,295 - | 2 |
| GenelD:723889   | Mir378        | 18 | 61,397,835 | 61,397,900 | 65 -      | 2 |
| GenelD:93687    | Csnk1a1       | 18 | 61,555,582 | 61,588,299 | 32,717 +  | 1 |
| GenelD:15562    | Htr4          | 18 | 62,324,204 | 62,467,802 | 143,598 + | 1 |
| GenelD:108123   | Napg          | 18 | 62,977,916 | 62,999,450 | 21,534 +  | 1 |
| GenelD:667742   | Piezo2        | 18 | 63,010,213 | 63,387,183 | 376,970 - | 1 |
| GenelD:53382    | Txnl1         | 18 | 63,662,801 | 63,692,359 | 29,558 -  | 1 |
| GenelD:54670    | Atp8b1        | 18 | 64,528,979 | 64,661,000 | 132,021 - | 1 |
| GenelD:83814    | Nedd4l        | 18 | 64,887,756 | 65,217,826 | 330,070 + | 1 |
| GenelD:10050346 | AA667203      | 18 | 64,894,744 | 64,901,218 | 6,474 +   | 1 |
| GenelD:66286    | Sec11c        | 18 | 65,800,578 | 65,817,657 | 17,079 +  | 1 |
| GenelD:19434    | Rax           | 18 | 65,934,639 | 65,939,089 | 4,450 -   | 1 |
| GenelD:360222   | Raxos1        | 18 | 65,937,538 | 65,940,447 | 2,909 +   | 1 |
| GenelD:70361    | Lman1         | 18 | 65,980,739 | 66,002,635 | 21,896 -  | 1 |
| GenelD:320924   | Ccbe1         | 18 | 66,056,856 | 66,291,838 | 234,982 - | 1 |
| GenelD:10050354 | Gm15958       | 18 | 66,291,274 | 66,319,607 | 28,333 +  | 1 |
| GenelD:14680    | Gnal          | 18 | 67,088,336 | 67,226,792 | 138,456 + | 2 |
| GenelD:67064    | Chmp1b        | 18 | 67,205,359 | 67,207,887 | 2,528 +   | 1 |
| GenelD:225651   | Mppe1         | 18 | 67,225,530 | 67,245,830 | 20,300 -  | 1 |
| GenelD:114663   | Impa2         | 18 | 67,289,223 | 67,318,841 | 29,618 +  | 1 |
| GenelD:67951    | Tubb6         | 18 | 67,390,731 | 67,402,749 | 12,018 +  | 1 |
| GenelD:69597    | Afg3l2        | 18 | 67,404,764 | 67,449,136 | 44,372 -  | 1 |
| GenelD:225655   | Slmo1         | 18 | 67,464,849 | 67,480,581 | 15,732 +  | 1 |
| GenelD:225659   | Cep76         | 18 | 67,617,397 | 67,641,336 | 23,939 -  | 1 |
| GenelD:107047   | Psmg2         | 18 | 67,641,599 | 67,654,162 | 12,563 +  | 1 |
| GenelD:19255    | Ptpn2         | 18 | 67,665,501 | 67,724,621 | 59,120 -  | 1 |
| GenelD:72124    | Seh1l         | 18 | 67,774,876 | 67,795,487 | 20,611 +  | 1 |
| GenelD:75286    | 4930549G23Rik | 18 | 67,776,033 | 67,799,943 | 23,910 -  | 1 |
| GenelD:52662    | Ldlrad4       | 18 | 67,933,257 | 68,255,549 | 322,292 + | 1 |
| GenelD:269033   | 4930503L19Rik | 18 | 70,453,140 | 70,472,480 | 19,340 -  | 1 |
| GenelD:170461   | Stard6        | 18 | 70,472,545 | 70,501,063 | 28,518 +  | 1 |
| GenelD:240396   | Mex3c         | 18 | 73,572,705 | 73,592,578 | 19,873 +  | 1 |
| GenelD:114615   | Elac1         | 18 | 73,735,038 | 73,754,479 | 19,441 -  | 1 |
| GenelD:107029   | Me2           | 18 | 73,770,040 | 73,815,392 | 45,352 -  | 1 |
| GenelD:225724   | Mapk4         | 18 | 73,928,486 | 74,064,949 | 136,463 - | 1 |
| GenelD:66468    | Ska1          | 18 | 74,195,299 | 74,207,818 | 12,519 -  | 1 |
| GenelD:74322    | Cxxc1         | 18 | 74,216,212 | 74,221,491 | 5,279 +   | 1 |
| GenelD:17919    | Myo5b         | 18 | 74,442,619 | 74,771,477 | 328,858 + | 1 |
| GenelD:319195   | Rpl17         | 18 | 75,000,477 | 75,003,381 | 2,904 +   | 1 |
| GenelD:10021745 | Snord58b      | 18 | 75,001,068 | 75,001,122 | 54 +      | 1 |
| GenelD:407819   | BC031181      | 18 | 75,005,900 | 75,009,933 | 4,033 +   | 2 |
| GenelD:69190    | Dym           | 18 | 75,018,772 | 75,286,966 | 268,194 + | 1 |
| GenelD:17131    | Smad7         | 18 | 75,367,365 | 75,395,934 | 28,569 +  | 6 |
| GenelD:269037   | Ctif          | 18 | 75,431,205 | 75,697,696 | 266,491 - | 1 |
| GenelD:207259   | Zbtb7c        | 18 | 75,820,178 | 76,148,564 | 328,386 + | 3 |
| GenelD:66191    | Ier3ip1       | 18 | 76,930,027 | 76,941,614 | 11,587 +  | 1 |

|               |               |    |            |            |           |   |
|---------------|---------------|----|------------|------------|-----------|---|
| GenelD:225742 | St8sia5       | 18 | 77,185,847 | 77,255,450 | 69,603 +  | 1 |
| GenelD:212163 | 8030462N17Rik | 18 | 77,633,281 | 77,714,010 | 80,729 -  | 2 |
| GenelD:67640  | 4930465K10Rik | 18 | 77,714,184 | 77,715,445 | 1,261 +   | 2 |
| GenelD:225745 | Haus1         | 18 | 77,757,567 | 77,767,780 | 10,213 -  | 1 |
| GenelD:11946  | Atp5a1        | 18 | 77,773,768 | 77,782,869 | 9,101 +   | 1 |
| GenelD:619308 | F830208F22Rik | 18 | 77,793,257 | 77,796,743 | 3,486 -   | 1 |
| GenelD:19201  | Pstpip2       | 18 | 77,794,550 | 77,882,879 | 88,329 +  | 1 |
| GenelD:240427 | Setbp1        | 18 | 78,750,378 | 79,109,391 | 359,013 - | 1 |
| GenelD:93737  | Pard6g        | 18 | 80,046,895 | 80,119,640 | 72,745 +  | 1 |
| GenelD:66255  | Hsbp1l1       | 18 | 80,229,751 | 80,247,102 | 17,351 -  | 1 |
| GenelD:66943  | Pqlc1         | 18 | 80,255,245 | 80,292,724 | 37,479 +  | 1 |
| GenelD:18018  | Nfatc1        | 18 | 80,606,205 | 80,713,071 | 106,866 - | 2 |
| GenelD:50771  | Atp9b         | 18 | 80,734,141 | 80,934,058 | 199,917 - | 1 |
| GenelD:20689  | Sall3         | 18 | 80,966,359 | 80,986,578 | 20,219 -  | 1 |
| GenelD:17196  | Mbp           | 18 | 82,475,123 | 82,585,637 | 110,514 + | 1 |
| GenelD:329002 | Zfp236        | 18 | 82,593,597 | 82,692,734 | 99,137 -  | 1 |
| GenelD:110796 | Tshz1         | 18 | 84,011,627 | 84,086,562 | 74,935 -  | 2 |
| GenelD:225791 | Zadh2         | 18 | 84,088,158 | 84,097,514 | 9,356 +   | 2 |
| GenelD:66054  | Cndp2         | 18 | 84,667,469 | 84,685,633 | 18,164 -  | 1 |
| GenelD:54607  | Socs6         | 18 | 88,867,880 | 88,894,207 | 26,327 -  | 1 |
| GenelD:12894  | Cpt1a         | 19 | 3,323,301  | 3,385,733  | 62,432 +  | 3 |
| GenelD:17771  | Mtl5          | 19 | 3,388,869  | 3,407,785  | 18,916 +  | 1 |
| GenelD:52036  | Ppp6r3        | 19 | 3,454,928  | 3,575,749  | 120,821 - | 1 |
| GenelD:16973  | Lrp5          | 19 | 3,584,825  | 3,686,564  | 101,739 - | 2 |
| GenelD:225888 | Suv420h1      | 19 | 3,767,421  | 3,818,303  | 50,882 +  | 1 |
| GenelD:12660  | Chka          | 19 | 3,851,773  | 3,894,367  | 42,594 +  | 1 |
| GenelD:73660  | Cabp4         | 19 | 4,135,423  | 4,139,609  | 4,186 -   | 1 |
| GenelD:269053 | Gpr152        | 19 | 4,139,799  | 4,145,741  | 5,942 +   | 1 |
| GenelD:23789  | Coro1b        | 19 | 4,148,663  | 4,154,035  | 5,372 +   | 1 |
| GenelD:19265  | Ptprcap       | 19 | 4,154,646  | 4,156,710  | 2,064 +   | 1 |
| GenelD:58988  | Rps6kb2       | 19 | 4,156,977  | 4,163,245  | 6,268 -   | 1 |
| GenelD:108995 | Tbc1d10c      | 19 | 4,184,357  | 4,191,047  | 6,690 -   | 2 |
| GenelD:19045  | Ppp1ca        | 19 | 4,192,174  | 4,195,419  | 3,245 +   | 2 |
| GenelD:19367  | Rad9a         | 19 | 4,195,198  | 4,201,603  | 6,405 -   | 2 |
| GenelD:56708  | Clcf1         | 19 | 4,214,392  | 4,222,615  | 8,223 +   | 1 |
| GenelD:225876 | Kdm2a         | 19 | 4,316,144  | 4,397,077  | 80,933 -  | 1 |
| GenelD:18563  | Pcx           | 19 | 4,510,472  | 4,621,752  | 111,280 + | 4 |
| GenelD:225875 | Lrfn4         | 19 | 4,611,784  | 4,615,667  | 3,883 -   | 3 |
| GenelD:19671  | Rce1          | 19 | 4,622,551  | 4,625,617  | 3,066 -   | 3 |
| GenelD:381196 | Gm960         | 19 | 4,625,841  | 4,698,668  | 72,827 -  | 2 |
| GenelD:20743  | Sptbn2        | 19 | 4,711,223  | 4,752,352  | 41,129 +  | 1 |
| GenelD:66704  | Rbm4b         | 19 | 4,756,525  | 4,765,940  | 9,415 +   | 1 |
| GenelD:11474  | Actn3         | 19 | 4,861,223  | 4,877,884  | 16,661 -  | 1 |
| GenelD:70605  | Zdhhc24       | 19 | 4,878,668  | 4,885,397  | 6,729 +   | 1 |
| GenelD:52028  | Bbs1          | 19 | 4,886,882  | 4,906,627  | 19,745 -  | 1 |
| GenelD:240518 | Peli3         | 19 | 4,931,855  | 4,943,092  | 11,237 -  | 1 |
| GenelD:13340  | Slc29a2       | 19 | 5,024,006  | 5,031,972  | 7,966 +   | 1 |

|                 |               |    |           |           |           |   |
|-----------------|---------------|----|-----------|-----------|-----------|---|
| GenelD:108902   | B3gnt1        | 19 | 5,038,826 | 5,041,134 | 2,308 +   | 1 |
| GenelD:107392   | Brms1         | 19 | 5,041,404 | 5,049,917 | 8,513 +   | 1 |
| GenelD:70445    | Cd248         | 19 | 5,068,078 | 5,070,640 | 2,562 +   | 2 |
| GenelD:381199   | Tmem151a      | 19 | 5,079,337 | 5,085,477 | 6,140 -   | 2 |
| GenelD:12794    | Cnih2         | 19 | 5,092,871 | 5,098,418 | 5,547 -   | 1 |
| GenelD:76308    | Rab1b         | 19 | 5,099,207 | 5,106,996 | 7,789 -   | 1 |
| GenelD:16594    | Klc2          | 19 | 5,107,746 | 5,118,408 | 10,662 -  | 2 |
| GenelD:107975   | Pacs1         | 19 | 5,133,685 | 5,273,119 | 139,434 - | 1 |
| GenelD:319322   | Sf3b2         | 19 | 5,273,921 | 5,295,455 | 21,534 -  | 1 |
| GenelD:545276   | Gal3st3       | 19 | 5,298,331 | 5,308,739 | 10,408 +  | 1 |
| GenelD:23825    | Banf1         | 19 | 5,364,640 | 5,366,645 | 2,005 -   | 1 |
| GenelD:69860    | Eif1ad        | 19 | 5,366,813 | 5,371,511 | 4,698 +   | 1 |
| GenelD:20227    | Sart1         | 19 | 5,377,523 | 5,388,703 | 11,180 -  | 2 |
| GenelD:414115   | D330050I16Rik | 19 | 5,388,336 | 5,390,069 | 1,733 +   | 1 |
| GenelD:78306    | Tsga10ip      | 19 | 5,390,047 | 5,402,460 | 12,413 -  | 1 |
| GenelD:74931    | 4930481A15Rik | 19 | 5,406,874 | 5,422,847 | 15,973 +  | 2 |
| GenelD:66556    | Drap1         | 19 | 5,422,811 | 5,424,916 | 2,105 -   | 2 |
| GenelD:107242   | Al837181      | 19 | 5,425,144 | 5,427,317 | 2,173 +   | 2 |
| GenelD:14283    | Fosl1         | 19 | 5,447,698 | 5,455,938 | 8,240 +   | 2 |
| GenelD:240514   | Ccdc85b       | 19 | 5,453,163 | 5,457,563 | 4,400 -   | 2 |
| GenelD:58249    | Fibp          | 19 | 5,460,607 | 5,465,052 | 4,445 +   | 3 |
| GenelD:13041    | Ctsw          | 19 | 5,465,240 | 5,468,498 | 3,258 -   | 3 |
| GenelD:58859    | Efemp2        | 19 | 5,474,690 | 5,481,854 | 7,164 +   | 3 |
| GenelD:71711    | Mus81         | 19 | 5,482,840 | 5,488,336 | 5,496 -   | 3 |
| GenelD:12631    | Cfl1          | 19 | 5,490,455 | 5,494,031 | 3,576 +   | 2 |
| GenelD:225861   | Snx32         | 19 | 5,495,278 | 5,510,489 | 15,211 -  | 2 |
| GenelD:18426    | Ovol1         | 19 | 5,549,137 | 5,560,575 | 11,438 -  | 2 |
| GenelD:381201   | Ap5b1         | 19 | 5,568,074 | 5,571,261 | 3,187 +   | 2 |
| GenelD:68209    | Rnaseh2c      | 19 | 5,601,873 | 5,602,959 | 1,086 +   | 2 |
| GenelD:81601    | Kat5          | 19 | 5,603,014 | 5,610,094 | 7,080 -   | 2 |
| GenelD:19697    | Rela          | 19 | 5,637,490 | 5,648,130 | 10,640 +  | 1 |
| GenelD:20469    | Sipa1         | 19 | 5,651,185 | 5,663,707 | 12,522 -  | 1 |
| GenelD:104401   | Pcnxl3        | 19 | 5,664,635 | 5,688,908 | 24,273 -  | 4 |
| GenelD:26403    | Map3k11       | 19 | 5,689,131 | 5,702,865 | 13,734 +  | 3 |
| GenelD:114601   | Ehbp1l1       | 19 | 5,707,369 | 5,726,317 | 18,948 -  | 2 |
| GenelD:17826    | Fam89b        | 19 | 5,728,087 | 5,729,666 | 1,579 -   | 2 |
| GenelD:56390    | Sssca1        | 19 | 5,730,306 | 5,731,721 | 1,415 -   | 3 |
| GenelD:10003854 | Gm10815       | 19 | 5,738,405 | 5,740,762 | 2,357 -   | 4 |
| GenelD:16998    | Ltbp3         | 19 | 5,740,904 | 5,758,532 | 17,628 +  | 3 |
| GenelD:78891    | Scyl1         | 19 | 5,758,427 | 5,771,401 | 12,974 -  | 1 |
| GenelD:72289    | Malat1        | 19 | 5,795,690 | 5,802,671 | 6,981 -   | 2 |
| GenelD:104252   | Cdc42ep2      | 19 | 5,917,556 | 5,924,816 | 7,260 -   | 1 |
| GenelD:12333    | Capn1         | 19 | 5,988,545 | 6,015,825 | 27,280 -  | 1 |
| GenelD:10050298 | Gm10814       | 19 | 6,012,620 | 6,018,459 | 5,839 +   | 1 |
| GenelD:666300   | Gm8034        | 19 | 6,044,442 | 6,044,897 | 455 -     | 1 |
| GenelD:74126    | Syvn1         | 19 | 6,046,576 | 6,053,718 | 7,142 +   | 2 |
| GenelD:18120    | Mrpl49        | 19 | 6,053,630 | 6,057,751 | 4,121 -   | 2 |

|                 |               |    |           |           |           |   |
|-----------------|---------------|----|-----------|-----------|-----------|---|
| GenelD:14109    | Fau           | 19 | 6,057,888 | 6,059,524 | 1,636 +   | 2 |
| GenelD:29805    | Znhit2        | 19 | 6,061,207 | 6,062,468 | 1,261 +   | 2 |
| GenelD:73166    | Tm7sf2        | 19 | 6,062,821 | 6,067,850 | 5,029 -   | 2 |
| GenelD:68505    | Vps51         | 19 | 6,067,842 | 6,077,187 | 9,345 -   | 3 |
| GenelD:433215   | BC048609      | 19 | 6,080,038 | 6,080,785 | 747 +     | 2 |
| GenelD:81909    | Zfpl1         | 19 | 6,080,762 | 6,084,891 | 4,129 -   | 2 |
| GenelD:67849    | Cdca5         | 19 | 6,085,097 | 6,091,773 | 6,676 +   | 1 |
| GenelD:56327    | Arl2          | 19 | 6,134,389 | 6,141,137 | 6,748 -   | 1 |
| GenelD:170458   | Gpha2         | 19 | 6,226,401 | 6,227,768 | 1,367 +   | 1 |
| GenelD:225849   | Ppp2r5b       | 19 | 6,227,767 | 6,235,840 | 8,073 -   | 2 |
| GenelD:329015   | Atg2a         | 19 | 6,241,668 | 6,262,304 | 20,636 +  | 2 |
| GenelD:13660    | Ehd1          | 19 | 6,276,896 | 6,300,096 | 23,200 +  | 1 |
| GenelD:240505   | Cdc42bpg      | 19 | 6,306,457 | 6,325,652 | 19,195 +  | 1 |
| GenelD:17283    | Men1          | 19 | 6,334,979 | 6,340,894 | 5,915 +   | 1 |
| GenelD:26412    | Map4k2        | 19 | 6,341,250 | 6,353,527 | 12,277 +  | 1 |
| GenelD:22668    | Sf1           | 19 | 6,363,690 | 6,378,038 | 14,348 +  | 1 |
| GenelD:18190    | Nrxn2         | 19 | 6,418,738 | 6,533,217 | 114,479 + | 1 |
| GenelD:56613    | Rps6ka4       | 19 | 6,829,084 | 6,840,601 | 11,517 -  | 1 |
| GenelD:10062857 | Mir5046       | 19 | 6,829,886 | 6,829,944 | 58 -      | 1 |
| GenelD:78317    | Ccdc88b       | 19 | 6,844,623 | 6,858,211 | 13,588 -  | 1 |
| GenelD:67077    | Tex40         | 19 | 6,922,426 | 6,925,380 | 2,954 -   | 1 |
| GenelD:16528    | Kcnk4         | 19 | 6,925,690 | 6,934,515 | 8,825 -   | 2 |
| GenelD:107173   | Gpr137        | 19 | 6,938,070 | 6,942,450 | 4,380 -   | 3 |
| GenelD:12015    | Bad           | 19 | 6,941,855 | 6,951,893 | 10,038 +  | 3 |
| GenelD:18797    | Plcb3         | 19 | 6,953,713 | 6,969,752 | 16,039 -  | 3 |
| GenelD:18938    | Ppp1r14b      | 19 | 6,975,048 | 6,977,324 | 2,276 +   | 3 |
| GenelD:14227    | Fkbp2         | 19 | 6,977,739 | 6,980,461 | 2,722 -   | 3 |
| GenelD:22340    | Vegfb         | 19 | 6,982,472 | 6,987,651 | 5,179 -   | 3 |
| GenelD:57431    | Dnajc4        | 19 | 6,987,911 | 6,992,272 | 4,361 -   | 1 |
| GenelD:68323    | Nudt22        | 19 | 6,993,019 | 6,996,037 | 3,018 -   | 1 |
| GenelD:107328   | Trpt1         | 19 | 6,996,131 | 6,999,046 | 2,915 +   | 1 |
| GenelD:107227   | Macrod1       | 19 | 7,056,768 | 7,198,062 | 141,294 + | 3 |
| GenelD:107260   | Otub1         | 19 | 7,198,206 | 7,206,284 | 8,078 -   | 1 |
| GenelD:12868    | Cox8a         | 19 | 7,215,158 | 7,217,616 | 2,458 -   | 1 |
| GenelD:70999    | Naa40         | 19 | 7,225,668 | 7,241,222 | 15,554 -  | 1 |
| GenelD:104383   | Rcor2         | 19 | 7,269,765 | 7,275,225 | 5,460 +   | 1 |
| GenelD:13728    | Mark2         | 19 | 7,275,396 | 7,341,844 | 66,448 -  | 2 |
| GenelD:68229    | Al846148      | 19 | 7,356,464 | 7,383,026 | 26,562 -  | 1 |
| GenelD:654802   | 1700105P06Rik | 19 | 7,383,003 | 7,383,561 | 558 +     | 1 |
| GenelD:108899   | 2700081O15Rik | 19 | 7,417,625 | 7,425,904 | 8,279 +   | 3 |
| GenelD:20168    | Rtn3          | 19 | 7,425,901 | 7,483,289 | 57,388 -  | 3 |
| GenelD:17254    | Slc3a2        | 19 | 8,706,882 | 8,723,369 | 16,487 -  | 1 |
| GenelD:83673    | Snhg1         | 19 | 8,723,487 | 8,726,326 | 2,839 +   | 2 |
| GenelD:10012711 | Snord22       | 19 | 8,725,866 | 8,725,991 | 125 +     | 1 |
| GenelD:107071   | Wdr74         | 19 | 8,735,839 | 8,740,624 | 4,785 +   | 2 |
| GenelD:74307    | 1700092M07Rik | 19 | 8,740,718 | 8,741,225 | 507 +     | 2 |
| GenelD:56389    | Stx5a         | 19 | 8,741,424 | 8,755,642 | 14,218 +  | 3 |

|                 |               |    |            |            |           |   |
|-----------------|---------------|----|------------|------------|-----------|---|
| GenelD:53319    | Nxf1          | 19 | 8,757,103  | 8,770,910  | 13,807 +  | 2 |
| GenelD:66836    | Tmem223       | 19 | 8,770,996  | 8,772,475  | 1,479 +   | 1 |
| GenelD:67706    | Tmem179b      | 19 | 8,772,522  | 8,774,467  | 1,945 -   | 1 |
| GenelD:225895   | Taf6l         | 19 | 8,774,354  | 8,786,417  | 12,063 -  | 1 |
| GenelD:67531    | 5730408K05Rik | 19 | 8,888,387  | 8,888,770  | 383 -     | 2 |
| GenelD:10062860 | Mir5136       | 19 | 8,888,699  | 8,888,774  | 75 -      | 2 |
| GenelD:66276    | 1810009A15Rik | 19 | 8,888,903  | 8,890,740  | 1,837 +   | 2 |
| GenelD:109077   | Ints5         | 19 | 8,892,987  | 8,897,890  | 4,903 +   | 2 |
| GenelD:14376    | Ganab         | 19 | 8,898,111  | 8,916,666  | 18,555 +  | 2 |
| GenelD:72727    | B3gat3        | 19 | 8,920,393  | 8,927,236  | 6,843 +   | 1 |
| GenelD:19881    | Rom1          | 19 | 8,927,382  | 8,929,356  | 1,974 -   | 1 |
| GenelD:225898   | Eml3          | 19 | 8,929,694  | 8,941,582  | 11,888 +  | 2 |
| GenelD:23942    | Mta2          | 19 | 8,941,920  | 8,952,300  | 10,380 +  | 1 |
| GenelD:70044    | Tut1          | 19 | 8,953,850  | 8,966,210  | 12,360 +  | 1 |
| GenelD:67160    | Eef1g         | 19 | 8,967,041  | 8,978,180  | 11,139 +  | 1 |
| GenelD:66395    | Ahnak         | 19 | 8,989,284  | 9,076,919  | 87,635 +  | 1 |
| GenelD:16319    | Incenp        | 19 | 9,872,297  | 9,899,533  | 27,236 -  | 1 |
| GenelD:14319    | Fth1          | 19 | 9,982,703  | 9,985,092  | 2,389 +   | 1 |
| GenelD:24115    | Best1         | 19 | 9,985,172  | 10,001,633 | 16,461 -  | 1 |
| GenelD:74760    | Rab3il1       | 19 | 10,018,228 | 10,035,586 | 17,358 +  | 1 |
| GenelD:60527    | Fads3         | 19 | 10,041,548 | 10,059,671 | 18,123 +  | 1 |
| GenelD:56473    | Fads2         | 19 | 10,064,164 | 10,101,503 | 37,339 -  | 1 |
| GenelD:76267    | Fads1         | 19 | 10,182,888 | 10,196,874 | 13,986 +  | 1 |
| GenelD:269060   | Dagla         | 19 | 10,245,265 | 10,304,877 | 59,612 -  | 1 |
| GenelD:54525    | Syt7          | 19 | 10,389,090 | 10,453,181 | 64,091 +  | 1 |
| GenelD:278795   | Lrrc10b       | 19 | 10,455,371 | 10,457,447 | 2,076 -   | 1 |
| GenelD:66072    | Sdhaf2        | 19 | 10,500,512 | 10,525,209 | 24,697 -  | 1 |
| GenelD:269061   | Cpsf7         | 19 | 10,525,244 | 10,547,735 | 22,491 +  | 2 |
| GenelD:68642    | Tmem216       | 19 | 10,550,466 | 10,556,238 | 5,772 -   | 1 |
| GenelD:72982    | Tmem138       | 19 | 10,570,885 | 10,577,097 | 6,212 -   | 1 |
| GenelD:225912   | Cyb561a3      | 19 | 10,577,723 | 10,589,830 | 12,107 +  | 1 |
| GenelD:225913   | Dak           | 19 | 10,592,197 | 10,604,258 | 12,061 -  | 1 |
| GenelD:13194    | Ddb1          | 19 | 10,605,625 | 10,629,822 | 24,197 +  | 1 |
| GenelD:107305   | Vps37c        | 19 | 10,688,815 | 10,714,419 | 25,604 +  | 1 |
| GenelD:68539    | Tmem109       | 19 | 10,870,660 | 10,881,743 | 11,083 -  | 1 |
| GenelD:28000    | Prpf19        | 19 | 10,895,231 | 10,909,559 | 14,328 +  | 1 |
| GenelD:14764    | Gpr44         | 19 | 10,937,160 | 10,942,511 | 5,351 +   | 1 |
| GenelD:108673   | Ccdc86        | 19 | 10,941,481 | 10,949,266 | 7,785 -   | 1 |
| GenelD:207521   | Dtx4          | 19 | 12,466,336 | 12,501,996 | 35,660 -  | 1 |
| GenelD:107373   | Fam111a       | 19 | 12,573,525 | 12,589,696 | 16,171 +  | 1 |
| GenelD:74333    | A330040F15Rik | 19 | 12,585,868 | 12,596,566 | 10,698 -  | 1 |
| GenelD:240549   | Gm4952        | 19 | 12,599,984 | 12,627,616 | 27,632 +  | 1 |
| GenelD:21888    | Tle4          | 19 | 14,448,072 | 14,597,983 | 149,911 - | 2 |
| GenelD:107272   | Psat1         | 19 | 15,905,123 | 15,925,059 | 19,936 -  | 1 |
| GenelD:208518   | Cep78         | 19 | 15,955,773 | 15,984,989 | 29,216 -  | 1 |
| GenelD:10050265 | C130060C02Rik | 19 | 15,985,075 | 16,010,912 | 25,837 +  | 1 |
| GenelD:14682    | Gnaq          | 19 | 16,132,831 | 16,387,453 | 254,622 + | 1 |

|                 |               |    |            |            |           |   |
|-----------------|---------------|----|------------|------------|-----------|---|
| GenelD:14675    | Gna14         | 19 | 16,435,667 | 16,610,818 | 175,151 + | 1 |
| GenelD:271564   | Vps13a        | 19 | 16,615,366 | 16,780,933 | 165,567 - | 1 |
| GenelD:54391    | Rfk           | 19 | 17,394,043 | 17,401,349 | 7,306 +   | 1 |
| GenelD:18552    | Pcsk5         | 19 | 17,432,832 | 17,837,632 | 404,800 - | 1 |
| GenelD:20409    | Ostf1         | 19 | 18,580,364 | 18,631,813 | 51,449 -  | 1 |
| GenelD:225994   | Nmrk1         | 19 | 18,632,016 | 18,652,191 | 20,175 +  | 1 |
| GenelD:67383    | 2410127L17Rik | 19 | 18,670,780 | 18,704,792 | 34,012 +  | 2 |
| GenelD:225995   | D030056L22Rik | 19 | 18,713,236 | 18,718,428 | 5,192 +   | 1 |
| GenelD:10105624 | LOC101056249  | 19 | 21,271,125 | 21,272,971 | 1,846 -   | 1 |
| GenelD:22682    | Zfand5        | 19 | 21,272,278 | 21,286,840 | 14,562 +  | 1 |
| GenelD:66206    | 1110059E24Rik | 19 | 21,597,313 | 21,652,791 | 55,478 -  | 1 |
| GenelD:226016   | Abhd17b       | 19 | 21,653,309 | 21,685,637 | 32,328 +  | 1 |
| GenelD:83921    | Tmem2         | 19 | 21,778,342 | 21,858,327 | 79,985 +  | 1 |
| GenelD:16601    | Klf9          | 19 | 23,141,226 | 23,166,911 | 25,685 +  | 1 |
| GenelD:10031667 | Mir1192       | 19 | 23,149,431 | 23,149,551 | 120 +     | 1 |
| GenelD:226026   | Smc5          | 19 | 23,206,441 | 23,273,897 | 67,456 -  | 1 |
| GenelD:72351    | Ptar1         | 19 | 23,687,400 | 23,721,129 | 33,729 +  | 1 |
| GenelD:319924   | Apba1         | 19 | 23,758,876 | 23,949,597 | 190,721 + | 2 |
| GenelD:18719    | Pip5k1b       | 19 | 24,294,796 | 24,555,827 | 261,031 - | 2 |
| GenelD:68034    | Fam122a       | 19 | 24,475,779 | 24,477,474 | 1,695 -   | 1 |
| GenelD:107351   | Kank1         | 19 | 25,237,202 | 25,434,496 | 197,294 + | 1 |
| GenelD:50796    | Dmrt1         | 19 | 25,505,706 | 25,604,328 | 98,622 +  | 2 |
| GenelD:240590   | Dmrt3         | 19 | 25,610,537 | 25,623,921 | 13,384 +  | 1 |
| GenelD:67155    | Smarca2       | 19 | 26,605,160 | 26,778,321 | 173,161 + | 1 |
| GenelD:19726    | Rfx3          | 19 | 27,761,721 | 28,011,166 | 249,445 - | 1 |
| GenelD:226075   | Glis3         | 19 | 28,262,448 | 28,680,077 | 417,629 - | 1 |
| GenelD:320176   | D930032P07Rik | 19 | 28,678,224 | 28,720,027 | 41,803 +  | 1 |
| GenelD:67072    | Cdc37l1       | 19 | 28,990,494 | 29,017,569 | 27,075 +  | 1 |
| GenelD:59028    | Rcl1          | 19 | 29,101,375 | 29,143,843 | 42,468 +  | 1 |
| GenelD:77779    | A930007I19Rik | 19 | 29,503,663 | 29,521,987 | 18,324 -  | 1 |
| GenelD:226089   | C030046E11Rik | 19 | 29,522,282 | 29,605,921 | 83,639 +  | 1 |
| GenelD:240613   | 9930021J03Rik | 19 | 29,714,402 | 29,806,009 | 91,607 -  | 1 |
| GenelD:240614   | Ranbp6        | 19 | 29,808,108 | 29,812,974 | 4,866 -   | 1 |
| GenelD:109113   | Uhrf2         | 19 | 30,030,513 | 30,093,726 | 63,213 +  | 1 |
| GenelD:208449   | Sgms1         | 19 | 32,122,727 | 32,388,454 | 265,727 - | 2 |
| GenelD:67188    | 2700046G09Rik | 19 | 32,389,216 | 32,391,184 | 1,968 +   | 2 |
| GenelD:17330    | Minpp1        | 19 | 32,485,769 | 32,515,370 | 29,601 +  | 1 |
| GenelD:67979    | Atad1         | 19 | 32,672,563 | 32,712,298 | 39,735 -  | 1 |
| GenelD:19211    | Pten          | 19 | 32,757,577 | 32,826,160 | 68,583 +  | 1 |
| GenelD:76630    | Stambpl1      | 19 | 34,192,270 | 34,240,328 | 48,058 +  | 1 |
| GenelD:75735    | Pank1         | 19 | 34,810,894 | 34,879,455 | 68,561 -  | 1 |
| GenelD:226098   | Hectd2        | 19 | 36,554,639 | 36,621,135 | 66,496 +  | 1 |
| GenelD:74493    | Tnks2         | 19 | 36,834,232 | 36,893,477 | 59,245 +  | 1 |
| GenelD:72514    | Fgfbp3        | 19 | 36,917,550 | 36,919,599 | 2,049 -   | 2 |
| GenelD:107182   | Btaf1         | 19 | 36,926,079 | 37,014,057 | 87,978 +  | 2 |
| GenelD:208922   | Cpeb3         | 19 | 37,021,291 | 37,207,293 | 186,002 - | 2 |
| GenelD:319931   | A330032B11Rik | 19 | 37,173,843 | 37,196,541 | 22,698 +  | 1 |

|               |               |    |            |            |           |   |
|---------------|---------------|----|------------|------------|-----------|---|
| GenelD:69104  | March5        | 19 | 37,207,545 | 37,224,457 | 16,912 +  | 1 |
| GenelD:16551  | Kif11         | 19 | 37,376,403 | 37,421,859 | 45,456 +  | 1 |
| GenelD:107371 | Exoc6         | 19 | 37,550,418 | 37,683,253 | 132,835 + | 1 |
| GenelD:619304 | I830134H01Rik | 19 | 38,051,774 | 38,054,528 | 2,754 -   | 1 |
| GenelD:74107  | Cep55         | 19 | 38,055,025 | 38,074,425 | 19,400 +  | 1 |
| GenelD:209478 | Tbc1d12       | 19 | 38,836,579 | 38,919,923 | 83,344 +  | 1 |
| GenelD:15201  | Hells         | 19 | 38,930,990 | 38,968,277 | 37,287 +  | 1 |
| GenelD:668310 | Cc2d2b        | 19 | 40,765,434 | 40,827,358 | 61,924 +  | 1 |
| GenelD:240665 | Ccnj          | 19 | 40,831,279 | 40,848,572 | 17,293 +  | 1 |
| GenelD:72672  | Zfp518a       | 19 | 40,894,705 | 40,917,947 | 23,242 +  | 1 |
| GenelD:107358 | Tm9sf3        | 19 | 41,210,842 | 41,264,004 | 53,162 -  | 1 |
| GenelD:83490  | Pik3ap1       | 19 | 41,274,218 | 41,385,070 | 110,852 - | 1 |
| GenelD:14296  | Frat1         | 19 | 41,829,970 | 41,832,583 | 2,613 +   | 1 |
| GenelD:212398 | Frat2         | 19 | 41,845,972 | 41,848,132 | 2,160 -   | 1 |
| GenelD:107094 | Rrp12         | 19 | 41,862,851 | 41,896,153 | 33,302 -  | 1 |
| GenelD:18648  | Pgam1         | 19 | 41,911,871 | 41,918,665 | 6,794 +   | 1 |
| GenelD:66583  | Exosc1        | 19 | 41,922,980 | 41,933,314 | 10,334 -  | 1 |
| GenelD:74168  | Zdhhc16       | 19 | 41,933,472 | 41,944,103 | 10,631 +  | 1 |
| GenelD:72199  | Mms19         | 19 | 41,943,707 | 41,981,136 | 37,429 -  | 2 |
| GenelD:226122 | Ubt1          | 19 | 41,981,763 | 42,034,641 | 52,878 +  | 1 |
| GenelD:277010 | Marveld1      | 19 | 42,147,389 | 42,151,703 | 4,314 +   | 1 |
| GenelD:71146  | Golga7b       | 19 | 42,247,578 | 42,270,348 | 22,770 +  | 1 |
| GenelD:52013  | R3hcc1l       | 19 | 42,518,805 | 42,592,256 | 73,451 +  | 1 |
| GenelD:18089  | Nkx2-3        | 19 | 43,612,325 | 43,615,892 | 3,567 +   | 1 |
| GenelD:93685  | Entpd7        | 19 | 43,689,689 | 43,733,853 | 44,164 +  | 1 |
| GenelD:226139 | Cox15         | 19 | 43,733,254 | 43,753,000 | 19,746 -  | 1 |
| GenelD:66388  | Cutc          | 19 | 43,753,023 | 43,768,638 | 15,615 +  | 1 |
| GenelD:71972  | Dnmbp         | 19 | 43,846,819 | 43,940,198 | 93,379 -  | 2 |
| GenelD:226144 | Erlin1        | 19 | 44,034,943 | 44,069,785 | 34,842 -  | 1 |
| GenelD:12675  | Chuk          | 19 | 44,073,334 | 44,107,477 | 34,143 -  | 2 |
| GenelD:72502  | Cwf19l1       | 19 | 44,108,637 | 44,135,876 | 27,239 -  | 1 |
| GenelD:18504  | Pax2          | 19 | 44,757,394 | 44,837,871 | 80,477 +  | 2 |
| GenelD:73322  | 1700039E22Rik | 19 | 44,828,493 | 44,835,938 | 7,445 -   | 1 |
| GenelD:226151 | Fam178a       | 19 | 44,931,119 | 44,983,787 | 52,668 +  | 1 |
| GenelD:26456  | Sema4g        | 19 | 44,989,344 | 45,003,395 | 14,051 +  | 1 |
| GenelD:94067  | Mrpl43        | 19 | 45,005,014 | 45,006,442 | 1,428 -   | 2 |
| GenelD:226153 | Peo1          | 19 | 45,006,558 | 45,012,762 | 6,204 +   | 2 |
| GenelD:226154 | Lzts2         | 19 | 45,015,176 | 45,027,104 | 11,928 +  | 2 |
| GenelD:107250 | Kazald1       | 19 | 45,076,139 | 45,079,289 | 3,150 +   | 4 |
| GenelD:16814  | Lbx1          | 19 | 45,233,728 | 45,235,236 | 1,508 -   | 1 |
| GenelD:30838  | Fbxw4         | 19 | 45,578,257 | 45,660,193 | 81,936 -  | 1 |
| GenelD:14179  | Fgf8          | 19 | 45,736,798 | 45,742,884 | 6,086 -   | 2 |
| GenelD:18150  | Npm3          | 19 | 45,747,734 | 45,749,563 | 1,829 -   | 2 |
| GenelD:76055  | Mgea5         | 19 | 45,750,259 | 45,783,291 | 33,032 -  | 3 |
| GenelD:80906  | Kcnp2         | 19 | 45,793,670 | 45,815,803 | 22,133 -  | 1 |
| GenelD:71617  | 9130011E15Rik | 19 | 45,818,144 | 45,998,488 | 180,344 - | 1 |
| GenelD:20170  | Hps6          | 19 | 46,003,478 | 46,006,173 | 2,695 +   | 1 |

|                 |               |    |            |            |           |   |
|-----------------|---------------|----|------------|------------|-----------|---|
| GenelD:16825    | Ldb1          | 19 | 46,032,594 | 46,045,211 | 12,617 -  | 1 |
| GenelD:226169   | Pprc1         | 19 | 46,056,539 | 46,072,909 | 16,370 +  | 2 |
| GenelD:70769    | Nolc1         | 19 | 46,075,863 | 46,085,530 | 9,667 +   | 1 |
| GenelD:12686    | Elov13        | 19 | 46,131,899 | 46,135,694 | 3,795 +   | 1 |
| GenelD:18742    | Pitx3         | 19 | 46,135,685 | 46,148,325 | 12,640 -  | 2 |
| GenelD:107338   | Gbf1          | 19 | 46,152,558 | 46,286,510 | 133,952 + | 1 |
| GenelD:10050339 | 4833438C02Rik | 19 | 46,303,585 | 46,305,629 | 2,044 -   | 2 |
| GenelD:18034    | Nfkb2         | 19 | 46,304,737 | 46,312,090 | 7,353 +   | 2 |
| GenelD:73728    | Psd           | 19 | 46,312,087 | 46,327,156 | 15,069 -  | 3 |
| GenelD:68431    | Fbxl15        | 19 | 46,328,184 | 46,330,446 | 2,262 +   | 1 |
| GenelD:67116    | Cuedc2        | 19 | 46,329,812 | 46,338,660 | 8,848 -   | 2 |
| GenelD:751550   | Mir146b       | 19 | 46,342,762 | 46,342,870 | 108 +     | 1 |
| GenelD:75579    | 2310034G01Rik | 19 | 46,348,201 | 46,348,988 | 787 -     | 1 |
| GenelD:75146    | Tmem180       | 19 | 46,356,880 | 46,375,254 | 18,374 +  | 1 |
| GenelD:93679    | Trim8         | 19 | 46,501,648 | 46,516,455 | 14,807 +  | 2 |
| GenelD:56350    | Arl3          | 19 | 46,531,109 | 46,573,085 | 41,976 -  | 1 |
| GenelD:94279    | Sfxn2         | 19 | 46,573,365 | 46,596,901 | 23,536 +  | 1 |
| GenelD:76952    | Nt5c2         | 19 | 46,886,831 | 47,015,189 | 128,358 - | 1 |
| GenelD:226180   | Ina           | 19 | 47,014,698 | 47,024,358 | 9,660 +   | 1 |
| GenelD:226182   | Taf5          | 19 | 47,067,748 | 47,083,479 | 15,731 +  | 1 |
| GenelD:629389   | Gm6970        | 19 | 47,170,469 | 47,171,130 | 661 -     | 1 |
| GenelD:18011    | Neurl1a       | 19 | 47,178,820 | 47,259,441 | 80,621 +  | 2 |
| GenelD:14218    | Sh3pxd2a      | 19 | 47,260,174 | 47,464,411 | 204,237 - | 1 |
| GenelD:67788    | Sfr1          | 19 | 47,731,756 | 47,735,588 | 3,832 +   | 1 |
| GenelD:10004853 | Wdr96         | 19 | 47,736,857 | 47,837,361 | 100,504 - | 1 |
| GenelD:14873    | Gsto1         | 19 | 47,854,989 | 47,864,790 | 9,801 +   | 1 |
| GenelD:68214    | Gsto2         | 19 | 47,865,545 | 47,886,305 | 20,760 +  | 1 |
| GenelD:414801   | Itrip1        | 19 | 47,894,596 | 47,919,299 | 24,703 -  | 1 |
| GenelD:170750   | Xpnpep1       | 19 | 52,991,183 | 53,038,542 | 47,359 -  | 1 |
| GenelD:27360    | Add3          | 19 | 53,140,445 | 53,247,399 | 106,954 + | 1 |
| GenelD:17859    | Mxi1          | 19 | 53,310,506 | 53,375,810 | 65,304 +  | 2 |
| GenelD:76479    | Smndc1        | 19 | 53,379,214 | 53,390,573 | 11,359 -  | 1 |
| GenelD:240672   | Dusp5         | 19 | 53,529,318 | 53,541,322 | 12,004 +  | 1 |
| GenelD:13006    | Smc3          | 19 | 53,600,396 | 53,645,831 | 45,435 +  | 1 |
| GenelD:73713    | Rbm20         | 19 | 53,677,306 | 53,867,080 | 189,774 + | 1 |
| GenelD:18569    | Pdcd4         | 19 | 53,892,231 | 53,929,861 | 37,630 +  | 1 |
| GenelD:10050359 | Gm19788       | 19 | 53,893,830 | 53,896,554 | 2,724 +   | 1 |
| GenelD:11551    | Adra2a        | 19 | 54,045,182 | 54,048,982 | 3,800 +   | 1 |
| GenelD:14732    | Gpam          | 19 | 55,069,734 | 55,099,447 | 29,713 -  | 1 |
| GenelD:66980    | Zdhhc6        | 19 | 55,298,296 | 55,316,032 | 17,736 -  | 1 |
| GenelD:53611    | Vti1a         | 19 | 55,316,351 | 55,626,561 | 310,210 + | 1 |
| GenelD:21416    | Tcf7l2        | 19 | 55,741,810 | 55,933,655 | 191,845 + | 2 |
| GenelD:55947    | Dclre1a       | 19 | 56,529,161 | 56,548,222 | 19,061 -  | 1 |
| GenelD:66866    | Nhlrc2        | 19 | 56,548,261 | 56,598,846 | 50,585 +  | 1 |
| GenelD:213993   | A630007B06Rik | 19 | 56,790,963 | 56,813,683 | 22,720 -  | 1 |
| GenelD:83561    | Tdrd1         | 19 | 56,826,209 | 56,870,012 | 43,803 +  | 1 |
| GenelD:226250   | Afap1l2       | 19 | 56,912,354 | 57,008,575 | 96,221 -  | 1 |



|                 |               |    |            |            |           |   |
|-----------------|---------------|----|------------|------------|-----------|---|
| GenelD:320879   | B230217O12Rik | 19 | 57,323,197 | 57,360,899 | 37,702 -  | 1 |
| GenelD:226252   | Fam160b1      | 19 | 57,361,009 | 57,389,594 | 28,585 +  | 1 |
| GenelD:226255   | Atrnl1        | 19 | 57,611,034 | 58,133,343 | 522,309 + | 1 |
| GenelD:73442    | Hspa12a       | 19 | 58,795,751 | 58,860,984 | 65,233 -  | 1 |
| GenelD:107368   | Pdzd8         | 19 | 59,296,084 | 59,345,780 | 49,696 -  | 1 |
| GenelD:329078   | Emx2os        | 19 | 59,425,104 | 59,458,635 | 33,531 -  | 2 |
| GenelD:13797    | Emx2          | 19 | 59,458,690 | 59,465,357 | 6,667 +   | 2 |
| GenelD:74998    | Rab11fip2     | 19 | 59,902,884 | 59,943,654 | 40,770 -  | 1 |
| GenelD:74963    | 4930470F04Rik | 19 | 59,943,625 | 59,944,658 | 1,033 +   | 1 |
| GenelD:76539    | D19Ertd737e   | 19 | 60,198,586 | 60,226,697 | 28,111 -  | 1 |
| GenelD:226278   | Prlhr         | 19 | 60,466,733 | 60,468,304 | 1,571 -   | 1 |
| GenelD:78832    | Cacul1        | 19 | 60,524,696 | 60,581,023 | 56,327 -  | 1 |
| GenelD:332397   | Nanos1        | 19 | 60,755,987 | 60,759,914 | 3,927 +   | 1 |
| GenelD:13669    | Eif3a         | 19 | 60,761,116 | 60,790,693 | 29,577 -  | 2 |
| GenelD:269233   | Fam171a1      | 2  | 3,118,388  | 3,227,809  | 109,421 + | 1 |
| GenelD:18108    | Nmt2          | 2  | 3,284,288  | 3,326,369  | 42,081 +  | 1 |
| GenelD:64707    | Suv39h2       | 2  | 3,455,815  | 3,474,986  | 19,171 -  | 1 |
| GenelD:50497    | Hspa14        | 2  | 3,488,854  | 3,512,814  | 23,960 -  | 1 |
| GenelD:10086194 | LOC100861945  | 2  | 3,506,804  | 3,509,102  | 2,298 -   | 1 |
| GenelD:227526   | Cdnf          | 2  | 3,513,065  | 3,526,376  | 13,311 +  | 1 |
| GenelD:227541   | Camk1d        | 2  | 5,293,457  | 5,714,664  | 421,207 - | 1 |
| GenelD:209361   | Taf3          | 2  | 9,914,552  | 10,048,609 | 134,057 - | 1 |
| GenelD:11949    | Atp5c1        | 2  | 10,056,030 | 10,080,510 | 24,480 -  | 2 |
| GenelD:16588    | Kin           | 2  | 10,080,612 | 10,092,701 | 12,089 +  | 1 |
| GenelD:170768   | Pfkfb3        | 2  | 11,471,430 | 11,553,929 | 82,499 -  | 2 |
| GenelD:76938    | Rbm17         | 2  | 11,585,439 | 11,603,199 | 17,760 -  | 1 |
| GenelD:50755    | Fbxo18        | 2  | 11,742,573 | 11,777,527 | 34,954 -  | 1 |
| GenelD:320816   | Ankrd16       | 2  | 11,777,753 | 11,790,325 | 12,572 +  | 1 |
| GenelD:22352    | Vim           | 2  | 13,574,311 | 13,582,826 | 8,515 +   | 1 |
| GenelD:241230   | St8sia6       | 2  | 13,654,934 | 13,793,520 | 138,586 - | 1 |
| GenelD:30963    | Ptpla         | 2  | 14,026,831 | 14,056,035 | 29,204 -  | 1 |
| GenelD:70957    | 4921530L18Rik | 2  | 14,070,333 | 14,073,934 | 3,601 -   | 1 |
| GenelD:20844    | Stam          | 2  | 14,074,112 | 14,148,338 | 74,226 +  | 1 |
| GenelD:12296    | Cacnb2        | 2  | 14,604,306 | 14,987,908 | 383,602 + | 1 |
| GenelD:74455    | Nsun6         | 2  | 14,995,131 | 15,054,872 | 59,741 -  | 1 |
| GenelD:75869    | Arl5b         | 2  | 15,055,362 | 15,079,191 | 23,829 +  | 1 |
| GenelD:67448    | Plxdc2        | 2  | 16,356,322 | 16,752,115 | 395,793 + | 1 |
| GenelD:77940    | A930004D18Rik | 2  | 18,025,187 | 18,037,741 | 12,554 -  | 4 |
| GenelD:10003473 | Gm17762       | 2  | 18,027,249 | 18,030,577 | 3,328 +   | 3 |
| GenelD:72668    | Skida1        | 2  | 18,044,087 | 18,048,449 | 4,362 -   | 2 |
| GenelD:17354    | Mllt10        | 2  | 18,055,237 | 18,212,390 | 157,153 + | 2 |
| GenelD:10105596 | LOC101055966  | 2  | 18,063,038 | 18,064,815 | 1,777 -   | 1 |
| GenelD:13418    | Dnajc1        | 2  | 18,206,333 | 18,392,830 | 186,497 - | 1 |
| GenelD:12238    | Commd3        | 2  | 18,672,462 | 18,676,216 | 3,754 +   | 1 |
| GenelD:12151    | Bmi1          | 2  | 18,677,018 | 18,686,629 | 9,611 +   | 3 |
| GenelD:10105597 | LOC101055977  | 2  | 18,687,516 | 18,690,731 | 3,215 -   | 2 |
| GenelD:381350   | BC061194      | 2  | 18,699,022 | 18,749,605 | 50,583 +  | 2 |

|                 |               |   |            |            |           |   |
|-----------------|---------------|---|------------|------------|-----------|---|
| GenelD:10004147 | Gm3363        | 2 | 18,766,485 | 18,767,455 | 970 -     | 1 |
| GenelD:18718    | Pip4k2a       | 2 | 18,842,256 | 18,998,121 | 155,865 - | 1 |
| GenelD:74629    | 4930426L09Rik | 2 | 18,998,319 | 18,999,804 | 1,485 +   | 1 |
| GenelD:10004124 | Gm3230        | 2 | 19,655,806 | 19,657,897 | 2,091 -   | 1 |
| GenelD:71198    | Otud1         | 2 | 19,658,062 | 19,660,590 | 2,528 +   | 1 |
| GenelD:71435    | Arhgap21      | 2 | 20,847,919 | 20,967,721 | 119,802 - | 2 |
| GenelD:433408   | Gm13375       | 2 | 20,968,874 | 20,970,348 | 1,474 +   | 2 |
| GenelD:11308    | Abi1          | 2 | 22,939,989 | 23,040,240 | 100,251 - | 1 |
| GenelD:77683    | Ehmt1         | 2 | 24,790,773 | 24,919,590 | 128,817 - | 1 |
| GenelD:215705   | Arrdc1        | 2 | 24,925,352 | 24,935,281 | 9,929 -   | 1 |
| GenelD:67187    | Zmynd19       | 2 | 24,949,802 | 24,959,413 | 9,611 +   | 1 |
| GenelD:67228    | Wdr85         | 2 | 24,962,422 | 24,973,471 | 11,049 +  | 1 |
| GenelD:107733   | Mrpl41        | 2 | 24,972,470 | 24,975,098 | 2,628 -   | 1 |
| GenelD:241274   | Pnpla7        | 2 | 24,976,033 | 25,054,072 | 78,039 +  | 2 |
| GenelD:56876    | Nsmf          | 2 | 25,054,379 | 25,062,881 | 8,502 +   | 1 |
| GenelD:67122    | Nrap          | 2 | 25,180,758 | 25,183,339 | 2,581 +   | 1 |
| GenelD:78797    | Ndor1         | 2 | 25,244,813 | 25,255,414 | 10,601 -  | 2 |
| GenelD:227615   | Tmem203       | 2 | 25,255,439 | 25,256,352 | 913 +     | 2 |
| GenelD:97031    | Tprn          | 2 | 25,262,598 | 25,269,886 | 7,288 +   | 3 |
| GenelD:68475    | Ssna1         | 2 | 25,271,039 | 25,272,418 | 1,379 -   | 2 |
| GenelD:99152    | Anapc2        | 2 | 25,272,466 | 25,285,916 | 13,450 +  | 2 |
| GenelD:83768    | Dpp7          | 2 | 25,352,290 | 25,356,332 | 4,042 -   | 1 |
| GenelD:227620   | Uap1l1        | 2 | 25,361,492 | 25,365,626 | 4,134 -   | 2 |
| GenelD:72080    | Sapcd2        | 2 | 25,372,321 | 25,378,213 | 5,892 +   | 2 |
| GenelD:12496    | Entpd2        | 2 | 25,395,874 | 25,401,323 | 5,449 +   | 2 |
| GenelD:18146    | Npdc1         | 2 | 25,403,083 | 25,409,494 | 6,411 +   | 2 |
| GenelD:77701    | Lcn12         | 2 | 25,490,845 | 25,493,911 | 3,066 -   | 1 |
| GenelD:69379    | C8g           | 2 | 25,498,656 | 25,500,506 | 1,850 -   | 1 |
| GenelD:30839    | Fbxw5         | 2 | 25,500,778 | 25,505,470 | 4,692 +   | 1 |
| GenelD:22030    | Traf2         | 2 | 25,517,982 | 25,546,894 | 28,912 -  | 1 |
| GenelD:59022    | Edf1          | 2 | 25,557,900 | 25,562,082 | 4,182 +   | 1 |
| GenelD:381352   | Mamdc4        | 2 | 25,563,115 | 25,571,316 | 8,201 -   | 2 |
| GenelD:75454    | Phpt1         | 2 | 25,573,431 | 25,574,871 | 1,440 -   | 1 |
| GenelD:381353   | Gm996         | 2 | 25,575,416 | 25,580,099 | 4,683 -   | 1 |
| GenelD:227624   | Rabl6         | 2 | 25,583,018 | 25,608,446 | 25,428 -  | 2 |
| GenelD:77058    | 4921530D09Rik | 2 | 25,608,629 | 25,617,678 | 9,049 -   | 1 |
| GenelD:227634   | Camsap1       | 2 | 25,926,838 | 25,983,282 | 56,444 -  | 1 |
| GenelD:109299   | C330006A16Rik | 2 | 26,136,807 | 26,140,506 | 3,699 -   | 1 |
| GenelD:227638   | Qsox2         | 2 | 26,209,130 | 26,237,420 | 28,290 -  | 1 |
| GenelD:77481    | C030048H21Rik | 2 | 26,243,463 | 26,247,414 | 3,951 -   | 1 |
| GenelD:67839    | Gpsm1         | 2 | 26,315,533 | 26,348,237 | 32,704 +  | 2 |
| GenelD:52838    | Dnlz          | 2 | 26,348,118 | 26,352,110 | 3,992 -   | 1 |
| GenelD:332579   | Card9         | 2 | 26,352,312 | 26,359,547 | 7,235 -   | 1 |
| GenelD:227644   | Snpc4         | 2 | 26,362,765 | 26,380,653 | 17,888 -  | 2 |
| GenelD:68112    | Sdccag3       | 2 | 26,382,800 | 26,389,316 | 6,516 -   | 1 |
| GenelD:66865    | Pmpca         | 2 | 26,389,348 | 26,397,121 | 7,773 +   | 1 |
| GenelD:64436    | Inpp5e        | 2 | 26,396,249 | 26,409,188 | 12,939 -  | 1 |

|                 |               |   |            |            |           |   |
|-----------------|---------------|---|------------|------------|-----------|---|
| GenelD:227648   | Sec16a        | 2 | 26,409,431 | 26,445,216 | 35,785 -  | 1 |
| GenelD:10012592 | 0610009E02Rik | 2 | 26,445,696 | 26,459,417 | 13,721 +  | 1 |
| GenelD:18128    | Notch1        | 2 | 26,457,902 | 26,503,822 | 45,920 -  | 1 |
| GenelD:67512    | Agpat2        | 2 | 26,593,587 | 26,604,210 | 10,623 -  | 1 |
| GenelD:56279    | Fam69b        | 2 | 26,628,457 | 26,636,497 | 8,040 +   | 2 |
| GenelD:72091    | Snhg7         | 2 | 26,637,176 | 26,640,244 | 3,068 -   | 2 |
| GenelD:10030695 | Snora43       | 2 | 26,637,847 | 26,637,985 | 138 -     | 2 |
| GenelD:10030695 | Snora17       | 2 | 26,639,190 | 26,639,321 | 131 -     | 2 |
| GenelD:329369   | 5730588L14Rik | 2 | 26,640,372 | 26,645,944 | 5,572 +   | 1 |
| GenelD:10003944 | Gm2240        | 2 | 26,646,594 | 26,651,820 | 5,226 +   | 1 |
| GenelD:20935    | Surf6         | 2 | 26,890,772 | 26,902,813 | 12,041 -  | 1 |
| GenelD:20933    | Med22         | 2 | 26,905,267 | 26,910,642 | 5,375 -   | 1 |
| GenelD:27176    | Rpl7a         | 2 | 26,910,807 | 26,913,311 | 2,504 +   | 1 |
| GenelD:20930    | Surf1         | 2 | 26,913,378 | 26,916,530 | 3,152 -   | 1 |
| GenelD:20931    | Surf2         | 2 | 26,916,421 | 26,920,172 | 3,751 +   | 1 |
| GenelD:20932    | Surf4         | 2 | 26,920,041 | 26,933,511 | 13,470 -  | 2 |
| GenelD:279029   | Gm711         | 2 | 26,934,069 | 26,953,496 | 19,427 +  | 1 |
| GenelD:279028   | Adamts13      | 2 | 26,973,416 | 27,009,625 | 36,209 +  | 1 |
| GenelD:381356   | Cacfd1        | 2 | 27,009,926 | 27,021,089 | 11,163 +  | 1 |
| GenelD:22325    | Vav2          | 2 | 27,263,635 | 27,426,825 | 163,190 - | 1 |
| GenelD:67382    | Brd3          | 2 | 27,445,581 | 27,475,673 | 30,092 -  | 1 |
| GenelD:140858   | Wdr5          | 2 | 27,515,147 | 27,536,535 | 21,388 +  | 1 |
| GenelD:20181    | Rxra          | 2 | 27,677,201 | 27,763,319 | 86,118 +  | 2 |
| GenelD:12831    | Col5a1        | 2 | 27,886,425 | 28,039,510 | 153,085 + | 2 |
| GenelD:69327    | 1700007K13Rik | 2 | 28,462,001 | 28,466,324 | 4,323 -   | 1 |
| GenelD:118451   | Mrps2         | 2 | 28,468,066 | 28,471,177 | 3,111 +   | 1 |
| GenelD:227671   | Gbgt1         | 2 | 28,496,891 | 28,505,415 | 8,524 +   | 1 |
| GenelD:19730    | Ralgds        | 2 | 28,513,167 | 28,553,082 | 39,915 +  | 1 |
| GenelD:64930    | Tsc1          | 2 | 28,641,243 | 28,691,167 | 49,924 +  | 1 |
| GenelD:269252   | Gtf3c4        | 2 | 28,822,299 | 28,840,360 | 18,061 -  | 1 |
| GenelD:227674   | Ddx31         | 2 | 28,840,406 | 28,905,575 | 65,169 +  | 1 |
| GenelD:54422    | Barhl1        | 2 | 28,907,680 | 28,916,440 | 8,760 -   | 1 |
| GenelD:329375   | 1700101E01Rik | 2 | 28,955,481 | 29,055,066 | 99,585 -  | 2 |
| GenelD:22130    | Ttf1          | 2 | 29,060,263 | 29,087,650 | 27,387 +  | 2 |
| GenelD:171171   | Ntng2         | 2 | 29,194,821 | 29,248,040 | 53,219 -  | 1 |
| GenelD:76220    | 6530402F18Rik | 2 | 29,245,116 | 29,252,993 | 7,877 -   | 1 |
| GenelD:68975    | Med27         | 2 | 29,346,836 | 29,524,788 | 177,952 + | 1 |
| GenelD:70319    | 2600006K01Rik | 2 | 29,868,726 | 29,869,785 | 1,059 -   | 1 |
| GenelD:99151    | Cercam        | 2 | 29,869,494 | 29,882,840 | 13,346 +  | 2 |
| GenelD:18286    | Odf2          | 2 | 29,889,720 | 29,931,746 | 42,026 +  | 2 |
| GenelD:74412    | Gle1          | 2 | 29,935,409 | 29,959,432 | 24,023 +  | 2 |
| GenelD:20740    | Sptan1        | 2 | 29,965,560 | 30,031,451 | 65,891 +  | 1 |
| GenelD:71820    | Wdr34         | 2 | 30,031,551 | 30,048,879 | 17,328 -  | 1 |
| GenelD:56086    | Set           | 2 | 30,061,996 | 30,072,577 | 10,581 +  | 3 |
| GenelD:263803   | Pkn3          | 2 | 30,078,766 | 30,091,019 | 12,253 +  | 1 |
| GenelD:67350    | 1700084E18Rik | 2 | 30,237,197 | 30,237,631 | 434 -     | 1 |
| GenelD:241296   | Lrrc8a        | 2 | 30,237,769 | 30,263,790 | 26,021 +  | 1 |

|                 |               |   |            |            |           |   |
|-----------------|---------------|---|------------|------------|-----------|---|
| GenelD:227696   | Phyhhd1       | 2 | 30,266,529 | 30,282,149 | 15,620 +  | 1 |
| GenelD:227697   | Dolk          | 2 | 30,284,229 | 30,286,354 | 2,125 -   | 1 |
| GenelD:227699   | Nup188        | 2 | 30,286,433 | 30,344,262 | 57,829 +  | 1 |
| GenelD:12908    | Crat          | 2 | 30,400,476 | 30,415,748 | 15,272 -  | 1 |
| GenelD:110854   | Ppp2r4        | 2 | 30,416,050 | 30,447,807 | 31,757 +  | 1 |
| GenelD:72500    | Ier5l         | 2 | 30,472,631 | 30,474,199 | 1,568 -   | 2 |
| GenelD:665635   | Gm14486       | 2 | 30,658,164 | 30,669,902 | 11,738 -  | 1 |
| GenelD:10003870 | Gm14488       | 2 | 30,713,150 | 30,717,043 | 3,893 -   | 1 |
| GenelD:10052649 | Mir3089       | 2 | 30,721,210 | 30,721,293 | 83 +      | 1 |
| GenelD:10105574 | LOC101055740  | 2 | 30,772,644 | 30,783,406 | 10,762 +  | 1 |
| GenelD:30934    | Tor1b         | 2 | 30,953,001 | 30,959,015 | 6,014 +   | 2 |
| GenelD:30931    | Tor1a         | 2 | 30,960,561 | 30,967,918 | 7,357 -   | 2 |
| GenelD:227707   | BC005624      | 2 | 30,972,833 | 30,981,941 | 9,108 -   | 1 |
| GenelD:14269    | Fnbp1         | 2 | 31,026,206 | 31,142,008 | 115,802 - | 2 |
| GenelD:320973   | D330023K18Rik | 2 | 31,151,049 | 31,152,291 | 1,242 -   | 2 |
| GenelD:277463   | Gpr107        | 2 | 31,152,316 | 31,216,567 | 64,251 +  | 2 |
| GenelD:14299    | Ncs1          | 2 | 31,245,923 | 31,295,472 | 49,549 +  | 1 |
| GenelD:665700   | Hmcn2         | 2 | 31,314,415 | 31,460,738 | 146,323 + | 2 |
| GenelD:11898    | Ass1          | 2 | 31,470,270 | 31,520,670 | 50,400 +  | 1 |
| GenelD:320267   | Fubp3         | 2 | 31,572,725 | 31,617,519 | 44,794 +  | 1 |
| GenelD:227715   | Exosc2        | 2 | 31,670,737 | 31,681,320 | 10,583 +  | 1 |
| GenelD:11350    | Abl1          | 2 | 31,688,556 | 31,804,227 | 115,671 + | 1 |
| GenelD:241303   | Fam78a        | 2 | 32,066,885 | 32,083,705 | 16,820 -  | 1 |
| GenelD:227723   | Prrc2b        | 2 | 32,151,148 | 32,234,537 | 83,389 +  | 1 |
| GenelD:13429    | Dnm1          | 2 | 32,308,471 | 32,353,304 | 44,833 -  | 2 |
| GenelD:68379    | Ciz1          | 2 | 32,363,010 | 32,378,313 | 15,303 +  | 3 |
| GenelD:73737    | 1110008P14Rik | 2 | 32,379,101 | 32,381,915 | 2,814 -   | 1 |
| GenelD:16819    | Lcn2          | 2 | 32,384,637 | 32,387,739 | 3,102 -   | 1 |
| GenelD:98952    | Fam102a       | 2 | 32,535,359 | 32,569,750 | 34,391 +  | 1 |
| GenelD:20448    | St6galnac4    | 2 | 32,587,490 | 32,600,482 | 12,992 +  | 1 |
| GenelD:50935    | St6galnac6    | 2 | 32,599,709 | 32,620,804 | 21,095 +  | 1 |
| GenelD:13805    | Eng           | 2 | 32,646,595 | 32,682,669 | 36,074 +  | 1 |
| GenelD:14287    | Fpgs          | 2 | 32,682,609 | 32,694,175 | 11,566 -  | 2 |
| GenelD:107951   | Cdk9          | 2 | 32,705,782 | 32,712,784 | 7,002 -   | 2 |
| GenelD:10049951 | Mir2861       | 2 | 32,712,807 | 32,712,888 | 81 -      | 2 |
| GenelD:10062860 | Mir3960       | 2 | 32,712,900 | 32,712,972 | 72 -      | 2 |
| GenelD:27387    | Sh2d3c        | 2 | 32,721,055 | 32,755,007 | 33,952 +  | 2 |
| GenelD:30933    | Tor2a         | 2 | 32,757,234 | 32,762,244 | 5,010 +   | 1 |
| GenelD:338348   | Ttc16         | 2 | 32,762,177 | 32,775,383 | 13,206 -  | 1 |
| GenelD:20910    | Stxbp1        | 2 | 32,787,607 | 32,847,237 | 59,630 -  | 1 |
| GenelD:227737   | Fam129b       | 2 | 32,876,134 | 32,925,253 | 49,119 +  | 1 |
| GenelD:227738   | Lrsam1        | 2 | 32,925,215 | 32,961,255 | 36,040 -  | 1 |
| GenelD:269261   | Rpl12         | 2 | 32,961,712 | 32,964,045 | 2,333 +   | 1 |
| GenelD:104367   | Snora65       | 2 | 32,963,301 | 32,963,418 | 117 +     | 1 |
| GenelD:56017    | Slc2a8        | 2 | 32,972,989 | 32,982,056 | 9,067 -   | 2 |
| GenelD:99326    | Garnl3        | 2 | 32,986,366 | 33,087,204 | 100,838 - | 1 |
| GenelD:241311   | Zbtb34        | 2 | 33,406,108 | 33,431,324 | 25,216 -  | 1 |

|                 |               |   |            |            |           |   |
|-----------------|---------------|---|------------|------------|-----------|---|
| GenelD:71834    | Zbtb43        | 2 | 33,450,287 | 33,468,532 | 18,245 -  | 1 |
| GenelD:72543    | Mvb12b        | 2 | 33,729,956 | 33,887,946 | 157,990 - | 2 |
| GenelD:18516    | Pbx3          | 2 | 34,171,909 | 34,372,036 | 200,127 - | 2 |
| GenelD:30050    | Fbxw2         | 2 | 34,804,364 | 34,826,235 | 21,871 -  | 1 |
| GenelD:66998    | Psmc5         | 2 | 34,852,089 | 34,870,962 | 18,873 -  | 1 |
| GenelD:77996    | D730039F16Rik | 2 | 34,874,436 | 34,892,133 | 17,697 +  | 1 |
| GenelD:68365    | Rab14         | 2 | 35,180,205 | 35,201,120 | 20,915 -  | 1 |
| GenelD:69601    | Dab2ip        | 2 | 35,558,458 | 35,730,994 | 172,536 + | 2 |
| GenelD:74410    | Ttll11        | 2 | 35,751,240 | 35,979,624 | 228,384 - | 1 |
| GenelD:68375    | Ndufa8        | 2 | 36,036,334 | 36,049,292 | 12,958 -  | 1 |
| GenelD:75495    | Morn5         | 2 | 36,049,473 | 36,079,709 | 30,236 +  | 1 |
| GenelD:319817   | Rc3h2         | 2 | 37,370,069 | 37,422,903 | 52,834 -  | 1 |
| GenelD:241322   | Zbtb6         | 2 | 37,425,500 | 37,430,919 | 5,419 -   | 1 |
| GenelD:320633   | Zbtb26        | 2 | 37,432,168 | 37,443,121 | 10,953 -  | 2 |
| GenelD:227800   | Rabgap1       | 2 | 37,443,285 | 37,566,437 | 123,152 + | 1 |
| GenelD:227801   | Dennd1a       | 2 | 37,798,990 | 38,287,384 | 488,394 - | 1 |
| GenelD:59126    | Nek6          | 2 | 38,511,697 | 38,587,490 | 75,793 +  | 1 |
| GenelD:26423    | Nr5a1         | 2 | 38,692,660 | 38,714,542 | 21,882 -  | 1 |
| GenelD:14536    | Nr6a1         | 2 | 38,723,374 | 38,926,461 | 203,087 - | 2 |
| GenelD:241327   | Olfml2a       | 2 | 38,931,980 | 38,960,585 | 28,605 +  | 2 |
| GenelD:76646    | Wdr38         | 2 | 38,998,309 | 39,001,584 | 3,275 +   | 2 |
| GenelD:66489    | Rpl35         | 2 | 39,001,581 | 39,005,131 | 3,550 -   | 2 |
| GenelD:74192    | Arpc5l        | 2 | 39,008,139 | 39,015,872 | 7,733 +   | 2 |
| GenelD:76899    | Golga1        | 2 | 39,016,503 | 39,065,406 | 48,903 -  | 2 |
| GenelD:320271   | Scai          | 2 | 39,066,214 | 39,190,730 | 124,516 - | 2 |
| GenelD:67857    | Ppp6c         | 2 | 39,196,798 | 39,226,338 | 29,540 -  | 2 |
| GenelD:11480    | Acvr2a        | 2 | 48,814,109 | 48,903,264 | 89,155 +  | 1 |
| GenelD:227867   | Epc2          | 2 | 49,451,486 | 49,551,609 | 100,123 + | 1 |
| GenelD:16574    | Kif5c         | 2 | 49,619,314 | 49,774,778 | 155,464 + | 1 |
| GenelD:320343   | Lypd6         | 2 | 50,066,429 | 50,193,569 | 127,140 + | 1 |
| GenelD:109129   | Mmadhc        | 2 | 50,279,881 | 50,296,677 | 16,796 -  | 1 |
| GenelD:10050262 | Gm13483       | 2 | 50,296,810 | 50,433,967 | 137,157 + | 1 |
| GenelD:74194    | Rnd3          | 2 | 51,130,439 | 51,149,111 | 18,672 -  | 1 |
| GenelD:51869    | Rif1          | 2 | 52,072,837 | 52,122,381 | 49,544 +  | 1 |
| GenelD:75423    | Arl5a         | 2 | 52,397,951 | 52,424,874 | 26,923 -  | 1 |
| GenelD:414078   | A430018G15Rik | 2 | 52,424,978 | 52,434,890 | 9,912 +   | 1 |
| GenelD:12298    | Cacnb4        | 2 | 52,428,320 | 52,676,582 | 248,262 - | 2 |
| GenelD:56324    | Stam2         | 2 | 52,692,206 | 52,742,149 | 49,943 -  | 1 |
| GenelD:71409    | Fmnl2         | 2 | 52,857,868 | 53,134,202 | 276,334 + | 1 |
| GenelD:56194    | Prpf40a       | 2 | 53,138,475 | 53,191,187 | 52,712 -  | 1 |
| GenelD:65103    | Arl6ip6       | 2 | 53,192,084 | 53,219,221 | 27,137 +  | 1 |
| GenelD:18227    | Nr4a2         | 2 | 57,107,226 | 57,124,003 | 16,777 -  | 2 |
| GenelD:767815   | BB557941      | 2 | 57,127,477 | 57,181,754 | 54,277 -  | 1 |
| GenelD:227923   | A930012O16Rik | 2 | 57,236,227 | 57,238,502 | 2,275 -   | 1 |
| GenelD:14571    | Gpd2          | 2 | 57,237,678 | 57,370,719 | 133,041 + | 1 |
| GenelD:269275   | Acvr1c        | 2 | 58,267,453 | 58,357,758 | 90,305 -  | 1 |
| GenelD:11477    | Acvr1         | 2 | 58,446,438 | 58,566,828 | 120,390 - | 1 |

|                 |               |   |            |            |           |   |
|-----------------|---------------|---|------------|------------|-----------|---|
| GenelD:227937   | Pkp4          | 2 | 59,160,850 | 59,355,205 | 194,355 + | 1 |
| GenelD:66860    | Tanc1         | 2 | 59,612,044 | 59,846,149 | 234,105 + | 1 |
| GenelD:72137    | Wdsub1        | 2 | 59,852,364 | 59,882,606 | 30,242 -  | 1 |
| GenelD:407823   | Baz2b         | 2 | 59,899,363 | 60,125,740 | 226,377 - | 1 |
| GenelD:10050517 | LOC100505179  | 2 | 60,206,593 | 60,209,364 | 2,771 -   | 1 |
| GenelD:57438    | March7        | 2 | 60,209,936 | 60,248,385 | 38,449 +  | 1 |
| GenelD:56878    | Rbms1         | 2 | 60,751,953 | 60,963,204 | 211,251 - | 2 |
| GenelD:10003849 | Gm13582       | 2 | 60,964,376 | 60,975,151 | 10,775 -  | 1 |
| GenelD:21353    | Tank          | 2 | 61,578,586 | 61,654,171 | 75,585 +  | 1 |
| GenelD:59029    | Psmc14        | 2 | 61,711,694 | 61,800,376 | 88,682 +  | 1 |
| GenelD:21375    | Tbr1          | 2 | 61,804,453 | 61,814,114 | 9,661 +   | 1 |
| GenelD:319876   | Cobll1        | 2 | 65,088,339 | 65,238,626 | 150,287 - | 1 |
| GenelD:14425    | Galnt3        | 2 | 66,082,766 | 66,124,793 | 42,027 -  | 1 |
| GenelD:53416    | Stk39         | 2 | 68,210,447 | 68,471,981 | 261,534 - | 1 |
| GenelD:241447   | Cers6         | 2 | 68,861,557 | 69,111,290 | 249,733 + | 1 |
| GenelD:14725    | Lrp2          | 2 | 69,424,335 | 69,586,067 | 161,732 - | 1 |
| GenelD:72569    | Bbs5          | 2 | 69,647,255 | 69,667,569 | 20,314 +  | 1 |
| GenelD:320720   | Fastkd1       | 2 | 69,686,820 | 69,712,606 | 25,786 -  | 1 |
| GenelD:228005   | Ppig          | 2 | 69,723,088 | 69,754,059 | 30,971 +  | 1 |
| GenelD:73373    | Phospho2      | 2 | 69,789,737 | 69,797,168 | 7,431 +   | 1 |
| GenelD:20823    | Ssb           | 2 | 69,861,562 | 69,871,846 | 10,284 +  | 1 |
| GenelD:75422    | Mettl5        | 2 | 69,871,195 | 69,885,604 | 14,409 -  | 1 |
| GenelD:10032914 | 4930550G17Rik | 2 | 69,885,679 | 69,888,162 | 2,483 +   | 1 |
| GenelD:68795    | Ubr3          | 2 | 69,897,246 | 70,024,013 | 126,767 + | 1 |
| GenelD:70231    | Gorasp2       | 2 | 70,661,509 | 70,691,725 | 30,216 +  | 1 |
| GenelD:228012   | Tlk1          | 2 | 70,712,407 | 70,825,480 | 113,073 - | 1 |
| GenelD:228019   | Mettl8        | 2 | 70,964,561 | 71,055,606 | 91,045 -  | 1 |
| GenelD:75763    | Dcaf17        | 2 | 71,055,744 | 71,099,142 | 43,398 +  | 1 |
| GenelD:13427    | Dync1i2       | 2 | 71,211,706 | 71,263,303 | 51,597 +  | 1 |
| GenelD:107435   | Hat1          | 2 | 71,389,260 | 71,441,622 | 52,362 +  | 1 |
| GenelD:66559    | Metap1d       | 2 | 71,453,338 | 71,525,191 | 71,853 +  | 1 |
| GenelD:16403    | Itga6         | 2 | 71,787,083 | 71,856,758 | 69,675 +  | 1 |
| GenelD:228026   | Pdk1          | 2 | 71,873,272 | 71,903,858 | 30,586 +  | 1 |
| GenelD:65964    | B230120H23Rik | 2 | 72,285,637 | 72,442,610 | 156,973 + | 1 |
| GenelD:66953    | Cdca7         | 2 | 72,476,219 | 72,486,890 | 10,671 +  | 1 |
| GenelD:20687    | Sp3           | 2 | 72,936,430 | 72,980,446 | 44,016 -  | 2 |
| GenelD:10050384 | 1700011J10Rik | 2 | 72,979,432 | 72,989,249 | 9,817 +   | 2 |
| GenelD:67059    | Ola1          | 2 | 73,092,801 | 73,214,447 | 121,646 - | 1 |
| GenelD:381373   | Sp9           | 2 | 73,271,926 | 73,275,771 | 3,845 +   | 1 |
| GenelD:66935    | Cir1          | 2 | 73,283,872 | 73,312,592 | 28,720 -  | 1 |
| GenelD:108699   | Chn1          | 2 | 73,610,660 | 73,775,346 | 164,686 - | 1 |
| GenelD:10003853 | Gm10822       | 2 | 73,892,996 | 73,900,850 | 7,854 +   | 1 |
| GenelD:228033   | Atp5g3        | 2 | 73,908,450 | 73,911,294 | 2,844 -   | 1 |
| GenelD:69605    | Lnp           | 2 | 74,514,837 | 74,578,948 | 64,111 -  | 1 |
| GenelD:14029    | Evx2          | 2 | 74,655,616 | 74,659,419 | 3,803 -   | 2 |
| GenelD:15433    | Hoxd13        | 2 | 74,668,310 | 74,671,599 | 3,289 +   | 2 |
| GenelD:15432    | Hoxd12        | 2 | 74,675,013 | 74,677,705 | 2,692 +   | 1 |

|                 |               |   |            |            |           |   |
|-----------------|---------------|---|------------|------------|-----------|---|
| GenelD:15431    | Hoxd11        | 2 | 74,679,558 | 74,687,016 | 7,458 +   | 1 |
| GenelD:15430    | Hoxd10        | 2 | 74,691,891 | 74,695,106 | 3,215 +   | 2 |
| GenelD:15438    | Hoxd9         | 2 | 74,697,763 | 74,700,208 | 2,445 +   | 2 |
| GenelD:15437    | Hoxd8         | 2 | 74,705,489 | 74,707,307 | 1,818 +   | 1 |
| GenelD:73429    | 1700109F18Rik | 2 | 74,710,044 | 74,716,130 | 6,086 -   | 1 |
| GenelD:15434    | Hoxd3         | 2 | 74,711,993 | 74,748,271 | 36,278 +  | 2 |
| GenelD:15436    | Hoxd4         | 2 | 74,721,978 | 74,729,160 | 7,182 +   | 1 |
| GenelD:387144   | Mir10b        | 2 | 74,726,070 | 74,726,137 | 67 +      | 1 |
| GenelD:399588   | 6720416L17Rik | 2 | 74,748,334 | 74,750,500 | 2,166 -   | 1 |
| GenelD:15429    | Hoxd1         | 2 | 74,762,980 | 74,765,142 | 2,162 +   | 1 |
| GenelD:53375    | Mtx2          | 2 | 74,825,812 | 74,876,748 | 50,936 +  | 1 |
| GenelD:229279   | Hnrnpa3       | 2 | 75,659,259 | 75,669,407 | 10,148 +  | 1 |
| GenelD:18024    | Nfe2l2        | 2 | 75,675,519 | 75,704,641 | 29,122 -  | 1 |
| GenelD:320474   | E030042O20Rik | 2 | 75,704,735 | 75,710,025 | 5,290 +   | 1 |
| GenelD:13067    | Cyct          | 2 | 76,353,943 | 76,360,448 | 6,505 -   | 1 |
| GenelD:241490   | Rbm45         | 2 | 76,369,984 | 76,383,768 | 13,784 +  | 1 |
| GenelD:99031    | Osbpl6        | 2 | 76,406,538 | 76,600,647 | 194,109 + | 1 |
| GenelD:70599    | Ssfa2         | 2 | 79,635,425 | 79,672,966 | 37,541 +  | 1 |
| GenelD:66861    | Dnajc10       | 2 | 80,315,466 | 80,354,055 | 38,589 +  | 1 |
| GenelD:50884    | Nckap1        | 2 | 80,501,295 | 80,580,965 | 79,670 -  | 1 |
| GenelD:68082    | Dusp19        | 2 | 80,617,214 | 80,631,661 | 14,447 +  | 1 |
| GenelD:672381   | Gm13690       | 2 | 80,628,683 | 80,629,638 | 955 -     | 1 |
| GenelD:735274   | Mir684-1      | 2 | 80,628,705 | 80,628,790 | 85 -      | 1 |
| GenelD:69482    | Nup35         | 2 | 80,638,812 | 80,660,071 | 21,259 +  | 1 |
| GenelD:69082    | Zc3h15        | 2 | 83,644,578 | 83,664,617 | 20,039 +  | 1 |
| GenelD:16410    | Itgav         | 2 | 83,724,397 | 83,806,916 | 82,519 +  | 1 |
| GenelD:228136   | Zdhhc5        | 2 | 84,687,920 | 84,715,164 | 27,244 -  | 1 |
| GenelD:98985    | Clp1          | 2 | 84,723,122 | 84,727,268 | 4,146 -   | 1 |
| GenelD:241525   | Ypel4         | 2 | 84,734,204 | 84,737,877 | 3,673 +   | 1 |
| GenelD:387149   | Mir130a       | 2 | 84,741,115 | 84,741,178 | 63 -      | 1 |
| GenelD:10050287 | Gm19426       | 2 | 84,742,169 | 84,743,655 | 1,486 -   | 1 |
| GenelD:30059    | Timm10        | 2 | 84,827,021 | 84,830,213 | 3,192 +   | 1 |
| GenelD:72401    | Slc43a1       | 2 | 84,839,408 | 84,863,586 | 24,178 +  | 1 |
| GenelD:269295   | Rtn4rl2       | 2 | 84,871,946 | 84,886,692 | 14,746 -  | 1 |
| GenelD:228139   | P2rx3         | 2 | 84,996,552 | 85,035,834 | 39,282 -  | 1 |
| GenelD:10086234 | LOC100862344  | 2 | 85,030,204 | 85,033,586 | 3,382 -   | 1 |
| GenelD:20833    | Ssrp1         | 2 | 85,037,201 | 85,047,111 | 9,910 +   | 2 |
| GenelD:228140   | Tnks1bp1      | 2 | 85,050,460 | 85,073,048 | 22,588 +  | 1 |
| GenelD:67445    | C1qtnf4       | 2 | 90,885,786 | 90,890,526 | 4,740 +   | 1 |
| GenelD:68349    | Ndufs3        | 2 | 90,894,636 | 90,904,721 | 10,085 -  | 2 |
| GenelD:67136    | Kbtbd4        | 2 | 90,904,786 | 90,910,560 | 5,774 +   | 2 |
| GenelD:66461    | Ptpmt1        | 2 | 90,910,713 | 90,918,050 | 7,337 -   | 2 |
| GenelD:13046    | Celf1         | 2 | 90,940,397 | 91,019,497 | 79,100 +  | 1 |
| GenelD:68427    | Slc39a13      | 2 | 91,061,791 | 91,070,221 | 8,430 -   | 1 |
| GenelD:228355   | Madd          | 2 | 91,137,360 | 91,183,047 | 45,687 -  | 1 |
| GenelD:22259    | Nr1h3         | 2 | 91,184,061 | 91,195,116 | 11,055 -  | 1 |
| GenelD:228357   | Lrp4          | 2 | 91,457,531 | 91,513,901 | 56,370 +  | 1 |

|                 |               |   |             |             |           |   |
|-----------------|---------------|---|-------------|-------------|-----------|---|
| GenelD:619941   | Gm13770       | 2 | 91,523,573  | 91,523,884  | 311 -     | 1 |
| GenelD:51897    | Atg13         | 2 | 91,674,612  | 91,710,592  | 35,980 -  | 1 |
| GenelD:241547   | Harbi1        | 2 | 91,710,950  | 91,721,566  | 10,616 +  | 2 |
| GenelD:228361   | Ambra1        | 2 | 91,730,138  | 91,918,849  | 188,711 + | 2 |
| GenelD:12672    | Chrm4         | 2 | 91,922,189  | 91,929,829  | 7,640 +   | 2 |
| GenelD:17242    | Mdk           | 2 | 91,929,821  | 91,932,282  | 2,461 -   | 2 |
| GenelD:104418   | Dgkz          | 2 | 91,932,822  | 91,963,563  | 30,741 -  | 1 |
| GenelD:26427    | Creb3l1       | 2 | 91,982,328  | 92,024,170  | 41,842 -  | 1 |
| GenelD:192285   | Phf21a        | 2 | 92,184,182  | 92,364,666  | 180,484 + | 1 |
| GenelD:228366   | Gylt1b        | 2 | 92,365,046  | 92,371,036  | 5,990 -   | 1 |
| GenelD:18633    | Pex16         | 2 | 92,374,676  | 92,381,220  | 6,544 +   | 1 |
| GenelD:12953    | Cry2          | 2 | 92,403,646  | 92,434,069  | 30,423 -  | 1 |
| GenelD:320507   | D930015M05Rik | 2 | 92,408,892  | 92,432,308  | 23,416 +  | 1 |
| GenelD:228368   | Slc35c1       | 2 | 92,452,764  | 92,460,518  | 7,754 -   | 1 |
| GenelD:277414   | Trp53i11      | 2 | 93,187,584  | 93,201,757  | 14,173 +  | 1 |
| GenelD:241556   | Tspan18       | 2 | 93,201,760  | 93,334,487  | 132,727 - | 1 |
| GenelD:620695   | Gm13889       | 2 | 93,955,810  | 93,957,100  | 1,290 -   | 1 |
| GenelD:74569    | Ttc17         | 2 | 94,300,766  | 94,406,689  | 105,923 - | 1 |
| GenelD:66457    | 2810002D19Rik | 2 | 94,406,707  | 94,411,682  | 4,975 +   | 1 |
| GenelD:11800    | Api5          | 2 | 94,411,727  | 94,438,147  | 26,420 -  | 2 |
| GenelD:22034    | Traf6         | 2 | 101,678,440 | 101,700,976 | 22,536 +  | 1 |
| GenelD:80985    | Trim44        | 2 | 102,300,119 | 102,400,900 | 100,781 - | 1 |
| GenelD:14221    | Fjx1          | 2 | 102,449,366 | 102,451,792 | 2,426 -   | 1 |
| GenelD:99382    | Abtb2         | 2 | 103,566,310 | 103,718,423 | 152,113 + | 1 |
| GenelD:98956    | Nat10         | 2 | 103,721,259 | 103,761,250 | 39,991 -  | 1 |
| GenelD:53872    | Caprin1       | 2 | 103,762,945 | 103,797,640 | 34,695 -  | 3 |
| GenelD:78031    | 4930547E08Rik | 2 | 103,804,452 | 103,810,622 | 6,170 -   | 2 |
| GenelD:241589   | D430041D05Rik | 2 | 104,143,073 | 104,410,334 | 267,261 - | 1 |
| GenelD:15259    | Hipk3         | 2 | 104,426,481 | 104,494,489 | 68,008 -  | 1 |
| GenelD:228410   | Cstf3         | 2 | 104,590,484 | 104,665,425 | 74,941 +  | 1 |
| GenelD:99003    | Qser1         | 2 | 104,754,795 | 104,816,696 | 61,901 -  | 1 |
| GenelD:71928    | 2310047K21Rik | 2 | 104,810,764 | 104,818,683 | 7,919 +   | 1 |
| GenelD:98221    | Eif3m         | 2 | 104,999,656 | 105,017,027 | 17,371 -  | 1 |
| GenelD:329480   | Al314831      | 2 | 105,076,538 | 105,126,510 | 49,972 -  | 3 |
| GenelD:22431    | Wt1           | 2 | 105,126,529 | 105,173,614 | 47,085 +  | 3 |
| GenelD:19672    | Rcn1          | 2 | 105,385,948 | 105,399,319 | 13,371 -  | 1 |
| GenelD:12064    | Bdnf          | 2 | 109,674,700 | 109,727,043 | 52,343 +  | 1 |
| GenelD:10003845 | Gm13939       | 2 | 109,902,396 | 109,913,319 | 10,923 -  | 1 |
| GenelD:107515   | Lgr4          | 2 | 109,917,647 | 110,014,257 | 96,610 +  | 1 |
| GenelD:213765   | Nutm1         | 2 | 112,247,948 | 112,259,291 | 11,343 -  | 1 |
| GenelD:66181    | Nop10         | 2 | 112,261,969 | 112,262,898 | 929 +     | 1 |
| GenelD:107723   | Slc12a6       | 2 | 112,266,314 | 112,363,163 | 96,849 +  | 1 |
| GenelD:320870   | E330013P08Rik | 2 | 112,268,981 | 112,272,586 | 3,605 +   | 1 |
| GenelD:72425    | Katnbl1       | 2 | 112,379,211 | 112,414,237 | 35,026 +  | 1 |
| GenelD:23892    | Grem1         | 2 | 113,748,675 | 113,758,648 | 9,973 -   | 2 |
| GenelD:17536    | Meis2         | 2 | 115,861,264 | 116,065,058 | 203,794 - | 1 |
| GenelD:72603    | 2700033N17Rik | 2 | 116,066,216 | 116,067,444 | 1,228 -   | 1 |



|                 |               |   |             |             |           |   |
|-----------------|---------------|---|-------------|-------------|-----------|---|
| GenelD:114715   | Spred1        | 2 | 117,121,450 | 117,179,337 | 57,887 +  | 1 |
| GenelD:68215    | Fam98b        | 2 | 117,249,739 | 117,271,540 | 21,801 +  | 1 |
| GenelD:27103    | Eif2ak4       | 2 | 118,388,617 | 118,475,234 | 86,617 +  | 2 |
| GenelD:20813    | Srp14         | 2 | 118,475,843 | 118,479,696 | 3,853 -   | 1 |
| GenelD:12236    | Bub1b         | 2 | 118,598,211 | 118,641,592 | 43,381 +  | 1 |
| GenelD:214230   | Pak6          | 2 | 118,663,577 | 118,698,020 | 34,443 +  | 3 |
| GenelD:383787   | Ankrd63       | 2 | 118,699,103 | 118,703,963 | 4,860 -   | 2 |
| GenelD:18796    | Plcb2         | 2 | 118,707,517 | 118,728,438 | 20,921 -  | 1 |
| GenelD:10004327 | 5430417L22Rik | 2 | 118,745,762 | 118,748,807 | 3,045 +   | 1 |
| GenelD:214239   | A430105I19Rik | 2 | 118,754,145 | 118,762,661 | 8,516 -   | 2 |
| GenelD:228536   | Bahd1         | 2 | 118,901,615 | 118,924,524 | 22,909 +  | 1 |
| GenelD:269336   | Ccdc32        | 2 | 119,017,779 | 119,029,393 | 11,614 -  | 1 |
| GenelD:271842   | Rpusd2        | 2 | 119,034,790 | 119,042,198 | 7,408 +   | 2 |
| GenelD:76464    | Casc5         | 2 | 119,047,119 | 119,104,121 | 57,002 +  | 2 |
| GenelD:19361    | Rad51         | 2 | 119,112,817 | 119,136,070 | 23,253 +  | 1 |
| GenelD:67809    | Rmdn3         | 2 | 119,136,998 | 119,157,034 | 20,036 -  | 1 |
| GenelD:320415   | Gchfr         | 2 | 119,167,788 | 119,172,389 | 4,601 +   | 1 |
| GenelD:69408    | Dnajc17       | 2 | 119,172,500 | 119,208,795 | 36,295 -  | 1 |
| GenelD:623781   | Gm14137       | 2 | 119,174,509 | 119,177,575 | 3,066 +   | 1 |
| GenelD:72112    | Ppp1r14d      | 2 | 119,218,123 | 119,229,865 | 11,742 -  | 1 |
| GenelD:20732    | Spint1        | 2 | 119,237,360 | 119,249,514 | 12,154 +  | 1 |
| GenelD:10004360 | Gm14207       | 2 | 119,321,199 | 119,326,197 | 4,998 -   | 1 |
| GenelD:54485    | Dll4          | 2 | 119,325,784 | 119,335,666 | 9,882 +   | 1 |
| GenelD:68142    | Ino80         | 2 | 119,373,042 | 119,477,629 | 104,587 - | 1 |
| GenelD:56398    | Chp1          | 2 | 119,547,707 | 119,587,024 | 39,317 +  | 1 |
| GenelD:66602    | 1700020I14Rik | 2 | 119,594,296 | 119,600,746 | 6,450 +   | 1 |
| GenelD:625328   | H3f3c         | 2 | 119,665,491 | 119,666,152 | 661 -     | 1 |
| GenelD:76246    | Rtf1          | 2 | 119,675,068 | 119,735,407 | 60,339 +  | 3 |
| GenelD:228550   | Itpka         | 2 | 119,742,337 | 119,751,253 | 8,916 +   | 2 |
| GenelD:17005    | Ltk           | 2 | 119,751,326 | 119,760,431 | 9,105 -   | 2 |
| GenelD:22174    | Tyro3         | 2 | 119,799,514 | 119,818,104 | 18,590 +  | 2 |
| GenelD:70715    | 6330405D24Rik | 2 | 119,870,361 | 119,878,403 | 8,042 -   | 1 |
| GenelD:29808    | Mga           | 2 | 119,897,228 | 119,969,581 | 72,353 +  | 1 |
| GenelD:20402    | Zfp106        | 2 | 120,506,830 | 120,563,831 | 57,001 -  | 1 |
| GenelD:20619    | Snap23        | 2 | 120,567,671 | 120,600,722 | 33,051 +  | 1 |
| GenelD:68968    | Cdan1         | 2 | 120,716,154 | 120,731,517 | 15,363 -  | 1 |
| GenelD:140810   | Ttbk2         | 2 | 120,732,816 | 120,850,584 | 117,768 - | 2 |
| GenelD:10050270 | AV039307      | 2 | 120,850,656 | 120,866,690 | 16,034 +  | 1 |
| GenelD:22222    | Ubr1          | 2 | 120,860,272 | 120,970,715 | 110,443 - | 1 |
| GenelD:329504   | Lcmt2         | 2 | 121,137,292 | 121,140,698 | 3,406 -   | 1 |
| GenelD:75894    | Adal          | 2 | 121,142,141 | 121,156,678 | 14,537 +  | 1 |
| GenelD:99334    | Zscan29       | 2 | 121,157,427 | 121,171,149 | 13,722 -  | 1 |
| GenelD:51885    | Tubgcp4       | 2 | 121,171,206 | 121,197,118 | 25,912 +  | 1 |
| GenelD:212670   | Catsper2      | 2 | 121,394,355 | 121,413,792 | 19,437 -  | 1 |
| GenelD:14827    | Pdia3         | 2 | 121,413,902 | 121,438,687 | 24,785 +  | 1 |
| GenelD:269344   | Ell3          | 2 | 121,439,027 | 121,442,601 | 3,574 -   | 1 |
| GenelD:378702   | Serf2         | 2 | 121,449,228 | 121,453,426 | 4,198 +   | 1 |

|                 |           |   |             |             |           |   |
|-----------------|-----------|---|-------------|-------------|-----------|---|
| GenelD:574418   | Serinc4   | 2 | 121,451,177 | 121,456,764 | 5,587 -   | 1 |
| GenelD:67693    | Hypk      | 2 | 121,457,088 | 121,458,440 | 1,352 +   | 1 |
| GenelD:319996   | Casc4     | 2 | 121,866,970 | 121,936,220 | 69,250 +  | 1 |
| GenelD:17147    | Mageb3    | 2 | 121,953,771 | 121,956,092 | 2,321 -   | 1 |
| GenelD:329506   | Ctdspl2   | 2 | 121,956,453 | 122,013,586 | 57,133 +  | 1 |
| GenelD:78655    | Eif3j1    | 2 | 122,028,623 | 122,053,629 | 25,006 +  | 1 |
| GenelD:214585   | Spg11     | 2 | 122,053,526 | 122,118,386 | 64,860 -  | 1 |
| GenelD:67578    | Patl2     | 2 | 122,120,108 | 122,186,189 | 66,081 -  | 1 |
| GenelD:99439    | Duox1     | 2 | 122,315,672 | 122,347,972 | 32,300 +  | 1 |
| GenelD:435684   | Shf       | 2 | 122,348,892 | 122,368,918 | 20,026 -  | 1 |
| GenelD:214616   | Spata5l1  | 2 | 122,630,625 | 122,636,477 | 5,852 +   | 1 |
| GenelD:433470   | AA467197  | 2 | 122,637,887 | 122,641,076 | 3,189 +   | 1 |
| GenelD:387165   | Mir147    | 2 | 122,640,803 | 122,640,881 | 78 +      | 1 |
| GenelD:22785    | Slc30a4   | 2 | 122,681,239 | 122,702,663 | 21,424 -  | 1 |
| GenelD:18457    | Bloc1s6   | 2 | 122,738,505 | 122,749,487 | 10,982 +  | 1 |
| GenelD:214968   | Sema6d    | 2 | 124,610,296 | 124,667,770 | 57,474 +  | 1 |
| GenelD:110074   | Dut       | 2 | 125,247,248 | 125,259,049 | 11,801 +  | 1 |
| GenelD:14118    | Fbn1      | 2 | 125,300,594 | 125,506,438 | 205,844 - | 2 |
| GenelD:70354    | Secisbp2l | 2 | 125,736,986 | 125,782,870 | 45,884 -  | 1 |
| GenelD:12848    | Cops2     | 2 | 125,830,304 | 125,859,018 | 28,714 -  | 1 |
| GenelD:69976    | Galk2     | 2 | 125,859,218 | 125,984,298 | 125,080 + | 1 |
| GenelD:75823    | Fam227b   | 2 | 125,983,628 | 126,146,251 | 162,623 - | 1 |
| GenelD:69185    | Dtwd1     | 2 | 126,152,141 | 126,165,277 | 13,136 +  | 1 |
| GenelD:26458    | Slc27a2   | 2 | 126,553,024 | 126,588,243 | 35,219 +  | 1 |
| GenelD:14391    | Gabpb1    | 2 | 126,628,913 | 126,675,487 | 46,574 -  | 1 |
| GenelD:58800    | Trpm7     | 2 | 126,791,558 | 126,876,261 | 84,703 -  | 1 |
| GenelD:320632   | Snrnp200  | 2 | 127,208,404 | 127,240,451 | 32,047 +  | 1 |
| GenelD:26371    | Ciao1     | 2 | 127,240,938 | 127,247,816 | 6,878 -   | 1 |
| GenelD:69470    | Tmem127   | 2 | 127,247,975 | 127,260,764 | 12,789 +  | 2 |
| GenelD:545459   | Gm10766   | 2 | 127,269,458 | 127,270,438 | 980 -     | 1 |
| GenelD:99138    | Stard7    | 2 | 127,270,229 | 127,298,934 | 28,705 +  | 1 |
| GenelD:56461    | Kcnp3     | 2 | 127,456,498 | 127,521,370 | 64,872 -  | 1 |
| GenelD:72180    | Zfp661    | 2 | 127,575,533 | 127,584,677 | 9,144 -   | 1 |
| GenelD:77721    | Mrps5     | 2 | 127,587,426 | 127,603,986 | 16,560 +  | 1 |
| GenelD:12235    | Bub1      | 2 | 127,800,200 | 127,831,859 | 31,659 -  | 1 |
| GenelD:74121    | Acox1     | 2 | 127,854,628 | 128,123,893 | 269,265 + | 1 |
| GenelD:12125    | Bcl2l11   | 2 | 128,126,038 | 128,162,547 | 36,509 +  | 1 |
| GenelD:17222    | Anapc1    | 2 | 128,610,083 | 128,687,395 | 77,312 -  | 1 |
| GenelD:17289    | Mertk     | 2 | 128,698,997 | 128,802,187 | 103,190 + | 1 |
| GenelD:72477    | Tmem87b   | 2 | 128,818,303 | 128,854,261 | 35,958 +  | 1 |
| GenelD:57432    | Zc3h8     | 2 | 128,926,268 | 128,944,020 | 17,752 -  | 1 |
| GenelD:668894   | Gm14025   | 2 | 129,025,073 | 129,048,166 | 23,093 -  | 1 |
| GenelD:10050338 | Gm14022   | 2 | 129,058,887 | 129,065,911 | 7,024 -   | 1 |
| GenelD:69737    | Ttl       | 2 | 129,065,947 | 129,096,283 | 30,336 +  | 1 |
| GenelD:20515    | Slc20a1   | 2 | 129,198,773 | 129,211,615 | 12,842 +  | 1 |
| GenelD:70466    | Ckap2l    | 2 | 129,268,210 | 129,297,212 | 29,002 -  | 1 |
| GenelD:10050346 | Gm14023   | 2 | 129,297,370 | 129,307,826 | 10,456 +  | 1 |

|                 |               |   |             |             |           |   |
|-----------------|---------------|---|-------------|-------------|-----------|---|
| GenelD:16175    | Il1a          | 2 | 129,299,610 | 129,309,972 | 10,362 -  | 1 |
| GenelD:654409   | 4932416H05Rik | 2 | 129,798,369 | 129,801,459 | 3,090 -   | 1 |
| GenelD:67333    | Stk35         | 2 | 129,800,517 | 129,832,287 | 31,770 +  | 1 |
| GenelD:20638    | Snrpb         | 2 | 130,171,636 | 130,179,364 | 7,728 -   | 1 |
| GenelD:192140   | Tmc2          | 2 | 130,195,194 | 130,264,445 | 69,251 +  | 1 |
| GenelD:67134    | Nop56         | 2 | 130,274,412 | 130,279,313 | 4,901 +   | 1 |
| GenelD:10021745 | Snord110      | 2 | 130,275,515 | 130,275,573 | 58 +      | 1 |
| GenelD:10021742 | Snord57       | 2 | 130,278,026 | 130,278,088 | 62 +      | 1 |
| GenelD:170718   | Idh3b         | 2 | 130,279,309 | 130,284,451 | 5,142 -   | 1 |
| GenelD:228598   | Ebf4          | 2 | 130,295,939 | 130,370,481 | 74,542 +  | 2 |
| GenelD:19262    | Ptpa          | 2 | 130,450,278 | 130,554,300 | 104,022 + | 1 |
| GenelD:321014   | 4930473A02Rik | 2 | 130,543,791 | 130,563,749 | 19,958 -  | 1 |
| GenelD:99045    | Mrps26        | 2 | 130,563,757 | 130,565,394 | 1,637 +   | 1 |
| GenelD:140629   | Ubox5         | 2 | 130,589,996 | 130,630,038 | 40,042 -  | 2 |
| GenelD:380601   | Fastkd5       | 2 | 130,613,838 | 130,630,027 | 16,189 -  | 2 |
| GenelD:241638   | Lzts3         | 2 | 130,632,839 | 130,642,803 | 9,964 -   | 2 |
| GenelD:269356   | Slc4a11       | 2 | 130,684,108 | 130,697,519 | 13,411 -  | 1 |
| GenelD:613258   | A730017L22Rik | 2 | 130,872,541 | 130,906,396 | 33,855 -  | 1 |
| GenelD:11990    | Atrn          | 2 | 130,906,496 | 131,030,329 | 123,833 + | 1 |
| GenelD:72630    | Hspa12b       | 2 | 131,127,412 | 131,145,985 | 18,573 +  | 1 |
| GenelD:67326    | 1700037H04Rik | 2 | 131,146,325 | 131,160,020 | 13,695 -  | 1 |
| GenelD:70997    | Spef1         | 2 | 131,170,261 | 131,174,810 | 4,549 -   | 1 |
| GenelD:12616    | Cenpb         | 2 | 131,177,289 | 131,180,012 | 2,723 -   | 1 |
| GenelD:12531    | Cdc25b        | 2 | 131,186,948 | 131,198,511 | 11,563 +  | 1 |
| GenelD:74450    | Pank2         | 2 | 131,262,500 | 131,299,188 | 36,688 +  | 1 |
| GenelD:51902    | Rnf24         | 2 | 131,298,488 | 131,352,892 | 54,404 -  | 1 |
| GenelD:228608   | Smox          | 2 | 131,491,862 | 131,525,183 | 33,321 +  | 1 |
| GenelD:19122    | Prnp          | 2 | 131,909,928 | 131,938,431 | 28,503 +  | 1 |
| GenelD:215653   | Rassf2        | 2 | 131,992,850 | 132,029,988 | 37,138 -  | 1 |
| GenelD:54338    | Slc23a2       | 2 | 132,052,496 | 132,145,108 | 92,612 -  | 1 |
| GenelD:18538    | Pcna          | 2 | 132,249,286 | 132,253,180 | 3,894 -   | 1 |
| GenelD:110911   | Cds2          | 2 | 132,263,257 | 132,312,041 | 48,784 +  | 1 |
| GenelD:74182    | Gpcpd1        | 2 | 132,529,083 | 132,578,248 | 49,165 -  | 1 |
| GenelD:66926    | Trmt6         | 2 | 132,804,215 | 132,816,054 | 11,839 -  | 1 |
| GenelD:66634    | Mcm8          | 2 | 132,816,335 | 132,844,197 | 27,862 +  | 1 |
| GenelD:320974   | Lrrn4         | 2 | 132,868,516 | 132,880,862 | 12,346 -  | 1 |
| GenelD:12156    | Bmp2          | 2 | 133,553,199 | 133,562,885 | 9,686 +   | 1 |
| GenelD:18795    | Plcb1         | 2 | 134,786,164 | 135,475,258 | 689,094 + | 1 |
| GenelD:16449    | Jag1          | 2 | 137,081,451 | 137,116,520 | 35,069 -  | 2 |
| GenelD:319909   | Ism1          | 2 | 139,678,178 | 139,758,581 | 80,403 +  | 1 |
| GenelD:12075    | Bfsp1         | 2 | 143,826,528 | 143,863,173 | 36,645 -  | 1 |
| GenelD:56431    | Dstn          | 2 | 143,915,331 | 143,943,324 | 27,993 +  | 1 |
| GenelD:81910    | Rrbp1         | 2 | 143,947,395 | 144,011,263 | 63,868 -  | 1 |
| GenelD:69178    | Snx5          | 2 | 144,250,123 | 144,270,902 | 20,779 -  | 1 |
| GenelD:10031351 | Snord17       | 2 | 144,265,982 | 144,266,202 | 220 -     | 1 |
| GenelD:74528    | Mgme1         | 2 | 144,271,035 | 144,281,229 | 10,194 +  | 1 |
| GenelD:27054    | Sec23b        | 2 | 144,556,229 | 144,590,753 | 34,524 +  | 1 |

|               |               |   |             |             |           |   |
|---------------|---------------|---|-------------|-------------|-----------|---|
| GenelD:228715 | Gm561         | 2 | 144,594,065 | 144,595,365 | 1,300 +   | 1 |
| GenelD:66044  | Dtd1          | 2 | 144,599,953 | 144,768,747 | 168,794 + | 1 |
| GenelD:67877  | Naa20         | 2 | 145,903,241 | 145,916,425 | 13,184 +  | 1 |
| GenelD:66877  | Crnkl1        | 2 | 145,917,482 | 145,934,700 | 17,218 -  | 1 |
| GenelD:78774  | 4930529M08Rik | 2 | 145,934,784 | 145,964,226 | 29,442 +  | 1 |
| GenelD:53626  | Insm1         | 2 | 146,221,997 | 146,225,020 | 3,023 +   | 3 |
| GenelD:24128  | Xrn2          | 2 | 147,013,060 | 147,078,000 | 64,940 +  | 1 |
| GenelD:15376  | Foxa2         | 2 | 148,042,878 | 148,046,969 | 4,091 -   | 1 |
| GenelD:20608  | Sstr4         | 2 | 148,395,377 | 148,396,764 | 1,387 +   | 1 |
| GenelD:21824  | Thbd          | 2 | 148,404,471 | 148,408,188 | 3,717 -   | 1 |
| GenelD:56488  | Nxt1          | 2 | 148,672,615 | 148,676,026 | 3,411 +   | 1 |
| GenelD:74533  | Gzf1          | 2 | 148,681,120 | 148,692,949 | 11,829 +  | 1 |
| GenelD:13010  | Cst3          | 2 | 148,871,732 | 148,875,468 | 3,736 -   | 1 |
| GenelD:433485 | Syndig1       | 2 | 149,830,783 | 150,004,392 | 173,609 + | 1 |
| GenelD:71881  | Apmap         | 2 | 150,583,081 | 150,608,523 | 25,442 -  | 1 |
| GenelD:68738  | Acss1         | 2 | 150,618,111 | 150,668,240 | 50,129 -  | 2 |
| GenelD:109344 | E130215H24Rik | 2 | 150,667,494 | 150,668,932 | 1,438 +   | 1 |
| GenelD:110078 | Pygb          | 2 | 150,786,796 | 150,831,748 | 44,952 +  | 1 |
| GenelD:78177  | Ninl          | 2 | 150,934,519 | 151,009,398 | 74,879 -  | 1 |
| GenelD:14225  | Fkbp1a        | 2 | 151,542,499 | 151,561,691 | 19,192 +  | 1 |
| GenelD:228769 | Psmf1         | 2 | 151,716,062 | 151,741,293 | 25,231 -  | 1 |
| GenelD:75283  | 4930556L07Rik | 2 | 151,747,578 | 151,751,425 | 3,847 -   | 1 |
| GenelD:545474 | Scrt2         | 2 | 152,081,529 | 152,095,802 | 14,273 +  | 2 |
| GenelD:76650  | Srxn1         | 2 | 152,105,524 | 152,111,376 | 5,852 +   | 1 |
| GenelD:12995  | Csnk2a1       | 2 | 152,226,840 | 152,281,852 | 55,012 +  | 1 |
| GenelD:67231  | Tbc1d20       | 2 | 152,293,872 | 152,312,590 | 18,718 +  | 1 |
| GenelD:24105  | Rbck1         | 2 | 152,316,334 | 152,332,639 | 16,305 -  | 1 |
| GenelD:228775 | Trib3         | 2 | 152,337,425 | 152,344,060 | 6,635 -   | 1 |
| GenelD:20667  | Sox12         | 2 | 152,393,611 | 152,398,046 | 4,435 -   | 1 |
| GenelD:67917  | Zcchc3        | 2 | 152,411,956 | 152,415,044 | 3,088 -   | 1 |
| GenelD:228778 | 6820408C15Rik | 2 | 152,415,587 | 152,444,328 | 28,741 +  | 1 |
| GenelD:654459 | Defb25        | 2 | 152,622,356 | 152,623,053 | 697 -     | 1 |
| GenelD:19700  | Rem1          | 2 | 152,627,008 | 152,635,191 | 8,183 +   | 2 |
| GenelD:14950  | H13           | 2 | 152,669,461 | 152,708,668 | 39,207 +  | 3 |
| GenelD:15901  | Id1           | 2 | 152,736,274 | 152,737,410 | 1,136 +   | 1 |
| GenelD:12048  | Bcl2l1        | 2 | 152,780,668 | 152,831,682 | 51,014 -  | 2 |
| GenelD:72119  | Tpx2          | 2 | 152,847,964 | 152,895,321 | 47,357 +  | 1 |
| GenelD:228785 | Mylk2         | 2 | 152,911,352 | 152,923,065 | 11,713 +  | 1 |
| GenelD:14239  | Foxs1         | 2 | 152,931,898 | 152,933,208 | 1,310 -   | 2 |
| GenelD:252864 | Dusp15        | 2 | 152,940,995 | 152,951,582 | 10,587 -  | 2 |
| GenelD:74711  | Ttll9         | 2 | 152,962,485 | 153,008,482 | 45,997 +  | 1 |
| GenelD:68559  | Pdrg1         | 2 | 153,008,890 | 153,015,383 | 6,493 -   | 1 |
| GenelD:228787 | Xkr7          | 2 | 153,031,852 | 153,055,775 | 23,923 +  | 1 |
| GenelD:16569  | Kif3b         | 2 | 153,291,416 | 153,333,390 | 41,974 +  | 1 |
| GenelD:72326  | 2500004C02Rik | 2 | 153,341,157 | 153,345,810 | 4,653 -   | 1 |
| GenelD:228790 | Asxl1         | 2 | 153,346,139 | 153,404,007 | 57,868 +  | 1 |
| GenelD:329540 | 8430427H17Rik | 2 | 153,407,461 | 153,529,971 | 122,510 - | 3 |

|                 |               |   |             |             |           |   |
|-----------------|---------------|---|-------------|-------------|-----------|---|
| GenelD:228792   | 7530422B04Rik | 2 | 153,648,690 | 153,650,635 | 1,945 -   | 1 |
| GenelD:13436    | Dnmt3b        | 2 | 153,649,454 | 153,687,730 | 38,276 +  | 1 |
| GenelD:20648    | Snta1         | 2 | 154,376,314 | 154,408,084 | 31,770 -  | 1 |
| GenelD:12396    | Cbfa2t2       | 2 | 154,436,484 | 154,539,356 | 102,872 + | 1 |
| GenelD:56846    | Necab3        | 2 | 154,544,405 | 154,558,853 | 14,448 -  | 1 |
| GenelD:13555    | E2f1          | 2 | 154,559,639 | 154,569,852 | 10,213 -  | 1 |
| GenelD:59038    | Pxmp4         | 2 | 154,587,044 | 154,603,673 | 16,629 -  | 1 |
| GenelD:228807   | Zfp341        | 2 | 154,613,368 | 154,646,817 | 33,449 +  | 1 |
| GenelD:75608    | Chmp4b        | 2 | 154,657,026 | 154,694,783 | 37,757 +  | 1 |
| GenelD:19383    | Raly          | 2 | 154,791,110 | 154,867,261 | 76,151 +  | 1 |
| GenelD:67204    | Eif2s2        | 2 | 154,871,410 | 154,892,906 | 21,496 -  | 1 |
| GenelD:16396    | Itch          | 2 | 155,133,481 | 155,226,855 | 93,374 +  | 1 |
| GenelD:68728    | Trp53inp2     | 2 | 155,381,856 | 155,389,847 | 7,991 +   | 1 |
| GenelD:56406    | Ncoa6         | 2 | 155,390,656 | 155,440,783 | 50,127 -  | 1 |
| GenelD:56407    | Trpc4ap       | 2 | 155,634,277 | 155,692,384 | 58,107 -  | 1 |
| GenelD:108687   | Edem2         | 2 | 155,701,673 | 155,729,475 | 27,802 -  | 1 |
| GenelD:17391    | Mmp24         | 2 | 155,775,344 | 155,818,366 | 43,022 +  | 1 |
| GenelD:613262   | BC029722      | 2 | 155,817,730 | 155,819,203 | 1,473 -   | 1 |
| GenelD:16418    | Eif6          | 2 | 155,819,837 | 155,826,925 | 7,088 -   | 1 |
| GenelD:71405    | Fam83c        | 2 | 155,829,183 | 155,834,854 | 5,671 -   | 1 |
| GenelD:16328    | Cep250        | 2 | 155,956,558 | 155,998,900 | 42,342 +  | 1 |
| GenelD:245865   | Spag4         | 2 | 156,065,213 | 156,069,499 | 4,286 +   | 1 |
| GenelD:266692   | Cpne1         | 2 | 156,071,841 | 156,111,965 | 40,124 -  | 2 |
| GenelD:75710    | Rbm12         | 2 | 156,094,882 | 156,111,965 | 17,083 -  | 1 |
| GenelD:18041    | Nfs1          | 2 | 156,123,637 | 156,144,186 | 20,549 -  | 1 |
| GenelD:67067    | Romo1         | 2 | 156,144,153 | 156,145,794 | 1,641 +   | 1 |
| GenelD:170791   | Rbm39         | 2 | 156,147,239 | 156,180,240 | 33,001 -  | 2 |
| GenelD:10105585 | LOC101055858  | 2 | 156,180,330 | 156,180,750 | 420 +     | 1 |
| GenelD:228829   | Phf20         | 2 | 156,196,647 | 156,309,953 | 113,306 + | 2 |
| GenelD:19018    | Scand1        | 2 | 156,311,846 | 156,312,704 | 858 -     | 1 |
| GenelD:70873    | Cnbd2         | 2 | 156,312,473 | 156,375,638 | 63,165 +  | 1 |
| GenelD:632394   | Gm14251       | 2 | 156,322,402 | 156,322,680 | 278 +     | 1 |
| GenelD:668941   | Gm14173       | 2 | 156,410,842 | 156,411,180 | 338 -     | 1 |
| GenelD:13821    | Epb4.111      | 2 | 156,421,052 | 156,543,214 | 122,162 + | 1 |
| GenelD:10050435 | Gm14169       | 2 | 156,609,198 | 156,613,422 | 4,224 -   | 1 |
| GenelD:228836   | Dlgap4        | 2 | 156,613,705 | 156,764,363 | 150,658 + | 2 |
| GenelD:74846    | 4930405A21Rik | 2 | 156,714,539 | 156,720,909 | 6,370 -   | 1 |
| GenelD:10050436 | Gm14230       | 2 | 156,829,851 | 156,839,919 | 10,068 -  | 1 |
| GenelD:228839   | Tgif2         | 2 | 156,840,077 | 156,855,532 | 15,455 +  | 2 |
| GenelD:74487    | 5430405H02Rik | 2 | 156,852,403 | 156,862,945 | 10,542 -  | 1 |
| GenelD:74704    | 4930518I15Rik | 2 | 156,856,615 | 156,858,069 | 1,454 -   | 1 |
| GenelD:67388    | 1110008F13Rik | 2 | 156,863,122 | 156,873,563 | 10,441 +  | 1 |
| GenelD:77799    | Sla2          | 2 | 156,872,922 | 156,887,078 | 14,156 -  | 1 |
| GenelD:66934    | Dsn1          | 2 | 156,995,062 | 157,007,075 | 12,013 -  | 1 |
| GenelD:320706   | Soga1         | 2 | 157,010,442 | 157,079,265 | 68,823 -  | 2 |
| GenelD:383766   | Tldc2         | 2 | 157,087,055 | 157,096,481 | 9,426 +   | 1 |
| GenelD:56045    | Samhd1        | 2 | 157,097,529 | 157,135,222 | 37,693 -  | 1 |

|                 |               |   |             |             |           |   |
|-----------------|---------------|---|-------------|-------------|-----------|---|
| GenelD:19650    | Rbl1          | 2 | 157,145,893 | 157,204,534 | 58,641 -  | 1 |
| GenelD:629499   | Mroh8         | 2 | 157,208,550 | 157,279,549 | 70,999 -  | 2 |
| GenelD:20014    | Rpn2          | 2 | 157,279,098 | 157,326,318 | 47,220 +  | 1 |
| GenelD:69161    | Manbal        | 2 | 157,367,594 | 157,396,763 | 29,169 +  | 1 |
| GenelD:53619    | Blcap         | 2 | 157,556,362 | 157,566,361 | 9,999 -   | 2 |
| GenelD:18111    | Nnat          | 2 | 157,560,110 | 157,562,522 | 2,412 +   | 2 |
| GenelD:68108    | 9430008C03Rik | 2 | 158,353,700 | 158,361,522 | 7,822 -   | 1 |
| GenelD:228850   | Ralgapb       | 2 | 158,409,853 | 158,499,253 | 89,400 +  | 1 |
| GenelD:228852   | Ppp1r16b      | 2 | 158,666,733 | 158,766,334 | 99,601 +  | 2 |
| GenelD:71878    | Fam83d        | 2 | 158,768,099 | 158,786,637 | 18,538 +  | 1 |
| GenelD:16658    | Mafb          | 2 | 160,363,677 | 160,367,065 | 3,388 -   | 1 |
| GenelD:21969    | Top1          | 2 | 160,645,897 | 160,722,764 | 76,867 +  | 2 |
| GenelD:18803    | Plcg1         | 2 | 160,731,310 | 160,775,760 | 44,450 +  | 1 |
| GenelD:320799   | Zhx3          | 2 | 160,770,447 | 160,872,990 | 102,543 - | 1 |
| GenelD:64899    | Lpin3         | 2 | 160,880,670 | 160,906,000 | 25,330 +  | 2 |
| GenelD:280635   | Emilin3       | 2 | 160,906,438 | 160,912,328 | 5,890 -   | 1 |
| GenelD:67996    | Srsf6         | 2 | 162,931,508 | 162,937,121 | 5,613 +   | 1 |
| GenelD:27219    | Sgk2          | 2 | 162,987,481 | 163,014,127 | 26,646 +  | 1 |
| GenelD:245866   | Ift52         | 2 | 163,017,472 | 163,046,135 | 28,663 +  | 2 |
| GenelD:17865    | Mybl2         | 2 | 163,054,635 | 163,084,687 | 30,052 +  | 1 |
| GenelD:66680    | 3230401D17Rik | 2 | 163,405,822 | 163,419,470 | 13,648 -  | 1 |
| GenelD:228859   | Fitm2         | 2 | 163,468,703 | 163,472,629 | 3,926 -   | 1 |
| GenelD:69517    | 2310001K24Rik | 2 | 163,472,545 | 163,473,003 | 458 +     | 1 |
| GenelD:26943    | Serinc3       | 2 | 163,623,273 | 163,645,143 | 21,870 -  | 1 |
| GenelD:68386    | 0610039K10Rik | 2 | 163,644,850 | 163,645,800 | 950 +     | 1 |
| GenelD:54401    | Ywhab         | 2 | 163,995,197 | 164,018,587 | 23,390 +  | 1 |
| GenelD:67145    | Tommm34       | 2 | 164,053,541 | 164,071,102 | 17,561 -  | 1 |
| GenelD:58231    | Stk4          | 2 | 164,074,178 | 164,155,521 | 81,343 +  | 1 |
| GenelD:16538    | Kcns1         | 2 | 164,163,619 | 164,171,113 | 7,494 -   | 1 |
| GenelD:209232   | Wfdc5         | 2 | 164,176,325 | 164,182,742 | 6,417 -   | 1 |
| GenelD:20971    | Sdc4          | 2 | 164,424,247 | 164,443,188 | 18,941 -  | 1 |
| GenelD:66460    | Sys1          | 2 | 164,460,971 | 164,465,510 | 4,539 +   | 1 |
| GenelD:73603    | Trp53tg5      | 2 | 164,470,301 | 164,473,718 | 3,417 -   | 1 |
| GenelD:52840    | Dbn1d2        | 2 | 164,486,140 | 164,493,323 | 7,183 +   | 2 |
| GenelD:78928    | Pigt          | 2 | 164,497,525 | 164,508,301 | 10,776 +  | 1 |
| GenelD:71856    | Wfdc3         | 2 | 164,731,226 | 164,743,267 | 12,041 -  | 1 |
| GenelD:10105592 | LOC101055924  | 2 | 164,743,565 | 164,745,931 | 2,366 -   | 1 |
| GenelD:76233    | Dnttip1       | 2 | 164,746,015 | 164,768,220 | 22,205 +  | 1 |
| GenelD:21925    | Tnnc2         | 2 | 164,777,161 | 164,779,734 | 2,573 -   | 1 |
| GenelD:101113   | Snx21         | 2 | 164,786,021 | 164,792,770 | 6,749 +   | 1 |
| GenelD:170789   | Acot8         | 2 | 164,792,768 | 164,804,881 | 12,113 -  | 1 |
| GenelD:71971    | Zswim1        | 2 | 164,822,686 | 164,826,867 | 4,181 +   | 2 |
| GenelD:75642    | Spata25       | 2 | 164,827,382 | 164,828,534 | 1,152 -   | 2 |
| GenelD:415115   | Neur12        | 2 | 164,830,730 | 164,833,596 | 2,866 -   | 2 |
| GenelD:19025    | Ctsa          | 2 | 164,832,873 | 164,841,032 | 8,159 +   | 2 |
| GenelD:18830    | Pltp          | 2 | 164,839,518 | 164,857,708 | 18,190 -  | 3 |
| GenelD:228866   | Pcif1         | 2 | 164,879,368 | 164,891,437 | 12,069 +  | 1 |

|                 |               |   |             |             |           |   |
|-----------------|---------------|---|-------------|-------------|-----------|---|
| GenelD:329559   | Zfp335        | 2 | 164,891,892 | 164,911,750 | 19,858 -  | 1 |
| GenelD:629777   | Gm11458       | 2 | 164,911,360 | 164,919,953 | 8,593 +   | 1 |
| GenelD:57138    | Slc12a5       | 2 | 164,967,988 | 164,999,731 | 31,743 +  | 1 |
| GenelD:228869   | Ncoa5         | 2 | 165,000,357 | 165,034,779 | 34,422 -  | 1 |
| GenelD:228875   | Slc35c2       | 2 | 165,276,522 | 165,287,838 | 11,316 -  | 1 |
| GenelD:140579   | Elmo2         | 2 | 165,288,031 | 165,326,479 | 38,448 -  | 2 |
| GenelD:114644   | Slc13a3       | 2 | 165,405,295 | 165,473,197 | 67,902 -  | 1 |
| GenelD:17979    | Ncoa3         | 2 | 165,992,637 | 166,073,242 | 80,605 +  | 1 |
| GenelD:72043    | Sulf2         | 2 | 166,073,899 | 166,155,683 | 81,784 -  | 1 |
| GenelD:277360   | Prex1         | 2 | 166,566,345 | 166,713,832 | 147,487 - | 1 |
| GenelD:76367    | Trp53rk       | 2 | 166,793,767 | 166,799,492 | 5,725 +   | 1 |
| GenelD:99371    | Arfgef2       | 2 | 166,805,581 | 166,898,052 | 92,471 +  | 2 |
| GenelD:110750   | Cse1l         | 2 | 166,906,096 | 166,946,389 | 40,293 +  | 1 |
| GenelD:20853    | Stau1         | 2 | 166,948,141 | 166,996,278 | 48,137 -  | 1 |
| GenelD:228889   | Ddx27         | 2 | 167,015,313 | 167,034,945 | 19,632 +  | 1 |
| GenelD:98999    | Znfx1         | 2 | 167,035,793 | 167,063,015 | 27,222 -  | 1 |
| GenelD:68949    | 1500012F01Rik | 2 | 167,062,934 | 167,065,862 | 2,928 +   | 1 |
| GenelD:10021744 | Snord12       | 2 | 167,065,293 | 167,065,358 | 65 +      | 1 |
| GenelD:16500    | Kcnb1         | 2 | 167,095,969 | 167,188,818 | 92,849 -  | 1 |
| GenelD:19223    | Ptgis         | 2 | 167,203,196 | 167,240,537 | 37,341 -  | 1 |
| GenelD:263876   | Spata2        | 2 | 167,481,136 | 167,492,874 | 11,738 -  | 1 |
| GenelD:81018    | Rnf114        | 2 | 167,492,645 | 167,516,166 | 23,521 +  | 2 |
| GenelD:20613    | Snai1         | 2 | 167,538,227 | 167,542,814 | 4,587 +   | 2 |
| GenelD:66589    | Ube2v1        | 2 | 167,607,639 | 167,632,005 | 24,366 -  | 1 |
| GenelD:407243   | Tmem189       | 2 | 167,643,225 | 167,661,544 | 18,319 -  | 1 |
| GenelD:12608    | Cebpb         | 2 | 167,688,915 | 167,690,418 | 1,503 +   | 1 |
| GenelD:329562   | A530013C23Rik | 2 | 167,691,208 | 167,697,413 | 6,205 +   | 1 |
| GenelD:19246    | Ptpn1         | 2 | 167,932,327 | 167,979,385 | 47,058 +  | 1 |
| GenelD:58220    | Pard6b        | 2 | 168,081,004 | 168,101,203 | 20,199 +  | 1 |
| GenelD:11538    | Adnp          | 2 | 168,180,965 | 168,207,062 | 26,097 -  | 1 |
| GenelD:13480    | Dpm1          | 2 | 168,209,048 | 168,230,379 | 21,331 -  | 2 |
| GenelD:69372    | Mocs3         | 2 | 168,230,622 | 168,232,303 | 1,681 +   | 1 |
| GenelD:22722    | Zfp64         | 2 | 168,925,361 | 168,955,587 | 30,226 -  | 1 |
| GenelD:228911   | Tshz2         | 2 | 169,633,646 | 169,888,504 | 254,858 + | 1 |
| GenelD:109054   | Pfdn4         | 2 | 170,496,428 | 170,519,070 | 22,642 +  | 1 |
| GenelD:10050294 | Gm16796       | 2 | 170,499,357 | 170,511,927 | 12,570 -  | 1 |
| GenelD:228942   | Cbln4         | 2 | 172,036,336 | 172,043,466 | 7,130 -   | 1 |
| GenelD:67017    | Fam210b       | 2 | 172,345,577 | 172,355,749 | 10,172 +  | 1 |
| GenelD:12162    | Bmp7          | 2 | 172,869,686 | 172,940,293 | 70,607 -  | 1 |
| GenelD:26972    | Spo11         | 2 | 172,979,842 | 172,993,576 | 13,734 +  | 1 |
| GenelD:66679    | Rae1          | 2 | 173,000,117 | 173,015,739 | 15,622 +  | 2 |
| GenelD:56190    | Rbm38         | 2 | 173,021,902 | 173,034,734 | 12,832 +  | 1 |
| GenelD:19334    | Rab22a        | 2 | 173,659,845 | 173,702,182 | 42,337 +  | 1 |
| GenelD:56491    | Vapb          | 2 | 173,737,571 | 173,784,336 | 46,765 +  | 1 |
| GenelD:228960   | Stx16         | 2 | 174,077,051 | 174,099,771 | 22,720 +  | 1 |
| GenelD:14683    | Gnas          | 2 | 174,284,320 | 174,346,744 | 62,424 +  | 2 |
| GenelD:64138    | Ctsz          | 2 | 174,427,494 | 174,438,992 | 11,498 -  | 1 |

|                 |               |   |             |             |           |   |
|-----------------|---------------|---|-------------|-------------|-----------|---|
| GenelD:320558   | Sycp2         | 2 | 178,345,295 | 178,407,658 | 62,363 -  | 1 |
| GenelD:228966   | Ppp1r3d       | 2 | 178,411,206 | 178,414,472 | 3,266 -   | 1 |
| GenelD:71532    | Fam217b       | 2 | 178,414,534 | 178,422,177 | 7,643 +   | 1 |
| GenelD:228980   | Taf4a         | 2 | 179,912,146 | 179,976,646 | 64,500 -  | 2 |
| GenelD:66730    | 4921531C22Rik | 2 | 179,976,853 | 179,979,013 | 2,160 +   | 2 |
| GenelD:241846   | Lsm14b        | 2 | 180,024,987 | 180,035,461 | 10,474 +  | 2 |
| GenelD:26444    | Psm7          | 2 | 180,036,376 | 180,042,402 | 6,026 -   | 1 |
| GenelD:269397   | Ss18l1        | 2 | 180,042,483 | 180,070,201 | 27,718 +  | 1 |
| GenelD:228983   | Osbpl2        | 2 | 180,119,366 | 180,162,680 | 43,314 +  | 2 |
| GenelD:56436    | Adrm1         | 2 | 180,171,588 | 180,176,283 | 4,695 +   | 1 |
| GenelD:16776    | Lama5         | 2 | 180,176,373 | 180,225,859 | 49,486 -  | 2 |
| GenelD:73247    | Mrgbp         | 2 | 180,581,304 | 180,585,634 | 4,330 +   | 1 |
| GenelD:72075    | Ogfr          | 2 | 180,589,407 | 180,595,837 | 6,430 +   | 1 |
| GenelD:23856    | Dido1         | 2 | 180,657,964 | 180,709,999 | 52,035 -  | 2 |
| GenelD:76425    | Gid8          | 2 | 180,712,546 | 180,718,517 | 5,971 +   | 2 |
| GenelD:140489   | Bhlhe23       | 2 | 180,774,381 | 180,776,900 | 2,519 -   | 1 |
| GenelD:228994   | Ythdf1        | 2 | 180,904,377 | 180,920,936 | 16,559 -  | 1 |
| GenelD:329581   | Birc7         | 2 | 180,929,023 | 180,934,010 | 4,987 +   | 1 |
| GenelD:228998   | Arfgap1       | 2 | 180,967,225 | 180,982,524 | 15,299 +  | 1 |
| GenelD:66496    | Pdpf          | 2 | 181,187,343 | 181,188,504 | 1,161 +   | 1 |
| GenelD:20459    | Ptk6          | 2 | 181,195,124 | 181,202,789 | 7,665 -   | 1 |
| GenelD:269400   | Rtel1         | 2 | 181,319,724 | 181,356,616 | 36,892 +  | 1 |
| GenelD:76688    | Arfrp1        | 2 | 181,357,690 | 181,365,404 | 7,714 -   | 1 |
| GenelD:229007   | Zgpat         | 2 | 181,364,931 | 181,380,793 | 15,862 +  | 1 |
| GenelD:72147    | Zbtb46        | 2 | 181,390,886 | 181,459,426 | 68,540 -  | 2 |
| GenelD:241850   | Abhd16b       | 2 | 181,493,206 | 181,494,980 | 1,774 +   | 1 |
| GenelD:66314    | Tpd52l2       | 2 | 181,497,253 | 181,516,757 | 19,504 +  | 2 |
| GenelD:13002    | Dnajc5        | 2 | 181,520,505 | 181,552,249 | 31,744 +  | 1 |
| GenelD:68556    | Uckl1         | 2 | 181,569,152 | 181,581,973 | 12,821 -  | 1 |
| GenelD:10027184 | Gm16119       | 2 | 181,578,480 | 181,585,115 | 6,635 +   | 1 |
| GenelD:269401   | Znf512b       | 2 | 181,582,103 | 181,592,461 | 10,358 -  | 1 |
| GenelD:20672    | Sox18         | 2 | 181,669,837 | 181,671,640 | 1,803 -   | 2 |
| GenelD:21400    | Tcea2         | 2 | 181,680,310 | 181,688,051 | 7,741 +   | 3 |
| GenelD:56470    | Rgs19         | 2 | 181,688,423 | 181,693,924 | 5,501 -   | 2 |
| GenelD:277496   | 4930526D03Rik | 2 | 181,696,795 | 181,698,442 | 1,647 -   | 1 |
| GenelD:19302    | Pex2          | 3 | 5,560,188   | 5,576,248   | 16,060 -  | 1 |
| GenelD:18767    | Pkia          | 3 | 7,366,604   | 7,445,366   | 78,762 +  | 1 |
| GenelD:21985    | Tpd52         | 3 | 8,929,436   | 9,004,515   | 75,079 -  | 1 |
| GenelD:229055   | Zbtb10        | 3 | 9,250,567   | 9,285,333   | 34,766 +  | 1 |
| GenelD:94212    | Pag1          | 3 | 9,687,479   | 9,833,679   | 146,200 - | 1 |
| GenelD:55980    | Impa1         | 3 | 10,313,540  | 10,331,439  | 17,899 -  | 1 |
| GenelD:241877   | Slc10a5       | 3 | 10,331,734  | 10,335,656  | 3,922 -   | 1 |
| GenelD:66361    | Zfand1        | 3 | 10,339,956  | 10,351,301  | 11,345 -  | 1 |
| GenelD:76897    | Raly1         | 3 | 13,471,655  | 14,182,287  | 710,632 + | 1 |
| GenelD:71710    | Lrrcc1        | 3 | 14,533,788  | 14,572,658  | 38,870 +  | 1 |
| GenelD:13559    | E2f5          | 3 | 14,578,671  | 14,606,309  | 27,638 +  | 1 |
| GenelD:229096   | Ythdf3        | 3 | 16,183,183  | 16,217,037  | 33,854 +  | 1 |



|                 |               |   |            |            |           |   |
|-----------------|---------------|---|------------|------------|-----------|---|
| GenelD:18583    | Pde7a         | 3 | 19,225,918 | 19,311,322 | 85,404 -  | 1 |
| GenelD:12807    | Hps3          | 3 | 19,995,945 | 20,035,310 | 39,365 -  | 1 |
| GenelD:27357    | Gyg           | 3 | 20,122,084 | 20,155,096 | 33,012 -  | 1 |
| GenelD:10004035 | 2810416G20Rik | 3 | 22,074,411 | 22,078,707 | 4,296 -   | 1 |
| GenelD:81004    | Tbl1xr1       | 3 | 22,076,652 | 22,216,594 | 139,942 + | 1 |
| GenelD:13605    | Ect2          | 3 | 27,097,222 | 27,153,878 | 56,656 -  | 1 |
| GenelD:76657    | 1700125G22Rik | 3 | 27,154,026 | 27,157,019 | 2,993 +   | 1 |
| GenelD:72007    | Fndc3b        | 3 | 27,416,162 | 27,710,439 | 294,277 - | 1 |
| GenelD:665113   | Tnik          | 3 | 28,263,214 | 28,670,585 | 407,371 + | 1 |
| GenelD:208691   | Eif5a2        | 3 | 28,781,311 | 28,798,846 | 17,535 +  | 1 |
| GenelD:69276    | Sec62         | 3 | 30,792,876 | 30,821,263 | 28,387 +  | 1 |
| GenelD:71862    | Gpr160        | 3 | 30,855,950 | 30,897,192 | 41,242 +  | 1 |
| GenelD:241915   | Phc3          | 3 | 30,899,295 | 30,969,415 | 70,120 -  | 1 |
| GenelD:18759    | Prkci         | 3 | 30,995,771 | 31,052,740 | 56,969 +  | 1 |
| GenelD:20482    | Skil          | 3 | 31,095,061 | 31,122,577 | 27,516 +  | 1 |
| GenelD:67778    | Zfp639        | 3 | 32,510,550 | 32,520,833 | 10,283 +  | 2 |
| GenelD:67414    | Mfn1          | 3 | 32,529,482 | 32,579,225 | 49,743 +  | 1 |
| GenelD:56456    | Actl6a        | 3 | 32,708,546 | 32,726,971 | 18,425 +  | 1 |
| GenelD:72607    | Usp13         | 3 | 32,817,626 | 32,935,257 | 117,631 + | 1 |
| GenelD:67120    | Ttc14         | 3 | 33,800,195 | 33,816,634 | 16,439 +  | 1 |
| GenelD:320478   | Sox2ot        | 3 | 34,560,381 | 34,677,993 | 117,612 + | 1 |
| GenelD:20674    | Sox2          | 3 | 34,650,005 | 34,652,461 | 2,456 +   | 1 |
| GenelD:72039    | Mccc1         | 3 | 35,959,296 | 36,000,678 | 41,382 -  | 1 |
| GenelD:654424   | A330050B17Rik | 3 | 35,999,913 | 36,008,828 | 8,915 +   | 1 |
| GenelD:241943   | Ccdc144b      | 3 | 36,007,247 | 36,053,547 | 46,300 -  | 1 |
| GenelD:229211   | Acad9         | 3 | 36,066,000 | 36,092,857 | 26,857 +  | 1 |
| GenelD:50911    | Exosc9        | 3 | 36,552,606 | 36,565,727 | 13,121 +  | 1 |
| GenelD:12428    | Ccna2         | 3 | 36,564,865 | 36,571,996 | 7,131 -   | 1 |
| GenelD:71492    | Bbs7          | 3 | 36,573,143 | 36,613,389 | 40,246 -  | 1 |
| GenelD:229228   | Nudt6         | 3 | 37,404,984 | 37,419,590 | 14,606 -  | 1 |
| GenelD:57815    | Spata5        | 3 | 37,420,280 | 37,579,095 | 158,815 + | 1 |
| GenelD:24063    | Spry1         | 3 | 37,639,950 | 37,644,599 | 4,649 +   | 1 |
| GenelD:99696    | Ankrd50       | 3 | 38,449,261 | 38,484,816 | 35,555 -  | 1 |
| GenelD:329628   | Fat4          | 3 | 38,886,940 | 39,011,985 | 125,045 + | 2 |
| GenelD:18415    | Hspa4l        | 3 | 40,745,613 | 40,790,365 | 44,752 +  | 1 |
| GenelD:20873    | Plk4          | 3 | 40,799,951 | 40,816,883 | 16,932 +  | 1 |
| GenelD:214048   | Larp1b        | 3 | 40,950,631 | 40,977,793 | 27,162 +  | 1 |
| GenelD:70804    | Pgrmc2        | 3 | 41,066,326 | 41,083,046 | 16,720 -  | 1 |
| GenelD:269424   | Phf17         | 3 | 41,555,734 | 41,616,864 | 61,130 +  | 1 |
| GenelD:12457    | Ccrn4l        | 3 | 51,224,447 | 51,251,654 | 27,207 +  | 1 |
| GenelD:69257    | Elf2          | 3 | 51,255,665 | 51,325,987 | 70,322 -  | 1 |
| GenelD:67746    | 4930577N17Rik | 3 | 51,276,761 | 51,278,292 | 1,531 +   | 1 |
| GenelD:66377    | Ndufc1        | 3 | 51,405,479 | 51,408,955 | 3,476 -   | 1 |
| GenelD:74838    | Naa15         | 3 | 51,416,016 | 51,475,985 | 59,969 +  | 1 |
| GenelD:73251    | Setd7         | 3 | 51,515,318 | 51,560,823 | 45,505 -  | 1 |
| GenelD:10003968 | 5031434O11Rik | 3 | 51,559,757 | 51,567,117 | 7,360 +   | 1 |
| GenelD:433586   | Maml3         | 3 | 51,687,611 | 52,105,006 | 417,395 - | 2 |

|                 |               |   |            |            |           |   |
|-----------------|---------------|---|------------|------------|-----------|---|
| GenelD:56458    | Foxo1         | 3 | 52,268,337 | 52,350,109 | 81,772 +  | 1 |
| GenelD:108927   | Lhfp          | 3 | 53,041,547 | 53,261,679 | 220,132 + | 1 |
| GenelD:212114   | Nhlrc3        | 3 | 53,451,996 | 53,463,258 | 11,262 -  | 2 |
| GenelD:212127   | Proser1       | 3 | 53,463,817 | 53,481,755 | 17,938 +  | 2 |
| GenelD:242022   | Frem2         | 3 | 53,513,938 | 53,657,355 | 143,417 - | 1 |
| GenelD:67890    | Ufm1          | 3 | 53,853,376 | 53,863,807 | 10,431 -  | 1 |
| GenelD:69639    | Exosc8        | 3 | 54,728,679 | 54,735,364 | 6,685 -   | 1 |
| GenelD:66248    | Alg5          | 3 | 54,735,539 | 54,749,795 | 14,256 +  | 1 |
| GenelD:12427    | Ccna1         | 3 | 55,045,469 | 55,055,055 | 9,586 -   | 1 |
| GenelD:70970    | 4931419H13Rik | 3 | 55,055,242 | 55,084,002 | 28,760 +  | 1 |
| GenelD:26422    | Nbea          | 3 | 55,625,198 | 56,183,701 | 558,503 - | 2 |
| GenelD:17116    | Mab2111       | 3 | 55,782,510 | 55,785,287 | 2,777 +   | 1 |
| GenelD:97064    | Wwtr1         | 3 | 57,455,644 | 57,575,910 | 120,266 - | 1 |
| GenelD:18645    | Pfn2          | 3 | 57,841,895 | 57,847,757 | 5,862 -   | 1 |
| GenelD:72033    | Tsc22d2       | 3 | 58,415,689 | 58,466,787 | 51,098 +  | 1 |
| GenelD:28146    | Serp1         | 3 | 58,521,969 | 58,525,884 | 3,915 -   | 1 |
| GenelD:229317   | Eif2a         | 3 | 58,525,821 | 58,557,501 | 31,680 +  | 1 |
| GenelD:69227    | 2810407C02Rik | 3 | 58,576,658 | 58,593,544 | 16,886 +  | 1 |
| GenelD:20439    | Siah2         | 3 | 58,674,949 | 58,692,388 | 17,439 -  | 1 |
| GenelD:71301    | 4930593A02Rik | 3 | 58,692,589 | 58,788,524 | 95,935 +  | 1 |
| GenelD:329650   | Med12l        | 3 | 59,006,978 | 59,318,416 | 311,438 + | 1 |
| GenelD:56758    | Mbnl1         | 3 | 60,472,830 | 60,629,748 | 156,918 + | 1 |
| GenelD:18441    | P2ry1         | 3 | 61,002,795 | 61,008,979 | 6,184 +   | 1 |
| GenelD:74012    | Rap2b         | 3 | 61,364,507 | 61,368,703 | 4,196 +   | 1 |
| GenelD:622434   | Arhgef26      | 3 | 62,338,777 | 62,462,221 | 123,444 + | 1 |
| GenelD:17380    | Mme           | 3 | 63,295,872 | 63,382,231 | 86,359 +  | 1 |
| GenelD:329659   | E130311K13Rik | 3 | 63,914,696 | 63,929,385 | 14,689 -  | 1 |
| GenelD:229363   | Gmps          | 3 | 63,976,143 | 64,019,078 | 42,935 +  | 1 |
| GenelD:67437    | Ssr3          | 3 | 65,379,657 | 65,392,553 | 12,896 -  | 1 |
| GenelD:71004    | 4931440P22Rik | 3 | 65,527,483 | 65,529,414 | 1,931 -   | 1 |
| GenelD:99929    | Tiparp        | 3 | 65,528,447 | 65,555,518 | 27,071 +  | 1 |
| GenelD:624866   | Lekr1         | 3 | 65,666,228 | 65,831,162 | 164,934 + | 2 |
| GenelD:56706    | Ccnl1         | 3 | 65,946,151 | 65,958,225 | 12,074 -  | 1 |
| GenelD:109222   | Rarres1       | 3 | 67,478,886 | 67,515,523 | 36,637 -  | 1 |
| GenelD:10050538 | Gm21949       | 3 | 67,892,220 | 68,626,482 | 734,262 + | 1 |
| GenelD:30953    | Schip1        | 3 | 68,064,802 | 68,626,482 | 561,680 + | 1 |
| GenelD:68725    | 1110032F04Rik | 3 | 68,869,586 | 68,872,163 | 2,577 +   | 1 |
| GenelD:68259    | lft80         | 3 | 68,892,499 | 69,004,570 | 112,071 - | 1 |
| GenelD:70099    | Smc4          | 3 | 69,004,972 | 69,034,623 | 29,651 +  | 2 |
| GenelD:387175   | Mir15b        | 3 | 69,009,772 | 69,009,835 | 63 +      | 1 |
| GenelD:723949   | Mir16-2       | 3 | 69,009,902 | 69,009,996 | 94 +      | 1 |
| GenelD:66949    | Trim59        | 3 | 69,035,294 | 69,044,742 | 9,448 -   | 1 |
| GenelD:16649    | Kpna4         | 3 | 69,072,221 | 69,127,092 | 54,871 -  | 1 |
| GenelD:381452   | Gm1647        | 3 | 69,131,233 | 69,157,177 | 25,944 +  | 1 |
| GenelD:242083   | Ppm1l         | 3 | 69,316,918 | 69,555,404 | 238,486 + | 1 |
| GenelD:97112    | Nmd3          | 3 | 69,722,055 | 69,749,047 | 26,992 +  | 1 |
| GenelD:73124    | Golim4        | 3 | 75,876,383 | 75,956,831 | 80,448 -  | 1 |

|                 |               |   |            |            |           |   |
|-----------------|---------------|---|------------|------------|-----------|---|
| GenelD:329679   | Fnip2         | 3 | 79,455,971 | 79,567,679 | 111,708 - | 1 |
| GenelD:75879    | 4930589L23Rik | 3 | 79,568,192 | 79,572,580 | 4,388 +   | 1 |
| GenelD:67738    | Ppid          | 3 | 79,591,389 | 79,603,650 | 12,261 +  | 1 |
| GenelD:54635    | Pdghc         | 3 | 81,036,416 | 81,214,031 | 177,615 + | 1 |
| GenelD:20319    | Sfrp2         | 3 | 83,766,321 | 83,774,314 | 7,993 +   | 1 |
| GenelD:229473   | D930015E06Rik | 3 | 83,898,287 | 84,040,161 | 141,874 - | 1 |
| GenelD:229474   | Fhdc1         | 3 | 84,442,196 | 84,480,439 | 38,243 -  | 1 |
| GenelD:99889    | Arfp1         | 3 | 84,496,063 | 84,586,143 | 90,080 -  | 1 |
| GenelD:50754    | Fbxw7         | 3 | 84,815,577 | 84,979,198 | 163,621 + | 1 |
| GenelD:20091    | Rps3a1        | 3 | 86,137,940 | 86,142,668 | 4,728 -   | 1 |
| GenelD:19870    | Snord73a      | 3 | 86,138,791 | 86,138,858 | 67 -      | 1 |
| GenelD:19871    | Rnu73b        | 3 | 86,140,617 | 86,140,687 | 70 -      | 1 |
| GenelD:80877    | Lrba          | 3 | 86,224,690 | 86,782,694 | 558,004 + | 1 |
| GenelD:70762    | Dclk2         | 3 | 86,786,150 | 86,920,884 | 134,734 - | 1 |
| GenelD:27049    | Etv3          | 3 | 87,525,578 | 87,540,156 | 14,578 +  | 1 |
| GenelD:213498   | Arhgef11      | 3 | 87,618,751 | 87,738,033 | 119,282 + | 1 |
| GenelD:94315    | Prcc          | 3 | 87,858,903 | 87,885,562 | 26,659 -  | 1 |
| GenelD:15191    | Hdgf          | 3 | 87,906,321 | 87,916,132 | 9,811 +   | 1 |
| GenelD:67707    | Mrpl24        | 3 | 87,919,544 | 87,923,433 | 3,889 +   | 1 |
| GenelD:229503   | Rrnad1        | 3 | 87,922,601 | 87,930,195 | 7,594 -   | 1 |
| GenelD:229504   | Isg20l2       | 3 | 87,930,314 | 87,940,686 | 10,372 +  | 1 |
| GenelD:18008    | Nes           | 3 | 87,971,093 | 87,980,451 | 9,358 +   | 1 |
| GenelD:12032    | Bcan          | 3 | 87,987,531 | 88,000,356 | 12,825 -  | 1 |
| GenelD:73940    | Hapl2         | 3 | 88,021,750 | 88,027,511 | 5,761 -   | 1 |
| GenelD:10050289 | Gm19439       | 3 | 88,030,785 | 88,033,152 | 2,367 +   | 2 |
| GenelD:66614    | Gpatch4       | 3 | 88,043,108 | 88,055,993 | 12,885 +  | 2 |
| GenelD:246703   | Apoa1bp       | 3 | 88,056,523 | 88,058,495 | 1,972 -   | 1 |
| GenelD:214191   | Ttc24         | 3 | 88,069,410 | 88,078,304 | 8,894 -   | 1 |
| GenelD:404710   | Iqgap3        | 3 | 88,082,051 | 88,121,048 | 38,997 +  | 1 |
| GenelD:10050291 | Gm19451       | 3 | 88,138,135 | 88,139,398 | 1,263 -   | 1 |
| GenelD:17261    | Mef2d         | 3 | 88,142,395 | 88,169,167 | 26,772 +  | 1 |
| GenelD:10004227 | Gm3764        | 3 | 88,214,452 | 88,222,132 | 7,680 +   | 1 |
| GenelD:67037    | Pmf1          | 3 | 88,394,143 | 88,410,316 | 16,173 -  | 1 |
| GenelD:229517   | Slc25a44      | 3 | 88,410,495 | 88,425,139 | 14,644 -  | 1 |
| GenelD:16905    | Lmna          | 3 | 88,481,149 | 88,503,332 | 22,183 -  | 2 |
| GenelD:72640    | Mex3a         | 3 | 88,532,395 | 88,541,394 | 8,999 +   | 3 |
| GenelD:10031680 | Mir1905       | 3 | 88,536,301 | 88,536,382 | 81 -      | 3 |
| GenelD:53868    | Rab25         | 3 | 88,542,029 | 88,548,279 | 6,250 -   | 4 |
| GenelD:83409    | Lamtor2       | 3 | 88,549,819 | 88,552,927 | 3,108 -   | 1 |
| GenelD:94232    | Ubqln4        | 3 | 88,553,716 | 88,569,725 | 16,009 +  | 1 |
| GenelD:16800    | Arhgef2       | 3 | 88,616,207 | 88,648,052 | 31,845 +  | 1 |
| GenelD:74200    | 2810403A07Rik | 3 | 88,685,794 | 88,712,933 | 27,139 +  | 1 |
| GenelD:65111    | Dap3          | 3 | 88,920,803 | 88,950,282 | 29,479 -  | 1 |
| GenelD:192195   | Ash1l         | 3 | 88,965,812 | 89,079,375 | 113,563 + | 1 |
| GenelD:72296    | Rusc1         | 3 | 89,083,977 | 89,093,363 | 9,386 -   | 1 |
| GenelD:110196   | Fdps          | 3 | 89,093,588 | 89,101,967 | 8,379 -   | 1 |
| GenelD:12748    | Clk2          | 3 | 89,164,805 | 89,177,087 | 12,282 +  | 2 |

|                 |               |   |            |            |           |   |
|-----------------|---------------|---|------------|------------|-----------|---|
| GenelD:24045    | Scamp3        | 3 | 89,177,485 | 89,182,770 | 5,285 +   | 2 |
| GenelD:68521    | Fam189b       | 3 | 89,183,225 | 89,189,289 | 6,064 +   | 2 |
| GenelD:14466    | Gba           | 3 | 89,202,928 | 89,208,681 | 5,753 +   | 1 |
| GenelD:17827    | Mtx1          | 3 | 89,209,081 | 89,214,335 | 5,254 -   | 1 |
| GenelD:21827    | Thbs3         | 3 | 89,215,187 | 89,226,837 | 11,650 +  | 1 |
| GenelD:68563    | Dpm3          | 3 | 89,266,552 | 89,267,077 | 525 +     | 1 |
| GenelD:19729    | Slc50a1       | 3 | 89,268,246 | 89,270,570 | 2,324 -   | 1 |
| GenelD:13636    | Efna1         | 3 | 89,271,730 | 89,280,951 | 9,221 -   | 2 |
| GenelD:13638    | Efna3         | 3 | 89,314,951 | 89,322,879 | 7,928 -   | 1 |
| GenelD:10003841 | Gm15998       | 3 | 89,315,439 | 89,318,907 | 3,468 +   | 1 |
| GenelD:13639    | Efna4         | 3 | 89,333,393 | 89,338,028 | 4,635 -   | 1 |
| GenelD:10004889 | 4731419I09Rik | 3 | 89,337,850 | 89,347,831 | 9,981 +   | 1 |
| GenelD:11490    | Adam15        | 3 | 89,339,640 | 89,350,010 | 10,370 -  | 1 |
| GenelD:22724    | Zbtb7b        | 3 | 89,377,646 | 89,393,203 | 15,557 -  | 1 |
| GenelD:545539   | Gm15417       | 3 | 89,391,864 | 89,398,779 | 6,915 +   | 1 |
| GenelD:57275    | Lenep         | 3 | 89,401,896 | 89,402,650 | 754 -     | 1 |
| GenelD:20416    | Shc1          | 3 | 89,418,551 | 89,430,029 | 11,478 +  | 1 |
| GenelD:68911    | Pygo2         | 3 | 89,430,837 | 89,435,128 | 4,291 +   | 1 |
| GenelD:229534   | Pbxip1        | 3 | 89,436,704 | 89,450,952 | 14,248 +  | 1 |
| GenelD:140493   | Kcnn3         | 3 | 89,520,164 | 89,672,494 | 152,330 + | 1 |
| GenelD:56417    | Adar          | 3 | 89,715,022 | 89,753,455 | 38,433 +  | 1 |
| GenelD:11444    | Chrn2         | 3 | 89,753,448 | 89,764,632 | 11,184 -  | 3 |
| GenelD:70093    | Ube2q1        | 3 | 89,773,609 | 89,783,997 | 10,388 +  | 3 |
| GenelD:214547   | She           | 3 | 89,831,370 | 89,858,846 | 27,476 +  | 1 |
| GenelD:16194    | Il6ra         | 3 | 89,869,324 | 89,913,162 | 43,838 -  | 1 |
| GenelD:54667    | Atp8b2        | 3 | 89,939,481 | 89,963,332 | 23,851 -  | 1 |
| GenelD:10012448 | Mir190b       | 3 | 90,070,020 | 90,070,099 | 79 +      | 1 |
| GenelD:59069    | Tpm3          | 3 | 90,072,651 | 90,100,902 | 28,251 +  | 1 |
| GenelD:74343    | Crtc2         | 3 | 90,254,281 | 90,264,125 | 9,844 +   | 1 |
| GenelD:229541   | Dennd4b       | 3 | 90,266,534 | 90,280,665 | 14,131 +  | 1 |
| GenelD:26568    | Slc27a3       | 3 | 90,385,233 | 90,389,927 | 4,694 -   | 1 |
| GenelD:229543   | Ints3         | 3 | 90,391,380 | 90,433,636 | 42,256 -  | 1 |
| GenelD:18160    | Npr1          | 3 | 90,450,592 | 90,465,866 | 15,274 -  | 1 |
| GenelD:67781    | Ilf2          | 3 | 90,476,201 | 90,488,379 | 12,178 +  | 1 |
| GenelD:20615    | Snapin        | 3 | 90,488,026 | 90,491,013 | 2,987 -   | 1 |
| GenelD:66511    | Chtop         | 3 | 90,498,958 | 90,509,443 | 10,485 -  | 2 |
| GenelD:20193    | S100a1        | 3 | 90,511,034 | 90,514,330 | 3,296 -   | 1 |
| GenelD:20196    | S100a13       | 3 | 90,514,435 | 90,524,581 | 10,146 +  | 1 |
| GenelD:271944   | C2cd4d        | 3 | 94,362,444 | 94,364,567 | 2,123 +   | 1 |
| GenelD:19885    | Rorc          | 3 | 94,372,826 | 94,398,239 | 25,413 +  | 1 |
| GenelD:76742    | Snx27         | 3 | 94,497,544 | 94,582,702 | 85,158 -  | 1 |
| GenelD:229584   | Pogz          | 3 | 94,837,567 | 94,883,569 | 46,002 +  | 1 |
| GenelD:19172    | Psmb4         | 3 | 94,884,324 | 94,886,958 | 2,634 -   | 1 |
| GenelD:107650   | Pi4kb         | 3 | 94,974,731 | 95,006,843 | 32,112 +  | 1 |
| GenelD:18720    | Pip5k1a       | 3 | 95,059,595 | 95,106,858 | 47,263 -  | 2 |
| GenelD:21427    | Vps72         | 3 | 95,111,042 | 95,123,051 | 12,009 +  | 2 |
| GenelD:20360    | Sema6c        | 3 | 95,164,374 | 95,173,316 | 8,942 +   | 3 |

|                 |               |   |             |             |           |   |
|-----------------|---------------|---|-------------|-------------|-----------|---|
| GenelD:213054   | Gabpb2        | 3 | 95,181,766  | 95,217,942  | 36,176 -  | 1 |
| GenelD:56772    | Mllt11        | 3 | 95,218,544  | 95,228,677  | 10,133 -  | 1 |
| GenelD:57912    | Cdc42se1      | 3 | 95,228,780  | 95,236,409  | 7,629 +   | 1 |
| GenelD:229588   | Gm128         | 3 | 95,236,920  | 95,241,109  | 4,189 -   | 1 |
| GenelD:71790    | Anxa9         | 3 | 95,296,093  | 95,307,176  | 11,083 -  | 1 |
| GenelD:76193    | 6330562C20Rik | 3 | 95,307,672  | 95,315,117  | 7,445 -   | 1 |
| GenelD:76893    | Cers2         | 3 | 95,315,252  | 95,323,570  | 8,318 +   | 1 |
| GenelD:84505    | Setdb1        | 3 | 95,323,525  | 95,357,202  | 33,677 -  | 1 |
| GenelD:10004330 | Gm4349        | 3 | 95,427,349  | 95,431,085  | 3,736 +   | 1 |
| GenelD:11863    | Arnt          | 3 | 95,434,390  | 95,497,240  | 62,850 +  | 1 |
| GenelD:17210    | Mcl1          | 3 | 95,658,721  | 95,663,179  | 4,458 +   | 1 |
| GenelD:66471    | Anp32e        | 3 | 95,929,257  | 95,947,387  | 18,130 +  | 1 |
| GenelD:668224   | Gm9054        | 3 | 95,985,510  | 95,986,967  | 1,457 +   | 1 |
| GenelD:67220    | Plekho1       | 3 | 95,988,828  | 95,995,839  | 7,011 -   | 1 |
| GenelD:22365    | Vps45         | 3 | 95,999,832  | 96,058,455  | 58,623 -  | 1 |
| GenelD:229603   | Otud7b        | 3 | 96,104,527  | 96,161,129  | 56,602 +  | 1 |
| GenelD:621893   | Hist2h2ab     | 3 | 96,219,916  | 96,220,308  | 392 +     | 1 |
| GenelD:319176   | Hist2h2ac     | 3 | 96,220,455  | 96,220,844  | 389 -     | 1 |
| GenelD:319190   | Hist2h2be     | 3 | 96,221,121  | 96,223,738  | 2,617 +   | 1 |
| GenelD:10003846 | Gm15441       | 3 | 96,555,768  | 96,566,801  | 11,033 -  | 1 |
| GenelD:56338    | Txnip         | 3 | 96,557,957  | 96,561,857  | 3,900 +   | 1 |
| GenelD:280411   | Lix1l         | 3 | 96,601,133  | 96,625,352  | 24,219 +  | 1 |
| GenelD:60365    | Rbm8a         | 3 | 96,629,928  | 96,633,791  | 3,863 +   | 1 |
| GenelD:18632    | Pex11b        | 3 | 96,635,357  | 96,645,381  | 10,024 +  | 1 |
| GenelD:213119   | Itga10        | 3 | 96,645,584  | 96,664,519  | 18,935 +  | 1 |
| GenelD:213121   | Ankrd35       | 3 | 96,670,131  | 96,691,034  | 20,903 +  | 1 |
| GenelD:229615   | Pias3         | 3 | 96,696,375  | 96,706,070  | 9,695 +   | 1 |
| GenelD:78373    | Nudt17        | 3 | 96,705,892  | 96,708,560  | 2,668 -   | 1 |
| GenelD:74414    | Polr3c        | 3 | 96,711,895  | 96,727,439  | 15,544 -  | 1 |
| GenelD:67845    | Rnf115        | 3 | 96,727,611  | 96,791,155  | 63,544 +  | 1 |
| GenelD:67549    | Gpr89         | 3 | 96,871,066  | 96,905,298  | 34,232 -  | 1 |
| GenelD:66659    | Acp6          | 3 | 97,158,777  | 97,176,576  | 17,799 +  | 1 |
| GenelD:68058    | Chd1l         | 3 | 97,560,748  | 97,610,190  | 49,442 -  | 1 |
| GenelD:83679    | Pde4dip       | 3 | 97,689,828  | 97,888,707  | 198,879 - | 1 |
| GenelD:20333    | Sec22b        | 3 | 97,901,227  | 97,922,318  | 21,091 +  | 1 |
| GenelD:18129    | Notch2        | 3 | 98,013,538  | 98,150,367  | 136,829 + | 1 |
| GenelD:242109   | Zfp697        | 3 | 98,382,481  | 98,431,949  | 49,468 +  | 3 |
| GenelD:70560    | Wars2         | 3 | 99,141,090  | 99,220,203  | 79,113 +  | 1 |
| GenelD:269470   | Wdr3          | 3 | 100,138,180 | 100,162,403 | 24,223 -  | 1 |
| GenelD:14547    | Gdap2         | 3 | 100,162,518 | 100,206,981 | 44,463 +  | 1 |
| GenelD:74645    | Fam46c        | 3 | 100,471,536 | 100,489,192 | 17,656 -  | 1 |
| GenelD:545557   | Gm12474       | 3 | 100,489,397 | 100,523,918 | 34,521 +  | 1 |
| GenelD:17156    | Man1a2        | 3 | 100,562,203 | 100,685,473 | 123,270 - | 1 |
| GenelD:19221    | Ptgfrn        | 3 | 101,040,236 | 101,110,166 | 69,930 -  | 1 |
| GenelD:11928    | Atp1a1        | 3 | 101,576,219 | 101,604,707 | 28,488 -  | 1 |
| GenelD:242126   | Slc22a15      | 3 | 101,855,768 | 101,924,453 | 68,685 -  | 1 |
| GenelD:229658   | Vangl1        | 3 | 102,156,695 | 102,204,693 | 47,998 -  | 1 |

|                 |               |   |             |             |           |   |
|-----------------|---------------|---|-------------|-------------|-----------|---|
| GenelD:66641    | Sike1         | 3 | 102,995,740 | 103,003,914 | 8,174 +   | 1 |
| GenelD:229665   | Ampd1         | 3 | 103,074,014 | 103,099,720 | 25,706 +  | 1 |
| GenelD:94093    | Trim33        | 3 | 103,279,293 | 103,358,768 | 79,475 +  | 1 |
| GenelD:15257    | Hipk1         | 3 | 103,739,815 | 103,791,275 | 51,460 -  | 1 |
| GenelD:140917   | Dclre1b       | 3 | 103,800,605 | 103,809,387 | 8,782 -   | 2 |
| GenelD:10050315 | Gm15471       | 3 | 103,803,129 | 103,808,440 | 5,311 +   | 1 |
| GenelD:67489    | Ap4b1         | 3 | 103,809,517 | 103,822,025 | 12,508 +  | 1 |
| GenelD:19260    | Ptpn22        | 3 | 103,860,292 | 103,912,247 | 51,955 +  | 1 |
| GenelD:229675   | Rsbm1         | 3 | 103,914,120 | 103,966,620 | 52,500 +  | 2 |
| GenelD:10012593 | A130049A11Rik | 3 | 103,964,536 | 103,968,316 | 3,780 -   | 1 |
| GenelD:18685    | Phtf1         | 3 | 103,968,110 | 104,007,490 | 39,380 +  | 1 |
| GenelD:99470    | Magi3         | 3 | 104,013,259 | 104,220,406 | 207,147 - | 1 |
| GenelD:269473   | Lrig2         | 3 | 104,453,983 | 104,511,856 | 57,873 -  | 1 |
| GenelD:20501    | Slc16a1       | 3 | 104,638,668 | 104,658,462 | 19,794 +  | 1 |
| GenelD:71887    | Ppm1j         | 3 | 104,781,056 | 104,786,018 | 4,962 +   | 1 |
| GenelD:11853    | Rhoc          | 3 | 104,789,034 | 104,794,459 | 5,425 +   | 1 |
| GenelD:17454    | Mov10         | 3 | 104,794,832 | 104,818,563 | 23,731 -  | 2 |
| GenelD:12340    | Capza1        | 3 | 104,822,785 | 104,864,505 | 41,720 -  | 2 |
| GenelD:229681   | St7l          | 3 | 104,864,506 | 104,930,064 | 65,558 +  | 1 |
| GenelD:22414    | Wnt2b         | 3 | 104,944,805 | 104,961,709 | 16,904 -  | 1 |
| GenelD:78635    | 1700095B22Rik | 3 | 105,448,190 | 105,452,955 | 4,765 -   | 1 |
| GenelD:56543    | Kcnd3         | 3 | 105,452,330 | 105,674,002 | 221,672 + | 1 |
| GenelD:53975    | Ddx20         | 3 | 105,678,462 | 105,687,571 | 9,109 -   | 1 |
| GenelD:99712    | Cept1         | 3 | 106,502,260 | 106,547,761 | 45,501 -  | 1 |
| GenelD:67171    | Dram2         | 3 | 106,547,827 | 106,574,845 | 27,018 +  | 1 |
| GenelD:16491    | Kcna3         | 3 | 107,036,162 | 107,038,129 | 1,967 +   | 1 |
| GenelD:229694   | AI504432      | 3 | 107,039,504 | 107,054,322 | 14,818 +  | 1 |
| GenelD:68576    | Lamtor5       | 3 | 107,278,858 | 107,284,082 | 5,224 +   | 1 |
| GenelD:99738    | Kcnc4         | 3 | 107,438,303 | 107,458,898 | 20,595 -  | 1 |
| GenelD:229706   | Slc6a17       | 3 | 107,467,548 | 107,518,018 | 50,470 -  | 1 |
| GenelD:229707   | Strip1        | 3 | 107,612,532 | 107,631,710 | 19,178 -  | 1 |
| GenelD:12977    | Csf1          | 3 | 107,741,048 | 107,760,469 | 19,421 -  | 1 |
| GenelD:109674   | Ampd2         | 3 | 108,074,062 | 108,086,627 | 12,565 -  | 1 |
| GenelD:14686    | Gnat2         | 3 | 108,093,068 | 108,101,286 | 8,218 +   | 1 |
| GenelD:75504    | 1700013F07Rik | 3 | 108,537,584 | 108,544,697 | 7,113 +   | 1 |
| GenelD:10021743 | Scarna2       | 3 | 108,554,342 | 108,554,402 | 60 -      | 1 |
| GenelD:67495    | Tmem167b      | 3 | 108,556,425 | 108,562,466 | 6,041 -   | 1 |
| GenelD:99730    | Taf13         | 3 | 108,571,699 | 108,582,068 | 10,369 +  | 1 |
| GenelD:99512    | Wdr47         | 3 | 108,591,278 | 108,645,719 | 54,441 +  | 2 |
| GenelD:229725   | Clcc1         | 3 | 108,653,913 | 108,678,840 | 24,927 +  | 1 |
| GenelD:20912    | Stxbp3a       | 3 | 108,793,180 | 108,840,502 | 47,322 -  | 1 |
| GenelD:66921    | Prpf38b       | 3 | 108,902,807 | 108,911,704 | 8,897 -   | 1 |
| GenelD:10105574 | LOC101055747  | 3 | 108,939,873 | 108,941,256 | 1,383 -   | 1 |
| GenelD:66715    | Henmt1        | 3 | 108,940,084 | 108,960,776 | 20,692 +  | 1 |
| GenelD:329739   | Fam102b       | 3 | 108,970,997 | 109,027,607 | 56,610 -  | 1 |
| GenelD:57257    | Vav3          | 3 | 109,340,683 | 109,685,694 | 345,011 + | 1 |
| GenelD:99890    | Prmt6         | 3 | 110,246,109 | 110,250,998 | 4,889 -   | 1 |

|               |               |   |             |             |           |   |
|---------------|---------------|---|-------------|-------------|-----------|---|
| GenelD:66500  | Slc30a7       | 3 | 115,938,973 | 116,007,406 | 68,433 -  | 1 |
| GenelD:58193  | Extl2         | 3 | 116,007,449 | 116,029,016 | 21,567 +  | 1 |
| GenelD:64378  | Gpr88         | 3 | 116,249,654 | 116,253,484 | 3,830 -   | 1 |
| GenelD:229776 | Cdc14a        | 3 | 116,272,553 | 116,424,032 | 151,479 - | 1 |
| GenelD:229780 | Trmt13        | 3 | 116,581,336 | 116,614,587 | 33,251 -  | 1 |
| GenelD:72776  | Sass6         | 3 | 116,595,008 | 116,630,984 | 35,976 +  | 1 |
| GenelD:15247  | Hiat1         | 3 | 116,631,164 | 116,662,677 | 31,513 -  | 1 |
| GenelD:229782 | Slc35a3       | 3 | 116,670,798 | 116,712,280 | 41,482 -  | 2 |
| GenelD:71994  | Cnn3          | 3 | 121,426,541 | 121,458,205 | 31,664 +  | 1 |
| GenelD:14066  | F3            | 3 | 121,723,537 | 121,735,052 | 11,515 +  | 1 |
| GenelD:19299  | Abcd3         | 3 | 121,758,910 | 121,815,215 | 56,305 -  | 1 |
| GenelD:214137 | Arhgap29      | 3 | 121,953,326 | 122,016,154 | 62,828 +  | 1 |
| GenelD:14630  | Gclm          | 3 | 122,245,592 | 122,266,648 | 21,056 +  | 2 |
| GenelD:99480  | Dnttip2       | 3 | 122,274,414 | 122,285,271 | 10,857 +  | 2 |
| GenelD:791077 | Mir760        | 3 | 122,293,585 | 122,293,703 | 118 -     | 1 |
| GenelD:214459 | Fnbp1l        | 3 | 122,538,719 | 122,619,667 | 80,948 -  | 1 |
| GenelD:242202 | Pde5a         | 3 | 122,729,158 | 122,859,374 | 130,216 + | 1 |
| GenelD:99526  | Usp53         | 3 | 122,933,601 | 122,984,447 | 50,846 -  | 1 |
| GenelD:19142  | Prss12        | 3 | 123,446,913 | 123,506,602 | 59,689 +  | 1 |
| GenelD:229801 | Tram1l1       | 3 | 124,321,037 | 124,323,260 | 2,223 +   | 1 |
| GenelD:108058 | Camk2d        | 3 | 126,596,973 | 126,845,054 | 248,081 + | 1 |
| GenelD:28036  | Larp7         | 3 | 127,536,714 | 127,553,349 | 16,635 -  | 1 |
| GenelD:723948 | Mir302b       | 3 | 127,545,228 | 127,545,301 | 73 +      | 1 |
| GenelD:723835 | Mir302c       | 3 | 127,545,363 | 127,545,430 | 67 +      | 1 |
| GenelD:723920 | Mir302a       | 3 | 127,545,496 | 127,545,564 | 68 +      | 1 |
| GenelD:723928 | Mir302d       | 3 | 127,545,624 | 127,545,689 | 65 +      | 1 |
| GenelD:723911 | Mir367        | 3 | 127,545,733 | 127,545,807 | 74 +      | 1 |
| GenelD:71643  | 4930422G04Rik | 3 | 127,553,489 | 127,618,023 | 64,534 +  | 1 |
| GenelD:211556 | Ap1ar         | 3 | 127,807,264 | 127,837,492 | 30,228 -  | 1 |
| GenelD:18741  | Pitx2         | 3 | 129,199,918 | 129,219,591 | 19,673 +  | 1 |
| GenelD:170439 | Elovl6        | 3 | 129,532,386 | 129,638,495 | 106,109 + | 1 |
| GenelD:20132  | Rrh           | 3 | 129,808,575 | 129,822,505 | 13,930 -  | 1 |
| GenelD:68147  | Gar1          | 3 | 129,824,912 | 129,831,396 | 6,484 -   | 1 |
| GenelD:12630  | Cfi           | 3 | 129,836,739 | 129,875,328 | 38,589 +  | 1 |
| GenelD:68436  | Rpl34         | 3 | 130,726,831 | 130,730,308 | 3,477 -   | 1 |
| GenelD:16842  | Lef1          | 3 | 131,110,471 | 131,223,334 | 112,863 + | 1 |
| GenelD:15107  | Hadh          | 3 | 131,233,424 | 131,272,037 | 38,613 -  | 1 |
| GenelD:56811  | Dkk2          | 3 | 132,085,292 | 132,180,304 | 95,012 +  | 1 |
| GenelD:13722  | Aimp1         | 3 | 132,660,498 | 132,683,879 | 23,381 -  | 1 |
| GenelD:271981 | Tbck          | 3 | 132,684,144 | 132,838,506 | 154,362 + | 1 |
| GenelD:67553  | Gstcd         | 3 | 132,982,550 | 133,091,740 | 109,190 - | 1 |
| GenelD:71793  | Ints12        | 3 | 133,091,953 | 133,110,988 | 19,035 +  | 1 |
| GenelD:229841 | Cenpe         | 3 | 135,212,563 | 135,273,540 | 60,977 +  | 1 |
| GenelD:319587 | 4930539J05Rik | 3 | 135,436,220 | 135,438,665 | 2,445 -   | 2 |
| GenelD:66105  | Ube2d3        | 3 | 135,438,759 | 135,467,178 | 28,419 +  | 2 |
| GenelD:110173 | Manba         | 3 | 135,485,611 | 135,571,404 | 85,793 +  | 1 |
| GenelD:18033  | Nfkb1         | 3 | 135,584,655 | 135,691,547 | 106,892 - | 1 |

|                 |               |   |             |             |           |   |
|-----------------|---------------|---|-------------|-------------|-----------|---|
| GenelD:19055    | Ppp3ca        | 3 | 136,670,770 | 136,935,779 | 265,009 + | 1 |
| GenelD:10105580 | LOC101055801  | 3 | 137,862,589 | 137,864,510 | 1,921 -   | 1 |
| GenelD:51788    | H2afz         | 3 | 137,864,599 | 137,866,922 | 2,323 +   | 1 |
| GenelD:70604    | Dnajb14       | 3 | 137,867,675 | 137,908,931 | 41,256 +  | 1 |
| GenelD:75624    | Metap1        | 3 | 138,458,960 | 138,489,382 | 30,422 -  | 1 |
| GenelD:13684    | Eif4e         | 3 | 138,526,191 | 138,557,599 | 31,408 +  | 1 |
| GenelD:10031670 | Mir1956       | 3 | 138,526,421 | 138,526,485 | 64 +      | 1 |
| GenelD:56224    | Tspan5        | 3 | 138,742,195 | 138,904,424 | 162,229 + | 1 |
| GenelD:229877   | Rap1gds1      | 3 | 138,925,906 | 139,075,199 | 149,293 - | 1 |
| GenelD:433658   | Gm15688       | 3 | 141,457,976 | 141,465,470 | 7,494 -   | 1 |
| GenelD:22253    | Unc5c         | 3 | 141,465,564 | 141,834,922 | 369,358 + | 1 |
| GenelD:229906   | Gtf2b         | 3 | 142,765,247 | 142,783,606 | 18,359 +  | 1 |
| GenelD:109333   | Pkn2          | 3 | 142,790,902 | 142,882,004 | 91,102 -  | 1 |
| GenelD:320229   | 9530052C20Rik | 3 | 142,882,495 | 142,895,070 | 12,575 +  | 1 |
| GenelD:16911    | Lmo4          | 3 | 144,188,530 | 144,205,255 | 16,725 -  | 2 |
| GenelD:23908    | Hs2st1        | 3 | 144,431,107 | 144,570,216 | 139,109 - | 1 |
| GenelD:93684    | Sep15         | 3 | 144,570,427 | 144,597,677 | 27,250 +  | 1 |
| GenelD:229937   | Znhit6        | 3 | 145,576,208 | 145,605,245 | 29,037 +  | 1 |
| GenelD:16007    | Cyr61         | 3 | 145,646,971 | 145,649,985 | 3,014 -   | 1 |
| GenelD:10021634 | Gm17501       | 3 | 145,650,312 | 145,652,473 | 2,161 +   | 1 |
| GenelD:69219    | Ddah1         | 3 | 145,758,692 | 145,894,277 | 135,585 + | 1 |
| GenelD:12042    | Bcl10         | 3 | 145,924,378 | 145,934,283 | 9,905 +   | 2 |
| GenelD:66421    | 2410004B18Rik | 3 | 145,938,032 | 145,944,275 | 6,243 +   | 1 |
| GenelD:214804   | Syde2         | 3 | 145,987,870 | 146,021,720 | 33,850 +  | 1 |
| GenelD:70951    | Spata1        | 3 | 146,457,203 | 146,499,753 | 42,550 -  | 1 |
| GenelD:14707    | Gng5          | 3 | 146,499,836 | 146,505,543 | 5,707 +   | 1 |
| GenelD:70285    | Rpf1          | 3 | 146,506,344 | 146,521,423 | 15,079 -  | 1 |
| GenelD:70892    | Ttll7         | 3 | 146,852,367 | 146,982,750 | 130,383 + | 1 |
| GenelD:67035    | Dnajb4        | 3 | 152,183,955 | 152,210,299 | 26,344 -  | 1 |
| GenelD:51886    | Fubp1         | 3 | 152,210,458 | 152,236,830 | 26,372 +  | 1 |
| GenelD:215708   | Fam73a        | 3 | 152,273,459 | 152,340,407 | 66,948 -  | 2 |
| GenelD:170822   | Usp33         | 3 | 152,346,478 | 152,393,617 | 47,139 +  | 3 |
| GenelD:108946   | Zzz3          | 3 | 152,396,010 | 152,462,826 | 66,816 +  | 1 |
| GenelD:209584   | Tyw3          | 3 | 154,576,520 | 154,597,098 | 20,578 -  | 1 |
| GenelD:12972    | Cryz          | 3 | 154,596,711 | 154,623,182 | 26,471 +  | 1 |
| GenelD:19218    | Ptger3        | 3 | 157,566,892 | 157,644,758 | 77,866 +  | 1 |
| GenelD:433667   | Ankrd13c      | 3 | 157,947,466 | 158,006,837 | 59,371 +  | 1 |
| GenelD:69207    | Srsf11        | 3 | 158,010,493 | 158,036,639 | 26,146 -  | 1 |
| GenelD:67144    | Lrrc40        | 3 | 158,036,703 | 158,068,478 | 31,775 +  | 1 |
| GenelD:67427    | Rps20         | 4 | 3,834,473   | 3,835,600   | 1,127 -   | 1 |
| GenelD:56711    | Plag1         | 4 | 3,901,158   | 3,938,405   | 37,247 -  | 1 |
| GenelD:66433    | Chchd7        | 4 | 3,938,888   | 3,943,526   | 4,638 +   | 1 |
| GenelD:242291   | Impad1        | 4 | 4,764,342   | 4,793,306   | 28,964 -  | 1 |
| GenelD:53378    | Sdcbp         | 4 | 6,365,680   | 6,396,122   | 30,442 +  | 1 |
| GenelD:59021    | Rab2a         | 4 | 8,535,644   | 8,607,702   | 72,058 +  | 1 |
| GenelD:65973    | Asph          | 4 | 9,449,085   | 9,669,162   | 220,077 - | 1 |
| GenelD:242316   | Gdf6          | 4 | 9,844,372   | 9,862,345   | 17,973 +  | 1 |



|                 |               |   |            |            |           |   |
|-----------------|---------------|---|------------|------------|-----------|---|
| GenelD:67157    | 2610301B20Rik | 4 | 10,874,498 | 10,899,425 | 24,927 +  | 1 |
| GenelD:71801    | Plekhf2       | 4 | 10,988,662 | 11,007,619 | 18,957 -  | 1 |
| GenelD:76947    | Ndufaf6       | 4 | 11,051,045 | 11,076,204 | 25,159 -  | 1 |
| GenelD:60599    | Trp53inp1     | 4 | 11,156,441 | 11,174,377 | 17,936 +  | 1 |
| GenelD:12448    | Ccne2         | 4 | 11,191,354 | 11,204,779 | 13,425 +  | 1 |
| GenelD:72656    | Ints8         | 4 | 11,199,158 | 11,254,259 | 55,101 -  | 2 |
| GenelD:381510   | Dpy19l4       | 4 | 11,265,079 | 11,322,131 | 57,052 -  | 1 |
| GenelD:207920   | Esrp1         | 4 | 11,332,038 | 11,386,783 | 54,745 -  | 1 |
| GenelD:381511   | Pdp1          | 4 | 11,958,185 | 11,966,450 | 8,265 -   | 1 |
| GenelD:10050363 | 1700123M08Rik | 4 | 11,966,574 | 11,994,295 | 27,721 +  | 1 |
| GenelD:68099    | Fam92a        | 4 | 12,153,722 | 12,172,015 | 18,293 -  | 1 |
| GenelD:12395    | Runx1t1       | 4 | 13,743,302 | 13,893,649 | 150,347 + | 1 |
| GenelD:100201   | Tmem64        | 4 | 15,265,820 | 15,286,753 | 20,933 +  | 1 |
| GenelD:27354    | Nbn           | 4 | 15,957,967 | 15,992,589 | 34,622 +  | 1 |
| GenelD:209212   | Osgin2        | 4 | 15,997,121 | 16,013,877 | 16,756 -  | 1 |
| GenelD:192656   | Ripk2         | 4 | 16,123,375 | 16,163,498 | 40,123 -  | 1 |
| GenelD:10041591 | A530072M11Rik | 4 | 16,164,110 | 16,266,225 | 102,115 + | 1 |
| GenelD:107568   | Wwp1          | 4 | 19,607,248 | 19,709,000 | 101,752 - | 1 |
| GenelD:74988    | 4930480G23Rik | 4 | 19,979,445 | 20,005,739 | 26,294 -  | 1 |
| GenelD:50500    | Ttpa          | 4 | 20,008,428 | 20,030,785 | 22,357 +  | 1 |
| GenelD:269513   | Nkain3        | 4 | 20,243,847 | 20,778,668 | 534,821 - | 1 |
| GenelD:230025   | Prdm13        | 4 | 21,677,480 | 21,685,963 | 8,483 -   | 1 |
| GenelD:51813    | Ccnc          | 4 | 21,727,703 | 21,750,546 | 22,843 +  | 1 |
| GenelD:269514   | Fbxl4         | 4 | 22,357,565 | 22,434,046 | 76,481 +  | 1 |
| GenelD:212377   | Mms22l        | 4 | 24,496,462 | 24,602,950 | 106,488 + | 1 |
| GenelD:68493    | Ndufaf4       | 4 | 24,898,083 | 24,905,001 | 6,918 +   | 1 |
| GenelD:14348    | Fut9          | 4 | 25,609,333 | 25,800,003 | 190,670 - | 1 |
| GenelD:242362   | Manea         | 4 | 26,324,506 | 26,346,652 | 22,146 -  | 1 |
| GenelD:13841    | Epha7         | 4 | 28,813,145 | 28,967,499 | 154,354 + | 2 |
| GenelD:26409    | Map3k7        | 4 | 31,964,107 | 32,023,467 | 59,360 +  | 1 |
| GenelD:10105616 | LOC101056168  | 4 | 32,239,435 | 32,240,600 | 1,165 +   | 1 |
| GenelD:10003865 | D130062J21Rik | 4 | 32,243,733 | 32,246,476 | 2,743 +   | 1 |
| GenelD:26885    | Casp8ap2      | 4 | 32,615,473 | 32,653,265 | 37,792 +  | 1 |
| GenelD:100019   | Mdn1          | 4 | 32,657,119 | 32,775,217 | 118,098 + | 1 |
| GenelD:52187    | Rragd         | 4 | 32,982,998 | 33,022,180 | 39,182 +  | 2 |
| GenelD:10050416 | 4933421O10Rik | 4 | 33,027,139 | 33,031,323 | 4,184 -   | 1 |
| GenelD:56228    | Ube2j1        | 4 | 33,031,425 | 33,052,364 | 20,939 +  | 1 |
| GenelD:272009   | Srsf12        | 4 | 33,208,991 | 33,233,340 | 24,349 +  | 1 |
| GenelD:108767   | Pnrc1         | 4 | 33,245,423 | 33,248,787 | 3,364 -   | 1 |
| GenelD:12801    | Cnr1          | 4 | 33,924,632 | 33,948,831 | 24,199 +  | 1 |
| GenelD:50793    | Orc3          | 4 | 34,566,781 | 34,614,942 | 48,161 -  | 1 |
| GenelD:109093   | Rars2         | 4 | 34,614,958 | 34,660,167 | 45,209 +  | 1 |
| GenelD:24060    | Slc35a1       | 4 | 34,663,257 | 34,687,438 | 24,181 -  | 1 |
| GenelD:30046    | Zfp292        | 4 | 34,803,110 | 34,882,948 | 79,838 -  | 1 |
| GenelD:106021   | Topors        | 4 | 40,259,606 | 40,269,841 | 10,235 -  | 1 |
| GenelD:10050430 | 2010003O02Rik | 4 | 40,269,579 | 40,270,221 | 642 +     | 1 |
| GenelD:230075   | Ndufb6        | 4 | 40,270,663 | 40,279,368 | 8,705 -   | 1 |

|                 |               |   |            |            |           |   |
|-----------------|---------------|---|------------|------------|-----------|---|
| GenelD:622208   | Gm6297        | 4 | 40,720,156 | 40,722,413 | 2,257 -   | 1 |
| GenelD:15502    | Dnaja1        | 4 | 40,722,468 | 40,737,153 | 14,685 +  | 1 |
| GenelD:387203   | Mir207        | 4 | 40,722,917 | 40,722,995 | 78 +      | 1 |
| GenelD:74255    | Smu1          | 4 | 40,735,649 | 40,757,885 | 22,236 -  | 1 |
| GenelD:14595    | B4galt1       | 4 | 40,804,602 | 40,853,998 | 49,396 -  | 1 |
| GenelD:10062861 | Mir5123       | 4 | 40,850,056 | 40,850,138 | 82 -      | 1 |
| GenelD:76959    | Chmp5         | 4 | 40,948,553 | 40,965,302 | 16,749 +  | 1 |
| GenelD:74164    | Nfx1          | 4 | 40,970,943 | 41,025,992 | 55,049 +  | 1 |
| GenelD:68970    | Dcaf12        | 4 | 41,291,300 | 41,314,901 | 23,601 -  | 1 |
| GenelD:109242   | Kif24         | 4 | 41,390,748 | 41,464,848 | 74,100 -  | 1 |
| GenelD:66401    | Nudt2         | 4 | 41,465,148 | 41,480,926 | 15,778 +  | 1 |
| GenelD:329828   | Al464131      | 4 | 41,495,601 | 41,503,075 | 7,474 -   | 1 |
| GenelD:73721    | 1110017D15Rik | 4 | 41,505,009 | 41,517,333 | 12,324 -  | 1 |
| GenelD:71901    | Fam219a       | 4 | 41,518,929 | 41,569,527 | 50,598 -  | 1 |
| GenelD:68922    | Dnaic1        | 4 | 41,569,794 | 41,638,158 | 68,364 +  | 1 |
| GenelD:69961    | Rpp25l        | 4 | 41,712,033 | 41,713,517 | 1,484 -   | 1 |
| GenelD:53598    | Dctn3         | 4 | 41,714,798 | 41,723,163 | 8,365 -   | 1 |
| GenelD:550619   | Arid3c        | 4 | 41,723,836 | 41,731,142 | 7,306 -   | 1 |
| GenelD:14430    | Galt          | 4 | 41,755,253 | 41,759,125 | 3,872 +   | 1 |
| GenelD:16157    | Il11ra1       | 4 | 41,760,443 | 41,769,473 | 9,030 +   | 1 |
| GenelD:269523   | Vcp           | 4 | 42,979,964 | 43,000,507 | 20,543 -  | 1 |
| GenelD:60534    | Fancg         | 4 | 43,002,337 | 43,010,301 | 7,964 -   | 1 |
| GenelD:22249    | Unc13b        | 4 | 43,058,984 | 43,264,887 | 205,903 + | 1 |
| GenelD:320571   | Atp8b5        | 4 | 43,267,159 | 43,373,831 | 106,672 + | 1 |
| GenelD:100213   | Rusc2         | 4 | 43,381,982 | 43,427,086 | 45,104 +  | 3 |
| GenelD:329831   | Fam166b       | 4 | 43,427,020 | 43,429,134 | 2,114 -   | 2 |
| GenelD:230099   | Car9          | 4 | 43,507,026 | 43,513,725 | 6,699 +   | 2 |
| GenelD:22004    | Tpm2          | 4 | 43,514,712 | 43,523,388 | 8,676 -   | 2 |
| GenelD:21894    | Tln1          | 4 | 43,531,513 | 43,562,583 | 31,070 -  | 2 |
| GenelD:12913    | Creb3         | 4 | 43,562,634 | 43,567,060 | 4,426 +   | 1 |
| GenelD:230101   | Gba2          | 4 | 43,566,928 | 43,578,864 | 11,936 -  | 2 |
| GenelD:242406   | Rgp1          | 4 | 43,578,735 | 43,587,487 | 8,752 +   | 1 |
| GenelD:10003967 | Msmg          | 4 | 43,583,216 | 43,584,494 | 1,278 -   | 1 |
| GenelD:10003845 | Gm12472       | 4 | 43,587,504 | 43,589,141 | 1,637 +   | 1 |
| GenelD:230103   | Npr2          | 4 | 43,631,935 | 43,651,244 | 19,309 +  | 2 |
| GenelD:433700   | Spag8         | 4 | 43,651,729 | 43,653,552 | 1,823 -   | 1 |
| GenelD:68917    | Hint2         | 4 | 43,654,227 | 43,656,445 | 2,218 -   | 1 |
| GenelD:242408   | Fam221b       | 4 | 43,659,622 | 43,668,859 | 9,237 -   | 1 |
| GenelD:10050383 | Gm12481       | 4 | 43,663,916 | 43,664,413 | 497 +     | 1 |
| GenelD:53614    | Reck          | 4 | 43,875,530 | 43,944,806 | 69,276 +  | 1 |
| GenelD:12757    | Clta          | 4 | 44,012,643 | 44,032,846 | 20,203 +  | 1 |
| GenelD:50798    | Gne           | 4 | 44,034,075 | 44,084,177 | 50,102 -  | 1 |
| GenelD:73469    | Rnf38         | 4 | 44,126,212 | 44,168,283 | 42,071 -  | 1 |
| GenelD:18507    | Pax5          | 4 | 44,531,506 | 44,710,440 | 178,934 - | 1 |
| GenelD:70602    | 5730488B01Rik | 4 | 44,702,800 | 44,705,110 | 2,310 +   | 1 |
| GenelD:545618   | Gm12463       | 4 | 44,752,132 | 44,753,182 | 1,050 -   | 1 |
| GenelD:319885   | Zcchc7        | 4 | 44,756,559 | 44,932,215 | 175,656 + | 1 |

|                 |               |   |            |            |           |   |
|-----------------|---------------|---|------------|------------|-----------|---|
| GenelD:76238    | Grhpr         | 4 | 44,981,411 | 44,990,696 | 9,285 +   | 1 |
| GenelD:230119   | Zbtb5         | 4 | 44,991,242 | 45,012,412 | 21,170 -  | 3 |
| GenelD:73405    | 1700055D18Rik | 4 | 45,012,822 | 45,014,399 | 1,577 +   | 2 |
| GenelD:64424    | Polr1e        | 4 | 45,018,625 | 45,033,692 | 15,067 +  | 2 |
| GenelD:269529   | Fbxo10        | 4 | 45,034,248 | 45,084,604 | 50,356 -  | 1 |
| GenelD:68512    | Tomm5         | 4 | 45,105,209 | 45,108,113 | 2,904 -   | 1 |
| GenelD:69934    | Trmt10b       | 4 | 45,297,168 | 45,316,131 | 18,963 +  | 1 |
| GenelD:66362    | Exosc3        | 4 | 45,316,629 | 45,320,603 | 3,974 -   | 1 |
| GenelD:242418   | Dcaf10        | 4 | 45,342,101 | 45,379,722 | 37,621 +  | 1 |
| GenelD:230126   | Shb           | 4 | 45,423,276 | 45,530,828 | 107,552 - | 1 |
| GenelD:272027   | Tstd2         | 4 | 46,114,746 | 46,138,475 | 23,729 -  | 1 |
| GenelD:433702   | Ncbp1         | 4 | 46,138,511 | 46,172,403 | 33,892 +  | 1 |
| GenelD:22590    | Xpa           | 4 | 46,175,222 | 46,196,311 | 21,089 -  | 1 |
| GenelD:67628    | Anp32b        | 4 | 46,451,117 | 46,472,523 | 21,406 +  | 2 |
| GenelD:94181    | Nans          | 4 | 46,489,329 | 46,503,438 | 14,109 +  | 1 |
| GenelD:74735    | Trim14        | 4 | 46,506,847 | 46,536,144 | 29,297 -  | 1 |
| GenelD:381605   | Tbc1d2        | 4 | 46,604,390 | 46,650,199 | 45,809 -  | 1 |
| GenelD:12819    | Col15a1       | 4 | 47,208,012 | 47,313,165 | 105,153 + | 1 |
| GenelD:21812    | Tgfbr1        | 4 | 47,353,305 | 47,414,924 | 61,619 +  | 1 |
| GenelD:56737    | Alg2          | 4 | 47,469,833 | 47,474,367 | 4,534 -   | 1 |
| GenelD:66212    | Sec61b        | 4 | 47,474,661 | 47,483,233 | 8,572 +   | 1 |
| GenelD:10105565 | LOC101055654  | 4 | 48,041,257 | 48,045,089 | 3,832 -   | 2 |
| GenelD:18124    | Nr4a3         | 4 | 48,051,248 | 48,083,352 | 32,104 +  | 2 |
| GenelD:269536   | Tex10         | 4 | 48,430,956 | 48,473,422 | 42,466 -  | 1 |
| GenelD:230157   | Tmeff1        | 4 | 48,585,193 | 48,663,131 | 77,938 +  | 1 |
| GenelD:67063    | Tmem246       | 4 | 49,584,506 | 49,597,870 | 13,364 -  | 1 |
| GenelD:72648    | 2700081L22Rik | 4 | 52,430,284 | 52,438,964 | 8,680 -   | 1 |
| GenelD:14211    | Smc2          | 4 | 52,439,249 | 52,488,260 | 49,011 +  | 1 |
| GenelD:11303    | Abca1         | 4 | 53,030,789 | 53,159,895 | 129,106 - | 1 |
| GenelD:100434   | Slc44a1       | 4 | 53,440,413 | 53,622,478 | 182,065 + | 1 |
| GenelD:319636   | Fsd1l         | 4 | 53,631,471 | 53,707,009 | 75,538 +  | 2 |
| GenelD:246179   | Fktn          | 4 | 53,714,182 | 53,763,271 | 49,089 +  | 1 |
| GenelD:52076    | Tmem38b       | 4 | 53,826,045 | 53,862,018 | 35,973 +  | 1 |
| GenelD:666920   | Gm8364        | 4 | 54,944,474 | 54,945,859 | 1,385 -   | 1 |
| GenelD:242466   | Zfp462        | 4 | 54,947,945 | 55,083,563 | 135,618 + | 1 |
| GenelD:19359    | Rad23b        | 4 | 55,350,042 | 55,392,237 | 42,195 +  | 1 |
| GenelD:16600    | Klf4          | 4 | 55,527,137 | 55,532,475 | 5,338 -   | 1 |
| GenelD:230233   | lkbkap        | 4 | 56,749,680 | 56,802,331 | 52,651 -  | 1 |
| GenelD:230234   | BC026590      | 4 | 56,802,329 | 56,809,605 | 7,276 +   | 1 |
| GenelD:54366    | Ctnnal1       | 4 | 56,810,935 | 56,865,211 | 54,276 -  | 2 |
| GenelD:242474   | Tmem245       | 4 | 56,876,013 | 56,947,429 | 71,416 -  | 1 |
| GenelD:545622   | Ptpn3         | 4 | 57,190,841 | 57,301,837 | 110,996 - | 2 |
| GenelD:619973   | Gm12538       | 4 | 57,413,711 | 57,426,153 | 12,442 -  | 1 |
| GenelD:14745    | Lpar1         | 4 | 58,435,252 | 58,553,491 | 118,239 - | 1 |
| GenelD:230249   | AI314180      | 4 | 58,800,030 | 58,912,725 | 112,695 - | 1 |
| GenelD:72429    | Dnajc25       | 4 | 59,003,193 | 59,023,398 | 20,205 +  | 1 |
| GenelD:230257   | Ptbp3         | 4 | 59,471,868 | 59,549,364 | 77,496 -  | 1 |

|                 |               |   |            |            |           |   |
|-----------------|---------------|---|------------|------------|-----------|---|
| GenelD:72479    | Hsd12         | 4 | 59,581,563 | 59,618,694 | 37,131 +  | 1 |
| GenelD:230259   | E130308A19Rik | 4 | 59,626,221 | 59,754,303 | 128,082 + | 1 |
| GenelD:209131   | Snx30         | 4 | 59,805,650 | 59,904,740 | 99,090 +  | 1 |
| GenelD:17025    | Alad          | 4 | 62,509,170 | 62,520,063 | 10,893 -  | 1 |
| GenelD:59001    | Pole3         | 4 | 62,523,798 | 62,525,014 | 1,216 -   | 1 |
| GenelD:214106   | 4933430I17Rik | 4 | 62,525,369 | 62,547,993 | 22,624 +  | 1 |
| GenelD:50780    | Rgs3          | 4 | 62,559,847 | 62,703,019 | 143,172 + | 1 |
| GenelD:373864   | Col27a1       | 4 | 63,215,412 | 63,334,991 | 119,579 + | 2 |
| GenelD:73750    | Whrn          | 4 | 63,414,910 | 63,495,951 | 81,041 -  | 1 |
| GenelD:66290    | Atp6v1g1      | 4 | 63,544,765 | 63,550,701 | 5,936 +   | 1 |
| GenelD:18491    | Pappa         | 4 | 65,124,174 | 65,357,509 | 233,335 + | 1 |
| GenelD:230316   | Megf9         | 4 | 70,431,927 | 70,534,928 | 103,001 - | 1 |
| GenelD:21885    | Tle1          | 4 | 72,117,142 | 72,200,919 | 83,777 -  | 1 |
| GenelD:68285    | C630043F03Rik | 4 | 72,201,244 | 72,203,930 | 2,686 +   | 1 |
| GenelD:76804    | Kdm4c         | 4 | 74,242,497 | 74,405,864 | 163,367 + | 1 |
| GenelD:19266    | Ptprd         | 4 | 75,941,239 | 76,594,299 | 653,060 - | 1 |
| GenelD:52829    | Lurap1l       | 4 | 80,910,686 | 80,954,301 | 43,615 +  | 1 |
| GenelD:18028    | Nfib          | 4 | 82,290,173 | 82,505,308 | 215,135 - | 1 |
| GenelD:77634    | Snapc3        | 4 | 83,417,744 | 83,453,340 | 35,596 +  | 1 |
| GenelD:101739   | Psip1         | 4 | 83,455,680 | 83,486,390 | 30,710 -  | 1 |
| GenelD:320226   | Ccdc171       | 4 | 83,525,545 | 83,864,670 | 339,125 + | 1 |
| GenelD:242509   | Bnc2          | 4 | 84,272,542 | 84,675,086 | 402,544 - | 2 |
| GenelD:338349   | Cntln         | 4 | 84,884,327 | 85,131,918 | 247,591 + | 1 |
| GenelD:68441    | Rraga         | 4 | 86,575,673 | 86,577,285 | 1,612 +   | 1 |
| GenelD:230376   | Haus6         | 4 | 86,581,284 | 86,612,022 | 30,738 -  | 2 |
| GenelD:329877   | Dennd4c       | 4 | 86,748,555 | 86,850,603 | 102,048 + | 2 |
| GenelD:20104    | Rps6          | 4 | 86,854,099 | 86,857,367 | 3,268 -   | 1 |
| GenelD:230379   | Acer2         | 4 | 86,874,414 | 86,920,881 | 46,467 +  | 1 |
| GenelD:76376    | Slc24a2       | 4 | 86,983,124 | 87,230,540 | 247,416 - | 1 |
| GenelD:70122    | Mllt3         | 4 | 87,769,925 | 88,033,407 | 263,482 - | 1 |
| GenelD:242521   | Klhl9         | 4 | 88,718,292 | 88,722,508 | 4,216 -   | 1 |
| GenelD:66902    | Mtap          | 4 | 89,137,370 | 89,181,090 | 43,720 +  | 1 |
| GenelD:12578    | Cdkn2a        | 4 | 89,274,473 | 89,294,619 | 20,146 -  | 1 |
| GenelD:15569    | Elavl2        | 4 | 91,250,766 | 91,399,984 | 149,218 - | 1 |
| GenelD:69136    | Tusc1         | 4 | 93,334,148 | 93,335,511 | 1,363 -   | 1 |
| GenelD:67770    | Caap1         | 4 | 94,500,079 | 94,556,796 | 56,717 -  | 1 |
| GenelD:18786    | Plaa          | 4 | 94,565,139 | 94,603,247 | 38,108 -  | 2 |
| GenelD:667250   | Gm12657       | 4 | 94,593,650 | 94,600,319 | 6,669 +   | 1 |
| GenelD:320713   | Mysm1         | 4 | 94,942,041 | 94,979,100 | 37,059 -  | 1 |
| GenelD:10003926 | Gm12703       | 4 | 95,029,963 | 95,048,370 | 18,407 -  | 1 |
| GenelD:16476    | Jun           | 4 | 95,049,036 | 95,052,222 | 3,186 -   | 1 |
| GenelD:18027    | Nfia          | 4 | 97,581,943 | 98,118,876 | 536,933 + | 1 |
| GenelD:12695    | Inadl         | 4 | 98,395,826 | 98,719,603 | 323,777 + | 1 |
| GenelD:230484   | Usp1          | 4 | 98,923,810 | 98,935,533 | 11,723 +  | 1 |
| GenelD:242557   | Atg4c         | 4 | 99,193,934 | 99,259,787 | 65,853 +  | 1 |
| GenelD:67733    | Itgb3bp       | 4 | 99,765,402 | 99,829,118 | 63,716 -  | 1 |
| GenelD:230500   | Efcab7        | 4 | 99,829,500 | 99,912,785 | 83,285 +  | 1 |

|                 |               |   |             |             |           |   |
|-----------------|---------------|---|-------------|-------------|-----------|---|
| GenelD:26563    | Ror1          | 4 | 100,095,791 | 100,442,545 | 346,754 + | 1 |
| GenelD:320508   | Cachd1        | 4 | 100,776,679 | 101,003,749 | 227,070 + | 1 |
| GenelD:242570   | Raver2        | 4 | 101,069,038 | 101,152,370 | 83,332 +  | 1 |
| GenelD:16451    | Jak1          | 4 | 101,151,974 | 101,265,282 | 113,308 - | 1 |
| GenelD:77866    | E130102H24Rik | 4 | 101,346,524 | 101,356,248 | 9,724 -   | 1 |
| GenelD:387143   | Mir101a       | 4 | 101,346,945 | 101,347,027 | 82 -      | 1 |
| GenelD:68400    | O610043K17Rik | 4 | 101,353,783 | 101,399,185 | 45,402 +  | 1 |
| GenelD:72685    | Dnajc6        | 4 | 101,496,648 | 101,642,799 | 146,151 + | 1 |
| GenelD:230514   | Leprot        | 4 | 101,647,783 | 101,659,358 | 11,575 +  | 1 |
| GenelD:242584   | Wdr78         | 4 | 103,038,065 | 103,114,299 | 76,234 -  | 2 |
| GenelD:71148    | Mier1         | 4 | 103,114,465 | 103,165,749 | 51,284 +  | 2 |
| GenelD:242585   | Slc35d1       | 4 | 103,171,718 | 103,214,884 | 43,166 -  | 1 |
| GenelD:67916    | Ppap2b        | 4 | 105,157,347 | 105,232,767 | 75,420 +  | 1 |
| GenelD:329908   | Usp24         | 4 | 106,316,213 | 106,441,327 | 125,114 + | 1 |
| GenelD:74754    | Dhcr24        | 4 | 106,561,038 | 106,589,113 | 28,075 +  | 1 |
| GenelD:72475    | Ssbp3         | 4 | 106,911,470 | 107,049,694 | 138,224 + | 2 |
| GenelD:66526    | Tceanc2       | 4 | 107,134,162 | 107,178,366 | 44,204 -  | 1 |
| GenelD:56374    | Tmem59        | 4 | 107,178,630 | 107,200,996 | 22,366 +  | 1 |
| GenelD:230584   | Yipf1         | 4 | 107,314,363 | 107,359,823 | 45,460 +  | 1 |
| GenelD:72787    | Tmem48        | 4 | 107,367,784 | 107,414,338 | 46,554 +  | 1 |
| GenelD:230587   | Glis1         | 4 | 107,434,719 | 107,635,059 | 200,340 + | 1 |
| GenelD:16975    | Lrp8          | 4 | 107,802,259 | 107,876,840 | 74,581 +  | 1 |
| GenelD:619295   | B230314M03Rik | 4 | 107,806,033 | 107,823,022 | 16,989 -  | 1 |
| GenelD:230590   | Zyg11a        | 4 | 108,181,934 | 108,217,922 | 35,988 -  | 1 |
| GenelD:414872   | Zyg11b        | 4 | 108,227,755 | 108,301,090 | 73,335 -  | 2 |
| GenelD:18392    | Orc1          | 4 | 108,579,454 | 108,614,833 | 35,379 +  | 1 |
| GenelD:319965   | Cc2d1b        | 4 | 108,619,956 | 108,634,122 | 14,166 +  | 1 |
| GenelD:73133    | 3110021N24Rik | 4 | 108,719,649 | 108,781,904 | 62,255 +  | 1 |
| GenelD:66073    | Txndc12       | 4 | 108,834,678 | 108,862,120 | 27,442 +  | 1 |
| GenelD:100087   | Kti12         | 4 | 108,847,857 | 108,849,412 | 1,555 +   | 1 |
| GenelD:100273   | Osbpl9        | 4 | 109,061,145 | 109,202,272 | 141,127 - | 1 |
| GenelD:13858    | Eps15         | 4 | 109,280,275 | 109,387,817 | 107,542 + | 1 |
| GenelD:319743   | 9630013D21Rik | 4 | 109,651,529 | 109,657,853 | 6,324 -   | 2 |
| GenelD:12580    | Cdkn2c        | 4 | 109,660,876 | 109,665,372 | 4,496 -   | 2 |
| GenelD:14084    | Faf1          | 4 | 109,676,627 | 109,963,960 | 287,333 + | 2 |
| GenelD:15572    | Elavl4        | 4 | 110,203,737 | 110,351,911 | 148,174 - | 1 |
| GenelD:67946    | Spata6        | 4 | 111,720,010 | 111,829,137 | 109,127 + | 1 |
| GenelD:666048   | Trabd2b       | 4 | 114,406,724 | 114,615,098 | 208,374 + | 1 |
| GenelD:17301    | Foxd2         | 4 | 114,906,280 | 114,908,898 | 2,618 -   | 1 |
| GenelD:10004073 | 9130206I24Rik | 4 | 114,909,289 | 114,921,118 | 11,829 +  | 2 |
| GenelD:30923    | Foxe3         | 4 | 114,925,147 | 114,926,013 | 866 -     | 1 |
| GenelD:66588    | Cmpk1         | 4 | 114,960,613 | 114,987,228 | 26,615 -  | 1 |
| GenelD:20460    | Stil          | 4 | 115,000,118 | 115,043,203 | 43,085 +  | 1 |
| GenelD:21349    | Tal1          | 4 | 115,059,527 | 115,071,755 | 12,228 +  | 1 |
| GenelD:230648   | Efcab14       | 4 | 115,738,073 | 115,777,327 | 39,254 +  | 1 |
| GenelD:14073    | Faah          | 4 | 115,996,656 | 116,017,902 | 21,246 -  | 1 |
| GenelD:66576    | Uqcrh         | 4 | 116,066,965 | 116,075,070 | 8,105 -   | 1 |

|                 |               |   |             |             |           |   |
|-----------------|---------------|---|-------------|-------------|-----------|---|
| GenelD:230654   | Lrrc41        | 4 | 116,075,465 | 116,097,043 | 21,578 +  | 1 |
| GenelD:68075    | Lurap1        | 4 | 116,136,728 | 116,144,616 | 7,888 -   | 1 |
| GenelD:68273    | Pomgnt1       | 4 | 116,150,518 | 116,159,844 | 9,326 +   | 1 |
| GenelD:230657   | Tmem69        | 4 | 116,551,528 | 116,555,943 | 4,415 -   | 1 |
| GenelD:77110    | Gpbp1l1       | 4 | 116,557,727 | 116,593,882 | 36,155 +  | 1 |
| GenelD:50927    | Nasp          | 4 | 116,601,052 | 116,627,951 | 26,899 -  | 1 |
| GenelD:58810    | Akr1a1        | 4 | 116,636,510 | 116,651,674 | 15,164 -  | 1 |
| GenelD:10050295 | AV051173      | 4 | 116,684,962 | 116,686,022 | 1,060 -   | 1 |
| GenelD:18477    | Prdx1         | 4 | 116,685,599 | 116,700,000 | 14,401 +  | 1 |
| GenelD:74464    | Zswim5        | 4 | 116,877,402 | 116,989,105 | 111,703 + | 1 |
| GenelD:22275    | Urod          | 4 | 116,990,217 | 116,994,375 | 4,158 -   | 1 |
| GenelD:76608    | Hectd3        | 4 | 116,995,348 | 117,005,277 | 9,929 +   | 1 |
| GenelD:108067   | Eif2b3        | 4 | 117,019,408 | 117,086,852 | 67,444 +  | 2 |
| GenelD:19207    | Ptch2         | 4 | 117,096,356 | 117,114,831 | 18,475 +  | 1 |
| GenelD:78611    | Btbd19        | 4 | 117,119,218 | 117,125,725 | 6,507 -   | 1 |
| GenelD:242646   | Tctex1d4      | 4 | 117,126,813 | 117,128,730 | 1,917 +   | 1 |
| GenelD:12795    | Plk3          | 4 | 117,128,655 | 117,133,952 | 5,297 -   | 1 |
| GenelD:625405   | Gm13015       | 4 | 117,148,902 | 117,149,303 | 401 +     | 1 |
| GenelD:20116    | Rps8          | 4 | 117,153,836 | 117,156,132 | 2,296 -   | 1 |
| GenelD:10021742 | Snord38a      | 4 | 117,154,516 | 117,154,574 | 58 -      | 1 |
| GenelD:10021653 | Snord55       | 4 | 117,155,771 | 117,155,848 | 77 -      | 1 |
| GenelD:73804    | Kif2c         | 4 | 117,159,634 | 117,182,624 | 22,990 -  | 2 |
| GenelD:66743    | Rnf220        | 4 | 117,271,464 | 117,496,915 | 225,451 - | 1 |
| GenelD:140546   | Eri3          | 4 | 117,550,494 | 117,674,281 | 123,787 + | 1 |
| GenelD:14664    | Slc6a9        | 4 | 117,835,258 | 117,869,305 | 34,047 +  | 1 |
| GenelD:53418    | B4galt2       | 4 | 117,873,000 | 117,883,476 | 10,476 -  | 1 |
| GenelD:114143   | Atp6v0b       | 4 | 117,884,330 | 117,887,329 | 2,999 -   | 1 |
| GenelD:67728    | Dph2          | 4 | 117,888,643 | 117,892,003 | 3,360 -   | 1 |
| GenelD:230673   | Ipo13         | 4 | 117,894,493 | 117,914,999 | 20,506 -  | 1 |
| GenelD:20441    | St3gal3       | 4 | 117,932,153 | 118,134,914 | 202,761 - | 1 |
| GenelD:230674   | Kdm4a         | 4 | 118,137,004 | 118,180,043 | 43,039 -  | 1 |
| GenelD:19268    | Ptprf         | 4 | 118,208,213 | 118,291,397 | 83,184 -  | 1 |
| GenelD:230676   | Szt2          | 4 | 118,362,740 | 118,409,263 | 46,523 -  | 1 |
| GenelD:80509    | Med8          | 4 | 118,409,337 | 118,415,782 | 6,445 +   | 1 |
| GenelD:54325    | Elovl1        | 4 | 118,428,093 | 118,432,916 | 4,823 +   | 1 |
| GenelD:107995   | Cdc20         | 4 | 118,432,901 | 118,437,343 | 4,442 -   | 1 |
| GenelD:17480    | Mpl           | 4 | 118,442,417 | 118,457,495 | 15,078 -  | 1 |
| GenelD:20525    | Slc2a1        | 4 | 119,108,745 | 119,137,330 | 28,585 +  | 1 |
| GenelD:27028    | Ermap         | 4 | 119,175,457 | 119,190,011 | 14,554 -  | 1 |
| GenelD:69216    | Ccdc23        | 4 | 119,195,310 | 119,201,298 | 5,988 +   | 1 |
| GenelD:75180    | 4930538K18Rik | 4 | 119,205,055 | 119,218,217 | 13,162 -  | 1 |
| GenelD:230696   | AU022252      | 4 | 119,225,138 | 119,232,724 | 7,586 -   | 1 |
| GenelD:56401    | Lepre1        | 4 | 119,232,915 | 119,248,977 | 16,062 +  | 2 |
| GenelD:242653   | Cldn19        | 4 | 119,255,441 | 119,262,438 | 6,997 +   | 1 |
| GenelD:22608    | Ybx1          | 4 | 119,277,327 | 119,294,513 | 17,186 -  | 2 |
| GenelD:66101    | Ppih          | 4 | 119,300,010 | 119,320,523 | 20,513 -  | 3 |
| GenelD:73332    | Ccdc30        | 4 | 119,322,893 | 119,415,521 | 92,628 -  | 3 |

|                 |               |   |             |             |           |   |
|-----------------|---------------|---|-------------|-------------|-----------|---|
| GenelD:106564   | Ppcs          | 4 | 119,418,533 | 119,422,420 | 3,887 -   | 2 |
| GenelD:332934   | Zmynd12       | 4 | 119,422,684 | 119,453,899 | 31,215 +  | 2 |
| GenelD:433752   | AA415398      | 4 | 119,530,308 | 119,538,769 | 8,461 -   | 2 |
| GenelD:230700   | Foxj3         | 4 | 119,539,688 | 119,629,119 | 89,431 +  | 2 |
| GenelD:10105564 | LOC101055647  | 4 | 119,712,286 | 119,736,766 | 24,480 +  | 1 |
| GenelD:329934   | Foxo6         | 4 | 120,267,078 | 120,287,261 | 20,183 -  | 1 |
| GenelD:29871    | Scmh1         | 4 | 120,405,281 | 120,530,199 | 124,918 + | 1 |
| GenelD:51797    | Ctps          | 4 | 120,539,868 | 120,570,276 | 30,408 -  | 1 |
| GenelD:56222    | Cited4        | 4 | 120,666,563 | 120,667,820 | 1,257 +   | 1 |
| GenelD:18046    | Nfyc          | 4 | 120,757,435 | 120,831,575 | 74,140 -  | 1 |
| GenelD:73172    | Exo5          | 4 | 120,921,202 | 120,925,005 | 3,803 -   | 1 |
| GenelD:381549   | Zfp69         | 4 | 120,930,137 | 120,951,701 | 21,564 -  | 1 |
| GenelD:69780    | Smap2         | 4 | 120,968,317 | 121,017,247 | 48,930 -  | 1 |
| GenelD:16918    | Mycl1         | 4 | 122,996,099 | 123,002,485 | 6,386 +   | 1 |
| GenelD:66966    | Trit1         | 4 | 123,016,597 | 123,054,934 | 38,337 +  | 1 |
| GenelD:11426    | Macf1         | 4 | 123,349,633 | 123,684,360 | 334,727 - | 3 |
| GenelD:442834   | D830031N03Rik | 4 | 123,403,601 | 123,411,911 | 8,310 -   | 1 |
| GenelD:68050    | Akirin1       | 4 | 123,735,195 | 123,750,299 | 15,104 -  | 1 |
| GenelD:10003864 | Gm10572       | 4 | 123,895,291 | 123,896,618 | 1,327 -   | 1 |
| GenelD:56309    | Mycbp         | 4 | 123,905,013 | 123,912,250 | 7,237 +   | 2 |
| GenelD:54170    | Rragc         | 4 | 123,917,433 | 123,936,997 | 19,564 +  | 1 |
| GenelD:18991    | Pou3f1        | 4 | 124,657,646 | 124,660,655 | 3,009 +   | 1 |
| GenelD:67205    | Utp11l        | 4 | 124,678,764 | 124,693,554 | 14,790 -  | 1 |
| GenelD:14201    | Fhl3          | 4 | 124,700,699 | 124,708,611 | 7,912 +   | 2 |
| GenelD:75062    | Sf3a3         | 4 | 124,714,861 | 124,732,423 | 17,562 +  | 1 |
| GenelD:16330    | Inpp5b        | 4 | 124,741,878 | 124,801,511 | 59,633 +  | 1 |
| GenelD:17764    | Mtf1          | 4 | 124,802,549 | 124,849,800 | 47,251 +  | 2 |
| GenelD:68920    | 1110065P20Rik | 4 | 124,849,485 | 124,850,730 | 1,245 -   | 1 |
| GenelD:230734   | Yrdc          | 4 | 124,850,759 | 124,855,242 | 4,483 +   | 1 |
| GenelD:215090   | Maneal        | 4 | 124,855,239 | 124,862,171 | 6,932 -   | 1 |
| GenelD:52276    | Cdca8         | 4 | 124,918,465 | 124,936,917 | 18,452 -  | 1 |
| GenelD:194268   | 9930104L06Rik | 4 | 124,937,048 | 124,944,661 | 7,613 +   | 1 |
| GenelD:75563    | Dnali1        | 4 | 125,055,339 | 125,065,657 | 10,318 -  | 1 |
| GenelD:76793    | Snip1         | 4 | 125,066,693 | 125,074,043 | 7,350 +   | 1 |
| GenelD:12986    | Csf3r         | 4 | 126,024,659 | 126,044,975 | 20,316 +  | 1 |
| GenelD:66407    | Mrps15        | 4 | 126,046,928 | 126,055,536 | 8,608 +   | 1 |
| GenelD:230751   | Oscp1         | 4 | 126,058,565 | 126,089,334 | 30,769 +  | 1 |
| GenelD:116748   | Lsm10         | 4 | 126,096,653 | 126,098,584 | 1,931 +   | 2 |
| GenelD:74178    | Stk40         | 4 | 126,103,957 | 126,141,029 | 37,072 +  | 4 |
| GenelD:230752   | Eva1b         | 4 | 126,148,003 | 126,149,874 | 1,871 +   | 2 |
| GenelD:66938    | Sh3d21        | 4 | 126,150,602 | 126,163,341 | 12,739 -  | 1 |
| GenelD:230753   | Thrap3        | 4 | 126,164,082 | 126,202,710 | 38,628 -  | 1 |
| GenelD:245877   | Map7d1        | 4 | 126,232,167 | 126,256,319 | 24,152 -  | 1 |
| GenelD:27096    | Trappc3       | 4 | 126,262,405 | 126,275,883 | 13,478 +  | 1 |
| GenelD:329941   | Col8a2        | 4 | 126,286,794 | 126,314,330 | 27,536 +  | 1 |
| GenelD:100206   | Adprhl2       | 4 | 126,316,351 | 126,321,703 | 5,352 -   | 1 |
| GenelD:24084    | Tekt2         | 4 | 126,322,121 | 126,325,199 | 3,078 -   | 1 |

|                 |               |   |             |             |           |   |
|-----------------|---------------|---|-------------|-------------|-----------|---|
| GenelD:10004892 | Gm12945       | 4 | 126,323,599 | 126,325,237 | 1,638 +   | 1 |
| GenelD:214150   | Ago3          | 4 | 126,340,678 | 126,429,542 | 88,864 -  | 1 |
| GenelD:236511   | Ago1          | 4 | 126,435,012 | 126,468,421 | 33,409 -  | 2 |
| GenelD:230757   | 5730409E04Rik | 4 | 126,609,854 | 126,614,371 | 4,517 +   | 1 |
| GenelD:332937   | Tfap2e        | 4 | 126,716,003 | 126,736,269 | 20,266 -  | 1 |
| GenelD:26562    | Ncdn          | 4 | 126,743,750 | 126,753,429 | 9,679 -   | 2 |
| GenelD:100317   | AU040320      | 4 | 126,753,555 | 126,869,694 | 116,139 + | 1 |
| GenelD:71514    | Sfpq          | 4 | 127,021,301 | 127,037,014 | 15,713 +  | 1 |
| GenelD:242667   | Dlgap3        | 4 | 127,169,271 | 127,237,022 | 67,751 +  | 4 |
| GenelD:80284    | Smim12        | 4 | 127,243,784 | 127,247,809 | 4,025 +   | 2 |
| GenelD:54383    | Phc2          | 4 | 128,654,702 | 128,752,881 | 98,179 +  | 1 |
| GenelD:67525    | Trim62        | 4 | 128,884,140 | 128,911,326 | 27,186 +  | 1 |
| GenelD:242669   | Adc           | 4 | 128,932,146 | 128,962,417 | 30,271 -  | 1 |
| GenelD:67349    | 1700086P04Rik | 4 | 129,050,088 | 129,057,983 | 7,895 -   | 1 |
| GenelD:75234    | Rnf19b        | 4 | 129,058,271 | 129,084,526 | 26,255 +  | 1 |
| GenelD:74648    | S100pbb       | 4 | 129,150,825 | 129,189,482 | 38,657 -  | 1 |
| GenelD:107271   | Yars          | 4 | 129,189,795 | 129,219,607 | 29,812 +  | 1 |
| GenelD:19646    | Rbbp4         | 4 | 129,307,100 | 129,335,370 | 28,270 -  | 1 |
| GenelD:67106    | Zbtb8os       | 4 | 129,336,026 | 129,347,029 | 11,003 +  | 1 |
| GenelD:17357    | Marcksl1      | 4 | 129,513,581 | 129,515,981 | 2,400 +   | 1 |
| GenelD:433759   | Hdac1         | 4 | 129,516,104 | 129,542,646 | 26,542 -  | 1 |
| GenelD:54709    | Eif3i         | 4 | 129,591,974 | 129,600,648 | 8,674 -   | 1 |
| GenelD:76799    | Tmem234       | 4 | 129,600,707 | 129,607,890 | 7,183 +   | 1 |
| GenelD:10050449 | Dcdc2b        | 4 | 129,608,331 | 129,614,257 | 5,926 -   | 1 |
| GenelD:16650    | Kpna6         | 4 | 129,643,979 | 129,672,767 | 28,788 -  | 1 |
| GenelD:230770   | Tmem39b       | 4 | 129,676,355 | 129,696,838 | 20,483 -  | 1 |
| GenelD:20218    | Khdrbs1       | 4 | 129,703,169 | 129,742,303 | 39,134 -  | 1 |
| GenelD:19244    | Ptp4a2        | 4 | 129,820,479 | 129,850,003 | 29,524 +  | 1 |
| GenelD:622480   | Spocd1        | 4 | 129,920,709 | 129,956,993 | 36,284 +  | 1 |
| GenelD:72225    | 1700003M07Rik | 4 | 129,960,374 | 129,965,138 | 4,764 +   | 1 |
| GenelD:230775   | Bai2          | 4 | 129,985,078 | 130,022,633 | 37,555 +  | 1 |
| GenelD:107581   | Col16a1       | 4 | 130,047,840 | 130,099,277 | 51,437 +  | 1 |
| GenelD:80912    | Pum1          | 4 | 130,663,359 | 130,781,564 | 118,205 + | 1 |
| GenelD:19273    | Ptpru         | 4 | 131,768,457 | 131,838,278 | 69,821 -  | 1 |
| GenelD:26922    | Mecr          | 4 | 131,843,471 | 131,867,787 | 24,316 +  | 1 |
| GenelD:545681   | Gm12992       | 4 | 131,912,416 | 131,915,516 | 3,100 -   | 2 |
| GenelD:623230   | Tmem200b      | 4 | 131,921,771 | 131,923,140 | 1,369 +   | 2 |
| GenelD:269587   | Epb4.1        | 4 | 131,923,413 | 132,075,313 | 151,900 - | 4 |
| GenelD:10105601 | LOC101056016  | 4 | 132,073,075 | 132,076,992 | 3,917 +   | 1 |
| GenelD:213541   | Ythdf2        | 4 | 132,184,916 | 132,212,256 | 27,340 -  | 1 |
| GenelD:664903   | Rps15a-ps4    | 4 | 132,219,893 | 132,220,589 | 696 -     | 1 |
| GenelD:56809    | Gmeb1         | 4 | 132,221,025 | 132,261,549 | 40,524 -  | 1 |
| GenelD:100088   | Rcc1          | 4 | 132,331,919 | 132,345,750 | 13,831 -  | 2 |
| GenelD:399101   | Snhg3         | 4 | 132,351,933 | 132,353,686 | 1,753 -   | 1 |
| GenelD:10030694 | Snora73b      | 4 | 132,352,322 | 132,352,526 | 204 -     | 1 |
| GenelD:10030694 | Snora73a      | 4 | 132,352,775 | 132,352,979 | 204 -     | 1 |
| GenelD:100169   | Phactr4       | 4 | 132,355,923 | 132,422,446 | 66,523 -  | 2 |



|               |               |   |             |             |           |   |
|---------------|---------------|---|-------------|-------------|-----------|---|
| GenelD:67219  | Med18         | 4 | 132,458,729 | 132,463,921 | 5,192 -   | 1 |
| GenelD:230784 | Sesn2         | 4 | 132,492,804 | 132,510,456 | 17,652 -  | 1 |
| GenelD:11983  | Atpif1        | 4 | 132,530,555 | 132,533,659 | 3,104 -   | 2 |
| GenelD:68598  | Dnajc8        | 4 | 132,535,559 | 132,553,742 | 18,183 +  | 2 |
| GenelD:14050  | Eya3          | 4 | 132,639,046 | 132,724,763 | 85,717 +  | 1 |
| GenelD:381560 | Xkr8          | 4 | 132,724,904 | 132,732,546 | 7,642 -   | 1 |
| GenelD:100340 | Smpdl3b       | 4 | 132,732,966 | 132,757,171 | 24,205 -  | 1 |
| GenelD:19891  | Rpa2          | 4 | 132,768,360 | 132,778,746 | 10,386 +  | 1 |
| GenelD:230789 | Fam76a        | 4 | 132,899,213 | 132,922,551 | 23,338 -  | 1 |
| GenelD:14191  | Fgr           | 4 | 132,974,095 | 133,001,893 | 27,798 +  | 1 |
| GenelD:230793 | Ahdc1         | 4 | 133,011,506 | 133,078,110 | 66,604 +  | 4 |
| GenelD:242687 | Wasf2         | 4 | 133,130,633 | 133,198,330 | 67,697 +  | 1 |
| GenelD:53608  | Map3k6        | 4 | 133,240,818 | 133,252,928 | 12,110 +  | 2 |
| GenelD:269589 | Syt1          | 4 | 133,253,090 | 133,263,087 | 9,997 -   | 1 |
| GenelD:52174  | Tmem222       | 4 | 133,266,045 | 133,277,790 | 11,745 -  | 1 |
| GenelD:18221  | Nudc          | 4 | 133,532,542 | 133,546,027 | 13,485 -  | 1 |
| GenelD:23957  | Nr0b2         | 4 | 133,553,390 | 133,556,536 | 3,146 +   | 1 |
| GenelD:242691 | Gpatch3       | 4 | 133,574,745 | 133,584,242 | 9,497 +   | 2 |
| GenelD:100210 | Gpn2          | 4 | 133,584,373 | 133,591,735 | 7,362 +   | 2 |
| GenelD:230801 | Pigv          | 4 | 133,661,425 | 133,672,647 | 11,222 -  | 1 |
| GenelD:93760  | Arid1a        | 4 | 133,679,008 | 133,753,611 | 74,603 -  | 3 |
| GenelD:15331  | Hmgn2         | 4 | 133,964,739 | 133,967,991 | 3,252 -   | 1 |
| GenelD:67422  | Dhdds         | 4 | 133,969,057 | 134,000,864 | 31,807 -  | 1 |
| GenelD:194231 | Cnksr1        | 4 | 134,228,042 | 134,238,399 | 10,357 -  | 1 |
| GenelD:68040  | Zfp593        | 4 | 134,243,306 | 134,245,591 | 2,285 -   | 2 |
| GenelD:77490  | E130218I03Rik | 4 | 134,243,763 | 134,245,873 | 2,110 +   | 2 |
| GenelD:72690  | Grrp1         | 4 | 134,251,110 | 134,254,106 | 2,996 -   | 2 |
| GenelD:230809 | Pdik1l        | 4 | 134,275,002 | 134,287,846 | 12,844 -  | 1 |
| GenelD:16765  | Stmn1         | 4 | 134,468,320 | 134,473,843 | 5,523 +   | 1 |
| GenelD:76824  | Mtfr1l        | 4 | 134,525,555 | 134,535,387 | 9,832 -   | 1 |
| GenelD:74777  | Sepn1         | 4 | 134,537,892 | 134,552,166 | 14,274 -  | 1 |
| GenelD:230815 | Man1c1        | 4 | 134,561,690 | 134,704,290 | 142,600 - | 1 |
| GenelD:100017 | Ldlrap1       | 4 | 134,745,412 | 134,768,004 | 22,592 -  | 1 |
| GenelD:66146  | Tmem57        | 4 | 134,802,759 | 134,853,345 | 50,586 -  | 1 |
| GenelD:71817  | Tmem50a       | 4 | 134,897,849 | 134,914,916 | 17,067 -  | 2 |
| GenelD:27981  | D4Wsu53e      | 4 | 134,923,625 | 134,927,370 | 3,745 +   | 3 |
| GenelD:68592  | Syf2          | 4 | 134,930,980 | 134,937,537 | 6,557 +   | 2 |
| GenelD:29876  | Clic4         | 4 | 135,213,969 | 135,272,760 | 58,791 -  | 1 |
| GenelD:51796  | Srrm1         | 4 | 135,320,484 | 135,353,214 | 32,730 -  | 1 |
| GenelD:14105  | Srsf10        | 4 | 135,856,092 | 135,869,908 | 13,816 +  | 1 |
| GenelD:12802  | Cnr2          | 4 | 135,895,404 | 135,920,215 | 24,811 +  | 1 |
| GenelD:71665  | Fuca1         | 4 | 135,920,726 | 135,940,300 | 19,574 +  | 2 |
| GenelD:15356  | Hmgcl         | 4 | 135,946,453 | 135,962,617 | 16,164 +  | 3 |
| GenelD:74246  | Gale          | 4 | 135,965,165 | 135,968,178 | 3,013 +   | 2 |
| GenelD:26394  | Lypla2        | 4 | 135,968,225 | 135,972,594 | 4,369 -   | 2 |
| GenelD:66193  | Pithd1        | 4 | 135,975,602 | 135,987,244 | 11,642 -  | 1 |
| GenelD:27224  | Tceb3         | 4 | 136,003,370 | 136,021,649 | 18,279 -  | 1 |

|                 |               |   |             |             |           |   |
|-----------------|---------------|---|-------------|-------------|-----------|---|
| GenelD:67025    | Rpl11         | 4 | 136,049,948 | 136,053,371 | 3,423 -   | 1 |
| GenelD:15903    | Id3           | 4 | 136,143,822 | 136,145,392 | 1,570 +   | 1 |
| GenelD:242705   | E2f2          | 4 | 136,172,394 | 136,196,057 | 23,663 +  | 1 |
| GenelD:22704    | Zfp46         | 4 | 136,286,069 | 136,293,942 | 7,873 +   | 1 |
| GenelD:74326    | Hnrnpr        | 4 | 136,310,976 | 136,340,678 | 29,702 +  | 1 |
| GenelD:269593   | Luzp1         | 4 | 136,469,761 | 136,549,318 | 79,557 +  | 2 |
| GenelD:242707   | Lactbl1       | 4 | 136,622,621 | 136,638,110 | 15,489 +  | 1 |
| GenelD:13844    | Ephb2         | 4 | 136,653,608 | 136,835,935 | 182,327 - | 1 |
| GenelD:230848   | Zbtb40        | 4 | 136,979,732 | 137,048,695 | 68,963 -  | 1 |
| GenelD:22417    | Wnt4          | 4 | 137,277,635 | 137,299,501 | 21,866 +  | 1 |
| GenelD:12540    | Cdc42         | 4 | 137,319,696 | 137,357,759 | 38,063 -  | 1 |
| GenelD:665533   | Rpl31-ps10    | 4 | 137,395,299 | 137,395,709 | 410 +     | 1 |
| GenelD:15530    | Hspg2         | 4 | 137,468,803 | 137,570,630 | 101,827 + | 2 |
| GenelD:170707   | Usp48         | 4 | 137,594,189 | 137,658,537 | 64,348 +  | 1 |
| GenelD:110351   | Rap1gap       | 4 | 137,664,726 | 137,729,861 | 65,135 +  | 2 |
| GenelD:11647    | Alpl          | 4 | 137,741,732 | 137,796,377 | 54,645 -  | 1 |
| GenelD:230857   | Ece1          | 4 | 137,862,237 | 137,965,229 | 102,992 + | 2 |
| GenelD:230861   | Eif4g3        | 4 | 137,993,456 | 138,207,079 | 213,623 + | 2 |
| GenelD:15441    | Hp1bp3        | 4 | 138,216,627 | 138,243,170 | 26,543 +  | 1 |
| GenelD:68943    | Pink1         | 4 | 138,313,409 | 138,326,296 | 12,887 -  | 1 |
| GenelD:625638   | Fam43b        | 4 | 138,394,092 | 138,396,458 | 2,366 -   | 1 |
| GenelD:66259    | Camk2n1       | 4 | 138,455,148 | 138,460,126 | 4,978 +   | 1 |
| GenelD:73162    | Otud3         | 4 | 138,895,379 | 138,913,947 | 18,568 -  | 1 |
| GenelD:66825    | Rnf186        | 4 | 138,967,112 | 138,968,366 | 1,254 +   | 1 |
| GenelD:77056    | Tmco4         | 4 | 138,972,905 | 139,059,171 | 86,266 +  | 1 |
| GenelD:17965    | Nbl1          | 4 | 139,082,292 | 139,092,970 | 10,678 -  | 1 |
| GenelD:433771   | Minos1        | 4 | 139,101,814 | 139,131,113 | 29,299 -  | 2 |
| GenelD:12345    | Capzb         | 4 | 139,192,931 | 139,291,812 | 98,881 +  | 1 |
| GenelD:212555   | Pqlc2         | 4 | 139,298,005 | 139,310,700 | 12,695 -  | 1 |
| GenelD:110198   | Akr7a5        | 4 | 139,310,744 | 139,318,786 | 8,042 +   | 1 |
| GenelD:212632   | Iffo2         | 4 | 139,530,548 | 139,620,382 | 89,834 +  | 1 |
| GenelD:230872   | Crocc         | 4 | 141,016,637 | 141,060,545 | 43,908 -  | 2 |
| GenelD:66147    | Necap2        | 4 | 141,066,512 | 141,078,345 | 11,833 -  | 2 |
| GenelD:329972   | Spata21       | 4 | 141,088,345 | 141,112,759 | 24,414 +  | 1 |
| GenelD:213491   | Szrd1         | 4 | 141,113,015 | 141,139,796 | 26,781 -  | 2 |
| GenelD:213499   | Fbxo42        | 4 | 141,147,922 | 141,204,062 | 56,140 +  | 2 |
| GenelD:13836    | Epha2         | 4 | 141,301,221 | 141,329,384 | 28,163 +  | 2 |
| GenelD:277744   | Gm694         | 4 | 141,432,672 | 141,436,105 | 3,433 -   | 1 |
| GenelD:22642    | Zbtb17        | 4 | 141,444,673 | 141,467,937 | 23,264 +  | 1 |
| GenelD:56381    | Spen          | 4 | 141,467,890 | 141,538,597 | 70,707 -  | 3 |
| GenelD:10004295 | Gm4123        | 4 | 141,536,181 | 141,537,422 | 1,241 +   | 3 |
| GenelD:320456   | B330016D10Rik | 4 | 141,546,162 | 141,548,313 | 2,151 +   | 3 |
| GenelD:74202    | Fblim1        | 4 | 141,576,062 | 141,606,052 | 29,990 -  | 1 |
| GenelD:213989   | Tmem82        | 4 | 141,614,233 | 141,618,633 | 4,400 -   | 1 |
| GenelD:384071   | Slc25a34      | 4 | 141,618,824 | 141,623,834 | 5,010 -   | 1 |
| GenelD:69582    | Plekhn2       | 4 | 141,625,734 | 141,664,115 | 38,381 -  | 2 |
| GenelD:68817    | Ddi2          | 4 | 141,683,563 | 141,723,419 | 39,856 -  | 1 |

|                 |               |   |             |             |           |   |
|-----------------|---------------|---|-------------|-------------|-----------|---|
| GenelD:214063   | Dnajc16       | 4 | 141,761,998 | 141,790,644 | 28,646 -  | 1 |
| GenelD:12371    | Casp9         | 4 | 141,793,612 | 141,815,975 | 22,363 +  | 1 |
| GenelD:27984    | Efhd2         | 4 | 141,858,142 | 141,874,920 | 16,778 -  | 1 |
| GenelD:214359   | Tmem51        | 4 | 142,030,993 | 142,084,304 | 53,311 -  | 1 |
| GenelD:10003869 | Tmem51as1     | 4 | 142,084,298 | 142,088,101 | 3,803 +   | 1 |
| GenelD:71529    | Kazn          | 4 | 142,102,390 | 142,239,401 | 137,011 - | 1 |
| GenelD:110593   | Prdm2         | 4 | 143,107,391 | 143,212,709 | 105,318 - | 2 |
| GenelD:242735   | Lrrc38        | 4 | 143,349,750 | 143,371,028 | 21,278 +  | 1 |
| GenelD:20148    | Dhrs3         | 4 | 144,892,827 | 144,927,645 | 34,818 +  | 1 |
| GenelD:230895   | Vps13d        | 4 | 144,975,137 | 145,190,592 | 215,455 - | 1 |
| GenelD:666532   | Gm13139       | 4 | 147,132,093 | 147,180,579 | 48,486 +  | 1 |
| GenelD:18822    | Plod1         | 4 | 147,909,753 | 147,936,776 | 27,023 -  | 1 |
| GenelD:77034    | 2510039O18Rik | 4 | 147,940,895 | 147,947,314 | 6,419 +   | 1 |
| GenelD:11610    | Agtrap        | 4 | 148,077,061 | 148,088,064 | 11,003 -  | 1 |
| GenelD:70433    | Draxin        | 4 | 148,098,437 | 148,130,698 | 32,261 -  | 1 |
| GenelD:56717    | Mtor          | 4 | 148,448,582 | 148,557,685 | 109,103 + | 2 |
| GenelD:50912    | Exosc10       | 4 | 148,558,427 | 148,582,401 | 23,974 +  | 3 |
| GenelD:20810    | Srm           | 4 | 148,591,513 | 148,594,619 | 3,106 +   | 1 |
| GenelD:230908   | Tardbp        | 4 | 148,612,382 | 148,626,996 | 14,614 -  | 1 |
| GenelD:56273    | Pex14         | 4 | 148,960,535 | 149,099,812 | 139,277 - | 1 |
| GenelD:13347    | Dffa          | 4 | 149,104,153 | 149,120,650 | 16,497 +  | 1 |
| GenelD:69928    | Apitd1        | 4 | 149,128,349 | 149,137,600 | 9,251 -   | 1 |
| GenelD:110208   | Pgd           | 4 | 149,149,985 | 149,166,707 | 16,722 -  | 1 |
| GenelD:16561    | Kif1b         | 4 | 149,176,321 | 149,307,698 | 131,377 - | 2 |
| GenelD:63958    | Ube4b         | 4 | 149,328,416 | 149,426,631 | 98,215 -  | 1 |
| GenelD:66454    | Nmnat1        | 4 | 149,468,787 | 149,485,142 | 16,355 -  | 1 |
| GenelD:69151    | Lzic          | 4 | 149,485,333 | 149,496,668 | 11,335 +  | 1 |
| GenelD:70556    | Slc25a33      | 4 | 149,744,036 | 149,774,267 | 30,231 -  | 1 |
| GenelD:74646    | Spsb1         | 4 | 149,896,283 | 149,955,006 | 58,723 -  | 1 |
| GenelD:100198   | H6pd          | 4 | 149,979,481 | 150,009,023 | 29,542 -  | 1 |
| GenelD:269604   | Gpr157        | 4 | 150,087,503 | 150,105,927 | 18,424 +  | 1 |
| GenelD:68703    | Rere          | 4 | 150,281,916 | 150,621,966 | 340,050 + | 1 |
| GenelD:73348    | 1700045H11Rik | 4 | 150,828,225 | 150,854,949 | 26,724 -  | 1 |
| GenelD:74155    | Errfi1        | 4 | 150,855,091 | 150,868,880 | 13,789 +  | 1 |
| GenelD:57320    | Park7         | 4 | 150,897,133 | 150,909,921 | 12,788 -  | 1 |
| GenelD:18628    | Per3          | 4 | 151,003,655 | 151,044,622 | 40,967 -  | 1 |
| GenelD:22319    | Vamp3         | 4 | 151,047,305 | 151,057,953 | 10,648 -  | 2 |
| GenelD:100072   | Camta1        | 4 | 151,059,523 | 151,861,768 | 802,245 - | 5 |
| GenelD:10004196 | 9230110K08Rik | 4 | 151,862,033 | 151,863,304 | 1,271 +   | 1 |
| GenelD:230935   | Dnajc11       | 4 | 151,933,720 | 151,981,959 | 48,239 +  | 2 |
| GenelD:69876    | Thap3         | 4 | 151,982,638 | 151,988,986 | 6,348 -   | 3 |
| GenelD:230936   | Phf13         | 4 | 151,989,631 | 151,996,179 | 6,548 -   | 3 |
| GenelD:242785   | Klhl21        | 4 | 152,008,891 | 152,017,677 | 8,786 +   | 2 |
| GenelD:100090   | Zbtb48        | 4 | 152,019,776 | 152,027,671 | 7,895 -   | 2 |
| GenelD:110326   | Tas1r1        | 4 | 152,027,914 | 152,038,490 | 10,576 -  | 2 |
| GenelD:74035    | Nol9          | 4 | 152,039,327 | 152,061,494 | 22,167 +  | 1 |
| GenelD:269608   | Plekhg5       | 4 | 152,096,719 | 152,115,400 | 18,681 +  | 1 |

|                 |               |   |             |             |           |   |
|-----------------|---------------|---|-------------|-------------|-----------|---|
| GenelD:85030    | Tnfrsf25      | 4 | 152,116,343 | 152,120,111 | 3,768 +   | 1 |
| GenelD:56226    | Espn          | 4 | 152,120,876 | 152,152,207 | 31,331 -  | 4 |
| GenelD:10050473 | Gm20377       | 4 | 152,156,049 | 152,157,564 | 1,515 -   | 1 |
| GenelD:15206    | Hes2          | 4 | 152,158,867 | 152,162,469 | 3,602 +   | 1 |
| GenelD:70025    | Acot7         | 4 | 152,178,100 | 152,271,855 | 93,755 +  | 1 |
| GenelD:100129   | Gpr153        | 4 | 152,274,362 | 152,285,337 | 10,975 +  | 1 |
| GenelD:15207    | Hes3          | 4 | 152,285,972 | 152,291,662 | 5,690 -   | 2 |
| GenelD:57295    | Icmt          | 4 | 152,297,214 | 152,307,126 | 9,912 +   | 1 |
| GenelD:433809   | Rnf207        | 4 | 152,307,023 | 152,318,625 | 11,602 -  | 2 |
| GenelD:19934    | Rpl22         | 4 | 152,325,878 | 152,334,071 | 8,193 +   | 1 |
| GenelD:230959   | Ajap1         | 4 | 153,373,221 | 153,482,830 | 109,609 - | 1 |
| GenelD:407793   | BC039966      | 4 | 153,948,455 | 153,950,476 | 2,021 -   | 1 |
| GenelD:97159    | A430005L14Rik | 4 | 153,957,237 | 153,961,925 | 4,688 +   | 1 |
| GenelD:13368    | Dffb          | 4 | 153,964,449 | 153,975,081 | 10,632 -  | 2 |
| GenelD:230967   | Cep104        | 4 | 153,975,561 | 154,007,225 | 31,664 +  | 2 |
| GenelD:72946    | Lrrc47        | 4 | 154,011,803 | 154,021,512 | 9,709 +   | 1 |
| GenelD:68859    | Smim1         | 4 | 154,020,470 | 154,026,044 | 5,574 -   | 1 |
| GenelD:59002    | Wrap73        | 4 | 154,142,372 | 154,156,818 | 14,446 +  | 2 |
| GenelD:67808    | Tprgl         | 4 | 154,157,485 | 154,160,684 | 3,199 -   | 2 |
| GenelD:230971   | Megf6         | 4 | 154,170,713 | 154,275,721 | 105,008 + | 2 |
| GenelD:70673    | Prdm16        | 4 | 154,316,125 | 154,636,873 | 320,748 - | 1 |
| GenelD:320939   | 5930403L14Rik | 4 | 154,630,691 | 154,636,367 | 5,676 -   | 1 |
| GenelD:10004217 | Gm13111       | 4 | 154,636,914 | 154,644,724 | 7,810 +   | 1 |
| GenelD:15208    | Hes5          | 4 | 154,960,923 | 154,962,371 | 1,448 +   | 2 |
| GenelD:269614   | Pank4         | 4 | 154,964,133 | 154,980,938 | 16,805 +  | 2 |
| GenelD:67830    | Rer1          | 4 | 155,074,112 | 155,086,297 | 12,185 -  | 1 |
| GenelD:76866    | Morn1         | 4 | 155,086,577 | 155,145,507 | 58,930 +  | 2 |
| GenelD:20481    | Ski           | 4 | 155,154,075 | 155,222,535 | 68,460 -  | 2 |
| GenelD:10050266 | Gm19313       | 4 | 155,210,595 | 155,212,222 | 1,627 -   | 1 |
| GenelD:67513    | 2610002J02Rik | 4 | 155,249,966 | 155,256,687 | 6,721 +   | 1 |
| GenelD:18762    | Prkcz         | 4 | 155,260,120 | 155,361,391 | 101,271 - | 1 |
| GenelD:14688    | Gnb1          | 4 | 155,491,361 | 155,559,269 | 67,908 +  | 1 |
| GenelD:12537    | Cdk11b        | 4 | 155,624,869 | 155,649,932 | 25,063 +  | 2 |
| GenelD:26561    | Mmp23         | 4 | 155,650,655 | 155,653,384 | 2,729 -   | 2 |
| GenelD:76580    | Mib2          | 4 | 155,654,470 | 155,669,254 | 14,784 -  | 3 |
| GenelD:230991   | B930041F14Rik | 4 | 155,694,342 | 155,696,485 | 2,143 +   | 2 |
| GenelD:68991    | Ssu72         | 4 | 155,704,815 | 155,733,879 | 29,064 +  | 2 |
| GenelD:108888   | Atad3a        | 4 | 155,740,640 | 155,761,098 | 20,458 -  | 1 |
| GenelD:70448    | 2610204G22Rik | 4 | 155,761,192 | 155,763,560 | 2,368 +   | 1 |
| GenelD:246228   | Vwa1          | 4 | 155,768,495 | 155,774,561 | 6,066 -   | 2 |
| GenelD:320587   | Tmem88b       | 4 | 155,781,591 | 155,785,874 | 4,283 -   | 1 |
| GenelD:242805   | Ankrd65       | 4 | 155,791,172 | 155,793,182 | 2,010 +   | 1 |
| GenelD:66448    | Mrpl20        | 4 | 155,803,618 | 155,808,829 | 5,211 +   | 2 |
| GenelD:56036    | Ccnl2         | 4 | 155,812,489 | 155,824,543 | 12,054 +  | 3 |
| GenelD:66077    | Aurkaip1      | 4 | 155,831,269 | 155,833,098 | 1,829 +   | 1 |
| GenelD:74761    | Mxra8         | 4 | 155,839,680 | 155,844,102 | 4,422 +   | 2 |
| GenelD:13542    | Dvl1          | 4 | 155,847,412 | 155,859,303 | 11,891 +  | 3 |

|                 |               |   |             |             |             |   |
|-----------------|---------------|---|-------------|-------------|-------------|---|
| GenelD:83771    | Tas1r3        | 4 | 155,859,268 | 155,863,353 | 4,085 -     | 2 |
| GenelD:79554    | Gltpd1        | 4 | 155,864,723 | 155,869,440 | 4,717 -     | 2 |
| GenelD:71957    | Cpsf3l        | 4 | 155,869,567 | 155,889,103 | 19,536 +    | 3 |
| GenelD:433813   | Pusl1         | 4 | 155,888,857 | 155,891,762 | 2,905 -     | 1 |
| GenelD:140500   | Acap3         | 4 | 155,891,875 | 155,907,251 | 15,376 +    | 1 |
| GenelD:140499   | Ube2j2        | 4 | 155,943,831 | 155,959,604 | 15,773 +    | 1 |
| GenelD:117592   | B3galt6       | 4 | 155,989,466 | 155,992,678 | 3,212 -     | 1 |
| GenelD:20318    | Sdf4          | 4 | 155,992,914 | 156,013,610 | 20,696 +    | 1 |
| GenelD:11603    | Agrn          | 4 | 156,165,290 | 156,197,488 | 32,198 -    | 2 |
| GenelD:10003888 | Isg15         | 4 | 156,199,424 | 156,200,818 | 1,394 -     | 1 |
| GenelD:100382   | AW011738      | 4 | 156,203,284 | 156,206,028 | 2,744 +     | 1 |
| GenelD:231002   | Plekhn1       | 4 | 156,221,456 | 156,228,542 | 7,086 -     | 1 |
| GenelD:231003   | Klhl17        | 4 | 156,229,044 | 156,234,857 | 5,813 -     | 1 |
| GenelD:57741    | Noc2l         | 4 | 156,236,010 | 156,247,616 | 11,606 +    | 1 |
| GenelD:12571    | Cdk6          | 5 | 3,344,312   | 3,522,225   | 177,913 +   | 3 |
| GenelD:70797    | Ankib1        | 5 | 3,690,000   | 3,803,109   | 113,109 -   | 1 |
| GenelD:79264    | Krit1         | 5 | 3,803,165   | 3,844,515   | 41,350 +    | 1 |
| GenelD:100986   | Akap9         | 5 | 3,928,186   | 4,080,204   | 152,018 +   | 1 |
| GenelD:13121    | Cyp51         | 5 | 4,080,674   | 4,104,697   | 24,023 -    | 1 |
| GenelD:14362    | Fzd1          | 5 | 4,753,839   | 4,758,216   | 4,377 -     | 1 |
| GenelD:70358    | Steap1        | 5 | 5,736,322   | 5,749,317   | 12,995 -    | 1 |
| GenelD:27214    | Dbf4          | 5 | 8,396,969   | 8,422,716   | 25,747 -    | 1 |
| GenelD:319653   | Slc25a40      | 5 | 8,422,850   | 8,454,793   | 31,943 +    | 1 |
| GenelD:242819   | Rundc3b       | 5 | 8,490,336   | 8,622,952   | 132,616 -   | 1 |
| GenelD:74114    | Crot          | 5 | 8,966,048   | 8,997,146   | 31,098 -    | 1 |
| GenelD:652925   | Tmem243       | 5 | 9,100,737   | 9,118,983   | 18,246 +    | 1 |
| GenelD:23857    | Dmtf1         | 5 | 9,118,868   | 9,161,776   | 42,908 -    | 1 |
| GenelD:319689   | Gm17739       | 5 | 9,156,287   | 9,160,986   | 4,699 -     | 1 |
| GenelD:108151   | Sema3d        | 5 | 12,383,166  | 12,588,943  | 205,777 +   | 1 |
| GenelD:26875    | Pclo          | 5 | 14,514,918  | 14,863,459  | 348,541 +   | 1 |
| GenelD:14677    | Gnai1         | 5 | 18,265,135  | 18,360,413  | 95,278 -    | 1 |
| GenelD:70832    | 4921504A21Rik | 5 | 19,202,378  | 19,226,679  | 24,301 -    | 1 |
| GenelD:50791    | Magi2         | 5 | 19,227,046  | 20,704,792  | 1,477,746 + | 2 |
| GenelD:242860   | Rsbni1        | 5 | 20,893,024  | 20,951,822  | 58,798 -    | 1 |
| GenelD:320770   | A630072M18Rik | 5 | 20,950,989  | 20,956,398  | 5,409 +     | 1 |
| GenelD:19248    | Ptpn12        | 5 | 20,986,645  | 21,055,797  | 69,152 -    | 1 |
| GenelD:22791    | Dnajc2        | 5 | 21,757,277  | 21,785,165  | 27,888 -    | 2 |
| GenelD:19181    | Psmc2         | 5 | 21,785,283  | 21,803,784  | 18,501 +    | 2 |
| GenelD:269630   | 5031425E22Rik | 5 | 23,431,808  | 23,434,353  | 2,545 -     | 1 |
| GenelD:69188    | Mll5          | 5 | 23,434,429  | 23,504,229  | 69,800 +    | 1 |
| GenelD:433855   | Al506816      | 5 | 23,692,261  | 23,712,667  | 20,406 -    | 1 |
| GenelD:10105610 | LOC101056102  | 5 | 23,701,164  | 23,702,705  | 1,541 -     | 1 |
| GenelD:10052650 | Mir3096       | 5 | 23,710,976  | 23,711,076  | 100 -       | 1 |
| GenelD:78697    | Pus7          | 5 | 23,740,696  | 23,783,661  | 42,965 -    | 1 |
| GenelD:72772    | Rint1         | 5 | 23,787,744  | 23,820,369  | 32,625 +    | 1 |
| GenelD:84652    | Fam126a       | 5 | 23,960,931  | 24,030,683  | 69,752 -    | 1 |
| GenelD:52323    | Klhl7         | 5 | 24,100,590  | 24,161,231  | 60,641 +    | 2 |

|                 |               |   |            |            |           |   |
|-----------------|---------------|---|------------|------------|-----------|---|
| GenelD:231042   | Nupl2         | 5 | 24,164,963 | 24,184,008 | 19,045 +  | 1 |
| GenelD:16511    | Kcnh2         | 5 | 24,319,589 | 24,351,604 | 32,015 -  | 1 |
| GenelD:18127    | Nos3          | 5 | 24,364,819 | 24,384,474 | 19,655 +  | 1 |
| GenelD:213948   | Atg9b         | 5 | 24,384,181 | 24,392,143 | 7,962 -   | 1 |
| GenelD:74610    | Abcb8         | 5 | 24,394,156 | 24,409,947 | 15,791 +  | 1 |
| GenelD:66587    | Fastk         | 5 | 24,441,040 | 24,445,235 | 4,195 -   | 1 |
| GenelD:64295    | Tmub1         | 5 | 24,445,463 | 24,447,846 | 2,383 -   | 1 |
| GenelD:213990   | Agap3         | 5 | 24,452,177 | 24,502,047 | 49,870 +  | 2 |
| GenelD:27407    | Abcf2         | 5 | 24,565,341 | 24,577,467 | 12,126 -  | 2 |
| GenelD:10004234 | Gm10221       | 5 | 24,581,452 | 24,581,905 | 453 -     | 2 |
| GenelD:100910   | Chpf2         | 5 | 24,586,750 | 24,592,487 | 5,737 +   | 3 |
| GenelD:735264   | Mir671        | 5 | 24,592,114 | 24,592,211 | 97 +      | 2 |
| GenelD:66993    | Smarcd3       | 5 | 24,592,622 | 24,602,002 | 9,380 -   | 2 |
| GenelD:269633   | Wdr86         | 5 | 24,712,269 | 24,730,680 | 18,411 -  | 1 |
| GenelD:19744    | Rheb          | 5 | 24,802,823 | 24,842,361 | 39,538 -  | 1 |
| GenelD:108099   | Prkag2        | 5 | 24,862,735 | 25,100,642 | 237,907 - | 1 |
| GenelD:67261    | 2900005J15Rik | 5 | 25,100,975 | 25,103,007 | 2,032 +   | 1 |
| GenelD:231051   | Mll3          | 5 | 25,271,794 | 25,498,783 | 226,989 - | 2 |
| GenelD:320965   | 4831440E17Rik | 5 | 25,499,797 | 25,504,473 | 4,676 +   | 2 |
| GenelD:73571    | 1700096K18Rik | 5 | 25,530,018 | 25,531,466 | 1,448 +   | 1 |
| GenelD:10086235 | Gm21671       | 5 | 25,949,797 | 25,954,344 | 4,547 -   | 1 |
| GenelD:55982    | Paxip1        | 5 | 27,740,665 | 27,791,339 | 50,674 -  | 1 |
| GenelD:231070   | Insig1        | 5 | 28,071,412 | 28,078,662 | 7,250 +   | 1 |
| GenelD:13799    | En2           | 5 | 28,165,696 | 28,172,166 | 6,470 +   | 1 |
| GenelD:381626   | Rbm33         | 5 | 28,317,189 | 28,419,242 | 102,053 + | 1 |
| GenelD:56873    | Lmbr1         | 5 | 29,229,802 | 29,378,390 | 148,588 - | 1 |
| GenelD:78263    | 4632411P08Rik | 5 | 29,378,465 | 29,390,488 | 12,023 +  | 1 |
| GenelD:100763   | Ube3c         | 5 | 29,569,242 | 29,676,077 | 106,835 + | 1 |
| GenelD:332993   | Gm5129        | 5 | 29,735,334 | 29,735,936 | 602 -     | 1 |
| GenelD:23950    | Dnajb6        | 5 | 29,735,898 | 29,786,478 | 50,580 +  | 1 |
| GenelD:97212    | Hadha         | 5 | 30,118,304 | 30,154,980 | 36,676 -  | 1 |
| GenelD:231086   | Hadhb         | 5 | 30,155,322 | 30,184,583 | 29,261 +  | 1 |
| GenelD:10050282 | Gm9899        | 5 | 30,573,987 | 30,588,619 | 14,632 -  | 1 |
| GenelD:16527    | Kcnk3         | 5 | 30,588,170 | 30,625,270 | 37,100 +  | 1 |
| GenelD:74919    | Slc35f6       | 5 | 30,647,939 | 30,659,729 | 11,790 +  | 2 |
| GenelD:12615    | Cenpa         | 5 | 30,666,902 | 30,674,826 | 7,924 +   | 1 |
| GenelD:100732   | Mapre3        | 5 | 30,814,756 | 30,866,106 | 51,350 +  | 2 |
| GenelD:10050284 | Gm19409       | 5 | 30,815,620 | 30,818,477 | 2,857 +   | 1 |
| GenelD:68796    | Tmem214       | 5 | 30,869,647 | 30,877,467 | 7,820 +   | 1 |
| GenelD:231093   | Agbl5         | 5 | 30,888,852 | 30,906,666 | 17,814 +  | 2 |
| GenelD:67695    | Ost4          | 5 | 30,906,518 | 30,907,788 | 1,270 -   | 2 |
| GenelD:100952   | Emilin1       | 5 | 30,913,786 | 30,921,275 | 7,489 +   | 2 |
| GenelD:16548    | Khk           | 5 | 30,921,895 | 30,931,246 | 9,351 +   | 1 |
| GenelD:58522    | Trim54        | 5 | 31,116,612 | 31,137,626 | 21,014 +  | 1 |
| GenelD:22226    | Ucn           | 5 | 31,137,989 | 31,138,895 | 906 -     | 1 |
| GenelD:17527    | Mpv17         | 5 | 31,140,660 | 31,154,242 | 13,582 -  | 1 |
| GenelD:13667    | Eif2b4        | 5 | 31,187,558 | 31,193,139 | 5,581 -   | 1 |

|                 |               |   |            |            |           |   |
|-----------------|---------------|---|------------|------------|-----------|---|
| GenelD:266781   | Snx17         | 5 | 31,193,304 | 31,198,900 | 5,596 +   | 1 |
| GenelD:101023   | Zfp513        | 5 | 31,198,981 | 31,202,303 | 3,322 -   | 1 |
| GenelD:14208    | Ppm1g         | 5 | 31,202,668 | 31,220,545 | 17,877 -  | 2 |
| GenelD:192292   | Nrbp1         | 5 | 31,240,918 | 31,251,563 | 10,645 +  | 2 |
| GenelD:69815    | Krtcap3       | 5 | 31,251,706 | 31,253,197 | 1,491 +   | 1 |
| GenelD:67661    | Ift172        | 5 | 31,253,279 | 31,291,114 | 37,835 -  | 1 |
| GenelD:64339    | Fndc4         | 5 | 31,292,246 | 31,295,877 | 3,631 -   | 1 |
| GenelD:231103   | Gckr          | 5 | 31,297,581 | 31,327,302 | 29,721 +  | 1 |
| GenelD:66845    | Mrpl33        | 5 | 31,613,951 | 31,622,644 | 8,693 +   | 1 |
| GenelD:71336    | Rbks          | 5 | 31,624,439 | 31,697,610 | 73,171 -  | 2 |
| GenelD:107976   | Bre           | 5 | 31,698,050 | 32,084,739 | 386,689 + | 1 |
| GenelD:10003862 | Gm10463       | 5 | 32,130,283 | 32,133,171 | 2,888 -   | 2 |
| GenelD:14284    | Fosl2         | 5 | 32,136,472 | 32,157,840 | 21,368 +  | 2 |
| GenelD:22612    | Yes1          | 5 | 32,611,171 | 32,687,066 | 75,895 +  | 1 |
| GenelD:320951   | Pisd          | 5 | 32,736,314 | 32,785,626 | 49,312 -  | 1 |
| GenelD:215476   | Prr14l        | 5 | 32,789,207 | 32,854,230 | 65,023 -  | 2 |
| GenelD:277854   | Depdc5        | 5 | 32,863,721 | 32,994,233 | 130,512 + | 1 |
| GenelD:22629    | Ywhah         | 5 | 33,018,816 | 33,027,966 | 9,150 +   | 2 |
| GenelD:59003    | Maea          | 5 | 33,335,572 | 33,373,294 | 37,722 +  | 1 |
| GenelD:20492    | Slbp          | 5 | 33,640,062 | 33,652,306 | 12,244 -  | 1 |
| GenelD:68366    | Tmem129       | 5 | 33,653,216 | 33,657,832 | 4,616 -   | 1 |
| GenelD:21335    | Tacc3         | 5 | 33,658,147 | 33,672,198 | 14,051 +  | 1 |
| GenelD:14184    | Fgfr3         | 5 | 33,721,724 | 33,737,068 | 15,344 +  | 1 |
| GenelD:56384    | Letm1         | 5 | 33,741,352 | 33,782,704 | 41,352 -  | 1 |
| GenelD:24116    | Nelfa         | 5 | 33,898,179 | 33,936,258 | 38,079 -  | 1 |
| GenelD:381633   | Gm1673        | 5 | 33,983,474 | 33,985,006 | 1,532 +   | 1 |
| GenelD:269642   | Nat8l         | 5 | 33,995,984 | 34,005,916 | 9,932 +   | 1 |
| GenelD:272158   | Poln          | 5 | 34,007,198 | 34,169,448 | 162,250 - | 1 |
| GenelD:231125   | Zfyve28       | 5 | 34,194,894 | 34,288,324 | 93,430 -  | 1 |
| GenelD:10086206 | Gm21446       | 5 | 34,297,509 | 34,327,327 | 29,818 +  | 2 |
| GenelD:19822    | Rnf4          | 5 | 34,336,390 | 34,353,430 | 17,040 +  | 1 |
| GenelD:231130   | Tnip2         | 5 | 34,496,096 | 34,513,979 | 17,883 -  | 1 |
| GenelD:24055    | Sh3bp2        | 5 | 34,525,784 | 34,563,639 | 37,855 +  | 1 |
| GenelD:11518    | Add1          | 5 | 34,573,714 | 34,632,305 | 58,591 +  | 2 |
| GenelD:68294    | Mfsd10        | 5 | 34,633,647 | 34,637,114 | 3,467 -   | 1 |
| GenelD:75416    | Nop14         | 5 | 34,638,536 | 34,660,148 | 21,612 -  | 1 |
| GenelD:15194    | Htt           | 5 | 34,761,740 | 34,912,521 | 150,781 + | 1 |
| GenelD:403174   | Msantd1       | 5 | 34,915,915 | 34,923,839 | 7,924 +   | 1 |
| GenelD:71729    | Rgs12         | 5 | 34,949,448 | 35,033,595 | 84,147 +  | 1 |
| GenelD:442795   | E130018O15Rik | 5 | 35,379,152 | 35,388,476 | 9,324 -   | 1 |
| GenelD:15371    | Hmx1          | 5 | 35,389,117 | 35,392,872 | 3,755 +   | 1 |
| GenelD:78890    | Trmt44        | 5 | 35,556,209 | 35,575,070 | 18,861 -  | 1 |
| GenelD:74364    | 4931431C16Rik | 5 | 35,581,227 | 35,588,763 | 7,536 -   | 1 |
| GenelD:80911    | Acox3         | 5 | 35,583,060 | 35,613,801 | 30,741 +  | 1 |
| GenelD:78558    | Htra3         | 5 | 35,652,033 | 35,679,782 | 27,749 -  | 2 |
| GenelD:231147   | Sh3tc1        | 5 | 35,697,180 | 35,729,276 | 32,096 -  | 1 |
| GenelD:231148   | Ablim2        | 5 | 35,757,880 | 35,884,979 | 127,099 + | 1 |

|                 |               |   |            |            |           |   |
|-----------------|---------------|---|------------|------------|-----------|---|
| GenelD:70292    | Afap1         | 5 | 35,893,319 | 36,003,922 | 110,603 + | 1 |
| GenelD:81840    | Sorcs2        | 5 | 36,017,180 | 36,398,139 | 380,959 - | 1 |
| GenelD:17713    | Grpel1        | 5 | 36,465,185 | 36,474,077 | 8,892 +   | 1 |
| GenelD:231151   | Tada2b        | 5 | 36,473,670 | 36,484,285 | 10,615 -  | 1 |
| GenelD:66717    | Ccdc96        | 5 | 36,484,588 | 36,488,171 | 3,583 +   | 1 |
| GenelD:100855   | Tbc1d14       | 5 | 36,490,604 | 36,586,226 | 95,622 -  | 2 |
| GenelD:117197   | Bloc1s4       | 5 | 36,747,374 | 36,748,679 | 1,305 -   | 1 |
| GenelD:67568    | Mrfap1        | 5 | 36,794,867 | 36,796,754 | 1,887 -   | 1 |
| GenelD:17160    | Man2b2        | 5 | 36,806,813 | 36,830,649 | 23,836 -  | 2 |
| GenelD:12933    | Crmp1         | 5 | 37,242,080 | 37,292,133 | 50,053 +  | 1 |
| GenelD:59056    | Evc           | 5 | 37,299,171 | 37,336,881 | 37,710 -  | 1 |
| GenelD:68525    | Evc2          | 5 | 37,338,478 | 37,425,054 | 86,576 +  | 1 |
| GenelD:17701    | Msx1          | 5 | 37,820,491 | 37,824,585 | 4,094 -   | 1 |
| GenelD:93895    | Msx1as        | 5 | 37,820,564 | 37,822,751 | 2,187 +   | 1 |
| GenelD:71116    | Stx18         | 5 | 38,039,235 | 38,136,818 | 97,583 +  | 1 |
| GenelD:18196    | Nsg1          | 5 | 38,137,193 | 38,159,467 | 22,274 -  | 1 |
| GenelD:75079    | Zbtb49        | 5 | 38,200,044 | 38,220,428 | 20,384 -  | 1 |
| GenelD:17089    | Lyar          | 5 | 38,220,482 | 38,234,306 | 13,824 +  | 1 |
| GenelD:66309    | Tmem128       | 5 | 38,260,375 | 38,269,618 | 9,243 +   | 1 |
| GenelD:22388    | Wdr1          | 5 | 38,526,813 | 38,561,595 | 34,782 -  | 1 |
| GenelD:100515   | Zfp518b       | 5 | 38,668,484 | 38,684,826 | 16,342 -  | 1 |
| GenelD:100972   | Rab28         | 5 | 41,624,976 | 41,708,155 | 83,179 -  | 1 |
| GenelD:665775   | Bod1l         | 5 | 41,787,538 | 41,844,315 | 56,777 -  | 1 |
| GenelD:665934   | Gm7854        | 5 | 43,151,686 | 43,235,354 | 83,668 -  | 1 |
| GenelD:231207   | Cpeb2         | 5 | 43,233,463 | 43,289,724 | 56,261 +  | 1 |
| GenelD:242960   | Fbxl5         | 5 | 43,744,618 | 43,782,149 | 37,531 -  | 1 |
| GenelD:66988    | Lap3          | 5 | 45,493,374 | 45,512,691 | 19,317 +  | 2 |
| GenelD:66999    | Med28         | 5 | 45,520,229 | 45,529,284 | 9,055 +   | 1 |
| GenelD:58227    | Fam184b       | 5 | 45,529,705 | 45,639,501 | 109,796 - | 2 |
| GenelD:69788    | 1600023N17Rik | 5 | 45,668,702 | 45,669,708 | 1,006 -   | 1 |
| GenelD:54392    | Ncapg         | 5 | 45,669,925 | 45,700,547 | 30,622 +  | 1 |
| GenelD:209707   | Lcorl         | 5 | 45,697,184 | 45,857,540 | 160,356 - | 1 |
| GenelD:20563    | Slit2         | 5 | 47,983,155 | 48,305,778 | 322,623 + | 1 |
| GenelD:70693    | Gpr125        | 5 | 49,959,951 | 50,058,996 | 99,045 -  | 1 |
| GenelD:13204    | Dhx15         | 5 | 52,150,209 | 52,190,519 | 40,310 -  | 1 |
| GenelD:414108   | 9230114K14Rik | 5 | 52,190,681 | 52,197,984 | 7,303 +   | 1 |
| GenelD:414111   | C130083M11Rik | 5 | 52,199,984 | 52,216,433 | 16,449 -  | 1 |
| GenelD:211006   | Sepsecs       | 5 | 52,643,407 | 52,669,701 | 26,294 -  | 1 |
| GenelD:19664    | Rbpj          | 5 | 53,555,779 | 53,657,445 | 101,666 + | 1 |
| GenelD:116873   | Stim2         | 5 | 53,998,523 | 54,121,057 | 122,534 + | 1 |
| GenelD:319216   | 4932441J04Rik | 5 | 57,570,084 | 57,717,919 | 147,835 - | 1 |
| GenelD:54216    | Pcdh7         | 5 | 57,718,021 | 58,132,240 | 414,219 + | 1 |
| GenelD:100532   | Rell1         | 5 | 63,908,898 | 63,968,897 | 59,999 -  | 1 |
| GenelD:57915    | Tbc1d1        | 5 | 64,160,211 | 64,351,486 | 191,275 + | 1 |
| GenelD:10050404 | Gm20033       | 5 | 64,802,029 | 64,804,329 | 2,300 -   | 2 |
| GenelD:16599    | Klf3          | 5 | 64,803,523 | 64,830,129 | 26,606 +  | 2 |
| GenelD:21899    | Tlr6          | 5 | 64,953,095 | 64,960,034 | 6,939 -   | 1 |



|                 |               |   |            |            |           |   |
|-----------------|---------------|---|------------|------------|-----------|---|
| GenelD:68303    | Fam114a1      | 5 | 64,970,075 | 65,041,901 | 71,826 +  | 1 |
| GenelD:10012445 | Mir574        | 5 | 64,970,318 | 64,970,395 | 77 +      | 1 |
| GenelD:19687    | Rfc1          | 5 | 65,261,852 | 65,335,639 | 73,787 -  | 1 |
| GenelD:83379    | Klb           | 5 | 65,348,411 | 65,384,003 | 35,592 +  | 1 |
| GenelD:20005    | Rpl9          | 5 | 65,388,364 | 65,391,431 | 3,067 -   | 1 |
| GenelD:79464    | Lias          | 5 | 65,391,497 | 65,409,207 | 17,710 +  | 1 |
| GenelD:22235    | Ugdh          | 5 | 65,413,221 | 65,435,842 | 22,621 -  | 1 |
| GenelD:68552    | Smim14        | 5 | 65,448,755 | 65,492,835 | 44,080 -  | 1 |
| GenelD:53323    | Ube2k         | 5 | 65,537,261 | 65,598,989 | 61,728 +  | 1 |
| GenelD:71521    | Pds5a         | 5 | 65,615,260 | 65,697,856 | 82,596 -  | 1 |
| GenelD:333789   | N4bp2         | 5 | 65,763,521 | 65,826,784 | 63,263 +  | 1 |
| GenelD:11787    | Apbb2         | 5 | 66,298,725 | 66,618,817 | 320,092 - | 1 |
| GenelD:77569    | Limch1        | 5 | 66,745,840 | 67,057,159 | 311,319 + | 1 |
| GenelD:67878    | Tmem33        | 5 | 67,260,652 | 67,291,461 | 30,809 +  | 1 |
| GenelD:109108   | Slc30a9       | 5 | 67,306,957 | 67,356,145 | 49,188 +  | 1 |
| GenelD:330096   | Shisa3        | 5 | 67,607,883 | 67,613,987 | 6,104 +   | 1 |
| GenelD:11980    | Atp8a1        | 5 | 67,618,140 | 67,847,431 | 229,291 - | 2 |
| GenelD:243043   | Kctd8         | 5 | 69,109,285 | 69,341,709 | 232,424 - | 1 |
| GenelD:100978   | Nfxl1         | 5 | 72,513,304 | 72,559,645 | 46,341 -  | 1 |
| GenelD:75991    | Slain2        | 5 | 72,914,317 | 72,978,828 | 64,511 +  | 1 |
| GenelD:231290   | Slc10a4       | 5 | 73,006,904 | 73,012,955 | 6,051 +   | 1 |
| GenelD:72313    | Fryl          | 5 | 73,020,191 | 73,256,618 | 236,427 - | 1 |
| GenelD:100737   | Dcun1d4       | 5 | 73,481,055 | 73,560,794 | 79,739 +  | 1 |
| GenelD:69727    | Usp46         | 5 | 74,000,038 | 74,068,411 | 68,373 -  | 1 |
| GenelD:70036    | Dancr         | 5 | 74,093,083 | 74,094,336 | 1,253 +   | 1 |
| GenelD:10031394 | Snora26       | 5 | 74,093,530 | 74,093,650 | 120 +     | 1 |
| GenelD:68939    | Rasl11b       | 5 | 74,195,326 | 74,199,477 | 4,151 +   | 1 |
| GenelD:212986   | Scfd2         | 5 | 74,204,816 | 74,531,749 | 326,933 - | 3 |
| GenelD:66899    | Fip111        | 5 | 74,535,482 | 74,597,124 | 61,642 +  | 2 |
| GenelD:74277    | Chic2         | 5 | 75,006,424 | 75,044,626 | 38,202 -  | 1 |
| GenelD:10050318 | Gm19583       | 5 | 75,110,321 | 75,147,107 | 36,786 +  | 2 |
| GenelD:18595    | Pdgfra        | 5 | 75,152,291 | 75,198,204 | 45,913 +  | 2 |
| GenelD:16542    | Kdr           | 5 | 75,933,265 | 75,978,428 | 45,163 -  | 1 |
| GenelD:57357    | Srd5a3        | 5 | 76,140,273 | 76,155,503 | 15,230 +  | 1 |
| GenelD:21982    | Tmem165       | 5 | 76,183,880 | 76,209,244 | 25,364 +  | 1 |
| GenelD:12753    | Clock         | 5 | 76,212,177 | 76,304,548 | 92,371 -  | 1 |
| GenelD:665055   | Gm7467        | 5 | 76,304,882 | 76,305,527 | 645 +     | 1 |
| GenelD:79455    | Pdcl2         | 5 | 76,312,146 | 76,331,111 | 18,965 -  | 1 |
| GenelD:56183    | Nmu           | 5 | 76,333,495 | 76,363,777 | 30,282 -  | 1 |
| GenelD:381644   | Cep135        | 5 | 76,591,714 | 76,646,466 | 54,752 +  | 1 |
| GenelD:320411   | A730089K16Rik | 5 | 76,655,531 | 76,658,428 | 2,897 -   | 1 |
| GenelD:67054    | Paics         | 5 | 76,951,411 | 76,967,505 | 16,094 +  | 1 |
| GenelD:66661    | Srp72         | 5 | 76,974,701 | 76,999,935 | 25,234 +  | 1 |
| GenelD:19712    | Rest          | 5 | 77,265,494 | 77,283,697 | 18,203 +  | 1 |
| GenelD:10062857 | Mir5098       | 5 | 77,272,757 | 77,272,838 | 81 +      | 1 |
| GenelD:29817    | Igfbp7        | 5 | 77,349,240 | 77,408,045 | 58,805 -  | 1 |
| GenelD:319387   | Lphn3         | 5 | 81,021,593 | 81,795,730 | 774,137 + | 1 |

|                 |               |   |             |             |           |   |
|-----------------|---------------|---|-------------|-------------|-----------|---|
| GenelD:231386   | Ythdc1        | 5 | 86,804,490  | 86,836,657  | 32,167 +  | 1 |
| GenelD:65961    | Utp3          | 5 | 88,554,483  | 88,556,083  | 1,600 +   | 2 |
| GenelD:231413   | Grsf1         | 5 | 88,659,237  | 88,676,171  | 16,934 -  | 1 |
| GenelD:68473    | Mob1b         | 5 | 88,720,871  | 88,758,455  | 37,584 +  | 1 |
| GenelD:330119   | Adamts3       | 5 | 89,673,841  | 89,883,334  | 209,493 - | 1 |
| GenelD:81702    | Ankrd17       | 5 | 90,227,166  | 90,366,185  | 139,019 - | 1 |
| GenelD:791294   | Gm9958        | 5 | 90,366,997  | 90,368,488  | 1,491 +   | 1 |
| GenelD:68098    | Rchy1         | 5 | 91,948,904  | 91,963,068  | 14,164 -  | 1 |
| GenelD:23881    | G3bp2         | 5 | 92,052,146  | 92,083,735  | 31,589 -  | 1 |
| GenelD:56041    | Uso1          | 5 | 92,137,938  | 92,202,795  | 64,857 +  | 1 |
| GenelD:10004060 | Gm15710       | 5 | 92,140,238  | 92,140,969  | 731 -     | 1 |
| GenelD:231452   | Sdad1         | 5 | 92,284,010  | 92,310,024  | 26,014 -  | 1 |
| GenelD:269113   | Nup54         | 5 | 92,415,540  | 92,435,199  | 19,659 -  | 1 |
| GenelD:12492    | Scarb2        | 5 | 92,443,873  | 92,505,608  | 61,735 -  | 2 |
| GenelD:78088    | Sowahb        | 5 | 93,041,123  | 93,045,022  | 3,899 -   | 1 |
| GenelD:52398    | Sept11        | 5 | 93,093,457  | 93,174,958  | 81,501 +  | 1 |
| GenelD:12453    | Ccni          | 5 | 93,181,933  | 93,206,495  | 24,562 -  | 1 |
| GenelD:75610    | 2010109A12Rik | 5 | 93,206,518  | 93,213,474  | 6,956 +   | 1 |
| GenelD:12452    | Ccng2         | 5 | 93,267,573  | 93,276,231  | 8,658 +   | 1 |
| GenelD:231464   | Cnot6l        | 5 | 96,075,737  | 96,161,990  | 86,253 -  | 2 |
| GenelD:231470   | Fras1         | 5 | 96,373,955  | 96,784,728  | 410,773 + | 1 |
| GenelD:670358   | Gm9484        | 5 | 96,996,203  | 96,997,534  | 1,331 -   | 1 |
| GenelD:140780   | Bmp2k         | 5 | 96,997,689  | 97,091,048  | 93,359 +  | 1 |
| GenelD:231474   | Paqr3         | 5 | 97,082,329  | 97,111,596  | 29,267 -  | 1 |
| GenelD:97243    | Naa11         | 5 | 97,382,209  | 97,392,330  | 10,121 -  | 1 |
| GenelD:75814    | 4930467D21Rik | 5 | 97,392,417  | 97,588,126  | 195,709 + | 1 |
| GenelD:71914    | Antxr2        | 5 | 97,884,688  | 98,030,962  | 146,274 - | 1 |
| GenelD:14176    | Fgf5          | 5 | 98,254,184  | 98,277,030  | 22,846 +  | 1 |
| GenelD:75784    | 1700007G11Rik | 5 | 98,329,304  | 98,802,019  | 472,715 + | 1 |
| GenelD:320292   | Rasgef1b      | 5 | 99,217,420  | 99,252,927  | 35,507 -  | 1 |
| GenelD:319818   | A930011G23Rik | 5 | 99,297,244  | 99,729,060  | 431,816 - | 2 |
| GenelD:11991    | Hnrnpd        | 5 | 99,955,936  | 99,978,938  | 23,002 -  | 2 |
| GenelD:10105565 | LOC101055652  | 5 | 99,978,935  | 99,979,653  | 718 +     | 2 |
| GenelD:50926    | Hnrpdl        | 5 | 100,033,577 | 100,039,222 | 5,645 -   | 1 |
| GenelD:67870    | Enoph1        | 5 | 100,039,994 | 100,068,765 | 28,771 +  | 1 |
| GenelD:69162    | Sec31a        | 5 | 100,361,649 | 100,416,234 | 54,585 -  | 1 |
| GenelD:10050319 | 5430416N02Rik | 5 | 100,420,842 | 100,429,535 | 8,693 -   | 2 |
| GenelD:191578   | Helq          | 5 | 100,762,148 | 100,798,600 | 36,452 -  | 1 |
| GenelD:68735    | Mrps18c       | 5 | 100,798,759 | 100,804,467 | 5,708 +   | 1 |
| GenelD:70681    | Fam175a       | 5 | 100,804,802 | 100,820,935 | 16,133 -  | 1 |
| GenelD:72145    | Wdfy3         | 5 | 101,832,953 | 102,069,921 | 236,968 - | 1 |
| GenelD:10105566 | LOC101055666  | 5 | 102,069,185 | 102,071,782 | 2,597 +   | 1 |
| GenelD:17355    | Aff1          | 5 | 103,754,162 | 103,855,322 | 101,160 + | 1 |
| GenelD:246293   | Klhl8         | 5 | 103,862,050 | 103,911,229 | 49,179 -  | 1 |
| GenelD:18764    | Pkd2          | 5 | 104,459,457 | 104,505,819 | 46,362 +  | 1 |
| GenelD:100604   | Lrrc8c        | 5 | 105,519,471 | 105,608,954 | 89,483 +  | 1 |
| GenelD:231549   | Lrrc8d        | 5 | 105,699,969 | 105,815,215 | 115,246 + | 3 |

|                 |              |   |             |             |           |   |
|-----------------|--------------|---|-------------|-------------|-----------|---|
| GenelD:52397    | Zfp644       | 5 | 106,616,741 | 106,696,830 | 80,089 -  | 1 |
| GenelD:10050477 | LOC100504779 | 5 | 106,689,820 | 106,696,223 | 6,403 -   | 1 |
| GenelD:12545    | Cdc7         | 5 | 106,964,322 | 106,984,431 | 20,109 +  | 1 |
| GenelD:21814    | Tgfbr3       | 5 | 107,106,570 | 107,289,595 | 183,025 - | 1 |
| GenelD:14020    | Evi5         | 5 | 107,744,795 | 107,875,107 | 130,312 - | 1 |
| GenelD:10050367 | Rpl5         | 5 | 107,900,528 | 107,909,005 | 8,477 +   | 1 |
| GenelD:67266    | Fam69a       | 5 | 107,908,042 | 107,987,077 | 79,035 -  | 1 |
| GenelD:13486    | Dr1          | 5 | 108,268,897 | 108,280,521 | 11,624 +  | 1 |
| GenelD:10050380 | Gm10419      | 5 | 108,369,858 | 108,378,239 | 8,381 +   | 1 |
| GenelD:231580   | Gak          | 5 | 108,569,414 | 108,629,739 | 60,325 -  | 1 |
| GenelD:72392    | Tmem175      | 5 | 108,629,810 | 108,647,770 | 17,960 +  | 1 |
| GenelD:15932    | Idua         | 5 | 108,669,106 | 108,684,558 | 15,452 +  | 1 |
| GenelD:116701   | Fgfr1        | 5 | 108,694,229 | 108,706,950 | 12,721 +  | 1 |
| GenelD:403178   | Plcx1        | 5 | 110,099,969 | 110,105,953 | 5,984 +   | 2 |
| GenelD:107999   | Gtpbp6       | 5 | 110,103,977 | 110,108,197 | 4,220 -   | 2 |
| GenelD:675812   | Zfp605       | 5 | 110,110,092 | 110,129,794 | 19,702 +  | 2 |
| GenelD:269682   | Golga3       | 5 | 110,176,701 | 110,223,155 | 46,454 +  | 1 |
| GenelD:71782    | Ankle2       | 5 | 110,231,004 | 110,256,651 | 25,647 +  | 1 |
| GenelD:72542    | Pgam5        | 5 | 110,259,135 | 110,269,899 | 10,764 -  | 1 |
| GenelD:19301    | Pxmp2        | 5 | 110,274,286 | 110,286,168 | 11,882 -  | 1 |
| GenelD:381667   | Lrcl1        | 5 | 110,354,096 | 110,356,087 | 1,991 +   | 1 |
| GenelD:381668   | Fbrs1        | 5 | 110,361,751 | 110,448,503 | 86,752 -  | 3 |
| GenelD:100608   | Noc4l        | 5 | 110,648,419 | 110,653,382 | 4,963 -   | 1 |
| GenelD:69663    | Ddx51        | 5 | 110,653,451 | 110,660,496 | 7,045 +   | 1 |
| GenelD:75560    | Ep400        | 5 | 110,664,373 | 110,770,717 | 106,344 - | 1 |
| GenelD:10050404 | Gm15559      | 5 | 110,770,949 | 110,779,260 | 8,311 +   | 1 |
| GenelD:56361    | Pus1         | 5 | 110,773,667 | 110,780,615 | 6,948 -   | 1 |
| GenelD:22241    | Ulk1         | 5 | 110,784,489 | 110,810,081 | 25,592 -  | 1 |
| GenelD:50883    | Chek2        | 5 | 110,840,017 | 110,874,133 | 34,116 +  | 1 |
| GenelD:209683   | Ttc28        | 5 | 110,879,803 | 111,289,780 | 409,977 + | 2 |
| GenelD:56305    | Pitpnb       | 5 | 111,330,763 | 111,388,359 | 57,596 +  | 1 |
| GenelD:433938   | Mn1          | 5 | 111,418,166 | 111,457,025 | 38,859 +  | 2 |
| GenelD:12960    | Crybb1       | 5 | 112,255,821 | 112,269,582 | 13,761 +  | 1 |
| GenelD:22022    | Tpst2        | 5 | 112,276,707 | 112,315,356 | 38,649 +  | 2 |
| GenelD:54723    | Tfip11       | 5 | 112,326,369 | 112,338,073 | 11,704 +  | 1 |
| GenelD:333048   | Tmem211      | 5 | 113,226,909 | 113,239,263 | 12,354 +  | 1 |
| GenelD:14747    | Cmklr1       | 5 | 113,612,355 | 113,650,390 | 38,035 -  | 1 |
| GenelD:53890    | Sart3        | 5 | 113,742,446 | 113,771,649 | 29,203 -  | 3 |
| GenelD:10004178 | Gm3511       | 5 | 113,767,100 | 113,767,414 | 314 +     | 2 |
| GenelD:66383    | Iscu         | 5 | 113,772,812 | 113,778,282 | 5,470 +   | 2 |
| GenelD:23790    | Coro1c       | 5 | 113,842,439 | 113,908,706 | 66,267 -  | 1 |
| GenelD:100756   | Usp30        | 5 | 114,100,333 | 114,122,924 | 22,591 +  | 2 |
| GenelD:231642   | Alkbh2       | 5 | 114,123,934 | 114,128,176 | 4,242 -   | 2 |
| GenelD:22256    | Ung          | 5 | 114,130,435 | 114,139,321 | 8,886 +   | 2 |
| GenelD:330171   | Kctd10       | 5 | 114,363,572 | 114,380,505 | 16,933 -  | 2 |
| GenelD:117146   | Ube3b        | 5 | 114,380,607 | 114,421,166 | 40,559 +  | 2 |
| GenelD:77697    | Mmab         | 5 | 114,431,034 | 114,444,027 | 12,993 -  | 1 |

|                 |               |   |             |             |           |   |
|-----------------|---------------|---|-------------|-------------|-----------|---|
| GenelD:17855    | Mvk           | 5 | 114,444,306 | 114,460,591 | 16,285 +  | 1 |
| GenelD:433940   | Fam222a       | 5 | 114,568,251 | 114,613,218 | 44,967 +  | 1 |
| GenelD:26431    | Git2          | 5 | 114,727,408 | 114,773,492 | 46,084 -  | 2 |
| GenelD:67642    | 4930515G01Rik | 5 | 114,773,733 | 114,774,983 | 1,250 -   | 2 |
| GenelD:68420    | Ankrd13a      | 5 | 114,775,140 | 114,805,821 | 30,681 +  | 3 |
| GenelD:10050273 | Gm19344       | 5 | 114,780,594 | 114,784,570 | 3,976 +   | 2 |
| GenelD:66236    | 1500011B03Rik | 5 | 114,808,196 | 114,813,976 | 5,780 -   | 2 |
| GenelD:330173   | 2610524H06Rik | 5 | 114,821,937 | 114,823,468 | 1,531 -   | 2 |
| GenelD:74585    | Sppl3         | 5 | 115,011,524 | 115,098,790 | 87,266 +  | 2 |
| GenelD:11409    | Acads         | 5 | 115,110,299 | 115,119,313 | 9,014 -   | 1 |
| GenelD:106840   | Unc119b       | 5 | 115,122,566 | 115,134,975 | 12,409 -  | 2 |
| GenelD:109154   | Mlec          | 5 | 115,142,981 | 115,158,176 | 15,195 -  | 2 |
| GenelD:29867    | Cabp1         | 5 | 115,168,691 | 115,186,121 | 17,430 -  | 1 |
| GenelD:117109   | Pop5          | 5 | 115,235,851 | 115,240,972 | 5,121 +   | 2 |
| GenelD:50849    | Rnf10         | 5 | 115,241,770 | 115,272,895 | 31,125 -  | 3 |
| GenelD:52064    | Coq5          | 5 | 115,279,702 | 115,296,972 | 17,270 +  | 2 |
| GenelD:56455    | Dynll1        | 5 | 115,297,110 | 115,300,990 | 3,880 -   | 1 |
| GenelD:108014   | Srsf9         | 5 | 115,327,177 | 115,333,080 | 5,903 +   | 2 |
| GenelD:384281   | Gatc          | 5 | 115,333,242 | 115,341,161 | 7,919 -   | 3 |
| GenelD:69076    | Triap1        | 5 | 115,341,247 | 115,343,552 | 2,305 +   | 2 |
| GenelD:12861    | Cox6a1        | 5 | 115,345,654 | 115,348,955 | 3,301 -   | 2 |
| GenelD:17690    | Msi1          | 5 | 115,429,685 | 115,454,202 | 24,517 +  | 1 |
| GenelD:78154    | 4930430O22Rik | 5 | 115,436,070 | 115,436,638 | 568 -     | 1 |
| GenelD:19303    | Pxn           | 5 | 115,506,702 | 115,555,986 | 49,284 +  | 3 |
| GenelD:11837    | Rplp0         | 5 | 115,559,467 | 115,563,729 | 4,262 +   | 2 |
| GenelD:231659   | Gcn11l        | 5 | 115,565,263 | 115,622,654 | 57,391 +  | 2 |
| GenelD:66123    | 1110006O24Rik | 5 | 115,631,049 | 115,631,816 | 767 -     | 1 |
| GenelD:77407    | Rab35         | 5 | 115,631,987 | 115,647,158 | 15,171 +  | 1 |
| GenelD:19079    | Prkab1        | 5 | 116,013,590 | 116,024,428 | 10,838 -  | 1 |
| GenelD:10050293 | Gm13842       | 5 | 116,026,411 | 116,029,230 | 2,819 -   | 1 |
| GenelD:71954    | Suds3         | 5 | 117,091,680 | 117,115,993 | 24,313 -  | 2 |
| GenelD:330177   | Taok3         | 5 | 117,120,129 | 117,275,101 | 154,972 + | 3 |
| GenelD:10003935 | Gm10399       | 5 | 117,318,497 | 117,319,238 | 741 -     | 1 |
| GenelD:231668   | Vsig10        | 5 | 117,319,266 | 117,355,006 | 35,740 +  | 2 |
| GenelD:59043    | Wsb2          | 5 | 117,357,305 | 117,378,589 | 21,284 +  | 2 |
| GenelD:72151    | Rfc5          | 5 | 117,379,145 | 117,389,023 | 9,878 -   | 1 |
| GenelD:231670   | Fbxo21        | 5 | 117,976,770 | 118,010,191 | 33,421 +  | 1 |
| GenelD:57816    | Tesc          | 5 | 118,027,824 | 118,061,870 | 34,046 +  | 1 |
| GenelD:231672   | Fbxw8         | 5 | 118,064,981 | 118,155,458 | 90,477 -  | 1 |
| GenelD:76199    | Med13l        | 5 | 118,560,719 | 118,765,438 | 204,719 + | 1 |
| GenelD:21386    | Tbx3          | 5 | 119,670,669 | 119,684,601 | 13,932 +  | 1 |
| GenelD:71772    | Plbd2         | 5 | 120,483,893 | 120,503,623 | 19,730 -  | 1 |
| GenelD:170756   | Slc24a6       | 5 | 120,511,192 | 120,534,024 | 22,832 +  | 1 |
| GenelD:252972   | Tpcn1         | 5 | 120,534,157 | 120,588,613 | 54,456 -  | 1 |
| GenelD:75732    | lqcd          | 5 | 120,589,023 | 120,607,113 | 18,090 +  | 1 |
| GenelD:14357    | Dtx1          | 5 | 120,680,264 | 120,711,669 | 31,405 -  | 2 |
| GenelD:19247    | Ptpn11        | 5 | 121,130,533 | 121,191,397 | 60,864 -  | 1 |

|                 |               |   |             |             |           |   |
|-----------------|---------------|---|-------------|-------------|-----------|---|
| GenelD:19988    | Rpl6          | 5 | 121,204,501 | 121,209,241 | 4,740 +   | 1 |
| GenelD:269700   | Gm15800       | 5 | 121,220,219 | 121,368,577 | 148,358 + | 1 |
| GenelD:231713   | Naa25         | 5 | 121,397,982 | 121,440,113 | 42,131 +  | 1 |
| GenelD:67397    | Erp29         | 5 | 121,444,753 | 121,452,474 | 7,721 -   | 1 |
| GenelD:77462    | Tmem116       | 5 | 121,452,709 | 121,495,421 | 42,712 +  | 1 |
| GenelD:17165    | Mapkapk5      | 5 | 121,525,051 | 121,545,892 | 20,841 -  | 1 |
| GenelD:11669    | Aldh2         | 5 | 121,567,687 | 121,593,824 | 26,137 -  | 1 |
| GenelD:338350   | Acad12        | 5 | 121,598,281 | 121,618,938 | 20,657 -  | 1 |
| GenelD:71985    | Acad10        | 5 | 121,621,029 | 121,660,510 | 39,481 -  | 1 |
| GenelD:72399    | Brap          | 5 | 121,660,586 | 121,687,248 | 26,662 +  | 1 |
| GenelD:20239    | Atxn2         | 5 | 121,711,609 | 121,814,950 | 103,341 + | 1 |
| GenelD:16923    | Sh2b3         | 5 | 121,817,215 | 121,836,801 | 19,586 -  | 3 |
| GenelD:231717   | Fam109a       | 5 | 121,849,028 | 121,854,599 | 5,571 +   | 1 |
| GenelD:13048    | Cux2          | 5 | 121,860,216 | 122,047,825 | 187,609 - | 2 |
| GenelD:19047    | Ppp1cc        | 5 | 122,158,279 | 122,175,269 | 16,990 +  | 1 |
| GenelD:654470   | Tctn1         | 5 | 122,241,515 | 122,264,460 | 22,945 -  | 1 |
| GenelD:320717   | Pptc7         | 5 | 122,284,398 | 122,324,281 | 39,883 +  | 2 |
| GenelD:231724   | Rad9b         | 5 | 122,325,508 | 122,354,195 | 28,687 -  | 1 |
| GenelD:56433    | Vps29         | 5 | 122,354,413 | 122,363,287 | 8,874 +   | 2 |
| GenelD:68948    | Fam216a       | 5 | 122,364,584 | 122,371,963 | 7,379 -   | 2 |
| GenelD:68080    | Gpn3          | 5 | 122,372,508 | 122,382,771 | 10,263 +  | 2 |
| GenelD:56378    | Arpc3         | 5 | 122,391,928 | 122,406,178 | 14,250 +  | 1 |
| GenelD:56317    | Anapc7        | 5 | 122,422,444 | 122,444,912 | 22,468 +  | 1 |
| GenelD:11938    | Atp2a2        | 5 | 122,453,513 | 122,502,225 | 48,712 -  | 1 |
| GenelD:207565   | Camkk2        | 5 | 122,731,170 | 122,779,410 | 48,240 -  | 1 |
| GenelD:59008    | Anapc5        | 5 | 122,787,459 | 122,821,339 | 33,880 -  | 2 |
| GenelD:80751    | Rnf34         | 5 | 122,850,188 | 122,868,945 | 18,757 +  | 1 |
| GenelD:30841    | Kdm2b         | 5 | 122,870,668 | 122,989,092 | 118,424 - | 2 |
| GenelD:109202   | A930024E05Rik | 5 | 122,989,354 | 122,998,345 | 8,991 +   | 1 |
| GenelD:10003989 | Gm2479        | 5 | 123,007,299 | 123,012,872 | 5,573 -   | 1 |
| GenelD:109305   | Orai1         | 5 | 123,015,074 | 123,030,452 | 15,378 +  | 1 |
| GenelD:330189   | Tmem120b      | 5 | 123,076,275 | 123,117,445 | 41,170 +  | 1 |
| GenelD:23912    | Rhof          | 5 | 123,118,180 | 123,132,629 | 14,449 -  | 3 |
| GenelD:74366    | 4932422M17Rik | 5 | 123,138,252 | 123,141,563 | 3,311 +   | 4 |
| GenelD:208043   | Setd1b        | 5 | 123,142,193 | 123,168,630 | 26,437 +  | 4 |
| GenelD:67151    | Psmd9         | 5 | 123,228,190 | 123,250,126 | 21,936 +  | 1 |
| GenelD:77045    | Bcl7a         | 5 | 123,344,448 | 123,374,083 | 29,635 +  | 1 |
| GenelD:66593    | Diablo        | 5 | 123,511,330 | 123,524,164 | 12,834 -  | 1 |
| GenelD:77573    | Vps33a        | 5 | 123,528,757 | 123,573,015 | 44,258 -  | 1 |
| GenelD:56430    | Clip1         | 5 | 123,579,070 | 123,684,291 | 105,221 - | 1 |
| GenelD:208606   | Rsrc2         | 5 | 123,728,430 | 123,749,412 | 20,982 -  | 1 |
| GenelD:208628   | Kntc1         | 5 | 123,749,726 | 123,821,593 | 71,867 +  | 1 |
| GenelD:68184    | Denr          | 5 | 123,907,275 | 123,928,832 | 21,557 +  | 1 |
| GenelD:330192   | Vps37b        | 5 | 124,004,641 | 124,032,260 | 27,619 -  | 1 |
| GenelD:66627    | Ogfod2        | 5 | 124,112,338 | 124,115,476 | 3,138 +   | 2 |
| GenelD:65105    | Arl6ip4       | 5 | 124,116,108 | 124,118,195 | 2,087 +   | 2 |
| GenelD:19679    | Pitpnm2       | 5 | 124,118,690 | 124,216,418 | 97,728 -  | 2 |

|                 |               |   |             |             |             |   |
|-----------------|---------------|---|-------------|-------------|-------------|---|
| GenelD:269702   | Mphosph9      | 5 | 124,250,959 | 124,328,451 | 77,492 -    | 1 |
| GenelD:13445    | Cdk2ap1       | 5 | 124,345,439 | 124,354,628 | 9,189 -     | 2 |
| GenelD:243272   | Sbno1         | 5 | 124,368,702 | 124,425,914 | 57,212 -    | 1 |
| GenelD:75695    | Rilpl1        | 5 | 124,493,080 | 124,531,391 | 38,311 -    | 2 |
| GenelD:56334    | Tmed2         | 5 | 124,540,791 | 124,550,503 | 9,712 +     | 3 |
| GenelD:67848    | Ddx55         | 5 | 124,552,864 | 124,569,660 | 16,796 +    | 1 |
| GenelD:67978    | Tctn2         | 5 | 124,598,749 | 124,627,738 | 28,989 +    | 1 |
| GenelD:21871    | Atp6v0a2      | 5 | 124,629,067 | 124,646,816 | 17,749 +    | 1 |
| GenelD:215707   | Ccdc92        | 5 | 124,834,432 | 124,862,221 | 27,789 -    | 1 |
| GenelD:269704   | Zfp664        | 5 | 124,862,705 | 124,888,630 | 25,925 +    | 1 |
| GenelD:20602    | Ncor2         | 5 | 125,017,153 | 125,179,214 | 162,061 -   | 5 |
| GenelD:20778    | Scarb1        | 5 | 125,277,087 | 125,341,094 | 64,007 -    | 1 |
| GenelD:22190    | Ubc           | 5 | 125,385,965 | 125,390,017 | 4,052 -     | 1 |
| GenelD:208213   | Tmem132c      | 5 | 127,241,826 | 127,565,790 | 323,964 +   | 1 |
| GenelD:100561   | Slc15a4       | 5 | 127,595,666 | 127,617,392 | 21,726 -    | 1 |
| GenelD:19384    | Ran           | 5 | 129,020,156 | 129,024,321 | 4,165 +     | 1 |
| GenelD:231769   | Sfswap        | 5 | 129,501,231 | 129,571,384 | 70,153 +    | 1 |
| GenelD:23948    | Mmp17         | 5 | 129,584,214 | 129,608,211 | 23,997 +    | 1 |
| GenelD:74222    | Sept14        | 5 | 129,683,391 | 129,708,511 | 25,120 -    | 1 |
| GenelD:66258    | Mrps17        | 5 | 129,715,528 | 129,718,691 | 3,163 +     | 1 |
| GenelD:14467    | Gbas          | 5 | 129,725,075 | 129,758,325 | 33,250 +    | 1 |
| GenelD:100678   | Psph          | 5 | 129,765,558 | 129,787,253 | 21,695 -    | 1 |
| GenelD:12466    | Cct6a         | 5 | 129,787,385 | 129,794,500 | 7,115 +     | 1 |
| GenelD:10011336 | Snora15       | 5 | 129,794,561 | 129,794,676 | 115 +       | 1 |
| GenelD:18682    | Phkg1         | 5 | 129,863,435 | 129,879,083 | 15,648 -    | 1 |
| GenelD:14004    | Chchd2        | 5 | 129,881,161 | 129,887,470 | 6,309 -     | 1 |
| GenelD:71970    | 2410018M08Rik | 5 | 129,895,723 | 129,903,623 | 7,900 +     | 1 |
| GenelD:56715    | Rabgef1       | 5 | 130,171,819 | 130,214,337 | 42,518 +    | 1 |
| GenelD:71667    | Tmem248       | 5 | 130,219,744 | 130,243,765 | 24,021 +    | 1 |
| GenelD:66711    | Sbds          | 5 | 130,245,732 | 130,255,462 | 9,730 -     | 1 |
| GenelD:100929   | Tyw1          | 5 | 130,255,619 | 130,341,567 | 85,948 +    | 1 |
| GenelD:319974   | Auts2         | 5 | 131,437,682 | 132,542,343 | 1,104,661 - | 3 |
| GenelD:80909    | Gatsl2        | 5 | 134,099,748 | 134,141,782 | 42,034 +    | 1 |
| GenelD:94254    | Wbscr16       | 5 | 134,148,058 | 134,176,767 | 28,709 -    | 1 |
| GenelD:114674   | Gtf2ird2      | 5 | 134,184,038 | 134,218,143 | 34,105 +    | 1 |
| GenelD:14886    | Gtf2i         | 5 | 134,237,834 | 134,314,746 | 76,912 -    | 1 |
| GenelD:269713   | Clip2         | 5 | 134,489,386 | 134,552,434 | 63,048 -    | 1 |
| GenelD:214292   | Syna          | 5 | 134,557,254 | 134,560,171 | 2,917 -     | 1 |
| GenelD:22384    | Eif4h         | 5 | 134,619,876 | 134,639,328 | 19,452 -    | 1 |
| GenelD:16885    | Limk1         | 5 | 134,656,039 | 134,688,590 | 32,551 -    | 1 |
| GenelD:10003850 | Gm10369       | 5 | 134,676,490 | 134,680,145 | 3,655 +     | 1 |
| GenelD:20907    | Stx1a         | 5 | 135,023,572 | 135,051,099 | 27,527 +    | 1 |
| GenelD:66138    | Wbscr22       | 5 | 135,052,957 | 135,064,666 | 11,709 -    | 1 |
| GenelD:66114    | Dnajc30       | 5 | 135,064,206 | 135,065,365 | 1,159 +     | 1 |
| GenelD:194309   | Vps37d        | 5 | 135,072,900 | 135,078,266 | 5,366 -     | 1 |
| GenelD:58805    | Mlxipl        | 5 | 135,106,891 | 135,138,382 | 31,491 +    | 1 |
| GenelD:27368    | Tbl2          | 5 | 135,149,711 | 135,162,662 | 12,951 +    | 2 |

|                 |               |   |             |             |           |   |
|-----------------|---------------|---|-------------|-------------|-----------|---|
| GenelD:12054    | Bcl7b         | 5 | 135,168,372 | 135,181,852 | 13,480 +  | 2 |
| GenelD:22385    | Baz1b         | 5 | 135,187,323 | 135,246,129 | 58,806 +  | 2 |
| GenelD:14371    | Fzd9          | 5 | 135,248,938 | 135,251,047 | 2,109 -   | 1 |
| GenelD:107939   | Pom121        | 5 | 135,376,140 | 135,394,546 | 18,406 -  | 1 |
| GenelD:215114   | Hip1          | 5 | 135,406,518 | 135,545,122 | 138,604 - | 1 |
| GenelD:18984    | Por           | 5 | 135,689,214 | 135,735,325 | 46,111 +  | 1 |
| GenelD:215210   | Tmem120a      | 5 | 135,735,490 | 135,744,172 | 8,682 -   | 1 |
| GenelD:76571    | Styx1         | 5 | 135,747,220 | 135,778,385 | 31,165 -  | 2 |
| GenelD:17448    | Mdh2          | 5 | 135,778,649 | 135,790,386 | 11,737 +  | 1 |
| GenelD:22628    | Ywhag         | 5 | 135,908,379 | 135,934,641 | 26,262 -  | 1 |
| GenelD:23921    | Sh2b2         | 5 | 136,218,149 | 136,244,903 | 26,754 -  | 2 |
| GenelD:13047    | Cux1          | 5 | 136,248,135 | 136,567,431 | 319,296 - | 2 |
| GenelD:140709   | Col26a1       | 5 | 136,741,764 | 136,883,107 | 141,343 - | 1 |
| GenelD:67286    | Rab15         | 5 | 136,908,150 | 136,913,244 | 5,094 +   | 1 |
| GenelD:70103    | Znhit1        | 5 | 136,982,201 | 136,987,882 | 5,681 -   | 1 |
| GenelD:26433    | Plod3         | 5 | 136,987,019 | 136,996,646 | 9,627 +   | 1 |
| GenelD:735283   | Mir702        | 5 | 136,991,433 | 136,991,541 | 108 +     | 1 |
| GenelD:381677   | Vgf           | 5 | 137,030,295 | 137,033,351 | 3,056 +   | 1 |
| GenelD:11769    | Ap1s1         | 5 | 137,034,994 | 137,046,060 | 11,066 -  | 1 |
| GenelD:11423    | Ache          | 5 | 137,288,277 | 137,294,463 | 6,186 +   | 1 |
| GenelD:70240    | Ufsp1         | 5 | 137,294,669 | 137,295,664 | 995 +     | 1 |
| GenelD:83701    | Srrt          | 5 | 137,295,704 | 137,307,674 | 11,970 -  | 3 |
| GenelD:22051    | Trip6         | 5 | 137,309,899 | 137,314,241 | 4,342 -   | 2 |
| GenelD:83704    | Slc12a9       | 5 | 137,314,558 | 137,333,582 | 19,024 -  | 3 |
| GenelD:13846    | Ephb4         | 5 | 137,350,109 | 137,374,522 | 24,413 +  | 1 |
| GenelD:74097    | Pop7          | 5 | 137,501,439 | 137,502,429 | 990 -     | 1 |
| GenelD:57330    | Gigyf1        | 5 | 137,518,880 | 137,527,935 | 9,055 +   | 4 |
| GenelD:14693    | Gnb2          | 5 | 137,528,129 | 137,533,229 | 5,100 -   | 3 |
| GenelD:71176    | Fbxo24        | 5 | 137,612,505 | 137,625,078 | 12,573 -  | 1 |
| GenelD:231798   | Lrch4         | 5 | 137,629,123 | 137,641,099 | 11,976 +  | 1 |
| GenelD:10031690 | Gm20605       | 5 | 137,629,123 | 137,642,896 | 13,773 +  | 1 |
| GenelD:243300   | Nyap1         | 5 | 137,730,948 | 137,739,998 | 9,050 -   | 2 |
| GenelD:78829    | Tsc22d4       | 5 | 137,745,969 | 137,768,453 | 22,484 +  | 2 |
| GenelD:69871    | Ppp1r35       | 5 | 137,778,918 | 137,780,107 | 1,189 +   | 2 |
| GenelD:231803   | Mepce         | 5 | 137,781,906 | 137,786,701 | 4,795 -   | 2 |
| GenelD:381678   | Zcwpw1        | 5 | 137,787,802 | 137,822,621 | 34,819 +  | 2 |
| GenelD:74570    | Zkscan1       | 5 | 138,085,084 | 138,107,822 | 22,738 +  | 1 |
| GenelD:26893    | Cops6         | 5 | 138,161,102 | 138,163,984 | 2,882 +   | 1 |
| GenelD:17220    | Mcm7          | 5 | 138,164,589 | 138,171,862 | 7,273 -   | 1 |
| GenelD:723926   | Mir25         | 5 | 138,165,321 | 138,165,404 | 83 -      | 1 |
| GenelD:723885   | Mir93         | 5 | 138,165,523 | 138,165,610 | 87 -      | 1 |
| GenelD:723925   | Mir106b       | 5 | 138,165,737 | 138,165,818 | 81 -      | 1 |
| GenelD:11781    | Ap4m1         | 5 | 138,172,021 | 138,178,687 | 6,666 +   | 1 |
| GenelD:21343    | Taf6          | 5 | 138,178,617 | 138,187,186 | 8,569 -   | 1 |
| GenelD:66096    | Lamtor4       | 5 | 138,255,482 | 138,259,395 | 3,913 +   | 1 |
| GenelD:231807   | BC037034      | 5 | 138,259,658 | 138,264,052 | 4,394 -   | 1 |
| GenelD:69004    | 6330418K02Rik | 5 | 138,264,045 | 138,266,661 | 2,616 +   | 1 |

|               |               |   |             |             |           |   |
|---------------|---------------|---|-------------|-------------|-----------|---|
| GenelD:330217 | Gal3st4       | 5 | 138,264,925 | 138,272,754 | 7,829 -   | 1 |
| GenelD:71951  | Gpc2          | 5 | 138,273,660 | 138,279,937 | 6,277 -   | 1 |
| GenelD:72154  | Zfp157        | 5 | 138,441,476 | 138,460,694 | 19,218 +  | 1 |
| GenelD:80752  | Fam20c        | 5 | 138,755,081 | 138,810,063 | 54,982 +  | 1 |
| GenelD:18590  | Pdgfa         | 5 | 138,976,971 | 138,994,953 | 17,982 -  | 3 |
| GenelD:433956 | Heatr2        | 5 | 139,150,223 | 139,186,505 | 36,282 +  | 1 |
| GenelD:77053  | Sun1          | 5 | 139,200,637 | 139,249,839 | 49,202 +  | 1 |
| GenelD:545817 | Cyp2w1        | 5 | 139,352,617 | 139,357,033 | 4,416 +   | 1 |
| GenelD:73212  | 3110082I17Rik | 5 | 139,359,739 | 139,460,534 | 100,795 - | 3 |
| GenelD:723898 | Mir339        | 5 | 139,369,650 | 139,369,745 | 95 -      | 1 |
| GenelD:320197 | D830046C22Rik | 5 | 139,377,697 | 139,380,053 | 2,356 +   | 2 |
| GenelD:80290  | Gpr146        | 5 | 139,380,667 | 139,396,414 | 15,747 +  | 2 |
| GenelD:100494 | Zfand2a       | 5 | 139,471,216 | 139,484,491 | 13,275 -  | 1 |
| GenelD:74973  | 4930500L23Rik | 5 | 139,523,751 | 139,541,339 | 17,588 +  | 1 |
| GenelD:22255  | Uncx          | 5 | 139,543,898 | 139,548,179 | 4,281 +   | 1 |
| GenelD:68510  | Ints1         | 5 | 139,751,282 | 139,775,678 | 24,396 -  | 1 |
| GenelD:17135  | Mafk          | 5 | 139,791,536 | 139,802,652 | 11,116 +  | 2 |
| GenelD:231832 | Tmem184a      | 5 | 139,804,952 | 139,814,283 | 9,331 -   | 1 |
| GenelD:66506  | Psmg3         | 5 | 139,823,594 | 139,826,843 | 3,249 -   | 1 |
| GenelD:243312 | Elfn1         | 5 | 139,907,943 | 139,974,725 | 66,782 +  | 1 |
| GenelD:17120  | Mad1l1        | 5 | 140,008,689 | 140,321,552 | 312,863 - | 1 |
| GenelD:68017  | Ftsj2         | 5 | 140,327,674 | 140,331,898 | 4,224 -   | 1 |
| GenelD:17766  | Nudt1         | 5 | 140,331,922 | 140,338,135 | 6,213 +   | 1 |
| GenelD:27979  | Eif3b         | 5 | 140,419,305 | 140,443,358 | 24,053 +  | 1 |
| GenelD:16848  | Lfng          | 5 | 140,607,341 | 140,615,545 | 8,204 +   | 2 |
| GenelD:791272 | Gm10091       | 5 | 140,615,695 | 140,618,343 | 2,648 +   | 2 |
| GenelD:78339  | Ttyh3         | 5 | 140,620,578 | 140,649,031 | 28,453 -  | 2 |
| GenelD:74239  | lqce          | 5 | 140,663,505 | 140,702,378 | 38,873 -  | 1 |
| GenelD:231841 | Brat1         | 5 | 140,705,023 | 140,719,334 | 14,311 +  | 1 |
| GenelD:14673  | Gna12         | 5 | 140,759,944 | 140,830,431 | 70,487 -  | 1 |
| GenelD:17425  | Foxk1         | 5 | 142,401,497 | 142,462,015 | 60,518 +  | 2 |
| GenelD:231855 | Ap5z1         | 5 | 142,463,931 | 142,478,715 | 14,784 +  | 1 |
| GenelD:231858 | Radil         | 5 | 142,484,841 | 142,551,077 | 66,236 -  | 1 |
| GenelD:231861 | Tnrc18        | 5 | 142,724,605 | 142,817,387 | 92,782 -  | 4 |
| GenelD:231863 | Fbxl18        | 5 | 142,871,789 | 142,895,238 | 23,449 -  | 2 |
| GenelD:11461  | Actb          | 5 | 142,903,116 | 142,906,724 | 3,608 -   | 2 |
| GenelD:14086  | Fscn1         | 5 | 142,960,355 | 142,973,189 | 12,834 +  | 1 |
| GenelD:231866 | Zfp12         | 5 | 143,235,208 | 143,247,970 | 12,762 +  | 1 |
| GenelD:54201  | Zfp316        | 5 | 143,249,695 | 143,270,022 | 20,327 -  | 1 |
| GenelD:330230 | Zfp853        | 5 | 143,287,594 | 143,292,404 | 4,810 -   | 1 |
| GenelD:231868 | E130309D02Rik | 5 | 143,301,072 | 143,315,360 | 14,288 -  | 1 |
| GenelD:72881  | Zdhhc4        | 5 | 143,316,489 | 143,329,238 | 12,749 -  | 2 |
| GenelD:67672  | O610040B10Rik | 5 | 143,329,308 | 143,332,704 | 3,396 +   | 1 |
| GenelD:66913  | Kdelr2        | 5 | 143,403,820 | 143,421,904 | 18,084 +  | 1 |
| GenelD:19353  | Rac1          | 5 | 143,505,481 | 143,527,993 | 22,512 -  | 1 |
| GenelD:19159  | Cyth3         | 5 | 143,622,447 | 143,710,250 | 87,803 +  | 1 |
| GenelD:231874 | Ccz1          | 5 | 143,987,909 | 144,014,853 | 26,944 -  | 1 |



|                 |               |   |             |             |           |   |
|-----------------|---------------|---|-------------|-------------|-----------|---|
| GenelD:18261    | Ocm           | 5 | 144,019,807 | 144,050,609 | 30,802 -  | 1 |
| GenelD:231876   | Lmtk2         | 5 | 144,100,436 | 144,188,204 | 87,768 +  | 1 |
| GenelD:55950    | Bri3          | 5 | 144,244,437 | 144,264,573 | 20,136 +  | 1 |
| GenelD:66898    | Baiap211      | 5 | 144,264,525 | 144,358,112 | 93,587 -  | 1 |
| GenelD:75873    | 4930568B11Rik | 5 | 144,544,888 | 144,546,036 | 1,148 -   | 1 |
| GenelD:53324    | Nptx2         | 5 | 144,545,887 | 144,557,478 | 11,591 +  | 1 |
| GenelD:243339   | Tmem130       | 5 | 144,735,915 | 144,761,578 | 25,663 -  | 1 |
| GenelD:100683   | Trrap         | 5 | 144,768,792 | 144,859,773 | 90,981 +  | 1 |
| GenelD:75788    | Smurf1        | 5 | 144,876,495 | 144,965,830 | 89,335 -  | 1 |
| GenelD:56443    | Arpc1a        | 5 | 145,083,869 | 145,108,756 | 24,887 +  | 2 |
| GenelD:11867    | Arpc1b        | 5 | 145,114,256 | 145,128,186 | 13,930 +  | 1 |
| GenelD:231887   | Pdap1         | 5 | 145,128,770 | 145,140,089 | 11,319 -  | 1 |
| GenelD:231889   | Bud31         | 5 | 145,140,397 | 145,148,074 | 7,677 +   | 1 |
| GenelD:71799    | Ptcd1         | 5 | 145,147,378 | 145,167,104 | 19,726 -  | 2 |
| GenelD:54188    | Cpsf4         | 5 | 145,167,224 | 145,182,040 | 14,816 +  | 1 |
| GenelD:22757    | Zkscan5       | 5 | 145,204,559 | 145,221,750 | 17,191 +  | 1 |
| GenelD:72611    | Zfp655        | 5 | 145,231,715 | 145,247,306 | 15,591 +  | 1 |
| GenelD:666311   | Zscan25       | 5 | 145,283,343 | 145,291,469 | 8,126 +   | 1 |
| GenelD:74132    | Rnf6          | 5 | 146,209,193 | 146,221,457 | 12,264 -  | 1 |
| GenelD:264064   | Cdk8          | 5 | 146,231,675 | 146,302,874 | 71,199 +  | 1 |
| GenelD:19933    | Rpl21         | 5 | 146,832,890 | 146,837,032 | 4,142 +   | 1 |
| GenelD:66596    | Gtf3a         | 5 | 146,948,657 | 146,955,614 | 6,957 +   | 1 |
| GenelD:76366    | Mtif3         | 5 | 146,951,573 | 146,963,797 | 12,224 -  | 1 |
| GenelD:140887   | Ln timer      | 5 | 147,016,655 | 147,076,572 | 59,917 -  | 1 |
| GenelD:20018    | Polr1d        | 5 | 147,077,541 | 147,111,359 | 33,818 +  | 1 |
| GenelD:10003980 | D5Ertd605e    | 5 | 147,418,620 | 147,423,044 | 4,424 +   | 1 |
| GenelD:72587    | Pan3          | 5 | 147,430,580 | 147,548,501 | 117,921 + | 1 |
| GenelD:14254    | Flt1          | 5 | 147,562,196 | 147,725,988 | 163,792 - | 1 |
| GenelD:66537    | Pomp          | 5 | 147,860,628 | 147,875,778 | 15,150 +  | 1 |
| GenelD:11987    | Slc7a1        | 5 | 148,327,410 | 148,399,904 | 72,494 -  | 1 |
| GenelD:231912   | Katnal1       | 5 | 148,871,584 | 148,928,647 | 57,063 -  | 1 |
| GenelD:15289    | Hmgb1         | 5 | 149,047,227 | 149,053,037 | 5,810 -   | 1 |
| GenelD:69657    | 2310047D07Rik | 5 | 149,237,154 | 149,237,987 | 833 +     | 1 |
| GenelD:15505    | Hsph1         | 5 | 149,616,845 | 149,636,315 | 19,470 -  | 1 |
| GenelD:10050399 | Gm20005       | 5 | 149,641,602 | 149,648,163 | 6,561 +   | 1 |
| GenelD:433968   | Gm5566        | 5 | 149,660,652 | 149,668,937 | 8,285 -   | 1 |
| GenelD:381694   | B3galt1       | 5 | 149,678,257 | 149,762,599 | 84,342 +  | 1 |
| GenelD:100637   | N4bp211       | 5 | 150,571,643 | 150,594,525 | 22,882 -  | 1 |
| GenelD:381695   | N4bp212       | 5 | 150,635,973 | 150,665,612 | 29,639 -  | 2 |
| GenelD:100710   | Pds5b         | 5 | 150,673,827 | 150,810,669 | 136,842 + | 2 |
| GenelD:16591    | Kl            | 5 | 150,952,607 | 150,993,817 | 41,210 +  | 1 |
| GenelD:213819   | Casd1         | 6 | 4,601,066   | 4,643,381   | 42,315 +  | 1 |
| GenelD:10004001 | Gm9835        | 6 | 4,893,352   | 4,903,214   | 9,862 -   | 1 |
| GenelD:243725   | Ppp1r9a       | 6 | 4,903,320   | 5,165,661   | 262,341 + | 1 |
| GenelD:50799    | Slc25a13      | 6 | 6,041,218   | 6,217,173   | 175,955 - | 1 |
| GenelD:10105613 | LOC101056138  | 6 | 6,222,535   | 6,280,821   | 58,286 +  | 1 |
| GenelD:13395    | Dlx5          | 6 | 6,877,805   | 6,882,068   | 4,263 -   | 1 |

|                 |          |   |            |            |           |   |
|-----------------|----------|---|------------|------------|-----------|---|
| GenelD:252875   | Mios     | 6 | 8,209,227  | 8,236,274  | 27,047 +  | 1 |
| GenelD:75725    | Phf14    | 6 | 11,925,881 | 12,081,198 | 155,317 + | 1 |
| GenelD:71900    | Tmem106b | 6 | 13,069,759 | 13,089,269 | 19,510 +  | 1 |
| GenelD:101118   | Tmem168  | 6 | 13,580,689 | 13,608,063 | 27,374 -  | 1 |
| GenelD:64450    | Gpr85    | 6 | 13,835,071 | 13,839,848 | 4,777 -   | 1 |
| GenelD:114142   | Foxp2    | 6 | 14,901,349 | 15,441,977 | 540,628 + | 1 |
| GenelD:16543    | Mdfic    | 6 | 15,720,661 | 15,802,169 | 81,508 +  | 1 |
| GenelD:10050430 | Gm15473  | 6 | 17,058,803 | 17,064,996 | 6,193 -   | 1 |
| GenelD:21753    | Tes      | 6 | 17,065,149 | 17,105,825 | 40,676 +  | 1 |
| GenelD:30785    | Cttnbp2  | 6 | 18,366,477 | 18,514,825 | 148,348 - | 1 |
| GenelD:16508    | Kcnd2    | 6 | 21,216,109 | 21,729,805 | 513,696 + | 1 |
| GenelD:73178    | Wasl     | 6 | 24,613,810 | 24,664,995 | 51,185 -  | 1 |
| GenelD:319832   | Tmem229a | 6 | 24,951,141 | 24,956,125 | 4,984 -   | 1 |
| GenelD:14763    | Gpr37    | 6 | 25,668,523 | 25,689,980 | 21,457 -  | 1 |
| GenelD:627049   | Zfp800   | 6 | 28,239,931 | 28,261,601 | 21,670 -  | 1 |
| GenelD:56463    | Snd1     | 6 | 28,480,348 | 28,888,832 | 408,484 + | 2 |
| GenelD:192198   | Lrrc4    | 6 | 28,828,126 | 28,831,747 | 3,621 -   | 2 |
| GenelD:68272    | Rbm28    | 6 | 29,123,573 | 29,164,724 | 41,151 -  | 1 |
| GenelD:101359   | Prrt4    | 6 | 29,169,230 | 29,179,584 | 10,354 -  | 1 |
| GenelD:232664   | Ccdc136  | 6 | 29,398,926 | 29,426,995 | 28,069 +  | 1 |
| GenelD:68794    | Flnc     | 6 | 29,433,153 | 29,461,888 | 28,735 +  | 1 |
| GenelD:27056    | Irf5     | 6 | 29,526,625 | 29,537,320 | 10,695 +  | 1 |
| GenelD:319757   | Smo      | 6 | 29,735,497 | 29,761,366 | 25,869 +  | 2 |
| GenelD:74340    | Ahcyl2   | 6 | 29,768,443 | 29,912,310 | 143,867 + | 1 |
| GenelD:18181    | Nrf1     | 6 | 30,047,988 | 30,153,458 | 105,470 + | 1 |
| GenelD:22214    | Ube2h    | 6 | 30,211,289 | 30,304,539 | 93,250 -  | 1 |
| GenelD:17294    | Mest     | 6 | 30,733,506 | 30,748,466 | 14,960 +  | 1 |
| GenelD:723930   | Mir335   | 6 | 30,741,299 | 30,741,396 | 97 +      | 1 |
| GenelD:54160    | Copg2    | 6 | 30,748,411 | 30,750,638 | 2,227 -   | 1 |
| GenelD:619665   | Klf14    | 6 | 30,956,021 | 30,958,990 | 2,969 -   | 1 |
| GenelD:10050386 | Gm13845  | 6 | 31,366,885 | 31,398,773 | 31,888 -  | 1 |
| GenelD:27418    | Mkln1    | 6 | 31,398,828 | 31,509,482 | 110,654 + | 1 |
| GenelD:27205    | Podxl    | 6 | 31,519,493 | 31,563,937 | 44,444 -  | 1 |
| GenelD:58246    | Slc35b4  | 6 | 34,155,879 | 34,177,054 | 21,175 -  | 1 |
| GenelD:11677    | Akr1b3   | 6 | 34,303,930 | 34,317,489 | 13,559 -  | 1 |
| GenelD:109624   | Cald1    | 6 | 34,709,444 | 34,775,469 | 66,025 +  | 1 |
| GenelD:76223    | Agbl3    | 6 | 34,780,432 | 34,857,932 | 77,500 +  | 1 |
| GenelD:70699    | Nup205   | 6 | 35,177,616 | 35,247,599 | 69,983 +  | 1 |
| GenelD:14489    | Mtpn     | 6 | 35,508,824 | 35,539,888 | 31,064 -  | 1 |
| GenelD:208647   | Creb3l2  | 6 | 37,331,021 | 37,442,148 | 111,127 - | 1 |
| GenelD:21848    | Trim24   | 6 | 37,870,811 | 37,966,292 | 95,481 +  | 1 |
| GenelD:209032   | Zc3hav1l | 6 | 38,287,394 | 38,299,259 | 11,865 -  | 1 |
| GenelD:78781    | Zc3hav1  | 6 | 38,310,497 | 38,354,603 | 44,106 -  | 1 |
| GenelD:264134   | Ttc26    | 6 | 38,381,524 | 38,427,647 | 46,123 +  | 1 |
| GenelD:320538   | Ubn2     | 6 | 38,433,925 | 38,512,763 | 78,838 +  | 1 |
| GenelD:74253    | Klrg2    | 6 | 38,626,660 | 38,637,239 | 10,579 -  | 1 |
| GenelD:15258    | Hipk2    | 6 | 38,697,840 | 38,876,190 | 178,350 - | 2 |

|                 |               |   |            |            |           |   |
|-----------------|---------------|---|------------|------------|-----------|---|
| GenelD:243771   | Parp12        | 6 | 39,086,412 | 39,118,349 | 31,937 -  | 1 |
| GenelD:75379    | 4930599N23Rik | 6 | 39,118,473 | 39,148,312 | 29,839 +  | 1 |
| GenelD:338523   | Jhdm1d        | 6 | 39,136,620 | 39,206,773 | 70,153 -  | 1 |
| GenelD:72144    | Slc37a3       | 6 | 39,334,770 | 39,377,707 | 42,937 -  | 1 |
| GenelD:19331    | Rab19         | 6 | 39,381,428 | 39,390,380 | 8,952 +   | 1 |
| GenelD:54484    | Mkrn1         | 6 | 39,397,821 | 39,420,369 | 22,548 -  | 1 |
| GenelD:209773   | Dennd2a       | 6 | 39,462,378 | 39,557,834 | 95,456 -  | 1 |
| GenelD:109880   | Braf          | 6 | 39,603,237 | 39,725,463 | 122,226 - | 1 |
| GenelD:22793    | Zyx           | 6 | 42,349,828 | 42,358,395 | 8,567 +   | 1 |
| GenelD:13835    | Epha1         | 6 | 42,358,487 | 42,373,268 | 14,781 -  | 1 |
| GenelD:320946   | A930035D04Rik | 6 | 47,452,390 | 47,460,855 | 8,465 -   | 1 |
| GenelD:26965    | Cul1          | 6 | 47,454,324 | 47,526,139 | 71,815 +  | 1 |
| GenelD:14056    | Ezh2          | 6 | 47,530,274 | 47,595,030 | 64,756 -  | 1 |
| GenelD:330301   | Zfp786        | 6 | 47,819,266 | 47,830,505 | 11,239 -  | 1 |
| GenelD:272347   | Zfp398        | 6 | 47,835,661 | 47,868,257 | 32,596 +  | 1 |
| GenelD:101095   | Zfp282        | 6 | 47,877,555 | 47,908,485 | 30,930 +  | 1 |
| GenelD:232784   | Zfp212        | 6 | 47,920,568 | 47,932,639 | 12,071 +  | 1 |
| GenelD:232785   | Zfp783        | 6 | 47,943,175 | 47,954,549 | 11,374 +  | 1 |
| GenelD:101197   | Zfp956        | 6 | 47,953,390 | 47,965,300 | 11,910 +  | 1 |
| GenelD:72306    | Zfp777        | 6 | 48,024,188 | 48,048,114 | 23,926 -  | 2 |
| GenelD:68910    | Zfp467        | 6 | 48,427,692 | 48,445,825 | 18,133 -  | 2 |
| GenelD:243369   | Sspo          | 6 | 48,448,229 | 48,501,250 | 53,021 +  | 2 |
| GenelD:330305   | Gm5111        | 6 | 48,589,445 | 48,590,584 | 1,139 +   | 2 |
| GenelD:58887    | Repin1        | 6 | 48,593,883 | 48,599,082 | 5,199 +   | 3 |
| GenelD:75593    | Malsu1        | 6 | 49,073,795 | 49,084,717 | 10,922 +  | 1 |
| GenelD:140488   | Igf2bp3       | 6 | 49,085,218 | 49,214,954 | 129,736 - | 3 |
| GenelD:101214   | Tra2a         | 6 | 49,243,921 | 49,264,052 | 20,131 -  | 1 |
| GenelD:71720    | Osbp13        | 6 | 50,293,327 | 50,456,170 | 162,843 - | 1 |
| GenelD:73183    | 5430402O13Rik | 6 | 50,566,643 | 50,594,865 | 28,222 +  | 1 |
| GenelD:70821    | 4921507P07Rik | 6 | 50,573,304 | 50,596,590 | 23,286 -  | 1 |
| GenelD:387166   | Mir148a       | 6 | 51,269,812 | 51,269,910 | 98 -      | 1 |
| GenelD:18025    | Nfe2l3        | 6 | 51,432,670 | 51,458,768 | 26,098 +  | 1 |
| GenelD:15394    | Hoxa1         | 6 | 52,155,367 | 52,158,317 | 2,950 -   | 1 |
| GenelD:10050406 | Gm15051       | 6 | 52,158,524 | 52,162,289 | 3,765 +   | 1 |
| GenelD:15399    | Hoxa2         | 6 | 52,162,511 | 52,164,831 | 2,320 -   | 1 |
| GenelD:10050396 | LOC100503966  | 6 | 52,165,674 | 52,169,576 | 3,902 +   | 1 |
| GenelD:15400    | Hoxa3         | 6 | 52,169,062 | 52,213,067 | 44,005 -  | 2 |
| GenelD:72628    | 2700086A05Rik | 6 | 52,201,124 | 52,213,597 | 12,473 +  | 2 |
| GenelD:15402    | Hoxa5         | 6 | 52,201,754 | 52,204,587 | 2,833 -   | 1 |
| GenelD:15403    | Hoxa6         | 6 | 52,206,365 | 52,208,624 | 2,259 -   | 1 |
| GenelD:10073624 | Mira          | 6 | 52,214,491 | 52,215,288 | 797 -     | 2 |
| GenelD:15404    | Hoxa7         | 6 | 52,215,623 | 52,218,573 | 2,950 -   | 2 |
| GenelD:15405    | Hoxa9         | 6 | 52,224,054 | 52,227,370 | 3,316 -   | 3 |
| GenelD:723820   | Mir196b       | 6 | 52,230,081 | 52,230,165 | 84 -      | 3 |
| GenelD:15395    | Hoxa10        | 6 | 52,231,197 | 52,240,854 | 9,657 -   | 3 |
| GenelD:15396    | Hoxa11        | 6 | 52,242,106 | 52,245,767 | 3,661 -   | 1 |
| GenelD:58875    | Hibadh        | 6 | 52,546,230 | 52,640,300 | 94,070 -  | 1 |

|                 |               |   |            |            |           |   |
|-----------------|---------------|---|------------|------------|-----------|---|
| GenelD:52440    | Tax1bp1       | 6 | 52,713,729 | 52,766,780 | 53,051 +  | 1 |
| GenelD:66873    | Tril          | 6 | 53,815,468 | 53,820,825 | 5,357 -   | 1 |
| GenelD:69993    | Chn2          | 6 | 54,039,932 | 54,301,812 | 261,880 + | 1 |
| GenelD:10004205 | 9130019P16Rik | 6 | 54,269,681 | 54,430,221 | 160,540 - | 1 |
| GenelD:69938    | Scrn1         | 6 | 54,508,816 | 54,566,382 | 57,566 -  | 1 |
| GenelD:231997   | Fkbp14        | 6 | 54,577,605 | 54,593,128 | 15,523 -  | 1 |
| GenelD:231999   | Plekha8       | 6 | 54,595,111 | 54,645,823 | 50,712 +  | 1 |
| GenelD:107607   | Nod1          | 6 | 54,923,942 | 54,972,612 | 48,670 -  | 1 |
| GenelD:353172   | Gars          | 6 | 55,038,001 | 55,079,504 | 41,503 +  | 1 |
| GenelD:11517    | Adcyap1r1     | 6 | 55,451,980 | 55,501,455 | 49,475 +  | 1 |
| GenelD:78937    | Avl9          | 6 | 56,714,905 | 56,761,911 | 47,006 +  | 1 |
| GenelD:107569   | Nt5c3         | 6 | 56,882,400 | 56,923,932 | 41,532 -  | 1 |
| GenelD:73998    | Herc3         | 6 | 58,833,700 | 58,920,398 | 86,698 +  | 1 |
| GenelD:13990    | Smarcad1      | 6 | 65,042,667 | 65,116,049 | 73,382 +  | 1 |
| GenelD:68169    | Ndnf          | 6 | 65,671,611 | 65,706,930 | 35,319 +  | 1 |
| GenelD:75373    | 4930597O21Rik | 6 | 66,894,644 | 66,921,502 | 26,858 -  | 1 |
| GenelD:14701    | Gng12         | 6 | 66,896,397 | 67,021,361 | 124,964 + | 1 |
| GenelD:13197    | Gadd45a       | 6 | 67,035,096 | 67,037,407 | 2,311 -   | 1 |
| GenelD:320172   | E230016M11Rik | 6 | 67,036,599 | 67,080,652 | 44,053 +  | 1 |
| GenelD:66870    | Serbp1        | 6 | 67,266,979 | 67,289,302 | 22,323 +  | 1 |
| GenelD:68477    | Rmnd5a        | 6 | 71,388,634 | 71,440,637 | 52,003 -  | 1 |
| GenelD:22644    | Rnf103        | 6 | 71,493,894 | 71,510,881 | 16,987 +  | 1 |
| GenelD:66700    | Chmp3         | 6 | 71,543,854 | 71,581,574 | 37,720 +  | 1 |
| GenelD:104263   | Kdm3a         | 6 | 71,588,972 | 71,632,905 | 43,933 -  | 1 |
| GenelD:52250    | Reep1         | 6 | 71,707,681 | 71,810,710 | 103,029 + | 1 |
| GenelD:20454    | St3gal5       | 6 | 72,097,613 | 72,154,570 | 56,957 +  | 1 |
| GenelD:71093    | Atoh8         | 6 | 72,206,177 | 72,235,577 | 29,400 -  | 1 |
| GenelD:28035    | Usp39         | 6 | 72,318,676 | 72,345,175 | 26,499 -  | 1 |
| GenelD:68364    | 0610030E20Rik | 6 | 72,347,317 | 72,353,162 | 5,845 +   | 2 |
| GenelD:232086   | Tmem150a      | 6 | 72,355,483 | 72,359,762 | 4,279 +   | 2 |
| GenelD:66510    | Rnf181        | 6 | 72,359,714 | 72,362,381 | 2,667 -   | 1 |
| GenelD:53620    | Vamp5         | 6 | 72,368,049 | 72,380,468 | 12,419 -  | 2 |
| GenelD:22320    | Vamp8         | 6 | 72,385,221 | 72,390,667 | 5,446 -   | 1 |
| GenelD:56316    | Ggcx          | 6 | 72,414,333 | 72,430,707 | 16,374 +  | 1 |
| GenelD:232087   | Mat2a         | 6 | 72,432,799 | 72,439,558 | 6,759 -   | 1 |
| GenelD:78108    | 4930414L22Rik | 6 | 72,438,683 | 72,440,615 | 1,932 +   | 1 |
| GenelD:21415    | Tcf7l1        | 6 | 72,626,380 | 72,788,956 | 162,576 - | 1 |
| GenelD:74287    | Kcmf1         | 6 | 72,841,114 | 72,899,979 | 58,865 -  | 2 |
| GenelD:19240    | Tmsb10        | 6 | 72,957,347 | 72,958,748 | 1,401 -   | 1 |
| GenelD:15277    | Hk2           | 6 | 82,725,025 | 82,774,454 | 49,429 -  | 1 |
| GenelD:16950    | Loxl3         | 6 | 83,034,224 | 83,052,564 | 18,340 +  | 2 |
| GenelD:64704    | Htra2         | 6 | 83,051,266 | 83,054,571 | 3,305 -   | 2 |
| GenelD:11993    | Aup1          | 6 | 83,054,653 | 83,057,682 | 3,029 +   | 2 |
| GenelD:93838    | Dqx1          | 6 | 83,057,844 | 83,067,219 | 9,375 +   | 3 |
| GenelD:21909    | Tlx2          | 6 | 83,068,325 | 83,070,225 | 1,900 -   | 1 |
| GenelD:69837    | Pcgf1         | 6 | 83,078,390 | 83,080,855 | 2,465 +   | 1 |
| GenelD:243510   | Ccdc142       | 6 | 83,101,516 | 83,109,121 | 7,605 +   | 2 |

|                 |               |   |            |            |           |   |
|-----------------|---------------|---|------------|------------|-----------|---|
| GenelD:68499    | Mrpl53        | 6 | 83,109,108 | 83,109,932 | 824 +     | 2 |
| GenelD:57377    | Mogs          | 6 | 83,115,506 | 83,118,898 | 3,392 +   | 2 |
| GenelD:22377    | Wbp1          | 6 | 83,119,044 | 83,121,461 | 2,417 -   | 2 |
| GenelD:70020    | Ino80b        | 6 | 83,121,828 | 83,125,029 | 3,201 -   | 2 |
| GenelD:20166    | Rtkn          | 6 | 83,135,808 | 83,152,579 | 16,771 +  | 2 |
| GenelD:75659    | Wdr54         | 6 | 83,152,710 | 83,156,379 | 3,669 -   | 2 |
| GenelD:71837    | 1700003E16Rik | 6 | 83,156,404 | 83,162,975 | 6,571 +   | 2 |
| GenelD:13191    | Dctn1         | 6 | 83,165,924 | 83,200,118 | 34,194 +  | 2 |
| GenelD:17768    | Mthfd2        | 6 | 83,305,704 | 83,317,604 | 11,900 -  | 2 |
| GenelD:232157   | Mob1a         | 6 | 83,326,039 | 83,340,949 | 14,910 +  | 2 |
| GenelD:78653    | Bola3         | 6 | 83,349,484 | 83,358,392 | 8,908 +   | 1 |
| GenelD:194388   | Tet3          | 6 | 83,362,373 | 83,441,678 | 79,305 -  | 2 |
| GenelD:320775   | B230319C09Rik | 6 | 83,441,755 | 83,448,322 | 6,567 +   | 2 |
| GenelD:232174   | Cyp26b1       | 6 | 84,571,414 | 84,593,908 | 22,494 -  | 2 |
| GenelD:75914    | Exoc6b        | 6 | 84,618,486 | 85,069,513 | 451,027 - | 1 |
| GenelD:94282    | Sfxn5         | 6 | 85,213,051 | 85,333,422 | 120,371 - | 1 |
| GenelD:52055    | Rab11fip5     | 6 | 85,334,962 | 85,374,634 | 39,672 -  | 2 |
| GenelD:735267   | Mir705        | 6 | 85,336,292 | 85,336,373 | 81 -      | 1 |
| GenelD:384452   | Noto          | 6 | 85,423,886 | 85,428,877 | 4,991 +   | 1 |
| GenelD:232187   | Smyd5         | 6 | 85,431,976 | 85,446,429 | 14,453 +  | 1 |
| GenelD:330369   | Fbxo41        | 6 | 85,469,578 | 85,502,886 | 33,308 -  | 2 |
| GenelD:13656    | Egr4          | 6 | 85,511,122 | 85,513,542 | 2,420 -   | 1 |
| GenelD:236266   | Alms1         | 6 | 85,587,531 | 85,702,751 | 115,220 + | 1 |
| GenelD:26910    | Figla         | 6 | 86,017,191 | 86,020,996 | 3,805 +   | 1 |
| GenelD:21802    | Tgfa          | 6 | 86,195,251 | 86,275,449 | 80,198 +  | 1 |
| GenelD:66488    | Fam136a       | 6 | 86,365,683 | 86,370,058 | 4,375 +   | 2 |
| GenelD:68011    | Snrpg         | 6 | 86,371,540 | 86,378,902 | 7,362 +   | 2 |
| GenelD:66881    | Pcyox1        | 6 | 86,386,006 | 86,397,150 | 11,144 -  | 2 |
| GenelD:21841    | Tia1          | 6 | 86,404,219 | 86,433,405 | 29,186 +  | 2 |
| GenelD:23983    | Pcbp1         | 6 | 86,524,494 | 86,526,171 | 1,677 -   | 1 |
| GenelD:72012    | 1600020E01Rik | 6 | 86,527,330 | 86,564,449 | 37,119 +  | 1 |
| GenelD:23885    | Gmcl1         | 6 | 86,691,768 | 86,733,378 | 41,610 -  | 1 |
| GenelD:11746    | Anxa4         | 6 | 86,736,840 | 86,793,584 | 56,744 -  | 1 |
| GenelD:14583    | Gfpt1         | 6 | 87,042,846 | 87,092,207 | 49,361 +  | 1 |
| GenelD:10050326 | Gm19618       | 6 | 87,707,198 | 87,722,084 | 14,886 -  | 1 |
| GenelD:58229    | Efcc1         | 6 | 87,730,869 | 87,755,912 | 25,043 +  | 1 |
| GenelD:69834    | Rab43         | 6 | 87,788,853 | 87,811,779 | 22,926 -  | 1 |
| GenelD:57905    | Isy1          | 6 | 87,818,447 | 87,838,759 | 20,312 -  | 1 |
| GenelD:54161    | Copg1         | 6 | 87,887,940 | 87,913,595 | 25,655 +  | 1 |
| GenelD:232210   | 8430410A17Rik | 6 | 87,913,976 | 87,936,614 | 22,638 +  | 1 |
| GenelD:243529   | H1fx          | 6 | 87,980,421 | 87,981,482 | 1,061 -   | 1 |
| GenelD:434064   | Gm5577        | 6 | 87,981,683 | 87,984,180 | 2,497 +   | 1 |
| GenelD:103963   | Rpn1          | 6 | 88,084,473 | 88,105,304 | 20,831 +  | 1 |
| GenelD:74589    | Kbtbd12       | 6 | 88,613,751 | 88,627,445 | 13,694 -  | 1 |
| GenelD:23945    | Mgll          | 6 | 88,724,412 | 88,828,360 | 103,948 + | 1 |
| GenelD:17216    | Mcm2          | 6 | 88,883,474 | 88,898,780 | 15,306 -  | 1 |
| GenelD:24100    | Tpra1         | 6 | 88,902,251 | 88,912,240 | 9,989 +   | 1 |

|               |               |   |             |             |           |   |
|---------------|---------------|---|-------------|-------------|-----------|---|
| GenelD:18844  | Plxna1        | 6 | 89,316,313  | 89,362,613  | 46,300 -  | 1 |
| GenelD:232223 | Txnrd3        | 6 | 89,643,988  | 89,675,529  | 31,541 +  | 1 |
| GenelD:243537 | Uroc1         | 6 | 90,333,289  | 90,364,551  | 31,262 +  | 1 |
| GenelD:80292  | Zxdc          | 6 | 90,369,494  | 90,403,486  | 33,992 +  | 1 |
| GenelD:66277  | Klf15         | 6 | 90,462,626  | 90,475,209  | 12,583 +  | 1 |
| GenelD:232227 | Iqsec1        | 6 | 90,659,598  | 90,810,123  | 150,525 - | 2 |
| GenelD:54563  | Nup210        | 6 | 91,013,067  | 91,116,826  | 103,759 - | 1 |
| GenelD:21366  | Slc6a6        | 6 | 91,684,067  | 91,759,063  | 74,996 +  | 1 |
| GenelD:330385 | 9530026P05Rik | 6 | 92,940,582  | 93,111,749  | 171,167 + | 2 |
| GenelD:67582  | Slc25a26      | 6 | 94,500,314  | 94,604,655  | 104,341 + | 1 |
| GenelD:16206  | Lrig1         | 6 | 94,604,529  | 94,700,145  | 95,616 -  | 1 |
| GenelD:243574 | Kbtbd8        | 6 | 95,117,906  | 95,129,790  | 11,884 +  | 1 |
| GenelD:20917  | Suclg2        | 6 | 95,474,134  | 95,718,837  | 244,703 - | 1 |
| GenelD:101351 | Eogt          | 6 | 97,110,944  | 97,148,883  | 37,939 -  | 1 |
| GenelD:232286 | Tmf1          | 6 | 97,151,950  | 97,179,124  | 27,174 -  | 2 |
| GenelD:22200  | Uba3          | 6 | 97,183,816  | 97,205,642  | 21,826 -  | 1 |
| GenelD:232288 | Frm4b         | 6 | 97,286,867  | 97,617,657  | 330,790 - | 2 |
| GenelD:66892  | Eif4e3        | 6 | 99,625,137  | 99,666,771  | 41,634 -  | 1 |
| GenelD:14761  | Gpr27         | 6 | 99,692,679  | 99,693,818  | 1,139 +   | 1 |
| GenelD:56353  | Rybp          | 6 | 100,228,565 | 100,287,358 | 58,793 -  | 1 |
| GenelD:72171  | Shq1          | 6 | 100,573,082 | 100,671,157 | 98,075 -  | 1 |
| GenelD:55983  | Pdzn3         | 6 | 101,149,607 | 101,377,897 | 228,290 - | 1 |
| GenelD:70047  | Trnt1         | 6 | 106,769,138 | 106,782,474 | 13,336 +  | 1 |
| GenelD:58799  | Crbn          | 6 | 106,778,244 | 106,800,074 | 21,830 -  | 1 |
| GenelD:58911  | Sumf1         | 6 | 108,107,021 | 108,185,583 | 78,562 -  | 1 |
| GenelD:67166  | Arl8b         | 6 | 108,783,059 | 108,823,723 | 40,664 +  | 2 |
| GenelD:192193 | Edem1         | 6 | 108,828,641 | 108,859,356 | 30,715 +  | 1 |
| GenelD:18430  | Oxtr          | 6 | 112,473,684 | 112,489,808 | 16,124 -  | 1 |
| GenelD:14911  | Thumpd3       | 6 | 113,046,327 | 113,068,273 | 21,946 +  | 2 |
| GenelD:14910  | Gt(ROSA)26Sor | 6 | 113,067,428 | 113,077,244 | 9,816 -   | 2 |
| GenelD:72895  | Setd5         | 6 | 113,077,639 | 113,153,424 | 75,785 +  | 2 |
| GenelD:211232 | Cpne9         | 6 | 113,282,307 | 113,305,571 | 23,264 +  | 1 |
| GenelD:78783  | Brpf1         | 6 | 113,307,197 | 113,324,709 | 17,512 +  | 1 |
| GenelD:18294  | Ogg1          | 6 | 113,326,976 | 113,334,188 | 7,212 +   | 1 |
| GenelD:52163  | Camk1         | 6 | 113,334,124 | 113,343,922 | 9,798 -   | 1 |
| GenelD:14311  | Cidec         | 6 | 113,424,636 | 113,435,755 | 11,119 -  | 1 |
| GenelD:67767  | Jagn1         | 6 | 113,442,517 | 113,448,229 | 5,712 +   | 1 |
| GenelD:171095 | Il17rc        | 6 | 113,471,455 | 113,483,163 | 11,708 +  | 1 |
| GenelD:171508 | Creld1        | 6 | 113,483,569 | 113,493,338 | 9,769 +   | 2 |
| GenelD:210673 | Prrt3         | 6 | 113,494,095 | 113,501,818 | 7,723 -   | 1 |
| GenelD:66087  | Emc3          | 6 | 113,514,887 | 113,531,638 | 16,751 -  | 1 |
| GenelD:211651 | Fancd2        | 6 | 113,531,682 | 113,596,285 | 64,603 +  | 2 |
| GenelD:70979  | Fancd2os      | 6 | 113,596,762 | 113,600,715 | 3,953 -   | 1 |
| GenelD:101314 | Brk1          | 6 | 113,604,772 | 113,616,951 | 12,179 +  | 2 |
| GenelD:22346  | Vhl           | 6 | 113,624,021 | 113,631,633 | 7,612 +   | 1 |
| GenelD:108960 | Irak2         | 6 | 113,638,467 | 113,695,026 | 56,559 +  | 1 |
| GenelD:381801 | Tatdn2        | 6 | 113,697,499 | 113,711,068 | 13,569 +  | 1 |

|                 |               |   |             |             |           |   |
|-----------------|---------------|---|-------------|-------------|-----------|---|
| GenelD:110157   | Raf1          | 6 | 115,618,573 | 115,676,635 | 58,062 -  | 1 |
| GenelD:67088    | Cand2         | 6 | 115,774,557 | 115,805,555 | 30,998 +  | 1 |
| GenelD:19951    | Rpl32         | 6 | 115,805,514 | 115,808,743 | 3,229 -   | 1 |
| GenelD:10021745 | Snora7a       | 6 | 115,807,975 | 115,808,103 | 128 -     | 1 |
| GenelD:212516   | Efcab12       | 6 | 115,810,729 | 115,838,412 | 27,683 -  | 1 |
| GenelD:67784    | Plxnd1        | 6 | 115,954,811 | 115,995,005 | 40,194 -  | 1 |
| GenelD:330401   | Tmcc1         | 6 | 116,018,618 | 116,193,374 | 174,756 - | 1 |
| GenelD:666648   | Gm8213        | 6 | 116,195,418 | 116,195,858 | 440 -     | 1 |
| GenelD:67492    | Zfand4        | 6 | 116,264,235 | 116,329,627 | 65,392 +  | 1 |
| GenelD:71779    | March8        | 6 | 116,338,123 | 116,409,540 | 71,417 +  | 1 |
| GenelD:20315    | Cxcl12        | 6 | 117,168,535 | 117,181,368 | 12,833 +  | 1 |
| GenelD:98758    | Hnrnpf        | 6 | 117,900,340 | 117,925,622 | 25,282 +  | 1 |
| GenelD:213895   | Bms1          | 6 | 118,383,381 | 118,419,417 | 36,036 -  | 1 |
| GenelD:72720    | Zfp248        | 6 | 118,427,319 | 118,455,506 | 28,187 -  | 1 |
| GenelD:12288    | Cacna1c       | 6 | 118,592,296 | 119,196,409 | 604,113 - | 1 |
| GenelD:319618   | Dcp1b         | 6 | 119,175,253 | 119,221,614 | 46,361 +  | 1 |
| GenelD:22419    | Wnt5b         | 6 | 119,432,531 | 119,544,347 | 111,816 - | 2 |
| GenelD:101358   | Fbxl14        | 6 | 119,479,668 | 119,483,886 | 4,218 +   | 2 |
| GenelD:111173   | Erc1          | 6 | 119,570,796 | 119,848,150 | 277,354 - | 1 |
| GenelD:67289    | 3110021A11Rik | 6 | 119,848,193 | 119,849,029 | 836 +     | 1 |
| GenelD:232341   | Wnk1          | 6 | 119,923,969 | 120,038,655 | 114,686 - | 1 |
| GenelD:735290   | Mir706        | 6 | 120,034,228 | 120,034,311 | 83 -      | 1 |
| GenelD:330406   | B4galnt3      | 6 | 120,203,810 | 120,294,559 | 90,749 -  | 1 |
| GenelD:67200    | Ccdc77        | 6 | 120,324,322 | 120,364,369 | 40,047 -  | 1 |
| GenelD:214899   | Kdm5a         | 6 | 120,364,099 | 120,444,574 | 80,475 +  | 1 |
| GenelD:16172    | Il17ra        | 6 | 120,463,197 | 120,483,727 | 20,530 +  | 1 |
| GenelD:214932   | Cecr5         | 6 | 120,509,494 | 120,531,299 | 21,805 -  | 1 |
| GenelD:330409   | Cecr2         | 6 | 120,666,421 | 120,771,191 | 104,770 + | 1 |
| GenelD:11973    | Atp6v1e1      | 6 | 120,795,244 | 120,822,685 | 27,441 -  | 1 |
| GenelD:12122    | Bid           | 6 | 120,893,119 | 120,916,820 | 23,701 -  | 1 |
| GenelD:194401   | Mical3        | 6 | 120,931,546 | 121,131,022 | 199,476 - | 1 |
| GenelD:67602    | Necap1        | 6 | 122,874,557 | 122,888,941 | 14,384 +  | 1 |
| GenelD:19305    | Pex5          | 6 | 124,396,816 | 124,415,067 | 18,251 -  | 1 |
| GenelD:14792    | Lpcat3        | 6 | 124,663,104 | 124,704,716 | 41,612 +  | 2 |
| GenelD:14791    | Emg1          | 6 | 124,704,370 | 124,712,178 | 7,808 -   | 1 |
| GenelD:12034    | Phb2          | 6 | 124,712,289 | 124,716,945 | 4,656 +   | 1 |
| GenelD:387159   | Mir141        | 6 | 124,717,914 | 124,717,985 | 71 -      | 1 |
| GenelD:723944   | Mir200c       | 6 | 124,718,322 | 124,718,390 | 68 -      | 1 |
| GenelD:15170    | Ptpn6         | 6 | 124,720,718 | 124,738,709 | 17,991 -  | 3 |
| GenelD:14790    | Grcc10        | 6 | 124,739,183 | 124,741,079 | 1,896 -   | 2 |
| GenelD:19866    | Rnu7          | 6 | 124,741,225 | 124,741,286 | 61 -      | 2 |
| GenelD:13498    | Atn1          | 6 | 124,742,544 | 124,756,487 | 13,943 -  | 2 |
| GenelD:14794    | Spsb2         | 6 | 124,808,941 | 124,810,614 | 1,673 +   | 2 |
| GenelD:21991    | Tpi1          | 6 | 124,810,592 | 124,814,296 | 3,704 -   | 2 |
| GenelD:22225    | Usp5          | 6 | 124,815,019 | 124,829,447 | 14,428 -  | 2 |
| GenelD:16768    | Lag3          | 6 | 124,904,359 | 124,911,705 | 7,346 -   | 1 |
| GenelD:69202    | Ptms          | 6 | 124,913,675 | 124,917,946 | 4,271 -   | 1 |

|                 |               |   |             |             |           |   |
|-----------------|---------------|---|-------------|-------------|-----------|---|
| GenelD:442825   | A230083G16Rik | 6 | 124,916,863 | 124,925,844 | 8,981 +   | 2 |
| GenelD:30853    | Mlf2          | 6 | 124,931,388 | 124,936,149 | 4,761 +   | 1 |
| GenelD:26894    | Cops7a        | 6 | 124,958,411 | 124,965,529 | 7,118 -   | 1 |
| GenelD:319352   | Pianp         | 6 | 124,996,720 | 125,003,096 | 6,376 +   | 1 |
| GenelD:107932   | Chd4          | 6 | 125,096,163 | 125,130,514 | 34,351 +  | 2 |
| GenelD:110109   | Nop2          | 6 | 125,131,883 | 125,144,753 | 12,870 +  | 1 |
| GenelD:320678   | Iffo1         | 6 | 125,145,241 | 125,161,782 | 16,541 +  | 2 |
| GenelD:14433    | Gapdh         | 6 | 125,161,852 | 125,165,583 | 3,731 -   | 2 |
| GenelD:68298    | Ncapd2        | 6 | 125,168,007 | 125,191,586 | 23,579 -  | 2 |
| GenelD:22317    | Vamp1         | 6 | 125,215,581 | 125,222,306 | 6,725 +   | 1 |
| GenelD:213233   | Tapbpl        | 6 | 125,224,205 | 125,231,860 | 7,655 -   | 1 |
| GenelD:17000    | Ltbr          | 6 | 125,306,571 | 125,313,870 | 7,299 -   | 1 |
| GenelD:20276    | Scnn1a        | 6 | 125,321,340 | 125,344,943 | 23,603 +  | 1 |
| GenelD:12527    | Cd9           | 6 | 125,460,266 | 125,494,755 | 34,489 -  | 1 |
| GenelD:19362    | Rad51ap1      | 6 | 126,923,419 | 126,939,555 | 16,136 -  | 1 |
| GenelD:28040    | D6Wsu163e     | 6 | 126,939,966 | 126,975,704 | 35,738 +  | 1 |
| GenelD:64654    | Fgf23         | 6 | 127,072,902 | 127,081,408 | 8,506 +   | 1 |
| GenelD:319801   | 9630033F20Rik | 6 | 127,085,116 | 127,109,552 | 24,436 -  | 1 |
| GenelD:12444    | Ccnd2         | 6 | 127,125,708 | 127,151,048 | 25,340 -  | 1 |
| GenelD:77558    | 9330179D12Rik | 6 | 127,149,389 | 127,212,419 | 63,030 +  | 1 |
| GenelD:109246   | Tspan9        | 6 | 127,961,400 | 128,143,578 | 182,178 - | 1 |
| GenelD:22158    | Tulp3         | 6 | 128,321,161 | 128,355,851 | 34,690 -  | 2 |
| GenelD:10105575 | LOC101055755  | 6 | 128,356,004 | 128,358,837 | 2,833 +   | 2 |
| GenelD:72440    | Rhno1         | 6 | 128,357,000 | 128,362,897 | 5,897 -   | 2 |
| GenelD:14235    | Foxm1         | 6 | 128,362,994 | 128,375,886 | 12,892 +  | 2 |
| GenelD:14228    | Fkbp4         | 6 | 128,430,107 | 128,438,631 | 8,524 -   | 1 |
| GenelD:791299   | Gm10069       | 6 | 128,438,757 | 128,503,281 | 64,524 +  | 1 |
| GenelD:14011    | Etv6          | 6 | 134,035,707 | 134,270,158 | 234,451 + | 1 |
| GenelD:16974    | Lrp6          | 6 | 134,446,476 | 134,566,913 | 120,437 - | 1 |
| GenelD:232430   | Crebl2        | 6 | 134,830,199 | 134,857,883 | 27,684 +  | 1 |
| GenelD:12576    | Cdkn1b        | 6 | 134,920,401 | 134,925,525 | 5,124 +   | 2 |
| GenelD:381822   | 1190002F15Rik | 6 | 134,929,092 | 134,951,718 | 22,626 +  | 2 |
| GenelD:381823   | Apold1        | 6 | 134,982,001 | 134,986,836 | 4,835 +   | 1 |
| GenelD:10050288 | Gm19434       | 6 | 135,188,480 | 135,194,959 | 6,479 +   | 1 |
| GenelD:74525    | 8430419L09Rik | 6 | 135,197,987 | 135,236,240 | 38,253 +  | 1 |
| GenelD:320332   | Hist4h4       | 6 | 136,801,553 | 136,804,431 | 2,878 -   | 1 |
| GenelD:232440   | H2afj         | 6 | 136,808,248 | 136,810,074 | 1,826 +   | 1 |
| GenelD:60321    | Wbp11         | 6 | 136,813,654 | 136,828,216 | 14,562 -  | 1 |
| GenelD:232441   | Rerg          | 6 | 137,054,825 | 137,170,496 | 115,671 - | 1 |
| GenelD:13860    | Eps8          | 6 | 137,477,245 | 137,649,120 | 171,875 - | 1 |
| GenelD:109135   | Plekha5       | 6 | 140,424,099 | 140,594,906 | 170,807 + | 1 |
| GenelD:11569    | Aebp2         | 6 | 140,622,663 | 140,677,418 | 54,755 +  | 1 |
| GenelD:54611    | Pde3a         | 6 | 141,249,269 | 141,499,351 | 250,082 + | 1 |
| GenelD:232491   | Pyroxd1       | 6 | 142,345,697 | 142,362,624 | 16,927 +  | 1 |
| GenelD:19691    | Recql         | 6 | 142,350,342 | 142,387,087 | 36,745 -  | 2 |
| GenelD:66964    | Golt1b        | 6 | 142,387,243 | 142,403,858 | 16,615 +  | 1 |
| GenelD:16832    | Ldhb          | 6 | 142,490,249 | 142,507,943 | 17,694 -  | 1 |



|                 |               |   |             |             |           |   |
|-----------------|---------------|---|-------------|-------------|-----------|---|
| GenelD:12764    | Cmas          | 6 | 142,756,686 | 142,775,714 | 19,028 +  | 1 |
| GenelD:20449    | St8sia1       | 6 | 142,821,541 | 142,964,452 | 142,911 - | 1 |
| GenelD:74741    | C2cd5         | 6 | 143,010,920 | 143,100,107 | 89,187 -  | 1 |
| GenelD:75320    | Etnk1         | 6 | 143,167,230 | 143,208,546 | 41,316 +  | 1 |
| GenelD:12035    | Bcat1         | 6 | 144,993,835 | 145,076,157 | 82,322 -  | 1 |
| GenelD:16653    | Kras          | 6 | 145,216,699 | 145,250,231 | 33,532 -  | 1 |
| GenelD:10003949 | Gm15706       | 6 | 145,250,552 | 145,251,856 | 1,304 +   | 1 |
| GenelD:79362    | Bhlhe41       | 6 | 145,862,737 | 145,865,340 | 2,603 -   | 2 |
| GenelD:16439    | Itpr2         | 6 | 146,111,480 | 146,501,912 | 390,432 - | 1 |
| GenelD:67623    | Tm7sf3        | 6 | 146,602,276 | 146,634,592 | 32,316 -  | 1 |
| GenelD:108098   | Med21         | 6 | 146,642,579 | 146,650,600 | 8,021 +   | 1 |
| GenelD:232533   | Stk38l        | 6 | 146,724,930 | 146,778,814 | 53,884 +  | 1 |
| GenelD:67533    | Ppfibp1       | 6 | 146,888,494 | 147,032,023 | 143,529 + | 1 |
| GenelD:66532    | Rep15         | 6 | 147,032,537 | 147,033,518 | 981 +     | 1 |
| GenelD:232536   | Mrps35        | 6 | 147,042,770 | 147,070,902 | 28,132 +  | 1 |
| GenelD:545893   | Mansc4        | 6 | 147,075,062 | 147,087,032 | 11,970 -  | 1 |
| GenelD:232539   | Klhl42        | 6 | 147,091,075 | 147,112,778 | 21,703 +  | 1 |
| GenelD:622129   | Gm6288        | 6 | 147,438,362 | 147,476,284 | 37,922 -  | 1 |
| GenelD:67015    | Ccdc91        | 6 | 147,475,871 | 147,632,612 | 156,741 + | 1 |
| GenelD:67456    | Ergic2        | 6 | 148,179,318 | 148,212,374 | 33,056 -  | 1 |
| GenelD:320737   | 4732416N19Rik | 6 | 148,212,288 | 148,235,663 | 23,375 +  | 1 |
| GenelD:387314   | Tmtc1         | 6 | 148,232,430 | 148,444,352 | 211,922 - | 2 |
| GenelD:56306    | Fam60a        | 6 | 148,921,057 | 148,946,432 | 25,375 -  | 1 |
| GenelD:109163   | 3010003L21Rik | 6 | 148,944,867 | 148,947,129 | 2,262 +   | 1 |
| GenelD:320560   | Dennd5b       | 6 | 148,988,069 | 149,101,680 | 113,611 - | 1 |
| GenelD:67246    | 2810474O19Rik | 6 | 149,309,414 | 149,335,663 | 26,249 +  | 1 |
| GenelD:68988    | Prpf31        | 7 | 3,629,985   | 3,642,485   | 12,500 +  | 1 |
| GenelD:232791   | Cnot3         | 7 | 3,645,269   | 3,661,109   | 15,840 +  | 1 |
| GenelD:10062859 | Mir3572       | 7 | 3,655,962   | 3,656,047   | 85 +      | 1 |
| GenelD:77323    | 9430041J12Rik | 7 | 4,074,125   | 4,120,728   | 46,603 -  | 1 |
| GenelD:57776    | Ttyh1         | 7 | 4,119,533   | 4,136,241   | 16,708 +  | 1 |
| GenelD:10003739 | D030047H15Rik | 7 | 4,126,340   | 4,136,926   | 10,586 -  | 1 |
| GenelD:232798   | Leng8         | 7 | 4,137,056   | 4,148,173   | 11,117 +  | 1 |
| GenelD:243813   | Leng9         | 7 | 4,148,183   | 4,149,872   | 1,689 -   | 1 |
| GenelD:58804    | Cdc42ep5      | 7 | 4,151,260   | 4,164,702   | 13,442 -  | 1 |
| GenelD:78052    | Tmem190       | 7 | 4,782,940   | 4,784,341   | 1,401 +   | 1 |
| GenelD:664968   | Tmem238       | 7 | 4,784,785   | 4,789,560   | 4,775 -   | 1 |
| GenelD:19943    | Rpl28         | 7 | 4,792,965   | 4,794,547   | 1,582 +   | 1 |
| GenelD:77891    | Ube2s         | 7 | 4,808,014   | 4,812,340   | 4,326 -   | 1 |
| GenelD:232816   | Zfp628        | 7 | 4,915,217   | 4,922,003   | 6,786 +   | 2 |
| GenelD:269854   | Nat14         | 7 | 4,922,251   | 4,925,006   | 2,755 +   | 2 |
| GenelD:269855   | Ssc5d         | 7 | 4,925,844   | 4,944,797   | 18,953 +  | 1 |
| GenelD:68490    | Zfp579        | 7 | 4,992,852   | 4,996,101   | 3,249 -   | 1 |
| GenelD:23877    | Fiz1          | 7 | 5,007,056   | 5,014,728   | 7,672 -   | 2 |
| GenelD:66056    | Zfp524        | 7 | 5,015,508   | 5,018,488   | 2,980 +   | 2 |
| GenelD:319748   | Zfp865        | 7 | 5,020,376   | 5,033,223   | 12,847 +  | 2 |
| GenelD:654801   | Zfp784        | 7 | 5,034,446   | 5,038,446   | 4,000 -   | 1 |

|                 |         |   |            |            |           |   |
|-----------------|---------|---|------------|------------|-----------|---|
| GenelD:68992    | Zfp580  | 7 | 5,051,532  | 5,053,723  | 2,191 +   | 4 |
| GenelD:232821   | Ccdc106 | 7 | 5,056,726  | 5,060,785  | 4,059 +   | 4 |
| GenelD:22185    | U2af2   | 7 | 5,062,143  | 5,079,945  | 17,802 +  | 5 |
| GenelD:13854    | Epn1    | 7 | 5,080,235  | 5,098,178  | 17,943 +  | 1 |
| GenelD:67109    | Zfp787  | 7 | 6,131,489  | 6,155,971  | 24,482 -  | 2 |
| GenelD:10004245 | Gm16532 | 7 | 6,415,175  | 6,431,086  | 15,911 +  | 1 |
| GenelD:18616    | Peg3    | 7 | 6,705,960  | 6,730,419  | 24,459 -  | 1 |
| GenelD:57775    | Usp29   | 7 | 6,730,741  | 6,967,220  | 236,479 + | 1 |
| GenelD:67370    | Zfp606  | 7 | 12,478,305 | 12,496,235 | 17,930 +  | 1 |
| GenelD:243834   | Zfp324  | 7 | 12,965,864 | 12,973,822 | 7,958 +   | 1 |
| GenelD:26459    | Slc27a5 | 7 | 12,988,346 | 12,998,192 | 9,846 -   | 1 |
| GenelD:232879   | Zbtb45  | 7 | 13,005,666 | 13,009,800 | 4,134 -   | 2 |
| GenelD:21849    | Trim28  | 7 | 13,024,152 | 13,031,032 | 6,880 +   | 1 |
| GenelD:68953    | Chmp2a  | 7 | 13,032,006 | 13,034,777 | 2,771 -   | 2 |
| GenelD:22192    | Ube2m   | 7 | 13,035,120 | 13,038,275 | 3,155 -   | 2 |
| GenelD:109889   | Mzf1    | 7 | 13,042,303 | 13,054,764 | 12,461 -  | 1 |
| GenelD:666528   | Zfp541  | 7 | 16,071,942 | 16,096,328 | 24,386 +  | 1 |
| GenelD:108124   | Napa    | 7 | 16,098,643 | 16,117,975 | 19,332 +  | 1 |
| GenelD:110891   | Slc8a2  | 7 | 16,130,300 | 16,160,511 | 30,211 +  | 1 |
| GenelD:66300    | Prr24   | 7 | 16,272,013 | 16,273,692 | 1,679 -   | 1 |
| GenelD:243846   | Ccdc9   | 7 | 16,274,042 | 16,286,795 | 12,753 -  | 1 |
| GenelD:170770   | Bbc3    | 7 | 16,309,583 | 16,318,334 | 8,751 +   | 3 |
| GenelD:56459    | Sae1    | 7 | 16,327,054 | 16,387,785 | 60,731 -  | 1 |
| GenelD:330474   | Zc3h4   | 7 | 16,401,196 | 16,437,696 | 36,500 +  | 1 |
| GenelD:69094    | Tmem160 | 7 | 16,452,779 | 16,455,490 | 2,711 +   | 1 |
| GenelD:18142    | Npas1   | 7 | 16,455,721 | 16,476,780 | 21,059 -  | 1 |
| GenelD:20514    | Slc1a5  | 7 | 16,781,346 | 16,798,274 | 16,928 +  | 1 |
| GenelD:243853   | Fkrp    | 7 | 16,809,267 | 16,816,732 | 7,465 -   | 2 |
| GenelD:97387    | Strn4   | 7 | 16,815,889 | 16,840,931 | 25,042 +  | 2 |
| GenelD:12315    | Calm3   | 7 | 16,915,379 | 16,924,032 | 8,653 -   | 1 |
| GenelD:434128   | Pnmal2  | 7 | 16,944,682 | 16,948,828 | 4,146 +   | 1 |
| GenelD:434130   | Ccdc8   | 7 | 16,994,588 | 16,996,645 | 2,057 +   | 1 |
| GenelD:19060    | Ppp5c   | 7 | 17,004,640 | 17,027,914 | 23,274 -  | 2 |
| GenelD:53417    | Hif3a   | 7 | 17,030,993 | 17,062,427 | 31,434 -  | 2 |
| GenelD:378430   | Nanos2  | 7 | 18,987,524 | 18,988,962 | 1,438 +   | 1 |
| GenelD:232934   | Mypop   | 7 | 18,991,245 | 19,001,766 | 10,521 +  | 2 |
| GenelD:272359   | Irf2bp1 | 7 | 19,004,065 | 19,006,763 | 2,698 +   | 1 |
| GenelD:15377    | Foxa3   | 7 | 19,013,283 | 19,023,539 | 10,256 -  | 2 |
| GenelD:68188    | Sympk   | 7 | 19,024,377 | 19,054,622 | 30,245 +  | 1 |
| GenelD:83434    | Rsph6a  | 7 | 19,054,687 | 19,074,447 | 19,760 +  | 1 |
| GenelD:13401    | Dmwd    | 7 | 19,076,200 | 19,082,775 | 6,575 +   | 1 |
| GenelD:13400    | Dmpk    | 7 | 19,083,849 | 19,093,821 | 9,972 +   | 2 |
| GenelD:10052650 | Mir3100 | 7 | 19,086,828 | 19,086,892 | 64 +      | 2 |
| GenelD:20475    | Six5    | 7 | 19,094,544 | 19,098,345 | 3,801 +   | 1 |
| GenelD:67369    | Qpctl   | 7 | 19,140,217 | 19,149,196 | 8,979 -   | 1 |
| GenelD:107686   | Snrpd2  | 7 | 19,149,838 | 19,152,726 | 2,888 +   | 1 |
| GenelD:381853   | Gipr    | 7 | 19,157,125 | 19,166,127 | 9,002 -   | 1 |

|               |               |   |            |            |          |   |
|---------------|---------------|---|------------|------------|----------|---|
| GenelD:22323  | Vasp          | 7 | 19,256,929 | 19,271,854 | 14,925 - | 2 |
| GenelD:232941 | Ppm1n         | 7 | 19,276,807 | 19,280,049 | 3,242 -  | 2 |
| GenelD:20167  | Rtn2          | 7 | 19,282,667 | 19,296,160 | 13,493 + | 1 |
| GenelD:22069  | n-Ts2         | 7 | 19,301,244 | 19,301,329 | 85 +     | 1 |
| GenelD:14282  | Fosb          | 7 | 19,302,696 | 19,310,045 | 7,349 -  | 2 |
| GenelD:330479 | D830036C21Rik | 7 | 19,320,117 | 19,342,225 | 22,108 - | 1 |
| GenelD:13870  | Ercc1         | 7 | 19,345,071 | 19,356,524 | 11,453 + | 1 |
| GenelD:70333  | Cd3eap        | 7 | 19,356,007 | 19,359,483 | 3,476 -  | 1 |
| GenelD:333654 | Ppp1r13l      | 7 | 19,361,216 | 19,378,533 | 17,317 + | 1 |
| GenelD:232944 | Mark4         | 7 | 19,426,075 | 19,458,494 | 32,419 - | 1 |
| GenelD:74463  | Exoc3l2       | 7 | 19,463,331 | 19,496,762 | 33,431 + | 4 |
| GenelD:232946 | Bloc1s3       | 7 | 19,505,804 | 19,508,331 | 2,527 -  | 2 |
| GenelD:67091  | Trappc6a      | 7 | 19,508,729 | 19,516,145 | 7,416 +  | 3 |
| GenelD:69547  | Nkpd1         | 7 | 19,518,731 | 19,525,050 | 6,319 +  | 2 |
| GenelD:232947 | Ppp1r37       | 7 | 19,530,967 | 19,562,398 | 31,431 - | 2 |
| GenelD:69731  | Gemin7        | 7 | 19,564,949 | 19,573,343 | 8,394 -  | 1 |
| GenelD:19698  | Relb          | 7 | 19,606,222 | 19,629,438 | 23,216 - | 2 |
| GenelD:56457  | Clptm1        | 7 | 19,631,580 | 19,665,030 | 33,450 - | 2 |
| GenelD:11813  | Apoc2         | 7 | 19,671,579 | 19,676,864 | 5,285 -  | 1 |
| GenelD:19294  | Pvrl2         | 7 | 19,716,644 | 19,749,573 | 32,929 - | 1 |
| GenelD:57278  | Bcam          | 7 | 19,756,138 | 19,770,532 | 14,394 - | 1 |
| GenelD:18793  | Plaur         | 7 | 24,462,500 | 24,475,873 | 13,373 + | 1 |
| GenelD:260299 | Cadm4         | 7 | 24,482,023 | 24,504,533 | 22,510 + | 2 |
| GenelD:232969 | Zfp428        | 7 | 24,507,087 | 24,515,682 | 8,595 +  | 1 |
| GenelD:210146 | Irgq          | 7 | 24,530,648 | 24,538,600 | 7,952 +  | 1 |
| GenelD:641361 | Pinlyp        | 7 | 24,541,658 | 24,546,005 | 4,347 -  | 1 |
| GenelD:101544 | Zfp575        | 7 | 24,583,838 | 24,587,641 | 3,803 -  | 1 |
| GenelD:66071  | Ethe1         | 7 | 24,587,543 | 24,608,925 | 21,382 + | 1 |
| GenelD:71241  | Dmrtc2        | 7 | 24,870,057 | 24,877,651 | 7,594 +  | 1 |
| GenelD:20085  | Rps19         | 7 | 24,884,714 | 24,889,802 | 5,088 +  | 1 |
| GenelD:14470  | Rabac1        | 7 | 24,969,750 | 24,972,728 | 2,978 -  | 1 |
| GenelD:232975 | Atp1a3        | 7 | 24,978,167 | 25,005,895 | 27,728 - | 2 |
| GenelD:14809  | Grik5         | 7 | 25,009,849 | 25,072,369 | 62,520 - | 3 |
| GenelD:232976 | Zfp574        | 7 | 25,077,205 | 25,083,492 | 6,287 +  | 1 |
| GenelD:18987  | Pou2f2        | 7 | 25,091,114 | 25,132,460 | 41,346 - | 1 |
| GenelD:67379  | Dedd2         | 7 | 25,202,840 | 25,219,859 | 17,019 - | 1 |
| GenelD:210172 | Zfp526        | 7 | 25,221,451 | 25,227,505 | 6,054 +  | 1 |
| GenelD:606496 | Gsk3a         | 7 | 25,228,259 | 25,237,851 | 9,592 -  | 2 |
| GenelD:77124  | 9130221H12Rik | 7 | 25,228,723 | 25,230,264 | 1,541 +  | 1 |
| GenelD:13875  | Erf           | 7 | 25,242,560 | 25,250,758 | 8,198 -  | 3 |
| GenelD:71722  | Cic           | 7 | 25,282,179 | 25,294,148 | 11,969 + | 5 |
| GenelD:18476  | Pafah1b3      | 7 | 25,295,049 | 25,297,955 | 2,906 -  | 2 |
| GenelD:623131 | Prr19         | 7 | 25,301,359 | 25,304,133 | 2,774 +  | 2 |
| GenelD:330485 | Tmem145       | 7 | 25,306,108 | 25,316,195 | 10,087 + | 3 |
| GenelD:269878 | Megf8         | 7 | 25,317,164 | 25,365,917 | 48,753 + | 1 |
| GenelD:66349  | Atp5sl        | 7 | 25,619,493 | 25,625,550 | 6,057 +  | 1 |
| GenelD:232984 | B3gnt8        | 7 | 25,627,624 | 25,629,490 | 1,866 +  | 1 |

|                 |               |   |            |            |          |   |
|-----------------|---------------|---|------------|------------|----------|---|
| GenelD:12039    | Bckdha        | 7 | 25,629,852 | 25,658,761 | 28,909 - | 1 |
| GenelD:232987   | B9d2          | 7 | 25,681,158 | 25,686,558 | 5,400 +  | 1 |
| GenelD:21803    | Tgfb1         | 7 | 25,687,002 | 25,704,996 | 17,994 + | 1 |
| GenelD:232989   | Hnrnpul1      | 7 | 25,722,036 | 25,754,720 | 32,684 - | 1 |
| GenelD:26362    | Axl           | 7 | 25,756,500 | 25,788,733 | 32,233 - | 2 |
| GenelD:384724   | Cyp2t4        | 7 | 27,153,714 | 27,158,564 | 4,850 +  | 1 |
| GenelD:112406   | Egln2         | 7 | 27,158,658 | 27,166,802 | 8,144 -  | 1 |
| GenelD:19342    | Rab4b         | 7 | 27,168,433 | 27,178,883 | 10,450 - | 1 |
| GenelD:10052650 | Mir3101       | 7 | 27,176,006 | 27,176,093 | 87 -     | 1 |
| GenelD:53607    | Snrpa         | 7 | 27,187,006 | 27,196,271 | 9,265 -  | 1 |
| GenelD:414069   | BC024978      | 7 | 27,195,781 | 27,204,320 | 8,539 +  | 1 |
| GenelD:10031683 | Mir1191       | 7 | 27,205,536 | 27,205,655 | 119 +    | 1 |
| GenelD:233011   | Itpkc         | 7 | 27,207,170 | 27,228,597 | 21,427 - | 1 |
| GenelD:76889    | Adck4         | 7 | 27,233,013 | 27,257,949 | 24,936 + | 1 |
| GenelD:108075   | Ltbp4         | 7 | 27,305,141 | 27,337,612 | 32,471 - | 1 |
| GenelD:192192   | Shkbp1        | 7 | 27,342,133 | 27,356,008 | 13,875 - | 1 |
| GenelD:80297    | Sptbn4        | 7 | 27,356,383 | 27,446,589 | 90,206 - | 1 |
| GenelD:66367    | 2310022A10Rik | 7 | 27,553,295 | 27,582,099 | 28,804 + | 1 |
| GenelD:11652    | Akt2          | 7 | 27,591,560 | 27,639,453 | 47,893 + | 1 |
| GenelD:269881   | Map3k10       | 7 | 27,656,377 | 27,674,598 | 18,221 - | 1 |
| GenelD:112415   | C030039L03Rik | 7 | 27,674,661 | 27,706,484 | 31,823 + | 1 |
| GenelD:319482   | 9530053A07Rik | 7 | 28,129,466 | 28,164,811 | 35,345 + | 1 |
| GenelD:14113    | Fbl           | 7 | 28,169,748 | 28,179,269 | 9,521 +  | 2 |
| GenelD:13549    | Dyrk1b        | 7 | 28,179,483 | 28,187,294 | 7,811 +  | 2 |
| GenelD:386655   | Eid2          | 7 | 28,267,881 | 28,269,168 | 1,287 +  | 1 |
| GenelD:434156   | Eid2b         | 7 | 28,277,706 | 28,280,129 | 2,423 +  | 1 |
| GenelD:280621   | BC089491      | 7 | 28,284,652 | 28,291,134 | 6,482 -  | 2 |
| GenelD:13389    | Dll3          | 7 | 28,293,555 | 28,301,785 | 8,230 -  | 2 |
| GenelD:66525    | Timm50        | 7 | 28,305,826 | 28,312,046 | 6,220 -  | 1 |
| GenelD:20924    | Supt5         | 7 | 28,314,894 | 28,338,719 | 23,825 - | 1 |
| GenelD:101497   | Plekhg2       | 7 | 28,359,604 | 28,372,662 | 13,058 - | 3 |
| GenelD:22695    | Zfp36         | 7 | 28,376,784 | 28,379,228 | 2,444 -  | 3 |
| GenelD:67224    | Med29         | 7 | 28,385,247 | 28,392,690 | 7,443 -  | 2 |
| GenelD:233040   | Fbxo27        | 7 | 28,692,849 | 28,699,338 | 6,489 +  | 1 |
| GenelD:320435   | Rinl          | 7 | 28,788,969 | 28,798,965 | 9,996 +  | 1 |
| GenelD:15388    | Hnrnp1        | 7 | 28,810,890 | 28,822,266 | 11,376 + | 2 |
| GenelD:60595    | Actn4         | 7 | 28,893,254 | 28,962,280 | 69,026 - | 1 |
| GenelD:73830    | Eif3k         | 7 | 28,971,373 | 28,981,814 | 10,441 - | 1 |
| GenelD:233046   | Rasgrp4       | 7 | 29,134,933 | 29,153,961 | 19,028 + | 1 |
| GenelD:73833    | Fam98c        | 7 | 29,152,510 | 29,156,210 | 3,700 -  | 1 |
| GenelD:101809   | Spred3        | 7 | 29,158,829 | 29,168,647 | 9,818 -  | 2 |
| GenelD:243897   | Ggn           | 7 | 29,170,210 | 29,173,933 | 3,723 +  | 1 |
| GenelD:57296    | Psmd8         | 7 | 29,174,187 | 29,180,673 | 6,486 -  | 1 |
| GenelD:320225   | Catsperg1     | 7 | 29,181,532 | 29,214,033 | 32,501 - | 1 |
| GenelD:52150    | Kcnk6         | 7 | 29,221,928 | 29,232,522 | 10,594 - | 1 |
| GenelD:77254    | Yif1b         | 7 | 29,238,323 | 29,247,532 | 9,209 +  | 1 |
| GenelD:20733    | Spint2        | 7 | 29,256,330 | 29,281,977 | 25,647 - | 2 |

|                 |               |   |            |            |           |   |
|-----------------|---------------|---|------------|------------|-----------|---|
| GenelD:68458    | Ppp1r14a      | 7 | 29,289,320 | 29,293,390 | 4,070 +   | 2 |
| GenelD:29861    | Dpf1          | 7 | 29,304,005 | 29,317,586 | 13,581 +  | 1 |
| GenelD:114675   | 4932431P20Rik | 7 | 29,524,543 | 29,538,055 | 13,512 +  | 1 |
| GenelD:243906   | Zfp14         | 7 | 30,036,359 | 30,051,396 | 15,037 -  | 1 |
| GenelD:330502   | Zfp82         | 7 | 30,056,034 | 30,072,823 | 16,789 -  | 2 |
| GenelD:72556    | Zfp566        | 7 | 30,077,337 | 30,090,510 | 13,173 -  | 1 |
| GenelD:12865    | Cox7a1        | 7 | 30,184,171 | 30,186,030 | 1,859 +   | 1 |
| GenelD:12336    | Capns1        | 7 | 30,186,942 | 30,195,048 | 8,106 -   | 1 |
| GenelD:233064   | Wdr62         | 7 | 30,240,138 | 30,280,421 | 40,283 -  | 1 |
| GenelD:75629    | Thap8         | 7 | 30,280,094 | 30,290,237 | 10,143 +  | 1 |
| GenelD:233065   | Alkbh6        | 7 | 30,308,753 | 30,314,303 | 5,550 +   | 1 |
| GenelD:233066   | Syne4         | 7 | 30,314,816 | 30,319,045 | 4,229 +   | 1 |
| GenelD:68332    | Sdhaf1        | 7 | 30,321,409 | 30,322,375 | 966 -     | 1 |
| GenelD:233067   | Lrfr3         | 7 | 30,355,514 | 30,362,772 | 7,258 -   | 1 |
| GenelD:75410    | Wbp7          | 7 | 30,568,855 | 30,588,726 | 19,871 -  | 1 |
| GenelD:58206    | Zbtb32        | 7 | 30,589,681 | 30,592,942 | 3,261 -   | 1 |
| GenelD:11944    | Atp4a         | 7 | 30,712,232 | 30,725,534 | 13,302 +  | 1 |
| GenelD:69804    | Tmem147       | 7 | 30,727,701 | 30,729,534 | 1,833 -   | 1 |
| GenelD:791088   | C630016N16Rik | 7 | 30,729,579 | 30,745,929 | 16,350 +  | 1 |
| GenelD:14447    | Gapdhs        | 7 | 30,729,887 | 30,739,356 | 9,469 -   | 1 |
| GenelD:22282    | Usf2          | 7 | 30,945,248 | 30,956,803 | 11,555 -  | 1 |
| GenelD:10004382 | Gm4673        | 7 | 30,957,409 | 30,961,782 | 4,373 +   | 1 |
| GenelD:54135    | Lsr           | 7 | 30,957,770 | 30,973,469 | 15,699 -  | 2 |
| GenelD:76415    | Fam187b       | 7 | 30,973,804 | 30,989,726 | 15,922 +  | 1 |
| GenelD:18301    | Fxyd5         | 7 | 31,032,723 | 31,042,322 | 9,599 -   | 1 |
| GenelD:57780    | Fxyd7         | 7 | 31,042,515 | 31,051,454 | 8,939 -   | 1 |
| GenelD:56188    | Fxyd1         | 7 | 31,051,678 | 31,055,656 | 3,978 -   | 1 |
| GenelD:243914   | Lgi4          | 7 | 31,059,935 | 31,070,935 | 11,000 +  | 1 |
| GenelD:52857    | Gramd1a       | 7 | 31,130,127 | 31,151,050 | 20,923 -  | 1 |
| GenelD:50995    | Uba2          | 7 | 34,140,697 | 34,168,529 | 27,832 -  | 1 |
| GenelD:10004341 | Gm12778       | 7 | 34,175,712 | 34,176,044 | 332 +     | 1 |
| GenelD:68079    | Pdcd2l        | 7 | 34,184,497 | 34,196,647 | 12,150 -  | 1 |
| GenelD:14751    | Gpi1          | 7 | 34,201,327 | 34,230,305 | 28,978 -  | 1 |
| GenelD:67070    | Lsm14a        | 7 | 34,344,719 | 34,389,540 | 44,821 -  | 1 |
| GenelD:233107   | Kctd15        | 7 | 34,639,015 | 34,652,841 | 13,826 -  | 2 |
| GenelD:68947    | Chst8         | 7 | 34,674,468 | 34,812,711 | 138,243 - | 1 |
| GenelD:18624    | Pepd          | 7 | 34,912,407 | 35,044,708 | 132,301 + | 1 |
| GenelD:12611    | Cebpg         | 7 | 35,046,422 | 35,056,566 | 10,144 -  | 1 |
| GenelD:12606    | Cebpa         | 7 | 35,119,293 | 35,121,928 | 2,635 +   | 1 |
| GenelD:110959   | Nudt19        | 7 | 35,547,185 | 35,555,928 | 8,743 -   | 1 |
| GenelD:243923   | Rgs9bp        | 7 | 35,578,993 | 35,585,582 | 6,589 -   | 1 |
| GenelD:245886   | Ankrd27       | 7 | 35,586,247 | 35,639,237 | 52,990 +  | 2 |
| GenelD:56330    | Pdcd5         | 7 | 35,641,985 | 35,647,482 | 5,497 -   | 1 |
| GenelD:233115   | Dpy19l3       | 7 | 35,685,500 | 35,754,454 | 68,954 -  | 1 |
| GenelD:668501   | Zfp507        | 7 | 35,772,346 | 35,802,989 | 30,643 -  | 1 |
| GenelD:78547    | E130304l02Rik | 7 | 35,802,592 | 35,838,074 | 35,482 +  | 1 |
| GenelD:243931   | Tshz3         | 7 | 36,698,118 | 36,773,457 | 75,339 +  | 3 |

|                 |               |   |            |            |          |   |
|-----------------|---------------|---|------------|------------|----------|---|
| GenelD:19777    | Uri1          | 7 | 37,959,992 | 38,019,552 | 59,560 - | 1 |
| GenelD:70227    | Zfp619        | 7 | 39,517,766 | 39,540,415 | 22,649 + | 1 |
| GenelD:69930    | Zfp715        | 7 | 43,296,523 | 43,313,261 | 16,738 - | 1 |
| GenelD:70004    | 1700028J19Rik | 7 | 44,229,929 | 44,236,122 | 6,193 -  | 1 |
| GenelD:668661   | 2410002F23Rik | 7 | 44,246,722 | 44,252,319 | 5,597 +  | 1 |
| GenelD:10021743 | Snord88c      | 7 | 44,249,855 | 44,249,938 | 83 +     | 1 |
| GenelD:10021743 | Snord88a      | 7 | 44,250,150 | 44,250,221 | 71 +     | 1 |
| GenelD:10050399 | Acpt          | 7 | 44,253,087 | 44,257,204 | 4,117 -  | 1 |
| GenelD:20256    | Clec11a       | 7 | 44,303,766 | 44,306,959 | 3,193 -  | 1 |
| GenelD:243961   | Shank1        | 7 | 44,310,264 | 44,358,353 | 48,089 + | 2 |
| GenelD:69349    | 1700008O03Rik | 7 | 44,360,043 | 44,375,030 | 14,987 - | 1 |
| GenelD:18971    | Pold1         | 7 | 44,532,744 | 44,548,815 | 16,071 - | 3 |
| GenelD:22260    | Nr1h2         | 7 | 44,549,632 | 44,553,923 | 4,291 -  | 3 |
| GenelD:107503   | Atf5          | 7 | 44,812,256 | 44,816,658 | 4,402 -  | 1 |
| GenelD:10032858 | Nup62-il4i1   | 7 | 44,816,370 | 44,840,804 | 24,434 + | 1 |
| GenelD:18226    | Nup62         | 7 | 44,816,420 | 44,830,807 | 14,387 + | 1 |
| GenelD:233204   | Tbc1d17       | 7 | 44,840,776 | 44,849,079 | 8,303 -  | 1 |
| GenelD:67605    | Akt1s1        | 7 | 44,849,224 | 44,855,421 | 6,197 +  | 3 |
| GenelD:735269   | Mir707        | 7 | 44,849,699 | 44,849,771 | 72 +     | 1 |
| GenelD:59047    | Pnkp          | 7 | 44,857,181 | 44,862,929 | 5,748 +  | 3 |
| GenelD:84113    | Ptov1         | 7 | 44,863,068 | 44,869,788 | 6,720 -  | 3 |
| GenelD:75613    | Med25         | 7 | 44,879,386 | 44,892,366 | 12,980 - | 1 |
| GenelD:11771    | Ap2a1         | 7 | 44,900,373 | 44,929,490 | 29,117 - | 1 |
| GenelD:75736    | Bcl2l12       | 7 | 44,991,222 | 44,997,579 | 6,357 -  | 1 |
| GenelD:54131    | Irf3          | 7 | 44,997,648 | 45,002,848 | 5,200 +  | 1 |
| GenelD:233208   | Scaf1         | 7 | 45,002,950 | 45,016,249 | 13,299 - | 1 |
| GenelD:20130    | Rras          | 7 | 45,018,007 | 45,021,644 | 3,637 +  | 1 |
| GenelD:233210   | Prr12         | 7 | 45,027,707 | 45,052,881 | 25,174 - | 3 |
| GenelD:65116    | Prrg2         | 7 | 45,053,604 | 45,061,652 | 8,048 -  | 3 |
| GenelD:66394    | Nosip         | 7 | 45,062,429 | 45,078,503 | 16,074 + | 2 |
| GenelD:52377    | Rcn3          | 7 | 45,082,914 | 45,092,213 | 9,299 -  | 1 |
| GenelD:69748    | Aldh16a1      | 7 | 45,141,840 | 45,154,538 | 12,698 - | 1 |
| GenelD:68845    | Pih1d1        | 7 | 45,154,398 | 45,160,064 | 5,666 +  | 1 |
| GenelD:72961    | Slc17a7       | 7 | 45,163,921 | 45,176,139 | 12,218 + | 1 |
| GenelD:381884   | Slc6a16       | 7 | 45,259,154 | 45,273,365 | 14,211 + | 1 |
| GenelD:76713    | 1700039E15Rik | 7 | 45,282,873 | 45,288,993 | 6,120 +  | 1 |
| GenelD:76787    | Ppfia3        | 7 | 45,339,126 | 45,367,019 | 27,893 - | 1 |
| GenelD:50994    | Mtag2         | 7 | 45,366,163 | 45,367,948 | 1,785 +  | 1 |
| GenelD:22342    | Lin7b         | 7 | 45,367,891 | 45,370,564 | 2,673 -  | 1 |
| GenelD:20637    | Snrnp70       | 7 | 45,376,454 | 45,395,647 | 19,193 - | 1 |
| GenelD:16495    | Kcna7         | 7 | 45,405,960 | 45,411,382 | 5,422 +  | 1 |
| GenelD:78405    | Ntf5          | 7 | 45,413,695 | 45,417,179 | 3,484 +  | 1 |
| GenelD:10086221 | LOC100862214  | 7 | 45,418,359 | 45,420,364 | 2,005 +  | 1 |
| GenelD:16866    | Lhb           | 7 | 45,420,946 | 45,421,854 | 908 +    | 1 |
| GenelD:20174    | Ruvbl2        | 7 | 45,421,898 | 45,434,464 | 12,566 - | 2 |
| GenelD:14936    | Gys1          | 7 | 45,434,839 | 45,456,617 | 21,778 + | 1 |
| GenelD:12348    | Car11         | 7 | 45,699,967 | 45,704,671 | 4,704 +  | 2 |

|                 |               |   |            |            |           |   |
|-----------------|---------------|---|------------|------------|-----------|---|
| GenelD:13170    | Dbp           | 7 | 45,705,247 | 45,710,203 | 4,956 +   | 3 |
| GenelD:56632    | Sphk2         | 7 | 45,709,463 | 45,718,002 | 8,539 -   | 3 |
| GenelD:19899    | Rpl18         | 7 | 45,718,071 | 45,720,835 | 2,764 +   | 1 |
| GenelD:73813    | Fam83e        | 7 | 45,721,220 | 45,729,492 | 8,272 +   | 1 |
| GenelD:69363    | Spaca4        | 7 | 45,725,107 | 45,725,816 | 709 -     | 1 |
| GenelD:545963   | Gm5897        | 7 | 45,783,122 | 45,783,551 | 429 -     | 1 |
| GenelD:381983   | Lmtk3         | 7 | 45,783,947 | 45,804,130 | 20,183 +  | 3 |
| GenelD:19158    | Cyth2         | 7 | 45,806,637 | 45,814,316 | 7,679 -   | 2 |
| GenelD:211480   | Kcnj14        | 7 | 45,816,467 | 45,824,747 | 8,280 -   | 2 |
| GenelD:101612   | Grwd1         | 7 | 45,825,223 | 45,830,789 | 5,566 -   | 1 |
| GenelD:14814    | Grin2d        | 7 | 45,832,483 | 45,866,681 | 34,198 -  | 2 |
| GenelD:68137    | Kdelr1        | 7 | 45,872,840 | 45,883,726 | 10,886 +  | 1 |
| GenelD:70209    | Tmem143       | 7 | 45,897,069 | 45,917,413 | 20,344 +  | 1 |
| GenelD:13732    | Emp3          | 7 | 45,918,023 | 45,921,426 | 3,403 -   | 1 |
| GenelD:27421    | Abcc6         | 7 | 45,976,380 | 46,030,286 | 53,906 -  | 1 |
| GenelD:211548   | Nomo1         | 7 | 46,033,696 | 46,084,212 | 50,516 +  | 1 |
| GenelD:17927    | Myod1         | 7 | 46,376,474 | 46,379,092 | 2,618 +   | 1 |
| GenelD:246694   | Hps5          | 7 | 46,760,466 | 46,795,881 | 35,415 -  | 1 |
| GenelD:14884    | Gtf2h1        | 7 | 46,796,094 | 46,823,800 | 27,706 +  | 1 |
| GenelD:384622   | Gm5331        | 7 | 46,832,464 | 46,839,328 | 6,864 +   | 1 |
| GenelD:16828    | Ldha          | 7 | 46,845,804 | 46,855,627 | 9,823 +   | 1 |
| GenelD:22088    | Tsg101        | 7 | 46,889,027 | 46,919,930 | 30,903 -  | 1 |
| GenelD:54122    | Uevld         | 7 | 46,923,216 | 46,958,518 | 35,302 -  | 2 |
| GenelD:97402    | C86187        | 7 | 46,967,747 | 46,975,911 | 8,164 -   | 1 |
| GenelD:101685   | Spty2d1       | 7 | 46,990,396 | 47,008,414 | 18,018 -  | 1 |
| GenelD:67893    | Tmem86a       | 7 | 47,050,640 | 47,054,776 | 4,136 +   | 1 |
| GenelD:108961   | E2f8          | 7 | 48,866,429 | 48,881,041 | 14,612 -  | 1 |
| GenelD:10004046 | Gm2788        | 7 | 48,880,640 | 48,886,608 | 5,968 +   | 1 |
| GenelD:78286    | Nav2          | 7 | 48,959,073 | 49,610,088 | 651,015 + | 1 |
| GenelD:53415    | Htati2        | 7 | 49,759,106 | 49,773,999 | 14,893 +  | 1 |
| GenelD:71974    | Prmt3         | 7 | 49,778,358 | 49,858,265 | 79,907 +  | 1 |
| GenelD:20430    | Cyfip1        | 7 | 55,842,071 | 55,932,633 | 90,562 +  | 1 |
| GenelD:93790    | Nipa2         | 7 | 55,931,266 | 55,962,493 | 31,227 -  | 1 |
| GenelD:320845   | A230056P14Rik | 7 | 55,962,531 | 55,980,096 | 17,565 +  | 1 |
| GenelD:110886   | Gabra5        | 7 | 57,407,669 | 57,510,009 | 102,340 - | 1 |
| GenelD:11982    | Atp10a        | 7 | 58,658,202 | 58,829,426 | 171,224 + | 1 |
| GenelD:22215    | Ube3a         | 7 | 59,228,750 | 59,306,727 | 77,977 +  | 1 |
| GenelD:22652    | Mkrn3         | 7 | 62,417,593 | 62,420,139 | 2,546 -   | 1 |
| GenelD:27412    | Peg12         | 7 | 62,461,871 | 62,464,510 | 2,639 -   | 1 |
| GenelD:50794    | Klf13         | 7 | 63,886,351 | 63,938,915 | 52,564 -  | 1 |
| GenelD:70638    | Fam189a1      | 7 | 64,756,096 | 65,156,528 | 400,432 - | 2 |
| GenelD:66647    | Ndn12         | 7 | 64,871,650 | 64,873,040 | 1,390 -   | 1 |
| GenelD:665234   | Gm7546        | 7 | 65,579,999 | 65,635,854 | 55,855 -  | 1 |
| GenelD:272396   | Tarsl2        | 7 | 65,644,898 | 65,692,093 | 47,195 +  | 2 |
| GenelD:68634    | Tm2d3         | 7 | 65,693,417 | 65,701,913 | 8,496 +   | 1 |
| GenelD:18553    | Pcsk6         | 7 | 65,862,136 | 66,050,386 | 188,250 + | 1 |
| GenelD:68981    | Snrpa1        | 7 | 66,060,336 | 66,074,587 | 14,251 +  | 2 |

|                 |               |   |            |            |           |   |
|-----------------|---------------|---|------------|------------|-----------|---|
| GenelD:109815   | Vimp          | 7 | 66,079,649 | 66,089,405 | 9,756 +   | 1 |
| GenelD:269941   | Chsy1         | 7 | 66,109,515 | 66,173,798 | 64,283 +  | 1 |
| GenelD:233328   | Lrrk1         | 7 | 66,258,745 | 66,388,341 | 129,596 - | 1 |
| GenelD:56847    | Aldh1a3       | 7 | 66,390,892 | 66,427,477 | 36,585 -  | 2 |
| GenelD:233332   | Adamts17      | 7 | 66,839,735 | 67,152,625 | 312,890 + | 1 |
| GenelD:17258    | Mef2a         | 7 | 67,233,824 | 67,372,858 | 139,034 - | 2 |
| GenelD:233335   | Sym           | 7 | 67,730,161 | 67,759,742 | 29,581 -  | 1 |
| GenelD:16001    | Igf1r         | 7 | 67,952,257 | 68,233,667 | 281,410 + | 2 |
| GenelD:66412    | Arrdc4        | 7 | 68,736,994 | 68,749,238 | 12,244 -  | 1 |
| GenelD:11819    | Nr2f2         | 7 | 70,351,950 | 70,366,746 | 14,796 -  | 5 |
| GenelD:434198   | B130024G19Rik | 7 | 70,365,383 | 70,411,146 | 45,763 +  | 3 |
| GenelD:319783   | A730056A06Rik | 7 | 73,313,806 | 73,375,774 | 61,968 -  | 1 |
| GenelD:244058   | Rgma          | 7 | 73,375,520 | 73,419,899 | 44,379 +  | 2 |
| GenelD:69170    | 1810026B05Rik | 7 | 73,539,798 | 73,558,395 | 18,597 -  | 1 |
| GenelD:665610   | Gm7710        | 7 | 73,617,858 | 73,618,383 | 525 -     | 1 |
| GenelD:10003834 | Fam174b       | 7 | 73,740,307 | 73,776,919 | 36,612 +  | 1 |
| GenelD:20450    | St8sia2       | 7 | 73,939,119 | 74,013,682 | 74,563 -  | 1 |
| GenelD:108116   | Slco3a1       | 7 | 74,275,418 | 74,554,780 | 279,362 - | 1 |
| GenelD:75547    | Akap13        | 7 | 75,455,534 | 75,754,609 | 299,075 + | 1 |
| GenelD:723884   | Mir7-2        | 7 | 78,888,277 | 78,888,373 | 96 +      | 1 |
| GenelD:68048    | Aen           | 7 | 78,895,927 | 78,908,833 | 12,906 +  | 1 |
| GenelD:54608    | Abhd2         | 7 | 79,273,266 | 79,361,601 | 88,335 +  | 1 |
| GenelD:18975    | Polg          | 7 | 79,449,383 | 79,466,273 | 16,890 -  | 1 |
| GenelD:10003847 | Gm10616       | 7 | 79,466,409 | 79,468,536 | 2,127 +   | 1 |
| GenelD:77011    | Ticrr         | 7 | 79,660,196 | 79,698,148 | 37,952 +  | 1 |
| GenelD:16576    | Kif7          | 7 | 79,698,098 | 79,714,186 | 16,088 -  | 1 |
| GenelD:103968   | Plin1         | 7 | 79,721,164 | 79,732,776 | 11,612 -  | 1 |
| GenelD:209225   | Zfp710        | 7 | 80,024,814 | 80,092,751 | 67,937 +  | 3 |
| GenelD:10085996 | Gm21057       | 7 | 80,062,710 | 80,075,257 | 12,547 -  | 1 |
| GenelD:269951   | Idh2          | 7 | 80,094,846 | 80,115,350 | 20,504 -  | 1 |
| GenelD:20352    | Sema4b        | 7 | 80,186,841 | 80,226,524 | 39,683 +  | 3 |
| GenelD:23991    | Cib1          | 7 | 80,227,160 | 80,232,616 | 5,456 -   | 1 |
| GenelD:269952   | Gdpgp1        | 7 | 80,232,893 | 80,241,420 | 8,527 +   | 1 |
| GenelD:269954   | Ttll13        | 7 | 80,246,376 | 80,260,821 | 14,445 +  | 1 |
| GenelD:83485    | Ngrn          | 7 | 80,261,215 | 80,265,378 | 4,163 +   | 1 |
| GenelD:233405   | Vps33b        | 7 | 80,269,655 | 80,291,579 | 21,924 +  | 2 |
| GenelD:233406   | Prc1          | 7 | 80,294,465 | 80,316,259 | 21,794 +  | 1 |
| GenelD:101869   | Unc45a        | 7 | 80,325,292 | 80,340,219 | 14,927 -  | 1 |
| GenelD:68695    | Hddc3         | 7 | 80,343,137 | 80,346,097 | 2,960 +   | 1 |
| GenelD:140481   | Man2a2        | 7 | 80,349,097 | 80,371,375 | 22,278 -  | 3 |
| GenelD:14159    | Fes           | 7 | 80,377,758 | 80,387,946 | 10,188 -  | 1 |
| GenelD:18550    | Furin         | 7 | 80,389,194 | 80,405,431 | 16,237 -  | 2 |
| GenelD:70461    | Crtc3         | 7 | 80,586,632 | 80,688,877 | 102,245 - | 1 |
| GenelD:29875    | Iqgap1        | 7 | 80,711,583 | 80,803,331 | 91,748 -  | 1 |
| GenelD:22691    | Zscan2        | 7 | 80,862,108 | 80,876,514 | 14,406 +  | 2 |
| GenelD:233410   | Zfp592        | 7 | 80,993,684 | 81,045,162 | 51,478 +  | 1 |
| GenelD:18584    | Pde8a         | 7 | 81,213,804 | 81,333,622 | 119,818 + | 2 |



|                 |               |   |            |            |           |   |
|-----------------|---------------|---|------------|------------|-----------|---|
| GenelD:20068    | Rps17         | 7 | 81,342,733 | 81,345,234 | 2,501 -   | 1 |
| GenelD:12877    | Cpeb1         | 7 | 81,347,026 | 81,454,758 | 107,732 - | 2 |
| GenelD:11775    | Ap3b2         | 7 | 81,460,399 | 81,493,925 | 33,526 -  | 1 |
| GenelD:244091   | Fsd2          | 7 | 81,534,354 | 81,566,981 | 32,627 -  | 1 |
| GenelD:434204   | Whamm         | 7 | 81,571,292 | 81,596,836 | 25,544 +  | 1 |
| GenelD:67148    | Fam103a1      | 7 | 81,762,953 | 81,769,490 | 6,537 +   | 1 |
| GenelD:83962    | Btbd1         | 7 | 81,792,074 | 81,829,431 | 37,357 -  | 1 |
| GenelD:107769   | Tm6sf1        | 7 | 81,859,022 | 81,884,068 | 25,046 +  | 1 |
| GenelD:29877    | Hdgfrp3       | 7 | 81,881,256 | 81,934,459 | 53,203 -  | 1 |
| GenelD:12173    | Bnc1          | 7 | 81,966,662 | 81,992,299 | 25,637 -  | 1 |
| GenelD:330577   | Fam154b       | 7 | 82,632,960 | 82,648,528 | 15,568 -  | 1 |
| GenelD:101592   | Eftud1        | 7 | 82,648,614 | 82,777,852 | 129,238 + | 1 |
| GenelD:619808   | 1700010L04Rik | 7 | 82,851,599 | 82,859,849 | 8,250 +   | 1 |
| GenelD:108797   | Mex3b         | 7 | 82,867,333 | 82,871,576 | 4,243 +   | 1 |
| GenelD:80889    | Mesdc1        | 7 | 83,880,495 | 83,884,341 | 3,846 -   | 1 |
| GenelD:67943    | Mesdc2        | 7 | 83,892,000 | 83,901,532 | 9,532 +   | 1 |
| GenelD:70178    | Abhd17c       | 7 | 84,109,356 | 84,151,893 | 42,537 -  | 1 |
| GenelD:10003923 | Gm2115        | 7 | 84,528,954 | 84,578,339 | 49,385 +  | 1 |
| GenelD:14366    | Fzd4          | 7 | 89,404,366 | 89,410,110 | 5,744 +   | 1 |
| GenelD:78329    | 2310010J17Rik | 7 | 90,124,836 | 90,129,936 | 5,100 -   | 1 |
| GenelD:233489   | Picalm        | 7 | 90,130,232 | 90,209,447 | 79,215 +  | 1 |
| GenelD:233490   | Crebzf        | 7 | 90,442,781 | 90,447,721 | 4,940 +   | 1 |
| GenelD:66271    | Tmem126a      | 7 | 90,450,712 | 90,457,208 | 6,496 -   | 1 |
| GenelD:73845    | Ankrd42       | 7 | 92,584,183 | 92,637,142 | 52,959 -  | 1 |
| GenelD:74737    | Pcf11         | 7 | 92,643,712 | 92,669,912 | 26,200 -  | 2 |
| GenelD:58238    | Fam181b       | 7 | 93,079,879 | 93,081,722 | 1,843 +   | 1 |
| GenelD:23966    | Tenm4         | 7 | 96,210,637 | 96,908,554 | 697,917 + | 1 |
| GenelD:14389    | Gab2          | 7 | 97,081,751 | 97,308,951 | 227,200 + | 1 |
| GenelD:244144   | Usp35         | 7 | 97,309,380 | 97,325,964 | 16,584 -  | 1 |
| GenelD:622320   | Kctd21        | 7 | 97,332,323 | 97,350,216 | 17,893 +  | 1 |
| GenelD:66273    | Aamdc         | 7 | 97,550,331 | 97,579,497 | 29,166 -  | 1 |
| GenelD:233532   | Rsf1          | 7 | 97,579,896 | 97,692,782 | 112,886 + | 2 |
| GenelD:10105567 | LOC101055679  | 7 | 97,693,423 | 97,696,621 | 3,198 -   | 1 |
| GenelD:12729    | Clns1a        | 7 | 97,696,657 | 97,720,793 | 24,136 +  | 1 |
| GenelD:17921    | Myo7a         | 7 | 98,051,054 | 98,119,493 | 68,439 -  | 1 |
| GenelD:12337    | Capn5         | 7 | 98,121,565 | 98,178,193 | 56,628 -  | 2 |
| GenelD:330599   | Gm16938       | 7 | 98,177,194 | 98,184,804 | 7,610 +   | 1 |
| GenelD:66190    | Acer3         | 7 | 98,213,660 | 98,309,527 | 95,867 -  | 1 |
| GenelD:244152   | Tsku          | 7 | 98,350,668 | 98,361,328 | 10,660 -  | 1 |
| GenelD:434215   | Lrrc32        | 7 | 98,494,222 | 98,501,831 | 7,609 +   | 1 |
| GenelD:233545   | 2210018M11Rik | 7 | 98,590,594 | 98,656,569 | 65,975 -  | 1 |
| GenelD:22411    | Wnt11         | 7 | 98,838,845 | 98,854,747 | 15,902 +  | 1 |
| GenelD:78610    | Uvrag         | 7 | 98,886,743 | 99,141,144 | 254,401 - | 1 |
| GenelD:67800    | Dgat2         | 7 | 99,153,663 | 99,182,713 | 29,050 -  | 1 |
| GenelD:17760    | Map6          | 7 | 99,267,447 | 99,337,137 | 69,690 +  | 1 |
| GenelD:12406    | Serpinh1      | 7 | 99,345,375 | 99,353,239 | 7,864 -   | 2 |
| GenelD:233552   | Gdpd5         | 7 | 99,381,549 | 99,460,984 | 79,435 +  | 2 |

|                 |               |   |             |             |           |   |
|-----------------|---------------|---|-------------|-------------|-----------|---|
| GenelD:72184    | Klhl35        | 7 | 99,466,004  | 99,474,022  | 8,018 +   | 2 |
| GenelD:27050    | Rps3          | 7 | 99,477,896  | 99,483,709  | 5,813 -   | 2 |
| GenelD:449631   | Snord15b      | 7 | 99,479,563  | 99,479,707  | 144 -     | 1 |
| GenelD:449630   | Snord15a      | 7 | 99,482,785  | 99,482,932  | 147 -     | 1 |
| GenelD:10050338 | Gm4980        | 7 | 99,624,067  | 99,627,103  | 3,036 -   | 1 |
| GenelD:108937   | Rnf169        | 7 | 99,920,254  | 99,980,458  | 60,204 -  | 1 |
| GenelD:67967    | Pold3         | 7 | 100,082,113 | 100,121,500 | 39,387 -  | 1 |
| GenelD:67164    | Lipt2         | 7 | 100,159,277 | 100,160,931 | 1,654 +   | 1 |
| GenelD:70974    | Pgm2l1        | 7 | 100,227,607 | 100,278,872 | 51,265 +  | 1 |
| GenelD:320452   | P4ha3         | 7 | 100,285,520 | 100,319,699 | 34,179 +  | 1 |
| GenelD:22228    | Ucp2          | 7 | 100,493,345 | 100,502,173 | 8,828 +   | 1 |
| GenelD:69387    | Dnajb13       | 7 | 100,503,020 | 100,514,815 | 11,795 -  | 1 |
| GenelD:52443    | Mrpl48        | 7 | 100,549,117 | 100,607,996 | 58,879 -  | 1 |
| GenelD:19346    | Rab6a         | 7 | 100,607,586 | 100,641,268 | 33,682 +  | 1 |
| GenelD:320100   | Relt          | 7 | 100,845,848 | 100,863,413 | 17,565 -  | 1 |
| GenelD:207212   | Arhgef17      | 7 | 100,869,746 | 100,932,161 | 62,415 -  | 2 |
| GenelD:233571   | P2ry6         | 7 | 100,937,634 | 100,964,366 | 26,732 -  | 1 |
| GenelD:207278   | Fchsd2        | 7 | 101,108,775 | 101,284,405 | 175,630 + | 1 |
| GenelD:20480    | Clpb          | 7 | 101,663,768 | 101,790,168 | 126,400 + | 1 |
| GenelD:16332    | Inpp1         | 7 | 101,822,632 | 101,838,226 | 15,594 -  | 2 |
| GenelD:14276    | Folr2         | 7 | 101,839,988 | 101,845,331 | 5,343 -   | 2 |
| GenelD:101706   | Numa1         | 7 | 101,969,843 | 102,014,959 | 45,116 +  | 1 |
| GenelD:269966   | Nup98         | 7 | 102,134,203 | 102,210,120 | 75,917 -  | 1 |
| GenelD:56212    | Rhog          | 7 | 102,239,123 | 102,250,118 | 10,995 -  | 2 |
| GenelD:20866    | Stim1         | 7 | 102,267,824 | 102,436,860 | 169,036 + | 1 |
| GenelD:11785    | Apbb1         | 7 | 105,558,465 | 105,581,653 | 23,188 -  | 1 |
| GenelD:15458    | Hpx           | 7 | 105,591,611 | 105,600,116 | 8,505 -   | 1 |
| GenelD:14356    | Timm10b       | 7 | 105,640,540 | 105,641,846 | 1,306 +   | 1 |
| GenelD:101867   | Rrp8          | 7 | 105,731,730 | 105,737,385 | 5,655 -   | 2 |
| GenelD:16202    | Ilk           | 7 | 105,736,590 | 105,742,925 | 6,335 +   | 2 |
| GenelD:24075    | Taf10         | 7 | 105,742,894 | 105,744,338 | 1,444 -   | 2 |
| GenelD:12751    | Tpp1          | 7 | 105,744,847 | 105,752,207 | 7,360 -   | 3 |
| GenelD:233651   | Dchs1         | 7 | 105,752,989 | 105,787,550 | 34,561 -  | 2 |
| GenelD:27397    | Mrpl17        | 7 | 105,803,782 | 105,811,087 | 7,305 -   | 1 |
| GenelD:244202   | Nlrp10        | 7 | 108,921,853 | 108,930,158 | 8,305 -   | 1 |
| GenelD:66085    | Eif3f         | 7 | 108,934,415 | 108,941,942 | 7,527 +   | 1 |
| GenelD:117229   | Stk33         | 7 | 109,279,216 | 109,439,053 | 159,837 - | 1 |
| GenelD:74293    | 1700095J03Rik | 7 | 109,438,618 | 109,444,895 | 6,277 +   | 1 |
| GenelD:330627   | Trim66        | 7 | 109,449,001 | 109,508,134 | 59,133 -  | 1 |
| GenelD:26451    | Rpl27a        | 7 | 109,519,195 | 109,522,369 | 3,174 +   | 1 |
| GenelD:10030249 | Snora3        | 7 | 109,520,132 | 109,520,251 | 119 +     | 1 |
| GenelD:76954    | St5           | 7 | 109,523,911 | 109,617,147 | 93,236 -  | 1 |
| GenelD:56786    | Tmem9b        | 7 | 109,735,836 | 109,752,263 | 16,427 -  | 1 |
| GenelD:73886    | 4930431P19Rik | 7 | 109,752,320 | 109,755,278 | 2,958 +   | 1 |
| GenelD:78593    | Nrip3         | 7 | 109,758,056 | 109,781,545 | 23,489 -  | 1 |
| GenelD:233726   | Ipo7          | 7 | 110,018,425 | 110,055,114 | 36,689 +  | 1 |
| GenelD:22390    | Wee1          | 7 | 110,122,059 | 110,143,299 | 21,240 +  | 1 |

|                 |               |   |             |             |           |   |
|-----------------|---------------|---|-------------|-------------|-----------|---|
| GenelD:20947    | Swap70        | 7 | 110,221,703 | 110,283,506 | 61,803 +  | 1 |
| GenelD:11717    | Ampd3         | 7 | 110,772,604 | 110,812,395 | 39,791 +  | 1 |
| GenelD:67150    | Rnf141        | 7 | 110,816,535 | 110,844,381 | 27,846 -  | 1 |
| GenelD:114332   | Lyve1         | 7 | 110,850,607 | 110,862,953 | 12,346 -  | 1 |
| GenelD:22083    | Ctr9          | 7 | 111,028,951 | 111,056,377 | 27,426 +  | 1 |
| GenelD:13690    | Eif4g2        | 7 | 111,067,985 | 111,083,030 | 15,045 -  | 1 |
| GenelD:10004267 | Gm3960        | 7 | 112,021,903 | 112,023,408 | 1,505 -   | 1 |
| GenelD:74996    | Usp47         | 7 | 112,023,506 | 112,111,386 | 87,880 +  | 1 |
| GenelD:320878   | Mical2        | 7 | 112,225,836 | 112,355,194 | 129,358 + | 1 |
| GenelD:57342    | Parva         | 7 | 112,427,706 | 112,591,688 | 163,982 + | 1 |
| GenelD:69625    | 2310014F06Rik | 7 | 112,665,558 | 112,680,081 | 14,523 -  | 2 |
| GenelD:21676    | Tead1         | 7 | 112,679,320 | 112,906,805 | 227,485 + | 2 |
| GenelD:68815    | Btbd10        | 7 | 113,315,644 | 113,369,339 | 53,695 -  | 1 |
| GenelD:67420    | Far1          | 7 | 113,513,862 | 113,570,458 | 56,596 +  | 1 |
| GenelD:66922    | Rras2         | 7 | 114,046,782 | 114,117,781 | 70,999 -  | 1 |
| GenelD:70349    | Copb1         | 7 | 114,215,559 | 114,254,680 | 39,121 -  | 1 |
| GenelD:26440    | Psma1         | 7 | 114,264,550 | 114,276,116 | 11,566 -  | 2 |
| GenelD:71045    | 4933406I18Rik | 7 | 114,315,479 | 114,415,161 | 99,682 -  | 1 |
| GenelD:18576    | Pde3b         | 7 | 114,415,254 | 114,537,937 | 122,683 + | 1 |
| GenelD:18704    | Pik3c2a       | 7 | 116,337,276 | 116,443,458 | 106,182 - | 1 |
| GenelD:267019   | Rps15a        | 7 | 118,104,374 | 118,116,147 | 11,773 -  | 1 |
| GenelD:54208    | Arl6ip1       | 7 | 118,118,890 | 118,129,625 | 10,735 -  | 2 |
| GenelD:233789   | Smg1          | 7 | 118,131,312 | 118,243,637 | 112,325 - | 2 |
| GenelD:67745    | 4930583K01Rik | 7 | 118,243,907 | 118,245,551 | 1,644 +   | 1 |
| GenelD:110058   | Syt17         | 7 | 118,381,856 | 118,443,552 | 61,696 -  | 1 |
| GenelD:319622   | Itpripl2      | 7 | 118,485,111 | 118,491,975 | 6,864 -   | 1 |
| GenelD:56209    | Gde1          | 7 | 118,688,558 | 118,705,738 | 17,180 -  | 1 |
| GenelD:101565   | Ccp110        | 7 | 118,712,611 | 118,737,019 | 24,408 +  | 1 |
| GenelD:66356    | Knop1         | 7 | 118,842,217 | 118,855,998 | 13,781 -  | 1 |
| GenelD:434232   | Iqck          | 7 | 118,855,775 | 118,972,652 | 116,877 + | 1 |
| GenelD:64297    | Gprc5b        | 7 | 118,972,040 | 118,995,211 | 23,171 -  | 1 |
| GenelD:233805   | Dcun1d3       | 7 | 119,853,163 | 119,895,745 | 42,582 -  | 1 |
| GenelD:73919    | Lym1          | 7 | 119,896,292 | 119,916,750 | 20,458 +  | 1 |
| GenelD:67003    | Uqcr2         | 7 | 120,635,189 | 120,659,523 | 24,334 +  | 1 |
| GenelD:436008   | Gm5737        | 7 | 120,812,365 | 120,831,193 | 18,828 +  | 1 |
| GenelD:13631    | Eef2k         | 7 | 120,842,831 | 120,907,219 | 64,388 +  | 2 |
| GenelD:26939    | Polr3e        | 7 | 120,917,744 | 120,947,432 | 29,688 +  | 1 |
| GenelD:12585    | Cdr2          | 7 | 120,957,036 | 120,982,312 | 25,276 -  | 1 |
| GenelD:74466    | 4933427G17Rik | 7 | 120,982,509 | 121,014,787 | 32,278 +  | 1 |
| GenelD:59052    | Mettl9        | 7 | 121,034,445 | 121,076,835 | 42,390 +  | 1 |
| GenelD:76179    | Usp31         | 7 | 121,642,021 | 121,707,253 | 65,232 -  | 1 |
| GenelD:233824   | Cog7          | 7 | 121,922,839 | 121,981,693 | 58,854 -  | 1 |
| GenelD:74105    | Gga2          | 7 | 121,986,722 | 122,021,198 | 34,476 -  | 1 |
| GenelD:67417    | Ears2         | 7 | 122,038,821 | 122,067,063 | 28,242 -  | 1 |
| GenelD:28018    | Ubfd1         | 7 | 122,067,198 | 122,082,199 | 15,001 +  | 1 |
| GenelD:233826   | Palb2         | 7 | 122,107,265 | 122,132,946 | 25,681 -  | 1 |
| GenelD:59288    | Dctn5         | 7 | 122,133,041 | 122,149,044 | 16,003 +  | 2 |

|                 |               |   |             |             |           |   |
|-----------------|---------------|---|-------------|-------------|-----------|---|
| GenelD:18817    | Plk1          | 7 | 122,159,437 | 122,169,875 | 10,438 +  | 1 |
| GenelD:18751    | Prkcb         | 7 | 122,289,125 | 122,634,402 | 345,277 + | 1 |
| GenelD:73951    | 4930413G21Rik | 7 | 122,969,058 | 122,970,459 | 1,401 -   | 1 |
| GenelD:19647    | Rbbp6         | 7 | 122,970,564 | 123,002,572 | 32,008 +  | 1 |
| GenelD:233833   | Tnrc6a        | 7 | 123,123,885 | 123,195,296 | 71,411 +  | 1 |
| GenelD:233863   | Gtf3c1        | 7 | 125,640,954 | 125,707,688 | 66,734 -  | 1 |
| GenelD:233865   | D430042O09Rik | 7 | 125,707,876 | 125,874,797 | 166,921 + | 1 |
| GenelD:269994   | Gsg1l         | 7 | 125,878,419 | 126,082,411 | 203,992 - | 1 |
| GenelD:74204    | Xpo6          | 7 | 126,101,718 | 126,200,408 | 98,690 -  | 1 |
| GenelD:104175   | Sbk1          | 7 | 126,272,619 | 126,294,999 | 22,380 +  | 1 |
| GenelD:70314    | Rabep2        | 7 | 126,428,767 | 126,445,907 | 17,140 +  | 1 |
| GenelD:233870   | Tufm          | 7 | 126,487,355 | 126,490,731 | 3,376 +   | 1 |
| GenelD:233871   | Atxn2l        | 7 | 126,491,708 | 126,503,302 | 11,594 -  | 2 |
| GenelD:56347    | Eif3c         | 7 | 126,546,911 | 126,566,366 | 19,455 -  | 1 |
| GenelD:12752    | Cln3          | 7 | 126,571,400 | 126,584,280 | 12,880 -  | 1 |
| GenelD:75764    | Slx1b         | 7 | 126,688,927 | 126,695,783 | 6,856 -   | 1 |
| GenelD:66162    | Bola2         | 7 | 126,696,000 | 126,696,693 | 693 +     | 1 |
| GenelD:12721    | Coro1a        | 7 | 126,699,774 | 126,704,754 | 4,980 -   | 1 |
| GenelD:26417    | Mapk3         | 7 | 126,759,626 | 126,765,816 | 6,190 +   | 1 |
| GenelD:68616    | Gdpd3         | 7 | 126,766,414 | 126,775,645 | 9,231 +   | 2 |
| GenelD:66090    | Ypel3         | 7 | 126,776,975 | 126,780,514 | 3,539 +   | 1 |
| GenelD:21389    | Tbx6          | 7 | 126,781,483 | 126,785,548 | 4,065 +   | 2 |
| GenelD:56420    | Ppp4c         | 7 | 126,785,868 | 126,792,471 | 6,603 -   | 3 |
| GenelD:11674    | Aldoa         | 7 | 126,795,234 | 126,800,447 | 5,213 -   | 2 |
| GenelD:233877   | Kctd13        | 7 | 126,928,879 | 126,945,609 | 16,730 +  | 3 |
| GenelD:233879   | Asphd1        | 7 | 126,946,008 | 126,949,581 | 3,573 -   | 2 |
| GenelD:233878   | Sez6l2        | 7 | 126,950,535 | 126,970,606 | 20,071 +  | 3 |
| GenelD:381922   | D830044I16Rik | 7 | 126,972,627 | 126,975,833 | 3,206 -   | 1 |
| GenelD:52858    | Cdipt         | 7 | 126,975,914 | 126,980,501 | 4,587 +   | 1 |
| GenelD:78388    | Mvp           | 7 | 126,986,860 | 127,014,594 | 27,734 -  | 4 |
| GenelD:67278    | Pagr1a        | 7 | 127,015,051 | 127,017,352 | 2,301 -   | 3 |
| GenelD:69017    | Prrt2         | 7 | 127,017,542 | 127,021,211 | 3,669 -   | 3 |
| GenelD:17188    | Maz           | 7 | 127,022,134 | 127,026,479 | 4,345 -   | 3 |
| GenelD:110033   | Kif22         | 7 | 127,027,731 | 127,042,420 | 14,689 -  | 3 |
| GenelD:69036    | Zg16          | 7 | 127,050,156 | 127,051,977 | 1,821 -   | 1 |
| GenelD:68449    | Tbc1d10b      | 7 | 127,197,459 | 127,208,468 | 11,009 -  | 1 |
| GenelD:17907    | Mylpf         | 7 | 127,211,608 | 127,214,287 | 2,679 +   | 1 |
| GenelD:54204    | Sept1         | 7 | 127,214,442 | 127,218,445 | 4,003 -   | 1 |
| GenelD:10004358 | Gm4532        | 7 | 127,232,418 | 127,233,130 | 712 -     | 1 |
| GenelD:233887   | Zfp553        | 7 | 127,233,443 | 127,237,861 | 4,418 +   | 2 |
| GenelD:244216   | Zfp771        | 7 | 127,244,526 | 127,254,801 | 10,275 +  | 1 |
| GenelD:20768    | Sephs2        | 7 | 127,271,879 | 127,274,059 | 2,180 -   | 1 |
| GenelD:16408    | Itgal         | 7 | 127,296,260 | 127,335,137 | 38,877 +  | 1 |
| GenelD:233890   | Zfp768        | 7 | 127,342,795 | 127,345,314 | 2,519 -   | 1 |
| GenelD:71131    | Zfp689        | 7 | 127,442,136 | 127,449,158 | 7,022 -   | 1 |
| GenelD:233895   | Prr14         | 7 | 127,471,614 | 127,476,758 | 5,144 +   | 1 |
| GenelD:629159   | 1700008J07Rik | 7 | 127,510,438 | 127,512,869 | 2,431 -   | 1 |

|                 |               |   |             |             |           |   |
|-----------------|---------------|---|-------------|-------------|-----------|---|
| GenelD:10004359 | Srcap         | 7 | 127,511,983 | 127,565,271 | 53,288 +  | 1 |
| GenelD:233900   | Rnf40         | 7 | 127,588,698 | 127,603,605 | 14,907 +  | 1 |
| GenelD:68232    | 1700120K04Rik | 7 | 127,603,903 | 127,604,445 | 542 -     | 2 |
| GenelD:320683   | Zfp629        | 7 | 127,607,035 | 127,614,433 | 7,398 -   | 2 |
| GenelD:12055    | Bcl7c         | 7 | 127,704,978 | 127,708,766 | 3,788 -   | 1 |
| GenelD:791073   | Mir762        | 7 | 127,708,487 | 127,708,562 | 75 +      | 1 |
| GenelD:13019    | Ctf1          | 7 | 127,712,736 | 127,718,185 | 5,449 +   | 1 |
| GenelD:244218   | Ctf2          | 7 | 127,718,960 | 127,725,616 | 6,656 -   | 1 |
| GenelD:233902   | Fbxl19        | 7 | 127,746,775 | 127,768,928 | 22,153 +  | 2 |
| GenelD:269999   | Orai3         | 7 | 127,769,815 | 127,775,150 | 5,335 +   | 1 |
| GenelD:233904   | Setd1a        | 7 | 127,777,389 | 127,800,122 | 22,733 +  | 1 |
| GenelD:20909    | Stx4a         | 7 | 127,841,808 | 127,848,979 | 7,171 +   | 1 |
| GenelD:244219   | Zfp668        | 7 | 127,865,359 | 127,876,823 | 11,464 -  | 1 |
| GenelD:233905   | Zfp646        | 7 | 127,877,701 | 127,885,996 | 8,295 +   | 1 |
| GenelD:330657   | Prss53        | 7 | 127,885,444 | 127,890,970 | 5,526 -   | 1 |
| GenelD:77613    | Prss36        | 7 | 127,932,638 | 127,946,725 | 14,087 -  | 1 |
| GenelD:233913   | BC017158      | 7 | 128,271,379 | 128,298,131 | 26,752 -  | 1 |
| GenelD:10052655 | Mir3103       | 7 | 128,288,369 | 128,288,435 | 66 -      | 1 |
| GenelD:67865    | Rgs10         | 7 | 128,373,625 | 128,418,172 | 44,547 -  | 1 |
| GenelD:29810    | Bag3          | 7 | 128,523,583 | 128,546,981 | 23,398 +  | 1 |
| GenelD:210711   | Mcmbp         | 7 | 128,696,441 | 128,740,429 | 43,988 -  | 2 |
| GenelD:207352   | Sec23ip       | 7 | 128,744,870 | 128,784,836 | 39,966 +  | 2 |
| GenelD:14183    | Fgfr2         | 7 | 130,162,451 | 130,266,808 | 104,357 - | 1 |
| GenelD:11907    | Ate1          | 7 | 130,391,493 | 130,519,961 | 128,468 - | 1 |
| GenelD:67872    | Nsmce4a       | 7 | 130,532,526 | 130,547,381 | 14,855 -  | 1 |
| GenelD:57752    | Tacc2         | 7 | 130,577,484 | 130,764,784 | 187,300 + | 2 |
| GenelD:434249   | Gm5602        | 7 | 130,861,285 | 130,866,324 | 5,039 -   | 1 |
| GenelD:101476   | Plekha1       | 7 | 130,865,910 | 130,913,302 | 47,392 +  | 1 |
| GenelD:56213    | Htra1         | 7 | 130,936,203 | 130,985,658 | 49,455 +  | 1 |
| GenelD:68277    | 2310057M21Rik | 7 | 131,342,718 | 131,362,698 | 19,980 -  | 2 |
| GenelD:214580   | Pstk          | 7 | 131,371,146 | 131,387,839 | 16,693 +  | 2 |
| GenelD:67143    | Ikzf5         | 7 | 131,388,649 | 131,410,478 | 21,829 -  | 1 |
| GenelD:66885    | Acadsb        | 7 | 131,410,601 | 131,446,211 | 35,610 +  | 1 |
| GenelD:15372    | Hmx2          | 7 | 131,554,062 | 131,556,582 | 2,520 +   | 1 |
| GenelD:12237    | Bub3          | 7 | 131,560,391 | 131,571,898 | 11,507 +  | 1 |
| GenelD:233919   | Gpr26         | 7 | 131,966,460 | 131,985,633 | 19,173 +  | 1 |
| GenelD:77590    | Chst15        | 7 | 132,236,255 | 132,317,155 | 80,900 -  | 1 |
| GenelD:10050293 | Gm19463       | 7 | 132,314,912 | 132,316,219 | 1,307 -   | 1 |
| GenelD:10004368 | Gm10584       | 7 | 132,315,664 | 132,318,291 | 2,627 +   | 1 |
| GenelD:77938    | Fam53b        | 7 | 132,712,084 | 132,813,196 | 101,112 - | 1 |
| GenelD:76683    | 1500002F19Rik | 7 | 132,874,629 | 132,931,197 | 56,568 -  | 1 |
| GenelD:13017    | Ctbp2         | 7 | 132,987,011 | 133,123,483 | 136,472 - | 2 |
| GenelD:74970    | 4930483O08Rik | 7 | 133,128,251 | 133,142,457 | 14,206 +  | 2 |
| GenelD:214764   | 2700050L05Rik | 7 | 133,637,675 | 133,673,017 | 35,342 +  | 1 |
| GenelD:22276    | Uros          | 7 | 133,686,330 | 133,709,295 | 22,965 -  | 1 |
| GenelD:66165    | Bccip         | 7 | 133,709,333 | 133,721,145 | 11,812 +  | 1 |
| GenelD:101437   | Dhx32         | 7 | 133,720,935 | 133,776,803 | 55,868 -  | 1 |

|                 |               |   |             |             |           |   |
|-----------------|---------------|---|-------------|-------------|-----------|---|
| GenelD:66930    | Fank1         | 7 | 133,776,891 | 133,881,532 | 104,641 + | 1 |
| GenelD:330662   | Dock1         | 7 | 134,670,687 | 135,173,647 | 502,960 + | 1 |
| GenelD:212070   | Clrn3         | 7 | 135,511,456 | 135,528,654 | 17,198 -  | 1 |
| GenelD:19267    | Ptpre         | 7 | 135,537,824 | 135,686,294 | 148,470 + | 2 |
| GenelD:17345    | Mki67         | 7 | 135,689,788 | 135,716,379 | 26,591 -  | 1 |
| GenelD:13593    | Ebf3          | 7 | 137,193,671 | 137,314,445 | 120,774 - | 1 |
| GenelD:30926    | Glr3          | 7 | 137,437,648 | 137,468,594 | 30,946 +  | 1 |
| GenelD:69546    | Mapk1ip1      | 7 | 138,835,818 | 138,846,267 | 10,449 -  | 1 |
| GenelD:52432    | Ppp2r2d       | 7 | 138,846,386 | 138,883,057 | 36,671 +  | 1 |
| GenelD:74004    | Jakmip3       | 7 | 139,062,607 | 139,083,976 | 21,369 +  | 1 |
| GenelD:26757    | Dpysl4        | 7 | 139,086,001 | 139,101,795 | 15,794 +  | 1 |
| GenelD:76612    | Lrrc27        | 7 | 139,212,988 | 139,242,973 | 29,985 +  | 1 |
| GenelD:101631   | Pwwp2b        | 7 | 139,248,482 | 139,267,253 | 18,771 +  | 1 |
| GenelD:212111   | Inpp5a        | 7 | 139,389,109 | 139,579,652 | 190,543 + | 1 |
| GenelD:14912    | Nkx6-2        | 7 | 139,579,376 | 139,582,797 | 3,421 -   | 1 |
| GenelD:76484    | Kndc1         | 7 | 139,894,696 | 139,941,540 | 46,844 +  | 1 |
| GenelD:22286    | Utf1          | 7 | 139,943,856 | 139,945,112 | 1,256 +   | 1 |
| GenelD:74237    | Tubgcp2       | 7 | 139,995,955 | 140,036,350 | 40,395 -  | 1 |
| GenelD:69752    | Zfp511        | 7 | 140,036,391 | 140,040,605 | 4,214 +   | 1 |
| GenelD:17703    | Msx3          | 7 | 140,046,157 | 140,049,088 | 2,931 -   | 1 |
| GenelD:212503   | Paox          | 7 | 140,125,685 | 140,134,334 | 8,649 +   | 1 |
| GenelD:212508   | Mtg1          | 7 | 140,137,564 | 140,150,786 | 13,222 +  | 1 |
| GenelD:78520    | C330022C24Rik | 7 | 140,837,221 | 140,845,689 | 8,468 -   | 1 |
| GenelD:338417   | Scgb1c1       | 7 | 140,845,565 | 140,846,769 | 1,204 +   | 1 |
| GenelD:69287    | Odf3          | 7 | 140,847,916 | 140,850,925 | 3,009 +   | 1 |
| GenelD:54399    | Bet1l         | 7 | 140,853,384 | 140,856,383 | 2,999 -   | 1 |
| GenelD:101489   | Ric8          | 7 | 140,857,397 | 140,863,731 | 6,334 +   | 1 |
| GenelD:64384    | Sirt3         | 7 | 140,863,663 | 140,882,309 | 18,646 -  | 2 |
| GenelD:23997    | Psmd13        | 7 | 140,882,394 | 140,898,642 | 16,248 +  | 1 |
| GenelD:15461    | Hras1         | 7 | 141,189,934 | 141,194,004 | 4,070 -   | 3 |
| GenelD:70552    | Lrrc56        | 7 | 141,194,130 | 141,210,055 | 15,925 +  | 4 |
| GenelD:72000    | 1600016N20Rik | 7 | 141,210,043 | 141,214,080 | 4,037 -   | 1 |
| GenelD:66985    | Rassf7        | 7 | 141,215,860 | 141,218,658 | 2,798 +   | 1 |
| GenelD:387206   | Mir210        | 7 | 141,221,384 | 141,221,493 | 109 -     | 1 |
| GenelD:57754    | Cend1         | 7 | 141,426,451 | 141,429,420 | 2,969 -   | 1 |
| GenelD:68267    | Slc25a22      | 7 | 141,429,749 | 141,437,874 | 8,125 -   | 2 |
| GenelD:57913    | Lrdd          | 7 | 141,438,515 | 141,443,355 | 4,840 -   | 2 |
| GenelD:67186    | Rplp2         | 7 | 141,447,650 | 141,451,342 | 3,692 +   | 3 |
| GenelD:10021741 | Snora52       | 7 | 141,448,803 | 141,448,936 | 133 +     | 2 |
| GenelD:66853    | Pnpla2        | 7 | 141,455,188 | 141,460,743 | 5,555 +   | 3 |
| GenelD:213573   | Efcab4a       | 7 | 141,461,094 | 141,466,602 | 5,508 +   | 3 |
| GenelD:12476    | Cd151         | 7 | 141,467,362 | 141,471,481 | 4,119 +   | 2 |
| GenelD:66491    | Polr2l        | 7 | 141,471,860 | 141,475,153 | 3,293 -   | 3 |
| GenelD:64540    | Tspan4        | 7 | 141,475,236 | 141,493,427 | 18,191 +  | 3 |
| GenelD:11772    | Ap2a2         | 7 | 141,562,180 | 141,633,011 | 70,831 +  | 1 |
| GenelD:18218    | Dusp8         | 7 | 142,079,487 | 142,095,284 | 15,797 -  | 1 |
| GenelD:10004362 | Gm4559        | 7 | 142,273,764 | 142,274,363 | 599 -     | 1 |

|                 |               |   |             |             |           |   |
|-----------------|---------------|---|-------------|-------------|-----------|---|
| GenelD:10003841 | E330027M22Rik | 7 | 142,288,067 | 142,290,418 | 2,351 +   | 1 |
| GenelD:13033    | Ctsd          | 7 | 142,375,916 | 142,387,870 | 11,954 -  | 1 |
| GenelD:19935    | Mrpl23        | 7 | 142,533,117 | 142,540,742 | 7,625 +   | 1 |
| GenelD:16002    | Igf2          | 7 | 142,650,768 | 142,661,035 | 10,267 -  | 1 |
| GenelD:723874   | Mir483        | 7 | 142,654,924 | 142,654,996 | 72 -      | 1 |
| GenelD:111975   | Igf2as        | 7 | 142,659,693 | 142,670,356 | 10,663 +  | 1 |
| GenelD:17173    | Ascl2         | 7 | 142,966,822 | 142,969,264 | 2,442 -   | 1 |
| GenelD:97423    | R74862        | 7 | 143,032,621 | 143,053,368 | 20,747 -  | 1 |
| GenelD:12520    | Cd81          | 7 | 143,052,750 | 143,067,930 | 15,180 +  | 1 |
| GenelD:12577    | Cdkn1c        | 7 | 143,458,339 | 143,461,050 | 2,711 -   | 1 |
| GenelD:17955    | Nap1l4        | 7 | 143,513,579 | 143,549,090 | 35,511 -  | 1 |
| GenelD:27267    | Cars          | 7 | 143,557,230 | 143,600,090 | 42,860 -  | 1 |
| GenelD:13043    | Cttn          | 7 | 144,435,724 | 144,470,935 | 35,211 -  | 1 |
| GenelD:233977   | Ppfia1        | 7 | 144,476,755 | 144,553,729 | 76,974 -  | 1 |
| GenelD:14174    | Fgf3          | 7 | 144,838,612 | 144,843,348 | 4,736 +   | 1 |
| GenelD:12443    | Ccnd1         | 7 | 144,929,931 | 144,939,925 | 9,994 -   | 1 |
| GenelD:10004004 | 1810010D01Rik | 7 | 145,205,818 | 145,208,119 | 2,301 -   | 1 |
| GenelD:319493   | A430078G23Rik | 8 | 3,353,415   | 3,390,299   | 36,884 +  | 1 |
| GenelD:102098   | Arhgef18      | 8 | 3,393,008   | 3,456,600   | 63,592 +  | 1 |
| GenelD:76406    | 1700019B03Rik | 8 | 3,470,862   | 3,487,178   | 16,316 +  | 1 |
| GenelD:140482   | Zfp358        | 8 | 3,493,138   | 3,497,208   | 4,070 +   | 1 |
| GenelD:94178    | Mcoln1        | 8 | 3,500,519   | 3,515,232   | 14,713 +  | 1 |
| GenelD:546049   | C330021F23Rik | 8 | 3,567,998   | 3,584,776   | 16,778 +  | 1 |
| GenelD:10050385 | Gm10186       | 8 | 3,583,752   | 3,584,250   | 498 -     | 1 |
| GenelD:69697    | Camsap3       | 8 | 3,587,450   | 3,609,075   | 21,625 +  | 1 |
| GenelD:69189    | 1810033B17Rik | 8 | 3,665,762   | 3,668,905   | 3,143 +   | 1 |
| GenelD:664858   | BB094273      | 8 | 3,674,035   | 3,687,252   | 13,217 -  | 1 |
| GenelD:66682    | Trappc5       | 8 | 3,676,477   | 3,680,921   | 4,444 +   | 1 |
| GenelD:14128    | Fcer2a        | 8 | 3,681,737   | 3,694,174   | 12,437 -  | 1 |
| GenelD:10004450 | Gm14378       | 8 | 4,248,214   | 4,251,423   | 3,209 +   | 1 |
| GenelD:102209   | Snapc2        | 8 | 4,253,102   | 4,256,220   | 3,118 +   | 1 |
| GenelD:330695   | Ctxn1         | 8 | 4,257,646   | 4,259,274   | 1,628 -   | 1 |
| GenelD:21856    | Timm44        | 8 | 4,259,731   | 4,275,905   | 16,174 -  | 1 |
| GenelD:15568    | Elavl1        | 8 | 4,284,782   | 4,325,100   | 40,318 -  | 1 |
| GenelD:20300    | Ccl25         | 8 | 4,325,210   | 4,360,020   | 34,810 +  | 1 |
| GenelD:665044   | Gm7461        | 8 | 4,677,539   | 4,678,365   | 826 -     | 1 |
| GenelD:20419    | Shcbp1        | 8 | 4,735,980   | 4,779,534   | 43,554 -  | 1 |
| GenelD:13642    | Efnb2         | 8 | 8,617,439   | 8,660,773   | 43,334 -  | 1 |
| GenelD:66719    | 4921522P10Rik | 8 | 8,661,801   | 8,664,728   | 2,927 +   | 1 |
| GenelD:234023   | Arglu1        | 8 | 8,666,576   | 8,690,537   | 23,961 -  | 2 |
| GenelD:384783   | Irs2          | 8 | 10,986,961  | 11,008,430  | 21,469 -  | 3 |
| GenelD:619321   | 9530052E02Rik | 8 | 11,007,850  | 11,054,541  | 46,691 +  | 2 |
| GenelD:12826    | Col4a1        | 8 | 11,198,423  | 11,312,826  | 114,403 - | 1 |
| GenelD:12827    | Col4a2        | 8 | 11,312,829  | 11,449,287  | 136,458 + | 1 |
| GenelD:19332    | Rab20         | 8 | 11,453,977  | 11,478,499  | 24,522 -  | 1 |
| GenelD:102132   | E230013L22Rik | 8 | 11,477,664  | 11,480,241  | 2,577 +   | 1 |
| GenelD:69225    | Carkd         | 8 | 11,497,506  | 11,513,287  | 15,781 +  | 1 |

|                 |               |   |            |            |           |   |
|-----------------|---------------|---|------------|------------|-----------|---|
| GenelD:71941    | Cars2         | 8 | 11,514,017 | 11,550,771 | 36,754 -  | 1 |
| GenelD:26356    | Ing1          | 8 | 11,556,066 | 11,563,250 | 7,184 +   | 1 |
| GenelD:102334   | Ankrd10       | 8 | 11,611,583 | 11,635,754 | 24,171 -  | 1 |
| GenelD:54126    | Arhgef7       | 8 | 11,728,105 | 11,835,219 | 107,114 + | 1 |
| GenelD:259279   | Tubgcp3       | 8 | 12,614,277 | 12,672,100 | 57,823 -  | 1 |
| GenelD:50770    | Atp11a        | 8 | 12,757,016 | 12,868,728 | 111,712 + | 1 |
| GenelD:17207    | Mcf2l         | 8 | 12,915,893 | 13,020,509 | 104,616 + | 1 |
| GenelD:234069   | Pcid2         | 8 | 13,077,525 | 13,105,343 | 27,818 -  | 1 |
| GenelD:99375    | Cul4a         | 8 | 13,105,721 | 13,147,940 | 42,219 +  | 1 |
| GenelD:16783    | Lamp1         | 8 | 13,159,135 | 13,175,338 | 16,203 +  | 1 |
| GenelD:21781    | Tfdp1         | 8 | 13,339,674 | 13,377,702 | 38,028 +  | 1 |
| GenelD:14456    | Gas6          | 8 | 13,465,374 | 13,494,535 | 29,161 -  | 1 |
| GenelD:19414    | Rasa3         | 8 | 13,567,218 | 13,677,587 | 110,369 - | 1 |
| GenelD:69957    | Cdc16         | 8 | 13,757,690 | 13,781,882 | 24,192 +  | 2 |
| GenelD:67031    | Upf3a         | 8 | 13,785,615 | 13,798,538 | 12,923 +  | 1 |
| GenelD:101994   | Zfp828        | 8 | 13,869,641 | 13,881,639 | 11,998 +  | 1 |
| GenelD:66423    | Coprs         | 8 | 13,884,788 | 13,890,271 | 5,483 -   | 1 |
| GenelD:72148    | 2610019F03Rik | 8 | 13,952,008 | 13,974,777 | 22,769 -  | 1 |
| GenelD:234094   | Arhgef10      | 8 | 14,911,717 | 15,001,085 | 89,368 +  | 1 |
| GenelD:74901    | Kbtbd11       | 8 | 15,011,025 | 15,033,333 | 22,308 +  | 2 |
| GenelD:244329   | Mcp1          | 8 | 18,595,173 | 18,803,189 | 208,016 + | 1 |
| GenelD:52123    | Agpat5        | 8 | 18,846,279 | 18,884,413 | 38,134 +  | 1 |
| GenelD:319581   | Xkr5          | 8 | 18,932,729 | 18,950,973 | 18,244 -  | 1 |
| GenelD:11979    | Atp7b         | 8 | 21,994,348 | 22,060,074 | 65,726 -  | 1 |
| GenelD:207958   | Alg11         | 8 | 22,060,721 | 22,071,627 | 10,906 +  | 1 |
| GenelD:80986    | Ckap2         | 8 | 22,168,152 | 22,185,819 | 17,667 -  | 1 |
| GenelD:70160    | Vps36         | 8 | 22,192,860 | 22,218,597 | 25,737 +  | 1 |
| GenelD:102032   | Smim19        | 8 | 22,462,614 | 22,476,879 | 14,265 -  | 1 |
| GenelD:20516    | Slc20a2       | 8 | 22,476,700 | 22,569,616 | 92,916 +  | 1 |
| GenelD:10050293 | Gm17491       | 8 | 22,480,264 | 22,483,332 | 3,068 +   | 1 |
| GenelD:22335    | Vdac3         | 8 | 22,577,075 | 22,593,813 | 16,738 -  | 1 |
| GenelD:64933    | Ap3m2         | 8 | 22,787,354 | 22,805,654 | 18,300 -  | 1 |
| GenelD:244349   | Kat6a         | 8 | 22,859,539 | 22,943,262 | 83,723 +  | 1 |
| GenelD:11733    | Ank1          | 8 | 22,974,882 | 23,150,496 | 175,614 + | 1 |
| GenelD:723876   | Mir486        | 8 | 23,142,555 | 23,142,682 | 127 +     | 1 |
| GenelD:10052651 | Mir3107       | 8 | 23,142,573 | 23,142,662 | 89 -      | 1 |
| GenelD:74561    | Nkx6-3        | 8 | 23,153,271 | 23,158,948 | 5,677 +   | 1 |
| GenelD:102247   | Agpat6        | 8 | 23,172,946 | 23,208,453 | 35,507 -  | 1 |
| GenelD:20377    | Sfrp1         | 8 | 23,411,502 | 23,449,632 | 38,130 +  | 1 |
| GenelD:11502    | Adam9         | 8 | 24,949,611 | 25,016,922 | 67,311 -  | 1 |
| GenelD:69742    | Tm2d2         | 8 | 25,017,211 | 25,023,260 | 6,049 +   | 1 |
| GenelD:330723   | Htra4         | 8 | 25,024,928 | 25,038,962 | 14,034 -  | 1 |
| GenelD:320165   | Tacc1         | 8 | 25,154,552 | 25,201,449 | 46,897 -  | 1 |
| GenelD:14182    | Fgfr1         | 8 | 25,518,772 | 25,575,714 | 56,942 +  | 1 |
| GenelD:270035   | Letm2         | 8 | 25,578,490 | 25,597,487 | 18,997 -  | 1 |
| GenelD:234135   | Whsc111       | 8 | 25,602,306 | 25,719,667 | 117,361 + | 1 |
| GenelD:72108    | Ddhd2         | 8 | 25,725,324 | 25,754,280 | 28,956 -  | 1 |



|                 |               |   |            |            |           |   |
|-----------------|---------------|---|------------|------------|-----------|---|
| GenelD:10050300 | Gm17484       | 8 | 25,754,480 | 25,769,704 | 15,224 +  | 1 |
| GenelD:67384    | Bag4          | 8 | 25,764,538 | 25,785,209 | 20,671 -  | 2 |
| GenelD:67207    | Lsm1          | 8 | 25,785,591 | 25,803,975 | 18,384 +  | 1 |
| GenelD:52120    | Hgsnat        | 8 | 25,944,459 | 25,976,744 | 32,285 -  | 1 |
| GenelD:74653    | 4930444A02Rik | 8 | 25,980,604 | 25,994,121 | 13,517 -  | 1 |
| GenelD:320191   | Hook3         | 8 | 26,021,421 | 26,119,224 | 97,803 -  | 1 |
| GenelD:77733    | Rnf170        | 8 | 26,119,380 | 26,143,871 | 24,491 +  | 1 |
| GenelD:353310   | Zfp703        | 8 | 26,977,336 | 26,981,462 | 4,126 +   | 2 |
| GenelD:244373   | Erlin2        | 8 | 27,023,799 | 27,039,437 | 15,638 +  | 1 |
| GenelD:78560    | Gpr124        | 8 | 27,085,841 | 27,123,436 | 37,595 +  | 2 |
| GenelD:66653    | Brf2          | 8 | 27,123,832 | 27,128,632 | 4,800 -   | 1 |
| GenelD:75767    | Rab11fip1     | 8 | 27,138,773 | 27,174,646 | 35,873 -  | 1 |
| GenelD:10105584 | LOC101055849  | 8 | 27,159,828 | 27,170,695 | 10,867 +  | 1 |
| GenelD:13685    | Eif4ebp1      | 8 | 27,260,327 | 27,275,656 | 15,329 +  | 1 |
| GenelD:10031666 | Mir1186       | 8 | 31,102,921 | 31,103,042 | 121 -     | 1 |
| GenelD:68867    | Rnf122        | 8 | 31,111,846 | 31,131,482 | 19,636 +  | 1 |
| GenelD:234138   | Tti2          | 8 | 31,150,316 | 31,164,703 | 14,387 +  | 1 |
| GenelD:67920    | Mak16         | 8 | 31,159,468 | 31,168,724 | 9,256 -   | 1 |
| GenelD:10105598 | LOC101055986  | 8 | 32,851,982 | 32,884,254 | 32,272 -  | 1 |
| GenelD:10004271 | Gm3985        | 8 | 32,888,505 | 32,950,026 | 61,521 -  | 1 |
| GenelD:22427    | Wrn           | 8 | 33,234,373 | 33,385,527 | 151,154 - | 1 |
| GenelD:75029    | Purg          | 8 | 33,386,325 | 33,417,469 | 31,144 +  | 1 |
| GenelD:19053    | Ppp2cb        | 8 | 33,599,621 | 33,619,804 | 20,183 +  | 1 |
| GenelD:10050459 | 1700104B16Rik | 8 | 33,730,538 | 33,731,814 | 1,276 -   | 1 |
| GenelD:68153    | Gtf2e2        | 8 | 33,731,914 | 33,777,173 | 45,259 +  | 1 |
| GenelD:72632    | Smim18        | 8 | 33,742,112 | 33,747,770 | 5,658 -   | 1 |
| GenelD:19663    | Rbpms         | 8 | 33,782,644 | 33,929,841 | 147,197 - | 1 |
| GenelD:68192    | Leprotl1      | 8 | 34,135,572 | 34,146,739 | 11,167 -  | 1 |
| GenelD:67887    | Tmem66        | 8 | 34,154,563 | 34,170,847 | 16,284 +  | 1 |
| GenelD:319520   | Dusp4         | 8 | 34,807,610 | 34,819,894 | 12,284 +  | 1 |
| GenelD:675578   | Gm9648        | 8 | 34,809,534 | 34,810,409 | 875 -     | 1 |
| GenelD:21951    | Tnks          | 8 | 34,829,179 | 34,965,690 | 136,511 - | 1 |
| GenelD:67276    | Eri1          | 8 | 35,465,265 | 35,495,533 | 30,268 -  | 1 |
| GenelD:10050471 | Gm16793       | 8 | 35,582,503 | 35,589,020 | 6,517 -   | 1 |
| GenelD:52065    | Mfhas1        | 8 | 35,587,798 | 35,679,449 | 91,651 +  | 1 |
| GenelD:244421   | Lonrf1        | 8 | 36,216,064 | 36,249,516 | 33,452 -  | 1 |
| GenelD:80286    | Tusc3         | 8 | 39,005,867 | 39,130,878 | 125,011 + | 1 |
| GenelD:78506    | Micu3         | 8 | 40,308,051 | 40,386,304 | 78,253 +  | 1 |
| GenelD:18983    | Cnot7         | 8 | 40,493,036 | 40,511,304 | 18,268 -  | 1 |
| GenelD:52348    | Vps37a        | 8 | 40,511,783 | 40,551,134 | 39,351 +  | 1 |
| GenelD:11988    | Slc7a2        | 8 | 40,862,367 | 40,922,070 | 59,703 +  | 1 |
| GenelD:102103   | Mtus1         | 8 | 40,990,912 | 41,133,726 | 142,814 - | 1 |
| GenelD:18536    | Pcm1          | 8 | 41,239,759 | 41,334,087 | 94,328 +  | 1 |
| GenelD:11886    | Asah1         | 8 | 41,340,643 | 41,374,697 | 34,054 -  | 1 |
| GenelD:10004539 | Gm9908        | 8 | 44,934,730 | 44,935,159 | 429 -     | 1 |
| GenelD:11739    | Slc25a4       | 8 | 46,207,339 | 46,211,009 | 3,670 -   | 1 |
| GenelD:14081    | Acsl1         | 8 | 46,471,042 | 46,536,050 | 65,008 +  | 1 |

|                 |               |   |            |            |           |   |
|-----------------|---------------|---|------------|------------|-----------|---|
| GenelD:10050349 | Gm16675       | 8 | 46,730,970 | 46,739,515 | 8,545 -   | 2 |
| GenelD:16363    | Irf2          | 8 | 46,739,745 | 46,847,458 | 107,713 + | 2 |
| GenelD:71069    | Stox2         | 8 | 47,180,048 | 47,352,348 | 172,300 - | 1 |
| GenelD:384817   | 4930448N21Rik | 8 | 47,294,272 | 47,446,362 | 152,090 - | 2 |
| GenelD:69260    | Ing2          | 8 | 47,667,178 | 47,675,159 | 7,981 -   | 1 |
| GenelD:546058   | AA386476      | 8 | 47,675,377 | 47,685,457 | 10,080 +  | 1 |
| GenelD:70925    | Cdkn2aip      | 8 | 47,709,344 | 47,713,931 | 4,587 -   | 1 |
| GenelD:52357    | Wwc2          | 8 | 47,827,595 | 47,990,551 | 162,956 - | 1 |
| GenelD:320685   | Dctd          | 8 | 48,099,092 | 48,141,667 | 42,575 +  | 1 |
| GenelD:23965    | Tenm3         | 8 | 48,225,665 | 48,674,690 | 449,025 - | 1 |
| GenelD:73020    | 2900073C17Rik | 8 | 48,841,997 | 48,843,846 | 1,849 -   | 1 |
| GenelD:76687    | Spcs3         | 8 | 54,520,433 | 54,529,998 | 9,565 -   | 1 |
| GenelD:20284    | Scrg1         | 8 | 57,455,923 | 57,477,585 | 21,662 +  | 1 |
| GenelD:60406    | Sap30         | 8 | 57,482,702 | 57,487,860 | 5,158 -   | 1 |
| GenelD:97165    | Hmgb2         | 8 | 57,511,843 | 57,515,999 | 4,156 +   | 1 |
| GenelD:108150   | Galnt7        | 8 | 57,523,825 | 57,653,055 | 129,230 - | 1 |
| GenelD:10050261 | AW046200      | 8 | 57,651,753 | 57,663,430 | 11,677 +  | 1 |
| GenelD:71306    | Mfap3l        | 8 | 60,632,860 | 60,676,731 | 43,871 +  | 1 |
| GenelD:59009    | Sh3rf1        | 8 | 61,224,171 | 61,396,072 | 171,901 + | 1 |
| GenelD:234309   | Cbr4          | 8 | 61,487,734 | 61,503,500 | 15,766 +  | 1 |
| GenelD:72333    | Palld         | 8 | 61,515,021 | 61,902,690 | 387,669 - | 1 |
| GenelD:73067    | Tmem192       | 8 | 64,947,185 | 64,969,036 | 21,851 +  | 1 |
| GenelD:234344   | Naf1          | 8 | 66,860,217 | 66,890,564 | 30,347 +  | 2 |
| GenelD:234356   | Csgalnact1    | 8 | 68,356,781 | 68,735,146 | 378,365 - | 1 |
| GenelD:16956    | Lpl           | 8 | 68,880,555 | 68,906,932 | 26,377 +  | 1 |
| GenelD:234358   | Zfp930        | 8 | 69,209,046 | 69,230,539 | 21,493 +  | 1 |
| GenelD:636741   | Zfp964        | 8 | 69,654,556 | 69,664,453 | 9,897 +   | 1 |
| GenelD:66869    | Zfp869        | 8 | 69,705,137 | 69,716,902 | 11,765 -  | 1 |
| GenelD:170759   | Atp13a1       | 8 | 69,791,163 | 69,807,749 | 16,586 +  | 1 |
| GenelD:234365   | Yjefn3        | 8 | 69,887,788 | 69,893,975 | 6,187 -   | 1 |
| GenelD:67184    | Ndufa13       | 8 | 69,894,180 | 69,902,558 | 8,378 -   | 1 |
| GenelD:83984    | Tssk6         | 8 | 69,902,215 | 69,903,518 | 1,303 +   | 1 |
| GenelD:234366   | Gatad2a       | 8 | 69,907,069 | 69,996,379 | 89,310 -  | 3 |
| GenelD:74549    | Mau2          | 8 | 70,016,123 | 70,042,734 | 26,611 -  | 1 |
| GenelD:70616    | Sugp1         | 8 | 70,042,813 | 70,071,953 | 29,140 +  | 1 |
| GenelD:76813    | Armc6         | 8 | 70,220,192 | 70,234,422 | 14,230 -  | 1 |
| GenelD:234373   | Sugp2         | 8 | 70,234,226 | 70,263,105 | 28,879 +  | 1 |
| GenelD:10050383 | LOC100503831  | 8 | 70,273,592 | 70,279,916 | 6,324 +   | 1 |
| GenelD:26558    | Homer3        | 8 | 70,282,999 | 70,294,361 | 11,362 +  | 2 |
| GenelD:234374   | Ddx49         | 8 | 70,292,866 | 70,302,452 | 9,586 -   | 2 |
| GenelD:59042    | Cope          | 8 | 70,302,785 | 70,312,990 | 10,205 +  | 2 |
| GenelD:93898    | Cers1         | 8 | 70,315,775 | 70,331,588 | 15,813 +  | 2 |
| GenelD:14559    | Gdf1          | 8 | 70,315,775 | 70,331,592 | 15,817 +  | 2 |
| GenelD:19704    | Upf1          | 8 | 70,331,522 | 70,353,273 | 21,751 -  | 2 |
| GenelD:12845    | Comp          | 8 | 70,373,548 | 70,382,066 | 8,518 +   | 1 |
| GenelD:382056   | Crtc1         | 8 | 70,382,358 | 70,439,573 | 57,215 -  | 1 |
| GenelD:12931    | Crlf1         | 8 | 70,493,156 | 70,504,081 | 10,925 +  | 1 |

|                 |               |   |            |            |          |   |
|-----------------|---------------|---|------------|------------|----------|---|
| GenelD:66462    | 2810428I15Rik | 8 | 70,504,296 | 70,506,739 | 2,443 -  | 1 |
| GenelD:22186    | Uba52         | 8 | 70,508,266 | 70,510,367 | 2,101 -  | 1 |
| GenelD:75620    | Kxd1          | 8 | 70,513,396 | 70,523,180 | 9,784 -  | 1 |
| GenelD:14232    | Fkbp8         | 8 | 70,527,743 | 70,535,328 | 7,585 +  | 1 |
| GenelD:13716    | Ell           | 8 | 70,539,675 | 70,592,858 | 53,183 + | 2 |
| GenelD:71780    | Isyna1        | 8 | 70,594,481 | 70,597,290 | 2,809 +  | 1 |
| GenelD:76900    | Ssbp4         | 8 | 70,597,490 | 70,608,314 | 10,824 - | 3 |
| GenelD:211228   | Lrrc25        | 8 | 70,616,844 | 70,620,850 | 4,006 +  | 3 |
| GenelD:23886    | Gdf15         | 8 | 70,629,394 | 70,631,635 | 2,241 -  | 1 |
| GenelD:66522    | Pgpep1        | 8 | 70,646,436 | 70,659,738 | 13,302 - | 1 |
| GenelD:16478    | Jund          | 8 | 70,697,739 | 70,700,616 | 2,877 +  | 1 |
| GenelD:637079   | Gm16486       | 8 | 70,708,160 | 70,717,650 | 9,490 +  | 1 |
| GenelD:110385   | Pde4c         | 8 | 70,724,064 | 70,751,186 | 27,122 + | 1 |
| GenelD:19339    | Rab3a         | 8 | 70,754,679 | 70,758,686 | 4,007 +  | 1 |
| GenelD:234384   | Mpv17l2       | 8 | 70,758,649 | 70,760,921 | 2,272 -  | 1 |
| GenelD:65972    | Ifi30         | 8 | 70,762,773 | 70,766,663 | 3,890 -  | 3 |
| GenelD:18709    | Pik3r2        | 8 | 70,768,181 | 70,776,712 | 8,531 -  | 2 |
| GenelD:72093    | 2010320M18Rik | 8 | 70,776,862 | 70,777,606 | 744 +    | 2 |
| GenelD:546071   | Mast3         | 8 | 70,778,117 | 70,792,433 | 14,316 - | 3 |
| GenelD:70807    | Arrdc2        | 8 | 70,835,138 | 70,839,720 | 4,582 -  | 1 |
| GenelD:84036    | Kcnn1         | 8 | 70,842,049 | 70,857,008 | 14,959 - | 2 |
| GenelD:442796   | A230052G05Rik | 8 | 70,862,997 | 70,865,428 | 2,431 +  | 2 |
| GenelD:234388   | Ccdc124       | 8 | 70,868,227 | 70,873,490 | 5,263 -  | 2 |
| GenelD:114479   | Slc5a5        | 8 | 70,882,889 | 70,892,757 | 9,868 -  | 3 |
| GenelD:76808    | Rpl18a        | 8 | 70,894,722 | 70,897,443 | 2,721 -  | 3 |
| GenelD:104370   | Snora68       | 8 | 70,895,759 | 70,895,856 | 97 -     | 2 |
| GenelD:270058   | Map1s         | 8 | 70,905,974 | 70,917,529 | 11,555 + | 2 |
| GenelD:76478    | Haus8         | 8 | 71,251,124 | 71,272,590 | 21,466 - | 1 |
| GenelD:17925    | Myo9b         | 8 | 71,272,714 | 71,360,712 | 87,998 + | 2 |
| GenelD:67023    | Use1          | 8 | 71,366,848 | 71,369,732 | 2,884 +  | 2 |
| GenelD:77090    | Ocel1         | 8 | 71,371,298 | 71,373,689 | 2,391 +  | 3 |
| GenelD:13864    | Nr2f6         | 8 | 71,374,119 | 71,381,952 | 7,833 -  | 3 |
| GenelD:234395   | Ushbp1        | 8 | 71,384,274 | 71,395,801 | 11,527 - | 2 |
| GenelD:68251    | Babam1        | 8 | 71,396,855 | 71,404,772 | 7,917 +  | 1 |
| GenelD:234396   | Ankle1        | 8 | 71,406,012 | 71,409,904 | 3,892 +  | 1 |
| GenelD:64296    | Abhd8         | 8 | 71,456,700 | 71,463,657 | 6,957 -  | 2 |
| GenelD:94065    | Mrpl34        | 8 | 71,464,926 | 71,465,753 | 827 +    | 2 |
| GenelD:66498    | Dda1          | 8 | 71,469,194 | 71,476,435 | 7,241 +  | 3 |
| GenelD:382014   | Ano8          | 8 | 71,476,019 | 71,486,067 | 10,048 - | 1 |
| GenelD:70359    | Gtpbp3        | 8 | 71,488,103 | 71,493,400 | 5,297 +  | 1 |
| GenelD:26457    | Slc27a1       | 8 | 71,568,927 | 71,586,708 | 17,781 + | 1 |
| GenelD:66171    | Pgls          | 8 | 71,592,184 | 71,596,267 | 4,083 +  | 1 |
| GenelD:10003727 | Fam129c       | 8 | 71,597,646 | 71,608,149 | 10,503 + | 2 |
| GenelD:234407   | Glt25d1       | 8 | 71,611,024 | 71,624,911 | 13,887 + | 1 |
| GenelD:382018   | Unc13a        | 8 | 71,626,712 | 71,671,757 | 45,045 - | 1 |
| GenelD:16453    | Jak3          | 8 | 71,676,383 | 71,690,577 | 14,194 + | 1 |
| GenelD:236193   | Zfp709        | 8 | 71,882,068 | 71,892,565 | 10,497 + | 1 |

|                 |               |   |            |            |           |   |
|-----------------|---------------|---|------------|------------|-----------|---|
| GenelD:326618   | Tpm4          | 8 | 72,135,292 | 72,153,129 | 17,837 +  | 2 |
| GenelD:17274    | Rab8a         | 8 | 72,161,200 | 72,181,366 | 20,166 +  | 1 |
| GenelD:16598    | Klf2          | 8 | 72,319,062 | 72,321,654 | 2,592 +   | 1 |
| GenelD:13859    | Eps15l1       | 8 | 72,340,995 | 72,421,474 | 80,479 -  | 1 |
| GenelD:73316    | Calr3         | 8 | 72,424,183 | 72,443,778 | 19,595 -  | 1 |
| GenelD:27967    | Cherp         | 8 | 72,460,483 | 72,475,233 | 14,750 -  | 1 |
| GenelD:270066   | Slc35e1       | 8 | 72,477,995 | 72,492,614 | 14,619 -  | 2 |
| GenelD:70625    | Med26         | 8 | 72,494,558 | 72,548,310 | 53,752 -  | 2 |
| GenelD:319555   | Nwd1          | 8 | 72,646,711 | 72,714,746 | 68,035 +  | 2 |
| GenelD:20467    | Sin3b         | 8 | 72,723,288 | 72,758,203 | 34,915 +  | 1 |
| GenelD:16795    | Large         | 8 | 72,814,599 | 73,352,556 | 537,957 - | 1 |
| GenelD:70823    | Hmgxb4        | 8 | 74,993,703 | 75,031,972 | 38,269 +  | 2 |
| GenelD:21968    | Tom1          | 8 | 75,033,686 | 75,070,121 | 36,435 +  | 1 |
| GenelD:15368    | Hmox1         | 8 | 75,093,618 | 75,100,593 | 6,975 +   | 1 |
| GenelD:17218    | Mcm5          | 8 | 75,109,528 | 75,128,439 | 18,911 +  | 1 |
| GenelD:78514    | Arhgap10      | 8 | 77,250,366 | 77,517,907 | 267,541 - | 1 |
| GenelD:70345    | 0610038B21Rik | 8 | 77,517,056 | 77,518,578 | 1,522 +   | 1 |
| GenelD:102182   | Prmt10        | 8 | 77,549,397 | 77,581,338 | 31,941 +  | 1 |
| GenelD:19656    | Rbmx1         | 8 | 78,505,269 | 78,508,928 | 3,659 -   | 1 |
| GenelD:76775    | Slc10a7       | 8 | 78,509,335 | 78,734,005 | 224,670 + | 1 |
| GenelD:622675   | Zfp827        | 8 | 79,028,437 | 79,193,766 | 165,329 + | 1 |
| GenelD:17125    | Smad1         | 8 | 79,338,395 | 79,399,468 | 61,073 -  | 1 |
| GenelD:73945    | Otud4         | 8 | 79,639,676 | 79,677,755 | 38,079 +  | 1 |
| GenelD:24015    | Abce1         | 8 | 79,683,442 | 79,711,740 | 28,298 -  | 1 |
| GenelD:68999    | Anapc10       | 8 | 79,711,820 | 79,777,321 | 65,501 +  | 1 |
| GenelD:15245    | Hhip          | 8 | 79,965,851 | 80,058,008 | 92,157 -  | 1 |
| GenelD:93762    | Smarca5       | 8 | 80,699,943 | 80,739,459 | 39,516 -  | 1 |
| GenelD:14388    | Gab1          | 8 | 80,764,434 | 80,880,479 | 116,045 - | 1 |
| GenelD:74841    | Usp38         | 8 | 80,980,733 | 81,014,906 | 34,173 -  | 1 |
| GenelD:10105565 | LOC101055650  | 8 | 81,013,576 | 81,038,584 | 25,008 +  | 1 |
| GenelD:30932    | Zfp330        | 8 | 82,763,620 | 82,774,126 | 10,506 -  | 1 |
| GenelD:244548   | Elmod2        | 8 | 83,312,632 | 83,332,486 | 19,854 -  | 1 |
| GenelD:81489    | Dnajb1        | 8 | 83,608,175 | 83,611,903 | 3,728 +   | 1 |
| GenelD:67903    | Gipc1         | 8 | 83,652,678 | 83,664,789 | 12,111 +  | 2 |
| GenelD:19216    | Ptger1        | 8 | 83,666,640 | 83,670,103 | 3,463 +   | 1 |
| GenelD:320795   | Pkn1          | 8 | 83,669,762 | 83,699,179 | 29,417 -  | 1 |
| GenelD:68278    | Ddx39         | 8 | 83,715,177 | 83,723,351 | 8,174 +   | 1 |
| GenelD:26364    | Cd97          | 8 | 83,723,251 | 83,741,311 | 18,060 -  | 1 |
| GenelD:330814   | Lphn1         | 8 | 83,900,098 | 83,941,954 | 41,856 +  | 1 |
| GenelD:66929    | Asf1b         | 8 | 83,955,694 | 83,970,195 | 14,501 +  | 1 |
| GenelD:18747    | Prkaca        | 8 | 83,972,978 | 83,996,445 | 23,467 +  | 3 |
| GenelD:666704   | Samd1         | 8 | 83,997,672 | 84,000,386 | 2,714 +   | 2 |
| GenelD:73453    | 1700067K01Rik | 8 | 84,001,706 | 84,004,770 | 3,064 +   | 3 |
| GenelD:70134    | 2210011C24Rik | 8 | 84,010,228 | 84,012,156 | 1,928 -   | 2 |
| GenelD:10031667 | Mir1199       | 8 | 84,011,515 | 84,011,633 | 118 -     | 2 |
| GenelD:74337    | Palm3         | 8 | 84,021,474 | 84,030,295 | 8,821 +   | 1 |
| GenelD:244551   | Nanos3        | 8 | 84,173,733 | 84,176,552 | 2,819 -   | 1 |

|                 |               |   |            |            |           |   |
|-----------------|---------------|---|------------|------------|-----------|---|
| GenelD:10004954 | Mir181d       | 8 | 84,178,716 | 84,178,787 | 71 -      | 1 |
| GenelD:723819   | Mir181c       | 8 | 84,178,873 | 84,178,961 | 88 -      | 1 |
| GenelD:387216   | Mir23a        | 8 | 84,208,518 | 84,208,592 | 74 +      | 1 |
| GenelD:387220   | Mir27a        | 8 | 84,208,672 | 84,208,758 | 86 +      | 1 |
| GenelD:723960   | Mir24-2       | 8 | 84,208,815 | 84,208,921 | 106 +     | 1 |
| GenelD:10052652 | Mir3074-2     | 8 | 84,208,825 | 84,208,907 | 82 -      | 1 |
| GenelD:212168   | Zswim4        | 8 | 84,210,942 | 84,237,042 | 26,100 -  | 1 |
| GenelD:101966   | D8Ertd738e    | 8 | 84,246,235 | 84,249,761 | 3,526 -   | 2 |
| GenelD:67873    | Mri1          | 8 | 84,250,576 | 84,257,324 | 6,748 -   | 2 |
| GenelD:67736    | Ccdc130       | 8 | 84,257,795 | 84,270,360 | 12,565 -  | 2 |
| GenelD:12286    | Cacna1a       | 8 | 84,415,364 | 84,640,249 | 224,885 + | 1 |
| GenelD:15936    | Ier2          | 8 | 84,661,331 | 84,662,852 | 1,521 -   | 1 |
| GenelD:66830    | Nacc1         | 8 | 84,670,479 | 84,687,862 | 17,383 -  | 2 |
| GenelD:212528   | Trmt1         | 8 | 84,689,247 | 84,699,808 | 10,561 +  | 1 |
| GenelD:18032    | Nfix          | 8 | 84,707,599 | 84,800,340 | 92,741 -  | 2 |
| GenelD:619292   | G430095P16Rik | 8 | 84,723,007 | 84,726,846 | 3,839 +   | 1 |
| GenelD:23863    | Dand5         | 8 | 84,815,405 | 84,832,265 | 16,860 -  | 1 |
| GenelD:102060   | Gadd45gip1    | 8 | 84,832,282 | 84,835,482 | 3,200 +   | 2 |
| GenelD:19358    | Rad23a        | 8 | 84,834,652 | 84,840,641 | 5,989 -   | 3 |
| GenelD:12317    | Calr          | 8 | 84,842,088 | 84,846,931 | 4,843 -   | 4 |
| GenelD:73619    | 1700122E12Rik | 8 | 84,847,188 | 84,848,415 | 1,227 +   | 3 |
| GenelD:66590    | Farsa         | 8 | 84,856,986 | 84,869,257 | 12,271 +  | 2 |
| GenelD:16596    | Klf1          | 8 | 84,901,928 | 84,905,295 | 3,367 +   | 1 |
| GenelD:13423    | Dnase2a       | 8 | 84,908,624 | 84,911,461 | 2,837 +   | 1 |
| GenelD:56527    | Mast1         | 8 | 84,911,853 | 84,937,353 | 25,500 -  | 1 |
| GenelD:234542   | Rtbdn         | 8 | 84,946,991 | 84,956,603 | 9,612 +   | 1 |
| GenelD:69724    | Rnaseh2a      | 8 | 84,956,610 | 84,966,011 | 9,401 -   | 3 |
| GenelD:10105573 | LOC101055733  | 8 | 84,966,033 | 84,969,533 | 3,500 -   | 4 |
| GenelD:21672    | Prdx2         | 8 | 84,969,648 | 84,974,313 | 4,665 +   | 4 |
| GenelD:16477    | Junb          | 8 | 84,976,909 | 84,978,748 | 1,839 -   | 4 |
| GenelD:170833   | Hook2         | 8 | 84,990,595 | 85,003,364 | 12,769 +  | 1 |
| GenelD:56495    | Asna1         | 8 | 85,017,931 | 85,025,278 | 7,347 -   | 1 |
| GenelD:68544    | 2310036O22Rik | 8 | 85,026,833 | 85,030,286 | 3,453 +   | 3 |
| GenelD:212999   | Tnpo2         | 8 | 85,036,915 | 85,057,583 | 20,668 +  | 4 |
| GenelD:320466   | A230103J11Rik | 8 | 85,053,150 | 85,060,443 | 7,293 -   | 1 |
| GenelD:68628    | Fbxw9         | 8 | 85,060,119 | 85,067,121 | 7,002 +   | 2 |
| GenelD:10050371 | Gm5741        | 8 | 85,067,568 | 85,067,982 | 414 -     | 2 |
| GenelD:330817   | Dhps          | 8 | 85,071,757 | 85,075,161 | 3,404 +   | 1 |
| GenelD:67836    | Wdr83         | 8 | 85,075,035 | 85,080,746 | 5,711 -   | 1 |
| GenelD:414077   | BC056474      | 8 | 85,080,963 | 85,082,339 | 1,376 +   | 1 |
| GenelD:65114    | Vps35         | 8 | 85,260,392 | 85,299,497 | 39,105 -  | 1 |
| GenelD:56452    | Orc6          | 8 | 85,299,632 | 85,308,279 | 8,647 +   | 1 |
| GenelD:108682   | Gpt2          | 8 | 85,492,617 | 85,527,558 | 34,941 +  | 1 |
| GenelD:56445    | Dnaja2        | 8 | 85,537,640 | 85,555,271 | 17,631 -  | 1 |
| GenelD:71927    | Irfg1         | 8 | 85,717,557 | 85,840,949 | 123,392 - | 1 |
| GenelD:102093   | Phkb          | 8 | 85,841,002 | 86,060,642 | 219,640 + | 1 |
| GenelD:66887    | Lonp2         | 8 | 86,624,043 | 86,716,636 | 92,593 +  | 1 |

|                 |               |   |             |             |           |   |
|-----------------|---------------|---|-------------|-------------|-----------|---|
| GenelD:20437    | Siah1a        | 8 | 86,723,933  | 86,746,006  | 22,073 -  | 1 |
| GenelD:666945   | Gm10638       | 8 | 86,745,699  | 86,747,060  | 1,361 +   | 1 |
| GenelD:80750    | N4bp1         | 8 | 86,841,139  | 86,885,258  | 44,119 -  | 1 |
| GenelD:10050375 | Gm19872       | 8 | 87,460,469  | 87,463,792  | 3,323 +   | 3 |
| GenelD:12404    | Cbln1         | 8 | 87,468,853  | 87,472,592  | 3,739 -   | 3 |
| GenelD:10004029 | Gm2694        | 8 | 87,472,812  | 87,525,554  | 52,742 +  | 3 |
| GenelD:94187    | Zfp423        | 8 | 87,661,810  | 87,959,595  | 297,785 - | 1 |
| GenelD:382030   | Cnep1r1       | 8 | 88,118,759  | 88,135,197  | 16,438 +  | 1 |
| GenelD:214627   | Papd5         | 8 | 88,199,213  | 88,259,722  | 60,509 +  | 1 |
| GenelD:11513    | Adcy7         | 8 | 88,272,403  | 88,329,962  | 57,559 +  | 2 |
| GenelD:26992    | Brd7          | 8 | 88,332,311  | 88,362,191  | 29,880 -  | 1 |
| GenelD:93960    | Nkd1          | 8 | 88,521,344  | 88,594,887  | 73,543 +  | 1 |
| GenelD:71607    | Snx20         | 8 | 88,626,828  | 88,636,128  | 9,300 -   | 1 |
| GenelD:257632   | Nod2          | 8 | 88,647,347  | 88,688,474  | 41,127 +  | 1 |
| GenelD:74256    | Cyld          | 8 | 88,697,028  | 88,751,945  | 54,917 +  | 1 |
| GenelD:109151   | Chd9          | 8 | 90,828,835  | 91,054,508  | 225,673 + | 1 |
| GenelD:19651    | Rbl2          | 8 | 91,070,094  | 91,123,844  | 53,750 +  | 1 |
| GenelD:16373    | Irx3          | 8 | 91,798,511  | 91,801,654  | 3,143 -   | 1 |
| GenelD:10105581 | LOC101055810  | 8 | 91,802,175  | 91,805,215  | 3,040 +   | 1 |
| GenelD:17390    | Mmp2          | 8 | 92,827,328  | 92,853,420  | 26,092 +  | 1 |
| GenelD:23802    | Amfr          | 8 | 93,971,588  | 94,012,640  | 41,052 -  | 1 |
| GenelD:68219    | Nudt21        | 8 | 94,019,403  | 94,037,039  | 17,636 -  | 1 |
| GenelD:71805    | Nup93         | 8 | 94,214,601  | 94,315,066  | 100,465 + | 1 |
| GenelD:10004155 | Rpl10-ps5     | 8 | 94,222,952  | 94,223,709  | 757 +     | 1 |
| GenelD:64209    | Herpud1       | 8 | 94,386,500  | 94,395,358  | 8,858 +   | 1 |
| GenelD:434341   | Nlrc5         | 8 | 94,472,763  | 94,527,272  | 54,509 +  | 1 |
| GenelD:234577   | Cpne2         | 8 | 94,533,028  | 94,570,529  | 37,501 +  | 1 |
| GenelD:109006   | Ciapin1       | 8 | 94,819,818  | 94,838,340  | 18,522 -  | 1 |
| GenelD:664947   | Gm7418        | 8 | 94,835,698  | 94,836,559  | 861 +     | 1 |
| GenelD:67914    | Coq9          | 8 | 94,838,417  | 94,854,895  | 16,478 +  | 2 |
| GenelD:20021    | Polr2c        | 8 | 94,857,450  | 94,864,242  | 6,792 +   | 1 |
| GenelD:114255   | Dok4          | 8 | 94,863,828  | 94,876,312  | 12,484 -  | 1 |
| GenelD:234582   | Ccdc102a      | 8 | 94,902,869  | 94,918,098  | 15,229 -  | 1 |
| GenelD:382045   | Gpr114        | 8 | 94,923,694  | 94,943,290  | 19,596 +  | 1 |
| GenelD:73407    | Tepp          | 8 | 95,311,515  | 95,321,328  | 9,813 +   | 2 |
| GenelD:79233    | Zfp319        | 8 | 95,326,136  | 95,331,950  | 5,814 -   | 2 |
| GenelD:101985   | Usb1          | 8 | 95,332,284  | 95,347,513  | 15,229 +  | 3 |
| GenelD:17388    | Mmp15         | 8 | 95,352,337  | 95,374,293  | 21,956 +  | 1 |
| GenelD:13000    | Csnk2a2       | 8 | 95,446,096  | 95,488,820  | 42,724 -  | 1 |
| GenelD:78833    | Gins3         | 8 | 95,633,559  | 95,645,059  | 11,500 +  | 1 |
| GenelD:234593   | Ndrp4         | 8 | 95,703,037  | 95,715,119  | 12,082 +  | 1 |
| GenelD:66083    | Setd6         | 8 | 95,715,913  | 95,719,004  | 3,091 +   | 1 |
| GenelD:234594   | Cnot1         | 8 | 95,719,451  | 95,807,462  | 88,011 -  | 2 |
| GenelD:319960   | 4930513N10Rik | 8 | 95,806,830  | 95,821,728  | 14,898 +  | 1 |
| GenelD:65115    | Bean1         | 8 | 104,170,513 | 104,219,098 | 48,585 +  | 1 |
| GenelD:57813    | Tk2           | 8 | 104,226,691 | 104,248,558 | 21,867 -  | 1 |
| GenelD:75458    | Cklf          | 8 | 104,250,903 | 104,264,936 | 14,033 +  | 1 |

|                 |               |   |             |             |          |   |
|-----------------|---------------|---|-------------|-------------|----------|---|
| GenelD:320206   | A730028G07Rik | 8 | 104,258,235 | 104,261,286 | 3,051 +  | 1 |
| GenelD:97487    | Cmtm4         | 8 | 104,348,191 | 104,395,807 | 47,616 - | 1 |
| GenelD:234663   | Dync1li2      | 8 | 104,417,674 | 104,443,047 | 25,373 - | 1 |
| GenelD:320022   | Ccdc79        | 8 | 104,446,719 | 104,509,887 | 63,168 - | 1 |
| GenelD:234664   | Nae1          | 8 | 104,511,028 | 104,534,637 | 23,609 - | 1 |
| GenelD:12354    | Car7          | 8 | 104,540,807 | 104,550,343 | 9,536 +  | 1 |
| GenelD:12556    | Cdh16         | 8 | 104,601,915 | 104,624,396 | 22,481 - | 1 |
| GenelD:56437    | Rrad          | 8 | 104,628,066 | 104,631,321 | 3,255 -  | 1 |
| GenelD:68523    | Fam96b        | 8 | 104,639,839 | 104,641,728 | 1,889 -  | 1 |
| GenelD:234677   | Ces4a         | 8 | 105,131,800 | 105,150,109 | 18,309 + | 1 |
| GenelD:12400    | Cbfb          | 8 | 105,170,674 | 105,217,989 | 47,315 + | 1 |
| GenelD:234678   | D230025D16Rik | 8 | 105,225,188 | 105,253,053 | 27,865 + | 2 |
| GenelD:97440    | B3gnt9        | 8 | 105,252,638 | 105,255,151 | 2,513 -  | 2 |
| GenelD:71609    | Tradd         | 8 | 105,258,575 | 105,264,594 | 6,019 -  | 2 |
| GenelD:50788    | Fbxl8         | 8 | 105,264,648 | 105,269,326 | 4,678 +  | 2 |
| GenelD:26386    | Hsf4          | 8 | 105,269,801 | 105,275,845 | 6,044 +  | 1 |
| GenelD:78688    | Nol3          | 8 | 105,276,447 | 105,281,939 | 5,492 +  | 1 |
| GenelD:74356    | 4931428F04Rik | 8 | 105,280,409 | 105,289,528 | 9,119 -  | 2 |
| GenelD:277978   | Exoc3l        | 8 | 105,289,924 | 105,296,098 | 6,174 -  | 2 |
| GenelD:104394   | E2f4          | 8 | 105,297,663 | 105,305,370 | 7,707 +  | 2 |
| GenelD:234683   | Elmo3         | 8 | 105,305,601 | 105,310,623 | 5,022 +  | 1 |
| GenelD:723841   | Mir328        | 8 | 105,308,364 | 105,308,460 | 96 -     | 1 |
| GenelD:234686   | Fhod1         | 8 | 105,329,160 | 105,347,970 | 18,810 - | 2 |
| GenelD:277973   | Slc9a5        | 8 | 105,348,258 | 105,369,881 | 21,623 + | 2 |
| GenelD:70796    | Zdhhc1        | 8 | 105,472,425 | 105,496,870 | 24,445 - | 1 |
| GenelD:11972    | Atp6v0d1      | 8 | 105,524,470 | 105,566,040 | 41,570 - | 1 |
| GenelD:11604    | Agrp          | 8 | 105,566,698 | 105,568,298 | 1,600 -  | 1 |
| GenelD:75687    | Fam65a        | 8 | 105,605,229 | 105,622,219 | 16,990 + | 2 |
| GenelD:10031671 | Mir1966       | 8 | 105,615,466 | 105,615,573 | 107 +    | 2 |
| GenelD:546100   | Gm5914        | 8 | 105,624,336 | 105,637,878 | 13,542 - | 2 |
| GenelD:13018    | Ctcf          | 8 | 105,636,538 | 105,682,922 | 46,384 + | 1 |
| GenelD:234695   | Rltpr         | 8 | 105,690,906 | 105,698,165 | 7,259 +  | 1 |
| GenelD:497652   | Acd           | 8 | 105,698,159 | 105,701,095 | 2,936 -  | 1 |
| GenelD:56513    | Pard6a        | 8 | 105,701,154 | 105,703,494 | 2,340 +  | 1 |
| GenelD:102124   | Enkd1         | 8 | 105,703,652 | 105,708,168 | 4,516 -  | 1 |
| GenelD:71046    | 4933405L10Rik | 8 | 105,708,303 | 105,710,168 | 1,865 +  | 1 |
| GenelD:70575    | Gfod2         | 8 | 105,716,113 | 105,758,607 | 42,494 - | 1 |
| GenelD:74334    | Ranbp10       | 8 | 105,768,308 | 105,827,350 | 59,042 - | 1 |
| GenelD:320394   | Cenpt         | 8 | 105,844,678 | 105,852,008 | 7,330 -  | 1 |
| GenelD:59016    | Thap11        | 8 | 105,855,103 | 105,856,950 | 1,847 +  | 1 |
| GenelD:68051    | Nutf2         | 8 | 105,860,634 | 105,880,402 | 19,768 + | 1 |
| GenelD:20498    | Slc12a4       | 8 | 105,943,590 | 105,966,115 | 22,525 - | 1 |
| GenelD:71854    | Dpep3         | 8 | 105,973,520 | 105,979,419 | 5,899 -  | 1 |
| GenelD:66369    | Dus2l         | 8 | 106,011,507 | 106,053,819 | 42,312 + | 1 |
| GenelD:18021    | Nfatc3        | 8 | 106,059,603 | 106,130,537 | 70,934 + | 2 |
| GenelD:77411    | Esrp2         | 8 | 106,131,183 | 106,136,974 | 5,791 -  | 1 |
| GenelD:69771    | 1810019D21Rik | 8 | 106,135,400 | 106,138,723 | 3,323 +  | 1 |

|                 |               |   |             |             |           |   |
|-----------------|---------------|---|-------------|-------------|-----------|---|
| GenelD:192654   | Pla2g15       | 8 | 106,150,399 | 106,164,715 | 14,316 +  | 1 |
| GenelD:330836   | Slc7a6        | 8 | 106,168,875 | 106,198,704 | 29,829 +  | 1 |
| GenelD:66432    | Slc7a6os      | 8 | 106,200,438 | 106,210,933 | 10,495 -  | 1 |
| GenelD:214572   | Prmt7         | 8 | 106,211,054 | 106,251,694 | 40,640 +  | 1 |
| GenelD:68163    | A930006D01Rik | 8 | 106,405,614 | 106,406,529 | 915 -     | 1 |
| GenelD:22751    | Zfp90         | 8 | 106,415,339 | 106,425,889 | 10,550 +  | 1 |
| GenelD:68692    | 1110028F18Rik | 8 | 106,587,143 | 106,594,820 | 7,677 +   | 1 |
| GenelD:12550    | Cdh1          | 8 | 106,603,368 | 106,670,246 | 66,878 +  | 1 |
| GenelD:272538   | Tango6        | 8 | 106,683,068 | 106,851,439 | 168,371 + | 1 |
| GenelD:15118    | Has3          | 8 | 106,870,242 | 106,882,902 | 12,660 +  | 2 |
| GenelD:214987   | Chtf8         | 8 | 106,883,863 | 106,893,593 | 9,730 -   | 1 |
| GenelD:21771    | Cirh1a        | 8 | 106,893,640 | 106,923,094 | 29,454 +  | 1 |
| GenelD:20650    | Sntb2         | 8 | 106,935,750 | 107,014,192 | 78,442 +  | 1 |
| GenelD:116733   | Vps4a         | 8 | 107,031,326 | 107,045,756 | 14,430 +  | 2 |
| GenelD:68023    | Pdf           | 8 | 107,046,289 | 107,048,614 | 2,325 -   | 2 |
| GenelD:97484    | Cog8          | 8 | 107,048,709 | 107,056,737 | 8,028 -   | 2 |
| GenelD:66164    | Nip7          | 8 | 107,056,877 | 107,060,931 | 4,054 +   | 2 |
| GenelD:66269    | Tmed6         | 8 | 107,061,484 | 107,065,644 | 4,160 -   | 1 |
| GenelD:21750    | Terf2         | 8 | 107,069,402 | 107,096,545 | 27,143 -  | 1 |
| GenelD:54446    | Nfat5         | 8 | 107,293,470 | 107,379,517 | 86,047 +  | 1 |
| GenelD:17463    | Psmd7         | 8 | 107,580,380 | 107,588,482 | 8,102 -   | 1 |
| GenelD:11906    | Zfhx3         | 8 | 108,714,644 | 108,961,636 | 246,992 + | 1 |
| GenelD:71955    | Ist1          | 8 | 109,671,321 | 109,693,294 | 21,973 -  | 1 |
| GenelD:11765    | Ap1g1         | 8 | 109,778,640 | 109,864,208 | 85,568 +  | 2 |
| GenelD:244650   | Phlpp2        | 8 | 109,868,603 | 109,944,671 | 76,068 +  | 1 |
| GenelD:234725   | Zfp612        | 8 | 110,079,734 | 110,092,752 | 13,018 +  | 1 |
| GenelD:244653   | Hydin         | 8 | 110,266,977 | 110,610,253 | 343,276 + | 1 |
| GenelD:234729   | Vac14         | 8 | 110,618,638 | 110,720,398 | 101,760 + | 1 |
| GenelD:101943   | Sf3b3         | 8 | 110,810,492 | 110,846,803 | 36,311 -  | 1 |
| GenelD:10021746 | Snord111      | 8 | 110,838,535 | 110,838,598 | 63 -      | 1 |
| GenelD:102339   | Cog4          | 8 | 110,847,024 | 110,882,234 | 35,210 +  | 1 |
| GenelD:20444    | St3gal2       | 8 | 110,919,865 | 110,972,497 | 52,632 +  | 1 |
| GenelD:234734   | Aars          | 8 | 111,033,967 | 111,056,870 | 22,903 +  | 1 |
| GenelD:72544    | Exosc6        | 8 | 111,056,339 | 111,057,599 | 1,260 +   | 1 |
| GenelD:319518   | Pdpr          | 8 | 111,094,745 | 111,135,144 | 40,399 +  | 1 |
| GenelD:20340    | Glg1          | 8 | 111,157,548 | 111,259,202 | 101,654 - | 1 |
| GenelD:234736   | Rfwd3         | 8 | 111,270,944 | 111,300,222 | 29,278 -  | 1 |
| GenelD:170737   | Znrf1         | 8 | 111,536,640 | 111,626,030 | 89,390 +  | 1 |
| GenelD:22640    | Zfp1          | 8 | 111,643,443 | 111,671,011 | 27,568 +  | 1 |
| GenelD:12927    | Bcar1         | 8 | 111,710,474 | 111,743,849 | 33,375 -  | 3 |
| GenelD:23837    | Cfdp1         | 8 | 111,768,473 | 111,854,310 | 85,837 -  | 1 |
| GenelD:56773    | Chst5         | 8 | 111,889,135 | 111,910,199 | 21,064 -  | 1 |
| GenelD:234740   | Tmem231       | 8 | 111,912,018 | 111,933,791 | 21,773 -  | 2 |
| GenelD:93739    | Gabarapl2     | 8 | 111,940,703 | 111,952,915 | 12,212 +  | 2 |
| GenelD:85305    | Kars          | 8 | 111,993,440 | 112,011,305 | 17,865 -  | 1 |
| GenelD:57321    | Terf2ip       | 8 | 112,011,359 | 112,020,528 | 9,169 +   | 1 |
| GenelD:17132    | Maf           | 8 | 115,703,253 | 115,706,894 | 3,641 -   | 1 |



|                 |               |   |             |             |           |   |
|-----------------|---------------|---|-------------|-------------|-----------|---|
| GenelD:75796    | Cdyl2         | 8 | 116,568,724 | 116,732,991 | 164,267 - | 1 |
| GenelD:66531    | Cmc2          | 8 | 116,888,685 | 116,921,436 | 32,751 -  | 1 |
| GenelD:72155    | Cenpn         | 8 | 116,921,740 | 116,941,503 | 19,763 +  | 2 |
| GenelD:234776   | Atmin         | 8 | 116,943,393 | 116,960,445 | 17,052 +  | 1 |
| GenelD:68133    | Gcsh          | 8 | 116,981,828 | 116,993,449 | 11,621 -  | 1 |
| GenelD:76645    | Pkd1l2        | 8 | 116,995,679 | 117,082,449 | 86,770 -  | 1 |
| GenelD:209239   | Gan           | 8 | 117,158,135 | 117,205,186 | 47,051 +  | 1 |
| GenelD:74440    | Cmip          | 8 | 117,257,019 | 117,461,506 | 204,487 + | 1 |
| GenelD:68533    | Mphosph6      | 8 | 117,791,645 | 117,801,929 | 10,284 -  | 1 |
| GenelD:10050440 | Gm10617       | 8 | 117,802,102 | 117,803,180 | 1,078 +   | 1 |
| GenelD:56690    | Mlycd         | 8 | 119,394,892 | 119,411,088 | 16,196 +  | 1 |
| GenelD:72552    | Hsdl1         | 8 | 119,561,978 | 119,575,200 | 13,222 -  | 1 |
| GenelD:68270    | Dnaaf1        | 8 | 119,575,235 | 119,598,454 | 23,219 +  | 2 |
| GenelD:21341    | Taf1c         | 8 | 119,597,974 | 119,605,240 | 7,266 -   | 1 |
| GenelD:628061   | Rps13-ps4     | 8 | 119,602,132 | 119,602,625 | 493 -     | 1 |
| GenelD:75773    | Adad2         | 8 | 119,612,747 | 119,616,926 | 4,179 +   | 1 |
| GenelD:234796   | Klhl36        | 8 | 119,862,305 | 119,876,989 | 14,684 +  | 1 |
| GenelD:22224    | Usp10         | 8 | 119,910,852 | 119,957,557 | 46,705 +  | 1 |
| GenelD:102193   | Zdhhc7        | 8 | 120,081,095 | 120,101,472 | 20,377 -  | 1 |
| GenelD:234797   | 6430548M08Rik | 8 | 120,114,152 | 120,165,307 | 51,155 +  | 1 |
| GenelD:382034   | Gse1          | 8 | 120,488,866 | 120,581,383 | 92,517 +  | 4 |
| GenelD:18117    | Emc8          | 8 | 120,653,914 | 120,668,112 | 14,198 -  | 1 |
| GenelD:12857    | Cox4i1        | 8 | 120,668,290 | 120,674,209 | 5,919 +   | 1 |
| GenelD:234814   | Mthfsd        | 8 | 121,097,557 | 121,108,379 | 10,822 -  | 1 |
| GenelD:14234    | Foxc2         | 8 | 121,116,171 | 121,118,895 | 2,724 +   | 2 |
| GenelD:14241    | Foxl1         | 8 | 121,127,685 | 121,130,644 | 2,959 +   | 2 |
| GenelD:142682   | Zcchc14       | 8 | 121,598,703 | 121,651,933 | 53,230 -  | 2 |
| GenelD:234825   | Klhdc4        | 8 | 121,796,308 | 121,829,569 | 33,261 -  | 1 |
| GenelD:20539    | Slc7a5        | 8 | 121,881,146 | 121,907,686 | 26,540 -  | 1 |
| GenelD:407789   | BC048644      | 8 | 121,907,833 | 121,918,428 | 10,595 +  | 2 |
| GenelD:12352    | Car5a         | 8 | 121,916,135 | 121,944,912 | 28,777 -  | 3 |
| GenelD:53325    | Banp          | 8 | 121,950,533 | 122,029,258 | 78,725 +  | 1 |
| GenelD:195209   | Gm22          | 8 | 122,260,067 | 122,272,650 | 12,583 +  | 1 |
| GenelD:22761    | Zfpm1         | 8 | 122,282,141 | 122,337,247 | 55,106 +  | 3 |
| GenelD:76014    | Zc3h18        | 8 | 122,376,616 | 122,417,360 | 40,744 +  | 1 |
| GenelD:68718    | Rnf166        | 8 | 122,466,147 | 122,476,064 | 9,917 -   | 1 |
| GenelD:66965    | Ctu2          | 8 | 122,476,143 | 122,483,092 | 6,949 +   | 1 |
| GenelD:234839   | Piezo1        | 8 | 122,481,698 | 122,551,329 | 69,631 -  | 2 |
| GenelD:67177    | Cdt1          | 8 | 122,568,015 | 122,573,130 | 5,115 +   | 2 |
| GenelD:11821    | Aprt          | 8 | 122,574,637 | 122,576,907 | 2,270 -   | 2 |
| GenelD:50917    | Galns         | 8 | 122,578,237 | 122,611,487 | 33,250 -  | 2 |
| GenelD:12398    | Cbfa2t3       | 8 | 122,625,136 | 122,699,109 | 73,973 -  | 1 |
| GenelD:77087    | Ankrd11       | 8 | 122,883,822 | 123,042,284 | 158,462 - | 1 |
| GenelD:10050317 | 2810013P06Rik | 8 | 123,042,575 | 123,044,602 | 2,027 +   | 1 |
| GenelD:234847   | Spg7          | 8 | 123,065,508 | 123,097,751 | 32,243 +  | 2 |
| GenelD:270106   | Rpl13         | 8 | 123,102,350 | 123,105,244 | 2,894 +   | 1 |
| GenelD:10030256 | Snord68       | 8 | 123,103,058 | 123,103,105 | 47 +      | 1 |

|                 |               |   |             |             |           |   |
|-----------------|---------------|---|-------------|-------------|-----------|---|
| GenelD:234852   | Chmp1a        | 8 | 123,204,261 | 123,212,788 | 8,527 -   | 1 |
| GenelD:10050321 | Rps12-ps9     | 8 | 123,206,531 | 123,207,036 | 505 +     | 1 |
| GenelD:320869   | 4732415M23Rik | 8 | 123,212,858 | 123,222,045 | 9,187 +   | 2 |
| GenelD:234854   | Cdk10         | 8 | 123,224,841 | 123,232,256 | 7,415 +   | 2 |
| GenelD:78779    | Spata2l       | 8 | 123,232,258 | 123,236,209 | 3,951 -   | 2 |
| GenelD:71186    | 4933417D19Rik | 8 | 123,235,091 | 123,242,359 | 7,268 +   | 2 |
| GenelD:72325    | Vps9d1        | 8 | 123,242,356 | 123,254,175 | 11,819 -  | 2 |
| GenelD:57247    | Zfp276        | 8 | 123,254,195 | 123,270,551 | 16,356 +  | 1 |
| GenelD:234857   | Spire2        | 8 | 123,332,713 | 123,369,518 | 36,805 +  | 2 |
| GenelD:66855    | Tcf25         | 8 | 123,373,753 | 123,404,173 | 30,420 +  | 1 |
| GenelD:114896   | Afg3l1        | 8 | 123,477,862 | 123,503,916 | 26,054 +  | 1 |
| GenelD:69581    | Rhou          | 8 | 123,653,929 | 123,663,880 | 9,951 +   | 1 |
| GenelD:73420    | Ccsap         | 8 | 123,840,844 | 123,860,209 | 19,365 -  | 1 |
| GenelD:234865   | Nup133        | 8 | 123,897,123 | 123,949,265 | 52,142 -  | 1 |
| GenelD:56199    | Abcb10        | 8 | 123,952,459 | 123,983,122 | 30,663 -  | 2 |
| GenelD:108148   | Galnt2        | 8 | 124,231,394 | 124,345,722 | 114,328 + | 1 |
| GenelD:209966   | Pgbd5         | 8 | 124,369,049 | 124,433,936 | 64,887 -  | 1 |
| GenelD:76332    | Cog2          | 8 | 124,520,767 | 124,552,008 | 31,241 +  | 1 |
| GenelD:69551    | 2310022B05Rik | 8 | 124,635,756 | 124,663,369 | 27,613 -  | 1 |
| GenelD:234875   | Ttc13         | 8 | 124,671,327 | 124,721,975 | 50,648 -  | 1 |
| GenelD:330863   | Trim67        | 8 | 124,793,019 | 124,834,704 | 41,685 +  | 1 |
| GenelD:66523    | 2810004N23Rik | 8 | 124,839,355 | 124,863,029 | 23,674 -  | 1 |
| GenelD:14712    | Gnpat         | 8 | 124,863,033 | 124,890,057 | 27,024 +  | 2 |
| GenelD:102058   | Exoc8         | 8 | 124,890,299 | 124,897,705 | 7,406 -   | 1 |
| GenelD:244666   | Sprtn         | 8 | 124,897,886 | 124,903,813 | 5,927 +   | 1 |
| GenelD:112405   | Egln1         | 8 | 124,908,587 | 124,949,254 | 40,667 -  | 2 |
| GenelD:53424    | Tsnax         | 8 | 125,012,997 | 125,034,192 | 21,195 +  | 1 |
| GenelD:10105607 | LOC101056077  | 8 | 125,516,931 | 125,569,703 | 52,772 -  | 2 |
| GenelD:74393    | Map10         | 8 | 125,669,818 | 125,673,365 | 3,547 +   | 1 |
| GenelD:234878   | BC021891      | 8 | 125,910,450 | 125,947,439 | 36,989 +  | 1 |
| GenelD:210027   | Slc35f3       | 8 | 126,298,579 | 126,395,978 | 97,399 +  | 1 |
| GenelD:67892    | Coa6          | 8 | 126,422,501 | 126,425,435 | 2,934 +   | 1 |
| GenelD:212728   | Gm17296       | 8 | 126,426,652 | 126,475,065 | 48,413 -  | 2 |
| GenelD:270110   | Irf2bp2       | 8 | 126,588,296 | 126,593,436 | 5,140 -   | 4 |
| GenelD:93742    | Pard3         | 8 | 127,064,056 | 127,612,286 | 548,230 + | 1 |
| GenelD:18186    | Nrp1          | 8 | 128,359,073 | 128,505,476 | 146,403 + | 1 |
| GenelD:10031668 | Mir1903       | 8 | 128,359,241 | 128,359,320 | 79 +      | 1 |
| GenelD:234889   | Gucy1a2       | 9 | 3,532,349   | 3,905,791   | 373,442 + | 1 |
| GenelD:110350   | Dync2h1       | 9 | 6,928,503   | 7,177,046   | 248,543 - | 1 |
| GenelD:76863    | Dcun1d5       | 9 | 7,184,566   | 7,207,031   | 22,465 +  | 1 |
| GenelD:71929    | Tmem123       | 9 | 7,764,077   | 7,794,333   | 30,256 +  | 1 |
| GenelD:22601    | Yap1          | 9 | 7,931,999   | 8,004,596   | 72,597 -  | 1 |
| GenelD:18667    | Pgr           | 9 | 8,899,833   | 8,968,611   | 68,778 +  | 1 |
| GenelD:71544    | Arhgap42      | 9 | 8,994,953   | 9,239,013   | 244,060 - | 1 |
| GenelD:10057915 | Gm16833       | 9 | 9,236,288   | 9,260,885   | 24,597 +  | 1 |
| GenelD:74360    | Cep57         | 9 | 13,807,788  | 13,827,107  | 19,319 -  | 1 |
| GenelD:72826    | Fam76b        | 9 | 13,827,727  | 13,846,522  | 18,795 +  | 1 |

|                 |               |   |            |            |          |   |
|-----------------|---------------|---|------------|------------|----------|---|
| GenelD:75747    | Sesn3         | 9 | 14,276,301 | 14,326,134 | 49,833 + | 1 |
| GenelD:71946    | Endod1        | 9 | 14,353,990 | 14,381,242 | 27,252 - | 1 |
| GenelD:244694   | Kdm4d         | 9 | 14,462,581 | 14,500,482 | 37,901 - | 1 |
| GenelD:66070    | Cwc15         | 9 | 14,500,619 | 14,510,620 | 10,001 + | 1 |
| GenelD:14608    | Gpr83         | 9 | 14,860,254 | 14,869,499 | 9,245 +  | 1 |
| GenelD:55991    | Panx1         | 9 | 15,005,785 | 15,045,478 | 39,693 - | 1 |
| GenelD:244698   | Heph11        | 9 | 15,051,841 | 15,112,108 | 60,267 - | 1 |
| GenelD:70984    | 4931406C07Rik | 9 | 15,283,337 | 15,306,448 | 23,111 - | 1 |
| GenelD:75316    | Taf1d         | 9 | 15,306,214 | 15,316,997 | 10,783 + | 1 |
| GenelD:319675   | 5830418K08Rik | 9 | 15,316,914 | 15,357,788 | 40,874 - | 1 |
| GenelD:234967   | Slc36a4       | 9 | 15,709,769 | 15,738,789 | 29,020 + | 1 |
| GenelD:235028   | Zfp426        | 9 | 20,468,549 | 20,492,746 | 24,197 - | 1 |
| GenelD:77519    | Zfp266        | 9 | 20,495,068 | 20,521,419 | 26,351 - | 2 |
| GenelD:30843    | Fbxl12        | 9 | 20,637,786 | 20,644,767 | 6,981 -  | 2 |
| GenelD:66177    | Ubl5          | 9 | 20,643,318 | 20,646,789 | 3,471 +  | 2 |
| GenelD:23988    | Pin1          | 9 | 20,652,130 | 20,666,584 | 14,454 + | 2 |
| GenelD:319278   | A230050P20Rik | 9 | 20,868,642 | 20,874,307 | 5,665 +  | 1 |
| GenelD:70726    | Angptl6       | 9 | 20,873,809 | 20,879,710 | 5,901 -  | 2 |
| GenelD:235036   | Ppan          | 9 | 20,888,175 | 20,892,179 | 4,004 +  | 3 |
| GenelD:53356    | Eif3g         | 9 | 20,894,349 | 20,898,590 | 4,241 -  | 3 |
| GenelD:13433    | Dnmt1         | 9 | 20,907,206 | 20,959,888 | 52,682 - | 1 |
| GenelD:14739    | S1pr2         | 9 | 20,965,952 | 20,976,793 | 10,841 - | 1 |
| GenelD:66163    | Mrpl4         | 9 | 21,002,737 | 21,008,839 | 6,102 +  | 1 |
| GenelD:15894    | Icam1         | 9 | 21,015,960 | 21,028,797 | 12,837 + | 2 |
| GenelD:78369    | Icam4         | 9 | 21,029,373 | 21,030,531 | 1,158 +  | 2 |
| GenelD:15898    | Icam5         | 9 | 21,032,038 | 21,039,036 | 6,998 +  | 2 |
| GenelD:10031668 | Mir1900       | 9 | 21,032,251 | 21,032,328 | 77 -     | 2 |
| GenelD:10105575 | LOC101055759  | 9 | 21,034,290 | 21,037,782 | 3,492 -  | 2 |
| GenelD:10000960 | Zglp1         | 9 | 21,062,393 | 21,067,093 | 4,700 -  | 1 |
| GenelD:10056845 | Raver1-fdx1l  | 9 | 21,067,514 | 21,092,008 | 24,494 - | 2 |
| GenelD:68165    | Fdx1l         | 9 | 21,067,520 | 21,073,514 | 5,994 -  | 1 |
| GenelD:71766    | Raver1        | 9 | 21,074,158 | 21,091,988 | 17,830 - | 2 |
| GenelD:18577    | Pde4a         | 9 | 21,165,714 | 21,213,248 | 47,534 + | 1 |
| GenelD:10050356 | Gm16754       | 9 | 21,225,371 | 21,232,640 | 7,269 +  | 2 |
| GenelD:50868    | Keap1         | 9 | 21,229,730 | 21,239,332 | 9,602 -  | 3 |
| GenelD:94226    | S1pr5         | 9 | 21,242,917 | 21,248,443 | 5,526 -  | 3 |
| GenelD:16201    | Ilf3          | 9 | 21,368,003 | 21,405,361 | 37,358 + | 1 |
| GenelD:330902   | Gm16853       | 9 | 21,405,242 | 21,411,720 | 6,478 -  | 1 |
| GenelD:60507    | Qtrt1         | 9 | 21,411,837 | 21,420,279 | 8,442 +  | 2 |
| GenelD:13430    | Dnm2          | 9 | 21,424,908 | 21,507,759 | 82,851 + | 1 |
| GenelD:10031671 | Mir1946b      | 9 | 21,613,444 | 21,613,576 | 132 -    | 1 |
| GenelD:20586    | Smarca4       | 9 | 21,616,169 | 21,704,230 | 88,061 + | 1 |
| GenelD:16835    | Ldlr          | 9 | 21,723,576 | 21,749,919 | 26,343 + | 1 |
| GenelD:235041   | Kank2         | 9 | 21,766,773 | 21,798,546 | 31,773 - | 2 |
| GenelD:319899   | Dock6         | 9 | 21,800,180 | 21,852,635 | 52,455 - | 3 |
| GenelD:66962    | Swsap1        | 9 | 21,955,753 | 21,958,270 | 2,517 +  | 1 |
| GenelD:13857    | Epor          | 9 | 21,958,899 | 21,963,576 | 4,677 -  | 1 |

|                 |               |   |            |            |           |   |
|-----------------|---------------|---|------------|------------|-----------|---|
| GenelD:319601   | Zfp653        | 9 | 22,055,460 | 22,071,345 | 15,885 -  | 1 |
| GenelD:10050365 | Gm16845       | 9 | 22,071,002 | 22,086,131 | 15,129 +  | 1 |
| GenelD:26940    | Ecsit         | 9 | 22,072,246 | 22,085,427 | 13,181 -  | 1 |
| GenelD:12797    | Cnn1          | 9 | 22,099,253 | 22,109,221 | 9,968 +   | 1 |
| GenelD:66126    | Elof1         | 9 | 22,112,989 | 22,114,169 | 1,180 -   | 1 |
| GenelD:11433    | Acp5          | 9 | 22,126,727 | 22,135,746 | 9,019 -   | 1 |
| GenelD:68743    | Anln          | 9 | 22,331,214 | 22,389,206 | 57,992 -  | 1 |
| GenelD:55934    | Rp9           | 9 | 22,448,311 | 22,468,356 | 20,045 -  | 1 |
| GenelD:319845   | Bbs9          | 9 | 22,475,715 | 22,888,280 | 412,565 + | 1 |
| GenelD:80517    | Herpud2       | 9 | 25,108,130 | 25,151,781 | 43,651 -  | 1 |
| GenelD:235072   | Sept7         | 9 | 25,252,439 | 25,308,571 | 56,132 +  | 1 |
| GenelD:69091    | Vps26b        | 9 | 27,004,502 | 27,030,094 | 25,592 -  | 1 |
| GenelD:78658    | Ncapd3        | 9 | 27,030,175 | 27,095,315 | 65,140 +  | 1 |
| GenelD:102607   | Snx19         | 9 | 30,427,329 | 30,466,726 | 39,397 +  | 1 |
| GenelD:10105579 | LOC101055798  | 9 | 30,954,087 | 31,031,205 | 77,118 -  | 1 |
| GenelD:235132   | Zbtb44        | 9 | 31,030,644 | 31,075,885 | 45,241 +  | 1 |
| GenelD:19143    | St14          | 9 | 31,088,590 | 31,131,799 | 43,209 -  | 1 |
| GenelD:11804    | Aplp2         | 9 | 31,149,557 | 31,211,815 | 62,258 -  | 1 |
| GenelD:23871    | Ets1          | 9 | 32,696,042 | 32,757,820 | 61,778 +  | 1 |
| GenelD:20443    | St3gal4       | 9 | 35,046,579 | 35,116,810 | 70,231 -  | 1 |
| GenelD:78934    | 4930581F22Rik | 9 | 35,116,728 | 35,130,922 | 14,194 +  | 1 |
| GenelD:69305    | Dcps          | 9 | 35,124,414 | 35,175,987 | 51,573 -  | 1 |
| GenelD:235169   | Foxred1       | 9 | 35,204,208 | 35,210,925 | 6,717 -   | 1 |
| GenelD:67398    | Srpr          | 9 | 35,211,203 | 35,217,003 | 5,800 +   | 1 |
| GenelD:109229   | Fam118b       | 9 | 35,216,965 | 35,267,780 | 50,815 -  | 1 |
| GenelD:67049    | Pus3          | 9 | 35,559,466 | 35,567,400 | 7,934 +   | 1 |
| GenelD:76832    | Hyls1         | 9 | 35,560,821 | 35,570,069 | 9,248 -   | 1 |
| GenelD:627480   | Gm6762        | 9 | 35,573,637 | 35,574,665 | 1,028 -   | 1 |
| GenelD:12649    | Chek1         | 9 | 36,708,482 | 36,726,658 | 18,176 -  | 1 |
| GenelD:16430    | Stt3a         | 9 | 36,732,413 | 36,767,578 | 35,165 -  | 1 |
| GenelD:13663    | Ei24          | 9 | 36,779,153 | 36,797,393 | 18,240 -  | 1 |
| GenelD:208076   | Pknox2        | 9 | 36,890,982 | 37,147,314 | 256,332 - | 2 |
| GenelD:72927    | Hepacam       | 9 | 37,367,606 | 37,386,572 | 18,966 +  | 1 |
| GenelD:235184   | Msantd2       | 9 | 37,489,321 | 37,524,165 | 34,844 +  | 1 |
| GenelD:258608   | Olfr986       | 9 | 40,187,079 | 40,188,094 | 1,015 +   | 1 |
| GenelD:80902    | Zfp202        | 9 | 40,192,316 | 40,213,604 | 21,288 +  | 1 |
| GenelD:235283   | Gramd1b       | 9 | 40,297,907 | 40,455,764 | 157,857 - | 1 |
| GenelD:71566    | Clmp          | 9 | 40,685,964 | 40,784,046 | 98,082 +  | 1 |
| GenelD:15481    | Hspa8         | 9 | 40,801,273 | 40,805,199 | 3,926 +   | 1 |
| GenelD:108637   | Snord14c      | 9 | 40,803,583 | 40,803,669 | 86 +      | 1 |
| GenelD:10030259 | Snord14d      | 9 | 40,803,995 | 40,804,081 | 86 +      | 1 |
| GenelD:10030259 | Snord14e      | 9 | 40,804,748 | 40,804,838 | 90 +      | 1 |
| GenelD:72828    | Ubash3b       | 9 | 41,013,641 | 41,157,494 | 143,853 - | 1 |
| GenelD:69632    | Arhgef12      | 9 | 42,963,842 | 43,105,718 | 141,876 - | 1 |
| GenelD:10105588 | LOC101055886  | 9 | 43,097,185 | 43,100,345 | 3,160 -   | 1 |
| GenelD:235300   | Tmem136       | 9 | 43,108,653 | 43,116,570 | 7,917 -   | 1 |
| GenelD:102644   | Oaf           | 9 | 43,221,278 | 43,239,816 | 18,538 -  | 1 |

|                 |               |   |            |            |           |   |
|-----------------|---------------|---|------------|------------|-----------|---|
| GenelD:58235    | Pvrl1         | 9 | 43,744,576 | 43,807,461 | 62,885 +  | 1 |
| GenelD:21838    | Thy1          | 9 | 44,043,384 | 44,048,579 | 5,195 +   | 1 |
| GenelD:235312   | C1qtnf5       | 9 | 44,101,770 | 44,109,187 | 7,417 +   | 1 |
| GenelD:259172   | Mfrp          | 9 | 44,101,770 | 44,109,187 | 7,417 +   | 1 |
| GenelD:213211   | Rnf26         | 9 | 44,110,781 | 44,113,051 | 2,270 -   | 1 |
| GenelD:10003856 | Gm10687       | 9 | 44,123,768 | 44,134,485 | 10,717 -  | 2 |
| GenelD:84004    | Mcam          | 9 | 44,134,658 | 44,142,726 | 8,068 +   | 2 |
| GenelD:12402    | Cbl           | 9 | 44,149,262 | 44,234,046 | 84,784 -  | 1 |
| GenelD:270150   | Ccdc153       | 9 | 44,240,677 | 44,247,306 | 6,629 +   | 1 |
| GenelD:192663   | Abcg4         | 9 | 44,273,190 | 44,288,244 | 15,054 -  | 1 |
| GenelD:102423   | Hinfp         | 9 | 44,295,673 | 44,305,671 | 9,998 -   | 1 |
| GenelD:71764    | C2cd2l        | 9 | 44,309,237 | 44,320,282 | 11,045 -  | 2 |
| GenelD:13478    | Dpagt1        | 9 | 44,326,845 | 44,333,600 | 6,755 +   | 3 |
| GenelD:15270    | H2afx         | 9 | 44,334,715 | 44,336,077 | 1,362 +   | 2 |
| GenelD:15288    | Hmbs          | 9 | 44,336,348 | 44,344,228 | 7,880 -   | 2 |
| GenelD:12282    | Hyou1         | 9 | 44,379,490 | 44,392,369 | 12,879 +  | 1 |
| GenelD:14385    | Slc37a4       | 9 | 44,398,176 | 44,402,966 | 4,790 +   | 1 |
| GenelD:60409    | Trappc4       | 9 | 44,403,759 | 44,407,548 | 3,789 -   | 1 |
| GenelD:75617    | Rps25         | 9 | 44,407,714 | 44,410,406 | 2,692 +   | 1 |
| GenelD:382073   | Ccdc84        | 9 | 44,410,163 | 44,418,007 | 7,844 -   | 1 |
| GenelD:10050419 | Gm10023       | 9 | 44,477,931 | 44,479,759 | 1,828 -   | 3 |
| GenelD:13209    | Ddx6          | 9 | 44,604,892 | 44,640,731 | 35,839 +  | 1 |
| GenelD:102693   | Phldb1        | 9 | 44,686,308 | 44,735,198 | 48,890 -  | 1 |
| GenelD:213827   | Arcn1         | 9 | 44,742,143 | 44,767,808 | 25,665 -  | 2 |
| GenelD:76568    | Ift46         | 9 | 44,773,009 | 44,792,714 | 19,705 +  | 2 |
| GenelD:71687    | Tmem25        | 9 | 44,793,779 | 44,799,216 | 5,437 -   | 1 |
| GenelD:192653   | Ttc36         | 9 | 44,799,400 | 44,802,951 | 3,551 -   | 1 |
| GenelD:214162   | Mll1          | 9 | 44,803,355 | 44,881,274 | 77,919 -  | 2 |
| GenelD:74602    | 4833428L15Rik | 9 | 45,416,626 | 45,431,232 | 14,606 -  | 1 |
| GenelD:114873   | Dscaml1       | 9 | 45,430,293 | 45,753,713 | 323,420 + | 1 |
| GenelD:235315   | Rnf214        | 9 | 45,863,691 | 45,906,877 | 43,186 -  | 1 |
| GenelD:18554    | Pcsk7         | 9 | 45,906,569 | 45,929,723 | 23,154 +  | 1 |
| GenelD:214597   | Sidt2         | 9 | 45,937,875 | 45,955,249 | 17,374 -  | 1 |
| GenelD:18475    | Pafah1b2      | 9 | 45,965,311 | 45,984,871 | 19,560 -  | 2 |
| GenelD:70661    | Sik3          | 9 | 46,012,820 | 46,224,194 | 211,374 + | 2 |
| GenelD:66113    | Apoa5         | 9 | 46,268,608 | 46,271,919 | 3,311 +   | 1 |
| GenelD:22687    | Zfp259        | 9 | 46,273,064 | 46,282,643 | 9,579 +   | 1 |
| GenelD:215051   | Bud13         | 9 | 46,283,012 | 46,298,783 | 15,771 +  | 1 |
| GenelD:54725    | Cadm1         | 9 | 47,530,352 | 47,853,385 | 323,033 + | 1 |
| GenelD:235323   | Usp28         | 9 | 48,985,385 | 49,042,517 | 57,132 +  | 1 |
| GenelD:235330   | Ttc12         | 9 | 49,436,961 | 49,486,225 | 49,264 -  | 1 |
| GenelD:17967    | Ncam1         | 9 | 49,502,138 | 49,799,069 | 296,931 - | 1 |
| GenelD:19286    | Pts           | 9 | 50,521,617 | 50,528,641 | 7,024 -   | 1 |
| GenelD:170752   | Bco2          | 9 | 50,533,087 | 50,555,138 | 22,051 -  | 1 |
| GenelD:270156   | AU019823      | 9 | 50,605,240 | 50,617,464 | 12,224 -  | 1 |
| GenelD:72614    | Pih1d2        | 9 | 50,617,321 | 50,625,000 | 7,679 +   | 1 |
| GenelD:235339   | Dlat          | 9 | 50,634,633 | 50,659,780 | 25,147 -  | 1 |

|                 |               |   |            |            |           |   |
|-----------------|---------------|---|------------|------------|-----------|---|
| GenelD:330938   | Dixdc1        | 9 | 50,662,752 | 50,727,984 | 65,232 -  | 1 |
| GenelD:68721    | 1110032A03Rik | 9 | 50,762,828 | 50,768,152 | 5,324 -   | 1 |
| GenelD:382137   | Fdxacb1       | 9 | 50,768,238 | 50,772,670 | 4,432 +   | 1 |
| GenelD:102580   | Alg9          | 9 | 50,775,225 | 50,843,639 | 68,414 +  | 1 |
| GenelD:73699    | Ppp2r1b       | 9 | 50,856,935 | 50,894,229 | 37,294 +  | 1 |
| GenelD:235344   | Sik2          | 9 | 50,892,801 | 51,009,073 | 116,272 - | 1 |
| GenelD:10050294 | Gm684         | 9 | 51,270,258 | 51,278,554 | 8,296 -   | 1 |
| GenelD:244867   | Arhgap20      | 9 | 51,765,352 | 51,853,059 | 87,707 +  | 1 |
| GenelD:14148    | Fdx1          | 9 | 51,943,307 | 51,963,533 | 20,226 -  | 1 |
| GenelD:19684    | Rdx           | 9 | 52,047,150 | 52,088,738 | 41,588 +  | 1 |
| GenelD:244871   | Zc3h12c       | 9 | 52,111,985 | 52,168,111 | 56,126 -  | 1 |
| GenelD:320051   | Exph5         | 9 | 53,301,670 | 53,381,158 | 79,488 +  | 1 |
| GenelD:68304    | Kdelc2        | 9 | 53,384,023 | 53,401,867 | 17,844 +  | 1 |
| GenelD:11920    | Atm           | 9 | 53,437,122 | 53,536,671 | 99,549 -  | 1 |
| GenelD:244879   | Npat          | 9 | 53,537,047 | 53,575,627 | 38,580 +  | 1 |
| GenelD:110446   | Acat1         | 9 | 53,580,522 | 53,610,350 | 29,828 -  | 1 |
| GenelD:75717    | Cul5          | 9 | 53,614,582 | 53,667,507 | 52,925 -  | 2 |
| GenelD:244882   | Tnfaip8l3     | 9 | 54,025,606 | 54,068,411 | 42,805 -  | 1 |
| GenelD:235380   | Dmxi2         | 9 | 54,365,158 | 54,501,626 | 136,468 - | 1 |
| GenelD:58233    | Dnaja4        | 9 | 54,699,559 | 54,716,317 | 16,758 +  | 1 |
| GenelD:64602    | Ireb2         | 9 | 54,863,755 | 54,912,534 | 48,779 +  | 1 |
| GenelD:235386   | Agphd1        | 9 | 54,917,290 | 54,949,924 | 32,634 +  | 1 |
| GenelD:246735   | AY074887      | 9 | 54,950,244 | 54,950,954 | 710 -     | 1 |
| GenelD:26441    | Psma4         | 9 | 54,950,859 | 54,958,030 | 7,171 +   | 1 |
| GenelD:110834   | Chrna3        | 9 | 55,011,343 | 55,026,559 | 15,216 -  | 1 |
| GenelD:108015   | Chrn4         | 9 | 55,028,156 | 55,048,544 | 20,388 -  | 1 |
| GenelD:109161   | Ube2q2        | 9 | 55,149,369 | 55,207,529 | 58,160 +  | 1 |
| GenelD:71999    | Fbxo22        | 9 | 55,208,935 | 55,224,433 | 15,498 +  | 1 |
| GenelD:110842   | Etfa          | 9 | 55,454,436 | 55,512,243 | 57,807 -  | 1 |
| GenelD:104360   | Isl2          | 9 | 55,541,149 | 55,546,178 | 5,029 +   | 1 |
| GenelD:244891   | Scaper        | 9 | 55,549,883 | 55,938,115 | 388,232 - | 2 |
| GenelD:26611    | Rcn2          | 9 | 56,041,845 | 56,059,083 | 17,238 +  | 1 |
| GenelD:56434    | Tspan3        | 9 | 56,135,884 | 56,161,070 | 25,186 -  | 1 |
| GenelD:235402   | Lingo1        | 9 | 56,618,475 | 56,685,253 | 66,778 -  | 2 |
| GenelD:121021   | Cspg4         | 9 | 56,865,104 | 56,899,870 | 34,766 +  | 1 |
| GenelD:235406   | Snx33         | 9 | 56,917,200 | 56,928,371 | 11,171 -  | 2 |
| GenelD:102462   | Imp3          | 9 | 56,937,500 | 56,938,398 | 898 +     | 1 |
| GenelD:56294    | Ptpn9         | 9 | 56,994,968 | 57,062,808 | 67,840 +  | 2 |
| GenelD:10003856 | Gm10658       | 9 | 57,056,897 | 57,071,966 | 15,069 -  | 2 |
| GenelD:20466    | Sin3a         | 9 | 57,072,040 | 57,128,368 | 56,328 +  | 3 |
| GenelD:72588    | 2700012I20Rik | 9 | 57,075,203 | 57,077,307 | 2,104 -   | 2 |
| GenelD:76794    | 2410133F24Rik | 9 | 57,099,950 | 57,131,290 | 31,340 -  | 1 |
| GenelD:73744    | Man2c1        | 9 | 57,130,777 | 57,142,210 | 11,433 +  | 1 |
| GenelD:541610   | Trcg1         | 9 | 57,236,556 | 57,249,864 | 13,308 +  | 1 |
| GenelD:74211    | 1700017B05Rik | 9 | 57,252,322 | 57,262,599 | 10,277 -  | 2 |
| GenelD:102614   | Rpp25         | 9 | 57,504,102 | 57,505,447 | 1,345 +   | 1 |
| GenelD:12858    | Cox5a         | 9 | 57,521,232 | 57,532,427 | 11,195 +  | 2 |

|                 |               |   |            |            |           |   |
|-----------------|---------------|---|------------|------------|-----------|---|
| GenelD:78323    | Fam219b       | 9 | 57,537,528 | 57,543,187 | 5,659 +   | 1 |
| GenelD:110119   | Mpi           | 9 | 57,544,268 | 57,552,752 | 8,484 -   | 1 |
| GenelD:24044    | Scamp2        | 9 | 57,560,944 | 57,588,798 | 27,854 +  | 1 |
| GenelD:71742    | Ulk3          | 9 | 57,589,452 | 57,596,233 | 6,781 +   | 1 |
| GenelD:235415   | Cplx3         | 9 | 57,599,992 | 57,606,281 | 6,289 -   | 1 |
| GenelD:12988    | Csk           | 9 | 57,626,646 | 57,645,180 | 18,534 -  | 1 |
| GenelD:102414   | Clk3          | 9 | 57,750,711 | 57,765,860 | 15,149 -  | 1 |
| GenelD:69459    | Ubl7          | 9 | 57,910,986 | 57,929,968 | 18,982 +  | 1 |
| GenelD:20361    | Sema7a        | 9 | 57,940,135 | 57,962,865 | 22,730 +  | 1 |
| GenelD:20897    | Stra6         | 9 | 58,129,088 | 58,153,997 | 24,909 +  | 1 |
| GenelD:26968    | Islr          | 9 | 58,156,264 | 58,159,221 | 2,957 -   | 1 |
| GenelD:320563   | Islr2         | 9 | 58,196,297 | 58,204,319 | 8,022 -   | 1 |
| GenelD:16949    | Loxl1         | 9 | 58,287,723 | 58,313,212 | 25,489 -  | 1 |
| GenelD:319477   | 6030419C18Rik | 9 | 58,488,603 | 58,499,742 | 11,139 +  | 1 |
| GenelD:102657   | Cd276         | 9 | 58,524,300 | 58,555,033 | 30,733 -  | 1 |
| GenelD:330953   | Hcn4          | 9 | 58,823,512 | 58,860,955 | 37,443 +  | 1 |
| GenelD:18007    | Neo1          | 9 | 58,874,679 | 59,036,441 | 161,762 - | 2 |
| GenelD:23806    | Arih1         | 9 | 59,388,554 | 59,486,374 | 97,820 -  | 1 |
| GenelD:10050437 | Gm20199       | 9 | 59,477,745 | 59,481,741 | 3,996 -   | 1 |
| GenelD:15211    | Hexa          | 9 | 59,539,667 | 59,565,105 | 25,438 +  | 1 |
| GenelD:67287    | Parp6         | 9 | 59,617,284 | 59,650,290 | 33,006 +  | 1 |
| GenelD:18746    | Pkm           | 9 | 59,656,368 | 59,679,375 | 23,007 +  | 1 |
| GenelD:10003849 | Gm10655       | 9 | 61,370,797 | 61,372,193 | 1,396 -   | 3 |
| GenelD:21887    | Tle3          | 9 | 61,372,366 | 61,418,497 | 46,131 +  | 3 |
| GenelD:56040    | Rplp1         | 9 | 61,913,283 | 61,914,510 | 1,227 -   | 1 |
| GenelD:71819    | Kif23         | 9 | 61,917,277 | 61,946,799 | 29,522 -  | 2 |
| GenelD:74090    | Paqr5         | 9 | 61,953,738 | 62,026,790 | 73,052 -  | 1 |
| GenelD:10062860 | Mir5133       | 9 | 62,122,518 | 62,122,594 | 76 -      | 1 |
| GenelD:11737    | Anp32a        | 9 | 62,341,343 | 62,378,802 | 37,459 +  | 2 |
| GenelD:14155    | Fem1b         | 9 | 62,791,824 | 62,811,648 | 19,824 -  | 1 |
| GenelD:56469    | Pias1         | 9 | 62,880,077 | 62,980,879 | 100,802 - | 1 |
| GenelD:207667   | Skor1         | 9 | 63,138,164 | 63,148,961 | 10,797 -  | 1 |
| GenelD:78250    | lqch          | 9 | 63,421,620 | 63,602,448 | 180,828 - | 1 |
| GenelD:66939    | Aagab         | 9 | 63,602,655 | 63,641,889 | 39,234 +  | 1 |
| GenelD:17127    | Smad3         | 9 | 63,646,767 | 63,757,994 | 111,227 - | 1 |
| GenelD:17130    | Smad6         | 9 | 63,953,076 | 64,022,059 | 68,983 -  | 2 |
| GenelD:68014    | Zwilch        | 9 | 64,137,144 | 64,172,931 | 35,787 -  | 1 |
| GenelD:67891    | Rpl4          | 9 | 64,173,387 | 64,178,562 | 5,175 +   | 1 |
| GenelD:10021745 | Snord16a      | 9 | 64,175,432 | 64,175,522 | 90 +      | 1 |
| GenelD:330959   | Snpc5         | 9 | 64,179,297 | 64,182,688 | 3,391 +   | 1 |
| GenelD:26395    | Map2k1        | 9 | 64,185,793 | 64,253,605 | 67,812 -  | 1 |
| GenelD:66131    | Tipin         | 9 | 64,281,607 | 64,304,792 | 23,185 +  | 1 |
| GenelD:213550   | Dis3l         | 9 | 64,306,756 | 64,341,257 | 34,501 -  | 1 |
| GenelD:53869    | Rab11a        | 9 | 64,715,300 | 64,737,756 | 22,456 -  | 1 |
| GenelD:102442   | Dennd4a       | 9 | 64,811,011 | 64,919,667 | 108,656 + | 1 |
| GenelD:57874    | Ptplad1       | 9 | 64,986,983 | 65,021,717 | 34,734 -  | 1 |
| GenelD:56741    | Igdcc4        | 9 | 65,101,495 | 65,137,943 | 36,448 +  | 2 |

|                 |               |   |            |            |           |   |
|-----------------|---------------|---|------------|------------|-----------|---|
| GenelD:19289    | Igdcc3        | 9 | 65,141,189 | 65,185,872 | 44,683 +  | 1 |
| GenelD:214424   | Parp16        | 9 | 65,214,690 | 65,239,219 | 24,529 +  | 1 |
| GenelD:270166   | Clpx          | 9 | 65,294,295 | 65,330,658 | 36,363 +  | 1 |
| GenelD:50996    | Pdcd7         | 9 | 65,346,068 | 65,359,643 | 13,575 +  | 1 |
| GenelD:74492    | Kbtbd13       | 9 | 65,388,684 | 65,391,652 | 2,968 -   | 1 |
| GenelD:70784    | Rasl12        | 9 | 65,398,488 | 65,414,853 | 16,365 +  | 1 |
| GenelD:69606    | Mtfmt         | 9 | 65,435,782 | 65,453,054 | 17,272 +  | 1 |
| GenelD:102595   | Plekho2       | 9 | 65,554,384 | 65,580,034 | 25,650 -  | 2 |
| GenelD:208084   | Pif1          | 9 | 65,587,205 | 65,595,962 | 8,757 +   | 2 |
| GenelD:71973    | Rbpms2        | 9 | 65,630,582 | 65,660,518 | 29,936 +  | 2 |
| GenelD:56404    | Trip4         | 9 | 65,828,926 | 65,908,794 | 79,868 -  | 1 |
| GenelD:68026    | 2810417H13Rik | 9 | 65,890,323 | 65,903,551 | 13,228 +  | 1 |
| GenelD:214897   | Csnk1g1       | 9 | 65,909,010 | 66,045,014 | 136,004 + | 1 |
| GenelD:19035    | Ppib          | 9 | 66,060,169 | 66,066,629 | 6,460 +   | 1 |
| GenelD:382083   | Snx22         | 9 | 66,065,176 | 66,069,731 | 4,555 -   | 1 |
| GenelD:235439   | Herc1         | 9 | 66,350,450 | 66,508,775 | 158,325 + | 1 |
| GenelD:235441   | Usp3          | 9 | 66,517,881 | 66,592,980 | 75,099 -  | 2 |
| GenelD:67941    | Rps27l        | 9 | 66,946,118 | 66,949,509 | 3,391 +   | 1 |
| GenelD:80907    | Lactb         | 9 | 66,955,393 | 66,975,484 | 20,091 -  | 2 |
| GenelD:22003    | Tpm1          | 9 | 67,022,593 | 67,049,213 | 26,620 -  | 3 |
| GenelD:244911   | C2cd4a        | 9 | 67,830,532 | 67,832,330 | 1,798 -   | 1 |
| GenelD:320528   | Vps13c        | 9 | 67,840,396 | 67,995,634 | 155,238 + | 1 |
| GenelD:19883    | Rora          | 9 | 68,653,802 | 69,379,031 | 725,229 + | 2 |
| GenelD:10050266 | LOC100502669  | 9 | 68,655,303 | 68,664,964 | 9,661 +   | 1 |
| GenelD:244913   | Gm4978        | 9 | 69,450,190 | 69,451,054 | 864 -     | 1 |
| GenelD:12306    | Anxa2         | 9 | 69,453,683 | 69,491,785 | 38,102 +  | 1 |
| GenelD:10052656 | Mir3109       | 9 | 69,456,944 | 69,457,031 | 87 +      | 1 |
| GenelD:64290    | Foxb1         | 9 | 69,757,710 | 69,760,940 | 3,230 -   | 1 |
| GenelD:319970   | B230323A14Rik | 9 | 69,761,146 | 69,830,199 | 69,053 +  | 1 |
| GenelD:12175    | Bnip2         | 9 | 69,989,501 | 70,008,317 | 18,816 +  | 2 |
| GenelD:235459   | Gtf2a2        | 9 | 70,012,550 | 70,022,847 | 10,297 +  | 1 |
| GenelD:12442    | Ccnb2         | 9 | 70,407,689 | 70,421,554 | 13,865 -  | 1 |
| GenelD:93836    | Rnf111        | 9 | 70,425,429 | 70,503,725 | 78,296 -  | 1 |
| GenelD:66660    | Sltm          | 9 | 70,542,778 | 70,592,232 | 49,454 +  | 1 |
| GenelD:235461   | Fam63b        | 9 | 70,599,014 | 70,657,174 | 58,160 -  | 1 |
| GenelD:11487    | Adam10        | 9 | 70,679,001 | 70,780,229 | 101,228 + | 1 |
| GenelD:19378    | Aldh1a2       | 9 | 71,215,789 | 71,296,243 | 80,454 +  | 1 |
| GenelD:28015    | Polr2m        | 9 | 71,478,437 | 71,485,983 | 7,546 -   | 1 |
| GenelD:68178    | Cgnl1         | 9 | 71,626,509 | 71,771,602 | 145,093 - | 1 |
| GenelD:21406    | Tcf12         | 9 | 71,844,252 | 72,111,819 | 267,567 - | 1 |
| GenelD:75115    | 4930509E16Rik | 9 | 72,518,250 | 72,531,858 | 13,608 -  | 1 |
| GenelD:319758   | Rfx7          | 9 | 72,532,240 | 72,622,949 | 90,709 +  | 1 |
| GenelD:17999    | Nedd4         | 9 | 72,662,347 | 72,749,848 | 87,501 +  | 1 |
| GenelD:235472   | Prtg          | 9 | 72,807,274 | 72,917,307 | 110,033 + | 2 |
| GenelD:72135    | Pygo1         | 9 | 72,925,650 | 72,946,015 | 20,365 +  | 1 |
| GenelD:66991    | Khdc3         | 9 | 73,102,398 | 73,104,443 | 2,045 +   | 1 |
| GenelD:225215   | Rsl24d1       | 9 | 73,113,469 | 73,123,333 | 9,864 +   | 1 |



|                 |               |   |            |            |           |   |
|-----------------|---------------|---|------------|------------|-----------|---|
| GenelD:10050301 | Gm16551       | 9 | 74,848,437 | 74,852,872 | 4,435 +   | 1 |
| GenelD:15379    | Onecut1       | 9 | 74,861,921 | 74,889,648 | 27,727 +  | 1 |
| GenelD:10004081 | Gm2981        | 9 | 75,061,354 | 75,062,049 | 695 -     | 1 |
| GenelD:17918    | Myo5a         | 9 | 75,071,206 | 75,223,688 | 152,482 + | 1 |
| GenelD:208943   | Myo5c         | 9 | 75,232,014 | 75,305,451 | 73,437 +  | 1 |
| GenelD:14697    | Gnb5          | 9 | 75,311,395 | 75,345,671 | 34,276 +  | 1 |
| GenelD:50772    | Mapk6         | 9 | 75,386,901 | 75,410,014 | 23,113 -  | 2 |
| GenelD:71274    | 4933433G15Rik | 9 | 75,410,184 | 75,415,537 | 5,353 +   | 2 |
| GenelD:50875    | Tmod3         | 9 | 75,497,784 | 75,559,657 | 61,873 -  | 1 |
| GenelD:50876    | Tmod2         | 9 | 75,565,621 | 75,611,325 | 45,704 -  | 2 |
| GenelD:70082    | Lysmd2        | 9 | 75,625,732 | 75,637,773 | 12,041 +  | 1 |
| GenelD:214345   | Lrrc1         | 9 | 77,430,823 | 77,544,852 | 114,029 - | 1 |
| GenelD:10050313 | Gm19569       | 9 | 77,545,224 | 77,546,466 | 1,242 +   | 1 |
| GenelD:14629    | Gclc          | 9 | 77,754,535 | 77,794,489 | 39,954 +  | 1 |
| GenelD:68801    | Elovl5        | 9 | 77,917,365 | 77,984,519 | 67,154 +  | 1 |
| GenelD:71538    | Fbxo9         | 9 | 78,081,499 | 78,109,053 | 27,554 -  | 2 |
| GenelD:56542    | Ick           | 9 | 78,109,192 | 78,172,110 | 62,918 +  | 2 |
| GenelD:214763   | Mb21d1        | 9 | 78,430,518 | 78,443,147 | 12,629 -  | 1 |
| GenelD:68291    | Mto1          | 9 | 78,448,210 | 78,474,152 | 25,942 +  | 2 |
| GenelD:13627    | Eef1a1        | 9 | 78,478,453 | 78,481,724 | 3,271 -   | 1 |
| GenelD:235504   | Slc17a5       | 9 | 78,536,509 | 78,588,027 | 51,518 -  | 1 |
| GenelD:215351   | Senp6         | 9 | 80,066,903 | 80,144,780 | 77,877 +  | 1 |
| GenelD:15551    | Htr1b         | 9 | 81,631,392 | 81,632,552 | 1,160 -   | 1 |
| GenelD:319405   | D430036J16Rik | 9 | 81,631,930 | 81,645,156 | 13,226 +  | 1 |
| GenelD:65099    | Irak1bp1      | 9 | 82,829,806 | 82,847,688 | 17,882 +  | 1 |
| GenelD:83946    | Phip          | 9 | 82,866,159 | 82,975,489 | 109,330 - | 1 |
| GenelD:94353    | Hmgn3         | 9 | 83,109,942 | 83,146,607 | 36,665 -  | 1 |
| GenelD:212531   | Sh3bgrl2      | 9 | 83,548,338 | 83,600,292 | 51,954 +  | 1 |
| GenelD:83603    | Elovl4        | 9 | 83,778,692 | 83,806,305 | 27,613 -  | 1 |
| GenelD:22137    | Ttk           | 9 | 83,834,689 | 83,872,390 | 37,701 +  | 1 |
| GenelD:108837   | Ibtk          | 9 | 85,687,360 | 85,749,334 | 61,974 -  | 1 |
| GenelD:442799   | 9330154J02Rik | 9 | 85,821,526 | 85,843,659 | 22,133 -  | 1 |
| GenelD:21983    | Tpbg          | 9 | 85,842,380 | 85,847,055 | 4,675 +   | 1 |
| GenelD:70348    | Ube2cbp       | 9 | 86,307,234 | 86,464,916 | 157,682 - | 2 |
| GenelD:320615   | Dopey1        | 9 | 86,467,154 | 86,555,806 | 88,652 +  | 2 |
| GenelD:109785   | Pgm3          | 9 | 86,552,476 | 86,571,842 | 19,366 -  | 1 |
| GenelD:69519    | Rwdd2a        | 9 | 86,571,988 | 86,574,899 | 2,911 +   | 1 |
| GenelD:17436    | Me1           | 9 | 86,581,363 | 86,695,914 | 114,551 - | 2 |
| GenelD:319556   | A330041J22Rik | 9 | 86,695,442 | 86,701,253 | 5,811 +   | 1 |
| GenelD:20616    | Snap91        | 9 | 86,765,936 | 86,880,372 | 114,436 - | 1 |
| GenelD:382090   | 4922501C03Rik | 9 | 87,191,963 | 87,255,532 | 63,569 -  | 1 |
| GenelD:23959    | Nt5e          | 9 | 88,327,609 | 88,372,089 | 44,480 +  | 1 |
| GenelD:244962   | Snx14         | 9 | 88,376,747 | 88,438,951 | 62,204 -  | 1 |
| GenelD:56403    | Syncrip       | 9 | 88,449,738 | 88,482,397 | 32,659 -  | 1 |
| GenelD:108153   | Adamts7       | 9 | 90,162,978 | 90,200,102 | 37,124 +  | 1 |
| GenelD:235527   | Plscr4        | 9 | 92,457,378 | 92,492,516 | 35,138 +  | 1 |
| GenelD:78575    | B430319G15Rik | 9 | 92,538,801 | 92,542,869 | 4,068 -   | 1 |

|                 |               |   |             |             |           |   |
|-----------------|---------------|---|-------------|-------------|-----------|---|
| GenelD:26432    | Plod2         | 9 | 92,542,223  | 92,608,428  | 66,205 +  | 1 |
| GenelD:68861    | 1190002N15Rik | 9 | 94,517,864  | 94,538,081  | 20,217 -  | 2 |
| GenelD:54371    | Chst2         | 9 | 95,400,926  | 95,407,270  | 6,344 -   | 2 |
| GenelD:67958    | U2surp        | 9 | 95,456,894  | 95,511,996  | 55,102 -  | 1 |
| GenelD:73410    | 1700065D16Rik | 9 | 95,855,550  | 95,858,320  | 2,770 -   | 1 |
| GenelD:245000   | Atr           | 9 | 95,857,597  | 95,951,644  | 94,047 +  | 1 |
| GenelD:19823    | Rnf7          | 9 | 96,470,957  | 96,478,595  | 7,638 -   | 1 |
| GenelD:114713   | Rasa2         | 9 | 96,539,300  | 96,631,503  | 92,203 -  | 1 |
| GenelD:235534   | Acpl2         | 9 | 96,823,343  | 96,889,422  | 66,079 -  | 1 |
| GenelD:211949   | Spsb4         | 9 | 96,943,482  | 97,018,355  | 74,873 -  | 1 |
| GenelD:10050267 | Gm16010       | 9 | 97,015,966  | 97,022,043  | 6,077 +   | 1 |
| GenelD:192287   | Slc25a36      | 9 | 97,077,011  | 97,111,041  | 34,030 -  | 1 |
| GenelD:74080    | Nmnat3        | 9 | 98,296,583  | 98,411,428  | 114,845 + | 1 |
| GenelD:64655    | Mrps22        | 9 | 98,588,730  | 98,601,679  | 12,949 -  | 1 |
| GenelD:768252   | Foxl2os       | 9 | 98,949,155  | 98,955,310  | 6,155 -   | 1 |
| GenelD:26927    | Foxl2         | 9 | 98,955,607  | 98,958,126  | 2,519 +   | 1 |
| GenelD:623459   | Gm6432        | 9 | 99,229,376  | 99,237,239  | 7,863 -   | 1 |
| GenelD:68121    | Cep70         | 9 | 99,243,468  | 99,300,404  | 56,936 +  | 1 |
| GenelD:272636   | Esyt3         | 9 | 99,309,967  | 99,358,530  | 48,563 -  | 1 |
| GenelD:17532    | Mras          | 9 | 99,385,420  | 99,436,712  | 51,292 -  | 1 |
| GenelD:74125    | Armc8         | 9 | 99,478,391  | 99,568,899  | 90,508 -  | 1 |
| GenelD:83703    | Dbr1          | 9 | 99,575,799  | 99,584,343  | 8,544 +   | 1 |
| GenelD:333424   | A4gnt         | 9 | 99,612,502  | 99,622,367  | 9,865 +   | 1 |
| GenelD:72507    | Dzip1l        | 9 | 99,629,595  | 99,669,256  | 39,661 +  | 1 |
| GenelD:20669    | Sox14         | 9 | 99,874,106  | 99,876,170  | 2,064 -   | 1 |
| GenelD:245020   | Slc35g2       | 9 | 100,552,188 | 100,571,085 | 18,897 -  | 1 |
| GenelD:20842    | Stag1         | 9 | 100,643,623 | 100,958,544 | 314,921 + | 1 |
| GenelD:66904    | Pccb          | 9 | 100,982,038 | 101,034,875 | 52,837 -  | 1 |
| GenelD:77853    | Msl2          | 9 | 101,074,727 | 101,075,419 | 692 +     | 2 |
| GenelD:235542   | Ppp2r3a       | 9 | 101,104,989 | 101,251,832 | 146,843 - | 1 |
| GenelD:56332    | Amotl2        | 9 | 102,717,804 | 102,733,417 | 15,613 +  | 2 |
| GenelD:20187    | Ryk           | 9 | 102,834,920 | 102,908,307 | 73,387 +  | 1 |
| GenelD:235559   | Topbp1        | 9 | 103,305,327 | 103,350,428 | 45,101 +  | 1 |
| GenelD:321022   | Cdv3          | 9 | 103,353,102 | 103,365,780 | 12,678 -  | 1 |
| GenelD:66663    | Uba5          | 9 | 104,046,588 | 104,063,121 | 16,533 -  | 1 |
| GenelD:102632   | Acad11        | 9 | 104,063,703 | 104,127,646 | 63,943 +  | 1 |
| GenelD:235567   | Dnajc13       | 9 | 104,151,597 | 104,262,930 | 111,333 - | 1 |
| GenelD:75686    | Nudt16        | 9 | 105,129,338 | 105,131,805 | 2,467 -   | 1 |
| GenelD:235574   | Atp2c1        | 9 | 105,411,362 | 105,521,257 | 109,895 - | 1 |
| GenelD:77305    | Wdr82         | 9 | 106,170,929 | 106,191,706 | 20,777 +  | 1 |
| GenelD:387249   | Mirlet7g      | 9 | 106,178,840 | 106,178,927 | 87 +      | 1 |
| GenelD:70235    | Poc1a         | 9 | 106,281,061 | 106,349,891 | 68,830 +  | 1 |
| GenelD:235584   | Dusp7         | 9 | 106,368,632 | 106,375,724 | 7,092 +   | 1 |
| GenelD:19944    | Rpl29         | 9 | 106,429,539 | 106,431,567 | 2,028 +   | 1 |
| GenelD:109652   | Acy1          | 9 | 106,432,996 | 106,438,236 | 5,240 -   | 1 |
| GenelD:68644    | Abhd14a       | 9 | 106,440,051 | 106,447,678 | 7,627 -   | 1 |
| GenelD:59092    | Pcbp4         | 9 | 106,453,838 | 106,464,012 | 10,174 +  | 2 |

|                 |          |   |             |             |           |   |
|-----------------|----------|---|-------------|-------------|-----------|---|
| GenelD:436090   | Gpr62    | 9 | 106,463,960 | 106,465,940 | 1,980 -   | 2 |
| GenelD:235587   | Parp3    | 9 | 106,470,353 | 106,476,651 | 6,298 -   | 3 |
| GenelD:27966    | Rrp9     | 9 | 106,477,309 | 106,485,415 | 8,106 +   | 1 |
| GenelD:21767    | Tex264   | 9 | 106,658,746 | 106,685,948 | 27,202 -  | 1 |
| GenelD:81000    | Rad54l2  | 9 | 106,688,080 | 106,789,213 | 101,133 - | 2 |
| GenelD:321006   | Vprbp    | 9 | 106,821,976 | 106,880,992 | 59,016 +  | 1 |
| GenelD:109095   | Rbm15b   | 9 | 106,883,985 | 106,887,000 | 3,015 -   | 2 |
| GenelD:74840    | Manf     | 9 | 106,887,415 | 106,891,938 | 4,523 -   | 2 |
| GenelD:208869   | Dock3    | 9 | 106,892,825 | 107,231,909 | 339,084 - | 2 |
| GenelD:56808    | Cacna2d2 | 9 | 107,399,880 | 107,529,343 | 129,463 + | 1 |
| GenelD:56395    | Tmem115  | 9 | 107,533,945 | 107,538,656 | 4,711 +   | 1 |
| GenelD:56368    | Cyb561d2 | 9 | 107,539,011 | 107,541,865 | 2,854 -   | 2 |
| GenelD:56032    | Nprl2    | 9 | 107,542,209 | 107,545,706 | 3,497 +   | 2 |
| GenelD:114602   | Zmynd10  | 9 | 107,547,310 | 107,551,319 | 4,009 +   | 1 |
| GenelD:56289    | Rassf1   | 9 | 107,551,555 | 107,562,267 | 10,712 +  | 2 |
| GenelD:10003875 | Gm9917   | 9 | 107,562,198 | 107,568,415 | 6,217 -   | 2 |
| GenelD:80385    | Tusc2    | 9 | 107,563,255 | 107,566,108 | 2,853 +   | 1 |
| GenelD:15587    | Hyal2    | 9 | 107,569,163 | 107,572,778 | 3,615 +   | 1 |
| GenelD:15586    | Hyal1    | 9 | 107,576,952 | 107,580,137 | 3,185 +   | 1 |
| GenelD:14678    | Gnai2    | 9 | 107,614,138 | 107,635,342 | 21,204 -  | 2 |
| GenelD:10050348 | Gm19721  | 9 | 107,630,776 | 107,632,539 | 1,763 -   | 2 |
| GenelD:20350    | Sema3f   | 9 | 107,681,502 | 107,710,475 | 28,973 -  | 1 |
| GenelD:83486    | Rbm5     | 9 | 107,740,495 | 107,771,002 | 30,507 -  | 1 |
| GenelD:19654    | Rbm6     | 9 | 107,773,559 | 107,872,819 | 99,260 -  | 2 |
| GenelD:72825    | Mon1a    | 9 | 107,888,129 | 107,903,139 | 15,010 +  | 1 |
| GenelD:19882    | Mst1r    | 9 | 107,906,889 | 107,920,383 | 13,494 +  | 1 |
| GenelD:74153    | Uba7     | 9 | 107,975,567 | 107,984,056 | 8,489 +   | 1 |
| GenelD:68176    | Fam212a  | 9 | 107,984,223 | 107,985,916 | 1,693 -   | 1 |
| GenelD:69398    | Cdhr4    | 9 | 107,992,503 | 107,999,585 | 7,082 +   | 2 |
| GenelD:27399    | Ip6k1    | 9 | 108,002,648 | 108,048,782 | 46,134 +  | 1 |
| GenelD:84585    | Rnf123   | 9 | 108,051,672 | 108,079,375 | 27,703 -  | 1 |
| GenelD:15235    | Mst1     | 9 | 108,080,436 | 108,085,027 | 4,591 +   | 2 |
| GenelD:235606   | Apeh     | 9 | 108,085,414 | 108,094,480 | 9,066 -   | 2 |
| GenelD:12217    | Bsn      | 9 | 108,096,022 | 108,190,383 | 94,361 -  | 2 |
| GenelD:13138    | Dag1     | 9 | 108,205,958 | 108,263,736 | 57,778 -  | 1 |
| GenelD:11848    | Rhoa     | 9 | 108,306,205 | 108,337,939 | 31,734 +  | 2 |
| GenelD:14775    | Gpx1     | 9 | 108,339,080 | 108,340,342 | 1,262 +   | 2 |
| GenelD:22258    | Usp4     | 9 | 108,347,831 | 108,392,529 | 44,698 +  | 2 |
| GenelD:434439   | BC048562 | 9 | 108,436,482 | 108,446,083 | 9,601 +   | 1 |
| GenelD:78267    | Klhdcc8b | 9 | 108,447,639 | 108,461,581 | 13,942 -  | 2 |
| GenelD:72454    | Ccdc71   | 9 | 108,460,518 | 108,465,945 | 5,427 +   | 2 |
| GenelD:16779    | Lamb2    | 9 | 108,479,862 | 108,490,530 | 10,668 +  | 2 |
| GenelD:71472    | Usp19    | 9 | 108,490,676 | 108,502,337 | 11,661 +  | 2 |
| GenelD:97541    | Qars     | 9 | 108,508,005 | 108,515,941 | 7,936 +   | 1 |
| GenelD:69232    | Qrich1   | 9 | 108,517,087 | 108,560,167 | 43,080 +  | 3 |
| GenelD:23918    | Impdh2   | 9 | 108,560,501 | 108,565,573 | 5,072 +   | 2 |
| GenelD:66706    | Ndufaf3  | 9 | 108,565,865 | 108,567,342 | 1,477 -   | 2 |

|                 |          |   |             |             |           |   |
|-----------------|----------|---|-------------|-------------|-----------|---|
| GenelD:387186   | Mir191   | 9 | 108,568,319 | 108,568,392 | 73 +      | 3 |
| GenelD:723864   | Mir425   | 9 | 108,568,777 | 108,568,861 | 84 +      | 3 |
| GenelD:67789    | Dalrd3   | 9 | 108,569,892 | 108,572,771 | 2,879 +   | 3 |
| GenelD:83669    | Wdr6     | 9 | 108,572,313 | 108,578,670 | 6,357 -   | 3 |
| GenelD:74443    | P4htm    | 9 | 108,578,826 | 108,597,600 | 18,774 -  | 3 |
| GenelD:23807    | Arih2    | 9 | 108,602,942 | 108,649,380 | 46,438 -  | 2 |
| GenelD:57279    | Slc25a20 | 9 | 108,662,098 | 108,684,641 | 22,543 +  | 1 |
| GenelD:19087    | Prkar2a  | 9 | 108,692,143 | 108,749,512 | 57,369 +  | 1 |
| GenelD:80987    | Nckipsd  | 9 | 108,808,380 | 108,818,366 | 9,986 +   | 1 |
| GenelD:107934   | Celsr3   | 9 | 108,826,320 | 108,852,969 | 26,649 +  | 2 |
| GenelD:171429   | Slc26a6  | 9 | 108,854,043 | 108,862,143 | 8,100 +   | 1 |
| GenelD:22273    | Uqcrc1   | 9 | 108,936,648 | 108,949,641 | 12,993 +  | 1 |
| GenelD:66658    | Ccdc51   | 9 | 109,082,496 | 109,093,363 | 10,867 +  | 1 |
| GenelD:665413   | Gm7628   | 9 | 109,093,844 | 109,098,474 | 4,630 -   | 1 |
| GenelD:235611   | Plxbn1   | 9 | 109,095,436 | 109,119,915 | 24,479 +  | 1 |
| GenelD:12530    | Cdc25a   | 9 | 109,875,579 | 109,893,890 | 18,311 +  | 1 |
| GenelD:72831    | Dhx30    | 9 | 110,084,319 | 110,117,616 | 33,297 -  | 1 |
| GenelD:10003873 | Gm10615  | 9 | 110,117,703 | 110,120,335 | 2,632 +   | 1 |
| GenelD:20588    | Smarcc1  | 9 | 110,132,024 | 110,240,178 | 108,154 + | 2 |
| GenelD:29873    | Cspg5    | 9 | 110,243,783 | 110,262,576 | 18,793 +  | 1 |
| GenelD:235623   | Scap     | 9 | 110,333,293 | 110,384,946 | 51,653 +  | 1 |
| GenelD:104831   | Ptpn23   | 9 | 110,385,089 | 110,408,210 | 23,121 -  | 2 |
| GenelD:16578    | Kif9     | 9 | 110,476,958 | 110,525,174 | 48,216 +  | 2 |
| GenelD:235626   | Setd2    | 9 | 110,532,597 | 110,618,633 | 86,036 +  | 3 |
| GenelD:67169    | Nradd    | 9 | 110,621,135 | 110,624,393 | 3,258 -   | 1 |
| GenelD:235627   | Nbeal2   | 9 | 110,624,789 | 110,654,161 | 29,372 -  | 1 |
| GenelD:19228    | Pth1r    | 9 | 110,722,085 | 110,747,145 | 25,060 -  | 1 |
| GenelD:74306    | Prss46   | 9 | 110,844,506 | 110,856,522 | 12,016 +  | 1 |
| GenelD:235631   | Prss50   | 9 | 110,857,967 | 110,864,628 | 6,661 +   | 2 |
| GenelD:20776    | Tmie     | 9 | 110,866,046 | 110,880,083 | 14,037 -  | 2 |
| GenelD:235633   | Als2cl   | 9 | 110,880,174 | 110,900,530 | 20,356 +  | 1 |
| GenelD:71268    | Lrrfip2  | 9 | 111,118,111 | 111,225,668 | 107,557 + | 1 |
| GenelD:320429   | Trank1   | 9 | 111,311,739 | 111,395,775 | 84,036 +  | 1 |
| GenelD:18571    | Pdcd6ip  | 9 | 113,651,744 | 113,708,259 | 56,515 -  | 1 |
| GenelD:76499    | Clasp2   | 9 | 113,741,473 | 113,919,697 | 178,224 + | 1 |
| GenelD:22221    | Ubp1     | 9 | 113,930,934 | 113,977,202 | 46,268 +  | 1 |
| GenelD:56693    | Crtap    | 9 | 114,375,131 | 114,390,712 | 15,581 -  | 1 |
| GenelD:235661   | Dync1li1 | 9 | 114,688,831 | 114,723,788 | 34,957 +  | 1 |
| GenelD:102545   | Cmtm7    | 9 | 114,756,836 | 114,781,993 | 25,157 -  | 1 |
| GenelD:70031    | Cmtm8    | 9 | 114,789,345 | 114,844,152 | 54,807 -  | 1 |
| GenelD:333433   | Gpd1l    | 9 | 114,899,339 | 114,933,987 | 34,648 -  | 1 |
| GenelD:10004381 | Gm9846   | 9 | 114,982,366 | 114,982,739 | 373 -     | 1 |
| GenelD:68292    | Stt3b    | 9 | 115,242,581 | 115,310,421 | 67,840 -  | 1 |
| GenelD:21813    | Tgfbr2   | 9 | 116,087,695 | 116,175,363 | 87,668 -  | 1 |
| GenelD:27215    | Azi2     | 9 | 118,040,499 | 118,063,907 | 23,408 +  | 1 |
| GenelD:104099   | Itga9    | 9 | 118,606,709 | 118,901,003 | 294,294 + | 1 |
| GenelD:69274    | Ctdspl   | 9 | 118,926,536 | 119,044,119 | 117,583 + | 1 |

|               |               |   |             |             |           |   |
|---------------|---------------|---|-------------|-------------|-----------|---|
| GenelD:108737 | Oxsr1         | 9 | 119,238,432 | 119,322,427 | 83,995 -  | 1 |
| GenelD:17874  | Myd88         | 9 | 119,335,988 | 119,340,040 | 4,052 -   | 1 |
| GenelD:113868 | Acaa1a        | 9 | 119,341,294 | 119,350,295 | 9,001 +   | 1 |
| GenelD:102448 | Xylb          | 9 | 119,357,381 | 119,393,797 | 36,416 +  | 1 |
| GenelD:11481  | Acvr2b        | 9 | 119,402,501 | 119,433,515 | 31,014 +  | 1 |
| GenelD:208194 | Exog          | 9 | 119,444,923 | 119,465,518 | 20,595 +  | 1 |
| GenelD:67561  | Wdr48         | 9 | 119,894,895 | 119,926,579 | 31,684 +  | 1 |
| GenelD:215418 | Csrnp1        | 9 | 119,971,166 | 119,984,658 | 13,492 -  | 1 |
| GenelD:208638 | Slc25a38      | 9 | 120,110,399 | 120,124,321 | 13,922 +  | 2 |
| GenelD:16785  | Rpsa          | 9 | 120,127,766 | 120,132,369 | 4,603 +   | 1 |
| GenelD:104433 | Snora62       | 9 | 120,130,434 | 120,130,563 | 129 +     | 1 |
| GenelD:546166 | Gm5922        | 9 | 120,133,463 | 120,136,329 | 2,866 -   | 1 |
| GenelD:68969  | Eif1b         | 9 | 120,492,606 | 120,495,327 | 2,721 +   | 1 |
| GenelD:78060  | 4930593C16Rik | 9 | 120,924,455 | 120,930,802 | 6,347 -   | 2 |
| GenelD:12387  | Ctnnb1        | 9 | 120,933,400 | 120,960,507 | 27,107 +  | 2 |
| GenelD:215474 | Sec22c        | 9 | 121,680,045 | 121,705,029 | 24,984 -  | 2 |
| GenelD:26901  | Deb1          | 9 | 121,710,389 | 121,712,921 | 2,532 +   | 2 |
| GenelD:18087  | Nktr          | 9 | 121,719,181 | 121,756,841 | 37,660 +  | 2 |
| GenelD:320301 | E530011L22Rik | 9 | 121,756,640 | 121,759,943 | 3,303 -   | 1 |
| GenelD:270210 | Zfp651        | 9 | 121,760,033 | 121,771,742 | 11,709 +  | 2 |
| GenelD:72330  | Klhl40        | 9 | 121,777,607 | 121,783,819 | 6,212 +   | 1 |
| GenelD:74770  | Hhatl         | 9 | 121,784,016 | 121,792,507 | 8,491 -   | 1 |
| GenelD:56295  | Higd1a        | 9 | 121,848,560 | 121,858,000 | 9,440 -   | 1 |
| GenelD:67469  | Abhd5         | 9 | 122,351,616 | 122,381,523 | 29,907 +  | 1 |
| GenelD:22646  | Zfp105        | 9 | 122,923,078 | 122,931,028 | 7,950 +   | 1 |
| GenelD:66202  | 1110059G10Rik | 9 | 122,945,089 | 122,951,000 | 5,911 -   | 1 |
| GenelD:209737 | Kif15         | 9 | 122,951,081 | 123,018,733 | 67,652 +  | 2 |
| GenelD:66079  | Tmem42        | 9 | 123,021,326 | 123,023,491 | 2,165 +   | 1 |
| GenelD:69035  | Zdhhc3        | 9 | 123,072,310 | 123,113,205 | 40,895 -  | 1 |
| GenelD:66446  | Exosc7        | 9 | 123,113,231 | 123,136,129 | 22,898 +  | 1 |
| GenelD:72309  | Tmem158       | 9 | 123,259,057 | 123,260,789 | 1,732 -   | 1 |
| GenelD:29806  | Limd1         | 9 | 123,478,701 | 123,521,552 | 42,851 +  | 2 |
| GenelD:83493  | Sacm1l        | 9 | 123,529,882 | 123,592,598 | 62,716 +  | 1 |
| GenelD:93730  | Lztfl1        | 9 | 123,697,593 | 123,717,557 | 19,964 -  | 1 |
| GenelD:75135  | 4930526I15Rik | 9 | 124,423,256 | 124,424,856 | 1,600 +   | 1 |
| GenelD:671650 | Gm20783       | 9 | 124,428,076 | 124,440,868 | 12,792 -  | 1 |
| GenelD:12728  | Clcn5         | X | 7,158,412   | 7,319,358   | 160,946 - | 1 |
| GenelD:54646  | Ppp1r3f       | X | 7,558,562   | 7,574,120   | 15,558 -  | 1 |
| GenelD:78185  | 4930524L23Rik | X | 7,573,600   | 7,581,016   | 7,416 +   | 1 |
| GenelD:20371  | Foxp3         | X | 7,579,676   | 7,595,243   | 15,567 +  | 1 |
| GenelD:71458  | Bcor          | X | 12,036,737  | 12,160,355  | 123,618 - | 2 |
| GenelD:22284  | Usp9x         | X | 13,071,498  | 13,173,328  | 101,830 + | 1 |
| GenelD:13205  | Ddx3x         | X | 13,281,022  | 13,293,983  | 12,961 +  | 1 |
| GenelD:11740  | Slc25a5       | X | 36,795,652  | 36,798,806  | 3,154 +   | 1 |
| GenelD:77644  | C330007P06Rik | X | 36,848,543  | 36,864,246  | 15,703 -  | 1 |
| GenelD:22209  | Ube2a         | X | 36,874,366  | 36,884,222  | 9,856 +   | 1 |
| GenelD:50786  | Hs6st2        | X | 51,387,212  | 51,681,602  | 294,390 - | 1 |

|                 |              |   |             |             |           |   |
|-----------------|--------------|---|-------------|-------------|-----------|---|
| GenelD:236790   | Ddx26b       | X | 56,454,839  | 56,507,843  | 53,004 +  | 1 |
| GenelD:15354    | Hmgb3        | X | 71,555,993  | 71,560,654  | 4,661 +   | 1 |
| GenelD:27083    | Xlr4b        | X | 73,214,365  | 73,222,453  | 8,088 +   | 1 |
| GenelD:14070    | F8a          | X | 73,228,306  | 73,230,795  | 2,489 +   | 1 |
| GenelD:72891    | Xlr4c        | X | 73,234,076  | 73,243,130  | 9,054 -   | 1 |
| GenelD:27081    | Zfp275       | X | 73,342,620  | 73,359,080  | 16,460 +  | 1 |
| GenelD:17257    | Mecp2        | X | 74,026,821  | 74,085,636  | 58,815 -  | 1 |
| GenelD:54411    | Atp6ap1      | X | 74,297,097  | 74,304,721  | 7,624 +   | 1 |
| GenelD:14567    | Gdi1         | X | 74,305,012  | 74,311,867  | 6,855 +   | 1 |
| GenelD:108160   | Fam50a       | X | 74,313,033  | 74,320,149  | 7,116 +   | 1 |
| GenelD:21372    | Tbl1x        | X | 77,511,227  | 77,660,265  | 149,038 + | 1 |
| GenelD:11878    | Arx          | X | 93,286,646  | 93,298,357  | 11,711 +  | 1 |
| GenelD:14853    | Gspt2        | X | 94,636,069  | 94,638,562  | 2,493 +   | 1 |
| GenelD:13641    | Efnb1        | X | 99,136,130  | 99,148,991  | 12,861 +  | 1 |
| GenelD:10004248 | Nhsl2        | X | 101,849,385 | 102,092,055 | 242,670 + | 1 |
| GenelD:20102    | Rps4x        | X | 102,184,943 | 102,189,306 | 4,363 -   | 1 |
| GenelD:245555   | C77370       | X | 104,077,435 | 104,201,117 | 123,682 - | 1 |
| GenelD:10105581 | LOC101055819 | X | 151,796,751 | 151,802,263 | 5,512 +   | 1 |
| GenelD:59026    | Huwe1        | X | 151,803,282 | 151,935,417 | 132,135 + | 1 |
| GenelD:58194    | Sh3kbp1      | X | 159,627,408 | 159,975,917 | 348,509 + | 1 |
| GenelD:195727   | Nhs          | X | 161,836,268 | 162,159,790 | 323,522 - | 1 |
| GenelD:245688   | Rbbp7        | X | 162,760,372 | 162,779,090 | 18,718 +  | 1 |
| GenelD:14758    | Gpm6b        | X | 166,238,943 | 166,389,033 | 150,090 + | 1 |
| GenelD:17692    | Msl3         | X | 168,654,117 | 168,673,902 | 19,785 -  | 1 |

anti-ARID4B antibody using the *Arid4b* SCKO testes at P1.5.

| Intervals                     | Interval Dists to Start | Interval Pos         | 1_Test | 1_Teste | ActReg | Peak | Sample           |
|-------------------------------|-------------------------|----------------------|--------|---------|--------|------|------------------|
| 1_Testes_ARID4B:              | -342                    | upstream             | 1      | 18.000  | 1      | 1    | 1_Testes_ARID4B: |
| 1_Testes_ARID4B:              | -8315                   | upstream             | 1      | 18.000  | 1      | 1    | 1_Testes_ARID4B: |
| 1_Testes_ARID4B:              | 62                      | in gene              | 1      | 28.000  | 1      | 1    | 1_Testes_ARID4B: |
| 1_Testes_ARID4B:              | 59                      | in gene              | 1      | 27.000  | 1      | 1    | 1_Testes_ARID4B: |
| 1_Testes_ARID4B:              | 438                     | in gene              | 1      | 22.000  | 1      | 1    | 1_Testes_ARID4B: |
| 1_Testes_ARID4B:              | 90                      | in gene              | 1      | 26.000  | 1      | 1    | 1_Testes_ARID4B: |
| 1_Testes_ARID4B:              | 224                     | in gene              | 1      | 56.000  | 1      | 1    | 1_Testes_ARID4B: |
| 1_Testes_ARID4B:              | -2414                   | upstream             | 1      | 56.000  | 1      | 1    | 1_Testes_ARID4B: |
| 1_Testes_ARID4B:              | 145                     | in gene              | 1      | 23.000  | 1      | 1    | 1_Testes_ARID4B: |
| 1_Testes_ARID4B:              | 222                     | in gene              | 1      | 26.000  | 1      | 1    | 1_Testes_ARID4B: |
| 1_Testes_ARID4B:              | 512                     | in gene              | 1      | 26.000  | 1      | 1    | 1_Testes_ARID4B: |
| 1_Testes_ARID4B:              | 35330                   | downstream           | 1      | 32.000  | 1      | 1    | 1_Testes_ARID4B: |
| 1_Testes_ARID4B:              | 150                     | in gene              | 1      | 32.000  | 1      | 1    | 1_Testes_ARID4B: |
| 1_Testes_ARID4B:              | -1425                   | upstream             | 1      | 32.000  | 1      | 1    | 1_Testes_ARID4B: |
| 1_Testes_ARID4B:              | -4391                   | upstream             | 1      | 21.000  | 1      | 1    | 1_Testes_ARID4B: |
| 1_Testes_ARID4B:              | 285                     | in gene              | 1      | 21.000  | 1      | 1    | 1_Testes_ARID4B: |
| 1_Testes_ARID4B:              | 41930                   | downstream           | 1      | 21.000  | 1      | 1    | 1_Testes_ARID4B: |
| 1_Testes_ARID4B:              | -2198                   | upstream             | 1      | 24.000  | 1      | 1    | 1_Testes_ARID4B: |
| 1_Testes_ARID4B:              | 1878                    | in gene              | 1      | 24.000  | 1      | 1    | 1_Testes_ARID4B: |
| 1_Testes_ARID4B:              | -258                    | upstream             | 1      | 23.000  | 1      | 1    | 1_Testes_ARID4B: |
| 1_Testes_ARID4B:              | 327                     | in gene              | 1      | 25.000  | 1      | 1    | 1_Testes_ARID4B: |
| 1_Testes_ARID4B: 1315, 435    |                         | in gene, in gene     | 1      | 23.000  | 2      | 1    | 1_Testes_ARID4B: |
| 1_Testes_ARID4B:              | 375                     | in gene              | 1      | 21.000  | 1      | 1    | 1_Testes_ARID4B: |
| 1_Testes_ARID4B:              | 82                      | in gene              | 1      | 22.000  | 1      | 1    | 1_Testes_ARID4B: |
| 1_Testes_ARID4B:              | -1167                   | upstream             | 1      | 41.000  | 1      | 1    | 1_Testes_ARID4B: |
| 1_Testes_ARID4B:              | -282                    | upstream             | 1      | 41.000  | 1      | 1    | 1_Testes_ARID4B: |
| 1_Testes_ARID4B:              | 266                     | in gene              | 1      | 27.000  | 1      | 1    | 1_Testes_ARID4B: |
| 1_Testes_ARID4B:              | 385                     | in gene              | 1      | 25.000  | 1      | 1    | 1_Testes_ARID4B: |
| 1_Testes_ARID4B:              | 69                      | in gene              | 1      | 28.000  | 1      | 1    | 1_Testes_ARID4B: |
| 1_Testes_ARID4B:              | 185                     | in gene              | 1      | 21.000  | 1      | 1    | 1_Testes_ARID4B: |
| 1_Testes_ARID4B:              | 1178                    | in gene              | 1      | 26.000  | 1      | 1    | 1_Testes_ARID4B: |
| 1_Testes_ARID4B:              | 389                     | in gene              | 1      | 24.000  | 1      | 1    | 1_Testes_ARID4B: |
| 1_Testes_ARID4B:              | 77                      | in gene              | 1      | 18.000  | 1      | 1    | 1_Testes_ARID4B: |
| 1_Testes_ARID4B:              | -229                    | upstream             | 1      | 31.000  | 1      | 1    | 1_Testes_ARID4B: |
| 1_Testes_ARID4B:              | -610                    | upstream             | 1      | 21.000  | 1      | 1    | 1_Testes_ARID4B: |
| 1_Testes_ARID4B:              | 544                     | in gene              | 1      | 21.000  | 1      | 1    | 1_Testes_ARID4B: |
| 1_Testes_ARID4B:              | 118                     | in gene              | 1      | 29.000  | 1      | 1    | 1_Testes_ARID4B: |
| 1_Testes_ARID4B: 56795, 59    |                         | downstream, in gene  | 1      | 29.500  | 2      | 1    | 1_Testes_ARID4B: |
| 1_Testes_ARID4B:              | 102                     | in gene              | 1      | 24.000  | 1      | 1    | 1_Testes_ARID4B: |
| 1_Testes_ARID4B: -240, 560    |                         | upstream, in gene    | 1      | 33.500  | 2      | 1    | 1_Testes_ARID4B: |
| 1_Testes_ARID4B:              | 75                      | in gene              | 1      | 30.000  | 1      | 1    | 1_Testes_ARID4B: |
| 1_Testes_ARID4B:              | 29                      | in gene              | 1      | 19.000  | 1      | 1    | 1_Testes_ARID4B: |
| 1_Testes_ARID4B: 40403, 41267 |                         | downstream, downstre | 1      | 33.500  | 2      | 1    | 1_Testes_ARID4B: |

|                                        |                      |   |        |   |                  |
|----------------------------------------|----------------------|---|--------|---|------------------|
| 1_Testes_ARID4B: 124, 988              | in gene, in gene     | 1 | 33.500 | 2 | 1_Testes_ARID4B: |
| 1_Testes_ARID4B: -8767, -10847         | upstream, upstream   | 1 | 31.000 | 2 | 1_Testes_ARID4B: |
| 1_Testes_ARID4B: 2413, 333             | in gene, in gene     | 1 | 31.000 | 2 | 1_Testes_ARID4B: |
| 1_Testes_ARID4B: 127215, 125135, -8529 | downstream, downstre | 1 | 28.333 | 3 | 1_Testes_ARID4B: |
| 1_Testes_ARID4B:                       | 225 in gene          | 1 | 23.000 | 1 | 1_Testes_ARID4B: |
| 1_Testes_ARID4B:                       | 18213 downstream     | 1 | 23.000 | 1 | 1_Testes_ARID4B: |
| 1_Testes_ARID4B:                       | 23 in gene           | 1 | 26.000 | 1 | 1_Testes_ARID4B: |
| 1_Testes_ARID4B:                       | 299 in gene          | 1 | 29.000 | 1 | 1_Testes_ARID4B: |
| 1_Testes_ARID4B:                       | -105 upstream        | 1 | 29.000 | 1 | 1_Testes_ARID4B: |
| 1_Testes_ARID4B:                       | 36 in gene           | 1 | 29.000 | 1 | 1_Testes_ARID4B: |
| 1_Testes_ARID4B:                       | 106051 downstream    | 1 | 29.000 | 1 | 1_Testes_ARID4B: |
| 1_Testes_ARID4B:                       | -968 upstream        | 1 | 25.000 | 1 | 1_Testes_ARID4B: |
| 1_Testes_ARID4B:                       | 166 in gene          | 1 | 25.000 | 1 | 1_Testes_ARID4B: |
| 1_Testes_ARID4B:                       | 510 in gene          | 1 | 21.000 | 1 | 1_Testes_ARID4B: |
| 1_Testes_ARID4B:                       | 37947 in gene        | 1 | 24.000 | 1 | 1_Testes_ARID4B: |
| 1_Testes_ARID4B:                       | 106 in gene          | 1 | 19.000 | 1 | 1_Testes_ARID4B: |
| 1_Testes_ARID4B:                       | 173728 downstream    | 1 | 35.000 | 1 | 1_Testes_ARID4B: |
| 1_Testes_ARID4B:                       | 149 in gene          | 1 | 35.000 | 1 | 1_Testes_ARID4B: |
| 1_Testes_ARID4B: 110747, 491           | downstream, in gene  | 1 | 31.000 | 2 | 1_Testes_ARID4B: |
| 1_Testes_ARID4B:                       | 623 in gene          | 1 | 21.000 | 1 | 1_Testes_ARID4B: |
| 1_Testes_ARID4B:                       | 191 in gene          | 1 | 27.000 | 1 | 1_Testes_ARID4B: |
| 1_Testes_ARID4B:                       | 217 in gene          | 1 | 21.000 | 1 | 1_Testes_ARID4B: |
| 1_Testes_ARID4B:                       | 377 in gene          | 1 | 29.000 | 1 | 1_Testes_ARID4B: |
| 1_Testes_ARID4B:                       | -12 upstream         | 1 | 25.000 | 1 | 1_Testes_ARID4B: |
| 1_Testes_ARID4B:                       | 16373 downstream     | 1 | 25.000 | 1 | 1_Testes_ARID4B: |
| 1_Testes_ARID4B:                       | 28080 downstream     | 1 | 23.000 | 1 | 1_Testes_ARID4B: |
| 1_Testes_ARID4B:                       | 304 in gene          | 1 | 23.000 | 1 | 1_Testes_ARID4B: |
| 1_Testes_ARID4B:                       | 150 in gene          | 1 | 27.000 | 1 | 1_Testes_ARID4B: |
| 1_Testes_ARID4B:                       | 758 in gene          | 1 | 24.000 | 1 | 1_Testes_ARID4B: |
| 1_Testes_ARID4B:                       | 79 in gene           | 1 | 31.000 | 1 | 1_Testes_ARID4B: |
| 1_Testes_ARID4B:                       | 223 in gene          | 1 | 30.000 | 1 | 1_Testes_ARID4B: |
| 1_Testes_ARID4B:                       | 371 in gene          | 1 | 23.000 | 1 | 1_Testes_ARID4B: |
| 1_Testes_ARID4B:                       | 262 in gene          | 1 | 32.000 | 1 | 1_Testes_ARID4B: |
| 1_Testes_ARID4B:                       | 147 in gene          | 1 | 24.000 | 1 | 1_Testes_ARID4B: |
| 1_Testes_ARID4B:                       | 252 in gene          | 1 | 51.000 | 1 | 1_Testes_ARID4B: |
| 1_Testes_ARID4B:                       | -468 upstream        | 1 | 51.000 | 1 | 1_Testes_ARID4B: |
| 1_Testes_ARID4B:                       | 403 in gene          | 1 | 32.000 | 1 | 1_Testes_ARID4B: |
| 1_Testes_ARID4B:                       | 11046 downstream     | 1 | 45.000 | 1 | 1_Testes_ARID4B: |
| 1_Testes_ARID4B:                       | 167 in gene          | 1 | 45.000 | 1 | 1_Testes_ARID4B: |
| 1_Testes_ARID4B:                       | 91 in gene           | 1 | 25.000 | 1 | 1_Testes_ARID4B: |
| 1_Testes_ARID4B:                       | -1514 upstream       | 1 | 28.000 | 1 | 1_Testes_ARID4B: |
| 1_Testes_ARID4B:                       | 1379 in gene         | 1 | 28.000 | 1 | 1_Testes_ARID4B: |
| 1_Testes_ARID4B:                       | -440 upstream        | 1 | 31.000 | 1 | 1_Testes_ARID4B: |
| 1_Testes_ARID4B:                       | 364 in gene          | 1 | 31.000 | 1 | 1_Testes_ARID4B: |
| 1_Testes_ARID4B: 28690, 18             | downstream, in gene  | 1 | 27.500 | 2 | 1_Testes_ARID4B: |
| 1_Testes_ARID4B:                       | 108 in gene          | 1 | 24.000 | 1 | 1_Testes_ARID4B: |
| 1_Testes_ARID4B:                       | -77 upstream         | 1 | 30.000 | 1 | 1_Testes_ARID4B: |



|                              |                     |   |        |   |                  |
|------------------------------|---------------------|---|--------|---|------------------|
| 1_Testes_ARID4B:             | 36 in gene          | 1 | 19.000 | 1 | 1_Testes_ARID4B: |
| 1_Testes_ARID4B:             | 10777 in gene       | 1 | 36.000 | 1 | 1_Testes_ARID4B: |
| 1_Testes_ARID4B:             | -3874 upstream      | 1 | 25.000 | 1 | 1_Testes_ARID4B: |
| 1_Testes_ARID4B:             | -272 upstream       | 1 | 25.000 | 1 | 1_Testes_ARID4B: |
| 1_Testes_ARID4B:             | 472 in gene         | 1 | 36.000 | 1 | 1_Testes_ARID4B: |
| 1_Testes_ARID4B:             | 21870 downstream    | 1 | 36.000 | 1 | 1_Testes_ARID4B: |
| 1_Testes_ARID4B:             | 151 in gene         | 1 | 27.000 | 1 | 1_Testes_ARID4B: |
| 1_Testes_ARID4B:             | -380 upstream       | 1 | 27.000 | 1 | 1_Testes_ARID4B: |
| 1_Testes_ARID4B:             | -1710 upstream      | 1 | 22.000 | 1 | 1_Testes_ARID4B: |
| 1_Testes_ARID4B:             | -406 upstream       | 1 | 26.000 | 1 | 1_Testes_ARID4B: |
| 1_Testes_ARID4B:             | 317 in gene         | 1 | 26.000 | 1 | 1_Testes_ARID4B: |
| 1_Testes_ARID4B:             | 239 in gene         | 1 | 25.000 | 1 | 1_Testes_ARID4B: |
| 1_Testes_ARID4B:             | 349 in gene         | 1 | 31.000 | 1 | 1_Testes_ARID4B: |
| 1_Testes_ARID4B:             | -30 upstream        | 1 | 22.000 | 1 | 1_Testes_ARID4B: |
| 1_Testes_ARID4B:             | 146 in gene         | 1 | 26.000 | 1 | 1_Testes_ARID4B: |
| 1_Testes_ARID4B:             | -6806 upstream      | 1 | 26.000 | 1 | 1_Testes_ARID4B: |
| 1_Testes_ARID4B:             | -1533 upstream      | 1 | 32.000 | 1 | 1_Testes_ARID4B: |
| 1_Testes_ARID4B:             | 626 in gene         | 1 | 31.000 | 1 | 1_Testes_ARID4B: |
| 1_Testes_ARID4B:             | 397 in gene         | 1 | 23.000 | 1 | 1_Testes_ARID4B: |
| 1_Testes_ARID4B:             | 360 in gene         | 1 | 24.000 | 1 | 1_Testes_ARID4B: |
| 1_Testes_ARID4B: -245, 3531  | upstream, in gene   | 1 | 20.500 | 2 | 1_Testes_ARID4B: |
| 1_Testes_ARID4B:             | -298 upstream       | 1 | 20.000 | 1 | 1_Testes_ARID4B: |
| 1_Testes_ARID4B:             | 289 in gene         | 1 | 20.000 | 1 | 1_Testes_ARID4B: |
| 1_Testes_ARID4B:             | -1903 upstream      | 1 | 20.000 | 1 | 1_Testes_ARID4B: |
| 1_Testes_ARID4B:             | 37089 downstream    | 1 | 20.000 | 1 | 1_Testes_ARID4B: |
| 1_Testes_ARID4B:             | -149 upstream       | 1 | 20.000 | 1 | 1_Testes_ARID4B: |
| 1_Testes_ARID4B:             | -627 upstream       | 1 | 34.000 | 1 | 1_Testes_ARID4B: |
| 1_Testes_ARID4B:             | -388 upstream       | 1 | 20.000 | 1 | 1_Testes_ARID4B: |
| 1_Testes_ARID4B:             | -240 upstream       | 1 | 27.000 | 1 | 1_Testes_ARID4B: |
| 1_Testes_ARID4B:             | -797 upstream       | 1 | 25.000 | 1 | 1_Testes_ARID4B: |
| 1_Testes_ARID4B: 111, 45983  | in gene, downstream | 1 | 27.500 | 2 | 1_Testes_ARID4B: |
| 1_Testes_ARID4B:             | 422 in gene         | 1 | 30.000 | 1 | 1_Testes_ARID4B: |
| 1_Testes_ARID4B: 7759, -417  | in gene, upstream   | 1 | 20.500 | 2 | 1_Testes_ARID4B: |
| 1_Testes_ARID4B: -7965, 211  | upstream, in gene   | 1 | 20.500 | 2 | 1_Testes_ARID4B: |
| 1_Testes_ARID4B:             | 284 in gene         | 1 | 44.000 | 1 | 1_Testes_ARID4B: |
| 1_Testes_ARID4B:             | 252 in gene         | 1 | 25.000 | 1 | 1_Testes_ARID4B: |
| 1_Testes_ARID4B:             | 83 in gene          | 1 | 22.000 | 1 | 1_Testes_ARID4B: |
| 1_Testes_ARID4B:             | -247 upstream       | 1 | 22.000 | 1 | 1_Testes_ARID4B: |
| 1_Testes_ARID4B:             | 340 in gene         | 1 | 17.000 | 1 | 1_Testes_ARID4B: |
| 1_Testes_ARID4B:             | 192 in gene         | 1 | 20.000 | 1 | 1_Testes_ARID4B: |
| 1_Testes_ARID4B:             | 945 in gene         | 1 | 19.000 | 1 | 1_Testes_ARID4B: |
| 1_Testes_ARID4B: 25791, -545 | in gene, upstream   | 1 | 18.500 | 2 | 1_Testes_ARID4B: |
| 1_Testes_ARID4B:             | -549 upstream       | 1 | 17.000 | 1 | 1_Testes_ARID4B: |
| 1_Testes_ARID4B:             | 346 in gene         | 1 | 23.000 | 1 | 1_Testes_ARID4B: |
| 1_Testes_ARID4B:             | 18902 in gene       | 1 | 27.000 | 1 | 1_Testes_ARID4B: |
| 1_Testes_ARID4B:             | 400 in gene         | 1 | 27.000 | 1 | 1_Testes_ARID4B: |
| 1_Testes_ARID4B:             | 8344 downstream     | 1 | 27.000 | 1 | 1_Testes_ARID4B: |

|                                         |                          |          |                    |
|-----------------------------------------|--------------------------|----------|--------------------|
| 1_Testes_ARID4B: 9501, 17277            | in gene, downstream      | 1 22.000 | 2 1_Testes_ARID4B: |
| 1_Testes_ARID4B: -6905, 871             | upstream, in gene        | 1 22.000 | 2 1_Testes_ARID4B: |
| 1_Testes_ARID4B: -9606, -1830           | upstream, upstream       | 1 22.000 | 2 1_Testes_ARID4B: |
| 1_Testes_ARID4B: 37822                  | in gene                  | 1 30.000 | 1 1_Testes_ARID4B: |
| 1_Testes_ARID4B: 404                    | in gene                  | 1 30.000 | 1 1_Testes_ARID4B: |
| 1_Testes_ARID4B: 12759                  | downstream               | 1 20.000 | 1 1_Testes_ARID4B: |
| 1_Testes_ARID4B: 277                    | in gene                  | 1 20.000 | 1 1_Testes_ARID4B: |
| 1_Testes_ARID4B: -335                   | upstream                 | 1 20.000 | 1 1_Testes_ARID4B: |
| 1_Testes_ARID4B: 79                     | in gene                  | 1 22.000 | 1 1_Testes_ARID4B: |
| 1_Testes_ARID4B: 707                    | in gene                  | 1 18.000 | 1 1_Testes_ARID4B: |
| 1_Testes_ARID4B: -7710                  | upstream                 | 1 27.000 | 1 1_Testes_ARID4B: |
| 1_Testes_ARID4B: 768                    | in gene                  | 1 27.000 | 1 1_Testes_ARID4B: |
| 1_Testes_ARID4B: -1186                  | upstream                 | 1 27.000 | 1 1_Testes_ARID4B: |
| 1_Testes_ARID4B: 11418                  | downstream               | 1 30.000 | 1 1_Testes_ARID4B: |
| 1_Testes_ARID4B: 219                    | in gene                  | 1 30.000 | 1 1_Testes_ARID4B: |
| 1_Testes_ARID4B: 11859                  | downstream               | 1 30.000 | 1 1_Testes_ARID4B: |
| 1_Testes_ARID4B: -262                   | upstream                 | 1 32.000 | 1 1_Testes_ARID4B: |
| 1_Testes_ARID4B: 211                    | in gene                  | 1 32.000 | 1 1_Testes_ARID4B: |
| 1_Testes_ARID4B: 8213                   | downstream               | 1 32.000 | 1 1_Testes_ARID4B: |
| 1_Testes_ARID4B: 21053, -4707           | downstream, upstream     | 1 25.000 | 2 1_Testes_ARID4B: |
| 1_Testes_ARID4B: 377                    | in gene                  | 1 18.000 | 1 1_Testes_ARID4B: |
| 1_Testes_ARID4B: 27408                  | downstream               | 1 18.000 | 1 1_Testes_ARID4B: |
| 1_Testes_ARID4B: 392                    | in gene                  | 1 21.000 | 1 1_Testes_ARID4B: |
| 1_Testes_ARID4B: 14279, -6777           | downstream, upstream     | 1 21.000 | 2 1_Testes_ARID4B: |
| 1_Testes_ARID4B: 6495                   | in gene                  | 1 21.000 | 1 1_Testes_ARID4B: |
| 1_Testes_ARID4B: 25586, 27122, 28578    | downstream, downstre     | 1 28.000 | 3 1_Testes_ARID4B: |
| 1_Testes_ARID4B: 3375, 1839, 383        | in gene, in gene, in gen | 1 28.000 | 3 1_Testes_ARID4B: |
| 1_Testes_ARID4B: -3436, -1900, -444     | upstream, upstream, u    | 1 28.000 | 3 1_Testes_ARID4B: |
| 1_Testes_ARID4B: 30356, 28820, 27364, 2 | downstream, downstre     | 1 30.333 | 6 1_Testes_ARID4B: |
| 1_Testes_ARID4B: -3269, -1573, 603      | upstream, upstream, in   | 1 32.667 | 3 1_Testes_ARID4B: |
| 1_Testes_ARID4B: 25127                  | downstream               | 1 18.000 | 1 1_Testes_ARID4B: |
| 1_Testes_ARID4B: 390                    | in gene                  | 1 18.000 | 1 1_Testes_ARID4B: |
| 1_Testes_ARID4B: 1373                   | in gene                  | 1 19.000 | 1 1_Testes_ARID4B: |
| 1_Testes_ARID4B: 191                    | in gene                  | 1 32.000 | 1 1_Testes_ARID4B: |
| 1_Testes_ARID4B: 191                    | in gene                  | 1 32.000 | 1 1_Testes_ARID4B: |
| 1_Testes_ARID4B: 4                      | in gene                  | 1 18.000 | 1 1_Testes_ARID4B: |
| 1_Testes_ARID4B: 233                    | in gene                  | 1 31.000 | 1 1_Testes_ARID4B: |
| 1_Testes_ARID4B: -1181                  | upstream                 | 1 31.000 | 1 1_Testes_ARID4B: |
| 1_Testes_ARID4B: 190                    | in gene                  | 1 22.000 | 1 1_Testes_ARID4B: |
| 1_Testes_ARID4B: 425                    | in gene                  | 1 20.000 | 1 1_Testes_ARID4B: |
| 1_Testes_ARID4B: 137                    | in gene                  | 1 20.000 | 1 1_Testes_ARID4B: |
| 1_Testes_ARID4B: 335                    | in gene                  | 1 25.000 | 1 1_Testes_ARID4B: |
| 1_Testes_ARID4B: -5856                  | upstream                 | 1 25.000 | 1 1_Testes_ARID4B: |
| 1_Testes_ARID4B: 325                    | in gene                  | 1 32.000 | 1 1_Testes_ARID4B: |
| 1_Testes_ARID4B: -792                   | upstream                 | 1 37.000 | 1 1_Testes_ARID4B: |
| 1_Testes_ARID4B: 255                    | in gene                  | 1 37.000 | 1 1_Testes_ARID4B: |
| 1_Testes_ARID4B: 25                     | in gene                  | 1 19.000 | 1 1_Testes_ARID4B: |

|                               |                      |          |                    |
|-------------------------------|----------------------|----------|--------------------|
| 1_Testes_ARID4B: 548, 18873   | in gene, downstream  | 1 25.000 | 2 1_Testes_ARID4B: |
| 1_Testes_ARID4B:              | 117 in gene          | 1 29.000 | 1 1_Testes_ARID4B: |
| 1_Testes_ARID4B:              | 639 in gene          | 1 48.000 | 1 1_Testes_ARID4B: |
| 1_Testes_ARID4B:              | -7531 upstream       | 1 48.000 | 1 1_Testes_ARID4B: |
| 1_Testes_ARID4B:              | -2489 upstream       | 1 48.000 | 1 1_Testes_ARID4B: |
| 1_Testes_ARID4B:              | -758 upstream        | 1 48.000 | 1 1_Testes_ARID4B: |
| 1_Testes_ARID4B:              | 336 in gene          | 1 39.000 | 1 1_Testes_ARID4B: |
| 1_Testes_ARID4B:              | 77 in gene           | 1 23.000 | 1 1_Testes_ARID4B: |
| 1_Testes_ARID4B:              | 457 in gene          | 1 19.000 | 1 1_Testes_ARID4B: |
| 1_Testes_ARID4B:              | 10 in gene           | 1 24.000 | 1 1_Testes_ARID4B: |
| 1_Testes_ARID4B:              | 149 in gene          | 1 28.000 | 1 1_Testes_ARID4B: |
| 1_Testes_ARID4B:              | 167 in gene          | 1 15.000 | 1 1_Testes_ARID4B: |
| 1_Testes_ARID4B:              | 831 in gene          | 1 22.000 | 1 1_Testes_ARID4B: |
| 1_Testes_ARID4B:              | 194 in gene          | 1 28.000 | 1 1_Testes_ARID4B: |
| 1_Testes_ARID4B: 869, 126565  | in gene, in gene     | 1 30.500 | 2 1_Testes_ARID4B: |
| 1_Testes_ARID4B:              | 40 in gene           | 1 18.000 | 1 1_Testes_ARID4B: |
| 1_Testes_ARID4B:              | -97 upstream         | 1 26.000 | 1 1_Testes_ARID4B: |
| 1_Testes_ARID4B:              | -71 upstream         | 1 22.000 | 1 1_Testes_ARID4B: |
| 1_Testes_ARID4B:              | 17 in gene           | 1 33.000 | 1 1_Testes_ARID4B: |
| 1_Testes_ARID4B:              | 23237 in gene        | 1 21.000 | 1 1_Testes_ARID4B: |
| 1_Testes_ARID4B: -5761, 15327 | upstream, downstream | 1 21.000 | 2 1_Testes_ARID4B: |
| 1_Testes_ARID4B:              | -30 upstream         | 1 21.000 | 1 1_Testes_ARID4B: |
| 1_Testes_ARID4B: 32383, 255   | downstream, in gene  | 1 25.000 | 2 1_Testes_ARID4B: |
| 1_Testes_ARID4B: 7501, -6707  | downstream, upstream | 1 27.500 | 2 1_Testes_ARID4B: |
| 1_Testes_ARID4B:              | 486 in gene          | 1 26.000 | 1 1_Testes_ARID4B: |
| 1_Testes_ARID4B: 46592, 160   | downstream, in gene  | 1 35.000 | 2 1_Testes_ARID4B: |
| 1_Testes_ARID4B:              | 196 in gene          | 1 27.000 | 1 1_Testes_ARID4B: |
| 1_Testes_ARID4B:              | 507 in gene          | 1 27.000 | 1 1_Testes_ARID4B: |
| 1_Testes_ARID4B:              | 142 in gene          | 1 29.000 | 1 1_Testes_ARID4B: |
| 1_Testes_ARID4B:              | 7003 downstream      | 1 29.000 | 1 1_Testes_ARID4B: |
| 1_Testes_ARID4B:              | 209 in gene          | 1 24.000 | 1 1_Testes_ARID4B: |
| 1_Testes_ARID4B:              | 7065 downstream      | 1 24.000 | 1 1_Testes_ARID4B: |
| 1_Testes_ARID4B:              | 506 in gene          | 1 24.000 | 1 1_Testes_ARID4B: |
| 1_Testes_ARID4B: -4294, -8454 | upstream, upstream   | 1 26.000 | 2 1_Testes_ARID4B: |
| 1_Testes_ARID4B: 211, 4371    | in gene, downstream  | 1 26.000 | 2 1_Testes_ARID4B: |
| 1_Testes_ARID4B: -3625, 535   | upstream, in gene    | 1 26.000 | 2 1_Testes_ARID4B: |
| 1_Testes_ARID4B: 7899, 67467  | in gene, downstream  | 1 30.000 | 2 1_Testes_ARID4B: |
| 1_Testes_ARID4B:              | 295 in gene          | 1 42.000 | 1 1_Testes_ARID4B: |
| 1_Testes_ARID4B:              | -380 upstream        | 1 40.000 | 1 1_Testes_ARID4B: |
| 1_Testes_ARID4B:              | -477 upstream        | 1 40.000 | 1 1_Testes_ARID4B: |
| 1_Testes_ARID4B: 33592, -440  | in gene, upstream    | 1 26.500 | 2 1_Testes_ARID4B: |
| 1_Testes_ARID4B:              | 255 in gene          | 1 28.000 | 1 1_Testes_ARID4B: |
| 1_Testes_ARID4B:              | 591 in gene          | 1 24.000 | 1 1_Testes_ARID4B: |
| 1_Testes_ARID4B:              | 162 in gene          | 1 32.000 | 1 1_Testes_ARID4B: |
| 1_Testes_ARID4B:              | 342 in gene          | 1 32.000 | 1 1_Testes_ARID4B: |
| 1_Testes_ARID4B:              | -537 upstream        | 1 32.000 | 1 1_Testes_ARID4B: |
| 1_Testes_ARID4B: 206, -1810   | in gene, upstream    | 1 29.500 | 2 1_Testes_ARID4B: |

|                                  |                          |          |                    |
|----------------------------------|--------------------------|----------|--------------------|
| 1_Testes_ARID4B: -2237, -221     | upstream, upstream       | 1 29.500 | 2 1_Testes_ARID4B: |
| 1_Testes_ARID4B:                 | 100 in gene              | 1 29.000 | 1 1_Testes_ARID4B: |
| 1_Testes_ARID4B:                 | 354 in gene              | 1 29.000 | 1 1_Testes_ARID4B: |
| 1_Testes_ARID4B:                 | -596 upstream            | 1 24.000 | 1 1_Testes_ARID4B: |
| 1_Testes_ARID4B:                 | 411 in gene              | 1 24.000 | 1 1_Testes_ARID4B: |
| 1_Testes_ARID4B:                 | -1148 upstream           | 1 44.000 | 1 1_Testes_ARID4B: |
| 1_Testes_ARID4B:                 | 1018 in gene             | 1 44.000 | 1 1_Testes_ARID4B: |
| 1_Testes_ARID4B: -412, -1148     | upstream, upstream       | 1 31.500 | 2 1_Testes_ARID4B: |
| 1_Testes_ARID4B: 67, 803         | in gene, in gene         | 1 31.500 | 2 1_Testes_ARID4B: |
| 1_Testes_ARID4B:                 | 277 in gene              | 1 28.000 | 1 1_Testes_ARID4B: |
| 1_Testes_ARID4B:                 | 246 in gene              | 1 22.000 | 1 1_Testes_ARID4B: |
| 1_Testes_ARID4B:                 | -68 upstream             | 1 21.000 | 1 1_Testes_ARID4B: |
| 1_Testes_ARID4B: 215955, 83      | in gene, in gene         | 1 24.500 | 2 1_Testes_ARID4B: |
| 1_Testes_ARID4B: 4648, 1640, 712 | in gene, in gene, in gen | 1 32.333 | 3 1_Testes_ARID4B: |
| 1_Testes_ARID4B:                 | 302 in gene              | 1 24.000 | 1 1_Testes_ARID4B: |
| 1_Testes_ARID4B:                 | 214 in gene              | 1 38.000 | 1 1_Testes_ARID4B: |
| 1_Testes_ARID4B:                 | 307 in gene              | 1 23.000 | 1 1_Testes_ARID4B: |
| 1_Testes_ARID4B:                 | 188378 downstream        | 1 23.000 | 1 1_Testes_ARID4B: |
| 1_Testes_ARID4B:                 | 220 in gene              | 1 31.000 | 1 1_Testes_ARID4B: |
| 1_Testes_ARID4B:                 | 383 in gene              | 1 20.000 | 1 1_Testes_ARID4B: |
| 1_Testes_ARID4B:                 | 40 in gene               | 1 25.000 | 1 1_Testes_ARID4B: |
| 1_Testes_ARID4B:                 | 481 in gene              | 1 16.000 | 1 1_Testes_ARID4B: |
| 1_Testes_ARID4B:                 | 918899 downstream        | 1 16.000 | 1 1_Testes_ARID4B: |
| 1_Testes_ARID4B:                 | 230 in gene              | 1 27.000 | 1 1_Testes_ARID4B: |
| 1_Testes_ARID4B:                 | -1112 upstream           | 1 24.000 | 1 1_Testes_ARID4B: |
| 1_Testes_ARID4B: 214, 141142     | in gene, downstream      | 1 27.500 | 2 1_Testes_ARID4B: |
| 1_Testes_ARID4B:                 | 267 in gene              | 1 31.000 | 1 1_Testes_ARID4B: |
| 1_Testes_ARID4B:                 | 136 in gene              | 1 26.000 | 1 1_Testes_ARID4B: |
| 1_Testes_ARID4B:                 | 57896 downstream         | 1 26.000 | 1 1_Testes_ARID4B: |
| 1_Testes_ARID4B:                 | 12101 in gene            | 1 27.000 | 1 1_Testes_ARID4B: |
| 1_Testes_ARID4B:                 | -175 upstream            | 1 27.000 | 1 1_Testes_ARID4B: |
| 1_Testes_ARID4B:                 | 343 in gene              | 1 29.000 | 1 1_Testes_ARID4B: |
| 1_Testes_ARID4B:                 | 26 in gene               | 1 32.000 | 1 1_Testes_ARID4B: |
| 1_Testes_ARID4B:                 | 474 in gene              | 1 31.000 | 1 1_Testes_ARID4B: |
| 1_Testes_ARID4B:                 | 34859 downstream         | 1 31.000 | 1 1_Testes_ARID4B: |
| 1_Testes_ARID4B: 865, -735       | in gene, upstream        | 1 31.000 | 2 1_Testes_ARID4B: |
| 1_Testes_ARID4B: -1493, 107      | upstream, in gene        | 1 31.000 | 2 1_Testes_ARID4B: |
| 1_Testes_ARID4B:                 | 262 in gene              | 1 28.000 | 1 1_Testes_ARID4B: |
| 1_Testes_ARID4B:                 | 203 in gene              | 1 40.000 | 1 1_Testes_ARID4B: |
| 1_Testes_ARID4B: 371, 17683      | in gene, downstream      | 1 23.000 | 2 1_Testes_ARID4B: |
| 1_Testes_ARID4B:                 | 184 in gene              | 1 27.000 | 1 1_Testes_ARID4B: |
| 1_Testes_ARID4B:                 | 30625 in gene            | 1 17.000 | 1 1_Testes_ARID4B: |
| 1_Testes_ARID4B:                 | 211 in gene              | 1 23.000 | 1 1_Testes_ARID4B: |
| 1_Testes_ARID4B:                 | 285 in gene              | 1 24.000 | 1 1_Testes_ARID4B: |
| 1_Testes_ARID4B:                 | 156 in gene              | 1 20.000 | 1 1_Testes_ARID4B: |
| 1_Testes_ARID4B:                 | 498 in gene              | 1 37.000 | 1 1_Testes_ARID4B: |
| 1_Testes_ARID4B:                 | 19665 downstream         | 1 18.000 | 1 1_Testes_ARID4B: |

|                             |                      |   |        |   |                  |
|-----------------------------|----------------------|---|--------|---|------------------|
| 1_Testes_ARID4B:            | 2276 in gene         | 1 | 18.000 | 1 | 1_Testes_ARID4B: |
| 1_Testes_ARID4B:            | 13070 downstream     | 1 | 25.000 | 1 | 1_Testes_ARID4B: |
| 1_Testes_ARID4B:            | 172 in gene          | 1 | 25.000 | 1 | 1_Testes_ARID4B: |
| 1_Testes_ARID4B:            | 820 in gene          | 1 | 30.000 | 1 | 1_Testes_ARID4B: |
| 1_Testes_ARID4B:            | 168 in gene          | 1 | 32.000 | 1 | 1_Testes_ARID4B: |
| 1_Testes_ARID4B:            | 51268 downstream     | 1 | 32.000 | 1 | 1_Testes_ARID4B: |
| 1_Testes_ARID4B:            | 243 in gene          | 1 | 23.000 | 1 | 1_Testes_ARID4B: |
| 1_Testes_ARID4B:            | 9850 downstream      | 1 | 26.000 | 1 | 1_Testes_ARID4B: |
| 1_Testes_ARID4B:            | 373 in gene          | 1 | 26.000 | 1 | 1_Testes_ARID4B: |
| 1_Testes_ARID4B: -67, 39186 | upstream, downstream | 1 | 25.000 | 2 | 1_Testes_ARID4B: |
| 1_Testes_ARID4B:            | 81 in gene           | 1 | 30.000 | 1 | 1_Testes_ARID4B: |
| 1_Testes_ARID4B:            | -9618 upstream       | 1 | 20.000 | 1 | 1_Testes_ARID4B: |
| 1_Testes_ARID4B: -3538, 78  | upstream, in gene    | 1 | 32.500 | 2 | 1_Testes_ARID4B: |
| 1_Testes_ARID4B:            | -6684 upstream       | 1 | 24.000 | 1 | 1_Testes_ARID4B: |
| 1_Testes_ARID4B:            | 47 in gene           | 1 | 24.000 | 1 | 1_Testes_ARID4B: |
| 1_Testes_ARID4B:            | 117660 in gene       | 1 | 22.000 | 1 | 1_Testes_ARID4B: |
| 1_Testes_ARID4B:            | 14635 downstream     | 1 | 34.000 | 1 | 1_Testes_ARID4B: |
| 1_Testes_ARID4B:            | 526 in gene          | 1 | 34.000 | 1 | 1_Testes_ARID4B: |
| 1_Testes_ARID4B:            | 180 in gene          | 1 | 35.000 | 1 | 1_Testes_ARID4B: |
| 1_Testes_ARID4B:            | 50227 downstream     | 1 | 22.000 | 1 | 1_Testes_ARID4B: |
| 1_Testes_ARID4B:            | 23 in gene           | 1 | 22.000 | 1 | 1_Testes_ARID4B: |
| 1_Testes_ARID4B:            | 55451 downstream     | 1 | 22.000 | 1 | 1_Testes_ARID4B: |
| 1_Testes_ARID4B: 1883, 139  | in gene, in gene     | 1 | 30.500 | 2 | 1_Testes_ARID4B: |
| 1_Testes_ARID4B: -1301, 443 | upstream, in gene    | 1 | 30.500 | 2 | 1_Testes_ARID4B: |
| 1_Testes_ARID4B:            | 169 in gene          | 1 | 32.000 | 1 | 1_Testes_ARID4B: |
| 1_Testes_ARID4B:            | 400 in gene          | 1 | 31.000 | 1 | 1_Testes_ARID4B: |
| 1_Testes_ARID4B:            | -529 upstream        | 1 | 30.000 | 1 | 1_Testes_ARID4B: |
| 1_Testes_ARID4B:            | 311 in gene          | 1 | 30.000 | 1 | 1_Testes_ARID4B: |
| 1_Testes_ARID4B:            | 88 in gene           | 1 | 30.000 | 1 | 1_Testes_ARID4B: |
| 1_Testes_ARID4B:            | 159 in gene          | 1 | 24.000 | 1 | 1_Testes_ARID4B: |
| 1_Testes_ARID4B:            | 89 in gene           | 1 | 24.000 | 1 | 1_Testes_ARID4B: |
| 1_Testes_ARID4B:            | -1558 upstream       | 1 | 29.000 | 1 | 1_Testes_ARID4B: |
| 1_Testes_ARID4B:            | 7360 in gene         | 1 | 20.000 | 1 | 1_Testes_ARID4B: |
| 1_Testes_ARID4B:            | 176 in gene          | 1 | 29.000 | 1 | 1_Testes_ARID4B: |
| 1_Testes_ARID4B: 9179, 5979 | in gene, in gene     | 1 | 17.500 | 2 | 1_Testes_ARID4B: |
| 1_Testes_ARID4B:            | 15254 downstream     | 1 | 16.000 | 1 | 1_Testes_ARID4B: |
| 1_Testes_ARID4B: 353, 32625 | in gene, downstream  | 1 | 27.000 | 2 | 1_Testes_ARID4B: |
| 1_Testes_ARID4B:            | 235 in gene          | 1 | 29.000 | 1 | 1_Testes_ARID4B: |
| 1_Testes_ARID4B:            | 220 in gene          | 1 | 22.000 | 1 | 1_Testes_ARID4B: |
| 1_Testes_ARID4B:            | 347 in gene          | 1 | 19.000 | 1 | 1_Testes_ARID4B: |
| 1_Testes_ARID4B:            | 123 in gene          | 1 | 21.000 | 1 | 1_Testes_ARID4B: |
| 1_Testes_ARID4B:            | 78 in gene           | 1 | 36.000 | 1 | 1_Testes_ARID4B: |
| 1_Testes_ARID4B:            | 147 in gene          | 1 | 27.000 | 1 | 1_Testes_ARID4B: |
| 1_Testes_ARID4B:            | 146 in gene          | 1 | 33.000 | 1 | 1_Testes_ARID4B: |
| 1_Testes_ARID4B:            | 80 in gene           | 1 | 19.000 | 1 | 1_Testes_ARID4B: |
| 1_Testes_ARID4B:            | 218 in gene          | 1 | 25.000 | 1 | 1_Testes_ARID4B: |
| 1_Testes_ARID4B:            | 197 in gene          | 1 | 23.000 | 1 | 1_Testes_ARID4B: |

|                              |                     |   |        |   |                  |
|------------------------------|---------------------|---|--------|---|------------------|
| 1_Testes_ARID4B:             | 16169 downstream    | 1 | 31.000 | 1 | 1_Testes_ARID4B: |
| 1_Testes_ARID4B:             | 178 in gene         | 1 | 31.000 | 1 | 1_Testes_ARID4B: |
| 1_Testes_ARID4B: 214, -394   | in gene, upstream   | 1 | 21.000 | 2 | 1_Testes_ARID4B: |
| 1_Testes_ARID4B:             | 546 in gene         | 1 | 26.000 | 1 | 1_Testes_ARID4B: |
| 1_Testes_ARID4B:             | 119 in gene         | 1 | 20.000 | 1 | 1_Testes_ARID4B: |
| 1_Testes_ARID4B:             | 396 in gene         | 1 | 35.000 | 1 | 1_Testes_ARID4B: |
| 1_Testes_ARID4B:             | 8418 downstream     | 1 | 40.000 | 1 | 1_Testes_ARID4B: |
| 1_Testes_ARID4B:             | 119 in gene         | 1 | 40.000 | 1 | 1_Testes_ARID4B: |
| 1_Testes_ARID4B:             | 3805 in gene        | 1 | 20.000 | 1 | 1_Testes_ARID4B: |
| 1_Testes_ARID4B:             | 308 in gene         | 1 | 33.000 | 1 | 1_Testes_ARID4B: |
| 1_Testes_ARID4B:             | -1920 upstream      | 1 | 26.000 | 1 | 1_Testes_ARID4B: |
| 1_Testes_ARID4B:             | 452 in gene         | 1 | 29.000 | 1 | 1_Testes_ARID4B: |
| 1_Testes_ARID4B:             | -1109 upstream      | 1 | 20.000 | 1 | 1_Testes_ARID4B: |
| 1_Testes_ARID4B:             | 259 in gene         | 1 | 23.000 | 1 | 1_Testes_ARID4B: |
| 1_Testes_ARID4B:             | 199 in gene         | 1 | 23.000 | 1 | 1_Testes_ARID4B: |
| 1_Testes_ARID4B:             | 149 in gene         | 1 | 23.000 | 1 | 1_Testes_ARID4B: |
| 1_Testes_ARID4B:             | 667 in gene         | 1 | 23.000 | 1 | 1_Testes_ARID4B: |
| 1_Testes_ARID4B: 157, 637    | in gene, in gene    | 1 | 19.500 | 2 | 1_Testes_ARID4B: |
| 1_Testes_ARID4B:             | 350 in gene         | 1 | 28.000 | 1 | 1_Testes_ARID4B: |
| 1_Testes_ARID4B:             | 147 in gene         | 1 | 23.000 | 1 | 1_Testes_ARID4B: |
| 1_Testes_ARID4B:             | 96 in gene          | 1 | 23.000 | 1 | 1_Testes_ARID4B: |
| 1_Testes_ARID4B:             | 284 in gene         | 1 | 25.000 | 1 | 1_Testes_ARID4B: |
| 1_Testes_ARID4B: 580330, 394 | downstream, in gene | 1 | 23.500 | 2 | 1_Testes_ARID4B: |
| 1_Testes_ARID4B:             | 213 in gene         | 1 | 31.000 | 1 | 1_Testes_ARID4B: |
| 1_Testes_ARID4B:             | -1229 upstream      | 1 | 30.000 | 1 | 1_Testes_ARID4B: |
| 1_Testes_ARID4B:             | 322 in gene         | 1 | 30.000 | 1 | 1_Testes_ARID4B: |
| 1_Testes_ARID4B:             | -1865 upstream      | 1 | 30.000 | 1 | 1_Testes_ARID4B: |
| 1_Testes_ARID4B:             | -2604 upstream      | 1 | 30.000 | 1 | 1_Testes_ARID4B: |
| 1_Testes_ARID4B:             | 35144 downstream    | 1 | 30.000 | 1 | 1_Testes_ARID4B: |
| 1_Testes_ARID4B:             | -108 upstream       | 1 | 19.000 | 1 | 1_Testes_ARID4B: |
| 1_Testes_ARID4B:             | 268 in gene         | 1 | 26.000 | 1 | 1_Testes_ARID4B: |
| 1_Testes_ARID4B:             | 176 in gene         | 1 | 26.000 | 1 | 1_Testes_ARID4B: |
| 1_Testes_ARID4B:             | 257 in gene         | 1 | 39.000 | 1 | 1_Testes_ARID4B: |
| 1_Testes_ARID4B:             | 515 in gene         | 1 | 25.000 | 1 | 1_Testes_ARID4B: |
| 1_Testes_ARID4B:             | 222 in gene         | 1 | 33.000 | 1 | 1_Testes_ARID4B: |
| 1_Testes_ARID4B: 77, -7955   | in gene, upstream   | 1 | 25.000 | 2 | 1_Testes_ARID4B: |
| 1_Testes_ARID4B: 65598, 222  | downstream, in gene | 1 | 24.000 | 2 | 1_Testes_ARID4B: |
| 1_Testes_ARID4B: 922, -566   | in gene, upstream   | 1 | 33.000 | 2 | 1_Testes_ARID4B: |
| 1_Testes_ARID4B:             | -156 upstream       | 1 | 23.000 | 1 | 1_Testes_ARID4B: |
| 1_Testes_ARID4B:             | 679 in gene         | 1 | 26.000 | 1 | 1_Testes_ARID4B: |
| 1_Testes_ARID4B:             | -222 upstream       | 1 | 36.000 | 1 | 1_Testes_ARID4B: |
| 1_Testes_ARID4B:             | -206 upstream       | 1 | 22.000 | 1 | 1_Testes_ARID4B: |
| 1_Testes_ARID4B:             | 409 in gene         | 1 | 24.000 | 1 | 1_Testes_ARID4B: |
| 1_Testes_ARID4B:             | -5 upstream         | 1 | 25.000 | 1 | 1_Testes_ARID4B: |
| 1_Testes_ARID4B: 17764, 356  | downstream, in gene | 1 | 27.500 | 2 | 1_Testes_ARID4B: |
| 1_Testes_ARID4B:             | -6430 upstream      | 1 | 24.000 | 1 | 1_Testes_ARID4B: |
| 1_Testes_ARID4B:             | 345 in gene         | 1 | 24.000 | 1 | 1_Testes_ARID4B: |

|                                   |                        |   |        |   |                  |
|-----------------------------------|------------------------|---|--------|---|------------------|
| 1_Testes_ARID4B:                  | 7366 downstream        | 1 | 24.000 | 1 | 1_Testes_ARID4B: |
| 1_Testes_ARID4B:                  | 16583 downstream       | 1 | 23.000 | 1 | 1_Testes_ARID4B: |
| 1_Testes_ARID4B:                  | -83 upstream           | 1 | 23.000 | 1 | 1_Testes_ARID4B: |
| 1_Testes_ARID4B:                  | 29 in gene             | 1 | 23.000 | 1 | 1_Testes_ARID4B: |
| 1_Testes_ARID4B:                  | 22784 downstream       | 1 | 34.000 | 1 | 1_Testes_ARID4B: |
| 1_Testes_ARID4B:                  | 63 in gene             | 1 | 34.000 | 1 | 1_Testes_ARID4B: |
| 1_Testes_ARID4B:                  | -7289 upstream         | 1 | 34.000 | 1 | 1_Testes_ARID4B: |
| 1_Testes_ARID4B:                  | 650 in gene            | 1 | 20.000 | 1 | 1_Testes_ARID4B: |
| 1_Testes_ARID4B:                  | 260 in gene            | 1 | 24.000 | 1 | 1_Testes_ARID4B: |
| 1_Testes_ARID4B:                  | -67 upstream           | 1 | 27.000 | 1 | 1_Testes_ARID4B: |
| 1_Testes_ARID4B:                  | 287 in gene            | 1 | 27.000 | 1 | 1_Testes_ARID4B: |
| 1_Testes_ARID4B:                  | 241 in gene            | 1 | 39.000 | 1 | 1_Testes_ARID4B: |
| 1_Testes_ARID4B: 169, 13705       | in gene, downstream    | 1 | 24.500 | 2 | 1_Testes_ARID4B: |
| 1_Testes_ARID4B: 16687, 3151      | downstream, in gene    | 1 | 24.500 | 2 | 1_Testes_ARID4B: |
| 1_Testes_ARID4B:                  | 35686 downstream       | 1 | 30.000 | 1 | 1_Testes_ARID4B: |
| 1_Testes_ARID4B:                  | 365 in gene            | 1 | 30.000 | 1 | 1_Testes_ARID4B: |
| 1_Testes_ARID4B:                  | 18043 downstream       | 1 | 20.000 | 1 | 1_Testes_ARID4B: |
| 1_Testes_ARID4B:                  | 10 in gene             | 1 | 20.000 | 1 | 1_Testes_ARID4B: |
| 1_Testes_ARID4B:                  | 7230 in gene           | 1 | 22.000 | 1 | 1_Testes_ARID4B: |
| 1_Testes_ARID4B:                  | 222 in gene            | 1 | 25.000 | 1 | 1_Testes_ARID4B: |
| 1_Testes_ARID4B:                  | 401 in gene            | 1 | 23.000 | 1 | 1_Testes_ARID4B: |
| 1_Testes_ARID4B:                  | 262 in gene            | 1 | 27.000 | 1 | 1_Testes_ARID4B: |
| 1_Testes_ARID4B:                  | -3975 upstream         | 1 | 27.000 | 1 | 1_Testes_ARID4B: |
| 1_Testes_ARID4B:                  | -6265 upstream         | 1 | 27.000 | 1 | 1_Testes_ARID4B: |
| 1_Testes_ARID4B:                  | 182 in gene            | 1 | 23.000 | 1 | 1_Testes_ARID4B: |
| 1_Testes_ARID4B:                  | -10289 upstream        | 1 | 20.000 | 1 | 1_Testes_ARID4B: |
| 1_Testes_ARID4B:                  | 349 in gene            | 1 | 29.000 | 1 | 1_Testes_ARID4B: |
| 1_Testes_ARID4B:                  | -3325 upstream         | 1 | 28.000 | 1 | 1_Testes_ARID4B: |
| 1_Testes_ARID4B:                  | -369 upstream          | 1 | 28.000 | 1 | 1_Testes_ARID4B: |
| 1_Testes_ARID4B: 19000, 632       | downstream, in gene    | 1 | 38.000 | 2 | 1_Testes_ARID4B: |
| 1_Testes_ARID4B:                  | 359 in gene            | 1 | 32.000 | 1 | 1_Testes_ARID4B: |
| 1_Testes_ARID4B: -229, 1403       | upstream, in gene      | 1 | 18.000 | 2 | 1_Testes_ARID4B: |
| 1_Testes_ARID4B:                  | -421 upstream          | 1 | 32.000 | 1 | 1_Testes_ARID4B: |
| 1_Testes_ARID4B:                  | 159 in gene            | 1 | 32.000 | 1 | 1_Testes_ARID4B: |
| 1_Testes_ARID4B:                  | 121 in gene            | 1 | 28.000 | 1 | 1_Testes_ARID4B: |
| 1_Testes_ARID4B:                  | 495 in gene            | 1 | 30.000 | 1 | 1_Testes_ARID4B: |
| 1_Testes_ARID4B:                  | 236 in gene            | 1 | 28.000 | 1 | 1_Testes_ARID4B: |
| 1_Testes_ARID4B: 372, 2132        | in gene, in gene       | 1 | 26.000 | 2 | 1_Testes_ARID4B: |
| 1_Testes_ARID4B:                  | 304 in gene            | 1 | 20.000 | 1 | 1_Testes_ARID4B: |
| 1_Testes_ARID4B:                  | 81 in gene             | 1 | 28.000 | 1 | 1_Testes_ARID4B: |
| 1_Testes_ARID4B: -470, 106, 55338 | upstream, in gene, dow | 1 | 22.000 | 3 | 1_Testes_ARID4B: |
| 1_Testes_ARID4B:                  | 362 in gene            | 1 | 20.000 | 1 | 1_Testes_ARID4B: |
| 1_Testes_ARID4B:                  | 37 in gene             | 1 | 27.000 | 1 | 1_Testes_ARID4B: |
| 1_Testes_ARID4B:                  | -605 upstream          | 1 | 32.000 | 1 | 1_Testes_ARID4B: |
| 1_Testes_ARID4B:                  | -5448 upstream         | 1 | 32.000 | 1 | 1_Testes_ARID4B: |
| 1_Testes_ARID4B:                  | 11329 downstream       | 1 | 21.000 | 1 | 1_Testes_ARID4B: |
| 1_Testes_ARID4B:                  | 174 in gene            | 1 | 21.000 | 1 | 1_Testes_ARID4B: |

|                               |                      |   |        |   |                  |
|-------------------------------|----------------------|---|--------|---|------------------|
| 1_Testes_ARID4B:              | 7393 downstream      | 1 | 22.000 | 1 | 1_Testes_ARID4B: |
| 1_Testes_ARID4B:              | -86 upstream         | 1 | 22.000 | 1 | 1_Testes_ARID4B: |
| 1_Testes_ARID4B: 778, -118    | in gene, upstream    | 1 | 27.000 | 2 | 1_Testes_ARID4B: |
| 1_Testes_ARID4B:              | 145 in gene          | 1 | 24.000 | 1 | 1_Testes_ARID4B: |
| 1_Testes_ARID4B:              | 10933 downstream     | 1 | 24.000 | 1 | 1_Testes_ARID4B: |
| 1_Testes_ARID4B:              | 95 in gene           | 1 | 28.000 | 1 | 1_Testes_ARID4B: |
| 1_Testes_ARID4B:              | 97 in gene           | 1 | 25.000 | 1 | 1_Testes_ARID4B: |
| 1_Testes_ARID4B:              | 267 in gene          | 1 | 20.000 | 1 | 1_Testes_ARID4B: |
| 1_Testes_ARID4B:              | 416 in gene          | 1 | 31.000 | 1 | 1_Testes_ARID4B: |
| 1_Testes_ARID4B:              | -468 upstream        | 1 | 31.000 | 1 | 1_Testes_ARID4B: |
| 1_Testes_ARID4B: 24285, 349   | in gene, in gene     | 1 | 26.500 | 2 | 1_Testes_ARID4B: |
| 1_Testes_ARID4B:              | 409 in gene          | 1 | 30.000 | 1 | 1_Testes_ARID4B: |
| 1_Testes_ARID4B: -3167, 31041 | upstream, downstream | 1 | 31.000 | 2 | 1_Testes_ARID4B: |
| 1_Testes_ARID4B:              | 105 in gene          | 1 | 32.000 | 1 | 1_Testes_ARID4B: |
| 1_Testes_ARID4B:              | 627 in gene          | 1 | 23.000 | 1 | 1_Testes_ARID4B: |
| 1_Testes_ARID4B:              | 384 in gene          | 1 | 30.000 | 1 | 1_Testes_ARID4B: |
| 1_Testes_ARID4B:              | 384 in gene          | 1 | 20.000 | 1 | 1_Testes_ARID4B: |
| 1_Testes_ARID4B:              | 371 in gene          | 1 | 20.000 | 1 | 1_Testes_ARID4B: |
| 1_Testes_ARID4B:              | -58 upstream         | 1 | 22.000 | 1 | 1_Testes_ARID4B: |
| 1_Testes_ARID4B:              | 340 in gene          | 1 | 20.000 | 1 | 1_Testes_ARID4B: |
| 1_Testes_ARID4B:              | 176 in gene          | 1 | 31.000 | 1 | 1_Testes_ARID4B: |
| 1_Testes_ARID4B: 120, -2280   | in gene, upstream    | 1 | 19.000 | 2 | 1_Testes_ARID4B: |
| 1_Testes_ARID4B:              | 106 in gene          | 1 | 21.000 | 1 | 1_Testes_ARID4B: |
| 1_Testes_ARID4B:              | 704 in gene          | 1 | 23.000 | 1 | 1_Testes_ARID4B: |
| 1_Testes_ARID4B:              | -366 upstream        | 1 | 19.000 | 1 | 1_Testes_ARID4B: |
| 1_Testes_ARID4B:              | 230 in gene          | 1 | 21.000 | 1 | 1_Testes_ARID4B: |
| 1_Testes_ARID4B: -8229, -9434 | upstream, upstream   | 1 | 17.500 | 2 | 1_Testes_ARID4B: |
| 1_Testes_ARID4B: 382, 1587    | in gene, in gene     | 1 | 17.500 | 2 | 1_Testes_ARID4B: |
| 1_Testes_ARID4B:              | 753 in gene          | 1 | 28.000 | 1 | 1_Testes_ARID4B: |
| 1_Testes_ARID4B:              | 6984 downstream      | 1 | 28.000 | 1 | 1_Testes_ARID4B: |
| 1_Testes_ARID4B:              | 190 in gene          | 1 | 36.000 | 1 | 1_Testes_ARID4B: |
| 1_Testes_ARID4B:              | -390 upstream        | 1 | 36.000 | 1 | 1_Testes_ARID4B: |
| 1_Testes_ARID4B:              | 1080 in gene         | 1 | 22.000 | 1 | 1_Testes_ARID4B: |
| 1_Testes_ARID4B:              | 276 in gene          | 1 | 42.000 | 1 | 1_Testes_ARID4B: |
| 1_Testes_ARID4B:              | 359 in gene          | 1 | 48.000 | 1 | 1_Testes_ARID4B: |
| 1_Testes_ARID4B:              | 387 in gene          | 1 | 48.000 | 1 | 1_Testes_ARID4B: |
| 1_Testes_ARID4B: 811, -661    | in gene, upstream    | 1 | 23.500 | 2 | 1_Testes_ARID4B: |
| 1_Testes_ARID4B: 78, 1550     | in gene, in gene     | 1 | 23.500 | 2 | 1_Testes_ARID4B: |
| 1_Testes_ARID4B:              | 339 in gene          | 1 | 23.000 | 1 | 1_Testes_ARID4B: |
| 1_Testes_ARID4B:              | 621 in gene          | 1 | 24.000 | 1 | 1_Testes_ARID4B: |
| 1_Testes_ARID4B:              | -7113 upstream       | 1 | 24.000 | 1 | 1_Testes_ARID4B: |
| 1_Testes_ARID4B: 21160, 701   | downstream, in gene  | 1 | 25.500 | 2 | 1_Testes_ARID4B: |
| 1_Testes_ARID4B:              | 3016 in gene         | 1 | 27.000 | 1 | 1_Testes_ARID4B: |
| 1_Testes_ARID4B:              | 363 in gene          | 1 | 20.000 | 1 | 1_Testes_ARID4B: |
| 1_Testes_ARID4B:              | 233223 downstream    | 1 | 26.000 | 1 | 1_Testes_ARID4B: |
| 1_Testes_ARID4B:              | 525 in gene          | 1 | 26.000 | 1 | 1_Testes_ARID4B: |
| 1_Testes_ARID4B:              | 199 in gene          | 1 | 24.000 | 1 | 1_Testes_ARID4B: |



|                                 |                      |   |        |   |                  |
|---------------------------------|----------------------|---|--------|---|------------------|
| 1_Testes_ARID4B:                | 700 in gene          | 1 | 24.000 | 1 | 1_Testes_ARID4B: |
| 1_Testes_ARID4B:                | -416 upstream        | 1 | 21.000 | 1 | 1_Testes_ARID4B: |
| 1_Testes_ARID4B:                | 163 in gene          | 1 | 21.000 | 1 | 1_Testes_ARID4B: |
| 1_Testes_ARID4B:                | 153 in gene          | 1 | 62.000 | 1 | 1_Testes_ARID4B: |
| 1_Testes_ARID4B: 18631, 407     | downstream, in gene  | 1 | 41.000 | 2 | 1_Testes_ARID4B: |
| 1_Testes_ARID4B:                | 98864 downstream     | 1 | 20.000 | 1 | 1_Testes_ARID4B: |
| 1_Testes_ARID4B:                | 301 in gene          | 1 | 26.000 | 1 | 1_Testes_ARID4B: |
| 1_Testes_ARID4B:                | 88 in gene           | 1 | 32.000 | 1 | 1_Testes_ARID4B: |
| 1_Testes_ARID4B:                | 672 in gene          | 1 | 32.000 | 1 | 1_Testes_ARID4B: |
| 1_Testes_ARID4B:                | -459 upstream        | 1 | 32.000 | 1 | 1_Testes_ARID4B: |
| 1_Testes_ARID4B: -4592, 13592   | upstream, downstream | 1 | 27.500 | 2 | 1_Testes_ARID4B: |
| 1_Testes_ARID4B:                | 62 in gene           | 1 | 23.000 | 1 | 1_Testes_ARID4B: |
| 1_Testes_ARID4B:                | -113 upstream        | 1 | 23.000 | 1 | 1_Testes_ARID4B: |
| 1_Testes_ARID4B:                | -89 upstream         | 1 | 20.000 | 1 | 1_Testes_ARID4B: |
| 1_Testes_ARID4B:                | 98 in gene           | 1 | 20.000 | 1 | 1_Testes_ARID4B: |
| 1_Testes_ARID4B:                | -277 upstream        | 1 | 30.000 | 1 | 1_Testes_ARID4B: |
| 1_Testes_ARID4B:                | 105 in gene          | 1 | 25.000 | 1 | 1_Testes_ARID4B: |
| 1_Testes_ARID4B:                | -10 upstream         | 1 | 28.000 | 1 | 1_Testes_ARID4B: |
| 1_Testes_ARID4B:                | 1486 in gene         | 1 | 28.000 | 1 | 1_Testes_ARID4B: |
| 1_Testes_ARID4B:                | 320 in gene          | 1 | 19.000 | 1 | 1_Testes_ARID4B: |
| 1_Testes_ARID4B:                | -402 upstream        | 1 | 28.000 | 1 | 1_Testes_ARID4B: |
| 1_Testes_ARID4B:                | -7721 upstream       | 1 | 26.000 | 1 | 1_Testes_ARID4B: |
| 1_Testes_ARID4B:                | 188 in gene          | 1 | 22.000 | 1 | 1_Testes_ARID4B: |
| 1_Testes_ARID4B:                | 113 in gene          | 1 | 34.000 | 1 | 1_Testes_ARID4B: |
| 1_Testes_ARID4B:                | 572 in gene          | 1 | 17.000 | 1 | 1_Testes_ARID4B: |
| 1_Testes_ARID4B: -139, 16661    | upstream, in gene    | 1 | 24.500 | 2 | 1_Testes_ARID4B: |
| 1_Testes_ARID4B: -721, 16079    | upstream, in gene    | 1 | 24.500 | 2 | 1_Testes_ARID4B: |
| 1_Testes_ARID4B:                | 129 in gene          | 1 | 24.000 | 1 | 1_Testes_ARID4B: |
| 1_Testes_ARID4B:                | -249 upstream        | 1 | 24.000 | 1 | 1_Testes_ARID4B: |
| 1_Testes_ARID4B:                | 12854 downstream     | 1 | 24.000 | 1 | 1_Testes_ARID4B: |
| 1_Testes_ARID4B:                | 196 in gene          | 1 | 33.000 | 1 | 1_Testes_ARID4B: |
| 1_Testes_ARID4B:                | 260 in gene          | 1 | 25.000 | 1 | 1_Testes_ARID4B: |
| 1_Testes_ARID4B:                | -372 upstream        | 1 | 22.000 | 1 | 1_Testes_ARID4B: |
| 1_Testes_ARID4B:                | -73 upstream         | 1 | 25.000 | 1 | 1_Testes_ARID4B: |
| 1_Testes_ARID4B:                | 229 in gene          | 1 | 20.000 | 1 | 1_Testes_ARID4B: |
| 1_Testes_ARID4B: 110920, 112024 | in gene, in gene     | 1 | 23.500 | 2 | 1_Testes_ARID4B: |
| 1_Testes_ARID4B:                | -345 upstream        | 1 | 28.000 | 1 | 1_Testes_ARID4B: |
| 1_Testes_ARID4B:                | 3707 in gene         | 1 | 20.000 | 1 | 1_Testes_ARID4B: |
| 1_Testes_ARID4B:                | 672 in gene          | 1 | 20.000 | 1 | 1_Testes_ARID4B: |
| 1_Testes_ARID4B:                | 201 in gene          | 1 | 38.000 | 1 | 1_Testes_ARID4B: |
| 1_Testes_ARID4B:                | -1557 upstream       | 1 | 38.000 | 1 | 1_Testes_ARID4B: |
| 1_Testes_ARID4B:                | -1187 upstream       | 1 | 38.000 | 1 | 1_Testes_ARID4B: |
| 1_Testes_ARID4B:                | -9978 upstream       | 1 | 38.000 | 1 | 1_Testes_ARID4B: |
| 1_Testes_ARID4B:                | 219 in gene          | 1 | 22.000 | 1 | 1_Testes_ARID4B: |
| 1_Testes_ARID4B:                | 1006 in gene         | 1 | 29.000 | 1 | 1_Testes_ARID4B: |
| 1_Testes_ARID4B:                | 714 in gene          | 1 | 24.000 | 1 | 1_Testes_ARID4B: |
| 1_Testes_ARID4B:                | 1393 in gene         | 1 | 18.000 | 1 | 1_Testes_ARID4B: |

|                  |                                          |   |        |   |                  |
|------------------|------------------------------------------|---|--------|---|------------------|
| 1_Testes_ARID4B: | 540 in gene                              | 1 | 21.000 | 1 | 1_Testes_ARID4B: |
| 1_Testes_ARID4B: | 2820 in gene                             | 1 | 18.000 | 1 | 1_Testes_ARID4B: |
| 1_Testes_ARID4B: | 92 in gene                               | 1 | 33.000 | 1 | 1_Testes_ARID4B: |
| 1_Testes_ARID4B: | 333 in gene                              | 1 | 20.000 | 1 | 1_Testes_ARID4B: |
| 1_Testes_ARID4B: | 6218 downstream                          | 1 | 20.000 | 1 | 1_Testes_ARID4B: |
| 1_Testes_ARID4B: | 17950 downstream                         | 1 | 20.000 | 1 | 1_Testes_ARID4B: |
| 1_Testes_ARID4B: | -273 upstream                            | 1 | 22.000 | 1 | 1_Testes_ARID4B: |
| 1_Testes_ARID4B: | -31 upstream                             | 1 | 18.000 | 1 | 1_Testes_ARID4B: |
| 1_Testes_ARID4B: | 48 in gene                               | 1 | 25.000 | 1 | 1_Testes_ARID4B: |
| 1_Testes_ARID4B: | 479 in gene                              | 1 | 27.000 | 1 | 1_Testes_ARID4B: |
| 1_Testes_ARID4B: | 226 in gene                              | 1 | 32.000 | 1 | 1_Testes_ARID4B: |
| 1_Testes_ARID4B: | 1550 in gene                             | 1 | 21.000 | 1 | 1_Testes_ARID4B: |
| 1_Testes_ARID4B: | -2028 upstream                           | 1 | 21.000 | 1 | 1_Testes_ARID4B: |
| 1_Testes_ARID4B: | 105 in gene                              | 1 | 26.000 | 1 | 1_Testes_ARID4B: |
| 1_Testes_ARID4B: | -377 upstream                            | 1 | 35.000 | 1 | 1_Testes_ARID4B: |
| 1_Testes_ARID4B: | 224 in gene                              | 1 | 35.000 | 1 | 1_Testes_ARID4B: |
| 1_Testes_ARID4B: | 1164 in gene                             | 1 | 30.000 | 1 | 1_Testes_ARID4B: |
| 1_Testes_ARID4B: | 548 in gene                              | 1 | 33.000 | 1 | 1_Testes_ARID4B: |
| 1_Testes_ARID4B: | -50 upstream                             | 1 | 26.000 | 1 | 1_Testes_ARID4B: |
| 1_Testes_ARID4B: | -889 upstream                            | 1 | 23.000 | 1 | 1_Testes_ARID4B: |
| 1_Testes_ARID4B: | 498 in gene                              | 1 | 23.000 | 1 | 1_Testes_ARID4B: |
| 1_Testes_ARID4B: | 233 in gene                              | 1 | 25.000 | 1 | 1_Testes_ARID4B: |
| 1_Testes_ARID4B: | 13862 downstream                         | 1 | 26.000 | 1 | 1_Testes_ARID4B: |
| 1_Testes_ARID4B: | 164 in gene                              | 1 | 26.000 | 1 | 1_Testes_ARID4B: |
| 1_Testes_ARID4B: | -263, 29113 upstream, downstream         | 1 | 28.500 | 2 | 1_Testes_ARID4B: |
| 1_Testes_ARID4B: | 52 in gene                               | 1 | 31.000 | 1 | 1_Testes_ARID4B: |
| 1_Testes_ARID4B: | 77010 in gene                            | 1 | 22.000 | 1 | 1_Testes_ARID4B: |
| 1_Testes_ARID4B: | 1622 in gene                             | 1 | 43.000 | 1 | 1_Testes_ARID4B: |
| 1_Testes_ARID4B: | 261 in gene                              | 1 | 24.000 | 1 | 1_Testes_ARID4B: |
| 1_Testes_ARID4B: | 410 in gene                              | 1 | 22.000 | 1 | 1_Testes_ARID4B: |
| 1_Testes_ARID4B: | 124 in gene                              | 1 | 24.000 | 1 | 1_Testes_ARID4B: |
| 1_Testes_ARID4B: | 296 in gene                              | 1 | 35.000 | 1 | 1_Testes_ARID4B: |
| 1_Testes_ARID4B: | 152882, 1138 in gene, in gene            | 1 | 19.000 | 2 | 1_Testes_ARID4B: |
| 1_Testes_ARID4B: | -1312 upstream                           | 1 | 19.000 | 1 | 1_Testes_ARID4B: |
| 1_Testes_ARID4B: | -388, 860, 31228 upstream, in gene, in g | 1 | 17.333 | 3 | 1_Testes_ARID4B: |
| 1_Testes_ARID4B: | 127 in gene                              | 1 | 19.000 | 1 | 1_Testes_ARID4B: |
| 1_Testes_ARID4B: | -56 upstream                             | 1 | 23.000 | 1 | 1_Testes_ARID4B: |
| 1_Testes_ARID4B: | -15 upstream                             | 1 | 23.000 | 1 | 1_Testes_ARID4B: |
| 1_Testes_ARID4B: | 178 in gene                              | 1 | 18.000 | 1 | 1_Testes_ARID4B: |
| 1_Testes_ARID4B: | 107 in gene                              | 1 | 21.000 | 1 | 1_Testes_ARID4B: |
| 1_Testes_ARID4B: | 461 in gene                              | 1 | 19.000 | 1 | 1_Testes_ARID4B: |
| 1_Testes_ARID4B: | 236 in gene                              | 1 | 22.000 | 1 | 1_Testes_ARID4B: |
| 1_Testes_ARID4B: | -9720 upstream                           | 1 | 22.000 | 1 | 1_Testes_ARID4B: |
| 1_Testes_ARID4B: | 373 in gene                              | 1 | 29.000 | 1 | 1_Testes_ARID4B: |
| 1_Testes_ARID4B: | 363 in gene                              | 1 | 16.000 | 1 | 1_Testes_ARID4B: |
| 1_Testes_ARID4B: | 33191 in gene                            | 1 | 26.000 | 1 | 1_Testes_ARID4B: |
| 1_Testes_ARID4B: | 287 in gene                              | 1 | 26.000 | 1 | 1_Testes_ARID4B: |

|                              |                      |   |        |   |                  |
|------------------------------|----------------------|---|--------|---|------------------|
| 1_Testes_ARID4B:             | -210 upstream        | 1 | 26.000 | 1 | 1_Testes_ARID4B: |
| 1_Testes_ARID4B:             | 212 in gene          | 1 | 29.000 | 1 | 1_Testes_ARID4B: |
| 1_Testes_ARID4B:             | -338 upstream        | 1 | 29.000 | 1 | 1_Testes_ARID4B: |
| 1_Testes_ARID4B:             | 113233 in gene       | 1 | 38.000 | 1 | 1_Testes_ARID4B: |
| 1_Testes_ARID4B:             | 8539 in gene         | 1 | 38.000 | 1 | 1_Testes_ARID4B: |
| 1_Testes_ARID4B:             | 209 in gene          | 1 | 30.000 | 1 | 1_Testes_ARID4B: |
| 1_Testes_ARID4B:             | 188 in gene          | 1 | 41.000 | 1 | 1_Testes_ARID4B: |
| 1_Testes_ARID4B:             | -201 upstream        | 1 | 28.000 | 1 | 1_Testes_ARID4B: |
| 1_Testes_ARID4B:             | 126 in gene          | 1 | 28.000 | 1 | 1_Testes_ARID4B: |
| 1_Testes_ARID4B:             | 96 in gene           | 1 | 29.000 | 1 | 1_Testes_ARID4B: |
| 1_Testes_ARID4B:             | 20 in gene           | 1 | 22.000 | 1 | 1_Testes_ARID4B: |
| 1_Testes_ARID4B: 89, 15833   | in gene, in gene     | 1 | 24.000 | 2 | 1_Testes_ARID4B: |
| 1_Testes_ARID4B:             | 104043 downstream    | 1 | 34.000 | 1 | 1_Testes_ARID4B: |
| 1_Testes_ARID4B:             | 591 in gene          | 1 | 34.000 | 1 | 1_Testes_ARID4B: |
| 1_Testes_ARID4B:             | 348 in gene          | 1 | 22.000 | 1 | 1_Testes_ARID4B: |
| 1_Testes_ARID4B:             | 185 in gene          | 1 | 21.000 | 1 | 1_Testes_ARID4B: |
| 1_Testes_ARID4B:             | 9482 in gene         | 1 | 27.000 | 1 | 1_Testes_ARID4B: |
| 1_Testes_ARID4B:             | 589 in gene          | 1 | 21.000 | 1 | 1_Testes_ARID4B: |
| 1_Testes_ARID4B: 1361, 401   | in gene, in gene     | 1 | 21.500 | 2 | 1_Testes_ARID4B: |
| 1_Testes_ARID4B:             | 318 in gene          | 1 | 29.000 | 1 | 1_Testes_ARID4B: |
| 1_Testes_ARID4B:             | 419 in gene          | 1 | 22.000 | 1 | 1_Testes_ARID4B: |
| 1_Testes_ARID4B:             | 285 in gene          | 1 | 37.000 | 1 | 1_Testes_ARID4B: |
| 1_Testes_ARID4B: 147, 31603  | in gene, downstream  | 1 | 26.500 | 2 | 1_Testes_ARID4B: |
| 1_Testes_ARID4B: -97, 15839  | upstream, downstream | 1 | 29.500 | 2 | 1_Testes_ARID4B: |
| 1_Testes_ARID4B:             | 646 in gene          | 1 | 37.000 | 1 | 1_Testes_ARID4B: |
| 1_Testes_ARID4B:             | 600 in gene          | 1 | 28.000 | 1 | 1_Testes_ARID4B: |
| 1_Testes_ARID4B:             | 8527 downstream      | 1 | 28.000 | 1 | 1_Testes_ARID4B: |
| 1_Testes_ARID4B:             | 868 in gene          | 1 | 20.000 | 1 | 1_Testes_ARID4B: |
| 1_Testes_ARID4B:             | 498 in gene          | 1 | 18.000 | 1 | 1_Testes_ARID4B: |
| 1_Testes_ARID4B:             | 121 in gene          | 1 | 21.000 | 1 | 1_Testes_ARID4B: |
| 1_Testes_ARID4B: 23962, -54  | downstream, upstream | 1 | 23.500 | 2 | 1_Testes_ARID4B: |
| 1_Testes_ARID4B:             | 350 in gene          | 1 | 29.000 | 1 | 1_Testes_ARID4B: |
| 1_Testes_ARID4B:             | 75251 downstream     | 1 | 29.000 | 1 | 1_Testes_ARID4B: |
| 1_Testes_ARID4B: -137, 26503 | upstream, downstream | 1 | 19.000 | 2 | 1_Testes_ARID4B: |
| 1_Testes_ARID4B: 107, 33451  | in gene, downstream  | 1 | 24.500 | 2 | 1_Testes_ARID4B: |
| 1_Testes_ARID4B: 257, 43489  | in gene, downstream  | 1 | 26.000 | 2 | 1_Testes_ARID4B: |
| 1_Testes_ARID4B:             | 137 in gene          | 1 | 26.000 | 1 | 1_Testes_ARID4B: |
| 1_Testes_ARID4B:             | -800 upstream        | 1 | 26.000 | 1 | 1_Testes_ARID4B: |
| 1_Testes_ARID4B:             | 293 in gene          | 1 | 31.000 | 1 | 1_Testes_ARID4B: |
| 1_Testes_ARID4B:             | 363 in gene          | 1 | 31.000 | 1 | 1_Testes_ARID4B: |
| 1_Testes_ARID4B:             | -6772 upstream       | 1 | 31.000 | 1 | 1_Testes_ARID4B: |
| 1_Testes_ARID4B:             | -8168 upstream       | 1 | 26.000 | 1 | 1_Testes_ARID4B: |
| 1_Testes_ARID4B:             | -178 upstream        | 1 | 26.000 | 1 | 1_Testes_ARID4B: |
| 1_Testes_ARID4B: 300, -228   | in gene, upstream    | 1 | 29.500 | 2 | 1_Testes_ARID4B: |
| 1_Testes_ARID4B:             | -218 upstream        | 1 | 21.000 | 1 | 1_Testes_ARID4B: |
| 1_Testes_ARID4B:             | 353 in gene          | 1 | 21.000 | 1 | 1_Testes_ARID4B: |
| 1_Testes_ARID4B: 1203, 10419 | in gene, downstream  | 1 | 28.500 | 2 | 1_Testes_ARID4B: |

|                              |                      |          |                    |
|------------------------------|----------------------|----------|--------------------|
| 1_Testes_ARID4B: 9883, 667   | downstream, in gene  | 1 28.500 | 2 1_Testes_ARID4B: |
| 1_Testes_ARID4B:             | 342 in gene          | 1 21.000 | 1 1_Testes_ARID4B: |
| 1_Testes_ARID4B:             | 199 in gene          | 1 24.000 | 1 1_Testes_ARID4B: |
| 1_Testes_ARID4B:             | 4504 in gene         | 1 26.000 | 1 1_Testes_ARID4B: |
| 1_Testes_ARID4B:             | 196 in gene          | 1 26.000 | 1 1_Testes_ARID4B: |
| 1_Testes_ARID4B:             | 80 in gene           | 1 39.000 | 1 1_Testes_ARID4B: |
| 1_Testes_ARID4B:             | 829 in gene          | 1 20.000 | 1 1_Testes_ARID4B: |
| 1_Testes_ARID4B:             | 415 in gene          | 1 44.000 | 1 1_Testes_ARID4B: |
| 1_Testes_ARID4B:             | 530 in gene          | 1 19.000 | 1 1_Testes_ARID4B: |
| 1_Testes_ARID4B:             | 22936 downstream     | 1 19.000 | 1 1_Testes_ARID4B: |
| 1_Testes_ARID4B:             | 188 in gene          | 1 31.000 | 1 1_Testes_ARID4B: |
| 1_Testes_ARID4B:             | 238 in gene          | 1 24.000 | 1 1_Testes_ARID4B: |
| 1_Testes_ARID4B:             | 92 in gene           | 1 24.000 | 1 1_Testes_ARID4B: |
| 1_Testes_ARID4B:             | -3036 upstream       | 1 24.000 | 1 1_Testes_ARID4B: |
| 1_Testes_ARID4B:             | 24415 downstream     | 1 30.000 | 1 1_Testes_ARID4B: |
| 1_Testes_ARID4B:             | 608 in gene          | 1 30.000 | 1 1_Testes_ARID4B: |
| 1_Testes_ARID4B:             | 16529 in gene        | 1 16.000 | 1 1_Testes_ARID4B: |
| 1_Testes_ARID4B:             | 186 in gene          | 1 27.000 | 1 1_Testes_ARID4B: |
| 1_Testes_ARID4B:             | -906 upstream        | 1 27.000 | 1 1_Testes_ARID4B: |
| 1_Testes_ARID4B:             | 10 in gene           | 1 26.000 | 1 1_Testes_ARID4B: |
| 1_Testes_ARID4B:             | 28206 downstream     | 1 26.000 | 1 1_Testes_ARID4B: |
| 1_Testes_ARID4B: 159, -3857  | in gene, upstream    | 1 30.000 | 2 1_Testes_ARID4B: |
| 1_Testes_ARID4B: -3269, 747  | upstream, in gene    | 1 30.000 | 2 1_Testes_ARID4B: |
| 1_Testes_ARID4B: 8362, 4346  | downstream, downstre | 1 30.000 | 2 1_Testes_ARID4B: |
| 1_Testes_ARID4B:             | 459 in gene          | 1 22.000 | 1 1_Testes_ARID4B: |
| 1_Testes_ARID4B:             | 98080 downstream     | 1 22.000 | 1 1_Testes_ARID4B: |
| 1_Testes_ARID4B:             | 155 in gene          | 1 25.000 | 1 1_Testes_ARID4B: |
| 1_Testes_ARID4B:             | 834 in gene          | 1 18.000 | 1 1_Testes_ARID4B: |
| 1_Testes_ARID4B:             | -107 upstream        | 1 22.000 | 1 1_Testes_ARID4B: |
| 1_Testes_ARID4B:             | 24985 downstream     | 1 26.000 | 1 1_Testes_ARID4B: |
| 1_Testes_ARID4B: 518, 16422  | in gene, downstream  | 1 29.500 | 2 1_Testes_ARID4B: |
| 1_Testes_ARID4B:             | 335 in gene          | 1 33.000 | 1 1_Testes_ARID4B: |
| 1_Testes_ARID4B:             | -8944 upstream       | 1 22.000 | 1 1_Testes_ARID4B: |
| 1_Testes_ARID4B:             | 166 in gene          | 1 22.000 | 1 1_Testes_ARID4B: |
| 1_Testes_ARID4B: 30980, 100  | downstream, in gene  | 1 25.000 | 2 1_Testes_ARID4B: |
| 1_Testes_ARID4B:             | 27345 downstream     | 1 22.000 | 1 1_Testes_ARID4B: |
| 1_Testes_ARID4B:             | 264 in gene          | 1 22.000 | 1 1_Testes_ARID4B: |
| 1_Testes_ARID4B:             | 125 in gene          | 1 20.000 | 1 1_Testes_ARID4B: |
| 1_Testes_ARID4B: 59618, 450  | downstream, in gene  | 1 24.500 | 2 1_Testes_ARID4B: |
| 1_Testes_ARID4B:             | 154 in gene          | 1 20.000 | 1 1_Testes_ARID4B: |
| 1_Testes_ARID4B:             | 180 in gene          | 1 21.000 | 1 1_Testes_ARID4B: |
| 1_Testes_ARID4B:             | 451 in gene          | 1 25.000 | 1 1_Testes_ARID4B: |
| 1_Testes_ARID4B:             | -98 upstream         | 1 20.000 | 1 1_Testes_ARID4B: |
| 1_Testes_ARID4B:             | 7722 downstream      | 1 20.000 | 1 1_Testes_ARID4B: |
| 1_Testes_ARID4B: 5106, 10946 | downstream, downstre | 1 30.500 | 2 1_Testes_ARID4B: |
| 1_Testes_ARID4B: 270, 6110   | in gene, in gene     | 1 30.500 | 2 1_Testes_ARID4B: |
| 1_Testes_ARID4B:             | -6675 upstream       | 1 28.000 | 1 1_Testes_ARID4B: |

|                                           |        |                          |   |        |   |                  |
|-------------------------------------------|--------|--------------------------|---|--------|---|------------------|
| 1_Testes_ARID4B:                          | 23142  | downstream               | 1 | 24.000 | 1 | 1_Testes_ARID4B: |
| 1_Testes_ARID4B:                          | 6805   | in gene                  | 1 | 24.000 | 1 | 1_Testes_ARID4B: |
| 1_Testes_ARID4B:                          | 11569  | downstream               | 1 | 20.000 | 1 | 1_Testes_ARID4B: |
| 1_Testes_ARID4B:                          | 264    | in gene                  | 1 | 20.000 | 1 | 1_Testes_ARID4B: |
| 1_Testes_ARID4B:                          | -10586 | upstream                 | 1 | 20.000 | 1 | 1_Testes_ARID4B: |
| 1_Testes_ARID4B:                          | -4839  | upstream                 | 1 | 18.000 | 1 | 1_Testes_ARID4B: |
| 1_Testes_ARID4B:                          | 252    | in gene                  | 1 | 18.000 | 1 | 1_Testes_ARID4B: |
| 1_Testes_ARID4B:                          | -5733  | upstream                 | 1 | 28.000 | 1 | 1_Testes_ARID4B: |
| 1_Testes_ARID4B: 6099, 19774              |        | in gene, downstream      | 1 | 24.500 | 2 | 1_Testes_ARID4B: |
| 1_Testes_ARID4B: 13930, 255               |        | in gene, in gene         | 1 | 24.500 | 2 | 1_Testes_ARID4B: |
| 1_Testes_ARID4B:                          | -5288  | upstream                 | 1 | 21.000 | 1 | 1_Testes_ARID4B: |
| 1_Testes_ARID4B:                          | 8952   | downstream               | 1 | 17.000 | 1 | 1_Testes_ARID4B: |
| 1_Testes_ARID4B:                          | 4411   | downstream               | 1 | 17.000 | 1 | 1_Testes_ARID4B: |
| 1_Testes_ARID4B: 13674, -8182             |        | in gene, upstream        | 1 | 18.000 | 2 | 1_Testes_ARID4B: |
| 1_Testes_ARID4B: -190, -10494             |        | upstream, upstream       | 1 | 24.000 | 2 | 1_Testes_ARID4B: |
| 1_Testes_ARID4B: 149, 10453               |        | in gene, downstream      | 1 | 24.000 | 2 | 1_Testes_ARID4B: |
| 1_Testes_ARID4B: -9952, 352, 5888         |        | upstream, in gene, in g  | 1 | 22.667 | 3 | 1_Testes_ARID4B: |
| 1_Testes_ARID4B: 16952, 19165             |        | downstream, downstre     | 1 | 20.500 | 2 | 1_Testes_ARID4B: |
| 1_Testes_ARID4B: 6380, 8593               |        | in gene, downstream      | 1 | 20.500 | 2 | 1_Testes_ARID4B: |
| 1_Testes_ARID4B: 7226, 5013, -4534        |        | downstream, in gene, u   | 1 | 21.667 | 3 | 1_Testes_ARID4B: |
| 1_Testes_ARID4B: -9283, 264               |        | upstream, in gene        | 1 | 21.000 | 2 | 1_Testes_ARID4B: |
| 1_Testes_ARID4B:                          | -8751  | upstream                 | 1 | 24.000 | 1 | 1_Testes_ARID4B: |
| 1_Testes_ARID4B: 474, 4314                |        | in gene, downstream      | 1 | 24.500 | 2 | 1_Testes_ARID4B: |
| 1_Testes_ARID4B: 48718, 44878, 110        |        | downstream, in gene, i   | 1 | 27.000 | 3 | 1_Testes_ARID4B: |
| 1_Testes_ARID4B: -632, 15176, 22712       |        | upstream, downstream     | 1 | 34.000 | 3 | 1_Testes_ARID4B: |
| 1_Testes_ARID4B: 7655, 119, -3545, -4505  |        | in gene, in gene, upstre | 1 | 28.667 | 6 | 1_Testes_ARID4B: |
| 1_Testes_ARID4B: -10603, -3067, 597, 155  |        | upstream, upstream, in   | 1 | 28.000 | 7 | 1_Testes_ARID4B: |
| 1_Testes_ARID4B: -9042, -5378, -4418, -30 |        | upstream, upstream, u    | 1 | 28.429 | 7 | 1_Testes_ARID4B: |
| 1_Testes_ARID4B: -1, 4015                 |        | upstream, downstream     | 1 | 35.500 | 2 | 1_Testes_ARID4B: |
| 1_Testes_ARID4B: -5104, -1088             |        | upstream, upstream       | 1 | 35.500 | 2 | 1_Testes_ARID4B: |
| 1_Testes_ARID4B:                          | -7626  | upstream                 | 1 | 31.000 | 1 | 1_Testes_ARID4B: |
| 1_Testes_ARID4B:                          | 298    | in gene                  | 1 | 18.000 | 1 | 1_Testes_ARID4B: |
| 1_Testes_ARID4B:                          | 11316  | downstream               | 1 | 33.000 | 1 | 1_Testes_ARID4B: |
| 1_Testes_ARID4B:                          | 200    | in gene                  | 1 | 33.000 | 1 | 1_Testes_ARID4B: |
| 1_Testes_ARID4B: -4223, 27633             |        | upstream, downstream     | 1 | 44.000 | 2 | 1_Testes_ARID4B: |
| 1_Testes_ARID4B:                          | -9618  | upstream                 | 1 | 55.000 | 1 | 1_Testes_ARID4B: |
| 1_Testes_ARID4B:                          | 193    | in gene                  | 1 | 55.000 | 1 | 1_Testes_ARID4B: |
| 1_Testes_ARID4B: -9196, 13316, 19887, 2   |        | upstream, in gene, dow   | 1 | 29.000 | 4 | 1_Testes_ARID4B: |
| 1_Testes_ARID4B: 5412, -1159, -2732, -97  |        | downstream, upstream     | 1 | 21.000 | 4 | 1_Testes_ARID4B: |
| 1_Testes_ARID4B: 14337, 7766, 6193, -79   |        | downstream, in gene, i   | 1 | 21.000 | 4 | 1_Testes_ARID4B: |
| 1_Testes_ARID4B: -8438, -6865, 127, 1166  |        | upstream, upstream, in   | 1 | 21.750 | 4 | 1_Testes_ARID4B: |
| 1_Testes_ARID4B: 18174, 6638, -530        |        | downstream, in gene, u   | 1 | 21.000 | 3 | 1_Testes_ARID4B: |
| 1_Testes_ARID4B:                          | -7483  | upstream                 | 1 | 19.000 | 1 | 1_Testes_ARID4B: |
| 1_Testes_ARID4B: 6200, 643, -301          |        | in gene, in gene, upstre | 1 | 30.333 | 3 | 1_Testes_ARID4B: |
| 1_Testes_ARID4B: 12471, 11527             |        | downstream, downstre     | 1 | 36.500 | 2 | 1_Testes_ARID4B: |
| 1_Testes_ARID4B:                          | 213    | in gene                  | 1 | 25.000 | 1 | 1_Testes_ARID4B: |
| 1_Testes_ARID4B:                          | -7953  | upstream                 | 1 | 24.000 | 1 | 1_Testes_ARID4B: |

|                                         |                         |   |        |   |                  |
|-----------------------------------------|-------------------------|---|--------|---|------------------|
| 1_Testes_ARID4B: 14483, 168             | in gene, in gene        | 1 | 24.500 | 2 | 1_Testes_ARID4B: |
| 1_Testes_ARID4B: 15904, 384, -9264      | downstream, in gene, u  | 1 | 27.667 | 3 | 1_Testes_ARID4B: |
| 1_Testes_ARID4B: 13429, 3781, 357       | downstream, in gene, i  | 1 | 25.333 | 3 | 1_Testes_ARID4B: |
| 1_Testes_ARID4B: 160, 3872              | in gene, in gene        | 1 | 27.500 | 2 | 1_Testes_ARID4B: |
| 1_Testes_ARID4B: 158, 3870              | in gene, in gene        | 1 | 27.500 | 2 | 1_Testes_ARID4B: |
| 1_Testes_ARID4B:                        | 15548 in gene           | 1 | 18.000 | 1 | 1_Testes_ARID4B: |
| 1_Testes_ARID4B:                        | 18743 downstream        | 1 | 18.000 | 1 | 1_Testes_ARID4B: |
| 1_Testes_ARID4B:                        | 227 in gene             | 1 | 27.000 | 1 | 1_Testes_ARID4B: |
| 1_Testes_ARID4B: 218, 36714             | in gene, in gene        | 1 | 26.000 | 2 | 1_Testes_ARID4B: |
| 1_Testes_ARID4B: 6706, -8638            | downstream, upstream    | 1 | 31.500 | 2 | 1_Testes_ARID4B: |
| 1_Testes_ARID4B: -6815, 8529            | upstream, downstream    | 1 | 31.500 | 2 | 1_Testes_ARID4B: |
| 1_Testes_ARID4B:                        | 2016 in gene            | 1 | 39.000 | 1 | 1_Testes_ARID4B: |
| 1_Testes_ARID4B:                        | 6234 downstream         | 1 | 39.000 | 1 | 1_Testes_ARID4B: |
| 1_Testes_ARID4B:                        | 9312 downstream         | 1 | 22.000 | 1 | 1_Testes_ARID4B: |
| 1_Testes_ARID4B:                        | 7171 downstream         | 1 | 22.000 | 1 | 1_Testes_ARID4B: |
| 1_Testes_ARID4B:                        | 8071 in gene            | 1 | 22.000 | 1 | 1_Testes_ARID4B: |
| 1_Testes_ARID4B:                        | -183 upstream           | 1 | 31.000 | 1 | 1_Testes_ARID4B: |
| 1_Testes_ARID4B:                        | 117 in gene             | 1 | 31.000 | 1 | 1_Testes_ARID4B: |
| 1_Testes_ARID4B:                        | 18072 in gene           | 1 | 23.000 | 1 | 1_Testes_ARID4B: |
| 1_Testes_ARID4B:                        | 3081 downstream         | 1 | 23.000 | 1 | 1_Testes_ARID4B: |
| 1_Testes_ARID4B:                        | 20357 downstream        | 1 | 23.000 | 1 | 1_Testes_ARID4B: |
| 1_Testes_ARID4B: -1355, 341, 1845       | upstream, in gene, in g | 1 | 28.333 | 3 | 1_Testes_ARID4B: |
| 1_Testes_ARID4B:                        | -3272 upstream          | 1 | 24.000 | 1 | 1_Testes_ARID4B: |
| 1_Testes_ARID4B:                        | 22970 downstream        | 1 | 24.000 | 1 | 1_Testes_ARID4B: |
| 1_Testes_ARID4B:                        | -7304 upstream          | 1 | 38.000 | 1 | 1_Testes_ARID4B: |
| 1_Testes_ARID4B: 229, 23397             | in gene, downstream     | 1 | 29.500 | 2 | 1_Testes_ARID4B: |
| 1_Testes_ARID4B: -6927, 113, 1873, 8017 | upstream, in gene, in g | 1 | 23.000 | 4 | 1_Testes_ARID4B: |
| 1_Testes_ARID4B:                        | 23432 downstream        | 1 | 27.000 | 1 | 1_Testes_ARID4B: |
| 1_Testes_ARID4B:                        | 15849 downstream        | 1 | 26.000 | 1 | 1_Testes_ARID4B: |
| 1_Testes_ARID4B:                        | 9473 in gene            | 1 | 26.000 | 1 | 1_Testes_ARID4B: |
| 1_Testes_ARID4B:                        | -2211 upstream          | 1 | 26.000 | 1 | 1_Testes_ARID4B: |
| 1_Testes_ARID4B:                        | 9557 downstream         | 1 | 26.000 | 1 | 1_Testes_ARID4B: |
| 1_Testes_ARID4B:                        | -1853 upstream          | 1 | 33.000 | 1 | 1_Testes_ARID4B: |
| 1_Testes_ARID4B: 148, 29641             | in gene, downstream     | 1 | 27.500 | 2 | 1_Testes_ARID4B: |
| 1_Testes_ARID4B: 1510, 11366            | in gene, downstream     | 1 | 23.000 | 2 | 1_Testes_ARID4B: |
| 1_Testes_ARID4B: -6118, 3738            | upstream, in gene       | 1 | 23.000 | 2 | 1_Testes_ARID4B: |
| 1_Testes_ARID4B:                        | 10797 downstream        | 1 | 24.000 | 1 | 1_Testes_ARID4B: |
| 1_Testes_ARID4B:                        | -7303 upstream          | 1 | 27.000 | 1 | 1_Testes_ARID4B: |
| 1_Testes_ARID4B:                        | 190 in gene             | 1 | 27.000 | 1 | 1_Testes_ARID4B: |
| 1_Testes_ARID4B:                        | 8060 downstream         | 1 | 27.000 | 1 | 1_Testes_ARID4B: |
| 1_Testes_ARID4B:                        | 20610 downstream        | 1 | 27.000 | 1 | 1_Testes_ARID4B: |
| 1_Testes_ARID4B:                        | 6100 downstream         | 1 | 20.000 | 1 | 1_Testes_ARID4B: |
| 1_Testes_ARID4B:                        | -2536 upstream          | 1 | 20.000 | 1 | 1_Testes_ARID4B: |
| 1_Testes_ARID4B: 36645, 6693            | downstream, in gene     | 1 | 21.000 | 2 | 1_Testes_ARID4B: |
| 1_Testes_ARID4B:                        | 18325 in gene           | 1 | 20.000 | 1 | 1_Testes_ARID4B: |
| 1_Testes_ARID4B:                        | 246 in gene             | 1 | 32.000 | 1 | 1_Testes_ARID4B: |
| 1_Testes_ARID4B:                        | 5912 in gene            | 1 | 17.000 | 1 | 1_Testes_ARID4B: |

|                                |                      |   |        |   |                  |
|--------------------------------|----------------------|---|--------|---|------------------|
| 1_Testes_ARID4B:               | -9815 upstream       | 1 | 17.000 | 1 | 1_Testes_ARID4B: |
| 1_Testes_ARID4B:               | 15140 in gene        | 1 | 28.000 | 1 | 1_Testes_ARID4B: |
| 1_Testes_ARID4B:               | -5389 upstream       | 1 | 28.000 | 1 | 1_Testes_ARID4B: |
| 1_Testes_ARID4B:               | 179 in gene          | 1 | 21.000 | 1 | 1_Testes_ARID4B: |
| 1_Testes_ARID4B:               | -8806 upstream       | 1 | 36.000 | 1 | 1_Testes_ARID4B: |
| 1_Testes_ARID4B:               | 449 in gene          | 1 | 36.000 | 1 | 1_Testes_ARID4B: |
| 1_Testes_ARID4B:               | 103 in gene          | 1 | 27.000 | 1 | 1_Testes_ARID4B: |
| 1_Testes_ARID4B:               | 323 in gene          | 1 | 28.000 | 1 | 1_Testes_ARID4B: |
| 1_Testes_ARID4B:               | -9860 upstream       | 1 | 33.000 | 1 | 1_Testes_ARID4B: |
| 1_Testes_ARID4B:               | 59 in gene           | 1 | 33.000 | 1 | 1_Testes_ARID4B: |
| 1_Testes_ARID4B:               | -665 upstream        | 1 | 30.000 | 1 | 1_Testes_ARID4B: |
| 1_Testes_ARID4B:               | 448 in gene          | 1 | 28.000 | 1 | 1_Testes_ARID4B: |
| 1_Testes_ARID4B:               | 173 in gene          | 1 | 39.000 | 1 | 1_Testes_ARID4B: |
| 1_Testes_ARID4B:               | -481 upstream        | 1 | 33.000 | 1 | 1_Testes_ARID4B: |
| 1_Testes_ARID4B:               | 349 in gene          | 1 | 33.000 | 1 | 1_Testes_ARID4B: |
| 1_Testes_ARID4B:               | 222 in gene          | 1 | 39.000 | 1 | 1_Testes_ARID4B: |
| 1_Testes_ARID4B:               | 1106 in gene         | 1 | 25.000 | 1 | 1_Testes_ARID4B: |
| 1_Testes_ARID4B:               | 201 in gene          | 1 | 33.000 | 1 | 1_Testes_ARID4B: |
| 1_Testes_ARID4B:               | 305 in gene          | 1 | 26.000 | 1 | 1_Testes_ARID4B: |
| 1_Testes_ARID4B:               | 245 in gene          | 1 | 25.000 | 1 | 1_Testes_ARID4B: |
| 1_Testes_ARID4B: 29057, 289    | downstream, in gene  | 1 | 26.500 | 2 | 1_Testes_ARID4B: |
| 1_Testes_ARID4B: 54356, -10220 | downstream, upstream | 1 | 34.000 | 2 | 1_Testes_ARID4B: |
| 1_Testes_ARID4B:               | 151 in gene          | 1 | 40.000 | 1 | 1_Testes_ARID4B: |
| 1_Testes_ARID4B:               | 198224 in gene       | 1 | 27.000 | 1 | 1_Testes_ARID4B: |
| 1_Testes_ARID4B:               | 260 in gene          | 1 | 27.000 | 1 | 1_Testes_ARID4B: |
| 1_Testes_ARID4B:               | 73549 downstream     | 1 | 26.000 | 1 | 1_Testes_ARID4B: |
| 1_Testes_ARID4B:               | 355 in gene          | 1 | 26.000 | 1 | 1_Testes_ARID4B: |
| 1_Testes_ARID4B:               | -67 upstream         | 1 | 29.000 | 1 | 1_Testes_ARID4B: |
| 1_Testes_ARID4B:               | 16 in gene           | 1 | 29.000 | 1 | 1_Testes_ARID4B: |
| 1_Testes_ARID4B:               | 204 in gene          | 1 | 22.000 | 1 | 1_Testes_ARID4B: |
| 1_Testes_ARID4B:               | 94 in gene           | 1 | 43.000 | 1 | 1_Testes_ARID4B: |
| 1_Testes_ARID4B:               | 193 in gene          | 1 | 26.000 | 1 | 1_Testes_ARID4B: |
| 1_Testes_ARID4B:               | -361 upstream        | 1 | 22.000 | 1 | 1_Testes_ARID4B: |
| 1_Testes_ARID4B:               | 65 in gene           | 1 | 22.000 | 1 | 1_Testes_ARID4B: |
| 1_Testes_ARID4B:               | 107 in gene          | 1 | 37.000 | 1 | 1_Testes_ARID4B: |
| 1_Testes_ARID4B:               | 382 in gene          | 1 | 40.000 | 1 | 1_Testes_ARID4B: |
| 1_Testes_ARID4B:               | 308 in gene          | 1 | 22.000 | 1 | 1_Testes_ARID4B: |
| 1_Testes_ARID4B:               | -1601 upstream       | 1 | 22.000 | 1 | 1_Testes_ARID4B: |
| 1_Testes_ARID4B:               | 39 in gene           | 1 | 17.000 | 1 | 1_Testes_ARID4B: |
| 1_Testes_ARID4B:               | 2205 in gene         | 1 | 16.000 | 1 | 1_Testes_ARID4B: |
| 1_Testes_ARID4B:               | -412 upstream        | 1 | 24.000 | 1 | 1_Testes_ARID4B: |
| 1_Testes_ARID4B: 159, 112239   | in gene, downstream  | 1 | 24.000 | 2 | 1_Testes_ARID4B: |
| 1_Testes_ARID4B:               | 309 in gene          | 1 | 24.000 | 1 | 1_Testes_ARID4B: |
| 1_Testes_ARID4B:               | 439 in gene          | 1 | 33.000 | 1 | 1_Testes_ARID4B: |
| 1_Testes_ARID4B:               | -347 upstream        | 1 | 30.000 | 1 | 1_Testes_ARID4B: |
| 1_Testes_ARID4B:               | 170 in gene          | 1 | 30.000 | 1 | 1_Testes_ARID4B: |
| 1_Testes_ARID4B: 530, -558     | in gene, upstream    | 1 | 37.500 | 2 | 1_Testes_ARID4B: |

|                  |                                          |   |        |   |                  |
|------------------|------------------------------------------|---|--------|---|------------------|
| 1_Testes_ARID4B: | 401 in gene                              | 1 | 20.000 | 1 | 1_Testes_ARID4B: |
| 1_Testes_ARID4B: | 921 in gene                              | 1 | 35.000 | 1 | 1_Testes_ARID4B: |
| 1_Testes_ARID4B: | -1439 upstream                           | 1 | 35.000 | 1 | 1_Testes_ARID4B: |
| 1_Testes_ARID4B: | 38 in gene                               | 1 | 29.000 | 1 | 1_Testes_ARID4B: |
| 1_Testes_ARID4B: | 311 in gene                              | 1 | 24.000 | 1 | 1_Testes_ARID4B: |
| 1_Testes_ARID4B: | -4535 upstream                           | 1 | 24.000 | 1 | 1_Testes_ARID4B: |
| 1_Testes_ARID4B: | 233 in gene                              | 1 | 21.000 | 1 | 1_Testes_ARID4B: |
| 1_Testes_ARID4B: | 631 in gene                              | 1 | 29.000 | 1 | 1_Testes_ARID4B: |
| 1_Testes_ARID4B: | -1104 upstream                           | 1 | 31.000 | 1 | 1_Testes_ARID4B: |
| 1_Testes_ARID4B: | 157 in gene                              | 1 | 25.000 | 1 | 1_Testes_ARID4B: |
| 1_Testes_ARID4B: | -807 upstream                            | 1 | 25.000 | 1 | 1_Testes_ARID4B: |
| 1_Testes_ARID4B: | -1439, 513, 2785 upstream, in gene, in g | 1 | 24.000 | 3 | 1_Testes_ARID4B: |
| 1_Testes_ARID4B: | 623 in gene                              | 1 | 24.000 | 1 | 1_Testes_ARID4B: |
| 1_Testes_ARID4B: | -695 upstream                            | 1 | 24.000 | 1 | 1_Testes_ARID4B: |
| 1_Testes_ARID4B: | 128 in gene                              | 1 | 31.000 | 1 | 1_Testes_ARID4B: |
| 1_Testes_ARID4B: | 35 in gene                               | 1 | 26.000 | 1 | 1_Testes_ARID4B: |
| 1_Testes_ARID4B: | 183 in gene                              | 1 | 29.000 | 1 | 1_Testes_ARID4B: |
| 1_Testes_ARID4B: | 66 in gene                               | 1 | 26.000 | 1 | 1_Testes_ARID4B: |
| 1_Testes_ARID4B: | 62 in gene                               | 1 | 32.000 | 1 | 1_Testes_ARID4B: |
| 1_Testes_ARID4B: | 24, 33816 in gene, downstream            | 1 | 23.500 | 2 | 1_Testes_ARID4B: |
| 1_Testes_ARID4B: | 6220 downstream                          | 1 | 28.000 | 1 | 1_Testes_ARID4B: |
| 1_Testes_ARID4B: | 722 in gene                              | 1 | 28.000 | 1 | 1_Testes_ARID4B: |
| 1_Testes_ARID4B: | 393 in gene                              | 1 | 20.000 | 1 | 1_Testes_ARID4B: |
| 1_Testes_ARID4B: | 162 in gene                              | 1 | 37.000 | 1 | 1_Testes_ARID4B: |
| 1_Testes_ARID4B: | 363 in gene                              | 1 | 37.000 | 1 | 1_Testes_ARID4B: |
| 1_Testes_ARID4B: | 229 in gene                              | 1 | 28.000 | 1 | 1_Testes_ARID4B: |
| 1_Testes_ARID4B: | -185 upstream                            | 1 | 22.000 | 1 | 1_Testes_ARID4B: |
| 1_Testes_ARID4B: | 130 in gene                              | 1 | 22.000 | 1 | 1_Testes_ARID4B: |
| 1_Testes_ARID4B: | -1005 upstream                           | 1 | 29.000 | 1 | 1_Testes_ARID4B: |
| 1_Testes_ARID4B: | 481 in gene                              | 1 | 29.000 | 1 | 1_Testes_ARID4B: |
| 1_Testes_ARID4B: | 68 in gene                               | 1 | 18.000 | 1 | 1_Testes_ARID4B: |
| 1_Testes_ARID4B: | 17726 downstream                         | 1 | 18.000 | 1 | 1_Testes_ARID4B: |
| 1_Testes_ARID4B: | 274 in gene                              | 1 | 16.000 | 1 | 1_Testes_ARID4B: |
| 1_Testes_ARID4B: | 323 in gene                              | 1 | 20.000 | 1 | 1_Testes_ARID4B: |
| 1_Testes_ARID4B: | -1145 upstream                           | 1 | 20.000 | 1 | 1_Testes_ARID4B: |
| 1_Testes_ARID4B: | -377 upstream                            | 1 | 39.000 | 1 | 1_Testes_ARID4B: |
| 1_Testes_ARID4B: | 404 in gene                              | 1 | 39.000 | 1 | 1_Testes_ARID4B: |
| 1_Testes_ARID4B: | 326 in gene                              | 1 | 32.000 | 1 | 1_Testes_ARID4B: |
| 1_Testes_ARID4B: | 84986, 10 downstream, in gene            | 1 | 29.000 | 2 | 1_Testes_ARID4B: |
| 1_Testes_ARID4B: | 156 in gene                              | 1 | 37.000 | 1 | 1_Testes_ARID4B: |
| 1_Testes_ARID4B: | 630 in gene                              | 1 | 21.000 | 1 | 1_Testes_ARID4B: |
| 1_Testes_ARID4B: | 7 in gene                                | 1 | 38.000 | 1 | 1_Testes_ARID4B: |
| 1_Testes_ARID4B: | 375 in gene                              | 1 | 39.000 | 1 | 1_Testes_ARID4B: |
| 1_Testes_ARID4B: | 1 in gene                                | 1 | 22.000 | 1 | 1_Testes_ARID4B: |
| 1_Testes_ARID4B: | -7290, 18342 upstream, downstream        | 1 | 28.500 | 2 | 1_Testes_ARID4B: |
| 1_Testes_ARID4B: | 108 in gene                              | 1 | 35.000 | 1 | 1_Testes_ARID4B: |
| 1_Testes_ARID4B: | 983 in gene                              | 1 | 23.000 | 1 | 1_Testes_ARID4B: |



|                                          |                          |   |        |   |                  |
|------------------------------------------|--------------------------|---|--------|---|------------------|
| 1_Testes_ARID4B:                         | 770 in gene              | 1 | 28.000 | 1 | 1_Testes_ARID4B: |
| 1_Testes_ARID4B:                         | 286 in gene              | 1 | 29.000 | 1 | 1_Testes_ARID4B: |
| 1_Testes_ARID4B:                         | 282 in gene              | 1 | 28.000 | 1 | 1_Testes_ARID4B: |
| 1_Testes_ARID4B:                         | 236 in gene              | 1 | 40.000 | 1 | 1_Testes_ARID4B: |
| 1_Testes_ARID4B:                         | 159 in gene              | 1 | 30.000 | 1 | 1_Testes_ARID4B: |
| 1_Testes_ARID4B:                         | 270 in gene              | 1 | 24.000 | 1 | 1_Testes_ARID4B: |
| 1_Testes_ARID4B:                         | 204 downstream           | 1 | 21.000 | 1 | 1_Testes_ARID4B: |
| 1_Testes_ARID4B: 90985, 217              | downstream, in gene      | 1 | 19.000 | 2 | 1_Testes_ARID4B: |
| 1_Testes_ARID4B:                         | 123 in gene              | 1 | 26.000 | 1 | 1_Testes_ARID4B: |
| 1_Testes_ARID4B:                         | -2284 upstream           | 1 | 26.000 | 1 | 1_Testes_ARID4B: |
| 1_Testes_ARID4B:                         | 1012 in gene             | 1 | 17.000 | 1 | 1_Testes_ARID4B: |
| 1_Testes_ARID4B:                         | 293 in gene              | 1 | 26.000 | 1 | 1_Testes_ARID4B: |
| 1_Testes_ARID4B: -157, 771               | upstream, in gene        | 1 | 24.500 | 2 | 1_Testes_ARID4B: |
| 1_Testes_ARID4B:                         | 30043 downstream         | 1 | 29.000 | 1 | 1_Testes_ARID4B: |
| 1_Testes_ARID4B:                         | 62 in gene               | 1 | 29.000 | 1 | 1_Testes_ARID4B: |
| 1_Testes_ARID4B: 10642, -622             | downstream, upstream     | 1 | 32.000 | 2 | 1_Testes_ARID4B: |
| 1_Testes_ARID4B:                         | 84 in gene               | 1 | 35.000 | 1 | 1_Testes_ARID4B: |
| 1_Testes_ARID4B:                         | -6230 upstream           | 1 | 35.000 | 1 | 1_Testes_ARID4B: |
| 1_Testes_ARID4B:                         | -4072 upstream           | 1 | 25.000 | 1 | 1_Testes_ARID4B: |
| 1_Testes_ARID4B:                         | 653 in gene              | 1 | 25.000 | 1 | 1_Testes_ARID4B: |
| 1_Testes_ARID4B:                         | 6005 downstream          | 1 | 25.000 | 1 | 1_Testes_ARID4B: |
| 1_Testes_ARID4B:                         | -6225 upstream           | 1 | 25.000 | 1 | 1_Testes_ARID4B: |
| 1_Testes_ARID4B:                         | 232 in gene              | 1 | 21.000 | 1 | 1_Testes_ARID4B: |
| 1_Testes_ARID4B:                         | 524 in gene              | 1 | 19.000 | 1 | 1_Testes_ARID4B: |
| 1_Testes_ARID4B: 14965, -8683            | downstream, upstream     | 1 | 19.000 | 2 | 1_Testes_ARID4B: |
| 1_Testes_ARID4B: 726, -5162              | in gene, upstream        | 1 | 19.500 | 2 | 1_Testes_ARID4B: |
| 1_Testes_ARID4B: 6381, 493               | downstream, in gene      | 1 | 19.500 | 2 | 1_Testes_ARID4B: |
| 1_Testes_ARID4B: -5921, -33              | upstream, upstream       | 1 | 19.500 | 2 | 1_Testes_ARID4B: |
| 1_Testes_ARID4B: 22294, 16406            | downstream, downstre     | 1 | 19.500 | 2 | 1_Testes_ARID4B: |
| 1_Testes_ARID4B:                         | 218 in gene              | 1 | 23.000 | 1 | 1_Testes_ARID4B: |
| 1_Testes_ARID4B:                         | 523 in gene              | 1 | 19.000 | 1 | 1_Testes_ARID4B: |
| 1_Testes_ARID4B:                         | 10716 downstream         | 1 | 19.000 | 1 | 1_Testes_ARID4B: |
| 1_Testes_ARID4B:                         | 11941 downstream         | 1 | 20.000 | 1 | 1_Testes_ARID4B: |
| 1_Testes_ARID4B:                         | -4436 upstream           | 1 | 20.000 | 1 | 1_Testes_ARID4B: |
| 1_Testes_ARID4B:                         | 7679 in gene             | 1 | 20.000 | 1 | 1_Testes_ARID4B: |
| 1_Testes_ARID4B: 518, 19734, 22118, 235  | in gene, downstream, c   | 1 | 26.000 | 4 | 1_Testes_ARID4B: |
| 1_Testes_ARID4B: 3983, 1599, 175         | in gene, in gene, in gen | 1 | 28.333 | 3 | 1_Testes_ARID4B: |
| 1_Testes_ARID4B: -4403, -2019, -595, 999 | upstream, upstream, u    | 1 | 28.000 | 4 | 1_Testes_ARID4B: |
| 1_Testes_ARID4B: -10537, 55              | upstream, in gene        | 1 | 28.500 | 2 | 1_Testes_ARID4B: |
| 1_Testes_ARID4B:                         | 3486 in gene             | 1 | 19.000 | 1 | 1_Testes_ARID4B: |
| 1_Testes_ARID4B:                         | 8774 downstream          | 1 | 19.000 | 1 | 1_Testes_ARID4B: |
| 1_Testes_ARID4B:                         | 20401 downstream         | 1 | 32.000 | 1 | 1_Testes_ARID4B: |
| 1_Testes_ARID4B: 270, 23790              | in gene, downstream      | 1 | 29.000 | 2 | 1_Testes_ARID4B: |
| 1_Testes_ARID4B: 154, 24410              | in gene, downstream      | 1 | 27.000 | 2 | 1_Testes_ARID4B: |
| 1_Testes_ARID4B: 85, 9813, 13973         | in gene, downstream, c   | 1 | 23.333 | 3 | 1_Testes_ARID4B: |
| 1_Testes_ARID4B: -1894, 7834             | upstream, downstream     | 1 | 24.500 | 2 | 1_Testes_ARID4B: |
| 1_Testes_ARID4B: -9391, 337, 4497        | upstream, in gene, in g  | 1 | 23.333 | 3 | 1_Testes_ARID4B: |

|                                    |                          |   |        |   |                  |
|------------------------------------|--------------------------|---|--------|---|------------------|
| 1_Testes_ARID4B:                   | 277 in gene              | 1 | 30.000 | 1 | 1_Testes_ARID4B: |
| 1_Testes_ARID4B:                   | 6434 downstream          | 1 | 18.000 | 1 | 1_Testes_ARID4B: |
| 1_Testes_ARID4B:                   | 209 in gene              | 1 | 18.000 | 1 | 1_Testes_ARID4B: |
| 1_Testes_ARID4B: 56, 30664         | in gene, downstream      | 1 | 20.500 | 2 | 1_Testes_ARID4B: |
| 1_Testes_ARID4B: 1541, -7323       | in gene, upstream        | 1 | 19.000 | 2 | 1_Testes_ARID4B: |
| 1_Testes_ARID4B: -8628, 236        | upstream, in gene        | 1 | 19.000 | 2 | 1_Testes_ARID4B: |
| 1_Testes_ARID4B:                   | -644 upstream            | 1 | 26.000 | 1 | 1_Testes_ARID4B: |
| 1_Testes_ARID4B:                   | 195 in gene              | 1 | 37.000 | 1 | 1_Testes_ARID4B: |
| 1_Testes_ARID4B:                   | -4008 upstream           | 1 | 26.000 | 1 | 1_Testes_ARID4B: |
| 1_Testes_ARID4B:                   | 185 in gene              | 1 | 26.000 | 1 | 1_Testes_ARID4B: |
| 1_Testes_ARID4B:                   | 14242 downstream         | 1 | 33.000 | 1 | 1_Testes_ARID4B: |
| 1_Testes_ARID4B:                   | -782 upstream            | 1 | 33.000 | 1 | 1_Testes_ARID4B: |
| 1_Testes_ARID4B:                   | -524 upstream            | 1 | 33.000 | 1 | 1_Testes_ARID4B: |
| 1_Testes_ARID4B: 1097, 14441       | in gene, downstream      | 1 | 34.000 | 2 | 1_Testes_ARID4B: |
| 1_Testes_ARID4B: 9281, -4063       | downstream, upstream     | 1 | 34.000 | 2 | 1_Testes_ARID4B: |
| 1_Testes_ARID4B: 13508, 164        | downstream, in gene      | 1 | 34.000 | 2 | 1_Testes_ARID4B: |
| 1_Testes_ARID4B:                   | -10453 upstream          | 1 | 35.000 | 1 | 1_Testes_ARID4B: |
| 1_Testes_ARID4B:                   | 66 in gene               | 1 | 34.000 | 1 | 1_Testes_ARID4B: |
| 1_Testes_ARID4B:                   | 1685 in gene             | 1 | 47.000 | 1 | 1_Testes_ARID4B: |
| 1_Testes_ARID4B:                   | -918 upstream            | 1 | 22.000 | 1 | 1_Testes_ARID4B: |
| 1_Testes_ARID4B:                   | 1365 in gene             | 1 | 22.000 | 1 | 1_Testes_ARID4B: |
| 1_Testes_ARID4B:                   | 131 in gene              | 1 | 22.000 | 1 | 1_Testes_ARID4B: |
| 1_Testes_ARID4B:                   | 43221 downstream         | 1 | 22.000 | 1 | 1_Testes_ARID4B: |
| 1_Testes_ARID4B:                   | -696 upstream            | 1 | 26.000 | 1 | 1_Testes_ARID4B: |
| 1_Testes_ARID4B:                   | 10 in gene               | 1 | 26.000 | 1 | 1_Testes_ARID4B: |
| 1_Testes_ARID4B:                   | -123 upstream            | 1 | 31.000 | 1 | 1_Testes_ARID4B: |
| 1_Testes_ARID4B:                   | 62 in gene               | 1 | 31.000 | 1 | 1_Testes_ARID4B: |
| 1_Testes_ARID4B:                   | 31567 downstream         | 1 | 22.000 | 1 | 1_Testes_ARID4B: |
| 1_Testes_ARID4B:                   | 149 in gene              | 1 | 22.000 | 1 | 1_Testes_ARID4B: |
| 1_Testes_ARID4B:                   | 511 in gene              | 1 | 31.000 | 1 | 1_Testes_ARID4B: |
| 1_Testes_ARID4B: 7151, 3855, 495   | in gene, in gene, in gen | 1 | 21.667 | 3 | 1_Testes_ARID4B: |
| 1_Testes_ARID4B: 48, 3344, 6704    | in gene, downstream, c   | 1 | 21.667 | 3 | 1_Testes_ARID4B: |
| 1_Testes_ARID4B: 37605, 34245, 453 | downstream, downstre     | 1 | 25.667 | 3 | 1_Testes_ARID4B: |
| 1_Testes_ARID4B:                   | -814 upstream            | 1 | 35.000 | 1 | 1_Testes_ARID4B: |
| 1_Testes_ARID4B:                   | 53598 downstream         | 1 | 35.000 | 1 | 1_Testes_ARID4B: |
| 1_Testes_ARID4B: -326, -1686       | upstream, upstream       | 1 | 20.500 | 2 | 1_Testes_ARID4B: |
| 1_Testes_ARID4B:                   | 767 in gene              | 1 | 18.000 | 1 | 1_Testes_ARID4B: |
| 1_Testes_ARID4B:                   | 89 in gene               | 1 | 32.000 | 1 | 1_Testes_ARID4B: |
| 1_Testes_ARID4B: 21161, 393        | downstream, in gene      | 1 | 25.500 | 2 | 1_Testes_ARID4B: |
| 1_Testes_ARID4B:                   | 307 in gene              | 1 | 30.000 | 1 | 1_Testes_ARID4B: |
| 1_Testes_ARID4B: 54984, 21512, 136 | downstream, in gene, i   | 1 | 26.333 | 3 | 1_Testes_ARID4B: |
| 1_Testes_ARID4B: 90, 26362         | in gene, downstream      | 1 | 30.500 | 2 | 1_Testes_ARID4B: |
| 1_Testes_ARID4B:                   | 29 in gene               | 1 | 31.000 | 1 | 1_Testes_ARID4B: |
| 1_Testes_ARID4B:                   | 230 in gene              | 1 | 24.000 | 1 | 1_Testes_ARID4B: |
| 1_Testes_ARID4B:                   | 16160 downstream         | 1 | 24.000 | 1 | 1_Testes_ARID4B: |
| 1_Testes_ARID4B:                   | -6353 upstream           | 1 | 29.000 | 1 | 1_Testes_ARID4B: |
| 1_Testes_ARID4B:                   | 194 in gene              | 1 | 29.000 | 1 | 1_Testes_ARID4B: |

|                              |                      |   |        |   |                  |
|------------------------------|----------------------|---|--------|---|------------------|
| 1_Testes_ARID4B:             | 291 in gene          | 1 | 31.000 | 1 | 1_Testes_ARID4B: |
| 1_Testes_ARID4B:             | 145 in gene          | 1 | 28.000 | 1 | 1_Testes_ARID4B: |
| 1_Testes_ARID4B:             | 7253 downstream      | 1 | 28.000 | 1 | 1_Testes_ARID4B: |
| 1_Testes_ARID4B:             | 467 in gene          | 1 | 32.000 | 1 | 1_Testes_ARID4B: |
| 1_Testes_ARID4B: 332, 26988  | in gene, downstream  | 1 | 27.000 | 2 | 1_Testes_ARID4B: |
| 1_Testes_ARID4B:             | 482 in gene          | 1 | 30.000 | 1 | 1_Testes_ARID4B: |
| 1_Testes_ARID4B:             | 588 in gene          | 1 | 35.000 | 1 | 1_Testes_ARID4B: |
| 1_Testes_ARID4B:             | -7682 upstream       | 1 | 28.000 | 1 | 1_Testes_ARID4B: |
| 1_Testes_ARID4B:             | 120 in gene          | 1 | 28.000 | 1 | 1_Testes_ARID4B: |
| 1_Testes_ARID4B:             | 425 in gene          | 1 | 25.000 | 1 | 1_Testes_ARID4B: |
| 1_Testes_ARID4B:             | 99 in gene           | 1 | 32.000 | 1 | 1_Testes_ARID4B: |
| 1_Testes_ARID4B:             | -5549 upstream       | 1 | 32.000 | 1 | 1_Testes_ARID4B: |
| 1_Testes_ARID4B:             | 12681 downstream     | 1 | 32.000 | 1 | 1_Testes_ARID4B: |
| 1_Testes_ARID4B:             | 451 in gene          | 1 | 20.000 | 1 | 1_Testes_ARID4B: |
| 1_Testes_ARID4B: 40183, 439  | in gene, in gene     | 1 | 24.000 | 2 | 1_Testes_ARID4B: |
| 1_Testes_ARID4B:             | 129 in gene          | 1 | 29.000 | 1 | 1_Testes_ARID4B: |
| 1_Testes_ARID4B:             | 37983 downstream     | 1 | 29.000 | 1 | 1_Testes_ARID4B: |
| 1_Testes_ARID4B:             | -286 upstream        | 1 | 24.000 | 1 | 1_Testes_ARID4B: |
| 1_Testes_ARID4B:             | 88896 downstream     | 1 | 24.000 | 1 | 1_Testes_ARID4B: |
| 1_Testes_ARID4B:             | 11276 in gene        | 1 | 27.000 | 1 | 1_Testes_ARID4B: |
| 1_Testes_ARID4B:             | 373 in gene          | 1 | 22.000 | 1 | 1_Testes_ARID4B: |
| 1_Testes_ARID4B:             | -459 upstream        | 1 | 19.000 | 1 | 1_Testes_ARID4B: |
| 1_Testes_ARID4B:             | 142 in gene          | 1 | 19.000 | 1 | 1_Testes_ARID4B: |
| 1_Testes_ARID4B:             | 115 in gene          | 1 | 23.000 | 1 | 1_Testes_ARID4B: |
| 1_Testes_ARID4B: 4249, 2777  | in gene, in gene     | 1 | 20.000 | 2 | 1_Testes_ARID4B: |
| 1_Testes_ARID4B: 5592, 7064  | downstream, downstre | 1 | 20.000 | 2 | 1_Testes_ARID4B: |
| 1_Testes_ARID4B:             | 694 in gene          | 1 | 28.000 | 1 | 1_Testes_ARID4B: |
| 1_Testes_ARID4B:             | 407 in gene          | 1 | 27.000 | 1 | 1_Testes_ARID4B: |
| 1_Testes_ARID4B:             | 158 in gene          | 1 | 30.000 | 1 | 1_Testes_ARID4B: |
| 1_Testes_ARID4B:             | 400 in gene          | 1 | 26.000 | 1 | 1_Testes_ARID4B: |
| 1_Testes_ARID4B:             | 409 in gene          | 1 | 27.000 | 1 | 1_Testes_ARID4B: |
| 1_Testes_ARID4B: 123, 88971  | in gene, in gene     | 1 | 29.500 | 2 | 1_Testes_ARID4B: |
| 1_Testes_ARID4B:             | 556 in gene          | 1 | 25.000 | 1 | 1_Testes_ARID4B: |
| 1_Testes_ARID4B:             | 84 in gene           | 1 | 35.000 | 1 | 1_Testes_ARID4B: |
| 1_Testes_ARID4B:             | 207 in gene          | 1 | 23.000 | 1 | 1_Testes_ARID4B: |
| 1_Testes_ARID4B:             | 235 in gene          | 1 | 22.000 | 1 | 1_Testes_ARID4B: |
| 1_Testes_ARID4B:             | 261 in gene          | 1 | 33.000 | 1 | 1_Testes_ARID4B: |
| 1_Testes_ARID4B:             | 912 in gene          | 1 | 15.000 | 1 | 1_Testes_ARID4B: |
| 1_Testes_ARID4B: 9996, -8484 | in gene, upstream    | 1 | 42.500 | 2 | 1_Testes_ARID4B: |
| 1_Testes_ARID4B:             | 283 in gene          | 1 | 20.000 | 1 | 1_Testes_ARID4B: |
| 1_Testes_ARID4B:             | 175 in gene          | 1 | 65.000 | 1 | 1_Testes_ARID4B: |
| 1_Testes_ARID4B:             | 279 in gene          | 1 | 34.000 | 1 | 1_Testes_ARID4B: |
| 1_Testes_ARID4B:             | 190801 downstream    | 1 | 32.000 | 1 | 1_Testes_ARID4B: |
| 1_Testes_ARID4B:             | 250 in gene          | 1 | 32.000 | 1 | 1_Testes_ARID4B: |
| 1_Testes_ARID4B:             | 202 in gene          | 1 | 28.000 | 1 | 1_Testes_ARID4B: |
| 1_Testes_ARID4B:             | 326 in gene          | 1 | 22.000 | 1 | 1_Testes_ARID4B: |
| 1_Testes_ARID4B:             | -6746 upstream       | 1 | 15.000 | 1 | 1_Testes_ARID4B: |

|                                    |                        |   |        |   |                  |
|------------------------------------|------------------------|---|--------|---|------------------|
| 1_Testes_ARID4B:                   | 3744 in gene           | 1 | 15.000 | 1 | 1_Testes_ARID4B: |
| 1_Testes_ARID4B: 65, 41905         | in gene, downstream    | 1 | 28.000 | 2 | 1_Testes_ARID4B: |
| 1_Testes_ARID4B:                   | 896 in gene            | 1 | 32.000 | 1 | 1_Testes_ARID4B: |
| 1_Testes_ARID4B:                   | -251 upstream          | 1 | 32.000 | 1 | 1_Testes_ARID4B: |
| 1_Testes_ARID4B:                   | 17 in gene             | 1 | 29.000 | 1 | 1_Testes_ARID4B: |
| 1_Testes_ARID4B:                   | 21351 downstream       | 1 | 31.000 | 1 | 1_Testes_ARID4B: |
| 1_Testes_ARID4B:                   | 232 in gene            | 1 | 31.000 | 1 | 1_Testes_ARID4B: |
| 1_Testes_ARID4B:                   | -142 upstream          | 1 | 31.000 | 1 | 1_Testes_ARID4B: |
| 1_Testes_ARID4B:                   | 126 in gene            | 1 | 29.000 | 1 | 1_Testes_ARID4B: |
| 1_Testes_ARID4B:                   | -2487 upstream         | 1 | 29.000 | 1 | 1_Testes_ARID4B: |
| 1_Testes_ARID4B:                   | 36637 in gene          | 1 | 29.000 | 1 | 1_Testes_ARID4B: |
| 1_Testes_ARID4B:                   | 52 in gene             | 1 | 22.000 | 1 | 1_Testes_ARID4B: |
| 1_Testes_ARID4B:                   | 481 in gene            | 1 | 19.000 | 1 | 1_Testes_ARID4B: |
| 1_Testes_ARID4B:                   | 525 in gene            | 1 | 32.000 | 1 | 1_Testes_ARID4B: |
| 1_Testes_ARID4B:                   | -4937 upstream         | 1 | 21.000 | 1 | 1_Testes_ARID4B: |
| 1_Testes_ARID4B:                   | -199 upstream          | 1 | 21.000 | 1 | 1_Testes_ARID4B: |
| 1_Testes_ARID4B: 17077, 597, -4395 | downstream, in gene, u | 1 | 23.333 | 3 | 1_Testes_ARID4B: |
| 1_Testes_ARID4B: -4809, 183        | upstream, in gene      | 1 | 24.500 | 2 | 1_Testes_ARID4B: |
| 1_Testes_ARID4B: 40926, -2         | downstream, upstream   | 1 | 24.500 | 2 | 1_Testes_ARID4B: |
| 1_Testes_ARID4B:                   | -8984 upstream         | 1 | 23.000 | 1 | 1_Testes_ARID4B: |
| 1_Testes_ARID4B:                   | 244 in gene            | 1 | 30.000 | 1 | 1_Testes_ARID4B: |
| 1_Testes_ARID4B:                   | -5855 upstream         | 1 | 18.000 | 1 | 1_Testes_ARID4B: |
| 1_Testes_ARID4B:                   | 163 in gene            | 1 | 18.000 | 1 | 1_Testes_ARID4B: |
| 1_Testes_ARID4B:                   | -248 upstream          | 1 | 28.000 | 1 | 1_Testes_ARID4B: |
| 1_Testes_ARID4B: 15558, 134        | downstream, in gene    | 1 | 29.500 | 2 | 1_Testes_ARID4B: |
| 1_Testes_ARID4B: 3204, 436         | downstream, in gene    | 1 | 19.500 | 2 | 1_Testes_ARID4B: |
| 1_Testes_ARID4B:                   | 310594 downstream      | 1 | 21.000 | 1 | 1_Testes_ARID4B: |
| 1_Testes_ARID4B:                   | 153 in gene            | 1 | 21.000 | 1 | 1_Testes_ARID4B: |
| 1_Testes_ARID4B:                   | 473 in gene            | 1 | 22.000 | 1 | 1_Testes_ARID4B: |
| 1_Testes_ARID4B:                   | 256 in gene            | 1 | 22.000 | 1 | 1_Testes_ARID4B: |
| 1_Testes_ARID4B: 145817, -7        | downstream, upstream   | 1 | 22.000 | 2 | 1_Testes_ARID4B: |
| 1_Testes_ARID4B:                   | 916947 in gene         | 1 | 18.000 | 1 | 1_Testes_ARID4B: |
| 1_Testes_ARID4B:                   | 2659 in gene           | 1 | 33.000 | 1 | 1_Testes_ARID4B: |
| 1_Testes_ARID4B: 40893, -611       | downstream, upstream   | 1 | 31.500 | 2 | 1_Testes_ARID4B: |
| 1_Testes_ARID4B:                   | 406 in gene            | 1 | 30.000 | 1 | 1_Testes_ARID4B: |
| 1_Testes_ARID4B:                   | -7672 upstream         | 1 | 18.000 | 1 | 1_Testes_ARID4B: |
| 1_Testes_ARID4B:                   | 189 in gene            | 1 | 18.000 | 1 | 1_Testes_ARID4B: |
| 1_Testes_ARID4B:                   | 176 in gene            | 1 | 27.000 | 1 | 1_Testes_ARID4B: |
| 1_Testes_ARID4B:                   | 212 in gene            | 1 | 31.000 | 1 | 1_Testes_ARID4B: |
| 1_Testes_ARID4B:                   | 172 in gene            | 1 | 31.000 | 1 | 1_Testes_ARID4B: |
| 1_Testes_ARID4B:                   | 186 in gene            | 1 | 20.000 | 1 | 1_Testes_ARID4B: |
| 1_Testes_ARID4B:                   | 44069 downstream       | 1 | 21.000 | 1 | 1_Testes_ARID4B: |
| 1_Testes_ARID4B:                   | 188 in gene            | 1 | 21.000 | 1 | 1_Testes_ARID4B: |
| 1_Testes_ARID4B:                   | 407 in gene            | 1 | 23.000 | 1 | 1_Testes_ARID4B: |
| 1_Testes_ARID4B:                   | 10966 downstream       | 1 | 23.000 | 1 | 1_Testes_ARID4B: |
| 1_Testes_ARID4B:                   | 1003 in gene           | 1 | 18.000 | 1 | 1_Testes_ARID4B: |
| 1_Testes_ARID4B:                   | 120 in gene            | 1 | 19.000 | 1 | 1_Testes_ARID4B: |

|                              |                      |   |        |   |                  |
|------------------------------|----------------------|---|--------|---|------------------|
| 1_Testes_ARID4B:             | 88 in gene           | 1 | 38.000 | 1 | 1_Testes_ARID4B: |
| 1_Testes_ARID4B:             | -1585 upstream       | 1 | 38.000 | 1 | 1_Testes_ARID4B: |
| 1_Testes_ARID4B:             | -2691 upstream       | 1 | 38.000 | 1 | 1_Testes_ARID4B: |
| 1_Testes_ARID4B:             | 16943 downstream     | 1 | 38.000 | 1 | 1_Testes_ARID4B: |
| 1_Testes_ARID4B:             | 11654 in gene        | 1 | 24.000 | 1 | 1_Testes_ARID4B: |
| 1_Testes_ARID4B:             | 15701 downstream     | 1 | 24.000 | 1 | 1_Testes_ARID4B: |
| 1_Testes_ARID4B:             | 9392 downstream      | 1 | 17.000 | 1 | 1_Testes_ARID4B: |
| 1_Testes_ARID4B:             | 17681 in gene        | 1 | 17.000 | 1 | 1_Testes_ARID4B: |
| 1_Testes_ARID4B:             | 164 in gene          | 1 | 34.000 | 1 | 1_Testes_ARID4B: |
| 1_Testes_ARID4B:             | 374 in gene          | 1 | 31.000 | 1 | 1_Testes_ARID4B: |
| 1_Testes_ARID4B: 53, 53077   | in gene, downstream  | 1 | 22.500 | 2 | 1_Testes_ARID4B: |
| 1_Testes_ARID4B:             | 481 in gene          | 1 | 24.000 | 1 | 1_Testes_ARID4B: |
| 1_Testes_ARID4B:             | -32 upstream         | 1 | 23.000 | 1 | 1_Testes_ARID4B: |
| 1_Testes_ARID4B:             | 35837 downstream     | 1 | 39.000 | 1 | 1_Testes_ARID4B: |
| 1_Testes_ARID4B:             | 102 in gene          | 1 | 39.000 | 1 | 1_Testes_ARID4B: |
| 1_Testes_ARID4B: -311, 5769  | upstream, in gene    | 1 | 25.000 | 2 | 1_Testes_ARID4B: |
| 1_Testes_ARID4B: 13447, 7367 | downstream, downstre | 1 | 25.000 | 2 | 1_Testes_ARID4B: |
| 1_Testes_ARID4B:             | 368 in gene          | 1 | 29.000 | 1 | 1_Testes_ARID4B: |
| 1_Testes_ARID4B: 33705, 137  | downstream, in gene  | 1 | 31.500 | 2 | 1_Testes_ARID4B: |
| 1_Testes_ARID4B:             | 377 in gene          | 1 | 43.000 | 1 | 1_Testes_ARID4B: |
| 1_Testes_ARID4B:             | 550 in gene          | 1 | 24.000 | 1 | 1_Testes_ARID4B: |
| 1_Testes_ARID4B:             | -537 upstream        | 1 | 28.000 | 1 | 1_Testes_ARID4B: |
| 1_Testes_ARID4B:             | 317 in gene          | 1 | 28.000 | 1 | 1_Testes_ARID4B: |
| 1_Testes_ARID4B:             | 21259 downstream     | 1 | 37.000 | 1 | 1_Testes_ARID4B: |
| 1_Testes_ARID4B:             | 865 in gene          | 1 | 37.000 | 1 | 1_Testes_ARID4B: |
| 1_Testes_ARID4B:             | 163 in gene          | 1 | 33.000 | 1 | 1_Testes_ARID4B: |
| 1_Testes_ARID4B: 15960, 24   | downstream, in gene  | 1 | 29.500 | 2 | 1_Testes_ARID4B: |
| 1_Testes_ARID4B: 15201, 721  | downstream, in gene  | 1 | 21.500 | 2 | 1_Testes_ARID4B: |
| 1_Testes_ARID4B:             | -602 upstream        | 1 | 17.000 | 1 | 1_Testes_ARID4B: |
| 1_Testes_ARID4B:             | 450 in gene          | 1 | 36.000 | 1 | 1_Testes_ARID4B: |
| 1_Testes_ARID4B:             | -7279 upstream       | 1 | 36.000 | 1 | 1_Testes_ARID4B: |
| 1_Testes_ARID4B:             | 1129 in gene         | 1 | 29.000 | 1 | 1_Testes_ARID4B: |
| 1_Testes_ARID4B: 306, -3950  | in gene, upstream    | 1 | 26.500 | 2 | 1_Testes_ARID4B: |
| 1_Testes_ARID4B: -4061, 195  | upstream, in gene    | 1 | 26.500 | 2 | 1_Testes_ARID4B: |
| 1_Testes_ARID4B:             | 328 in gene          | 1 | 40.000 | 1 | 1_Testes_ARID4B: |
| 1_Testes_ARID4B:             | 357 in gene          | 1 | 30.000 | 1 | 1_Testes_ARID4B: |
| 1_Testes_ARID4B:             | -1372 upstream       | 1 | 30.000 | 1 | 1_Testes_ARID4B: |
| 1_Testes_ARID4B:             | -309 upstream        | 1 | 24.000 | 1 | 1_Testes_ARID4B: |
| 1_Testes_ARID4B:             | 6825 in gene         | 1 | 24.000 | 1 | 1_Testes_ARID4B: |
| 1_Testes_ARID4B:             | -203 upstream        | 1 | 33.000 | 1 | 1_Testes_ARID4B: |
| 1_Testes_ARID4B:             | 62 in gene           | 1 | 17.000 | 1 | 1_Testes_ARID4B: |
| 1_Testes_ARID4B:             | 255 in gene          | 1 | 48.000 | 1 | 1_Testes_ARID4B: |
| 1_Testes_ARID4B:             | 65 in gene           | 1 | 24.000 | 1 | 1_Testes_ARID4B: |
| 1_Testes_ARID4B:             | -362 upstream        | 1 | 26.000 | 1 | 1_Testes_ARID4B: |
| 1_Testes_ARID4B:             | 267 in gene          | 1 | 26.000 | 1 | 1_Testes_ARID4B: |
| 1_Testes_ARID4B:             | -8119 upstream       | 1 | 22.000 | 1 | 1_Testes_ARID4B: |
| 1_Testes_ARID4B:             | 1603 in gene         | 1 | 22.000 | 1 | 1_Testes_ARID4B: |

|                  |                                                 |   |        |   |                  |
|------------------|-------------------------------------------------|---|--------|---|------------------|
| 1_Testes_ARID4B: | 8783 downstream                                 | 1 | 22.000 | 1 | 1_Testes_ARID4B: |
| 1_Testes_ARID4B: | -271 upstream                                   | 1 | 31.000 | 1 | 1_Testes_ARID4B: |
| 1_Testes_ARID4B: | 205 in gene                                     | 1 | 31.000 | 1 | 1_Testes_ARID4B: |
| 1_Testes_ARID4B: | 71 in gene                                      | 1 | 28.000 | 1 | 1_Testes_ARID4B: |
| 1_Testes_ARID4B: | 162 in gene                                     | 1 | 34.000 | 1 | 1_Testes_ARID4B: |
| 1_Testes_ARID4B: | -37 upstream                                    | 1 | 20.000 | 1 | 1_Testes_ARID4B: |
| 1_Testes_ARID4B: | 48026 downstream                                | 1 | 20.000 | 1 | 1_Testes_ARID4B: |
| 1_Testes_ARID4B: | 173 in gene                                     | 1 | 22.000 | 1 | 1_Testes_ARID4B: |
| 1_Testes_ARID4B: | 535 in gene                                     | 1 | 35.000 | 1 | 1_Testes_ARID4B: |
| 1_Testes_ARID4B: | -5937 upstream                                  | 1 | 29.000 | 1 | 1_Testes_ARID4B: |
| 1_Testes_ARID4B: | 90 in gene                                      | 1 | 29.000 | 1 | 1_Testes_ARID4B: |
| 1_Testes_ARID4B: | 7036 in gene                                    | 1 | 26.000 | 1 | 1_Testes_ARID4B: |
| 1_Testes_ARID4B: | 191 in gene                                     | 1 | 32.000 | 1 | 1_Testes_ARID4B: |
| 1_Testes_ARID4B: | 191 in gene                                     | 1 | 33.000 | 1 | 1_Testes_ARID4B: |
| 1_Testes_ARID4B: | -6862 upstream                                  | 1 | 20.000 | 1 | 1_Testes_ARID4B: |
| 1_Testes_ARID4B: | 204 in gene                                     | 1 | 20.000 | 1 | 1_Testes_ARID4B: |
| 1_Testes_ARID4B: | 244 in gene                                     | 1 | 20.000 | 1 | 1_Testes_ARID4B: |
| 1_Testes_ARID4B: | -265 upstream                                   | 1 | 20.000 | 1 | 1_Testes_ARID4B: |
| 1_Testes_ARID4B: | -130 upstream                                   | 1 | 22.000 | 1 | 1_Testes_ARID4B: |
| 1_Testes_ARID4B: | 12514 downstream                                | 1 | 22.000 | 1 | 1_Testes_ARID4B: |
| 1_Testes_ARID4B: | 651 in gene                                     | 1 | 26.000 | 1 | 1_Testes_ARID4B: |
| 1_Testes_ARID4B: | 472 in gene                                     | 1 | 46.000 | 1 | 1_Testes_ARID4B: |
| 1_Testes_ARID4B: | 203 in gene                                     | 1 | 28.000 | 1 | 1_Testes_ARID4B: |
| 1_Testes_ARID4B: | -3318 upstream                                  | 1 | 28.000 | 1 | 1_Testes_ARID4B: |
| 1_Testes_ARID4B: | 755 in gene                                     | 1 | 21.000 | 1 | 1_Testes_ARID4B: |
| 1_Testes_ARID4B: | 22515 downstream                                | 1 | 21.000 | 1 | 1_Testes_ARID4B: |
| 1_Testes_ARID4B: | 14715 downstream                                | 1 | 26.000 | 1 | 1_Testes_ARID4B: |
| 1_Testes_ARID4B: | -446 upstream                                   | 1 | 26.000 | 1 | 1_Testes_ARID4B: |
| 1_Testes_ARID4B: | 380 in gene                                     | 1 | 26.000 | 1 | 1_Testes_ARID4B: |
| 1_Testes_ARID4B: | 6317, -8339 in gene, upstream                   | 1 | 24.000 | 2 | 1_Testes_ARID4B: |
| 1_Testes_ARID4B: | 15056, 400, -10288 downstream, in gene, u       | 1 | 24.667 | 3 | 1_Testes_ARID4B: |
| 1_Testes_ARID4B: | 10879, 191, -6081, -668 downstream, in gene, u  | 1 | 29.250 | 4 | 1_Testes_ARID4B: |
| 1_Testes_ARID4B: | -277, 5995, 6603 upstream, downstream           | 1 | 29.667 | 3 | 1_Testes_ARID4B: |
| 1_Testes_ARID4B: | -6121, 151, 759 upstream, in gene, in g         | 1 | 29.667 | 3 | 1_Testes_ARID4B: |
| 1_Testes_ARID4B: | 26027, 19755, 19147, 2 downstream, downstre     | 1 | 31.500 | 4 | 1_Testes_ARID4B: |
| 1_Testes_ARID4B: | 272 in gene                                     | 1 | 19.000 | 1 | 1_Testes_ARID4B: |
| 1_Testes_ARID4B: | 683 in gene                                     | 1 | 19.000 | 1 | 1_Testes_ARID4B: |
| 1_Testes_ARID4B: | -319 upstream                                   | 1 | 19.000 | 1 | 1_Testes_ARID4B: |
| 1_Testes_ARID4B: | 183, -8489 in gene, upstream                    | 1 | 32.000 | 2 | 1_Testes_ARID4B: |
| 1_Testes_ARID4B: | -8489, 183 upstream, in gene                    | 1 | 32.000 | 2 | 1_Testes_ARID4B: |
| 1_Testes_ARID4B: | 16810 downstream                                | 1 | 28.000 | 1 | 1_Testes_ARID4B: |
| 1_Testes_ARID4B: | -82 upstream                                    | 1 | 28.000 | 1 | 1_Testes_ARID4B: |
| 1_Testes_ARID4B: | 71815 downstream                                | 1 | 28.000 | 1 | 1_Testes_ARID4B: |
| 1_Testes_ARID4B: | 779, 35403, 71723, 104 in gene, in gene, in gen | 1 | 24.500 | 4 | 1_Testes_ARID4B: |
| 1_Testes_ARID4B: | 9420 downstream                                 | 1 | 34.000 | 1 | 1_Testes_ARID4B: |
| 1_Testes_ARID4B: | 10844 in gene                                   | 1 | 18.000 | 1 | 1_Testes_ARID4B: |
| 1_Testes_ARID4B: | -693 upstream                                   | 1 | 28.000 | 1 | 1_Testes_ARID4B: |

|                              |                      |   |        |   |                  |
|------------------------------|----------------------|---|--------|---|------------------|
| 1_Testes_ARID4B:             | 647 in gene          | 1 | 28.000 | 1 | 1_Testes_ARID4B: |
| 1_Testes_ARID4B:             | 69213 downstream     | 1 | 40.000 | 1 | 1_Testes_ARID4B: |
| 1_Testes_ARID4B:             | 869 in gene          | 1 | 40.000 | 1 | 1_Testes_ARID4B: |
| 1_Testes_ARID4B:             | 246 in gene          | 1 | 24.000 | 1 | 1_Testes_ARID4B: |
| 1_Testes_ARID4B:             | 53 in gene           | 1 | 23.000 | 1 | 1_Testes_ARID4B: |
| 1_Testes_ARID4B:             | -1230 upstream       | 1 | 23.000 | 1 | 1_Testes_ARID4B: |
| 1_Testes_ARID4B:             | -1495 upstream       | 1 | 23.000 | 1 | 1_Testes_ARID4B: |
| 1_Testes_ARID4B:             | 526 in gene          | 1 | 37.000 | 1 | 1_Testes_ARID4B: |
| 1_Testes_ARID4B:             | 192 in gene          | 1 | 31.000 | 1 | 1_Testes_ARID4B: |
| 1_Testes_ARID4B:             | 18267 downstream     | 1 | 31.000 | 1 | 1_Testes_ARID4B: |
| 1_Testes_ARID4B:             | 243 in gene          | 1 | 33.000 | 1 | 1_Testes_ARID4B: |
| 1_Testes_ARID4B:             | 183 in gene          | 1 | 29.000 | 1 | 1_Testes_ARID4B: |
| 1_Testes_ARID4B:             | 140 in gene          | 1 | 23.000 | 1 | 1_Testes_ARID4B: |
| 1_Testes_ARID4B:             | 35355 downstream     | 1 | 23.000 | 1 | 1_Testes_ARID4B: |
| 1_Testes_ARID4B:             | 8367 downstream      | 1 | 32.000 | 1 | 1_Testes_ARID4B: |
| 1_Testes_ARID4B:             | 8652 downstream      | 1 | 31.000 | 1 | 1_Testes_ARID4B: |
| 1_Testes_ARID4B:             | 117 in gene          | 1 | 31.000 | 1 | 1_Testes_ARID4B: |
| 1_Testes_ARID4B: 10963, -157 | downstream, upstream | 1 | 27.000 | 2 | 1_Testes_ARID4B: |
| 1_Testes_ARID4B:             | 44 in gene           | 1 | 23.000 | 1 | 1_Testes_ARID4B: |
| 1_Testes_ARID4B:             | 487 in gene          | 1 | 23.000 | 1 | 1_Testes_ARID4B: |
| 1_Testes_ARID4B:             | -60 upstream         | 1 | 33.000 | 1 | 1_Testes_ARID4B: |
| 1_Testes_ARID4B:             | 82 in gene           | 1 | 28.000 | 1 | 1_Testes_ARID4B: |
| 1_Testes_ARID4B:             | 86 in gene           | 1 | 20.000 | 1 | 1_Testes_ARID4B: |
| 1_Testes_ARID4B:             | 55 in gene           | 1 | 24.000 | 1 | 1_Testes_ARID4B: |
| 1_Testes_ARID4B:             | 136 in gene          | 1 | 26.000 | 1 | 1_Testes_ARID4B: |
| 1_Testes_ARID4B:             | -236 upstream        | 1 | 27.000 | 1 | 1_Testes_ARID4B: |
| 1_Testes_ARID4B:             | -892 upstream        | 1 | 27.000 | 1 | 1_Testes_ARID4B: |
| 1_Testes_ARID4B:             | 241 in gene          | 1 | 23.000 | 1 | 1_Testes_ARID4B: |
| 1_Testes_ARID4B:             | -752 upstream        | 1 | 23.000 | 1 | 1_Testes_ARID4B: |
| 1_Testes_ARID4B:             | 28426 downstream     | 1 | 44.000 | 1 | 1_Testes_ARID4B: |
| 1_Testes_ARID4B:             | 35 in gene           | 1 | 44.000 | 1 | 1_Testes_ARID4B: |
| 1_Testes_ARID4B:             | -174 upstream        | 1 | 44.000 | 1 | 1_Testes_ARID4B: |
| 1_Testes_ARID4B:             | -548 upstream        | 1 | 44.000 | 1 | 1_Testes_ARID4B: |
| 1_Testes_ARID4B:             | -1618 upstream       | 1 | 44.000 | 1 | 1_Testes_ARID4B: |
| 1_Testes_ARID4B: 45611, -309 | downstream, upstream | 1 | 34.000 | 2 | 1_Testes_ARID4B: |
| 1_Testes_ARID4B:             | 168 in gene          | 1 | 24.000 | 1 | 1_Testes_ARID4B: |
| 1_Testes_ARID4B:             | 32541 downstream     | 1 | 20.000 | 1 | 1_Testes_ARID4B: |
| 1_Testes_ARID4B:             | 174 in gene          | 1 | 20.000 | 1 | 1_Testes_ARID4B: |
| 1_Testes_ARID4B:             | 1210 in gene         | 1 | 25.000 | 1 | 1_Testes_ARID4B: |
| 1_Testes_ARID4B:             | 492 in gene          | 1 | 25.000 | 1 | 1_Testes_ARID4B: |
| 1_Testes_ARID4B:             | 674 in gene          | 1 | 27.000 | 1 | 1_Testes_ARID4B: |
| 1_Testes_ARID4B:             | 668 in gene          | 1 | 27.000 | 1 | 1_Testes_ARID4B: |
| 1_Testes_ARID4B:             | 73 in gene           | 1 | 16.000 | 1 | 1_Testes_ARID4B: |
| 1_Testes_ARID4B:             | -239 upstream        | 1 | 16.000 | 1 | 1_Testes_ARID4B: |
| 1_Testes_ARID4B:             | 263 in gene          | 1 | 19.000 | 1 | 1_Testes_ARID4B: |
| 1_Testes_ARID4B:             | -338 upstream        | 1 | 21.000 | 1 | 1_Testes_ARID4B: |
| 1_Testes_ARID4B:             | 981 in gene          | 1 | 24.000 | 1 | 1_Testes_ARID4B: |

|                                          |        |                         |   |        |   |                  |
|------------------------------------------|--------|-------------------------|---|--------|---|------------------|
| 1_Testes_ARID4B:                         | 13175  | downstream              | 1 | 36.000 | 1 | 1_Testes_ARID4B: |
| 1_Testes_ARID4B:                         | 162    | in gene                 | 1 | 36.000 | 1 | 1_Testes_ARID4B: |
| 1_Testes_ARID4B:                         | 29785  | downstream              | 1 | 28.000 | 1 | 1_Testes_ARID4B: |
| 1_Testes_ARID4B:53, 14565                |        | in gene, downstream     | 1 | 27.000 | 2 | 1_Testes_ARID4B: |
| 1_Testes_ARID4B:                         | 433    | in gene                 | 1 | 26.000 | 1 | 1_Testes_ARID4B: |
| 1_Testes_ARID4B:                         | -10601 | upstream                | 1 | 26.000 | 1 | 1_Testes_ARID4B: |
| 1_Testes_ARID4B:144, 9792                |        | in gene, downstream     | 1 | 28.500 | 2 | 1_Testes_ARID4B: |
| 1_Testes_ARID4B:-10284, -636             |        | upstream, upstream      | 1 | 28.500 | 2 | 1_Testes_ARID4B: |
| 1_Testes_ARID4B:                         | -73    | upstream                | 1 | 28.000 | 1 | 1_Testes_ARID4B: |
| 1_Testes_ARID4B:                         | 2203   | in gene                 | 1 | 28.000 | 1 | 1_Testes_ARID4B: |
| 1_Testes_ARID4B:                         | -3721  | upstream                | 1 | 28.000 | 1 | 1_Testes_ARID4B: |
| 1_Testes_ARID4B:                         | 1406   | in gene                 | 1 | 22.000 | 1 | 1_Testes_ARID4B: |
| 1_Testes_ARID4B:                         | -2783  | upstream                | 1 | 26.000 | 1 | 1_Testes_ARID4B: |
| 1_Testes_ARID4B:                         | 2670   | downstream              | 1 | 26.000 | 1 | 1_Testes_ARID4B: |
| 1_Testes_ARID4B:398, 14734               |        | in gene, downstream     | 1 | 22.000 | 2 | 1_Testes_ARID4B: |
| 1_Testes_ARID4B:                         | 223    | in gene                 | 1 | 18.000 | 1 | 1_Testes_ARID4B: |
| 1_Testes_ARID4B:28399, 815               |        | downstream, in gene     | 1 | 20.500 | 2 | 1_Testes_ARID4B: |
| 1_Testes_ARID4B:                         | -4622  | upstream                | 1 | 25.000 | 1 | 1_Testes_ARID4B: |
| 1_Testes_ARID4B:                         | 4177   | downstream              | 1 | 25.000 | 1 | 1_Testes_ARID4B: |
| 1_Testes_ARID4B:-1734, -11910            |        | upstream, upstream      | 1 | 28.000 | 2 | 1_Testes_ARID4B: |
| 1_Testes_ARID4B:13707, 3531              |        | in gene, in gene        | 1 | 28.000 | 2 | 1_Testes_ARID4B: |
| 1_Testes_ARID4B:                         | 138964 | downstream              | 1 | 31.000 | 1 | 1_Testes_ARID4B: |
| 1_Testes_ARID4B:                         | -115   | upstream                | 1 | 19.000 | 1 | 1_Testes_ARID4B: |
| 1_Testes_ARID4B:                         | 18972  | downstream              | 1 | 19.000 | 1 | 1_Testes_ARID4B: |
| 1_Testes_ARID4B:                         | 648    | in gene                 | 1 | 33.000 | 1 | 1_Testes_ARID4B: |
| 1_Testes_ARID4B:                         | 12593  | downstream              | 1 | 33.000 | 1 | 1_Testes_ARID4B: |
| 1_Testes_ARID4B:                         | 11219  | downstream              | 1 | 23.000 | 1 | 1_Testes_ARID4B: |
| 1_Testes_ARID4B:                         | 357    | in gene                 | 1 | 23.000 | 1 | 1_Testes_ARID4B: |
| 1_Testes_ARID4B:                         | 2191   | downstream              | 1 | 23.000 | 1 | 1_Testes_ARID4B: |
| 1_Testes_ARID4B:                         | -9262  | upstream                | 1 | 54.000 | 1 | 1_Testes_ARID4B: |
| 1_Testes_ARID4B:                         | 8861   | downstream              | 1 | 54.000 | 1 | 1_Testes_ARID4B: |
| 1_Testes_ARID4B:                         | -5842  | upstream                | 1 | 54.000 | 1 | 1_Testes_ARID4B: |
| 1_Testes_ARID4B:519, -9609               |        | in gene, upstream       | 1 | 41.000 | 2 | 1_Testes_ARID4B: |
| 1_Testes_ARID4B:10180, 52                |        | downstream, in gene     | 1 | 41.000 | 2 | 1_Testes_ARID4B: |
| 1_Testes_ARID4B:-10234, -106             |        | upstream, upstream      | 1 | 41.000 | 2 | 1_Testes_ARID4B: |
| 1_Testes_ARID4B:13650, 3522              |        | downstream, downstre    | 1 | 41.000 | 2 | 1_Testes_ARID4B: |
| 1_Testes_ARID4B:24194, 14066             |        | downstream, downstre    | 1 | 41.000 | 2 | 1_Testes_ARID4B: |
| 1_Testes_ARID4B:                         | 14066  | downstream              | 1 | 28.000 | 1 | 1_Testes_ARID4B: |
| 1_Testes_ARID4B:                         | -8321  | upstream                | 1 | 23.000 | 1 | 1_Testes_ARID4B: |
| 1_Testes_ARID4B:                         | -4700  | upstream                | 1 | 23.000 | 1 | 1_Testes_ARID4B: |
| 1_Testes_ARID4B:                         | 632    | in gene                 | 1 | 23.000 | 1 | 1_Testes_ARID4B: |
| 1_Testes_ARID4B:321, -4479, -5503, -668  |        | in gene, upstream, upsi | 1 | 20.400 | 5 | 1_Testes_ARID4B: |
| 1_Testes_ARID4B:6009, 1209, 185, -999,   |        | downstream, in gene, ii | 1 | 20.400 | 5 | 1_Testes_ARID4B: |
| 1_Testes_ARID4B:10008, 5208, 4184, 300   |        | downstream, downstre    | 1 | 20.400 | 5 | 1_Testes_ARID4B: |
| 1_Testes_ARID4B:-8053, -3253, -2229, -10 |        | upstream, upstream, up  | 1 | 20.400 | 5 | 1_Testes_ARID4B: |
| 1_Testes_ARID4B:                         | -7384  | upstream                | 1 | 21.000 | 1 | 1_Testes_ARID4B: |
| 1_Testes_ARID4B:                         | -3659  | upstream                | 1 | 21.000 | 1 | 1_Testes_ARID4B: |



|                                      |       |                        |   |        |   |                  |
|--------------------------------------|-------|------------------------|---|--------|---|------------------|
| 1_Testes_ARID4B:                     | 9025  | in gene                | 1 | 21.000 | 1 | 1_Testes_ARID4B: |
| 1_Testes_ARID4B:                     | -3230 | upstream               | 1 | 18.000 | 1 | 1_Testes_ARID4B: |
| 1_Testes_ARID4B:                     | -263  | upstream               | 1 | 18.000 | 1 | 1_Testes_ARID4B: |
| 1_Testes_ARID4B: 14291, -5261        |       | downstream, upstream   | 1 | 19.500 | 2 | 1_Testes_ARID4B: |
| 1_Testes_ARID4B:                     | 186   | in gene                | 1 | 21.000 | 1 | 1_Testes_ARID4B: |
| 1_Testes_ARID4B: -1078, 12330, 19274 |       | upstream, downstream   | 1 | 29.333 | 3 | 1_Testes_ARID4B: |
| 1_Testes_ARID4B: 16, 6960            |       | in gene, downstream    | 1 | 33.500 | 2 | 1_Testes_ARID4B: |
| 1_Testes_ARID4B: 7750, 806           |       | downstream, in gene    | 1 | 33.500 | 2 | 1_Testes_ARID4B: |
| 1_Testes_ARID4B:                     | -61   | upstream               | 1 | 22.000 | 1 | 1_Testes_ARID4B: |
| 1_Testes_ARID4B: 128, 14736, 19600   |       | in gene, downstream, c | 1 | 25.333 | 3 | 1_Testes_ARID4B: |
| 1_Testes_ARID4B: -10074, 4534, 9398  |       | upstream, downstream   | 1 | 25.333 | 3 | 1_Testes_ARID4B: |
| 1_Testes_ARID4B: 133, 4997           |       | in gene, downstream    | 1 | 27.000 | 2 | 1_Testes_ARID4B: |
| 1_Testes_ARID4B: -4722, 142          |       | upstream, in gene      | 1 | 27.000 | 2 | 1_Testes_ARID4B: |
| 1_Testes_ARID4B:                     | 14639 | downstream             | 1 | 30.000 | 1 | 1_Testes_ARID4B: |
| 1_Testes_ARID4B:                     | 5034  | downstream             | 1 | 17.000 | 1 | 1_Testes_ARID4B: |
| 1_Testes_ARID4B:                     | 2050  | in gene                | 1 | 17.000 | 1 | 1_Testes_ARID4B: |
| 1_Testes_ARID4B: 10854, -9754        |       | downstream, upstream   | 1 | 19.500 | 2 | 1_Testes_ARID4B: |
| 1_Testes_ARID4B:                     | 4835  | downstream             | 1 | 22.000 | 1 | 1_Testes_ARID4B: |
| 1_Testes_ARID4B:                     | 4510  | downstream             | 1 | 22.000 | 1 | 1_Testes_ARID4B: |
| 1_Testes_ARID4B:                     | -1638 | upstream               | 1 | 22.000 | 1 | 1_Testes_ARID4B: |
| 1_Testes_ARID4B:                     | 300   | in gene                | 1 | 22.000 | 1 | 1_Testes_ARID4B: |
| 1_Testes_ARID4B:                     | 15789 | downstream             | 1 | 22.000 | 1 | 1_Testes_ARID4B: |
| 1_Testes_ARID4B:                     | -145  | upstream               | 1 | 24.000 | 1 | 1_Testes_ARID4B: |
| 1_Testes_ARID4B:                     | 83    | in gene                | 1 | 29.000 | 1 | 1_Testes_ARID4B: |
| 1_Testes_ARID4B:                     | 14982 | downstream             | 1 | 25.000 | 1 | 1_Testes_ARID4B: |
| 1_Testes_ARID4B:                     | -5640 | upstream               | 1 | 25.000 | 1 | 1_Testes_ARID4B: |
| 1_Testes_ARID4B:                     | 1047  | in gene                | 1 | 25.000 | 1 | 1_Testes_ARID4B: |
| 1_Testes_ARID4B:                     | -5101 | upstream               | 1 | 25.000 | 1 | 1_Testes_ARID4B: |
| 1_Testes_ARID4B:                     | 22908 | downstream             | 1 | 29.000 | 1 | 1_Testes_ARID4B: |
| 1_Testes_ARID4B:                     | 191   | in gene                | 1 | 29.000 | 1 | 1_Testes_ARID4B: |
| 1_Testes_ARID4B:                     | 7726  | downstream             | 1 | 24.000 | 1 | 1_Testes_ARID4B: |
| 1_Testes_ARID4B: 191, -7169          |       | in gene, upstream      | 1 | 36.000 | 2 | 1_Testes_ARID4B: |
| 1_Testes_ARID4B: -741, 6619          |       | upstream, downstream   | 1 | 36.000 | 2 | 1_Testes_ARID4B: |
| 1_Testes_ARID4B: 7802, 442           |       | downstream, in gene    | 1 | 36.000 | 2 | 1_Testes_ARID4B: |
| 1_Testes_ARID4B:                     | -3005 | upstream               | 1 | 48.000 | 1 | 1_Testes_ARID4B: |
| 1_Testes_ARID4B:                     | 15208 | downstream             | 1 | 48.000 | 1 | 1_Testes_ARID4B: |
| 1_Testes_ARID4B:                     | 233   | in gene                | 1 | 22.000 | 1 | 1_Testes_ARID4B: |
| 1_Testes_ARID4B: 12283, -581         |       | downstream, upstream   | 1 | 20.500 | 2 | 1_Testes_ARID4B: |
| 1_Testes_ARID4B:                     | 188   | in gene                | 1 | 19.000 | 1 | 1_Testes_ARID4B: |
| 1_Testes_ARID4B:                     | 33    | in gene                | 1 | 26.000 | 1 | 1_Testes_ARID4B: |
| 1_Testes_ARID4B:                     | 101   | in gene                | 1 | 25.000 | 1 | 1_Testes_ARID4B: |
| 1_Testes_ARID4B:                     | 213   | in gene                | 1 | 23.000 | 1 | 1_Testes_ARID4B: |
| 1_Testes_ARID4B: -440, 12760         |       | upstream, downstream   | 1 | 33.000 | 2 | 1_Testes_ARID4B: |
| 1_Testes_ARID4B: 13266, 66           |       | downstream, in gene    | 1 | 33.000 | 2 | 1_Testes_ARID4B: |
| 1_Testes_ARID4B: 21472, 192          |       | downstream, in gene    | 1 | 35.000 | 2 | 1_Testes_ARID4B: |
| 1_Testes_ARID4B:                     | 15023 | downstream             | 1 | 27.000 | 1 | 1_Testes_ARID4B: |
| 1_Testes_ARID4B:                     | -4021 | upstream               | 1 | 26.000 | 1 | 1_Testes_ARID4B: |

|                                     |                          |   |        |   |                  |
|-------------------------------------|--------------------------|---|--------|---|------------------|
| 1_Testes_ARID4B:                    | -162 upstream            | 1 | 26.000 | 1 | 1_Testes_ARID4B: |
| 1_Testes_ARID4B:                    | 8200 downstream          | 1 | 26.000 | 1 | 1_Testes_ARID4B: |
| 1_Testes_ARID4B:                    | -7746 upstream           | 1 | 26.000 | 1 | 1_Testes_ARID4B: |
| 1_Testes_ARID4B:                    | 225 in gene              | 1 | 48.000 | 1 | 1_Testes_ARID4B: |
| 1_Testes_ARID4B:                    | 5882 downstream          | 1 | 31.000 | 1 | 1_Testes_ARID4B: |
| 1_Testes_ARID4B:                    | 30 in gene               | 1 | 31.000 | 1 | 1_Testes_ARID4B: |
| 1_Testes_ARID4B:48496, 448          | downstream, in gene      | 1 | 25.000 | 2 | 1_Testes_ARID4B: |
| 1_Testes_ARID4B:                    | 60790 downstream         | 1 | 19.000 | 1 | 1_Testes_ARID4B: |
| 1_Testes_ARID4B:                    | 323 in gene              | 1 | 42.000 | 1 | 1_Testes_ARID4B: |
| 1_Testes_ARID4B:                    | -641 upstream            | 1 | 33.000 | 1 | 1_Testes_ARID4B: |
| 1_Testes_ARID4B:                    | 254 in gene              | 1 | 33.000 | 1 | 1_Testes_ARID4B: |
| 1_Testes_ARID4B:                    | 175 in gene              | 1 | 21.000 | 1 | 1_Testes_ARID4B: |
| 1_Testes_ARID4B:                    | 20279 downstream         | 1 | 21.000 | 1 | 1_Testes_ARID4B: |
| 1_Testes_ARID4B:416, 29024          | in gene, downstream      | 1 | 24.000 | 2 | 1_Testes_ARID4B: |
| 1_Testes_ARID4B:                    | 165 in gene              | 1 | 27.000 | 1 | 1_Testes_ARID4B: |
| 1_Testes_ARID4B:                    | 47517 in gene            | 1 | 40.000 | 1 | 1_Testes_ARID4B: |
| 1_Testes_ARID4B:                    | 182 in gene              | 1 | 40.000 | 1 | 1_Testes_ARID4B: |
| 1_Testes_ARID4B:                    | 16270 downstream         | 1 | 26.000 | 1 | 1_Testes_ARID4B: |
| 1_Testes_ARID4B:                    | 242 in gene              | 1 | 26.000 | 1 | 1_Testes_ARID4B: |
| 1_Testes_ARID4B:                    | -283 upstream            | 1 | 26.000 | 1 | 1_Testes_ARID4B: |
| 1_Testes_ARID4B:                    | 22219 downstream         | 1 | 26.000 | 1 | 1_Testes_ARID4B: |
| 1_Testes_ARID4B:18891, 29899        | in gene, downstream      | 1 | 33.500 | 2 | 1_Testes_ARID4B: |
| 1_Testes_ARID4B:                    | 9 in gene                | 1 | 44.000 | 1 | 1_Testes_ARID4B: |
| 1_Testes_ARID4B:                    | 224 in gene              | 1 | 24.000 | 1 | 1_Testes_ARID4B: |
| 1_Testes_ARID4B:1076, 6820, 12212   | in gene, in gene, in gen | 1 | 24.667 | 3 | 1_Testes_ARID4B: |
| 1_Testes_ARID4B:53944, 360, -1128   | downstream, in gene, u   | 1 | 30.667 | 3 | 1_Testes_ARID4B: |
| 1_Testes_ARID4B:-1360, 128          | upstream, in gene        | 1 | 38.000 | 2 | 1_Testes_ARID4B: |
| 1_Testes_ARID4B:-8726, -7238        | upstream, upstream       | 1 | 38.000 | 2 | 1_Testes_ARID4B: |
| 1_Testes_ARID4B:29078, 27590, -410  | downstream, downstre     | 1 | 34.333 | 3 | 1_Testes_ARID4B: |
| 1_Testes_ARID4B:336, 240880, 247648 | in gene, downstream, c   | 1 | 32.000 | 3 | 1_Testes_ARID4B: |
| 1_Testes_ARID4B:3503, -3265         | in gene, upstream        | 1 | 34.500 | 2 | 1_Testes_ARID4B: |
| 1_Testes_ARID4B:-6636, 132          | upstream, downstream     | 1 | 34.500 | 2 | 1_Testes_ARID4B: |
| 1_Testes_ARID4B:-6930, -162         | upstream, upstream       | 1 | 34.500 | 2 | 1_Testes_ARID4B: |
| 1_Testes_ARID4B:12056, 5288         | downstream, downstre     | 1 | 34.500 | 2 | 1_Testes_ARID4B: |
| 1_Testes_ARID4B:23731, 16963, -3501 | downstream, downstre     | 1 | 35.000 | 3 | 1_Testes_ARID4B: |
| 1_Testes_ARID4B:                    | -9 upstream              | 1 | 36.000 | 1 | 1_Testes_ARID4B: |
| 1_Testes_ARID4B:                    | -44 upstream             | 1 | 24.000 | 1 | 1_Testes_ARID4B: |
| 1_Testes_ARID4B:                    | -6 upstream              | 1 | 24.000 | 1 | 1_Testes_ARID4B: |
| 1_Testes_ARID4B:397, -6963          | in gene, upstream        | 1 | 25.500 | 2 | 1_Testes_ARID4B: |
| 1_Testes_ARID4B:-7219, 141          | upstream, in gene        | 1 | 25.500 | 2 | 1_Testes_ARID4B: |
| 1_Testes_ARID4B:-9396, -2036        | upstream, upstream       | 1 | 25.500 | 2 | 1_Testes_ARID4B: |
| 1_Testes_ARID4B:                    | -6399 upstream           | 1 | 28.000 | 1 | 1_Testes_ARID4B: |
| 1_Testes_ARID4B:                    | 23687 downstream         | 1 | 20.000 | 1 | 1_Testes_ARID4B: |
| 1_Testes_ARID4B:                    | 370 in gene              | 1 | 20.000 | 1 | 1_Testes_ARID4B: |
| 1_Testes_ARID4B:-3077, 18379        | upstream, downstream     | 1 | 27.500 | 2 | 1_Testes_ARID4B: |
| 1_Testes_ARID4B:                    | 226 in gene              | 1 | 35.000 | 1 | 1_Testes_ARID4B: |
| 1_Testes_ARID4B:                    | 132 in gene              | 1 | 35.000 | 1 | 1_Testes_ARID4B: |

|                                    |       |                          |   |        |   |                  |
|------------------------------------|-------|--------------------------|---|--------|---|------------------|
| 1_Testes_ARID4B:                   | 27947 | downstream               | 1 | 25.000 | 1 | 1_Testes_ARID4B: |
| 1_Testes_ARID4B:                   | 146   | in gene                  | 1 | 25.000 | 1 | 1_Testes_ARID4B: |
| 1_Testes_ARID4B:                   | 265   | in gene                  | 1 | 28.000 | 1 | 1_Testes_ARID4B: |
| 1_Testes_ARID4B:                   | 1049  | in gene                  | 1 | 25.000 | 1 | 1_Testes_ARID4B: |
| 1_Testes_ARID4B:                   | 198   | in gene                  | 1 | 26.000 | 1 | 1_Testes_ARID4B: |
| 1_Testes_ARID4B: 184, 15192        |       | in gene, downstream      | 1 | 24.000 | 2 | 1_Testes_ARID4B: |
| 1_Testes_ARID4B: 15332, 324        |       | downstream, in gene      | 1 | 24.000 | 2 | 1_Testes_ARID4B: |
| 1_Testes_ARID4B:                   | -365  | upstream                 | 1 | 22.000 | 1 | 1_Testes_ARID4B: |
| 1_Testes_ARID4B:                   | 26451 | downstream               | 1 | 22.000 | 1 | 1_Testes_ARID4B: |
| 1_Testes_ARID4B:                   | 549   | in gene                  | 1 | 36.000 | 1 | 1_Testes_ARID4B: |
| 1_Testes_ARID4B:                   | -8575 | upstream                 | 1 | 36.000 | 1 | 1_Testes_ARID4B: |
| 1_Testes_ARID4B: 82431, 6639, -33  |       | in gene, in gene, upstre | 1 | 19.667 | 3 | 1_Testes_ARID4B: |
| 1_Testes_ARID4B:                   | 640   | in gene                  | 1 | 34.000 | 1 | 1_Testes_ARID4B: |
| 1_Testes_ARID4B:                   | -72   | upstream                 | 1 | 23.000 | 1 | 1_Testes_ARID4B: |
| 1_Testes_ARID4B: -297, 245991      |       | upstream, downstream     | 1 | 24.000 | 2 | 1_Testes_ARID4B: |
| 1_Testes_ARID4B:                   | -1497 | upstream                 | 1 | 23.000 | 1 | 1_Testes_ARID4B: |
| 1_Testes_ARID4B: 27262, -4242      |       | downstream, upstream     | 1 | 26.500 | 2 | 1_Testes_ARID4B: |
| 1_Testes_ARID4B: 508, 13319, 19660 |       | in gene, in gene, downs  | 1 | 21.667 | 3 | 1_Testes_ARID4B: |
| 1_Testes_ARID4B: 6542, 201         |       | downstream, in gene      | 1 | 17.500 | 2 | 1_Testes_ARID4B: |
| 1_Testes_ARID4B: -8386, -2045      |       | upstream, upstream       | 1 | 17.500 | 2 | 1_Testes_ARID4B: |
| 1_Testes_ARID4B: 12467, 6126       |       | downstream, downstre     | 1 | 17.500 | 2 | 1_Testes_ARID4B: |
| 1_Testes_ARID4B:                   | 37    | in gene                  | 1 | 30.000 | 1 | 1_Testes_ARID4B: |
| 1_Testes_ARID4B:                   | 53153 | downstream               | 1 | 32.000 | 1 | 1_Testes_ARID4B: |
| 1_Testes_ARID4B: 1280, 49584       |       | in gene, downstream      | 1 | 29.000 | 2 | 1_Testes_ARID4B: |
| 1_Testes_ARID4B:                   | 265   | in gene                  | 1 | 26.000 | 1 | 1_Testes_ARID4B: |
| 1_Testes_ARID4B:                   | 87    | in gene                  | 1 | 26.000 | 1 | 1_Testes_ARID4B: |
| 1_Testes_ARID4B:                   | -5541 | upstream                 | 1 | 26.000 | 1 | 1_Testes_ARID4B: |
| 1_Testes_ARID4B:                   | 70607 | downstream               | 1 | 41.000 | 1 | 1_Testes_ARID4B: |
| 1_Testes_ARID4B:                   | 270   | in gene                  | 1 | 41.000 | 1 | 1_Testes_ARID4B: |
| 1_Testes_ARID4B: 11386, -2198      |       | downstream, upstream     | 1 | 37.500 | 2 | 1_Testes_ARID4B: |
| 1_Testes_ARID4B: 98, 9906          |       | in gene, downstream      | 1 | 31.500 | 2 | 1_Testes_ARID4B: |
| 1_Testes_ARID4B: 4720, -5088       |       | downstream, upstream     | 1 | 31.500 | 2 | 1_Testes_ARID4B: |
| 1_Testes_ARID4B: 2482, -7326       |       | downstream, upstream     | 1 | 31.500 | 2 | 1_Testes_ARID4B: |
| 1_Testes_ARID4B: 2892, -6916       |       | downstream, upstream     | 1 | 31.500 | 2 | 1_Testes_ARID4B: |
| 1_Testes_ARID4B: 4249, -5559       |       | downstream, upstream     | 1 | 31.500 | 2 | 1_Testes_ARID4B: |
| 1_Testes_ARID4B: -9563, 245        |       | upstream, in gene        | 1 | 31.500 | 2 | 1_Testes_ARID4B: |
| 1_Testes_ARID4B:                   | -4720 | upstream                 | 1 | 29.000 | 1 | 1_Testes_ARID4B: |
| 1_Testes_ARID4B:                   | 71    | in gene                  | 1 | 25.000 | 1 | 1_Testes_ARID4B: |
| 1_Testes_ARID4B: -114, 16430       |       | upstream, downstream     | 1 | 25.500 | 2 | 1_Testes_ARID4B: |
| 1_Testes_ARID4B:                   | 422   | in gene                  | 1 | 26.000 | 1 | 1_Testes_ARID4B: |
| 1_Testes_ARID4B:                   | 26953 | downstream               | 1 | 18.000 | 1 | 1_Testes_ARID4B: |
| 1_Testes_ARID4B:                   | 4346  | downstream               | 1 | 18.000 | 1 | 1_Testes_ARID4B: |
| 1_Testes_ARID4B: 122, 15215        |       | in gene, downstream      | 1 | 23.500 | 2 | 1_Testes_ARID4B: |
| 1_Testes_ARID4B:                   | 115   | in gene                  | 1 | 29.000 | 1 | 1_Testes_ARID4B: |
| 1_Testes_ARID4B:                   | 155   | in gene                  | 1 | 25.000 | 1 | 1_Testes_ARID4B: |
| 1_Testes_ARID4B:                   | 31898 | downstream               | 1 | 25.000 | 1 | 1_Testes_ARID4B: |
| 1_Testes_ARID4B:                   | 13296 | downstream               | 1 | 29.000 | 1 | 1_Testes_ARID4B: |

|                                          |                         |   |        |   |                  |
|------------------------------------------|-------------------------|---|--------|---|------------------|
| 1_Testes_ARID4B:                         | 8903 downstream         | 1 | 29.000 | 1 | 1_Testes_ARID4B: |
| 1_Testes_ARID4B:                         | -248 upstream           | 1 | 29.000 | 1 | 1_Testes_ARID4B: |
| 1_Testes_ARID4B:                         | 120 in gene             | 1 | 29.000 | 1 | 1_Testes_ARID4B: |
| 1_Testes_ARID4B:                         | 23844 downstream        | 1 | 29.000 | 1 | 1_Testes_ARID4B: |
| 1_Testes_ARID4B:                         | -14 upstream            | 1 | 26.000 | 1 | 1_Testes_ARID4B: |
| 1_Testes_ARID4B:                         | 615 in gene             | 1 | 25.000 | 1 | 1_Testes_ARID4B: |
| 1_Testes_ARID4B:                         | -500 upstream           | 1 | 22.000 | 1 | 1_Testes_ARID4B: |
| 1_Testes_ARID4B: 69540, 113044           | in gene, downstream     | 1 | 22.500 | 2 | 1_Testes_ARID4B: |
| 1_Testes_ARID4B:                         | 14334 downstream        | 1 | 18.000 | 1 | 1_Testes_ARID4B: |
| 1_Testes_ARID4B: -7713, -353             | upstream, upstream      | 1 | 30.500 | 2 | 1_Testes_ARID4B: |
| 1_Testes_ARID4B: 219, -8645              | in gene, upstream       | 1 | 23.000 | 2 | 1_Testes_ARID4B: |
| 1_Testes_ARID4B: -8664, 200              | upstream, in gene       | 1 | 23.000 | 2 | 1_Testes_ARID4B: |
| 1_Testes_ARID4B:                         | 25312 downstream        | 1 | 37.000 | 1 | 1_Testes_ARID4B: |
| 1_Testes_ARID4B:                         | 129 in gene             | 1 | 37.000 | 1 | 1_Testes_ARID4B: |
| 1_Testes_ARID4B:                         | 176 in gene             | 1 | 23.000 | 1 | 1_Testes_ARID4B: |
| 1_Testes_ARID4B:                         | -5473 upstream          | 1 | 18.000 | 1 | 1_Testes_ARID4B: |
| 1_Testes_ARID4B:                         | 209 in gene             | 1 | 18.000 | 1 | 1_Testes_ARID4B: |
| 1_Testes_ARID4B: 377, 48633              | in gene, downstream     | 1 | 28.000 | 2 | 1_Testes_ARID4B: |
| 1_Testes_ARID4B:                         | 202 in gene             | 1 | 30.000 | 1 | 1_Testes_ARID4B: |
| 1_Testes_ARID4B: 302777, 233             | downstream, in gene     | 1 | 24.500 | 2 | 1_Testes_ARID4B: |
| 1_Testes_ARID4B:                         | -494 upstream           | 1 | 31.000 | 1 | 1_Testes_ARID4B: |
| 1_Testes_ARID4B:                         | 401 in gene             | 1 | 31.000 | 1 | 1_Testes_ARID4B: |
| 1_Testes_ARID4B:                         | 16143 downstream        | 1 | 25.000 | 1 | 1_Testes_ARID4B: |
| 1_Testes_ARID4B:                         | 107 in gene             | 1 | 25.000 | 1 | 1_Testes_ARID4B: |
| 1_Testes_ARID4B: -2965, 20491            | upstream, in gene       | 1 | 21.000 | 2 | 1_Testes_ARID4B: |
| 1_Testes_ARID4B:                         | 11053 downstream        | 1 | 17.000 | 1 | 1_Testes_ARID4B: |
| 1_Testes_ARID4B:                         | 9322 downstream         | 1 | 17.000 | 1 | 1_Testes_ARID4B: |
| 1_Testes_ARID4B:                         | 8448 downstream         | 1 | 17.000 | 1 | 1_Testes_ARID4B: |
| 1_Testes_ARID4B:                         | -3775 upstream          | 1 | 17.000 | 1 | 1_Testes_ARID4B: |
| 1_Testes_ARID4B:                         | 55 in gene              | 1 | 17.000 | 1 | 1_Testes_ARID4B: |
| 1_Testes_ARID4B:                         | -9365 upstream          | 1 | 33.000 | 1 | 1_Testes_ARID4B: |
| 1_Testes_ARID4B:                         | 123 in gene             | 1 | 33.000 | 1 | 1_Testes_ARID4B: |
| 1_Testes_ARID4B:                         | -298 upstream           | 1 | 33.000 | 1 | 1_Testes_ARID4B: |
| 1_Testes_ARID4B: 41858, 818, -270, -934  | downstream, in gene, u  | 1 | 34.250 | 4 | 1_Testes_ARID4B: |
| 1_Testes_ARID4B: 10365, 9277, 205        | downstream, downstre    | 1 | 34.667 | 3 | 1_Testes_ARID4B: |
| 1_Testes_ARID4B: -10300, -9212, -140, 36 | upstream, upstream, u   | 1 | 34.000 | 4 | 1_Testes_ARID4B: |
| 1_Testes_ARID4B:                         | 132 in gene             | 1 | 32.000 | 1 | 1_Testes_ARID4B: |
| 1_Testes_ARID4B:                         | 400 in gene             | 1 | 31.000 | 1 | 1_Testes_ARID4B: |
| 1_Testes_ARID4B:                         | -446 upstream           | 1 | 31.000 | 1 | 1_Testes_ARID4B: |
| 1_Testes_ARID4B:                         | 202 in gene             | 1 | 21.000 | 1 | 1_Testes_ARID4B: |
| 1_Testes_ARID4B: 476980, 481604          | downstream, downstre    | 1 | 22.000 | 2 | 1_Testes_ARID4B: |
| 1_Testes_ARID4B: 2244, -2380, -5756, -83 | in gene, upstream, upsi | 1 | 28.250 | 4 | 1_Testes_ARID4B: |
| 1_Testes_ARID4B: -2471, 2153, 5529, 808  | upstream, in gene, in g | 1 | 28.250 | 4 | 1_Testes_ARID4B: |
| 1_Testes_ARID4B:                         | 137 in gene             | 1 | 20.000 | 1 | 1_Testes_ARID4B: |
| 1_Testes_ARID4B: 56512, 64               | downstream, in gene     | 1 | 21.500 | 2 | 1_Testes_ARID4B: |
| 1_Testes_ARID4B: 100021, -555            | downstream, upstream    | 1 | 24.000 | 2 | 1_Testes_ARID4B: |
| 1_Testes_ARID4B:                         | 103 in gene             | 1 | 28.000 | 1 | 1_Testes_ARID4B: |

|                              |                      |   |        |   |                  |
|------------------------------|----------------------|---|--------|---|------------------|
| 1_Testes_ARID4B:             | -287 upstream        | 1 | 28.000 | 1 | 1_Testes_ARID4B: |
| 1_Testes_ARID4B:             | 84 in gene           | 1 | 25.000 | 1 | 1_Testes_ARID4B: |
| 1_Testes_ARID4B:             | 290 in gene          | 1 | 36.000 | 1 | 1_Testes_ARID4B: |
| 1_Testes_ARID4B:             | 233 in gene          | 1 | 25.000 | 1 | 1_Testes_ARID4B: |
| 1_Testes_ARID4B: 22170, -982 | downstream, upstream | 1 | 24.000 | 2 | 1_Testes_ARID4B: |
| 1_Testes_ARID4B: 435, 18099  | in gene, downstream  | 1 | 27.000 | 2 | 1_Testes_ARID4B: |
| 1_Testes_ARID4B:             | -3308 upstream       | 1 | 23.000 | 1 | 1_Testes_ARID4B: |
| 1_Testes_ARID4B:             | 283 in gene          | 1 | 31.000 | 1 | 1_Testes_ARID4B: |
| 1_Testes_ARID4B:             | 210 in gene          | 1 | 23.000 | 1 | 1_Testes_ARID4B: |
| 1_Testes_ARID4B:             | 11018 in gene        | 1 | 32.000 | 1 | 1_Testes_ARID4B: |
| 1_Testes_ARID4B:             | -727 upstream        | 1 | 42.000 | 1 | 1_Testes_ARID4B: |
| 1_Testes_ARID4B:             | 617 in gene          | 1 | 42.000 | 1 | 1_Testes_ARID4B: |
| 1_Testes_ARID4B:             | 587 in gene          | 1 | 21.000 | 1 | 1_Testes_ARID4B: |
| 1_Testes_ARID4B:             | 1494 in gene         | 1 | 21.000 | 1 | 1_Testes_ARID4B: |
| 1_Testes_ARID4B: 406, 105302 | in gene, downstream  | 1 | 23.000 | 2 | 1_Testes_ARID4B: |
| 1_Testes_ARID4B:             | 30 in gene           | 1 | 25.000 | 1 | 1_Testes_ARID4B: |
| 1_Testes_ARID4B:             | -325 upstream        | 1 | 26.000 | 1 | 1_Testes_ARID4B: |
| 1_Testes_ARID4B:             | -51 upstream         | 1 | 26.000 | 1 | 1_Testes_ARID4B: |
| 1_Testes_ARID4B:             | 234 in gene          | 1 | 31.000 | 1 | 1_Testes_ARID4B: |
| 1_Testes_ARID4B:             | 25745 downstream     | 1 | 30.000 | 1 | 1_Testes_ARID4B: |
| 1_Testes_ARID4B:             | 277 in gene          | 1 | 30.000 | 1 | 1_Testes_ARID4B: |
| 1_Testes_ARID4B:             | 316 in gene          | 1 | 32.000 | 1 | 1_Testes_ARID4B: |
| 1_Testes_ARID4B:             | 23 in gene           | 1 | 32.000 | 1 | 1_Testes_ARID4B: |
| 1_Testes_ARID4B:             | 479 in gene          | 1 | 16.000 | 1 | 1_Testes_ARID4B: |
| 1_Testes_ARID4B:             | -196 upstream        | 1 | 25.000 | 1 | 1_Testes_ARID4B: |
| 1_Testes_ARID4B:             | 120 in gene          | 1 | 25.000 | 1 | 1_Testes_ARID4B: |
| 1_Testes_ARID4B:             | 49297 downstream     | 1 | 25.000 | 1 | 1_Testes_ARID4B: |
| 1_Testes_ARID4B:             | 374 in gene          | 1 | 41.000 | 1 | 1_Testes_ARID4B: |
| 1_Testes_ARID4B: -827, 69669 | upstream, downstream | 1 | 32.000 | 2 | 1_Testes_ARID4B: |
| 1_Testes_ARID4B:             | 119 in gene          | 1 | 23.000 | 1 | 1_Testes_ARID4B: |
| 1_Testes_ARID4B:             | 12633 downstream     | 1 | 23.000 | 1 | 1_Testes_ARID4B: |
| 1_Testes_ARID4B:             | 421 in gene          | 1 | 32.000 | 1 | 1_Testes_ARID4B: |
| 1_Testes_ARID4B:             | 34 in gene           | 1 | 32.000 | 1 | 1_Testes_ARID4B: |
| 1_Testes_ARID4B:             | 3755 in gene         | 1 | 17.000 | 1 | 1_Testes_ARID4B: |
| 1_Testes_ARID4B: 215, -6505  | in gene, upstream    | 1 | 23.000 | 2 | 1_Testes_ARID4B: |
| 1_Testes_ARID4B: -6305, 415  | upstream, in gene    | 1 | 23.000 | 2 | 1_Testes_ARID4B: |
| 1_Testes_ARID4B:             | 662 in gene          | 1 | 19.000 | 1 | 1_Testes_ARID4B: |
| 1_Testes_ARID4B:             | 11774 downstream     | 1 | 19.000 | 1 | 1_Testes_ARID4B: |
| 1_Testes_ARID4B:             | 3382 in gene         | 1 | 17.000 | 1 | 1_Testes_ARID4B: |
| 1_Testes_ARID4B:             | 24910 downstream     | 1 | 17.000 | 1 | 1_Testes_ARID4B: |
| 1_Testes_ARID4B:             | 151 in gene          | 1 | 38.000 | 1 | 1_Testes_ARID4B: |
| 1_Testes_ARID4B:             | 52730 downstream     | 1 | 38.000 | 1 | 1_Testes_ARID4B: |
| 1_Testes_ARID4B:             | 128 in gene          | 1 | 41.000 | 1 | 1_Testes_ARID4B: |
| 1_Testes_ARID4B:             | 437 in gene          | 1 | 19.000 | 1 | 1_Testes_ARID4B: |
| 1_Testes_ARID4B: 596, 18596  | in gene, downstream  | 1 | 32.500 | 2 | 1_Testes_ARID4B: |
| 1_Testes_ARID4B:             | -71 upstream         | 1 | 18.000 | 1 | 1_Testes_ARID4B: |
| 1_Testes_ARID4B:             | -2329 upstream       | 1 | 25.000 | 1 | 1_Testes_ARID4B: |

|                                     |                        |   |        |   |                  |
|-------------------------------------|------------------------|---|--------|---|------------------|
| 1_Testes_ARID4B:                    | 901 in gene            | 1 | 21.000 | 1 | 1_Testes_ARID4B: |
| 1_Testes_ARID4B: 9458, 258          | in gene, in gene       | 1 | 23.000 | 2 | 1_Testes_ARID4B: |
| 1_Testes_ARID4B:                    | -846 upstream          | 1 | 20.000 | 1 | 1_Testes_ARID4B: |
| 1_Testes_ARID4B:                    | -9986 upstream         | 1 | 20.000 | 1 | 1_Testes_ARID4B: |
| 1_Testes_ARID4B: -212, 6732         | upstream, in gene      | 1 | 22.500 | 2 | 1_Testes_ARID4B: |
| 1_Testes_ARID4B: 18188, 11244       | downstream, in gene    | 1 | 22.500 | 2 | 1_Testes_ARID4B: |
| 1_Testes_ARID4B:                    | 84 in gene             | 1 | 24.000 | 1 | 1_Testes_ARID4B: |
| 1_Testes_ARID4B:                    | 10414 downstream       | 1 | 24.000 | 1 | 1_Testes_ARID4B: |
| 1_Testes_ARID4B:                    | 20 in gene             | 1 | 27.000 | 1 | 1_Testes_ARID4B: |
| 1_Testes_ARID4B:                    | 5151 downstream        | 1 | 21.000 | 1 | 1_Testes_ARID4B: |
| 1_Testes_ARID4B:                    | 410 in gene            | 1 | 21.000 | 1 | 1_Testes_ARID4B: |
| 1_Testes_ARID4B: 22730, 30202       | in gene, downstream    | 1 | 21.500 | 2 | 1_Testes_ARID4B: |
| 1_Testes_ARID4B: -5776, 1696        | upstream, in gene      | 1 | 21.500 | 2 | 1_Testes_ARID4B: |
| 1_Testes_ARID4B: 6208, 208          | in gene, in gene       | 1 | 24.500 | 2 | 1_Testes_ARID4B: |
| 1_Testes_ARID4B:                    | 172 in gene            | 1 | 21.000 | 1 | 1_Testes_ARID4B: |
| 1_Testes_ARID4B:                    | -345 upstream          | 1 | 21.000 | 1 | 1_Testes_ARID4B: |
| 1_Testes_ARID4B:                    | 289 in gene            | 1 | 30.000 | 1 | 1_Testes_ARID4B: |
| 1_Testes_ARID4B:                    | 6301 downstream        | 1 | 30.000 | 1 | 1_Testes_ARID4B: |
| 1_Testes_ARID4B:                    | 520 in gene            | 1 | 25.000 | 1 | 1_Testes_ARID4B: |
| 1_Testes_ARID4B:                    | 8687 in gene           | 1 | 23.000 | 1 | 1_Testes_ARID4B: |
| 1_Testes_ARID4B:                    | -7696 upstream         | 1 | 23.000 | 1 | 1_Testes_ARID4B: |
| 1_Testes_ARID4B:                    | -960 upstream          | 1 | 37.000 | 1 | 1_Testes_ARID4B: |
| 1_Testes_ARID4B: 37220, -12         | downstream, upstream   | 1 | 34.500 | 2 | 1_Testes_ARID4B: |
| 1_Testes_ARID4B:                    | 288 in gene            | 1 | 28.000 | 1 | 1_Testes_ARID4B: |
| 1_Testes_ARID4B: 489, 42169         | in gene, downstream    | 1 | 30.000 | 2 | 1_Testes_ARID4B: |
| 1_Testes_ARID4B:                    | 1915 in gene           | 1 | 18.000 | 1 | 1_Testes_ARID4B: |
| 1_Testes_ARID4B:                    | 30385 downstream       | 1 | 20.000 | 1 | 1_Testes_ARID4B: |
| 1_Testes_ARID4B:                    | 820 in gene            | 1 | 20.000 | 1 | 1_Testes_ARID4B: |
| 1_Testes_ARID4B:                    | 22284 downstream       | 1 | 24.000 | 1 | 1_Testes_ARID4B: |
| 1_Testes_ARID4B: -256, 13152        | upstream, downstream   | 1 | 22.500 | 2 | 1_Testes_ARID4B: |
| 1_Testes_ARID4B: 14801, 1393, -2319 | downstream, in gene, u | 1 | 23.667 | 3 | 1_Testes_ARID4B: |
| 1_Testes_ARID4B: -4330, -618        | upstream, upstream     | 1 | 23.500 | 2 | 1_Testes_ARID4B: |
| 1_Testes_ARID4B:                    | 368 in gene            | 1 | 31.000 | 1 | 1_Testes_ARID4B: |
| 1_Testes_ARID4B:                    | 22277 downstream       | 1 | 31.000 | 1 | 1_Testes_ARID4B: |
| 1_Testes_ARID4B: -5138, -6226       | upstream, upstream     | 1 | 30.000 | 2 | 1_Testes_ARID4B: |
| 1_Testes_ARID4B: 1383, 295          | in gene, in gene       | 1 | 30.000 | 2 | 1_Testes_ARID4B: |
| 1_Testes_ARID4B: 710, -378          | downstream, upstream   | 1 | 30.000 | 2 | 1_Testes_ARID4B: |
| 1_Testes_ARID4B:                    | 344 in gene            | 1 | 27.000 | 1 | 1_Testes_ARID4B: |
| 1_Testes_ARID4B:                    | -2098 upstream         | 1 | 23.000 | 1 | 1_Testes_ARID4B: |
| 1_Testes_ARID4B:                    | 7629 downstream        | 1 | 23.000 | 1 | 1_Testes_ARID4B: |
| 1_Testes_ARID4B: 131, -4509         | in gene, upstream      | 1 | 31.500 | 2 | 1_Testes_ARID4B: |
| 1_Testes_ARID4B: -4214, 426         | upstream, in gene      | 1 | 31.500 | 2 | 1_Testes_ARID4B: |
| 1_Testes_ARID4B: 26326, 822         | downstream, in gene    | 1 | 31.000 | 2 | 1_Testes_ARID4B: |
| 1_Testes_ARID4B:                    | -240 upstream          | 1 | 31.000 | 1 | 1_Testes_ARID4B: |
| 1_Testes_ARID4B: 43437, -10227      | downstream, upstream   | 1 | 27.000 | 2 | 1_Testes_ARID4B: |
| 1_Testes_ARID4B:                    | 215 in gene            | 1 | 23.000 | 1 | 1_Testes_ARID4B: |
| 1_Testes_ARID4B:                    | 1149 in gene           | 1 | 17.000 | 1 | 1_Testes_ARID4B: |

|                                         |                          |   |        |   |                  |
|-----------------------------------------|--------------------------|---|--------|---|------------------|
| 1_Testes_ARID4B:                        | 156 in gene              | 1 | 26.000 | 1 | 1_Testes_ARID4B: |
| 1_Testes_ARID4B:                        | 141 in gene              | 1 | 23.000 | 1 | 1_Testes_ARID4B: |
| 1_Testes_ARID4B:                        | 18529 downstream         | 1 | 35.000 | 1 | 1_Testes_ARID4B: |
| 1_Testes_ARID4B:                        | 326 in gene              | 1 | 35.000 | 1 | 1_Testes_ARID4B: |
| 1_Testes_ARID4B: 303, 26671, 28879, 333 | in gene, downstream, c   | 1 | 23.000 | 4 | 1_Testes_ARID4B: |
| 1_Testes_ARID4B: 6698, 4490, 26         | in gene, in gene, in gen | 1 | 20.333 | 3 | 1_Testes_ARID4B: |
| 1_Testes_ARID4B: 327, 14143             | in gene, downstream      | 1 | 31.000 | 2 | 1_Testes_ARID4B: |
| 1_Testes_ARID4B: 13993, 177             | downstream, in gene      | 1 | 31.000 | 2 | 1_Testes_ARID4B: |
| 1_Testes_ARID4B:                        | 104 in gene              | 1 | 24.000 | 1 | 1_Testes_ARID4B: |
| 1_Testes_ARID4B: 176, 14000, 22880, 259 | in gene, in gene, in gen | 1 | 22.000 | 7 | 1_Testes_ARID4B: |
| 1_Testes_ARID4B:                        | 9203 downstream          | 1 | 18.000 | 1 | 1_Testes_ARID4B: |
| 1_Testes_ARID4B:                        | 180 in gene              | 1 | 40.000 | 1 | 1_Testes_ARID4B: |
| 1_Testes_ARID4B:                        | 713 in gene              | 1 | 25.000 | 1 | 1_Testes_ARID4B: |
| 1_Testes_ARID4B:                        | 13763 downstream         | 1 | 25.000 | 1 | 1_Testes_ARID4B: |
| 1_Testes_ARID4B:                        | 515 in gene              | 1 | 34.000 | 1 | 1_Testes_ARID4B: |
| 1_Testes_ARID4B:                        | -1390 upstream           | 1 | 34.000 | 1 | 1_Testes_ARID4B: |
| 1_Testes_ARID4B: 26785, 129             | downstream, in gene      | 1 | 29.500 | 2 | 1_Testes_ARID4B: |
| 1_Testes_ARID4B:                        | -964 upstream            | 1 | 25.000 | 1 | 1_Testes_ARID4B: |
| 1_Testes_ARID4B:                        | 430 in gene              | 1 | 38.000 | 1 | 1_Testes_ARID4B: |
| 1_Testes_ARID4B: 55648, 352             | downstream, in gene      | 1 | 30.500 | 2 | 1_Testes_ARID4B: |
| 1_Testes_ARID4B:                        | 576 in gene              | 1 | 24.000 | 1 | 1_Testes_ARID4B: |
| 1_Testes_ARID4B:                        | -3363 upstream           | 1 | 24.000 | 1 | 1_Testes_ARID4B: |
| 1_Testes_ARID4B:                        | 31101 downstream         | 1 | 24.000 | 1 | 1_Testes_ARID4B: |
| 1_Testes_ARID4B: -8038, -9809           | upstream, upstream       | 1 | 21.000 | 2 | 1_Testes_ARID4B: |
| 1_Testes_ARID4B: 158, -1613             | in gene, upstream        | 1 | 21.000 | 2 | 1_Testes_ARID4B: |
| 1_Testes_ARID4B: -1541, 230             | upstream, in gene        | 1 | 21.000 | 2 | 1_Testes_ARID4B: |
| 1_Testes_ARID4B: 25821, 24050           | downstream, downstre     | 1 | 21.000 | 2 | 1_Testes_ARID4B: |
| 1_Testes_ARID4B:                        | -9991 upstream           | 1 | 24.000 | 1 | 1_Testes_ARID4B: |
| 1_Testes_ARID4B:                        | 1225 in gene             | 1 | 24.000 | 1 | 1_Testes_ARID4B: |
| 1_Testes_ARID4B: 11460, 409             | in gene, in gene         | 1 | 30.500 | 2 | 1_Testes_ARID4B: |
| 1_Testes_ARID4B:                        | 60916 downstream         | 1 | 38.000 | 1 | 1_Testes_ARID4B: |
| 1_Testes_ARID4B: 274, 9858, 12882       | in gene, downstream, c   | 1 | 26.667 | 3 | 1_Testes_ARID4B: |
| 1_Testes_ARID4B: -8043, 1541, 4565      | upstream, in gene, dow   | 1 | 26.667 | 3 | 1_Testes_ARID4B: |
| 1_Testes_ARID4B: -2673, 351, 12991      | upstream, in gene, dow   | 1 | 21.000 | 3 | 1_Testes_ARID4B: |
| 1_Testes_ARID4B: -7338, -4314, 8326     | upstream, upstream, d    | 1 | 21.000 | 3 | 1_Testes_ARID4B: |
| 1_Testes_ARID4B: 12459, -181            | downstream, upstream     | 1 | 20.500 | 2 | 1_Testes_ARID4B: |
| 1_Testes_ARID4B: 24227, 195             | downstream, in gene      | 1 | 23.000 | 2 | 1_Testes_ARID4B: |
| 1_Testes_ARID4B:                        | -483 upstream            | 1 | 25.000 | 1 | 1_Testes_ARID4B: |
| 1_Testes_ARID4B:                        | 14548 downstream         | 1 | 33.000 | 1 | 1_Testes_ARID4B: |
| 1_Testes_ARID4B:                        | 870 in gene              | 1 | 33.000 | 1 | 1_Testes_ARID4B: |
| 1_Testes_ARID4B:                        | 5011 downstream          | 1 | 33.000 | 1 | 1_Testes_ARID4B: |
| 1_Testes_ARID4B:                        | -5685 upstream           | 1 | 33.000 | 1 | 1_Testes_ARID4B: |
| 1_Testes_ARID4B:                        | 114 in gene              | 1 | 27.000 | 1 | 1_Testes_ARID4B: |
| 1_Testes_ARID4B: 34, 7506               | in gene, downstream      | 1 | 24.500 | 2 | 1_Testes_ARID4B: |
| 1_Testes_ARID4B: -7375, 97              | upstream, in gene        | 1 | 24.500 | 2 | 1_Testes_ARID4B: |
| 1_Testes_ARID4B:                        | -6727 upstream           | 1 | 22.000 | 1 | 1_Testes_ARID4B: |
| 1_Testes_ARID4B:                        | 37 in gene               | 1 | 39.000 | 1 | 1_Testes_ARID4B: |

|                                         |       |                        |   |        |   |                  |
|-----------------------------------------|-------|------------------------|---|--------|---|------------------|
| 1_Testes_ARID4B:                        | -8775 | upstream               | 1 | 39.000 | 1 | 1_Testes_ARID4B: |
| 1_Testes_ARID4B: 185, -7751             |       | in gene, upstream      | 1 | 29.000 | 2 | 1_Testes_ARID4B: |
| 1_Testes_ARID4B: 8085, 149              |       | downstream, in gene    | 1 | 29.000 | 2 | 1_Testes_ARID4B: |
| 1_Testes_ARID4B: -7837, 99, 17443       |       | upstream, in gene, dow | 1 | 41.000 | 3 | 1_Testes_ARID4B: |
| 1_Testes_ARID4B:                        | 283   | in gene                | 1 | 65.000 | 1 | 1_Testes_ARID4B: |
| 1_Testes_ARID4B: -5884, 17636           |       | upstream, downstream   | 1 | 48.000 | 2 | 1_Testes_ARID4B: |
| 1_Testes_ARID4B:                        | 151   | in gene                | 1 | 31.000 | 1 | 1_Testes_ARID4B: |
| 1_Testes_ARID4B:                        | -2290 | upstream               | 1 | 31.000 | 1 | 1_Testes_ARID4B: |
| 1_Testes_ARID4B:                        | 7378  | downstream             | 1 | 23.000 | 1 | 1_Testes_ARID4B: |
| 1_Testes_ARID4B:                        | 75    | in gene                | 1 | 23.000 | 1 | 1_Testes_ARID4B: |
| 1_Testes_ARID4B:                        | 439   | in gene                | 1 | 23.000 | 1 | 1_Testes_ARID4B: |
| 1_Testes_ARID4B:                        | -2704 | upstream               | 1 | 23.000 | 1 | 1_Testes_ARID4B: |
| 1_Testes_ARID4B: 168, -4312             |       | in gene, upstream      | 1 | 18.500 | 2 | 1_Testes_ARID4B: |
| 1_Testes_ARID4B: -4611, -131            |       | upstream, upstream     | 1 | 18.500 | 2 | 1_Testes_ARID4B: |
| 1_Testes_ARID4B:                        | 40604 | downstream             | 1 | 22.000 | 1 | 1_Testes_ARID4B: |
| 1_Testes_ARID4B:                        | 142   | in gene                | 1 | 21.000 | 1 | 1_Testes_ARID4B: |
| 1_Testes_ARID4B: 11087, 12607           |       | downstream, downstre   | 1 | 24.500 | 2 | 1_Testes_ARID4B: |
| 1_Testes_ARID4B: 581, -939              |       | in gene, upstream      | 1 | 24.500 | 2 | 1_Testes_ARID4B: |
| 1_Testes_ARID4B: 23048, 21528, 8952, 16 |       | downstream, downstre   | 1 | 27.333 | 6 | 1_Testes_ARID4B: |
| 1_Testes_ARID4B:                        | 14405 | downstream             | 1 | 24.000 | 1 | 1_Testes_ARID4B: |
| 1_Testes_ARID4B:                        | -291  | upstream               | 1 | 24.000 | 1 | 1_Testes_ARID4B: |
| 1_Testes_ARID4B:                        | 7278  | downstream             | 1 | 33.000 | 1 | 1_Testes_ARID4B: |
| 1_Testes_ARID4B: 10063, 367             |       | in gene, in gene       | 1 | 25.500 | 2 | 1_Testes_ARID4B: |
| 1_Testes_ARID4B:                        | 22587 | downstream             | 1 | 18.000 | 1 | 1_Testes_ARID4B: |
| 1_Testes_ARID4B:                        | 222   | in gene                | 1 | 23.000 | 1 | 1_Testes_ARID4B: |
| 1_Testes_ARID4B:                        | 1681  | in gene                | 1 | 31.000 | 1 | 1_Testes_ARID4B: |
| 1_Testes_ARID4B:                        | -19   | upstream               | 1 | 21.000 | 1 | 1_Testes_ARID4B: |
| 1_Testes_ARID4B: 641, 13057             |       | in gene, in gene       | 1 | 25.500 | 2 | 1_Testes_ARID4B: |
| 1_Testes_ARID4B:                        | -1    | upstream               | 1 | 21.000 | 1 | 1_Testes_ARID4B: |
| 1_Testes_ARID4B:                        | -268  | upstream               | 1 | 21.000 | 1 | 1_Testes_ARID4B: |
| 1_Testes_ARID4B:                        | -4193 | upstream               | 1 | 21.000 | 1 | 1_Testes_ARID4B: |
| 1_Testes_ARID4B:                        | 16224 | downstream             | 1 | 21.000 | 1 | 1_Testes_ARID4B: |
| 1_Testes_ARID4B:                        | 196   | in gene                | 1 | 29.000 | 1 | 1_Testes_ARID4B: |
| 1_Testes_ARID4B:                        | 283   | in gene                | 1 | 25.000 | 1 | 1_Testes_ARID4B: |
| 1_Testes_ARID4B:                        | 11464 | downstream             | 1 | 25.000 | 1 | 1_Testes_ARID4B: |
| 1_Testes_ARID4B:                        | 90    | in gene                | 1 | 22.000 | 1 | 1_Testes_ARID4B: |
| 1_Testes_ARID4B: -120, 13640, 15400     |       | upstream, downstream   | 1 | 24.667 | 3 | 1_Testes_ARID4B: |
| 1_Testes_ARID4B: -997, 763              |       | upstream, in gene      | 1 | 26.000 | 2 | 1_Testes_ARID4B: |
| 1_Testes_ARID4B:                        | -795  | upstream               | 1 | 18.000 | 1 | 1_Testes_ARID4B: |
| 1_Testes_ARID4B:                        | 190   | in gene                | 1 | 17.000 | 1 | 1_Testes_ARID4B: |
| 1_Testes_ARID4B:                        | 379   | in gene                | 1 | 22.000 | 1 | 1_Testes_ARID4B: |
| 1_Testes_ARID4B:                        | -114  | upstream               | 1 | 26.000 | 1 | 1_Testes_ARID4B: |
| 1_Testes_ARID4B:                        | 100   | in gene                | 1 | 26.000 | 1 | 1_Testes_ARID4B: |
| 1_Testes_ARID4B:                        | 225   | in gene                | 1 | 19.000 | 1 | 1_Testes_ARID4B: |
| 1_Testes_ARID4B:                        | 73    | in gene                | 1 | 39.000 | 1 | 1_Testes_ARID4B: |
| 1_Testes_ARID4B:                        | 1172  | in gene                | 1 | 16.000 | 1 | 1_Testes_ARID4B: |
| 1_Testes_ARID4B:                        | -333  | upstream               | 1 | 35.000 | 1 | 1_Testes_ARID4B: |



|                                    |       |                         |   |        |   |                  |
|------------------------------------|-------|-------------------------|---|--------|---|------------------|
| 1_Testes_ARID4B:                   | 34485 | downstream              | 1 | 25.000 | 1 | 1_Testes_ARID4B: |
| 1_Testes_ARID4B:                   | 279   | in gene                 | 1 | 25.000 | 1 | 1_Testes_ARID4B: |
| 1_Testes_ARID4B: 441, -839         |       | in gene, upstream       | 1 | 26.500 | 2 | 1_Testes_ARID4B: |
| 1_Testes_ARID4B: -538, 742, 111270 |       | upstream, in gene, dow  | 1 | 25.667 | 3 | 1_Testes_ARID4B: |
| 1_Testes_ARID4B:                   | 154   | in gene                 | 1 | 24.000 | 1 | 1_Testes_ARID4B: |
| 1_Testes_ARID4B:                   | 127   | in gene                 | 1 | 16.000 | 1 | 1_Testes_ARID4B: |
| 1_Testes_ARID4B:                   | 286   | in gene                 | 1 | 19.000 | 1 | 1_Testes_ARID4B: |
| 1_Testes_ARID4B:                   | 403   | in gene                 | 1 | 25.000 | 1 | 1_Testes_ARID4B: |
| 1_Testes_ARID4B:                   | 28885 | downstream              | 1 | 33.000 | 1 | 1_Testes_ARID4B: |
| 1_Testes_ARID4B: 216, 29304        |       | in gene, downstream     | 1 | 25.000 | 2 | 1_Testes_ARID4B: |
| 1_Testes_ARID4B:                   | 69    | in gene                 | 1 | 17.000 | 1 | 1_Testes_ARID4B: |
| 1_Testes_ARID4B:                   | 122   | in gene                 | 1 | 39.000 | 1 | 1_Testes_ARID4B: |
| 1_Testes_ARID4B:                   | -625  | upstream                | 1 | 27.000 | 1 | 1_Testes_ARID4B: |
| 1_Testes_ARID4B:                   | 66    | in gene                 | 1 | 27.000 | 1 | 1_Testes_ARID4B: |
| 1_Testes_ARID4B:                   | 16231 | downstream              | 1 | 25.000 | 1 | 1_Testes_ARID4B: |
| 1_Testes_ARID4B:                   | 556   | in gene                 | 1 | 25.000 | 1 | 1_Testes_ARID4B: |
| 1_Testes_ARID4B:                   | -4256 | upstream                | 1 | 25.000 | 1 | 1_Testes_ARID4B: |
| 1_Testes_ARID4B:                   | 130   | in gene                 | 1 | 36.000 | 1 | 1_Testes_ARID4B: |
| 1_Testes_ARID4B: 145, -8863        |       | in gene, upstream       | 1 | 34.000 | 2 | 1_Testes_ARID4B: |
| 1_Testes_ARID4B: 9102, 94          |       | downstream, in gene     | 1 | 34.000 | 2 | 1_Testes_ARID4B: |
| 1_Testes_ARID4B: 3367, -5641       |       | downstream, upstream    | 1 | 34.000 | 2 | 1_Testes_ARID4B: |
| 1_Testes_ARID4B: -9860, -852       |       | upstream, upstream      | 1 | 34.000 | 2 | 1_Testes_ARID4B: |
| 1_Testes_ARID4B:                   | 235   | in gene                 | 1 | 18.000 | 1 | 1_Testes_ARID4B: |
| 1_Testes_ARID4B:                   | 293   | in gene                 | 1 | 52.000 | 1 | 1_Testes_ARID4B: |
| 1_Testes_ARID4B:                   | 485   | in gene                 | 1 | 30.000 | 1 | 1_Testes_ARID4B: |
| 1_Testes_ARID4B:                   | 544   | in gene                 | 1 | 23.000 | 1 | 1_Testes_ARID4B: |
| 1_Testes_ARID4B:                   | -9352 | upstream                | 1 | 23.000 | 1 | 1_Testes_ARID4B: |
| 1_Testes_ARID4B:                   | 14746 | in gene                 | 1 | 22.000 | 1 | 1_Testes_ARID4B: |
| 1_Testes_ARID4B:                   | -504  | upstream                | 1 | 22.000 | 1 | 1_Testes_ARID4B: |
| 1_Testes_ARID4B: 992, 208          |       | in gene, in gene        | 1 | 17.500 | 2 | 1_Testes_ARID4B: |
| 1_Testes_ARID4B:                   | 496   | in gene                 | 1 | 26.000 | 1 | 1_Testes_ARID4B: |
| 1_Testes_ARID4B:                   | 227   | in gene                 | 1 | 15.000 | 1 | 1_Testes_ARID4B: |
| 1_Testes_ARID4B:                   | 1475  | in gene                 | 1 | 25.000 | 1 | 1_Testes_ARID4B: |
| 1_Testes_ARID4B:                   | 16365 | downstream              | 1 | 33.000 | 1 | 1_Testes_ARID4B: |
| 1_Testes_ARID4B:                   | 422   | in gene                 | 1 | 33.000 | 1 | 1_Testes_ARID4B: |
| 1_Testes_ARID4B:                   | 438   | in gene                 | 1 | 33.000 | 1 | 1_Testes_ARID4B: |
| 1_Testes_ARID4B: 1148, 124         |       | in gene, in gene        | 1 | 25.000 | 2 | 1_Testes_ARID4B: |
| 1_Testes_ARID4B: -926, 98          |       | upstream, in gene       | 1 | 25.000 | 2 | 1_Testes_ARID4B: |
| 1_Testes_ARID4B:                   | 125   | in gene                 | 1 | 36.000 | 1 | 1_Testes_ARID4B: |
| 1_Testes_ARID4B:                   | 27    | in gene                 | 1 | 28.000 | 1 | 1_Testes_ARID4B: |
| 1_Testes_ARID4B: -866, 670, 2846   |       | upstream, in gene, in g | 1 | 30.333 | 3 | 1_Testes_ARID4B: |
| 1_Testes_ARID4B: 16128, 13952      |       | downstream, downstre    | 1 | 36.500 | 2 | 1_Testes_ARID4B: |
| 1_Testes_ARID4B:                   | 167   | in gene                 | 1 | 43.000 | 1 | 1_Testes_ARID4B: |
| 1_Testes_ARID4B:                   | -569  | upstream                | 1 | 30.000 | 1 | 1_Testes_ARID4B: |
| 1_Testes_ARID4B:                   | 308   | in gene                 | 1 | 30.000 | 1 | 1_Testes_ARID4B: |
| 1_Testes_ARID4B:                   | 135   | in gene                 | 1 | 30.000 | 1 | 1_Testes_ARID4B: |
| 1_Testes_ARID4B: 991, -993         |       | in gene, upstream       | 1 | 19.500 | 2 | 1_Testes_ARID4B: |

|                                          |       |                          |   |        |   |                  |
|------------------------------------------|-------|--------------------------|---|--------|---|------------------|
| 1_Testes_ARID4B:                         | 417   | in gene                  | 1 | 40.000 | 1 | 1_Testes_ARID4B: |
| 1_Testes_ARID4B: -6508, 35508            |       | upstream, in gene        | 1 | 30.500 | 2 | 1_Testes_ARID4B: |
| 1_Testes_ARID4B:                         | 404   | in gene                  | 1 | 26.000 | 1 | 1_Testes_ARID4B: |
| 1_Testes_ARID4B:                         | 62353 | downstream               | 1 | 25.000 | 1 | 1_Testes_ARID4B: |
| 1_Testes_ARID4B:                         | 17403 | in gene                  | 1 | 25.000 | 1 | 1_Testes_ARID4B: |
| 1_Testes_ARID4B:                         | 519   | in gene                  | 1 | 18.000 | 1 | 1_Testes_ARID4B: |
| 1_Testes_ARID4B: 436, 22020              |       | in gene, downstream      | 1 | 23.500 | 2 | 1_Testes_ARID4B: |
| 1_Testes_ARID4B: 170, 16842              |       | in gene, downstream      | 1 | 24.000 | 2 | 1_Testes_ARID4B: |
| 1_Testes_ARID4B:                         | -689  | upstream                 | 1 | 23.000 | 1 | 1_Testes_ARID4B: |
| 1_Testes_ARID4B:                         | 482   | in gene                  | 1 | 23.000 | 1 | 1_Testes_ARID4B: |
| 1_Testes_ARID4B:                         | 13287 | downstream               | 1 | 23.000 | 1 | 1_Testes_ARID4B: |
| 1_Testes_ARID4B: 83, 16035               |       | in gene, downstream      | 1 | 27.000 | 2 | 1_Testes_ARID4B: |
| 1_Testes_ARID4B:                         | 102   | in gene                  | 1 | 31.000 | 1 | 1_Testes_ARID4B: |
| 1_Testes_ARID4B: 22658, 290              |       | downstream, in gene      | 1 | 32.000 | 2 | 1_Testes_ARID4B: |
| 1_Testes_ARID4B: 22150, 742              |       | downstream, in gene      | 1 | 27.500 | 2 | 1_Testes_ARID4B: |
| 1_Testes_ARID4B: 140, -8884              |       | in gene, upstream        | 1 | 31.000 | 2 | 1_Testes_ARID4B: |
| 1_Testes_ARID4B: -375, 8649              |       | upstream, downstream     | 1 | 31.000 | 2 | 1_Testes_ARID4B: |
| 1_Testes_ARID4B: 9193, 169               |       | downstream, in gene      | 1 | 31.000 | 2 | 1_Testes_ARID4B: |
| 1_Testes_ARID4B: 24519, 15495            |       | downstream, downstre     | 1 | 31.000 | 2 | 1_Testes_ARID4B: |
| 1_Testes_ARID4B:                         | 37927 | downstream               | 1 | 28.000 | 1 | 1_Testes_ARID4B: |
| 1_Testes_ARID4B: 10232, 488, -1288, -102 |       | in gene, in gene, upstre | 1 | 24.750 | 4 | 1_Testes_ARID4B: |
| 1_Testes_ARID4B: -1635, 141, 9069        |       | upstream, in gene, dow   | 1 | 23.667 | 3 | 1_Testes_ARID4B: |
| 1_Testes_ARID4B: -9178, -250, 35478      |       | upstream, upstream, di   | 1 | 24.667 | 3 | 1_Testes_ARID4B: |
| 1_Testes_ARID4B:                         | 353   | in gene                  | 1 | 25.000 | 1 | 1_Testes_ARID4B: |
| 1_Testes_ARID4B:                         | 30803 | in gene                  | 1 | 20.000 | 1 | 1_Testes_ARID4B: |
| 1_Testes_ARID4B:                         | 7191  | downstream               | 1 | 20.000 | 1 | 1_Testes_ARID4B: |
| 1_Testes_ARID4B:                         | 248   | in gene                  | 1 | 43.000 | 1 | 1_Testes_ARID4B: |
| 1_Testes_ARID4B:                         | -6066 | upstream                 | 1 | 43.000 | 1 | 1_Testes_ARID4B: |
| 1_Testes_ARID4B: 2395, 219               |       | in gene, in gene         | 1 | 35.500 | 2 | 1_Testes_ARID4B: |
| 1_Testes_ARID4B:                         | 472   | in gene                  | 1 | 36.000 | 1 | 1_Testes_ARID4B: |
| 1_Testes_ARID4B: 8212, -6572             |       | downstream, upstream     | 1 | 27.500 | 2 | 1_Testes_ARID4B: |
| 1_Testes_ARID4B:                         | 22738 | in gene                  | 1 | 19.000 | 1 | 1_Testes_ARID4B: |
| 1_Testes_ARID4B:                         | 43    | in gene                  | 1 | 20.000 | 1 | 1_Testes_ARID4B: |
| 1_Testes_ARID4B: 36169, 169              |       | downstream, in gene      | 1 | 21.000 | 2 | 1_Testes_ARID4B: |
| 1_Testes_ARID4B:                         | -6891 | upstream                 | 1 | 22.000 | 1 | 1_Testes_ARID4B: |
| 1_Testes_ARID4B:                         | 591   | in gene                  | 1 | 22.000 | 1 | 1_Testes_ARID4B: |
| 1_Testes_ARID4B: 78269, -216             |       | downstream, upstream     | 1 | 22.500 | 2 | 1_Testes_ARID4B: |
| 1_Testes_ARID4B: 626, 3442               |       | in gene, in gene         | 1 | 34.000 | 2 | 1_Testes_ARID4B: |
| 1_Testes_ARID4B: 19627, 16811            |       | downstream, downstre     | 1 | 34.000 | 2 | 1_Testes_ARID4B: |
| 1_Testes_ARID4B:                         | 106   | in gene                  | 1 | 28.000 | 1 | 1_Testes_ARID4B: |
| 1_Testes_ARID4B:                         | 1529  | in gene                  | 1 | 29.000 | 1 | 1_Testes_ARID4B: |
| 1_Testes_ARID4B: 48007, 391              |       | downstream, in gene      | 1 | 33.500 | 2 | 1_Testes_ARID4B: |
| 1_Testes_ARID4B:                         | -2933 | upstream                 | 1 | 17.000 | 1 | 1_Testes_ARID4B: |
| 1_Testes_ARID4B:                         | 489   | in gene                  | 1 | 42.000 | 1 | 1_Testes_ARID4B: |
| 1_Testes_ARID4B:                         | -3284 | upstream                 | 1 | 42.000 | 1 | 1_Testes_ARID4B: |
| 1_Testes_ARID4B:                         | 302   | in gene                  | 1 | 26.000 | 1 | 1_Testes_ARID4B: |
| 1_Testes_ARID4B: 15705, 345, -9367       |       | downstream, in gene, u   | 1 | 46.667 | 3 | 1_Testes_ARID4B: |

|                                         |                         |   |        |   |                  |
|-----------------------------------------|-------------------------|---|--------|---|------------------|
| 1_Testes_ARID4B: -411, 9301             | upstream, downstream    | 1 | 57.000 | 2 | 1_Testes_ARID4B: |
| 1_Testes_ARID4B: 9990, 278              | downstream, in gene     | 1 | 57.000 | 2 | 1_Testes_ARID4B: |
| 1_Testes_ARID4B:                        | -1199 upstream          | 1 | 56.000 | 1 | 1_Testes_ARID4B: |
| 1_Testes_ARID4B:                        | 220 in gene             | 1 | 36.000 | 1 | 1_Testes_ARID4B: |
| 1_Testes_ARID4B:                        | 66718 in gene           | 1 | 27.000 | 1 | 1_Testes_ARID4B: |
| 1_Testes_ARID4B: 79, 1399               | in gene, in gene        | 1 | 24.000 | 2 | 1_Testes_ARID4B: |
| 1_Testes_ARID4B:                        | 603 in gene             | 1 | 21.000 | 1 | 1_Testes_ARID4B: |
| 1_Testes_ARID4B:                        | -2217 upstream          | 1 | 21.000 | 1 | 1_Testes_ARID4B: |
| 1_Testes_ARID4B:                        | 12180 downstream        | 1 | 30.000 | 1 | 1_Testes_ARID4B: |
| 1_Testes_ARID4B:                        | 173 in gene             | 1 | 30.000 | 1 | 1_Testes_ARID4B: |
| 1_Testes_ARID4B:                        | 16174 downstream        | 1 | 30.000 | 1 | 1_Testes_ARID4B: |
| 1_Testes_ARID4B:                        | 23361 downstream        | 1 | 25.000 | 1 | 1_Testes_ARID4B: |
| 1_Testes_ARID4B:                        | 43 in gene              | 1 | 25.000 | 1 | 1_Testes_ARID4B: |
| 1_Testes_ARID4B:                        | 12496 downstream        | 1 | 43.000 | 1 | 1_Testes_ARID4B: |
| 1_Testes_ARID4B:                        | 278 in gene             | 1 | 43.000 | 1 | 1_Testes_ARID4B: |
| 1_Testes_ARID4B:                        | 1998 in gene            | 1 | 43.000 | 1 | 1_Testes_ARID4B: |
| 1_Testes_ARID4B:                        | 1158 in gene            | 1 | 36.000 | 1 | 1_Testes_ARID4B: |
| 1_Testes_ARID4B:                        | 55 in gene              | 1 | 17.000 | 1 | 1_Testes_ARID4B: |
| 1_Testes_ARID4B:                        | 19 in gene              | 1 | 32.000 | 1 | 1_Testes_ARID4B: |
| 1_Testes_ARID4B:                        | 286 in gene             | 1 | 28.000 | 1 | 1_Testes_ARID4B: |
| 1_Testes_ARID4B:                        | -9625 upstream          | 1 | 28.000 | 1 | 1_Testes_ARID4B: |
| 1_Testes_ARID4B: 395, 16158             | in gene, downstream     | 1 | 25.000 | 2 | 1_Testes_ARID4B: |
| 1_Testes_ARID4B: 1726, -6191            | in gene, upstream       | 1 | 17.000 | 2 | 1_Testes_ARID4B: |
| 1_Testes_ARID4B:                        | 5133 in gene            | 1 | 25.000 | 1 | 1_Testes_ARID4B: |
| 1_Testes_ARID4B: 17699, 83              | in gene, in gene        | 1 | 24.000 | 2 | 1_Testes_ARID4B: |
| 1_Testes_ARID4B:                        | -156 upstream           | 1 | 24.000 | 1 | 1_Testes_ARID4B: |
| 1_Testes_ARID4B:                        | -149 upstream           | 1 | 28.000 | 1 | 1_Testes_ARID4B: |
| 1_Testes_ARID4B:                        | 40573 downstream        | 1 | 31.000 | 1 | 1_Testes_ARID4B: |
| 1_Testes_ARID4B:                        | 150 in gene             | 1 | 31.000 | 1 | 1_Testes_ARID4B: |
| 1_Testes_ARID4B: -197, 34491            | upstream, downstream    | 1 | 30.000 | 2 | 1_Testes_ARID4B: |
| 1_Testes_ARID4B:                        | -424 upstream           | 1 | 29.000 | 1 | 1_Testes_ARID4B: |
| 1_Testes_ARID4B: -3052, 98271           | upstream, downstream    | 1 | 27.500 | 2 | 1_Testes_ARID4B: |
| 1_Testes_ARID4B:                        | 24 in gene              | 1 | 26.000 | 1 | 1_Testes_ARID4B: |
| 1_Testes_ARID4B:                        | 316 in gene             | 1 | 27.000 | 1 | 1_Testes_ARID4B: |
| 1_Testes_ARID4B:                        | -1126 upstream          | 1 | 27.000 | 1 | 1_Testes_ARID4B: |
| 1_Testes_ARID4B:                        | -19 upstream            | 1 | 25.000 | 1 | 1_Testes_ARID4B: |
| 1_Testes_ARID4B:                        | -18 upstream            | 1 | 59.000 | 1 | 1_Testes_ARID4B: |
| 1_Testes_ARID4B: 332, 66252             | in gene, downstream     | 1 | 25.000 | 2 | 1_Testes_ARID4B: |
| 1_Testes_ARID4B:                        | 37801 in gene           | 1 | 17.000 | 1 | 1_Testes_ARID4B: |
| 1_Testes_ARID4B:                        | 5518 downstream         | 1 | 17.000 | 1 | 1_Testes_ARID4B: |
| 1_Testes_ARID4B:                        | -5423 upstream          | 1 | 17.000 | 1 | 1_Testes_ARID4B: |
| 1_Testes_ARID4B: 641, 2721, 4353        | in gene, downstream, c  | 1 | 28.000 | 3 | 1_Testes_ARID4B: |
| 1_Testes_ARID4B: 3872, 1792, 160        | downstream, in gene, i  | 1 | 28.000 | 3 | 1_Testes_ARID4B: |
| 1_Testes_ARID4B: -1811, 1933, 3789, 216 | upstream, in gene, in g | 1 | 28.750 | 4 | 1_Testes_ARID4B: |
| 1_Testes_ARID4B: 4982, 1238, -618       | downstream, downstre    | 1 | 31.333 | 3 | 1_Testes_ARID4B: |
| 1_Testes_ARID4B: 196, -924              | in gene, upstream       | 1 | 40.500 | 2 | 1_Testes_ARID4B: |
| 1_Testes_ARID4B: -390, 730              | upstream, in gene       | 1 | 40.500 | 2 | 1_Testes_ARID4B: |

|                                          |                         |   |        |   |                  |
|------------------------------------------|-------------------------|---|--------|---|------------------|
| 1_Testes_ARID4B: 226, 16818              | in gene, downstream     | 1 | 23.500 | 2 | 1_Testes_ARID4B: |
| 1_Testes_ARID4B: 16986, 394              | downstream, in gene     | 1 | 23.500 | 2 | 1_Testes_ARID4B: |
| 1_Testes_ARID4B: 59348, 420              | downstream, in gene     | 1 | 26.000 | 2 | 1_Testes_ARID4B: |
| 1_Testes_ARID4B:                         | -5351 upstream          | 1 | 25.000 | 1 | 1_Testes_ARID4B: |
| 1_Testes_ARID4B: 16203, -4661            | downstream, upstream    | 1 | 27.500 | 2 | 1_Testes_ARID4B: |
| 1_Testes_ARID4B:                         | -81 upstream            | 1 | 30.000 | 1 | 1_Testes_ARID4B: |
| 1_Testes_ARID4B:                         | 15 in gene              | 1 | 30.000 | 1 | 1_Testes_ARID4B: |
| 1_Testes_ARID4B:                         | 9456 downstream         | 1 | 30.000 | 1 | 1_Testes_ARID4B: |
| 1_Testes_ARID4B: -9491, 11517, 16109, 1  | upstream, in gene, in g | 1 | 26.000 | 5 | 1_Testes_ARID4B: |
| 1_Testes_ARID4B: -5517, -925, 56, 7315   | upstream, upstream, in  | 1 | 25.000 | 4 | 1_Testes_ARID4B: |
| 1_Testes_ARID4B: 9601, 5009, 4028, -323  | downstream, downstre    | 1 | 25.000 | 4 | 1_Testes_ARID4B: |
| 1_Testes_ARID4B: -8093, -7112, 147       | upstream, upstream, in  | 1 | 26.000 | 3 | 1_Testes_ARID4B: |
| 1_Testes_ARID4B:                         | 18617 downstream        | 1 | 29.000 | 1 | 1_Testes_ARID4B: |
| 1_Testes_ARID4B:                         | 383 in gene             | 1 | 29.000 | 1 | 1_Testes_ARID4B: |
| 1_Testes_ARID4B:                         | 1788 downstream         | 1 | 29.000 | 1 | 1_Testes_ARID4B: |
| 1_Testes_ARID4B: 168, -8152, -8632       | in gene, upstream, upsi | 1 | 28.333 | 3 | 1_Testes_ARID4B: |
| 1_Testes_ARID4B: 8852, 532, 52           | downstream, in gene, in | 1 | 28.333 | 3 | 1_Testes_ARID4B: |
| 1_Testes_ARID4B: 909, -243               | in gene, upstream       | 1 | 20.500 | 2 | 1_Testes_ARID4B: |
| 1_Testes_ARID4B: -965, 187               | upstream, in gene       | 1 | 20.500 | 2 | 1_Testes_ARID4B: |
| 1_Testes_ARID4B:                         | -9869 upstream          | 1 | 22.000 | 1 | 1_Testes_ARID4B: |
| 1_Testes_ARID4B:                         | -6718 upstream          | 1 | 44.000 | 1 | 1_Testes_ARID4B: |
| 1_Testes_ARID4B: 394, -4534, -7766, -866 | in gene, upstream, upsi | 1 | 27.500 | 4 | 1_Testes_ARID4B: |
| 1_Testes_ARID4B: 8939, 4011, 779, -117   | downstream, in gene, in | 1 | 27.500 | 4 | 1_Testes_ARID4B: |
| 1_Testes_ARID4B: 14134, 10902, 10006     | downstream, downstre    | 1 | 22.000 | 3 | 1_Testes_ARID4B: |
| 1_Testes_ARID4B: 147, 40355              | in gene, downstream     | 1 | 25.000 | 2 | 1_Testes_ARID4B: |
| 1_Testes_ARID4B: 439, -7897              | in gene, upstream       | 1 | 26.000 | 2 | 1_Testes_ARID4B: |
| 1_Testes_ARID4B: -625, 7711              | upstream, downstream    | 1 | 26.000 | 2 | 1_Testes_ARID4B: |
| 1_Testes_ARID4B: -8140, 196              | upstream, in gene       | 1 | 26.000 | 2 | 1_Testes_ARID4B: |
| 1_Testes_ARID4B:                         | 5617 downstream         | 1 | 25.000 | 1 | 1_Testes_ARID4B: |
| 1_Testes_ARID4B:                         | 10357 downstream        | 1 | 25.000 | 1 | 1_Testes_ARID4B: |
| 1_Testes_ARID4B: 236, -556               | in gene, upstream       | 1 | 27.500 | 2 | 1_Testes_ARID4B: |
| 1_Testes_ARID4B: -304, 488, 11792        | upstream, in gene, dow  | 1 | 25.333 | 3 | 1_Testes_ARID4B: |
| 1_Testes_ARID4B: 12427, 11635, 331       | downstream, downstre    | 1 | 25.333 | 3 | 1_Testes_ARID4B: |
| 1_Testes_ARID4B: 28483, 515              | downstream, in gene     | 1 | 36.000 | 2 | 1_Testes_ARID4B: |
| 1_Testes_ARID4B:                         | 108840 downstream       | 1 | 51.000 | 1 | 1_Testes_ARID4B: |
| 1_Testes_ARID4B:                         | 1020 in gene            | 1 | 18.000 | 1 | 1_Testes_ARID4B: |
| 1_Testes_ARID4B:                         | 165 in gene             | 1 | 93.000 | 1 | 1_Testes_ARID4B: |
| 1_Testes_ARID4B:                         | -95 upstream            | 1 | 17.000 | 1 | 1_Testes_ARID4B: |
| 1_Testes_ARID4B:                         | 136 in gene             | 1 | 41.000 | 1 | 1_Testes_ARID4B: |
| 1_Testes_ARID4B:                         | 79 in gene              | 1 | 41.000 | 1 | 1_Testes_ARID4B: |
| 1_Testes_ARID4B:                         | 143 in gene             | 1 | 35.000 | 1 | 1_Testes_ARID4B: |
| 1_Testes_ARID4B:                         | 33947 downstream        | 1 | 35.000 | 1 | 1_Testes_ARID4B: |
| 1_Testes_ARID4B:                         | 17111 downstream        | 1 | 28.000 | 1 | 1_Testes_ARID4B: |
| 1_Testes_ARID4B:                         | 115 in gene             | 1 | 28.000 | 1 | 1_Testes_ARID4B: |
| 1_Testes_ARID4B:                         | 421 in gene             | 1 | 24.000 | 1 | 1_Testes_ARID4B: |
| 1_Testes_ARID4B:                         | 241 in gene             | 1 | 25.000 | 1 | 1_Testes_ARID4B: |
| 1_Testes_ARID4B:                         | -645 upstream           | 1 | 37.000 | 1 | 1_Testes_ARID4B: |

|                                 |                          |   |        |   |                  |
|---------------------------------|--------------------------|---|--------|---|------------------|
| 1_Testes_ARID4B:                | 535 in gene              | 1 | 37.000 | 1 | 1_Testes_ARID4B: |
| 1_Testes_ARID4B:-183, 281       | upstream, in gene        | 1 | 19.500 | 2 | 1_Testes_ARID4B: |
| 1_Testes_ARID4B:                | 1148 in gene             | 1 | 26.000 | 1 | 1_Testes_ARID4B: |
| 1_Testes_ARID4B:                | -53 upstream             | 1 | 17.000 | 1 | 1_Testes_ARID4B: |
| 1_Testes_ARID4B:670, 158        | in gene, in gene         | 1 | 27.000 | 2 | 1_Testes_ARID4B: |
| 1_Testes_ARID4B:                | 187 in gene              | 1 | 15.000 | 1 | 1_Testes_ARID4B: |
| 1_Testes_ARID4B:                | -1895 upstream           | 1 | 15.000 | 1 | 1_Testes_ARID4B: |
| 1_Testes_ARID4B:192, -9904      | in gene, upstream        | 1 | 28.000 | 2 | 1_Testes_ARID4B: |
| 1_Testes_ARID4B:-10025, 71      | upstream, in gene        | 1 | 28.000 | 2 | 1_Testes_ARID4B: |
| 1_Testes_ARID4B:                | 610 in gene              | 1 | 17.000 | 1 | 1_Testes_ARID4B: |
| 1_Testes_ARID4B:                | 282 in gene              | 1 | 21.000 | 1 | 1_Testes_ARID4B: |
| 1_Testes_ARID4B:                | 1532 in gene             | 1 | 27.000 | 1 | 1_Testes_ARID4B: |
| 1_Testes_ARID4B:                | 901 in gene              | 1 | 34.000 | 1 | 1_Testes_ARID4B: |
| 1_Testes_ARID4B:                | -8871 upstream           | 1 | 16.000 | 1 | 1_Testes_ARID4B: |
| 1_Testes_ARID4B:                | 5014 in gene             | 1 | 16.000 | 1 | 1_Testes_ARID4B: |
| 1_Testes_ARID4B:                | 21005 downstream         | 1 | 35.000 | 1 | 1_Testes_ARID4B: |
| 1_Testes_ARID4B:                | 196 in gene              | 1 | 35.000 | 1 | 1_Testes_ARID4B: |
| 1_Testes_ARID4B:                | -421 upstream            | 1 | 24.000 | 1 | 1_Testes_ARID4B: |
| 1_Testes_ARID4B:                | 322 in gene              | 1 | 24.000 | 1 | 1_Testes_ARID4B: |
| 1_Testes_ARID4B:                | 113 in gene              | 1 | 19.000 | 1 | 1_Testes_ARID4B: |
| 1_Testes_ARID4B:4364, 1836, 284 | in gene, in gene, in gen | 1 | 29.333 | 3 | 1_Testes_ARID4B: |
| 1_Testes_ARID4B:                | 86 in gene               | 1 | 23.000 | 1 | 1_Testes_ARID4B: |
| 1_Testes_ARID4B:                | 1105 in gene             | 1 | 24.000 | 1 | 1_Testes_ARID4B: |
| 1_Testes_ARID4B:                | 226 in gene              | 1 | 32.000 | 1 | 1_Testes_ARID4B: |
| 1_Testes_ARID4B:374, -10298     | in gene, upstream        | 1 | 31.000 | 2 | 1_Testes_ARID4B: |
| 1_Testes_ARID4B:-10453, 219     | upstream, in gene        | 1 | 31.000 | 2 | 1_Testes_ARID4B: |
| 1_Testes_ARID4B:                | -450 upstream            | 1 | 27.000 | 1 | 1_Testes_ARID4B: |
| 1_Testes_ARID4B:                | 125 in gene              | 1 | 31.000 | 1 | 1_Testes_ARID4B: |
| 1_Testes_ARID4B:                | 439 in gene              | 1 | 39.000 | 1 | 1_Testes_ARID4B: |
| 1_Testes_ARID4B:                | 226 in gene              | 1 | 33.000 | 1 | 1_Testes_ARID4B: |
| 1_Testes_ARID4B:                | 30215 downstream         | 1 | 28.000 | 1 | 1_Testes_ARID4B: |
| 1_Testes_ARID4B:                | 120 in gene              | 1 | 28.000 | 1 | 1_Testes_ARID4B: |
| 1_Testes_ARID4B:                | 57079 downstream         | 1 | 28.000 | 1 | 1_Testes_ARID4B: |
| 1_Testes_ARID4B:                | 133 in gene              | 1 | 39.000 | 1 | 1_Testes_ARID4B: |
| 1_Testes_ARID4B:                | 98 in gene               | 1 | 38.000 | 1 | 1_Testes_ARID4B: |
| 1_Testes_ARID4B:                | 12 in gene               | 1 | 30.000 | 1 | 1_Testes_ARID4B: |
| 1_Testes_ARID4B:                | 408 in gene              | 1 | 25.000 | 1 | 1_Testes_ARID4B: |
| 1_Testes_ARID4B:                | 353 in gene              | 1 | 26.000 | 1 | 1_Testes_ARID4B: |
| 1_Testes_ARID4B:                | 1102 in gene             | 1 | 34.000 | 1 | 1_Testes_ARID4B: |
| 1_Testes_ARID4B:                | 241 in gene              | 1 | 57.000 | 1 | 1_Testes_ARID4B: |
| 1_Testes_ARID4B:                | 46 in gene               | 1 | 27.000 | 1 | 1_Testes_ARID4B: |
| 1_Testes_ARID4B:                | 108 in gene              | 1 | 28.000 | 1 | 1_Testes_ARID4B: |
| 1_Testes_ARID4B:                | 530 in gene              | 1 | 25.000 | 1 | 1_Testes_ARID4B: |
| 1_Testes_ARID4B:                | 269 in gene              | 1 | 26.000 | 1 | 1_Testes_ARID4B: |
| 1_Testes_ARID4B:                | 817 in gene              | 1 | 15.000 | 1 | 1_Testes_ARID4B: |
| 1_Testes_ARID4B:                | 1175 in gene             | 1 | 16.000 | 1 | 1_Testes_ARID4B: |
| 1_Testes_ARID4B:111919, 351     | downstream, in gene      | 1 | 20.500 | 2 | 1_Testes_ARID4B: |

|                              |                     |   |        |   |                  |
|------------------------------|---------------------|---|--------|---|------------------|
| 1_Testes_ARID4B: 315, 795    | in gene, in gene    | 1 | 24.000 | 2 | 1_Testes_ARID4B: |
| 1_Testes_ARID4B:             | -627 upstream       | 1 | 24.000 | 1 | 1_Testes_ARID4B: |
| 1_Testes_ARID4B:             | 471 in gene         | 1 | 24.000 | 1 | 1_Testes_ARID4B: |
| 1_Testes_ARID4B:             | 136 in gene         | 1 | 26.000 | 1 | 1_Testes_ARID4B: |
| 1_Testes_ARID4B: 313, 772    | in gene, in gene    | 1 | 20.000 | 2 | 1_Testes_ARID4B: |
| 1_Testes_ARID4B:             | 491 in gene         | 1 | 22.000 | 1 | 1_Testes_ARID4B: |
| 1_Testes_ARID4B:             | -7421 upstream      | 1 | 22.000 | 1 | 1_Testes_ARID4B: |
| 1_Testes_ARID4B:             | 141 in gene         | 1 | 25.000 | 1 | 1_Testes_ARID4B: |
| 1_Testes_ARID4B:             | 169 in gene         | 1 | 30.000 | 1 | 1_Testes_ARID4B: |
| 1_Testes_ARID4B:             | -468 upstream       | 1 | 30.000 | 1 | 1_Testes_ARID4B: |
| 1_Testes_ARID4B:             | -1166 upstream      | 1 | 26.000 | 1 | 1_Testes_ARID4B: |
| 1_Testes_ARID4B:             | 145 in gene         | 1 | 26.000 | 1 | 1_Testes_ARID4B: |
| 1_Testes_ARID4B:             | -1362 upstream      | 1 | 17.000 | 1 | 1_Testes_ARID4B: |
| 1_Testes_ARID4B:             | 323 in gene         | 1 | 27.000 | 1 | 1_Testes_ARID4B: |
| 1_Testes_ARID4B:             | -514 upstream       | 1 | 35.000 | 1 | 1_Testes_ARID4B: |
| 1_Testes_ARID4B:             | 251 in gene         | 1 | 35.000 | 1 | 1_Testes_ARID4B: |
| 1_Testes_ARID4B:             | 94 in gene          | 1 | 27.000 | 1 | 1_Testes_ARID4B: |
| 1_Testes_ARID4B:             | 307 in gene         | 1 | 26.000 | 1 | 1_Testes_ARID4B: |
| 1_Testes_ARID4B:             | 583 in gene         | 1 | 20.000 | 1 | 1_Testes_ARID4B: |
| 1_Testes_ARID4B:             | 522 in gene         | 1 | 24.000 | 1 | 1_Testes_ARID4B: |
| 1_Testes_ARID4B:             | 426 in gene         | 1 | 24.000 | 1 | 1_Testes_ARID4B: |
| 1_Testes_ARID4B: 448, -320   | in gene, upstream   | 1 | 27.500 | 2 | 1_Testes_ARID4B: |
| 1_Testes_ARID4B: 903, 1671   | in gene, in gene    | 1 | 27.500 | 2 | 1_Testes_ARID4B: |
| 1_Testes_ARID4B:             | 217 in gene         | 1 | 25.000 | 1 | 1_Testes_ARID4B: |
| 1_Testes_ARID4B:             | 201 in gene         | 1 | 28.000 | 1 | 1_Testes_ARID4B: |
| 1_Testes_ARID4B:             | 142 in gene         | 1 | 24.000 | 1 | 1_Testes_ARID4B: |
| 1_Testes_ARID4B: 1184, 576   | in gene, in gene    | 1 | 18.000 | 2 | 1_Testes_ARID4B: |
| 1_Testes_ARID4B:             | 247 in gene         | 1 | 25.000 | 1 | 1_Testes_ARID4B: |
| 1_Testes_ARID4B:             | 247 in gene         | 1 | 35.000 | 1 | 1_Testes_ARID4B: |
| 1_Testes_ARID4B:             | 1499 in gene        | 1 | 24.000 | 1 | 1_Testes_ARID4B: |
| 1_Testes_ARID4B: 220751, 479 | downstream, in gene | 1 | 24.000 | 2 | 1_Testes_ARID4B: |
| 1_Testes_ARID4B:             | -4020 upstream      | 1 | 22.000 | 1 | 1_Testes_ARID4B: |
| 1_Testes_ARID4B:             | 3468 in gene        | 1 | 22.000 | 1 | 1_Testes_ARID4B: |
| 1_Testes_ARID4B:             | 1332 in gene        | 1 | 24.000 | 1 | 1_Testes_ARID4B: |
| 1_Testes_ARID4B:             | 1033 in gene        | 1 | 18.000 | 1 | 1_Testes_ARID4B: |
| 1_Testes_ARID4B:             | 148 in gene         | 1 | 30.000 | 1 | 1_Testes_ARID4B: |
| 1_Testes_ARID4B:             | 135 in gene         | 1 | 30.000 | 1 | 1_Testes_ARID4B: |
| 1_Testes_ARID4B:             | 257 in gene         | 1 | 35.000 | 1 | 1_Testes_ARID4B: |
| 1_Testes_ARID4B:             | -1633 upstream      | 1 | 35.000 | 1 | 1_Testes_ARID4B: |
| 1_Testes_ARID4B:             | -5675 upstream      | 1 | 28.000 | 1 | 1_Testes_ARID4B: |
| 1_Testes_ARID4B:             | 217 in gene         | 1 | 28.000 | 1 | 1_Testes_ARID4B: |
| 1_Testes_ARID4B:             | 1214 in gene        | 1 | 23.000 | 1 | 1_Testes_ARID4B: |
| 1_Testes_ARID4B:             | 539 in gene         | 1 | 31.000 | 1 | 1_Testes_ARID4B: |
| 1_Testes_ARID4B: 50, 37538   | in gene, downstream | 1 | 34.000 | 2 | 1_Testes_ARID4B: |
| 1_Testes_ARID4B: 66, -1806   | in gene, upstream   | 1 | 33.500 | 2 | 1_Testes_ARID4B: |
| 1_Testes_ARID4B: -1734, 138  | upstream, in gene   | 1 | 33.500 | 2 | 1_Testes_ARID4B: |
| 1_Testes_ARID4B:             | 68 in gene          | 1 | 23.000 | 1 | 1_Testes_ARID4B: |

|                                   |                        |   |        |   |                  |
|-----------------------------------|------------------------|---|--------|---|------------------|
| 1_Testes_ARID4B:                  | -9758 upstream         | 1 | 29.000 | 1 | 1_Testes_ARID4B: |
| 1_Testes_ARID4B:                  | 9649 downstream        | 1 | 29.000 | 1 | 1_Testes_ARID4B: |
| 1_Testes_ARID4B: 130, 15570       | in gene, downstream    | 1 | 33.000 | 2 | 1_Testes_ARID4B: |
| 1_Testes_ARID4B:                  | -317 upstream          | 1 | 37.000 | 1 | 1_Testes_ARID4B: |
| 1_Testes_ARID4B: 226, 13250       | in gene, downstream    | 1 | 47.000 | 2 | 1_Testes_ARID4B: |
| 1_Testes_ARID4B: 14045, 1021      | downstream, in gene    | 1 | 47.000 | 2 | 1_Testes_ARID4B: |
| 1_Testes_ARID4B:                  | 197 in gene            | 1 | 57.000 | 1 | 1_Testes_ARID4B: |
| 1_Testes_ARID4B:                  | 30782 downstream       | 1 | 57.000 | 1 | 1_Testes_ARID4B: |
| 1_Testes_ARID4B:                  | 237 in gene            | 1 | 18.000 | 1 | 1_Testes_ARID4B: |
| 1_Testes_ARID4B:                  | 375 in gene            | 1 | 34.000 | 1 | 1_Testes_ARID4B: |
| 1_Testes_ARID4B:                  | 170 in gene            | 1 | 35.000 | 1 | 1_Testes_ARID4B: |
| 1_Testes_ARID4B:                  | 180 in gene            | 1 | 30.000 | 1 | 1_Testes_ARID4B: |
| 1_Testes_ARID4B: 99004, 380       | downstream, in gene    | 1 | 26.500 | 2 | 1_Testes_ARID4B: |
| 1_Testes_ARID4B:                  | 43402 downstream       | 1 | 23.000 | 1 | 1_Testes_ARID4B: |
| 1_Testes_ARID4B:                  | 555 in gene            | 1 | 29.000 | 1 | 1_Testes_ARID4B: |
| 1_Testes_ARID4B:                  | -497 upstream          | 1 | 29.000 | 1 | 1_Testes_ARID4B: |
| 1_Testes_ARID4B:                  | 170 in gene            | 1 | 21.000 | 1 | 1_Testes_ARID4B: |
| 1_Testes_ARID4B:                  | 213 in gene            | 1 | 21.000 | 1 | 1_Testes_ARID4B: |
| 1_Testes_ARID4B:                  | 291 in gene            | 1 | 21.000 | 1 | 1_Testes_ARID4B: |
| 1_Testes_ARID4B:                  | -449 upstream          | 1 | 21.000 | 1 | 1_Testes_ARID4B: |
| 1_Testes_ARID4B:                  | 1150 in gene           | 1 | 26.000 | 1 | 1_Testes_ARID4B: |
| 1_Testes_ARID4B:                  | 38 in gene             | 1 | 34.000 | 1 | 1_Testes_ARID4B: |
| 1_Testes_ARID4B:                  | -369 upstream          | 1 | 42.000 | 1 | 1_Testes_ARID4B: |
| 1_Testes_ARID4B:                  | 225 in gene            | 1 | 42.000 | 1 | 1_Testes_ARID4B: |
| 1_Testes_ARID4B:                  | 291 in gene            | 1 | 31.000 | 1 | 1_Testes_ARID4B: |
| 1_Testes_ARID4B:                  | -464 upstream          | 1 | 31.000 | 1 | 1_Testes_ARID4B: |
| 1_Testes_ARID4B:                  | 324 in gene            | 1 | 23.000 | 1 | 1_Testes_ARID4B: |
| 1_Testes_ARID4B:                  | 11452 downstream       | 1 | 23.000 | 1 | 1_Testes_ARID4B: |
| 1_Testes_ARID4B:                  | 154 in gene            | 1 | 26.000 | 1 | 1_Testes_ARID4B: |
| 1_Testes_ARID4B:                  | 175 in gene            | 1 | 31.000 | 1 | 1_Testes_ARID4B: |
| 1_Testes_ARID4B: 14497, 321, -863 | downstream, in gene, u | 1 | 32.667 | 3 | 1_Testes_ARID4B: |
| 1_Testes_ARID4B: -847, 337        | upstream, in gene      | 1 | 33.500 | 2 | 1_Testes_ARID4B: |
| 1_Testes_ARID4B: -347, 549        | upstream, in gene      | 1 | 28.500 | 2 | 1_Testes_ARID4B: |
| 1_Testes_ARID4B:                  | -105 upstream          | 1 | 23.000 | 1 | 1_Testes_ARID4B: |
| 1_Testes_ARID4B:                  | -32 upstream           | 1 | 23.000 | 1 | 1_Testes_ARID4B: |
| 1_Testes_ARID4B:                  | 347 in gene            | 1 | 22.000 | 1 | 1_Testes_ARID4B: |
| 1_Testes_ARID4B:                  | -2435 upstream         | 1 | 22.000 | 1 | 1_Testes_ARID4B: |
| 1_Testes_ARID4B:                  | 335 in gene            | 1 | 22.000 | 1 | 1_Testes_ARID4B: |
| 1_Testes_ARID4B:                  | 229 in gene            | 1 | 28.000 | 1 | 1_Testes_ARID4B: |
| 1_Testes_ARID4B:                  | -2459 upstream         | 1 | 28.000 | 1 | 1_Testes_ARID4B: |
| 1_Testes_ARID4B:                  | 15700 downstream       | 1 | 22.000 | 1 | 1_Testes_ARID4B: |
| 1_Testes_ARID4B:                  | 174 in gene            | 1 | 22.000 | 1 | 1_Testes_ARID4B: |
| 1_Testes_ARID4B:                  | 392 in gene            | 1 | 24.000 | 1 | 1_Testes_ARID4B: |
| 1_Testes_ARID4B:                  | 209 in gene            | 1 | 26.000 | 1 | 1_Testes_ARID4B: |
| 1_Testes_ARID4B:                  | 146 in gene            | 1 | 29.000 | 1 | 1_Testes_ARID4B: |
| 1_Testes_ARID4B:                  | -1000 upstream         | 1 | 31.000 | 1 | 1_Testes_ARID4B: |
| 1_Testes_ARID4B:                  | 294 in gene            | 1 | 31.000 | 1 | 1_Testes_ARID4B: |

|                                      |                          |   |        |   |                  |
|--------------------------------------|--------------------------|---|--------|---|------------------|
| 1_Testes_ARID4B:                     | -1266 upstream           | 1 | 25.000 | 1 | 1_Testes_ARID4B: |
| 1_Testes_ARID4B:                     | 1072 in gene             | 1 | 25.000 | 1 | 1_Testes_ARID4B: |
| 1_Testes_ARID4B:                     | -164 upstream            | 1 | 18.000 | 1 | 1_Testes_ARID4B: |
| 1_Testes_ARID4B:                     | -184 upstream            | 1 | 18.000 | 1 | 1_Testes_ARID4B: |
| 1_Testes_ARID4B:                     | 371 in gene              | 1 | 23.000 | 1 | 1_Testes_ARID4B: |
| 1_Testes_ARID4B:                     | 168 in gene              | 1 | 19.000 | 1 | 1_Testes_ARID4B: |
| 1_Testes_ARID4B:                     | 904 in gene              | 1 | 26.000 | 1 | 1_Testes_ARID4B: |
| 1_Testes_ARID4B:                     | -383 upstream            | 1 | 36.000 | 1 | 1_Testes_ARID4B: |
| 1_Testes_ARID4B:                     | 514 in gene              | 1 | 18.000 | 1 | 1_Testes_ARID4B: |
| 1_Testes_ARID4B:                     | -67 upstream             | 1 | 24.000 | 1 | 1_Testes_ARID4B: |
| 1_Testes_ARID4B: 341, 60373          | in gene, downstream      | 1 | 26.500 | 2 | 1_Testes_ARID4B: |
| 1_Testes_ARID4B:                     | 134 in gene              | 1 | 29.000 | 1 | 1_Testes_ARID4B: |
| 1_Testes_ARID4B:                     | -86 upstream             | 1 | 31.000 | 1 | 1_Testes_ARID4B: |
| 1_Testes_ARID4B:                     | 19275 downstream         | 1 | 31.000 | 1 | 1_Testes_ARID4B: |
| 1_Testes_ARID4B: 2837, 1189, -2699   | in gene, in gene, upstre | 1 | 30.333 | 3 | 1_Testes_ARID4B: |
| 1_Testes_ARID4B: 22668, 21020, 17132 | downstream, downstre     | 1 | 30.333 | 3 | 1_Testes_ARID4B: |
| 1_Testes_ARID4B:                     | 691 in gene              | 1 | 30.000 | 1 | 1_Testes_ARID4B: |
| 1_Testes_ARID4B:                     | 1113 in gene             | 1 | 26.000 | 1 | 1_Testes_ARID4B: |
| 1_Testes_ARID4B:                     | 281 in gene              | 1 | 31.000 | 1 | 1_Testes_ARID4B: |
| 1_Testes_ARID4B: 11482, 12042        | downstream, downstre     | 1 | 19.500 | 2 | 1_Testes_ARID4B: |
| 1_Testes_ARID4B: -302, 258           | upstream, in gene        | 1 | 19.500 | 2 | 1_Testes_ARID4B: |
| 1_Testes_ARID4B:                     | 117 in gene              | 1 | 30.000 | 1 | 1_Testes_ARID4B: |
| 1_Testes_ARID4B: -471, 48553         | upstream, downstream     | 1 | 24.000 | 2 | 1_Testes_ARID4B: |
| 1_Testes_ARID4B:                     | 1184 in gene             | 1 | 18.000 | 1 | 1_Testes_ARID4B: |
| 1_Testes_ARID4B:                     | 167 in gene              | 1 | 18.000 | 1 | 1_Testes_ARID4B: |
| 1_Testes_ARID4B: 3115, 2187          | in gene, in gene         | 1 | 18.500 | 2 | 1_Testes_ARID4B: |
| 1_Testes_ARID4B:                     | 124 in gene              | 1 | 35.000 | 1 | 1_Testes_ARID4B: |
| 1_Testes_ARID4B:                     | -649 upstream            | 1 | 29.000 | 1 | 1_Testes_ARID4B: |
| 1_Testes_ARID4B:                     | 544 in gene              | 1 | 29.000 | 1 | 1_Testes_ARID4B: |
| 1_Testes_ARID4B:                     | 22031 downstream         | 1 | 29.000 | 1 | 1_Testes_ARID4B: |
| 1_Testes_ARID4B:                     | 264 in gene              | 1 | 23.000 | 1 | 1_Testes_ARID4B: |
| 1_Testes_ARID4B:                     | 482 in gene              | 1 | 29.000 | 1 | 1_Testes_ARID4B: |
| 1_Testes_ARID4B:                     | 192 in gene              | 1 | 24.000 | 1 | 1_Testes_ARID4B: |
| 1_Testes_ARID4B:                     | 440 in gene              | 1 | 27.000 | 1 | 1_Testes_ARID4B: |
| 1_Testes_ARID4B:                     | 91 in gene               | 1 | 22.000 | 1 | 1_Testes_ARID4B: |
| 1_Testes_ARID4B:                     | 55926 downstream         | 1 | 27.000 | 1 | 1_Testes_ARID4B: |
| 1_Testes_ARID4B:                     | -403 upstream            | 1 | 27.000 | 1 | 1_Testes_ARID4B: |
| 1_Testes_ARID4B: 33460, -3212        | in gene, upstream        | 1 | 39.500 | 2 | 1_Testes_ARID4B: |
| 1_Testes_ARID4B:                     | -37 upstream             | 1 | 47.000 | 1 | 1_Testes_ARID4B: |
| 1_Testes_ARID4B:                     | 784 in gene              | 1 | 47.000 | 1 | 1_Testes_ARID4B: |
| 1_Testes_ARID4B:                     | 203 in gene              | 1 | 32.000 | 1 | 1_Testes_ARID4B: |
| 1_Testes_ARID4B:                     | 466 in gene              | 1 | 16.000 | 1 | 1_Testes_ARID4B: |
| 1_Testes_ARID4B: 25665, 385          | in gene, in gene         | 1 | 28.000 | 2 | 1_Testes_ARID4B: |
| 1_Testes_ARID4B:                     | -5410 upstream           | 1 | 28.000 | 1 | 1_Testes_ARID4B: |
| 1_Testes_ARID4B:                     | -387 upstream            | 1 | 37.000 | 1 | 1_Testes_ARID4B: |
| 1_Testes_ARID4B:                     | 240 in gene              | 1 | 37.000 | 1 | 1_Testes_ARID4B: |
| 1_Testes_ARID4B: 405, -8299          | in gene, upstream        | 1 | 20.000 | 2 | 1_Testes_ARID4B: |



|                              |                      |   |        |   |                  |
|------------------------------|----------------------|---|--------|---|------------------|
| 1_Testes_ARID4B: -444, 8260  | upstream, in gene    | 1 | 20.000 | 2 | 1_Testes_ARID4B: |
| 1_Testes_ARID4B: -8576, 128  | upstream, in gene    | 1 | 20.000 | 2 | 1_Testes_ARID4B: |
| 1_Testes_ARID4B:             | 87 in gene           | 1 | 20.000 | 1 | 1_Testes_ARID4B: |
| 1_Testes_ARID4B:             | 623 in gene          | 1 | 23.000 | 1 | 1_Testes_ARID4B: |
| 1_Testes_ARID4B:             | 70 in gene           | 1 | 23.000 | 1 | 1_Testes_ARID4B: |
| 1_Testes_ARID4B:             | 303 in gene          | 1 | 28.000 | 1 | 1_Testes_ARID4B: |
| 1_Testes_ARID4B:             | -4577 upstream       | 1 | 33.000 | 1 | 1_Testes_ARID4B: |
| 1_Testes_ARID4B:             | 175 in gene          | 1 | 33.000 | 1 | 1_Testes_ARID4B: |
| 1_Testes_ARID4B:             | 258 in gene          | 1 | 21.000 | 1 | 1_Testes_ARID4B: |
| 1_Testes_ARID4B:             | 35613 downstream     | 1 | 21.000 | 1 | 1_Testes_ARID4B: |
| 1_Testes_ARID4B:             | 168 in gene          | 1 | 17.000 | 1 | 1_Testes_ARID4B: |
| 1_Testes_ARID4B:             | -343 upstream        | 1 | 21.000 | 1 | 1_Testes_ARID4B: |
| 1_Testes_ARID4B:             | 575 in gene          | 1 | 21.000 | 1 | 1_Testes_ARID4B: |
| 1_Testes_ARID4B:             | 325 in gene          | 1 | 18.000 | 1 | 1_Testes_ARID4B: |
| 1_Testes_ARID4B:             | 276 in gene          | 1 | 26.000 | 1 | 1_Testes_ARID4B: |
| 1_Testes_ARID4B:             | 158 in gene          | 1 | 48.000 | 1 | 1_Testes_ARID4B: |
| 1_Testes_ARID4B:             | 702 in gene          | 1 | 33.000 | 1 | 1_Testes_ARID4B: |
| 1_Testes_ARID4B:             | 35 in gene           | 1 | 33.000 | 1 | 1_Testes_ARID4B: |
| 1_Testes_ARID4B:             | 261 in gene          | 1 | 29.000 | 1 | 1_Testes_ARID4B: |
| 1_Testes_ARID4B:             | -372 upstream        | 1 | 29.000 | 1 | 1_Testes_ARID4B: |
| 1_Testes_ARID4B:             | -5088 upstream       | 1 | 18.000 | 1 | 1_Testes_ARID4B: |
| 1_Testes_ARID4B: 88070, 486  | downstream, in gene  | 1 | 21.000 | 2 | 1_Testes_ARID4B: |
| 1_Testes_ARID4B:             | 255 in gene          | 1 | 28.000 | 1 | 1_Testes_ARID4B: |
| 1_Testes_ARID4B:             | -5827 upstream       | 1 | 28.000 | 1 | 1_Testes_ARID4B: |
| 1_Testes_ARID4B:             | 433 in gene          | 1 | 28.000 | 1 | 1_Testes_ARID4B: |
| 1_Testes_ARID4B:             | -312 upstream        | 1 | 28.000 | 1 | 1_Testes_ARID4B: |
| 1_Testes_ARID4B:             | 28715 downstream     | 1 | 28.000 | 1 | 1_Testes_ARID4B: |
| 1_Testes_ARID4B:             | 57 in gene           | 1 | 27.000 | 1 | 1_Testes_ARID4B: |
| 1_Testes_ARID4B:             | 119 in gene          | 1 | 33.000 | 1 | 1_Testes_ARID4B: |
| 1_Testes_ARID4B:             | 7332 in gene         | 1 | 33.000 | 1 | 1_Testes_ARID4B: |
| 1_Testes_ARID4B:             | 3486 in gene         | 1 | 31.000 | 1 | 1_Testes_ARID4B: |
| 1_Testes_ARID4B:             | 121 in gene          | 1 | 33.000 | 1 | 1_Testes_ARID4B: |
| 1_Testes_ARID4B:             | -9441 upstream       | 1 | 33.000 | 1 | 1_Testes_ARID4B: |
| 1_Testes_ARID4B:             | 3060 in gene         | 1 | 18.000 | 1 | 1_Testes_ARID4B: |
| 1_Testes_ARID4B:             | 157 in gene          | 1 | 23.000 | 1 | 1_Testes_ARID4B: |
| 1_Testes_ARID4B:             | -9720 upstream       | 1 | 23.000 | 1 | 1_Testes_ARID4B: |
| 1_Testes_ARID4B:             | 204 in gene          | 1 | 19.000 | 1 | 1_Testes_ARID4B: |
| 1_Testes_ARID4B:             | 57754 in gene        | 1 | 32.000 | 1 | 1_Testes_ARID4B: |
| 1_Testes_ARID4B:             | 102 in gene          | 1 | 17.000 | 1 | 1_Testes_ARID4B: |
| 1_Testes_ARID4B:             | -1262 upstream       | 1 | 23.000 | 1 | 1_Testes_ARID4B: |
| 1_Testes_ARID4B: 189, 81373  | in gene, downstream  | 1 | 23.500 | 2 | 1_Testes_ARID4B: |
| 1_Testes_ARID4B:             | 1389 in gene         | 1 | 24.000 | 1 | 1_Testes_ARID4B: |
| 1_Testes_ARID4B:             | 166 in gene          | 1 | 27.000 | 1 | 1_Testes_ARID4B: |
| 1_Testes_ARID4B: -192, 11600 | upstream, downstream | 1 | 34.500 | 2 | 1_Testes_ARID4B: |
| 1_Testes_ARID4B:             | 27 in gene           | 1 | 51.000 | 1 | 1_Testes_ARID4B: |
| 1_Testes_ARID4B:             | 100 in gene          | 1 | 30.000 | 1 | 1_Testes_ARID4B: |
| 1_Testes_ARID4B:             | -361 upstream        | 1 | 33.000 | 1 | 1_Testes_ARID4B: |

|                             |                     |   |        |   |                  |
|-----------------------------|---------------------|---|--------|---|------------------|
| 1_Testes_ARID4B:            | -7551 upstream      | 1 | 33.000 | 1 | 1_Testes_ARID4B: |
| 1_Testes_ARID4B: 54358, 534 | downstream, in gene | 1 | 37.500 | 2 | 1_Testes_ARID4B: |
| 1_Testes_ARID4B:            | 717 in gene         | 1 | 42.000 | 1 | 1_Testes_ARID4B: |
| 1_Testes_ARID4B:            | -109 upstream       | 1 | 26.000 | 1 | 1_Testes_ARID4B: |
| 1_Testes_ARID4B:            | 613 in gene         | 1 | 26.000 | 1 | 1_Testes_ARID4B: |
| 1_Testes_ARID4B: 44963, 259 | downstream, in gene | 1 | 26.000 | 2 | 1_Testes_ARID4B: |
| 1_Testes_ARID4B:            | 222 in gene         | 1 | 23.000 | 1 | 1_Testes_ARID4B: |
| 1_Testes_ARID4B:            | 293 in gene         | 1 | 21.000 | 1 | 1_Testes_ARID4B: |
| 1_Testes_ARID4B:            | -366 upstream       | 1 | 28.000 | 1 | 1_Testes_ARID4B: |
| 1_Testes_ARID4B:            | -366 upstream       | 1 | 28.000 | 1 | 1_Testes_ARID4B: |
| 1_Testes_ARID4B:            | 201 in gene         | 1 | 28.000 | 1 | 1_Testes_ARID4B: |
| 1_Testes_ARID4B:            | 870 in gene         | 1 | 23.000 | 1 | 1_Testes_ARID4B: |
| 1_Testes_ARID4B:            | 37 in gene          | 1 | 19.000 | 1 | 1_Testes_ARID4B: |
| 1_Testes_ARID4B:            | 395 in gene         | 1 | 24.000 | 1 | 1_Testes_ARID4B: |
| 1_Testes_ARID4B:            | -8717 upstream      | 1 | 24.000 | 1 | 1_Testes_ARID4B: |
| 1_Testes_ARID4B:            | 676 in gene         | 1 | 22.000 | 1 | 1_Testes_ARID4B: |
| 1_Testes_ARID4B:            | -1928 upstream      | 1 | 22.000 | 1 | 1_Testes_ARID4B: |
| 1_Testes_ARID4B:            | 432 in gene         | 1 | 28.000 | 1 | 1_Testes_ARID4B: |
| 1_Testes_ARID4B:            | 96 in gene          | 1 | 20.000 | 1 | 1_Testes_ARID4B: |
| 1_Testes_ARID4B:            | 153 in gene         | 1 | 35.000 | 1 | 1_Testes_ARID4B: |
| 1_Testes_ARID4B:            | -264 upstream       | 1 | 35.000 | 1 | 1_Testes_ARID4B: |
| 1_Testes_ARID4B:            | 78370 downstream    | 1 | 25.000 | 1 | 1_Testes_ARID4B: |
| 1_Testes_ARID4B:            | -350 upstream       | 1 | 25.000 | 1 | 1_Testes_ARID4B: |
| 1_Testes_ARID4B:            | 22774 in gene       | 1 | 16.000 | 1 | 1_Testes_ARID4B: |
| 1_Testes_ARID4B:            | 8376 downstream     | 1 | 16.000 | 1 | 1_Testes_ARID4B: |
| 1_Testes_ARID4B:            | 580 in gene         | 1 | 22.000 | 1 | 1_Testes_ARID4B: |
| 1_Testes_ARID4B:            | -1034 upstream      | 1 | 22.000 | 1 | 1_Testes_ARID4B: |
| 1_Testes_ARID4B:            | 569 in gene         | 1 | 47.000 | 1 | 1_Testes_ARID4B: |
| 1_Testes_ARID4B:            | 12641 in gene       | 1 | 29.000 | 1 | 1_Testes_ARID4B: |
| 1_Testes_ARID4B:            | 290 in gene         | 1 | 24.000 | 1 | 1_Testes_ARID4B: |
| 1_Testes_ARID4B:            | 608 in gene         | 1 | 24.000 | 1 | 1_Testes_ARID4B: |
| 1_Testes_ARID4B: -735, 241  | upstream, in gene   | 1 | 35.000 | 2 | 1_Testes_ARID4B: |
| 1_Testes_ARID4B:            | 164 in gene         | 1 | 31.000 | 1 | 1_Testes_ARID4B: |
| 1_Testes_ARID4B:            | -1261 upstream      | 1 | 31.000 | 1 | 1_Testes_ARID4B: |
| 1_Testes_ARID4B:            | 139760 downstream   | 1 | 19.000 | 1 | 1_Testes_ARID4B: |
| 1_Testes_ARID4B:            | 34185 in gene       | 1 | 19.000 | 1 | 1_Testes_ARID4B: |
| 1_Testes_ARID4B:            | 857 in gene         | 1 | 21.000 | 1 | 1_Testes_ARID4B: |
| 1_Testes_ARID4B:            | -331 upstream       | 1 | 35.000 | 1 | 1_Testes_ARID4B: |
| 1_Testes_ARID4B:            | -8308 upstream      | 1 | 41.000 | 1 | 1_Testes_ARID4B: |
| 1_Testes_ARID4B:            | 10226 downstream    | 1 | 41.000 | 1 | 1_Testes_ARID4B: |
| 1_Testes_ARID4B:            | 205 in gene         | 1 | 41.000 | 1 | 1_Testes_ARID4B: |
| 1_Testes_ARID4B:            | 267 in gene         | 1 | 34.000 | 1 | 1_Testes_ARID4B: |
| 1_Testes_ARID4B:            | -9397 upstream      | 1 | 24.000 | 1 | 1_Testes_ARID4B: |
| 1_Testes_ARID4B:            | 57 in gene          | 1 | 24.000 | 1 | 1_Testes_ARID4B: |
| 1_Testes_ARID4B:            | 8618 downstream     | 1 | 24.000 | 1 | 1_Testes_ARID4B: |
| 1_Testes_ARID4B:            | 89584 downstream    | 1 | 24.000 | 1 | 1_Testes_ARID4B: |
| 1_Testes_ARID4B:            | 173 in gene         | 1 | 24.000 | 1 | 1_Testes_ARID4B: |

|                                         |                         |          |                    |
|-----------------------------------------|-------------------------|----------|--------------------|
| 1_Testes_ARID4B: -1222, 138             | upstream, in gene       | 1 22.500 | 2 1_Testes_ARID4B: |
| 1_Testes_ARID4B: 484, 108124            | in gene, downstream     | 1 19.500 | 2 1_Testes_ARID4B: |
| 1_Testes_ARID4B:                        | 3561 in gene            | 1 22.000 | 1 1_Testes_ARID4B: |
| 1_Testes_ARID4B:                        | -10087 upstream         | 1 22.000 | 1 1_Testes_ARID4B: |
| 1_Testes_ARID4B:                        | 550 in gene             | 1 47.000 | 1 1_Testes_ARID4B: |
| 1_Testes_ARID4B:                        | 191 in gene             | 1 27.000 | 1 1_Testes_ARID4B: |
| 1_Testes_ARID4B:                        | 875 in gene             | 1 43.000 | 1 1_Testes_ARID4B: |
| 1_Testes_ARID4B:                        | -1970 upstream          | 1 43.000 | 1 1_Testes_ARID4B: |
| 1_Testes_ARID4B:                        | -734 upstream           | 1 41.000 | 1 1_Testes_ARID4B: |
| 1_Testes_ARID4B:                        | 626 in gene             | 1 41.000 | 1 1_Testes_ARID4B: |
| 1_Testes_ARID4B: 210, -5838             | in gene, upstream       | 1 48.500 | 2 1_Testes_ARID4B: |
| 1_Testes_ARID4B: -5977, 71              | upstream, in gene       | 1 48.500 | 2 1_Testes_ARID4B: |
| 1_Testes_ARID4B:                        | 45771 downstream        | 1 26.000 | 1 1_Testes_ARID4B: |
| 1_Testes_ARID4B: 191, 55551             | in gene, downstream     | 1 29.500 | 2 1_Testes_ARID4B: |
| 1_Testes_ARID4B:                        | -559 upstream           | 1 33.000 | 1 1_Testes_ARID4B: |
| 1_Testes_ARID4B:                        | 230 in gene             | 1 33.000 | 1 1_Testes_ARID4B: |
| 1_Testes_ARID4B:                        | -361 upstream           | 1 28.000 | 1 1_Testes_ARID4B: |
| 1_Testes_ARID4B:                        | 128 in gene             | 1 30.000 | 1 1_Testes_ARID4B: |
| 1_Testes_ARID4B:                        | 560 in gene             | 1 17.000 | 1 1_Testes_ARID4B: |
| 1_Testes_ARID4B:                        | 24881 downstream        | 1 33.000 | 1 1_Testes_ARID4B: |
| 1_Testes_ARID4B: 100, 11956             | in gene, downstream     | 1 26.000 | 2 1_Testes_ARID4B: |
| 1_Testes_ARID4B: 29348, 17492, 612, -50 | downstream, in gene, in | 1 26.750 | 4 1_Testes_ARID4B: |
| 1_Testes_ARID4B: -5176, 488             | upstream, in gene       | 1 27.500 | 2 1_Testes_ARID4B: |
| 1_Testes_ARID4B: 386, 23442             | in gene, in gene        | 1 19.500 | 2 1_Testes_ARID4B: |
| 1_Testes_ARID4B:                        | -6610 upstream          | 1 30.000 | 1 1_Testes_ARID4B: |
| 1_Testes_ARID4B:                        | 161 in gene             | 1 30.000 | 1 1_Testes_ARID4B: |
| 1_Testes_ARID4B:                        | 301 in gene             | 1 36.000 | 1 1_Testes_ARID4B: |
| 1_Testes_ARID4B:                        | 439 in gene             | 1 24.000 | 1 1_Testes_ARID4B: |
| 1_Testes_ARID4B: 13062, -8202           | downstream, upstream    | 1 22.000 | 2 1_Testes_ARID4B: |
| 1_Testes_ARID4B: 50301, 23853, 397      | downstream, in gene, in | 1 25.000 | 3 1_Testes_ARID4B: |
| 1_Testes_ARID4B:                        | 286 in gene             | 1 27.000 | 1 1_Testes_ARID4B: |
| 1_Testes_ARID4B: -364, 404              | upstream, in gene       | 1 24.000 | 2 1_Testes_ARID4B: |
| 1_Testes_ARID4B:                        | 42362 downstream        | 1 25.000 | 1 1_Testes_ARID4B: |
| 1_Testes_ARID4B:                        | 404 in gene             | 1 25.000 | 1 1_Testes_ARID4B: |
| 1_Testes_ARID4B:                        | 2001 in gene            | 1 27.000 | 1 1_Testes_ARID4B: |
| 1_Testes_ARID4B:                        | 116 in gene             | 1 25.000 | 1 1_Testes_ARID4B: |
| 1_Testes_ARID4B:                        | 75 in gene              | 1 19.000 | 1 1_Testes_ARID4B: |
| 1_Testes_ARID4B:                        | -544 upstream           | 1 19.000 | 1 1_Testes_ARID4B: |
| 1_Testes_ARID4B:                        | 3239 in gene            | 1 18.000 | 1 1_Testes_ARID4B: |
| 1_Testes_ARID4B:                        | 197 in gene             | 1 21.000 | 1 1_Testes_ARID4B: |
| 1_Testes_ARID4B:                        | 372 in gene             | 1 38.000 | 1 1_Testes_ARID4B: |
| 1_Testes_ARID4B:                        | 76 in gene              | 1 23.000 | 1 1_Testes_ARID4B: |
| 1_Testes_ARID4B:                        | 495 in gene             | 1 25.000 | 1 1_Testes_ARID4B: |
| 1_Testes_ARID4B: 1442, 130              | in gene, in gene        | 1 28.500 | 2 1_Testes_ARID4B: |
| 1_Testes_ARID4B:                        | 1 in gene               | 1 19.000 | 1 1_Testes_ARID4B: |
| 1_Testes_ARID4B:                        | 2727 downstream         | 1 19.000 | 1 1_Testes_ARID4B: |
| 1_Testes_ARID4B:                        | 375 in gene             | 1 25.000 | 1 1_Testes_ARID4B: |

|                               |                      |   |        |   |                  |
|-------------------------------|----------------------|---|--------|---|------------------|
| 1_Testes_ARID4B:              | 730 in gene          | 1 | 21.000 | 1 | 1_Testes_ARID4B: |
| 1_Testes_ARID4B:              | -323 upstream        | 1 | 23.000 | 1 | 1_Testes_ARID4B: |
| 1_Testes_ARID4B:              | 118 in gene          | 1 | 23.000 | 1 | 1_Testes_ARID4B: |
| 1_Testes_ARID4B:              | 357 in gene          | 1 | 24.000 | 1 | 1_Testes_ARID4B: |
| 1_Testes_ARID4B: -2507, 3029  | upstream, in gene    | 1 | 21.500 | 2 | 1_Testes_ARID4B: |
| 1_Testes_ARID4B:              | 1289 in gene         | 1 | 33.000 | 1 | 1_Testes_ARID4B: |
| 1_Testes_ARID4B:              | 88 in gene           | 1 | 23.000 | 1 | 1_Testes_ARID4B: |
| 1_Testes_ARID4B:              | -3658 upstream       | 1 | 17.000 | 1 | 1_Testes_ARID4B: |
| 1_Testes_ARID4B:              | 313 in gene          | 1 | 17.000 | 1 | 1_Testes_ARID4B: |
| 1_Testes_ARID4B:              | 117 in gene          | 1 | 31.000 | 1 | 1_Testes_ARID4B: |
| 1_Testes_ARID4B:              | 613 in gene          | 1 | 40.000 | 1 | 1_Testes_ARID4B: |
| 1_Testes_ARID4B:              | 266 in gene          | 1 | 28.000 | 1 | 1_Testes_ARID4B: |
| 1_Testes_ARID4B:              | 7179 downstream      | 1 | 28.000 | 1 | 1_Testes_ARID4B: |
| 1_Testes_ARID4B:              | 218 in gene          | 1 | 19.000 | 1 | 1_Testes_ARID4B: |
| 1_Testes_ARID4B:              | 3061 downstream      | 1 | 19.000 | 1 | 1_Testes_ARID4B: |
| 1_Testes_ARID4B:              | 6882 downstream      | 1 | 19.000 | 1 | 1_Testes_ARID4B: |
| 1_Testes_ARID4B:              | -7152 upstream       | 1 | 19.000 | 1 | 1_Testes_ARID4B: |
| 1_Testes_ARID4B:              | -170 upstream        | 1 | 34.000 | 1 | 1_Testes_ARID4B: |
| 1_Testes_ARID4B:              | -281 upstream        | 1 | 31.000 | 1 | 1_Testes_ARID4B: |
| 1_Testes_ARID4B:              | -383 upstream        | 1 | 36.000 | 1 | 1_Testes_ARID4B: |
| 1_Testes_ARID4B:              | 213 in gene          | 1 | 36.000 | 1 | 1_Testes_ARID4B: |
| 1_Testes_ARID4B: 1618, -5918  | in gene, upstream    | 1 | 33.000 | 2 | 1_Testes_ARID4B: |
| 1_Testes_ARID4B:              | 831 in gene          | 1 | 37.000 | 1 | 1_Testes_ARID4B: |
| 1_Testes_ARID4B:              | 150 in gene          | 1 | 25.000 | 1 | 1_Testes_ARID4B: |
| 1_Testes_ARID4B:              | 228 in gene          | 1 | 29.000 | 1 | 1_Testes_ARID4B: |
| 1_Testes_ARID4B: 81, 1542     | in gene, in gene     | 1 | 18.500 | 2 | 1_Testes_ARID4B: |
| 1_Testes_ARID4B: 24262, 22801 | downstream, downstre | 1 | 18.500 | 2 | 1_Testes_ARID4B: |
| 1_Testes_ARID4B:              | 520 in gene          | 1 | 21.000 | 1 | 1_Testes_ARID4B: |
| 1_Testes_ARID4B:              | 1722 in gene         | 1 | 24.000 | 1 | 1_Testes_ARID4B: |
| 1_Testes_ARID4B:              | -2794 upstream       | 1 | 24.000 | 1 | 1_Testes_ARID4B: |
| 1_Testes_ARID4B:              | 67146 in gene        | 1 | 21.000 | 1 | 1_Testes_ARID4B: |
| 1_Testes_ARID4B:              | -384 upstream        | 1 | 21.000 | 1 | 1_Testes_ARID4B: |
| 1_Testes_ARID4B:              | 40343 downstream     | 1 | 22.000 | 1 | 1_Testes_ARID4B: |
| 1_Testes_ARID4B:              | 24 in gene           | 1 | 22.000 | 1 | 1_Testes_ARID4B: |
| 1_Testes_ARID4B:              | 35288 downstream     | 1 | 22.000 | 1 | 1_Testes_ARID4B: |
| 1_Testes_ARID4B:              | 377 in gene          | 1 | 28.000 | 1 | 1_Testes_ARID4B: |
| 1_Testes_ARID4B:              | -619 upstream        | 1 | 28.000 | 1 | 1_Testes_ARID4B: |
| 1_Testes_ARID4B:              | 298 in gene          | 1 | 48.000 | 1 | 1_Testes_ARID4B: |
| 1_Testes_ARID4B: 81130, 82282 | in gene, in gene     | 1 | 29.000 | 2 | 1_Testes_ARID4B: |
| 1_Testes_ARID4B:              | -339 upstream        | 1 | 40.000 | 1 | 1_Testes_ARID4B: |
| 1_Testes_ARID4B:              | 285 in gene          | 1 | 40.000 | 1 | 1_Testes_ARID4B: |
| 1_Testes_ARID4B: 1210, 105690 | in gene, in gene     | 1 | 22.500 | 2 | 1_Testes_ARID4B: |
| 1_Testes_ARID4B:              | 142 in gene          | 1 | 28.000 | 1 | 1_Testes_ARID4B: |
| 1_Testes_ARID4B:              | -247 upstream        | 1 | 20.000 | 1 | 1_Testes_ARID4B: |
| 1_Testes_ARID4B:              | 195 in gene          | 1 | 20.000 | 1 | 1_Testes_ARID4B: |
| 1_Testes_ARID4B:              | 98 in gene           | 1 | 22.000 | 1 | 1_Testes_ARID4B: |
| 1_Testes_ARID4B: -468, 492    | upstream, in gene    | 1 | 22.000 | 2 | 1_Testes_ARID4B: |

|                              |                     |   |        |   |                  |
|------------------------------|---------------------|---|--------|---|------------------|
| 1_Testes_ARID4B:             | 236 in gene         | 1 | 26.000 | 1 | 1_Testes_ARID4B: |
| 1_Testes_ARID4B:             | 276 in gene         | 1 | 37.000 | 1 | 1_Testes_ARID4B: |
| 1_Testes_ARID4B:             | 512 in gene         | 1 | 18.000 | 1 | 1_Testes_ARID4B: |
| 1_Testes_ARID4B:             | 2383 in gene        | 1 | 20.000 | 1 | 1_Testes_ARID4B: |
| 1_Testes_ARID4B:             | 15470 downstream    | 1 | 19.000 | 1 | 1_Testes_ARID4B: |
| 1_Testes_ARID4B:             | 230 in gene         | 1 | 19.000 | 1 | 1_Testes_ARID4B: |
| 1_Testes_ARID4B:             | 63226 downstream    | 1 | 19.000 | 1 | 1_Testes_ARID4B: |
| 1_Testes_ARID4B:             | 403 in gene         | 1 | 25.000 | 1 | 1_Testes_ARID4B: |
| 1_Testes_ARID4B: -2357, 395  | upstream, in gene   | 1 | 23.500 | 2 | 1_Testes_ARID4B: |
| 1_Testes_ARID4B:             | 588 in gene         | 1 | 33.000 | 1 | 1_Testes_ARID4B: |
| 1_Testes_ARID4B:             | 32929 downstream    | 1 | 28.000 | 1 | 1_Testes_ARID4B: |
| 1_Testes_ARID4B:             | 88 in gene          | 1 | 28.000 | 1 | 1_Testes_ARID4B: |
| 1_Testes_ARID4B: 82509, 589  | downstream, in gene | 1 | 25.500 | 2 | 1_Testes_ARID4B: |
| 1_Testes_ARID4B:             | 272 in gene         | 1 | 38.000 | 1 | 1_Testes_ARID4B: |
| 1_Testes_ARID4B:             | 210 in gene         | 1 | 31.000 | 1 | 1_Testes_ARID4B: |
| 1_Testes_ARID4B:             | 735 in gene         | 1 | 31.000 | 1 | 1_Testes_ARID4B: |
| 1_Testes_ARID4B:             | -1003 upstream      | 1 | 31.000 | 1 | 1_Testes_ARID4B: |
| 1_Testes_ARID4B:             | 334 in gene         | 1 | 20.000 | 1 | 1_Testes_ARID4B: |
| 1_Testes_ARID4B: 57993, 265  | downstream, in gene | 1 | 30.000 | 2 | 1_Testes_ARID4B: |
| 1_Testes_ARID4B:             | -394 upstream       | 1 | 30.000 | 1 | 1_Testes_ARID4B: |
| 1_Testes_ARID4B:             | -463 upstream       | 1 | 32.000 | 1 | 1_Testes_ARID4B: |
| 1_Testes_ARID4B:             | 181 in gene         | 1 | 32.000 | 1 | 1_Testes_ARID4B: |
| 1_Testes_ARID4B: 35107, 1139 | in gene, in gene    | 1 | 22.500 | 2 | 1_Testes_ARID4B: |
| 1_Testes_ARID4B:             | 397 in gene         | 1 | 21.000 | 1 | 1_Testes_ARID4B: |
| 1_Testes_ARID4B:             | 12060 downstream    | 1 | 21.000 | 1 | 1_Testes_ARID4B: |
| 1_Testes_ARID4B: 244, -652   | in gene, upstream   | 1 | 34.500 | 2 | 1_Testes_ARID4B: |
| 1_Testes_ARID4B: -528, 368   | upstream, in gene   | 1 | 34.500 | 2 | 1_Testes_ARID4B: |
| 1_Testes_ARID4B:             | 26 in gene          | 1 | 23.000 | 1 | 1_Testes_ARID4B: |
| 1_Testes_ARID4B:             | 41651 in gene       | 1 | 17.000 | 1 | 1_Testes_ARID4B: |
| 1_Testes_ARID4B:             | 289 in gene         | 1 | 26.000 | 1 | 1_Testes_ARID4B: |
| 1_Testes_ARID4B:             | 91 in gene          | 1 | 26.000 | 1 | 1_Testes_ARID4B: |
| 1_Testes_ARID4B:             | -710 upstream       | 1 | 26.000 | 1 | 1_Testes_ARID4B: |
| 1_Testes_ARID4B:             | 139 in gene         | 1 | 34.000 | 1 | 1_Testes_ARID4B: |
| 1_Testes_ARID4B:             | -249 upstream       | 1 | 25.000 | 1 | 1_Testes_ARID4B: |
| 1_Testes_ARID4B:             | 78 in gene          | 1 | 25.000 | 1 | 1_Testes_ARID4B: |
| 1_Testes_ARID4B: 240, 6672   | in gene, downstream | 1 | 26.000 | 2 | 1_Testes_ARID4B: |
| 1_Testes_ARID4B: -6242, 190  | upstream, in gene   | 1 | 26.000 | 2 | 1_Testes_ARID4B: |
| 1_Testes_ARID4B:             | 1549 in gene        | 1 | 27.000 | 1 | 1_Testes_ARID4B: |
| 1_Testes_ARID4B:             | 237 in gene         | 1 | 27.000 | 1 | 1_Testes_ARID4B: |
| 1_Testes_ARID4B: 484, -337   | in gene, upstream   | 1 | 25.000 | 2 | 1_Testes_ARID4B: |
| 1_Testes_ARID4B:             | 317 in gene         | 1 | 41.000 | 1 | 1_Testes_ARID4B: |
| 1_Testes_ARID4B:             | 236 in gene         | 1 | 21.000 | 1 | 1_Testes_ARID4B: |
| 1_Testes_ARID4B:             | 232 in gene         | 1 | 37.000 | 1 | 1_Testes_ARID4B: |
| 1_Testes_ARID4B:             | -4007 upstream      | 1 | 31.000 | 1 | 1_Testes_ARID4B: |
| 1_Testes_ARID4B:             | 291 in gene         | 1 | 31.000 | 1 | 1_Testes_ARID4B: |
| 1_Testes_ARID4B:             | -9642 upstream      | 1 | 36.000 | 1 | 1_Testes_ARID4B: |
| 1_Testes_ARID4B:             | 11 in gene          | 1 | 36.000 | 1 | 1_Testes_ARID4B: |

|                                     |       |                          |   |        |   |                  |
|-------------------------------------|-------|--------------------------|---|--------|---|------------------|
| 1_Testes_ARID4B:                    | 15050 | downstream               | 1 | 36.000 | 1 | 1_Testes_ARID4B: |
| 1_Testes_ARID4B:                    | 104   | in gene                  | 1 | 30.000 | 1 | 1_Testes_ARID4B: |
| 1_Testes_ARID4B: 6504, 232          |       | in gene, in gene         | 1 | 37.500 | 2 | 1_Testes_ARID4B: |
| 1_Testes_ARID4B:                    | -7735 | upstream                 | 1 | 34.000 | 1 | 1_Testes_ARID4B: |
| 1_Testes_ARID4B:                    | -600  | upstream                 | 1 | 16.000 | 1 | 1_Testes_ARID4B: |
| 1_Testes_ARID4B:                    | 30    | in gene                  | 1 | 19.000 | 1 | 1_Testes_ARID4B: |
| 1_Testes_ARID4B: 970, 2698, 112362  |       | in gene, in gene, downst | 1 | 26.333 | 3 | 1_Testes_ARID4B: |
| 1_Testes_ARID4B: -164, -7524, -8004 |       | upstream, upstream, up   | 1 | 26.000 | 3 | 1_Testes_ARID4B: |
| 1_Testes_ARID4B: 89, 7449, 7929     |       | in gene, downstream, c   | 1 | 26.000 | 3 | 1_Testes_ARID4B: |
| 1_Testes_ARID4B: 7586, 226, -254    |       | downstream, in gene, u   | 1 | 26.000 | 3 | 1_Testes_ARID4B: |
| 1_Testes_ARID4B:                    | 19338 | downstream               | 1 | 24.000 | 1 | 1_Testes_ARID4B: |
| 1_Testes_ARID4B: 405, 8181          |       | in gene, in gene         | 1 | 28.500 | 2 | 1_Testes_ARID4B: |
| 1_Testes_ARID4B: 23404, 15628, 556  |       | downstream, downstre     | 1 | 30.000 | 3 | 1_Testes_ARID4B: |
| 1_Testes_ARID4B: 25919, 95          |       | downstream, in gene      | 1 | 44.000 | 2 | 1_Testes_ARID4B: |
| 1_Testes_ARID4B:                    | 15194 | downstream               | 1 | 55.000 | 1 | 1_Testes_ARID4B: |
| 1_Testes_ARID4B:                    | 3825  | in gene                  | 1 | 19.000 | 1 | 1_Testes_ARID4B: |
| 1_Testes_ARID4B:                    | -3151 | upstream                 | 1 | 19.000 | 1 | 1_Testes_ARID4B: |
| 1_Testes_ARID4B:                    | 12227 | downstream               | 1 | 26.000 | 1 | 1_Testes_ARID4B: |
| 1_Testes_ARID4B:                    | 205   | in gene                  | 1 | 26.000 | 1 | 1_Testes_ARID4B: |
| 1_Testes_ARID4B:                    | 508   | in gene                  | 1 | 22.000 | 1 | 1_Testes_ARID4B: |
| 1_Testes_ARID4B: 70, 12582          |       | in gene, downstream      | 1 | 28.500 | 2 | 1_Testes_ARID4B: |
| 1_Testes_ARID4B:                    | -136  | upstream                 | 1 | 28.000 | 1 | 1_Testes_ARID4B: |
| 1_Testes_ARID4B: 5889, 5281         |       | in gene, in gene         | 1 | 19.000 | 2 | 1_Testes_ARID4B: |
| 1_Testes_ARID4B: 574, -2            |       | in gene, upstream        | 1 | 23.500 | 2 | 1_Testes_ARID4B: |
| 1_Testes_ARID4B:                    | 428   | in gene                  | 1 | 47.000 | 1 | 1_Testes_ARID4B: |
| 1_Testes_ARID4B:                    | 69    | in gene                  | 1 | 36.000 | 1 | 1_Testes_ARID4B: |
| 1_Testes_ARID4B:                    | -356  | upstream                 | 1 | 26.000 | 1 | 1_Testes_ARID4B: |
| 1_Testes_ARID4B:                    | 169   | in gene                  | 1 | 38.000 | 1 | 1_Testes_ARID4B: |
| 1_Testes_ARID4B: 17460, 393         |       | downstream, in gene      | 1 | 36.000 | 2 | 1_Testes_ARID4B: |
| 1_Testes_ARID4B: 7830, -9237        |       | downstream, upstream     | 1 | 36.000 | 2 | 1_Testes_ARID4B: |
| 1_Testes_ARID4B:                    | -125  | upstream                 | 1 | 34.000 | 1 | 1_Testes_ARID4B: |
| 1_Testes_ARID4B:                    | -537  | upstream                 | 1 | 25.000 | 1 | 1_Testes_ARID4B: |
| 1_Testes_ARID4B:                    | 427   | in gene                  | 1 | 25.000 | 1 | 1_Testes_ARID4B: |
| 1_Testes_ARID4B:                    | 56    | in gene                  | 1 | 23.000 | 1 | 1_Testes_ARID4B: |
| 1_Testes_ARID4B:                    | 107   | in gene                  | 1 | 24.000 | 1 | 1_Testes_ARID4B: |
| 1_Testes_ARID4B:                    | 1343  | in gene                  | 1 | 55.000 | 1 | 1_Testes_ARID4B: |
| 1_Testes_ARID4B: 1136, -7120        |       | in gene, upstream        | 1 | 36.000 | 2 | 1_Testes_ARID4B: |
| 1_Testes_ARID4B: 191, -9073         |       | in gene, upstream        | 1 | 33.500 | 2 | 1_Testes_ARID4B: |
| 1_Testes_ARID4B: -8858, 406         |       | upstream, in gene        | 1 | 33.500 | 2 | 1_Testes_ARID4B: |
| 1_Testes_ARID4B:                    | 28    | in gene                  | 1 | 21.000 | 1 | 1_Testes_ARID4B: |
| 1_Testes_ARID4B:                    | 26260 | downstream               | 1 | 21.000 | 1 | 1_Testes_ARID4B: |
| 1_Testes_ARID4B:                    | 374   | in gene                  | 1 | 22.000 | 1 | 1_Testes_ARID4B: |
| 1_Testes_ARID4B:                    | 370   | in gene                  | 1 | 33.000 | 1 | 1_Testes_ARID4B: |
| 1_Testes_ARID4B:                    | 262   | in gene                  | 1 | 18.000 | 1 | 1_Testes_ARID4B: |
| 1_Testes_ARID4B:                    | -112  | upstream                 | 1 | 28.000 | 1 | 1_Testes_ARID4B: |
| 1_Testes_ARID4B:                    | 354   | in gene                  | 1 | 28.000 | 1 | 1_Testes_ARID4B: |
| 1_Testes_ARID4B:                    | 554   | in gene                  | 1 | 26.000 | 1 | 1_Testes_ARID4B: |

|                              |                      |   |        |   |                  |
|------------------------------|----------------------|---|--------|---|------------------|
| 1_Testes_ARID4B:             | 136 in gene          | 1 | 40.000 | 1 | 1_Testes_ARID4B: |
| 1_Testes_ARID4B:             | 10289 downstream     | 1 | 40.000 | 1 | 1_Testes_ARID4B: |
| 1_Testes_ARID4B:             | 409 in gene          | 1 | 20.000 | 1 | 1_Testes_ARID4B: |
| 1_Testes_ARID4B:             | 134 in gene          | 1 | 25.000 | 1 | 1_Testes_ARID4B: |
| 1_Testes_ARID4B:             | -73 upstream         | 1 | 19.000 | 1 | 1_Testes_ARID4B: |
| 1_Testes_ARID4B:             | 10556 downstream     | 1 | 27.000 | 1 | 1_Testes_ARID4B: |
| 1_Testes_ARID4B:             | 98 in gene           | 1 | 27.000 | 1 | 1_Testes_ARID4B: |
| 1_Testes_ARID4B:             | -2625 upstream       | 1 | 27.000 | 1 | 1_Testes_ARID4B: |
| 1_Testes_ARID4B:             | -87 upstream         | 1 | 21.000 | 1 | 1_Testes_ARID4B: |
| 1_Testes_ARID4B:             | -50 upstream         | 1 | 25.000 | 1 | 1_Testes_ARID4B: |
| 1_Testes_ARID4B:             | 191 in gene          | 1 | 32.000 | 1 | 1_Testes_ARID4B: |
| 1_Testes_ARID4B:             | 103 in gene          | 1 | 37.000 | 1 | 1_Testes_ARID4B: |
| 1_Testes_ARID4B:             | -174 upstream        | 1 | 37.000 | 1 | 1_Testes_ARID4B: |
| 1_Testes_ARID4B:             | 149 in gene          | 1 | 20.000 | 1 | 1_Testes_ARID4B: |
| 1_Testes_ARID4B:             | 64 in gene           | 1 | 30.000 | 1 | 1_Testes_ARID4B: |
| 1_Testes_ARID4B:             | -141 upstream        | 1 | 30.000 | 1 | 1_Testes_ARID4B: |
| 1_Testes_ARID4B:             | 13824 downstream     | 1 | 30.000 | 1 | 1_Testes_ARID4B: |
| 1_Testes_ARID4B:             | 48 in gene           | 1 | 25.000 | 1 | 1_Testes_ARID4B: |
| 1_Testes_ARID4B:             | 244 in gene          | 1 | 17.000 | 1 | 1_Testes_ARID4B: |
| 1_Testes_ARID4B:             | 336 in gene          | 1 | 26.000 | 1 | 1_Testes_ARID4B: |
| 1_Testes_ARID4B:             | 140 in gene          | 1 | 27.000 | 1 | 1_Testes_ARID4B: |
| 1_Testes_ARID4B:             | -208 upstream        | 1 | 27.000 | 1 | 1_Testes_ARID4B: |
| 1_Testes_ARID4B:             | 454830 in gene       | 1 | 23.000 | 1 | 1_Testes_ARID4B: |
| 1_Testes_ARID4B:             | 2338 in gene         | 1 | 29.000 | 1 | 1_Testes_ARID4B: |
| 1_Testes_ARID4B:             | -219 upstream        | 1 | 24.000 | 1 | 1_Testes_ARID4B: |
| 1_Testes_ARID4B:             | -185 upstream        | 1 | 24.000 | 1 | 1_Testes_ARID4B: |
| 1_Testes_ARID4B:             | 107 in gene          | 1 | 29.000 | 1 | 1_Testes_ARID4B: |
| 1_Testes_ARID4B:             | 409 in gene          | 1 | 19.000 | 1 | 1_Testes_ARID4B: |
| 1_Testes_ARID4B:             | -152 upstream        | 1 | 24.000 | 1 | 1_Testes_ARID4B: |
| 1_Testes_ARID4B:             | 93 in gene           | 1 | 24.000 | 1 | 1_Testes_ARID4B: |
| 1_Testes_ARID4B: 55, 967     | in gene, in gene     | 1 | 27.500 | 2 | 1_Testes_ARID4B: |
| 1_Testes_ARID4B:             | 192 in gene          | 1 | 23.000 | 1 | 1_Testes_ARID4B: |
| 1_Testes_ARID4B:             | 54 in gene           | 1 | 30.000 | 1 | 1_Testes_ARID4B: |
| 1_Testes_ARID4B:             | 895 in gene          | 1 | 21.000 | 1 | 1_Testes_ARID4B: |
| 1_Testes_ARID4B:             | 138 in gene          | 1 | 25.000 | 1 | 1_Testes_ARID4B: |
| 1_Testes_ARID4B:             | 110 in gene          | 1 | 29.000 | 1 | 1_Testes_ARID4B: |
| 1_Testes_ARID4B:             | 205 in gene          | 1 | 22.000 | 1 | 1_Testes_ARID4B: |
| 1_Testes_ARID4B:             | -703 upstream        | 1 | 39.000 | 1 | 1_Testes_ARID4B: |
| 1_Testes_ARID4B:             | 1088 in gene         | 1 | 36.000 | 1 | 1_Testes_ARID4B: |
| 1_Testes_ARID4B:             | 353 in gene          | 1 | 26.000 | 1 | 1_Testes_ARID4B: |
| 1_Testes_ARID4B:             | 65 in gene           | 1 | 20.000 | 1 | 1_Testes_ARID4B: |
| 1_Testes_ARID4B:             | -117 upstream        | 1 | 22.000 | 1 | 1_Testes_ARID4B: |
| 1_Testes_ARID4B:             | 80 in gene           | 1 | 22.000 | 1 | 1_Testes_ARID4B: |
| 1_Testes_ARID4B:             | 81 in gene           | 1 | 24.000 | 1 | 1_Testes_ARID4B: |
| 1_Testes_ARID4B:             | 24 in gene           | 1 | 23.000 | 1 | 1_Testes_ARID4B: |
| 1_Testes_ARID4B: 11, 11275   | in gene, in gene     | 1 | 19.000 | 2 | 1_Testes_ARID4B: |
| 1_Testes_ARID4B: -5332, 5932 | upstream, downstream | 1 | 19.000 | 2 | 1_Testes_ARID4B: |

|                              |                      |   |        |   |                  |
|------------------------------|----------------------|---|--------|---|------------------|
| 1_Testes_ARID4B: -5363, 5901 | upstream, downstream | 1 | 19.000 | 2 | 1_Testes_ARID4B: |
| 1_Testes_ARID4B:             | 230 in gene          | 1 | 22.000 | 1 | 1_Testes_ARID4B: |
| 1_Testes_ARID4B:             | 193 in gene          | 1 | 24.000 | 1 | 1_Testes_ARID4B: |
| 1_Testes_ARID4B: 273682, 306 | downstream, in gene  | 1 | 23.500 | 2 | 1_Testes_ARID4B: |
| 1_Testes_ARID4B:             | 360 in gene          | 1 | 33.000 | 1 | 1_Testes_ARID4B: |
| 1_Testes_ARID4B:             | -145 upstream        | 1 | 20.000 | 1 | 1_Testes_ARID4B: |
| 1_Testes_ARID4B:             | 271 in gene          | 1 | 43.000 | 1 | 1_Testes_ARID4B: |
| 1_Testes_ARID4B:             | 16 in gene           | 1 | 29.000 | 1 | 1_Testes_ARID4B: |
| 1_Testes_ARID4B:             | -266 upstream        | 1 | 29.000 | 1 | 1_Testes_ARID4B: |
| 1_Testes_ARID4B:             | 366 in gene          | 1 | 23.000 | 1 | 1_Testes_ARID4B: |
| 1_Testes_ARID4B:             | 214 in gene          | 1 | 23.000 | 1 | 1_Testes_ARID4B: |
| 1_Testes_ARID4B:             | 144 in gene          | 1 | 32.000 | 1 | 1_Testes_ARID4B: |
| 1_Testes_ARID4B:             | 150 in gene          | 1 | 22.000 | 1 | 1_Testes_ARID4B: |
| 1_Testes_ARID4B:             | -258 upstream        | 1 | 22.000 | 1 | 1_Testes_ARID4B: |
| 1_Testes_ARID4B: 1386, 218   | in gene, in gene     | 1 | 27.500 | 2 | 1_Testes_ARID4B: |
| 1_Testes_ARID4B:             | 155 in gene          | 1 | 21.000 | 1 | 1_Testes_ARID4B: |
| 1_Testes_ARID4B:             | -4104 upstream       | 1 | 21.000 | 1 | 1_Testes_ARID4B: |
| 1_Testes_ARID4B:             | 1723 in gene         | 1 | 27.000 | 1 | 1_Testes_ARID4B: |
| 1_Testes_ARID4B:             | 274 in gene          | 1 | 17.000 | 1 | 1_Testes_ARID4B: |
| 1_Testes_ARID4B:             | 275 in gene          | 1 | 20.000 | 1 | 1_Testes_ARID4B: |
| 1_Testes_ARID4B: 251, -10437 | in gene, upstream    | 1 | 35.000 | 2 | 1_Testes_ARID4B: |
| 1_Testes_ARID4B: 10838, 150  | downstream, in gene  | 1 | 35.000 | 2 | 1_Testes_ARID4B: |
| 1_Testes_ARID4B:             | 115 in gene          | 1 | 29.000 | 1 | 1_Testes_ARID4B: |
| 1_Testes_ARID4B:             | 377 in gene          | 1 | 37.000 | 1 | 1_Testes_ARID4B: |
| 1_Testes_ARID4B:             | 204 in gene          | 1 | 22.000 | 1 | 1_Testes_ARID4B: |
| 1_Testes_ARID4B:             | -274 upstream        | 1 | 26.000 | 1 | 1_Testes_ARID4B: |
| 1_Testes_ARID4B:             | 98 in gene           | 1 | 26.000 | 1 | 1_Testes_ARID4B: |
| 1_Testes_ARID4B:             | 115 in gene          | 1 | 23.000 | 1 | 1_Testes_ARID4B: |
| 1_Testes_ARID4B:             | -10329 upstream      | 1 | 23.000 | 1 | 1_Testes_ARID4B: |
| 1_Testes_ARID4B: 386, -766   | in gene, upstream    | 1 | 21.000 | 2 | 1_Testes_ARID4B: |
| 1_Testes_ARID4B: -842, 310   | upstream, in gene    | 1 | 21.000 | 2 | 1_Testes_ARID4B: |
| 1_Testes_ARID4B: 752, -1168  | in gene, upstream    | 1 | 26.500 | 2 | 1_Testes_ARID4B: |
| 1_Testes_ARID4B:             | 172 in gene          | 1 | 27.000 | 1 | 1_Testes_ARID4B: |
| 1_Testes_ARID4B:             | -234 upstream        | 1 | 27.000 | 1 | 1_Testes_ARID4B: |
| 1_Testes_ARID4B: 114385, 129 | downstream, in gene  | 1 | 28.500 | 2 | 1_Testes_ARID4B: |
| 1_Testes_ARID4B:             | -242 upstream        | 1 | 30.000 | 1 | 1_Testes_ARID4B: |
| 1_Testes_ARID4B:             | 175 in gene          | 1 | 33.000 | 1 | 1_Testes_ARID4B: |
| 1_Testes_ARID4B:             | 1249247 in gene      | 1 | 24.000 | 1 | 1_Testes_ARID4B: |
| 1_Testes_ARID4B:             | -385 upstream        | 1 | 24.000 | 1 | 1_Testes_ARID4B: |
| 1_Testes_ARID4B:             | -4 upstream          | 1 | 31.000 | 1 | 1_Testes_ARID4B: |
| 1_Testes_ARID4B:             | 889 in gene          | 1 | 28.000 | 1 | 1_Testes_ARID4B: |
| 1_Testes_ARID4B: 670, 1278   | in gene, in gene     | 1 | 23.500 | 2 | 1_Testes_ARID4B: |
| 1_Testes_ARID4B: 695, -297   | in gene, upstream    | 1 | 26.000 | 2 | 1_Testes_ARID4B: |
| 1_Testes_ARID4B: -848, 144   | upstream, in gene    | 1 | 26.000 | 2 | 1_Testes_ARID4B: |
| 1_Testes_ARID4B:             | 138 in gene          | 1 | 28.000 | 1 | 1_Testes_ARID4B: |
| 1_Testes_ARID4B:             | 136 in gene          | 1 | 39.000 | 1 | 1_Testes_ARID4B: |
| 1_Testes_ARID4B:             | -492 upstream        | 1 | 22.000 | 1 | 1_Testes_ARID4B: |



|                                    |                        |   |        |   |                  |
|------------------------------------|------------------------|---|--------|---|------------------|
| 1_Testes_ARID4B:                   | 79 in gene             | 1 | 22.000 | 1 | 1_Testes_ARID4B: |
| 1_Testes_ARID4B:                   | 820 in gene            | 1 | 29.000 | 1 | 1_Testes_ARID4B: |
| 1_Testes_ARID4B:                   | 1434 in gene           | 1 | 18.000 | 1 | 1_Testes_ARID4B: |
| 1_Testes_ARID4B:                   | 12268 in gene          | 1 | 23.000 | 1 | 1_Testes_ARID4B: |
| 1_Testes_ARID4B:                   | 462 in gene            | 1 | 23.000 | 1 | 1_Testes_ARID4B: |
| 1_Testes_ARID4B:                   | 195 in gene            | 1 | 23.000 | 1 | 1_Testes_ARID4B: |
| 1_Testes_ARID4B:                   | 764 in gene            | 1 | 19.000 | 1 | 1_Testes_ARID4B: |
| 1_Testes_ARID4B:                   | 276 in gene            | 1 | 30.000 | 1 | 1_Testes_ARID4B: |
| 1_Testes_ARID4B:                   | 8 in gene              | 1 | 16.000 | 1 | 1_Testes_ARID4B: |
| 1_Testes_ARID4B:                   | -5178 upstream         | 1 | 39.000 | 1 | 1_Testes_ARID4B: |
| 1_Testes_ARID4B:                   | 10550 downstream       | 1 | 34.000 | 1 | 1_Testes_ARID4B: |
| 1_Testes_ARID4B:                   | 130 in gene            | 1 | 34.000 | 1 | 1_Testes_ARID4B: |
| 1_Testes_ARID4B:                   | -203 upstream          | 1 | 23.000 | 1 | 1_Testes_ARID4B: |
| 1_Testes_ARID4B:                   | 367 in gene            | 1 | 37.000 | 1 | 1_Testes_ARID4B: |
| 1_Testes_ARID4B:                   | 5 in gene              | 1 | 21.000 | 1 | 1_Testes_ARID4B: |
| 1_Testes_ARID4B:                   | 104 in gene            | 1 | 20.000 | 1 | 1_Testes_ARID4B: |
| 1_Testes_ARID4B:                   | 559 in gene            | 1 | 23.000 | 1 | 1_Testes_ARID4B: |
| 1_Testes_ARID4B:                   | 400 in gene            | 1 | 31.000 | 1 | 1_Testes_ARID4B: |
| 1_Testes_ARID4B:                   | 94 in gene             | 1 | 31.000 | 1 | 1_Testes_ARID4B: |
| 1_Testes_ARID4B:                   | 170 in gene            | 1 | 27.000 | 1 | 1_Testes_ARID4B: |
| 1_Testes_ARID4B:                   | -480 upstream          | 1 | 22.000 | 1 | 1_Testes_ARID4B: |
| 1_Testes_ARID4B:                   | 194 in gene            | 1 | 42.000 | 1 | 1_Testes_ARID4B: |
| 1_Testes_ARID4B:                   | 175 in gene            | 1 | 19.000 | 1 | 1_Testes_ARID4B: |
| 1_Testes_ARID4B:                   | -247 upstream          | 1 | 22.000 | 1 | 1_Testes_ARID4B: |
| 1_Testes_ARID4B: 206, 40574, 45294 | in gene, downstream, c | 1 | 24.000 | 3 | 1_Testes_ARID4B: |
| 1_Testes_ARID4B: 174, -4546        | in gene, upstream      | 1 | 25.000 | 2 | 1_Testes_ARID4B: |
| 1_Testes_ARID4B: 4819, 99          | downstream, in gene    | 1 | 25.000 | 2 | 1_Testes_ARID4B: |
| 1_Testes_ARID4B: 63489, 58769      | downstream, downstre   | 1 | 25.000 | 2 | 1_Testes_ARID4B: |
| 1_Testes_ARID4B:                   | 429 in gene            | 1 | 32.000 | 1 | 1_Testes_ARID4B: |
| 1_Testes_ARID4B:                   | -149 upstream          | 1 | 32.000 | 1 | 1_Testes_ARID4B: |
| 1_Testes_ARID4B:                   | 72210 downstream       | 1 | 32.000 | 1 | 1_Testes_ARID4B: |
| 1_Testes_ARID4B:                   | 111 in gene            | 1 | 31.000 | 1 | 1_Testes_ARID4B: |
| 1_Testes_ARID4B: 15420, -4900      | downstream, upstream   | 1 | 28.000 | 2 | 1_Testes_ARID4B: |
| 1_Testes_ARID4B: 6866, -6302       | in gene, upstream      | 1 | 22.000 | 2 | 1_Testes_ARID4B: |
| 1_Testes_ARID4B: 287, 21199, 28527 | in gene, downstream, c | 1 | 28.333 | 3 | 1_Testes_ARID4B: |
| 1_Testes_ARID4B: 552, 7880, 12616  | in gene, downstream, c | 1 | 35.667 | 3 | 1_Testes_ARID4B: |
| 1_Testes_ARID4B: 7579, 251, -4485  | downstream, in gene, u | 1 | 35.667 | 3 | 1_Testes_ARID4B: |
| 1_Testes_ARID4B: -7507, -179, 4557 | upstream, upstream, d  | 1 | 35.667 | 3 | 1_Testes_ARID4B: |
| 1_Testes_ARID4B: -4704, 32, 26944  | upstream, in gene, dow | 1 | 39.000 | 3 | 1_Testes_ARID4B: |
| 1_Testes_ARID4B:                   | 66 in gene             | 1 | 40.000 | 1 | 1_Testes_ARID4B: |
| 1_Testes_ARID4B: 59592, 136        | downstream, in gene    | 1 | 33.500 | 2 | 1_Testes_ARID4B: |
| 1_Testes_ARID4B:                   | 71 in gene             | 1 | 29.000 | 1 | 1_Testes_ARID4B: |
| 1_Testes_ARID4B:                   | 23650 in gene          | 1 | 27.000 | 1 | 1_Testes_ARID4B: |
| 1_Testes_ARID4B:                   | 182 in gene            | 1 | 32.000 | 1 | 1_Testes_ARID4B: |
| 1_Testes_ARID4B:                   | -2322 upstream         | 1 | 26.000 | 1 | 1_Testes_ARID4B: |
| 1_Testes_ARID4B:                   | 413 in gene            | 1 | 26.000 | 1 | 1_Testes_ARID4B: |
| 1_Testes_ARID4B:                   | 16439 downstream       | 1 | 29.000 | 1 | 1_Testes_ARID4B: |

|                                    |                        |   |        |   |                  |
|------------------------------------|------------------------|---|--------|---|------------------|
| 1_Testes_ARID4B:                   | 910 in gene            | 1 | 29.000 | 1 | 1_Testes_ARID4B: |
| 1_Testes_ARID4B:                   | 422 in gene            | 1 | 29.000 | 1 | 1_Testes_ARID4B: |
| 1_Testes_ARID4B: 4097, 1873        | in gene, in gene       | 1 | 36.000 | 2 | 1_Testes_ARID4B: |
| 1_Testes_ARID4B:                   | -467 upstream          | 1 | 25.000 | 1 | 1_Testes_ARID4B: |
| 1_Testes_ARID4B:                   | 704 in gene            | 1 | 25.000 | 1 | 1_Testes_ARID4B: |
| 1_Testes_ARID4B:                   | 18871 downstream       | 1 | 36.000 | 1 | 1_Testes_ARID4B: |
| 1_Testes_ARID4B: 1327, 147599      | in gene, in gene       | 1 | 26.000 | 2 | 1_Testes_ARID4B: |
| 1_Testes_ARID4B:                   | 3237 downstream        | 1 | 16.000 | 1 | 1_Testes_ARID4B: |
| 1_Testes_ARID4B:                   | 38 in gene             | 1 | 33.000 | 1 | 1_Testes_ARID4B: |
| 1_Testes_ARID4B:                   | 7074 downstream        | 1 | 33.000 | 1 | 1_Testes_ARID4B: |
| 1_Testes_ARID4B:                   | 328 in gene            | 1 | 33.000 | 1 | 1_Testes_ARID4B: |
| 1_Testes_ARID4B:                   | 85 in gene             | 1 | 25.000 | 1 | 1_Testes_ARID4B: |
| 1_Testes_ARID4B:                   | -692 upstream          | 1 | 39.000 | 1 | 1_Testes_ARID4B: |
| 1_Testes_ARID4B:                   | 194 in gene            | 1 | 31.000 | 1 | 1_Testes_ARID4B: |
| 1_Testes_ARID4B:                   | 694 in gene            | 1 | 33.000 | 1 | 1_Testes_ARID4B: |
| 1_Testes_ARID4B: 135, 75975        | in gene, downstream    | 1 | 31.500 | 2 | 1_Testes_ARID4B: |
| 1_Testes_ARID4B:                   | 145 in gene            | 1 | 32.000 | 1 | 1_Testes_ARID4B: |
| 1_Testes_ARID4B: 447, 4735         | in gene, in gene       | 1 | 18.000 | 2 | 1_Testes_ARID4B: |
| 1_Testes_ARID4B:                   | 10137 downstream       | 1 | 18.000 | 1 | 1_Testes_ARID4B: |
| 1_Testes_ARID4B:                   | 180 in gene            | 1 | 18.000 | 1 | 1_Testes_ARID4B: |
| 1_Testes_ARID4B:                   | 896 in gene            | 1 | 20.000 | 1 | 1_Testes_ARID4B: |
| 1_Testes_ARID4B:                   | 41 in gene             | 1 | 22.000 | 1 | 1_Testes_ARID4B: |
| 1_Testes_ARID4B: 383, 1679, 110943 | in gene, in gene, down | 1 | 23.667 | 3 | 1_Testes_ARID4B: |
| 1_Testes_ARID4B:                   | 198 in gene            | 1 | 23.000 | 1 | 1_Testes_ARID4B: |
| 1_Testes_ARID4B:                   | 130 in gene            | 1 | 40.000 | 1 | 1_Testes_ARID4B: |
| 1_Testes_ARID4B: 143, 17583        | in gene, downstream    | 1 | 32.500 | 2 | 1_Testes_ARID4B: |
| 1_Testes_ARID4B:                   | 113 in gene            | 1 | 25.000 | 1 | 1_Testes_ARID4B: |
| 1_Testes_ARID4B:                   | -4625 upstream         | 1 | 25.000 | 1 | 1_Testes_ARID4B: |
| 1_Testes_ARID4B:                   | -2704 upstream         | 1 | 25.000 | 1 | 1_Testes_ARID4B: |
| 1_Testes_ARID4B: -162, 112222      | upstream, downstream   | 1 | 27.500 | 2 | 1_Testes_ARID4B: |
| 1_Testes_ARID4B:                   | -2430 upstream         | 1 | 30.000 | 1 | 1_Testes_ARID4B: |
| 1_Testes_ARID4B:                   | -3493 upstream         | 1 | 30.000 | 1 | 1_Testes_ARID4B: |
| 1_Testes_ARID4B:                   | 37281 downstream       | 1 | 30.000 | 1 | 1_Testes_ARID4B: |
| 1_Testes_ARID4B:                   | 34 in gene             | 1 | 27.000 | 1 | 1_Testes_ARID4B: |
| 1_Testes_ARID4B:                   | -305 upstream          | 1 | 27.000 | 1 | 1_Testes_ARID4B: |
| 1_Testes_ARID4B:                   | 72712 downstream       | 1 | 27.000 | 1 | 1_Testes_ARID4B: |
| 1_Testes_ARID4B:                   | 188 in gene            | 1 | 42.000 | 1 | 1_Testes_ARID4B: |
| 1_Testes_ARID4B:                   | 689 in gene            | 1 | 34.000 | 1 | 1_Testes_ARID4B: |
| 1_Testes_ARID4B:                   | 353 in gene            | 1 | 22.000 | 1 | 1_Testes_ARID4B: |
| 1_Testes_ARID4B:                   | -455 upstream          | 1 | 22.000 | 1 | 1_Testes_ARID4B: |
| 1_Testes_ARID4B:                   | 207 in gene            | 1 | 31.000 | 1 | 1_Testes_ARID4B: |
| 1_Testes_ARID4B:                   | 18105 downstream       | 1 | 32.000 | 1 | 1_Testes_ARID4B: |
| 1_Testes_ARID4B:                   | 236 in gene            | 1 | 32.000 | 1 | 1_Testes_ARID4B: |
| 1_Testes_ARID4B:                   | -189 upstream          | 1 | 37.000 | 1 | 1_Testes_ARID4B: |
| 1_Testes_ARID4B:                   | 109 in gene            | 1 | 37.000 | 1 | 1_Testes_ARID4B: |
| 1_Testes_ARID4B:                   | 332 in gene            | 1 | 27.000 | 1 | 1_Testes_ARID4B: |
| 1_Testes_ARID4B:                   | 102985 in gene         | 1 | 25.000 | 1 | 1_Testes_ARID4B: |

|                               |                      |   |        |   |                  |
|-------------------------------|----------------------|---|--------|---|------------------|
| 1_Testes_ARID4B:              | 246 in gene          | 1 | 24.000 | 1 | 1_Testes_ARID4B: |
| 1_Testes_ARID4B:              | 103 in gene          | 1 | 28.000 | 1 | 1_Testes_ARID4B: |
| 1_Testes_ARID4B:              | -327 upstream        | 1 | 28.000 | 1 | 1_Testes_ARID4B: |
| 1_Testes_ARID4B:              | -8383 upstream       | 1 | 19.000 | 1 | 1_Testes_ARID4B: |
| 1_Testes_ARID4B:              | 10893 downstream     | 1 | 19.000 | 1 | 1_Testes_ARID4B: |
| 1_Testes_ARID4B:              | 450 in gene          | 1 | 22.000 | 1 | 1_Testes_ARID4B: |
| 1_Testes_ARID4B:              | 20705 downstream     | 1 | 22.000 | 1 | 1_Testes_ARID4B: |
| 1_Testes_ARID4B:              | 39689 in gene        | 1 | 18.000 | 1 | 1_Testes_ARID4B: |
| 1_Testes_ARID4B:              | -376 upstream        | 1 | 26.000 | 1 | 1_Testes_ARID4B: |
| 1_Testes_ARID4B:              | -160 upstream        | 1 | 17.000 | 1 | 1_Testes_ARID4B: |
| 1_Testes_ARID4B:              | -782 upstream        | 1 | 27.000 | 1 | 1_Testes_ARID4B: |
| 1_Testes_ARID4B:              | 459 in gene          | 1 | 27.000 | 1 | 1_Testes_ARID4B: |
| 1_Testes_ARID4B:              | 236 in gene          | 1 | 20.000 | 1 | 1_Testes_ARID4B: |
| 1_Testes_ARID4B:              | 208 in gene          | 1 | 19.000 | 1 | 1_Testes_ARID4B: |
| 1_Testes_ARID4B:              | 735 in gene          | 1 | 25.000 | 1 | 1_Testes_ARID4B: |
| 1_Testes_ARID4B:              | 645 downstream       | 1 | 25.000 | 1 | 1_Testes_ARID4B: |
| 1_Testes_ARID4B:              | 11090 downstream     | 1 | 25.000 | 1 | 1_Testes_ARID4B: |
| 1_Testes_ARID4B:              | 101 in gene          | 1 | 24.000 | 1 | 1_Testes_ARID4B: |
| 1_Testes_ARID4B: 98, -10206   | in gene, upstream    | 1 | 24.000 | 2 | 1_Testes_ARID4B: |
| 1_Testes_ARID4B: 9883, -421   | downstream, upstream | 1 | 24.000 | 2 | 1_Testes_ARID4B: |
| 1_Testes_ARID4B: -10100, 204  | upstream, in gene    | 1 | 24.000 | 2 | 1_Testes_ARID4B: |
| 1_Testes_ARID4B: 139, 1851    | in gene, in gene     | 1 | 32.000 | 2 | 1_Testes_ARID4B: |
| 1_Testes_ARID4B:              | 218 in gene          | 1 | 18.000 | 1 | 1_Testes_ARID4B: |
| 1_Testes_ARID4B:              | 242 in gene          | 1 | 31.000 | 1 | 1_Testes_ARID4B: |
| 1_Testes_ARID4B:              | -1217 upstream       | 1 | 31.000 | 1 | 1_Testes_ARID4B: |
| 1_Testes_ARID4B:              | 379 in gene          | 1 | 25.000 | 1 | 1_Testes_ARID4B: |
| 1_Testes_ARID4B:              | -96 upstream         | 1 | 28.000 | 1 | 1_Testes_ARID4B: |
| 1_Testes_ARID4B:              | 363 in gene          | 1 | 35.000 | 1 | 1_Testes_ARID4B: |
| 1_Testes_ARID4B:              | -191 upstream        | 1 | 35.000 | 1 | 1_Testes_ARID4B: |
| 1_Testes_ARID4B:              | 509 in gene          | 1 | 31.000 | 1 | 1_Testes_ARID4B: |
| 1_Testes_ARID4B:              | -83 upstream         | 1 | 32.000 | 1 | 1_Testes_ARID4B: |
| 1_Testes_ARID4B:              | 27 in gene           | 1 | 32.000 | 1 | 1_Testes_ARID4B: |
| 1_Testes_ARID4B:              | 5873 downstream      | 1 | 32.000 | 1 | 1_Testes_ARID4B: |
| 1_Testes_ARID4B: 95, 991      | in gene, in gene     | 1 | 21.500 | 2 | 1_Testes_ARID4B: |
| 1_Testes_ARID4B: 3901, 3005   | downstream, downstre | 1 | 21.500 | 2 | 1_Testes_ARID4B: |
| 1_Testes_ARID4B:              | 87 in gene           | 1 | 26.000 | 1 | 1_Testes_ARID4B: |
| 1_Testes_ARID4B:              | 40420 downstream     | 1 | 26.000 | 1 | 1_Testes_ARID4B: |
| 1_Testes_ARID4B:              | 25814 downstream     | 1 | 25.000 | 1 | 1_Testes_ARID4B: |
| 1_Testes_ARID4B:              | 164 in gene          | 1 | 25.000 | 1 | 1_Testes_ARID4B: |
| 1_Testes_ARID4B:              | 23710 downstream     | 1 | 25.000 | 1 | 1_Testes_ARID4B: |
| 1_Testes_ARID4B:              | 5411 downstream      | 1 | 36.000 | 1 | 1_Testes_ARID4B: |
| 1_Testes_ARID4B:              | 716 in gene          | 1 | 36.000 | 1 | 1_Testes_ARID4B: |
| 1_Testes_ARID4B:              | 141 in gene          | 1 | 29.000 | 1 | 1_Testes_ARID4B: |
| 1_Testes_ARID4B:              | 217 in gene          | 1 | 39.000 | 1 | 1_Testes_ARID4B: |
| 1_Testes_ARID4B: 3245, 893    | in gene, in gene     | 1 | 33.500 | 2 | 1_Testes_ARID4B: |
| 1_Testes_ARID4B: 31492, 29140 | downstream, downstre | 1 | 33.500 | 2 | 1_Testes_ARID4B: |
| 1_Testes_ARID4B:              | 563 in gene          | 1 | 35.000 | 1 | 1_Testes_ARID4B: |

|                               |                      |   |        |   |                  |
|-------------------------------|----------------------|---|--------|---|------------------|
| 1_Testes_ARID4B:              | 197 in gene          | 1 | 35.000 | 1 | 1_Testes_ARID4B: |
| 1_Testes_ARID4B:              | 12459 downstream     | 1 | 35.000 | 1 | 1_Testes_ARID4B: |
| 1_Testes_ARID4B:              | 642 in gene          | 1 | 34.000 | 1 | 1_Testes_ARID4B: |
| 1_Testes_ARID4B: -6529, 11487 | upstream, downstream | 1 | 25.000 | 2 | 1_Testes_ARID4B: |
| 1_Testes_ARID4B:              | 769 in gene          | 1 | 16.000 | 1 | 1_Testes_ARID4B: |
| 1_Testes_ARID4B:              | 780 in gene          | 1 | 35.000 | 1 | 1_Testes_ARID4B: |
| 1_Testes_ARID4B: 14436, 740   | downstream, in gene  | 1 | 37.000 | 2 | 1_Testes_ARID4B: |
| 1_Testes_ARID4B:              | -6647 upstream       | 1 | 39.000 | 1 | 1_Testes_ARID4B: |
| 1_Testes_ARID4B:              | -10422 upstream      | 1 | 39.000 | 1 | 1_Testes_ARID4B: |
| 1_Testes_ARID4B:              | 18192 in gene        | 1 | 17.000 | 1 | 1_Testes_ARID4B: |
| 1_Testes_ARID4B:              | 765 in gene          | 1 | 17.000 | 1 | 1_Testes_ARID4B: |
| 1_Testes_ARID4B:              | 9936 downstream      | 1 | 18.000 | 1 | 1_Testes_ARID4B: |
| 1_Testes_ARID4B: 1873, -8383  | in gene, upstream    | 1 | 23.000 | 2 | 1_Testes_ARID4B: |
| 1_Testes_ARID4B: 12215, 1959  | downstream, in gene  | 1 | 23.000 | 2 | 1_Testes_ARID4B: |
| 1_Testes_ARID4B:              | 12538 downstream     | 1 | 23.000 | 1 | 1_Testes_ARID4B: |
| 1_Testes_ARID4B:              | 203 in gene          | 1 | 23.000 | 1 | 1_Testes_ARID4B: |
| 1_Testes_ARID4B:              | 13378 downstream     | 1 | 25.000 | 1 | 1_Testes_ARID4B: |
| 1_Testes_ARID4B:              | -6618 upstream       | 1 | 25.000 | 1 | 1_Testes_ARID4B: |
| 1_Testes_ARID4B:              | -771 upstream        | 1 | 25.000 | 1 | 1_Testes_ARID4B: |
| 1_Testes_ARID4B:              | 82 in gene           | 1 | 25.000 | 1 | 1_Testes_ARID4B: |
| 1_Testes_ARID4B:              | 17514 downstream     | 1 | 27.000 | 1 | 1_Testes_ARID4B: |
| 1_Testes_ARID4B: -2, -7618    | upstream, upstream   | 1 | 33.500 | 2 | 1_Testes_ARID4B: |
| 1_Testes_ARID4B: 8126, 510    | downstream, in gene  | 1 | 33.500 | 2 | 1_Testes_ARID4B: |
| 1_Testes_ARID4B:              | -6888 upstream       | 1 | 40.000 | 1 | 1_Testes_ARID4B: |
| 1_Testes_ARID4B:              | -9502 upstream       | 1 | 21.000 | 1 | 1_Testes_ARID4B: |
| 1_Testes_ARID4B:              | 9173 downstream      | 1 | 21.000 | 1 | 1_Testes_ARID4B: |
| 1_Testes_ARID4B:              | 409 in gene          | 1 | 21.000 | 1 | 1_Testes_ARID4B: |
| 1_Testes_ARID4B:              | -8636 upstream       | 1 | 27.000 | 1 | 1_Testes_ARID4B: |
| 1_Testes_ARID4B:              | 48 in gene           | 1 | 27.000 | 1 | 1_Testes_ARID4B: |
| 1_Testes_ARID4B:              | -172 upstream        | 1 | 27.000 | 1 | 1_Testes_ARID4B: |
| 1_Testes_ARID4B:              | 163 in gene          | 1 | 27.000 | 1 | 1_Testes_ARID4B: |
| 1_Testes_ARID4B:              | 12568 downstream     | 1 | 27.000 | 1 | 1_Testes_ARID4B: |
| 1_Testes_ARID4B:              | 13 in gene           | 1 | 19.000 | 1 | 1_Testes_ARID4B: |
| 1_Testes_ARID4B:              | 102 in gene          | 1 | 23.000 | 1 | 1_Testes_ARID4B: |
| 1_Testes_ARID4B:              | -3875 upstream       | 1 | 23.000 | 1 | 1_Testes_ARID4B: |
| 1_Testes_ARID4B:              | 444 in gene          | 1 | 29.000 | 1 | 1_Testes_ARID4B: |
| 1_Testes_ARID4B: -1731, -595  | upstream, upstream   | 1 | 21.000 | 2 | 1_Testes_ARID4B: |
| 1_Testes_ARID4B:              | 190 in gene          | 1 | 28.000 | 1 | 1_Testes_ARID4B: |
| 1_Testes_ARID4B:              | 217 in gene          | 1 | 27.000 | 1 | 1_Testes_ARID4B: |
| 1_Testes_ARID4B:              | -229 upstream        | 1 | 21.000 | 1 | 1_Testes_ARID4B: |
| 1_Testes_ARID4B:              | 19 in gene           | 1 | 35.000 | 1 | 1_Testes_ARID4B: |
| 1_Testes_ARID4B:              | -95 upstream         | 1 | 35.000 | 1 | 1_Testes_ARID4B: |
| 1_Testes_ARID4B: 64118, 182   | downstream, in gene  | 1 | 32.500 | 2 | 1_Testes_ARID4B: |
| 1_Testes_ARID4B:              | 244 in gene          | 1 | 22.000 | 1 | 1_Testes_ARID4B: |
| 1_Testes_ARID4B:              | 199 in gene          | 1 | 28.000 | 1 | 1_Testes_ARID4B: |
| 1_Testes_ARID4B:              | 863 in gene          | 1 | 26.000 | 1 | 1_Testes_ARID4B: |
| 1_Testes_ARID4B:              | 306 in gene          | 1 | 34.000 | 1 | 1_Testes_ARID4B: |

|                  |                                               |   |        |   |                  |
|------------------|-----------------------------------------------|---|--------|---|------------------|
| 1_Testes_ARID4B: | 151 in gene                                   | 1 | 31.000 | 1 | 1_Testes_ARID4B: |
| 1_Testes_ARID4B: | 34791 in gene                                 | 1 | 27.000 | 1 | 1_Testes_ARID4B: |
| 1_Testes_ARID4B: | 219 in gene                                   | 1 | 16.000 | 1 | 1_Testes_ARID4B: |
| 1_Testes_ARID4B: | 1326 in gene                                  | 1 | 21.000 | 1 | 1_Testes_ARID4B: |
| 1_Testes_ARID4B: | 82821, 33829, 677, -58 downstream, in gene, i | 1 | 25.750 | 4 | 1_Testes_ARID4B: |
| 1_Testes_ARID4B: | -7905 upstream                                | 1 | 21.000 | 1 | 1_Testes_ARID4B: |
| 1_Testes_ARID4B: | 179 in gene                                   | 1 | 22.000 | 1 | 1_Testes_ARID4B: |
| 1_Testes_ARID4B: | 23 in gene                                    | 1 | 26.000 | 1 | 1_Testes_ARID4B: |
| 1_Testes_ARID4B: | 135 in gene                                   | 1 | 28.000 | 1 | 1_Testes_ARID4B: |
| 1_Testes_ARID4B: | 440 in gene                                   | 1 | 23.000 | 1 | 1_Testes_ARID4B: |
| 1_Testes_ARID4B: | 171, 77419 in gene, downstream                | 1 | 25.000 | 2 | 1_Testes_ARID4B: |
| 1_Testes_ARID4B: | 230 in gene                                   | 1 | 27.000 | 1 | 1_Testes_ARID4B: |
| 1_Testes_ARID4B: | 4284, -180 in gene, upstream                  | 1 | 40.500 | 2 | 1_Testes_ARID4B: |
| 1_Testes_ARID4B: | 177 in gene                                   | 1 | 27.000 | 1 | 1_Testes_ARID4B: |
| 1_Testes_ARID4B: | -290, 478 upstream, in gene                   | 1 | 18.000 | 2 | 1_Testes_ARID4B: |
| 1_Testes_ARID4B: | 56 in gene                                    | 1 | 30.000 | 1 | 1_Testes_ARID4B: |
| 1_Testes_ARID4B: | 138 in gene                                   | 1 | 33.000 | 1 | 1_Testes_ARID4B: |
| 1_Testes_ARID4B: | 268 in gene                                   | 1 | 34.000 | 1 | 1_Testes_ARID4B: |
| 1_Testes_ARID4B: | 113, -3519 in gene, upstream                  | 1 | 26.500 | 2 | 1_Testes_ARID4B: |
| 1_Testes_ARID4B: | -3446, 186 upstream, in gene                  | 1 | 26.500 | 2 | 1_Testes_ARID4B: |
| 1_Testes_ARID4B: | -279 upstream                                 | 1 | 44.000 | 1 | 1_Testes_ARID4B: |
| 1_Testes_ARID4B: | 383 in gene                                   | 1 | 44.000 | 1 | 1_Testes_ARID4B: |
| 1_Testes_ARID4B: | 536 in gene                                   | 1 | 27.000 | 1 | 1_Testes_ARID4B: |
| 1_Testes_ARID4B: | 64130, 151 downstream, in gene                | 1 | 34.000 | 2 | 1_Testes_ARID4B: |
| 1_Testes_ARID4B: | -2796 upstream                                | 1 | 20.000 | 1 | 1_Testes_ARID4B: |
| 1_Testes_ARID4B: | 260 in gene                                   | 1 | 25.000 | 1 | 1_Testes_ARID4B: |
| 1_Testes_ARID4B: | -2813 upstream                                | 1 | 22.000 | 1 | 1_Testes_ARID4B: |
| 1_Testes_ARID4B: | 2854 in gene                                  | 1 | 22.000 | 1 | 1_Testes_ARID4B: |
| 1_Testes_ARID4B: | 172 in gene                                   | 1 | 27.000 | 1 | 1_Testes_ARID4B: |
| 1_Testes_ARID4B: | 25162, 282 downstream, in gene                | 1 | 29.000 | 2 | 1_Testes_ARID4B: |
| 1_Testes_ARID4B: | 1243 in gene                                  | 1 | 20.000 | 1 | 1_Testes_ARID4B: |
| 1_Testes_ARID4B: | 319, -5441 in gene, upstream                  | 1 | 22.500 | 2 | 1_Testes_ARID4B: |
| 1_Testes_ARID4B: | 6030, 270 downstream, in gene                 | 1 | 22.500 | 2 | 1_Testes_ARID4B: |
| 1_Testes_ARID4B: | 18440 downstream                              | 1 | 24.000 | 1 | 1_Testes_ARID4B: |
| 1_Testes_ARID4B: | 393 in gene                                   | 1 | 19.000 | 1 | 1_Testes_ARID4B: |
| 1_Testes_ARID4B: | 239 in gene                                   | 1 | 31.000 | 1 | 1_Testes_ARID4B: |
| 1_Testes_ARID4B: | -278 upstream                                 | 1 | 31.000 | 1 | 1_Testes_ARID4B: |
| 1_Testes_ARID4B: | 14651 downstream                              | 1 | 28.000 | 1 | 1_Testes_ARID4B: |
| 1_Testes_ARID4B: | 221 in gene                                   | 1 | 28.000 | 1 | 1_Testes_ARID4B: |
| 1_Testes_ARID4B: | -8584 upstream                                | 1 | 28.000 | 1 | 1_Testes_ARID4B: |
| 1_Testes_ARID4B: | 539 in gene                                   | 1 | 22.000 | 1 | 1_Testes_ARID4B: |
| 1_Testes_ARID4B: | 36752 downstream                              | 1 | 22.000 | 1 | 1_Testes_ARID4B: |
| 1_Testes_ARID4B: | 564 in gene                                   | 1 | 15.000 | 1 | 1_Testes_ARID4B: |
| 1_Testes_ARID4B: | -8317 upstream                                | 1 | 15.000 | 1 | 1_Testes_ARID4B: |
| 1_Testes_ARID4B: | 627 in gene                                   | 1 | 19.000 | 1 | 1_Testes_ARID4B: |
| 1_Testes_ARID4B: | 562 in gene                                   | 1 | 20.000 | 1 | 1_Testes_ARID4B: |
| 1_Testes_ARID4B: | 447 in gene                                   | 1 | 21.000 | 1 | 1_Testes_ARID4B: |

|                  |                                                |   |        |   |                  |
|------------------|------------------------------------------------|---|--------|---|------------------|
| 1_Testes_ARID4B: | 151 in gene                                    | 1 | 32.000 | 1 | 1_Testes_ARID4B: |
| 1_Testes_ARID4B: | -9340 upstream                                 | 1 | 32.000 | 1 | 1_Testes_ARID4B: |
| 1_Testes_ARID4B: | 167 in gene                                    | 1 | 23.000 | 1 | 1_Testes_ARID4B: |
| 1_Testes_ARID4B: | 453 in gene                                    | 1 | 27.000 | 1 | 1_Testes_ARID4B: |
| 1_Testes_ARID4B: | 42097 downstream                               | 1 | 22.000 | 1 | 1_Testes_ARID4B: |
| 1_Testes_ARID4B: | 11 in gene                                     | 1 | 22.000 | 1 | 1_Testes_ARID4B: |
| 1_Testes_ARID4B: | 157 in gene                                    | 1 | 32.000 | 1 | 1_Testes_ARID4B: |
| 1_Testes_ARID4B: | 32701 downstream                               | 1 | 32.000 | 1 | 1_Testes_ARID4B: |
| 1_Testes_ARID4B: | -572 upstream                                  | 1 | 26.000 | 1 | 1_Testes_ARID4B: |
| 1_Testes_ARID4B: | 280 in gene                                    | 1 | 26.000 | 1 | 1_Testes_ARID4B: |
| 1_Testes_ARID4B: | -2387 upstream                                 | 1 | 26.000 | 1 | 1_Testes_ARID4B: |
| 1_Testes_ARID4B: | 65 in gene                                     | 1 | 20.000 | 1 | 1_Testes_ARID4B: |
| 1_Testes_ARID4B: | 191 in gene                                    | 1 | 28.000 | 1 | 1_Testes_ARID4B: |
| 1_Testes_ARID4B: | -267 upstream                                  | 1 | 28.000 | 1 | 1_Testes_ARID4B: |
| 1_Testes_ARID4B: | -749, 88723, 89843, 90 upstream, in gene, in g | 1 | 22.750 | 4 | 1_Testes_ARID4B: |
| 1_Testes_ARID4B: | 16311, 15191, 14231 downstream, downstre       | 1 | 23.333 | 3 | 1_Testes_ARID4B: |
| 1_Testes_ARID4B: | 185 in gene                                    | 1 | 22.000 | 1 | 1_Testes_ARID4B: |
| 1_Testes_ARID4B: | 153 in gene                                    | 1 | 23.000 | 1 | 1_Testes_ARID4B: |
| 1_Testes_ARID4B: | -308 upstream                                  | 1 | 23.000 | 1 | 1_Testes_ARID4B: |
| 1_Testes_ARID4B: | 453 in gene                                    | 1 | 25.000 | 1 | 1_Testes_ARID4B: |
| 1_Testes_ARID4B: | -6815, -7967 upstream, upstream                | 1 | 18.500 | 2 | 1_Testes_ARID4B: |
| 1_Testes_ARID4B: | 787 in gene                                    | 1 | 29.000 | 1 | 1_Testes_ARID4B: |
| 1_Testes_ARID4B: | 172 in gene                                    | 1 | 33.000 | 1 | 1_Testes_ARID4B: |
| 1_Testes_ARID4B: | -7276 upstream                                 | 1 | 33.000 | 1 | 1_Testes_ARID4B: |
| 1_Testes_ARID4B: | 37 in gene                                     | 1 | 20.000 | 1 | 1_Testes_ARID4B: |
| 1_Testes_ARID4B: | 29396, -12 downstream, upstream                | 1 | 31.500 | 2 | 1_Testes_ARID4B: |
| 1_Testes_ARID4B: | 86 in gene                                     | 1 | 43.000 | 1 | 1_Testes_ARID4B: |
| 1_Testes_ARID4B: | 864 in gene                                    | 1 | 34.000 | 1 | 1_Testes_ARID4B: |
| 1_Testes_ARID4B: | -359 upstream                                  | 1 | 33.000 | 1 | 1_Testes_ARID4B: |
| 1_Testes_ARID4B: | 248 in gene                                    | 1 | 39.000 | 1 | 1_Testes_ARID4B: |
| 1_Testes_ARID4B: | -489 upstream                                  | 1 | 39.000 | 1 | 1_Testes_ARID4B: |
| 1_Testes_ARID4B: | 218 in gene                                    | 1 | 28.000 | 1 | 1_Testes_ARID4B: |
| 1_Testes_ARID4B: | 119 in gene                                    | 1 | 28.000 | 1 | 1_Testes_ARID4B: |
| 1_Testes_ARID4B: | 301 in gene                                    | 1 | 24.000 | 1 | 1_Testes_ARID4B: |
| 1_Testes_ARID4B: | 727 in gene                                    | 1 | 30.000 | 1 | 1_Testes_ARID4B: |
| 1_Testes_ARID4B: | 177 in gene                                    | 1 | 30.000 | 1 | 1_Testes_ARID4B: |
| 1_Testes_ARID4B: | 461 in gene                                    | 1 | 30.000 | 1 | 1_Testes_ARID4B: |
| 1_Testes_ARID4B: | 456 downstream                                 | 1 | 30.000 | 1 | 1_Testes_ARID4B: |
| 1_Testes_ARID4B: | 51627 downstream                               | 1 | 30.000 | 1 | 1_Testes_ARID4B: |
| 1_Testes_ARID4B: | 248 in gene                                    | 1 | 29.000 | 1 | 1_Testes_ARID4B: |
| 1_Testes_ARID4B: | 29045 downstream                               | 1 | 29.000 | 1 | 1_Testes_ARID4B: |
| 1_Testes_ARID4B: | 80 in gene                                     | 1 | 30.000 | 1 | 1_Testes_ARID4B: |
| 1_Testes_ARID4B: | 47 in gene                                     | 1 | 23.000 | 1 | 1_Testes_ARID4B: |
| 1_Testes_ARID4B: | 1459 in gene                                   | 1 | 21.000 | 1 | 1_Testes_ARID4B: |
| 1_Testes_ARID4B: | 362 in gene                                    | 1 | 17.000 | 1 | 1_Testes_ARID4B: |
| 1_Testes_ARID4B: | 701 in gene                                    | 1 | 21.000 | 1 | 1_Testes_ARID4B: |
| 1_Testes_ARID4B: | -8868 upstream                                 | 1 | 21.000 | 1 | 1_Testes_ARID4B: |

|                              |                     |   |        |   |                  |
|------------------------------|---------------------|---|--------|---|------------------|
| 1_Testes_ARID4B:             | -4531 upstream      | 1 | 31.000 | 1 | 1_Testes_ARID4B: |
| 1_Testes_ARID4B:             | 169 in gene         | 1 | 31.000 | 1 | 1_Testes_ARID4B: |
| 1_Testes_ARID4B:             | 171 in gene         | 1 | 23.000 | 1 | 1_Testes_ARID4B: |
| 1_Testes_ARID4B:             | 180 in gene         | 1 | 39.000 | 1 | 1_Testes_ARID4B: |
| 1_Testes_ARID4B:             | 106 in gene         | 1 | 33.000 | 1 | 1_Testes_ARID4B: |
| 1_Testes_ARID4B:             | -281 upstream       | 1 | 27.000 | 1 | 1_Testes_ARID4B: |
| 1_Testes_ARID4B:             | 483 in gene         | 1 | 23.000 | 1 | 1_Testes_ARID4B: |
| 1_Testes_ARID4B: -182, 490   | upstream, in gene   | 1 | 26.000 | 2 | 1_Testes_ARID4B: |
| 1_Testes_ARID4B: 659, -514   | in gene, upstream   | 1 | 24.500 | 2 | 1_Testes_ARID4B: |
| 1_Testes_ARID4B:             | 450 in gene         | 1 | 21.000 | 1 | 1_Testes_ARID4B: |
| 1_Testes_ARID4B:             | -226 upstream       | 1 | 26.000 | 1 | 1_Testes_ARID4B: |
| 1_Testes_ARID4B:             | 118 in gene         | 1 | 26.000 | 1 | 1_Testes_ARID4B: |
| 1_Testes_ARID4B:             | -9318 upstream      | 1 | 23.000 | 1 | 1_Testes_ARID4B: |
| 1_Testes_ARID4B:             | 223 in gene         | 1 | 23.000 | 1 | 1_Testes_ARID4B: |
| 1_Testes_ARID4B:             | -408 upstream       | 1 | 23.000 | 1 | 1_Testes_ARID4B: |
| 1_Testes_ARID4B:             | 573 in gene         | 1 | 26.000 | 1 | 1_Testes_ARID4B: |
| 1_Testes_ARID4B:             | 248 in gene         | 1 | 25.000 | 1 | 1_Testes_ARID4B: |
| 1_Testes_ARID4B:             | 1735 in gene        | 1 | 15.000 | 1 | 1_Testes_ARID4B: |
| 1_Testes_ARID4B:             | 341 in gene         | 1 | 22.000 | 1 | 1_Testes_ARID4B: |
| 1_Testes_ARID4B: 16520, 168  | downstream, in gene | 1 | 25.000 | 2 | 1_Testes_ARID4B: |
| 1_Testes_ARID4B:             | -455 upstream       | 1 | 28.000 | 1 | 1_Testes_ARID4B: |
| 1_Testes_ARID4B:             | -8267 upstream      | 1 | 28.000 | 1 | 1_Testes_ARID4B: |
| 1_Testes_ARID4B:             | 187 in gene         | 1 | 28.000 | 1 | 1_Testes_ARID4B: |
| 1_Testes_ARID4B:             | -1621 upstream      | 1 | 28.000 | 1 | 1_Testes_ARID4B: |
| 1_Testes_ARID4B:             | 155 in gene         | 1 | 22.000 | 1 | 1_Testes_ARID4B: |
| 1_Testes_ARID4B:             | 96 in gene          | 1 | 20.000 | 1 | 1_Testes_ARID4B: |
| 1_Testes_ARID4B:             | -275 upstream       | 1 | 26.000 | 1 | 1_Testes_ARID4B: |
| 1_Testes_ARID4B: 479, -401   | in gene, upstream   | 1 | 19.500 | 2 | 1_Testes_ARID4B: |
| 1_Testes_ARID4B:             | -317 upstream       | 1 | 23.000 | 1 | 1_Testes_ARID4B: |
| 1_Testes_ARID4B:             | 198 in gene         | 1 | 23.000 | 1 | 1_Testes_ARID4B: |
| 1_Testes_ARID4B:             | 487 in gene         | 1 | 24.000 | 1 | 1_Testes_ARID4B: |
| 1_Testes_ARID4B:             | -692 upstream       | 1 | 24.000 | 1 | 1_Testes_ARID4B: |
| 1_Testes_ARID4B:             | 35279 downstream    | 1 | 19.000 | 1 | 1_Testes_ARID4B: |
| 1_Testes_ARID4B:             | 1968 in gene        | 1 | 19.000 | 1 | 1_Testes_ARID4B: |
| 1_Testes_ARID4B:             | 458 in gene         | 1 | 23.000 | 1 | 1_Testes_ARID4B: |
| 1_Testes_ARID4B:             | -1303 upstream      | 1 | 23.000 | 1 | 1_Testes_ARID4B: |
| 1_Testes_ARID4B:             | 231 in gene         | 1 | 38.000 | 1 | 1_Testes_ARID4B: |
| 1_Testes_ARID4B:             | 325 in gene         | 1 | 24.000 | 1 | 1_Testes_ARID4B: |
| 1_Testes_ARID4B:             | 296 in gene         | 1 | 33.000 | 1 | 1_Testes_ARID4B: |
| 1_Testes_ARID4B:             | 295 in gene         | 1 | 17.000 | 1 | 1_Testes_ARID4B: |
| 1_Testes_ARID4B:             | 116 in gene         | 1 | 28.000 | 1 | 1_Testes_ARID4B: |
| 1_Testes_ARID4B:             | -544 upstream       | 1 | 28.000 | 1 | 1_Testes_ARID4B: |
| 1_Testes_ARID4B: 426, 158986 | in gene, in gene    | 1 | 30.500 | 2 | 1_Testes_ARID4B: |
| 1_Testes_ARID4B:             | 274 in gene         | 1 | 34.000 | 1 | 1_Testes_ARID4B: |
| 1_Testes_ARID4B: 352087, 428 | in gene, in gene    | 1 | 22.500 | 2 | 1_Testes_ARID4B: |
| 1_Testes_ARID4B:             | 1016 in gene        | 1 | 26.000 | 1 | 1_Testes_ARID4B: |
| 1_Testes_ARID4B:             | 591 in gene         | 1 | 25.000 | 1 | 1_Testes_ARID4B: |

|                                  |                         |   |        |   |                  |
|----------------------------------|-------------------------|---|--------|---|------------------|
| 1_Testes_ARID4B:                 | 541 in gene             | 1 | 23.000 | 1 | 1_Testes_ARID4B: |
| 1_Testes_ARID4B:                 | 300 in gene             | 1 | 35.000 | 1 | 1_Testes_ARID4B: |
| 1_Testes_ARID4B:                 | -612 upstream           | 1 | 35.000 | 1 | 1_Testes_ARID4B: |
| 1_Testes_ARID4B:                 | -506 upstream           | 1 | 28.000 | 1 | 1_Testes_ARID4B: |
| 1_Testes_ARID4B:                 | -3236 upstream          | 1 | 28.000 | 1 | 1_Testes_ARID4B: |
| 1_Testes_ARID4B:                 | 355 in gene             | 1 | 28.000 | 1 | 1_Testes_ARID4B: |
| 1_Testes_ARID4B:                 | 75 in gene              | 1 | 19.000 | 1 | 1_Testes_ARID4B: |
| 1_Testes_ARID4B:                 | 193 in gene             | 1 | 23.000 | 1 | 1_Testes_ARID4B: |
| 1_Testes_ARID4B: 167, 136727     | in gene, downstream     | 1 | 26.000 | 2 | 1_Testes_ARID4B: |
| 1_Testes_ARID4B:                 | -132 upstream           | 1 | 30.000 | 1 | 1_Testes_ARID4B: |
| 1_Testes_ARID4B:                 | -9904 upstream          | 1 | 30.000 | 1 | 1_Testes_ARID4B: |
| 1_Testes_ARID4B:                 | -146 upstream           | 1 | 24.000 | 1 | 1_Testes_ARID4B: |
| 1_Testes_ARID4B:                 | 81 in gene              | 1 | 24.000 | 1 | 1_Testes_ARID4B: |
| 1_Testes_ARID4B:                 | 194 in gene             | 1 | 26.000 | 1 | 1_Testes_ARID4B: |
| 1_Testes_ARID4B:                 | 3439 in gene            | 1 | 26.000 | 1 | 1_Testes_ARID4B: |
| 1_Testes_ARID4B:                 | 155 in gene             | 1 | 27.000 | 1 | 1_Testes_ARID4B: |
| 1_Testes_ARID4B:                 | 361 in gene             | 1 | 21.000 | 1 | 1_Testes_ARID4B: |
| 1_Testes_ARID4B: -2336, 16, 4288 | upstream, in gene, in g | 1 | 25.333 | 3 | 1_Testes_ARID4B: |
| 1_Testes_ARID4B: 28135, 1863     | downstream, in gene     | 1 | 23.500 | 2 | 1_Testes_ARID4B: |
| 1_Testes_ARID4B: 6, 566534       | in gene, downstream     | 1 | 29.000 | 2 | 1_Testes_ARID4B: |
| 1_Testes_ARID4B:                 | 166 in gene             | 1 | 27.000 | 1 | 1_Testes_ARID4B: |
| 1_Testes_ARID4B:                 | 31158 in gene           | 1 | 18.000 | 1 | 1_Testes_ARID4B: |
| 1_Testes_ARID4B:                 | 571 in gene             | 1 | 26.000 | 1 | 1_Testes_ARID4B: |
| 1_Testes_ARID4B:                 | -563 upstream           | 1 | 28.000 | 1 | 1_Testes_ARID4B: |
| 1_Testes_ARID4B:                 | 10456 in gene           | 1 | 30.000 | 1 | 1_Testes_ARID4B: |
| 1_Testes_ARID4B:                 | 524 in gene             | 1 | 28.000 | 1 | 1_Testes_ARID4B: |
| 1_Testes_ARID4B:                 | 453 in gene             | 1 | 28.000 | 1 | 1_Testes_ARID4B: |
| 1_Testes_ARID4B:                 | 226 in gene             | 1 | 35.000 | 1 | 1_Testes_ARID4B: |
| 1_Testes_ARID4B:                 | 48 in gene              | 1 | 25.000 | 1 | 1_Testes_ARID4B: |
| 1_Testes_ARID4B:                 | 220 in gene             | 1 | 35.000 | 1 | 1_Testes_ARID4B: |
| 1_Testes_ARID4B:                 | -378 upstream           | 1 | 35.000 | 1 | 1_Testes_ARID4B: |
| 1_Testes_ARID4B: -62, 562        | upstream, in gene       | 1 | 16.500 | 2 | 1_Testes_ARID4B: |
| 1_Testes_ARID4B:                 | -307 upstream           | 1 | 18.000 | 1 | 1_Testes_ARID4B: |
| 1_Testes_ARID4B:                 | 382 in gene             | 1 | 20.000 | 1 | 1_Testes_ARID4B: |
| 1_Testes_ARID4B:                 | 341798 in gene          | 1 | 28.000 | 1 | 1_Testes_ARID4B: |
| 1_Testes_ARID4B:                 | 83 in gene              | 1 | 26.000 | 1 | 1_Testes_ARID4B: |
| 1_Testes_ARID4B:                 | 113 in gene             | 1 | 26.000 | 1 | 1_Testes_ARID4B: |
| 1_Testes_ARID4B:                 | 7 in gene               | 1 | 29.000 | 1 | 1_Testes_ARID4B: |
| 1_Testes_ARID4B:                 | 528 in gene             | 1 | 19.000 | 1 | 1_Testes_ARID4B: |
| 1_Testes_ARID4B:                 | 391 in gene             | 1 | 21.000 | 1 | 1_Testes_ARID4B: |
| 1_Testes_ARID4B:                 | 206 in gene             | 1 | 39.000 | 1 | 1_Testes_ARID4B: |
| 1_Testes_ARID4B: 23310, 958      | downstream, in gene     | 1 | 36.000 | 2 | 1_Testes_ARID4B: |
| 1_Testes_ARID4B:                 | 141 in gene             | 1 | 33.000 | 1 | 1_Testes_ARID4B: |
| 1_Testes_ARID4B:                 | -128 upstream           | 1 | 24.000 | 1 | 1_Testes_ARID4B: |
| 1_Testes_ARID4B:                 | 32 in gene              | 1 | 24.000 | 1 | 1_Testes_ARID4B: |
| 1_Testes_ARID4B:                 | 357 in gene             | 1 | 19.000 | 1 | 1_Testes_ARID4B: |
| 1_Testes_ARID4B:                 | -480 upstream           | 1 | 18.000 | 1 | 1_Testes_ARID4B: |



|                                         |                          |   |        |   |                  |
|-----------------------------------------|--------------------------|---|--------|---|------------------|
| 1_Testes_ARID4B:                        | 278 in gene              | 1 | 36.000 | 1 | 1_Testes_ARID4B: |
| 1_Testes_ARID4B:                        | 404 in gene              | 1 | 23.000 | 1 | 1_Testes_ARID4B: |
| 1_Testes_ARID4B:                        | 202 in gene              | 1 | 31.000 | 1 | 1_Testes_ARID4B: |
| 1_Testes_ARID4B:                        | -6556 upstream           | 1 | 31.000 | 1 | 1_Testes_ARID4B: |
| 1_Testes_ARID4B:                        | 156 in gene              | 1 | 21.000 | 1 | 1_Testes_ARID4B: |
| 1_Testes_ARID4B:                        | 611 in gene              | 1 | 22.000 | 1 | 1_Testes_ARID4B: |
| 1_Testes_ARID4B:                        | 24505 downstream         | 1 | 22.000 | 1 | 1_Testes_ARID4B: |
| 1_Testes_ARID4B:                        | 403 in gene              | 1 | 31.000 | 1 | 1_Testes_ARID4B: |
| 1_Testes_ARID4B: 44098, -142            | downstream, upstream     | 1 | 28.000 | 2 | 1_Testes_ARID4B: |
| 1_Testes_ARID4B:                        | 62 in gene               | 1 | 25.000 | 1 | 1_Testes_ARID4B: |
| 1_Testes_ARID4B: 148154, 458            | downstream, in gene      | 1 | 25.000 | 2 | 1_Testes_ARID4B: |
| 1_Testes_ARID4B:                        | 268 in gene              | 1 | 27.000 | 1 | 1_Testes_ARID4B: |
| 1_Testes_ARID4B:                        | 8 in gene                | 1 | 21.000 | 1 | 1_Testes_ARID4B: |
| 1_Testes_ARID4B:                        | -54 upstream             | 1 | 21.000 | 1 | 1_Testes_ARID4B: |
| 1_Testes_ARID4B:                        | 530 in gene              | 1 | 29.000 | 1 | 1_Testes_ARID4B: |
| 1_Testes_ARID4B: 1848, 400              | in gene, in gene         | 1 | 25.500 | 2 | 1_Testes_ARID4B: |
| 1_Testes_ARID4B: 267, 1715              | in gene, in gene         | 1 | 25.500 | 2 | 1_Testes_ARID4B: |
| 1_Testes_ARID4B: 403, 2659              | in gene, in gene         | 1 | 23.500 | 2 | 1_Testes_ARID4B: |
| 1_Testes_ARID4B: 70535, 183             | in gene, in gene         | 1 | 20.000 | 2 | 1_Testes_ARID4B: |
| 1_Testes_ARID4B:                        | 351 in gene              | 1 | 31.000 | 1 | 1_Testes_ARID4B: |
| 1_Testes_ARID4B:                        | 252 in gene              | 1 | 27.000 | 1 | 1_Testes_ARID4B: |
| 1_Testes_ARID4B:                        | 105 in gene              | 1 | 31.000 | 1 | 1_Testes_ARID4B: |
| 1_Testes_ARID4B:                        | 250996 in gene           | 1 | 21.000 | 1 | 1_Testes_ARID4B: |
| 1_Testes_ARID4B:                        | 116 in gene              | 1 | 21.000 | 1 | 1_Testes_ARID4B: |
| 1_Testes_ARID4B: 467, -333              | in gene, upstream        | 1 | 30.500 | 2 | 1_Testes_ARID4B: |
| 1_Testes_ARID4B:                        | -604 upstream            | 1 | 26.000 | 1 | 1_Testes_ARID4B: |
| 1_Testes_ARID4B:                        | 202 in gene              | 1 | 22.000 | 1 | 1_Testes_ARID4B: |
| 1_Testes_ARID4B:                        | -41 upstream             | 1 | 22.000 | 1 | 1_Testes_ARID4B: |
| 1_Testes_ARID4B:                        | -5719 upstream           | 1 | 22.000 | 1 | 1_Testes_ARID4B: |
| 1_Testes_ARID4B:                        | -445 upstream            | 1 | 19.000 | 1 | 1_Testes_ARID4B: |
| 1_Testes_ARID4B:                        | 666 in gene              | 1 | 38.000 | 1 | 1_Testes_ARID4B: |
| 1_Testes_ARID4B:                        | 94652 downstream         | 1 | 38.000 | 1 | 1_Testes_ARID4B: |
| 1_Testes_ARID4B:                        | 328 in gene              | 1 | 30.000 | 1 | 1_Testes_ARID4B: |
| 1_Testes_ARID4B:                        | -62 upstream             | 1 | 29.000 | 1 | 1_Testes_ARID4B: |
| 1_Testes_ARID4B: 11154, 114, -10382     | downstream, in gene, u   | 1 | 37.000 | 3 | 1_Testes_ARID4B: |
| 1_Testes_ARID4B: 9181, -1315            | downstream, upstream     | 1 | 41.000 | 2 | 1_Testes_ARID4B: |
| 1_Testes_ARID4B: 28867, 11795           | downstream, in gene      | 1 | 29.000 | 2 | 1_Testes_ARID4B: |
| 1_Testes_ARID4B: 50450, 31794, 25202, 1 | in gene, in gene, in gen | 1 | 23.200 | 5 | 1_Testes_ARID4B: |
| 1_Testes_ARID4B:                        | 9497 downstream          | 1 | 21.000 | 1 | 1_Testes_ARID4B: |
| 1_Testes_ARID4B: 13776, 11035, -3520    | downstream, downstre     | 1 | 21.000 | 3 | 1_Testes_ARID4B: |
| 1_Testes_ARID4B:                        | 153 in gene              | 1 | 21.000 | 1 | 1_Testes_ARID4B: |
| 1_Testes_ARID4B:                        | 2235 in gene             | 1 | 21.000 | 1 | 1_Testes_ARID4B: |
| 1_Testes_ARID4B: -1662, 12770           | upstream, downstream     | 1 | 24.500 | 2 | 1_Testes_ARID4B: |
| 1_Testes_ARID4B:                        | 541 in gene              | 1 | 28.000 | 1 | 1_Testes_ARID4B: |
| 1_Testes_ARID4B:                        | 7046 downstream          | 1 | 28.000 | 1 | 1_Testes_ARID4B: |
| 1_Testes_ARID4B:                        | -7230 upstream           | 1 | 28.000 | 1 | 1_Testes_ARID4B: |
| 1_Testes_ARID4B: 222, 11678             | in gene, downstream      | 1 | 25.500 | 2 | 1_Testes_ARID4B: |

|                                     |                          |   |        |   |                  |
|-------------------------------------|--------------------------|---|--------|---|------------------|
| 1_Testes_ARID4B: 5818, -5638        | downstream, upstream     | 1 | 25.500 | 2 | 1_Testes_ARID4B: |
| 1_Testes_ARID4B: 63, 73679, 77439   | in gene, downstream, c   | 1 | 21.667 | 3 | 1_Testes_ARID4B: |
| 1_Testes_ARID4B: 23077, 19317, -203 | in gene, in gene, upstre | 1 | 25.667 | 3 | 1_Testes_ARID4B: |
| 1_Testes_ARID4B: -3246, 514         | upstream, in gene        | 1 | 22.500 | 2 | 1_Testes_ARID4B: |
| 1_Testes_ARID4B:                    | 27 in gene               | 1 | 32.000 | 1 | 1_Testes_ARID4B: |
| 1_Testes_ARID4B:                    | -7414 upstream           | 1 | 24.000 | 1 | 1_Testes_ARID4B: |
| 1_Testes_ARID4B: 2897, -1231        | in gene, upstream        | 1 | 25.000 | 2 | 1_Testes_ARID4B: |
| 1_Testes_ARID4B: 12006, -3146       | downstream, upstream     | 1 | 32.000 | 2 | 1_Testes_ARID4B: |
| 1_Testes_ARID4B:                    | 234 in gene              | 1 | 38.000 | 1 | 1_Testes_ARID4B: |
| 1_Testes_ARID4B:                    | -431 upstream            | 1 | 38.000 | 1 | 1_Testes_ARID4B: |
| 1_Testes_ARID4B:                    | 3756 in gene             | 1 | 25.000 | 1 | 1_Testes_ARID4B: |
| 1_Testes_ARID4B: -4289, 11263       | upstream, downstream     | 1 | 23.500 | 2 | 1_Testes_ARID4B: |
| 1_Testes_ARID4B:                    | -2031 upstream           | 1 | 22.000 | 1 | 1_Testes_ARID4B: |
| 1_Testes_ARID4B:                    | 224 in gene              | 1 | 22.000 | 1 | 1_Testes_ARID4B: |
| 1_Testes_ARID4B:                    | 9226 downstream          | 1 | 27.000 | 1 | 1_Testes_ARID4B: |
| 1_Testes_ARID4B:                    | -209 upstream            | 1 | 27.000 | 1 | 1_Testes_ARID4B: |
| 1_Testes_ARID4B: 28, 11916          | in gene, downstream      | 1 | 26.500 | 2 | 1_Testes_ARID4B: |
| 1_Testes_ARID4B: 11405, -483        | downstream, upstream     | 1 | 26.500 | 2 | 1_Testes_ARID4B: |
| 1_Testes_ARID4B:                    | 1189 in gene             | 1 | 26.000 | 1 | 1_Testes_ARID4B: |
| 1_Testes_ARID4B: 95514, 458         | downstream, in gene      | 1 | 26.000 | 2 | 1_Testes_ARID4B: |
| 1_Testes_ARID4B:                    | 20660 downstream         | 1 | 19.000 | 1 | 1_Testes_ARID4B: |
| 1_Testes_ARID4B: -5, 4283           | upstream, downstream     | 1 | 34.500 | 2 | 1_Testes_ARID4B: |
| 1_Testes_ARID4B: -4135, 153         | upstream, in gene        | 1 | 34.500 | 2 | 1_Testes_ARID4B: |
| 1_Testes_ARID4B: 21224, -248        | downstream, upstream     | 1 | 35.000 | 2 | 1_Testes_ARID4B: |
| 1_Testes_ARID4B:                    | 461 in gene              | 1 | 24.000 | 1 | 1_Testes_ARID4B: |
| 1_Testes_ARID4B:                    | -8003 upstream           | 1 | 21.000 | 1 | 1_Testes_ARID4B: |
| 1_Testes_ARID4B: 78883, 195         | in gene, in gene         | 1 | 30.000 | 2 | 1_Testes_ARID4B: |
| 1_Testes_ARID4B:                    | 18 in gene               | 1 | 23.000 | 1 | 1_Testes_ARID4B: |
| 1_Testes_ARID4B: 14120, 264         | downstream, in gene      | 1 | 30.500 | 2 | 1_Testes_ARID4B: |
| 1_Testes_ARID4B:                    | -656 upstream            | 1 | 30.000 | 1 | 1_Testes_ARID4B: |
| 1_Testes_ARID4B:                    | -9832 upstream           | 1 | 23.000 | 1 | 1_Testes_ARID4B: |
| 1_Testes_ARID4B: 115, -4605         | in gene, upstream        | 1 | 23.500 | 2 | 1_Testes_ARID4B: |
| 1_Testes_ARID4B: -968, 3752         | upstream, in gene        | 1 | 23.500 | 2 | 1_Testes_ARID4B: |
| 1_Testes_ARID4B: 220, 8300          | in gene, in gene         | 1 | 25.500 | 2 | 1_Testes_ARID4B: |
| 1_Testes_ARID4B:                    | 31706 downstream         | 1 | 26.000 | 1 | 1_Testes_ARID4B: |
| 1_Testes_ARID4B: 44417, -468        | in gene, upstream        | 1 | 16.500 | 2 | 1_Testes_ARID4B: |
| 1_Testes_ARID4B:                    | 233 in gene              | 1 | 24.000 | 1 | 1_Testes_ARID4B: |
| 1_Testes_ARID4B:                    | 12649 downstream         | 1 | 24.000 | 1 | 1_Testes_ARID4B: |
| 1_Testes_ARID4B: 266, 22730         | in gene, downstream      | 1 | 25.000 | 2 | 1_Testes_ARID4B: |
| 1_Testes_ARID4B:                    | -208 upstream            | 1 | 30.000 | 1 | 1_Testes_ARID4B: |
| 1_Testes_ARID4B: 134, 14358         | in gene, downstream      | 1 | 26.500 | 2 | 1_Testes_ARID4B: |
| 1_Testes_ARID4B: 225, 13569         | in gene, downstream      | 1 | 24.500 | 2 | 1_Testes_ARID4B: |
| 1_Testes_ARID4B:                    | 763 in gene              | 1 | 26.000 | 1 | 1_Testes_ARID4B: |
| 1_Testes_ARID4B:                    | -7445 upstream           | 1 | 26.000 | 1 | 1_Testes_ARID4B: |
| 1_Testes_ARID4B:                    | 35572 in gene            | 1 | 23.000 | 1 | 1_Testes_ARID4B: |
| 1_Testes_ARID4B: -2542, -4958       | upstream, upstream       | 1 | 33.500 | 2 | 1_Testes_ARID4B: |
| 1_Testes_ARID4B: 284, 2700          | in gene, downstream      | 1 | 33.500 | 2 | 1_Testes_ARID4B: |

|                                   |                          |          |                    |
|-----------------------------------|--------------------------|----------|--------------------|
| 1_Testes_ARID4B: -2378, 38        | upstream, in gene        | 1 33.500 | 2 1_Testes_ARID4B: |
| 1_Testes_ARID4B:                  | 89 in gene               | 1 27.000 | 1 1_Testes_ARID4B: |
| 1_Testes_ARID4B:                  | 329 in gene              | 1 28.000 | 1 1_Testes_ARID4B: |
| 1_Testes_ARID4B:                  | 970 in gene              | 1 26.000 | 1 1_Testes_ARID4B: |
| 1_Testes_ARID4B:                  | -2546 upstream           | 1 26.000 | 1 1_Testes_ARID4B: |
| 1_Testes_ARID4B: 18, 9954         | in gene, in gene         | 1 25.000 | 2 1_Testes_ARID4B: |
| 1_Testes_ARID4B: 45671, -201      | downstream, upstream     | 1 22.500 | 2 1_Testes_ARID4B: |
| 1_Testes_ARID4B:                  | -7 upstream              | 1 20.000 | 1 1_Testes_ARID4B: |
| 1_Testes_ARID4B:                  | 200 in gene              | 1 23.000 | 1 1_Testes_ARID4B: |
| 1_Testes_ARID4B:                  | -84 upstream             | 1 26.000 | 1 1_Testes_ARID4B: |
| 1_Testes_ARID4B:                  | -187 upstream            | 1 26.000 | 1 1_Testes_ARID4B: |
| 1_Testes_ARID4B: 320, -3392       | in gene, upstream        | 1 32.000 | 2 1_Testes_ARID4B: |
| 1_Testes_ARID4B: 4833, 1121       | downstream, in gene      | 1 32.000 | 2 1_Testes_ARID4B: |
| 1_Testes_ARID4B: -3344, 368       | upstream, in gene        | 1 32.000 | 2 1_Testes_ARID4B: |
| 1_Testes_ARID4B:                  | 472 in gene              | 1 20.000 | 1 1_Testes_ARID4B: |
| 1_Testes_ARID4B:                  | -634 upstream            | 1 20.000 | 1 1_Testes_ARID4B: |
| 1_Testes_ARID4B: 30205, 5533, 605 | in gene, in gene, in gen | 1 20.000 | 3 1_Testes_ARID4B: |
| 1_Testes_ARID4B:                  | 581 in gene              | 1 17.000 | 1 1_Testes_ARID4B: |
| 1_Testes_ARID4B: 5533, 605        | in gene, in gene         | 1 21.500 | 2 1_Testes_ARID4B: |
| 1_Testes_ARID4B:                  | -9435 upstream           | 1 23.000 | 1 1_Testes_ARID4B: |
| 1_Testes_ARID4B:                  | 1912 in gene             | 1 23.000 | 1 1_Testes_ARID4B: |
| 1_Testes_ARID4B:                  | -295 upstream            | 1 23.000 | 1 1_Testes_ARID4B: |
| 1_Testes_ARID4B:                  | 559 in gene              | 1 35.000 | 1 1_Testes_ARID4B: |
| 1_Testes_ARID4B:                  | 29369 downstream         | 1 23.000 | 1 1_Testes_ARID4B: |
| 1_Testes_ARID4B:                  | 123 in gene              | 1 23.000 | 1 1_Testes_ARID4B: |
| 1_Testes_ARID4B:                  | 517 in gene              | 1 24.000 | 1 1_Testes_ARID4B: |
| 1_Testes_ARID4B:                  | -613 upstream            | 1 24.000 | 1 1_Testes_ARID4B: |
| 1_Testes_ARID4B:                  | -402 upstream            | 1 19.000 | 1 1_Testes_ARID4B: |
| 1_Testes_ARID4B:                  | -92 upstream             | 1 19.000 | 1 1_Testes_ARID4B: |
| 1_Testes_ARID4B:                  | 8177 downstream          | 1 19.000 | 1 1_Testes_ARID4B: |
| 1_Testes_ARID4B:                  | 58 in gene               | 1 41.000 | 1 1_Testes_ARID4B: |
| 1_Testes_ARID4B:                  | 30144 downstream         | 1 23.000 | 1 1_Testes_ARID4B: |
| 1_Testes_ARID4B:                  | 3207 in gene             | 1 23.000 | 1 1_Testes_ARID4B: |
| 1_Testes_ARID4B: 35839, 223       | downstream, in gene      | 1 29.500 | 2 1_Testes_ARID4B: |
| 1_Testes_ARID4B: 912, 31888       | in gene, in gene         | 1 21.500 | 2 1_Testes_ARID4B: |
| 1_Testes_ARID4B:                  | -8891 upstream           | 1 31.000 | 1 1_Testes_ARID4B: |
| 1_Testes_ARID4B:                  | 8831 in gene             | 1 31.000 | 1 1_Testes_ARID4B: |
| 1_Testes_ARID4B:                  | 214 in gene              | 1 30.000 | 1 1_Testes_ARID4B: |
| 1_Testes_ARID4B:                  | 13780 downstream         | 1 30.000 | 1 1_Testes_ARID4B: |
| 1_Testes_ARID4B:                  | 117 in gene              | 1 19.000 | 1 1_Testes_ARID4B: |
| 1_Testes_ARID4B:                  | 23753 downstream         | 1 31.000 | 1 1_Testes_ARID4B: |
| 1_Testes_ARID4B:                  | 355 in gene              | 1 31.000 | 1 1_Testes_ARID4B: |
| 1_Testes_ARID4B:                  | 31023 downstream         | 1 28.000 | 1 1_Testes_ARID4B: |
| 1_Testes_ARID4B:                  | 206 in gene              | 1 28.000 | 1 1_Testes_ARID4B: |
| 1_Testes_ARID4B:                  | 57691 downstream         | 1 34.000 | 1 1_Testes_ARID4B: |
| 1_Testes_ARID4B: -114, 19822      | upstream, downstream     | 1 28.500 | 2 1_Testes_ARID4B: |
| 1_Testes_ARID4B:                  | 475 in gene              | 1 23.000 | 1 1_Testes_ARID4B: |

|                                    |                          |   |        |   |                  |
|------------------------------------|--------------------------|---|--------|---|------------------|
| 1_Testes_ARID4B: 9035, 107         | in gene, in gene         | 1 | 28.000 | 2 | 1_Testes_ARID4B: |
| 1_Testes_ARID4B:                   | -7757 upstream           | 1 | 40.000 | 1 | 1_Testes_ARID4B: |
| 1_Testes_ARID4B:                   | 13062 in gene            | 1 | 31.000 | 1 | 1_Testes_ARID4B: |
| 1_Testes_ARID4B:                   | -611 upstream            | 1 | 31.000 | 1 | 1_Testes_ARID4B: |
| 1_Testes_ARID4B:                   | -8 upstream              | 1 | 31.000 | 1 | 1_Testes_ARID4B: |
| 1_Testes_ARID4B:                   | 22275 downstream         | 1 | 22.000 | 1 | 1_Testes_ARID4B: |
| 1_Testes_ARID4B:                   | 321 in gene              | 1 | 22.000 | 1 | 1_Testes_ARID4B: |
| 1_Testes_ARID4B:                   | 26856 downstream         | 1 | 22.000 | 1 | 1_Testes_ARID4B: |
| 1_Testes_ARID4B:                   | 295 in gene              | 1 | 23.000 | 1 | 1_Testes_ARID4B: |
| 1_Testes_ARID4B:                   | 17345 downstream         | 1 | 23.000 | 1 | 1_Testes_ARID4B: |
| 1_Testes_ARID4B:                   | 110 in gene              | 1 | 24.000 | 1 | 1_Testes_ARID4B: |
| 1_Testes_ARID4B:                   | -8140 upstream           | 1 | 21.000 | 1 | 1_Testes_ARID4B: |
| 1_Testes_ARID4B:                   | 278 in gene              | 1 | 21.000 | 1 | 1_Testes_ARID4B: |
| 1_Testes_ARID4B:                   | 85 in gene               | 1 | 26.000 | 1 | 1_Testes_ARID4B: |
| 1_Testes_ARID4B: 129949, 349       | downstream, in gene      | 1 | 23.500 | 2 | 1_Testes_ARID4B: |
| 1_Testes_ARID4B:                   | 191 in gene              | 1 | 36.000 | 1 | 1_Testes_ARID4B: |
| 1_Testes_ARID4B:                   | 1505 in gene             | 1 | 24.000 | 1 | 1_Testes_ARID4B: |
| 1_Testes_ARID4B:                   | 332 in gene              | 1 | 24.000 | 1 | 1_Testes_ARID4B: |
| 1_Testes_ARID4B:                   | 387 in gene              | 1 | 23.000 | 1 | 1_Testes_ARID4B: |
| 1_Testes_ARID4B:                   | 104 in gene              | 1 | 24.000 | 1 | 1_Testes_ARID4B: |
| 1_Testes_ARID4B:                   | 163 in gene              | 1 | 29.000 | 1 | 1_Testes_ARID4B: |
| 1_Testes_ARID4B:                   | 61 in gene               | 1 | 19.000 | 1 | 1_Testes_ARID4B: |
| 1_Testes_ARID4B:                   | 618 in gene              | 1 | 19.000 | 1 | 1_Testes_ARID4B: |
| 1_Testes_ARID4B:                   | 628 in gene              | 1 | 20.000 | 1 | 1_Testes_ARID4B: |
| 1_Testes_ARID4B:                   | 19749 downstream         | 1 | 23.000 | 1 | 1_Testes_ARID4B: |
| 1_Testes_ARID4B:                   | 129 in gene              | 1 | 23.000 | 1 | 1_Testes_ARID4B: |
| 1_Testes_ARID4B:                   | 961 in gene              | 1 | 24.000 | 1 | 1_Testes_ARID4B: |
| 1_Testes_ARID4B:                   | 1345 in gene             | 1 | 27.000 | 1 | 1_Testes_ARID4B: |
| 1_Testes_ARID4B:                   | 173 in gene              | 1 | 23.000 | 1 | 1_Testes_ARID4B: |
| 1_Testes_ARID4B:                   | 21 in gene               | 1 | 26.000 | 1 | 1_Testes_ARID4B: |
| 1_Testes_ARID4B:                   | 81365 in gene            | 1 | 30.000 | 1 | 1_Testes_ARID4B: |
| 1_Testes_ARID4B: 4923, 859         | in gene, in gene         | 1 | 25.000 | 2 | 1_Testes_ARID4B: |
| 1_Testes_ARID4B:                   | 385 in gene              | 1 | 25.000 | 1 | 1_Testes_ARID4B: |
| 1_Testes_ARID4B:                   | -650 upstream            | 1 | 26.000 | 1 | 1_Testes_ARID4B: |
| 1_Testes_ARID4B:                   | 322 in gene              | 1 | 26.000 | 1 | 1_Testes_ARID4B: |
| 1_Testes_ARID4B:                   | 366 in gene              | 1 | 43.000 | 1 | 1_Testes_ARID4B: |
| 1_Testes_ARID4B: 15858, 16690      | downstream, downstre     | 1 | 20.500 | 2 | 1_Testes_ARID4B: |
| 1_Testes_ARID4B: 270, -562         | in gene, upstream        | 1 | 20.500 | 2 | 1_Testes_ARID4B: |
| 1_Testes_ARID4B: -480, 352, 13195  | upstream, in gene, dow   | 1 | 22.333 | 3 | 1_Testes_ARID4B: |
| 1_Testes_ARID4B:                   | 152 in gene              | 1 | 26.000 | 1 | 1_Testes_ARID4B: |
| 1_Testes_ARID4B:                   | 33891 downstream         | 1 | 26.000 | 1 | 1_Testes_ARID4B: |
| 1_Testes_ARID4B:                   | -6149 upstream           | 1 | 19.000 | 1 | 1_Testes_ARID4B: |
| 1_Testes_ARID4B: 25033, 7508, 244  | in gene, in gene, in gen | 1 | 24.667 | 3 | 1_Testes_ARID4B: |
| 1_Testes_ARID4B: 23194, 15930, 234 | downstream, downstre     | 1 | 28.333 | 3 | 1_Testes_ARID4B: |
| 1_Testes_ARID4B:                   | 281 in gene              | 1 | 28.000 | 1 | 1_Testes_ARID4B: |
| 1_Testes_ARID4B:                   | 703 in gene              | 1 | 15.000 | 1 | 1_Testes_ARID4B: |
| 1_Testes_ARID4B:                   | 147 in gene              | 1 | 19.000 | 1 | 1_Testes_ARID4B: |

|                                         |                         |   |        |   |                  |
|-----------------------------------------|-------------------------|---|--------|---|------------------|
| 1_Testes_ARID4B:                        | 316 in gene             | 1 | 26.000 | 1 | 1_Testes_ARID4B: |
| 1_Testes_ARID4B:                        | 109 in gene             | 1 | 28.000 | 1 | 1_Testes_ARID4B: |
| 1_Testes_ARID4B:                        | 50 in gene              | 1 | 26.000 | 1 | 1_Testes_ARID4B: |
| 1_Testes_ARID4B:                        | -110 upstream           | 1 | 26.000 | 1 | 1_Testes_ARID4B: |
| 1_Testes_ARID4B: 76755, 339             | in gene, in gene        | 1 | 34.000 | 2 | 1_Testes_ARID4B: |
| 1_Testes_ARID4B:                        | 222 in gene             | 1 | 18.000 | 1 | 1_Testes_ARID4B: |
| 1_Testes_ARID4B:                        | 192 in gene             | 1 | 27.000 | 1 | 1_Testes_ARID4B: |
| 1_Testes_ARID4B:                        | 290 in gene             | 1 | 18.000 | 1 | 1_Testes_ARID4B: |
| 1_Testes_ARID4B:                        | 634 in gene             | 1 | 34.000 | 1 | 1_Testes_ARID4B: |
| 1_Testes_ARID4B:                        | 165 in gene             | 1 | 34.000 | 1 | 1_Testes_ARID4B: |
| 1_Testes_ARID4B:                        | -9669 upstream          | 1 | 23.000 | 1 | 1_Testes_ARID4B: |
| 1_Testes_ARID4B: -2578, 318             | upstream, in gene       | 1 | 22.000 | 2 | 1_Testes_ARID4B: |
| 1_Testes_ARID4B:                        | 635 in gene             | 1 | 29.000 | 1 | 1_Testes_ARID4B: |
| 1_Testes_ARID4B:                        | 209 in gene             | 1 | 37.000 | 1 | 1_Testes_ARID4B: |
| 1_Testes_ARID4B:                        | -110 upstream           | 1 | 23.000 | 1 | 1_Testes_ARID4B: |
| 1_Testes_ARID4B:                        | 158 in gene             | 1 | 20.000 | 1 | 1_Testes_ARID4B: |
| 1_Testes_ARID4B:                        | 25741 downstream        | 1 | 20.000 | 1 | 1_Testes_ARID4B: |
| 1_Testes_ARID4B:                        | 91 in gene              | 1 | 17.000 | 1 | 1_Testes_ARID4B: |
| 1_Testes_ARID4B:                        | -2806 upstream          | 1 | 22.000 | 1 | 1_Testes_ARID4B: |
| 1_Testes_ARID4B:                        | 578 in gene             | 1 | 22.000 | 1 | 1_Testes_ARID4B: |
| 1_Testes_ARID4B:                        | 13 in gene              | 1 | 33.000 | 1 | 1_Testes_ARID4B: |
| 1_Testes_ARID4B:                        | -7749 upstream          | 1 | 33.000 | 1 | 1_Testes_ARID4B: |
| 1_Testes_ARID4B: 33428, 228             | downstream, in gene     | 1 | 30.500 | 2 | 1_Testes_ARID4B: |
| 1_Testes_ARID4B:                        | 84 in gene              | 1 | 28.000 | 1 | 1_Testes_ARID4B: |
| 1_Testes_ARID4B:                        | -3596 upstream          | 1 | 28.000 | 1 | 1_Testes_ARID4B: |
| 1_Testes_ARID4B:                        | -2143 upstream          | 1 | 19.000 | 1 | 1_Testes_ARID4B: |
| 1_Testes_ARID4B:                        | 2302 in gene            | 1 | 15.000 | 1 | 1_Testes_ARID4B: |
| 1_Testes_ARID4B:                        | 73 in gene              | 1 | 23.000 | 1 | 1_Testes_ARID4B: |
| 1_Testes_ARID4B:                        | 14645 downstream        | 1 | 23.000 | 1 | 1_Testes_ARID4B: |
| 1_Testes_ARID4B:                        | 142 in gene             | 1 | 41.000 | 1 | 1_Testes_ARID4B: |
| 1_Testes_ARID4B:                        | 15174 downstream        | 1 | 41.000 | 1 | 1_Testes_ARID4B: |
| 1_Testes_ARID4B:                        | 2293 in gene            | 1 | 23.000 | 1 | 1_Testes_ARID4B: |
| 1_Testes_ARID4B:                        | -1392 upstream          | 1 | 23.000 | 1 | 1_Testes_ARID4B: |
| 1_Testes_ARID4B: 25876, -23             | downstream, upstream    | 1 | 19.500 | 2 | 1_Testes_ARID4B: |
| 1_Testes_ARID4B: 39674, 13557, 8261, -7 | downstream, in gene, in | 1 | 21.750 | 4 | 1_Testes_ARID4B: |
| 1_Testes_ARID4B:                        | 9462 downstream         | 1 | 35.000 | 1 | 1_Testes_ARID4B: |
| 1_Testes_ARID4B: 4396, 460              | in gene, in gene        | 1 | 29.000 | 2 | 1_Testes_ARID4B: |
| 1_Testes_ARID4B: 23954, 20018, 178      | downstream, downstream  | 1 | 31.000 | 3 | 1_Testes_ARID4B: |
| 1_Testes_ARID4B:                        | 310 in gene             | 1 | 31.000 | 1 | 1_Testes_ARID4B: |
| 1_Testes_ARID4B:                        | 61 in gene              | 1 | 28.000 | 1 | 1_Testes_ARID4B: |
| 1_Testes_ARID4B:                        | 701 in gene             | 1 | 20.000 | 1 | 1_Testes_ARID4B: |
| 1_Testes_ARID4B:                        | 362 in gene             | 1 | 21.000 | 1 | 1_Testes_ARID4B: |
| 1_Testes_ARID4B:                        | 18819 downstream        | 1 | 20.000 | 1 | 1_Testes_ARID4B: |
| 1_Testes_ARID4B:                        | -6064 upstream          | 1 | 20.000 | 1 | 1_Testes_ARID4B: |
| 1_Testes_ARID4B:                        | -5692 upstream          | 1 | 20.000 | 1 | 1_Testes_ARID4B: |
| 1_Testes_ARID4B:                        | 16848 in gene           | 1 | 16.000 | 1 | 1_Testes_ARID4B: |
| 1_Testes_ARID4B:                        | 10137 downstream        | 1 | 16.000 | 1 | 1_Testes_ARID4B: |

|                                        |                         |   |        |   |                  |
|----------------------------------------|-------------------------|---|--------|---|------------------|
| 1_Testes_ARID4B:                       | -9964 upstream          | 1 | 16.000 | 1 | 1_Testes_ARID4B: |
| 1_Testes_ARID4B:                       | 361 in gene             | 1 | 26.000 | 1 | 1_Testes_ARID4B: |
| 1_Testes_ARID4B:                       | 362 in gene             | 1 | 24.000 | 1 | 1_Testes_ARID4B: |
| 1_Testes_ARID4B:                       | 296 in gene             | 1 | 17.000 | 1 | 1_Testes_ARID4B: |
| 1_Testes_ARID4B:                       | 179 in gene             | 1 | 25.000 | 1 | 1_Testes_ARID4B: |
| 1_Testes_ARID4B:                       | 103120 downstream       | 1 | 25.000 | 1 | 1_Testes_ARID4B: |
| 1_Testes_ARID4B:                       | 2918 in gene            | 1 | 42.000 | 1 | 1_Testes_ARID4B: |
| 1_Testes_ARID4B:                       | 295 in gene             | 1 | 42.000 | 1 | 1_Testes_ARID4B: |
| 1_Testes_ARID4B:                       | 440 in gene             | 1 | 24.000 | 1 | 1_Testes_ARID4B: |
| 1_Testes_ARID4B:                       | 239 in gene             | 1 | 36.000 | 1 | 1_Testes_ARID4B: |
| 1_Testes_ARID4B:                       | -377 upstream           | 1 | 36.000 | 1 | 1_Testes_ARID4B: |
| 1_Testes_ARID4B:                       | -218 upstream           | 1 | 33.000 | 1 | 1_Testes_ARID4B: |
| 1_Testes_ARID4B: 26423, 167            | downstream, in gene     | 1 | 32.000 | 2 | 1_Testes_ARID4B: |
| 1_Testes_ARID4B:                       | 56875 downstream        | 1 | 31.000 | 1 | 1_Testes_ARID4B: |
| 1_Testes_ARID4B:                       | -682 upstream           | 1 | 33.000 | 1 | 1_Testes_ARID4B: |
| 1_Testes_ARID4B:                       | 130 in gene             | 1 | 33.000 | 1 | 1_Testes_ARID4B: |
| 1_Testes_ARID4B:                       | 21073 downstream        | 1 | 33.000 | 1 | 1_Testes_ARID4B: |
| 1_Testes_ARID4B: 176149, 182645, 18344 | downstream, downstre    | 1 | 19.667 | 3 | 1_Testes_ARID4B: |
| 1_Testes_ARID4B: 7567, 1071, 271       | downstream, in gene, ii | 1 | 19.667 | 3 | 1_Testes_ARID4B: |
| 1_Testes_ARID4B:                       | 13162 downstream        | 1 | 21.000 | 1 | 1_Testes_ARID4B: |
| 1_Testes_ARID4B:                       | 380 in gene             | 1 | 21.000 | 1 | 1_Testes_ARID4B: |
| 1_Testes_ARID4B:                       | 802 in gene             | 1 | 34.000 | 1 | 1_Testes_ARID4B: |
| 1_Testes_ARID4B:                       | 3137 downstream         | 1 | 34.000 | 1 | 1_Testes_ARID4B: |
| 1_Testes_ARID4B:                       | 177 in gene             | 1 | 34.000 | 1 | 1_Testes_ARID4B: |
| 1_Testes_ARID4B: 130, 17538            | in gene, downstream     | 1 | 23.000 | 2 | 1_Testes_ARID4B: |
| 1_Testes_ARID4B: 83, 9107              | in gene, downstream     | 1 | 21.500 | 2 | 1_Testes_ARID4B: |
| 1_Testes_ARID4B: -8828, 196            | upstream, in gene       | 1 | 21.500 | 2 | 1_Testes_ARID4B: |
| 1_Testes_ARID4B: 627, 26931            | in gene, downstream     | 1 | 25.000 | 2 | 1_Testes_ARID4B: |
| 1_Testes_ARID4B:                       | -3024 upstream          | 1 | 24.000 | 1 | 1_Testes_ARID4B: |
| 1_Testes_ARID4B:                       | -2284 upstream          | 1 | 26.000 | 1 | 1_Testes_ARID4B: |
| 1_Testes_ARID4B: 407, -8457            | in gene, upstream       | 1 | 29.000 | 2 | 1_Testes_ARID4B: |
| 1_Testes_ARID4B: -8378, 486            | upstream, in gene       | 1 | 29.000 | 2 | 1_Testes_ARID4B: |
| 1_Testes_ARID4B:                       | -5903 upstream          | 1 | 20.000 | 1 | 1_Testes_ARID4B: |
| 1_Testes_ARID4B:                       | 11371 in gene           | 1 | 24.000 | 1 | 1_Testes_ARID4B: |
| 1_Testes_ARID4B: 9015, 10871           | downstream, downstre    | 1 | 28.500 | 2 | 1_Testes_ARID4B: |
| 1_Testes_ARID4B: 128, 1984             | in gene, in gene        | 1 | 28.500 | 2 | 1_Testes_ARID4B: |
| 1_Testes_ARID4B: 59, 2315              | in gene, in gene        | 1 | 29.000 | 2 | 1_Testes_ARID4B: |
| 1_Testes_ARID4B:                       | -7801 upstream          | 1 | 24.000 | 1 | 1_Testes_ARID4B: |
| 1_Testes_ARID4B:                       | 7711 in gene            | 1 | 24.000 | 1 | 1_Testes_ARID4B: |
| 1_Testes_ARID4B:                       | 11774 downstream        | 1 | 20.000 | 1 | 1_Testes_ARID4B: |
| 1_Testes_ARID4B:                       | 312 in gene             | 1 | 20.000 | 1 | 1_Testes_ARID4B: |
| 1_Testes_ARID4B:                       | 597 in gene             | 1 | 18.000 | 1 | 1_Testes_ARID4B: |
| 1_Testes_ARID4B:                       | 15124 downstream        | 1 | 27.000 | 1 | 1_Testes_ARID4B: |
| 1_Testes_ARID4B:                       | 8570 downstream         | 1 | 27.000 | 1 | 1_Testes_ARID4B: |
| 1_Testes_ARID4B:                       | 4888 in gene            | 1 | 27.000 | 1 | 1_Testes_ARID4B: |
| 1_Testes_ARID4B:                       | -8619 upstream          | 1 | 27.000 | 1 | 1_Testes_ARID4B: |
| 1_Testes_ARID4B:                       | 57384 downstream        | 1 | 19.000 | 1 | 1_Testes_ARID4B: |

|                               |                     |   |        |   |                  |
|-------------------------------|---------------------|---|--------|---|------------------|
| 1_Testes_ARID4B:              | 316 in gene         | 1 | 21.000 | 1 | 1_Testes_ARID4B: |
| 1_Testes_ARID4B:              | -107 upstream       | 1 | 27.000 | 1 | 1_Testes_ARID4B: |
| 1_Testes_ARID4B:              | 210 in gene         | 1 | 30.000 | 1 | 1_Testes_ARID4B: |
| 1_Testes_ARID4B: 135804, 284  | downstream, in gene | 1 | 25.000 | 2 | 1_Testes_ARID4B: |
| 1_Testes_ARID4B:              | 15996 downstream    | 1 | 20.000 | 1 | 1_Testes_ARID4B: |
| 1_Testes_ARID4B:              | -461 upstream       | 1 | 31.000 | 1 | 1_Testes_ARID4B: |
| 1_Testes_ARID4B:              | 536 in gene         | 1 | 35.000 | 1 | 1_Testes_ARID4B: |
| 1_Testes_ARID4B:              | 887 in gene         | 1 | 26.000 | 1 | 1_Testes_ARID4B: |
| 1_Testes_ARID4B: 38184, 30909 | in gene, in gene    | 1 | 18.000 | 2 | 1_Testes_ARID4B: |
| 1_Testes_ARID4B: 1591, 8866   | in gene, in gene    | 1 | 18.000 | 2 | 1_Testes_ARID4B: |
| 1_Testes_ARID4B:              | -7405 upstream      | 1 | 27.000 | 1 | 1_Testes_ARID4B: |
| 1_Testes_ARID4B:              | 103 in gene         | 1 | 27.000 | 1 | 1_Testes_ARID4B: |
| 1_Testes_ARID4B:              | -193 upstream       | 1 | 31.000 | 1 | 1_Testes_ARID4B: |
| 1_Testes_ARID4B:              | -8988 upstream      | 1 | 42.000 | 1 | 1_Testes_ARID4B: |
| 1_Testes_ARID4B:              | 139 in gene         | 1 | 42.000 | 1 | 1_Testes_ARID4B: |
| 1_Testes_ARID4B:              | -6388 upstream      | 1 | 42.000 | 1 | 1_Testes_ARID4B: |
| 1_Testes_ARID4B:              | 205 in gene         | 1 | 24.000 | 1 | 1_Testes_ARID4B: |
| 1_Testes_ARID4B:              | -257 upstream       | 1 | 24.000 | 1 | 1_Testes_ARID4B: |
| 1_Testes_ARID4B:              | 86 in gene          | 1 | 31.000 | 1 | 1_Testes_ARID4B: |
| 1_Testes_ARID4B:              | -244 upstream       | 1 | 31.000 | 1 | 1_Testes_ARID4B: |
| 1_Testes_ARID4B:              | 268 in gene         | 1 | 35.000 | 1 | 1_Testes_ARID4B: |
| 1_Testes_ARID4B:              | 18555 downstream    | 1 | 35.000 | 1 | 1_Testes_ARID4B: |
| 1_Testes_ARID4B:              | 107 in gene         | 1 | 35.000 | 1 | 1_Testes_ARID4B: |
| 1_Testes_ARID4B:              | 22228 downstream    | 1 | 35.000 | 1 | 1_Testes_ARID4B: |
| 1_Testes_ARID4B:              | 341 in gene         | 1 | 23.000 | 1 | 1_Testes_ARID4B: |
| 1_Testes_ARID4B:              | -347 upstream       | 1 | 23.000 | 1 | 1_Testes_ARID4B: |
| 1_Testes_ARID4B:              | 121 in gene         | 1 | 26.000 | 1 | 1_Testes_ARID4B: |
| 1_Testes_ARID4B:              | -8738 upstream      | 1 | 26.000 | 1 | 1_Testes_ARID4B: |
| 1_Testes_ARID4B:              | 198 in gene         | 1 | 24.000 | 1 | 1_Testes_ARID4B: |
| 1_Testes_ARID4B:              | 428 in gene         | 1 | 42.000 | 1 | 1_Testes_ARID4B: |
| 1_Testes_ARID4B:              | 86 in gene          | 1 | 22.000 | 1 | 1_Testes_ARID4B: |
| 1_Testes_ARID4B:              | 992 in gene         | 1 | 44.000 | 1 | 1_Testes_ARID4B: |
| 1_Testes_ARID4B:              | 4111 downstream     | 1 | 44.000 | 1 | 1_Testes_ARID4B: |
| 1_Testes_ARID4B:              | 6370 downstream     | 1 | 44.000 | 1 | 1_Testes_ARID4B: |
| 1_Testes_ARID4B:              | 7553 downstream     | 1 | 44.000 | 1 | 1_Testes_ARID4B: |
| 1_Testes_ARID4B:              | 189 in gene         | 1 | 26.000 | 1 | 1_Testes_ARID4B: |
| 1_Testes_ARID4B:              | 193 in gene         | 1 | 37.000 | 1 | 1_Testes_ARID4B: |
| 1_Testes_ARID4B:              | 278 in gene         | 1 | 21.000 | 1 | 1_Testes_ARID4B: |
| 1_Testes_ARID4B:              | 67956 downstream    | 1 | 21.000 | 1 | 1_Testes_ARID4B: |
| 1_Testes_ARID4B:              | 188 in gene         | 1 | 24.000 | 1 | 1_Testes_ARID4B: |
| 1_Testes_ARID4B:              | -279 upstream       | 1 | 24.000 | 1 | 1_Testes_ARID4B: |
| 1_Testes_ARID4B:              | 501 in gene         | 1 | 38.000 | 1 | 1_Testes_ARID4B: |
| 1_Testes_ARID4B:              | 621 downstream      | 1 | 38.000 | 1 | 1_Testes_ARID4B: |
| 1_Testes_ARID4B:              | 31 in gene          | 1 | 28.000 | 1 | 1_Testes_ARID4B: |
| 1_Testes_ARID4B:              | -995 upstream       | 1 | 14.000 | 1 | 1_Testes_ARID4B: |
| 1_Testes_ARID4B:              | -5312 upstream      | 1 | 14.000 | 1 | 1_Testes_ARID4B: |
| 1_Testes_ARID4B:              | -4054 upstream      | 1 | 32.000 | 1 | 1_Testes_ARID4B: |

|                                       |                          |   |        |   |                  |
|---------------------------------------|--------------------------|---|--------|---|------------------|
| 1_Testes_ARID4B:                      | 366 in gene              | 1 | 32.000 | 1 | 1_Testes_ARID4B: |
| 1_Testes_ARID4B:                      | 204 in gene              | 1 | 32.000 | 1 | 1_Testes_ARID4B: |
| 1_Testes_ARID4B: 69, 38693            | in gene, downstream      | 1 | 28.000 | 2 | 1_Testes_ARID4B: |
| 1_Testes_ARID4B:                      | 115 in gene              | 1 | 27.000 | 1 | 1_Testes_ARID4B: |
| 1_Testes_ARID4B:                      | 223 in gene              | 1 | 37.000 | 1 | 1_Testes_ARID4B: |
| 1_Testes_ARID4B:                      | 138 in gene              | 1 | 38.000 | 1 | 1_Testes_ARID4B: |
| 1_Testes_ARID4B:                      | 259409 downstream        | 1 | 38.000 | 1 | 1_Testes_ARID4B: |
| 1_Testes_ARID4B:                      | 203 in gene              | 1 | 38.000 | 1 | 1_Testes_ARID4B: |
| 1_Testes_ARID4B: 55862, 310           | downstream, in gene      | 1 | 30.000 | 2 | 1_Testes_ARID4B: |
| 1_Testes_ARID4B:                      | -7023 upstream           | 1 | 21.000 | 1 | 1_Testes_ARID4B: |
| 1_Testes_ARID4B:                      | -1753 upstream           | 1 | 21.000 | 1 | 1_Testes_ARID4B: |
| 1_Testes_ARID4B:                      | 117 in gene              | 1 | 21.000 | 1 | 1_Testes_ARID4B: |
| 1_Testes_ARID4B:                      | 426 in gene              | 1 | 26.000 | 1 | 1_Testes_ARID4B: |
| 1_Testes_ARID4B:                      | -7086 upstream           | 1 | 29.000 | 1 | 1_Testes_ARID4B: |
| 1_Testes_ARID4B:                      | -8050 upstream           | 1 | 29.000 | 1 | 1_Testes_ARID4B: |
| 1_Testes_ARID4B:                      | -7696 upstream           | 1 | 29.000 | 1 | 1_Testes_ARID4B: |
| 1_Testes_ARID4B:                      | 191 in gene              | 1 | 29.000 | 1 | 1_Testes_ARID4B: |
| 1_Testes_ARID4B:                      | -5096 upstream           | 1 | 29.000 | 1 | 1_Testes_ARID4B: |
| 1_Testes_ARID4B:                      | 12231 downstream         | 1 | 29.000 | 1 | 1_Testes_ARID4B: |
| 1_Testes_ARID4B: 244, -7436           | in gene, upstream        | 1 | 26.000 | 2 | 1_Testes_ARID4B: |
| 1_Testes_ARID4B: -6887, 793           | upstream, in gene        | 1 | 26.000 | 2 | 1_Testes_ARID4B: |
| 1_Testes_ARID4B:                      | 141 in gene              | 1 | 25.000 | 1 | 1_Testes_ARID4B: |
| 1_Testes_ARID4B:                      | 234 in gene              | 1 | 30.000 | 1 | 1_Testes_ARID4B: |
| 1_Testes_ARID4B:                      | 80 in gene               | 1 | 30.000 | 1 | 1_Testes_ARID4B: |
| 1_Testes_ARID4B:                      | 237 in gene              | 1 | 23.000 | 1 | 1_Testes_ARID4B: |
| 1_Testes_ARID4B:                      | 21781 downstream         | 1 | 29.000 | 1 | 1_Testes_ARID4B: |
| 1_Testes_ARID4B:                      | 300 in gene              | 1 | 29.000 | 1 | 1_Testes_ARID4B: |
| 1_Testes_ARID4B:                      | 150 in gene              | 1 | 24.000 | 1 | 1_Testes_ARID4B: |
| 1_Testes_ARID4B:                      | 178 in gene              | 1 | 25.000 | 1 | 1_Testes_ARID4B: |
| 1_Testes_ARID4B: 539, 38587, 43707    | in gene, downstream, c   | 1 | 26.667 | 3 | 1_Testes_ARID4B: |
| 1_Testes_ARID4B: 926, 6046, 7198      | in gene, in gene, in gen | 1 | 24.000 | 3 | 1_Testes_ARID4B: |
| 1_Testes_ARID4B:                      | 1105 in gene             | 1 | 18.000 | 1 | 1_Testes_ARID4B: |
| 1_Testes_ARID4B:                      | 3962 downstream          | 1 | 18.000 | 1 | 1_Testes_ARID4B: |
| 1_Testes_ARID4B: 57504, 176           | downstream, in gene      | 1 | 26.500 | 2 | 1_Testes_ARID4B: |
| 1_Testes_ARID4B:                      | -2651 upstream           | 1 | 35.000 | 1 | 1_Testes_ARID4B: |
| 1_Testes_ARID4B:                      | -7085 upstream           | 1 | 35.000 | 1 | 1_Testes_ARID4B: |
| 1_Testes_ARID4B:                      | 19796 downstream         | 1 | 35.000 | 1 | 1_Testes_ARID4B: |
| 1_Testes_ARID4B:                      | 491 in gene              | 1 | 24.000 | 1 | 1_Testes_ARID4B: |
| 1_Testes_ARID4B:                      | -432 upstream            | 1 | 21.000 | 1 | 1_Testes_ARID4B: |
| 1_Testes_ARID4B: 13126, 182           | downstream, in gene      | 1 | 32.000 | 2 | 1_Testes_ARID4B: |
| 1_Testes_ARID4B:                      | -371 upstream            | 1 | 43.000 | 1 | 1_Testes_ARID4B: |
| 1_Testes_ARID4B: 40656, 320           | downstream, in gene      | 1 | 33.000 | 2 | 1_Testes_ARID4B: |
| 1_Testes_ARID4B:                      | -4531 upstream           | 1 | 23.000 | 1 | 1_Testes_ARID4B: |
| 1_Testes_ARID4B:                      | 44558 in gene            | 1 | 23.000 | 1 | 1_Testes_ARID4B: |
| 1_Testes_ARID4B:                      | 176 in gene              | 1 | 28.000 | 1 | 1_Testes_ARID4B: |
| 1_Testes_ARID4B: 5289, 4313, -1031    | downstream, in gene, u   | 1 | 20.667 | 3 | 1_Testes_ARID4B: |
| 1_Testes_ARID4B: -10312, -9336, -3992 | upstream, upstream, u    | 1 | 20.667 | 3 | 1_Testes_ARID4B: |



|                                    |                        |   |        |   |                  |
|------------------------------------|------------------------|---|--------|---|------------------|
| 1_Testes_ARID4B:                   | 513 in gene            | 1 | 24.000 | 1 | 1_Testes_ARID4B: |
| 1_Testes_ARID4B:                   | 34612 downstream       | 1 | 24.000 | 1 | 1_Testes_ARID4B: |
| 1_Testes_ARID4B:                   | -899 upstream          | 1 | 31.000 | 1 | 1_Testes_ARID4B: |
| 1_Testes_ARID4B:                   | 786 in gene            | 1 | 31.000 | 1 | 1_Testes_ARID4B: |
| 1_Testes_ARID4B:                   | 1014 in gene           | 1 | 19.000 | 1 | 1_Testes_ARID4B: |
| 1_Testes_ARID4B:                   | 142 in gene            | 1 | 41.000 | 1 | 1_Testes_ARID4B: |
| 1_Testes_ARID4B:                   | 153 in gene            | 1 | 33.000 | 1 | 1_Testes_ARID4B: |
| 1_Testes_ARID4B:                   | 186 in gene            | 1 | 34.000 | 1 | 1_Testes_ARID4B: |
| 1_Testes_ARID4B:                   | 23228 downstream       | 1 | 34.000 | 1 | 1_Testes_ARID4B: |
| 1_Testes_ARID4B:                   | 474 in gene            | 1 | 22.000 | 1 | 1_Testes_ARID4B: |
| 1_Testes_ARID4B:                   | 18623 downstream       | 1 | 24.000 | 1 | 1_Testes_ARID4B: |
| 1_Testes_ARID4B:                   | 326 in gene            | 1 | 24.000 | 1 | 1_Testes_ARID4B: |
| 1_Testes_ARID4B:                   | 376 in gene            | 1 | 24.000 | 1 | 1_Testes_ARID4B: |
| 1_Testes_ARID4B:                   | -10275 upstream        | 1 | 28.000 | 1 | 1_Testes_ARID4B: |
| 1_Testes_ARID4B:                   | 9423 in gene           | 1 | 28.000 | 1 | 1_Testes_ARID4B: |
| 1_Testes_ARID4B:                   | 254 in gene            | 1 | 28.000 | 1 | 1_Testes_ARID4B: |
| 1_Testes_ARID4B:                   | 21884 downstream       | 1 | 19.000 | 1 | 1_Testes_ARID4B: |
| 1_Testes_ARID4B: 787, 23539        | in gene, downstream    | 1 | 19.000 | 2 | 1_Testes_ARID4B: |
| 1_Testes_ARID4B:                   | 1231 in gene           | 1 | 19.000 | 1 | 1_Testes_ARID4B: |
| 1_Testes_ARID4B: 20348, 636, -1252 | downstream, in gene, u | 1 | 21.667 | 3 | 1_Testes_ARID4B: |
| 1_Testes_ARID4B: -1826, 62         | upstream, in gene      | 1 | 23.000 | 2 | 1_Testes_ARID4B: |
| 1_Testes_ARID4B: 18511, 16623, 911 | downstream, downstre   | 1 | 21.667 | 3 | 1_Testes_ARID4B: |
| 1_Testes_ARID4B:                   | 473 in gene            | 1 | 19.000 | 1 | 1_Testes_ARID4B: |
| 1_Testes_ARID4B:                   | 425 in gene            | 1 | 31.000 | 1 | 1_Testes_ARID4B: |
| 1_Testes_ARID4B:                   | 112 in gene            | 1 | 18.000 | 1 | 1_Testes_ARID4B: |
| 1_Testes_ARID4B:                   | 48102 downstream       | 1 | 18.000 | 1 | 1_Testes_ARID4B: |
| 1_Testes_ARID4B: 1635, 451         | in gene, in gene       | 1 | 23.500 | 2 | 1_Testes_ARID4B: |
| 1_Testes_ARID4B:                   | 649 in gene            | 1 | 30.000 | 1 | 1_Testes_ARID4B: |
| 1_Testes_ARID4B:                   | 93 in gene             | 1 | 26.000 | 1 | 1_Testes_ARID4B: |
| 1_Testes_ARID4B:                   | 841 in gene            | 1 | 35.000 | 1 | 1_Testes_ARID4B: |
| 1_Testes_ARID4B:                   | -633 upstream          | 1 | 35.000 | 1 | 1_Testes_ARID4B: |
| 1_Testes_ARID4B:                   | -2450 upstream         | 1 | 35.000 | 1 | 1_Testes_ARID4B: |
| 1_Testes_ARID4B:                   | 19410 downstream       | 1 | 35.000 | 1 | 1_Testes_ARID4B: |
| 1_Testes_ARID4B:                   | 68 in gene             | 1 | 16.000 | 1 | 1_Testes_ARID4B: |
| 1_Testes_ARID4B:                   | 136 in gene            | 1 | 30.000 | 1 | 1_Testes_ARID4B: |
| 1_Testes_ARID4B:                   | -81 upstream           | 1 | 19.000 | 1 | 1_Testes_ARID4B: |
| 1_Testes_ARID4B:                   | 306930 in gene         | 1 | 22.000 | 1 | 1_Testes_ARID4B: |
| 1_Testes_ARID4B: 370, -318         | in gene, upstream      | 1 | 23.000 | 2 | 1_Testes_ARID4B: |
| 1_Testes_ARID4B:                   | 485 in gene            | 1 | 22.000 | 1 | 1_Testes_ARID4B: |
| 1_Testes_ARID4B: -973, 1555        | upstream, in gene      | 1 | 23.500 | 2 | 1_Testes_ARID4B: |
| 1_Testes_ARID4B:                   | 82 in gene             | 1 | 26.000 | 1 | 1_Testes_ARID4B: |
| 1_Testes_ARID4B:                   | 149 in gene            | 1 | 25.000 | 1 | 1_Testes_ARID4B: |
| 1_Testes_ARID4B:                   | 246 in gene            | 1 | 39.000 | 1 | 1_Testes_ARID4B: |
| 1_Testes_ARID4B:                   | 365 in gene            | 1 | 16.000 | 1 | 1_Testes_ARID4B: |
| 1_Testes_ARID4B:                   | 7239 in gene           | 1 | 29.000 | 1 | 1_Testes_ARID4B: |
| 1_Testes_ARID4B:                   | 14437 downstream       | 1 | 37.000 | 1 | 1_Testes_ARID4B: |
| 1_Testes_ARID4B:                   | 233 in gene            | 1 | 37.000 | 1 | 1_Testes_ARID4B: |

|                              |                      |   |        |   |                  |
|------------------------------|----------------------|---|--------|---|------------------|
| 1_Testes_ARID4B:             | -258 upstream        | 1 | 37.000 | 1 | 1_Testes_ARID4B: |
| 1_Testes_ARID4B:             | 279 in gene          | 1 | 21.000 | 1 | 1_Testes_ARID4B: |
| 1_Testes_ARID4B:             | 132 in gene          | 1 | 35.000 | 1 | 1_Testes_ARID4B: |
| 1_Testes_ARID4B:             | 10986 downstream     | 1 | 21.000 | 1 | 1_Testes_ARID4B: |
| 1_Testes_ARID4B:             | -233 upstream        | 1 | 21.000 | 1 | 1_Testes_ARID4B: |
| 1_Testes_ARID4B:             | 336 in gene          | 1 | 30.000 | 1 | 1_Testes_ARID4B: |
| 1_Testes_ARID4B:             | 189 in gene          | 1 | 20.000 | 1 | 1_Testes_ARID4B: |
| 1_Testes_ARID4B:             | -9202 upstream       | 1 | 33.000 | 1 | 1_Testes_ARID4B: |
| 1_Testes_ARID4B: -216, 36680 | upstream, downstream | 1 | 29.000 | 2 | 1_Testes_ARID4B: |
| 1_Testes_ARID4B:             | 364 in gene          | 1 | 25.000 | 1 | 1_Testes_ARID4B: |
| 1_Testes_ARID4B:             | -8523 upstream       | 1 | 25.000 | 1 | 1_Testes_ARID4B: |
| 1_Testes_ARID4B: -422, -6470 | upstream, upstream   | 1 | 31.000 | 2 | 1_Testes_ARID4B: |
| 1_Testes_ARID4B: 155, 6203   | in gene, downstream  | 1 | 31.000 | 2 | 1_Testes_ARID4B: |
| 1_Testes_ARID4B: -5913, 135  | upstream, in gene    | 1 | 31.000 | 2 | 1_Testes_ARID4B: |
| 1_Testes_ARID4B: 177, 66705  | in gene, downstream  | 1 | 27.500 | 2 | 1_Testes_ARID4B: |
| 1_Testes_ARID4B:             | 320 in gene          | 1 | 31.000 | 1 | 1_Testes_ARID4B: |
| 1_Testes_ARID4B:             | -640 upstream        | 1 | 23.000 | 1 | 1_Testes_ARID4B: |
| 1_Testes_ARID4B:             | 601 in gene          | 1 | 23.000 | 1 | 1_Testes_ARID4B: |
| 1_Testes_ARID4B:             | 377 in gene          | 1 | 27.000 | 1 | 1_Testes_ARID4B: |
| 1_Testes_ARID4B:             | 251 in gene          | 1 | 21.000 | 1 | 1_Testes_ARID4B: |
| 1_Testes_ARID4B:             | 547275 downstream    | 1 | 21.000 | 1 | 1_Testes_ARID4B: |
| 1_Testes_ARID4B:             | 136810 in gene       | 1 | 18.000 | 1 | 1_Testes_ARID4B: |
| 1_Testes_ARID4B:             | 139 in gene          | 1 | 25.000 | 1 | 1_Testes_ARID4B: |
| 1_Testes_ARID4B:             | -452 upstream        | 1 | 29.000 | 1 | 1_Testes_ARID4B: |
| 1_Testes_ARID4B:             | 318 in gene          | 1 | 22.000 | 1 | 1_Testes_ARID4B: |
| 1_Testes_ARID4B:             | 185 in gene          | 1 | 30.000 | 1 | 1_Testes_ARID4B: |
| 1_Testes_ARID4B: 718, 118478 | in gene, in gene     | 1 | 24.500 | 2 | 1_Testes_ARID4B: |
| 1_Testes_ARID4B: 492, -1188  | in gene, upstream    | 1 | 24.500 | 2 | 1_Testes_ARID4B: |
| 1_Testes_ARID4B: -1522, 158  | upstream, in gene    | 1 | 24.500 | 2 | 1_Testes_ARID4B: |
| 1_Testes_ARID4B:             | -229 upstream        | 1 | 34.000 | 1 | 1_Testes_ARID4B: |
| 1_Testes_ARID4B:             | 84 in gene           | 1 | 34.000 | 1 | 1_Testes_ARID4B: |
| 1_Testes_ARID4B:             | 33 in gene           | 1 | 21.000 | 1 | 1_Testes_ARID4B: |
| 1_Testes_ARID4B:             | 208 in gene          | 1 | 37.000 | 1 | 1_Testes_ARID4B: |
| 1_Testes_ARID4B:             | -404 upstream        | 1 | 38.000 | 1 | 1_Testes_ARID4B: |
| 1_Testes_ARID4B:             | 663 in gene          | 1 | 38.000 | 1 | 1_Testes_ARID4B: |
| 1_Testes_ARID4B:             | -79 upstream         | 1 | 24.000 | 1 | 1_Testes_ARID4B: |
| 1_Testes_ARID4B:             | -6165 upstream       | 1 | 24.000 | 1 | 1_Testes_ARID4B: |
| 1_Testes_ARID4B:             | 104 in gene          | 1 | 19.000 | 1 | 1_Testes_ARID4B: |
| 1_Testes_ARID4B:             | -8618 upstream       | 1 | 19.000 | 1 | 1_Testes_ARID4B: |
| 1_Testes_ARID4B:             | 171 in gene          | 1 | 20.000 | 1 | 1_Testes_ARID4B: |
| 1_Testes_ARID4B:             | 275 in gene          | 1 | 16.000 | 1 | 1_Testes_ARID4B: |
| 1_Testes_ARID4B:             | -502 upstream        | 1 | 27.000 | 1 | 1_Testes_ARID4B: |
| 1_Testes_ARID4B:             | 48393 downstream     | 1 | 27.000 | 1 | 1_Testes_ARID4B: |
| 1_Testes_ARID4B:             | -1045 upstream       | 1 | 27.000 | 1 | 1_Testes_ARID4B: |
| 1_Testes_ARID4B: 255, 33919  | in gene, downstream  | 1 | 23.000 | 2 | 1_Testes_ARID4B: |
| 1_Testes_ARID4B:             | 331 in gene          | 1 | 19.000 | 1 | 1_Testes_ARID4B: |
| 1_Testes_ARID4B:             | 279 in gene          | 1 | 23.000 | 1 | 1_Testes_ARID4B: |

|                              |                      |   |        |   |                  |
|------------------------------|----------------------|---|--------|---|------------------|
| 1_Testes_ARID4B:             | 182 in gene          | 1 | 27.000 | 1 | 1_Testes_ARID4B: |
| 1_Testes_ARID4B:             | -559 upstream        | 1 | 27.000 | 1 | 1_Testes_ARID4B: |
| 1_Testes_ARID4B:             | 179 in gene          | 1 | 28.000 | 1 | 1_Testes_ARID4B: |
| 1_Testes_ARID4B:             | -287 upstream        | 1 | 25.000 | 1 | 1_Testes_ARID4B: |
| 1_Testes_ARID4B:             | 131 in gene          | 1 | 25.000 | 1 | 1_Testes_ARID4B: |
| 1_Testes_ARID4B:             | 317 in gene          | 1 | 19.000 | 1 | 1_Testes_ARID4B: |
| 1_Testes_ARID4B:             | 84233 downstream     | 1 | 19.000 | 1 | 1_Testes_ARID4B: |
| 1_Testes_ARID4B:             | 311 in gene          | 1 | 19.000 | 1 | 1_Testes_ARID4B: |
| 1_Testes_ARID4B:             | -192 upstream        | 1 | 27.000 | 1 | 1_Testes_ARID4B: |
| 1_Testes_ARID4B:             | 116 in gene          | 1 | 27.000 | 1 | 1_Testes_ARID4B: |
| 1_Testes_ARID4B:             | 66 in gene           | 1 | 26.000 | 1 | 1_Testes_ARID4B: |
| 1_Testes_ARID4B: -214, 250   | upstream, in gene    | 1 | 23.500 | 2 | 1_Testes_ARID4B: |
| 1_Testes_ARID4B:             | 149 in gene          | 1 | 23.000 | 1 | 1_Testes_ARID4B: |
| 1_Testes_ARID4B:             | 3627 in gene         | 1 | 24.000 | 1 | 1_Testes_ARID4B: |
| 1_Testes_ARID4B:             | 387 in gene          | 1 | 33.000 | 1 | 1_Testes_ARID4B: |
| 1_Testes_ARID4B:             | 16593 in gene        | 1 | 37.000 | 1 | 1_Testes_ARID4B: |
| 1_Testes_ARID4B: 5213, 12861 | downstream, downstre | 1 | 41.500 | 2 | 1_Testes_ARID4B: |
| 1_Testes_ARID4B: 253, 7901   | in gene, downstream  | 1 | 41.500 | 2 | 1_Testes_ARID4B: |
| 1_Testes_ARID4B: 8089, 441   | downstream, in gene  | 1 | 41.500 | 2 | 1_Testes_ARID4B: |
| 1_Testes_ARID4B: -7276, 372  | upstream, in gene    | 1 | 41.500 | 2 | 1_Testes_ARID4B: |
| 1_Testes_ARID4B: 373, -7926  | in gene, upstream    | 1 | 27.000 | 2 | 1_Testes_ARID4B: |
| 1_Testes_ARID4B: 8430, 131   | downstream, in gene  | 1 | 27.000 | 2 | 1_Testes_ARID4B: |
| 1_Testes_ARID4B:             | 142 in gene          | 1 | 37.000 | 1 | 1_Testes_ARID4B: |
| 1_Testes_ARID4B:             | 164 in gene          | 1 | 39.000 | 1 | 1_Testes_ARID4B: |
| 1_Testes_ARID4B:             | -233 upstream        | 1 | 39.000 | 1 | 1_Testes_ARID4B: |
| 1_Testes_ARID4B:             | 64298 downstream     | 1 | 39.000 | 1 | 1_Testes_ARID4B: |
| 1_Testes_ARID4B:             | 457 in gene          | 1 | 23.000 | 1 | 1_Testes_ARID4B: |
| 1_Testes_ARID4B:             | 144 in gene          | 1 | 31.000 | 1 | 1_Testes_ARID4B: |
| 1_Testes_ARID4B:             | 448 in gene          | 1 | 22.000 | 1 | 1_Testes_ARID4B: |
| 1_Testes_ARID4B:             | 123 in gene          | 1 | 24.000 | 1 | 1_Testes_ARID4B: |
| 1_Testes_ARID4B:             | 15505 downstream     | 1 | 24.000 | 1 | 1_Testes_ARID4B: |
| 1_Testes_ARID4B: -508, -1052 | upstream, upstream   | 1 | 23.000 | 2 | 1_Testes_ARID4B: |
| 1_Testes_ARID4B: 75, 619     | in gene, in gene     | 1 | 23.000 | 2 | 1_Testes_ARID4B: |
| 1_Testes_ARID4B:             | -151 upstream        | 1 | 20.000 | 1 | 1_Testes_ARID4B: |
| 1_Testes_ARID4B:             | -401 upstream        | 1 | 20.000 | 1 | 1_Testes_ARID4B: |
| 1_Testes_ARID4B:             | 473 in gene          | 1 | 18.000 | 1 | 1_Testes_ARID4B: |
| 1_Testes_ARID4B:             | 211 in gene          | 1 | 22.000 | 1 | 1_Testes_ARID4B: |
| 1_Testes_ARID4B:             | -375 upstream        | 1 | 23.000 | 1 | 1_Testes_ARID4B: |
| 1_Testes_ARID4B:             | 69 in gene           | 1 | 21.000 | 1 | 1_Testes_ARID4B: |
| 1_Testes_ARID4B:             | 369 in gene          | 1 | 29.000 | 1 | 1_Testes_ARID4B: |
| 1_Testes_ARID4B:             | 144 in gene          | 1 | 28.000 | 1 | 1_Testes_ARID4B: |
| 1_Testes_ARID4B:             | -26 upstream         | 1 | 25.000 | 1 | 1_Testes_ARID4B: |
| 1_Testes_ARID4B: 181, 61333  | in gene, downstream  | 1 | 24.000 | 2 | 1_Testes_ARID4B: |
| 1_Testes_ARID4B:             | 118 in gene          | 1 | 28.000 | 1 | 1_Testes_ARID4B: |
| 1_Testes_ARID4B:             | 332 in gene          | 1 | 28.000 | 1 | 1_Testes_ARID4B: |
| 1_Testes_ARID4B:             | 203 in gene          | 1 | 42.000 | 1 | 1_Testes_ARID4B: |
| 1_Testes_ARID4B:             | 523 in gene          | 1 | 35.000 | 1 | 1_Testes_ARID4B: |

|                              |                      |          |                    |
|------------------------------|----------------------|----------|--------------------|
| 1_Testes_ARID4B: 1285, 165   | in gene, in gene     | 1 25.500 | 2 1_Testes_ARID4B: |
| 1_Testes_ARID4B:             | 215 in gene          | 1 26.000 | 1 1_Testes_ARID4B: |
| 1_Testes_ARID4B:             | 253 in gene          | 1 40.000 | 1 1_Testes_ARID4B: |
| 1_Testes_ARID4B:             | -457 upstream        | 1 40.000 | 1 1_Testes_ARID4B: |
| 1_Testes_ARID4B:             | 86 in gene           | 1 26.000 | 1 1_Testes_ARID4B: |
| 1_Testes_ARID4B:             | 1571 in gene         | 1 26.000 | 1 1_Testes_ARID4B: |
| 1_Testes_ARID4B:             | 74 in gene           | 1 29.000 | 1 1_Testes_ARID4B: |
| 1_Testes_ARID4B: 63609, 425  | downstream, in gene  | 1 33.500 | 2 1_Testes_ARID4B: |
| 1_Testes_ARID4B:             | -221 upstream        | 1 21.000 | 1 1_Testes_ARID4B: |
| 1_Testes_ARID4B:             | 173 in gene          | 1 28.000 | 1 1_Testes_ARID4B: |
| 1_Testes_ARID4B:             | 161 in gene          | 1 30.000 | 1 1_Testes_ARID4B: |
| 1_Testes_ARID4B: 76620, -212 | downstream, upstream | 1 30.000 | 2 1_Testes_ARID4B: |
| 1_Testes_ARID4B:             | 271 in gene          | 1 30.000 | 1 1_Testes_ARID4B: |
| 1_Testes_ARID4B:             | 32859 downstream     | 1 30.000 | 1 1_Testes_ARID4B: |
| 1_Testes_ARID4B:             | 1266 in gene         | 1 18.000 | 1 1_Testes_ARID4B: |
| 1_Testes_ARID4B: 177, 33713  | in gene, downstream  | 1 27.000 | 2 1_Testes_ARID4B: |
| 1_Testes_ARID4B:             | 261 in gene          | 1 20.000 | 1 1_Testes_ARID4B: |
| 1_Testes_ARID4B:             | 138 in gene          | 1 27.000 | 1 1_Testes_ARID4B: |
| 1_Testes_ARID4B:             | 400 in gene          | 1 23.000 | 1 1_Testes_ARID4B: |
| 1_Testes_ARID4B:             | -196 upstream        | 1 33.000 | 1 1_Testes_ARID4B: |
| 1_Testes_ARID4B: -656, 40944 | upstream, downstream | 1 25.000 | 2 1_Testes_ARID4B: |
| 1_Testes_ARID4B:             | -40 upstream         | 1 17.000 | 1 1_Testes_ARID4B: |
| 1_Testes_ARID4B:             | -130 upstream        | 1 17.000 | 1 1_Testes_ARID4B: |
| 1_Testes_ARID4B:             | 40034 downstream     | 1 17.000 | 1 1_Testes_ARID4B: |
| 1_Testes_ARID4B:             | 46 in gene           | 1 43.000 | 1 1_Testes_ARID4B: |
| 1_Testes_ARID4B:             | 32 in gene           | 1 43.000 | 1 1_Testes_ARID4B: |
| 1_Testes_ARID4B:             | 258 in gene          | 1 22.000 | 1 1_Testes_ARID4B: |
| 1_Testes_ARID4B:             | 127314 in gene       | 1 21.000 | 1 1_Testes_ARID4B: |
| 1_Testes_ARID4B:             | 173 in gene          | 1 26.000 | 1 1_Testes_ARID4B: |
| 1_Testes_ARID4B: 311, 52007  | in gene, downstream  | 1 23.500 | 2 1_Testes_ARID4B: |
| 1_Testes_ARID4B:             | 227 in gene          | 1 22.000 | 1 1_Testes_ARID4B: |
| 1_Testes_ARID4B:             | -300 upstream        | 1 18.000 | 1 1_Testes_ARID4B: |
| 1_Testes_ARID4B:             | 7 in gene            | 1 31.000 | 1 1_Testes_ARID4B: |
| 1_Testes_ARID4B:             | 269 in gene          | 1 31.000 | 1 1_Testes_ARID4B: |
| 1_Testes_ARID4B: -254, 658   | upstream, in gene    | 1 20.000 | 2 1_Testes_ARID4B: |
| 1_Testes_ARID4B:             | -263 upstream        | 1 34.000 | 1 1_Testes_ARID4B: |
| 1_Testes_ARID4B:             | 220 in gene          | 1 38.000 | 1 1_Testes_ARID4B: |
| 1_Testes_ARID4B:             | -468 upstream        | 1 38.000 | 1 1_Testes_ARID4B: |
| 1_Testes_ARID4B:             | 141 in gene          | 1 29.000 | 1 1_Testes_ARID4B: |
| 1_Testes_ARID4B:             | 13941 downstream     | 1 22.000 | 1 1_Testes_ARID4B: |
| 1_Testes_ARID4B: 32897, 161  | in gene, in gene     | 1 29.000 | 2 1_Testes_ARID4B: |
| 1_Testes_ARID4B:             | -8374 upstream       | 1 36.000 | 1 1_Testes_ARID4B: |
| 1_Testes_ARID4B:             | 360 in gene          | 1 21.000 | 1 1_Testes_ARID4B: |
| 1_Testes_ARID4B:             | 59 in gene           | 1 22.000 | 1 1_Testes_ARID4B: |
| 1_Testes_ARID4B: 71465, 489  | downstream, in gene  | 1 23.500 | 2 1_Testes_ARID4B: |
| 1_Testes_ARID4B: 365, -883   | in gene, upstream    | 1 22.000 | 2 1_Testes_ARID4B: |
| 1_Testes_ARID4B: -508, 740   | upstream, in gene    | 1 22.000 | 2 1_Testes_ARID4B: |

|                  |                                         |   |        |   |                  |
|------------------|-----------------------------------------|---|--------|---|------------------|
| 1_Testes_ARID4B: | 766 in gene                             | 1 | 24.000 | 1 | 1_Testes_ARID4B: |
| 1_Testes_ARID4B: | 218 in gene                             | 1 | 35.000 | 1 | 1_Testes_ARID4B: |
| 1_Testes_ARID4B: | 408 in gene                             | 1 | 35.000 | 1 | 1_Testes_ARID4B: |
| 1_Testes_ARID4B: | -452 upstream                           | 1 | 21.000 | 1 | 1_Testes_ARID4B: |
| 1_Testes_ARID4B: | 224 in gene                             | 1 | 29.000 | 1 | 1_Testes_ARID4B: |
| 1_Testes_ARID4B: | -133 upstream                           | 1 | 29.000 | 1 | 1_Testes_ARID4B: |
| 1_Testes_ARID4B: | 44 in gene                              | 1 | 29.000 | 1 | 1_Testes_ARID4B: |
| 1_Testes_ARID4B: | 124 in gene                             | 1 | 27.000 | 1 | 1_Testes_ARID4B: |
| 1_Testes_ARID4B: | 347 in gene                             | 1 | 30.000 | 1 | 1_Testes_ARID4B: |
| 1_Testes_ARID4B: | -82 upstream                            | 1 | 31.000 | 1 | 1_Testes_ARID4B: |
| 1_Testes_ARID4B: | 97 in gene                              | 1 | 31.000 | 1 | 1_Testes_ARID4B: |
| 1_Testes_ARID4B: | 970 in gene                             | 1 | 18.000 | 1 | 1_Testes_ARID4B: |
| 1_Testes_ARID4B: | -799 upstream                           | 1 | 37.000 | 1 | 1_Testes_ARID4B: |
| 1_Testes_ARID4B: | 982 in gene                             | 1 | 37.000 | 1 | 1_Testes_ARID4B: |
| 1_Testes_ARID4B: | 241 in gene                             | 1 | 37.000 | 1 | 1_Testes_ARID4B: |
| 1_Testes_ARID4B: | -4442 upstream                          | 1 | 37.000 | 1 | 1_Testes_ARID4B: |
| 1_Testes_ARID4B: | 202 in gene                             | 1 | 25.000 | 1 | 1_Testes_ARID4B: |
| 1_Testes_ARID4B: | 28193 in gene                           | 1 | 25.000 | 1 | 1_Testes_ARID4B: |
| 1_Testes_ARID4B: | -6736 upstream                          | 1 | 33.000 | 1 | 1_Testes_ARID4B: |
| 1_Testes_ARID4B: | -645 upstream                           | 1 | 33.000 | 1 | 1_Testes_ARID4B: |
| 1_Testes_ARID4B: | 271 in gene                             | 1 | 33.000 | 1 | 1_Testes_ARID4B: |
| 1_Testes_ARID4B: | -6121 upstream                          | 1 | 33.000 | 1 | 1_Testes_ARID4B: |
| 1_Testes_ARID4B: | 23660 downstream                        | 1 | 33.000 | 1 | 1_Testes_ARID4B: |
| 1_Testes_ARID4B: | 197 in gene                             | 1 | 27.000 | 1 | 1_Testes_ARID4B: |
| 1_Testes_ARID4B: | -435 upstream                           | 1 | 27.000 | 1 | 1_Testes_ARID4B: |
| 1_Testes_ARID4B: | 32011, 603, -101 downstream, in gene, u | 1 | 25.333 | 3 | 1_Testes_ARID4B: |
| 1_Testes_ARID4B: | 97 in gene                              | 1 | 32.000 | 1 | 1_Testes_ARID4B: |
| 1_Testes_ARID4B: | 1186, 178 in gene, in gene              | 1 | 26.000 | 2 | 1_Testes_ARID4B: |
| 1_Testes_ARID4B: | -333, 675 upstream, in gene             | 1 | 26.000 | 2 | 1_Testes_ARID4B: |
| 1_Testes_ARID4B: | 110 in gene                             | 1 | 39.000 | 1 | 1_Testes_ARID4B: |
| 1_Testes_ARID4B: | -140 upstream                           | 1 | 28.000 | 1 | 1_Testes_ARID4B: |
| 1_Testes_ARID4B: | 80 in gene                              | 1 | 28.000 | 1 | 1_Testes_ARID4B: |
| 1_Testes_ARID4B: | 17996 downstream                        | 1 | 28.000 | 1 | 1_Testes_ARID4B: |
| 1_Testes_ARID4B: | 5559 downstream                         | 1 | 28.000 | 1 | 1_Testes_ARID4B: |
| 1_Testes_ARID4B: | 810 in gene                             | 1 | 20.000 | 1 | 1_Testes_ARID4B: |
| 1_Testes_ARID4B: | -1772 upstream                          | 1 | 22.000 | 1 | 1_Testes_ARID4B: |
| 1_Testes_ARID4B: | 160, 27328 in gene, downstream          | 1 | 23.000 | 2 | 1_Testes_ARID4B: |
| 1_Testes_ARID4B: | 85 in gene                              | 1 | 24.000 | 1 | 1_Testes_ARID4B: |
| 1_Testes_ARID4B: | 175 in gene                             | 1 | 24.000 | 1 | 1_Testes_ARID4B: |
| 1_Testes_ARID4B: | 121 in gene                             | 1 | 24.000 | 1 | 1_Testes_ARID4B: |
| 1_Testes_ARID4B: | 122, -4246 in gene, upstream            | 1 | 21.000 | 2 | 1_Testes_ARID4B: |
| 1_Testes_ARID4B: | -407 upstream                           | 1 | 31.000 | 1 | 1_Testes_ARID4B: |
| 1_Testes_ARID4B: | -7987 upstream                          | 1 | 23.000 | 1 | 1_Testes_ARID4B: |
| 1_Testes_ARID4B: | 258 in gene                             | 1 | 23.000 | 1 | 1_Testes_ARID4B: |
| 1_Testes_ARID4B: | 22751, -3809 downstream, upstream       | 1 | 21.500 | 2 | 1_Testes_ARID4B: |
| 1_Testes_ARID4B: | 256, 13493 in gene, downstream          | 1 | 27.000 | 2 | 1_Testes_ARID4B: |
| 1_Testes_ARID4B: | 13738, 501 downstream, in gene          | 1 | 27.000 | 2 | 1_Testes_ARID4B: |

|                               |                      |   |        |   |                  |
|-------------------------------|----------------------|---|--------|---|------------------|
| 1_Testes_ARID4B:              | 6000 downstream      | 1 | 26.000 | 1 | 1_Testes_ARID4B: |
| 1_Testes_ARID4B:              | -9407 upstream       | 1 | 26.000 | 1 | 1_Testes_ARID4B: |
| 1_Testes_ARID4B:              | 487 in gene          | 1 | 22.000 | 1 | 1_Testes_ARID4B: |
| 1_Testes_ARID4B:              | 14973 downstream     | 1 | 22.000 | 1 | 1_Testes_ARID4B: |
| 1_Testes_ARID4B:              | 25613 downstream     | 1 | 20.000 | 1 | 1_Testes_ARID4B: |
| 1_Testes_ARID4B:              | 5509 downstream      | 1 | 20.000 | 1 | 1_Testes_ARID4B: |
| 1_Testes_ARID4B:              | 309 in gene          | 1 | 20.000 | 1 | 1_Testes_ARID4B: |
| 1_Testes_ARID4B:              | 6967 downstream      | 1 | 20.000 | 1 | 1_Testes_ARID4B: |
| 1_Testes_ARID4B:              | 15356 downstream     | 1 | 20.000 | 1 | 1_Testes_ARID4B: |
| 1_Testes_ARID4B:              | 429 in gene          | 1 | 19.000 | 1 | 1_Testes_ARID4B: |
| 1_Testes_ARID4B: 68538, 218   | downstream, in gene  | 1 | 28.500 | 2 | 1_Testes_ARID4B: |
| 1_Testes_ARID4B:              | -5819 upstream       | 1 | 31.000 | 1 | 1_Testes_ARID4B: |
| 1_Testes_ARID4B:              | -123 upstream        | 1 | 31.000 | 1 | 1_Testes_ARID4B: |
| 1_Testes_ARID4B: 36010, -3270 | downstream, upstream | 1 | 31.500 | 2 | 1_Testes_ARID4B: |
| 1_Testes_ARID4B:              | 555 in gene          | 1 | 32.000 | 1 | 1_Testes_ARID4B: |
| 1_Testes_ARID4B:              | 11937 downstream     | 1 | 32.000 | 1 | 1_Testes_ARID4B: |
| 1_Testes_ARID4B:              | 273 in gene          | 1 | 25.000 | 1 | 1_Testes_ARID4B: |
| 1_Testes_ARID4B:              | -4844 upstream       | 1 | 23.000 | 1 | 1_Testes_ARID4B: |
| 1_Testes_ARID4B: 50, 62802    | in gene, downstream  | 1 | 46.000 | 2 | 1_Testes_ARID4B: |
| 1_Testes_ARID4B:              | -335 upstream        | 1 | 69.000 | 1 | 1_Testes_ARID4B: |
| 1_Testes_ARID4B:              | 173 in gene          | 1 | 69.000 | 1 | 1_Testes_ARID4B: |
| 1_Testes_ARID4B:              | 503 in gene          | 1 | 50.000 | 1 | 1_Testes_ARID4B: |
| 1_Testes_ARID4B: 8102, -9850  | downstream, upstream | 1 | 43.000 | 2 | 1_Testes_ARID4B: |
| 1_Testes_ARID4B:              | -2908 upstream       | 1 | 50.000 | 1 | 1_Testes_ARID4B: |
| 1_Testes_ARID4B:              | 145 in gene          | 1 | 36.000 | 1 | 1_Testes_ARID4B: |
| 1_Testes_ARID4B:              | 194 in gene          | 1 | 31.000 | 1 | 1_Testes_ARID4B: |
| 1_Testes_ARID4B:              | -139 upstream        | 1 | 27.000 | 1 | 1_Testes_ARID4B: |
| 1_Testes_ARID4B:              | 86 in gene           | 1 | 27.000 | 1 | 1_Testes_ARID4B: |
| 1_Testes_ARID4B: 17537, 241   | downstream, in gene  | 1 | 24.500 | 2 | 1_Testes_ARID4B: |
| 1_Testes_ARID4B:              | 8361 downstream      | 1 | 22.000 | 1 | 1_Testes_ARID4B: |
| 1_Testes_ARID4B:              | 232 in gene          | 1 | 33.000 | 1 | 1_Testes_ARID4B: |
| 1_Testes_ARID4B:              | -6467 upstream       | 1 | 27.000 | 1 | 1_Testes_ARID4B: |
| 1_Testes_ARID4B:              | -260 upstream        | 1 | 27.000 | 1 | 1_Testes_ARID4B: |
| 1_Testes_ARID4B:              | 182 in gene          | 1 | 27.000 | 1 | 1_Testes_ARID4B: |
| 1_Testes_ARID4B:              | 11237 downstream     | 1 | 27.000 | 1 | 1_Testes_ARID4B: |
| 1_Testes_ARID4B:              | -2103 upstream       | 1 | 49.000 | 1 | 1_Testes_ARID4B: |
| 1_Testes_ARID4B:              | -195 upstream        | 1 | 49.000 | 1 | 1_Testes_ARID4B: |
| 1_Testes_ARID4B:              | -328 upstream        | 1 | 49.000 | 1 | 1_Testes_ARID4B: |
| 1_Testes_ARID4B:              | 97 in gene           | 1 | 49.000 | 1 | 1_Testes_ARID4B: |
| 1_Testes_ARID4B:              | -629 upstream        | 1 | 49.000 | 1 | 1_Testes_ARID4B: |
| 1_Testes_ARID4B:              | 4228 downstream      | 1 | 49.000 | 1 | 1_Testes_ARID4B: |
| 1_Testes_ARID4B:              | -7669 upstream       | 1 | 49.000 | 1 | 1_Testes_ARID4B: |
| 1_Testes_ARID4B:              | 8062 downstream      | 1 | 26.000 | 1 | 1_Testes_ARID4B: |
| 1_Testes_ARID4B: -482, -9010  | upstream, upstream   | 1 | 28.000 | 2 | 1_Testes_ARID4B: |
| 1_Testes_ARID4B: 158, 8686    | in gene, downstream  | 1 | 28.000 | 2 | 1_Testes_ARID4B: |
| 1_Testes_ARID4B: 8255, -273   | downstream, upstream | 1 | 28.000 | 2 | 1_Testes_ARID4B: |
| 1_Testes_ARID4B: -8288, 240   | upstream, in gene    | 1 | 28.000 | 2 | 1_Testes_ARID4B: |

|                                          |                        |   |        |   |                  |
|------------------------------------------|------------------------|---|--------|---|------------------|
| 1_Testes_ARID4B: -9668, -1140            | upstream, upstream     | 1 | 28.000 | 2 | 1_Testes_ARID4B: |
| 1_Testes_ARID4B:                         | 41617 downstream       | 1 | 30.000 | 1 | 1_Testes_ARID4B: |
| 1_Testes_ARID4B:                         | 95 in gene             | 1 | 33.000 | 1 | 1_Testes_ARID4B: |
| 1_Testes_ARID4B: 54702, 1358, -66        | downstream, in gene, u | 1 | 28.333 | 3 | 1_Testes_ARID4B: |
| 1_Testes_ARID4B: -2214, -790             | upstream, upstream     | 1 | 26.000 | 2 | 1_Testes_ARID4B: |
| 1_Testes_ARID4B:                         | 12792 downstream       | 1 | 29.000 | 1 | 1_Testes_ARID4B: |
| 1_Testes_ARID4B:                         | 158 in gene            | 1 | 29.000 | 1 | 1_Testes_ARID4B: |
| 1_Testes_ARID4B:                         | 4239 downstream        | 1 | 29.000 | 1 | 1_Testes_ARID4B: |
| 1_Testes_ARID4B: 400, 51504              | in gene, downstream    | 1 | 29.000 | 2 | 1_Testes_ARID4B: |
| 1_Testes_ARID4B:                         | 212 in gene            | 1 | 29.000 | 1 | 1_Testes_ARID4B: |
| 1_Testes_ARID4B:                         | -266 upstream          | 1 | 29.000 | 1 | 1_Testes_ARID4B: |
| 1_Testes_ARID4B:                         | 16460 downstream       | 1 | 29.000 | 1 | 1_Testes_ARID4B: |
| 1_Testes_ARID4B:                         | 598 in gene            | 1 | 35.000 | 1 | 1_Testes_ARID4B: |
| 1_Testes_ARID4B:                         | -412 upstream          | 1 | 35.000 | 1 | 1_Testes_ARID4B: |
| 1_Testes_ARID4B:                         | -521 upstream          | 1 | 27.000 | 1 | 1_Testes_ARID4B: |
| 1_Testes_ARID4B:                         | 494 in gene            | 1 | 38.000 | 1 | 1_Testes_ARID4B: |
| 1_Testes_ARID4B:                         | -619 upstream          | 1 | 38.000 | 1 | 1_Testes_ARID4B: |
| 1_Testes_ARID4B:                         | -8982 upstream         | 1 | 38.000 | 1 | 1_Testes_ARID4B: |
| 1_Testes_ARID4B: 451, 19971, 24163       | in gene, downstream, c | 1 | 25.000 | 3 | 1_Testes_ARID4B: |
| 1_Testes_ARID4B: 5429, 9621, 13317       | downstream, downstre   | 1 | 26.000 | 3 | 1_Testes_ARID4B: |
| 1_Testes_ARID4B: 13, 4205, 7901, 13325   | in gene, downstream, c | 1 | 24.750 | 4 | 1_Testes_ARID4B: |
| 1_Testes_ARID4B: 4305, 113, -3583, -9007 | downstream, in gene, u | 1 | 24.750 | 4 | 1_Testes_ARID4B: |
| 1_Testes_ARID4B: 8071, 3879, 183, -5241  | downstream, downstre   | 1 | 27.400 | 5 | 1_Testes_ARID4B: |
| 1_Testes_ARID4B: 15795, 11603, 7907, 24  | downstream, downstre   | 1 | 27.400 | 5 | 1_Testes_ARID4B: |
| 1_Testes_ARID4B: 24571, 19147, 17227, 1  | downstream, downstre   | 1 | 30.600 | 5 | 1_Testes_ARID4B: |
| 1_Testes_ARID4B: 7378, 354, -6878        | downstream, in gene, u | 1 | 33.000 | 3 | 1_Testes_ARID4B: |
| 1_Testes_ARID4B: -7116, 116              | upstream, in gene      | 1 | 32.500 | 2 | 1_Testes_ARID4B: |
| 1_Testes_ARID4B: 12474, 5242             | downstream, downstre   | 1 | 32.500 | 2 | 1_Testes_ARID4B: |
| 1_Testes_ARID4B: 44098, 226              | downstream, in gene    | 1 | 26.000 | 2 | 1_Testes_ARID4B: |
| 1_Testes_ARID4B:                         | 22474 downstream       | 1 | 24.000 | 1 | 1_Testes_ARID4B: |
| 1_Testes_ARID4B:                         | -151 upstream          | 1 | 37.000 | 1 | 1_Testes_ARID4B: |
| 1_Testes_ARID4B: 83513, 89               | downstream, in gene    | 1 | 30.500 | 2 | 1_Testes_ARID4B: |
| 1_Testes_ARID4B:                         | -5100 upstream         | 1 | 19.000 | 1 | 1_Testes_ARID4B: |
| 1_Testes_ARID4B:                         | 206 in gene            | 1 | 19.000 | 1 | 1_Testes_ARID4B: |
| 1_Testes_ARID4B:                         | 3993 downstream        | 1 | 19.000 | 1 | 1_Testes_ARID4B: |
| 1_Testes_ARID4B: 274, -8910              | in gene, upstream      | 1 | 35.500 | 2 | 1_Testes_ARID4B: |
| 1_Testes_ARID4B: -8942, 242              | upstream, in gene      | 1 | 35.500 | 2 | 1_Testes_ARID4B: |
| 1_Testes_ARID4B: 107, 23867              | in gene, in gene       | 1 | 19.000 | 2 | 1_Testes_ARID4B: |
| 1_Testes_ARID4B:                         | 328 in gene            | 1 | 38.000 | 1 | 1_Testes_ARID4B: |
| 1_Testes_ARID4B:                         | 152 in gene            | 1 | 26.000 | 1 | 1_Testes_ARID4B: |
| 1_Testes_ARID4B:                         | 116 in gene            | 1 | 30.000 | 1 | 1_Testes_ARID4B: |
| 1_Testes_ARID4B:                         | 382 in gene            | 1 | 32.000 | 1 | 1_Testes_ARID4B: |
| 1_Testes_ARID4B:                         | -3139 upstream         | 1 | 22.000 | 1 | 1_Testes_ARID4B: |
| 1_Testes_ARID4B:                         | 15773 downstream       | 1 | 27.000 | 1 | 1_Testes_ARID4B: |
| 1_Testes_ARID4B:                         | -263 upstream          | 1 | 27.000 | 1 | 1_Testes_ARID4B: |
| 1_Testes_ARID4B:                         | 6614 downstream        | 1 | 27.000 | 1 | 1_Testes_ARID4B: |
| 1_Testes_ARID4B: -8588, 31892            | upstream, downstream   | 1 | 26.000 | 2 | 1_Testes_ARID4B: |

|                                         |                         |   |        |   |                  |
|-----------------------------------------|-------------------------|---|--------|---|------------------|
| 1_Testes_ARID4B:                        | 165 in gene             | 1 | 25.000 | 1 | 1_Testes_ARID4B: |
| 1_Testes_ARID4B:                        | -8904 upstream          | 1 | 18.000 | 1 | 1_Testes_ARID4B: |
| 1_Testes_ARID4B: -1326, 205, 9282       | upstream, in gene, dow  | 1 | 21.000 | 3 | 1_Testes_ARID4B: |
| 1_Testes_ARID4B: 10479, 8948, -129      | downstream, downstre    | 1 | 21.000 | 3 | 1_Testes_ARID4B: |
| 1_Testes_ARID4B:                        | -164 upstream           | 1 | 28.000 | 1 | 1_Testes_ARID4B: |
| 1_Testes_ARID4B: 11626, 90              | downstream, in gene     | 1 | 36.000 | 2 | 1_Testes_ARID4B: |
| 1_Testes_ARID4B:                        | 366 in gene             | 1 | 25.000 | 1 | 1_Testes_ARID4B: |
| 1_Testes_ARID4B:                        | 16553 downstream        | 1 | 37.000 | 1 | 1_Testes_ARID4B: |
| 1_Testes_ARID4B: 133, 53189             | in gene, downstream     | 1 | 36.000 | 2 | 1_Testes_ARID4B: |
| 1_Testes_ARID4B:                        | -1972 upstream          | 1 | 35.000 | 1 | 1_Testes_ARID4B: |
| 1_Testes_ARID4B:                        | 356 in gene             | 1 | 35.000 | 1 | 1_Testes_ARID4B: |
| 1_Testes_ARID4B:                        | 34946 downstream        | 1 | 24.000 | 1 | 1_Testes_ARID4B: |
| 1_Testes_ARID4B:                        | -367 upstream           | 1 | 24.000 | 1 | 1_Testes_ARID4B: |
| 1_Testes_ARID4B:                        | 54 in gene              | 1 | 24.000 | 1 | 1_Testes_ARID4B: |
| 1_Testes_ARID4B: 15190, 19638           | downstream, downstre    | 1 | 39.500 | 2 | 1_Testes_ARID4B: |
| 1_Testes_ARID4B: 249, 4697              | in gene, downstream     | 1 | 39.500 | 2 | 1_Testes_ARID4B: |
| 1_Testes_ARID4B: 22085, 17637, 693, -33 | downstream, in gene, ii | 1 | 33.000 | 4 | 1_Testes_ARID4B: |
| 1_Testes_ARID4B: 15031, 14007           | downstream, downstre    | 1 | 26.500 | 2 | 1_Testes_ARID4B: |
| 1_Testes_ARID4B:                        | 576 in gene             | 1 | 23.000 | 1 | 1_Testes_ARID4B: |
| 1_Testes_ARID4B:                        | -5612 upstream          | 1 | 27.000 | 1 | 1_Testes_ARID4B: |
| 1_Testes_ARID4B:                        | -145 upstream           | 1 | 27.000 | 1 | 1_Testes_ARID4B: |
| 1_Testes_ARID4B:                        | -7725 upstream          | 1 | 27.000 | 1 | 1_Testes_ARID4B: |
| 1_Testes_ARID4B:                        | 86 in gene              | 1 | 25.000 | 1 | 1_Testes_ARID4B: |
| 1_Testes_ARID4B:                        | -2077 upstream          | 1 | 37.000 | 1 | 1_Testes_ARID4B: |
| 1_Testes_ARID4B:                        | 722 in gene             | 1 | 37.000 | 1 | 1_Testes_ARID4B: |
| 1_Testes_ARID4B: -230, 5434             | upstream, in gene       | 1 | 22.000 | 2 | 1_Testes_ARID4B: |
| 1_Testes_ARID4B:                        | -10426 upstream         | 1 | 25.000 | 1 | 1_Testes_ARID4B: |
| 1_Testes_ARID4B:                        | -528 upstream           | 1 | 25.000 | 1 | 1_Testes_ARID4B: |
| 1_Testes_ARID4B:                        | 321 in gene             | 1 | 26.000 | 1 | 1_Testes_ARID4B: |
| 1_Testes_ARID4B:                        | -244 upstream           | 1 | 28.000 | 1 | 1_Testes_ARID4B: |
| 1_Testes_ARID4B:                        | 3606 in gene            | 1 | 22.000 | 1 | 1_Testes_ARID4B: |
| 1_Testes_ARID4B:                        | -546 upstream           | 1 | 24.000 | 1 | 1_Testes_ARID4B: |
| 1_Testes_ARID4B:                        | -5245 upstream          | 1 | 18.000 | 1 | 1_Testes_ARID4B: |
| 1_Testes_ARID4B:                        | 428 in gene             | 1 | 18.000 | 1 | 1_Testes_ARID4B: |
| 1_Testes_ARID4B:                        | 43 in gene              | 1 | 43.000 | 1 | 1_Testes_ARID4B: |
| 1_Testes_ARID4B:                        | -327 upstream           | 1 | 20.000 | 1 | 1_Testes_ARID4B: |
| 1_Testes_ARID4B: 118, 65174             | in gene, downstream     | 1 | 22.000 | 2 | 1_Testes_ARID4B: |
| 1_Testes_ARID4B:                        | 145 in gene             | 1 | 24.000 | 1 | 1_Testes_ARID4B: |
| 1_Testes_ARID4B:                        | -2487 upstream          | 1 | 42.000 | 1 | 1_Testes_ARID4B: |
| 1_Testes_ARID4B:                        | 199 in gene             | 1 | 42.000 | 1 | 1_Testes_ARID4B: |
| 1_Testes_ARID4B:                        | 74 in gene              | 1 | 36.000 | 1 | 1_Testes_ARID4B: |
| 1_Testes_ARID4B:                        | -607 upstream           | 1 | 27.000 | 1 | 1_Testes_ARID4B: |
| 1_Testes_ARID4B:                        | 837 in gene             | 1 | 22.000 | 1 | 1_Testes_ARID4B: |
| 1_Testes_ARID4B:                        | 214 in gene             | 1 | 22.000 | 1 | 1_Testes_ARID4B: |
| 1_Testes_ARID4B:                        | 279 in gene             | 1 | 37.000 | 1 | 1_Testes_ARID4B: |
| 1_Testes_ARID4B:                        | -7907 upstream          | 1 | 37.000 | 1 | 1_Testes_ARID4B: |
| 1_Testes_ARID4B:                        | 752 in gene             | 1 | 34.000 | 1 | 1_Testes_ARID4B: |



|                                         |                        |   |        |   |                  |
|-----------------------------------------|------------------------|---|--------|---|------------------|
| 1_Testes_ARID4B:                        | 117 in gene            | 1 | 21.000 | 1 | 1_Testes_ARID4B: |
| 1_Testes_ARID4B:                        | 21730 downstream       | 1 | 21.000 | 1 | 1_Testes_ARID4B: |
| 1_Testes_ARID4B:                        | 704 in gene            | 1 | 42.000 | 1 | 1_Testes_ARID4B: |
| 1_Testes_ARID4B:                        | -1940 upstream         | 1 | 31.000 | 1 | 1_Testes_ARID4B: |
| 1_Testes_ARID4B:                        | 286 in gene            | 1 | 31.000 | 1 | 1_Testes_ARID4B: |
| 1_Testes_ARID4B:                        | 836 in gene            | 1 | 18.000 | 1 | 1_Testes_ARID4B: |
| 1_Testes_ARID4B:                        | -8745 upstream         | 1 | 16.000 | 1 | 1_Testes_ARID4B: |
| 1_Testes_ARID4B:85915, -261             | in gene, upstream      | 1 | 23.500 | 2 | 1_Testes_ARID4B: |
| 1_Testes_ARID4B:                        | 161 in gene            | 1 | 25.000 | 1 | 1_Testes_ARID4B: |
| 1_Testes_ARID4B:                        | 29585 downstream       | 1 | 25.000 | 1 | 1_Testes_ARID4B: |
| 1_Testes_ARID4B:                        | 30605 in gene          | 1 | 21.000 | 1 | 1_Testes_ARID4B: |
| 1_Testes_ARID4B:                        | 200 in gene            | 1 | 20.000 | 1 | 1_Testes_ARID4B: |
| 1_Testes_ARID4B:                        | 329 in gene            | 1 | 23.000 | 1 | 1_Testes_ARID4B: |
| 1_Testes_ARID4B:                        | 226 in gene            | 1 | 26.000 | 1 | 1_Testes_ARID4B: |
| 1_Testes_ARID4B:                        | 162 in gene            | 1 | 31.000 | 1 | 1_Testes_ARID4B: |
| 1_Testes_ARID4B:33381, 245              | downstream, in gene    | 1 | 24.000 | 2 | 1_Testes_ARID4B: |
| 1_Testes_ARID4B:                        | 359 in gene            | 1 | 25.000 | 1 | 1_Testes_ARID4B: |
| 1_Testes_ARID4B:                        | 6949 in gene           | 1 | 27.000 | 1 | 1_Testes_ARID4B: |
| 1_Testes_ARID4B:                        | 7026 downstream        | 1 | 27.000 | 1 | 1_Testes_ARID4B: |
| 1_Testes_ARID4B:                        | -7142 upstream         | 1 | 27.000 | 1 | 1_Testes_ARID4B: |
| 1_Testes_ARID4B:                        | 153 in gene            | 1 | 24.000 | 1 | 1_Testes_ARID4B: |
| 1_Testes_ARID4B:                        | 3681 downstream        | 1 | 27.000 | 1 | 1_Testes_ARID4B: |
| 1_Testes_ARID4B:362, -8038              | in gene, upstream      | 1 | 22.500 | 2 | 1_Testes_ARID4B: |
| 1_Testes_ARID4B:-629, 7771, 10907       | upstream, downstream   | 1 | 22.333 | 3 | 1_Testes_ARID4B: |
| 1_Testes_ARID4B:-7360, 1040, 4176, 134  | upstream, in gene, dow | 1 | 25.250 | 4 | 1_Testes_ARID4B: |
| 1_Testes_ARID4B:11669, 3269, 133, -914  | downstream, downstre   | 1 | 25.250 | 4 | 1_Testes_ARID4B: |
| 1_Testes_ARID4B:-10662, -2262, 874, 101 | upstream, upstream, in | 1 | 23.400 | 5 | 1_Testes_ARID4B: |
| 1_Testes_ARID4B:-9542, -262, 1743, 1095 | upstream, upstream, in | 1 | 24.500 | 4 | 1_Testes_ARID4B: |
| 1_Testes_ARID4B:10711, 8706, -505       | downstream, downstre   | 1 | 25.333 | 3 | 1_Testes_ARID4B: |
| 1_Testes_ARID4B:-9086, 125, 14733       | upstream, in gene, dow | 1 | 31.667 | 3 | 1_Testes_ARID4B: |
| 1_Testes_ARID4B:10640, -3968            | downstream, upstream   | 1 | 39.500 | 2 | 1_Testes_ARID4B: |
| 1_Testes_ARID4B:                        | 185 in gene            | 1 | 53.000 | 1 | 1_Testes_ARID4B: |
| 1_Testes_ARID4B:                        | -426 upstream          | 1 | 53.000 | 1 | 1_Testes_ARID4B: |
| 1_Testes_ARID4B:                        | 333 in gene            | 1 | 27.000 | 1 | 1_Testes_ARID4B: |
| 1_Testes_ARID4B:-56, -3000, -6344       | upstream, upstream, u  | 1 | 30.667 | 3 | 1_Testes_ARID4B: |
| 1_Testes_ARID4B:356, -2588, -5932       | downstream, upstream   | 1 | 30.667 | 3 | 1_Testes_ARID4B: |
| 1_Testes_ARID4B:3319, 375, -2969        | downstream, in gene, u | 1 | 30.667 | 3 | 1_Testes_ARID4B: |
| 1_Testes_ARID4B:6954, 4010, 666         | downstream, downstre   | 1 | 30.667 | 3 | 1_Testes_ARID4B: |
| 1_Testes_ARID4B:-7076, -4132, -788      | upstream, upstream, u  | 1 | 30.667 | 3 | 1_Testes_ARID4B: |
| 1_Testes_ARID4B:                        | -8413 upstream         | 1 | 29.000 | 1 | 1_Testes_ARID4B: |
| 1_Testes_ARID4B:                        | 18823 downstream       | 1 | 66.000 | 1 | 1_Testes_ARID4B: |
| 1_Testes_ARID4B:                        | 3855 in gene           | 1 | 66.000 | 1 | 1_Testes_ARID4B: |
| 1_Testes_ARID4B:                        | 23129 in gene          | 1 | 34.000 | 1 | 1_Testes_ARID4B: |
| 1_Testes_ARID4B:                        | -2382 upstream         | 1 | 34.000 | 1 | 1_Testes_ARID4B: |
| 1_Testes_ARID4B:                        | -5047 upstream         | 1 | 34.000 | 1 | 1_Testes_ARID4B: |
| 1_Testes_ARID4B:                        | -10438 upstream        | 1 | 34.000 | 1 | 1_Testes_ARID4B: |
| 1_Testes_ARID4B:                        | -450 upstream          | 1 | 20.000 | 1 | 1_Testes_ARID4B: |

|                                      |                          |   |        |   |                  |
|--------------------------------------|--------------------------|---|--------|---|------------------|
| 1_Testes_ARID4B:                     | -2139 upstream           | 1 | 20.000 | 1 | 1_Testes_ARID4B: |
| 1_Testes_ARID4B:                     | 1593 in gene             | 1 | 27.000 | 1 | 1_Testes_ARID4B: |
| 1_Testes_ARID4B:                     | 391 in gene              | 1 | 32.000 | 1 | 1_Testes_ARID4B: |
| 1_Testes_ARID4B:                     | -507 upstream            | 1 | 32.000 | 1 | 1_Testes_ARID4B: |
| 1_Testes_ARID4B: 13692, -388         | downstream, upstream     | 1 | 27.000 | 2 | 1_Testes_ARID4B: |
| 1_Testes_ARID4B:                     | 201 in gene              | 1 | 22.000 | 1 | 1_Testes_ARID4B: |
| 1_Testes_ARID4B:                     | 11922 downstream         | 1 | 22.000 | 1 | 1_Testes_ARID4B: |
| 1_Testes_ARID4B: 3697, 4937          | downstream, downstre     | 1 | 23.000 | 2 | 1_Testes_ARID4B: |
| 1_Testes_ARID4B: -243, 997           | upstream, in gene        | 1 | 23.000 | 2 | 1_Testes_ARID4B: |
| 1_Testes_ARID4B:                     | 215 in gene              | 1 | 21.000 | 1 | 1_Testes_ARID4B: |
| 1_Testes_ARID4B:                     | -1248 upstream           | 1 | 21.000 | 1 | 1_Testes_ARID4B: |
| 1_Testes_ARID4B:                     | 6982 downstream          | 1 | 21.000 | 1 | 1_Testes_ARID4B: |
| 1_Testes_ARID4B:                     | -9892 upstream           | 1 | 38.000 | 1 | 1_Testes_ARID4B: |
| 1_Testes_ARID4B:                     | 9345 downstream          | 1 | 38.000 | 1 | 1_Testes_ARID4B: |
| 1_Testes_ARID4B:                     | -260 upstream            | 1 | 38.000 | 1 | 1_Testes_ARID4B: |
| 1_Testes_ARID4B:                     | 194 in gene              | 1 | 38.000 | 1 | 1_Testes_ARID4B: |
| 1_Testes_ARID4B:                     | 181 in gene              | 1 | 48.000 | 1 | 1_Testes_ARID4B: |
| 1_Testes_ARID4B:                     | 13492 downstream         | 1 | 26.000 | 1 | 1_Testes_ARID4B: |
| 1_Testes_ARID4B:                     | -6392 upstream           | 1 | 26.000 | 1 | 1_Testes_ARID4B: |
| 1_Testes_ARID4B: -345, -4857         | upstream, upstream       | 1 | 23.500 | 2 | 1_Testes_ARID4B: |
| 1_Testes_ARID4B: 296, 4808           | in gene, downstream      | 1 | 23.500 | 2 | 1_Testes_ARID4B: |
| 1_Testes_ARID4B: -4610, -98, 9214    | upstream, upstream, d    | 1 | 28.667 | 3 | 1_Testes_ARID4B: |
| 1_Testes_ARID4B: 9960, 5448, -3864   | downstream, downstre     | 1 | 28.667 | 3 | 1_Testes_ARID4B: |
| 1_Testes_ARID4B: -8874, 438, 21190   | upstream, in gene, dow   | 1 | 26.333 | 3 | 1_Testes_ARID4B: |
| 1_Testes_ARID4B: 8509, 3805, 77      | in gene, in gene, in gen | 1 | 20.667 | 3 | 1_Testes_ARID4B: |
| 1_Testes_ARID4B: 14929, 11201        | downstream, downstre     | 1 | 21.500 | 2 | 1_Testes_ARID4B: |
| 1_Testes_ARID4B:                     | -7304 upstream           | 1 | 26.000 | 1 | 1_Testes_ARID4B: |
| 1_Testes_ARID4B:                     | 1237 in gene             | 1 | 26.000 | 1 | 1_Testes_ARID4B: |
| 1_Testes_ARID4B:                     | 6252 downstream          | 1 | 26.000 | 1 | 1_Testes_ARID4B: |
| 1_Testes_ARID4B:                     | 9607 downstream          | 1 | 26.000 | 1 | 1_Testes_ARID4B: |
| 1_Testes_ARID4B: 711, -6041          | in gene, upstream        | 1 | 42.500 | 2 | 1_Testes_ARID4B: |
| 1_Testes_ARID4B: -1492, 5260         | upstream, downstream     | 1 | 42.500 | 2 | 1_Testes_ARID4B: |
| 1_Testes_ARID4B: -6642, 110, 21454   | upstream, in gene, dow   | 1 | 34.333 | 3 | 1_Testes_ARID4B: |
| 1_Testes_ARID4B:                     | 106 in gene              | 1 | 18.000 | 1 | 1_Testes_ARID4B: |
| 1_Testes_ARID4B:                     | 867 in gene              | 1 | 20.000 | 1 | 1_Testes_ARID4B: |
| 1_Testes_ARID4B:                     | -280 upstream            | 1 | 22.000 | 1 | 1_Testes_ARID4B: |
| 1_Testes_ARID4B:                     | 5810 in gene             | 1 | 22.000 | 1 | 1_Testes_ARID4B: |
| 1_Testes_ARID4B:                     | 3275 in gene             | 1 | 24.000 | 1 | 1_Testes_ARID4B: |
| 1_Testes_ARID4B: 12099, 13667        | downstream, downstre     | 1 | 32.000 | 2 | 1_Testes_ARID4B: |
| 1_Testes_ARID4B: 2845, 1277          | in gene, in gene         | 1 | 32.000 | 2 | 1_Testes_ARID4B: |
| 1_Testes_ARID4B: -6042, -4474, 25190 | upstream, upstream, d    | 1 | 29.667 | 3 | 1_Testes_ARID4B: |
| 1_Testes_ARID4B:                     | 198 in gene              | 1 | 25.000 | 1 | 1_Testes_ARID4B: |
| 1_Testes_ARID4B:                     | 5370 downstream          | 1 | 25.000 | 1 | 1_Testes_ARID4B: |
| 1_Testes_ARID4B: 1093, 14405         | in gene, downstream      | 1 | 32.000 | 2 | 1_Testes_ARID4B: |
| 1_Testes_ARID4B: 222, 17118          | in gene, downstream      | 1 | 34.000 | 2 | 1_Testes_ARID4B: |
| 1_Testes_ARID4B:                     | 482 in gene              | 1 | 29.000 | 1 | 1_Testes_ARID4B: |
| 1_Testes_ARID4B:                     | 13172 downstream         | 1 | 29.000 | 1 | 1_Testes_ARID4B: |

|                                      |                      |   |        |   |                  |
|--------------------------------------|----------------------|---|--------|---|------------------|
| 1_Testes_ARID4B: 150, -9482          | in gene, upstream    | 1 | 41.500 | 2 | 1_Testes_ARID4B: |
| 1_Testes_ARID4B:                     | -8786 upstream       | 1 | 40.000 | 1 | 1_Testes_ARID4B: |
| 1_Testes_ARID4B: 10225, 593          | downstream, in gene  | 1 | 41.500 | 2 | 1_Testes_ARID4B: |
| 1_Testes_ARID4B: -10355, -723        | upstream, upstream   | 1 | 41.500 | 2 | 1_Testes_ARID4B: |
| 1_Testes_ARID4B:                     | 356 in gene          | 1 | 37.000 | 1 | 1_Testes_ARID4B: |
| 1_Testes_ARID4B:                     | 210 in gene          | 1 | 15.000 | 1 | 1_Testes_ARID4B: |
| 1_Testes_ARID4B:                     | -120 upstream        | 1 | 33.000 | 1 | 1_Testes_ARID4B: |
| 1_Testes_ARID4B:                     | 149 in gene          | 1 | 30.000 | 1 | 1_Testes_ARID4B: |
| 1_Testes_ARID4B:                     | 315 in gene          | 1 | 19.000 | 1 | 1_Testes_ARID4B: |
| 1_Testes_ARID4B:                     | 71 in gene           | 1 | 24.000 | 1 | 1_Testes_ARID4B: |
| 1_Testes_ARID4B:                     | -481 upstream        | 1 | 24.000 | 1 | 1_Testes_ARID4B: |
| 1_Testes_ARID4B: 78797, 37773        | in gene, in gene     | 1 | 24.500 | 2 | 1_Testes_ARID4B: |
| 1_Testes_ARID4B:                     | -147 upstream        | 1 | 24.000 | 1 | 1_Testes_ARID4B: |
| 1_Testes_ARID4B:                     | 555 in gene          | 1 | 25.000 | 1 | 1_Testes_ARID4B: |
| 1_Testes_ARID4B:                     | 21446 downstream     | 1 | 23.000 | 1 | 1_Testes_ARID4B: |
| 1_Testes_ARID4B:                     | 4797 in gene         | 1 | 23.000 | 1 | 1_Testes_ARID4B: |
| 1_Testes_ARID4B: -10836, 8508, 17148 | upstream, downstream | 1 | 31.000 | 3 | 1_Testes_ARID4B: |
| 1_Testes_ARID4B: 72, 8712            | in gene, downstream  | 1 | 35.000 | 2 | 1_Testes_ARID4B: |
| 1_Testes_ARID4B: 9037, 397           | downstream, in gene  | 1 | 35.000 | 2 | 1_Testes_ARID4B: |
| 1_Testes_ARID4B:                     | 4147 in gene         | 1 | 29.000 | 1 | 1_Testes_ARID4B: |
| 1_Testes_ARID4B:                     | 6646 downstream      | 1 | 29.000 | 1 | 1_Testes_ARID4B: |
| 1_Testes_ARID4B:                     | 394 in gene          | 1 | 29.000 | 1 | 1_Testes_ARID4B: |
| 1_Testes_ARID4B:                     | -178 upstream        | 1 | 29.000 | 1 | 1_Testes_ARID4B: |
| 1_Testes_ARID4B:                     | -548 upstream        | 1 | 29.000 | 1 | 1_Testes_ARID4B: |
| 1_Testes_ARID4B:                     | 1209 in gene         | 1 | 28.000 | 1 | 1_Testes_ARID4B: |
| 1_Testes_ARID4B:                     | -575 upstream        | 1 | 23.000 | 1 | 1_Testes_ARID4B: |
| 1_Testes_ARID4B: 345, 45465          | in gene, downstream  | 1 | 27.000 | 2 | 1_Testes_ARID4B: |
| 1_Testes_ARID4B: -275, -6259         | upstream, upstream   | 1 | 30.500 | 2 | 1_Testes_ARID4B: |
| 1_Testes_ARID4B: 240, 6224           | in gene, downstream  | 1 | 30.500 | 2 | 1_Testes_ARID4B: |
| 1_Testes_ARID4B: -5845, 139          | upstream, in gene    | 1 | 30.500 | 2 | 1_Testes_ARID4B: |
| 1_Testes_ARID4B: 34706, 28722        | downstream, downstre | 1 | 30.500 | 2 | 1_Testes_ARID4B: |
| 1_Testes_ARID4B:                     | 771 in gene          | 1 | 19.000 | 1 | 1_Testes_ARID4B: |
| 1_Testes_ARID4B:                     | 29831 downstream     | 1 | 19.000 | 1 | 1_Testes_ARID4B: |
| 1_Testes_ARID4B: -6956, -8940        | upstream, upstream   | 1 | 28.500 | 2 | 1_Testes_ARID4B: |
| 1_Testes_ARID4B: 2818, 834           | in gene, in gene     | 1 | 28.500 | 2 | 1_Testes_ARID4B: |
| 1_Testes_ARID4B: 74176, 320          | downstream, in gene  | 1 | 35.000 | 2 | 1_Testes_ARID4B: |
| 1_Testes_ARID4B: 15960, -1192, -5480 | downstream, upstream | 1 | 31.667 | 3 | 1_Testes_ARID4B: |
| 1_Testes_ARID4B: 88, 4376            | in gene, downstream  | 1 | 31.500 | 2 | 1_Testes_ARID4B: |
| 1_Testes_ARID4B: -4002, 286          | upstream, in gene    | 1 | 31.500 | 2 | 1_Testes_ARID4B: |
| 1_Testes_ARID4B:                     | -6902 upstream       | 1 | 29.000 | 1 | 1_Testes_ARID4B: |
| 1_Testes_ARID4B:                     | 441 in gene          | 1 | 29.000 | 1 | 1_Testes_ARID4B: |
| 1_Testes_ARID4B:                     | -9312 upstream       | 1 | 32.000 | 1 | 1_Testes_ARID4B: |
| 1_Testes_ARID4B:                     | 389 in gene          | 1 | 32.000 | 1 | 1_Testes_ARID4B: |
| 1_Testes_ARID4B:                     | 9632 downstream      | 1 | 32.000 | 1 | 1_Testes_ARID4B: |
| 1_Testes_ARID4B: 383, -641           | in gene, upstream    | 1 | 24.500 | 2 | 1_Testes_ARID4B: |
| 1_Testes_ARID4B: -605, 419           | upstream, in gene    | 1 | 24.500 | 2 | 1_Testes_ARID4B: |
| 1_Testes_ARID4B:                     | 516 in gene          | 1 | 23.000 | 1 | 1_Testes_ARID4B: |

|                                         |                          |   |        |   |                  |
|-----------------------------------------|--------------------------|---|--------|---|------------------|
| 1_Testes_ARID4B:                        | 722 in gene              | 1 | 17.000 | 1 | 1_Testes_ARID4B: |
| 1_Testes_ARID4B:                        | 88613 in gene            | 1 | 38.000 | 1 | 1_Testes_ARID4B: |
| 1_Testes_ARID4B: 17828, -28             | downstream, upstream     | 1 | 32.000 | 2 | 1_Testes_ARID4B: |
| 1_Testes_ARID4B:                        | -76 upstream             | 1 | 26.000 | 1 | 1_Testes_ARID4B: |
| 1_Testes_ARID4B: 41726, 58206           | in gene, downstream      | 1 | 22.000 | 2 | 1_Testes_ARID4B: |
| 1_Testes_ARID4B:                        | -510 upstream            | 1 | 22.000 | 1 | 1_Testes_ARID4B: |
| 1_Testes_ARID4B:                        | 1286 in gene             | 1 | 22.000 | 1 | 1_Testes_ARID4B: |
| 1_Testes_ARID4B:                        | 6762 in gene             | 1 | 22.000 | 1 | 1_Testes_ARID4B: |
| 1_Testes_ARID4B:                        | -6311 upstream           | 1 | 22.000 | 1 | 1_Testes_ARID4B: |
| 1_Testes_ARID4B: 10278, 11862           | downstream, downstre     | 1 | 22.000 | 2 | 1_Testes_ARID4B: |
| 1_Testes_ARID4B: 83, 1667               | in gene, in gene         | 1 | 22.000 | 2 | 1_Testes_ARID4B: |
| 1_Testes_ARID4B:                        | 1603 in gene             | 1 | 36.000 | 1 | 1_Testes_ARID4B: |
| 1_Testes_ARID4B: 45720, 376             | in gene, in gene         | 1 | 25.000 | 2 | 1_Testes_ARID4B: |
| 1_Testes_ARID4B:                        | 668 in gene              | 1 | 30.000 | 1 | 1_Testes_ARID4B: |
| 1_Testes_ARID4B:                        | -928 upstream            | 1 | 30.000 | 1 | 1_Testes_ARID4B: |
| 1_Testes_ARID4B:                        | 23576 downstream         | 1 | 30.000 | 1 | 1_Testes_ARID4B: |
| 1_Testes_ARID4B:                        | 289 in gene              | 1 | 18.000 | 1 | 1_Testes_ARID4B: |
| 1_Testes_ARID4B:                        | -1 upstream              | 1 | 22.000 | 1 | 1_Testes_ARID4B: |
| 1_Testes_ARID4B: -731, 341              | upstream, in gene        | 1 | 23.000 | 2 | 1_Testes_ARID4B: |
| 1_Testes_ARID4B:                        | 277 in gene              | 1 | 25.000 | 1 | 1_Testes_ARID4B: |
| 1_Testes_ARID4B:                        | 158 in gene              | 1 | 29.000 | 1 | 1_Testes_ARID4B: |
| 1_Testes_ARID4B:                        | 1157 in gene             | 1 | 24.000 | 1 | 1_Testes_ARID4B: |
| 1_Testes_ARID4B:                        | -3744 upstream           | 1 | 26.000 | 1 | 1_Testes_ARID4B: |
| 1_Testes_ARID4B:                        | 111 in gene              | 1 | 26.000 | 1 | 1_Testes_ARID4B: |
| 1_Testes_ARID4B: 27325, 253, -4014      | downstream, in gene, u   | 1 | 27.333 | 3 | 1_Testes_ARID4B: |
| 1_Testes_ARID4B: -4032, 235             | upstream, in gene        | 1 | 28.000 | 2 | 1_Testes_ARID4B: |
| 1_Testes_ARID4B:                        | -4691 upstream           | 1 | 19.000 | 1 | 1_Testes_ARID4B: |
| 1_Testes_ARID4B:                        | 23 in gene               | 1 | 19.000 | 1 | 1_Testes_ARID4B: |
| 1_Testes_ARID4B:                        | -7284 upstream           | 1 | 21.000 | 1 | 1_Testes_ARID4B: |
| 1_Testes_ARID4B:                        | -2886 upstream           | 1 | 21.000 | 1 | 1_Testes_ARID4B: |
| 1_Testes_ARID4B:                        | 15511 in gene            | 1 | 21.000 | 1 | 1_Testes_ARID4B: |
| 1_Testes_ARID4B:                        | 775 in gene              | 1 | 22.000 | 1 | 1_Testes_ARID4B: |
| 1_Testes_ARID4B:                        | -3650 upstream           | 1 | 35.000 | 1 | 1_Testes_ARID4B: |
| 1_Testes_ARID4B:                        | 599 in gene              | 1 | 35.000 | 1 | 1_Testes_ARID4B: |
| 1_Testes_ARID4B: 50944, 48021, 14496, 2 | in gene, in gene, in gen | 1 | 21.500 | 4 | 1_Testes_ARID4B: |
| 1_Testes_ARID4B:                        | 1815 downstream          | 1 | 17.000 | 1 | 1_Testes_ARID4B: |
| 1_Testes_ARID4B:                        | -761 upstream            | 1 | 39.000 | 1 | 1_Testes_ARID4B: |
| 1_Testes_ARID4B: 362, 28538             | in gene, downstream      | 1 | 47.500 | 2 | 1_Testes_ARID4B: |
| 1_Testes_ARID4B:                        | -3749 upstream           | 1 | 56.000 | 1 | 1_Testes_ARID4B: |
| 1_Testes_ARID4B:                        | 125 in gene              | 1 | 56.000 | 1 | 1_Testes_ARID4B: |
| 1_Testes_ARID4B: 13383, 231             | downstream, in gene      | 1 | 47.000 | 2 | 1_Testes_ARID4B: |
| 1_Testes_ARID4B:                        | -1471 upstream           | 1 | 38.000 | 1 | 1_Testes_ARID4B: |
| 1_Testes_ARID4B:                        | 44300 downstream         | 1 | 20.000 | 1 | 1_Testes_ARID4B: |
| 1_Testes_ARID4B:                        | 174 in gene              | 1 | 20.000 | 1 | 1_Testes_ARID4B: |
| 1_Testes_ARID4B:                        | -237 upstream            | 1 | 20.000 | 1 | 1_Testes_ARID4B: |
| 1_Testes_ARID4B: 6010, 378              | in gene, in gene         | 1 | 22.000 | 2 | 1_Testes_ARID4B: |
| 1_Testes_ARID4B:                        | -7599 upstream           | 1 | 26.000 | 1 | 1_Testes_ARID4B: |

|                                     |                        |   |        |   |                  |
|-------------------------------------|------------------------|---|--------|---|------------------|
| 1_Testes_ARID4B:                    | -276 upstream          | 1 | 19.000 | 1 | 1_Testes_ARID4B: |
| 1_Testes_ARID4B: 1173, -667         | in gene, upstream      | 1 | 22.500 | 2 | 1_Testes_ARID4B: |
| 1_Testes_ARID4B:                    | 692 in gene            | 1 | 22.000 | 1 | 1_Testes_ARID4B: |
| 1_Testes_ARID4B:                    | 2989 in gene           | 1 | 33.000 | 1 | 1_Testes_ARID4B: |
| 1_Testes_ARID4B:                    | 427 in gene            | 1 | 28.000 | 1 | 1_Testes_ARID4B: |
| 1_Testes_ARID4B:                    | -17 upstream           | 1 | 34.000 | 1 | 1_Testes_ARID4B: |
| 1_Testes_ARID4B: 899, -61           | in gene, upstream      | 1 | 30.000 | 2 | 1_Testes_ARID4B: |
| 1_Testes_ARID4B: 192, -9984         | in gene, upstream      | 1 | 24.000 | 2 | 1_Testes_ARID4B: |
| 1_Testes_ARID4B: -619, 549          | upstream, in gene      | 1 | 22.000 | 2 | 1_Testes_ARID4B: |
| 1_Testes_ARID4B:                    | 1307 in gene           | 1 | 25.000 | 1 | 1_Testes_ARID4B: |
| 1_Testes_ARID4B:                    | 243 in gene            | 1 | 19.000 | 1 | 1_Testes_ARID4B: |
| 1_Testes_ARID4B:                    | -245 upstream          | 1 | 27.000 | 1 | 1_Testes_ARID4B: |
| 1_Testes_ARID4B:                    | 652 in gene            | 1 | 27.000 | 1 | 1_Testes_ARID4B: |
| 1_Testes_ARID4B: 24200, 243, -10189 | downstream, in gene, u | 1 | 26.667 | 3 | 1_Testes_ARID4B: |
| 1_Testes_ARID4B: -10298, 134        | upstream, in gene      | 1 | 26.500 | 2 | 1_Testes_ARID4B: |
| 1_Testes_ARID4B:                    | 982 in gene            | 1 | 35.000 | 1 | 1_Testes_ARID4B: |
| 1_Testes_ARID4B:                    | 342 in gene            | 1 | 21.000 | 1 | 1_Testes_ARID4B: |
| 1_Testes_ARID4B:                    | 379 in gene            | 1 | 24.000 | 1 | 1_Testes_ARID4B: |
| 1_Testes_ARID4B:                    | 207 in gene            | 1 | 34.000 | 1 | 1_Testes_ARID4B: |
| 1_Testes_ARID4B:                    | 80 in gene             | 1 | 17.000 | 1 | 1_Testes_ARID4B: |
| 1_Testes_ARID4B:                    | 310 in gene            | 1 | 23.000 | 1 | 1_Testes_ARID4B: |
| 1_Testes_ARID4B:                    | 1281 in gene           | 1 | 25.000 | 1 | 1_Testes_ARID4B: |
| 1_Testes_ARID4B: 2876, 476          | in gene, in gene       | 1 | 24.000 | 2 | 1_Testes_ARID4B: |
| 1_Testes_ARID4B: 9944, 7544         | downstream, downstre   | 1 | 24.000 | 2 | 1_Testes_ARID4B: |
| 1_Testes_ARID4B:                    | 180 in gene            | 1 | 30.000 | 1 | 1_Testes_ARID4B: |
| 1_Testes_ARID4B: 12197, 325         | downstream, in gene    | 1 | 29.500 | 2 | 1_Testes_ARID4B: |
| 1_Testes_ARID4B:                    | -433 upstream          | 1 | 29.000 | 1 | 1_Testes_ARID4B: |
| 1_Testes_ARID4B:                    | 41 in gene             | 1 | 23.000 | 1 | 1_Testes_ARID4B: |
| 1_Testes_ARID4B:                    | 99 in gene             | 1 | 16.000 | 1 | 1_Testes_ARID4B: |
| 1_Testes_ARID4B:                    | 46601 downstream       | 1 | 16.000 | 1 | 1_Testes_ARID4B: |
| 1_Testes_ARID4B:                    | 153 in gene            | 1 | 44.000 | 1 | 1_Testes_ARID4B: |
| 1_Testes_ARID4B:                    | 734803 in gene         | 1 | 18.000 | 1 | 1_Testes_ARID4B: |
| 1_Testes_ARID4B:                    | 752 in gene            | 1 | 29.000 | 1 | 1_Testes_ARID4B: |
| 1_Testes_ARID4B:                    | 879 in gene            | 1 | 26.000 | 1 | 1_Testes_ARID4B: |
| 1_Testes_ARID4B:                    | 175 in gene            | 1 | 28.000 | 1 | 1_Testes_ARID4B: |
| 1_Testes_ARID4B:                    | -513 upstream          | 1 | 22.000 | 1 | 1_Testes_ARID4B: |
| 1_Testes_ARID4B: 28568, 7608        | downstream, in gene    | 1 | 23.000 | 2 | 1_Testes_ARID4B: |
| 1_Testes_ARID4B:                    | 373 in gene            | 1 | 25.000 | 1 | 1_Testes_ARID4B: |
| 1_Testes_ARID4B:                    | 203 in gene            | 1 | 26.000 | 1 | 1_Testes_ARID4B: |
| 1_Testes_ARID4B:                    | 633 in gene            | 1 | 34.000 | 1 | 1_Testes_ARID4B: |
| 1_Testes_ARID4B:                    | 327 in gene            | 1 | 25.000 | 1 | 1_Testes_ARID4B: |
| 1_Testes_ARID4B:                    | 1096 in gene           | 1 | 35.000 | 1 | 1_Testes_ARID4B: |
| 1_Testes_ARID4B:                    | 208 in gene            | 1 | 30.000 | 1 | 1_Testes_ARID4B: |
| 1_Testes_ARID4B:                    | -589 upstream          | 1 | 32.000 | 1 | 1_Testes_ARID4B: |
| 1_Testes_ARID4B:                    | 36735 downstream       | 1 | 25.000 | 1 | 1_Testes_ARID4B: |
| 1_Testes_ARID4B:                    | 428 in gene            | 1 | 25.000 | 1 | 1_Testes_ARID4B: |
| 1_Testes_ARID4B:                    | 1137 in gene           | 1 | 34.000 | 1 | 1_Testes_ARID4B: |

|                                 |                      |          |                    |
|---------------------------------|----------------------|----------|--------------------|
| 1_Testes_ARID4B: 731, 155       | in gene, in gene     | 1 23.500 | 2 1_Testes_ARID4B: |
| 1_Testes_ARID4B:                | 606 in gene          | 1 44.000 | 1 1_Testes_ARID4B: |
| 1_Testes_ARID4B:                | 201 in gene          | 1 43.000 | 1 1_Testes_ARID4B: |
| 1_Testes_ARID4B:                | -8810 upstream       | 1 43.000 | 1 1_Testes_ARID4B: |
| 1_Testes_ARID4B:                | 65745 in gene        | 1 21.000 | 1 1_Testes_ARID4B: |
| 1_Testes_ARID4B:                | 390 in gene          | 1 21.000 | 1 1_Testes_ARID4B: |
| 1_Testes_ARID4B: 645, 101       | in gene, in gene     | 1 23.500 | 2 1_Testes_ARID4B: |
| 1_Testes_ARID4B:                | 349 in gene          | 1 30.000 | 1 1_Testes_ARID4B: |
| 1_Testes_ARID4B:                | 93 in gene           | 1 25.000 | 1 1_Testes_ARID4B: |
| 1_Testes_ARID4B:                | 749 in gene          | 1 31.000 | 1 1_Testes_ARID4B: |
| 1_Testes_ARID4B:                | 919 in gene          | 1 24.000 | 1 1_Testes_ARID4B: |
| 1_Testes_ARID4B: 1291, -565     | in gene, upstream    | 1 50.500 | 2 1_Testes_ARID4B: |
| 1_Testes_ARID4B: 279552, 277696 | downstream, downstre | 1 50.500 | 2 1_Testes_ARID4B: |
| 1_Testes_ARID4B:                | 386 in gene          | 1 30.000 | 1 1_Testes_ARID4B: |
| 1_Testes_ARID4B:                | -542 upstream        | 1 27.000 | 1 1_Testes_ARID4B: |
| 1_Testes_ARID4B:                | 116 in gene          | 1 27.000 | 1 1_Testes_ARID4B: |
| 1_Testes_ARID4B: -3204, -5348   | upstream, upstream   | 1 20.500 | 2 1_Testes_ARID4B: |
| 1_Testes_ARID4B: 766, 2910      | in gene, in gene     | 1 20.500 | 2 1_Testes_ARID4B: |
| 1_Testes_ARID4B:                | 446 in gene          | 1 17.000 | 1 1_Testes_ARID4B: |
| 1_Testes_ARID4B:                | 247 in gene          | 1 23.000 | 1 1_Testes_ARID4B: |
| 1_Testes_ARID4B:                | 791 in gene          | 1 27.000 | 1 1_Testes_ARID4B: |
| 1_Testes_ARID4B:                | -553 upstream        | 1 27.000 | 1 1_Testes_ARID4B: |
| 1_Testes_ARID4B:                | 1176 in gene         | 1 19.000 | 1 1_Testes_ARID4B: |
| 1_Testes_ARID4B:                | 257 in gene          | 1 22.000 | 1 1_Testes_ARID4B: |
| 1_Testes_ARID4B:                | 347 in gene          | 1 24.000 | 1 1_Testes_ARID4B: |
| 1_Testes_ARID4B: 17214, -226    | downstream, upstream | 1 30.500 | 2 1_Testes_ARID4B: |
| 1_Testes_ARID4B:                | 154 in gene          | 1 37.000 | 1 1_Testes_ARID4B: |
| 1_Testes_ARID4B:                | 418 in gene          | 1 20.000 | 1 1_Testes_ARID4B: |
| 1_Testes_ARID4B: 51562, 394     | in gene, in gene     | 1 19.000 | 2 1_Testes_ARID4B: |
| 1_Testes_ARID4B:                | -277 upstream        | 1 39.000 | 1 1_Testes_ARID4B: |
| 1_Testes_ARID4B:                | 182 in gene          | 1 39.000 | 1 1_Testes_ARID4B: |
| 1_Testes_ARID4B: 645, -651      | in gene, upstream    | 1 24.000 | 2 1_Testes_ARID4B: |
| 1_Testes_ARID4B:                | 984 in gene          | 1 33.000 | 1 1_Testes_ARID4B: |
| 1_Testes_ARID4B:                | 4802 in gene         | 1 27.000 | 1 1_Testes_ARID4B: |
| 1_Testes_ARID4B:                | 117 in gene          | 1 25.000 | 1 1_Testes_ARID4B: |
| 1_Testes_ARID4B:                | 1056 in gene         | 1 25.000 | 1 1_Testes_ARID4B: |
| 1_Testes_ARID4B:                | -89 upstream         | 1 25.000 | 1 1_Testes_ARID4B: |
| 1_Testes_ARID4B:                | 139 in gene          | 1 28.000 | 1 1_Testes_ARID4B: |
| 1_Testes_ARID4B:                | 22133 downstream     | 1 16.000 | 1 1_Testes_ARID4B: |
| 1_Testes_ARID4B:                | 88 in gene           | 1 16.000 | 1 1_Testes_ARID4B: |
| 1_Testes_ARID4B:                | 367 in gene          | 1 27.000 | 1 1_Testes_ARID4B: |
| 1_Testes_ARID4B:                | 119 in gene          | 1 24.000 | 1 1_Testes_ARID4B: |
| 1_Testes_ARID4B: 949, -267      | in gene, upstream    | 1 21.000 | 2 1_Testes_ARID4B: |
| 1_Testes_ARID4B: -372, 844      | upstream, in gene    | 1 21.000 | 2 1_Testes_ARID4B: |
| 1_Testes_ARID4B:                | 482 in gene          | 1 25.000 | 1 1_Testes_ARID4B: |
| 1_Testes_ARID4B:                | 628 in gene          | 1 30.000 | 1 1_Testes_ARID4B: |
| 1_Testes_ARID4B: 25591, -281    | in gene, upstream    | 1 27.500 | 2 1_Testes_ARID4B: |

|                               |                    |   |        |   |                  |
|-------------------------------|--------------------|---|--------|---|------------------|
| 1_Testes_ARID4B:              | 150 downstream     | 1 | 31.000 | 1 | 1_Testes_ARID4B: |
| 1_Testes_ARID4B:              | 171 in gene        | 1 | 19.000 | 1 | 1_Testes_ARID4B: |
| 1_Testes_ARID4B: 38, 1201     | in gene, in gene   | 1 | 22.500 | 2 | 1_Testes_ARID4B: |
| 1_Testes_ARID4B:              | 856 in gene        | 1 | 27.000 | 1 | 1_Testes_ARID4B: |
| 1_Testes_ARID4B:              | 230 in gene        | 1 | 41.000 | 1 | 1_Testes_ARID4B: |
| 1_Testes_ARID4B:              | -164 upstream      | 1 | 24.000 | 1 | 1_Testes_ARID4B: |
| 1_Testes_ARID4B:              | 192 in gene        | 1 | 34.000 | 1 | 1_Testes_ARID4B: |
| 1_Testes_ARID4B:              | 357 in gene        | 1 | 23.000 | 1 | 1_Testes_ARID4B: |
| 1_Testes_ARID4B:              | 400 in gene        | 1 | 37.000 | 1 | 1_Testes_ARID4B: |
| 1_Testes_ARID4B:              | -7844 upstream     | 1 | 37.000 | 1 | 1_Testes_ARID4B: |
| 1_Testes_ARID4B:              | 184 in gene        | 1 | 24.000 | 1 | 1_Testes_ARID4B: |
| 1_Testes_ARID4B:              | -348 upstream      | 1 | 24.000 | 1 | 1_Testes_ARID4B: |
| 1_Testes_ARID4B:              | -3495 upstream     | 1 | 55.000 | 1 | 1_Testes_ARID4B: |
| 1_Testes_ARID4B:              | 2466 in gene       | 1 | 55.000 | 1 | 1_Testes_ARID4B: |
| 1_Testes_ARID4B:              | 24292 in gene      | 1 | 23.000 | 1 | 1_Testes_ARID4B: |
| 1_Testes_ARID4B:              | -751 upstream      | 1 | 32.000 | 1 | 1_Testes_ARID4B: |
| 1_Testes_ARID4B:              | 854 in gene        | 1 | 32.000 | 1 | 1_Testes_ARID4B: |
| 1_Testes_ARID4B:              | 310 downstream     | 1 | 32.000 | 1 | 1_Testes_ARID4B: |
| 1_Testes_ARID4B:              | 66 in gene         | 1 | 26.000 | 1 | 1_Testes_ARID4B: |
| 1_Testes_ARID4B:              | 435 in gene        | 1 | 25.000 | 1 | 1_Testes_ARID4B: |
| 1_Testes_ARID4B:              | 79409 in gene      | 1 | 23.000 | 1 | 1_Testes_ARID4B: |
| 1_Testes_ARID4B:              | 66 in gene         | 1 | 30.000 | 1 | 1_Testes_ARID4B: |
| 1_Testes_ARID4B:              | 339 in gene        | 1 | 33.000 | 1 | 1_Testes_ARID4B: |
| 1_Testes_ARID4B: 88758, 374   | in gene, in gene   | 1 | 21.500 | 2 | 1_Testes_ARID4B: |
| 1_Testes_ARID4B: 2073, 889    | in gene, in gene   | 1 | 16.500 | 2 | 1_Testes_ARID4B: |
| 1_Testes_ARID4B: -9431, -8247 | upstream, upstream | 1 | 16.500 | 2 | 1_Testes_ARID4B: |
| 1_Testes_ARID4B:              | 142 in gene        | 1 | 22.000 | 1 | 1_Testes_ARID4B: |
| 1_Testes_ARID4B:              | 803 in gene        | 1 | 35.000 | 1 | 1_Testes_ARID4B: |
| 1_Testes_ARID4B:              | 331 in gene        | 1 | 23.000 | 1 | 1_Testes_ARID4B: |
| 1_Testes_ARID4B:              | -433 upstream      | 1 | 17.000 | 1 | 1_Testes_ARID4B: |
| 1_Testes_ARID4B:              | 352 in gene        | 1 | 35.000 | 1 | 1_Testes_ARID4B: |
| 1_Testes_ARID4B:              | -69 upstream       | 1 | 20.000 | 1 | 1_Testes_ARID4B: |
| 1_Testes_ARID4B:              | 96 in gene         | 1 | 26.000 | 1 | 1_Testes_ARID4B: |
| 1_Testes_ARID4B:              | -3879 upstream     | 1 | 17.000 | 1 | 1_Testes_ARID4B: |
| 1_Testes_ARID4B:              | 220 in gene        | 1 | 31.000 | 1 | 1_Testes_ARID4B: |
| 1_Testes_ARID4B:              | 201 in gene        | 1 | 30.000 | 1 | 1_Testes_ARID4B: |
| 1_Testes_ARID4B:              | -345 upstream      | 1 | 30.000 | 1 | 1_Testes_ARID4B: |
| 1_Testes_ARID4B:              | 56117 downstream   | 1 | 21.000 | 1 | 1_Testes_ARID4B: |
| 1_Testes_ARID4B:              | 363 in gene        | 1 | 21.000 | 1 | 1_Testes_ARID4B: |
| 1_Testes_ARID4B:              | 110 in gene        | 1 | 34.000 | 1 | 1_Testes_ARID4B: |
| 1_Testes_ARID4B:              | 15129 downstream   | 1 | 25.000 | 1 | 1_Testes_ARID4B: |
| 1_Testes_ARID4B:              | 231 in gene        | 1 | 25.000 | 1 | 1_Testes_ARID4B: |
| 1_Testes_ARID4B:              | 234 in gene        | 1 | 36.000 | 1 | 1_Testes_ARID4B: |
| 1_Testes_ARID4B:              | 79 in gene         | 1 | 45.000 | 1 | 1_Testes_ARID4B: |
| 1_Testes_ARID4B:              | 908 in gene        | 1 | 34.000 | 1 | 1_Testes_ARID4B: |
| 1_Testes_ARID4B:              | 159 in gene        | 1 | 34.000 | 1 | 1_Testes_ARID4B: |
| 1_Testes_ARID4B:              | -73 upstream       | 1 | 34.000 | 1 | 1_Testes_ARID4B: |

|                                   |                          |   |        |   |                  |
|-----------------------------------|--------------------------|---|--------|---|------------------|
| 1_Testes_ARID4B:                  | 135 in gene              | 1 | 34.000 | 1 | 1_Testes_ARID4B: |
| 1_Testes_ARID4B:                  | -275 upstream            | 1 | 26.000 | 1 | 1_Testes_ARID4B: |
| 1_Testes_ARID4B:                  | 141 in gene              | 1 | 26.000 | 1 | 1_Testes_ARID4B: |
| 1_Testes_ARID4B:                  | -12 upstream             | 1 | 23.000 | 1 | 1_Testes_ARID4B: |
| 1_Testes_ARID4B: 212326, 6        | downstream, in gene      | 1 | 23.500 | 2 | 1_Testes_ARID4B: |
| 1_Testes_ARID4B:                  | 364 in gene              | 1 | 30.000 | 1 | 1_Testes_ARID4B: |
| 1_Testes_ARID4B: 424, 110376      | in gene, downstream      | 1 | 31.000 | 2 | 1_Testes_ARID4B: |
| 1_Testes_ARID4B:                  | 215 in gene              | 1 | 32.000 | 1 | 1_Testes_ARID4B: |
| 1_Testes_ARID4B:                  | 311 in gene              | 1 | 36.000 | 1 | 1_Testes_ARID4B: |
| 1_Testes_ARID4B:                  | 215 in gene              | 1 | 24.000 | 1 | 1_Testes_ARID4B: |
| 1_Testes_ARID4B:                  | 474 in gene              | 1 | 26.000 | 1 | 1_Testes_ARID4B: |
| 1_Testes_ARID4B:                  | -288 upstream            | 1 | 26.000 | 1 | 1_Testes_ARID4B: |
| 1_Testes_ARID4B:                  | 27400 downstream         | 1 | 26.000 | 1 | 1_Testes_ARID4B: |
| 1_Testes_ARID4B:                  | -8051 upstream           | 1 | 31.000 | 1 | 1_Testes_ARID4B: |
| 1_Testes_ARID4B:                  | 6141 downstream          | 1 | 31.000 | 1 | 1_Testes_ARID4B: |
| 1_Testes_ARID4B: 678, 18310       | in gene, downstream      | 1 | 25.000 | 2 | 1_Testes_ARID4B: |
| 1_Testes_ARID4B:                  | 208 in gene              | 1 | 19.000 | 1 | 1_Testes_ARID4B: |
| 1_Testes_ARID4B: 201, 1481        | in gene, in gene         | 1 | 28.500 | 2 | 1_Testes_ARID4B: |
| 1_Testes_ARID4B:                  | 195 in gene              | 1 | 32.000 | 1 | 1_Testes_ARID4B: |
| 1_Testes_ARID4B:                  | 22543 downstream         | 1 | 32.000 | 1 | 1_Testes_ARID4B: |
| 1_Testes_ARID4B:                  | 9342 downstream          | 1 | 36.000 | 1 | 1_Testes_ARID4B: |
| 1_Testes_ARID4B:                  | 8185 downstream          | 1 | 36.000 | 1 | 1_Testes_ARID4B: |
| 1_Testes_ARID4B:                  | 5722 downstream          | 1 | 36.000 | 1 | 1_Testes_ARID4B: |
| 1_Testes_ARID4B: 594, 36562       | in gene, downstream      | 1 | 35.500 | 2 | 1_Testes_ARID4B: |
| 1_Testes_ARID4B:                  | 53 in gene               | 1 | 35.000 | 1 | 1_Testes_ARID4B: |
| 1_Testes_ARID4B: 102, 2102, 29169 | in gene, in gene, in gen | 1 | 22.667 | 3 | 1_Testes_ARID4B: |
| 1_Testes_ARID4B: 128840, 8        | in gene, in gene         | 1 | 23.000 | 2 | 1_Testes_ARID4B: |
| 1_Testes_ARID4B: -74, 6390        | upstream, in gene        | 1 | 27.500 | 2 | 1_Testes_ARID4B: |
| 1_Testes_ARID4B:                  | 145031 in gene           | 1 | 24.000 | 1 | 1_Testes_ARID4B: |
| 1_Testes_ARID4B:                  | 137871 in gene           | 1 | 24.000 | 1 | 1_Testes_ARID4B: |
| 1_Testes_ARID4B:                  | 132641 in gene           | 1 | 24.000 | 1 | 1_Testes_ARID4B: |
| 1_Testes_ARID4B:                  | 126518 in gene           | 1 | 24.000 | 1 | 1_Testes_ARID4B: |
| 1_Testes_ARID4B:                  | 121576 in gene           | 1 | 24.000 | 1 | 1_Testes_ARID4B: |
| 1_Testes_ARID4B:                  | 117117 in gene           | 1 | 24.000 | 1 | 1_Testes_ARID4B: |
| 1_Testes_ARID4B:                  | 112475 in gene           | 1 | 24.000 | 1 | 1_Testes_ARID4B: |
| 1_Testes_ARID4B:                  | 99747 in gene            | 1 | 24.000 | 1 | 1_Testes_ARID4B: |
| 1_Testes_ARID4B:                  | 92142 in gene            | 1 | 24.000 | 1 | 1_Testes_ARID4B: |
| 1_Testes_ARID4B:                  | 86422 in gene            | 1 | 24.000 | 1 | 1_Testes_ARID4B: |
| 1_Testes_ARID4B:                  | 81270 in gene            | 1 | 24.000 | 1 | 1_Testes_ARID4B: |
| 1_Testes_ARID4B:                  | 75822 in gene            | 1 | 24.000 | 1 | 1_Testes_ARID4B: |
| 1_Testes_ARID4B:                  | 70040 in gene            | 1 | 24.000 | 1 | 1_Testes_ARID4B: |
| 1_Testes_ARID4B:                  | 64882 in gene            | 1 | 24.000 | 1 | 1_Testes_ARID4B: |
| 1_Testes_ARID4B:                  | 59788 in gene            | 1 | 24.000 | 1 | 1_Testes_ARID4B: |
| 1_Testes_ARID4B:                  | 55197 in gene            | 1 | 24.000 | 1 | 1_Testes_ARID4B: |
| 1_Testes_ARID4B:                  | 51203 in gene            | 1 | 24.000 | 1 | 1_Testes_ARID4B: |
| 1_Testes_ARID4B:                  | 45175 in gene            | 1 | 24.000 | 1 | 1_Testes_ARID4B: |
| 1_Testes_ARID4B:                  | 41396 in gene            | 1 | 24.000 | 1 | 1_Testes_ARID4B: |



|                                      |                          |   |        |   |                  |
|--------------------------------------|--------------------------|---|--------|---|------------------|
| 1_Testes_ARID4B:                     | 566 in gene              | 1 | 24.000 | 1 | 1_Testes_ARID4B: |
| 1_Testes_ARID4B:                     | -8103 upstream           | 1 | 24.000 | 1 | 1_Testes_ARID4B: |
| 1_Testes_ARID4B:                     | 339 in gene              | 1 | 26.000 | 1 | 1_Testes_ARID4B: |
| 1_Testes_ARID4B: 19916, -548         | downstream, upstream     | 1 | 21.500 | 2 | 1_Testes_ARID4B: |
| 1_Testes_ARID4B:                     | -23 upstream             | 1 | 17.000 | 1 | 1_Testes_ARID4B: |
| 1_Testes_ARID4B:                     | 14195 downstream         | 1 | 17.000 | 1 | 1_Testes_ARID4B: |
| 1_Testes_ARID4B:                     | 261 in gene              | 1 | 35.000 | 1 | 1_Testes_ARID4B: |
| 1_Testes_ARID4B:                     | 97 in gene               | 1 | 32.000 | 1 | 1_Testes_ARID4B: |
| 1_Testes_ARID4B:                     | 33 in gene               | 1 | 38.000 | 1 | 1_Testes_ARID4B: |
| 1_Testes_ARID4B:                     | 244 in gene              | 1 | 31.000 | 1 | 1_Testes_ARID4B: |
| 1_Testes_ARID4B:                     | -510 upstream            | 1 | 31.000 | 1 | 1_Testes_ARID4B: |
| 1_Testes_ARID4B:                     | 471 in gene              | 1 | 26.000 | 1 | 1_Testes_ARID4B: |
| 1_Testes_ARID4B: -2387, -3091, -4296 | upstream, upstream, u    | 1 | 18.667 | 3 | 1_Testes_ARID4B: |
| 1_Testes_ARID4B:                     | 161 in gene              | 1 | 26.000 | 1 | 1_Testes_ARID4B: |
| 1_Testes_ARID4B:                     | 307 in gene              | 1 | 19.000 | 1 | 1_Testes_ARID4B: |
| 1_Testes_ARID4B:                     | 201 in gene              | 1 | 20.000 | 1 | 1_Testes_ARID4B: |
| 1_Testes_ARID4B:                     | -6934 upstream           | 1 | 20.000 | 1 | 1_Testes_ARID4B: |
| 1_Testes_ARID4B:                     | 7 in gene                | 1 | 23.000 | 1 | 1_Testes_ARID4B: |
| 1_Testes_ARID4B:                     | -666 upstream            | 1 | 29.000 | 1 | 1_Testes_ARID4B: |
| 1_Testes_ARID4B:                     | 651 in gene              | 1 | 23.000 | 1 | 1_Testes_ARID4B: |
| 1_Testes_ARID4B:                     | -257 upstream            | 1 | 22.000 | 1 | 1_Testes_ARID4B: |
| 1_Testes_ARID4B:                     | 88 in gene               | 1 | 22.000 | 1 | 1_Testes_ARID4B: |
| 1_Testes_ARID4B:                     | -773 upstream            | 1 | 25.000 | 1 | 1_Testes_ARID4B: |
| 1_Testes_ARID4B:                     | 435 in gene              | 1 | 25.000 | 1 | 1_Testes_ARID4B: |
| 1_Testes_ARID4B:                     | 201 in gene              | 1 | 17.000 | 1 | 1_Testes_ARID4B: |
| 1_Testes_ARID4B:                     | 1663 in gene             | 1 | 13.000 | 1 | 1_Testes_ARID4B: |
| 1_Testes_ARID4B:                     | 91 in gene               | 1 | 27.000 | 1 | 1_Testes_ARID4B: |
| 1_Testes_ARID4B:                     | 348 in gene              | 1 | 22.000 | 1 | 1_Testes_ARID4B: |
| 1_Testes_ARID4B:                     | 861 in gene              | 1 | 22.000 | 1 | 1_Testes_ARID4B: |
| 1_Testes_ARID4B:                     | 99 in gene               | 1 | 24.000 | 1 | 1_Testes_ARID4B: |
| 1_Testes_ARID4B:                     | -87 upstream             | 1 | 22.000 | 1 | 1_Testes_ARID4B: |
| 1_Testes_ARID4B:                     | -241 upstream            | 1 | 17.000 | 1 | 1_Testes_ARID4B: |
| 1_Testes_ARID4B:                     | 507 in gene              | 1 | 48.000 | 1 | 1_Testes_ARID4B: |
| 1_Testes_ARID4B:                     | 460 in gene              | 1 | 24.000 | 1 | 1_Testes_ARID4B: |
| 1_Testes_ARID4B:                     | 778 in gene              | 1 | 39.000 | 1 | 1_Testes_ARID4B: |
| 1_Testes_ARID4B:                     | 38 in gene               | 1 | 24.000 | 1 | 1_Testes_ARID4B: |
| 1_Testes_ARID4B:                     | -284 upstream            | 1 | 15.000 | 1 | 1_Testes_ARID4B: |
| 1_Testes_ARID4B:                     | 324 in gene              | 1 | 25.000 | 1 | 1_Testes_ARID4B: |
| 1_Testes_ARID4B:                     | 34739 downstream         | 1 | 29.000 | 1 | 1_Testes_ARID4B: |
| 1_Testes_ARID4B:                     | 174 in gene              | 1 | 29.000 | 1 | 1_Testes_ARID4B: |
| 1_Testes_ARID4B:                     | -4684 upstream           | 1 | 20.000 | 1 | 1_Testes_ARID4B: |
| 1_Testes_ARID4B: 27905, 20369, 241   | in gene, in gene, in gen | 1 | 21.667 | 3 | 1_Testes_ARID4B: |
| 1_Testes_ARID4B: 63742, 56206, 36078 | downstream, downstre     | 1 | 21.667 | 3 | 1_Testes_ARID4B: |
| 1_Testes_ARID4B:                     | 220 in gene              | 1 | 49.000 | 1 | 1_Testes_ARID4B: |
| 1_Testes_ARID4B:                     | 260 in gene              | 1 | 21.000 | 1 | 1_Testes_ARID4B: |
| 1_Testes_ARID4B:                     | 263 in gene              | 1 | 21.000 | 1 | 1_Testes_ARID4B: |
| 1_Testes_ARID4B:                     | -9214 upstream           | 1 | 21.000 | 1 | 1_Testes_ARID4B: |

|                                         |                          |   |        |   |                  |
|-----------------------------------------|--------------------------|---|--------|---|------------------|
| 1_Testes_ARID4B:                        | 106 in gene              | 1 | 32.000 | 1 | 1_Testes_ARID4B: |
| 1_Testes_ARID4B: 1583, 271              | in gene, in gene         | 1 | 22.500 | 2 | 1_Testes_ARID4B: |
| 1_Testes_ARID4B: -948, -2260            | upstream, upstream       | 1 | 22.500 | 2 | 1_Testes_ARID4B: |
| 1_Testes_ARID4B:                        | -126 upstream            | 1 | 42.000 | 1 | 1_Testes_ARID4B: |
| 1_Testes_ARID4B:                        | -140 upstream            | 1 | 22.000 | 1 | 1_Testes_ARID4B: |
| 1_Testes_ARID4B:                        | 132 in gene              | 1 | 27.000 | 1 | 1_Testes_ARID4B: |
| 1_Testes_ARID4B:                        | 623 in gene              | 1 | 20.000 | 1 | 1_Testes_ARID4B: |
| 1_Testes_ARID4B:                        | 39 in gene               | 1 | 28.000 | 1 | 1_Testes_ARID4B: |
| 1_Testes_ARID4B:                        | 296 in gene              | 1 | 22.000 | 1 | 1_Testes_ARID4B: |
| 1_Testes_ARID4B:                        | 532 in gene              | 1 | 23.000 | 1 | 1_Testes_ARID4B: |
| 1_Testes_ARID4B:                        | -6456 upstream           | 1 | 23.000 | 1 | 1_Testes_ARID4B: |
| 1_Testes_ARID4B:                        | 30 in gene               | 1 | 21.000 | 1 | 1_Testes_ARID4B: |
| 1_Testes_ARID4B:                        | 337 in gene              | 1 | 18.000 | 1 | 1_Testes_ARID4B: |
| 1_Testes_ARID4B:                        | 1214 in gene             | 1 | 18.000 | 1 | 1_Testes_ARID4B: |
| 1_Testes_ARID4B:                        | 459 in gene              | 1 | 20.000 | 1 | 1_Testes_ARID4B: |
| 1_Testes_ARID4B:                        | 446 in gene              | 1 | 26.000 | 1 | 1_Testes_ARID4B: |
| 1_Testes_ARID4B:                        | 118 in gene              | 1 | 26.000 | 1 | 1_Testes_ARID4B: |
| 1_Testes_ARID4B: 45392, 117088          | in gene, in gene         | 1 | 19.000 | 2 | 1_Testes_ARID4B: |
| 1_Testes_ARID4B:                        | 65 in gene               | 1 | 18.000 | 1 | 1_Testes_ARID4B: |
| 1_Testes_ARID4B:                        | 198 in gene              | 1 | 22.000 | 1 | 1_Testes_ARID4B: |
| 1_Testes_ARID4B:                        | 153 in gene              | 1 | 26.000 | 1 | 1_Testes_ARID4B: |
| 1_Testes_ARID4B:                        | 149 in gene              | 1 | 34.000 | 1 | 1_Testes_ARID4B: |
| 1_Testes_ARID4B:                        | 144 in gene              | 1 | 38.000 | 1 | 1_Testes_ARID4B: |
| 1_Testes_ARID4B:                        | 111 in gene              | 1 | 19.000 | 1 | 1_Testes_ARID4B: |
| 1_Testes_ARID4B:                        | -104 upstream            | 1 | 33.000 | 1 | 1_Testes_ARID4B: |
| 1_Testes_ARID4B:                        | -159 upstream            | 1 | 33.000 | 1 | 1_Testes_ARID4B: |
| 1_Testes_ARID4B:                        | 237 in gene              | 1 | 38.000 | 1 | 1_Testes_ARID4B: |
| 1_Testes_ARID4B:                        | 196 in gene              | 1 | 32.000 | 1 | 1_Testes_ARID4B: |
| 1_Testes_ARID4B:                        | 24871 downstream         | 1 | 32.000 | 1 | 1_Testes_ARID4B: |
| 1_Testes_ARID4B:                        | 71 in gene               | 1 | 27.000 | 1 | 1_Testes_ARID4B: |
| 1_Testes_ARID4B:                        | 80 in gene               | 1 | 22.000 | 1 | 1_Testes_ARID4B: |
| 1_Testes_ARID4B:                        | -145 upstream            | 1 | 22.000 | 1 | 1_Testes_ARID4B: |
| 1_Testes_ARID4B:                        | 1023 in gene             | 1 | 30.000 | 1 | 1_Testes_ARID4B: |
| 1_Testes_ARID4B:                        | -17 upstream             | 1 | 18.000 | 1 | 1_Testes_ARID4B: |
| 1_Testes_ARID4B:                        | -192 upstream            | 1 | 27.000 | 1 | 1_Testes_ARID4B: |
| 1_Testes_ARID4B:                        | -27 upstream             | 1 | 16.000 | 1 | 1_Testes_ARID4B: |
| 1_Testes_ARID4B:                        | 138 in gene              | 1 | 22.000 | 1 | 1_Testes_ARID4B: |
| 1_Testes_ARID4B:                        | -8532 upstream           | 1 | 22.000 | 1 | 1_Testes_ARID4B: |
| 1_Testes_ARID4B:                        | 85 in gene               | 1 | 21.000 | 1 | 1_Testes_ARID4B: |
| 1_Testes_ARID4B:                        | 227 in gene              | 1 | 46.000 | 1 | 1_Testes_ARID4B: |
| 1_Testes_ARID4B:                        | -364 upstream            | 1 | 46.000 | 1 | 1_Testes_ARID4B: |
| 1_Testes_ARID4B: -5196, 12916           | upstream, downstream     | 1 | 43.000 | 2 | 1_Testes_ARID4B: |
| 1_Testes_ARID4B:                        | 44 in gene               | 1 | 40.000 | 1 | 1_Testes_ARID4B: |
| 1_Testes_ARID4B: -869, 251, 1531, 4091, | upstream, in gene, in g  | 1 | 28.000 | 6 | 1_Testes_ARID4B: |
| 1_Testes_ARID4B:                        | 704 in gene              | 1 | 29.000 | 1 | 1_Testes_ARID4B: |
| 1_Testes_ARID4B: 270, 239374, 325902    | in gene, in gene, in gen | 1 | 23.000 | 3 | 1_Testes_ARID4B: |
| 1_Testes_ARID4B:                        | 85 in gene               | 1 | 29.000 | 1 | 1_Testes_ARID4B: |

|                                       |                            |   |        |   |                  |
|---------------------------------------|----------------------------|---|--------|---|------------------|
| 1_Testes_ARID4B:                      | -39 upstream               | 1 | 19.000 | 1 | 1_Testes_ARID4B: |
| 1_Testes_ARID4B: 538, -326            | in gene, upstream          | 1 | 24.500 | 2 | 1_Testes_ARID4B: |
| 1_Testes_ARID4B: -712, 152            | upstream, in gene          | 1 | 24.500 | 2 | 1_Testes_ARID4B: |
| 1_Testes_ARID4B:                      | -6268 upstream             | 1 | 33.000 | 1 | 1_Testes_ARID4B: |
| 1_Testes_ARID4B:                      | 280 in gene                | 1 | 33.000 | 1 | 1_Testes_ARID4B: |
| 1_Testes_ARID4B:                      | 2071 in gene               | 1 | 16.000 | 1 | 1_Testes_ARID4B: |
| 1_Testes_ARID4B:                      | 122 in gene                | 1 | 16.000 | 1 | 1_Testes_ARID4B: |
| 1_Testes_ARID4B:                      | -817 upstream              | 1 | 21.000 | 1 | 1_Testes_ARID4B: |
| 1_Testes_ARID4B:                      | 305 in gene                | 1 | 22.000 | 1 | 1_Testes_ARID4B: |
| 1_Testes_ARID4B:                      | -9234 upstream             | 1 | 25.000 | 1 | 1_Testes_ARID4B: |
| 1_Testes_ARID4B:                      | 1091 in gene               | 1 | 25.000 | 1 | 1_Testes_ARID4B: |
| 1_Testes_ARID4B: 4655, 271            | in gene, in gene           | 1 | 21.000 | 2 | 1_Testes_ARID4B: |
| 1_Testes_ARID4B:                      | 138 in gene                | 1 | 27.000 | 1 | 1_Testes_ARID4B: |
| 1_Testes_ARID4B:                      | 626 in gene                | 1 | 23.000 | 1 | 1_Testes_ARID4B: |
| 1_Testes_ARID4B:                      | 781 in gene                | 1 | 26.000 | 1 | 1_Testes_ARID4B: |
| 1_Testes_ARID4B:                      | -386 upstream              | 1 | 17.000 | 1 | 1_Testes_ARID4B: |
| 1_Testes_ARID4B: 642, -1854           | in gene, upstream          | 1 | 24.000 | 2 | 1_Testes_ARID4B: |
| 1_Testes_ARID4B: -2238, 258           | upstream, in gene          | 1 | 24.000 | 2 | 1_Testes_ARID4B: |
| 1_Testes_ARID4B:                      | 177 in gene                | 1 | 19.000 | 1 | 1_Testes_ARID4B: |
| 1_Testes_ARID4B:                      | 431 in gene                | 1 | 17.000 | 1 | 1_Testes_ARID4B: |
| 1_Testes_ARID4B: 171, 2107, 65755     | in gene, in gene, downst   | 1 | 27.333 | 3 | 1_Testes_ARID4B: |
| 1_Testes_ARID4B:                      | 187 in gene                | 1 | 27.000 | 1 | 1_Testes_ARID4B: |
| 1_Testes_ARID4B:                      | 197 in gene                | 1 | 27.000 | 1 | 1_Testes_ARID4B: |
| 1_Testes_ARID4B: 111012, 612          | downstream, in gene        | 1 | 25.500 | 2 | 1_Testes_ARID4B: |
| 1_Testes_ARID4B:                      | 675 in gene                | 1 | 42.000 | 1 | 1_Testes_ARID4B: |
| 1_Testes_ARID4B:                      | 259 in gene                | 1 | 40.000 | 1 | 1_Testes_ARID4B: |
| 1_Testes_ARID4B:                      | -9127 upstream             | 1 | 31.000 | 1 | 1_Testes_ARID4B: |
| 1_Testes_ARID4B:                      | 8937 downstream            | 1 | 31.000 | 1 | 1_Testes_ARID4B: |
| 1_Testes_ARID4B:                      | 73 in gene                 | 1 | 31.000 | 1 | 1_Testes_ARID4B: |
| 1_Testes_ARID4B:                      | -5910 upstream             | 1 | 31.000 | 1 | 1_Testes_ARID4B: |
| 1_Testes_ARID4B:                      | 14509 downstream           | 1 | 31.000 | 1 | 1_Testes_ARID4B: |
| 1_Testes_ARID4B: -1241, -4249         | upstream, upstream         | 1 | 18.000 | 2 | 1_Testes_ARID4B: |
| 1_Testes_ARID4B: 114, 3122            | in gene, in gene           | 1 | 18.000 | 2 | 1_Testes_ARID4B: |
| 1_Testes_ARID4B: 9315, 6307           | downstream, in gene        | 1 | 18.000 | 2 | 1_Testes_ARID4B: |
| 1_Testes_ARID4B:                      | 776 in gene                | 1 | 23.000 | 1 | 1_Testes_ARID4B: |
| 1_Testes_ARID4B:                      | -779 upstream              | 1 | 31.000 | 1 | 1_Testes_ARID4B: |
| 1_Testes_ARID4B: 184, 103096, 105000, | 1 in gene, in gene, in gen | 1 | 34.250 | 4 | 1_Testes_ARID4B: |
| 1_Testes_ARID4B: 2099, 195, -9869     | in gene, in gene, upstre   | 1 | 31.333 | 3 | 1_Testes_ARID4B: |
| 1_Testes_ARID4B: 12049, 10145, 81     | downstream, downstre       | 1 | 31.333 | 3 | 1_Testes_ARID4B: |
| 1_Testes_ARID4B: 83196, 73132         | downstream, downstre       | 1 | 38.500 | 2 | 1_Testes_ARID4B: |
| 1_Testes_ARID4B:                      | 45353 downstream           | 1 | 25.000 | 1 | 1_Testes_ARID4B: |
| 1_Testes_ARID4B:                      | 51 in gene                 | 1 | 25.000 | 1 | 1_Testes_ARID4B: |
| 1_Testes_ARID4B:                      | -948 upstream              | 1 | 26.000 | 1 | 1_Testes_ARID4B: |
| 1_Testes_ARID4B:                      | 164 in gene                | 1 | 26.000 | 1 | 1_Testes_ARID4B: |
| 1_Testes_ARID4B:                      | 27795 downstream           | 1 | 26.000 | 1 | 1_Testes_ARID4B: |
| 1_Testes_ARID4B:                      | 420 in gene                | 1 | 26.000 | 1 | 1_Testes_ARID4B: |
| 1_Testes_ARID4B:                      | 15002 downstream           | 1 | 37.000 | 1 | 1_Testes_ARID4B: |

|                                         |                          |   |        |   |                  |
|-----------------------------------------|--------------------------|---|--------|---|------------------|
| 1_Testes_ARID4B:                        | 182 in gene              | 1 | 37.000 | 1 | 1_Testes_ARID4B: |
| 1_Testes_ARID4B:                        | -2396 upstream           | 1 | 37.000 | 1 | 1_Testes_ARID4B: |
| 1_Testes_ARID4B:562, 2162               | in gene, in gene         | 1 | 26.000 | 2 | 1_Testes_ARID4B: |
| 1_Testes_ARID4B:16837, 15237            | downstream, downstre     | 1 | 26.000 | 2 | 1_Testes_ARID4B: |
| 1_Testes_ARID4B:                        | -8398 upstream           | 1 | 25.000 | 1 | 1_Testes_ARID4B: |
| 1_Testes_ARID4B:                        | 180 in gene              | 1 | 25.000 | 1 | 1_Testes_ARID4B: |
| 1_Testes_ARID4B:11592, 936              | downstream, in gene      | 1 | 28.500 | 2 | 1_Testes_ARID4B: |
| 1_Testes_ARID4B:                        | 479 in gene              | 1 | 31.000 | 1 | 1_Testes_ARID4B: |
| 1_Testes_ARID4B:                        | 22815 downstream         | 1 | 31.000 | 1 | 1_Testes_ARID4B: |
| 1_Testes_ARID4B:                        | 8965 in gene             | 1 | 24.000 | 1 | 1_Testes_ARID4B: |
| 1_Testes_ARID4B:                        | -555 upstream            | 1 | 34.000 | 1 | 1_Testes_ARID4B: |
| 1_Testes_ARID4B:                        | 387 in gene              | 1 | 34.000 | 1 | 1_Testes_ARID4B: |
| 1_Testes_ARID4B:21503, 159              | downstream, in gene      | 1 | 34.500 | 2 | 1_Testes_ARID4B: |
| 1_Testes_ARID4B:                        | 208 in gene              | 1 | 35.000 | 1 | 1_Testes_ARID4B: |
| 1_Testes_ARID4B:                        | 13916 downstream         | 1 | 35.000 | 1 | 1_Testes_ARID4B: |
| 1_Testes_ARID4B:17478, 18486            | downstream, downstre     | 1 | 25.000 | 2 | 1_Testes_ARID4B: |
| 1_Testes_ARID4B:564, -444               | in gene, upstream        | 1 | 25.000 | 2 | 1_Testes_ARID4B: |
| 1_Testes_ARID4B:-792, 216               | upstream, in gene        | 1 | 25.000 | 2 | 1_Testes_ARID4B: |
| 1_Testes_ARID4B:9518, 12942             | downstream, downstre     | 1 | 29.000 | 2 | 1_Testes_ARID4B: |
| 1_Testes_ARID4B:347, -3077              | in gene, upstream        | 1 | 29.000 | 2 | 1_Testes_ARID4B: |
| 1_Testes_ARID4B:-3391, 33, 14273        | upstream, in gene, dow   | 1 | 27.667 | 3 | 1_Testes_ARID4B: |
| 1_Testes_ARID4B:11282, 7858, -6382      | downstream, downstre     | 1 | 27.667 | 3 | 1_Testes_ARID4B: |
| 1_Testes_ARID4B:190, 13278, 16350       | in gene, downstream, c   | 1 | 32.000 | 3 | 1_Testes_ARID4B: |
| 1_Testes_ARID4B:13456, 368, -2704       | downstream, in gene, u   | 1 | 32.000 | 3 | 1_Testes_ARID4B: |
| 1_Testes_ARID4B:-2487, 585              | upstream, in gene        | 1 | 35.500 | 2 | 1_Testes_ARID4B: |
| 1_Testes_ARID4B:22521, 19449            | downstream, downstre     | 1 | 35.500 | 2 | 1_Testes_ARID4B: |
| 1_Testes_ARID4B:511, -7873              | in gene, upstream        | 1 | 19.500 | 2 | 1_Testes_ARID4B: |
| 1_Testes_ARID4B:-8010, 374              | upstream, in gene        | 1 | 19.500 | 2 | 1_Testes_ARID4B: |
| 1_Testes_ARID4B:239, 8015               | in gene, downstream      | 1 | 27.500 | 2 | 1_Testes_ARID4B: |
| 1_Testes_ARID4B:7982, 206               | downstream, in gene      | 1 | 27.500 | 2 | 1_Testes_ARID4B: |
| 1_Testes_ARID4B:                        | -210 upstream            | 1 | 25.000 | 1 | 1_Testes_ARID4B: |
| 1_Testes_ARID4B:                        | -2917 upstream           | 1 | 21.000 | 1 | 1_Testes_ARID4B: |
| 1_Testes_ARID4B:22284, 3196, 364, -187  | in gene, in gene, in gen | 1 | 25.000 | 4 | 1_Testes_ARID4B: |
| 1_Testes_ARID4B:-3419, -587, 1653       | upstream, upstream, in   | 1 | 26.333 | 3 | 1_Testes_ARID4B: |
| 1_Testes_ARID4B:-2963, -5139            | upstream, upstream       | 1 | 35.000 | 2 | 1_Testes_ARID4B: |
| 1_Testes_ARID4B:386, -1790              | in gene, upstream        | 1 | 35.000 | 2 | 1_Testes_ARID4B: |
| 1_Testes_ARID4B:2441, 265, -10391       | downstream, in gene, u   | 1 | 30.333 | 3 | 1_Testes_ARID4B: |
| 1_Testes_ARID4B:11482, 9306, -1350, -48 | downstream, downstre     | 1 | 26.750 | 4 | 1_Testes_ARID4B: |
| 1_Testes_ARID4B:-9448, 1208, 4664       | upstream, in gene, in g  | 1 | 22.333 | 3 | 1_Testes_ARID4B: |
| 1_Testes_ARID4B:                        | 1225 in gene             | 1 | 16.000 | 1 | 1_Testes_ARID4B: |
| 1_Testes_ARID4B:1551, -689              | in gene, upstream        | 1 | 30.000 | 2 | 1_Testes_ARID4B: |
| 1_Testes_ARID4B:                        | 528 in gene              | 1 | 28.000 | 1 | 1_Testes_ARID4B: |
| 1_Testes_ARID4B:                        | 241 in gene              | 1 | 22.000 | 1 | 1_Testes_ARID4B: |
| 1_Testes_ARID4B:                        | 2964 in gene             | 1 | 22.000 | 1 | 1_Testes_ARID4B: |
| 1_Testes_ARID4B:                        | -2079 upstream           | 1 | 28.000 | 1 | 1_Testes_ARID4B: |
| 1_Testes_ARID4B:400, 15163              | in gene, downstream      | 1 | 35.500 | 2 | 1_Testes_ARID4B: |
| 1_Testes_ARID4B:10775, -3988            | downstream, upstream     | 1 | 35.500 | 2 | 1_Testes_ARID4B: |

|                                      |                         |   |        |   |                  |
|--------------------------------------|-------------------------|---|--------|---|------------------|
| 1_Testes_ARID4B: -10912, 3851        | upstream, downstream    | 1 | 35.500 | 2 | 1_Testes_ARID4B: |
| 1_Testes_ARID4B: 532, 9748           | in gene, downstream     | 1 | 30.500 | 2 | 1_Testes_ARID4B: |
| 1_Testes_ARID4B: 6111, -3105         | downstream, upstream    | 1 | 30.500 | 2 | 1_Testes_ARID4B: |
| 1_Testes_ARID4B: 15448, 6232, -7837  | downstream, in gene, u  | 1 | 29.000 | 3 | 1_Testes_ARID4B: |
| 1_Testes_ARID4B: -9083, 4986         | upstream, downstream    | 1 | 22.000 | 2 | 1_Testes_ARID4B: |
| 1_Testes_ARID4B: 13936, -133         | downstream, upstream    | 1 | 22.000 | 2 | 1_Testes_ARID4B: |
| 1_Testes_ARID4B: -73                 | upstream                | 1 | 26.000 | 1 | 1_Testes_ARID4B: |
| 1_Testes_ARID4B: 497                 | in gene                 | 1 | 32.000 | 1 | 1_Testes_ARID4B: |
| 1_Testes_ARID4B: 9226                | downstream              | 1 | 16.000 | 1 | 1_Testes_ARID4B: |
| 1_Testes_ARID4B: 213, -5984          | in gene, upstream       | 1 | 27.000 | 2 | 1_Testes_ARID4B: |
| 1_Testes_ARID4B: -6041, 156          | upstream, in gene       | 1 | 27.000 | 2 | 1_Testes_ARID4B: |
| 1_Testes_ARID4B: 352                 | in gene                 | 1 | 51.000 | 1 | 1_Testes_ARID4B: |
| 1_Testes_ARID4B: 28935               | downstream              | 1 | 22.000 | 1 | 1_Testes_ARID4B: |
| 1_Testes_ARID4B: 413                 | in gene                 | 1 | 22.000 | 1 | 1_Testes_ARID4B: |
| 1_Testes_ARID4B: -5858               | upstream                | 1 | 22.000 | 1 | 1_Testes_ARID4B: |
| 1_Testes_ARID4B: 758                 | in gene                 | 1 | 32.000 | 1 | 1_Testes_ARID4B: |
| 1_Testes_ARID4B: 9678                | in gene                 | 1 | 26.000 | 1 | 1_Testes_ARID4B: |
| 1_Testes_ARID4B: 281                 | in gene                 | 1 | 23.000 | 1 | 1_Testes_ARID4B: |
| 1_Testes_ARID4B: -10376              | upstream                | 1 | 23.000 | 1 | 1_Testes_ARID4B: |
| 1_Testes_ARID4B: 17891               | downstream              | 1 | 23.000 | 1 | 1_Testes_ARID4B: |
| 1_Testes_ARID4B: -8444               | upstream                | 1 | 30.000 | 1 | 1_Testes_ARID4B: |
| 1_Testes_ARID4B: 691, -7517          | in gene, upstream       | 1 | 31.500 | 2 | 1_Testes_ARID4B: |
| 1_Testes_ARID4B: 8626, 418, -8862    | downstream, in gene, u  | 1 | 28.667 | 3 | 1_Testes_ARID4B: |
| 1_Testes_ARID4B: -8031, 177, 9457    | upstream, in gene, in g | 1 | 28.667 | 3 | 1_Testes_ARID4B: |
| 1_Testes_ARID4B: 18440, -4808, -5800 | downstream, upstream    | 1 | 22.667 | 3 | 1_Testes_ARID4B: |
| 1_Testes_ARID4B: -488, 504, 12248    | upstream, in gene, dow  | 1 | 22.333 | 3 | 1_Testes_ARID4B: |
| 1_Testes_ARID4B: 5901, 4909, -6835   | downstream, downstre    | 1 | 22.333 | 3 | 1_Testes_ARID4B: |
| 1_Testes_ARID4B: 13091, 12099, 355   | downstream, downstre    | 1 | 22.333 | 3 | 1_Testes_ARID4B: |
| 1_Testes_ARID4B: 4976                | downstream              | 1 | 22.000 | 1 | 1_Testes_ARID4B: |
| 1_Testes_ARID4B: 8741                | downstream              | 1 | 22.000 | 1 | 1_Testes_ARID4B: |
| 1_Testes_ARID4B: -8835               | upstream                | 1 | 22.000 | 1 | 1_Testes_ARID4B: |
| 1_Testes_ARID4B: 320, 100011, 149408 | in gene, in gene, downs | 1 | 21.000 | 3 | 1_Testes_ARID4B: |
| 1_Testes_ARID4B: 108                 | in gene                 | 1 | 24.000 | 1 | 1_Testes_ARID4B: |
| 1_Testes_ARID4B: 11440               | downstream              | 1 | 24.000 | 1 | 1_Testes_ARID4B: |
| 1_Testes_ARID4B: -90                 | upstream                | 1 | 34.000 | 1 | 1_Testes_ARID4B: |
| 1_Testes_ARID4B: -965                | upstream                | 1 | 24.000 | 1 | 1_Testes_ARID4B: |
| 1_Testes_ARID4B: 73044, 628          | downstream, in gene     | 1 | 22.000 | 2 | 1_Testes_ARID4B: |
| 1_Testes_ARID4B: 338                 | in gene                 | 1 | 33.000 | 1 | 1_Testes_ARID4B: |
| 1_Testes_ARID4B: -315                | upstream                | 1 | 33.000 | 1 | 1_Testes_ARID4B: |
| 1_Testes_ARID4B: -153, 823, 4519     | upstream, in gene, in g | 1 | 26.333 | 3 | 1_Testes_ARID4B: |
| 1_Testes_ARID4B: 65817, 64841, 61145 | downstream, downstre    | 1 | 26.333 | 3 | 1_Testes_ARID4B: |
| 1_Testes_ARID4B: 9897                | in gene                 | 1 | 26.000 | 1 | 1_Testes_ARID4B: |
| 1_Testes_ARID4B: -10015, 12465       | upstream, downstream    | 1 | 29.000 | 2 | 1_Testes_ARID4B: |
| 1_Testes_ARID4B: 10086               | downstream              | 1 | 32.000 | 1 | 1_Testes_ARID4B: |
| 1_Testes_ARID4B: 113, 6529           | in gene, downstream     | 1 | 26.500 | 2 | 1_Testes_ARID4B: |
| 1_Testes_ARID4B: -4766, 1650         | upstream, downstream    | 1 | 26.500 | 2 | 1_Testes_ARID4B: |
| 1_Testes_ARID4B: -5472, 944, 15776   | upstream, in gene, dow  | 1 | 29.000 | 3 | 1_Testes_ARID4B: |

|                               |                      |   |        |   |                  |
|-------------------------------|----------------------|---|--------|---|------------------|
| 1_Testes_ARID4B: 97, 17297    | in gene, downstream  | 1 | 35.000 | 2 | 1_Testes_ARID4B: |
| 1_Testes_ARID4B:              | 3404 downstream      | 1 | 36.000 | 1 | 1_Testes_ARID4B: |
| 1_Testes_ARID4B:              | 67 in gene           | 1 | 36.000 | 1 | 1_Testes_ARID4B: |
| 1_Testes_ARID4B:              | 12017 in gene        | 1 | 36.000 | 1 | 1_Testes_ARID4B: |
| 1_Testes_ARID4B: -8414, -9534 | upstream, upstream   | 1 | 23.000 | 2 | 1_Testes_ARID4B: |
| 1_Testes_ARID4B: -8410, -9530 | upstream, upstream   | 1 | 23.000 | 2 | 1_Testes_ARID4B: |
| 1_Testes_ARID4B: 8281, 9401   | downstream, downstre | 1 | 23.000 | 2 | 1_Testes_ARID4B: |
| 1_Testes_ARID4B: 4197, 5317   | in gene, downstream  | 1 | 23.000 | 2 | 1_Testes_ARID4B: |
| 1_Testes_ARID4B: -927, 193    | upstream, in gene    | 1 | 23.000 | 2 | 1_Testes_ARID4B: |
| 1_Testes_ARID4B:              | 9575 downstream      | 1 | 24.000 | 1 | 1_Testes_ARID4B: |
| 1_Testes_ARID4B:              | -612 upstream        | 1 | 24.000 | 1 | 1_Testes_ARID4B: |
| 1_Testes_ARID4B: 274, 12322   | in gene, downstream  | 1 | 29.000 | 2 | 1_Testes_ARID4B: |
| 1_Testes_ARID4B:              | 96 in gene           | 1 | 34.000 | 1 | 1_Testes_ARID4B: |
| 1_Testes_ARID4B:              | 13446 downstream     | 1 | 25.000 | 1 | 1_Testes_ARID4B: |
| 1_Testes_ARID4B:              | 255 in gene          | 1 | 25.000 | 1 | 1_Testes_ARID4B: |
| 1_Testes_ARID4B:              | 220 in gene          | 1 | 19.000 | 1 | 1_Testes_ARID4B: |
| 1_Testes_ARID4B:              | 205 in gene          | 1 | 27.000 | 1 | 1_Testes_ARID4B: |
| 1_Testes_ARID4B:              | 113 in gene          | 1 | 41.000 | 1 | 1_Testes_ARID4B: |
| 1_Testes_ARID4B:              | 18817 downstream     | 1 | 41.000 | 1 | 1_Testes_ARID4B: |
| 1_Testes_ARID4B:              | 23372 downstream     | 1 | 22.000 | 1 | 1_Testes_ARID4B: |
| 1_Testes_ARID4B:              | 52 in gene           | 1 | 22.000 | 1 | 1_Testes_ARID4B: |
| 1_Testes_ARID4B:              | 159 in gene          | 1 | 25.000 | 1 | 1_Testes_ARID4B: |
| 1_Testes_ARID4B:              | 232 in gene          | 1 | 32.000 | 1 | 1_Testes_ARID4B: |
| 1_Testes_ARID4B:              | 317 in gene          | 1 | 30.000 | 1 | 1_Testes_ARID4B: |
| 1_Testes_ARID4B:              | 67838 downstream     | 1 | 25.000 | 1 | 1_Testes_ARID4B: |
| 1_Testes_ARID4B:              | 519 in gene          | 1 | 25.000 | 1 | 1_Testes_ARID4B: |
| 1_Testes_ARID4B:              | -391 upstream        | 1 | 29.000 | 1 | 1_Testes_ARID4B: |
| 1_Testes_ARID4B: 356, 30564   | in gene, downstream  | 1 | 23.000 | 2 | 1_Testes_ARID4B: |
| 1_Testes_ARID4B:              | 430 in gene          | 1 | 17.000 | 1 | 1_Testes_ARID4B: |
| 1_Testes_ARID4B:              | -215 upstream        | 1 | 19.000 | 1 | 1_Testes_ARID4B: |
| 1_Testes_ARID4B:              | -411 upstream        | 1 | 19.000 | 1 | 1_Testes_ARID4B: |
| 1_Testes_ARID4B:              | -1486 upstream       | 1 | 22.000 | 1 | 1_Testes_ARID4B: |
| 1_Testes_ARID4B:              | 119 in gene          | 1 | 22.000 | 1 | 1_Testes_ARID4B: |
| 1_Testes_ARID4B:              | 65 in gene           | 1 | 25.000 | 1 | 1_Testes_ARID4B: |
| 1_Testes_ARID4B:              | -33 upstream         | 1 | 18.000 | 1 | 1_Testes_ARID4B: |
| 1_Testes_ARID4B:              | 193 in gene          | 1 | 32.000 | 1 | 1_Testes_ARID4B: |
| 1_Testes_ARID4B:              | 3128 in gene         | 1 | 26.000 | 1 | 1_Testes_ARID4B: |
| 1_Testes_ARID4B:              | 8978 downstream      | 1 | 26.000 | 1 | 1_Testes_ARID4B: |
| 1_Testes_ARID4B:              | 844 in gene          | 1 | 35.000 | 1 | 1_Testes_ARID4B: |
| 1_Testes_ARID4B:              | 22693 downstream     | 1 | 16.000 | 1 | 1_Testes_ARID4B: |
| 1_Testes_ARID4B:              | 348 in gene          | 1 | 16.000 | 1 | 1_Testes_ARID4B: |
| 1_Testes_ARID4B:              | -3766 upstream       | 1 | 16.000 | 1 | 1_Testes_ARID4B: |
| 1_Testes_ARID4B: 671, -913    | in gene, upstream    | 1 | 23.500 | 2 | 1_Testes_ARID4B: |
| 1_Testes_ARID4B:              | -221 upstream        | 1 | 23.000 | 1 | 1_Testes_ARID4B: |
| 1_Testes_ARID4B:              | 146 in gene          | 1 | 24.000 | 1 | 1_Testes_ARID4B: |
| 1_Testes_ARID4B:              | -232 upstream        | 1 | 24.000 | 1 | 1_Testes_ARID4B: |
| 1_Testes_ARID4B:              | 881 in gene          | 1 | 36.000 | 1 | 1_Testes_ARID4B: |

|                               |                     |   |        |   |                  |
|-------------------------------|---------------------|---|--------|---|------------------|
| 1_Testes_ARID4B:              | 1021 in gene        | 1 | 22.000 | 1 | 1_Testes_ARID4B: |
| 1_Testes_ARID4B:              | 133 in gene         | 1 | 22.000 | 1 | 1_Testes_ARID4B: |
| 1_Testes_ARID4B:              | 223 in gene         | 1 | 23.000 | 1 | 1_Testes_ARID4B: |
| 1_Testes_ARID4B:              | 395 in gene         | 1 | 22.000 | 1 | 1_Testes_ARID4B: |
| 1_Testes_ARID4B:              | 197 in gene         | 1 | 29.000 | 1 | 1_Testes_ARID4B: |
| 1_Testes_ARID4B:              | -400 upstream       | 1 | 29.000 | 1 | 1_Testes_ARID4B: |
| 1_Testes_ARID4B: 500, 42436   | in gene, downstream | 1 | 21.500 | 2 | 1_Testes_ARID4B: |
| 1_Testes_ARID4B:              | -20 upstream        | 1 | 23.000 | 1 | 1_Testes_ARID4B: |
| 1_Testes_ARID4B:              | 683 in gene         | 1 | 29.000 | 1 | 1_Testes_ARID4B: |
| 1_Testes_ARID4B:              | 10 in gene          | 1 | 29.000 | 1 | 1_Testes_ARID4B: |
| 1_Testes_ARID4B:              | -937 upstream       | 1 | 20.000 | 1 | 1_Testes_ARID4B: |
| 1_Testes_ARID4B:              | 419 in gene         | 1 | 20.000 | 1 | 1_Testes_ARID4B: |
| 1_Testes_ARID4B:              | 362 in gene         | 1 | 24.000 | 1 | 1_Testes_ARID4B: |
| 1_Testes_ARID4B:              | 470 in gene         | 1 | 31.000 | 1 | 1_Testes_ARID4B: |
| 1_Testes_ARID4B:              | -7735 upstream      | 1 | 31.000 | 1 | 1_Testes_ARID4B: |
| 1_Testes_ARID4B:              | 297 in gene         | 1 | 20.000 | 1 | 1_Testes_ARID4B: |
| 1_Testes_ARID4B:              | 376 in gene         | 1 | 21.000 | 1 | 1_Testes_ARID4B: |
| 1_Testes_ARID4B: -316, 134388 | upstream, in gene   | 1 | 23.000 | 2 | 1_Testes_ARID4B: |
| 1_Testes_ARID4B: 78675, -205  | in gene, upstream   | 1 | 27.000 | 2 | 1_Testes_ARID4B: |
| 1_Testes_ARID4B:              | 322 in gene         | 1 | 32.000 | 1 | 1_Testes_ARID4B: |
| 1_Testes_ARID4B:              | -18 upstream        | 1 | 25.000 | 1 | 1_Testes_ARID4B: |
| 1_Testes_ARID4B: 374, 104982  | in gene, downstream | 1 | 20.500 | 2 | 1_Testes_ARID4B: |
| 1_Testes_ARID4B:              | 151 in gene         | 1 | 20.000 | 1 | 1_Testes_ARID4B: |
| 1_Testes_ARID4B:              | 1704 in gene        | 1 | 25.000 | 1 | 1_Testes_ARID4B: |
| 1_Testes_ARID4B:              | -290 upstream       | 1 | 25.000 | 1 | 1_Testes_ARID4B: |
| 1_Testes_ARID4B:              | 237 in gene         | 1 | 21.000 | 1 | 1_Testes_ARID4B: |
| 1_Testes_ARID4B:              | 1616 in gene        | 1 | 21.000 | 1 | 1_Testes_ARID4B: |
| 1_Testes_ARID4B:              | 66 in gene          | 1 | 25.000 | 1 | 1_Testes_ARID4B: |
| 1_Testes_ARID4B:              | 193 in gene         | 1 | 30.000 | 1 | 1_Testes_ARID4B: |
| 1_Testes_ARID4B:              | -61 upstream        | 1 | 27.000 | 1 | 1_Testes_ARID4B: |
| 1_Testes_ARID4B:              | -234 upstream       | 1 | 27.000 | 1 | 1_Testes_ARID4B: |
| 1_Testes_ARID4B:              | 281 in gene         | 1 | 34.000 | 1 | 1_Testes_ARID4B: |
| 1_Testes_ARID4B:              | 7246 downstream     | 1 | 34.000 | 1 | 1_Testes_ARID4B: |
| 1_Testes_ARID4B:              | 367 in gene         | 1 | 33.000 | 1 | 1_Testes_ARID4B: |
| 1_Testes_ARID4B: 38, -826     | in gene, upstream   | 1 | 26.000 | 2 | 1_Testes_ARID4B: |
| 1_Testes_ARID4B: -800, 64     | upstream, in gene   | 1 | 26.000 | 2 | 1_Testes_ARID4B: |
| 1_Testes_ARID4B:              | -9 upstream         | 1 | 24.000 | 1 | 1_Testes_ARID4B: |
| 1_Testes_ARID4B:              | -6 upstream         | 1 | 23.000 | 1 | 1_Testes_ARID4B: |
| 1_Testes_ARID4B:              | -393 upstream       | 1 | 28.000 | 1 | 1_Testes_ARID4B: |
| 1_Testes_ARID4B:              | 274 in gene         | 1 | 31.000 | 1 | 1_Testes_ARID4B: |
| 1_Testes_ARID4B:              | 959 in gene         | 1 | 29.000 | 1 | 1_Testes_ARID4B: |
| 1_Testes_ARID4B:              | -516 upstream       | 1 | 21.000 | 1 | 1_Testes_ARID4B: |
| 1_Testes_ARID4B:              | 552 in gene         | 1 | 29.000 | 1 | 1_Testes_ARID4B: |
| 1_Testes_ARID4B: 559, -6849   | in gene, upstream   | 1 | 37.000 | 2 | 1_Testes_ARID4B: |
| 1_Testes_ARID4B: -7039, 369   | upstream, in gene   | 1 | 37.000 | 2 | 1_Testes_ARID4B: |
| 1_Testes_ARID4B: 33053, -627  | in gene, upstream   | 1 | 25.500 | 2 | 1_Testes_ARID4B: |
| 1_Testes_ARID4B:              | 397 in gene         | 1 | 26.000 | 1 | 1_Testes_ARID4B: |

|                                         |                         |   |        |   |                  |
|-----------------------------------------|-------------------------|---|--------|---|------------------|
| 1_Testes_ARID4B:                        | 375 in gene             | 1 | 25.000 | 1 | 1_Testes_ARID4B: |
| 1_Testes_ARID4B:                        | 66 in gene              | 1 | 42.000 | 1 | 1_Testes_ARID4B: |
| 1_Testes_ARID4B:                        | 398 in gene             | 1 | 17.000 | 1 | 1_Testes_ARID4B: |
| 1_Testes_ARID4B:                        | -576 upstream           | 1 | 26.000 | 1 | 1_Testes_ARID4B: |
| 1_Testes_ARID4B:                        | 79 in gene              | 1 | 26.000 | 1 | 1_Testes_ARID4B: |
| 1_Testes_ARID4B:                        | 765 in gene             | 1 | 29.000 | 1 | 1_Testes_ARID4B: |
| 1_Testes_ARID4B:                        | 18 in gene              | 1 | 20.000 | 1 | 1_Testes_ARID4B: |
| 1_Testes_ARID4B:                        | 66198 downstream        | 1 | 26.000 | 1 | 1_Testes_ARID4B: |
| 1_Testes_ARID4B:                        | 353 in gene             | 1 | 26.000 | 1 | 1_Testes_ARID4B: |
| 1_Testes_ARID4B:                        | 495 in gene             | 1 | 23.000 | 1 | 1_Testes_ARID4B: |
| 1_Testes_ARID4B:                        | -156 upstream           | 1 | 27.000 | 1 | 1_Testes_ARID4B: |
| 1_Testes_ARID4B:                        | 120910 downstream       | 1 | 27.000 | 1 | 1_Testes_ARID4B: |
| 1_Testes_ARID4B:                        | 366 in gene             | 1 | 26.000 | 1 | 1_Testes_ARID4B: |
| 1_Testes_ARID4B:                        | 356 in gene             | 1 | 23.000 | 1 | 1_Testes_ARID4B: |
| 1_Testes_ARID4B:                        | 169 in gene             | 1 | 30.000 | 1 | 1_Testes_ARID4B: |
| 1_Testes_ARID4B:                        | 641 in gene             | 1 | 24.000 | 1 | 1_Testes_ARID4B: |
| 1_Testes_ARID4B:                        | 258 in gene             | 1 | 42.000 | 1 | 1_Testes_ARID4B: |
| 1_Testes_ARID4B:                        | -416 upstream           | 1 | 42.000 | 1 | 1_Testes_ARID4B: |
| 1_Testes_ARID4B: 48080, -592            | downstream, upstream    | 1 | 36.500 | 2 | 1_Testes_ARID4B: |
| 1_Testes_ARID4B:                        | -35 upstream            | 1 | 31.000 | 1 | 1_Testes_ARID4B: |
| 1_Testes_ARID4B:                        | 579 in gene             | 1 | 38.000 | 1 | 1_Testes_ARID4B: |
| 1_Testes_ARID4B:                        | 8454 in gene            | 1 | 25.000 | 1 | 1_Testes_ARID4B: |
| 1_Testes_ARID4B:                        | 347 in gene             | 1 | 23.000 | 1 | 1_Testes_ARID4B: |
| 1_Testes_ARID4B:                        | 2459 in gene            | 1 | 21.000 | 1 | 1_Testes_ARID4B: |
| 1_Testes_ARID4B:                        | 167 in gene             | 1 | 22.000 | 1 | 1_Testes_ARID4B: |
| 1_Testes_ARID4B:                        | 8 in gene               | 1 | 25.000 | 1 | 1_Testes_ARID4B: |
| 1_Testes_ARID4B:                        | -31 upstream            | 1 | 25.000 | 1 | 1_Testes_ARID4B: |
| 1_Testes_ARID4B: 60390, -154            | in gene, upstream       | 1 | 18.000 | 2 | 1_Testes_ARID4B: |
| 1_Testes_ARID4B:                        | 185 in gene             | 1 | 32.000 | 1 | 1_Testes_ARID4B: |
| 1_Testes_ARID4B: 37877, 405             | downstream, in gene     | 1 | 30.500 | 2 | 1_Testes_ARID4B: |
| 1_Testes_ARID4B:                        | 28804 downstream        | 1 | 29.000 | 1 | 1_Testes_ARID4B: |
| 1_Testes_ARID4B: -242, 78126            | upstream, in gene       | 1 | 17.000 | 2 | 1_Testes_ARID4B: |
| 1_Testes_ARID4B:                        | 418 in gene             | 1 | 19.000 | 1 | 1_Testes_ARID4B: |
| 1_Testes_ARID4B:                        | 177 in gene             | 1 | 32.000 | 1 | 1_Testes_ARID4B: |
| 1_Testes_ARID4B:                        | 16864 downstream        | 1 | 36.000 | 1 | 1_Testes_ARID4B: |
| 1_Testes_ARID4B: 234, -9355             | in gene, upstream       | 1 | 29.000 | 2 | 1_Testes_ARID4B: |
| 1_Testes_ARID4B: -350, 9239             | upstream, downstream    | 1 | 29.000 | 2 | 1_Testes_ARID4B: |
| 1_Testes_ARID4B: -8968, 621             | upstream, in gene       | 1 | 29.000 | 2 | 1_Testes_ARID4B: |
| 1_Testes_ARID4B: -1371, 725, 2581, 3749 | upstream, in gene, in g | 1 | 26.500 | 4 | 1_Testes_ARID4B: |
| 1_Testes_ARID4B:                        | 1412 in gene            | 1 | 19.000 | 1 | 1_Testes_ARID4B: |
| 1_Testes_ARID4B:                        | 321 in gene             | 1 | 24.000 | 1 | 1_Testes_ARID4B: |
| 1_Testes_ARID4B: 628, -6460             | in gene, upstream       | 1 | 23.000 | 2 | 1_Testes_ARID4B: |
| 1_Testes_ARID4B: 7307, 219              | downstream, in gene     | 1 | 23.000 | 2 | 1_Testes_ARID4B: |
| 1_Testes_ARID4B: 41035, 33947, -53      | downstream, downstre    | 1 | 25.333 | 3 | 1_Testes_ARID4B: |
| 1_Testes_ARID4B:                        | 32459 downstream        | 1 | 30.000 | 1 | 1_Testes_ARID4B: |
| 1_Testes_ARID4B:                        | 312 in gene             | 1 | 21.000 | 1 | 1_Testes_ARID4B: |
| 1_Testes_ARID4B:                        | -5302 upstream          | 1 | 21.000 | 1 | 1_Testes_ARID4B: |



|                                      |                      |   |        |   |                  |
|--------------------------------------|----------------------|---|--------|---|------------------|
| 1_Testes_ARID4B:                     | 91 in gene           | 1 | 24.000 | 1 | 1_Testes_ARID4B: |
| 1_Testes_ARID4B: 197, 19685          | in gene, downstream  | 1 | 41.500 | 2 | 1_Testes_ARID4B: |
| 1_Testes_ARID4B:                     | 361 in gene          | 1 | 22.000 | 1 | 1_Testes_ARID4B: |
| 1_Testes_ARID4B:                     | 4565 downstream      | 1 | 26.000 | 1 | 1_Testes_ARID4B: |
| 1_Testes_ARID4B: 11861, -363         | in gene, upstream    | 1 | 23.000 | 2 | 1_Testes_ARID4B: |
| 1_Testes_ARID4B:                     | -3870 upstream       | 1 | 20.000 | 1 | 1_Testes_ARID4B: |
| 1_Testes_ARID4B: 685, -3491          | in gene, upstream    | 1 | 30.500 | 2 | 1_Testes_ARID4B: |
| 1_Testes_ARID4B: 207, 4383           | in gene, in gene     | 1 | 30.500 | 2 | 1_Testes_ARID4B: |
| 1_Testes_ARID4B: 22212, 18036, -2124 | downstream, downstre | 1 | 30.000 | 3 | 1_Testes_ARID4B: |
| 1_Testes_ARID4B:                     | 1096 in gene         | 1 | 29.000 | 1 | 1_Testes_ARID4B: |
| 1_Testes_ARID4B: 9380, -10300        | downstream, upstream | 1 | 29.000 | 2 | 1_Testes_ARID4B: |
| 1_Testes_ARID4B:                     | 6198 downstream      | 1 | 29.000 | 1 | 1_Testes_ARID4B: |
| 1_Testes_ARID4B:                     | 28 in gene           | 1 | 29.000 | 1 | 1_Testes_ARID4B: |
| 1_Testes_ARID4B:                     | -7920 upstream       | 1 | 29.000 | 1 | 1_Testes_ARID4B: |
| 1_Testes_ARID4B: -592, 1104          | upstream, in gene    | 1 | 34.000 | 2 | 1_Testes_ARID4B: |
| 1_Testes_ARID4B:                     | 61 in gene           | 1 | 22.000 | 1 | 1_Testes_ARID4B: |
| 1_Testes_ARID4B:                     | -341 upstream        | 1 | 22.000 | 1 | 1_Testes_ARID4B: |
| 1_Testes_ARID4B:                     | 213 in gene          | 1 | 20.000 | 1 | 1_Testes_ARID4B: |
| 1_Testes_ARID4B:                     | 278 in gene          | 1 | 20.000 | 1 | 1_Testes_ARID4B: |
| 1_Testes_ARID4B:                     | 476 in gene          | 1 | 30.000 | 1 | 1_Testes_ARID4B: |
| 1_Testes_ARID4B:                     | -7622 upstream       | 1 | 22.000 | 1 | 1_Testes_ARID4B: |
| 1_Testes_ARID4B: -68, 74412          | upstream, in gene    | 1 | 24.000 | 2 | 1_Testes_ARID4B: |
| 1_Testes_ARID4B:                     | 211179 downstream    | 1 | 26.000 | 1 | 1_Testes_ARID4B: |
| 1_Testes_ARID4B:                     | 20 in gene           | 1 | 21.000 | 1 | 1_Testes_ARID4B: |
| 1_Testes_ARID4B:                     | 105585 downstream    | 1 | 21.000 | 1 | 1_Testes_ARID4B: |
| 1_Testes_ARID4B:                     | -93 upstream         | 1 | 21.000 | 1 | 1_Testes_ARID4B: |
| 1_Testes_ARID4B:                     | -10649 upstream      | 1 | 21.000 | 1 | 1_Testes_ARID4B: |
| 1_Testes_ARID4B:                     | 163 in gene          | 1 | 27.000 | 1 | 1_Testes_ARID4B: |
| 1_Testes_ARID4B:                     | 78 in gene           | 1 | 36.000 | 1 | 1_Testes_ARID4B: |
| 1_Testes_ARID4B:                     | 2558 in gene         | 1 | 20.000 | 1 | 1_Testes_ARID4B: |
| 1_Testes_ARID4B: 2966, 19318         | in gene, in gene     | 1 | 34.500 | 2 | 1_Testes_ARID4B: |
| 1_Testes_ARID4B:                     | 301 in gene          | 1 | 24.000 | 1 | 1_Testes_ARID4B: |
| 1_Testes_ARID4B:                     | 26 in gene           | 1 | 31.000 | 1 | 1_Testes_ARID4B: |
| 1_Testes_ARID4B:                     | 532 in gene          | 1 | 31.000 | 1 | 1_Testes_ARID4B: |
| 1_Testes_ARID4B:                     | -106 upstream        | 1 | 22.000 | 1 | 1_Testes_ARID4B: |
| 1_Testes_ARID4B:                     | 11641 in gene        | 1 | 31.000 | 1 | 1_Testes_ARID4B: |
| 1_Testes_ARID4B:                     | 10042 downstream     | 1 | 31.000 | 1 | 1_Testes_ARID4B: |
| 1_Testes_ARID4B:                     | 34 in gene           | 1 | 24.000 | 1 | 1_Testes_ARID4B: |
| 1_Testes_ARID4B:                     | 375 in gene          | 1 | 26.000 | 1 | 1_Testes_ARID4B: |
| 1_Testes_ARID4B:                     | 384 in gene          | 1 | 29.000 | 1 | 1_Testes_ARID4B: |
| 1_Testes_ARID4B:                     | -703 upstream        | 1 | 29.000 | 1 | 1_Testes_ARID4B: |
| 1_Testes_ARID4B: 1006, 2094          | in gene, in gene     | 1 | 19.500 | 2 | 1_Testes_ARID4B: |
| 1_Testes_ARID4B:                     | -514 upstream        | 1 | 27.000 | 1 | 1_Testes_ARID4B: |
| 1_Testes_ARID4B:                     | 475 in gene          | 1 | 27.000 | 1 | 1_Testes_ARID4B: |
| 1_Testes_ARID4B:                     | -8205 upstream       | 1 | 31.000 | 1 | 1_Testes_ARID4B: |
| 1_Testes_ARID4B:                     | -4321 upstream       | 1 | 31.000 | 1 | 1_Testes_ARID4B: |
| 1_Testes_ARID4B:                     | 319 in gene          | 1 | 25.000 | 1 | 1_Testes_ARID4B: |

|                                          |                          |   |        |   |                  |
|------------------------------------------|--------------------------|---|--------|---|------------------|
| 1_Testes_ARID4B:                         | -637 upstream            | 1 | 31.000 | 1 | 1_Testes_ARID4B: |
| 1_Testes_ARID4B:                         | 527 in gene              | 1 | 31.000 | 1 | 1_Testes_ARID4B: |
| 1_Testes_ARID4B:                         | 166 in gene              | 1 | 32.000 | 1 | 1_Testes_ARID4B: |
| 1_Testes_ARID4B:                         | 136 in gene              | 1 | 18.000 | 1 | 1_Testes_ARID4B: |
| 1_Testes_ARID4B:                         | 756 in gene              | 1 | 30.000 | 1 | 1_Testes_ARID4B: |
| 1_Testes_ARID4B: 187, -757               | in gene, upstream        | 1 | 22.500 | 2 | 1_Testes_ARID4B: |
| 1_Testes_ARID4B: -242, 702               | upstream, in gene        | 1 | 22.500 | 2 | 1_Testes_ARID4B: |
| 1_Testes_ARID4B:                         | 166 in gene              | 1 | 26.000 | 1 | 1_Testes_ARID4B: |
| 1_Testes_ARID4B:                         | -137 upstream            | 1 | 26.000 | 1 | 1_Testes_ARID4B: |
| 1_Testes_ARID4B:                         | 137 in gene              | 1 | 29.000 | 1 | 1_Testes_ARID4B: |
| 1_Testes_ARID4B:                         | 512 in gene              | 1 | 18.000 | 1 | 1_Testes_ARID4B: |
| 1_Testes_ARID4B:                         | 255 in gene              | 1 | 24.000 | 1 | 1_Testes_ARID4B: |
| 1_Testes_ARID4B:                         | 109 in gene              | 1 | 25.000 | 1 | 1_Testes_ARID4B: |
| 1_Testes_ARID4B: 34597, 261              | downstream, in gene      | 1 | 29.000 | 2 | 1_Testes_ARID4B: |
| 1_Testes_ARID4B:                         | 348 in gene              | 1 | 20.000 | 1 | 1_Testes_ARID4B: |
| 1_Testes_ARID4B:                         | 352 in gene              | 1 | 34.000 | 1 | 1_Testes_ARID4B: |
| 1_Testes_ARID4B:                         | 362 in gene              | 1 | 24.000 | 1 | 1_Testes_ARID4B: |
| 1_Testes_ARID4B:                         | 142 in gene              | 1 | 26.000 | 1 | 1_Testes_ARID4B: |
| 1_Testes_ARID4B:                         | -3570 upstream           | 1 | 26.000 | 1 | 1_Testes_ARID4B: |
| 1_Testes_ARID4B:                         | -393 upstream            | 1 | 26.000 | 1 | 1_Testes_ARID4B: |
| 1_Testes_ARID4B:                         | 424 in gene              | 1 | 21.000 | 1 | 1_Testes_ARID4B: |
| 1_Testes_ARID4B:                         | 193 in gene              | 1 | 29.000 | 1 | 1_Testes_ARID4B: |
| 1_Testes_ARID4B: 32094, 238              | downstream, in gene      | 1 | 27.000 | 2 | 1_Testes_ARID4B: |
| 1_Testes_ARID4B:                         | -340 upstream            | 1 | 25.000 | 1 | 1_Testes_ARID4B: |
| 1_Testes_ARID4B: 51977, 73               | in gene, in gene         | 1 | 28.500 | 2 | 1_Testes_ARID4B: |
| 1_Testes_ARID4B:                         | -65 upstream             | 1 | 20.000 | 1 | 1_Testes_ARID4B: |
| 1_Testes_ARID4B:                         | 183 in gene              | 1 | 28.000 | 1 | 1_Testes_ARID4B: |
| 1_Testes_ARID4B:                         | -409 upstream            | 1 | 28.000 | 1 | 1_Testes_ARID4B: |
| 1_Testes_ARID4B:                         | 537 in gene              | 1 | 44.000 | 1 | 1_Testes_ARID4B: |
| 1_Testes_ARID4B:                         | -144 upstream            | 1 | 17.000 | 1 | 1_Testes_ARID4B: |
| 1_Testes_ARID4B:                         | 483 in gene              | 1 | 31.000 | 1 | 1_Testes_ARID4B: |
| 1_Testes_ARID4B:                         | -82 upstream             | 1 | 25.000 | 1 | 1_Testes_ARID4B: |
| 1_Testes_ARID4B:                         | -96 upstream             | 1 | 25.000 | 1 | 1_Testes_ARID4B: |
| 1_Testes_ARID4B:                         | 126 in gene              | 1 | 25.000 | 1 | 1_Testes_ARID4B: |
| 1_Testes_ARID4B:                         | -88 upstream             | 1 | 23.000 | 1 | 1_Testes_ARID4B: |
| 1_Testes_ARID4B:                         | -402 upstream            | 1 | 23.000 | 1 | 1_Testes_ARID4B: |
| 1_Testes_ARID4B:                         | -194 upstream            | 1 | 16.000 | 1 | 1_Testes_ARID4B: |
| 1_Testes_ARID4B: 11021, 9677, -2771, -10 | in gene, in gene, upstre | 1 | 20.250 | 4 | 1_Testes_ARID4B: |
| 1_Testes_ARID4B: -529, 815, 13263        | upstream, in gene, dow   | 1 | 21.000 | 3 | 1_Testes_ARID4B: |
| 1_Testes_ARID4B: 7937, 353               | downstream, in gene      | 1 | 18.500 | 2 | 1_Testes_ARID4B: |
| 1_Testes_ARID4B: -7141, 10299            | upstream, in gene        | 1 | 22.000 | 2 | 1_Testes_ARID4B: |
| 1_Testes_ARID4B:                         | -721 upstream            | 1 | 26.000 | 1 | 1_Testes_ARID4B: |
| 1_Testes_ARID4B:                         | 318 in gene              | 1 | 25.000 | 1 | 1_Testes_ARID4B: |
| 1_Testes_ARID4B:                         | -270 upstream            | 1 | 21.000 | 1 | 1_Testes_ARID4B: |
| 1_Testes_ARID4B: -4826, 13174, 17318     | upstream, downstream     | 1 | 23.333 | 3 | 1_Testes_ARID4B: |
| 1_Testes_ARID4B: 539, -3605              | in gene, upstream        | 1 | 24.500 | 2 | 1_Testes_ARID4B: |
| 1_Testes_ARID4B: -8830, -4686            | upstream, upstream       | 1 | 24.500 | 2 | 1_Testes_ARID4B: |

|                                   |                        |   |        |   |                  |
|-----------------------------------|------------------------|---|--------|---|------------------|
| 1_Testes_ARID4B:                  | 191 in gene            | 1 | 26.000 | 1 | 1_Testes_ARID4B: |
| 1_Testes_ARID4B:                  | 233 in gene            | 1 | 29.000 | 1 | 1_Testes_ARID4B: |
| 1_Testes_ARID4B:                  | -431 upstream          | 1 | 29.000 | 1 | 1_Testes_ARID4B: |
| 1_Testes_ARID4B:                  | 169 in gene            | 1 | 21.000 | 1 | 1_Testes_ARID4B: |
| 1_Testes_ARID4B:                  | -334 upstream          | 1 | 21.000 | 1 | 1_Testes_ARID4B: |
| 1_Testes_ARID4B: -631, -1495      | upstream, upstream     | 1 | 25.500 | 2 | 1_Testes_ARID4B: |
| 1_Testes_ARID4B: -522, 342        | upstream, in gene      | 1 | 25.500 | 2 | 1_Testes_ARID4B: |
| 1_Testes_ARID4B:                  | 576 in gene            | 1 | 27.000 | 1 | 1_Testes_ARID4B: |
| 1_Testes_ARID4B:                  | 390 in gene            | 1 | 26.000 | 1 | 1_Testes_ARID4B: |
| 1_Testes_ARID4B:                  | 16081 downstream       | 1 | 26.000 | 1 | 1_Testes_ARID4B: |
| 1_Testes_ARID4B:                  | 230 in gene            | 1 | 38.000 | 1 | 1_Testes_ARID4B: |
| 1_Testes_ARID4B:                  | 12714 downstream       | 1 | 32.000 | 1 | 1_Testes_ARID4B: |
| 1_Testes_ARID4B:                  | -38 upstream           | 1 | 32.000 | 1 | 1_Testes_ARID4B: |
| 1_Testes_ARID4B: -897, 78527      | upstream, downstream   | 1 | 29.000 | 2 | 1_Testes_ARID4B: |
| 1_Testes_ARID4B:                  | 181 in gene            | 1 | 26.000 | 1 | 1_Testes_ARID4B: |
| 1_Testes_ARID4B:                  | 458 in gene            | 1 | 36.000 | 1 | 1_Testes_ARID4B: |
| 1_Testes_ARID4B: -202, -7498      | upstream, upstream     | 1 | 28.500 | 2 | 1_Testes_ARID4B: |
| 1_Testes_ARID4B: 177, 7473        | in gene, downstream    | 1 | 28.500 | 2 | 1_Testes_ARID4B: |
| 1_Testes_ARID4B: -6982, 314, 9882 | upstream, in gene, dow | 1 | 28.333 | 3 | 1_Testes_ARID4B: |
| 1_Testes_ARID4B: 9506, -62        | downstream, upstream   | 1 | 28.500 | 2 | 1_Testes_ARID4B: |
| 1_Testes_ARID4B: -9554, 14        | upstream, in gene      | 1 | 28.500 | 2 | 1_Testes_ARID4B: |
| 1_Testes_ARID4B:                  | -9108 upstream         | 1 | 28.000 | 1 | 1_Testes_ARID4B: |
| 1_Testes_ARID4B: 186, -6886       | in gene, upstream      | 1 | 35.500 | 2 | 1_Testes_ARID4B: |
| 1_Testes_ARID4B: -6881, 191       | upstream, in gene      | 1 | 35.500 | 2 | 1_Testes_ARID4B: |
| 1_Testes_ARID4B: 190, 7486        | in gene, downstream    | 1 | 21.500 | 2 | 1_Testes_ARID4B: |
| 1_Testes_ARID4B: -7019, 277       | upstream, in gene      | 1 | 21.500 | 2 | 1_Testes_ARID4B: |
| 1_Testes_ARID4B:                  | -6985 upstream         | 1 | 23.000 | 1 | 1_Testes_ARID4B: |
| 1_Testes_ARID4B:                  | -390 upstream          | 1 | 23.000 | 1 | 1_Testes_ARID4B: |
| 1_Testes_ARID4B:                  | 118 in gene            | 1 | 23.000 | 1 | 1_Testes_ARID4B: |
| 1_Testes_ARID4B:                  | 286 in gene            | 1 | 24.000 | 1 | 1_Testes_ARID4B: |
| 1_Testes_ARID4B:                  | 36 in gene             | 1 | 28.000 | 1 | 1_Testes_ARID4B: |
| 1_Testes_ARID4B: 13380, -8044     | downstream, upstream   | 1 | 29.500 | 2 | 1_Testes_ARID4B: |
| 1_Testes_ARID4B:                  | -4489 upstream         | 1 | 31.000 | 1 | 1_Testes_ARID4B: |
| 1_Testes_ARID4B:                  | 739 in gene            | 1 | 31.000 | 1 | 1_Testes_ARID4B: |
| 1_Testes_ARID4B: 29086, 158       | downstream, in gene    | 1 | 31.000 | 2 | 1_Testes_ARID4B: |
| 1_Testes_ARID4B:                  | 9390 downstream        | 1 | 31.000 | 1 | 1_Testes_ARID4B: |
| 1_Testes_ARID4B:                  | 1058 in gene           | 1 | 21.000 | 1 | 1_Testes_ARID4B: |
| 1_Testes_ARID4B:                  | 1754 in gene           | 1 | 19.000 | 1 | 1_Testes_ARID4B: |
| 1_Testes_ARID4B:                  | 300 in gene            | 1 | 39.000 | 1 | 1_Testes_ARID4B: |
| 1_Testes_ARID4B:                  | 10294 downstream       | 1 | 39.000 | 1 | 1_Testes_ARID4B: |
| 1_Testes_ARID4B: 163, 36275       | in gene, downstream    | 1 | 29.500 | 2 | 1_Testes_ARID4B: |
| 1_Testes_ARID4B:                  | 302 in gene            | 1 | 29.000 | 1 | 1_Testes_ARID4B: |
| 1_Testes_ARID4B:                  | 7739 downstream        | 1 | 29.000 | 1 | 1_Testes_ARID4B: |
| 1_Testes_ARID4B: 28845, -8691     | downstream, upstream   | 1 | 26.500 | 2 | 1_Testes_ARID4B: |
| 1_Testes_ARID4B:                  | -28 upstream           | 1 | 24.000 | 1 | 1_Testes_ARID4B: |
| 1_Testes_ARID4B:                  | -4 upstream            | 1 | 24.000 | 1 | 1_Testes_ARID4B: |
| 1_Testes_ARID4B:                  | 19844 downstream       | 1 | 24.000 | 1 | 1_Testes_ARID4B: |

|                                    |                         |   |        |   |                  |
|------------------------------------|-------------------------|---|--------|---|------------------|
| 1_Testes_ARID4B:                   | 96 in gene              | 1 | 34.000 | 1 | 1_Testes_ARID4B: |
| 1_Testes_ARID4B:                   | -576 upstream           | 1 | 34.000 | 1 | 1_Testes_ARID4B: |
| 1_Testes_ARID4B:                   | 142 in gene             | 1 | 40.000 | 1 | 1_Testes_ARID4B: |
| 1_Testes_ARID4B:                   | 114 in gene             | 1 | 33.000 | 1 | 1_Testes_ARID4B: |
| 1_Testes_ARID4B: 727, 11767        | in gene, downstream     | 1 | 21.000 | 2 | 1_Testes_ARID4B: |
| 1_Testes_ARID4B: 11060, 20         | downstream, in gene     | 1 | 21.000 | 2 | 1_Testes_ARID4B: |
| 1_Testes_ARID4B: 8801, -2239       | downstream, upstream    | 1 | 21.000 | 2 | 1_Testes_ARID4B: |
| 1_Testes_ARID4B: 10137, -903       | downstream, upstream    | 1 | 21.000 | 2 | 1_Testes_ARID4B: |
| 1_Testes_ARID4B:                   | -148 upstream           | 1 | 25.000 | 1 | 1_Testes_ARID4B: |
| 1_Testes_ARID4B:                   | -6370 upstream          | 1 | 25.000 | 1 | 1_Testes_ARID4B: |
| 1_Testes_ARID4B:                   | -8035 upstream          | 1 | 61.000 | 1 | 1_Testes_ARID4B: |
| 1_Testes_ARID4B:                   | -206 upstream           | 1 | 61.000 | 1 | 1_Testes_ARID4B: |
| 1_Testes_ARID4B:                   | 41 in gene              | 1 | 61.000 | 1 | 1_Testes_ARID4B: |
| 1_Testes_ARID4B:                   | 5682 downstream         | 1 | 61.000 | 1 | 1_Testes_ARID4B: |
| 1_Testes_ARID4B:                   | -5573 upstream          | 1 | 61.000 | 1 | 1_Testes_ARID4B: |
| 1_Testes_ARID4B: 22663, 615        | downstream, in gene     | 1 | 42.000 | 2 | 1_Testes_ARID4B: |
| 1_Testes_ARID4B:                   | -1173 upstream          | 1 | 23.000 | 1 | 1_Testes_ARID4B: |
| 1_Testes_ARID4B:                   | 36675 downstream        | 1 | 24.000 | 1 | 1_Testes_ARID4B: |
| 1_Testes_ARID4B:                   | 165 in gene             | 1 | 24.000 | 1 | 1_Testes_ARID4B: |
| 1_Testes_ARID4B:                   | 937 in gene             | 1 | 39.000 | 1 | 1_Testes_ARID4B: |
| 1_Testes_ARID4B:                   | 473 in gene             | 1 | 33.000 | 1 | 1_Testes_ARID4B: |
| 1_Testes_ARID4B:                   | -75 upstream            | 1 | 29.000 | 1 | 1_Testes_ARID4B: |
| 1_Testes_ARID4B: -561, 623         | upstream, in gene       | 1 | 25.000 | 2 | 1_Testes_ARID4B: |
| 1_Testes_ARID4B: 199, 1959         | in gene, in gene        | 1 | 23.000 | 2 | 1_Testes_ARID4B: |
| 1_Testes_ARID4B:                   | -1868 upstream          | 1 | 25.000 | 1 | 1_Testes_ARID4B: |
| 1_Testes_ARID4B:                   | 126 in gene             | 1 | 25.000 | 1 | 1_Testes_ARID4B: |
| 1_Testes_ARID4B:                   | 16741 downstream        | 1 | 22.000 | 1 | 1_Testes_ARID4B: |
| 1_Testes_ARID4B:                   | 465 in gene             | 1 | 22.000 | 1 | 1_Testes_ARID4B: |
| 1_Testes_ARID4B:                   | 261 in gene             | 1 | 18.000 | 1 | 1_Testes_ARID4B: |
| 1_Testes_ARID4B:                   | -40 upstream            | 1 | 42.000 | 1 | 1_Testes_ARID4B: |
| 1_Testes_ARID4B:                   | -6 upstream             | 1 | 42.000 | 1 | 1_Testes_ARID4B: |
| 1_Testes_ARID4B:                   | -1160 upstream          | 1 | 22.000 | 1 | 1_Testes_ARID4B: |
| 1_Testes_ARID4B: 186, -5425        | in gene, upstream       | 1 | 21.500 | 2 | 1_Testes_ARID4B: |
| 1_Testes_ARID4B: -5383, 228        | upstream, in gene       | 1 | 21.500 | 2 | 1_Testes_ARID4B: |
| 1_Testes_ARID4B:                   | -4472 upstream          | 1 | 17.000 | 1 | 1_Testes_ARID4B: |
| 1_Testes_ARID4B:                   | 481 in gene             | 1 | 17.000 | 1 | 1_Testes_ARID4B: |
| 1_Testes_ARID4B:                   | 236 in gene             | 1 | 21.000 | 1 | 1_Testes_ARID4B: |
| 1_Testes_ARID4B:                   | 473 in gene             | 1 | 19.000 | 1 | 1_Testes_ARID4B: |
| 1_Testes_ARID4B: -182, 20490       | upstream, downstream    | 1 | 29.000 | 2 | 1_Testes_ARID4B: |
| 1_Testes_ARID4B: 264, 45768        | in gene, downstream     | 1 | 36.500 | 2 | 1_Testes_ARID4B: |
| 1_Testes_ARID4B: 79, 30415         | in gene, downstream     | 1 | 32.500 | 2 | 1_Testes_ARID4B: |
| 1_Testes_ARID4B:                   | 264 in gene             | 1 | 31.000 | 1 | 1_Testes_ARID4B: |
| 1_Testes_ARID4B:                   | 207 in gene             | 1 | 37.000 | 1 | 1_Testes_ARID4B: |
| 1_Testes_ARID4B: 4788, 5332, 15764 | in gene, in gene, downs | 1 | 25.333 | 3 | 1_Testes_ARID4B: |
| 1_Testes_ARID4B:                   | -1006 upstream          | 1 | 30.000 | 1 | 1_Testes_ARID4B: |
| 1_Testes_ARID4B:                   | -129 upstream           | 1 | 27.000 | 1 | 1_Testes_ARID4B: |
| 1_Testes_ARID4B:                   | -9 upstream             | 1 | 27.000 | 1 | 1_Testes_ARID4B: |

|                                    |        |                        |   |        |   |                  |
|------------------------------------|--------|------------------------|---|--------|---|------------------|
| 1_Testes_ARID4B:                   | 19919  | downstream             | 1 | 30.000 | 1 | 1_Testes_ARID4B: |
| 1_Testes_ARID4B:                   | -94    | upstream               | 1 | 30.000 | 1 | 1_Testes_ARID4B: |
| 1_Testes_ARID4B:                   | 15     | in gene                | 1 | 30.000 | 1 | 1_Testes_ARID4B: |
| 1_Testes_ARID4B:                   | 100    | in gene                | 1 | 30.000 | 1 | 1_Testes_ARID4B: |
| 1_Testes_ARID4B:                   | -402   | upstream               | 1 | 30.000 | 1 | 1_Testes_ARID4B: |
| 1_Testes_ARID4B: 1175, 183         |        | in gene, in gene       | 1 | 40.000 | 2 | 1_Testes_ARID4B: |
| 1_Testes_ARID4B:                   | 11534  | in gene                | 1 | 24.000 | 1 | 1_Testes_ARID4B: |
| 1_Testes_ARID4B:                   | 4691   | downstream             | 1 | 21.000 | 1 | 1_Testes_ARID4B: |
| 1_Testes_ARID4B:                   | -8858  | upstream               | 1 | 21.000 | 1 | 1_Testes_ARID4B: |
| 1_Testes_ARID4B:                   | -1156  | upstream               | 1 | 19.000 | 1 | 1_Testes_ARID4B: |
| 1_Testes_ARID4B: 39, 14679         |        | in gene, downstream    | 1 | 25.500 | 2 | 1_Testes_ARID4B: |
| 1_Testes_ARID4B: 14878, 238        |        | downstream, in gene    | 1 | 25.500 | 2 | 1_Testes_ARID4B: |
| 1_Testes_ARID4B:                   | 14261  | downstream             | 1 | 28.000 | 1 | 1_Testes_ARID4B: |
| 1_Testes_ARID4B: 200, -10552       |        | in gene, upstream      | 1 | 28.000 | 2 | 1_Testes_ARID4B: |
| 1_Testes_ARID4B: 10483, -269       |        | downstream, upstream   | 1 | 28.000 | 2 | 1_Testes_ARID4B: |
| 1_Testes_ARID4B: -10508, 244       |        | upstream, in gene      | 1 | 28.000 | 2 | 1_Testes_ARID4B: |
| 1_Testes_ARID4B:                   | -195   | upstream               | 1 | 25.000 | 1 | 1_Testes_ARID4B: |
| 1_Testes_ARID4B: 143505, 156017    |        | in gene, downstream    | 1 | 19.500 | 2 | 1_Testes_ARID4B: |
| 1_Testes_ARID4B:                   | 162    | in gene                | 1 | 20.000 | 1 | 1_Testes_ARID4B: |
| 1_Testes_ARID4B:                   | -277   | upstream               | 1 | 22.000 | 1 | 1_Testes_ARID4B: |
| 1_Testes_ARID4B:                   | 18015  | downstream             | 1 | 21.000 | 1 | 1_Testes_ARID4B: |
| 1_Testes_ARID4B:                   | 196    | in gene                | 1 | 21.000 | 1 | 1_Testes_ARID4B: |
| 1_Testes_ARID4B:                   | 217    | in gene                | 1 | 23.000 | 1 | 1_Testes_ARID4B: |
| 1_Testes_ARID4B:                   | 308    | in gene                | 1 | 25.000 | 1 | 1_Testes_ARID4B: |
| 1_Testes_ARID4B: 184, -9917        |        | in gene, upstream      | 1 | 27.500 | 2 | 1_Testes_ARID4B: |
| 1_Testes_ARID4B: -9890, 211, 18798 |        | upstream, in gene, dow | 1 | 27.000 | 3 | 1_Testes_ARID4B: |
| 1_Testes_ARID4B:                   | 107    | in gene                | 1 | 26.000 | 1 | 1_Testes_ARID4B: |
| 1_Testes_ARID4B:                   | 5931   | downstream             | 1 | 26.000 | 1 | 1_Testes_ARID4B: |
| 1_Testes_ARID4B:                   | 289    | in gene                | 1 | 32.000 | 1 | 1_Testes_ARID4B: |
| 1_Testes_ARID4B:                   | 19998  | downstream             | 1 | 22.000 | 1 | 1_Testes_ARID4B: |
| 1_Testes_ARID4B:                   | 7779   | in gene                | 1 | 22.000 | 1 | 1_Testes_ARID4B: |
| 1_Testes_ARID4B:                   | 36333  | downstream             | 1 | 17.000 | 1 | 1_Testes_ARID4B: |
| 1_Testes_ARID4B: 11247, 207        |        | in gene, in gene       | 1 | 18.500 | 2 | 1_Testes_ARID4B: |
| 1_Testes_ARID4B: 3088, 288         |        | in gene, in gene       | 1 | 22.500 | 2 | 1_Testes_ARID4B: |
| 1_Testes_ARID4B: 3192, 392         |        | downstream, downstre   | 1 | 22.500 | 2 | 1_Testes_ARID4B: |
| 1_Testes_ARID4B: 3276, 476         |        | downstream, downstre   | 1 | 22.500 | 2 | 1_Testes_ARID4B: |
| 1_Testes_ARID4B: -8559, 36353      |        | upstream, downstream   | 1 | 28.500 | 2 | 1_Testes_ARID4B: |
| 1_Testes_ARID4B:                   | 174    | in gene                | 1 | 27.000 | 1 | 1_Testes_ARID4B: |
| 1_Testes_ARID4B:                   | 17975  | downstream             | 1 | 27.000 | 1 | 1_Testes_ARID4B: |
| 1_Testes_ARID4B:                   | 869    | in gene                | 1 | 21.000 | 1 | 1_Testes_ARID4B: |
| 1_Testes_ARID4B:                   | 250    | in gene                | 1 | 33.000 | 1 | 1_Testes_ARID4B: |
| 1_Testes_ARID4B:                   | -633   | upstream               | 1 | 50.000 | 1 | 1_Testes_ARID4B: |
| 1_Testes_ARID4B:                   | 176    | in gene                | 1 | 50.000 | 1 | 1_Testes_ARID4B: |
| 1_Testes_ARID4B:                   | -1413  | upstream               | 1 | 50.000 | 1 | 1_Testes_ARID4B: |
| 1_Testes_ARID4B: 20168, 136        |        | downstream, in gene    | 1 | 39.500 | 2 | 1_Testes_ARID4B: |
| 1_Testes_ARID4B:                   | 105284 | downstream             | 1 | 29.000 | 1 | 1_Testes_ARID4B: |
| 1_Testes_ARID4B:                   | 412    | in gene                | 1 | 23.000 | 1 | 1_Testes_ARID4B: |

|                                 |                      |   |        |   |                  |
|---------------------------------|----------------------|---|--------|---|------------------|
| 1_Testes_ARID4B:                | 196 in gene          | 1 | 28.000 | 1 | 1_Testes_ARID4B: |
| 1_Testes_ARID4B: 938, 234       | in gene, in gene     | 1 | 24.500 | 2 | 1_Testes_ARID4B: |
| 1_Testes_ARID4B: 420, -636      | in gene, upstream    | 1 | 27.000 | 2 | 1_Testes_ARID4B: |
| 1_Testes_ARID4B:                | 155 in gene          | 1 | 26.000 | 1 | 1_Testes_ARID4B: |
| 1_Testes_ARID4B:                | 146 in gene          | 1 | 33.000 | 1 | 1_Testes_ARID4B: |
| 1_Testes_ARID4B:                | -3620 upstream       | 1 | 33.000 | 1 | 1_Testes_ARID4B: |
| 1_Testes_ARID4B:                | 704 in gene          | 1 | 35.000 | 1 | 1_Testes_ARID4B: |
| 1_Testes_ARID4B: 103430, 162065 | in gene, in gene     | 1 | 22.500 | 2 | 1_Testes_ARID4B: |
| 1_Testes_ARID4B:                | 488 in gene          | 1 | 25.000 | 1 | 1_Testes_ARID4B: |
| 1_Testes_ARID4B:                | 140 in gene          | 1 | 27.000 | 1 | 1_Testes_ARID4B: |
| 1_Testes_ARID4B:                | -321 upstream        | 1 | 27.000 | 1 | 1_Testes_ARID4B: |
| 1_Testes_ARID4B:                | -9 upstream          | 1 | 24.000 | 1 | 1_Testes_ARID4B: |
| 1_Testes_ARID4B:                | 8007 downstream      | 1 | 24.000 | 1 | 1_Testes_ARID4B: |
| 1_Testes_ARID4B: 20209, -9082   | downstream, upstream | 1 | 20.500 | 2 | 1_Testes_ARID4B: |
| 1_Testes_ARID4B:                | 8918 in gene         | 1 | 17.000 | 1 | 1_Testes_ARID4B: |
| 1_Testes_ARID4B:                | 296 in gene          | 1 | 24.000 | 1 | 1_Testes_ARID4B: |
| 1_Testes_ARID4B:                | 207 in gene          | 1 | 20.000 | 1 | 1_Testes_ARID4B: |
| 1_Testes_ARID4B:                | 4078 in gene         | 1 | 39.000 | 1 | 1_Testes_ARID4B: |
| 1_Testes_ARID4B: 381, -5507     | in gene, upstream    | 1 | 22.000 | 2 | 1_Testes_ARID4B: |
| 1_Testes_ARID4B: -5900, -12     | upstream, upstream   | 1 | 22.000 | 2 | 1_Testes_ARID4B: |
| 1_Testes_ARID4B: 6747, 9883     | downstream, downstre | 1 | 29.500 | 2 | 1_Testes_ARID4B: |
| 1_Testes_ARID4B: 75, -3061      | in gene, upstream    | 1 | 29.500 | 2 | 1_Testes_ARID4B: |
| 1_Testes_ARID4B: -3083, 53      | upstream, in gene    | 1 | 29.500 | 2 | 1_Testes_ARID4B: |
| 1_Testes_ARID4B: 57214, -34     | downstream, upstream | 1 | 33.500 | 2 | 1_Testes_ARID4B: |
| 1_Testes_ARID4B: 125290, 122    | downstream, in gene  | 1 | 29.000 | 2 | 1_Testes_ARID4B: |
| 1_Testes_ARID4B: 35730, 98      | downstream, in gene  | 1 | 23.500 | 2 | 1_Testes_ARID4B: |
| 1_Testes_ARID4B:                | 99 in gene           | 1 | 28.000 | 1 | 1_Testes_ARID4B: |
| 1_Testes_ARID4B:                | 1074 in gene         | 1 | 26.000 | 1 | 1_Testes_ARID4B: |
| 1_Testes_ARID4B:                | 142 in gene          | 1 | 18.000 | 1 | 1_Testes_ARID4B: |
| 1_Testes_ARID4B:                | 419 in gene          | 1 | 18.000 | 1 | 1_Testes_ARID4B: |
| 1_Testes_ARID4B:                | 101 in gene          | 1 | 23.000 | 1 | 1_Testes_ARID4B: |
| 1_Testes_ARID4B:                | -234 upstream        | 1 | 23.000 | 1 | 1_Testes_ARID4B: |
| 1_Testes_ARID4B:                | 1399 in gene         | 1 | 29.000 | 1 | 1_Testes_ARID4B: |
| 1_Testes_ARID4B:                | 379 in gene          | 1 | 23.000 | 1 | 1_Testes_ARID4B: |
| 1_Testes_ARID4B:                | 442 in gene          | 1 | 32.000 | 1 | 1_Testes_ARID4B: |
| 1_Testes_ARID4B:                | -546 upstream        | 1 | 32.000 | 1 | 1_Testes_ARID4B: |
| 1_Testes_ARID4B: 252150, 198    | downstream, in gene  | 1 | 28.000 | 2 | 1_Testes_ARID4B: |
| 1_Testes_ARID4B:                | -379 upstream        | 1 | 31.000 | 1 | 1_Testes_ARID4B: |
| 1_Testes_ARID4B:                | 404 in gene          | 1 | 34.000 | 1 | 1_Testes_ARID4B: |
| 1_Testes_ARID4B:                | -1229 upstream       | 1 | 24.000 | 1 | 1_Testes_ARID4B: |
| 1_Testes_ARID4B:                | 332 in gene          | 1 | 24.000 | 1 | 1_Testes_ARID4B: |
| 1_Testes_ARID4B: 9091, 307      | in gene, in gene     | 1 | 24.500 | 2 | 1_Testes_ARID4B: |
| 1_Testes_ARID4B:                | 58058 downstream     | 1 | 23.000 | 1 | 1_Testes_ARID4B: |
| 1_Testes_ARID4B:                | 86 in gene           | 1 | 26.000 | 1 | 1_Testes_ARID4B: |
| 1_Testes_ARID4B:                | 738 in gene          | 1 | 26.000 | 1 | 1_Testes_ARID4B: |
| 1_Testes_ARID4B:                | 222 in gene          | 1 | 19.000 | 1 | 1_Testes_ARID4B: |
| 1_Testes_ARID4B:                | 124 in gene          | 1 | 28.000 | 1 | 1_Testes_ARID4B: |

|                             |                   |   |        |   |                  |
|-----------------------------|-------------------|---|--------|---|------------------|
| 1_Testes_ARID4B:            | 622 in gene       | 1 | 46.000 | 1 | 1_Testes_ARID4B: |
| 1_Testes_ARID4B:            | 132 in gene       | 1 | 24.000 | 1 | 1_Testes_ARID4B: |
| 1_Testes_ARID4B:            | 270 in gene       | 1 | 25.000 | 1 | 1_Testes_ARID4B: |
| 1_Testes_ARID4B:            | 332 in gene       | 1 | 17.000 | 1 | 1_Testes_ARID4B: |
| 1_Testes_ARID4B:            | -988 upstream     | 1 | 26.000 | 1 | 1_Testes_ARID4B: |
| 1_Testes_ARID4B:            | 416 in gene       | 1 | 26.000 | 1 | 1_Testes_ARID4B: |
| 1_Testes_ARID4B: 82084, 516 | in gene, in gene  | 1 | 19.000 | 2 | 1_Testes_ARID4B: |
| 1_Testes_ARID4B:            | 12463 downstream  | 1 | 18.000 | 1 | 1_Testes_ARID4B: |
| 1_Testes_ARID4B:            | 14806 in gene     | 1 | 19.000 | 1 | 1_Testes_ARID4B: |
| 1_Testes_ARID4B:            | 93970 downstream  | 1 | 21.000 | 1 | 1_Testes_ARID4B: |
| 1_Testes_ARID4B:            | 1211 in gene      | 1 | 21.000 | 1 | 1_Testes_ARID4B: |
| 1_Testes_ARID4B:            | -478 upstream     | 1 | 29.000 | 1 | 1_Testes_ARID4B: |
| 1_Testes_ARID4B:            | 153 in gene       | 1 | 17.000 | 1 | 1_Testes_ARID4B: |
| 1_Testes_ARID4B:            | 909 in gene       | 1 | 26.000 | 1 | 1_Testes_ARID4B: |
| 1_Testes_ARID4B:            | 395 in gene       | 1 | 33.000 | 1 | 1_Testes_ARID4B: |
| 1_Testes_ARID4B:            | 227 in gene       | 1 | 22.000 | 1 | 1_Testes_ARID4B: |
| 1_Testes_ARID4B:            | 105 in gene       | 1 | 30.000 | 1 | 1_Testes_ARID4B: |
| 1_Testes_ARID4B:            | -10274 upstream   | 1 | 25.000 | 1 | 1_Testes_ARID4B: |
| 1_Testes_ARID4B:            | -208 upstream     | 1 | 25.000 | 1 | 1_Testes_ARID4B: |
| 1_Testes_ARID4B:            | 13399 downstream  | 1 | 18.000 | 1 | 1_Testes_ARID4B: |
| 1_Testes_ARID4B:            | 390 in gene       | 1 | 21.000 | 1 | 1_Testes_ARID4B: |
| 1_Testes_ARID4B:            | 23652 downstream  | 1 | 21.000 | 1 | 1_Testes_ARID4B: |
| 1_Testes_ARID4B:            | 11969 downstream  | 1 | 38.000 | 1 | 1_Testes_ARID4B: |
| 1_Testes_ARID4B:            | 402 in gene       | 1 | 38.000 | 1 | 1_Testes_ARID4B: |
| 1_Testes_ARID4B:            | 267 in gene       | 1 | 31.000 | 1 | 1_Testes_ARID4B: |
| 1_Testes_ARID4B:            | 456 in gene       | 1 | 18.000 | 1 | 1_Testes_ARID4B: |
| 1_Testes_ARID4B:            | -490 upstream     | 1 | 25.000 | 1 | 1_Testes_ARID4B: |
| 1_Testes_ARID4B:            | 352 in gene       | 1 | 25.000 | 1 | 1_Testes_ARID4B: |
| 1_Testes_ARID4B:            | 230 in gene       | 1 | 31.000 | 1 | 1_Testes_ARID4B: |
| 1_Testes_ARID4B:            | -161 upstream     | 1 | 25.000 | 1 | 1_Testes_ARID4B: |
| 1_Testes_ARID4B:            | 54 in gene        | 1 | 26.000 | 1 | 1_Testes_ARID4B: |
| 1_Testes_ARID4B:            | 213 in gene       | 1 | 19.000 | 1 | 1_Testes_ARID4B: |
| 1_Testes_ARID4B:            | 104 in gene       | 1 | 31.000 | 1 | 1_Testes_ARID4B: |
| 1_Testes_ARID4B:            | 459 in gene       | 1 | 21.000 | 1 | 1_Testes_ARID4B: |
| 1_Testes_ARID4B:            | 149 in gene       | 1 | 28.000 | 1 | 1_Testes_ARID4B: |
| 1_Testes_ARID4B: 1278, 254  | in gene, in gene  | 1 | 29.000 | 2 | 1_Testes_ARID4B: |
| 1_Testes_ARID4B: -264, 760  | upstream, in gene | 1 | 29.000 | 2 | 1_Testes_ARID4B: |
| 1_Testes_ARID4B:            | 399 in gene       | 1 | 24.000 | 1 | 1_Testes_ARID4B: |
| 1_Testes_ARID4B:            | 1610 in gene      | 1 | 19.000 | 1 | 1_Testes_ARID4B: |
| 1_Testes_ARID4B:            | 39056 downstream  | 1 | 19.000 | 1 | 1_Testes_ARID4B: |
| 1_Testes_ARID4B:            | -174 upstream     | 1 | 21.000 | 1 | 1_Testes_ARID4B: |
| 1_Testes_ARID4B:            | 18108 downstream  | 1 | 27.000 | 1 | 1_Testes_ARID4B: |
| 1_Testes_ARID4B:            | 190 in gene       | 1 | 27.000 | 1 | 1_Testes_ARID4B: |
| 1_Testes_ARID4B:            | 180 in gene       | 1 | 34.000 | 1 | 1_Testes_ARID4B: |
| 1_Testes_ARID4B: 379, -9285 | in gene, upstream | 1 | 20.500 | 2 | 1_Testes_ARID4B: |
| 1_Testes_ARID4B: -9270, 394 | upstream, in gene | 1 | 20.500 | 2 | 1_Testes_ARID4B: |
| 1_Testes_ARID4B:            | -6309 upstream    | 1 | 21.000 | 1 | 1_Testes_ARID4B: |

|                               |        |                      |   |        |   |                  |
|-------------------------------|--------|----------------------|---|--------|---|------------------|
| 1_Testes_ARID4B:              | 13146  | downstream           | 1 | 21.000 | 1 | 1_Testes_ARID4B: |
| 1_Testes_ARID4B: 813, 6285    |        | in gene, downstream  | 1 | 28.500 | 2 | 1_Testes_ARID4B: |
| 1_Testes_ARID4B: -5059, 413   |        | upstream, in gene    | 1 | 28.500 | 2 | 1_Testes_ARID4B: |
| 1_Testes_ARID4B:              | -7313  | upstream             | 1 | 36.000 | 1 | 1_Testes_ARID4B: |
| 1_Testes_ARID4B:              | -7326  | upstream             | 1 | 17.000 | 1 | 1_Testes_ARID4B: |
| 1_Testes_ARID4B: 11463, 34871 |        | in gene, in gene     | 1 | 18.000 | 2 | 1_Testes_ARID4B: |
| 1_Testes_ARID4B:              | 1478   | in gene              | 1 | 17.000 | 1 | 1_Testes_ARID4B: |
| 1_Testes_ARID4B:              | -2614  | upstream             | 1 | 17.000 | 1 | 1_Testes_ARID4B: |
| 1_Testes_ARID4B:              | 3636   | downstream           | 1 | 19.000 | 1 | 1_Testes_ARID4B: |
| 1_Testes_ARID4B:              | 60     | in gene              | 1 | 23.000 | 1 | 1_Testes_ARID4B: |
| 1_Testes_ARID4B:              | 108    | in gene              | 1 | 31.000 | 1 | 1_Testes_ARID4B: |
| 1_Testes_ARID4B:              | 549    | in gene              | 1 | 24.000 | 1 | 1_Testes_ARID4B: |
| 1_Testes_ARID4B:              | 289    | in gene              | 1 | 35.000 | 1 | 1_Testes_ARID4B: |
| 1_Testes_ARID4B:              | -383   | upstream             | 1 | 35.000 | 1 | 1_Testes_ARID4B: |
| 1_Testes_ARID4B:              | -9600  | upstream             | 1 | 24.000 | 1 | 1_Testes_ARID4B: |
| 1_Testes_ARID4B:              | 64     | in gene              | 1 | 24.000 | 1 | 1_Testes_ARID4B: |
| 1_Testes_ARID4B:              | 150    | in gene              | 1 | 24.000 | 1 | 1_Testes_ARID4B: |
| 1_Testes_ARID4B:              | 223    | in gene              | 1 | 44.000 | 1 | 1_Testes_ARID4B: |
| 1_Testes_ARID4B:              | 310    | in gene              | 1 | 29.000 | 1 | 1_Testes_ARID4B: |
| 1_Testes_ARID4B:              | 133    | in gene              | 1 | 20.000 | 1 | 1_Testes_ARID4B: |
| 1_Testes_ARID4B:              | 21794  | downstream           | 1 | 27.000 | 1 | 1_Testes_ARID4B: |
| 1_Testes_ARID4B:              | -9370  | upstream             | 1 | 27.000 | 1 | 1_Testes_ARID4B: |
| 1_Testes_ARID4B:              | -10218 | upstream             | 1 | 27.000 | 1 | 1_Testes_ARID4B: |
| 1_Testes_ARID4B:              | 196    | in gene              | 1 | 27.000 | 1 | 1_Testes_ARID4B: |
| 1_Testes_ARID4B:              | 30     | in gene              | 1 | 31.000 | 1 | 1_Testes_ARID4B: |
| 1_Testes_ARID4B:              | 347    | in gene              | 1 | 16.000 | 1 | 1_Testes_ARID4B: |
| 1_Testes_ARID4B:              | -260   | upstream             | 1 | 19.000 | 1 | 1_Testes_ARID4B: |
| 1_Testes_ARID4B:              | 11844  | downstream           | 1 | 19.000 | 1 | 1_Testes_ARID4B: |
| 1_Testes_ARID4B:              | 8820   | downstream           | 1 | 29.000 | 1 | 1_Testes_ARID4B: |
| 1_Testes_ARID4B:              | -1846  | upstream             | 1 | 29.000 | 1 | 1_Testes_ARID4B: |
| 1_Testes_ARID4B:              | 631    | in gene              | 1 | 29.000 | 1 | 1_Testes_ARID4B: |
| 1_Testes_ARID4B:              | 13587  | downstream           | 1 | 20.000 | 1 | 1_Testes_ARID4B: |
| 1_Testes_ARID4B:              | 1200   | in gene              | 1 | 20.000 | 1 | 1_Testes_ARID4B: |
| 1_Testes_ARID4B:              | -220   | upstream             | 1 | 20.000 | 1 | 1_Testes_ARID4B: |
| 1_Testes_ARID4B:              | -1926  | upstream             | 1 | 17.000 | 1 | 1_Testes_ARID4B: |
| 1_Testes_ARID4B:              | -4174  | upstream             | 1 | 17.000 | 1 | 1_Testes_ARID4B: |
| 1_Testes_ARID4B: 559, 11263   |        | in gene, downstream  | 1 | 17.500 | 2 | 1_Testes_ARID4B: |
| 1_Testes_ARID4B:              | -1996  | upstream             | 1 | 18.000 | 1 | 1_Testes_ARID4B: |
| 1_Testes_ARID4B:              | 4017   | in gene              | 1 | 26.000 | 1 | 1_Testes_ARID4B: |
| 1_Testes_ARID4B: 14918, 305   |        | downstream, in gene  | 1 | 27.500 | 2 | 1_Testes_ARID4B: |
| 1_Testes_ARID4B: -370, 13262  |        | upstream, downstream | 1 | 24.500 | 2 | 1_Testes_ARID4B: |
| 1_Testes_ARID4B: 13634, 2     |        | downstream, in gene  | 1 | 24.500 | 2 | 1_Testes_ARID4B: |
| 1_Testes_ARID4B:              | 211    | in gene              | 1 | 27.000 | 1 | 1_Testes_ARID4B: |
| 1_Testes_ARID4B:              | -307   | upstream             | 1 | 22.000 | 1 | 1_Testes_ARID4B: |
| 1_Testes_ARID4B:              | 135    | in gene              | 1 | 23.000 | 1 | 1_Testes_ARID4B: |
| 1_Testes_ARID4B:              | 12204  | downstream           | 1 | 23.000 | 1 | 1_Testes_ARID4B: |
| 1_Testes_ARID4B:              | 261    | in gene              | 1 | 24.000 | 1 | 1_Testes_ARID4B: |



|                                     |                          |   |        |   |                  |
|-------------------------------------|--------------------------|---|--------|---|------------------|
| 1_Testes_ARID4B:                    | -3092 upstream           | 1 | 20.000 | 1 | 1_Testes_ARID4B: |
| 1_Testes_ARID4B:                    | 192 in gene              | 1 | 18.000 | 1 | 1_Testes_ARID4B: |
| 1_Testes_ARID4B: -550, 19450        | upstream, downstream     | 1 | 18.500 | 2 | 1_Testes_ARID4B: |
| 1_Testes_ARID4B: 262, 191622        | in gene, downstream      | 1 | 19.000 | 2 | 1_Testes_ARID4B: |
| 1_Testes_ARID4B: -429, 8979         | upstream, downstream     | 1 | 22.000 | 2 | 1_Testes_ARID4B: |
| 1_Testes_ARID4B: 10522, 1114        | downstream, in gene      | 1 | 22.000 | 2 | 1_Testes_ARID4B: |
| 1_Testes_ARID4B:                    | 32395 downstream         | 1 | 25.000 | 1 | 1_Testes_ARID4B: |
| 1_Testes_ARID4B:                    | 106 in gene              | 1 | 17.000 | 1 | 1_Testes_ARID4B: |
| 1_Testes_ARID4B:                    | 186762 downstream        | 1 | 25.000 | 1 | 1_Testes_ARID4B: |
| 1_Testes_ARID4B:                    | 92 in gene               | 1 | 25.000 | 1 | 1_Testes_ARID4B: |
| 1_Testes_ARID4B:                    | -3732 upstream           | 1 | 25.000 | 1 | 1_Testes_ARID4B: |
| 1_Testes_ARID4B:                    | 181 in gene              | 1 | 45.000 | 1 | 1_Testes_ARID4B: |
| 1_Testes_ARID4B:                    | 24996 downstream         | 1 | 45.000 | 1 | 1_Testes_ARID4B: |
| 1_Testes_ARID4B:                    | 902 in gene              | 1 | 37.000 | 1 | 1_Testes_ARID4B: |
| 1_Testes_ARID4B:                    | 1024 in gene             | 1 | 25.000 | 1 | 1_Testes_ARID4B: |
| 1_Testes_ARID4B:                    | 527 in gene              | 1 | 29.000 | 1 | 1_Testes_ARID4B: |
| 1_Testes_ARID4B:                    | -52 upstream             | 1 | 26.000 | 1 | 1_Testes_ARID4B: |
| 1_Testes_ARID4B:                    | 97 in gene               | 1 | 22.000 | 1 | 1_Testes_ARID4B: |
| 1_Testes_ARID4B:                    | -115 upstream            | 1 | 22.000 | 1 | 1_Testes_ARID4B: |
| 1_Testes_ARID4B: 31555, 67          | downstream, in gene      | 1 | 26.000 | 2 | 1_Testes_ARID4B: |
| 1_Testes_ARID4B:                    | 88 in gene               | 1 | 25.000 | 1 | 1_Testes_ARID4B: |
| 1_Testes_ARID4B:                    | 260 in gene              | 1 | 37.000 | 1 | 1_Testes_ARID4B: |
| 1_Testes_ARID4B:                    | 880 in gene              | 1 | 38.000 | 1 | 1_Testes_ARID4B: |
| 1_Testes_ARID4B:                    | 570 in gene              | 1 | 32.000 | 1 | 1_Testes_ARID4B: |
| 1_Testes_ARID4B:                    | 178 in gene              | 1 | 27.000 | 1 | 1_Testes_ARID4B: |
| 1_Testes_ARID4B: 36568, 808, 200    | downstream, in gene, i   | 1 | 32.667 | 3 | 1_Testes_ARID4B: |
| 1_Testes_ARID4B: 13790, 13182       | downstream, downstre     | 1 | 35.500 | 2 | 1_Testes_ARID4B: |
| 1_Testes_ARID4B:                    | -34 upstream             | 1 | 17.000 | 1 | 1_Testes_ARID4B: |
| 1_Testes_ARID4B:                    | 409 in gene              | 1 | 34.000 | 1 | 1_Testes_ARID4B: |
| 1_Testes_ARID4B:                    | 268 in gene              | 1 | 18.000 | 1 | 1_Testes_ARID4B: |
| 1_Testes_ARID4B:                    | 440 in gene              | 1 | 20.000 | 1 | 1_Testes_ARID4B: |
| 1_Testes_ARID4B:                    | 5492 in gene             | 1 | 20.000 | 1 | 1_Testes_ARID4B: |
| 1_Testes_ARID4B:                    | 67 in gene               | 1 | 28.000 | 1 | 1_Testes_ARID4B: |
| 1_Testes_ARID4B: -466, -4242, -6914 | upstream, upstream, u    | 1 | 29.667 | 3 | 1_Testes_ARID4B: |
| 1_Testes_ARID4B: 447, 4223, 6895    | in gene, in gene, in gen | 1 | 29.667 | 3 | 1_Testes_ARID4B: |
| 1_Testes_ARID4B:                    | 183 in gene              | 1 | 24.000 | 1 | 1_Testes_ARID4B: |
| 1_Testes_ARID4B:                    | 19348 in gene            | 1 | 17.000 | 1 | 1_Testes_ARID4B: |
| 1_Testes_ARID4B:                    | -4953 upstream           | 1 | 23.000 | 1 | 1_Testes_ARID4B: |
| 1_Testes_ARID4B:                    | 625 in gene              | 1 | 23.000 | 1 | 1_Testes_ARID4B: |
| 1_Testes_ARID4B:                    | -6709 upstream           | 1 | 29.000 | 1 | 1_Testes_ARID4B: |
| 1_Testes_ARID4B:                    | 4031 downstream          | 1 | 29.000 | 1 | 1_Testes_ARID4B: |
| 1_Testes_ARID4B:                    | -314 upstream            | 1 | 29.000 | 1 | 1_Testes_ARID4B: |
| 1_Testes_ARID4B:                    | -2981 upstream           | 1 | 29.000 | 1 | 1_Testes_ARID4B: |
| 1_Testes_ARID4B:                    | 85 in gene               | 1 | 30.000 | 1 | 1_Testes_ARID4B: |
| 1_Testes_ARID4B: 1032, 88           | in gene, in gene         | 1 | 19.000 | 2 | 1_Testes_ARID4B: |
| 1_Testes_ARID4B:                    | 4066 in gene             | 1 | 18.000 | 1 | 1_Testes_ARID4B: |
| 1_Testes_ARID4B:                    | 6452 downstream          | 1 | 18.000 | 1 | 1_Testes_ARID4B: |

|                                      |                         |   |        |   |                  |
|--------------------------------------|-------------------------|---|--------|---|------------------|
| 1_Testes_ARID4B:                     | -554 upstream           | 1 | 18.000 | 1 | 1_Testes_ARID4B: |
| 1_Testes_ARID4B:                     | 85 in gene              | 1 | 22.000 | 1 | 1_Testes_ARID4B: |
| 1_Testes_ARID4B: 151, 90935          | in gene, downstream     | 1 | 25.500 | 2 | 1_Testes_ARID4B: |
| 1_Testes_ARID4B:                     | 144 in gene             | 1 | 24.000 | 1 | 1_Testes_ARID4B: |
| 1_Testes_ARID4B:                     | 221 in gene             | 1 | 34.000 | 1 | 1_Testes_ARID4B: |
| 1_Testes_ARID4B: 13991, 32935, 39719 | in gene, in gene, downs | 1 | 23.333 | 3 | 1_Testes_ARID4B: |
| 1_Testes_ARID4B: 7451, 667           | downstream, in gene     | 1 | 25.500 | 2 | 1_Testes_ARID4B: |
| 1_Testes_ARID4B:                     | 25142 downstream        | 1 | 28.000 | 1 | 1_Testes_ARID4B: |
| 1_Testes_ARID4B:                     | 462 in gene             | 1 | 22.000 | 1 | 1_Testes_ARID4B: |
| 1_Testes_ARID4B: 16437, 357          | downstream, in gene     | 1 | 23.500 | 2 | 1_Testes_ARID4B: |
| 1_Testes_ARID4B:                     | 1041 in gene            | 1 | 21.000 | 1 | 1_Testes_ARID4B: |
| 1_Testes_ARID4B:                     | -5567 upstream          | 1 | 25.000 | 1 | 1_Testes_ARID4B: |
| 1_Testes_ARID4B: 170, 12586          | in gene, downstream     | 1 | 29.000 | 2 | 1_Testes_ARID4B: |
| 1_Testes_ARID4B: 257, 65745          | in gene, downstream     | 1 | 31.500 | 2 | 1_Testes_ARID4B: |
| 1_Testes_ARID4B:                     | 47 in gene              | 1 | 30.000 | 1 | 1_Testes_ARID4B: |
| 1_Testes_ARID4B:                     | 170 in gene             | 1 | 26.000 | 1 | 1_Testes_ARID4B: |
| 1_Testes_ARID4B:                     | 148 in gene             | 1 | 18.000 | 1 | 1_Testes_ARID4B: |
| 1_Testes_ARID4B:                     | 40859 downstream        | 1 | 18.000 | 1 | 1_Testes_ARID4B: |
| 1_Testes_ARID4B:                     | -6573 upstream          | 1 | 18.000 | 1 | 1_Testes_ARID4B: |
| 1_Testes_ARID4B:                     | -7607 upstream          | 1 | 22.000 | 1 | 1_Testes_ARID4B: |
| 1_Testes_ARID4B:                     | 112 in gene             | 1 | 22.000 | 1 | 1_Testes_ARID4B: |
| 1_Testes_ARID4B:                     | 3509 in gene            | 1 | 24.000 | 1 | 1_Testes_ARID4B: |
| 1_Testes_ARID4B:                     | -3096 upstream          | 1 | 24.000 | 1 | 1_Testes_ARID4B: |
| 1_Testes_ARID4B:                     | -67 upstream            | 1 | 31.000 | 1 | 1_Testes_ARID4B: |
| 1_Testes_ARID4B:                     | 46693 downstream        | 1 | 24.000 | 1 | 1_Testes_ARID4B: |
| 1_Testes_ARID4B:                     | 104 in gene             | 1 | 24.000 | 1 | 1_Testes_ARID4B: |
| 1_Testes_ARID4B:                     | -9112 upstream          | 1 | 30.000 | 1 | 1_Testes_ARID4B: |
| 1_Testes_ARID4B: 196, 67684, 69668   | in gene, downstream, c  | 1 | 23.333 | 3 | 1_Testes_ARID4B: |
| 1_Testes_ARID4B: 415, 2399           | in gene, in gene        | 1 | 20.000 | 2 | 1_Testes_ARID4B: |
| 1_Testes_ARID4B: 17679, 15695        | downstream, downstre    | 1 | 20.000 | 2 | 1_Testes_ARID4B: |
| 1_Testes_ARID4B: 422, 17542          | in gene, in gene        | 1 | 23.000 | 2 | 1_Testes_ARID4B: |
| 1_Testes_ARID4B:                     | 5299 in gene            | 1 | 37.000 | 1 | 1_Testes_ARID4B: |
| 1_Testes_ARID4B:                     | 340 in gene             | 1 | 27.000 | 1 | 1_Testes_ARID4B: |
| 1_Testes_ARID4B:                     | 119 in gene             | 1 | 26.000 | 1 | 1_Testes_ARID4B: |
| 1_Testes_ARID4B:                     | -3959 upstream          | 1 | 26.000 | 1 | 1_Testes_ARID4B: |
| 1_Testes_ARID4B:                     | 93 in gene              | 1 | 35.000 | 1 | 1_Testes_ARID4B: |
| 1_Testes_ARID4B: 119160, 408         | downstream, in gene     | 1 | 33.000 | 2 | 1_Testes_ARID4B: |
| 1_Testes_ARID4B:                     | -480 upstream           | 1 | 31.000 | 1 | 1_Testes_ARID4B: |
| 1_Testes_ARID4B:                     | 120539 downstream       | 1 | 31.000 | 1 | 1_Testes_ARID4B: |
| 1_Testes_ARID4B:                     | 586 in gene             | 1 | 31.000 | 1 | 1_Testes_ARID4B: |
| 1_Testes_ARID4B:                     | -2029 upstream          | 1 | 31.000 | 1 | 1_Testes_ARID4B: |
| 1_Testes_ARID4B:                     | 109 in gene             | 1 | 27.000 | 1 | 1_Testes_ARID4B: |
| 1_Testes_ARID4B:                     | -166 upstream           | 1 | 27.000 | 1 | 1_Testes_ARID4B: |
| 1_Testes_ARID4B:                     | -272 upstream           | 1 | 44.000 | 1 | 1_Testes_ARID4B: |
| 1_Testes_ARID4B:                     | 162 in gene             | 1 | 44.000 | 1 | 1_Testes_ARID4B: |
| 1_Testes_ARID4B:                     | -7015 upstream          | 1 | 32.000 | 1 | 1_Testes_ARID4B: |
| 1_Testes_ARID4B:                     | 388 in gene             | 1 | 32.000 | 1 | 1_Testes_ARID4B: |

|                            |                     |   |        |   |                  |
|----------------------------|---------------------|---|--------|---|------------------|
| 1_Testes_ARID4B:           | 7148 downstream     | 1 | 32.000 | 1 | 1_Testes_ARID4B: |
| 1_Testes_ARID4B:           | -7472 upstream      | 1 | 32.000 | 1 | 1_Testes_ARID4B: |
| 1_Testes_ARID4B:           | 294 in gene         | 1 | 23.000 | 1 | 1_Testes_ARID4B: |
| 1_Testes_ARID4B:           | -377 upstream       | 1 | 20.000 | 1 | 1_Testes_ARID4B: |
| 1_Testes_ARID4B:           | 16 in gene          | 1 | 20.000 | 1 | 1_Testes_ARID4B: |
| 1_Testes_ARID4B:           | 129 in gene         | 1 | 22.000 | 1 | 1_Testes_ARID4B: |
| 1_Testes_ARID4B:           | 162 in gene         | 1 | 29.000 | 1 | 1_Testes_ARID4B: |
| 1_Testes_ARID4B:           | 67965 downstream    | 1 | 29.000 | 1 | 1_Testes_ARID4B: |
| 1_Testes_ARID4B:           | 33032 downstream    | 1 | 28.000 | 1 | 1_Testes_ARID4B: |
| 1_Testes_ARID4B:           | 20214 downstream    | 1 | 28.000 | 1 | 1_Testes_ARID4B: |
| 1_Testes_ARID4B:           | 255 in gene         | 1 | 38.000 | 1 | 1_Testes_ARID4B: |
| 1_Testes_ARID4B:           | -7007 upstream      | 1 | 38.000 | 1 | 1_Testes_ARID4B: |
| 1_Testes_ARID4B:           | -9923 upstream      | 1 | 38.000 | 1 | 1_Testes_ARID4B: |
| 1_Testes_ARID4B:           | 327 in gene         | 1 | 23.000 | 1 | 1_Testes_ARID4B: |
| 1_Testes_ARID4B:           | 119 in gene         | 1 | 19.000 | 1 | 1_Testes_ARID4B: |
| 1_Testes_ARID4B:           | 200 in gene         | 1 | 25.000 | 1 | 1_Testes_ARID4B: |
| 1_Testes_ARID4B:           | 496 in gene         | 1 | 24.000 | 1 | 1_Testes_ARID4B: |
| 1_Testes_ARID4B: 214, -506 | in gene, upstream   | 1 | 30.500 | 2 | 1_Testes_ARID4B: |
| 1_Testes_ARID4B:           | 182 in gene         | 1 | 29.000 | 1 | 1_Testes_ARID4B: |
| 1_Testes_ARID4B:           | 234 in gene         | 1 | 25.000 | 1 | 1_Testes_ARID4B: |
| 1_Testes_ARID4B:           | -434 upstream       | 1 | 25.000 | 1 | 1_Testes_ARID4B: |
| 1_Testes_ARID4B:           | -5973 upstream      | 1 | 34.000 | 1 | 1_Testes_ARID4B: |
| 1_Testes_ARID4B:           | 83 in gene          | 1 | 34.000 | 1 | 1_Testes_ARID4B: |
| 1_Testes_ARID4B:           | 160 in gene         | 1 | 25.000 | 1 | 1_Testes_ARID4B: |
| 1_Testes_ARID4B:           | -33 upstream        | 1 | 35.000 | 1 | 1_Testes_ARID4B: |
| 1_Testes_ARID4B:           | 69 in gene          | 1 | 31.000 | 1 | 1_Testes_ARID4B: |
| 1_Testes_ARID4B:           | 39660 downstream    | 1 | 27.000 | 1 | 1_Testes_ARID4B: |
| 1_Testes_ARID4B:           | -248 upstream       | 1 | 27.000 | 1 | 1_Testes_ARID4B: |
| 1_Testes_ARID4B: 89, 22425 | in gene, downstream | 1 | 30.500 | 2 | 1_Testes_ARID4B: |
| 1_Testes_ARID4B:           | 38 in gene          | 1 | 34.000 | 1 | 1_Testes_ARID4B: |
| 1_Testes_ARID4B:           | 171 in gene         | 1 | 34.000 | 1 | 1_Testes_ARID4B: |
| 1_Testes_ARID4B:           | 38746 in gene       | 1 | 21.000 | 1 | 1_Testes_ARID4B: |
| 1_Testes_ARID4B:           | -2779 upstream      | 1 | 30.000 | 1 | 1_Testes_ARID4B: |
| 1_Testes_ARID4B:           | 30 in gene          | 1 | 30.000 | 1 | 1_Testes_ARID4B: |
| 1_Testes_ARID4B:           | 211 in gene         | 1 | 29.000 | 1 | 1_Testes_ARID4B: |
| 1_Testes_ARID4B:           | 273132 downstream   | 1 | 32.000 | 1 | 1_Testes_ARID4B: |
| 1_Testes_ARID4B:           | 1722 in gene        | 1 | 32.000 | 1 | 1_Testes_ARID4B: |
| 1_Testes_ARID4B:           | 99 in gene          | 1 | 19.000 | 1 | 1_Testes_ARID4B: |
| 1_Testes_ARID4B:           | 11 in gene          | 1 | 25.000 | 1 | 1_Testes_ARID4B: |
| 1_Testes_ARID4B:           | 257 in gene         | 1 | 28.000 | 1 | 1_Testes_ARID4B: |
| 1_Testes_ARID4B:           | 356 in gene         | 1 | 26.000 | 1 | 1_Testes_ARID4B: |
| 1_Testes_ARID4B:           | 9062 in gene        | 1 | 20.000 | 1 | 1_Testes_ARID4B: |
| 1_Testes_ARID4B:           | -249 upstream       | 1 | 34.000 | 1 | 1_Testes_ARID4B: |
| 1_Testes_ARID4B:           | 213 in gene         | 1 | 34.000 | 1 | 1_Testes_ARID4B: |
| 1_Testes_ARID4B:           | -21 upstream        | 1 | 26.000 | 1 | 1_Testes_ARID4B: |
| 1_Testes_ARID4B:           | 204 in gene         | 1 | 21.000 | 1 | 1_Testes_ARID4B: |
| 1_Testes_ARID4B:           | -362 upstream       | 1 | 21.000 | 1 | 1_Testes_ARID4B: |

|                               |        |                     |   |        |   |                  |
|-------------------------------|--------|---------------------|---|--------|---|------------------|
| 1_Testes_ARID4B:              | 12964  | downstream          | 1 | 21.000 | 1 | 1_Testes_ARID4B: |
| 1_Testes_ARID4B:              | 771    | in gene             | 1 | 30.000 | 1 | 1_Testes_ARID4B: |
| 1_Testes_ARID4B:              | 171    | in gene             | 1 | 30.000 | 1 | 1_Testes_ARID4B: |
| 1_Testes_ARID4B:              | 340    | in gene             | 1 | 44.000 | 1 | 1_Testes_ARID4B: |
| 1_Testes_ARID4B:              | 79366  | downstream          | 1 | 33.000 | 1 | 1_Testes_ARID4B: |
| 1_Testes_ARID4B:              | 148    | in gene             | 1 | 33.000 | 1 | 1_Testes_ARID4B: |
| 1_Testes_ARID4B:              | -955   | upstream            | 1 | 33.000 | 1 | 1_Testes_ARID4B: |
| 1_Testes_ARID4B:              | -3466  | upstream            | 1 | 33.000 | 1 | 1_Testes_ARID4B: |
| 1_Testes_ARID4B:              | 9891   | downstream          | 1 | 33.000 | 1 | 1_Testes_ARID4B: |
| 1_Testes_ARID4B: -1027, 69421 |        | upstream, in gene   | 1 | 20.500 | 2 | 1_Testes_ARID4B: |
| 1_Testes_ARID4B:              | 113562 | downstream          | 1 | 31.000 | 1 | 1_Testes_ARID4B: |
| 1_Testes_ARID4B:              | -91    | upstream            | 1 | 31.000 | 1 | 1_Testes_ARID4B: |
| 1_Testes_ARID4B:              | 83     | in gene             | 1 | 31.000 | 1 | 1_Testes_ARID4B: |
| 1_Testes_ARID4B: 246, -5898   |        | in gene, upstream   | 1 | 20.500 | 2 | 1_Testes_ARID4B: |
| 1_Testes_ARID4B: 235, -5909   |        | in gene, upstream   | 1 | 20.500 | 2 | 1_Testes_ARID4B: |
| 1_Testes_ARID4B: 13011, 6867  |        | downstream, in gene | 1 | 20.500 | 2 | 1_Testes_ARID4B: |
| 1_Testes_ARID4B:              | 431    | in gene             | 1 | 19.000 | 1 | 1_Testes_ARID4B: |
| 1_Testes_ARID4B:              | -516   | upstream            | 1 | 29.000 | 1 | 1_Testes_ARID4B: |
| 1_Testes_ARID4B:              | 416    | in gene             | 1 | 29.000 | 1 | 1_Testes_ARID4B: |
| 1_Testes_ARID4B:              | 17388  | in gene             | 1 | 24.000 | 1 | 1_Testes_ARID4B: |
| 1_Testes_ARID4B:              | 15220  | downstream          | 1 | 24.000 | 1 | 1_Testes_ARID4B: |
| 1_Testes_ARID4B:              | -4582  | upstream            | 1 | 44.000 | 1 | 1_Testes_ARID4B: |
| 1_Testes_ARID4B:              | 620    | in gene             | 1 | 44.000 | 1 | 1_Testes_ARID4B: |
| 1_Testes_ARID4B:              | -7556  | upstream            | 1 | 44.000 | 1 | 1_Testes_ARID4B: |
| 1_Testes_ARID4B:              | 156    | in gene             | 1 | 21.000 | 1 | 1_Testes_ARID4B: |
| 1_Testes_ARID4B:              | 108    | in gene             | 1 | 22.000 | 1 | 1_Testes_ARID4B: |
| 1_Testes_ARID4B:              | 554    | in gene             | 1 | 26.000 | 1 | 1_Testes_ARID4B: |
| 1_Testes_ARID4B:              | 152    | in gene             | 1 | 21.000 | 1 | 1_Testes_ARID4B: |
| 1_Testes_ARID4B:              | 484    | in gene             | 1 | 18.000 | 1 | 1_Testes_ARID4B: |
| 1_Testes_ARID4B:              | 468    | in gene             | 1 | 23.000 | 1 | 1_Testes_ARID4B: |
| 1_Testes_ARID4B:              | -10228 | upstream            | 1 | 31.000 | 1 | 1_Testes_ARID4B: |
| 1_Testes_ARID4B:              | 151    | in gene             | 1 | 31.000 | 1 | 1_Testes_ARID4B: |
| 1_Testes_ARID4B:              | 552    | in gene             | 1 | 22.000 | 1 | 1_Testes_ARID4B: |
| 1_Testes_ARID4B:              | 118    | in gene             | 1 | 30.000 | 1 | 1_Testes_ARID4B: |
| 1_Testes_ARID4B:              | -399   | upstream            | 1 | 30.000 | 1 | 1_Testes_ARID4B: |
| 1_Testes_ARID4B:              | 1278   | in gene             | 1 | 18.000 | 1 | 1_Testes_ARID4B: |
| 1_Testes_ARID4B:              | -815   | upstream            | 1 | 19.000 | 1 | 1_Testes_ARID4B: |
| 1_Testes_ARID4B:              | 129    | in gene             | 1 | 18.000 | 1 | 1_Testes_ARID4B: |
| 1_Testes_ARID4B: 1096, -808   |        | in gene, upstream   | 1 | 21.500 | 2 | 1_Testes_ARID4B: |
| 1_Testes_ARID4B:              | 590    | in gene             | 1 | 19.000 | 1 | 1_Testes_ARID4B: |
| 1_Testes_ARID4B:              | 629    | in gene             | 1 | 22.000 | 1 | 1_Testes_ARID4B: |
| 1_Testes_ARID4B:              | -163   | upstream            | 1 | 26.000 | 1 | 1_Testes_ARID4B: |
| 1_Testes_ARID4B:              | 895    | in gene             | 1 | 30.000 | 1 | 1_Testes_ARID4B: |
| 1_Testes_ARID4B:              | 166    | in gene             | 1 | 42.000 | 1 | 1_Testes_ARID4B: |
| 1_Testes_ARID4B:              | -4534  | upstream            | 1 | 42.000 | 1 | 1_Testes_ARID4B: |
| 1_Testes_ARID4B:              | -299   | upstream            | 1 | 42.000 | 1 | 1_Testes_ARID4B: |
| 1_Testes_ARID4B:              | 43867  | downstream          | 1 | 26.000 | 1 | 1_Testes_ARID4B: |

|                  |                    |                          |   |        |   |                  |
|------------------|--------------------|--------------------------|---|--------|---|------------------|
| 1_Testes_ARID4B: | 6031               | downstream               | 1 | 26.000 | 1 | 1_Testes_ARID4B: |
| 1_Testes_ARID4B: | 143                | in gene                  | 1 | 26.000 | 1 | 1_Testes_ARID4B: |
| 1_Testes_ARID4B: | 103                | in gene                  | 1 | 37.000 | 1 | 1_Testes_ARID4B: |
| 1_Testes_ARID4B: | -20                | upstream                 | 1 | 31.000 | 1 | 1_Testes_ARID4B: |
| 1_Testes_ARID4B: | -64                | upstream                 | 1 | 31.000 | 1 | 1_Testes_ARID4B: |
| 1_Testes_ARID4B: | -3453, 179, 1107   | upstream, in gene, in g  | 1 | 17.000 | 3 | 1_Testes_ARID4B: |
| 1_Testes_ARID4B: | 60                 | in gene                  | 1 | 36.000 | 1 | 1_Testes_ARID4B: |
| 1_Testes_ARID4B: | 2873               | in gene                  | 1 | 17.000 | 1 | 1_Testes_ARID4B: |
| 1_Testes_ARID4B: | 11631              | downstream               | 1 | 24.000 | 1 | 1_Testes_ARID4B: |
| 1_Testes_ARID4B: | 1180               | in gene                  | 1 | 24.000 | 1 | 1_Testes_ARID4B: |
| 1_Testes_ARID4B: | 8761               | downstream               | 1 | 23.000 | 1 | 1_Testes_ARID4B: |
| 1_Testes_ARID4B: | 256                | in gene                  | 1 | 23.000 | 1 | 1_Testes_ARID4B: |
| 1_Testes_ARID4B: | 76                 | in gene                  | 1 | 26.000 | 1 | 1_Testes_ARID4B: |
| 1_Testes_ARID4B: | 417                | in gene                  | 1 | 25.000 | 1 | 1_Testes_ARID4B: |
| 1_Testes_ARID4B: | 107                | in gene                  | 1 | 25.000 | 1 | 1_Testes_ARID4B: |
| 1_Testes_ARID4B: | 59824, 176         | downstream, in gene      | 1 | 21.500 | 2 | 1_Testes_ARID4B: |
| 1_Testes_ARID4B: | 570                | in gene                  | 1 | 18.000 | 1 | 1_Testes_ARID4B: |
| 1_Testes_ARID4B: | 148                | in gene                  | 1 | 32.000 | 1 | 1_Testes_ARID4B: |
| 1_Testes_ARID4B: | 294                | in gene                  | 1 | 24.000 | 1 | 1_Testes_ARID4B: |
| 1_Testes_ARID4B: | 173                | in gene                  | 1 | 31.000 | 1 | 1_Testes_ARID4B: |
| 1_Testes_ARID4B: | 205                | in gene                  | 1 | 33.000 | 1 | 1_Testes_ARID4B: |
| 1_Testes_ARID4B: | 10337              | downstream               | 1 | 33.000 | 1 | 1_Testes_ARID4B: |
| 1_Testes_ARID4B: | 12007, 24311       | in gene, downstream      | 1 | 26.000 | 2 | 1_Testes_ARID4B: |
| 1_Testes_ARID4B: | 316                | in gene                  | 1 | 25.000 | 1 | 1_Testes_ARID4B: |
| 1_Testes_ARID4B: | 232                | in gene                  | 1 | 30.000 | 1 | 1_Testes_ARID4B: |
| 1_Testes_ARID4B: | 16                 | in gene                  | 1 | 17.000 | 1 | 1_Testes_ARID4B: |
| 1_Testes_ARID4B: | 463                | in gene                  | 1 | 21.000 | 1 | 1_Testes_ARID4B: |
| 1_Testes_ARID4B: | 11884              | downstream               | 1 | 21.000 | 1 | 1_Testes_ARID4B: |
| 1_Testes_ARID4B: | 1166               | in gene                  | 1 | 36.000 | 1 | 1_Testes_ARID4B: |
| 1_Testes_ARID4B: | 1220               | in gene                  | 1 | 33.000 | 1 | 1_Testes_ARID4B: |
| 1_Testes_ARID4B: | -1763              | upstream                 | 1 | 33.000 | 1 | 1_Testes_ARID4B: |
| 1_Testes_ARID4B: | -4147              | upstream                 | 1 | 21.000 | 1 | 1_Testes_ARID4B: |
| 1_Testes_ARID4B: | 192, 7552          | in gene, in gene         | 1 | 23.000 | 2 | 1_Testes_ARID4B: |
| 1_Testes_ARID4B: | 203, 36651, 38208  | in gene, in gene, in gen | 1 | 28.667 | 3 | 1_Testes_ARID4B: |
| 1_Testes_ARID4B: | 238                | in gene                  | 1 | 39.000 | 1 | 1_Testes_ARID4B: |
| 1_Testes_ARID4B: | 2130, 514          | in gene, in gene         | 1 | 20.000 | 2 | 1_Testes_ARID4B: |
| 1_Testes_ARID4B: | 324                | in gene                  | 1 | 21.000 | 1 | 1_Testes_ARID4B: |
| 1_Testes_ARID4B: | 21640              | downstream               | 1 | 24.000 | 1 | 1_Testes_ARID4B: |
| 1_Testes_ARID4B: | 216, -10024        | in gene, upstream        | 1 | 26.500 | 2 | 1_Testes_ARID4B: |
| 1_Testes_ARID4B: | 18590, 8350        | downstream, in gene      | 1 | 26.500 | 2 | 1_Testes_ARID4B: |
| 1_Testes_ARID4B: | 52683              | downstream               | 1 | 36.000 | 1 | 1_Testes_ARID4B: |
| 1_Testes_ARID4B: | 215                | in gene                  | 1 | 36.000 | 1 | 1_Testes_ARID4B: |
| 1_Testes_ARID4B: | 468                | in gene                  | 1 | 26.000 | 1 | 1_Testes_ARID4B: |
| 1_Testes_ARID4B: | 168                | in gene                  | 1 | 27.000 | 1 | 1_Testes_ARID4B: |
| 1_Testes_ARID4B: | -174               | upstream                 | 1 | 31.000 | 1 | 1_Testes_ARID4B: |
| 1_Testes_ARID4B: | -155               | upstream                 | 1 | 31.000 | 1 | 1_Testes_ARID4B: |
| 1_Testes_ARID4B: | 86003, 84979, 1875 | in gene, in gene, in gen | 1 | 23.000 | 3 | 1_Testes_ARID4B: |

|                              |                     |   |        |   |                  |
|------------------------------|---------------------|---|--------|---|------------------|
| 1_Testes_ARID4B:             | 843 in gene         | 1 | 23.000 | 1 | 1_Testes_ARID4B: |
| 1_Testes_ARID4B:             | 338 in gene         | 1 | 23.000 | 1 | 1_Testes_ARID4B: |
| 1_Testes_ARID4B:             | 116 in gene         | 1 | 22.000 | 1 | 1_Testes_ARID4B: |
| 1_Testes_ARID4B:             | 412 in gene         | 1 | 19.000 | 1 | 1_Testes_ARID4B: |
| 1_Testes_ARID4B:             | -10731 upstream     | 1 | 19.000 | 1 | 1_Testes_ARID4B: |
| 1_Testes_ARID4B:             | 268 in gene         | 1 | 19.000 | 1 | 1_Testes_ARID4B: |
| 1_Testes_ARID4B:             | -10119 upstream     | 1 | 24.000 | 1 | 1_Testes_ARID4B: |
| 1_Testes_ARID4B:             | 424 in gene         | 1 | 24.000 | 1 | 1_Testes_ARID4B: |
| 1_Testes_ARID4B:             | 222 in gene         | 1 | 16.000 | 1 | 1_Testes_ARID4B: |
| 1_Testes_ARID4B:             | 362 in gene         | 1 | 39.000 | 1 | 1_Testes_ARID4B: |
| 1_Testes_ARID4B:             | 458 in gene         | 1 | 28.000 | 1 | 1_Testes_ARID4B: |
| 1_Testes_ARID4B:             | 247 in gene         | 1 | 27.000 | 1 | 1_Testes_ARID4B: |
| 1_Testes_ARID4B:             | 128 in gene         | 1 | 31.000 | 1 | 1_Testes_ARID4B: |
| 1_Testes_ARID4B:             | 58799 downstream    | 1 | 31.000 | 1 | 1_Testes_ARID4B: |
| 1_Testes_ARID4B:             | 96 in gene          | 1 | 29.000 | 1 | 1_Testes_ARID4B: |
| 1_Testes_ARID4B:             | 37187 downstream    | 1 | 29.000 | 1 | 1_Testes_ARID4B: |
| 1_Testes_ARID4B:             | 51280 downstream    | 1 | 19.000 | 1 | 1_Testes_ARID4B: |
| 1_Testes_ARID4B:             | -7421 upstream      | 1 | 19.000 | 1 | 1_Testes_ARID4B: |
| 1_Testes_ARID4B:             | 301 in gene         | 1 | 19.000 | 1 | 1_Testes_ARID4B: |
| 1_Testes_ARID4B:             | 8230 downstream     | 1 | 19.000 | 1 | 1_Testes_ARID4B: |
| 1_Testes_ARID4B:             | 146 in gene         | 1 | 30.000 | 1 | 1_Testes_ARID4B: |
| 1_Testes_ARID4B:             | 243 in gene         | 1 | 26.000 | 1 | 1_Testes_ARID4B: |
| 1_Testes_ARID4B: 46509, 253  | downstream, in gene | 1 | 24.500 | 2 | 1_Testes_ARID4B: |
| 1_Testes_ARID4B:             | 253 in gene         | 1 | 23.000 | 1 | 1_Testes_ARID4B: |
| 1_Testes_ARID4B:             | -198 upstream       | 1 | 43.000 | 1 | 1_Testes_ARID4B: |
| 1_Testes_ARID4B:             | 231 in gene         | 1 | 43.000 | 1 | 1_Testes_ARID4B: |
| 1_Testes_ARID4B: 35856, 272  | downstream, in gene | 1 | 42.000 | 2 | 1_Testes_ARID4B: |
| 1_Testes_ARID4B:             | -362 upstream       | 1 | 41.000 | 1 | 1_Testes_ARID4B: |
| 1_Testes_ARID4B: 153, 115689 | in gene, downstream | 1 | 33.500 | 2 | 1_Testes_ARID4B: |
| 1_Testes_ARID4B:             | 368 in gene         | 1 | 30.000 | 1 | 1_Testes_ARID4B: |
| 1_Testes_ARID4B:             | -137 upstream       | 1 | 30.000 | 1 | 1_Testes_ARID4B: |
| 1_Testes_ARID4B:             | -10066 upstream     | 1 | 30.000 | 1 | 1_Testes_ARID4B: |
| 1_Testes_ARID4B:             | -10324 upstream     | 1 | 29.000 | 1 | 1_Testes_ARID4B: |
| 1_Testes_ARID4B:             | 452 in gene         | 1 | 29.000 | 1 | 1_Testes_ARID4B: |
| 1_Testes_ARID4B:             | -562 upstream       | 1 | 17.000 | 1 | 1_Testes_ARID4B: |
| 1_Testes_ARID4B: 279, 107671 | in gene, in gene    | 1 | 21.500 | 2 | 1_Testes_ARID4B: |
| 1_Testes_ARID4B:             | -467 upstream       | 1 | 26.000 | 1 | 1_Testes_ARID4B: |
| 1_Testes_ARID4B:             | -257 upstream       | 1 | 32.000 | 1 | 1_Testes_ARID4B: |
| 1_Testes_ARID4B: 99, 23155   | in gene, downstream | 1 | 30.000 | 2 | 1_Testes_ARID4B: |
| 1_Testes_ARID4B:             | -287 upstream       | 1 | 28.000 | 1 | 1_Testes_ARID4B: |
| 1_Testes_ARID4B:             | -5163 upstream      | 1 | 28.000 | 1 | 1_Testes_ARID4B: |
| 1_Testes_ARID4B:             | 110 in gene         | 1 | 28.000 | 1 | 1_Testes_ARID4B: |
| 1_Testes_ARID4B:             | 23846 downstream    | 1 | 28.000 | 1 | 1_Testes_ARID4B: |
| 1_Testes_ARID4B:             | 99 in gene          | 1 | 30.000 | 1 | 1_Testes_ARID4B: |
| 1_Testes_ARID4B: 72289, 321  | downstream, in gene | 1 | 27.500 | 2 | 1_Testes_ARID4B: |
| 1_Testes_ARID4B:             | -8111 upstream      | 1 | 25.000 | 1 | 1_Testes_ARID4B: |
| 1_Testes_ARID4B:             | 118 in gene         | 1 | 26.000 | 1 | 1_Testes_ARID4B: |

|                                    |                      |   |        |   |                  |
|------------------------------------|----------------------|---|--------|---|------------------|
| 1_Testes_ARID4B:                   | -202 upstream        | 1 | 23.000 | 1 | 1_Testes_ARID4B: |
| 1_Testes_ARID4B: 74813, 317        | downstream, in gene  | 1 | 29.500 | 2 | 1_Testes_ARID4B: |
| 1_Testes_ARID4B:                   | 134 in gene          | 1 | 36.000 | 1 | 1_Testes_ARID4B: |
| 1_Testes_ARID4B:                   | 182 in gene          | 1 | 24.000 | 1 | 1_Testes_ARID4B: |
| 1_Testes_ARID4B: 5849, 185         | in gene, in gene     | 1 | 25.000 | 2 | 1_Testes_ARID4B: |
| 1_Testes_ARID4B: 402, 6066         | in gene, downstream  | 1 | 25.000 | 2 | 1_Testes_ARID4B: |
| 1_Testes_ARID4B:                   | 146 in gene          | 1 | 30.000 | 1 | 1_Testes_ARID4B: |
| 1_Testes_ARID4B:                   | 515 in gene          | 1 | 25.000 | 1 | 1_Testes_ARID4B: |
| 1_Testes_ARID4B: 1267, 101555      | in gene, downstream  | 1 | 29.000 | 2 | 1_Testes_ARID4B: |
| 1_Testes_ARID4B:                   | 189 in gene          | 1 | 37.000 | 1 | 1_Testes_ARID4B: |
| 1_Testes_ARID4B:                   | 620 in gene          | 1 | 24.000 | 1 | 1_Testes_ARID4B: |
| 1_Testes_ARID4B: 247, 86023        | in gene, downstream  | 1 | 30.500 | 2 | 1_Testes_ARID4B: |
| 1_Testes_ARID4B:                   | 610 in gene          | 1 | 33.000 | 1 | 1_Testes_ARID4B: |
| 1_Testes_ARID4B:                   | 190 in gene          | 1 | 27.000 | 1 | 1_Testes_ARID4B: |
| 1_Testes_ARID4B: -7870, 31458      | upstream, downstream | 1 | 26.000 | 2 | 1_Testes_ARID4B: |
| 1_Testes_ARID4B:                   | 200 in gene          | 1 | 25.000 | 1 | 1_Testes_ARID4B: |
| 1_Testes_ARID4B:                   | 172 in gene          | 1 | 36.000 | 1 | 1_Testes_ARID4B: |
| 1_Testes_ARID4B:                   | 30007 downstream     | 1 | 26.000 | 1 | 1_Testes_ARID4B: |
| 1_Testes_ARID4B: 16, 37280         | in gene, downstream  | 1 | 25.500 | 2 | 1_Testes_ARID4B: |
| 1_Testes_ARID4B:                   | 117 in gene          | 1 | 25.000 | 1 | 1_Testes_ARID4B: |
| 1_Testes_ARID4B:                   | 238 in gene          | 1 | 36.000 | 1 | 1_Testes_ARID4B: |
| 1_Testes_ARID4B:                   | 149 in gene          | 1 | 48.000 | 1 | 1_Testes_ARID4B: |
| 1_Testes_ARID4B:                   | -65 upstream         | 1 | 48.000 | 1 | 1_Testes_ARID4B: |
| 1_Testes_ARID4B:                   | 215 in gene          | 1 | 29.000 | 1 | 1_Testes_ARID4B: |
| 1_Testes_ARID4B:                   | 78 in gene           | 1 | 29.000 | 1 | 1_Testes_ARID4B: |
| 1_Testes_ARID4B:                   | 403 in gene          | 1 | 29.000 | 1 | 1_Testes_ARID4B: |
| 1_Testes_ARID4B:                   | 478 in gene          | 1 | 34.000 | 1 | 1_Testes_ARID4B: |
| 1_Testes_ARID4B:                   | -3554 upstream       | 1 | 34.000 | 1 | 1_Testes_ARID4B: |
| 1_Testes_ARID4B:                   | 2825 in gene         | 1 | 20.000 | 1 | 1_Testes_ARID4B: |
| 1_Testes_ARID4B:                   | 14454 downstream     | 1 | 20.000 | 1 | 1_Testes_ARID4B: |
| 1_Testes_ARID4B:                   | -12 upstream         | 1 | 16.000 | 1 | 1_Testes_ARID4B: |
| 1_Testes_ARID4B:                   | 405 in gene          | 1 | 30.000 | 1 | 1_Testes_ARID4B: |
| 1_Testes_ARID4B:                   | 12342 downstream     | 1 | 30.000 | 1 | 1_Testes_ARID4B: |
| 1_Testes_ARID4B: 100, 11460        | in gene, downstream  | 1 | 26.500 | 2 | 1_Testes_ARID4B: |
| 1_Testes_ARID4B:                   | 75 in gene           | 1 | 32.000 | 1 | 1_Testes_ARID4B: |
| 1_Testes_ARID4B:                   | -2669 upstream       | 1 | 25.000 | 1 | 1_Testes_ARID4B: |
| 1_Testes_ARID4B:                   | -5 upstream          | 1 | 25.000 | 1 | 1_Testes_ARID4B: |
| 1_Testes_ARID4B:                   | -79 upstream         | 1 | 25.000 | 1 | 1_Testes_ARID4B: |
| 1_Testes_ARID4B:                   | -6474 upstream       | 1 | 32.000 | 1 | 1_Testes_ARID4B: |
| 1_Testes_ARID4B:                   | 187 in gene          | 1 | 32.000 | 1 | 1_Testes_ARID4B: |
| 1_Testes_ARID4B:                   | 18673 downstream     | 1 | 32.000 | 1 | 1_Testes_ARID4B: |
| 1_Testes_ARID4B: 10210, 11170      | downstream, downstre | 1 | 28.000 | 2 | 1_Testes_ARID4B: |
| 1_Testes_ARID4B: -4362, -5322      | upstream, upstream   | 1 | 28.000 | 2 | 1_Testes_ARID4B: |
| 1_Testes_ARID4B: 700, -260         | in gene, upstream    | 1 | 28.000 | 2 | 1_Testes_ARID4B: |
| 1_Testes_ARID4B: 23, 983           | in gene, in gene     | 1 | 28.000 | 2 | 1_Testes_ARID4B: |
| 1_Testes_ARID4B: 24812, 23852, 748 | downstream, downstre | 1 | 24.667 | 3 | 1_Testes_ARID4B: |
| 1_Testes_ARID4B:                   | 88 in gene           | 1 | 37.000 | 1 | 1_Testes_ARID4B: |

|                               |                     |   |        |   |                  |
|-------------------------------|---------------------|---|--------|---|------------------|
| 1_Testes_ARID4B:              | 342 in gene         | 1 | 32.000 | 1 | 1_Testes_ARID4B: |
| 1_Testes_ARID4B:              | 48 in gene          | 1 | 32.000 | 1 | 1_Testes_ARID4B: |
| 1_Testes_ARID4B:              | 727 in gene         | 1 | 18.000 | 1 | 1_Testes_ARID4B: |
| 1_Testes_ARID4B:              | 315 in gene         | 1 | 37.000 | 1 | 1_Testes_ARID4B: |
| 1_Testes_ARID4B:              | 254 in gene         | 1 | 27.000 | 1 | 1_Testes_ARID4B: |
| 1_Testes_ARID4B: 38895, 143   | downstream, in gene | 1 | 24.000 | 2 | 1_Testes_ARID4B: |
| 1_Testes_ARID4B:              | 77 in gene          | 1 | 22.000 | 1 | 1_Testes_ARID4B: |
| 1_Testes_ARID4B:              | 67 in gene          | 1 | 23.000 | 1 | 1_Testes_ARID4B: |
| 1_Testes_ARID4B:              | 419 in gene         | 1 | 25.000 | 1 | 1_Testes_ARID4B: |
| 1_Testes_ARID4B:              | -408 upstream       | 1 | 23.000 | 1 | 1_Testes_ARID4B: |
| 1_Testes_ARID4B:              | 12025 downstream    | 1 | 19.000 | 1 | 1_Testes_ARID4B: |
| 1_Testes_ARID4B: 211, 100659  | in gene, downstream | 1 | 28.000 | 2 | 1_Testes_ARID4B: |
| 1_Testes_ARID4B:              | 144 in gene         | 1 | 37.000 | 1 | 1_Testes_ARID4B: |
| 1_Testes_ARID4B:              | 550 in gene         | 1 | 18.000 | 1 | 1_Testes_ARID4B: |
| 1_Testes_ARID4B:              | 95 in gene          | 1 | 28.000 | 1 | 1_Testes_ARID4B: |
| 1_Testes_ARID4B:              | -57 upstream        | 1 | 22.000 | 1 | 1_Testes_ARID4B: |
| 1_Testes_ARID4B:              | 138 in gene         | 1 | 22.000 | 1 | 1_Testes_ARID4B: |
| 1_Testes_ARID4B:              | -2221 upstream      | 1 | 22.000 | 1 | 1_Testes_ARID4B: |
| 1_Testes_ARID4B:              | 306 in gene         | 1 | 29.000 | 1 | 1_Testes_ARID4B: |
| 1_Testes_ARID4B:              | 217 in gene         | 1 | 24.000 | 1 | 1_Testes_ARID4B: |
| 1_Testes_ARID4B:              | -86 upstream        | 1 | 32.000 | 1 | 1_Testes_ARID4B: |
| 1_Testes_ARID4B: 315, 11238   | in gene, in gene    | 1 | 27.500 | 2 | 1_Testes_ARID4B: |
| 1_Testes_ARID4B: -19, 861     | upstream, in gene   | 1 | 25.500 | 2 | 1_Testes_ARID4B: |
| 1_Testes_ARID4B:              | -59 upstream        | 1 | 17.000 | 1 | 1_Testes_ARID4B: |
| 1_Testes_ARID4B:              | 248 in gene         | 1 | 23.000 | 1 | 1_Testes_ARID4B: |
| 1_Testes_ARID4B:              | 845 in gene         | 1 | 29.000 | 1 | 1_Testes_ARID4B: |
| 1_Testes_ARID4B:              | -1448 upstream      | 1 | 29.000 | 1 | 1_Testes_ARID4B: |
| 1_Testes_ARID4B:              | 81 in gene          | 1 | 19.000 | 1 | 1_Testes_ARID4B: |
| 1_Testes_ARID4B:              | 436 in gene         | 1 | 26.000 | 1 | 1_Testes_ARID4B: |
| 1_Testes_ARID4B:              | 598 in gene         | 1 | 24.000 | 1 | 1_Testes_ARID4B: |
| 1_Testes_ARID4B: 23915, 11    | downstream, in gene | 1 | 31.000 | 2 | 1_Testes_ARID4B: |
| 1_Testes_ARID4B:              | -254 upstream       | 1 | 38.000 | 1 | 1_Testes_ARID4B: |
| 1_Testes_ARID4B:              | 675 in gene         | 1 | 23.000 | 1 | 1_Testes_ARID4B: |
| 1_Testes_ARID4B:              | 34 in gene          | 1 | 26.000 | 1 | 1_Testes_ARID4B: |
| 1_Testes_ARID4B:              | 15060 in gene       | 1 | 21.000 | 1 | 1_Testes_ARID4B: |
| 1_Testes_ARID4B:              | 439 in gene         | 1 | 21.000 | 1 | 1_Testes_ARID4B: |
| 1_Testes_ARID4B:              | 362 in gene         | 1 | 25.000 | 1 | 1_Testes_ARID4B: |
| 1_Testes_ARID4B:              | 119 in gene         | 1 | 25.000 | 1 | 1_Testes_ARID4B: |
| 1_Testes_ARID4B:              | 133 in gene         | 1 | 29.000 | 1 | 1_Testes_ARID4B: |
| 1_Testes_ARID4B:              | 20414 downstream    | 1 | 26.000 | 1 | 1_Testes_ARID4B: |
| 1_Testes_ARID4B: 139, 21851   | in gene, downstream | 1 | 30.000 | 2 | 1_Testes_ARID4B: |
| 1_Testes_ARID4B:              | 66 in gene          | 1 | 34.000 | 1 | 1_Testes_ARID4B: |
| 1_Testes_ARID4B:              | 107 in gene         | 1 | 26.000 | 1 | 1_Testes_ARID4B: |
| 1_Testes_ARID4B:              | 56477 downstream    | 1 | 26.000 | 1 | 1_Testes_ARID4B: |
| 1_Testes_ARID4B:              | -523 upstream       | 1 | 23.000 | 1 | 1_Testes_ARID4B: |
| 1_Testes_ARID4B: 44256, 46368 | in gene, in gene    | 1 | 37.000 | 2 | 1_Testes_ARID4B: |
| 1_Testes_ARID4B:              | 112 in gene         | 1 | 36.000 | 1 | 1_Testes_ARID4B: |



|                                   |                        |   |        |   |                  |
|-----------------------------------|------------------------|---|--------|---|------------------|
| 1_Testes_ARID4B:                  | -6006 upstream         | 1 | 30.000 | 1 | 1_Testes_ARID4B: |
| 1_Testes_ARID4B:                  | 808 in gene            | 1 | 30.000 | 1 | 1_Testes_ARID4B: |
| 1_Testes_ARID4B:                  | -870 upstream          | 1 | 30.000 | 1 | 1_Testes_ARID4B: |
| 1_Testes_ARID4B:1286, -426        | in gene, upstream      | 1 | 30.000 | 2 | 1_Testes_ARID4B: |
| 1_Testes_ARID4B:-1493, 219        | upstream, in gene      | 1 | 30.000 | 2 | 1_Testes_ARID4B: |
| 1_Testes_ARID4B:-59, 17269        | upstream, downstream   | 1 | 38.500 | 2 | 1_Testes_ARID4B: |
| 1_Testes_ARID4B:                  | 146 in gene            | 1 | 45.000 | 1 | 1_Testes_ARID4B: |
| 1_Testes_ARID4B:                  | -227 upstream          | 1 | 45.000 | 1 | 1_Testes_ARID4B: |
| 1_Testes_ARID4B:154, 52250        | in gene, downstream    | 1 | 24.000 | 2 | 1_Testes_ARID4B: |
| 1_Testes_ARID4B:                  | 28 in gene             | 1 | 20.000 | 1 | 1_Testes_ARID4B: |
| 1_Testes_ARID4B:54243, 131        | downstream, in gene    | 1 | 18.000 | 2 | 1_Testes_ARID4B: |
| 1_Testes_ARID4B:                  | 1608 in gene           | 1 | 24.000 | 1 | 1_Testes_ARID4B: |
| 1_Testes_ARID4B:                  | -6495 upstream         | 1 | 24.000 | 1 | 1_Testes_ARID4B: |
| 1_Testes_ARID4B:8367, -220        | in gene, upstream      | 1 | 22.000 | 2 | 1_Testes_ARID4B: |
| 1_Testes_ARID4B:-10914, -2327     | upstream, upstream     | 1 | 22.000 | 2 | 1_Testes_ARID4B: |
| 1_Testes_ARID4B:                  | 612 in gene            | 1 | 20.000 | 1 | 1_Testes_ARID4B: |
| 1_Testes_ARID4B:                  | 360 in gene            | 1 | 22.000 | 1 | 1_Testes_ARID4B: |
| 1_Testes_ARID4B:                  | -8447 upstream         | 1 | 22.000 | 1 | 1_Testes_ARID4B: |
| 1_Testes_ARID4B:                  | 55 in gene             | 1 | 24.000 | 1 | 1_Testes_ARID4B: |
| 1_Testes_ARID4B:                  | 401 in gene            | 1 | 28.000 | 1 | 1_Testes_ARID4B: |
| 1_Testes_ARID4B:                  | 15045 downstream       | 1 | 28.000 | 1 | 1_Testes_ARID4B: |
| 1_Testes_ARID4B:                  | 45684 downstream       | 1 | 23.000 | 1 | 1_Testes_ARID4B: |
| 1_Testes_ARID4B:                  | -4 upstream            | 1 | 23.000 | 1 | 1_Testes_ARID4B: |
| 1_Testes_ARID4B:                  | 477 in gene            | 1 | 23.000 | 1 | 1_Testes_ARID4B: |
| 1_Testes_ARID4B:226, -382         | in gene, upstream      | 1 | 35.000 | 2 | 1_Testes_ARID4B: |
| 1_Testes_ARID4B:                  | 1194 in gene           | 1 | 23.000 | 1 | 1_Testes_ARID4B: |
| 1_Testes_ARID4B:-2853, 23419      | upstream, downstream   | 1 | 27.500 | 2 | 1_Testes_ARID4B: |
| 1_Testes_ARID4B:                  | 167 in gene            | 1 | 32.000 | 1 | 1_Testes_ARID4B: |
| 1_Testes_ARID4B:                  | 117 in gene            | 1 | 42.000 | 1 | 1_Testes_ARID4B: |
| 1_Testes_ARID4B:                  | 3376 in gene           | 1 | 42.000 | 1 | 1_Testes_ARID4B: |
| 1_Testes_ARID4B:                  | 10605 downstream       | 1 | 42.000 | 1 | 1_Testes_ARID4B: |
| 1_Testes_ARID4B:344, -8904        | in gene, upstream      | 1 | 24.500 | 2 | 1_Testes_ARID4B: |
| 1_Testes_ARID4B:-9014, 234, 13514 | upstream, in gene, dow | 1 | 23.000 | 3 | 1_Testes_ARID4B: |
| 1_Testes_ARID4B:13380, 100        | downstream, in gene    | 1 | 21.500 | 2 | 1_Testes_ARID4B: |
| 1_Testes_ARID4B:                  | 4618 downstream        | 1 | 20.000 | 1 | 1_Testes_ARID4B: |
| 1_Testes_ARID4B:                  | -232 upstream          | 1 | 31.000 | 1 | 1_Testes_ARID4B: |
| 1_Testes_ARID4B:                  | 20 in gene             | 1 | 21.000 | 1 | 1_Testes_ARID4B: |
| 1_Testes_ARID4B:                  | 275 in gene            | 1 | 27.000 | 1 | 1_Testes_ARID4B: |
| 1_Testes_ARID4B:                  | 857 in gene            | 1 | 26.000 | 1 | 1_Testes_ARID4B: |
| 1_Testes_ARID4B:                  | 191 in gene            | 1 | 23.000 | 1 | 1_Testes_ARID4B: |
| 1_Testes_ARID4B:                  | 159 in gene            | 1 | 27.000 | 1 | 1_Testes_ARID4B: |
| 1_Testes_ARID4B:                  | 4376 downstream        | 1 | 27.000 | 1 | 1_Testes_ARID4B: |
| 1_Testes_ARID4B:                  | 20021 downstream       | 1 | 27.000 | 1 | 1_Testes_ARID4B: |
| 1_Testes_ARID4B:                  | 1417 in gene           | 1 | 17.000 | 1 | 1_Testes_ARID4B: |
| 1_Testes_ARID4B:                  | 44900 downstream       | 1 | 35.000 | 1 | 1_Testes_ARID4B: |
| 1_Testes_ARID4B:                  | 17 in gene             | 1 | 35.000 | 1 | 1_Testes_ARID4B: |
| 1_Testes_ARID4B:                  | 241 in gene            | 1 | 39.000 | 1 | 1_Testes_ARID4B: |

|                             |                     |   |        |   |                  |
|-----------------------------|---------------------|---|--------|---|------------------|
| 1_Testes_ARID4B:            | 442 in gene         | 1 | 33.000 | 1 | 1_Testes_ARID4B: |
| 1_Testes_ARID4B:            | 142 in gene         | 1 | 27.000 | 1 | 1_Testes_ARID4B: |
| 1_Testes_ARID4B:            | 88 in gene          | 1 | 19.000 | 1 | 1_Testes_ARID4B: |
| 1_Testes_ARID4B:            | 2867 in gene        | 1 | 21.000 | 1 | 1_Testes_ARID4B: |
| 1_Testes_ARID4B:            | -812 upstream       | 1 | 21.000 | 1 | 1_Testes_ARID4B: |
| 1_Testes_ARID4B:            | 310 in gene         | 1 | 40.000 | 1 | 1_Testes_ARID4B: |
| 1_Testes_ARID4B:            | -458 upstream       | 1 | 40.000 | 1 | 1_Testes_ARID4B: |
| 1_Testes_ARID4B:            | -313 upstream       | 1 | 34.000 | 1 | 1_Testes_ARID4B: |
| 1_Testes_ARID4B:            | 178 in gene         | 1 | 22.000 | 1 | 1_Testes_ARID4B: |
| 1_Testes_ARID4B:            | 257 in gene         | 1 | 21.000 | 1 | 1_Testes_ARID4B: |
| 1_Testes_ARID4B:            | 212 in gene         | 1 | 30.000 | 1 | 1_Testes_ARID4B: |
| 1_Testes_ARID4B:            | 402 in gene         | 1 | 18.000 | 1 | 1_Testes_ARID4B: |
| 1_Testes_ARID4B:            | 247 in gene         | 1 | 34.000 | 1 | 1_Testes_ARID4B: |
| 1_Testes_ARID4B:            | 213 in gene         | 1 | 27.000 | 1 | 1_Testes_ARID4B: |
| 1_Testes_ARID4B:            | 395 in gene         | 1 | 24.000 | 1 | 1_Testes_ARID4B: |
| 1_Testes_ARID4B: 458, 19034 | in gene, downstream | 1 | 21.000 | 2 | 1_Testes_ARID4B: |
| 1_Testes_ARID4B:            | 102 in gene         | 1 | 21.000 | 1 | 1_Testes_ARID4B: |
| 1_Testes_ARID4B:            | 382 in gene         | 1 | 33.000 | 1 | 1_Testes_ARID4B: |
| 1_Testes_ARID4B:            | 150 in gene         | 1 | 19.000 | 1 | 1_Testes_ARID4B: |
| 1_Testes_ARID4B:            | -67 upstream        | 1 | 30.000 | 1 | 1_Testes_ARID4B: |
| 1_Testes_ARID4B:            | 90611 in gene       | 1 | 19.000 | 1 | 1_Testes_ARID4B: |
| 1_Testes_ARID4B:            | 987 in gene         | 1 | 19.000 | 1 | 1_Testes_ARID4B: |
| 1_Testes_ARID4B:            | 182 in gene         | 1 | 27.000 | 1 | 1_Testes_ARID4B: |
| 1_Testes_ARID4B:            | 583 in gene         | 1 | 27.000 | 1 | 1_Testes_ARID4B: |
| 1_Testes_ARID4B:            | 53051 downstream    | 1 | 27.000 | 1 | 1_Testes_ARID4B: |
| 1_Testes_ARID4B:            | 80 in gene          | 1 | 19.000 | 1 | 1_Testes_ARID4B: |
| 1_Testes_ARID4B:            | 19250 downstream    | 1 | 37.000 | 1 | 1_Testes_ARID4B: |
| 1_Testes_ARID4B:            | 140 in gene         | 1 | 37.000 | 1 | 1_Testes_ARID4B: |
| 1_Testes_ARID4B:            | 41533 downstream    | 1 | 37.000 | 1 | 1_Testes_ARID4B: |
| 1_Testes_ARID4B:            | -778 upstream       | 1 | 27.000 | 1 | 1_Testes_ARID4B: |
| 1_Testes_ARID4B:            | 88 in gene          | 1 | 27.000 | 1 | 1_Testes_ARID4B: |
| 1_Testes_ARID4B:            | 306 in gene         | 1 | 32.000 | 1 | 1_Testes_ARID4B: |
| 1_Testes_ARID4B:            | 272 in gene         | 1 | 25.000 | 1 | 1_Testes_ARID4B: |
| 1_Testes_ARID4B: -716, 676  | upstream, in gene   | 1 | 26.000 | 2 | 1_Testes_ARID4B: |
| 1_Testes_ARID4B:            | 54899 downstream    | 1 | 28.000 | 1 | 1_Testes_ARID4B: |
| 1_Testes_ARID4B:            | 561 in gene         | 1 | 28.000 | 1 | 1_Testes_ARID4B: |
| 1_Testes_ARID4B:            | -935 upstream       | 1 | 17.000 | 1 | 1_Testes_ARID4B: |
| 1_Testes_ARID4B:            | 230 in gene         | 1 | 37.000 | 1 | 1_Testes_ARID4B: |
| 1_Testes_ARID4B:            | 9706 in gene        | 1 | 31.000 | 1 | 1_Testes_ARID4B: |
| 1_Testes_ARID4B:            | 417 in gene         | 1 | 35.000 | 1 | 1_Testes_ARID4B: |
| 1_Testes_ARID4B:            | 49331 in gene       | 1 | 28.000 | 1 | 1_Testes_ARID4B: |
| 1_Testes_ARID4B:            | -105 upstream       | 1 | 28.000 | 1 | 1_Testes_ARID4B: |
| 1_Testes_ARID4B:            | -7322 upstream      | 1 | 24.000 | 1 | 1_Testes_ARID4B: |
| 1_Testes_ARID4B:            | 261 in gene         | 1 | 24.000 | 1 | 1_Testes_ARID4B: |
| 1_Testes_ARID4B:            | 679 in gene         | 1 | 34.000 | 1 | 1_Testes_ARID4B: |
| 1_Testes_ARID4B:            | 387 in gene         | 1 | 34.000 | 1 | 1_Testes_ARID4B: |
| 1_Testes_ARID4B: 1134, 110  | in gene, in gene    | 1 | 29.500 | 2 | 1_Testes_ARID4B: |

|                             |                     |   |        |   |                  |
|-----------------------------|---------------------|---|--------|---|------------------|
| 1_Testes_ARID4B:            | 879 in gene         | 1 | 34.000 | 1 | 1_Testes_ARID4B: |
| 1_Testes_ARID4B:            | 101 in gene         | 1 | 23.000 | 1 | 1_Testes_ARID4B: |
| 1_Testes_ARID4B: 111, -566  | in gene, upstream   | 1 | 17.500 | 2 | 1_Testes_ARID4B: |
| 1_Testes_ARID4B: -670, 7    | upstream, in gene   | 1 | 17.500 | 2 | 1_Testes_ARID4B: |
| 1_Testes_ARID4B:            | 579 in gene         | 1 | 19.000 | 1 | 1_Testes_ARID4B: |
| 1_Testes_ARID4B:            | 159 in gene         | 1 | 28.000 | 1 | 1_Testes_ARID4B: |
| 1_Testes_ARID4B:            | 68 in gene          | 1 | 28.000 | 1 | 1_Testes_ARID4B: |
| 1_Testes_ARID4B:            | -243 upstream       | 1 | 28.000 | 1 | 1_Testes_ARID4B: |
| 1_Testes_ARID4B:            | -311 upstream       | 1 | 18.000 | 1 | 1_Testes_ARID4B: |
| 1_Testes_ARID4B:            | 124 in gene         | 1 | 18.000 | 1 | 1_Testes_ARID4B: |
| 1_Testes_ARID4B: 403157, 85 | in gene, in gene    | 1 | 23.000 | 2 | 1_Testes_ARID4B: |
| 1_Testes_ARID4B:            | -1966 upstream      | 1 | 19.000 | 1 | 1_Testes_ARID4B: |
| 1_Testes_ARID4B:            | 59 in gene          | 1 | 18.000 | 1 | 1_Testes_ARID4B: |
| 1_Testes_ARID4B:            | 397 in gene         | 1 | 28.000 | 1 | 1_Testes_ARID4B: |
| 1_Testes_ARID4B:            | 1047 in gene        | 1 | 44.000 | 1 | 1_Testes_ARID4B: |
| 1_Testes_ARID4B:            | 412 in gene         | 1 | 35.000 | 1 | 1_Testes_ARID4B: |
| 1_Testes_ARID4B:            | -349 upstream       | 1 | 35.000 | 1 | 1_Testes_ARID4B: |
| 1_Testes_ARID4B:            | 238 in gene         | 1 | 24.000 | 1 | 1_Testes_ARID4B: |
| 1_Testes_ARID4B:            | 324 in gene         | 1 | 22.000 | 1 | 1_Testes_ARID4B: |
| 1_Testes_ARID4B:            | -525 upstream       | 1 | 22.000 | 1 | 1_Testes_ARID4B: |
| 1_Testes_ARID4B:            | -962 upstream       | 1 | 31.000 | 1 | 1_Testes_ARID4B: |
| 1_Testes_ARID4B:            | 28466 in gene       | 1 | 23.000 | 1 | 1_Testes_ARID4B: |
| 1_Testes_ARID4B:            | 21 in gene          | 1 | 19.000 | 1 | 1_Testes_ARID4B: |
| 1_Testes_ARID4B:            | 165 in gene         | 1 | 29.000 | 1 | 1_Testes_ARID4B: |
| 1_Testes_ARID4B:            | 935 in gene         | 1 | 26.000 | 1 | 1_Testes_ARID4B: |
| 1_Testes_ARID4B:            | 192 in gene         | 1 | 20.000 | 1 | 1_Testes_ARID4B: |
| 1_Testes_ARID4B:            | 153 in gene         | 1 | 25.000 | 1 | 1_Testes_ARID4B: |
| 1_Testes_ARID4B:            | 145 in gene         | 1 | 31.000 | 1 | 1_Testes_ARID4B: |
| 1_Testes_ARID4B:            | 9 in gene           | 1 | 24.000 | 1 | 1_Testes_ARID4B: |
| 1_Testes_ARID4B:            | 1350 in gene        | 1 | 37.000 | 1 | 1_Testes_ARID4B: |
| 1_Testes_ARID4B:            | -383 upstream       | 1 | 37.000 | 1 | 1_Testes_ARID4B: |
| 1_Testes_ARID4B: -7177, -84 | upstream, upstream  | 1 | 21.000 | 2 | 1_Testes_ARID4B: |
| 1_Testes_ARID4B:            | 305 in gene         | 1 | 38.000 | 1 | 1_Testes_ARID4B: |
| 1_Testes_ARID4B:            | 355 in gene         | 1 | 20.000 | 1 | 1_Testes_ARID4B: |
| 1_Testes_ARID4B:            | 602980 in gene      | 1 | 19.000 | 1 | 1_Testes_ARID4B: |
| 1_Testes_ARID4B:            | 430398 in gene      | 1 | 19.000 | 1 | 1_Testes_ARID4B: |
| 1_Testes_ARID4B:            | 398 in gene         | 1 | 26.000 | 1 | 1_Testes_ARID4B: |
| 1_Testes_ARID4B:            | -614 upstream       | 1 | 35.000 | 1 | 1_Testes_ARID4B: |
| 1_Testes_ARID4B: 212, 39396 | in gene, downstream | 1 | 30.000 | 2 | 1_Testes_ARID4B: |
| 1_Testes_ARID4B:            | -4588 upstream      | 1 | 35.000 | 1 | 1_Testes_ARID4B: |
| 1_Testes_ARID4B:            | -4718 upstream      | 1 | 35.000 | 1 | 1_Testes_ARID4B: |
| 1_Testes_ARID4B:            | 374 in gene         | 1 | 25.000 | 1 | 1_Testes_ARID4B: |
| 1_Testes_ARID4B:            | 116 in gene         | 1 | 33.000 | 1 | 1_Testes_ARID4B: |
| 1_Testes_ARID4B:            | -4257 upstream      | 1 | 33.000 | 1 | 1_Testes_ARID4B: |
| 1_Testes_ARID4B:            | -310 upstream       | 1 | 27.000 | 1 | 1_Testes_ARID4B: |
| 1_Testes_ARID4B:            | 313 in gene         | 1 | 27.000 | 1 | 1_Testes_ARID4B: |
| 1_Testes_ARID4B:            | 255 in gene         | 1 | 25.000 | 1 | 1_Testes_ARID4B: |

|                                         |                         |          |                    |
|-----------------------------------------|-------------------------|----------|--------------------|
| 1_Testes_ARID4B:                        | 223 in gene             | 1 18.000 | 1 1_Testes_ARID4B: |
| 1_Testes_ARID4B:                        | -736 upstream           | 1 18.000 | 1 1_Testes_ARID4B: |
| 1_Testes_ARID4B:                        | 195 in gene             | 1 25.000 | 1 1_Testes_ARID4B: |
| 1_Testes_ARID4B:                        | 512 in gene             | 1 29.000 | 1 1_Testes_ARID4B: |
| 1_Testes_ARID4B:                        | -305 upstream           | 1 22.000 | 1 1_Testes_ARID4B: |
| 1_Testes_ARID4B:                        | 161 in gene             | 1 27.000 | 1 1_Testes_ARID4B: |
| 1_Testes_ARID4B:                        | 919 in gene             | 1 21.000 | 1 1_Testes_ARID4B: |
| 1_Testes_ARID4B:                        | 3871 in gene            | 1 27.000 | 1 1_Testes_ARID4B: |
| 1_Testes_ARID4B:                        | -537 upstream           | 1 26.000 | 1 1_Testes_ARID4B: |
| 1_Testes_ARID4B:                        | 140 in gene             | 1 38.000 | 1 1_Testes_ARID4B: |
| 1_Testes_ARID4B:                        | -3670 upstream          | 1 38.000 | 1 1_Testes_ARID4B: |
| 1_Testes_ARID4B:                        | -1841 upstream          | 1 38.000 | 1 1_Testes_ARID4B: |
| 1_Testes_ARID4B:                        | -306 upstream           | 1 24.000 | 1 1_Testes_ARID4B: |
| 1_Testes_ARID4B:                        | 1044 in gene            | 1 19.000 | 1 1_Testes_ARID4B: |
| 1_Testes_ARID4B:                        | 246 in gene             | 1 25.000 | 1 1_Testes_ARID4B: |
| 1_Testes_ARID4B:                        | -1503 upstream          | 1 19.000 | 1 1_Testes_ARID4B: |
| 1_Testes_ARID4B:                        | 463 in gene             | 1 19.000 | 1 1_Testes_ARID4B: |
| 1_Testes_ARID4B:                        | 399 in gene             | 1 28.000 | 1 1_Testes_ARID4B: |
| 1_Testes_ARID4B:                        | 10600 downstream        | 1 22.000 | 1 1_Testes_ARID4B: |
| 1_Testes_ARID4B:                        | 51 in gene              | 1 22.000 | 1 1_Testes_ARID4B: |
| 1_Testes_ARID4B:                        | -170 upstream           | 1 22.000 | 1 1_Testes_ARID4B: |
| 1_Testes_ARID4B:                        | 731 in gene             | 1 23.000 | 1 1_Testes_ARID4B: |
| 1_Testes_ARID4B:                        | 484 in gene             | 1 21.000 | 1 1_Testes_ARID4B: |
| 1_Testes_ARID4B:                        | 3959 in gene            | 1 18.000 | 1 1_Testes_ARID4B: |
| 1_Testes_ARID4B: -7233, 12447           | upstream, downstream    | 1 22.500 | 2 1_Testes_ARID4B: |
| 1_Testes_ARID4B: 124, 15324             | in gene, downstream     | 1 27.500 | 2 1_Testes_ARID4B: |
| 1_Testes_ARID4B:                        | 63 in gene              | 1 28.000 | 1 1_Testes_ARID4B: |
| 1_Testes_ARID4B:                        | -3776 upstream          | 1 24.000 | 1 1_Testes_ARID4B: |
| 1_Testes_ARID4B:                        | 29 in gene              | 1 24.000 | 1 1_Testes_ARID4B: |
| 1_Testes_ARID4B:                        | -3418 upstream          | 1 38.000 | 1 1_Testes_ARID4B: |
| 1_Testes_ARID4B:                        | 421 in gene             | 1 38.000 | 1 1_Testes_ARID4B: |
| 1_Testes_ARID4B:                        | 11756 downstream        | 1 18.000 | 1 1_Testes_ARID4B: |
| 1_Testes_ARID4B:                        | 417 in gene             | 1 22.000 | 1 1_Testes_ARID4B: |
| 1_Testes_ARID4B:                        | 15240 downstream        | 1 22.000 | 1 1_Testes_ARID4B: |
| 1_Testes_ARID4B: 20772, 308             | in gene, in gene        | 1 23.500 | 2 1_Testes_ARID4B: |
| 1_Testes_ARID4B: -683, 437, 4234        | upstream, in gene, in g | 1 24.000 | 3 1_Testes_ARID4B: |
| 1_Testes_ARID4B: 4670, 3550, -247       | downstream, downstre    | 1 24.000 | 3 1_Testes_ARID4B: |
| 1_Testes_ARID4B: 16567, 15447, 11650, - | downstream, downstre    | 1 25.000 | 4 1_Testes_ARID4B: |
| 1_Testes_ARID4B:                        | -1281 upstream          | 1 28.000 | 1 1_Testes_ARID4B: |
| 1_Testes_ARID4B:                        | 492 in gene             | 1 28.000 | 1 1_Testes_ARID4B: |
| 1_Testes_ARID4B:                        | 5009 in gene            | 1 23.000 | 1 1_Testes_ARID4B: |
| 1_Testes_ARID4B:                        | 238 in gene             | 1 29.000 | 1 1_Testes_ARID4B: |
| 1_Testes_ARID4B:                        | -566 upstream           | 1 26.000 | 1 1_Testes_ARID4B: |
| 1_Testes_ARID4B:                        | 124908 downstream       | 1 26.000 | 1 1_Testes_ARID4B: |
| 1_Testes_ARID4B:                        | 2643 in gene            | 1 26.000 | 1 1_Testes_ARID4B: |
| 1_Testes_ARID4B:                        | 11247 downstream        | 1 26.000 | 1 1_Testes_ARID4B: |
| 1_Testes_ARID4B: 12955, 18779           | downstream, downstre    | 1 22.000 | 2 1_Testes_ARID4B: |

|                                    |                         |   |        |   |                  |
|------------------------------------|-------------------------|---|--------|---|------------------|
| 1_Testes_ARID4B: 275, 6099         | in gene, downstream     | 1 | 22.000 | 2 | 1_Testes_ARID4B: |
| 1_Testes_ARID4B: -5465, 359        | upstream, in gene       | 1 | 22.000 | 2 | 1_Testes_ARID4B: |
| 1_Testes_ARID4B:                   | 11152 downstream        | 1 | 31.000 | 1 | 1_Testes_ARID4B: |
| 1_Testes_ARID4B:                   | 255 in gene             | 1 | 31.000 | 1 | 1_Testes_ARID4B: |
| 1_Testes_ARID4B:                   | -1107 upstream          | 1 | 31.000 | 1 | 1_Testes_ARID4B: |
| 1_Testes_ARID4B:                   | 344 in gene             | 1 | 25.000 | 1 | 1_Testes_ARID4B: |
| 1_Testes_ARID4B:                   | 3674 downstream         | 1 | 25.000 | 1 | 1_Testes_ARID4B: |
| 1_Testes_ARID4B: 14055, -41        | downstream, upstream    | 1 | 26.000 | 2 | 1_Testes_ARID4B: |
| 1_Testes_ARID4B:                   | 1151 in gene            | 1 | 24.000 | 1 | 1_Testes_ARID4B: |
| 1_Testes_ARID4B:                   | 6289 downstream         | 1 | 24.000 | 1 | 1_Testes_ARID4B: |
| 1_Testes_ARID4B:                   | 188 in gene             | 1 | 24.000 | 1 | 1_Testes_ARID4B: |
| 1_Testes_ARID4B:                   | -10 upstream            | 1 | 24.000 | 1 | 1_Testes_ARID4B: |
| 1_Testes_ARID4B:                   | 12170 downstream        | 1 | 24.000 | 1 | 1_Testes_ARID4B: |
| 1_Testes_ARID4B:                   | 835 in gene             | 1 | 17.000 | 1 | 1_Testes_ARID4B: |
| 1_Testes_ARID4B:                   | 504 in gene             | 1 | 17.000 | 1 | 1_Testes_ARID4B: |
| 1_Testes_ARID4B:                   | 10282 downstream        | 1 | 17.000 | 1 | 1_Testes_ARID4B: |
| 1_Testes_ARID4B:                   | 11913 downstream        | 1 | 33.000 | 1 | 1_Testes_ARID4B: |
| 1_Testes_ARID4B:                   | -373 upstream           | 1 | 33.000 | 1 | 1_Testes_ARID4B: |
| 1_Testes_ARID4B:                   | -6240 upstream          | 1 | 33.000 | 1 | 1_Testes_ARID4B: |
| 1_Testes_ARID4B:                   | 572 in gene             | 1 | 20.000 | 1 | 1_Testes_ARID4B: |
| 1_Testes_ARID4B:                   | 146 in gene             | 1 | 22.000 | 1 | 1_Testes_ARID4B: |
| 1_Testes_ARID4B: 232, -8616, -9320 | in gene, upstream, upst | 1 | 26.333 | 3 | 1_Testes_ARID4B: |
| 1_Testes_ARID4B: -9209, -361, 343  | upstream, upstream, in  | 1 | 26.333 | 3 | 1_Testes_ARID4B: |
| 1_Testes_ARID4B:                   | 438 in gene             | 1 | 17.000 | 1 | 1_Testes_ARID4B: |
| 1_Testes_ARID4B:                   | 282 in gene             | 1 | 25.000 | 1 | 1_Testes_ARID4B: |
| 1_Testes_ARID4B:                   | 22020 in gene           | 1 | 19.000 | 1 | 1_Testes_ARID4B: |
| 1_Testes_ARID4B:                   | 9820 downstream         | 1 | 34.000 | 1 | 1_Testes_ARID4B: |
| 1_Testes_ARID4B:                   | 7189 in gene            | 1 | 34.000 | 1 | 1_Testes_ARID4B: |
| 1_Testes_ARID4B:                   | 11463 downstream        | 1 | 27.000 | 1 | 1_Testes_ARID4B: |
| 1_Testes_ARID4B:                   | -790 upstream           | 1 | 27.000 | 1 | 1_Testes_ARID4B: |
| 1_Testes_ARID4B:                   | 423 in gene             | 1 | 37.000 | 1 | 1_Testes_ARID4B: |
| 1_Testes_ARID4B:                   | 44132 downstream        | 1 | 37.000 | 1 | 1_Testes_ARID4B: |
| 1_Testes_ARID4B:                   | 362 in gene             | 1 | 35.000 | 1 | 1_Testes_ARID4B: |
| 1_Testes_ARID4B:                   | 14743 downstream        | 1 | 38.000 | 1 | 1_Testes_ARID4B: |
| 1_Testes_ARID4B:                   | 69 in gene              | 1 | 38.000 | 1 | 1_Testes_ARID4B: |
| 1_Testes_ARID4B: 18499, 387        | downstream, in gene     | 1 | 31.000 | 2 | 1_Testes_ARID4B: |
| 1_Testes_ARID4B:                   | 5274 downstream         | 1 | 24.000 | 1 | 1_Testes_ARID4B: |
| 1_Testes_ARID4B:                   | -5379 upstream          | 1 | 24.000 | 1 | 1_Testes_ARID4B: |
| 1_Testes_ARID4B:                   | 1236 in gene            | 1 | 20.000 | 1 | 1_Testes_ARID4B: |
| 1_Testes_ARID4B:                   | -9146 upstream          | 1 | 20.000 | 1 | 1_Testes_ARID4B: |
| 1_Testes_ARID4B:                   | 366 in gene             | 1 | 27.000 | 1 | 1_Testes_ARID4B: |
| 1_Testes_ARID4B:                   | 49153 downstream        | 1 | 25.000 | 1 | 1_Testes_ARID4B: |
| 1_Testes_ARID4B:                   | 238 in gene             | 1 | 25.000 | 1 | 1_Testes_ARID4B: |
| 1_Testes_ARID4B:                   | 341 in gene             | 1 | 30.000 | 1 | 1_Testes_ARID4B: |
| 1_Testes_ARID4B: 394, -4150        | in gene, upstream       | 1 | 17.500 | 2 | 1_Testes_ARID4B: |
| 1_Testes_ARID4B: -4578, -34        | upstream, upstream      | 1 | 17.500 | 2 | 1_Testes_ARID4B: |
| 1_Testes_ARID4B: -3030, 5690, 8554 | upstream, in gene, in g | 1 | 23.333 | 3 | 1_Testes_ARID4B: |

|                  |                                            |   |        |   |                  |
|------------------|--------------------------------------------|---|--------|---|------------------|
| 1_Testes_ARID4B: | 45014 downstream                           | 1 | 23.000 | 1 | 1_Testes_ARID4B: |
| 1_Testes_ARID4B: | 69 in gene                                 | 1 | 32.000 | 1 | 1_Testes_ARID4B: |
| 1_Testes_ARID4B: | -172 upstream                              | 1 | 32.000 | 1 | 1_Testes_ARID4B: |
| 1_Testes_ARID4B: | 12501 downstream                           | 1 | 32.000 | 1 | 1_Testes_ARID4B: |
| 1_Testes_ARID4B: | -8168 upstream                             | 1 | 25.000 | 1 | 1_Testes_ARID4B: |
| 1_Testes_ARID4B: | -227 upstream                              | 1 | 25.000 | 1 | 1_Testes_ARID4B: |
| 1_Testes_ARID4B: | 92 in gene                                 | 1 | 25.000 | 1 | 1_Testes_ARID4B: |
| 1_Testes_ARID4B: | 41858 downstream                           | 1 | 25.000 | 1 | 1_Testes_ARID4B: |
| 1_Testes_ARID4B: | 7211 downstream                            | 1 | 27.000 | 1 | 1_Testes_ARID4B: |
| 1_Testes_ARID4B: | 170 in gene                                | 1 | 27.000 | 1 | 1_Testes_ARID4B: |
| 1_Testes_ARID4B: | 639 in gene                                | 1 | 37.000 | 1 | 1_Testes_ARID4B: |
| 1_Testes_ARID4B: | 631 in gene                                | 1 | 20.000 | 1 | 1_Testes_ARID4B: |
| 1_Testes_ARID4B: | 10650 downstream                           | 1 | 22.000 | 1 | 1_Testes_ARID4B: |
| 1_Testes_ARID4B: | -321 upstream                              | 1 | 22.000 | 1 | 1_Testes_ARID4B: |
| 1_Testes_ARID4B: | 62295 downstream                           | 1 | 22.000 | 1 | 1_Testes_ARID4B: |
| 1_Testes_ARID4B: | 177 in gene                                | 1 | 27.000 | 1 | 1_Testes_ARID4B: |
| 1_Testes_ARID4B: | 372 in gene                                | 1 | 21.000 | 1 | 1_Testes_ARID4B: |
| 1_Testes_ARID4B: | 556 downstream                             | 1 | 21.000 | 1 | 1_Testes_ARID4B: |
| 1_Testes_ARID4B: | -833 upstream                              | 1 | 21.000 | 1 | 1_Testes_ARID4B: |
| 1_Testes_ARID4B: | 7105 in gene                               | 1 | 23.000 | 1 | 1_Testes_ARID4B: |
| 1_Testes_ARID4B: | 1739 in gene                               | 1 | 23.000 | 1 | 1_Testes_ARID4B: |
| 1_Testes_ARID4B: | 34675 downstream                           | 1 | 38.000 | 1 | 1_Testes_ARID4B: |
| 1_Testes_ARID4B: | 5880 downstream                            | 1 | 38.000 | 1 | 1_Testes_ARID4B: |
| 1_Testes_ARID4B: | 451 in gene                                | 1 | 38.000 | 1 | 1_Testes_ARID4B: |
| 1_Testes_ARID4B: | -9776 upstream                             | 1 | 38.000 | 1 | 1_Testes_ARID4B: |
| 1_Testes_ARID4B: | 26413 downstream                           | 1 | 23.000 | 1 | 1_Testes_ARID4B: |
| 1_Testes_ARID4B: | 169 in gene                                | 1 | 23.000 | 1 | 1_Testes_ARID4B: |
| 1_Testes_ARID4B: | 12016 downstream                           | 1 | 23.000 | 1 | 1_Testes_ARID4B: |
| 1_Testes_ARID4B: | -433 upstream                              | 1 | 25.000 | 1 | 1_Testes_ARID4B: |
| 1_Testes_ARID4B: | 261 in gene                                | 1 | 25.000 | 1 | 1_Testes_ARID4B: |
| 1_Testes_ARID4B: | 274 in gene                                | 1 | 22.000 | 1 | 1_Testes_ARID4B: |
| 1_Testes_ARID4B: | 279 in gene                                | 1 | 21.000 | 1 | 1_Testes_ARID4B: |
| 1_Testes_ARID4B: | 46 in gene                                 | 1 | 20.000 | 1 | 1_Testes_ARID4B: |
| 1_Testes_ARID4B: | 120995 in gene                             | 1 | 26.000 | 1 | 1_Testes_ARID4B: |
| 1_Testes_ARID4B: | 149 in gene                                | 1 | 29.000 | 1 | 1_Testes_ARID4B: |
| 1_Testes_ARID4B: | 254 in gene                                | 1 | 30.000 | 1 | 1_Testes_ARID4B: |
| 1_Testes_ARID4B: | 143, 45146, 45775 in gene, in gene, in gen | 1 | 22.333 | 3 | 1_Testes_ARID4B: |
| 1_Testes_ARID4B: | 94 in gene                                 | 1 | 20.000 | 1 | 1_Testes_ARID4B: |
| 1_Testes_ARID4B: | 99 in gene                                 | 1 | 27.000 | 1 | 1_Testes_ARID4B: |
| 1_Testes_ARID4B: | -214 upstream                              | 1 | 27.000 | 1 | 1_Testes_ARID4B: |
| 1_Testes_ARID4B: | 716 in gene                                | 1 | 18.000 | 1 | 1_Testes_ARID4B: |
| 1_Testes_ARID4B: | -921 upstream                              | 1 | 18.000 | 1 | 1_Testes_ARID4B: |
| 1_Testes_ARID4B: | 129 in gene                                | 1 | 27.000 | 1 | 1_Testes_ARID4B: |
| 1_Testes_ARID4B: | 390 in gene                                | 1 | 22.000 | 1 | 1_Testes_ARID4B: |
| 1_Testes_ARID4B: | 451 in gene                                | 1 | 32.000 | 1 | 1_Testes_ARID4B: |
| 1_Testes_ARID4B: | 202 in gene                                | 1 | 25.000 | 1 | 1_Testes_ARID4B: |
| 1_Testes_ARID4B: | 581 in gene                                | 1 | 21.000 | 1 | 1_Testes_ARID4B: |

|                              |                      |   |        |   |                  |
|------------------------------|----------------------|---|--------|---|------------------|
| 1_Testes_ARID4B:             | 36 in gene           | 1 | 34.000 | 1 | 1_Testes_ARID4B: |
| 1_Testes_ARID4B:             | 28706 downstream     | 1 | 28.000 | 1 | 1_Testes_ARID4B: |
| 1_Testes_ARID4B:             | 1091 in gene         | 1 | 27.000 | 1 | 1_Testes_ARID4B: |
| 1_Testes_ARID4B:             | 395 in gene          | 1 | 19.000 | 1 | 1_Testes_ARID4B: |
| 1_Testes_ARID4B: 18507, 203  | downstream, in gene  | 1 | 20.000 | 2 | 1_Testes_ARID4B: |
| 1_Testes_ARID4B:             | 6055 downstream      | 1 | 21.000 | 1 | 1_Testes_ARID4B: |
| 1_Testes_ARID4B:             | -333 upstream        | 1 | 21.000 | 1 | 1_Testes_ARID4B: |
| 1_Testes_ARID4B:             | 54652 downstream     | 1 | 33.000 | 1 | 1_Testes_ARID4B: |
| 1_Testes_ARID4B: 824, 54360  | in gene, downstream  | 1 | 34.000 | 2 | 1_Testes_ARID4B: |
| 1_Testes_ARID4B:             | -164 upstream        | 1 | 35.000 | 1 | 1_Testes_ARID4B: |
| 1_Testes_ARID4B:             | 370 in gene          | 1 | 35.000 | 1 | 1_Testes_ARID4B: |
| 1_Testes_ARID4B:             | 694 in gene          | 1 | 24.000 | 1 | 1_Testes_ARID4B: |
| 1_Testes_ARID4B:             | 336 in gene          | 1 | 28.000 | 1 | 1_Testes_ARID4B: |
| 1_Testes_ARID4B:             | 212 in gene          | 1 | 25.000 | 1 | 1_Testes_ARID4B: |
| 1_Testes_ARID4B:             | 8096 downstream      | 1 | 19.000 | 1 | 1_Testes_ARID4B: |
| 1_Testes_ARID4B:             | 118 in gene          | 1 | 19.000 | 1 | 1_Testes_ARID4B: |
| 1_Testes_ARID4B: 29411, 483  | downstream, in gene  | 1 | 25.000 | 2 | 1_Testes_ARID4B: |
| 1_Testes_ARID4B: 46425, -679 | downstream, upstream | 1 | 29.000 | 2 | 1_Testes_ARID4B: |
| 1_Testes_ARID4B:             | 678 in gene          | 1 | 27.000 | 1 | 1_Testes_ARID4B: |
| 1_Testes_ARID4B:             | 280 in gene          | 1 | 19.000 | 1 | 1_Testes_ARID4B: |
| 1_Testes_ARID4B:             | 475 in gene          | 1 | 21.000 | 1 | 1_Testes_ARID4B: |
| 1_Testes_ARID4B:             | 150 in gene          | 1 | 21.000 | 1 | 1_Testes_ARID4B: |
| 1_Testes_ARID4B:             | 323 in gene          | 1 | 38.000 | 1 | 1_Testes_ARID4B: |
| 1_Testes_ARID4B:             | 337 in gene          | 1 | 21.000 | 1 | 1_Testes_ARID4B: |
| 1_Testes_ARID4B:             | -403 upstream        | 1 | 21.000 | 1 | 1_Testes_ARID4B: |
| 1_Testes_ARID4B:             | 446 in gene          | 1 | 19.000 | 1 | 1_Testes_ARID4B: |
| 1_Testes_ARID4B:             | -2896 upstream       | 1 | 19.000 | 1 | 1_Testes_ARID4B: |
| 1_Testes_ARID4B:             | 214 in gene          | 1 | 31.000 | 1 | 1_Testes_ARID4B: |
| 1_Testes_ARID4B:             | -1102 upstream       | 1 | 22.000 | 1 | 1_Testes_ARID4B: |
| 1_Testes_ARID4B:             | 58018 downstream     | 1 | 22.000 | 1 | 1_Testes_ARID4B: |
| 1_Testes_ARID4B:             | 222 in gene          | 1 | 29.000 | 1 | 1_Testes_ARID4B: |
| 1_Testes_ARID4B:             | 341 in gene          | 1 | 22.000 | 1 | 1_Testes_ARID4B: |
| 1_Testes_ARID4B:             | -29 upstream         | 1 | 34.000 | 1 | 1_Testes_ARID4B: |
| 1_Testes_ARID4B:             | -6412 upstream       | 1 | 34.000 | 1 | 1_Testes_ARID4B: |
| 1_Testes_ARID4B:             | 16784 downstream     | 1 | 26.000 | 1 | 1_Testes_ARID4B: |
| 1_Testes_ARID4B:             | 34 in gene           | 1 | 26.000 | 1 | 1_Testes_ARID4B: |
| 1_Testes_ARID4B:             | 8098 downstream      | 1 | 26.000 | 1 | 1_Testes_ARID4B: |
| 1_Testes_ARID4B:             | 19778 downstream     | 1 | 28.000 | 1 | 1_Testes_ARID4B: |
| 1_Testes_ARID4B: 199, 62770  | in gene, downstream  | 1 | 28.000 | 2 | 1_Testes_ARID4B: |
| 1_Testes_ARID4B:             | 135 in gene          | 1 | 28.000 | 1 | 1_Testes_ARID4B: |
| 1_Testes_ARID4B:             | 166 in gene          | 1 | 32.000 | 1 | 1_Testes_ARID4B: |
| 1_Testes_ARID4B:             | 376 in gene          | 1 | 32.000 | 1 | 1_Testes_ARID4B: |
| 1_Testes_ARID4B:             | 1160 in gene         | 1 | 18.000 | 1 | 1_Testes_ARID4B: |
| 1_Testes_ARID4B:             | 12 in gene           | 1 | 18.000 | 1 | 1_Testes_ARID4B: |
| 1_Testes_ARID4B:             | 423 in gene          | 1 | 25.000 | 1 | 1_Testes_ARID4B: |
| 1_Testes_ARID4B:             | 357 in gene          | 1 | 22.000 | 1 | 1_Testes_ARID4B: |
| 1_Testes_ARID4B:             | 342 in gene          | 1 | 47.000 | 1 | 1_Testes_ARID4B: |

|                             |                     |   |        |   |                  |
|-----------------------------|---------------------|---|--------|---|------------------|
| 1_Testes_ARID4B:            | -306 upstream       | 1 | 21.000 | 1 | 1_Testes_ARID4B: |
| 1_Testes_ARID4B:            | 263 in gene         | 1 | 21.000 | 1 | 1_Testes_ARID4B: |
| 1_Testes_ARID4B:            | 1292 in gene        | 1 | 21.000 | 1 | 1_Testes_ARID4B: |
| 1_Testes_ARID4B:            | 304 in gene         | 1 | 34.000 | 1 | 1_Testes_ARID4B: |
| 1_Testes_ARID4B:            | 19579 in gene       | 1 | 26.000 | 1 | 1_Testes_ARID4B: |
| 1_Testes_ARID4B:            | 0 in gene           | 1 | 26.000 | 1 | 1_Testes_ARID4B: |
| 1_Testes_ARID4B:            | 341 in gene         | 1 | 25.000 | 1 | 1_Testes_ARID4B: |
| 1_Testes_ARID4B: 49944, 472 | downstream, in gene | 1 | 23.000 | 2 | 1_Testes_ARID4B: |
| 1_Testes_ARID4B:            | 371 in gene         | 1 | 27.000 | 1 | 1_Testes_ARID4B: |
| 1_Testes_ARID4B:            | 175 in gene         | 1 | 30.000 | 1 | 1_Testes_ARID4B: |
| 1_Testes_ARID4B:            | 175 in gene         | 1 | 25.000 | 1 | 1_Testes_ARID4B: |
| 1_Testes_ARID4B:            | 258 in gene         | 1 | 16.000 | 1 | 1_Testes_ARID4B: |
| 1_Testes_ARID4B: 104, 29144 | in gene, downstream | 1 | 20.500 | 2 | 1_Testes_ARID4B: |
| 1_Testes_ARID4B: 322, 18983 | in gene, downstream | 1 | 24.500 | 2 | 1_Testes_ARID4B: |
| 1_Testes_ARID4B:            | 306 downstream      | 1 | 30.000 | 1 | 1_Testes_ARID4B: |
| 1_Testes_ARID4B:            | 115 in gene         | 1 | 26.000 | 1 | 1_Testes_ARID4B: |
| 1_Testes_ARID4B:            | 1034 in gene        | 1 | 24.000 | 1 | 1_Testes_ARID4B: |
| 1_Testes_ARID4B:            | -289 upstream       | 1 | 37.000 | 1 | 1_Testes_ARID4B: |
| 1_Testes_ARID4B:            | 343 in gene         | 1 | 20.000 | 1 | 1_Testes_ARID4B: |
| 1_Testes_ARID4B:            | 51 in gene          | 1 | 20.000 | 1 | 1_Testes_ARID4B: |
| 1_Testes_ARID4B:            | 275 in gene         | 1 | 33.000 | 1 | 1_Testes_ARID4B: |
| 1_Testes_ARID4B:            | 37 in gene          | 1 | 30.000 | 1 | 1_Testes_ARID4B: |
| 1_Testes_ARID4B:            | 8084 downstream     | 1 | 30.000 | 1 | 1_Testes_ARID4B: |
| 1_Testes_ARID4B:            | 7949 downstream     | 1 | 30.000 | 1 | 1_Testes_ARID4B: |
| 1_Testes_ARID4B:            | 7816 downstream     | 1 | 30.000 | 1 | 1_Testes_ARID4B: |
| 1_Testes_ARID4B:            | 7688 downstream     | 1 | 30.000 | 1 | 1_Testes_ARID4B: |
| 1_Testes_ARID4B:            | 7579 downstream     | 1 | 30.000 | 1 | 1_Testes_ARID4B: |
| 1_Testes_ARID4B:            | -177 upstream       | 1 | 30.000 | 1 | 1_Testes_ARID4B: |
| 1_Testes_ARID4B:            | 436 in gene         | 1 | 23.000 | 1 | 1_Testes_ARID4B: |
| 1_Testes_ARID4B:            | 14002 in gene       | 1 | 20.000 | 1 | 1_Testes_ARID4B: |
| 1_Testes_ARID4B:            | 1502 in gene        | 1 | 22.000 | 1 | 1_Testes_ARID4B: |
| 1_Testes_ARID4B:            | -8567 upstream      | 1 | 57.000 | 1 | 1_Testes_ARID4B: |
| 1_Testes_ARID4B:            | 324 in gene         | 1 | 57.000 | 1 | 1_Testes_ARID4B: |
| 1_Testes_ARID4B:            | -5667 upstream      | 1 | 57.000 | 1 | 1_Testes_ARID4B: |
| 1_Testes_ARID4B:            | 196 in gene         | 1 | 50.000 | 1 | 1_Testes_ARID4B: |
| 1_Testes_ARID4B:            | 1081 in gene        | 1 | 15.000 | 1 | 1_Testes_ARID4B: |
| 1_Testes_ARID4B:            | 197 in gene         | 1 | 26.000 | 1 | 1_Testes_ARID4B: |
| 1_Testes_ARID4B:            | 468 in gene         | 1 | 20.000 | 1 | 1_Testes_ARID4B: |
| 1_Testes_ARID4B:            | -377 upstream       | 1 | 20.000 | 1 | 1_Testes_ARID4B: |
| 1_Testes_ARID4B:            | 112 in gene         | 1 | 20.000 | 1 | 1_Testes_ARID4B: |
| 1_Testes_ARID4B:            | 252 in gene         | 1 | 27.000 | 1 | 1_Testes_ARID4B: |
| 1_Testes_ARID4B:            | -465 upstream       | 1 | 27.000 | 1 | 1_Testes_ARID4B: |
| 1_Testes_ARID4B:            | 125 in gene         | 1 | 28.000 | 1 | 1_Testes_ARID4B: |
| 1_Testes_ARID4B: -87, -551  | upstream, upstream  | 1 | 28.000 | 2 | 1_Testes_ARID4B: |
| 1_Testes_ARID4B: -7, 457    | upstream, in gene   | 1 | 28.000 | 2 | 1_Testes_ARID4B: |
| 1_Testes_ARID4B:            | 21 in gene          | 1 | 22.000 | 1 | 1_Testes_ARID4B: |
| 1_Testes_ARID4B:            | 624 in gene         | 1 | 17.000 | 1 | 1_Testes_ARID4B: |



|                                    |                        |   |        |   |                  |
|------------------------------------|------------------------|---|--------|---|------------------|
| 1_Testes_ARID4B:                   | -18 upstream           | 1 | 42.000 | 1 | 1_Testes_ARID4B: |
| 1_Testes_ARID4B:                   | -690 upstream          | 1 | 24.000 | 1 | 1_Testes_ARID4B: |
| 1_Testes_ARID4B:                   | 601 in gene            | 1 | 24.000 | 1 | 1_Testes_ARID4B: |
| 1_Testes_ARID4B:                   | -2475 upstream         | 1 | 24.000 | 1 | 1_Testes_ARID4B: |
| 1_Testes_ARID4B:                   | 38 in gene             | 1 | 25.000 | 1 | 1_Testes_ARID4B: |
| 1_Testes_ARID4B:                   | 1713 in gene           | 1 | 24.000 | 1 | 1_Testes_ARID4B: |
| 1_Testes_ARID4B:                   | 1483 downstream        | 1 | 24.000 | 1 | 1_Testes_ARID4B: |
| 1_Testes_ARID4B:                   | 525 in gene            | 1 | 22.000 | 1 | 1_Testes_ARID4B: |
| 1_Testes_ARID4B:                   | 607 in gene            | 1 | 27.000 | 1 | 1_Testes_ARID4B: |
| 1_Testes_ARID4B:                   | 542 in gene            | 1 | 21.000 | 1 | 1_Testes_ARID4B: |
| 1_Testes_ARID4B:                   | -636 upstream          | 1 | 21.000 | 1 | 1_Testes_ARID4B: |
| 1_Testes_ARID4B:                   | 17 in gene             | 1 | 32.000 | 1 | 1_Testes_ARID4B: |
| 1_Testes_ARID4B:                   | 308 in gene            | 1 | 20.000 | 1 | 1_Testes_ARID4B: |
| 1_Testes_ARID4B:                   | -799 upstream          | 1 | 20.000 | 1 | 1_Testes_ARID4B: |
| 1_Testes_ARID4B: 3255, 231         | in gene, in gene       | 1 | 21.500 | 2 | 1_Testes_ARID4B: |
| 1_Testes_ARID4B:                   | 520 in gene            | 1 | 27.000 | 1 | 1_Testes_ARID4B: |
| 1_Testes_ARID4B:                   | -731 upstream          | 1 | 27.000 | 1 | 1_Testes_ARID4B: |
| 1_Testes_ARID4B:                   | 80 in gene             | 1 | 33.000 | 1 | 1_Testes_ARID4B: |
| 1_Testes_ARID4B:                   | 529 in gene            | 1 | 26.000 | 1 | 1_Testes_ARID4B: |
| 1_Testes_ARID4B:                   | -856 upstream          | 1 | 26.000 | 1 | 1_Testes_ARID4B: |
| 1_Testes_ARID4B:                   | 284 in gene            | 1 | 26.000 | 1 | 1_Testes_ARID4B: |
| 1_Testes_ARID4B: 166, 13766        | in gene, downstream    | 1 | 29.000 | 2 | 1_Testes_ARID4B: |
| 1_Testes_ARID4B:                   | 112 in gene            | 1 | 27.000 | 1 | 1_Testes_ARID4B: |
| 1_Testes_ARID4B:                   | 866 in gene            | 1 | 29.000 | 1 | 1_Testes_ARID4B: |
| 1_Testes_ARID4B:                   | -487 upstream          | 1 | 19.000 | 1 | 1_Testes_ARID4B: |
| 1_Testes_ARID4B:                   | 404 in gene            | 1 | 19.000 | 1 | 1_Testes_ARID4B: |
| 1_Testes_ARID4B:                   | 21183 downstream       | 1 | 19.000 | 1 | 1_Testes_ARID4B: |
| 1_Testes_ARID4B:                   | 177 in gene            | 1 | 15.000 | 1 | 1_Testes_ARID4B: |
| 1_Testes_ARID4B:                   | -325 upstream          | 1 | 38.000 | 1 | 1_Testes_ARID4B: |
| 1_Testes_ARID4B:                   | 166 in gene            | 1 | 38.000 | 1 | 1_Testes_ARID4B: |
| 1_Testes_ARID4B: 87, -6265         | in gene, upstream      | 1 | 18.000 | 2 | 1_Testes_ARID4B: |
| 1_Testes_ARID4B: -6158, 194, 49234 | upstream, in gene, dow | 1 | 22.333 | 3 | 1_Testes_ARID4B: |
| 1_Testes_ARID4B:                   | -298 upstream          | 1 | 31.000 | 1 | 1_Testes_ARID4B: |
| 1_Testes_ARID4B:                   | 74 in gene             | 1 | 36.000 | 1 | 1_Testes_ARID4B: |
| 1_Testes_ARID4B:                   | 313 in gene            | 1 | 36.000 | 1 | 1_Testes_ARID4B: |
| 1_Testes_ARID4B:                   | 127 in gene            | 1 | 24.000 | 1 | 1_Testes_ARID4B: |
| 1_Testes_ARID4B:                   | 374 in gene            | 1 | 24.000 | 1 | 1_Testes_ARID4B: |
| 1_Testes_ARID4B:                   | 159 in gene            | 1 | 25.000 | 1 | 1_Testes_ARID4B: |
| 1_Testes_ARID4B:                   | -223 upstream          | 1 | 25.000 | 1 | 1_Testes_ARID4B: |
| 1_Testes_ARID4B:                   | 128 in gene            | 1 | 28.000 | 1 | 1_Testes_ARID4B: |
| 1_Testes_ARID4B:                   | -507 upstream          | 1 | 32.000 | 1 | 1_Testes_ARID4B: |
| 1_Testes_ARID4B:                   | 24 in gene             | 1 | 32.000 | 1 | 1_Testes_ARID4B: |
| 1_Testes_ARID4B:                   | 378 in gene            | 1 | 29.000 | 1 | 1_Testes_ARID4B: |
| 1_Testes_ARID4B:                   | 64 in gene             | 1 | 31.000 | 1 | 1_Testes_ARID4B: |
| 1_Testes_ARID4B:                   | 100 in gene            | 1 | 24.000 | 1 | 1_Testes_ARID4B: |
| 1_Testes_ARID4B:                   | 234 in gene            | 1 | 27.000 | 1 | 1_Testes_ARID4B: |
| 1_Testes_ARID4B:                   | 396 in gene            | 1 | 18.000 | 1 | 1_Testes_ARID4B: |

|                             |                     |   |        |   |                  |
|-----------------------------|---------------------|---|--------|---|------------------|
| 1_Testes_ARID4B:            | 382 in gene         | 1 | 31.000 | 1 | 1_Testes_ARID4B: |
| 1_Testes_ARID4B:            | 547 in gene         | 1 | 20.000 | 1 | 1_Testes_ARID4B: |
| 1_Testes_ARID4B:            | 140 in gene         | 1 | 28.000 | 1 | 1_Testes_ARID4B: |
| 1_Testes_ARID4B:            | 87 in gene          | 1 | 38.000 | 1 | 1_Testes_ARID4B: |
| 1_Testes_ARID4B:            | -218 upstream       | 1 | 44.000 | 1 | 1_Testes_ARID4B: |
| 1_Testes_ARID4B: 63123, 243 | downstream, in gene | 1 | 33.500 | 2 | 1_Testes_ARID4B: |
| 1_Testes_ARID4B:            | 163 in gene         | 1 | 18.000 | 1 | 1_Testes_ARID4B: |
| 1_Testes_ARID4B:            | 64815 downstream    | 1 | 18.000 | 1 | 1_Testes_ARID4B: |
| 1_Testes_ARID4B:            | 114 in gene         | 1 | 34.000 | 1 | 1_Testes_ARID4B: |
| 1_Testes_ARID4B:            | -238 upstream       | 1 | 34.000 | 1 | 1_Testes_ARID4B: |
| 1_Testes_ARID4B:            | 559 in gene         | 1 | 26.000 | 1 | 1_Testes_ARID4B: |
| 1_Testes_ARID4B:            | 58 in gene          | 1 | 19.000 | 1 | 1_Testes_ARID4B: |
| 1_Testes_ARID4B:            | 36 in gene          | 1 | 37.000 | 1 | 1_Testes_ARID4B: |
| 1_Testes_ARID4B:            | 81 in gene          | 1 | 29.000 | 1 | 1_Testes_ARID4B: |
| 1_Testes_ARID4B:            | -299 upstream       | 1 | 24.000 | 1 | 1_Testes_ARID4B: |
| 1_Testes_ARID4B:            | 202 in gene         | 1 | 25.000 | 1 | 1_Testes_ARID4B: |
| 1_Testes_ARID4B:            | -814 upstream       | 1 | 25.000 | 1 | 1_Testes_ARID4B: |
| 1_Testes_ARID4B:            | 232 in gene         | 1 | 25.000 | 1 | 1_Testes_ARID4B: |
| 1_Testes_ARID4B:            | -2677 upstream      | 1 | 17.000 | 1 | 1_Testes_ARID4B: |
| 1_Testes_ARID4B:            | -12 upstream        | 1 | 17.000 | 1 | 1_Testes_ARID4B: |
| 1_Testes_ARID4B:            | 321 in gene         | 1 | 19.000 | 1 | 1_Testes_ARID4B: |
| 1_Testes_ARID4B:            | 7435 in gene        | 1 | 24.000 | 1 | 1_Testes_ARID4B: |
| 1_Testes_ARID4B:            | 25 in gene          | 1 | 21.000 | 1 | 1_Testes_ARID4B: |
| 1_Testes_ARID4B:            | 291 in gene         | 1 | 23.000 | 1 | 1_Testes_ARID4B: |
| 1_Testes_ARID4B:            | 18 in gene          | 1 | 24.000 | 1 | 1_Testes_ARID4B: |
| 1_Testes_ARID4B:            | 29 in gene          | 1 | 23.000 | 1 | 1_Testes_ARID4B: |
| 1_Testes_ARID4B:            | 387 in gene         | 1 | 16.000 | 1 | 1_Testes_ARID4B: |
| 1_Testes_ARID4B:            | 92 in gene          | 1 | 21.000 | 1 | 1_Testes_ARID4B: |
| 1_Testes_ARID4B: 615, 2215  | in gene, in gene    | 1 | 24.000 | 2 | 1_Testes_ARID4B: |
| 1_Testes_ARID4B:            | -491 upstream       | 1 | 22.000 | 1 | 1_Testes_ARID4B: |
| 1_Testes_ARID4B:            | 181 in gene         | 1 | 22.000 | 1 | 1_Testes_ARID4B: |
| 1_Testes_ARID4B:            | -4117 upstream      | 1 | 22.000 | 1 | 1_Testes_ARID4B: |
| 1_Testes_ARID4B:            | 41967 downstream    | 1 | 24.000 | 1 | 1_Testes_ARID4B: |
| 1_Testes_ARID4B:            | 321 in gene         | 1 | 24.000 | 1 | 1_Testes_ARID4B: |
| 1_Testes_ARID4B: 842, 48138 | in gene, downstream | 1 | 27.000 | 2 | 1_Testes_ARID4B: |
| 1_Testes_ARID4B:            | 187 in gene         | 1 | 28.000 | 1 | 1_Testes_ARID4B: |
| 1_Testes_ARID4B:            | -289 upstream       | 1 | 28.000 | 1 | 1_Testes_ARID4B: |
| 1_Testes_ARID4B:            | 641 in gene         | 1 | 22.000 | 1 | 1_Testes_ARID4B: |
| 1_Testes_ARID4B:            | 371 in gene         | 1 | 38.000 | 1 | 1_Testes_ARID4B: |
| 1_Testes_ARID4B:            | -200 upstream       | 1 | 26.000 | 1 | 1_Testes_ARID4B: |
| 1_Testes_ARID4B:            | 126 in gene         | 1 | 38.000 | 1 | 1_Testes_ARID4B: |
| 1_Testes_ARID4B:            | -142 upstream       | 1 | 38.000 | 1 | 1_Testes_ARID4B: |
| 1_Testes_ARID4B:            | 366 in gene         | 1 | 21.000 | 1 | 1_Testes_ARID4B: |
| 1_Testes_ARID4B:            | -12 upstream        | 1 | 29.000 | 1 | 1_Testes_ARID4B: |
| 1_Testes_ARID4B:            | 177 in gene         | 1 | 30.000 | 1 | 1_Testes_ARID4B: |
| 1_Testes_ARID4B:            | 85 in gene          | 1 | 30.000 | 1 | 1_Testes_ARID4B: |
| 1_Testes_ARID4B:            | 9704 downstream     | 1 | 30.000 | 1 | 1_Testes_ARID4B: |

|                                    |                          |   |        |   |                  |
|------------------------------------|--------------------------|---|--------|---|------------------|
| 1_Testes_ARID4B:                   | -307 upstream            | 1 | 41.000 | 1 | 1_Testes_ARID4B: |
| 1_Testes_ARID4B:                   | 252 in gene              | 1 | 41.000 | 1 | 1_Testes_ARID4B: |
| 1_Testes_ARID4B:                   | -197 upstream            | 1 | 41.000 | 1 | 1_Testes_ARID4B: |
| 1_Testes_ARID4B:                   | 349 in gene              | 1 | 27.000 | 1 | 1_Testes_ARID4B: |
| 1_Testes_ARID4B:                   | 318 in gene              | 1 | 30.000 | 1 | 1_Testes_ARID4B: |
| 1_Testes_ARID4B:                   | -3542 upstream           | 1 | 30.000 | 1 | 1_Testes_ARID4B: |
| 1_Testes_ARID4B:                   | 22498 downstream         | 1 | 44.000 | 1 | 1_Testes_ARID4B: |
| 1_Testes_ARID4B:                   | 108 in gene              | 1 | 44.000 | 1 | 1_Testes_ARID4B: |
| 1_Testes_ARID4B:                   | 405 in gene              | 1 | 32.000 | 1 | 1_Testes_ARID4B: |
| 1_Testes_ARID4B:                   | 144 in gene              | 1 | 21.000 | 1 | 1_Testes_ARID4B: |
| 1_Testes_ARID4B:                   | -444 upstream            | 1 | 21.000 | 1 | 1_Testes_ARID4B: |
| 1_Testes_ARID4B:                   | 5363 in gene             | 1 | 23.000 | 1 | 1_Testes_ARID4B: |
| 1_Testes_ARID4B:                   | 19621 downstream         | 1 | 23.000 | 1 | 1_Testes_ARID4B: |
| 1_Testes_ARID4B:                   | 1159 in gene             | 1 | 16.000 | 1 | 1_Testes_ARID4B: |
| 1_Testes_ARID4B:                   | -1426 upstream           | 1 | 16.000 | 1 | 1_Testes_ARID4B: |
| 1_Testes_ARID4B:                   | -147 upstream            | 1 | 20.000 | 1 | 1_Testes_ARID4B: |
| 1_Testes_ARID4B:                   | 9499 downstream          | 1 | 20.000 | 1 | 1_Testes_ARID4B: |
| 1_Testes_ARID4B:                   | 17478 downstream         | 1 | 20.000 | 1 | 1_Testes_ARID4B: |
| 1_Testes_ARID4B:                   | 467 in gene              | 1 | 26.000 | 1 | 1_Testes_ARID4B: |
| 1_Testes_ARID4B:                   | -4723 upstream           | 1 | 26.000 | 1 | 1_Testes_ARID4B: |
| 1_Testes_ARID4B:                   | 667 in gene              | 1 | 33.000 | 1 | 1_Testes_ARID4B: |
| 1_Testes_ARID4B:                   | 10461 downstream         | 1 | 33.000 | 1 | 1_Testes_ARID4B: |
| 1_Testes_ARID4B:                   | 264 in gene              | 1 | 28.000 | 1 | 1_Testes_ARID4B: |
| 1_Testes_ARID4B:                   | 115049 downstream        | 1 | 21.000 | 1 | 1_Testes_ARID4B: |
| 1_Testes_ARID4B: 226, 43554, 44754 | in gene, in gene, in gen | 1 | 18.667 | 3 | 1_Testes_ARID4B: |
| 1_Testes_ARID4B: 3598, 2398        | downstream, downstre     | 1 | 17.500 | 2 | 1_Testes_ARID4B: |
| 1_Testes_ARID4B: 12366, 16744      | downstream, downstre     | 1 | 18.500 | 2 | 1_Testes_ARID4B: |
| 1_Testes_ARID4B: 3996, -382        | in gene, upstream        | 1 | 18.500 | 2 | 1_Testes_ARID4B: |
| 1_Testes_ARID4B: 38813, 311        | downstream, in gene      | 1 | 19.000 | 2 | 1_Testes_ARID4B: |
| 1_Testes_ARID4B:                   | -362 upstream            | 1 | 21.000 | 1 | 1_Testes_ARID4B: |
| 1_Testes_ARID4B: 16592, -80        | downstream, upstream     | 1 | 24.500 | 2 | 1_Testes_ARID4B: |
| 1_Testes_ARID4B:                   | 209 in gene              | 1 | 28.000 | 1 | 1_Testes_ARID4B: |
| 1_Testes_ARID4B:                   | 5550 downstream          | 1 | 28.000 | 1 | 1_Testes_ARID4B: |
| 1_Testes_ARID4B:                   | -8560 upstream           | 1 | 28.000 | 1 | 1_Testes_ARID4B: |
| 1_Testes_ARID4B: 385, 24369        | in gene, downstream      | 1 | 22.500 | 2 | 1_Testes_ARID4B: |
| 1_Testes_ARID4B:                   | -2752 upstream           | 1 | 21.000 | 1 | 1_Testes_ARID4B: |
| 1_Testes_ARID4B:                   | 141 in gene              | 1 | 21.000 | 1 | 1_Testes_ARID4B: |
| 1_Testes_ARID4B:                   | 12555 downstream         | 1 | 21.000 | 1 | 1_Testes_ARID4B: |
| 1_Testes_ARID4B:                   | -7612 upstream           | 1 | 21.000 | 1 | 1_Testes_ARID4B: |
| 1_Testes_ARID4B:                   | 86 in gene               | 1 | 22.000 | 1 | 1_Testes_ARID4B: |
| 1_Testes_ARID4B:                   | 381 in gene              | 1 | 31.000 | 1 | 1_Testes_ARID4B: |
| 1_Testes_ARID4B:                   | 11793 in gene            | 1 | 33.000 | 1 | 1_Testes_ARID4B: |
| 1_Testes_ARID4B:                   | 539 in gene              | 1 | 22.000 | 1 | 1_Testes_ARID4B: |
| 1_Testes_ARID4B:                   | 6152 in gene             | 1 | 22.000 | 1 | 1_Testes_ARID4B: |
| 1_Testes_ARID4B:                   | 1488 in gene             | 1 | 22.000 | 1 | 1_Testes_ARID4B: |
| 1_Testes_ARID4B:                   | -3618 upstream           | 1 | 28.000 | 1 | 1_Testes_ARID4B: |
| 1_Testes_ARID4B:                   | 241 in gene              | 1 | 28.000 | 1 | 1_Testes_ARID4B: |

|                                    |                        |   |        |   |                  |
|------------------------------------|------------------------|---|--------|---|------------------|
| 1_Testes_ARID4B:                   | 109 in gene            | 1 | 28.000 | 1 | 1_Testes_ARID4B: |
| 1_Testes_ARID4B: 30892, 348, -6372 | downstream, in gene, u | 1 | 25.000 | 3 | 1_Testes_ARID4B: |
| 1_Testes_ARID4B: -758, 5962        | upstream, downstream   | 1 | 23.500 | 2 | 1_Testes_ARID4B: |
| 1_Testes_ARID4B: -6561, 159        | upstream, in gene      | 1 | 23.500 | 2 | 1_Testes_ARID4B: |
| 1_Testes_ARID4B:                   | 204 in gene            | 1 | 16.000 | 1 | 1_Testes_ARID4B: |
| 1_Testes_ARID4B:                   | 209 in gene            | 1 | 36.000 | 1 | 1_Testes_ARID4B: |
| 1_Testes_ARID4B:                   | 23280 downstream       | 1 | 31.000 | 1 | 1_Testes_ARID4B: |
| 1_Testes_ARID4B:                   | 155 in gene            | 1 | 31.000 | 1 | 1_Testes_ARID4B: |
| 1_Testes_ARID4B:                   | 395 in gene            | 1 | 30.000 | 1 | 1_Testes_ARID4B: |
| 1_Testes_ARID4B:                   | 796 in gene            | 1 | 26.000 | 1 | 1_Testes_ARID4B: |
| 1_Testes_ARID4B:                   | -309 upstream          | 1 | 36.000 | 1 | 1_Testes_ARID4B: |
| 1_Testes_ARID4B:                   | 273 in gene            | 1 | 36.000 | 1 | 1_Testes_ARID4B: |
| 1_Testes_ARID4B:                   | 279 in gene            | 1 | 22.000 | 1 | 1_Testes_ARID4B: |
| 1_Testes_ARID4B: -525, 371         | upstream, in gene      | 1 | 24.500 | 2 | 1_Testes_ARID4B: |
| 1_Testes_ARID4B:                   | 18031 downstream       | 1 | 30.000 | 1 | 1_Testes_ARID4B: |
| 1_Testes_ARID4B:                   | 28784 in gene          | 1 | 30.000 | 1 | 1_Testes_ARID4B: |
| 1_Testes_ARID4B:                   | -329 upstream          | 1 | 22.000 | 1 | 1_Testes_ARID4B: |
| 1_Testes_ARID4B:                   | 228 in gene            | 1 | 21.000 | 1 | 1_Testes_ARID4B: |
| 1_Testes_ARID4B:                   | -409 upstream          | 1 | 23.000 | 1 | 1_Testes_ARID4B: |
| 1_Testes_ARID4B:                   | 271 in gene            | 1 | 30.000 | 1 | 1_Testes_ARID4B: |
| 1_Testes_ARID4B:                   | -565 upstream          | 1 | 30.000 | 1 | 1_Testes_ARID4B: |
| 1_Testes_ARID4B: 2049, -319        | in gene, upstream      | 1 | 23.500 | 2 | 1_Testes_ARID4B: |
| 1_Testes_ARID4B: -8208, -5840      | upstream, upstream     | 1 | 23.500 | 2 | 1_Testes_ARID4B: |
| 1_Testes_ARID4B:                   | 238 in gene            | 1 | 28.000 | 1 | 1_Testes_ARID4B: |
| 1_Testes_ARID4B:                   | 455 in gene            | 1 | 23.000 | 1 | 1_Testes_ARID4B: |
| 1_Testes_ARID4B:                   | 302 in gene            | 1 | 21.000 | 1 | 1_Testes_ARID4B: |
| 1_Testes_ARID4B:                   | -316 upstream          | 1 | 24.000 | 1 | 1_Testes_ARID4B: |
| 1_Testes_ARID4B:                   | 31 in gene             | 1 | 24.000 | 1 | 1_Testes_ARID4B: |
| 1_Testes_ARID4B:                   | 87 in gene             | 1 | 19.000 | 1 | 1_Testes_ARID4B: |
| 1_Testes_ARID4B:                   | 191075 downstream      | 1 | 18.000 | 1 | 1_Testes_ARID4B: |
| 1_Testes_ARID4B: 17, 83068         | in gene, downstream    | 1 | 17.500 | 2 | 1_Testes_ARID4B: |
| 1_Testes_ARID4B:                   | 357 in gene            | 1 | 17.000 | 1 | 1_Testes_ARID4B: |
| 1_Testes_ARID4B:                   | 243 in gene            | 1 | 21.000 | 1 | 1_Testes_ARID4B: |
| 1_Testes_ARID4B:                   | -1485 upstream         | 1 | 21.000 | 1 | 1_Testes_ARID4B: |
| 1_Testes_ARID4B:                   | -601 upstream          | 1 | 21.000 | 1 | 1_Testes_ARID4B: |
| 1_Testes_ARID4B:                   | 518 in gene            | 1 | 25.000 | 1 | 1_Testes_ARID4B: |
| 1_Testes_ARID4B:                   | 2203 in gene           | 1 | 26.000 | 1 | 1_Testes_ARID4B: |
| 1_Testes_ARID4B:                   | 123 in gene            | 1 | 33.000 | 1 | 1_Testes_ARID4B: |
| 1_Testes_ARID4B:                   | -121 upstream          | 1 | 33.000 | 1 | 1_Testes_ARID4B: |
| 1_Testes_ARID4B: 63003, 219        | downstream, in gene    | 1 | 29.500 | 2 | 1_Testes_ARID4B: |
| 1_Testes_ARID4B:                   | 517 in gene            | 1 | 27.000 | 1 | 1_Testes_ARID4B: |
| 1_Testes_ARID4B: 1720, 973         | in gene, in gene       | 1 | 18.500 | 2 | 1_Testes_ARID4B: |
| 1_Testes_ARID4B:                   | -8087 upstream         | 1 | 23.000 | 1 | 1_Testes_ARID4B: |
| 1_Testes_ARID4B:                   | 227 in gene            | 1 | 31.000 | 1 | 1_Testes_ARID4B: |
| 1_Testes_ARID4B:                   | 149 in gene            | 1 | 31.000 | 1 | 1_Testes_ARID4B: |
| 1_Testes_ARID4B:                   | 231 in gene            | 1 | 33.000 | 1 | 1_Testes_ARID4B: |
| 1_Testes_ARID4B:                   | 276 in gene            | 1 | 28.000 | 1 | 1_Testes_ARID4B: |

|                  |             |                     |   |        |   |                  |
|------------------|-------------|---------------------|---|--------|---|------------------|
| 1_Testes_ARID4B: | 45125       | downstream          | 1 | 30.000 | 1 | 1_Testes_ARID4B: |
| 1_Testes_ARID4B: | 467         | in gene             | 1 | 30.000 | 1 | 1_Testes_ARID4B: |
| 1_Testes_ARID4B: | 494         | in gene             | 1 | 30.000 | 1 | 1_Testes_ARID4B: |
| 1_Testes_ARID4B: | 95          | in gene             | 1 | 29.000 | 1 | 1_Testes_ARID4B: |
| 1_Testes_ARID4B: | 5046        | downstream          | 1 | 29.000 | 1 | 1_Testes_ARID4B: |
| 1_Testes_ARID4B: | -5401       | upstream            | 1 | 29.000 | 1 | 1_Testes_ARID4B: |
| 1_Testes_ARID4B: | 140521      | in gene             | 1 | 19.000 | 1 | 1_Testes_ARID4B: |
| 1_Testes_ARID4B: | -20, 101756 | upstream, in gene   | 1 | 23.000 | 2 | 1_Testes_ARID4B: |
| 1_Testes_ARID4B: | 1007        | in gene             | 1 | 35.000 | 1 | 1_Testes_ARID4B: |
| 1_Testes_ARID4B: | 227         | in gene             | 1 | 26.000 | 1 | 1_Testes_ARID4B: |
| 1_Testes_ARID4B: | 818         | in gene             | 1 | 18.000 | 1 | 1_Testes_ARID4B: |
| 1_Testes_ARID4B: | -128        | upstream            | 1 | 27.000 | 1 | 1_Testes_ARID4B: |
| 1_Testes_ARID4B: | 1079        | in gene             | 1 | 33.000 | 1 | 1_Testes_ARID4B: |
| 1_Testes_ARID4B: | -1404       | upstream            | 1 | 33.000 | 1 | 1_Testes_ARID4B: |
| 1_Testes_ARID4B: | 9647        | in gene             | 1 | 36.000 | 1 | 1_Testes_ARID4B: |
| 1_Testes_ARID4B: | 144123      | in gene             | 1 | 22.000 | 1 | 1_Testes_ARID4B: |
| 1_Testes_ARID4B: | 738         | in gene             | 1 | 20.000 | 1 | 1_Testes_ARID4B: |
| 1_Testes_ARID4B: | 956         | in gene             | 1 | 31.000 | 1 | 1_Testes_ARID4B: |
| 1_Testes_ARID4B: | 144         | in gene             | 1 | 28.000 | 1 | 1_Testes_ARID4B: |
| 1_Testes_ARID4B: | -106        | upstream            | 1 | 30.000 | 1 | 1_Testes_ARID4B: |
| 1_Testes_ARID4B: | 247         | in gene             | 1 | 25.000 | 1 | 1_Testes_ARID4B: |
| 1_Testes_ARID4B: | 302, -594   | in gene, upstream   | 1 | 19.500 | 2 | 1_Testes_ARID4B: |
| 1_Testes_ARID4B: | 409         | in gene             | 1 | 23.000 | 1 | 1_Testes_ARID4B: |
| 1_Testes_ARID4B: | 103         | in gene             | 1 | 40.000 | 1 | 1_Testes_ARID4B: |
| 1_Testes_ARID4B: | 36246, 134  | downstream, in gene | 1 | 35.500 | 2 | 1_Testes_ARID4B: |
| 1_Testes_ARID4B: | 405, 108693 | in gene, downstream | 1 | 49.000 | 2 | 1_Testes_ARID4B: |
| 1_Testes_ARID4B: | 119         | in gene             | 1 | 56.000 | 1 | 1_Testes_ARID4B: |
| 1_Testes_ARID4B: | 34          | in gene             | 1 | 22.000 | 1 | 1_Testes_ARID4B: |
| 1_Testes_ARID4B: | 220         | in gene             | 1 | 17.000 | 1 | 1_Testes_ARID4B: |
| 1_Testes_ARID4B: | 1247        | in gene             | 1 | 18.000 | 1 | 1_Testes_ARID4B: |
| 1_Testes_ARID4B: | 220         | in gene             | 1 | 31.000 | 1 | 1_Testes_ARID4B: |
| 1_Testes_ARID4B: | 166         | in gene             | 1 | 28.000 | 1 | 1_Testes_ARID4B: |
| 1_Testes_ARID4B: | -485        | upstream            | 1 | 24.000 | 1 | 1_Testes_ARID4B: |
| 1_Testes_ARID4B: | 28304       | in gene             | 1 | 19.000 | 1 | 1_Testes_ARID4B: |
| 1_Testes_ARID4B: | -105        | upstream            | 1 | 21.000 | 1 | 1_Testes_ARID4B: |
| 1_Testes_ARID4B: | 156         | in gene             | 1 | 27.000 | 1 | 1_Testes_ARID4B: |
| 1_Testes_ARID4B: | 46607, 95   | downstream, in gene | 1 | 24.500 | 2 | 1_Testes_ARID4B: |
| 1_Testes_ARID4B: | 9502        | downstream          | 1 | 22.000 | 1 | 1_Testes_ARID4B: |
| 1_Testes_ARID4B: | 92          | in gene             | 1 | 32.000 | 1 | 1_Testes_ARID4B: |
| 1_Testes_ARID4B: | -2414       | upstream            | 1 | 59.000 | 1 | 1_Testes_ARID4B: |
| 1_Testes_ARID4B: | 1438        | in gene             | 1 | 59.000 | 1 | 1_Testes_ARID4B: |
| 1_Testes_ARID4B: | 196617      | in gene             | 1 | 20.000 | 1 | 1_Testes_ARID4B: |
| 1_Testes_ARID4B: | 30          | in gene             | 1 | 27.000 | 1 | 1_Testes_ARID4B: |
| 1_Testes_ARID4B: | 78          | in gene             | 1 | 26.000 | 1 | 1_Testes_ARID4B: |
| 1_Testes_ARID4B: | 242         | in gene             | 1 | 36.000 | 1 | 1_Testes_ARID4B: |
| 1_Testes_ARID4B: | -194        | upstream            | 1 | 21.000 | 1 | 1_Testes_ARID4B: |
| 1_Testes_ARID4B: | -188        | upstream            | 1 | 21.000 | 1 | 1_Testes_ARID4B: |

|                               |                      |   |        |   |                  |
|-------------------------------|----------------------|---|--------|---|------------------|
| 1_Testes_ARID4B:              | 225 in gene          | 1 | 17.000 | 1 | 1_Testes_ARID4B: |
| 1_Testes_ARID4B:              | 537 in gene          | 1 | 36.000 | 1 | 1_Testes_ARID4B: |
| 1_Testes_ARID4B:              | 386 in gene          | 1 | 14.000 | 1 | 1_Testes_ARID4B: |
| 1_Testes_ARID4B:              | 194 in gene          | 1 | 39.000 | 1 | 1_Testes_ARID4B: |
| 1_Testes_ARID4B:              | 88 in gene           | 1 | 24.000 | 1 | 1_Testes_ARID4B: |
| 1_Testes_ARID4B:              | -9133 upstream       | 1 | 24.000 | 1 | 1_Testes_ARID4B: |
| 1_Testes_ARID4B:              | 2377 in gene         | 1 | 24.000 | 1 | 1_Testes_ARID4B: |
| 1_Testes_ARID4B:              | 151192 downstream    | 1 | 24.000 | 1 | 1_Testes_ARID4B: |
| 1_Testes_ARID4B:              | 57 in gene           | 1 | 24.000 | 1 | 1_Testes_ARID4B: |
| 1_Testes_ARID4B: -517, -5445  | upstream, upstream   | 1 | 20.000 | 2 | 1_Testes_ARID4B: |
| 1_Testes_ARID4B: 351, 5279    | in gene, in gene     | 1 | 20.000 | 2 | 1_Testes_ARID4B: |
| 1_Testes_ARID4B:              | 388 in gene          | 1 | 31.000 | 1 | 1_Testes_ARID4B: |
| 1_Testes_ARID4B:              | 509 in gene          | 1 | 33.000 | 1 | 1_Testes_ARID4B: |
| 1_Testes_ARID4B:              | 379 in gene          | 1 | 32.000 | 1 | 1_Testes_ARID4B: |
| 1_Testes_ARID4B:              | 66 in gene           | 1 | 26.000 | 1 | 1_Testes_ARID4B: |
| 1_Testes_ARID4B: -558, 818    | upstream, in gene    | 1 | 22.500 | 2 | 1_Testes_ARID4B: |
| 1_Testes_ARID4B:              | -546 upstream        | 1 | 30.000 | 1 | 1_Testes_ARID4B: |
| 1_Testes_ARID4B:              | 282 in gene          | 1 | 30.000 | 1 | 1_Testes_ARID4B: |
| 1_Testes_ARID4B:              | 53669 downstream     | 1 | 31.000 | 1 | 1_Testes_ARID4B: |
| 1_Testes_ARID4B:              | 248 in gene          | 1 | 31.000 | 1 | 1_Testes_ARID4B: |
| 1_Testes_ARID4B:              | 246 in gene          | 1 | 21.000 | 1 | 1_Testes_ARID4B: |
| 1_Testes_ARID4B:              | 1325 in gene         | 1 | 20.000 | 1 | 1_Testes_ARID4B: |
| 1_Testes_ARID4B:              | 19438 downstream     | 1 | 20.000 | 1 | 1_Testes_ARID4B: |
| 1_Testes_ARID4B:              | 386 in gene          | 1 | 19.000 | 1 | 1_Testes_ARID4B: |
| 1_Testes_ARID4B: 83554, 130   | downstream, in gene  | 1 | 20.500 | 2 | 1_Testes_ARID4B: |
| 1_Testes_ARID4B:              | 40306 downstream     | 1 | 24.000 | 1 | 1_Testes_ARID4B: |
| 1_Testes_ARID4B:              | -196 upstream        | 1 | 24.000 | 1 | 1_Testes_ARID4B: |
| 1_Testes_ARID4B:              | 60767 in gene        | 1 | 34.000 | 1 | 1_Testes_ARID4B: |
| 1_Testes_ARID4B:              | 13354 in gene        | 1 | 47.000 | 1 | 1_Testes_ARID4B: |
| 1_Testes_ARID4B:              | 175 in gene          | 1 | 47.000 | 1 | 1_Testes_ARID4B: |
| 1_Testes_ARID4B:              | 160 in gene          | 1 | 29.000 | 1 | 1_Testes_ARID4B: |
| 1_Testes_ARID4B:              | 557 in gene          | 1 | 25.000 | 1 | 1_Testes_ARID4B: |
| 1_Testes_ARID4B: 237, -8483   | in gene, upstream    | 1 | 23.000 | 2 | 1_Testes_ARID4B: |
| 1_Testes_ARID4B: 7756, -964   | downstream, upstream | 1 | 23.000 | 2 | 1_Testes_ARID4B: |
| 1_Testes_ARID4B: -10291, -19  | upstream, upstream   | 1 | 25.500 | 2 | 1_Testes_ARID4B: |
| 1_Testes_ARID4B:              | 215 in gene          | 1 | 21.000 | 1 | 1_Testes_ARID4B: |
| 1_Testes_ARID4B:              | 150 in gene          | 1 | 27.000 | 1 | 1_Testes_ARID4B: |
| 1_Testes_ARID4B:              | 252 in gene          | 1 | 22.000 | 1 | 1_Testes_ARID4B: |
| 1_Testes_ARID4B:              | 930 in gene          | 1 | 21.000 | 1 | 1_Testes_ARID4B: |
| 1_Testes_ARID4B: -1321, 16455 | upstream, downstream | 1 | 20.000 | 2 | 1_Testes_ARID4B: |
| 1_Testes_ARID4B:              | 269 in gene          | 1 | 19.000 | 1 | 1_Testes_ARID4B: |
| 1_Testes_ARID4B:              | 284 in gene          | 1 | 33.000 | 1 | 1_Testes_ARID4B: |
| 1_Testes_ARID4B:              | 74 in gene           | 1 | 28.000 | 1 | 1_Testes_ARID4B: |
| 1_Testes_ARID4B:              | -2727 upstream       | 1 | 21.000 | 1 | 1_Testes_ARID4B: |
| 1_Testes_ARID4B:              | -217 upstream        | 1 | 25.000 | 1 | 1_Testes_ARID4B: |
| 1_Testes_ARID4B:              | 462 in gene          | 1 | 20.000 | 1 | 1_Testes_ARID4B: |
| 1_Testes_ARID4B:              | -1202 upstream       | 1 | 30.000 | 1 | 1_Testes_ARID4B: |

|                                    |                        |   |        |   |                  |
|------------------------------------|------------------------|---|--------|---|------------------|
| 1_Testes_ARID4B:                   | 807 in gene            | 1 | 30.000 | 1 | 1_Testes_ARID4B: |
| 1_Testes_ARID4B:                   | -5640 upstream         | 1 | 25.000 | 1 | 1_Testes_ARID4B: |
| 1_Testes_ARID4B:                   | -262 upstream          | 1 | 25.000 | 1 | 1_Testes_ARID4B: |
| 1_Testes_ARID4B:                   | -1913 upstream         | 1 | 25.000 | 1 | 1_Testes_ARID4B: |
| 1_Testes_ARID4B:                   | 129 in gene            | 1 | 25.000 | 1 | 1_Testes_ARID4B: |
| 1_Testes_ARID4B:                   | 687 in gene            | 1 | 37.000 | 1 | 1_Testes_ARID4B: |
| 1_Testes_ARID4B:                   | 24410 downstream       | 1 | 37.000 | 1 | 1_Testes_ARID4B: |
| 1_Testes_ARID4B:                   | 294 in gene            | 1 | 38.000 | 1 | 1_Testes_ARID4B: |
| 1_Testes_ARID4B:                   | 129 in gene            | 1 | 38.000 | 1 | 1_Testes_ARID4B: |
| 1_Testes_ARID4B:                   | 118086 downstream      | 1 | 26.000 | 1 | 1_Testes_ARID4B: |
| 1_Testes_ARID4B:                   | -1113 upstream         | 1 | 26.000 | 1 | 1_Testes_ARID4B: |
| 1_Testes_ARID4B:                   | 140 in gene            | 1 | 26.000 | 1 | 1_Testes_ARID4B: |
| 1_Testes_ARID4B: 80, 76731         | in gene, downstream    | 1 | 26.500 | 2 | 1_Testes_ARID4B: |
| 1_Testes_ARID4B:                   | -217 upstream          | 1 | 24.000 | 1 | 1_Testes_ARID4B: |
| 1_Testes_ARID4B:                   | -3267 upstream         | 1 | 17.000 | 1 | 1_Testes_ARID4B: |
| 1_Testes_ARID4B:                   | 2179 downstream        | 1 | 17.000 | 1 | 1_Testes_ARID4B: |
| 1_Testes_ARID4B:                   | 4960 in gene           | 1 | 17.000 | 1 | 1_Testes_ARID4B: |
| 1_Testes_ARID4B:                   | 6970 downstream        | 1 | 75.000 | 1 | 1_Testes_ARID4B: |
| 1_Testes_ARID4B:                   | 260 in gene            | 1 | 75.000 | 1 | 1_Testes_ARID4B: |
| 1_Testes_ARID4B:                   | -1298 upstream         | 1 | 75.000 | 1 | 1_Testes_ARID4B: |
| 1_Testes_ARID4B:                   | -24 upstream           | 1 | 75.000 | 1 | 1_Testes_ARID4B: |
| 1_Testes_ARID4B: 26752, 166        | downstream, in gene    | 1 | 46.500 | 2 | 1_Testes_ARID4B: |
| 1_Testes_ARID4B:                   | 12275 in gene          | 1 | 15.000 | 1 | 1_Testes_ARID4B: |
| 1_Testes_ARID4B:                   | -62 upstream           | 1 | 29.000 | 1 | 1_Testes_ARID4B: |
| 1_Testes_ARID4B:                   | 518 in gene            | 1 | 46.000 | 1 | 1_Testes_ARID4B: |
| 1_Testes_ARID4B:                   | -3788 upstream         | 1 | 39.000 | 1 | 1_Testes_ARID4B: |
| 1_Testes_ARID4B:                   | 65 in gene             | 1 | 39.000 | 1 | 1_Testes_ARID4B: |
| 1_Testes_ARID4B:                   | 4739 downstream        | 1 | 39.000 | 1 | 1_Testes_ARID4B: |
| 1_Testes_ARID4B:                   | 27735 downstream       | 1 | 39.000 | 1 | 1_Testes_ARID4B: |
| 1_Testes_ARID4B:                   | 130 in gene            | 1 | 24.000 | 1 | 1_Testes_ARID4B: |
| 1_Testes_ARID4B:                   | 45259 downstream       | 1 | 24.000 | 1 | 1_Testes_ARID4B: |
| 1_Testes_ARID4B:                   | 901 in gene            | 1 | 31.000 | 1 | 1_Testes_ARID4B: |
| 1_Testes_ARID4B:                   | -241 upstream          | 1 | 33.000 | 1 | 1_Testes_ARID4B: |
| 1_Testes_ARID4B:                   | 167 in gene            | 1 | 33.000 | 1 | 1_Testes_ARID4B: |
| 1_Testes_ARID4B:                   | 9091 downstream        | 1 | 34.000 | 1 | 1_Testes_ARID4B: |
| 1_Testes_ARID4B:                   | 159 in gene            | 1 | 34.000 | 1 | 1_Testes_ARID4B: |
| 1_Testes_ARID4B:                   | 20311 downstream       | 1 | 34.000 | 1 | 1_Testes_ARID4B: |
| 1_Testes_ARID4B:                   | 167 in gene            | 1 | 28.000 | 1 | 1_Testes_ARID4B: |
| 1_Testes_ARID4B:                   | -5573 upstream         | 1 | 17.000 | 1 | 1_Testes_ARID4B: |
| 1_Testes_ARID4B:                   | 274 in gene            | 1 | 17.000 | 1 | 1_Testes_ARID4B: |
| 1_Testes_ARID4B:                   | 22633 downstream       | 1 | 17.000 | 1 | 1_Testes_ARID4B: |
| 1_Testes_ARID4B:                   | -396 upstream          | 1 | 38.000 | 1 | 1_Testes_ARID4B: |
| 1_Testes_ARID4B: 205, 12077        | in gene, in gene       | 1 | 28.500 | 2 | 1_Testes_ARID4B: |
| 1_Testes_ARID4B:                   | -10449 upstream        | 1 | 19.000 | 1 | 1_Testes_ARID4B: |
| 1_Testes_ARID4B: 897, 17           | in gene, in gene       | 1 | 27.000 | 2 | 1_Testes_ARID4B: |
| 1_Testes_ARID4B: 26907, 26027, 235 | downstream, downstre   | 1 | 28.333 | 3 | 1_Testes_ARID4B: |
| 1_Testes_ARID4B: 95233, 65, -6623  | downstream, in gene, u | 1 | 31.333 | 3 | 1_Testes_ARID4B: |

|                                         |                          |   |        |   |                  |
|-----------------------------------------|--------------------------|---|--------|---|------------------|
| 1_Testes_ARID4B: 6964, 276              | downstream, in gene      | 1 | 31.500 | 2 | 1_Testes_ARID4B: |
| 1_Testes_ARID4B: -7228, -540            | upstream, upstream       | 1 | 31.500 | 2 | 1_Testes_ARID4B: |
| 1_Testes_ARID4B: -655, -1423            | upstream, upstream       | 1 | 29.500 | 2 | 1_Testes_ARID4B: |
| 1_Testes_ARID4B: -264, 504              | upstream, in gene        | 1 | 29.500 | 2 | 1_Testes_ARID4B: |
| 1_Testes_ARID4B:                        | 21634 in gene            | 1 | 27.000 | 1 | 1_Testes_ARID4B: |
| 1_Testes_ARID4B:                        | 125 in gene              | 1 | 27.000 | 1 | 1_Testes_ARID4B: |
| 1_Testes_ARID4B:                        | 191 in gene              | 1 | 28.000 | 1 | 1_Testes_ARID4B: |
| 1_Testes_ARID4B:                        | 180 in gene              | 1 | 26.000 | 1 | 1_Testes_ARID4B: |
| 1_Testes_ARID4B:                        | 349 in gene              | 1 | 23.000 | 1 | 1_Testes_ARID4B: |
| 1_Testes_ARID4B:                        | 6135 in gene             | 1 | 30.000 | 1 | 1_Testes_ARID4B: |
| 1_Testes_ARID4B:                        | 13 in gene               | 1 | 18.000 | 1 | 1_Testes_ARID4B: |
| 1_Testes_ARID4B:                        | 26709 downstream         | 1 | 18.000 | 1 | 1_Testes_ARID4B: |
| 1_Testes_ARID4B:                        | 143 in gene              | 1 | 29.000 | 1 | 1_Testes_ARID4B: |
| 1_Testes_ARID4B:                        | 445 in gene              | 1 | 21.000 | 1 | 1_Testes_ARID4B: |
| 1_Testes_ARID4B:                        | 139 in gene              | 1 | 38.000 | 1 | 1_Testes_ARID4B: |
| 1_Testes_ARID4B: 272723, 19048, -2520   | in gene, in gene, upstre | 1 | 27.000 | 3 | 1_Testes_ARID4B: |
| 1_Testes_ARID4B:                        | 274 in gene              | 1 | 35.000 | 1 | 1_Testes_ARID4B: |
| 1_Testes_ARID4B:                        | 107 in gene              | 1 | 32.000 | 1 | 1_Testes_ARID4B: |
| 1_Testes_ARID4B:                        | -8598 upstream           | 1 | 23.000 | 1 | 1_Testes_ARID4B: |
| 1_Testes_ARID4B: 203, 12523             | in gene, downstream      | 1 | 25.000 | 2 | 1_Testes_ARID4B: |
| 1_Testes_ARID4B:                        | 103 in gene              | 1 | 27.000 | 1 | 1_Testes_ARID4B: |
| 1_Testes_ARID4B:                        | 1010 in gene             | 1 | 22.000 | 1 | 1_Testes_ARID4B: |
| 1_Testes_ARID4B:                        | -7470 upstream           | 1 | 25.000 | 1 | 1_Testes_ARID4B: |
| 1_Testes_ARID4B: 325, 14149             | in gene, downstream      | 1 | 24.000 | 2 | 1_Testes_ARID4B: |
| 1_Testes_ARID4B:                        | -13 upstream             | 1 | 23.000 | 1 | 1_Testes_ARID4B: |
| 1_Testes_ARID4B:                        | 60426 downstream         | 1 | 31.000 | 1 | 1_Testes_ARID4B: |
| 1_Testes_ARID4B: -245, 47755            | upstream, downstream     | 1 | 31.000 | 2 | 1_Testes_ARID4B: |
| 1_Testes_ARID4B:                        | 426 in gene              | 1 | 31.000 | 1 | 1_Testes_ARID4B: |
| 1_Testes_ARID4B:                        | -455 upstream            | 1 | 31.000 | 1 | 1_Testes_ARID4B: |
| 1_Testes_ARID4B:                        | 11867 downstream         | 1 | 31.000 | 1 | 1_Testes_ARID4B: |
| 1_Testes_ARID4B:                        | 389 in gene              | 1 | 30.000 | 1 | 1_Testes_ARID4B: |
| 1_Testes_ARID4B:                        | -520 upstream            | 1 | 30.000 | 1 | 1_Testes_ARID4B: |
| 1_Testes_ARID4B:                        | -1111 upstream           | 1 | 33.000 | 1 | 1_Testes_ARID4B: |
| 1_Testes_ARID4B:                        | 75 in gene               | 1 | 33.000 | 1 | 1_Testes_ARID4B: |
| 1_Testes_ARID4B:                        | 22477 downstream         | 1 | 32.000 | 1 | 1_Testes_ARID4B: |
| 1_Testes_ARID4B:                        | 208 in gene              | 1 | 32.000 | 1 | 1_Testes_ARID4B: |
| 1_Testes_ARID4B:                        | 39483 downstream         | 1 | 19.000 | 1 | 1_Testes_ARID4B: |
| 1_Testes_ARID4B: 1395, 7539             | in gene, downstream      | 1 | 24.500 | 2 | 1_Testes_ARID4B: |
| 1_Testes_ARID4B: -5909, 235, 34859, 449 | upstream, in gene, in g  | 1 | 27.000 | 4 | 1_Testes_ARID4B: |
| 1_Testes_ARID4B: -9187, 941             | upstream, in gene        | 1 | 29.500 | 2 | 1_Testes_ARID4B: |
| 1_Testes_ARID4B:                        | 14397 downstream         | 1 | 42.000 | 1 | 1_Testes_ARID4B: |
| 1_Testes_ARID4B:                        | 134 in gene              | 1 | 28.000 | 1 | 1_Testes_ARID4B: |
| 1_Testes_ARID4B:                        | 31 in gene               | 1 | 32.000 | 1 | 1_Testes_ARID4B: |
| 1_Testes_ARID4B:                        | -6117 upstream           | 1 | 32.000 | 1 | 1_Testes_ARID4B: |
| 1_Testes_ARID4B:                        | 34678 downstream         | 1 | 41.000 | 1 | 1_Testes_ARID4B: |
| 1_Testes_ARID4B:                        | 231 in gene              | 1 | 41.000 | 1 | 1_Testes_ARID4B: |
| 1_Testes_ARID4B:                        | 3727 downstream          | 1 | 41.000 | 1 | 1_Testes_ARID4B: |



|                                        |                         |   |        |   |                  |
|----------------------------------------|-------------------------|---|--------|---|------------------|
| 1_Testes_ARID4B:                       | -2127 upstream          | 1 | 41.000 | 1 | 1_Testes_ARID4B: |
| 1_Testes_ARID4B:                       | 134 in gene             | 1 | 30.000 | 1 | 1_Testes_ARID4B: |
| 1_Testes_ARID4B:39013, -219            | downstream, upstream    | 1 | 24.500 | 2 | 1_Testes_ARID4B: |
| 1_Testes_ARID4B:                       | -126 upstream           | 1 | 21.000 | 1 | 1_Testes_ARID4B: |
| 1_Testes_ARID4B:                       | 717 in gene             | 1 | 24.000 | 1 | 1_Testes_ARID4B: |
| 1_Testes_ARID4B:17877, -203            | downstream, upstream    | 1 | 25.500 | 2 | 1_Testes_ARID4B: |
| 1_Testes_ARID4B:                       | 77 in gene              | 1 | 27.000 | 1 | 1_Testes_ARID4B: |
| 1_Testes_ARID4B:                       | 923 in gene             | 1 | 28.000 | 1 | 1_Testes_ARID4B: |
| 1_Testes_ARID4B:-727, 345, 67033, 7476 | upstream, in gene, in g | 1 | 21.000 | 4 | 1_Testes_ARID4B: |
| 1_Testes_ARID4B:-7480, 248             | upstream, in gene       | 1 | 25.500 | 2 | 1_Testes_ARID4B: |
| 1_Testes_ARID4B:                       | 73490 in gene           | 1 | 16.000 | 1 | 1_Testes_ARID4B: |
| 1_Testes_ARID4B:                       | 276 in gene             | 1 | 42.000 | 1 | 1_Testes_ARID4B: |
| 1_Testes_ARID4B:                       | 209 in gene             | 1 | 25.000 | 1 | 1_Testes_ARID4B: |
| 1_Testes_ARID4B:                       | -801 upstream           | 1 | 36.000 | 1 | 1_Testes_ARID4B: |
| 1_Testes_ARID4B:                       | 513 in gene             | 1 | 36.000 | 1 | 1_Testes_ARID4B: |
| 1_Testes_ARID4B:                       | -470 upstream           | 1 | 33.000 | 1 | 1_Testes_ARID4B: |
| 1_Testes_ARID4B:                       | 157 in gene             | 1 | 33.000 | 1 | 1_Testes_ARID4B: |
| 1_Testes_ARID4B:                       | 202 in gene             | 1 | 30.000 | 1 | 1_Testes_ARID4B: |
| 1_Testes_ARID4B:                       | -858 upstream           | 1 | 30.000 | 1 | 1_Testes_ARID4B: |
| 1_Testes_ARID4B:                       | 227 in gene             | 1 | 26.000 | 1 | 1_Testes_ARID4B: |
| 1_Testes_ARID4B:                       | 28838 downstream        | 1 | 26.000 | 1 | 1_Testes_ARID4B: |
| 1_Testes_ARID4B:                       | -232 upstream           | 1 | 33.000 | 1 | 1_Testes_ARID4B: |
| 1_Testes_ARID4B:                       | 173 in gene             | 1 | 33.000 | 1 | 1_Testes_ARID4B: |
| 1_Testes_ARID4B:                       | 13377 downstream        | 1 | 33.000 | 1 | 1_Testes_ARID4B: |
| 1_Testes_ARID4B:                       | 287 in gene             | 1 | 30.000 | 1 | 1_Testes_ARID4B: |
| 1_Testes_ARID4B:                       | 24358 downstream        | 1 | 30.000 | 1 | 1_Testes_ARID4B: |
| 1_Testes_ARID4B:                       | 383 in gene             | 1 | 37.000 | 1 | 1_Testes_ARID4B: |
| 1_Testes_ARID4B:                       | 321 in gene             | 1 | 32.000 | 1 | 1_Testes_ARID4B: |
| 1_Testes_ARID4B:                       | 39691 downstream        | 1 | 18.000 | 1 | 1_Testes_ARID4B: |
| 1_Testes_ARID4B:                       | 26 in gene              | 1 | 18.000 | 1 | 1_Testes_ARID4B: |
| 1_Testes_ARID4B:                       | 266 in gene             | 1 | 21.000 | 1 | 1_Testes_ARID4B: |
| 1_Testes_ARID4B:                       | 80 in gene              | 1 | 19.000 | 1 | 1_Testes_ARID4B: |
| 1_Testes_ARID4B:                       | 113 in gene             | 1 | 31.000 | 1 | 1_Testes_ARID4B: |
| 1_Testes_ARID4B:                       | -5354 upstream          | 1 | 28.000 | 1 | 1_Testes_ARID4B: |
| 1_Testes_ARID4B:                       | 161 in gene             | 1 | 28.000 | 1 | 1_Testes_ARID4B: |
| 1_Testes_ARID4B:-4772, -6660           | upstream, upstream      | 1 | 29.500 | 2 | 1_Testes_ARID4B: |
| 1_Testes_ARID4B:-1483, 405             | upstream, in gene       | 1 | 29.500 | 2 | 1_Testes_ARID4B: |
| 1_Testes_ARID4B:155025, 153137, 26801  | downstream, downstre    | 1 | 25.000 | 4 | 1_Testes_ARID4B: |
| 1_Testes_ARID4B:                       | 1965 in gene            | 1 | 22.000 | 1 | 1_Testes_ARID4B: |
| 1_Testes_ARID4B:                       | 256 in gene             | 1 | 34.000 | 1 | 1_Testes_ARID4B: |
| 1_Testes_ARID4B:                       | 8589 downstream         | 1 | 34.000 | 1 | 1_Testes_ARID4B: |
| 1_Testes_ARID4B:                       | 49549 downstream        | 1 | 34.000 | 1 | 1_Testes_ARID4B: |
| 1_Testes_ARID4B:16342, 438             | downstream, in gene     | 1 | 25.000 | 2 | 1_Testes_ARID4B: |
| 1_Testes_ARID4B:                       | 8374 downstream         | 1 | 23.000 | 1 | 1_Testes_ARID4B: |
| 1_Testes_ARID4B:                       | 7214 downstream         | 1 | 23.000 | 1 | 1_Testes_ARID4B: |
| 1_Testes_ARID4B:                       | 7667 downstream         | 1 | 23.000 | 1 | 1_Testes_ARID4B: |
| 1_Testes_ARID4B:77134, 222             | downstream, in gene     | 1 | 25.500 | 2 | 1_Testes_ARID4B: |

|                                         |                          |   |        |   |                  |
|-----------------------------------------|--------------------------|---|--------|---|------------------|
| 1_Testes_ARID4B:                        | 177 in gene              | 1 | 30.000 | 1 | 1_Testes_ARID4B: |
| 1_Testes_ARID4B:                        | 216 in gene              | 1 | 33.000 | 1 | 1_Testes_ARID4B: |
| 1_Testes_ARID4B: 219, -2037             | in gene, upstream        | 1 | 27.000 | 2 | 1_Testes_ARID4B: |
| 1_Testes_ARID4B: -2119, 137             | upstream, in gene        | 1 | 27.000 | 2 | 1_Testes_ARID4B: |
| 1_Testes_ARID4B:                        | 93290 downstream         | 1 | 35.000 | 1 | 1_Testes_ARID4B: |
| 1_Testes_ARID4B:                        | 210 in gene              | 1 | 35.000 | 1 | 1_Testes_ARID4B: |
| 1_Testes_ARID4B:                        | 24835 downstream         | 1 | 35.000 | 1 | 1_Testes_ARID4B: |
| 1_Testes_ARID4B:                        | 344 in gene              | 1 | 28.000 | 1 | 1_Testes_ARID4B: |
| 1_Testes_ARID4B:                        | 247 in gene              | 1 | 39.000 | 1 | 1_Testes_ARID4B: |
| 1_Testes_ARID4B:                        | 38065 downstream         | 1 | 28.000 | 1 | 1_Testes_ARID4B: |
| 1_Testes_ARID4B: 654, 27150, 50766, 543 | in gene, in gene, in gen | 1 | 26.000 | 4 | 1_Testes_ARID4B: |
| 1_Testes_ARID4B:                        | 119 in gene              | 1 | 32.000 | 1 | 1_Testes_ARID4B: |
| 1_Testes_ARID4B: 446, 10158             | in gene, in gene         | 1 | 20.500 | 2 | 1_Testes_ARID4B: |
| 1_Testes_ARID4B:                        | 12111 downstream         | 1 | 18.000 | 1 | 1_Testes_ARID4B: |
| 1_Testes_ARID4B:                        | 94 in gene               | 1 | 21.000 | 1 | 1_Testes_ARID4B: |
| 1_Testes_ARID4B:                        | 171 in gene              | 1 | 27.000 | 1 | 1_Testes_ARID4B: |
| 1_Testes_ARID4B:                        | -7534 upstream           | 1 | 27.000 | 1 | 1_Testes_ARID4B: |
| 1_Testes_ARID4B: 327, 9831              | in gene, downstream      | 1 | 29.000 | 2 | 1_Testes_ARID4B: |
| 1_Testes_ARID4B: -9301, 203             | upstream, in gene        | 1 | 29.000 | 2 | 1_Testes_ARID4B: |
| 1_Testes_ARID4B:                        | -185 upstream            | 1 | 35.000 | 1 | 1_Testes_ARID4B: |
| 1_Testes_ARID4B: 80779, 763, -768       | downstream, in gene, u   | 1 | 33.667 | 3 | 1_Testes_ARID4B: |
| 1_Testes_ARID4B:                        | 55 in gene               | 1 | 26.000 | 1 | 1_Testes_ARID4B: |
| 1_Testes_ARID4B:                        | 32928 downstream         | 1 | 26.000 | 1 | 1_Testes_ARID4B: |
| 1_Testes_ARID4B:                        | -7041 upstream           | 1 | 37.000 | 1 | 1_Testes_ARID4B: |
| 1_Testes_ARID4B: 151, -5833             | in gene, upstream        | 1 | 30.000 | 2 | 1_Testes_ARID4B: |
| 1_Testes_ARID4B: 1677, 7661             | in gene, downstream      | 1 | 30.000 | 2 | 1_Testes_ARID4B: |
| 1_Testes_ARID4B: 8666, 2682             | downstream, in gene      | 1 | 30.000 | 2 | 1_Testes_ARID4B: |
| 1_Testes_ARID4B:                        | 70 in gene               | 1 | 33.000 | 1 | 1_Testes_ARID4B: |
| 1_Testes_ARID4B:                        | 224 in gene              | 1 | 31.000 | 1 | 1_Testes_ARID4B: |
| 1_Testes_ARID4B:                        | 635 in gene              | 1 | 35.000 | 1 | 1_Testes_ARID4B: |
| 1_Testes_ARID4B:                        | 17414 downstream         | 1 | 35.000 | 1 | 1_Testes_ARID4B: |
| 1_Testes_ARID4B:                        | 194 in gene              | 1 | 35.000 | 1 | 1_Testes_ARID4B: |
| 1_Testes_ARID4B:                        | 196 in gene              | 1 | 25.000 | 1 | 1_Testes_ARID4B: |
| 1_Testes_ARID4B:                        | -415 upstream            | 1 | 36.000 | 1 | 1_Testes_ARID4B: |
| 1_Testes_ARID4B: 196, -9212             | in gene, upstream        | 1 | 40.500 | 2 | 1_Testes_ARID4B: |
| 1_Testes_ARID4B: -8905, 503, 7543       | upstream, in gene, dow   | 1 | 35.667 | 3 | 1_Testes_ARID4B: |
| 1_Testes_ARID4B: -6852, 188             | upstream, in gene        | 1 | 41.000 | 2 | 1_Testes_ARID4B: |
| 1_Testes_ARID4B:                        | 152 in gene              | 1 | 35.000 | 1 | 1_Testes_ARID4B: |
| 1_Testes_ARID4B:                        | 270 in gene              | 1 | 19.000 | 1 | 1_Testes_ARID4B: |
| 1_Testes_ARID4B:                        | 612 in gene              | 1 | 31.000 | 1 | 1_Testes_ARID4B: |
| 1_Testes_ARID4B:                        | 25460 downstream         | 1 | 26.000 | 1 | 1_Testes_ARID4B: |
| 1_Testes_ARID4B: 138, 25834             | in gene, downstream      | 1 | 25.000 | 2 | 1_Testes_ARID4B: |
| 1_Testes_ARID4B: 107, 17371, 25931      | in gene, downstream, c   | 1 | 26.333 | 3 | 1_Testes_ARID4B: |
| 1_Testes_ARID4B: -1341, 7219            | upstream, downstream     | 1 | 27.500 | 2 | 1_Testes_ARID4B: |
| 1_Testes_ARID4B: 8770, 210              | downstream, in gene      | 1 | 27.500 | 2 | 1_Testes_ARID4B: |
| 1_Testes_ARID4B:                        | 14860 downstream         | 1 | 34.000 | 1 | 1_Testes_ARID4B: |
| 1_Testes_ARID4B:                        | 369 in gene              | 1 | 19.000 | 1 | 1_Testes_ARID4B: |

|                                    |                          |   |        |   |                  |
|------------------------------------|--------------------------|---|--------|---|------------------|
| 1_Testes_ARID4B:                   | 187 in gene              | 1 | 51.000 | 1 | 1_Testes_ARID4B: |
| 1_Testes_ARID4B:                   | 82 in gene               | 1 | 33.000 | 1 | 1_Testes_ARID4B: |
| 1_Testes_ARID4B:                   | 150 in gene              | 1 | 37.000 | 1 | 1_Testes_ARID4B: |
| 1_Testes_ARID4B:                   | 4619 in gene             | 1 | 26.000 | 1 | 1_Testes_ARID4B: |
| 1_Testes_ARID4B:                   | 352 in gene              | 1 | 33.000 | 1 | 1_Testes_ARID4B: |
| 1_Testes_ARID4B: 287, 863          | in gene, in gene         | 1 | 20.000 | 2 | 1_Testes_ARID4B: |
| 1_Testes_ARID4B:                   | 14755 in gene            | 1 | 23.000 | 1 | 1_Testes_ARID4B: |
| 1_Testes_ARID4B:                   | 799 in gene              | 1 | 35.000 | 1 | 1_Testes_ARID4B: |
| 1_Testes_ARID4B:                   | 167 in gene              | 1 | 32.000 | 1 | 1_Testes_ARID4B: |
| 1_Testes_ARID4B:                   | 333 in gene              | 1 | 30.000 | 1 | 1_Testes_ARID4B: |
| 1_Testes_ARID4B:                   | 138 in gene              | 1 | 20.000 | 1 | 1_Testes_ARID4B: |
| 1_Testes_ARID4B:                   | -7075 upstream           | 1 | 19.000 | 1 | 1_Testes_ARID4B: |
| 1_Testes_ARID4B: 189, 1757         | in gene, in gene         | 1 | 29.000 | 2 | 1_Testes_ARID4B: |
| 1_Testes_ARID4B:                   | 70675 downstream         | 1 | 24.000 | 1 | 1_Testes_ARID4B: |
| 1_Testes_ARID4B: 138, 64522        | in gene, in gene         | 1 | 22.500 | 2 | 1_Testes_ARID4B: |
| 1_Testes_ARID4B:                   | 281 in gene              | 1 | 26.000 | 1 | 1_Testes_ARID4B: |
| 1_Testes_ARID4B: 195, 51411        | in gene, in gene         | 1 | 23.500 | 2 | 1_Testes_ARID4B: |
| 1_Testes_ARID4B: 80, 223952        | in gene, downstream      | 1 | 40.000 | 2 | 1_Testes_ARID4B: |
| 1_Testes_ARID4B:                   | 781 in gene              | 1 | 46.000 | 1 | 1_Testes_ARID4B: |
| 1_Testes_ARID4B:                   | 120 in gene              | 1 | 32.000 | 1 | 1_Testes_ARID4B: |
| 1_Testes_ARID4B:                   | 730 in gene              | 1 | 26.000 | 1 | 1_Testes_ARID4B: |
| 1_Testes_ARID4B:                   | 148 in gene              | 1 | 25.000 | 1 | 1_Testes_ARID4B: |
| 1_Testes_ARID4B:                   | 379 in gene              | 1 | 28.000 | 1 | 1_Testes_ARID4B: |
| 1_Testes_ARID4B:                   | 6072 downstream          | 1 | 22.000 | 1 | 1_Testes_ARID4B: |
| 1_Testes_ARID4B:                   | 279 in gene              | 1 | 22.000 | 1 | 1_Testes_ARID4B: |
| 1_Testes_ARID4B:                   | -214 upstream            | 1 | 27.000 | 1 | 1_Testes_ARID4B: |
| 1_Testes_ARID4B: 37929, 297        | downstream, in gene      | 1 | 35.500 | 2 | 1_Testes_ARID4B: |
| 1_Testes_ARID4B:                   | 157 in gene              | 1 | 18.000 | 1 | 1_Testes_ARID4B: |
| 1_Testes_ARID4B:                   | -244 upstream            | 1 | 38.000 | 1 | 1_Testes_ARID4B: |
| 1_Testes_ARID4B:                   | 200 in gene              | 1 | 38.000 | 1 | 1_Testes_ARID4B: |
| 1_Testes_ARID4B:                   | 44620 in gene            | 1 | 29.000 | 1 | 1_Testes_ARID4B: |
| 1_Testes_ARID4B: 17745, 257        | in gene, in gene         | 1 | 18.000 | 2 | 1_Testes_ARID4B: |
| 1_Testes_ARID4B: 18057, 233        | downstream, in gene      | 1 | 22.500 | 2 | 1_Testes_ARID4B: |
| 1_Testes_ARID4B:                   | -10233 upstream          | 1 | 26.000 | 1 | 1_Testes_ARID4B: |
| 1_Testes_ARID4B: 532, -8460        | in gene, upstream        | 1 | 28.500 | 2 | 1_Testes_ARID4B: |
| 1_Testes_ARID4B: -8658, 334        | upstream, in gene        | 1 | 28.500 | 2 | 1_Testes_ARID4B: |
| 1_Testes_ARID4B: 187, 7323         | in gene, in gene         | 1 | 25.500 | 2 | 1_Testes_ARID4B: |
| 1_Testes_ARID4B:                   | -8615 upstream           | 1 | 29.000 | 1 | 1_Testes_ARID4B: |
| 1_Testes_ARID4B:                   | 47 in gene               | 1 | 29.000 | 1 | 1_Testes_ARID4B: |
| 1_Testes_ARID4B: 2213, 805, -7835  | in gene, in gene, upstre | 1 | 27.667 | 3 | 1_Testes_ARID4B: |
| 1_Testes_ARID4B: 203, 1611, 10251  | in gene, downstream, c   | 1 | 27.667 | 3 | 1_Testes_ARID4B: |
| 1_Testes_ARID4B: -9778, -8370, 270 | upstream, upstream, in   | 1 | 27.667 | 3 | 1_Testes_ARID4B: |
| 1_Testes_ARID4B:                   | 6340 in gene             | 1 | 18.000 | 1 | 1_Testes_ARID4B: |
| 1_Testes_ARID4B:                   | -7959 upstream           | 1 | 17.000 | 1 | 1_Testes_ARID4B: |
| 1_Testes_ARID4B:                   | -2758 upstream           | 1 | 17.000 | 1 | 1_Testes_ARID4B: |
| 1_Testes_ARID4B: 37523, 563        | in gene, in gene         | 1 | 19.000 | 2 | 1_Testes_ARID4B: |
| 1_Testes_ARID4B:                   | 171 in gene              | 1 | 19.000 | 1 | 1_Testes_ARID4B: |

|                                        |                          |   |        |   |                  |
|----------------------------------------|--------------------------|---|--------|---|------------------|
| 1_Testes_ARID4B:                       | -140 upstream            | 1 | 31.000 | 1 | 1_Testes_ARID4B: |
| 1_Testes_ARID4B:                       | -2828 upstream           | 1 | 31.000 | 1 | 1_Testes_ARID4B: |
| 1_Testes_ARID4B:                       | 152 in gene              | 1 | 33.000 | 1 | 1_Testes_ARID4B: |
| 1_Testes_ARID4B:                       | 80 in gene               | 1 | 23.000 | 1 | 1_Testes_ARID4B: |
| 1_Testes_ARID4B:                       | -74 upstream             | 1 | 23.000 | 1 | 1_Testes_ARID4B: |
| 1_Testes_ARID4B:                       | 41 in gene               | 1 | 24.000 | 1 | 1_Testes_ARID4B: |
| 1_Testes_ARID4B: 50757, 469            | in gene, in gene         | 1 | 25.000 | 2 | 1_Testes_ARID4B: |
| 1_Testes_ARID4B:                       | 618 in gene              | 1 | 22.000 | 1 | 1_Testes_ARID4B: |
| 1_Testes_ARID4B:                       | 869 in gene              | 1 | 17.000 | 1 | 1_Testes_ARID4B: |
| 1_Testes_ARID4B:                       | -4352 upstream           | 1 | 32.000 | 1 | 1_Testes_ARID4B: |
| 1_Testes_ARID4B:                       | -7133 upstream           | 1 | 21.000 | 1 | 1_Testes_ARID4B: |
| 1_Testes_ARID4B:                       | -4552 upstream           | 1 | 25.000 | 1 | 1_Testes_ARID4B: |
| 1_Testes_ARID4B:                       | 433 in gene              | 1 | 25.000 | 1 | 1_Testes_ARID4B: |
| 1_Testes_ARID4B:                       | 160 in gene              | 1 | 26.000 | 1 | 1_Testes_ARID4B: |
| 1_Testes_ARID4B:                       | 42794 downstream         | 1 | 26.000 | 1 | 1_Testes_ARID4B: |
| 1_Testes_ARID4B: 110106, 115450        | downstream, downstre     | 1 | 24.500 | 2 | 1_Testes_ARID4B: |
| 1_Testes_ARID4B: 261, 5605, 33349      | in gene, in gene, downst | 1 | 30.333 | 3 | 1_Testes_ARID4B: |
| 1_Testes_ARID4B:                       | 263 in gene              | 1 | 42.000 | 1 | 1_Testes_ARID4B: |
| 1_Testes_ARID4B:                       | 436 in gene              | 1 | 35.000 | 1 | 1_Testes_ARID4B: |
| 1_Testes_ARID4B:                       | 68 in gene               | 1 | 19.000 | 1 | 1_Testes_ARID4B: |
| 1_Testes_ARID4B:                       | -4409 upstream           | 1 | 19.000 | 1 | 1_Testes_ARID4B: |
| 1_Testes_ARID4B:                       | 96 in gene               | 1 | 26.000 | 1 | 1_Testes_ARID4B: |
| 1_Testes_ARID4B:                       | 211 in gene              | 1 | 33.000 | 1 | 1_Testes_ARID4B: |
| 1_Testes_ARID4B: 141202, 338           | downstream, in gene      | 1 | 31.000 | 2 | 1_Testes_ARID4B: |
| 1_Testes_ARID4B:                       | 407 in gene              | 1 | 31.000 | 1 | 1_Testes_ARID4B: |
| 1_Testes_ARID4B:                       | -106 upstream            | 1 | 29.000 | 1 | 1_Testes_ARID4B: |
| 1_Testes_ARID4B:                       | -85 upstream             | 1 | 29.000 | 1 | 1_Testes_ARID4B: |
| 1_Testes_ARID4B:                       | 347 in gene              | 1 | 37.000 | 1 | 1_Testes_ARID4B: |
| 1_Testes_ARID4B:                       | 382 in gene              | 1 | 33.000 | 1 | 1_Testes_ARID4B: |
| 1_Testes_ARID4B:                       | 479 in gene              | 1 | 28.000 | 1 | 1_Testes_ARID4B: |
| 1_Testes_ARID4B:                       | 337 in gene              | 1 | 33.000 | 1 | 1_Testes_ARID4B: |
| 1_Testes_ARID4B:                       | 288020 in gene           | 1 | 20.000 | 1 | 1_Testes_ARID4B: |
| 1_Testes_ARID4B:                       | -155 upstream            | 1 | 23.000 | 1 | 1_Testes_ARID4B: |
| 1_Testes_ARID4B:                       | 13 in gene               | 1 | 23.000 | 1 | 1_Testes_ARID4B: |
| 1_Testes_ARID4B:                       | 11553 in gene            | 1 | 18.000 | 1 | 1_Testes_ARID4B: |
| 1_Testes_ARID4B:                       | 142 in gene              | 1 | 27.000 | 1 | 1_Testes_ARID4B: |
| 1_Testes_ARID4B: 13473, 225            | downstream, in gene      | 1 | 27.000 | 2 | 1_Testes_ARID4B: |
| 1_Testes_ARID4B: 804040, 753448, 25703 | downstream, in gene, in  | 1 | 24.000 | 5 | 1_Testes_ARID4B: |
| 1_Testes_ARID4B:                       | 303 in gene              | 1 | 28.000 | 1 | 1_Testes_ARID4B: |
| 1_Testes_ARID4B: -8, 55016             | upstream, downstream     | 1 | 34.500 | 2 | 1_Testes_ARID4B: |
| 1_Testes_ARID4B: 250, -5862, -6950     | in gene, upstream, upst  | 1 | 34.000 | 3 | 1_Testes_ARID4B: |
| 1_Testes_ARID4B: 7443, 1331, 243       | downstream, in gene, in  | 1 | 34.000 | 3 | 1_Testes_ARID4B: |
| 1_Testes_ARID4B: 373, 18533            | in gene, downstream      | 1 | 38.000 | 2 | 1_Testes_ARID4B: |
| 1_Testes_ARID4B: 18407, 247            | downstream, in gene      | 1 | 38.000 | 2 | 1_Testes_ARID4B: |
| 1_Testes_ARID4B: 11066, -870           | downstream, upstream     | 1 | 39.000 | 2 | 1_Testes_ARID4B: |
| 1_Testes_ARID4B:                       | 33 in gene               | 1 | 48.000 | 1 | 1_Testes_ARID4B: |
| 1_Testes_ARID4B:                       | 29489 downstream         | 1 | 25.000 | 1 | 1_Testes_ARID4B: |

|                                         |                          |   |        |   |                  |
|-----------------------------------------|--------------------------|---|--------|---|------------------|
| 1_Testes_ARID4B:                        | 9865 downstream          | 1 | 25.000 | 1 | 1_Testes_ARID4B: |
| 1_Testes_ARID4B: 25999, 20847, 13071, 4 | in gene, in gene, in gen | 1 | 19.250 | 4 | 1_Testes_ARID4B: |
| 1_Testes_ARID4B:                        | 5404 downstream          | 1 | 17.000 | 1 | 1_Testes_ARID4B: |
| 1_Testes_ARID4B:                        | -6707 upstream           | 1 | 17.000 | 1 | 1_Testes_ARID4B: |
| 1_Testes_ARID4B:                        | -324 upstream            | 1 | 23.000 | 1 | 1_Testes_ARID4B: |
| 1_Testes_ARID4B:                        | 9030 in gene             | 1 | 21.000 | 1 | 1_Testes_ARID4B: |
| 1_Testes_ARID4B: 8270, -6034            | downstream, upstream     | 1 | 28.500 | 2 | 1_Testes_ARID4B: |
| 1_Testes_ARID4B:                        | 482 in gene              | 1 | 36.000 | 1 | 1_Testes_ARID4B: |
| 1_Testes_ARID4B: 20929, -7359           | downstream, upstream     | 1 | 31.500 | 2 | 1_Testes_ARID4B: |
| 1_Testes_ARID4B:                        | 106 in gene              | 1 | 27.000 | 1 | 1_Testes_ARID4B: |
| 1_Testes_ARID4B:                        | 782 in gene              | 1 | 21.000 | 1 | 1_Testes_ARID4B: |
| 1_Testes_ARID4B:                        | -7156 upstream           | 1 | 27.000 | 1 | 1_Testes_ARID4B: |
| 1_Testes_ARID4B:                        | 395 in gene              | 1 | 27.000 | 1 | 1_Testes_ARID4B: |
| 1_Testes_ARID4B: 17449, 233             | downstream, in gene      | 1 | 30.500 | 2 | 1_Testes_ARID4B: |
| 1_Testes_ARID4B: -713, 36663            | upstream, downstream     | 1 | 32.000 | 2 | 1_Testes_ARID4B: |
| 1_Testes_ARID4B:                        | 421 in gene              | 1 | 30.000 | 1 | 1_Testes_ARID4B: |
| 1_Testes_ARID4B:                        | 13820 downstream         | 1 | 30.000 | 1 | 1_Testes_ARID4B: |
| 1_Testes_ARID4B: 18044, 18652           | downstream, downstre     | 1 | 25.500 | 2 | 1_Testes_ARID4B: |
| 1_Testes_ARID4B: 268, -340              | in gene, upstream        | 1 | 25.500 | 2 | 1_Testes_ARID4B: |
| 1_Testes_ARID4B: -9689, 407             | upstream, in gene        | 1 | 24.500 | 2 | 1_Testes_ARID4B: |
| 1_Testes_ARID4B:                        | 1241 in gene             | 1 | 18.000 | 1 | 1_Testes_ARID4B: |
| 1_Testes_ARID4B:                        | 735 in gene              | 1 | 18.000 | 1 | 1_Testes_ARID4B: |
| 1_Testes_ARID4B:                        | -1282 upstream           | 1 | 18.000 | 1 | 1_Testes_ARID4B: |
| 1_Testes_ARID4B: 389, 3749              | in gene, downstream      | 1 | 24.500 | 2 | 1_Testes_ARID4B: |
| 1_Testes_ARID4B: -2821, 539             | upstream, in gene        | 1 | 24.500 | 2 | 1_Testes_ARID4B: |
| 1_Testes_ARID4B:                        | -423 upstream            | 1 | 42.000 | 1 | 1_Testes_ARID4B: |
| 1_Testes_ARID4B: 143, 64303             | in gene, downstream      | 1 | 32.500 | 2 | 1_Testes_ARID4B: |
| 1_Testes_ARID4B: 71655, 583             | downstream, in gene      | 1 | 40.500 | 2 | 1_Testes_ARID4B: |
| 1_Testes_ARID4B:                        | -9730 upstream           | 1 | 58.000 | 1 | 1_Testes_ARID4B: |
| 1_Testes_ARID4B:                        | 178 in gene              | 1 | 24.000 | 1 | 1_Testes_ARID4B: |
| 1_Testes_ARID4B:                        | 111247 downstream        | 1 | 24.000 | 1 | 1_Testes_ARID4B: |
| 1_Testes_ARID4B:                        | 959 in gene              | 1 | 32.000 | 1 | 1_Testes_ARID4B: |
| 1_Testes_ARID4B: 28155, 29979           | downstream, downstre     | 1 | 23.500 | 2 | 1_Testes_ARID4B: |
| 1_Testes_ARID4B: 360, -1464             | in gene, upstream        | 1 | 23.500 | 2 | 1_Testes_ARID4B: |
| 1_Testes_ARID4B: 16230, 14406, 454      | downstream, in gene, in  | 1 | 22.333 | 3 | 1_Testes_ARID4B: |
| 1_Testes_ARID4B: 527, 10858             | in gene, downstream      | 1 | 36.000 | 2 | 1_Testes_ARID4B: |
| 1_Testes_ARID4B: -9946, 385             | upstream, in gene        | 1 | 36.000 | 2 | 1_Testes_ARID4B: |
| 1_Testes_ARID4B:                        | 186 in gene              | 1 | 41.000 | 1 | 1_Testes_ARID4B: |
| 1_Testes_ARID4B:                        | -280 upstream            | 1 | 41.000 | 1 | 1_Testes_ARID4B: |
| 1_Testes_ARID4B: 13649, -9855           | downstream, upstream     | 1 | 35.000 | 2 | 1_Testes_ARID4B: |
| 1_Testes_ARID4B:                        | 1458 in gene             | 1 | 29.000 | 1 | 1_Testes_ARID4B: |
| 1_Testes_ARID4B:                        | -6756 upstream           | 1 | 29.000 | 1 | 1_Testes_ARID4B: |
| 1_Testes_ARID4B: 94, 9054               | in gene, downstream      | 1 | 32.500 | 2 | 1_Testes_ARID4B: |
| 1_Testes_ARID4B: -8777, 183, 19159      | upstream, in gene, dow   | 1 | 32.333 | 3 | 1_Testes_ARID4B: |
| 1_Testes_ARID4B:                        | 379 in gene              | 1 | 32.000 | 1 | 1_Testes_ARID4B: |
| 1_Testes_ARID4B: -8032, 8224            | upstream, downstream     | 1 | 32.000 | 2 | 1_Testes_ARID4B: |
| 1_Testes_ARID4B: 492, 12076, 22156      | in gene, downstream, c   | 1 | 27.000 | 3 | 1_Testes_ARID4B: |

|                                     |                        |          |                    |
|-------------------------------------|------------------------|----------|--------------------|
| 1_Testes_ARID4B: 3865, -6215        | in gene, upstream      | 1 24.500 | 2 1_Testes_ARID4B: |
| 1_Testes_ARID4B: 9952, -128         | downstream, upstream   | 1 24.500 | 2 1_Testes_ARID4B: |
| 1_Testes_ARID4B: -10079, 1, 22497   | upstream, in gene, dow | 1 28.333 | 3 1_Testes_ARID4B: |
| 1_Testes_ARID4B:                    | -302 upstream          | 1 36.000 | 1 1_Testes_ARID4B: |
| 1_Testes_ARID4B:                    | 189 in gene            | 1 36.000 | 1 1_Testes_ARID4B: |
| 1_Testes_ARID4B:                    | 9 in gene              | 1 34.000 | 1 1_Testes_ARID4B: |
| 1_Testes_ARID4B:                    | 294 in gene            | 1 49.000 | 1 1_Testes_ARID4B: |
| 1_Testes_ARID4B:                    | -530 upstream          | 1 49.000 | 1 1_Testes_ARID4B: |
| 1_Testes_ARID4B: 40264, 288         | downstream, in gene    | 1 20.500 | 2 1_Testes_ARID4B: |
| 1_Testes_ARID4B:                    | 3618 downstream        | 1 24.000 | 1 1_Testes_ARID4B: |
| 1_Testes_ARID4B:                    | -6084 upstream         | 1 24.000 | 1 1_Testes_ARID4B: |
| 1_Testes_ARID4B:                    | -6370 upstream         | 1 24.000 | 1 1_Testes_ARID4B: |
| 1_Testes_ARID4B:                    | -55 upstream           | 1 24.000 | 1 1_Testes_ARID4B: |
| 1_Testes_ARID4B:                    | -1098 upstream         | 1 24.000 | 1 1_Testes_ARID4B: |
| 1_Testes_ARID4B: -2760, -1656, -472 | upstream, upstream, u  | 1 21.667 | 3 1_Testes_ARID4B: |
| 1_Testes_ARID4B:                    | 165 in gene            | 1 33.000 | 1 1_Testes_ARID4B: |
| 1_Testes_ARID4B:                    | -221 upstream          | 1 33.000 | 1 1_Testes_ARID4B: |
| 1_Testes_ARID4B:                    | 198 in gene            | 1 20.000 | 1 1_Testes_ARID4B: |
| 1_Testes_ARID4B:                    | 473 in gene            | 1 35.000 | 1 1_Testes_ARID4B: |
| 1_Testes_ARID4B:                    | 1096 in gene           | 1 26.000 | 1 1_Testes_ARID4B: |
| 1_Testes_ARID4B:                    | 69 in gene             | 1 21.000 | 1 1_Testes_ARID4B: |
| 1_Testes_ARID4B:                    | 284 in gene            | 1 17.000 | 1 1_Testes_ARID4B: |
| 1_Testes_ARID4B:                    | -418 upstream          | 1 17.000 | 1 1_Testes_ARID4B: |
| 1_Testes_ARID4B:                    | 307 in gene            | 1 19.000 | 1 1_Testes_ARID4B: |
| 1_Testes_ARID4B:                    | -6 upstream            | 1 20.000 | 1 1_Testes_ARID4B: |
| 1_Testes_ARID4B:                    | 287 in gene            | 1 21.000 | 1 1_Testes_ARID4B: |
| 1_Testes_ARID4B:                    | 656 in gene            | 1 20.000 | 1 1_Testes_ARID4B: |
| 1_Testes_ARID4B:                    | -134 upstream          | 1 20.000 | 1 1_Testes_ARID4B: |
| 1_Testes_ARID4B:                    | 338 in gene            | 1 25.000 | 1 1_Testes_ARID4B: |
| 1_Testes_ARID4B:                    | 378 in gene            | 1 19.000 | 1 1_Testes_ARID4B: |
| 1_Testes_ARID4B:                    | 253 in gene            | 1 30.000 | 1 1_Testes_ARID4B: |
| 1_Testes_ARID4B:                    | -809 upstream          | 1 19.000 | 1 1_Testes_ARID4B: |
| 1_Testes_ARID4B: 442, 1475034       | in gene, in gene       | 1 18.000 | 2 1_Testes_ARID4B: |
| 1_Testes_ARID4B:                    | 302 in gene            | 1 32.000 | 1 1_Testes_ARID4B: |
| 1_Testes_ARID4B:                    | 531 in gene            | 1 32.000 | 1 1_Testes_ARID4B: |
| 1_Testes_ARID4B:                    | 533 in gene            | 1 39.000 | 1 1_Testes_ARID4B: |
| 1_Testes_ARID4B: 125, -1747         | in gene, upstream      | 1 28.500 | 2 1_Testes_ARID4B: |
| 1_Testes_ARID4B: -243, 1629         | upstream, in gene      | 1 28.500 | 2 1_Testes_ARID4B: |
| 1_Testes_ARID4B:                    | -271 upstream          | 1 34.000 | 1 1_Testes_ARID4B: |
| 1_Testes_ARID4B:                    | 195 in gene            | 1 34.000 | 1 1_Testes_ARID4B: |
| 1_Testes_ARID4B:                    | 187 in gene            | 1 37.000 | 1 1_Testes_ARID4B: |
| 1_Testes_ARID4B:                    | -9775 upstream         | 1 37.000 | 1 1_Testes_ARID4B: |
| 1_Testes_ARID4B:                    | -1404 upstream         | 1 37.000 | 1 1_Testes_ARID4B: |
| 1_Testes_ARID4B:                    | 173 in gene            | 1 26.000 | 1 1_Testes_ARID4B: |
| 1_Testes_ARID4B:                    | -4256 upstream         | 1 26.000 | 1 1_Testes_ARID4B: |
| 1_Testes_ARID4B:                    | 155 in gene            | 1 43.000 | 1 1_Testes_ARID4B: |
| 1_Testes_ARID4B: 293, 64498         | in gene, downstream    | 1 24.000 | 2 1_Testes_ARID4B: |

|                                   |                        |   |        |   |                  |
|-----------------------------------|------------------------|---|--------|---|------------------|
| 1_Testes_ARID4B:                  | 125 in gene            | 1 | 28.000 | 1 | 1_Testes_ARID4B: |
| 1_Testes_ARID4B:                  | 3268 in gene           | 1 | 29.000 | 1 | 1_Testes_ARID4B: |
| 1_Testes_ARID4B:                  | 23421 downstream       | 1 | 21.000 | 1 | 1_Testes_ARID4B: |
| 1_Testes_ARID4B:                  | 3903 in gene           | 1 | 21.000 | 1 | 1_Testes_ARID4B: |
| 1_Testes_ARID4B:                  | -5916 upstream         | 1 | 21.000 | 1 | 1_Testes_ARID4B: |
| 1_Testes_ARID4B:                  | -7277 upstream         | 1 | 28.000 | 1 | 1_Testes_ARID4B: |
| 1_Testes_ARID4B:                  | -4666 upstream         | 1 | 28.000 | 1 | 1_Testes_ARID4B: |
| 1_Testes_ARID4B: 335, 22543       | in gene, in gene       | 1 | 27.500 | 2 | 1_Testes_ARID4B: |
| 1_Testes_ARID4B: 123, -9365       | in gene, upstream      | 1 | 25.500 | 2 | 1_Testes_ARID4B: |
| 1_Testes_ARID4B: 4561, -4927      | downstream, upstream   | 1 | 25.500 | 2 | 1_Testes_ARID4B: |
| 1_Testes_ARID4B: -9406, 82, 15874 | upstream, in gene, dow | 1 | 25.333 | 3 | 1_Testes_ARID4B: |
| 1_Testes_ARID4B: -5282, 10510     | upstream, downstream   | 1 | 27.000 | 2 | 1_Testes_ARID4B: |
| 1_Testes_ARID4B: 15170, -622      | downstream, upstream   | 1 | 27.000 | 2 | 1_Testes_ARID4B: |
| 1_Testes_ARID4B:                  | 520 in gene            | 1 | 27.000 | 1 | 1_Testes_ARID4B: |
| 1_Testes_ARID4B:                  | 121 in gene            | 1 | 35.000 | 1 | 1_Testes_ARID4B: |
| 1_Testes_ARID4B:                  | -302 upstream          | 1 | 23.000 | 1 | 1_Testes_ARID4B: |
| 1_Testes_ARID4B:                  | -31 upstream           | 1 | 23.000 | 1 | 1_Testes_ARID4B: |
| 1_Testes_ARID4B: 703, -609        | in gene, upstream      | 1 | 29.000 | 2 | 1_Testes_ARID4B: |
| 1_Testes_ARID4B: -1717, -405      | upstream, upstream     | 1 | 29.000 | 2 | 1_Testes_ARID4B: |
| 1_Testes_ARID4B:                  | 46 in gene             | 1 | 27.000 | 1 | 1_Testes_ARID4B: |
| 1_Testes_ARID4B:                  | -2744 upstream         | 1 | 17.000 | 1 | 1_Testes_ARID4B: |
| 1_Testes_ARID4B:                  | -437 upstream          | 1 | 27.000 | 1 | 1_Testes_ARID4B: |
| 1_Testes_ARID4B:                  | -20 upstream           | 1 | 30.000 | 1 | 1_Testes_ARID4B: |
| 1_Testes_ARID4B:                  | 1088 in gene           | 1 | 18.000 | 1 | 1_Testes_ARID4B: |
| 1_Testes_ARID4B:                  | -197 upstream          | 1 | 33.000 | 1 | 1_Testes_ARID4B: |
| 1_Testes_ARID4B:                  | 230 in gene            | 1 | 20.000 | 1 | 1_Testes_ARID4B: |
| 1_Testes_ARID4B:                  | -305 upstream          | 1 | 20.000 | 1 | 1_Testes_ARID4B: |
| 1_Testes_ARID4B:                  | 390 in gene            | 1 | 24.000 | 1 | 1_Testes_ARID4B: |
| 1_Testes_ARID4B:                  | -192 upstream          | 1 | 27.000 | 1 | 1_Testes_ARID4B: |
| 1_Testes_ARID4B:                  | 230 in gene            | 1 | 27.000 | 1 | 1_Testes_ARID4B: |
| 1_Testes_ARID4B:                  | -508 upstream          | 1 | 25.000 | 1 | 1_Testes_ARID4B: |
| 1_Testes_ARID4B:                  | 166 in gene            | 1 | 25.000 | 1 | 1_Testes_ARID4B: |
| 1_Testes_ARID4B:                  | 203 in gene            | 1 | 22.000 | 1 | 1_Testes_ARID4B: |
| 1_Testes_ARID4B:                  | 246 in gene            | 1 | 22.000 | 1 | 1_Testes_ARID4B: |
| 1_Testes_ARID4B: 173, 19133       | in gene, downstream    | 1 | 22.000 | 2 | 1_Testes_ARID4B: |
| 1_Testes_ARID4B:                  | 170 in gene            | 1 | 26.000 | 1 | 1_Testes_ARID4B: |
| 1_Testes_ARID4B: -84, 55036       | upstream, downstream   | 1 | 27.000 | 2 | 1_Testes_ARID4B: |
| 1_Testes_ARID4B:                  | -948 upstream          | 1 | 24.000 | 1 | 1_Testes_ARID4B: |
| 1_Testes_ARID4B:                  | 145 in gene            | 1 | 30.000 | 1 | 1_Testes_ARID4B: |
| 1_Testes_ARID4B: 19084, 25548     | downstream, downstre   | 1 | 22.000 | 2 | 1_Testes_ARID4B: |
| 1_Testes_ARID4B: -148, -6612      | upstream, upstream     | 1 | 22.000 | 2 | 1_Testes_ARID4B: |
| 1_Testes_ARID4B: -5850, 614       | upstream, in gene      | 1 | 22.000 | 2 | 1_Testes_ARID4B: |
| 1_Testes_ARID4B:                  | -7495 upstream         | 1 | 19.000 | 1 | 1_Testes_ARID4B: |
| 1_Testes_ARID4B:                  | 21884 downstream       | 1 | 27.000 | 1 | 1_Testes_ARID4B: |
| 1_Testes_ARID4B:                  | 399 in gene            | 1 | 27.000 | 1 | 1_Testes_ARID4B: |
| 1_Testes_ARID4B:                  | 15746 downstream       | 1 | 27.000 | 1 | 1_Testes_ARID4B: |
| 1_Testes_ARID4B:                  | -7293 upstream         | 1 | 25.000 | 1 | 1_Testes_ARID4B: |

|                                |        |                      |   |        |   |                  |
|--------------------------------|--------|----------------------|---|--------|---|------------------|
| 1_Testes_ARID4B:               | 7128   | downstream           | 1 | 25.000 | 1 | 1_Testes_ARID4B: |
| 1_Testes_ARID4B:               | 1871   | in gene              | 1 | 25.000 | 1 | 1_Testes_ARID4B: |
| 1_Testes_ARID4B: 20113, 385    |        | downstream, in gene  | 1 | 30.000 | 2 | 1_Testes_ARID4B: |
| 1_Testes_ARID4B: -6, 618       |        | upstream, in gene    | 1 | 23.000 | 2 | 1_Testes_ARID4B: |
| 1_Testes_ARID4B:               | -10170 | upstream             | 1 | 19.000 | 1 | 1_Testes_ARID4B: |
| 1_Testes_ARID4B:               | -4598  | upstream             | 1 | 21.000 | 1 | 1_Testes_ARID4B: |
| 1_Testes_ARID4B:               | 165    | in gene              | 1 | 21.000 | 1 | 1_Testes_ARID4B: |
| 1_Testes_ARID4B:               | -1869  | upstream             | 1 | 21.000 | 1 | 1_Testes_ARID4B: |
| 1_Testes_ARID4B:               | 113    | in gene              | 1 | 29.000 | 1 | 1_Testes_ARID4B: |
| 1_Testes_ARID4B: 83546, -118   |        | downstream, upstream | 1 | 32.000 | 2 | 1_Testes_ARID4B: |
| 1_Testes_ARID4B:               | -322   | upstream             | 1 | 35.000 | 1 | 1_Testes_ARID4B: |
| 1_Testes_ARID4B: -77, -3373    |        | upstream, upstream   | 1 | 29.500 | 2 | 1_Testes_ARID4B: |
| 1_Testes_ARID4B: -3224, 72     |        | upstream, in gene    | 1 | 29.500 | 2 | 1_Testes_ARID4B: |
| 1_Testes_ARID4B:               | 221    | in gene              | 1 | 29.000 | 1 | 1_Testes_ARID4B: |
| 1_Testes_ARID4B:               | 26     | in gene              | 1 | 23.000 | 1 | 1_Testes_ARID4B: |
| 1_Testes_ARID4B: 68630, 118    |        | downstream, in gene  | 1 | 26.000 | 2 | 1_Testes_ARID4B: |
| 1_Testes_ARID4B:               | -9609  | upstream             | 1 | 29.000 | 1 | 1_Testes_ARID4B: |
| 1_Testes_ARID4B: -384, 576     |        | upstream, in gene    | 1 | 19.000 | 2 | 1_Testes_ARID4B: |
| 1_Testes_ARID4B:               | 364    | in gene              | 1 | 31.000 | 1 | 1_Testes_ARID4B: |
| 1_Testes_ARID4B:               | 18     | in gene              | 1 | 38.000 | 1 | 1_Testes_ARID4B: |
| 1_Testes_ARID4B:               | 5544   | downstream           | 1 | 38.000 | 1 | 1_Testes_ARID4B: |
| 1_Testes_ARID4B:               | -5859  | upstream             | 1 | 38.000 | 1 | 1_Testes_ARID4B: |
| 1_Testes_ARID4B:               | 1423   | in gene              | 1 | 23.000 | 1 | 1_Testes_ARID4B: |
| 1_Testes_ARID4B:               | 208    | in gene              | 1 | 27.000 | 1 | 1_Testes_ARID4B: |
| 1_Testes_ARID4B:               | 210    | in gene              | 1 | 42.000 | 1 | 1_Testes_ARID4B: |
| 1_Testes_ARID4B:               | 254    | in gene              | 1 | 23.000 | 1 | 1_Testes_ARID4B: |
| 1_Testes_ARID4B:               | 1392   | in gene              | 1 | 18.000 | 1 | 1_Testes_ARID4B: |
| 1_Testes_ARID4B:               | 172072 | downstream           | 1 | 18.000 | 1 | 1_Testes_ARID4B: |
| 1_Testes_ARID4B:               | 1012   | in gene              | 1 | 23.000 | 1 | 1_Testes_ARID4B: |
| 1_Testes_ARID4B: -10197, 38971 |        | upstream, downstream | 1 | 24.000 | 2 | 1_Testes_ARID4B: |
| 1_Testes_ARID4B:               | 90     | in gene              | 1 | 25.000 | 1 | 1_Testes_ARID4B: |
| 1_Testes_ARID4B:               | 187    | in gene              | 1 | 36.000 | 1 | 1_Testes_ARID4B: |
| 1_Testes_ARID4B:               | 47896  | downstream           | 1 | 19.000 | 1 | 1_Testes_ARID4B: |
| 1_Testes_ARID4B: -34, 63086    |        | upstream, downstream | 1 | 24.000 | 2 | 1_Testes_ARID4B: |
| 1_Testes_ARID4B:               | 314    | in gene              | 1 | 29.000 | 1 | 1_Testes_ARID4B: |
| 1_Testes_ARID4B:               | 23348  | downstream           | 1 | 29.000 | 1 | 1_Testes_ARID4B: |
| 1_Testes_ARID4B:               | 147156 | in gene              | 1 | 19.000 | 1 | 1_Testes_ARID4B: |
| 1_Testes_ARID4B:               | -7019  | upstream             | 1 | 19.000 | 1 | 1_Testes_ARID4B: |
| 1_Testes_ARID4B:               | 248    | in gene              | 1 | 26.000 | 1 | 1_Testes_ARID4B: |
| 1_Testes_ARID4B:               | -3556  | upstream             | 1 | 19.000 | 1 | 1_Testes_ARID4B: |
| 1_Testes_ARID4B:               | 2915   | in gene              | 1 | 19.000 | 1 | 1_Testes_ARID4B: |
| 1_Testes_ARID4B:               | 62     | in gene              | 1 | 27.000 | 1 | 1_Testes_ARID4B: |
| 1_Testes_ARID4B:               | 13755  | downstream           | 1 | 27.000 | 1 | 1_Testes_ARID4B: |
| 1_Testes_ARID4B:               | -8052  | upstream             | 1 | 27.000 | 1 | 1_Testes_ARID4B: |
| 1_Testes_ARID4B: 5126, 454     |        | in gene, in gene     | 1 | 22.500 | 2 | 1_Testes_ARID4B: |
| 1_Testes_ARID4B:               | 23020  | in gene              | 1 | 16.000 | 1 | 1_Testes_ARID4B: |
| 1_Testes_ARID4B:               | 135688 | downstream           | 1 | 25.000 | 1 | 1_Testes_ARID4B: |



|                                |                     |   |        |   |                  |
|--------------------------------|---------------------|---|--------|---|------------------|
| 1_Testes_ARID4B:               | 249 in gene         | 1 | 25.000 | 1 | 1_Testes_ARID4B: |
| 1_Testes_ARID4B:               | 59 in gene          | 1 | 33.000 | 1 | 1_Testes_ARID4B: |
| 1_Testes_ARID4B:               | 18687 downstream    | 1 | 37.000 | 1 | 1_Testes_ARID4B: |
| 1_Testes_ARID4B:               | 413 in gene         | 1 | 37.000 | 1 | 1_Testes_ARID4B: |
| 1_Testes_ARID4B:               | -716 upstream       | 1 | 37.000 | 1 | 1_Testes_ARID4B: |
| 1_Testes_ARID4B: 102354, 55794 | downstream, in gene | 1 | 27.500 | 2 | 1_Testes_ARID4B: |
| 1_Testes_ARID4B:               | 375 in gene         | 1 | 33.000 | 1 | 1_Testes_ARID4B: |
| 1_Testes_ARID4B:               | 578 in gene         | 1 | 21.000 | 1 | 1_Testes_ARID4B: |
| 1_Testes_ARID4B: 34473, 57     | downstream, in gene | 1 | 23.500 | 2 | 1_Testes_ARID4B: |
| 1_Testes_ARID4B:               | 304 in gene         | 1 | 16.000 | 1 | 1_Testes_ARID4B: |
| 1_Testes_ARID4B:               | 113 in gene         | 1 | 27.000 | 1 | 1_Testes_ARID4B: |
| 1_Testes_ARID4B:               | -1710 upstream      | 1 | 27.000 | 1 | 1_Testes_ARID4B: |
| 1_Testes_ARID4B:               | 345 in gene         | 1 | 19.000 | 1 | 1_Testes_ARID4B: |
| 1_Testes_ARID4B:               | 3676 downstream     | 1 | 19.000 | 1 | 1_Testes_ARID4B: |
| 1_Testes_ARID4B:               | 173 in gene         | 1 | 24.000 | 1 | 1_Testes_ARID4B: |
| 1_Testes_ARID4B:               | 459 in gene         | 1 | 20.000 | 1 | 1_Testes_ARID4B: |
| 1_Testes_ARID4B:               | 33 in gene          | 1 | 21.000 | 1 | 1_Testes_ARID4B: |
| 1_Testes_ARID4B:               | -87 upstream        | 1 | 21.000 | 1 | 1_Testes_ARID4B: |
| 1_Testes_ARID4B:               | 9 in gene           | 1 | 18.000 | 1 | 1_Testes_ARID4B: |
| 1_Testes_ARID4B:               | 363 in gene         | 1 | 22.000 | 1 | 1_Testes_ARID4B: |
| 1_Testes_ARID4B:               | 570 in gene         | 1 | 23.000 | 1 | 1_Testes_ARID4B: |
| 1_Testes_ARID4B:               | 283 in gene         | 1 | 30.000 | 1 | 1_Testes_ARID4B: |
| 1_Testes_ARID4B:               | -69 upstream        | 1 | 21.000 | 1 | 1_Testes_ARID4B: |
| 1_Testes_ARID4B:               | 1626 in gene        | 1 | 33.000 | 1 | 1_Testes_ARID4B: |
| 1_Testes_ARID4B:               | 265 in gene         | 1 | 33.000 | 1 | 1_Testes_ARID4B: |
| 1_Testes_ARID4B:               | -187 upstream       | 1 | 32.000 | 1 | 1_Testes_ARID4B: |
| 1_Testes_ARID4B: 114, 26978    | in gene, downstream | 1 | 28.500 | 2 | 1_Testes_ARID4B: |
| 1_Testes_ARID4B:               | 123 in gene         | 1 | 29.000 | 1 | 1_Testes_ARID4B: |
| 1_Testes_ARID4B: 119149, 77    | downstream, in gene | 1 | 27.000 | 2 | 1_Testes_ARID4B: |
| 1_Testes_ARID4B:               | -308 upstream       | 1 | 33.000 | 1 | 1_Testes_ARID4B: |
| 1_Testes_ARID4B:               | 91 in gene          | 1 | 33.000 | 1 | 1_Testes_ARID4B: |
| 1_Testes_ARID4B:               | 132 in gene         | 1 | 32.000 | 1 | 1_Testes_ARID4B: |
| 1_Testes_ARID4B:               | 141 in gene         | 1 | 20.000 | 1 | 1_Testes_ARID4B: |
| 1_Testes_ARID4B:               | 532 in gene         | 1 | 39.000 | 1 | 1_Testes_ARID4B: |
| 1_Testes_ARID4B:               | 247 in gene         | 1 | 24.000 | 1 | 1_Testes_ARID4B: |
| 1_Testes_ARID4B:               | -409 upstream       | 1 | 24.000 | 1 | 1_Testes_ARID4B: |
| 1_Testes_ARID4B:               | 26161 downstream    | 1 | 24.000 | 1 | 1_Testes_ARID4B: |
| 1_Testes_ARID4B:               | 165 in gene         | 1 | 27.000 | 1 | 1_Testes_ARID4B: |
| 1_Testes_ARID4B:               | 33981 in gene       | 1 | 23.000 | 1 | 1_Testes_ARID4B: |
| 1_Testes_ARID4B:               | 261 in gene         | 1 | 20.000 | 1 | 1_Testes_ARID4B: |
| 1_Testes_ARID4B:               | -1361 upstream      | 1 | 18.000 | 1 | 1_Testes_ARID4B: |
| 1_Testes_ARID4B:               | 1259 in gene        | 1 | 18.000 | 1 | 1_Testes_ARID4B: |
| 1_Testes_ARID4B:               | 257 in gene         | 1 | 30.000 | 1 | 1_Testes_ARID4B: |
| 1_Testes_ARID4B:               | 141 in gene         | 1 | 25.000 | 1 | 1_Testes_ARID4B: |
| 1_Testes_ARID4B: 1406, 649     | in gene, in gene    | 1 | 27.000 | 2 | 1_Testes_ARID4B: |
| 1_Testes_ARID4B: -600, 157     | upstream, in gene   | 1 | 27.000 | 2 | 1_Testes_ARID4B: |
| 1_Testes_ARID4B:               | -10238 upstream     | 1 | 27.000 | 1 | 1_Testes_ARID4B: |

|                                     |                        |   |        |   |                  |
|-------------------------------------|------------------------|---|--------|---|------------------|
| 1_Testes_ARID4B:                    | 197 in gene            | 1 | 27.000 | 1 | 1_Testes_ARID4B: |
| 1_Testes_ARID4B:                    | -46 upstream           | 1 | 27.000 | 1 | 1_Testes_ARID4B: |
| 1_Testes_ARID4B:                    | 71 in gene             | 1 | 30.000 | 1 | 1_Testes_ARID4B: |
| 1_Testes_ARID4B:                    | 42853 downstream       | 1 | 58.000 | 1 | 1_Testes_ARID4B: |
| 1_Testes_ARID4B:                    | 167 in gene            | 1 | 58.000 | 1 | 1_Testes_ARID4B: |
| 1_Testes_ARID4B:                    | -233 upstream          | 1 | 58.000 | 1 | 1_Testes_ARID4B: |
| 1_Testes_ARID4B:                    | 178 in gene            | 1 | 24.000 | 1 | 1_Testes_ARID4B: |
| 1_Testes_ARID4B:                    | 35 in gene             | 1 | 30.000 | 1 | 1_Testes_ARID4B: |
| 1_Testes_ARID4B:                    | 307 in gene            | 1 | 23.000 | 1 | 1_Testes_ARID4B: |
| 1_Testes_ARID4B:                    | 192 in gene            | 1 | 21.000 | 1 | 1_Testes_ARID4B: |
| 1_Testes_ARID4B:                    | 607 in gene            | 1 | 22.000 | 1 | 1_Testes_ARID4B: |
| 1_Testes_ARID4B:                    | 289 in gene            | 1 | 34.000 | 1 | 1_Testes_ARID4B: |
| 1_Testes_ARID4B:                    | 176 in gene            | 1 | 21.000 | 1 | 1_Testes_ARID4B: |
| 1_Testes_ARID4B:                    | 276 in gene            | 1 | 23.000 | 1 | 1_Testes_ARID4B: |
| 1_Testes_ARID4B:                    | -109 upstream          | 1 | 21.000 | 1 | 1_Testes_ARID4B: |
| 1_Testes_ARID4B:                    | 757 in gene            | 1 | 20.000 | 1 | 1_Testes_ARID4B: |
| 1_Testes_ARID4B: 238791, 231        | downstream, in gene    | 1 | 19.000 | 2 | 1_Testes_ARID4B: |
| 1_Testes_ARID4B:                    | 653 in gene            | 1 | 17.000 | 1 | 1_Testes_ARID4B: |
| 1_Testes_ARID4B:                    | 189 in gene            | 1 | 28.000 | 1 | 1_Testes_ARID4B: |
| 1_Testes_ARID4B:                    | 243 in gene            | 1 | 31.000 | 1 | 1_Testes_ARID4B: |
| 1_Testes_ARID4B:                    | 216 in gene            | 1 | 18.000 | 1 | 1_Testes_ARID4B: |
| 1_Testes_ARID4B:                    | 426 in gene            | 1 | 27.000 | 1 | 1_Testes_ARID4B: |
| 1_Testes_ARID4B:                    | 11148 in gene          | 1 | 28.000 | 1 | 1_Testes_ARID4B: |
| 1_Testes_ARID4B:                    | -261 upstream          | 1 | 19.000 | 1 | 1_Testes_ARID4B: |
| 1_Testes_ARID4B:                    | 197 in gene            | 1 | 31.000 | 1 | 1_Testes_ARID4B: |
| 1_Testes_ARID4B:                    | -250 upstream          | 1 | 31.000 | 1 | 1_Testes_ARID4B: |
| 1_Testes_ARID4B:                    | 162 in gene            | 1 | 41.000 | 1 | 1_Testes_ARID4B: |
| 1_Testes_ARID4B: 336261, 101, -3963 | downstream, in gene, u | 1 | 42.667 | 3 | 1_Testes_ARID4B: |
| 1_Testes_ARID4B: -3834, 230         | upstream, in gene      | 1 | 43.500 | 2 | 1_Testes_ARID4B: |
| 1_Testes_ARID4B:                    | 418 in gene            | 1 | 20.000 | 1 | 1_Testes_ARID4B: |
| 1_Testes_ARID4B: 42991, 46095       | downstream, downstre   | 1 | 23.500 | 2 | 1_Testes_ARID4B: |
| 1_Testes_ARID4B: 1021, 4125         | in gene, in gene       | 1 | 23.500 | 2 | 1_Testes_ARID4B: |
| 1_Testes_ARID4B:                    | 124 in gene            | 1 | 20.000 | 1 | 1_Testes_ARID4B: |
| 1_Testes_ARID4B:                    | 111 in gene            | 1 | 32.000 | 1 | 1_Testes_ARID4B: |
| 1_Testes_ARID4B:                    | -72 upstream           | 1 | 19.000 | 1 | 1_Testes_ARID4B: |
| 1_Testes_ARID4B:                    | 164 in gene            | 1 | 23.000 | 1 | 1_Testes_ARID4B: |
| 1_Testes_ARID4B:                    | -498 upstream          | 1 | 23.000 | 1 | 1_Testes_ARID4B: |
| 1_Testes_ARID4B:                    | 26727 downstream       | 1 | 23.000 | 1 | 1_Testes_ARID4B: |
| 1_Testes_ARID4B:                    | -159 upstream          | 1 | 20.000 | 1 | 1_Testes_ARID4B: |
| 1_Testes_ARID4B:                    | -2914 upstream         | 1 | 25.000 | 1 | 1_Testes_ARID4B: |
| 1_Testes_ARID4B:                    | 316 in gene            | 1 | 25.000 | 1 | 1_Testes_ARID4B: |
| 1_Testes_ARID4B:                    | 23469 downstream       | 1 | 30.000 | 1 | 1_Testes_ARID4B: |
| 1_Testes_ARID4B:                    | 179 in gene            | 1 | 30.000 | 1 | 1_Testes_ARID4B: |
| 1_Testes_ARID4B:                    | 362 in gene            | 1 | 30.000 | 1 | 1_Testes_ARID4B: |
| 1_Testes_ARID4B:                    | -6901 upstream         | 1 | 30.000 | 1 | 1_Testes_ARID4B: |
| 1_Testes_ARID4B:                    | 413 in gene            | 1 | 31.000 | 1 | 1_Testes_ARID4B: |
| 1_Testes_ARID4B:                    | -1753 upstream         | 1 | 23.000 | 1 | 1_Testes_ARID4B: |

|                                   |                         |   |        |   |                  |
|-----------------------------------|-------------------------|---|--------|---|------------------|
| 1_Testes_ARID4B:                  | 182 in gene             | 1 | 24.000 | 1 | 1_Testes_ARID4B: |
| 1_Testes_ARID4B: 77, 10701        | in gene, downstream     | 1 | 25.500 | 2 | 1_Testes_ARID4B: |
| 1_Testes_ARID4B:                  | 75 in gene              | 1 | 19.000 | 1 | 1_Testes_ARID4B: |
| 1_Testes_ARID4B:                  | 89 in gene              | 1 | 28.000 | 1 | 1_Testes_ARID4B: |
| 1_Testes_ARID4B:                  | 982 in gene             | 1 | 19.000 | 1 | 1_Testes_ARID4B: |
| 1_Testes_ARID4B:                  | 468 in gene             | 1 | 33.000 | 1 | 1_Testes_ARID4B: |
| 1_Testes_ARID4B:                  | -1280 upstream          | 1 | 33.000 | 1 | 1_Testes_ARID4B: |
| 1_Testes_ARID4B:                  | 428 in gene             | 1 | 26.000 | 1 | 1_Testes_ARID4B: |
| 1_Testes_ARID4B:                  | 279 in gene             | 1 | 38.000 | 1 | 1_Testes_ARID4B: |
| 1_Testes_ARID4B:                  | 366 in gene             | 1 | 28.000 | 1 | 1_Testes_ARID4B: |
| 1_Testes_ARID4B:                  | 2665 downstream         | 1 | 28.000 | 1 | 1_Testes_ARID4B: |
| 1_Testes_ARID4B:                  | 136 in gene             | 1 | 28.000 | 1 | 1_Testes_ARID4B: |
| 1_Testes_ARID4B:                  | 223 in gene             | 1 | 28.000 | 1 | 1_Testes_ARID4B: |
| 1_Testes_ARID4B: 70632, -56       | downstream, upstream    | 1 | 26.000 | 2 | 1_Testes_ARID4B: |
| 1_Testes_ARID4B:                  | 574 in gene             | 1 | 20.000 | 1 | 1_Testes_ARID4B: |
| 1_Testes_ARID4B:                  | 143 in gene             | 1 | 28.000 | 1 | 1_Testes_ARID4B: |
| 1_Testes_ARID4B:                  | 479 in gene             | 1 | 27.000 | 1 | 1_Testes_ARID4B: |
| 1_Testes_ARID4B:                  | -502 upstream           | 1 | 27.000 | 1 | 1_Testes_ARID4B: |
| 1_Testes_ARID4B:                  | 43 in gene              | 1 | 39.000 | 1 | 1_Testes_ARID4B: |
| 1_Testes_ARID4B: 550, -410        | in gene, upstream       | 1 | 21.000 | 2 | 1_Testes_ARID4B: |
| 1_Testes_ARID4B:                  | 669 in gene             | 1 | 21.000 | 1 | 1_Testes_ARID4B: |
| 1_Testes_ARID4B:                  | -626 upstream           | 1 | 23.000 | 1 | 1_Testes_ARID4B: |
| 1_Testes_ARID4B:                  | 471 in gene             | 1 | 23.000 | 1 | 1_Testes_ARID4B: |
| 1_Testes_ARID4B:                  | 252 in gene             | 1 | 16.000 | 1 | 1_Testes_ARID4B: |
| 1_Testes_ARID4B:                  | 202 in gene             | 1 | 17.000 | 1 | 1_Testes_ARID4B: |
| 1_Testes_ARID4B:                  | -289 upstream           | 1 | 17.000 | 1 | 1_Testes_ARID4B: |
| 1_Testes_ARID4B:                  | -302 upstream           | 1 | 18.000 | 1 | 1_Testes_ARID4B: |
| 1_Testes_ARID4B:                  | -200 upstream           | 1 | 21.000 | 1 | 1_Testes_ARID4B: |
| 1_Testes_ARID4B:                  | 56 in gene              | 1 | 22.000 | 1 | 1_Testes_ARID4B: |
| 1_Testes_ARID4B:                  | 287 in gene             | 1 | 35.000 | 1 | 1_Testes_ARID4B: |
| 1_Testes_ARID4B: 260, -572        | in gene, upstream       | 1 | 20.500 | 2 | 1_Testes_ARID4B: |
| 1_Testes_ARID4B: 1146, 90         | in gene, in gene        | 1 | 28.000 | 2 | 1_Testes_ARID4B: |
| 1_Testes_ARID4B: -1143, -87       | upstream, upstream      | 1 | 28.000 | 2 | 1_Testes_ARID4B: |
| 1_Testes_ARID4B:                  | -138 upstream           | 1 | 50.000 | 1 | 1_Testes_ARID4B: |
| 1_Testes_ARID4B:                  | -634 upstream           | 1 | 50.000 | 1 | 1_Testes_ARID4B: |
| 1_Testes_ARID4B:                  | 170 in gene             | 1 | 43.000 | 1 | 1_Testes_ARID4B: |
| 1_Testes_ARID4B: 13471, 255       | downstream, in gene     | 1 | 37.000 | 2 | 1_Testes_ARID4B: |
| 1_Testes_ARID4B:                  | 104 in gene             | 1 | 26.000 | 1 | 1_Testes_ARID4B: |
| 1_Testes_ARID4B:                  | -263 upstream           | 1 | 26.000 | 1 | 1_Testes_ARID4B: |
| 1_Testes_ARID4B:                  | 22439 downstream        | 1 | 26.000 | 1 | 1_Testes_ARID4B: |
| 1_Testes_ARID4B:                  | 65 in gene              | 1 | 27.000 | 1 | 1_Testes_ARID4B: |
| 1_Testes_ARID4B:                  | 671 in gene             | 1 | 27.000 | 1 | 1_Testes_ARID4B: |
| 1_Testes_ARID4B:                  | -130 upstream           | 1 | 25.000 | 1 | 1_Testes_ARID4B: |
| 1_Testes_ARID4B:                  | 237 in gene             | 1 | 16.000 | 1 | 1_Testes_ARID4B: |
| 1_Testes_ARID4B:                  | 479 in gene             | 1 | 23.000 | 1 | 1_Testes_ARID4B: |
| 1_Testes_ARID4B:                  | 145 in gene             | 1 | 29.000 | 1 | 1_Testes_ARID4B: |
| 1_Testes_ARID4B: -273, 735, 32191 | upstream, in gene, in g | 1 | 20.667 | 3 | 1_Testes_ARID4B: |

|                                    |                          |   |        |   |                  |
|------------------------------------|--------------------------|---|--------|---|------------------|
| 1_Testes_ARID4B:                   | 286 in gene              | 1 | 22.000 | 1 | 1_Testes_ARID4B: |
| 1_Testes_ARID4B:                   | -321 upstream            | 1 | 22.000 | 1 | 1_Testes_ARID4B: |
| 1_Testes_ARID4B:                   | 478 in gene              | 1 | 27.000 | 1 | 1_Testes_ARID4B: |
| 1_Testes_ARID4B:                   | 699 in gene              | 1 | 27.000 | 1 | 1_Testes_ARID4B: |
| 1_Testes_ARID4B:                   | 6107 in gene             | 1 | 18.000 | 1 | 1_Testes_ARID4B: |
| 1_Testes_ARID4B:                   | 160 in gene              | 1 | 55.000 | 1 | 1_Testes_ARID4B: |
| 1_Testes_ARID4B:                   | 86389 downstream         | 1 | 55.000 | 1 | 1_Testes_ARID4B: |
| 1_Testes_ARID4B:                   | 191 in gene              | 1 | 31.000 | 1 | 1_Testes_ARID4B: |
| 1_Testes_ARID4B:                   | -3234 upstream           | 1 | 18.000 | 1 | 1_Testes_ARID4B: |
| 1_Testes_ARID4B:                   | 107 in gene              | 1 | 24.000 | 1 | 1_Testes_ARID4B: |
| 1_Testes_ARID4B:                   | -178 upstream            | 1 | 24.000 | 1 | 1_Testes_ARID4B: |
| 1_Testes_ARID4B:                   | 25870 downstream         | 1 | 22.000 | 1 | 1_Testes_ARID4B: |
| 1_Testes_ARID4B:                   | 747 in gene              | 1 | 22.000 | 1 | 1_Testes_ARID4B: |
| 1_Testes_ARID4B: 7103, 8063        | downstream, downstre     | 1 | 25.000 | 2 | 1_Testes_ARID4B: |
| 1_Testes_ARID4B: 1125, 165         | in gene, in gene         | 1 | 25.000 | 2 | 1_Testes_ARID4B: |
| 1_Testes_ARID4B: -3020, -2060      | upstream, upstream       | 1 | 25.000 | 2 | 1_Testes_ARID4B: |
| 1_Testes_ARID4B:                   | 54499 downstream         | 1 | 38.000 | 1 | 1_Testes_ARID4B: |
| 1_Testes_ARID4B:                   | 196 in gene              | 1 | 38.000 | 1 | 1_Testes_ARID4B: |
| 1_Testes_ARID4B:                   | 203 in gene              | 1 | 42.000 | 1 | 1_Testes_ARID4B: |
| 1_Testes_ARID4B:                   | 16472 downstream         | 1 | 42.000 | 1 | 1_Testes_ARID4B: |
| 1_Testes_ARID4B:                   | 9520 downstream          | 1 | 31.000 | 1 | 1_Testes_ARID4B: |
| 1_Testes_ARID4B: 84887, 61783, 535 | in gene, in gene, in gen | 1 | 25.000 | 3 | 1_Testes_ARID4B: |
| 1_Testes_ARID4B:                   | -250 upstream            | 1 | 40.000 | 1 | 1_Testes_ARID4B: |
| 1_Testes_ARID4B:                   | 181 in gene              | 1 | 40.000 | 1 | 1_Testes_ARID4B: |
| 1_Testes_ARID4B:                   | 221 in gene              | 1 | 40.000 | 1 | 1_Testes_ARID4B: |
| 1_Testes_ARID4B:                   | -453 upstream            | 1 | 40.000 | 1 | 1_Testes_ARID4B: |
| 1_Testes_ARID4B:                   | 10119 downstream         | 1 | 40.000 | 1 | 1_Testes_ARID4B: |
| 1_Testes_ARID4B:                   | 129 in gene              | 1 | 27.000 | 1 | 1_Testes_ARID4B: |
| 1_Testes_ARID4B:                   | 40047 downstream         | 1 | 18.000 | 1 | 1_Testes_ARID4B: |
| 1_Testes_ARID4B: 261, 99461        | in gene, in gene         | 1 | 21.500 | 2 | 1_Testes_ARID4B: |
| 1_Testes_ARID4B:                   | 245 in gene              | 1 | 24.000 | 1 | 1_Testes_ARID4B: |
| 1_Testes_ARID4B: -774, 298         | upstream, in gene        | 1 | 28.500 | 2 | 1_Testes_ARID4B: |
| 1_Testes_ARID4B:                   | 20819 downstream         | 1 | 24.000 | 1 | 1_Testes_ARID4B: |
| 1_Testes_ARID4B: -67, 31139        | upstream, in gene        | 1 | 22.000 | 2 | 1_Testes_ARID4B: |
| 1_Testes_ARID4B:                   | 95 in gene               | 1 | 37.000 | 1 | 1_Testes_ARID4B: |
| 1_Testes_ARID4B:                   | -6109 upstream           | 1 | 19.000 | 1 | 1_Testes_ARID4B: |
| 1_Testes_ARID4B:                   | 36214 in gene            | 1 | 16.000 | 1 | 1_Testes_ARID4B: |
| 1_Testes_ARID4B: 20241, 97, -1207  | in gene, in gene, upstre | 1 | 23.333 | 3 | 1_Testes_ARID4B: |
| 1_Testes_ARID4B: 4452, 5756        | downstream, downstre     | 1 | 27.000 | 2 | 1_Testes_ARID4B: |
| 1_Testes_ARID4B: -1260, 44         | upstream, in gene        | 1 | 27.000 | 2 | 1_Testes_ARID4B: |
| 1_Testes_ARID4B:                   | 530 in gene              | 1 | 26.000 | 1 | 1_Testes_ARID4B: |
| 1_Testes_ARID4B: 27315, 30195      | downstream, downstre     | 1 | 27.500 | 2 | 1_Testes_ARID4B: |
| 1_Testes_ARID4B: 528, -2352        | in gene, upstream        | 1 | 27.500 | 2 | 1_Testes_ARID4B: |
| 1_Testes_ARID4B: -2787, 93         | upstream, in gene        | 1 | 27.500 | 2 | 1_Testes_ARID4B: |
| 1_Testes_ARID4B: 313, -455         | in gene, upstream        | 1 | 23.000 | 2 | 1_Testes_ARID4B: |
| 1_Testes_ARID4B: -415, 353         | upstream, in gene        | 1 | 23.000 | 2 | 1_Testes_ARID4B: |
| 1_Testes_ARID4B:                   | 59 in gene               | 1 | 28.000 | 1 | 1_Testes_ARID4B: |

|                                     |                         |   |        |   |                  |
|-------------------------------------|-------------------------|---|--------|---|------------------|
| 1_Testes_ARID4B:                    | -338 upstream           | 1 | 28.000 | 1 | 1_Testes_ARID4B: |
| 1_Testes_ARID4B:                    | -667 upstream           | 1 | 51.000 | 1 | 1_Testes_ARID4B: |
| 1_Testes_ARID4B: 84, -1788          | in gene, upstream       | 1 | 31.000 | 2 | 1_Testes_ARID4B: |
| 1_Testes_ARID4B: 1575, -297         | downstream, upstream    | 1 | 31.000 | 2 | 1_Testes_ARID4B: |
| 1_Testes_ARID4B: -1732, 140, 38684  | upstream, in gene, dow  | 1 | 30.667 | 3 | 1_Testes_ARID4B: |
| 1_Testes_ARID4B: -7186, -5314       | upstream, upstream      | 1 | 31.000 | 2 | 1_Testes_ARID4B: |
| 1_Testes_ARID4B: 152, -9352         | in gene, upstream       | 1 | 23.500 | 2 | 1_Testes_ARID4B: |
| 1_Testes_ARID4B: 9644, 140          | downstream, in gene     | 1 | 23.500 | 2 | 1_Testes_ARID4B: |
| 1_Testes_ARID4B: -580, 124          | upstream, in gene       | 1 | 24.500 | 2 | 1_Testes_ARID4B: |
| 1_Testes_ARID4B:                    | 113 in gene             | 1 | 33.000 | 1 | 1_Testes_ARID4B: |
| 1_Testes_ARID4B: 15775, 159         | downstream, in gene     | 1 | 30.500 | 2 | 1_Testes_ARID4B: |
| 1_Testes_ARID4B: 23360, -459        | downstream, upstream    | 1 | 29.000 | 2 | 1_Testes_ARID4B: |
| 1_Testes_ARID4B:                    | 27486 downstream        | 1 | 30.000 | 1 | 1_Testes_ARID4B: |
| 1_Testes_ARID4B: -123, 2213         | upstream, in gene       | 1 | 25.500 | 2 | 1_Testes_ARID4B: |
| 1_Testes_ARID4B: 37167, 34831, 511  | downstream, downstre    | 1 | 30.000 | 3 | 1_Testes_ARID4B: |
| 1_Testes_ARID4B: -7318, 21066       | upstream, downstream    | 1 | 38.500 | 2 | 1_Testes_ARID4B: |
| 1_Testes_ARID4B:                    | 222 in gene             | 1 | 38.000 | 1 | 1_Testes_ARID4B: |
| 1_Testes_ARID4B: 231, 13815         | in gene, downstream     | 1 | 30.000 | 2 | 1_Testes_ARID4B: |
| 1_Testes_ARID4B: 13753, 169, -7399  | downstream, in gene, u  | 1 | 30.000 | 3 | 1_Testes_ARID4B: |
| 1_Testes_ARID4B: -255, 7313         | upstream, downstream    | 1 | 31.500 | 2 | 1_Testes_ARID4B: |
| 1_Testes_ARID4B: 7963, 395          | downstream, in gene     | 1 | 31.500 | 2 | 1_Testes_ARID4B: |
| 1_Testes_ARID4B:                    | 1067 in gene            | 1 | 24.000 | 1 | 1_Testes_ARID4B: |
| 1_Testes_ARID4B:                    | 5886 downstream         | 1 | 24.000 | 1 | 1_Testes_ARID4B: |
| 1_Testes_ARID4B: 146, 47506, 52930  | in gene, in gene, downs | 1 | 28.333 | 3 | 1_Testes_ARID4B: |
| 1_Testes_ARID4B: -5259, 165         | upstream, in gene       | 1 | 24.500 | 2 | 1_Testes_ARID4B: |
| 1_Testes_ARID4B: -5631, 66321       | upstream, downstream    | 1 | 28.500 | 2 | 1_Testes_ARID4B: |
| 1_Testes_ARID4B:                    | 232 in gene             | 1 | 26.000 | 1 | 1_Testes_ARID4B: |
| 1_Testes_ARID4B:                    | -403 upstream           | 1 | 26.000 | 1 | 1_Testes_ARID4B: |
| 1_Testes_ARID4B:                    | 236 in gene             | 1 | 33.000 | 1 | 1_Testes_ARID4B: |
| 1_Testes_ARID4B:                    | 5038 downstream         | 1 | 33.000 | 1 | 1_Testes_ARID4B: |
| 1_Testes_ARID4B: 345, -4279         | in gene, upstream       | 1 | 23.000 | 2 | 1_Testes_ARID4B: |
| 1_Testes_ARID4B: -4481, 143, 121007 | upstream, in gene, in g | 1 | 21.667 | 3 | 1_Testes_ARID4B: |
| 1_Testes_ARID4B:                    | 70 in gene              | 1 | 43.000 | 1 | 1_Testes_ARID4B: |
| 1_Testes_ARID4B: -98, 38430         | upstream, downstream    | 1 | 36.500 | 2 | 1_Testes_ARID4B: |
| 1_Testes_ARID4B: 391, 31623         | in gene, downstream     | 1 | 27.000 | 2 | 1_Testes_ARID4B: |
| 1_Testes_ARID4B:                    | 95 in gene              | 1 | 24.000 | 1 | 1_Testes_ARID4B: |
| 1_Testes_ARID4B:                    | 190 in gene             | 1 | 39.000 | 1 | 1_Testes_ARID4B: |
| 1_Testes_ARID4B:                    | 1168 in gene            | 1 | 26.000 | 1 | 1_Testes_ARID4B: |
| 1_Testes_ARID4B:                    | 66 in gene              | 1 | 28.000 | 1 | 1_Testes_ARID4B: |
| 1_Testes_ARID4B:                    | 129 in gene             | 1 | 17.000 | 1 | 1_Testes_ARID4B: |
| 1_Testes_ARID4B:                    | 35 in gene              | 1 | 17.000 | 1 | 1_Testes_ARID4B: |
| 1_Testes_ARID4B:                    | 247 in gene             | 1 | 24.000 | 1 | 1_Testes_ARID4B: |
| 1_Testes_ARID4B:                    | -7816 upstream          | 1 | 24.000 | 1 | 1_Testes_ARID4B: |
| 1_Testes_ARID4B:                    | 181 in gene             | 1 | 24.000 | 1 | 1_Testes_ARID4B: |
| 1_Testes_ARID4B:                    | -591 upstream           | 1 | 24.000 | 1 | 1_Testes_ARID4B: |
| 1_Testes_ARID4B: 16725, 1429        | in gene, in gene        | 1 | 25.000 | 2 | 1_Testes_ARID4B: |
| 1_Testes_ARID4B:                    | 229 in gene             | 1 | 21.000 | 1 | 1_Testes_ARID4B: |

|                                        |                          |          |                    |
|----------------------------------------|--------------------------|----------|--------------------|
| 1_Testes_ARID4B:                       | 267 in gene              | 1 38.000 | 1 1_Testes_ARID4B: |
| 1_Testes_ARID4B:                       | 421 in gene              | 1 23.000 | 1 1_Testes_ARID4B: |
| 1_Testes_ARID4B:                       | 194 in gene              | 1 32.000 | 1 1_Testes_ARID4B: |
| 1_Testes_ARID4B:                       | 250 in gene              | 1 43.000 | 1 1_Testes_ARID4B: |
| 1_Testes_ARID4B:                       | -485 upstream            | 1 43.000 | 1 1_Testes_ARID4B: |
| 1_Testes_ARID4B:                       | 559 in gene              | 1 17.000 | 1 1_Testes_ARID4B: |
| 1_Testes_ARID4B:                       | 432 in gene              | 1 35.000 | 1 1_Testes_ARID4B: |
| 1_Testes_ARID4B:                       | 25546 downstream         | 1 35.000 | 1 1_Testes_ARID4B: |
| 1_Testes_ARID4B:                       | -450 upstream            | 1 20.000 | 1 1_Testes_ARID4B: |
| 1_Testes_ARID4B:                       | 374 in gene              | 1 20.000 | 1 1_Testes_ARID4B: |
| 1_Testes_ARID4B:                       | 1255 in gene             | 1 20.000 | 1 1_Testes_ARID4B: |
| 1_Testes_ARID4B: 8097, 241, -855       | in gene, in gene, upstre | 1 24.333 | 3 1_Testes_ARID4B: |
| 1_Testes_ARID4B:                       | 3900 in gene             | 1 22.000 | 1 1_Testes_ARID4B: |
| 1_Testes_ARID4B: 194897, -2511         | downstream, upstream     | 1 20.000 | 2 1_Testes_ARID4B: |
| 1_Testes_ARID4B:                       | 665 in gene              | 1 25.000 | 1 1_Testes_ARID4B: |
| 1_Testes_ARID4B:                       | 156 in gene              | 1 26.000 | 1 1_Testes_ARID4B: |
| 1_Testes_ARID4B: 354, 29298            | in gene, in gene         | 1 21.000 | 2 1_Testes_ARID4B: |
| 1_Testes_ARID4B:                       | -557 upstream            | 1 24.000 | 1 1_Testes_ARID4B: |
| 1_Testes_ARID4B: 339, 18067            | in gene, downstream      | 1 27.000 | 2 1_Testes_ARID4B: |
| 1_Testes_ARID4B: 17211, -517           | downstream, upstream     | 1 27.000 | 2 1_Testes_ARID4B: |
| 1_Testes_ARID4B: -28, 19524            | upstream, downstream     | 1 25.000 | 2 1_Testes_ARID4B: |
| 1_Testes_ARID4B:                       | 104 in gene              | 1 20.000 | 1 1_Testes_ARID4B: |
| 1_Testes_ARID4B:                       | 84 in gene               | 1 22.000 | 1 1_Testes_ARID4B: |
| 1_Testes_ARID4B:                       | 705 in gene              | 1 28.000 | 1 1_Testes_ARID4B: |
| 1_Testes_ARID4B:                       | 562 in gene              | 1 30.000 | 1 1_Testes_ARID4B: |
| 1_Testes_ARID4B: 42491, 299            | downstream, in gene      | 1 36.500 | 2 1_Testes_ARID4B: |
| 1_Testes_ARID4B:                       | 52 in gene               | 1 27.000 | 1 1_Testes_ARID4B: |
| 1_Testes_ARID4B: 88948, 1364           | in gene, in gene         | 1 19.000 | 2 1_Testes_ARID4B: |
| 1_Testes_ARID4B:                       | -1626 upstream           | 1 17.000 | 1 1_Testes_ARID4B: |
| 1_Testes_ARID4B:                       | -2584 upstream           | 1 22.000 | 1 1_Testes_ARID4B: |
| 1_Testes_ARID4B:                       | 382 in gene              | 1 22.000 | 1 1_Testes_ARID4B: |
| 1_Testes_ARID4B:                       | 269 in gene              | 1 30.000 | 1 1_Testes_ARID4B: |
| 1_Testes_ARID4B: -6331, -9163, -9611   | upstream, upstream, u    | 1 27.000 | 3 1_Testes_ARID4B: |
| 1_Testes_ARID4B: 708, 3540, 3988, 5140 | in gene, downstream, c   | 1 25.500 | 4 1_Testes_ARID4B: |
| 1_Testes_ARID4B: -3233, -401, 47, 1199 | upstream, upstream, in   | 1 25.500 | 4 1_Testes_ARID4B: |
| 1_Testes_ARID4B:                       | 226 in gene              | 1 28.000 | 1 1_Testes_ARID4B: |
| 1_Testes_ARID4B:                       | 1024 in gene             | 1 23.000 | 1 1_Testes_ARID4B: |
| 1_Testes_ARID4B:                       | 100 in gene              | 1 37.000 | 1 1_Testes_ARID4B: |
| 1_Testes_ARID4B:                       | 48951 downstream         | 1 37.000 | 1 1_Testes_ARID4B: |
| 1_Testes_ARID4B:                       | 67 in gene               | 1 33.000 | 1 1_Testes_ARID4B: |
| 1_Testes_ARID4B:                       | 228 in gene              | 1 24.000 | 1 1_Testes_ARID4B: |
| 1_Testes_ARID4B:                       | -542 upstream            | 1 24.000 | 1 1_Testes_ARID4B: |
| 1_Testes_ARID4B:                       | 53 in gene               | 1 29.000 | 1 1_Testes_ARID4B: |
| 1_Testes_ARID4B:                       | 68 in gene               | 1 23.000 | 1 1_Testes_ARID4B: |
| 1_Testes_ARID4B: 3934, 8910            | downstream, downstre     | 1 25.500 | 2 1_Testes_ARID4B: |
| 1_Testes_ARID4B: 164, 5140             | in gene, downstream      | 1 25.500 | 2 1_Testes_ARID4B: |
| 1_Testes_ARID4B: 100146, 95170         | downstream, in gene      | 1 25.500 | 2 1_Testes_ARID4B: |

|                                        |       |                          |   |        |   |                  |
|----------------------------------------|-------|--------------------------|---|--------|---|------------------|
| 1_Testes_ARID4B:                       | 78339 | downstream               | 1 | 22.000 | 1 | 1_Testes_ARID4B: |
| 1_Testes_ARID4B: 1956, 868             |       | in gene, in gene         | 1 | 21.500 | 2 | 1_Testes_ARID4B: |
| 1_Testes_ARID4B:                       | 602   | in gene                  | 1 | 27.000 | 1 | 1_Testes_ARID4B: |
| 1_Testes_ARID4B: 623, -9921            |       | in gene, upstream        | 1 | 39.000 | 2 | 1_Testes_ARID4B: |
| 1_Testes_ARID4B: -10023, 521, 12153    |       | upstream, in gene, dow   | 1 | 34.667 | 3 | 1_Testes_ARID4B: |
| 1_Testes_ARID4B:                       | 80    | in gene                  | 1 | 26.000 | 1 | 1_Testes_ARID4B: |
| 1_Testes_ARID4B:                       | 30499 | downstream               | 1 | 24.000 | 1 | 1_Testes_ARID4B: |
| 1_Testes_ARID4B:                       | 181   | in gene                  | 1 | 24.000 | 1 | 1_Testes_ARID4B: |
| 1_Testes_ARID4B:                       | 45    | in gene                  | 1 | 31.000 | 1 | 1_Testes_ARID4B: |
| 1_Testes_ARID4B:                       | -529  | upstream                 | 1 | 31.000 | 1 | 1_Testes_ARID4B: |
| 1_Testes_ARID4B: 123043, 121070, 98254 |       | in gene, in gene, in gen | 1 | 24.000 | 5 | 1_Testes_ARID4B: |
| 1_Testes_ARID4B:                       | 198   | in gene                  | 1 | 32.000 | 1 | 1_Testes_ARID4B: |
| 1_Testes_ARID4B:                       | 497   | in gene                  | 1 | 39.000 | 1 | 1_Testes_ARID4B: |
| 1_Testes_ARID4B:                       | -370  | upstream                 | 1 | 18.000 | 1 | 1_Testes_ARID4B: |
| 1_Testes_ARID4B:                       | 208   | in gene                  | 1 | 30.000 | 1 | 1_Testes_ARID4B: |
| 1_Testes_ARID4B:                       | -412  | upstream                 | 1 | 43.000 | 1 | 1_Testes_ARID4B: |
| 1_Testes_ARID4B:                       | 113   | in gene                  | 1 | 29.000 | 1 | 1_Testes_ARID4B: |
| 1_Testes_ARID4B:                       | 490   | in gene                  | 1 | 18.000 | 1 | 1_Testes_ARID4B: |
| 1_Testes_ARID4B:                       | -7089 | upstream                 | 1 | 25.000 | 1 | 1_Testes_ARID4B: |
| 1_Testes_ARID4B:                       | 72    | in gene                  | 1 | 25.000 | 1 | 1_Testes_ARID4B: |
| 1_Testes_ARID4B:                       | -9475 | upstream                 | 1 | 25.000 | 1 | 1_Testes_ARID4B: |
| 1_Testes_ARID4B:                       | -299  | upstream                 | 1 | 32.000 | 1 | 1_Testes_ARID4B: |
| 1_Testes_ARID4B:                       | 167   | in gene                  | 1 | 32.000 | 1 | 1_Testes_ARID4B: |
| 1_Testes_ARID4B:                       | -7009 | upstream                 | 1 | 32.000 | 1 | 1_Testes_ARID4B: |
| 1_Testes_ARID4B:                       | -7989 | upstream                 | 1 | 22.000 | 1 | 1_Testes_ARID4B: |
| 1_Testes_ARID4B:                       | 398   | in gene                  | 1 | 22.000 | 1 | 1_Testes_ARID4B: |
| 1_Testes_ARID4B:                       | -8651 | upstream                 | 1 | 22.000 | 1 | 1_Testes_ARID4B: |
| 1_Testes_ARID4B:                       | 50805 | downstream               | 1 | 28.000 | 1 | 1_Testes_ARID4B: |
| 1_Testes_ARID4B:                       | 2880  | in gene                  | 1 | 28.000 | 1 | 1_Testes_ARID4B: |
| 1_Testes_ARID4B:                       | 38    | in gene                  | 1 | 28.000 | 1 | 1_Testes_ARID4B: |
| 1_Testes_ARID4B:                       | -195  | upstream                 | 1 | 28.000 | 1 | 1_Testes_ARID4B: |
| 1_Testes_ARID4B: 1003895, 583, -729    |       | in gene, in gene, upstre | 1 | 21.000 | 3 | 1_Testes_ARID4B: |
| 1_Testes_ARID4B:                       | -36   | upstream                 | 1 | 19.000 | 1 | 1_Testes_ARID4B: |
| 1_Testes_ARID4B:                       | 143   | in gene                  | 1 | 30.000 | 1 | 1_Testes_ARID4B: |
| 1_Testes_ARID4B:                       | -7414 | upstream                 | 1 | 30.000 | 1 | 1_Testes_ARID4B: |
| 1_Testes_ARID4B:                       | 495   | in gene                  | 1 | 20.000 | 1 | 1_Testes_ARID4B: |
| 1_Testes_ARID4B:                       | 338   | in gene                  | 1 | 26.000 | 1 | 1_Testes_ARID4B: |
| 1_Testes_ARID4B:                       | 8075  | downstream               | 1 | 26.000 | 1 | 1_Testes_ARID4B: |
| 1_Testes_ARID4B:                       | 224   | in gene                  | 1 | 33.000 | 1 | 1_Testes_ARID4B: |
| 1_Testes_ARID4B:                       | 334   | in gene                  | 1 | 24.000 | 1 | 1_Testes_ARID4B: |
| 1_Testes_ARID4B:                       | 11766 | downstream               | 1 | 24.000 | 1 | 1_Testes_ARID4B: |
| 1_Testes_ARID4B:                       | 18380 | in gene                  | 1 | 19.000 | 1 | 1_Testes_ARID4B: |
| 1_Testes_ARID4B:                       | 218   | in gene                  | 1 | 33.000 | 1 | 1_Testes_ARID4B: |
| 1_Testes_ARID4B:                       | 242   | in gene                  | 1 | 33.000 | 1 | 1_Testes_ARID4B: |
| 1_Testes_ARID4B:                       | 13818 | downstream               | 1 | 33.000 | 1 | 1_Testes_ARID4B: |
| 1_Testes_ARID4B:                       | 277   | in gene                  | 1 | 23.000 | 1 | 1_Testes_ARID4B: |
| 1_Testes_ARID4B: 209, 18993            |       | in gene, downstream      | 1 | 24.000 | 2 | 1_Testes_ARID4B: |

|                                         |                         |   |        |   |                  |
|-----------------------------------------|-------------------------|---|--------|---|------------------|
| 1_Testes_ARID4B: 332, 19372             | in gene, downstream     | 1 | 31.000 | 2 | 1_Testes_ARID4B: |
| 1_Testes_ARID4B: 421, 63461             | in gene, downstream     | 1 | 39.500 | 2 | 1_Testes_ARID4B: |
| 1_Testes_ARID4B:                        | 263 in gene             | 1 | 33.000 | 1 | 1_Testes_ARID4B: |
| 1_Testes_ARID4B:                        | 594 in gene             | 1 | 17.000 | 1 | 1_Testes_ARID4B: |
| 1_Testes_ARID4B:                        | 55778 in gene           | 1 | 18.000 | 1 | 1_Testes_ARID4B: |
| 1_Testes_ARID4B:                        | 54930 downstream        | 1 | 29.000 | 1 | 1_Testes_ARID4B: |
| 1_Testes_ARID4B:                        | 28 in gene              | 1 | 29.000 | 1 | 1_Testes_ARID4B: |
| 1_Testes_ARID4B: 34241, -303            | downstream, upstream    | 1 | 25.500 | 2 | 1_Testes_ARID4B: |
| 1_Testes_ARID4B:                        | 39 in gene              | 1 | 22.000 | 1 | 1_Testes_ARID4B: |
| 1_Testes_ARID4B:                        | 156 in gene             | 1 | 23.000 | 1 | 1_Testes_ARID4B: |
| 1_Testes_ARID4B: 12935, 887             | in gene, in gene        | 1 | 24.500 | 2 | 1_Testes_ARID4B: |
| 1_Testes_ARID4B: 323415, 487            | downstream, in gene     | 1 | 25.000 | 2 | 1_Testes_ARID4B: |
| 1_Testes_ARID4B:                        | 211 in gene             | 1 | 17.000 | 1 | 1_Testes_ARID4B: |
| 1_Testes_ARID4B:                        | 10 in gene              | 1 | 25.000 | 1 | 1_Testes_ARID4B: |
| 1_Testes_ARID4B:                        | 554 in gene             | 1 | 26.000 | 1 | 1_Testes_ARID4B: |
| 1_Testes_ARID4B:                        | 309 in gene             | 1 | 26.000 | 1 | 1_Testes_ARID4B: |
| 1_Testes_ARID4B:                        | -4105 upstream          | 1 | 26.000 | 1 | 1_Testes_ARID4B: |
| 1_Testes_ARID4B:                        | 2217 in gene            | 1 | 21.000 | 1 | 1_Testes_ARID4B: |
| 1_Testes_ARID4B:                        | 13548 downstream        | 1 | 21.000 | 1 | 1_Testes_ARID4B: |
| 1_Testes_ARID4B:                        | 5835 in gene            | 1 | 23.000 | 1 | 1_Testes_ARID4B: |
| 1_Testes_ARID4B:                        | -557 upstream           | 1 | 23.000 | 1 | 1_Testes_ARID4B: |
| 1_Testes_ARID4B: 13562, -6310, -7254    | downstream, upstream    | 1 | 21.000 | 3 | 1_Testes_ARID4B: |
| 1_Testes_ARID4B: 257, -687              | in gene, upstream       | 1 | 20.000 | 2 | 1_Testes_ARID4B: |
| 1_Testes_ARID4B: 19598, 18654, -242     | downstream, in gene, u  | 1 | 20.667 | 3 | 1_Testes_ARID4B: |
| 1_Testes_ARID4B:                        | 35 in gene              | 1 | 25.000 | 1 | 1_Testes_ARID4B: |
| 1_Testes_ARID4B:                        | -8515 upstream          | 1 | 22.000 | 1 | 1_Testes_ARID4B: |
| 1_Testes_ARID4B: -7936, 6128, 10613, 12 | upstream, in gene, dow  | 1 | 23.250 | 4 | 1_Testes_ARID4B: |
| 1_Testes_ARID4B: 8221, 3736, 1389       | downstream, in gene, in | 1 | 23.667 | 3 | 1_Testes_ARID4B: |
| 1_Testes_ARID4B:                        | -4266 upstream          | 1 | 30.000 | 1 | 1_Testes_ARID4B: |
| 1_Testes_ARID4B:                        | 221 in gene             | 1 | 30.000 | 1 | 1_Testes_ARID4B: |
| 1_Testes_ARID4B:                        | 221 in gene             | 1 | 30.000 | 1 | 1_Testes_ARID4B: |
| 1_Testes_ARID4B: -1410, -7362           | upstream, upstream      | 1 | 23.500 | 2 | 1_Testes_ARID4B: |
| 1_Testes_ARID4B: -4561, 1391            | upstream, in gene       | 1 | 23.500 | 2 | 1_Testes_ARID4B: |
| 1_Testes_ARID4B: 666, 6330              | in gene, downstream     | 1 | 25.500 | 2 | 1_Testes_ARID4B: |
| 1_Testes_ARID4B: 7117, 1453             | downstream, in gene     | 1 | 25.500 | 2 | 1_Testes_ARID4B: |
| 1_Testes_ARID4B: -8218, -2554           | upstream, upstream      | 1 | 25.500 | 2 | 1_Testes_ARID4B: |
| 1_Testes_ARID4B:                        | 148 in gene             | 1 | 27.000 | 1 | 1_Testes_ARID4B: |
| 1_Testes_ARID4B:                        | 10050 downstream        | 1 | 36.000 | 1 | 1_Testes_ARID4B: |
| 1_Testes_ARID4B:                        | 710 in gene             | 1 | 36.000 | 1 | 1_Testes_ARID4B: |
| 1_Testes_ARID4B:                        | -5748 upstream          | 1 | 36.000 | 1 | 1_Testes_ARID4B: |
| 1_Testes_ARID4B:                        | -5542 upstream          | 1 | 36.000 | 1 | 1_Testes_ARID4B: |
| 1_Testes_ARID4B:                        | -5334 upstream          | 1 | 36.000 | 1 | 1_Testes_ARID4B: |
| 1_Testes_ARID4B:                        | -869 upstream           | 1 | 36.000 | 1 | 1_Testes_ARID4B: |
| 1_Testes_ARID4B:                        | 16034 downstream        | 1 | 36.000 | 1 | 1_Testes_ARID4B: |
| 1_Testes_ARID4B:                        | 8230 downstream         | 1 | 22.000 | 1 | 1_Testes_ARID4B: |
| 1_Testes_ARID4B:                        | 340 in gene             | 1 | 22.000 | 1 | 1_Testes_ARID4B: |
| 1_Testes_ARID4B:                        | -333 upstream           | 1 | 22.000 | 1 | 1_Testes_ARID4B: |



|                  |                        |                          |   |        |   |                  |
|------------------|------------------------|--------------------------|---|--------|---|------------------|
| 1_Testes_ARID4B: | 9042                   | downstream               | 1 | 22.000 | 1 | 1_Testes_ARID4B: |
| 1_Testes_ARID4B: | 16225                  | downstream               | 1 | 22.000 | 1 | 1_Testes_ARID4B: |
| 1_Testes_ARID4B: | 60                     | in gene                  | 1 | 27.000 | 1 | 1_Testes_ARID4B: |
| 1_Testes_ARID4B: | -521                   | upstream                 | 1 | 32.000 | 1 | 1_Testes_ARID4B: |
| 1_Testes_ARID4B: | 1753, 169, -951        | in gene, in gene, upstre | 1 | 26.667 | 3 | 1_Testes_ARID4B: |
| 1_Testes_ARID4B: | 81                     | in gene                  | 1 | 31.000 | 1 | 1_Testes_ARID4B: |
| 1_Testes_ARID4B: | 227                    | in gene                  | 1 | 43.000 | 1 | 1_Testes_ARID4B: |
| 1_Testes_ARID4B: | 4087                   | in gene                  | 1 | 15.000 | 1 | 1_Testes_ARID4B: |
| 1_Testes_ARID4B: | 103830, 88438, 79702   | downstream, in gene, in  | 1 | 25.000 | 3 | 1_Testes_ARID4B: |
| 1_Testes_ARID4B: | -2351                  | upstream                 | 1 | 38.000 | 1 | 1_Testes_ARID4B: |
| 1_Testes_ARID4B: | -5601, 3135            | upstream, downstream     | 1 | 30.000 | 2 | 1_Testes_ARID4B: |
| 1_Testes_ARID4B: | -8571, 165             | upstream, in gene        | 1 | 30.000 | 2 | 1_Testes_ARID4B: |
| 1_Testes_ARID4B: | 331                    | in gene                  | 1 | 23.000 | 1 | 1_Testes_ARID4B: |
| 1_Testes_ARID4B: | 23529                  | downstream               | 1 | 21.000 | 1 | 1_Testes_ARID4B: |
| 1_Testes_ARID4B: | 3382                   | in gene                  | 1 | 21.000 | 1 | 1_Testes_ARID4B: |
| 1_Testes_ARID4B: | 190                    | in gene                  | 1 | 25.000 | 1 | 1_Testes_ARID4B: |
| 1_Testes_ARID4B: | 112, 21456             | in gene, downstream      | 1 | 24.500 | 2 | 1_Testes_ARID4B: |
| 1_Testes_ARID4B: | 1291                   | in gene                  | 1 | 20.000 | 1 | 1_Testes_ARID4B: |
| 1_Testes_ARID4B: | 347                    | in gene                  | 1 | 23.000 | 1 | 1_Testes_ARID4B: |
| 1_Testes_ARID4B: | 137                    | in gene                  | 1 | 18.000 | 1 | 1_Testes_ARID4B: |
| 1_Testes_ARID4B: | 80                     | in gene                  | 1 | 20.000 | 1 | 1_Testes_ARID4B: |
| 1_Testes_ARID4B: | 10426                  | downstream               | 1 | 20.000 | 1 | 1_Testes_ARID4B: |
| 1_Testes_ARID4B: | -10450                 | upstream                 | 1 | 20.000 | 1 | 1_Testes_ARID4B: |
| 1_Testes_ARID4B: | 119                    | in gene                  | 1 | 31.000 | 1 | 1_Testes_ARID4B: |
| 1_Testes_ARID4B: | 147, 14819             | in gene, downstream      | 1 | 27.500 | 2 | 1_Testes_ARID4B: |
| 1_Testes_ARID4B: | -8207, 6465            | upstream, downstream     | 1 | 27.500 | 2 | 1_Testes_ARID4B: |
| 1_Testes_ARID4B: | 26871, 279             | in gene, in gene         | 1 | 26.500 | 2 | 1_Testes_ARID4B: |
| 1_Testes_ARID4B: | 250                    | in gene                  | 1 | 36.000 | 1 | 1_Testes_ARID4B: |
| 1_Testes_ARID4B: | -2895                  | upstream                 | 1 | 36.000 | 1 | 1_Testes_ARID4B: |
| 1_Testes_ARID4B: | 383                    | in gene                  | 1 | 27.000 | 1 | 1_Testes_ARID4B: |
| 1_Testes_ARID4B: | 359, 62663             | in gene, downstream      | 1 | 39.000 | 2 | 1_Testes_ARID4B: |
| 1_Testes_ARID4B: | 229                    | in gene                  | 1 | 40.000 | 1 | 1_Testes_ARID4B: |
| 1_Testes_ARID4B: | 229                    | in gene                  | 1 | 34.000 | 1 | 1_Testes_ARID4B: |
| 1_Testes_ARID4B: | 2251, 75, -3045, -4394 | in gene, in gene, upstre | 1 | 30.500 | 4 | 1_Testes_ARID4B: |
| 1_Testes_ARID4B: | -26, -11194            | upstream, upstream       | 1 | 32.500 | 2 | 1_Testes_ARID4B: |
| 1_Testes_ARID4B: | 11460, 292             | downstream, in gene      | 1 | 32.500 | 2 | 1_Testes_ARID4B: |
| 1_Testes_ARID4B: | 445                    | in gene                  | 1 | 55.000 | 1 | 1_Testes_ARID4B: |
| 1_Testes_ARID4B: | 18264                  | downstream               | 1 | 27.000 | 1 | 1_Testes_ARID4B: |
| 1_Testes_ARID4B: | 16550                  | in gene                  | 1 | 27.000 | 1 | 1_Testes_ARID4B: |
| 1_Testes_ARID4B: | 4468                   | in gene                  | 1 | 20.000 | 1 | 1_Testes_ARID4B: |
| 1_Testes_ARID4B: | 352                    | in gene                  | 1 | 35.000 | 1 | 1_Testes_ARID4B: |
| 1_Testes_ARID4B: | 14230, 166             | downstream, in gene      | 1 | 32.500 | 2 | 1_Testes_ARID4B: |
| 1_Testes_ARID4B: | -236                   | upstream                 | 1 | 30.000 | 1 | 1_Testes_ARID4B: |
| 1_Testes_ARID4B: | 84                     | in gene                  | 1 | 33.000 | 1 | 1_Testes_ARID4B: |
| 1_Testes_ARID4B: | 345                    | in gene                  | 1 | 30.000 | 1 | 1_Testes_ARID4B: |
| 1_Testes_ARID4B: | 97                     | in gene                  | 1 | 32.000 | 1 | 1_Testes_ARID4B: |
| 1_Testes_ARID4B: | 133                    | in gene                  | 1 | 20.000 | 1 | 1_Testes_ARID4B: |

|                              |                      |   |        |   |                  |
|------------------------------|----------------------|---|--------|---|------------------|
| 1_Testes_ARID4B:             | 35889 downstream     | 1 | 20.000 | 1 | 1_Testes_ARID4B: |
| 1_Testes_ARID4B:             | -20 upstream         | 1 | 28.000 | 1 | 1_Testes_ARID4B: |
| 1_Testes_ARID4B:             | 11147 in gene        | 1 | 21.000 | 1 | 1_Testes_ARID4B: |
| 1_Testes_ARID4B:             | 102528 downstream    | 1 | 21.000 | 1 | 1_Testes_ARID4B: |
| 1_Testes_ARID4B:             | -124 upstream        | 1 | 20.000 | 1 | 1_Testes_ARID4B: |
| 1_Testes_ARID4B:             | 273 in gene          | 1 | 20.000 | 1 | 1_Testes_ARID4B: |
| 1_Testes_ARID4B:             | -7094 upstream       | 1 | 28.000 | 1 | 1_Testes_ARID4B: |
| 1_Testes_ARID4B:             | -120 upstream        | 1 | 28.000 | 1 | 1_Testes_ARID4B: |
| 1_Testes_ARID4B:             | 88550 in gene        | 1 | 22.000 | 1 | 1_Testes_ARID4B: |
| 1_Testes_ARID4B: -61, 31011  | upstream, downstream | 1 | 24.500 | 2 | 1_Testes_ARID4B: |
| 1_Testes_ARID4B:             | 624 in gene          | 1 | 30.000 | 1 | 1_Testes_ARID4B: |
| 1_Testes_ARID4B:             | 217 in gene          | 1 | 36.000 | 1 | 1_Testes_ARID4B: |
| 1_Testes_ARID4B:             | -525 upstream        | 1 | 36.000 | 1 | 1_Testes_ARID4B: |
| 1_Testes_ARID4B: 27232, -176 | downstream, upstream | 1 | 27.000 | 2 | 1_Testes_ARID4B: |
| 1_Testes_ARID4B:             | 56 in gene           | 1 | 18.000 | 1 | 1_Testes_ARID4B: |
| 1_Testes_ARID4B:             | 27441 downstream     | 1 | 27.000 | 1 | 1_Testes_ARID4B: |
| 1_Testes_ARID4B:             | 285 in gene          | 1 | 27.000 | 1 | 1_Testes_ARID4B: |
| 1_Testes_ARID4B:             | -2639 upstream       | 1 | 32.000 | 1 | 1_Testes_ARID4B: |
| 1_Testes_ARID4B:             | -9615 upstream       | 1 | 25.000 | 1 | 1_Testes_ARID4B: |
| 1_Testes_ARID4B:             | -603 upstream        | 1 | 25.000 | 1 | 1_Testes_ARID4B: |
| 1_Testes_ARID4B:             | 230 in gene          | 1 | 38.000 | 1 | 1_Testes_ARID4B: |
| 1_Testes_ARID4B:             | 14991 downstream     | 1 | 24.000 | 1 | 1_Testes_ARID4B: |
| 1_Testes_ARID4B:             | 149 in gene          | 1 | 24.000 | 1 | 1_Testes_ARID4B: |
| 1_Testes_ARID4B:             | -388 upstream        | 1 | 26.000 | 1 | 1_Testes_ARID4B: |
| 1_Testes_ARID4B:             | -581 upstream        | 1 | 26.000 | 1 | 1_Testes_ARID4B: |
| 1_Testes_ARID4B:             | 11684 downstream     | 1 | 26.000 | 1 | 1_Testes_ARID4B: |
| 1_Testes_ARID4B:             | -276 upstream        | 1 | 26.000 | 1 | 1_Testes_ARID4B: |
| 1_Testes_ARID4B:             | 500 in gene          | 1 | 16.000 | 1 | 1_Testes_ARID4B: |
| 1_Testes_ARID4B:             | 204 in gene          | 1 | 29.000 | 1 | 1_Testes_ARID4B: |
| 1_Testes_ARID4B:             | 384 in gene          | 1 | 41.000 | 1 | 1_Testes_ARID4B: |
| 1_Testes_ARID4B:             | -489 upstream        | 1 | 31.000 | 1 | 1_Testes_ARID4B: |
| 1_Testes_ARID4B:             | -115 upstream        | 1 | 25.000 | 1 | 1_Testes_ARID4B: |
| 1_Testes_ARID4B:             | -7874 upstream       | 1 | 22.000 | 1 | 1_Testes_ARID4B: |
| 1_Testes_ARID4B:             | 219 in gene          | 1 | 29.000 | 1 | 1_Testes_ARID4B: |
| 1_Testes_ARID4B:             | -5506 upstream       | 1 | 29.000 | 1 | 1_Testes_ARID4B: |
| 1_Testes_ARID4B:             | -9751 upstream       | 1 | 20.000 | 1 | 1_Testes_ARID4B: |
| 1_Testes_ARID4B:             | 431 in gene          | 1 | 20.000 | 1 | 1_Testes_ARID4B: |
| 1_Testes_ARID4B:             | 189 in gene          | 1 | 20.000 | 1 | 1_Testes_ARID4B: |
| 1_Testes_ARID4B: 460, -8788  | in gene, upstream    | 1 | 24.000 | 2 | 1_Testes_ARID4B: |
| 1_Testes_ARID4B: -8675, 573  | upstream, in gene    | 1 | 24.000 | 2 | 1_Testes_ARID4B: |
| 1_Testes_ARID4B:             | 449 in gene          | 1 | 26.000 | 1 | 1_Testes_ARID4B: |
| 1_Testes_ARID4B:             | 65 in gene           | 1 | 19.000 | 1 | 1_Testes_ARID4B: |
| 1_Testes_ARID4B:             | -498 upstream        | 1 | 26.000 | 1 | 1_Testes_ARID4B: |
| 1_Testes_ARID4B:             | 392 in gene          | 1 | 26.000 | 1 | 1_Testes_ARID4B: |
| 1_Testes_ARID4B:             | 405 in gene          | 1 | 24.000 | 1 | 1_Testes_ARID4B: |
| 1_Testes_ARID4B:             | -5767 upstream       | 1 | 24.000 | 1 | 1_Testes_ARID4B: |
| 1_Testes_ARID4B:             | 404 in gene          | 1 | 19.000 | 1 | 1_Testes_ARID4B: |

|                                 |                     |   |        |   |                  |
|---------------------------------|---------------------|---|--------|---|------------------|
| 1_Testes_ARID4B:                | 181 in gene         | 1 | 34.000 | 1 | 1_Testes_ARID4B: |
| 1_Testes_ARID4B:                | 359 in gene         | 1 | 18.000 | 1 | 1_Testes_ARID4B: |
| 1_Testes_ARID4B:                | 161 in gene         | 1 | 18.000 | 1 | 1_Testes_ARID4B: |
| 1_Testes_ARID4B:                | 159 in gene         | 1 | 36.000 | 1 | 1_Testes_ARID4B: |
| 1_Testes_ARID4B:                | 872 in gene         | 1 | 18.000 | 1 | 1_Testes_ARID4B: |
| 1_Testes_ARID4B:                | 379 in gene         | 1 | 21.000 | 1 | 1_Testes_ARID4B: |
| 1_Testes_ARID4B:                | 251 in gene         | 1 | 22.000 | 1 | 1_Testes_ARID4B: |
| 1_Testes_ARID4B:                | -268 upstream       | 1 | 22.000 | 1 | 1_Testes_ARID4B: |
| 1_Testes_ARID4B:                | 115 in gene         | 1 | 22.000 | 1 | 1_Testes_ARID4B: |
| 1_Testes_ARID4B:                | 105 in gene         | 1 | 21.000 | 1 | 1_Testes_ARID4B: |
| 1_Testes_ARID4B:                | -637 upstream       | 1 | 19.000 | 1 | 1_Testes_ARID4B: |
| 1_Testes_ARID4B:                | 99 in gene          | 1 | 25.000 | 1 | 1_Testes_ARID4B: |
| 1_Testes_ARID4B:                | 285 in gene         | 1 | 18.000 | 1 | 1_Testes_ARID4B: |
| 1_Testes_ARID4B:                | 1396 in gene        | 1 | 18.000 | 1 | 1_Testes_ARID4B: |
| 1_Testes_ARID4B:                | -239 upstream       | 1 | 25.000 | 1 | 1_Testes_ARID4B: |
| 1_Testes_ARID4B: 352084, 353364 | in gene, in gene    | 1 | 22.000 | 2 | 1_Testes_ARID4B: |
| 1_Testes_ARID4B: -685, -1965    | upstream, upstream  | 1 | 22.000 | 2 | 1_Testes_ARID4B: |
| 1_Testes_ARID4B:                | -5852 upstream      | 1 | 20.000 | 1 | 1_Testes_ARID4B: |
| 1_Testes_ARID4B:                | 9008 in gene        | 1 | 20.000 | 1 | 1_Testes_ARID4B: |
| 1_Testes_ARID4B:                | 34690 downstream    | 1 | 34.000 | 1 | 1_Testes_ARID4B: |
| 1_Testes_ARID4B:                | 463 in gene         | 1 | 34.000 | 1 | 1_Testes_ARID4B: |
| 1_Testes_ARID4B:                | 383 in gene         | 1 | 24.000 | 1 | 1_Testes_ARID4B: |
| 1_Testes_ARID4B: 679, 33095     | in gene, downstream | 1 | 24.500 | 2 | 1_Testes_ARID4B: |
| 1_Testes_ARID4B:                | 149 in gene         | 1 | 20.000 | 1 | 1_Testes_ARID4B: |
| 1_Testes_ARID4B:                | 700 in gene         | 1 | 18.000 | 1 | 1_Testes_ARID4B: |
| 1_Testes_ARID4B:                | 99643 downstream    | 1 | 18.000 | 1 | 1_Testes_ARID4B: |
| 1_Testes_ARID4B:                | 4638 in gene        | 1 | 27.000 | 1 | 1_Testes_ARID4B: |
| 1_Testes_ARID4B:                | -3155 upstream      | 1 | 27.000 | 1 | 1_Testes_ARID4B: |
| 1_Testes_ARID4B:                | 12494 downstream    | 1 | 27.000 | 1 | 1_Testes_ARID4B: |
| 1_Testes_ARID4B:                | 654 in gene         | 1 | 22.000 | 1 | 1_Testes_ARID4B: |
| 1_Testes_ARID4B:                | -187 upstream       | 1 | 23.000 | 1 | 1_Testes_ARID4B: |
| 1_Testes_ARID4B:                | 132 in gene         | 1 | 23.000 | 1 | 1_Testes_ARID4B: |
| 1_Testes_ARID4B:                | 289 in gene         | 1 | 22.000 | 1 | 1_Testes_ARID4B: |
| 1_Testes_ARID4B:                | 126 in gene         | 1 | 33.000 | 1 | 1_Testes_ARID4B: |
| 1_Testes_ARID4B:                | 241 in gene         | 1 | 30.000 | 1 | 1_Testes_ARID4B: |
| 1_Testes_ARID4B:                | 71036 downstream    | 1 | 23.000 | 1 | 1_Testes_ARID4B: |
| 1_Testes_ARID4B:                | 48 in gene          | 1 | 23.000 | 1 | 1_Testes_ARID4B: |
| 1_Testes_ARID4B:                | 464 in gene         | 1 | 29.000 | 1 | 1_Testes_ARID4B: |
| 1_Testes_ARID4B:                | 272 in gene         | 1 | 32.000 | 1 | 1_Testes_ARID4B: |
| 1_Testes_ARID4B:                | 324 in gene         | 1 | 37.000 | 1 | 1_Testes_ARID4B: |
| 1_Testes_ARID4B:                | 101 in gene         | 1 | 31.000 | 1 | 1_Testes_ARID4B: |
| 1_Testes_ARID4B:                | 107 in gene         | 1 | 31.000 | 1 | 1_Testes_ARID4B: |
| 1_Testes_ARID4B:                | 251 in gene         | 1 | 36.000 | 1 | 1_Testes_ARID4B: |
| 1_Testes_ARID4B:                | 52556 downstream    | 1 | 36.000 | 1 | 1_Testes_ARID4B: |
| 1_Testes_ARID4B:                | 155 in gene         | 1 | 36.000 | 1 | 1_Testes_ARID4B: |
| 1_Testes_ARID4B:                | 567 in gene         | 1 | 21.000 | 1 | 1_Testes_ARID4B: |
| 1_Testes_ARID4B: 478, -386      | in gene, upstream   | 1 | 28.000 | 2 | 1_Testes_ARID4B: |

|                                     |                          |   |        |   |                  |
|-------------------------------------|--------------------------|---|--------|---|------------------|
| 1_Testes_ARID4B:                    | 557 in gene              | 1 | 21.000 | 1 | 1_Testes_ARID4B: |
| 1_Testes_ARID4B:                    | -681 upstream            | 1 | 21.000 | 1 | 1_Testes_ARID4B: |
| 1_Testes_ARID4B:                    | 341 in gene              | 1 | 32.000 | 1 | 1_Testes_ARID4B: |
| 1_Testes_ARID4B:                    | 75 in gene               | 1 | 24.000 | 1 | 1_Testes_ARID4B: |
| 1_Testes_ARID4B:                    | -3796 upstream           | 1 | 24.000 | 1 | 1_Testes_ARID4B: |
| 1_Testes_ARID4B:                    | 401 in gene              | 1 | 31.000 | 1 | 1_Testes_ARID4B: |
| 1_Testes_ARID4B:                    | 394 in gene              | 1 | 18.000 | 1 | 1_Testes_ARID4B: |
| 1_Testes_ARID4B:                    | 439 in gene              | 1 | 16.000 | 1 | 1_Testes_ARID4B: |
| 1_Testes_ARID4B:                    | 348 in gene              | 1 | 32.000 | 1 | 1_Testes_ARID4B: |
| 1_Testes_ARID4B:                    | 23092 downstream         | 1 | 32.000 | 1 | 1_Testes_ARID4B: |
| 1_Testes_ARID4B:                    | 6679 in gene             | 1 | 23.000 | 1 | 1_Testes_ARID4B: |
| 1_Testes_ARID4B:                    | -148 upstream            | 1 | 23.000 | 1 | 1_Testes_ARID4B: |
| 1_Testes_ARID4B:                    | 662 in gene              | 1 | 23.000 | 1 | 1_Testes_ARID4B: |
| 1_Testes_ARID4B:                    | -5335 upstream           | 1 | 32.000 | 1 | 1_Testes_ARID4B: |
| 1_Testes_ARID4B:                    | 179 in gene              | 1 | 32.000 | 1 | 1_Testes_ARID4B: |
| 1_Testes_ARID4B:                    | 27389 in gene            | 1 | 19.000 | 1 | 1_Testes_ARID4B: |
| 1_Testes_ARID4B:                    | 104 in gene              | 1 | 34.000 | 1 | 1_Testes_ARID4B: |
| 1_Testes_ARID4B:                    | 25 in gene               | 1 | 26.000 | 1 | 1_Testes_ARID4B: |
| 1_Testes_ARID4B:                    | -10190 upstream          | 1 | 26.000 | 1 | 1_Testes_ARID4B: |
| 1_Testes_ARID4B: 22802, 498         | in gene, in gene         | 1 | 28.000 | 2 | 1_Testes_ARID4B: |
| 1_Testes_ARID4B: 7017, 225          | in gene, in gene         | 1 | 20.500 | 2 | 1_Testes_ARID4B: |
| 1_Testes_ARID4B: -9421, -2629       | upstream, upstream       | 1 | 20.500 | 2 | 1_Testes_ARID4B: |
| 1_Testes_ARID4B: 4443, 8187         | downstream, downstre     | 1 | 24.000 | 2 | 1_Testes_ARID4B: |
| 1_Testes_ARID4B: 5, 3749, 8565      | in gene, in gene, downst | 1 | 23.667 | 3 | 1_Testes_ARID4B: |
| 1_Testes_ARID4B:                    | 157 in gene              | 1 | 33.000 | 1 | 1_Testes_ARID4B: |
| 1_Testes_ARID4B: 1194, -438, -3078  | in gene, upstream, upst  | 1 | 22.333 | 3 | 1_Testes_ARID4B: |
| 1_Testes_ARID4B:                    | 436 in gene              | 1 | 31.000 | 1 | 1_Testes_ARID4B: |
| 1_Testes_ARID4B:                    | 458 in gene              | 1 | 20.000 | 1 | 1_Testes_ARID4B: |
| 1_Testes_ARID4B:                    | 29997 downstream         | 1 | 19.000 | 1 | 1_Testes_ARID4B: |
| 1_Testes_ARID4B:                    | -50 upstream             | 1 | 19.000 | 1 | 1_Testes_ARID4B: |
| 1_Testes_ARID4B:                    | -746 upstream            | 1 | 40.000 | 1 | 1_Testes_ARID4B: |
| 1_Testes_ARID4B:                    | 690 in gene              | 1 | 19.000 | 1 | 1_Testes_ARID4B: |
| 1_Testes_ARID4B:                    | -147 upstream            | 1 | 21.000 | 1 | 1_Testes_ARID4B: |
| 1_Testes_ARID4B:                    | -60 upstream             | 1 | 21.000 | 1 | 1_Testes_ARID4B: |
| 1_Testes_ARID4B:                    | 6367 downstream          | 1 | 21.000 | 1 | 1_Testes_ARID4B: |
| 1_Testes_ARID4B:                    | -7210 upstream           | 1 | 21.000 | 1 | 1_Testes_ARID4B: |
| 1_Testes_ARID4B: 9259, -8597        | in gene, upstream        | 1 | 22.000 | 2 | 1_Testes_ARID4B: |
| 1_Testes_ARID4B: 2684, 20540        | in gene, downstream      | 1 | 22.000 | 2 | 1_Testes_ARID4B: |
| 1_Testes_ARID4B:                    | 779 in gene              | 1 | 22.000 | 1 | 1_Testes_ARID4B: |
| 1_Testes_ARID4B:                    | 4816 downstream          | 1 | 22.000 | 1 | 1_Testes_ARID4B: |
| 1_Testes_ARID4B: 11480, -6376       | downstream, upstream     | 1 | 22.000 | 2 | 1_Testes_ARID4B: |
| 1_Testes_ARID4B: -3091, -7251       | upstream, upstream       | 1 | 22.000 | 2 | 1_Testes_ARID4B: |
| 1_Testes_ARID4B: 5706, 1546, -7318  | downstream, in gene, u   | 1 | 20.000 | 3 | 1_Testes_ARID4B: |
| 1_Testes_ARID4B: 8501, 4341, -4523  | downstream, downstre     | 1 | 20.000 | 3 | 1_Testes_ARID4B: |
| 1_Testes_ARID4B: 19190, 15030, 6166 | downstream, downstre     | 1 | 20.000 | 3 | 1_Testes_ARID4B: |
| 1_Testes_ARID4B:                    | 11079 downstream         | 1 | 16.000 | 1 | 1_Testes_ARID4B: |
| 1_Testes_ARID4B:                    | 76 in gene               | 1 | 30.000 | 1 | 1_Testes_ARID4B: |

|                                      |                       |   |        |   |                  |
|--------------------------------------|-----------------------|---|--------|---|------------------|
| 1_Testes_ARID4B:                     | 207 in gene           | 1 | 32.000 | 1 | 1_Testes_ARID4B: |
| 1_Testes_ARID4B:                     | 665 in gene           | 1 | 36.000 | 1 | 1_Testes_ARID4B: |
| 1_Testes_ARID4B:                     | -28 upstream          | 1 | 18.000 | 1 | 1_Testes_ARID4B: |
| 1_Testes_ARID4B:                     | 365 in gene           | 1 | 27.000 | 1 | 1_Testes_ARID4B: |
| 1_Testes_ARID4B:                     | 190 in gene           | 1 | 17.000 | 1 | 1_Testes_ARID4B: |
| 1_Testes_ARID4B:                     | -2344 upstream        | 1 | 27.000 | 1 | 1_Testes_ARID4B: |
| 1_Testes_ARID4B:                     | 361 in gene           | 1 | 27.000 | 1 | 1_Testes_ARID4B: |
| 1_Testes_ARID4B:                     | 68 in gene            | 1 | 20.000 | 1 | 1_Testes_ARID4B: |
| 1_Testes_ARID4B:                     | 175 in gene           | 1 | 34.000 | 1 | 1_Testes_ARID4B: |
| 1_Testes_ARID4B:                     | 244 in gene           | 1 | 26.000 | 1 | 1_Testes_ARID4B: |
| 1_Testes_ARID4B:                     | 103 in gene           | 1 | 27.000 | 1 | 1_Testes_ARID4B: |
| 1_Testes_ARID4B:                     | 236 in gene           | 1 | 27.000 | 1 | 1_Testes_ARID4B: |
| 1_Testes_ARID4B:                     | -1956 upstream        | 1 | 17.000 | 1 | 1_Testes_ARID4B: |
| 1_Testes_ARID4B:                     | 421 in gene           | 1 | 20.000 | 1 | 1_Testes_ARID4B: |
| 1_Testes_ARID4B:                     | 133 in gene           | 1 | 25.000 | 1 | 1_Testes_ARID4B: |
| 1_Testes_ARID4B:                     | 24990 in gene         | 1 | 33.000 | 1 | 1_Testes_ARID4B: |
| 1_Testes_ARID4B:                     | 115 in gene           | 1 | 33.000 | 1 | 1_Testes_ARID4B: |
| 1_Testes_ARID4B:                     | 127 in gene           | 1 | 31.000 | 1 | 1_Testes_ARID4B: |
| 1_Testes_ARID4B:                     | 681 in gene           | 1 | 31.000 | 1 | 1_Testes_ARID4B: |
| 1_Testes_ARID4B:                     | 669 in gene           | 1 | 37.000 | 1 | 1_Testes_ARID4B: |
| 1_Testes_ARID4B:                     | 605 in gene           | 1 | 25.000 | 1 | 1_Testes_ARID4B: |
| 1_Testes_ARID4B:                     | 586 in gene           | 1 | 27.000 | 1 | 1_Testes_ARID4B: |
| 1_Testes_ARID4B:                     | 402 in gene           | 1 | 21.000 | 1 | 1_Testes_ARID4B: |
| 1_Testes_ARID4B:                     | 217 in gene           | 1 | 27.000 | 1 | 1_Testes_ARID4B: |
| 1_Testes_ARID4B:                     | 511 in gene           | 1 | 21.000 | 1 | 1_Testes_ARID4B: |
| 1_Testes_ARID4B:                     | 190 in gene           | 1 | 29.000 | 1 | 1_Testes_ARID4B: |
| 1_Testes_ARID4B:                     | 537 in gene           | 1 | 31.000 | 1 | 1_Testes_ARID4B: |
| 1_Testes_ARID4B:                     | 55 in gene            | 1 | 28.000 | 1 | 1_Testes_ARID4B: |
| 1_Testes_ARID4B: -2197, 14779        | upstream, downstream  | 1 | 23.500 | 2 | 1_Testes_ARID4B: |
| 1_Testes_ARID4B: -10363, 6613        | upstream, downstream  | 1 | 23.500 | 2 | 1_Testes_ARID4B: |
| 1_Testes_ARID4B:                     | 285 in gene           | 1 | 19.000 | 1 | 1_Testes_ARID4B: |
| 1_Testes_ARID4B: 18372, 68           | downstream, in gene   | 1 | 18.000 | 2 | 1_Testes_ARID4B: |
| 1_Testes_ARID4B:                     | 10267 downstream      | 1 | 17.000 | 1 | 1_Testes_ARID4B: |
| 1_Testes_ARID4B:                     | 24963 downstream      | 1 | 42.000 | 1 | 1_Testes_ARID4B: |
| 1_Testes_ARID4B:                     | 262 in gene           | 1 | 42.000 | 1 | 1_Testes_ARID4B: |
| 1_Testes_ARID4B:                     | 613 in gene           | 1 | 42.000 | 1 | 1_Testes_ARID4B: |
| 1_Testes_ARID4B:                     | -164 upstream         | 1 | 30.000 | 1 | 1_Testes_ARID4B: |
| 1_Testes_ARID4B: 1115, -341          | in gene, upstream     | 1 | 25.500 | 2 | 1_Testes_ARID4B: |
| 1_Testes_ARID4B:                     | 524 in gene           | 1 | 29.000 | 1 | 1_Testes_ARID4B: |
| 1_Testes_ARID4B:                     | 566 in gene           | 1 | 28.000 | 1 | 1_Testes_ARID4B: |
| 1_Testes_ARID4B: 16464, 20496        | in gene, downstream   | 1 | 26.000 | 2 | 1_Testes_ARID4B: |
| 1_Testes_ARID4B: 3883, -149          | downstream, upstream  | 1 | 26.000 | 2 | 1_Testes_ARID4B: |
| 1_Testes_ARID4B: -3965, 67           | upstream, in gene     | 1 | 26.000 | 2 | 1_Testes_ARID4B: |
| 1_Testes_ARID4B: -7156, -3124, 13532 | upstream, upstream, d | 1 | 22.667 | 3 | 1_Testes_ARID4B: |
| 1_Testes_ARID4B:                     | -1151 upstream        | 1 | 16.000 | 1 | 1_Testes_ARID4B: |
| 1_Testes_ARID4B:                     | -7014 upstream        | 1 | 16.000 | 1 | 1_Testes_ARID4B: |
| 1_Testes_ARID4B: 297, 14356          | in gene, downstream   | 1 | 25.500 | 2 | 1_Testes_ARID4B: |

|                               |                      |   |        |   |                  |
|-------------------------------|----------------------|---|--------|---|------------------|
| 1_Testes_ARID4B: -7295, 6764  | upstream, downstream | 1 | 25.500 | 2 | 1_Testes_ARID4B: |
| 1_Testes_ARID4B: 366, 6494    | in gene, downstream  | 1 | 24.500 | 2 | 1_Testes_ARID4B: |
| 1_Testes_ARID4B: 5589, -539   | downstream, upstream | 1 | 24.500 | 2 | 1_Testes_ARID4B: |
| 1_Testes_ARID4B: 9157, 3029   | downstream, in gene  | 1 | 24.500 | 2 | 1_Testes_ARID4B: |
| 1_Testes_ARID4B: 1760, 26413  | in gene, downstream  | 1 | 19.500 | 2 | 1_Testes_ARID4B: |
| 1_Testes_ARID4B: -5842, -9365 | upstream, upstream   | 1 | 18.000 | 2 | 1_Testes_ARID4B: |
| 1_Testes_ARID4B: 5817, 9340   | in gene, downstream  | 1 | 18.000 | 2 | 1_Testes_ARID4B: |
| 1_Testes_ARID4B: -3703, -180  | upstream, upstream   | 1 | 18.000 | 2 | 1_Testes_ARID4B: |
| 1_Testes_ARID4B: 164, -8476   | in gene, upstream    | 1 | 25.500 | 2 | 1_Testes_ARID4B: |
| 1_Testes_ARID4B: -8599, 41    | upstream, in gene    | 1 | 25.500 | 2 | 1_Testes_ARID4B: |
| 1_Testes_ARID4B:              | 16916 downstream     | 1 | 21.000 | 1 | 1_Testes_ARID4B: |
| 1_Testes_ARID4B: 75278, 78    | in gene, in gene     | 1 | 25.500 | 2 | 1_Testes_ARID4B: |
| 1_Testes_ARID4B: -155, 15077  | upstream, downstream | 1 | 28.000 | 2 | 1_Testes_ARID4B: |
| 1_Testes_ARID4B: 10004, 6292  | in gene, in gene     | 1 | 19.500 | 2 | 1_Testes_ARID4B: |
| 1_Testes_ARID4B:              | 217 in gene          | 1 | 34.000 | 1 | 1_Testes_ARID4B: |
| 1_Testes_ARID4B:              | 46 in gene           | 1 | 24.000 | 1 | 1_Testes_ARID4B: |
| 1_Testes_ARID4B: 41258, 170   | downstream, in gene  | 1 | 29.000 | 2 | 1_Testes_ARID4B: |
| 1_Testes_ARID4B:              | 2997 downstream      | 1 | 24.000 | 1 | 1_Testes_ARID4B: |
| 1_Testes_ARID4B:              | 8274 downstream      | 1 | 31.000 | 1 | 1_Testes_ARID4B: |
| 1_Testes_ARID4B:              | 184 in gene          | 1 | 31.000 | 1 | 1_Testes_ARID4B: |
| 1_Testes_ARID4B: 18726, -8986 | in gene, upstream    | 1 | 20.500 | 2 | 1_Testes_ARID4B: |
| 1_Testes_ARID4B:              | 1670 in gene         | 1 | 21.000 | 1 | 1_Testes_ARID4B: |
| 1_Testes_ARID4B:              | 138 in gene          | 1 | 18.000 | 1 | 1_Testes_ARID4B: |
| 1_Testes_ARID4B:              | 11801 downstream     | 1 | 20.000 | 1 | 1_Testes_ARID4B: |
| 1_Testes_ARID4B:              | 397 in gene          | 1 | 22.000 | 1 | 1_Testes_ARID4B: |
| 1_Testes_ARID4B: 221, 5869    | in gene, downstream  | 1 | 27.500 | 2 | 1_Testes_ARID4B: |
| 1_Testes_ARID4B: -5636, 12    | upstream, in gene    | 1 | 27.500 | 2 | 1_Testes_ARID4B: |
| 1_Testes_ARID4B: 126, -7394   | in gene, upstream    | 1 | 36.500 | 2 | 1_Testes_ARID4B: |
| 1_Testes_ARID4B: -7195, 325   | upstream, in gene    | 1 | 36.500 | 2 | 1_Testes_ARID4B: |
| 1_Testes_ARID4B:              | -709 upstream        | 1 | 31.000 | 1 | 1_Testes_ARID4B: |
| 1_Testes_ARID4B:              | -450 upstream        | 1 | 31.000 | 1 | 1_Testes_ARID4B: |
| 1_Testes_ARID4B:              | 418 in gene          | 1 | 37.000 | 1 | 1_Testes_ARID4B: |
| 1_Testes_ARID4B:              | 60624 downstream     | 1 | 37.000 | 1 | 1_Testes_ARID4B: |
| 1_Testes_ARID4B:              | 66 in gene           | 1 | 24.000 | 1 | 1_Testes_ARID4B: |
| 1_Testes_ARID4B:              | -9292 upstream       | 1 | 28.000 | 1 | 1_Testes_ARID4B: |
| 1_Testes_ARID4B:              | 507 in gene          | 1 | 28.000 | 1 | 1_Testes_ARID4B: |
| 1_Testes_ARID4B:              | 355 in gene          | 1 | 33.000 | 1 | 1_Testes_ARID4B: |
| 1_Testes_ARID4B:              | 27335 downstream     | 1 | 33.000 | 1 | 1_Testes_ARID4B: |
| 1_Testes_ARID4B:              | 26300 downstream     | 1 | 26.000 | 1 | 1_Testes_ARID4B: |
| 1_Testes_ARID4B:              | 264 in gene          | 1 | 26.000 | 1 | 1_Testes_ARID4B: |
| 1_Testes_ARID4B:              | 50 in gene           | 1 | 33.000 | 1 | 1_Testes_ARID4B: |
| 1_Testes_ARID4B:              | -251 upstream        | 1 | 33.000 | 1 | 1_Testes_ARID4B: |
| 1_Testes_ARID4B:              | 167 in gene          | 1 | 36.000 | 1 | 1_Testes_ARID4B: |
| 1_Testes_ARID4B:              | -123 upstream        | 1 | 22.000 | 1 | 1_Testes_ARID4B: |
| 1_Testes_ARID4B:              | 340 in gene          | 1 | 27.000 | 1 | 1_Testes_ARID4B: |
| 1_Testes_ARID4B:              | -3684 upstream       | 1 | 38.000 | 1 | 1_Testes_ARID4B: |
| 1_Testes_ARID4B:              | 213 in gene          | 1 | 38.000 | 1 | 1_Testes_ARID4B: |

|                               |                      |   |        |   |                  |
|-------------------------------|----------------------|---|--------|---|------------------|
| 1_Testes_ARID4B:              | 789 in gene          | 1 | 24.000 | 1 | 1_Testes_ARID4B: |
| 1_Testes_ARID4B:              | 204 in gene          | 1 | 22.000 | 1 | 1_Testes_ARID4B: |
| 1_Testes_ARID4B:              | 36631 downstream     | 1 | 37.000 | 1 | 1_Testes_ARID4B: |
| 1_Testes_ARID4B:              | 426 in gene          | 1 | 37.000 | 1 | 1_Testes_ARID4B: |
| 1_Testes_ARID4B:              | 286 in gene          | 1 | 29.000 | 1 | 1_Testes_ARID4B: |
| 1_Testes_ARID4B: 93899, 73163 | in gene, in gene     | 1 | 24.000 | 2 | 1_Testes_ARID4B: |
| 1_Testes_ARID4B:              | -134 upstream        | 1 | 20.000 | 1 | 1_Testes_ARID4B: |
| 1_Testes_ARID4B:              | 189 in gene          | 1 | 32.000 | 1 | 1_Testes_ARID4B: |
| 1_Testes_ARID4B: 378, 2746    | in gene, in gene     | 1 | 21.000 | 2 | 1_Testes_ARID4B: |
| 1_Testes_ARID4B:              | 59 in gene           | 1 | 22.000 | 1 | 1_Testes_ARID4B: |
| 1_Testes_ARID4B:              | 113 in gene          | 1 | 36.000 | 1 | 1_Testes_ARID4B: |
| 1_Testes_ARID4B:              | 142 in gene          | 1 | 27.000 | 1 | 1_Testes_ARID4B: |
| 1_Testes_ARID4B:              | 277 in gene          | 1 | 27.000 | 1 | 1_Testes_ARID4B: |
| 1_Testes_ARID4B:              | -77 upstream         | 1 | 21.000 | 1 | 1_Testes_ARID4B: |
| 1_Testes_ARID4B: 30164, 244   | downstream, in gene  | 1 | 24.500 | 2 | 1_Testes_ARID4B: |
| 1_Testes_ARID4B:              | 26762 downstream     | 1 | 28.000 | 1 | 1_Testes_ARID4B: |
| 1_Testes_ARID4B: 129881, 473  | in gene, in gene     | 1 | 21.000 | 2 | 1_Testes_ARID4B: |
| 1_Testes_ARID4B:              | 131 in gene          | 1 | 25.000 | 1 | 1_Testes_ARID4B: |
| 1_Testes_ARID4B:              | 73 in gene           | 1 | 19.000 | 1 | 1_Testes_ARID4B: |
| 1_Testes_ARID4B:              | -674 upstream        | 1 | 22.000 | 1 | 1_Testes_ARID4B: |
| 1_Testes_ARID4B:              | 117 in gene          | 1 | 36.000 | 1 | 1_Testes_ARID4B: |
| 1_Testes_ARID4B:              | 201 in gene          | 1 | 25.000 | 1 | 1_Testes_ARID4B: |
| 1_Testes_ARID4B:              | 46 in gene           | 1 | 32.000 | 1 | 1_Testes_ARID4B: |
| 1_Testes_ARID4B:              | 30890 downstream     | 1 | 32.000 | 1 | 1_Testes_ARID4B: |
| 1_Testes_ARID4B:              | 127 in gene          | 1 | 31.000 | 1 | 1_Testes_ARID4B: |
| 1_Testes_ARID4B: 45, 46013    | in gene, downstream  | 1 | 31.000 | 2 | 1_Testes_ARID4B: |
| 1_Testes_ARID4B:              | 431 in gene          | 1 | 35.000 | 1 | 1_Testes_ARID4B: |
| 1_Testes_ARID4B:              | 400 in gene          | 1 | 24.000 | 1 | 1_Testes_ARID4B: |
| 1_Testes_ARID4B: 29961, 30793 | downstream, downstre | 1 | 31.500 | 2 | 1_Testes_ARID4B: |
| 1_Testes_ARID4B: 956, 124     | in gene, in gene     | 1 | 31.500 | 2 | 1_Testes_ARID4B: |
| 1_Testes_ARID4B: -1351, -519  | upstream, upstream   | 1 | 31.500 | 2 | 1_Testes_ARID4B: |
| 1_Testes_ARID4B:              | 24701 downstream     | 1 | 24.000 | 1 | 1_Testes_ARID4B: |
| 1_Testes_ARID4B:              | -189 upstream        | 1 | 24.000 | 1 | 1_Testes_ARID4B: |
| 1_Testes_ARID4B:              | 16864 downstream     | 1 | 27.000 | 1 | 1_Testes_ARID4B: |
| 1_Testes_ARID4B:              | 82 in gene           | 1 | 27.000 | 1 | 1_Testes_ARID4B: |
| 1_Testes_ARID4B:              | -7029 upstream       | 1 | 26.000 | 1 | 1_Testes_ARID4B: |
| 1_Testes_ARID4B:              | 267 in gene          | 1 | 26.000 | 1 | 1_Testes_ARID4B: |
| 1_Testes_ARID4B:              | 11297 in gene        | 1 | 27.000 | 1 | 1_Testes_ARID4B: |
| 1_Testes_ARID4B: -817, 11151  | upstream, downstream | 1 | 25.500 | 2 | 1_Testes_ARID4B: |
| 1_Testes_ARID4B:              | 7098 in gene         | 1 | 24.000 | 1 | 1_Testes_ARID4B: |
| 1_Testes_ARID4B:              | 150 in gene          | 1 | 28.000 | 1 | 1_Testes_ARID4B: |
| 1_Testes_ARID4B: -194, 73342  | upstream, downstream | 1 | 25.500 | 2 | 1_Testes_ARID4B: |
| 1_Testes_ARID4B:              | -4309 upstream       | 1 | 23.000 | 1 | 1_Testes_ARID4B: |
| 1_Testes_ARID4B: 252, 19420   | in gene, downstream  | 1 | 28.500 | 2 | 1_Testes_ARID4B: |
| 1_Testes_ARID4B:              | 171 in gene          | 1 | 34.000 | 1 | 1_Testes_ARID4B: |
| 1_Testes_ARID4B:              | 59069 downstream     | 1 | 32.000 | 1 | 1_Testes_ARID4B: |
| 1_Testes_ARID4B:              | 37 in gene           | 1 | 32.000 | 1 | 1_Testes_ARID4B: |

|                                      |                      |   |        |   |                  |
|--------------------------------------|----------------------|---|--------|---|------------------|
| 1_Testes_ARID4B:                     | 123 in gene          | 1 | 32.000 | 1 | 1_Testes_ARID4B: |
| 1_Testes_ARID4B:                     | 34019 downstream     | 1 | 61.000 | 1 | 1_Testes_ARID4B: |
| 1_Testes_ARID4B:                     | 167 in gene          | 1 | 61.000 | 1 | 1_Testes_ARID4B: |
| 1_Testes_ARID4B:                     | -473 upstream        | 1 | 61.000 | 1 | 1_Testes_ARID4B: |
| 1_Testes_ARID4B:                     | 29836 downstream     | 1 | 61.000 | 1 | 1_Testes_ARID4B: |
| 1_Testes_ARID4B:                     | 509 in gene          | 1 | 42.000 | 1 | 1_Testes_ARID4B: |
| 1_Testes_ARID4B:                     | 206 in gene          | 1 | 19.000 | 1 | 1_Testes_ARID4B: |
| 1_Testes_ARID4B:                     | 2690 downstream      | 1 | 19.000 | 1 | 1_Testes_ARID4B: |
| 1_Testes_ARID4B:                     | 74069 downstream     | 1 | 32.000 | 1 | 1_Testes_ARID4B: |
| 1_Testes_ARID4B:                     | 181 in gene          | 1 | 32.000 | 1 | 1_Testes_ARID4B: |
| 1_Testes_ARID4B:                     | 148 in gene          | 1 | 27.000 | 1 | 1_Testes_ARID4B: |
| 1_Testes_ARID4B:                     | 7068 in gene         | 1 | 41.000 | 1 | 1_Testes_ARID4B: |
| 1_Testes_ARID4B:                     | -231 upstream        | 1 | 22.000 | 1 | 1_Testes_ARID4B: |
| 1_Testes_ARID4B:                     | 35858 downstream     | 1 | 22.000 | 1 | 1_Testes_ARID4B: |
| 1_Testes_ARID4B:                     | 21017 in gene        | 1 | 31.000 | 1 | 1_Testes_ARID4B: |
| 1_Testes_ARID4B:                     | 139 in gene          | 1 | 31.000 | 1 | 1_Testes_ARID4B: |
| 1_Testes_ARID4B: 65211, 64235        | in gene, in gene     | 1 | 40.000 | 2 | 1_Testes_ARID4B: |
| 1_Testes_ARID4B: -532, 444           | upstream, in gene    | 1 | 40.000 | 2 | 1_Testes_ARID4B: |
| 1_Testes_ARID4B:                     | -234 upstream        | 1 | 28.000 | 1 | 1_Testes_ARID4B: |
| 1_Testes_ARID4B:                     | 191 in gene          | 1 | 28.000 | 1 | 1_Testes_ARID4B: |
| 1_Testes_ARID4B:                     | 767 in gene          | 1 | 42.000 | 1 | 1_Testes_ARID4B: |
| 1_Testes_ARID4B:                     | -3577 upstream       | 1 | 42.000 | 1 | 1_Testes_ARID4B: |
| 1_Testes_ARID4B:                     | -65 upstream         | 1 | 18.000 | 1 | 1_Testes_ARID4B: |
| 1_Testes_ARID4B:                     | -95 upstream         | 1 | 23.000 | 1 | 1_Testes_ARID4B: |
| 1_Testes_ARID4B:                     | 365 in gene          | 1 | 23.000 | 1 | 1_Testes_ARID4B: |
| 1_Testes_ARID4B:                     | 131 in gene          | 1 | 22.000 | 1 | 1_Testes_ARID4B: |
| 1_Testes_ARID4B:                     | 83 in gene           | 1 | 29.000 | 1 | 1_Testes_ARID4B: |
| 1_Testes_ARID4B:                     | 203 in gene          | 1 | 19.000 | 1 | 1_Testes_ARID4B: |
| 1_Testes_ARID4B:                     | 189 in gene          | 1 | 33.000 | 1 | 1_Testes_ARID4B: |
| 1_Testes_ARID4B:                     | 228 in gene          | 1 | 21.000 | 1 | 1_Testes_ARID4B: |
| 1_Testes_ARID4B:                     | 21070 in gene        | 1 | 33.000 | 1 | 1_Testes_ARID4B: |
| 1_Testes_ARID4B:                     | 163 in gene          | 1 | 22.000 | 1 | 1_Testes_ARID4B: |
| 1_Testes_ARID4B:                     | 379 in gene          | 1 | 21.000 | 1 | 1_Testes_ARID4B: |
| 1_Testes_ARID4B: 112, 49376          | in gene, downstream  | 1 | 26.000 | 2 | 1_Testes_ARID4B: |
| 1_Testes_ARID4B:                     | -302 upstream        | 1 | 33.000 | 1 | 1_Testes_ARID4B: |
| 1_Testes_ARID4B:                     | 191 in gene          | 1 | 33.000 | 1 | 1_Testes_ARID4B: |
| 1_Testes_ARID4B:                     | 5505 downstream      | 1 | 33.000 | 1 | 1_Testes_ARID4B: |
| 1_Testes_ARID4B:                     | 5910 downstream      | 1 | 33.000 | 1 | 1_Testes_ARID4B: |
| 1_Testes_ARID4B: 26229, -7147, -9291 | downstream, upstream | 1 | 24.000 | 3 | 1_Testes_ARID4B: |
| 1_Testes_ARID4B: -4777, -6921        | upstream, upstream   | 1 | 19.500 | 2 | 1_Testes_ARID4B: |
| 1_Testes_ARID4B: -4570, -6714        | upstream, upstream   | 1 | 19.500 | 2 | 1_Testes_ARID4B: |
| 1_Testes_ARID4B: 10631, 8487         | in gene, in gene     | 1 | 19.500 | 2 | 1_Testes_ARID4B: |
| 1_Testes_ARID4B: 190, 4659           | in gene, downstream  | 1 | 22.000 | 2 | 1_Testes_ARID4B: |
| 1_Testes_ARID4B: 5165, 696           | downstream, in gene  | 1 | 22.000 | 2 | 1_Testes_ARID4B: |
| 1_Testes_ARID4B: 20316, 15847        | downstream, downstre | 1 | 22.000 | 2 | 1_Testes_ARID4B: |
| 1_Testes_ARID4B:                     | -5511 upstream       | 1 | 27.000 | 1 | 1_Testes_ARID4B: |
| 1_Testes_ARID4B:                     | 730 in gene          | 1 | 27.000 | 1 | 1_Testes_ARID4B: |



|                               |                      |          |                    |
|-------------------------------|----------------------|----------|--------------------|
| 1_Testes_ARID4B: 353, 14689   | in gene, downstream  | 1 30.500 | 2 1_Testes_ARID4B: |
| 1_Testes_ARID4B:              | 164 in gene          | 1 34.000 | 1 1_Testes_ARID4B: |
| 1_Testes_ARID4B:              | 265 in gene          | 1 25.000 | 1 1_Testes_ARID4B: |
| 1_Testes_ARID4B:              | 528 in gene          | 1 17.000 | 1 1_Testes_ARID4B: |
| 1_Testes_ARID4B: 61, 35485    | in gene, downstream  | 1 33.000 | 2 1_Testes_ARID4B: |
| 1_Testes_ARID4B:              | -235 upstream        | 1 30.000 | 1 1_Testes_ARID4B: |
| 1_Testes_ARID4B: 13863, 20151 | in gene, downstream  | 1 22.500 | 2 1_Testes_ARID4B: |
| 1_Testes_ARID4B: 6479, 191    | downstream, in gene  | 1 22.500 | 2 1_Testes_ARID4B: |
| 1_Testes_ARID4B: 32482, 26194 | downstream, downstre | 1 22.500 | 2 1_Testes_ARID4B: |
| 1_Testes_ARID4B:              | 259 in gene          | 1 18.000 | 1 1_Testes_ARID4B: |
| 1_Testes_ARID4B:              | 16020 downstream     | 1 18.000 | 1 1_Testes_ARID4B: |
| 1_Testes_ARID4B:              | 206 in gene          | 1 26.000 | 1 1_Testes_ARID4B: |
| 1_Testes_ARID4B:              | -7676 upstream       | 1 26.000 | 1 1_Testes_ARID4B: |
| 1_Testes_ARID4B:              | 515 in gene          | 1 17.000 | 1 1_Testes_ARID4B: |
| 1_Testes_ARID4B:              | 67 in gene           | 1 34.000 | 1 1_Testes_ARID4B: |
| 1_Testes_ARID4B:              | -478 upstream        | 1 34.000 | 1 1_Testes_ARID4B: |
| 1_Testes_ARID4B:              | 7482 in gene         | 1 21.000 | 1 1_Testes_ARID4B: |
| 1_Testes_ARID4B:              | 29168 downstream     | 1 21.000 | 1 1_Testes_ARID4B: |
| 1_Testes_ARID4B:              | 424 in gene          | 1 29.000 | 1 1_Testes_ARID4B: |
| 1_Testes_ARID4B:              | 1235 in gene         | 1 29.000 | 1 1_Testes_ARID4B: |
| 1_Testes_ARID4B:              | 108730 in gene       | 1 24.000 | 1 1_Testes_ARID4B: |
| 1_Testes_ARID4B: 331, -7381   | in gene, upstream    | 1 29.500 | 2 1_Testes_ARID4B: |
| 1_Testes_ARID4B: -484, 7228   | upstream, downstream | 1 29.500 | 2 1_Testes_ARID4B: |
| 1_Testes_ARID4B: 7377, -335   | downstream, upstream | 1 29.500 | 2 1_Testes_ARID4B: |
| 1_Testes_ARID4B: -7474, 238   | upstream, in gene    | 1 29.500 | 2 1_Testes_ARID4B: |
| 1_Testes_ARID4B:              | 263 in gene          | 1 31.000 | 1 1_Testes_ARID4B: |
| 1_Testes_ARID4B:              | -389 upstream        | 1 31.000 | 1 1_Testes_ARID4B: |
| 1_Testes_ARID4B:              | -315 upstream        | 1 28.000 | 1 1_Testes_ARID4B: |
| 1_Testes_ARID4B:              | -415 upstream        | 1 19.000 | 1 1_Testes_ARID4B: |
| 1_Testes_ARID4B:              | 169 in gene          | 1 21.000 | 1 1_Testes_ARID4B: |
| 1_Testes_ARID4B: -145, 6927   | upstream, downstream | 1 26.000 | 2 1_Testes_ARID4B: |
| 1_Testes_ARID4B: -8836, -1764 | upstream, upstream   | 1 26.000 | 2 1_Testes_ARID4B: |
| 1_Testes_ARID4B:              | 1839 in gene         | 1 24.000 | 1 1_Testes_ARID4B: |
| 1_Testes_ARID4B:              | 9696 downstream      | 1 25.000 | 1 1_Testes_ARID4B: |
| 1_Testes_ARID4B:              | 189 in gene          | 1 25.000 | 1 1_Testes_ARID4B: |
| 1_Testes_ARID4B:              | -4017 upstream       | 1 34.000 | 1 1_Testes_ARID4B: |
| 1_Testes_ARID4B:              | 200 in gene          | 1 34.000 | 1 1_Testes_ARID4B: |
| 1_Testes_ARID4B:              | 19768 downstream     | 1 34.000 | 1 1_Testes_ARID4B: |
| 1_Testes_ARID4B:              | 912 in gene          | 1 19.000 | 1 1_Testes_ARID4B: |
| 1_Testes_ARID4B:              | 299 in gene          | 1 16.000 | 1 1_Testes_ARID4B: |
| 1_Testes_ARID4B:              | 333 in gene          | 1 20.000 | 1 1_Testes_ARID4B: |
| 1_Testes_ARID4B:              | 1497 in gene         | 1 38.000 | 1 1_Testes_ARID4B: |
| 1_Testes_ARID4B:              | 875 in gene          | 1 28.000 | 1 1_Testes_ARID4B: |
| 1_Testes_ARID4B:              | 79 in gene           | 1 30.000 | 1 1_Testes_ARID4B: |
| 1_Testes_ARID4B: 41311, 127   | downstream, in gene  | 1 30.000 | 2 1_Testes_ARID4B: |
| 1_Testes_ARID4B:              | -283 upstream        | 1 30.000 | 1 1_Testes_ARID4B: |
| 1_Testes_ARID4B:              | 327 in gene          | 1 23.000 | 1 1_Testes_ARID4B: |

|                               |                    |   |        |   |                  |
|-------------------------------|--------------------|---|--------|---|------------------|
| 1_Testes_ARID4B:              | 434 in gene        | 1 | 18.000 | 1 | 1_Testes_ARID4B: |
| 1_Testes_ARID4B:              | 249 in gene        | 1 | 15.000 | 1 | 1_Testes_ARID4B: |
| 1_Testes_ARID4B:              | 523 in gene        | 1 | 28.000 | 1 | 1_Testes_ARID4B: |
| 1_Testes_ARID4B:              | 290 in gene        | 1 | 28.000 | 1 | 1_Testes_ARID4B: |
| 1_Testes_ARID4B:              | 27501 in gene      | 1 | 19.000 | 1 | 1_Testes_ARID4B: |
| 1_Testes_ARID4B:              | 775 in gene        | 1 | 19.000 | 1 | 1_Testes_ARID4B: |
| 1_Testes_ARID4B:              | -1096 upstream     | 1 | 19.000 | 1 | 1_Testes_ARID4B: |
| 1_Testes_ARID4B: 2033, -1284  | in gene, upstream  | 1 | 21.000 | 2 | 1_Testes_ARID4B: |
| 1_Testes_ARID4B:              | -104 upstream      | 1 | 24.000 | 1 | 1_Testes_ARID4B: |
| 1_Testes_ARID4B:              | -8032 upstream     | 1 | 27.000 | 1 | 1_Testes_ARID4B: |
| 1_Testes_ARID4B:              | 45 in gene         | 1 | 27.000 | 1 | 1_Testes_ARID4B: |
| 1_Testes_ARID4B:              | 510 in gene        | 1 | 31.000 | 1 | 1_Testes_ARID4B: |
| 1_Testes_ARID4B:              | 98 in gene         | 1 | 24.000 | 1 | 1_Testes_ARID4B: |
| 1_Testes_ARID4B:              | 10471 downstream   | 1 | 41.000 | 1 | 1_Testes_ARID4B: |
| 1_Testes_ARID4B:              | 238 in gene        | 1 | 41.000 | 1 | 1_Testes_ARID4B: |
| 1_Testes_ARID4B:              | -4808 upstream     | 1 | 34.000 | 1 | 1_Testes_ARID4B: |
| 1_Testes_ARID4B:              | 765 in gene        | 1 | 34.000 | 1 | 1_Testes_ARID4B: |
| 1_Testes_ARID4B:              | 220 in gene        | 1 | 25.000 | 1 | 1_Testes_ARID4B: |
| 1_Testes_ARID4B:              | 193 in gene        | 1 | 25.000 | 1 | 1_Testes_ARID4B: |
| 1_Testes_ARID4B:              | 598 in gene        | 1 | 22.000 | 1 | 1_Testes_ARID4B: |
| 1_Testes_ARID4B:              | -512 upstream      | 1 | 22.000 | 1 | 1_Testes_ARID4B: |
| 1_Testes_ARID4B: 89568, -64   | in gene, upstream  | 1 | 22.000 | 2 | 1_Testes_ARID4B: |
| 1_Testes_ARID4B:              | 832 in gene        | 1 | 36.000 | 1 | 1_Testes_ARID4B: |
| 1_Testes_ARID4B:              | 733 in gene        | 1 | 36.000 | 1 | 1_Testes_ARID4B: |
| 1_Testes_ARID4B:              | 720 in gene        | 1 | 25.000 | 1 | 1_Testes_ARID4B: |
| 1_Testes_ARID4B:              | 58 in gene         | 1 | 28.000 | 1 | 1_Testes_ARID4B: |
| 1_Testes_ARID4B:              | 15679 downstream   | 1 | 34.000 | 1 | 1_Testes_ARID4B: |
| 1_Testes_ARID4B:              | 395 in gene        | 1 | 34.000 | 1 | 1_Testes_ARID4B: |
| 1_Testes_ARID4B:              | -10298 upstream    | 1 | 34.000 | 1 | 1_Testes_ARID4B: |
| 1_Testes_ARID4B:              | 958 in gene        | 1 | 14.000 | 1 | 1_Testes_ARID4B: |
| 1_Testes_ARID4B:              | 237 in gene        | 1 | 14.000 | 1 | 1_Testes_ARID4B: |
| 1_Testes_ARID4B:              | 17156 downstream   | 1 | 14.000 | 1 | 1_Testes_ARID4B: |
| 1_Testes_ARID4B:              | 12429 downstream   | 1 | 25.000 | 1 | 1_Testes_ARID4B: |
| 1_Testes_ARID4B:              | 387 in gene        | 1 | 25.000 | 1 | 1_Testes_ARID4B: |
| 1_Testes_ARID4B:              | 15217 downstream   | 1 | 25.000 | 1 | 1_Testes_ARID4B: |
| 1_Testes_ARID4B:              | 10084 downstream   | 1 | 30.000 | 1 | 1_Testes_ARID4B: |
| 1_Testes_ARID4B:              | -3464 upstream     | 1 | 30.000 | 1 | 1_Testes_ARID4B: |
| 1_Testes_ARID4B:              | 59 in gene         | 1 | 30.000 | 1 | 1_Testes_ARID4B: |
| 1_Testes_ARID4B:              | 308 in gene        | 1 | 20.000 | 1 | 1_Testes_ARID4B: |
| 1_Testes_ARID4B: -113, 5135   | upstream, in gene  | 1 | 22.000 | 2 | 1_Testes_ARID4B: |
| 1_Testes_ARID4B: -7147, -1899 | upstream, upstream | 1 | 22.000 | 2 | 1_Testes_ARID4B: |
| 1_Testes_ARID4B:              | -5492 upstream     | 1 | 23.000 | 1 | 1_Testes_ARID4B: |
| 1_Testes_ARID4B:              | 1413 in gene       | 1 | 20.000 | 1 | 1_Testes_ARID4B: |
| 1_Testes_ARID4B: 6088, -3203  | in gene, upstream  | 1 | 18.500 | 2 | 1_Testes_ARID4B: |
| 1_Testes_ARID4B: -6868, 2423  | upstream, in gene  | 1 | 18.500 | 2 | 1_Testes_ARID4B: |
| 1_Testes_ARID4B: -2445, 11037 | upstream, in gene  | 1 | 19.500 | 2 | 1_Testes_ARID4B: |
| 1_Testes_ARID4B:              | 7033 downstream    | 1 | 20.000 | 1 | 1_Testes_ARID4B: |

|                                          |                          |   |        |   |                  |
|------------------------------------------|--------------------------|---|--------|---|------------------|
| 1_Testes_ARID4B: 228, 1524, 5460, 10772  | in gene, in gene, down   | 1 | 22.250 | 4 | 1_Testes_ARID4B: |
| 1_Testes_ARID4B: -4966, -3670, 266, 557  | upstream, upstream, in   | 1 | 22.250 | 4 | 1_Testes_ARID4B: |
| 1_Testes_ARID4B: -10383, -9087, -5151, 1 | upstream, upstream, u    | 1 | 24.000 | 5 | 1_Testes_ARID4B: |
| 1_Testes_ARID4B:                         | 245 in gene              | 1 | 31.000 | 1 | 1_Testes_ARID4B: |
| 1_Testes_ARID4B: 23299, 499              | in gene, in gene         | 1 | 24.500 | 2 | 1_Testes_ARID4B: |
| 1_Testes_ARID4B:                         | -4967 upstream           | 1 | 32.000 | 1 | 1_Testes_ARID4B: |
| 1_Testes_ARID4B:                         | 91 in gene               | 1 | 22.000 | 1 | 1_Testes_ARID4B: |
| 1_Testes_ARID4B:                         | -413 upstream            | 1 | 22.000 | 1 | 1_Testes_ARID4B: |
| 1_Testes_ARID4B:                         | 191 in gene              | 1 | 28.000 | 1 | 1_Testes_ARID4B: |
| 1_Testes_ARID4B:                         | 344 in gene              | 1 | 23.000 | 1 | 1_Testes_ARID4B: |
| 1_Testes_ARID4B:                         | -9936 upstream           | 1 | 22.000 | 1 | 1_Testes_ARID4B: |
| 1_Testes_ARID4B: 1672, 24                | in gene, in gene         | 1 | 21.000 | 2 | 1_Testes_ARID4B: |
| 1_Testes_ARID4B:                         | 136 in gene              | 1 | 43.000 | 1 | 1_Testes_ARID4B: |
| 1_Testes_ARID4B: 10489, -9330            | downstream, upstream     | 1 | 36.000 | 2 | 1_Testes_ARID4B: |
| 1_Testes_ARID4B: 13987, -5832            | downstream, upstream     | 1 | 36.000 | 2 | 1_Testes_ARID4B: |
| 1_Testes_ARID4B:                         | 10657 in gene            | 1 | 29.000 | 1 | 1_Testes_ARID4B: |
| 1_Testes_ARID4B:                         | 26714 downstream         | 1 | 25.000 | 1 | 1_Testes_ARID4B: |
| 1_Testes_ARID4B:                         | 13 in gene               | 1 | 25.000 | 1 | 1_Testes_ARID4B: |
| 1_Testes_ARID4B:                         | 28628 in gene            | 1 | 20.000 | 1 | 1_Testes_ARID4B: |
| 1_Testes_ARID4B:                         | 572 in gene              | 1 | 29.000 | 1 | 1_Testes_ARID4B: |
| 1_Testes_ARID4B:                         | 13675 downstream         | 1 | 29.000 | 1 | 1_Testes_ARID4B: |
| 1_Testes_ARID4B: 529, 2705, 4241         | in gene, in gene, in gen | 1 | 27.333 | 3 | 1_Testes_ARID4B: |
| 1_Testes_ARID4B:                         | 73 in gene               | 1 | 28.000 | 1 | 1_Testes_ARID4B: |
| 1_Testes_ARID4B:                         | 4 in gene                | 1 | 24.000 | 1 | 1_Testes_ARID4B: |
| 1_Testes_ARID4B:                         | 405 in gene              | 1 | 23.000 | 1 | 1_Testes_ARID4B: |
| 1_Testes_ARID4B:                         | 23596 downstream         | 1 | 23.000 | 1 | 1_Testes_ARID4B: |
| 1_Testes_ARID4B:                         | 926 in gene              | 1 | 25.000 | 1 | 1_Testes_ARID4B: |
| 1_Testes_ARID4B: 5372, 220               | in gene, in gene         | 1 | 26.000 | 2 | 1_Testes_ARID4B: |
| 1_Testes_ARID4B: -4529, 623              | upstream, in gene        | 1 | 26.000 | 2 | 1_Testes_ARID4B: |
| 1_Testes_ARID4B:                         | 1216 in gene             | 1 | 21.000 | 1 | 1_Testes_ARID4B: |
| 1_Testes_ARID4B:                         | 502 in gene              | 1 | 20.000 | 1 | 1_Testes_ARID4B: |
| 1_Testes_ARID4B:                         | 804 in gene              | 1 | 23.000 | 1 | 1_Testes_ARID4B: |
| 1_Testes_ARID4B: 32522, 298              | downstream, in gene      | 1 | 27.500 | 2 | 1_Testes_ARID4B: |
| 1_Testes_ARID4B: 34811, 6128             | downstream, in gene      | 1 | 27.000 | 2 | 1_Testes_ARID4B: |
| 1_Testes_ARID4B:                         | 4732 downstream          | 1 | 20.000 | 1 | 1_Testes_ARID4B: |
| 1_Testes_ARID4B: 1011, 13251             | in gene, downstream      | 1 | 28.500 | 2 | 1_Testes_ARID4B: |
| 1_Testes_ARID4B:                         | 431 in gene              | 1 | 37.000 | 1 | 1_Testes_ARID4B: |
| 1_Testes_ARID4B: 19043, -1261            | downstream, upstream     | 1 | 28.000 | 2 | 1_Testes_ARID4B: |
| 1_Testes_ARID4B:                         | 423 in gene              | 1 | 19.000 | 1 | 1_Testes_ARID4B: |
| 1_Testes_ARID4B:                         | 25729 downstream         | 1 | 18.000 | 1 | 1_Testes_ARID4B: |
| 1_Testes_ARID4B:                         | 4216 in gene             | 1 | 18.000 | 1 | 1_Testes_ARID4B: |
| 1_Testes_ARID4B: -3433, 11511            | upstream, downstream     | 1 | 29.000 | 2 | 1_Testes_ARID4B: |
| 1_Testes_ARID4B: -6412, 8532             | upstream, downstream     | 1 | 29.000 | 2 | 1_Testes_ARID4B: |
| 1_Testes_ARID4B:                         | 816 in gene              | 1 | 40.000 | 1 | 1_Testes_ARID4B: |
| 1_Testes_ARID4B:                         | -8564 upstream           | 1 | 17.000 | 1 | 1_Testes_ARID4B: |
| 1_Testes_ARID4B:                         | 7922 downstream          | 1 | 17.000 | 1 | 1_Testes_ARID4B: |
| 1_Testes_ARID4B:                         | 8367 in gene             | 1 | 17.000 | 1 | 1_Testes_ARID4B: |

|                                          |                          |   |        |   |                  |
|------------------------------------------|--------------------------|---|--------|---|------------------|
| 1_Testes_ARID4B: 94, -7634               | in gene, upstream        | 1 | 21.000 | 2 | 1_Testes_ARID4B: |
| 1_Testes_ARID4B: 8289, 561               | downstream, in gene      | 1 | 21.000 | 2 | 1_Testes_ARID4B: |
| 1_Testes_ARID4B:                         | -3179 upstream           | 1 | 20.000 | 1 | 1_Testes_ARID4B: |
| 1_Testes_ARID4B:                         | 8324 downstream          | 1 | 25.000 | 1 | 1_Testes_ARID4B: |
| 1_Testes_ARID4B: 477, -9987              | in gene, upstream        | 1 | 27.000 | 2 | 1_Testes_ARID4B: |
| 1_Testes_ARID4B:                         | 22193 downstream         | 1 | 29.000 | 1 | 1_Testes_ARID4B: |
| 1_Testes_ARID4B:                         | 15089 downstream         | 1 | 27.000 | 1 | 1_Testes_ARID4B: |
| 1_Testes_ARID4B:                         | -677 upstream            | 1 | 27.000 | 1 | 1_Testes_ARID4B: |
| 1_Testes_ARID4B:                         | -1056 upstream           | 1 | 27.000 | 1 | 1_Testes_ARID4B: |
| 1_Testes_ARID4B:                         | 382 in gene              | 1 | 18.000 | 1 | 1_Testes_ARID4B: |
| 1_Testes_ARID4B: -5219, 6269, 11197, 26  | upstream, in gene, in g  | 1 | 17.750 | 4 | 1_Testes_ARID4B: |
| 1_Testes_ARID4B: 1099, -533              | in gene, upstream        | 1 | 26.500 | 2 | 1_Testes_ARID4B: |
| 1_Testes_ARID4B: -1497, 135, 15383       | upstream, in gene, dow   | 1 | 27.667 | 3 | 1_Testes_ARID4B: |
| 1_Testes_ARID4B: -9867, 5381             | upstream, in gene        | 1 | 29.500 | 2 | 1_Testes_ARID4B: |
| 1_Testes_ARID4B: 38286, 494              | downstream, in gene      | 1 | 30.500 | 2 | 1_Testes_ARID4B: |
| 1_Testes_ARID4B:                         | 11439 downstream         | 1 | 31.000 | 1 | 1_Testes_ARID4B: |
| 1_Testes_ARID4B: 9854, 270               | in gene, in gene         | 1 | 22.000 | 2 | 1_Testes_ARID4B: |
| 1_Testes_ARID4B: 35862, 198              | downstream, in gene      | 1 | 27.000 | 2 | 1_Testes_ARID4B: |
| 1_Testes_ARID4B:                         | 12032 downstream         | 1 | 34.000 | 1 | 1_Testes_ARID4B: |
| 1_Testes_ARID4B:                         | 357 in gene              | 1 | 25.000 | 1 | 1_Testes_ARID4B: |
| 1_Testes_ARID4B:                         | 21316 downstream         | 1 | 25.000 | 1 | 1_Testes_ARID4B: |
| 1_Testes_ARID4B:                         | 19292 downstream         | 1 | 30.000 | 1 | 1_Testes_ARID4B: |
| 1_Testes_ARID4B: -231, 25337             | upstream, downstream     | 1 | 35.500 | 2 | 1_Testes_ARID4B: |
| 1_Testes_ARID4B:                         | 273 in gene              | 1 | 41.000 | 1 | 1_Testes_ARID4B: |
| 1_Testes_ARID4B:                         | 3656 in gene             | 1 | 18.000 | 1 | 1_Testes_ARID4B: |
| 1_Testes_ARID4B:                         | 11701 downstream         | 1 | 18.000 | 1 | 1_Testes_ARID4B: |
| 1_Testes_ARID4B:                         | 1817 in gene             | 1 | 21.000 | 1 | 1_Testes_ARID4B: |
| 1_Testes_ARID4B:                         | -1719 upstream           | 1 | 21.000 | 1 | 1_Testes_ARID4B: |
| 1_Testes_ARID4B:                         | 14711 downstream         | 1 | 37.000 | 1 | 1_Testes_ARID4B: |
| 1_Testes_ARID4B:                         | 54 in gene               | 1 | 37.000 | 1 | 1_Testes_ARID4B: |
| 1_Testes_ARID4B:                         | 504 in gene              | 1 | 17.000 | 1 | 1_Testes_ARID4B: |
| 1_Testes_ARID4B: 33671, -4569            | downstream, upstream     | 1 | 18.000 | 2 | 1_Testes_ARID4B: |
| 1_Testes_ARID4B: 61905, 26097, -9402     | in gene, in gene, upstre | 1 | 20.333 | 3 | 1_Testes_ARID4B: |
| 1_Testes_ARID4B:                         | 4566 in gene             | 1 | 22.000 | 1 | 1_Testes_ARID4B: |
| 1_Testes_ARID4B:                         | 50689 downstream         | 1 | 22.000 | 1 | 1_Testes_ARID4B: |
| 1_Testes_ARID4B:                         | 851 in gene              | 1 | 22.000 | 1 | 1_Testes_ARID4B: |
| 1_Testes_ARID4B:                         | -2443 upstream           | 1 | 22.000 | 1 | 1_Testes_ARID4B: |
| 1_Testes_ARID4B: 18843, -7093            | downstream, upstream     | 1 | 19.500 | 2 | 1_Testes_ARID4B: |
| 1_Testes_ARID4B:                         | -9715 upstream           | 1 | 22.000 | 1 | 1_Testes_ARID4B: |
| 1_Testes_ARID4B: 5814, 1558, 678         | in gene, in gene, in gen | 1 | 27.667 | 3 | 1_Testes_ARID4B: |
| 1_Testes_ARID4B: -9955, -8899, -2947, 71 | upstream, upstream, up   | 1 | 22.800 | 5 | 1_Testes_ARID4B: |
| 1_Testes_ARID4B: 227, -8285              | in gene, upstream        | 1 | 25.000 | 2 | 1_Testes_ARID4B: |
| 1_Testes_ARID4B: -3631, 4881             | upstream, downstream     | 1 | 25.000 | 2 | 1_Testes_ARID4B: |
| 1_Testes_ARID4B: -8380, 132, 9508        | upstream, in gene, in g  | 1 | 24.000 | 3 | 1_Testes_ARID4B: |
| 1_Testes_ARID4B:                         | -1548 upstream           | 1 | 22.000 | 1 | 1_Testes_ARID4B: |
| 1_Testes_ARID4B:                         | 8987 downstream          | 1 | 23.000 | 1 | 1_Testes_ARID4B: |
| 1_Testes_ARID4B:                         | 856 in gene              | 1 | 23.000 | 1 | 1_Testes_ARID4B: |

|                                    |       |                         |   |        |   |                  |
|------------------------------------|-------|-------------------------|---|--------|---|------------------|
| 1_Testes_ARID4B:                   | 30281 | downstream              | 1 | 23.000 | 1 | 1_Testes_ARID4B: |
| 1_Testes_ARID4B:                   | 6442  | downstream              | 1 | 18.000 | 1 | 1_Testes_ARID4B: |
| 1_Testes_ARID4B:                   | 598   | in gene                 | 1 | 18.000 | 1 | 1_Testes_ARID4B: |
| 1_Testes_ARID4B:                   | 192   | in gene                 | 1 | 36.000 | 1 | 1_Testes_ARID4B: |
| 1_Testes_ARID4B: 34205, 6989       |       | downstream, in gene     | 1 | 29.000 | 2 | 1_Testes_ARID4B: |
| 1_Testes_ARID4B:                   | 12686 | downstream              | 1 | 24.000 | 1 | 1_Testes_ARID4B: |
| 1_Testes_ARID4B:                   | 402   | in gene                 | 1 | 24.000 | 1 | 1_Testes_ARID4B: |
| 1_Testes_ARID4B:                   | 12483 | downstream              | 1 | 24.000 | 1 | 1_Testes_ARID4B: |
| 1_Testes_ARID4B:                   | 9693  | downstream              | 1 | 24.000 | 1 | 1_Testes_ARID4B: |
| 1_Testes_ARID4B:                   | 223   | in gene                 | 1 | 26.000 | 1 | 1_Testes_ARID4B: |
| 1_Testes_ARID4B:                   | 267   | in gene                 | 1 | 26.000 | 1 | 1_Testes_ARID4B: |
| 1_Testes_ARID4B:                   | -9488 | upstream                | 1 | 26.000 | 1 | 1_Testes_ARID4B: |
| 1_Testes_ARID4B:                   | 309   | in gene                 | 1 | 26.000 | 1 | 1_Testes_ARID4B: |
| 1_Testes_ARID4B:                   | -4725 | upstream                | 1 | 26.000 | 1 | 1_Testes_ARID4B: |
| 1_Testes_ARID4B:                   | 4204  | in gene                 | 1 | 21.000 | 1 | 1_Testes_ARID4B: |
| 1_Testes_ARID4B:                   | 22600 | downstream              | 1 | 21.000 | 1 | 1_Testes_ARID4B: |
| 1_Testes_ARID4B:                   | 74589 | in gene                 | 1 | 17.000 | 1 | 1_Testes_ARID4B: |
| 1_Testes_ARID4B:                   | 38577 | downstream              | 1 | 30.000 | 1 | 1_Testes_ARID4B: |
| 1_Testes_ARID4B:                   | 312   | in gene                 | 1 | 30.000 | 1 | 1_Testes_ARID4B: |
| 1_Testes_ARID4B:                   | 742   | in gene                 | 1 | 30.000 | 1 | 1_Testes_ARID4B: |
| 1_Testes_ARID4B:                   | -805  | upstream                | 1 | 30.000 | 1 | 1_Testes_ARID4B: |
| 1_Testes_ARID4B:                   | 40342 | downstream              | 1 | 35.000 | 1 | 1_Testes_ARID4B: |
| 1_Testes_ARID4B: 60, 9804          |       | in gene, downstream     | 1 | 32.000 | 2 | 1_Testes_ARID4B: |
| 1_Testes_ARID4B: -9675, 69         |       | upstream, in gene       | 1 | 32.000 | 2 | 1_Testes_ARID4B: |
| 1_Testes_ARID4B:                   | 9975  | downstream              | 1 | 28.000 | 1 | 1_Testes_ARID4B: |
| 1_Testes_ARID4B:                   | 150   | in gene                 | 1 | 28.000 | 1 | 1_Testes_ARID4B: |
| 1_Testes_ARID4B: 13278, -3458      |       | downstream, upstream    | 1 | 24.000 | 2 | 1_Testes_ARID4B: |
| 1_Testes_ARID4B: 7193, -10055      |       | in gene, upstream       | 1 | 20.500 | 2 | 1_Testes_ARID4B: |
| 1_Testes_ARID4B:                   | 206   | in gene                 | 1 | 21.000 | 1 | 1_Testes_ARID4B: |
| 1_Testes_ARID4B:                   | 26879 | downstream              | 1 | 21.000 | 1 | 1_Testes_ARID4B: |
| 1_Testes_ARID4B: 310, -6346, -9194 |       | in gene, upstream, upst | 1 | 21.333 | 3 | 1_Testes_ARID4B: |
| 1_Testes_ARID4B: 6876, 220, -2628  |       | downstream, in gene, u  | 1 | 21.333 | 3 | 1_Testes_ARID4B: |
| 1_Testes_ARID4B: 13682, 10834      |       | downstream, downstre    | 1 | 21.000 | 2 | 1_Testes_ARID4B: |
| 1_Testes_ARID4B:                   | 559   | in gene                 | 1 | 30.000 | 1 | 1_Testes_ARID4B: |
| 1_Testes_ARID4B:                   | 20055 | downstream              | 1 | 29.000 | 1 | 1_Testes_ARID4B: |
| 1_Testes_ARID4B: -1866, 182        |       | upstream, in gene       | 1 | 27.500 | 2 | 1_Testes_ARID4B: |
| 1_Testes_ARID4B:                   | 200   | in gene                 | 1 | 37.000 | 1 | 1_Testes_ARID4B: |
| 1_Testes_ARID4B:                   | 19734 | downstream              | 1 | 37.000 | 1 | 1_Testes_ARID4B: |
| 1_Testes_ARID4B:                   | 21099 | downstream              | 1 | 36.000 | 1 | 1_Testes_ARID4B: |
| 1_Testes_ARID4B:                   | 178   | in gene                 | 1 | 36.000 | 1 | 1_Testes_ARID4B: |
| 1_Testes_ARID4B: 12615, -2617      |       | downstream, upstream    | 1 | 28.000 | 2 | 1_Testes_ARID4B: |
| 1_Testes_ARID4B:                   | 1054  | in gene                 | 1 | 20.000 | 1 | 1_Testes_ARID4B: |
| 1_Testes_ARID4B:                   | 9409  | downstream              | 1 | 20.000 | 1 | 1_Testes_ARID4B: |
| 1_Testes_ARID4B:                   | 42769 | downstream              | 1 | 20.000 | 1 | 1_Testes_ARID4B: |
| 1_Testes_ARID4B:                   | 170   | in gene                 | 1 | 19.000 | 1 | 1_Testes_ARID4B: |
| 1_Testes_ARID4B:                   | -5971 | upstream                | 1 | 19.000 | 1 | 1_Testes_ARID4B: |
| 1_Testes_ARID4B: 361, -7559        |       | in gene, upstream       | 1 | 21.500 | 2 | 1_Testes_ARID4B: |

|                                    |                         |          |                    |
|------------------------------------|-------------------------|----------|--------------------|
| 1_Testes_ARID4B: -7704, 216        | upstream, in gene       | 1 21.500 | 2 1_Testes_ARID4B: |
| 1_Testes_ARID4B:                   | 5371 in gene            | 1 22.000 | 1 1_Testes_ARID4B: |
| 1_Testes_ARID4B:                   | -6207 upstream          | 1 22.000 | 1 1_Testes_ARID4B: |
| 1_Testes_ARID4B:                   | 164 in gene             | 1 23.000 | 1 1_Testes_ARID4B: |
| 1_Testes_ARID4B: 21591, 151        | downstream, in gene     | 1 26.000 | 2 1_Testes_ARID4B: |
| 1_Testes_ARID4B:                   | 17838 downstream        | 1 29.000 | 1 1_Testes_ARID4B: |
| 1_Testes_ARID4B:                   | 10901 downstream        | 1 18.000 | 1 1_Testes_ARID4B: |
| 1_Testes_ARID4B:                   | -24 upstream            | 1 18.000 | 1 1_Testes_ARID4B: |
| 1_Testes_ARID4B:                   | 197 in gene             | 1 28.000 | 1 1_Testes_ARID4B: |
| 1_Testes_ARID4B:                   | 130 in gene             | 1 28.000 | 1 1_Testes_ARID4B: |
| 1_Testes_ARID4B:                   | 13423 downstream        | 1 27.000 | 1 1_Testes_ARID4B: |
| 1_Testes_ARID4B:                   | 7360 downstream         | 1 27.000 | 1 1_Testes_ARID4B: |
| 1_Testes_ARID4B:                   | 199 in gene             | 1 27.000 | 1 1_Testes_ARID4B: |
| 1_Testes_ARID4B:                   | 2874 in gene            | 1 18.000 | 1 1_Testes_ARID4B: |
| 1_Testes_ARID4B:                   | 310 in gene             | 1 19.000 | 1 1_Testes_ARID4B: |
| 1_Testes_ARID4B:                   | 4526 downstream         | 1 19.000 | 1 1_Testes_ARID4B: |
| 1_Testes_ARID4B:                   | 17176 downstream        | 1 33.000 | 1 1_Testes_ARID4B: |
| 1_Testes_ARID4B:                   | 126 in gene             | 1 33.000 | 1 1_Testes_ARID4B: |
| 1_Testes_ARID4B:                   | -171 upstream           | 1 33.000 | 1 1_Testes_ARID4B: |
| 1_Testes_ARID4B:                   | 9948 downstream         | 1 33.000 | 1 1_Testes_ARID4B: |
| 1_Testes_ARID4B:                   | 707 in gene             | 1 31.000 | 1 1_Testes_ARID4B: |
| 1_Testes_ARID4B:                   | -1313 upstream          | 1 31.000 | 1 1_Testes_ARID4B: |
| 1_Testes_ARID4B: 17373, 381        | downstream, in gene     | 1 25.500 | 2 1_Testes_ARID4B: |
| 1_Testes_ARID4B:                   | -716 upstream           | 1 20.000 | 1 1_Testes_ARID4B: |
| 1_Testes_ARID4B:                   | -10542 upstream         | 1 20.000 | 1 1_Testes_ARID4B: |
| 1_Testes_ARID4B:                   | -1410 upstream          | 1 20.000 | 1 1_Testes_ARID4B: |
| 1_Testes_ARID4B:                   | 2792 in gene            | 1 20.000 | 1 1_Testes_ARID4B: |
| 1_Testes_ARID4B:                   | -7071 upstream          | 1 20.000 | 1 1_Testes_ARID4B: |
| 1_Testes_ARID4B:                   | 130 in gene             | 1 25.000 | 1 1_Testes_ARID4B: |
| 1_Testes_ARID4B:                   | 65 in gene              | 1 22.000 | 1 1_Testes_ARID4B: |
| 1_Testes_ARID4B:                   | -7248 upstream          | 1 22.000 | 1 1_Testes_ARID4B: |
| 1_Testes_ARID4B:                   | 231 in gene             | 1 39.000 | 1 1_Testes_ARID4B: |
| 1_Testes_ARID4B:                   | 33889 downstream        | 1 39.000 | 1 1_Testes_ARID4B: |
| 1_Testes_ARID4B:                   | 271 in gene             | 1 27.000 | 1 1_Testes_ARID4B: |
| 1_Testes_ARID4B: -588, -2519       | upstream, upstream      | 1 20.500 | 2 1_Testes_ARID4B: |
| 1_Testes_ARID4B:                   | 136839 in gene          | 1 15.000 | 1 1_Testes_ARID4B: |
| 1_Testes_ARID4B:                   | 201 in gene             | 1 32.000 | 1 1_Testes_ARID4B: |
| 1_Testes_ARID4B:                   | 534 in gene             | 1 30.000 | 1 1_Testes_ARID4B: |
| 1_Testes_ARID4B:                   | 1091 in gene            | 1 32.000 | 1 1_Testes_ARID4B: |
| 1_Testes_ARID4B:                   | 728 in gene             | 1 27.000 | 1 1_Testes_ARID4B: |
| 1_Testes_ARID4B:                   | 398 in gene             | 1 31.000 | 1 1_Testes_ARID4B: |
| 1_Testes_ARID4B: -1063, 60985      | upstream, downstream    | 1 31.500 | 2 1_Testes_ARID4B: |
| 1_Testes_ARID4B:                   | 250 in gene             | 1 32.000 | 1 1_Testes_ARID4B: |
| 1_Testes_ARID4B:                   | 134 in gene             | 1 21.000 | 1 1_Testes_ARID4B: |
| 1_Testes_ARID4B:                   | 93 in gene              | 1 35.000 | 1 1_Testes_ARID4B: |
| 1_Testes_ARID4B:                   | 304 in gene             | 1 35.000 | 1 1_Testes_ARID4B: |
| 1_Testes_ARID4B: -2326, 250, 26394 | upstream, in gene, in g | 1 24.667 | 3 1_Testes_ARID4B: |

|                  |                                           |   |        |   |                  |
|------------------|-------------------------------------------|---|--------|---|------------------|
| 1_Testes_ARID4B: | 288 in gene                               | 1 | 29.000 | 1 | 1_Testes_ARID4B: |
| 1_Testes_ARID4B: | 122 in gene                               | 1 | 27.000 | 1 | 1_Testes_ARID4B: |
| 1_Testes_ARID4B: | 173 in gene                               | 1 | 19.000 | 1 | 1_Testes_ARID4B: |
| 1_Testes_ARID4B: | -10694 upstream                           | 1 | 35.000 | 1 | 1_Testes_ARID4B: |
| 1_Testes_ARID4B: | 94 in gene                                | 1 | 35.000 | 1 | 1_Testes_ARID4B: |
| 1_Testes_ARID4B: | -3039 upstream                            | 1 | 35.000 | 1 | 1_Testes_ARID4B: |
| 1_Testes_ARID4B: | -3334 upstream                            | 1 | 35.000 | 1 | 1_Testes_ARID4B: |
| 1_Testes_ARID4B: | 10388 downstream                          | 1 | 35.000 | 1 | 1_Testes_ARID4B: |
| 1_Testes_ARID4B: | 2175 in gene                              | 1 | 29.000 | 1 | 1_Testes_ARID4B: |
| 1_Testes_ARID4B: | -5480, 42120 upstream, in gene            | 1 | 27.000 | 2 | 1_Testes_ARID4B: |
| 1_Testes_ARID4B: | 22646 downstream                          | 1 | 25.000 | 1 | 1_Testes_ARID4B: |
| 1_Testes_ARID4B: | -1601, -2705, -4977 upstream, upstream, u | 1 | 22.000 | 3 | 1_Testes_ARID4B: |
| 1_Testes_ARID4B: | 3507, 2403, 131 in gene, in gene, in gen  | 1 | 22.000 | 3 | 1_Testes_ARID4B: |
| 1_Testes_ARID4B: | 114 in gene                               | 1 | 32.000 | 1 | 1_Testes_ARID4B: |
| 1_Testes_ARID4B: | 174 in gene                               | 1 | 32.000 | 1 | 1_Testes_ARID4B: |
| 1_Testes_ARID4B: | 124 in gene                               | 1 | 32.000 | 1 | 1_Testes_ARID4B: |
| 1_Testes_ARID4B: | -4857 upstream                            | 1 | 26.000 | 1 | 1_Testes_ARID4B: |
| 1_Testes_ARID4B: | 4712, 14264, 19352 in gene, downstream, c | 1 | 27.667 | 3 | 1_Testes_ARID4B: |
| 1_Testes_ARID4B: | 4237 downstream                           | 1 | 26.000 | 1 | 1_Testes_ARID4B: |
| 1_Testes_ARID4B: | -3245, 6307, 11395 upstream, downstream   | 1 | 27.667 | 3 | 1_Testes_ARID4B: |
| 1_Testes_ARID4B: | 15852, 6300, 1212 downstream, in gene, ii | 1 | 27.667 | 3 | 1_Testes_ARID4B: |
| 1_Testes_ARID4B: | 23790 downstream                          | 1 | 31.000 | 1 | 1_Testes_ARID4B: |
| 1_Testes_ARID4B: | 242 in gene                               | 1 | 32.000 | 1 | 1_Testes_ARID4B: |
| 1_Testes_ARID4B: | -10368 upstream                           | 1 | 18.000 | 1 | 1_Testes_ARID4B: |
| 1_Testes_ARID4B: | 10299 downstream                          | 1 | 18.000 | 1 | 1_Testes_ARID4B: |
| 1_Testes_ARID4B: | 8302 in gene                              | 1 | 18.000 | 1 | 1_Testes_ARID4B: |
| 1_Testes_ARID4B: | -10060 upstream                           | 1 | 18.000 | 1 | 1_Testes_ARID4B: |
| 1_Testes_ARID4B: | 6897, 4337, 321 in gene, in gene, in gen  | 1 | 19.333 | 3 | 1_Testes_ARID4B: |
| 1_Testes_ARID4B: | 15668, 13108, 9092 downstream, downstre   | 1 | 19.333 | 3 | 1_Testes_ARID4B: |
| 1_Testes_ARID4B: | -9869, 14211 upstream, in gene            | 1 | 19.500 | 2 | 1_Testes_ARID4B: |
| 1_Testes_ARID4B: | 15573 downstream                          | 1 | 21.000 | 1 | 1_Testes_ARID4B: |
| 1_Testes_ARID4B: | 170 in gene                               | 1 | 26.000 | 1 | 1_Testes_ARID4B: |
| 1_Testes_ARID4B: | -30 upstream                              | 1 | 26.000 | 1 | 1_Testes_ARID4B: |
| 1_Testes_ARID4B: | -9553 upstream                            | 1 | 26.000 | 1 | 1_Testes_ARID4B: |
| 1_Testes_ARID4B: | 18366 downstream                          | 1 | 22.000 | 1 | 1_Testes_ARID4B: |
| 1_Testes_ARID4B: | -5353 upstream                            | 1 | 22.000 | 1 | 1_Testes_ARID4B: |
| 1_Testes_ARID4B: | -597 upstream                             | 1 | 21.000 | 1 | 1_Testes_ARID4B: |
| 1_Testes_ARID4B: | 1453 in gene                              | 1 | 21.000 | 1 | 1_Testes_ARID4B: |
| 1_Testes_ARID4B: | 2948 downstream                           | 1 | 21.000 | 1 | 1_Testes_ARID4B: |
| 1_Testes_ARID4B: | 28031 downstream                          | 1 | 21.000 | 1 | 1_Testes_ARID4B: |
| 1_Testes_ARID4B: | 9848 downstream                           | 1 | 20.000 | 1 | 1_Testes_ARID4B: |
| 1_Testes_ARID4B: | 2113 in gene                              | 1 | 20.000 | 1 | 1_Testes_ARID4B: |
| 1_Testes_ARID4B: | -2551 upstream                            | 1 | 20.000 | 1 | 1_Testes_ARID4B: |
| 1_Testes_ARID4B: | -5138 upstream                            | 1 | 20.000 | 1 | 1_Testes_ARID4B: |
| 1_Testes_ARID4B: | 18656, 336 downstream, in gene            | 1 | 18.500 | 2 | 1_Testes_ARID4B: |
| 1_Testes_ARID4B: | -711 upstream                             | 1 | 17.000 | 1 | 1_Testes_ARID4B: |
| 1_Testes_ARID4B: | 4961, 6769 downstream, downstre           | 1 | 22.000 | 2 | 1_Testes_ARID4B: |

|                                     |                         |   |        |   |                  |
|-------------------------------------|-------------------------|---|--------|---|------------------|
| 1_Testes_ARID4B: -319, 1489, 12961  | upstream, in gene, dow  | 1 | 30.333 | 3 | 1_Testes_ARID4B: |
| 1_Testes_ARID4B: 13074, 11266, -206 | downstream, downstre    | 1 | 30.333 | 3 | 1_Testes_ARID4B: |
| 1_Testes_ARID4B:                    | 137 in gene             | 1 | 47.000 | 1 | 1_Testes_ARID4B: |
| 1_Testes_ARID4B:                    | -3012 upstream          | 1 | 47.000 | 1 | 1_Testes_ARID4B: |
| 1_Testes_ARID4B:                    | 7608 downstream         | 1 | 47.000 | 1 | 1_Testes_ARID4B: |
| 1_Testes_ARID4B:                    | -2209 upstream          | 1 | 23.000 | 1 | 1_Testes_ARID4B: |
| 1_Testes_ARID4B: 1813, 14517, 30165 | in gene, in gene, downs | 1 | 22.000 | 3 | 1_Testes_ARID4B: |
| 1_Testes_ARID4B: 15852, 204         | downstream, in gene     | 1 | 21.500 | 2 | 1_Testes_ARID4B: |
| 1_Testes_ARID4B: 10635, -5941       | downstream, upstream    | 1 | 25.000 | 2 | 1_Testes_ARID4B: |
| 1_Testes_ARID4B:                    | 101 in gene             | 1 | 29.000 | 1 | 1_Testes_ARID4B: |
| 1_Testes_ARID4B: 35993, -6663       | downstream, upstream    | 1 | 27.000 | 2 | 1_Testes_ARID4B: |
| 1_Testes_ARID4B:                    | 504 in gene             | 1 | 25.000 | 1 | 1_Testes_ARID4B: |
| 1_Testes_ARID4B:                    | 19123 in gene           | 1 | 23.000 | 1 | 1_Testes_ARID4B: |
| 1_Testes_ARID4B:                    | 5234 downstream         | 1 | 23.000 | 1 | 1_Testes_ARID4B: |
| 1_Testes_ARID4B:                    | -3586 upstream          | 1 | 29.000 | 1 | 1_Testes_ARID4B: |
| 1_Testes_ARID4B:                    | 176 in gene             | 1 | 29.000 | 1 | 1_Testes_ARID4B: |
| 1_Testes_ARID4B:                    | 646 in gene             | 1 | 18.000 | 1 | 1_Testes_ARID4B: |
| 1_Testes_ARID4B:                    | -140 upstream           | 1 | 29.000 | 1 | 1_Testes_ARID4B: |
| 1_Testes_ARID4B:                    | -73 upstream            | 1 | 29.000 | 1 | 1_Testes_ARID4B: |
| 1_Testes_ARID4B:                    | 13712 downstream        | 1 | 33.000 | 1 | 1_Testes_ARID4B: |
| 1_Testes_ARID4B:                    | 372 in gene             | 1 | 33.000 | 1 | 1_Testes_ARID4B: |
| 1_Testes_ARID4B:                    | 106 in gene             | 1 | 32.000 | 1 | 1_Testes_ARID4B: |
| 1_Testes_ARID4B: 38694, 118         | downstream, in gene     | 1 | 26.000 | 2 | 1_Testes_ARID4B: |
| 1_Testes_ARID4B:                    | 17511 downstream        | 1 | 20.000 | 1 | 1_Testes_ARID4B: |
| 1_Testes_ARID4B:                    | 222 in gene             | 1 | 31.000 | 1 | 1_Testes_ARID4B: |
| 1_Testes_ARID4B:                    | 208 in gene             | 1 | 34.000 | 1 | 1_Testes_ARID4B: |
| 1_Testes_ARID4B:                    | -207 upstream           | 1 | 32.000 | 1 | 1_Testes_ARID4B: |
| 1_Testes_ARID4B:                    | 608 in gene             | 1 | 32.000 | 1 | 1_Testes_ARID4B: |
| 1_Testes_ARID4B:                    | 287199 in gene          | 1 | 44.000 | 1 | 1_Testes_ARID4B: |
| 1_Testes_ARID4B:                    | 19566 downstream        | 1 | 24.000 | 1 | 1_Testes_ARID4B: |
| 1_Testes_ARID4B:                    | 314 in gene             | 1 | 24.000 | 1 | 1_Testes_ARID4B: |
| 1_Testes_ARID4B:                    | 254 in gene             | 1 | 20.000 | 1 | 1_Testes_ARID4B: |
| 1_Testes_ARID4B:                    | 285 in gene             | 1 | 27.000 | 1 | 1_Testes_ARID4B: |
| 1_Testes_ARID4B:                    | -323 upstream           | 1 | 27.000 | 1 | 1_Testes_ARID4B: |
| 1_Testes_ARID4B:                    | 505 in gene             | 1 | 20.000 | 1 | 1_Testes_ARID4B: |
| 1_Testes_ARID4B:                    | 102 in gene             | 1 | 21.000 | 1 | 1_Testes_ARID4B: |
| 1_Testes_ARID4B:                    | 466 in gene             | 1 | 34.000 | 1 | 1_Testes_ARID4B: |
| 1_Testes_ARID4B:                    | 235 in gene             | 1 | 20.000 | 1 | 1_Testes_ARID4B: |
| 1_Testes_ARID4B:                    | 158 in gene             | 1 | 21.000 | 1 | 1_Testes_ARID4B: |
| 1_Testes_ARID4B:                    | 419 in gene             | 1 | 40.000 | 1 | 1_Testes_ARID4B: |
| 1_Testes_ARID4B: 283728, 336        | in gene, in gene        | 1 | 21.500 | 2 | 1_Testes_ARID4B: |
| 1_Testes_ARID4B:                    | 240 in gene             | 1 | 24.000 | 1 | 1_Testes_ARID4B: |
| 1_Testes_ARID4B:                    | -9306 upstream          | 1 | 25.000 | 1 | 1_Testes_ARID4B: |
| 1_Testes_ARID4B: 262, 48638         | in gene, downstream     | 1 | 21.000 | 2 | 1_Testes_ARID4B: |
| 1_Testes_ARID4B:                    | 119 in gene             | 1 | 17.000 | 1 | 1_Testes_ARID4B: |
| 1_Testes_ARID4B:                    | 198504 downstream       | 1 | 32.000 | 1 | 1_Testes_ARID4B: |
| 1_Testes_ARID4B: 304, 19408         | in gene, downstream     | 1 | 40.500 | 2 | 1_Testes_ARID4B: |



|                                         |                          |   |        |   |                  |
|-----------------------------------------|--------------------------|---|--------|---|------------------|
| 1_Testes_ARID4B:                        | 95 in gene               | 1 | 49.000 | 1 | 1_Testes_ARID4B: |
| 1_Testes_ARID4B:                        | -395 upstream            | 1 | 30.000 | 1 | 1_Testes_ARID4B: |
| 1_Testes_ARID4B:                        | 53 in gene               | 1 | 23.000 | 1 | 1_Testes_ARID4B: |
| 1_Testes_ARID4B: 39189, 117             | downstream, in gene      | 1 | 22.500 | 2 | 1_Testes_ARID4B: |
| 1_Testes_ARID4B:                        | 372 in gene              | 1 | 29.000 | 1 | 1_Testes_ARID4B: |
| 1_Testes_ARID4B: 634, -422              | in gene, upstream        | 1 | 27.500 | 2 | 1_Testes_ARID4B: |
| 1_Testes_ARID4B:                        | 622 in gene              | 1 | 39.000 | 1 | 1_Testes_ARID4B: |
| 1_Testes_ARID4B: -1121, 159             | upstream, in gene        | 1 | 29.500 | 2 | 1_Testes_ARID4B: |
| 1_Testes_ARID4B:                        | 214 in gene              | 1 | 30.000 | 1 | 1_Testes_ARID4B: |
| 1_Testes_ARID4B: 20538, 16442, 8682, 67 | downstream, downstre     | 1 | 22.200 | 5 | 1_Testes_ARID4B: |
| 1_Testes_ARID4B: -7319, -5351, -3239    | upstream, upstream, u    | 1 | 24.667 | 3 | 1_Testes_ARID4B: |
| 1_Testes_ARID4B:                        | -2 upstream              | 1 | 23.000 | 1 | 1_Testes_ARID4B: |
| 1_Testes_ARID4B: 256, 15904             | in gene, in gene         | 1 | 21.500 | 2 | 1_Testes_ARID4B: |
| 1_Testes_ARID4B:                        | 571 in gene              | 1 | 30.000 | 1 | 1_Testes_ARID4B: |
| 1_Testes_ARID4B:                        | -273 upstream            | 1 | 23.000 | 1 | 1_Testes_ARID4B: |
| 1_Testes_ARID4B:                        | 445 in gene              | 1 | 28.000 | 1 | 1_Testes_ARID4B: |
| 1_Testes_ARID4B:                        | 658 in gene              | 1 | 21.000 | 1 | 1_Testes_ARID4B: |
| 1_Testes_ARID4B:                        | 332 in gene              | 1 | 24.000 | 1 | 1_Testes_ARID4B: |
| 1_Testes_ARID4B:                        | 82 in gene               | 1 | 24.000 | 1 | 1_Testes_ARID4B: |
| 1_Testes_ARID4B:                        | 7883 downstream          | 1 | 27.000 | 1 | 1_Testes_ARID4B: |
| 1_Testes_ARID4B:                        | 233 in gene              | 1 | 27.000 | 1 | 1_Testes_ARID4B: |
| 1_Testes_ARID4B:                        | 206 in gene              | 1 | 28.000 | 1 | 1_Testes_ARID4B: |
| 1_Testes_ARID4B:                        | 1057 in gene             | 1 | 25.000 | 1 | 1_Testes_ARID4B: |
| 1_Testes_ARID4B:                        | -1193 upstream           | 1 | 25.000 | 1 | 1_Testes_ARID4B: |
| 1_Testes_ARID4B:                        | 460 in gene              | 1 | 33.000 | 1 | 1_Testes_ARID4B: |
| 1_Testes_ARID4B:                        | -1430 upstream           | 1 | 23.000 | 1 | 1_Testes_ARID4B: |
| 1_Testes_ARID4B:                        | 17160 downstream         | 1 | 23.000 | 1 | 1_Testes_ARID4B: |
| 1_Testes_ARID4B: 562, 2546, 57202       | in gene, in gene, in gen | 1 | 22.000 | 3 | 1_Testes_ARID4B: |
| 1_Testes_ARID4B:                        | -6759 upstream           | 1 | 22.000 | 1 | 1_Testes_ARID4B: |
| 1_Testes_ARID4B:                        | 150 in gene              | 1 | 41.000 | 1 | 1_Testes_ARID4B: |
| 1_Testes_ARID4B: 103, 11815, 45735      | in gene, in gene, downs  | 1 | 26.000 | 3 | 1_Testes_ARID4B: |
| 1_Testes_ARID4B:                        | 40 in gene               | 1 | 24.000 | 1 | 1_Testes_ARID4B: |
| 1_Testes_ARID4B:                        | -317 upstream            | 1 | 24.000 | 1 | 1_Testes_ARID4B: |
| 1_Testes_ARID4B:                        | 23608 downstream         | 1 | 26.000 | 1 | 1_Testes_ARID4B: |
| 1_Testes_ARID4B:                        | 8769 downstream          | 1 | 26.000 | 1 | 1_Testes_ARID4B: |
| 1_Testes_ARID4B: 329, 25097             | in gene, downstream      | 1 | 26.500 | 2 | 1_Testes_ARID4B: |
| 1_Testes_ARID4B:                        | 287 in gene              | 1 | 27.000 | 1 | 1_Testes_ARID4B: |
| 1_Testes_ARID4B:                        | -37 upstream             | 1 | 19.000 | 1 | 1_Testes_ARID4B: |
| 1_Testes_ARID4B:                        | -2881 upstream           | 1 | 19.000 | 1 | 1_Testes_ARID4B: |
| 1_Testes_ARID4B: 31119, 8351, 655       | downstream, in gene, i   | 1 | 20.000 | 3 | 1_Testes_ARID4B: |
| 1_Testes_ARID4B:                        | 17226 downstream         | 1 | 24.000 | 1 | 1_Testes_ARID4B: |
| 1_Testes_ARID4B: 3447, 2327             | in gene, in gene         | 1 | 22.000 | 2 | 1_Testes_ARID4B: |
| 1_Testes_ARID4B:                        | 717 in gene              | 1 | 40.000 | 1 | 1_Testes_ARID4B: |
| 1_Testes_ARID4B:                        | 163 in gene              | 1 | 26.000 | 1 | 1_Testes_ARID4B: |
| 1_Testes_ARID4B: -956, 13892            | upstream, in gene        | 1 | 28.500 | 2 | 1_Testes_ARID4B: |
| 1_Testes_ARID4B:                        | -452 upstream            | 1 | 22.000 | 1 | 1_Testes_ARID4B: |
| 1_Testes_ARID4B: -524, 212              | upstream, in gene        | 1 | 24.500 | 2 | 1_Testes_ARID4B: |

|                               |                     |   |        |   |                  |
|-------------------------------|---------------------|---|--------|---|------------------|
| 1_Testes_ARID4B:              | 146 in gene         | 1 | 38.000 | 1 | 1_Testes_ARID4B: |
| 1_Testes_ARID4B: 109670, 1030 | downstream, in gene | 1 | 27.000 | 2 | 1_Testes_ARID4B: |
| 1_Testes_ARID4B:              | 40197 downstream    | 1 | 16.000 | 1 | 1_Testes_ARID4B: |
| 1_Testes_ARID4B:              | -4795 upstream      | 1 | 37.000 | 1 | 1_Testes_ARID4B: |
| 1_Testes_ARID4B:              | 484 in gene         | 1 | 37.000 | 1 | 1_Testes_ARID4B: |
| 1_Testes_ARID4B:              | 535 in gene         | 1 | 28.000 | 1 | 1_Testes_ARID4B: |
| 1_Testes_ARID4B:              | 343 in gene         | 1 | 35.000 | 1 | 1_Testes_ARID4B: |
| 1_Testes_ARID4B:              | 354 in gene         | 1 | 19.000 | 1 | 1_Testes_ARID4B: |
| 1_Testes_ARID4B:              | 475 in gene         | 1 | 21.000 | 1 | 1_Testes_ARID4B: |
| 1_Testes_ARID4B:              | 267 in gene         | 1 | 23.000 | 1 | 1_Testes_ARID4B: |
| 1_Testes_ARID4B:              | 80 in gene          | 1 | 27.000 | 1 | 1_Testes_ARID4B: |
| 1_Testes_ARID4B:              | -166 upstream       | 1 | 27.000 | 1 | 1_Testes_ARID4B: |
| 1_Testes_ARID4B:              | 16401 downstream    | 1 | 43.000 | 1 | 1_Testes_ARID4B: |
| 1_Testes_ARID4B:              | 667 in gene         | 1 | 43.000 | 1 | 1_Testes_ARID4B: |
| 1_Testes_ARID4B:              | 1429 in gene        | 1 | 49.000 | 1 | 1_Testes_ARID4B: |
| 1_Testes_ARID4B:              | -9088 upstream      | 1 | 49.000 | 1 | 1_Testes_ARID4B: |
| 1_Testes_ARID4B:              | 565 in gene         | 1 | 39.000 | 1 | 1_Testes_ARID4B: |
| 1_Testes_ARID4B:              | 230 in gene         | 1 | 16.000 | 1 | 1_Testes_ARID4B: |
| 1_Testes_ARID4B:              | 402 in gene         | 1 | 25.000 | 1 | 1_Testes_ARID4B: |
| 1_Testes_ARID4B:              | -720 upstream       | 1 | 21.000 | 1 | 1_Testes_ARID4B: |
| 1_Testes_ARID4B:              | 424 in gene         | 1 | 21.000 | 1 | 1_Testes_ARID4B: |
| 1_Testes_ARID4B:              | 1059 in gene        | 1 | 33.000 | 1 | 1_Testes_ARID4B: |
| 1_Testes_ARID4B:              | 13368 downstream    | 1 | 33.000 | 1 | 1_Testes_ARID4B: |
| 1_Testes_ARID4B:              | 161 in gene         | 1 | 28.000 | 1 | 1_Testes_ARID4B: |
| 1_Testes_ARID4B: 32931, 296   | downstream, in gene | 1 | 26.000 | 2 | 1_Testes_ARID4B: |
| 1_Testes_ARID4B:              | 809 in gene         | 1 | 21.000 | 1 | 1_Testes_ARID4B: |
| 1_Testes_ARID4B:              | -285 upstream       | 1 | 29.000 | 1 | 1_Testes_ARID4B: |
| 1_Testes_ARID4B:              | 457 in gene         | 1 | 22.000 | 1 | 1_Testes_ARID4B: |
| 1_Testes_ARID4B:              | 204 in gene         | 1 | 23.000 | 1 | 1_Testes_ARID4B: |
| 1_Testes_ARID4B:              | -6563 upstream      | 1 | 23.000 | 1 | 1_Testes_ARID4B: |
| 1_Testes_ARID4B:              | -967 upstream       | 1 | 31.000 | 1 | 1_Testes_ARID4B: |
| 1_Testes_ARID4B: 568, 116861  | in gene, downstream | 1 | 26.000 | 2 | 1_Testes_ARID4B: |
| 1_Testes_ARID4B:              | -136 upstream       | 1 | 21.000 | 1 | 1_Testes_ARID4B: |
| 1_Testes_ARID4B:              | 100 in gene         | 1 | 21.000 | 1 | 1_Testes_ARID4B: |
| 1_Testes_ARID4B:              | 8197 in gene        | 1 | 19.000 | 1 | 1_Testes_ARID4B: |
| 1_Testes_ARID4B: 66897, 177   | downstream, in gene | 1 | 20.000 | 2 | 1_Testes_ARID4B: |
| 1_Testes_ARID4B:              | 822 in gene         | 1 | 21.000 | 1 | 1_Testes_ARID4B: |
| 1_Testes_ARID4B:              | 119 in gene         | 1 | 29.000 | 1 | 1_Testes_ARID4B: |
| 1_Testes_ARID4B:              | 1200 in gene        | 1 | 20.000 | 1 | 1_Testes_ARID4B: |
| 1_Testes_ARID4B:              | 4258 in gene        | 1 | 19.000 | 1 | 1_Testes_ARID4B: |
| 1_Testes_ARID4B:              | 601 in gene         | 1 | 29.000 | 1 | 1_Testes_ARID4B: |
| 1_Testes_ARID4B:              | -3565 upstream      | 1 | 18.000 | 1 | 1_Testes_ARID4B: |
| 1_Testes_ARID4B:              | 216 in gene         | 1 | 34.000 | 1 | 1_Testes_ARID4B: |
| 1_Testes_ARID4B:              | 313 in gene         | 1 | 23.000 | 1 | 1_Testes_ARID4B: |
| 1_Testes_ARID4B:              | 78825 downstream    | 1 | 23.000 | 1 | 1_Testes_ARID4B: |
| 1_Testes_ARID4B: 6967, 183    | in gene, in gene    | 1 | 22.500 | 2 | 1_Testes_ARID4B: |
| 1_Testes_ARID4B: 51, 86723    | in gene, downstream | 1 | 27.000 | 2 | 1_Testes_ARID4B: |

|                                      |                      |   |        |   |                  |
|--------------------------------------|----------------------|---|--------|---|------------------|
| 1_Testes_ARID4B: 2268, 17532         | in gene, downstream  | 1 | 28.000 | 2 | 1_Testes_ARID4B: |
| 1_Testes_ARID4B: 15437, 173          | downstream, in gene  | 1 | 28.000 | 2 | 1_Testes_ARID4B: |
| 1_Testes_ARID4B:                     | -3829 upstream       | 1 | 27.000 | 1 | 1_Testes_ARID4B: |
| 1_Testes_ARID4B:                     | -604 upstream        | 1 | 27.000 | 1 | 1_Testes_ARID4B: |
| 1_Testes_ARID4B:                     | 799 in gene          | 1 | 27.000 | 1 | 1_Testes_ARID4B: |
| 1_Testes_ARID4B:                     | 138 in gene          | 1 | 20.000 | 1 | 1_Testes_ARID4B: |
| 1_Testes_ARID4B:                     | 348 in gene          | 1 | 30.000 | 1 | 1_Testes_ARID4B: |
| 1_Testes_ARID4B:                     | 243 in gene          | 1 | 37.000 | 1 | 1_Testes_ARID4B: |
| 1_Testes_ARID4B:                     | 58105 downstream     | 1 | 20.000 | 1 | 1_Testes_ARID4B: |
| 1_Testes_ARID4B:                     | 192 in gene          | 1 | 20.000 | 1 | 1_Testes_ARID4B: |
| 1_Testes_ARID4B:                     | 3679 in gene         | 1 | 21.000 | 1 | 1_Testes_ARID4B: |
| 1_Testes_ARID4B:                     | 17791 downstream     | 1 | 21.000 | 1 | 1_Testes_ARID4B: |
| 1_Testes_ARID4B:                     | 92 in gene           | 1 | 47.000 | 1 | 1_Testes_ARID4B: |
| 1_Testes_ARID4B:                     | 318 in gene          | 1 | 47.000 | 1 | 1_Testes_ARID4B: |
| 1_Testes_ARID4B:                     | 165 in gene          | 1 | 25.000 | 1 | 1_Testes_ARID4B: |
| 1_Testes_ARID4B: 68913, 3361         | downstream, in gene  | 1 | 32.500 | 2 | 1_Testes_ARID4B: |
| 1_Testes_ARID4B:                     | 35566 downstream     | 1 | 40.000 | 1 | 1_Testes_ARID4B: |
| 1_Testes_ARID4B:                     | 185 in gene          | 1 | 25.000 | 1 | 1_Testes_ARID4B: |
| 1_Testes_ARID4B:                     | 200 in gene          | 1 | 20.000 | 1 | 1_Testes_ARID4B: |
| 1_Testes_ARID4B: 1586, 274           | in gene, in gene     | 1 | 33.000 | 2 | 1_Testes_ARID4B: |
| 1_Testes_ARID4B: 8691, 7379          | downstream, downstre | 1 | 33.000 | 2 | 1_Testes_ARID4B: |
| 1_Testes_ARID4B:                     | 429 in gene          | 1 | 31.000 | 1 | 1_Testes_ARID4B: |
| 1_Testes_ARID4B:                     | 104 in gene          | 1 | 32.000 | 1 | 1_Testes_ARID4B: |
| 1_Testes_ARID4B: 214, -442           | in gene, upstream    | 1 | 19.000 | 2 | 1_Testes_ARID4B: |
| 1_Testes_ARID4B:                     | -344 upstream        | 1 | 19.000 | 1 | 1_Testes_ARID4B: |
| 1_Testes_ARID4B:                     | 229 in gene          | 1 | 20.000 | 1 | 1_Testes_ARID4B: |
| 1_Testes_ARID4B:                     | 18692 downstream     | 1 | 20.000 | 1 | 1_Testes_ARID4B: |
| 1_Testes_ARID4B:                     | 10628 downstream     | 1 | 15.000 | 1 | 1_Testes_ARID4B: |
| 1_Testes_ARID4B: 1033, -6551         | in gene, upstream    | 1 | 22.500 | 2 | 1_Testes_ARID4B: |
| 1_Testes_ARID4B: -238, 7346          | upstream, downstream | 1 | 22.500 | 2 | 1_Testes_ARID4B: |
| 1_Testes_ARID4B: 7986, 402           | downstream, in gene  | 1 | 22.500 | 2 | 1_Testes_ARID4B: |
| 1_Testes_ARID4B: 15855, 8271, -10513 | downstream, downstre | 1 | 23.000 | 3 | 1_Testes_ARID4B: |
| 1_Testes_ARID4B: 43614, 24830        | downstream, in gene  | 1 | 24.500 | 2 | 1_Testes_ARID4B: |
| 1_Testes_ARID4B:                     | 255 in gene          | 1 | 38.000 | 1 | 1_Testes_ARID4B: |
| 1_Testes_ARID4B:                     | -4418 upstream       | 1 | 21.000 | 1 | 1_Testes_ARID4B: |
| 1_Testes_ARID4B:                     | 161 in gene          | 1 | 21.000 | 1 | 1_Testes_ARID4B: |
| 1_Testes_ARID4B:                     | 141 in gene          | 1 | 18.000 | 1 | 1_Testes_ARID4B: |
| 1_Testes_ARID4B:                     | 294 in gene          | 1 | 18.000 | 1 | 1_Testes_ARID4B: |
| 1_Testes_ARID4B:                     | 69222 downstream     | 1 | 18.000 | 1 | 1_Testes_ARID4B: |
| 1_Testes_ARID4B:                     | 229 in gene          | 1 | 39.000 | 1 | 1_Testes_ARID4B: |
| 1_Testes_ARID4B:                     | -708 upstream        | 1 | 39.000 | 1 | 1_Testes_ARID4B: |
| 1_Testes_ARID4B:                     | 97723 downstream     | 1 | 39.000 | 1 | 1_Testes_ARID4B: |
| 1_Testes_ARID4B:                     | -73 upstream         | 1 | 26.000 | 1 | 1_Testes_ARID4B: |
| 1_Testes_ARID4B:                     | 16 in gene           | 1 | 26.000 | 1 | 1_Testes_ARID4B: |
| 1_Testes_ARID4B:                     | 29209 downstream     | 1 | 26.000 | 1 | 1_Testes_ARID4B: |
| 1_Testes_ARID4B:                     | 167 in gene          | 1 | 39.000 | 1 | 1_Testes_ARID4B: |
| 1_Testes_ARID4B:                     | 165 in gene          | 1 | 48.000 | 1 | 1_Testes_ARID4B: |

|                              |                     |   |        |   |                  |
|------------------------------|---------------------|---|--------|---|------------------|
| 1_Testes_ARID4B:             | 121 in gene         | 1 | 22.000 | 1 | 1_Testes_ARID4B: |
| 1_Testes_ARID4B:             | -3964 upstream      | 1 | 20.000 | 1 | 1_Testes_ARID4B: |
| 1_Testes_ARID4B:             | 93 in gene          | 1 | 32.000 | 1 | 1_Testes_ARID4B: |
| 1_Testes_ARID4B:             | 18665 downstream    | 1 | 32.000 | 1 | 1_Testes_ARID4B: |
| 1_Testes_ARID4B:             | -23 upstream        | 1 | 24.000 | 1 | 1_Testes_ARID4B: |
| 1_Testes_ARID4B:             | 534 in gene         | 1 | 31.000 | 1 | 1_Testes_ARID4B: |
| 1_Testes_ARID4B:             | -368 upstream       | 1 | 29.000 | 1 | 1_Testes_ARID4B: |
| 1_Testes_ARID4B:             | 270 in gene         | 1 | 29.000 | 1 | 1_Testes_ARID4B: |
| 1_Testes_ARID4B:             | 660 in gene         | 1 | 21.000 | 1 | 1_Testes_ARID4B: |
| 1_Testes_ARID4B:             | 454 in gene         | 1 | 19.000 | 1 | 1_Testes_ARID4B: |
| 1_Testes_ARID4B: 1041, 305   | in gene, in gene    | 1 | 28.500 | 2 | 1_Testes_ARID4B: |
| 1_Testes_ARID4B: -280, 456   | upstream, in gene   | 1 | 28.500 | 2 | 1_Testes_ARID4B: |
| 1_Testes_ARID4B:             | -453 upstream       | 1 | 28.000 | 1 | 1_Testes_ARID4B: |
| 1_Testes_ARID4B:             | 58 in gene          | 1 | 28.000 | 1 | 1_Testes_ARID4B: |
| 1_Testes_ARID4B:             | 101 in gene         | 1 | 27.000 | 1 | 1_Testes_ARID4B: |
| 1_Testes_ARID4B:             | 184 in gene         | 1 | 28.000 | 1 | 1_Testes_ARID4B: |
| 1_Testes_ARID4B: 21620, 116  | downstream, in gene | 1 | 22.500 | 2 | 1_Testes_ARID4B: |
| 1_Testes_ARID4B:             | -1031 upstream      | 1 | 23.000 | 1 | 1_Testes_ARID4B: |
| 1_Testes_ARID4B:             | 938 in gene         | 1 | 23.000 | 1 | 1_Testes_ARID4B: |
| 1_Testes_ARID4B:             | 194 in gene         | 1 | 34.000 | 1 | 1_Testes_ARID4B: |
| 1_Testes_ARID4B:             | 371 in gene         | 1 | 41.000 | 1 | 1_Testes_ARID4B: |
| 1_Testes_ARID4B: 13849, 313  | downstream, in gene | 1 | 34.500 | 2 | 1_Testes_ARID4B: |
| 1_Testes_ARID4B: 114325, 213 | downstream, in gene | 1 | 28.500 | 2 | 1_Testes_ARID4B: |
| 1_Testes_ARID4B:             | -483 upstream       | 1 | 29.000 | 1 | 1_Testes_ARID4B: |
| 1_Testes_ARID4B:             | -4352 upstream      | 1 | 25.000 | 1 | 1_Testes_ARID4B: |
| 1_Testes_ARID4B:             | 807 in gene         | 1 | 24.000 | 1 | 1_Testes_ARID4B: |
| 1_Testes_ARID4B:             | 130 in gene         | 1 | 25.000 | 1 | 1_Testes_ARID4B: |
| 1_Testes_ARID4B:             | -7003 upstream      | 1 | 25.000 | 1 | 1_Testes_ARID4B: |
| 1_Testes_ARID4B:             | 174 in gene         | 1 | 30.000 | 1 | 1_Testes_ARID4B: |
| 1_Testes_ARID4B:             | 49 in gene          | 1 | 30.000 | 1 | 1_Testes_ARID4B: |
| 1_Testes_ARID4B:             | 235 in gene         | 1 | 27.000 | 1 | 1_Testes_ARID4B: |
| 1_Testes_ARID4B:             | -575 upstream       | 1 | 22.000 | 1 | 1_Testes_ARID4B: |
| 1_Testes_ARID4B:             | 28 in gene          | 1 | 22.000 | 1 | 1_Testes_ARID4B: |
| 1_Testes_ARID4B:             | 235 in gene         | 1 | 23.000 | 1 | 1_Testes_ARID4B: |
| 1_Testes_ARID4B:             | 23443 downstream    | 1 | 17.000 | 1 | 1_Testes_ARID4B: |
| 1_Testes_ARID4B: -7023, 321  | upstream, in gene   | 1 | 22.000 | 2 | 1_Testes_ARID4B: |
| 1_Testes_ARID4B:             | 464 in gene         | 1 | 35.000 | 1 | 1_Testes_ARID4B: |
| 1_Testes_ARID4B:             | 168 in gene         | 1 | 21.000 | 1 | 1_Testes_ARID4B: |
| 1_Testes_ARID4B:             | -365 upstream       | 1 | 21.000 | 1 | 1_Testes_ARID4B: |
| 1_Testes_ARID4B:             | 371 in gene         | 1 | 26.000 | 1 | 1_Testes_ARID4B: |
| 1_Testes_ARID4B:             | -139 upstream       | 1 | 36.000 | 1 | 1_Testes_ARID4B: |
| 1_Testes_ARID4B:             | 61 in gene          | 1 | 45.000 | 1 | 1_Testes_ARID4B: |
| 1_Testes_ARID4B:             | 39566 downstream    | 1 | 45.000 | 1 | 1_Testes_ARID4B: |
| 1_Testes_ARID4B:             | -425 upstream       | 1 | 33.000 | 1 | 1_Testes_ARID4B: |
| 1_Testes_ARID4B:             | 290 in gene         | 1 | 33.000 | 1 | 1_Testes_ARID4B: |
| 1_Testes_ARID4B:             | -222 upstream       | 1 | 29.000 | 1 | 1_Testes_ARID4B: |
| 1_Testes_ARID4B: 127, 26543  | in gene, downstream | 1 | 23.500 | 2 | 1_Testes_ARID4B: |

|                                          |                         |   |        |   |                  |
|------------------------------------------|-------------------------|---|--------|---|------------------|
| 1_Testes_ARID4B:                         | 147 in gene             | 1 | 18.000 | 1 | 1_Testes_ARID4B: |
| 1_Testes_ARID4B:                         | 379 in gene             | 1 | 19.000 | 1 | 1_Testes_ARID4B: |
| 1_Testes_ARID4B:                         | 235 in gene             | 1 | 29.000 | 1 | 1_Testes_ARID4B: |
| 1_Testes_ARID4B:                         | -340 upstream           | 1 | 29.000 | 1 | 1_Testes_ARID4B: |
| 1_Testes_ARID4B:                         | 403 in gene             | 1 | 33.000 | 1 | 1_Testes_ARID4B: |
| 1_Testes_ARID4B:                         | 8 in gene               | 1 | 27.000 | 1 | 1_Testes_ARID4B: |
| 1_Testes_ARID4B:                         | -196 upstream           | 1 | 27.000 | 1 | 1_Testes_ARID4B: |
| 1_Testes_ARID4B:                         | 363 in gene             | 1 | 24.000 | 1 | 1_Testes_ARID4B: |
| 1_Testes_ARID4B:                         | 72 in gene              | 1 | 33.000 | 1 | 1_Testes_ARID4B: |
| 1_Testes_ARID4B:                         | 181 in gene             | 1 | 24.000 | 1 | 1_Testes_ARID4B: |
| 1_Testes_ARID4B:                         | 1 in gene               | 1 | 25.000 | 1 | 1_Testes_ARID4B: |
| 1_Testes_ARID4B:                         | 5861 downstream         | 1 | 17.000 | 1 | 1_Testes_ARID4B: |
| 1_Testes_ARID4B: 10086, 459              | in gene, in gene        | 1 | 22.000 | 2 | 1_Testes_ARID4B: |
| 1_Testes_ARID4B:                         | 158 in gene             | 1 | 19.000 | 1 | 1_Testes_ARID4B: |
| 1_Testes_ARID4B:                         | 18072 downstream        | 1 | 19.000 | 1 | 1_Testes_ARID4B: |
| 1_Testes_ARID4B:                         | 18 in gene              | 1 | 21.000 | 1 | 1_Testes_ARID4B: |
| 1_Testes_ARID4B:                         | -235 upstream           | 1 | 21.000 | 1 | 1_Testes_ARID4B: |
| 1_Testes_ARID4B:                         | 8989 downstream         | 1 | 21.000 | 1 | 1_Testes_ARID4B: |
| 1_Testes_ARID4B:                         | 166 in gene             | 1 | 21.000 | 1 | 1_Testes_ARID4B: |
| 1_Testes_ARID4B: -6622, 10610            | upstream, downstream    | 1 | 22.500 | 2 | 1_Testes_ARID4B: |
| 1_Testes_ARID4B:                         | 49 in gene              | 1 | 24.000 | 1 | 1_Testes_ARID4B: |
| 1_Testes_ARID4B: -4459, 10645            | upstream, downstream    | 1 | 23.500 | 2 | 1_Testes_ARID4B: |
| 1_Testes_ARID4B: 15447, 343, -6537       | downstream, in gene, u  | 1 | 26.000 | 3 | 1_Testes_ARID4B: |
| 1_Testes_ARID4B: 8319, 1439              | downstream, in gene     | 1 | 27.000 | 2 | 1_Testes_ARID4B: |
| 1_Testes_ARID4B: 337, 19729, 21105       | in gene, downstream, c  | 1 | 22.333 | 3 | 1_Testes_ARID4B: |
| 1_Testes_ARID4B: 973, -403               | in gene, upstream       | 1 | 21.000 | 2 | 1_Testes_ARID4B: |
| 1_Testes_ARID4B: -1927, -551, 26105      | upstream, upstream, d   | 1 | 20.667 | 3 | 1_Testes_ARID4B: |
| 1_Testes_ARID4B:                         | -807 upstream           | 1 | 20.000 | 1 | 1_Testes_ARID4B: |
| 1_Testes_ARID4B:                         | 726 in gene             | 1 | 20.000 | 1 | 1_Testes_ARID4B: |
| 1_Testes_ARID4B: 37954, -2142, -8590, -1 | downstream, upstream    | 1 | 27.500 | 4 | 1_Testes_ARID4B: |
| 1_Testes_ARID4B: 616, -5832, -8072       | in gene, upstream, upst | 1 | 30.000 | 3 | 1_Testes_ARID4B: |
| 1_Testes_ARID4B: 4475, -1973, -4213      | downstream, upstream    | 1 | 30.000 | 3 | 1_Testes_ARID4B: |
| 1_Testes_ARID4B: 9743, 3295, 1055        | downstream, in gene, i  | 1 | 30.000 | 3 | 1_Testes_ARID4B: |
| 1_Testes_ARID4B: 19236, 16996, 164       | downstream, downstre    | 1 | 35.667 | 3 | 1_Testes_ARID4B: |
| 1_Testes_ARID4B:                         | 9721 downstream         | 1 | 37.000 | 1 | 1_Testes_ARID4B: |
| 1_Testes_ARID4B:                         | 372 in gene             | 1 | 22.000 | 1 | 1_Testes_ARID4B: |
| 1_Testes_ARID4B:                         | -3512 upstream          | 1 | 22.000 | 1 | 1_Testes_ARID4B: |
| 1_Testes_ARID4B:                         | 10349 downstream        | 1 | 22.000 | 1 | 1_Testes_ARID4B: |
| 1_Testes_ARID4B:                         | -118 upstream           | 1 | 38.000 | 1 | 1_Testes_ARID4B: |
| 1_Testes_ARID4B: -195, 11229             | upstream, downstream    | 1 | 31.000 | 2 | 1_Testes_ARID4B: |
| 1_Testes_ARID4B:                         | 146 in gene             | 1 | 24.000 | 1 | 1_Testes_ARID4B: |
| 1_Testes_ARID4B:                         | 203 in gene             | 1 | 27.000 | 1 | 1_Testes_ARID4B: |
| 1_Testes_ARID4B:                         | 49724 downstream        | 1 | 28.000 | 1 | 1_Testes_ARID4B: |
| 1_Testes_ARID4B:                         | -670 upstream           | 1 | 28.000 | 1 | 1_Testes_ARID4B: |
| 1_Testes_ARID4B:                         | 166 in gene             | 1 | 33.000 | 1 | 1_Testes_ARID4B: |
| 1_Testes_ARID4B:                         | 178 in gene             | 1 | 21.000 | 1 | 1_Testes_ARID4B: |
| 1_Testes_ARID4B:                         | 229 in gene             | 1 | 32.000 | 1 | 1_Testes_ARID4B: |

|                                |                     |   |        |   |                  |
|--------------------------------|---------------------|---|--------|---|------------------|
| 1_Testes_ARID4B:               | 657 in gene         | 1 | 32.000 | 1 | 1_Testes_ARID4B: |
| 1_Testes_ARID4B:               | 22310 downstream    | 1 | 19.000 | 1 | 1_Testes_ARID4B: |
| 1_Testes_ARID4B: -6563, -10211 | upstream, upstream  | 1 | 22.000 | 2 | 1_Testes_ARID4B: |
| 1_Testes_ARID4B: 3425, -223    | in gene, upstream   | 1 | 22.000 | 2 | 1_Testes_ARID4B: |
| 1_Testes_ARID4B:               | 286 in gene         | 1 | 27.000 | 1 | 1_Testes_ARID4B: |
| 1_Testes_ARID4B:               | -7 upstream         | 1 | 27.000 | 1 | 1_Testes_ARID4B: |
| 1_Testes_ARID4B:               | -4256 upstream      | 1 | 27.000 | 1 | 1_Testes_ARID4B: |
| 1_Testes_ARID4B:               | 17136 downstream    | 1 | 27.000 | 1 | 1_Testes_ARID4B: |
| 1_Testes_ARID4B: 1497, 30377   | in gene, downstream | 1 | 25.500 | 2 | 1_Testes_ARID4B: |
| 1_Testes_ARID4B:               | 7337 downstream     | 1 | 28.000 | 1 | 1_Testes_ARID4B: |
| 1_Testes_ARID4B:               | -237 upstream       | 1 | 28.000 | 1 | 1_Testes_ARID4B: |
| 1_Testes_ARID4B:               | 288 in gene         | 1 | 31.000 | 1 | 1_Testes_ARID4B: |
| 1_Testes_ARID4B:               | 951 in gene         | 1 | 30.000 | 1 | 1_Testes_ARID4B: |
| 1_Testes_ARID4B:               | -1829 upstream      | 1 | 30.000 | 1 | 1_Testes_ARID4B: |
| 1_Testes_ARID4B:               | 15098 downstream    | 1 | 30.000 | 1 | 1_Testes_ARID4B: |
| 1_Testes_ARID4B:               | 1925 in gene        | 1 | 20.000 | 1 | 1_Testes_ARID4B: |
| 1_Testes_ARID4B:               | 179 in gene         | 1 | 26.000 | 1 | 1_Testes_ARID4B: |
| 1_Testes_ARID4B:               | -9517 upstream      | 1 | 26.000 | 1 | 1_Testes_ARID4B: |
| 1_Testes_ARID4B:               | -164 upstream       | 1 | 21.000 | 1 | 1_Testes_ARID4B: |
| 1_Testes_ARID4B:               | 545 in gene         | 1 | 29.000 | 1 | 1_Testes_ARID4B: |
| 1_Testes_ARID4B: 333, -4691    | in gene, upstream   | 1 | 29.000 | 2 | 1_Testes_ARID4B: |
| 1_Testes_ARID4B: -4774, 250    | upstream, in gene   | 1 | 29.000 | 2 | 1_Testes_ARID4B: |
| 1_Testes_ARID4B:               | 1208 in gene        | 1 | 27.000 | 1 | 1_Testes_ARID4B: |
| 1_Testes_ARID4B:               | 41 in gene          | 1 | 35.000 | 1 | 1_Testes_ARID4B: |
| 1_Testes_ARID4B:               | 517 in gene         | 1 | 29.000 | 1 | 1_Testes_ARID4B: |
| 1_Testes_ARID4B: 68692, 115236 | in gene, in gene    | 1 | 22.500 | 2 | 1_Testes_ARID4B: |
| 1_Testes_ARID4B:               | -44 upstream        | 1 | 23.000 | 1 | 1_Testes_ARID4B: |
| 1_Testes_ARID4B:               | 458 in gene         | 1 | 23.000 | 1 | 1_Testes_ARID4B: |
| 1_Testes_ARID4B:               | 37 in gene          | 1 | 25.000 | 1 | 1_Testes_ARID4B: |
| 1_Testes_ARID4B: 138, -8598    | in gene, upstream   | 1 | 26.000 | 2 | 1_Testes_ARID4B: |
| 1_Testes_ARID4B: -8586, 150    | upstream, in gene   | 1 | 26.000 | 2 | 1_Testes_ARID4B: |
| 1_Testes_ARID4B:               | 254 in gene         | 1 | 28.000 | 1 | 1_Testes_ARID4B: |
| 1_Testes_ARID4B:               | -377 upstream       | 1 | 28.000 | 1 | 1_Testes_ARID4B: |
| 1_Testes_ARID4B:               | 6514 downstream     | 1 | 21.000 | 1 | 1_Testes_ARID4B: |
| 1_Testes_ARID4B:               | 185 in gene         | 1 | 21.000 | 1 | 1_Testes_ARID4B: |
| 1_Testes_ARID4B:               | 644 in gene         | 1 | 23.000 | 1 | 1_Testes_ARID4B: |
| 1_Testes_ARID4B:               | 291 in gene         | 1 | 23.000 | 1 | 1_Testes_ARID4B: |
| 1_Testes_ARID4B:               | -645 upstream       | 1 | 23.000 | 1 | 1_Testes_ARID4B: |
| 1_Testes_ARID4B:               | 1200 in gene        | 1 | 23.000 | 1 | 1_Testes_ARID4B: |
| 1_Testes_ARID4B:               | -500 upstream       | 1 | 30.000 | 1 | 1_Testes_ARID4B: |
| 1_Testes_ARID4B:               | 157 in gene         | 1 | 27.000 | 1 | 1_Testes_ARID4B: |
| 1_Testes_ARID4B: 755, -805     | in gene, upstream   | 1 | 26.000 | 2 | 1_Testes_ARID4B: |
| 1_Testes_ARID4B: -5523, -3963  | upstream, upstream  | 1 | 26.000 | 2 | 1_Testes_ARID4B: |
| 1_Testes_ARID4B:               | -299 upstream       | 1 | 24.000 | 1 | 1_Testes_ARID4B: |
| 1_Testes_ARID4B:               | 271 in gene         | 1 | 22.000 | 1 | 1_Testes_ARID4B: |
| 1_Testes_ARID4B:               | -309 upstream       | 1 | 22.000 | 1 | 1_Testes_ARID4B: |
| 1_Testes_ARID4B:               | 227 in gene         | 1 | 29.000 | 1 | 1_Testes_ARID4B: |

|                                        |                          |   |        |   |                  |
|----------------------------------------|--------------------------|---|--------|---|------------------|
| 1_Testes_ARID4B:                       | -315 upstream            | 1 | 29.000 | 1 | 1_Testes_ARID4B: |
| 1_Testes_ARID4B:                       | 65 in gene               | 1 | 25.000 | 1 | 1_Testes_ARID4B: |
| 1_Testes_ARID4B:                       | -9170 upstream           | 1 | 20.000 | 1 | 1_Testes_ARID4B: |
| 1_Testes_ARID4B:0, 141152              | in gene, in gene         | 1 | 21.000 | 2 | 1_Testes_ARID4B: |
| 1_Testes_ARID4B:                       | 267 in gene              | 1 | 39.000 | 1 | 1_Testes_ARID4B: |
| 1_Testes_ARID4B:                       | 1293 in gene             | 1 | 17.000 | 1 | 1_Testes_ARID4B: |
| 1_Testes_ARID4B:                       | 416 in gene              | 1 | 20.000 | 1 | 1_Testes_ARID4B: |
| 1_Testes_ARID4B:                       | -309 upstream            | 1 | 26.000 | 1 | 1_Testes_ARID4B: |
| 1_Testes_ARID4B:                       | 190 in gene              | 1 | 26.000 | 1 | 1_Testes_ARID4B: |
| 1_Testes_ARID4B:                       | 23585 downstream         | 1 | 25.000 | 1 | 1_Testes_ARID4B: |
| 1_Testes_ARID4B:                       | 191 in gene              | 1 | 25.000 | 1 | 1_Testes_ARID4B: |
| 1_Testes_ARID4B:                       | 34884 downstream         | 1 | 25.000 | 1 | 1_Testes_ARID4B: |
| 1_Testes_ARID4B:                       | -610 upstream            | 1 | 25.000 | 1 | 1_Testes_ARID4B: |
| 1_Testes_ARID4B:                       | 192299 downstream        | 1 | 21.000 | 1 | 1_Testes_ARID4B: |
| 1_Testes_ARID4B:                       | 1389 in gene             | 1 | 21.000 | 1 | 1_Testes_ARID4B: |
| 1_Testes_ARID4B:                       | 49496 downstream         | 1 | 23.000 | 1 | 1_Testes_ARID4B: |
| 1_Testes_ARID4B:                       | 336 in gene              | 1 | 23.000 | 1 | 1_Testes_ARID4B: |
| 1_Testes_ARID4B:                       | 94 in gene               | 1 | 29.000 | 1 | 1_Testes_ARID4B: |
| 1_Testes_ARID4B:                       | -135 upstream            | 1 | 29.000 | 1 | 1_Testes_ARID4B: |
| 1_Testes_ARID4B:                       | 12832 downstream         | 1 | 29.000 | 1 | 1_Testes_ARID4B: |
| 1_Testes_ARID4B:                       | 11947 downstream         | 1 | 21.000 | 1 | 1_Testes_ARID4B: |
| 1_Testes_ARID4B:                       | 68 in gene               | 1 | 21.000 | 1 | 1_Testes_ARID4B: |
| 1_Testes_ARID4B:                       | -11015 upstream          | 1 | 36.000 | 1 | 1_Testes_ARID4B: |
| 1_Testes_ARID4B:                       | 11139 downstream         | 1 | 36.000 | 1 | 1_Testes_ARID4B: |
| 1_Testes_ARID4B:                       | 8788 downstream          | 1 | 36.000 | 1 | 1_Testes_ARID4B: |
| 1_Testes_ARID4B:                       | -321 upstream            | 1 | 36.000 | 1 | 1_Testes_ARID4B: |
| 1_Testes_ARID4B:                       | -693 upstream            | 1 | 36.000 | 1 | 1_Testes_ARID4B: |
| 1_Testes_ARID4B:25605, 5               | downstream, in gene      | 1 | 30.500 | 2 | 1_Testes_ARID4B: |
| 1_Testes_ARID4B:                       | -90 upstream             | 1 | 25.000 | 1 | 1_Testes_ARID4B: |
| 1_Testes_ARID4B:1924, 324, -385        | in gene, in gene, upstre | 1 | 21.667 | 3 | 1_Testes_ARID4B: |
| 1_Testes_ARID4B:-2050, -450, 259, 2188 | upstream, upstream, in   | 1 | 23.750 | 4 | 1_Testes_ARID4B: |
| 1_Testes_ARID4B:                       | -1936 upstream           | 1 | 30.000 | 1 | 1_Testes_ARID4B: |
| 1_Testes_ARID4B:                       | 156 in gene              | 1 | 30.000 | 1 | 1_Testes_ARID4B: |
| 1_Testes_ARID4B:                       | 5477 downstream          | 1 | 30.000 | 1 | 1_Testes_ARID4B: |
| 1_Testes_ARID4B:                       | -8052 upstream           | 1 | 24.000 | 1 | 1_Testes_ARID4B: |
| 1_Testes_ARID4B:402, -9822             | in gene, upstream        | 1 | 31.000 | 2 | 1_Testes_ARID4B: |
| 1_Testes_ARID4B:5883, -4341            | downstream, upstream     | 1 | 31.000 | 2 | 1_Testes_ARID4B: |
| 1_Testes_ARID4B:-10178, 46, 7726       | upstream, in gene, dow   | 1 | 31.667 | 3 | 1_Testes_ARID4B: |
| 1_Testes_ARID4B:-1107, 6573            | upstream, downstream     | 1 | 35.500 | 2 | 1_Testes_ARID4B: |
| 1_Testes_ARID4B:-7492, 188, 12284      | upstream, in gene, dow   | 1 | 30.333 | 3 | 1_Testes_ARID4B: |
| 1_Testes_ARID4B:-5718, 6378, 14490     | upstream, downstream     | 1 | 32.333 | 3 | 1_Testes_ARID4B: |
| 1_Testes_ARID4B:110, 8222              | in gene, downstream      | 1 | 32.000 | 2 | 1_Testes_ARID4B: |
| 1_Testes_ARID4B:7681, -431, -7087      | downstream, upstream     | 1 | 30.333 | 3 | 1_Testes_ARID4B: |
| 1_Testes_ARID4B:-7764, 348, 7004       | upstream, in gene, in g  | 1 | 30.333 | 3 | 1_Testes_ARID4B: |
| 1_Testes_ARID4B:                       | 476 in gene              | 1 | 16.000 | 1 | 1_Testes_ARID4B: |
| 1_Testes_ARID4B:                       | 948 in gene              | 1 | 19.000 | 1 | 1_Testes_ARID4B: |
| 1_Testes_ARID4B:                       | -9701 upstream           | 1 | 24.000 | 1 | 1_Testes_ARID4B: |

|                  |                                          |   |        |   |                  |
|------------------|------------------------------------------|---|--------|---|------------------|
| 1_Testes_ARID4B: | -4003 upstream                           | 1 | 24.000 | 1 | 1_Testes_ARID4B: |
| 1_Testes_ARID4B: | 126 in gene                              | 1 | 30.000 | 1 | 1_Testes_ARID4B: |
| 1_Testes_ARID4B: | 163 in gene                              | 1 | 30.000 | 1 | 1_Testes_ARID4B: |
| 1_Testes_ARID4B: | 224 in gene                              | 1 | 16.000 | 1 | 1_Testes_ARID4B: |
| 1_Testes_ARID4B: | -5815 upstream                           | 1 | 16.000 | 1 | 1_Testes_ARID4B: |
| 1_Testes_ARID4B: | 1118 in gene                             | 1 | 16.000 | 1 | 1_Testes_ARID4B: |
| 1_Testes_ARID4B: | 1040 in gene                             | 1 | 22.000 | 1 | 1_Testes_ARID4B: |
| 1_Testes_ARID4B: | 216 in gene                              | 1 | 36.000 | 1 | 1_Testes_ARID4B: |
| 1_Testes_ARID4B: | 402 in gene                              | 1 | 36.000 | 1 | 1_Testes_ARID4B: |
| 1_Testes_ARID4B: | 474 in gene                              | 1 | 33.000 | 1 | 1_Testes_ARID4B: |
| 1_Testes_ARID4B: | 98 in gene                               | 1 | 27.000 | 1 | 1_Testes_ARID4B: |
| 1_Testes_ARID4B: | 51098 downstream                         | 1 | 27.000 | 1 | 1_Testes_ARID4B: |
| 1_Testes_ARID4B: | 407 in gene                              | 1 | 25.000 | 1 | 1_Testes_ARID4B: |
| 1_Testes_ARID4B: | 83201 downstream                         | 1 | 25.000 | 1 | 1_Testes_ARID4B: |
| 1_Testes_ARID4B: | 236 in gene                              | 1 | 19.000 | 1 | 1_Testes_ARID4B: |
| 1_Testes_ARID4B: | 277 in gene                              | 1 | 21.000 | 1 | 1_Testes_ARID4B: |
| 1_Testes_ARID4B: | 1879 in gene                             | 1 | 21.000 | 1 | 1_Testes_ARID4B: |
| 1_Testes_ARID4B: | 39833 downstream                         | 1 | 16.000 | 1 | 1_Testes_ARID4B: |
| 1_Testes_ARID4B: | 240 in gene                              | 1 | 16.000 | 1 | 1_Testes_ARID4B: |
| 1_Testes_ARID4B: | 25314 downstream                         | 1 | 19.000 | 1 | 1_Testes_ARID4B: |
| 1_Testes_ARID4B: | 3038 in gene                             | 1 | 19.000 | 1 | 1_Testes_ARID4B: |
| 1_Testes_ARID4B: | -4343 upstream                           | 1 | 19.000 | 1 | 1_Testes_ARID4B: |
| 1_Testes_ARID4B: | 19650 downstream                         | 1 | 18.000 | 1 | 1_Testes_ARID4B: |
| 1_Testes_ARID4B: | -3398 upstream                           | 1 | 18.000 | 1 | 1_Testes_ARID4B: |
| 1_Testes_ARID4B: | 198 in gene                              | 1 | 18.000 | 1 | 1_Testes_ARID4B: |
| 1_Testes_ARID4B: | 10942 downstream                         | 1 | 18.000 | 1 | 1_Testes_ARID4B: |
| 1_Testes_ARID4B: | 10548 in gene                            | 1 | 18.000 | 1 | 1_Testes_ARID4B: |
| 1_Testes_ARID4B: | 227 in gene                              | 1 | 18.000 | 1 | 1_Testes_ARID4B: |
| 1_Testes_ARID4B: | 17470 downstream                         | 1 | 18.000 | 1 | 1_Testes_ARID4B: |
| 1_Testes_ARID4B: | 10378 downstream                         | 1 | 31.000 | 1 | 1_Testes_ARID4B: |
| 1_Testes_ARID4B: | 5490 downstream                          | 1 | 31.000 | 1 | 1_Testes_ARID4B: |
| 1_Testes_ARID4B: | 682 in gene                              | 1 | 31.000 | 1 | 1_Testes_ARID4B: |
| 1_Testes_ARID4B: | 17313 downstream                         | 1 | 31.000 | 1 | 1_Testes_ARID4B: |
| 1_Testes_ARID4B: | -52 upstream                             | 1 | 31.000 | 1 | 1_Testes_ARID4B: |
| 1_Testes_ARID4B: | -58 upstream                             | 1 | 31.000 | 1 | 1_Testes_ARID4B: |
| 1_Testes_ARID4B: | -139 upstream                            | 1 | 26.000 | 1 | 1_Testes_ARID4B: |
| 1_Testes_ARID4B: | 142 in gene                              | 1 | 28.000 | 1 | 1_Testes_ARID4B: |
| 1_Testes_ARID4B: | -699 upstream                            | 1 | 26.000 | 1 | 1_Testes_ARID4B: |
| 1_Testes_ARID4B: | -329 upstream                            | 1 | 26.000 | 1 | 1_Testes_ARID4B: |
| 1_Testes_ARID4B: | 29065, 425 downstream, in gene           | 1 | 23.000 | 2 | 1_Testes_ARID4B: |
| 1_Testes_ARID4B: | 29934, 2766, -370 downstream, in gene, u | 1 | 23.333 | 3 | 1_Testes_ARID4B: |
| 1_Testes_ARID4B: | -2186, 950 upstream, in gene             | 1 | 26.500 | 2 | 1_Testes_ARID4B: |
| 1_Testes_ARID4B: | 335 in gene                              | 1 | 39.000 | 1 | 1_Testes_ARID4B: |
| 1_Testes_ARID4B: | -338 upstream                            | 1 | 39.000 | 1 | 1_Testes_ARID4B: |
| 1_Testes_ARID4B: | 67 in gene                               | 1 | 27.000 | 1 | 1_Testes_ARID4B: |
| 1_Testes_ARID4B: | 768 in gene                              | 1 | 27.000 | 1 | 1_Testes_ARID4B: |
| 1_Testes_ARID4B: | 190 in gene                              | 1 | 40.000 | 1 | 1_Testes_ARID4B: |



|                             |                     |   |        |   |                  |
|-----------------------------|---------------------|---|--------|---|------------------|
| 1_Testes_ARID4B:            | -6317 upstream      | 1 | 45.000 | 1 | 1_Testes_ARID4B: |
| 1_Testes_ARID4B:            | 1022 in gene        | 1 | 45.000 | 1 | 1_Testes_ARID4B: |
| 1_Testes_ARID4B:            | 234 in gene         | 1 | 43.000 | 1 | 1_Testes_ARID4B: |
| 1_Testes_ARID4B:            | 30151 in gene       | 1 | 38.000 | 1 | 1_Testes_ARID4B: |
| 1_Testes_ARID4B:            | 132 in gene         | 1 | 31.000 | 1 | 1_Testes_ARID4B: |
| 1_Testes_ARID4B:            | 392 in gene         | 1 | 21.000 | 1 | 1_Testes_ARID4B: |
| 1_Testes_ARID4B:            | 32043 in gene       | 1 | 24.000 | 1 | 1_Testes_ARID4B: |
| 1_Testes_ARID4B:            | -961 upstream       | 1 | 36.000 | 1 | 1_Testes_ARID4B: |
| 1_Testes_ARID4B:            | 583 in gene         | 1 | 36.000 | 1 | 1_Testes_ARID4B: |
| 1_Testes_ARID4B:            | 497 in gene         | 1 | 26.000 | 1 | 1_Testes_ARID4B: |
| 1_Testes_ARID4B:            | -346 upstream       | 1 | 24.000 | 1 | 1_Testes_ARID4B: |
| 1_Testes_ARID4B:            | 199 in gene         | 1 | 28.000 | 1 | 1_Testes_ARID4B: |
| 1_Testes_ARID4B:            | 563 in gene         | 1 | 25.000 | 1 | 1_Testes_ARID4B: |
| 1_Testes_ARID4B: 6, 27782   | in gene, downstream | 1 | 27.000 | 2 | 1_Testes_ARID4B: |
| 1_Testes_ARID4B:            | -143 upstream       | 1 | 25.000 | 1 | 1_Testes_ARID4B: |
| 1_Testes_ARID4B:            | 20455 downstream    | 1 | 26.000 | 1 | 1_Testes_ARID4B: |
| 1_Testes_ARID4B:            | 175 in gene         | 1 | 26.000 | 1 | 1_Testes_ARID4B: |
| 1_Testes_ARID4B:            | 249 in gene         | 1 | 27.000 | 1 | 1_Testes_ARID4B: |
| 1_Testes_ARID4B:            | 99547 downstream    | 1 | 21.000 | 1 | 1_Testes_ARID4B: |
| 1_Testes_ARID4B: 239, 16847 | in gene, in gene    | 1 | 24.500 | 2 | 1_Testes_ARID4B: |
| 1_Testes_ARID4B:            | 139 in gene         | 1 | 34.000 | 1 | 1_Testes_ARID4B: |
| 1_Testes_ARID4B:            | 377 in gene         | 1 | 38.000 | 1 | 1_Testes_ARID4B: |
| 1_Testes_ARID4B:            | 205 in gene         | 1 | 25.000 | 1 | 1_Testes_ARID4B: |
| 1_Testes_ARID4B:            | -662 upstream       | 1 | 31.000 | 1 | 1_Testes_ARID4B: |
| 1_Testes_ARID4B:            | 15 in gene          | 1 | 31.000 | 1 | 1_Testes_ARID4B: |
| 1_Testes_ARID4B:            | -7173 upstream      | 1 | 26.000 | 1 | 1_Testes_ARID4B: |
| 1_Testes_ARID4B:            | 132 in gene         | 1 | 26.000 | 1 | 1_Testes_ARID4B: |
| 1_Testes_ARID4B:            | 399 in gene         | 1 | 19.000 | 1 | 1_Testes_ARID4B: |
| 1_Testes_ARID4B:            | -220 upstream       | 1 | 19.000 | 1 | 1_Testes_ARID4B: |
| 1_Testes_ARID4B:            | -3784 upstream      | 1 | 19.000 | 1 | 1_Testes_ARID4B: |
| 1_Testes_ARID4B:            | 181 in gene         | 1 | 27.000 | 1 | 1_Testes_ARID4B: |
| 1_Testes_ARID4B:            | -2794 upstream      | 1 | 19.000 | 1 | 1_Testes_ARID4B: |
| 1_Testes_ARID4B:            | 685 in gene         | 1 | 35.000 | 1 | 1_Testes_ARID4B: |
| 1_Testes_ARID4B:            | 174734 in gene      | 1 | 20.000 | 1 | 1_Testes_ARID4B: |
| 1_Testes_ARID4B:            | 7061 downstream     | 1 | 20.000 | 1 | 1_Testes_ARID4B: |
| 1_Testes_ARID4B:            | -6954 upstream      | 1 | 20.000 | 1 | 1_Testes_ARID4B: |
| 1_Testes_ARID4B:            | -3655 upstream      | 1 | 20.000 | 1 | 1_Testes_ARID4B: |
| 1_Testes_ARID4B:            | 485 in gene         | 1 | 20.000 | 1 | 1_Testes_ARID4B: |
| 1_Testes_ARID4B:            | 434 in gene         | 1 | 24.000 | 1 | 1_Testes_ARID4B: |
| 1_Testes_ARID4B:            | 346 in gene         | 1 | 29.000 | 1 | 1_Testes_ARID4B: |
| 1_Testes_ARID4B:            | -635 upstream       | 1 | 29.000 | 1 | 1_Testes_ARID4B: |
| 1_Testes_ARID4B:            | 22386 downstream    | 1 | 29.000 | 1 | 1_Testes_ARID4B: |
| 1_Testes_ARID4B:            | 489 in gene         | 1 | 36.000 | 1 | 1_Testes_ARID4B: |
| 1_Testes_ARID4B:            | 108 in gene         | 1 | 34.000 | 1 | 1_Testes_ARID4B: |
| 1_Testes_ARID4B:            | -4177 upstream      | 1 | 26.000 | 1 | 1_Testes_ARID4B: |
| 1_Testes_ARID4B:            | -642 upstream       | 1 | 26.000 | 1 | 1_Testes_ARID4B: |
| 1_Testes_ARID4B:            | -184 upstream       | 1 | 24.000 | 1 | 1_Testes_ARID4B: |

|                              |                      |   |        |   |                  |
|------------------------------|----------------------|---|--------|---|------------------|
| 1_Testes_ARID4B:             | -16 upstream         | 1 | 24.000 | 1 | 1_Testes_ARID4B: |
| 1_Testes_ARID4B: 30745, -231 | downstream, upstream | 1 | 30.000 | 2 | 1_Testes_ARID4B: |
| 1_Testes_ARID4B:             | -151 upstream        | 1 | 36.000 | 1 | 1_Testes_ARID4B: |
| 1_Testes_ARID4B:             | 72 in gene           | 1 | 25.000 | 1 | 1_Testes_ARID4B: |
| 1_Testes_ARID4B:             | 17449 downstream     | 1 | 25.000 | 1 | 1_Testes_ARID4B: |
| 1_Testes_ARID4B:             | 200 in gene          | 1 | 26.000 | 1 | 1_Testes_ARID4B: |
| 1_Testes_ARID4B:             | -356 upstream        | 1 | 26.000 | 1 | 1_Testes_ARID4B: |
| 1_Testes_ARID4B: 120, 1928   | in gene, in gene     | 1 | 32.500 | 2 | 1_Testes_ARID4B: |
| 1_Testes_ARID4B:             | 201 in gene          | 1 | 28.000 | 1 | 1_Testes_ARID4B: |
| 1_Testes_ARID4B: 111, 35615  | in gene, in gene     | 1 | 22.500 | 2 | 1_Testes_ARID4B: |
| 1_Testes_ARID4B:             | 7176 downstream      | 1 | 22.000 | 1 | 1_Testes_ARID4B: |
| 1_Testes_ARID4B:             | 214 in gene          | 1 | 25.000 | 1 | 1_Testes_ARID4B: |
| 1_Testes_ARID4B:             | 14604 downstream     | 1 | 25.000 | 1 | 1_Testes_ARID4B: |
| 1_Testes_ARID4B:             | 185 in gene          | 1 | 29.000 | 1 | 1_Testes_ARID4B: |
| 1_Testes_ARID4B:             | -9086 upstream       | 1 | 24.000 | 1 | 1_Testes_ARID4B: |
| 1_Testes_ARID4B:             | 282 in gene          | 1 | 24.000 | 1 | 1_Testes_ARID4B: |
| 1_Testes_ARID4B:             | 18388 downstream     | 1 | 29.000 | 1 | 1_Testes_ARID4B: |
| 1_Testes_ARID4B:             | 20 in gene           | 1 | 29.000 | 1 | 1_Testes_ARID4B: |
| 1_Testes_ARID4B:             | 659 in gene          | 1 | 17.000 | 1 | 1_Testes_ARID4B: |
| 1_Testes_ARID4B:             | 66431 downstream     | 1 | 17.000 | 1 | 1_Testes_ARID4B: |
| 1_Testes_ARID4B:             | -649 upstream        | 1 | 19.000 | 1 | 1_Testes_ARID4B: |
| 1_Testes_ARID4B:             | -149 upstream        | 1 | 19.000 | 1 | 1_Testes_ARID4B: |
| 1_Testes_ARID4B:             | 539 in gene          | 1 | 28.000 | 1 | 1_Testes_ARID4B: |
| 1_Testes_ARID4B:             | -442 upstream        | 1 | 30.000 | 1 | 1_Testes_ARID4B: |
| 1_Testes_ARID4B:             | 342 in gene          | 1 | 30.000 | 1 | 1_Testes_ARID4B: |
| 1_Testes_ARID4B:             | 15514 downstream     | 1 | 30.000 | 1 | 1_Testes_ARID4B: |
| 1_Testes_ARID4B:             | 49 in gene           | 1 | 20.000 | 1 | 1_Testes_ARID4B: |
| 1_Testes_ARID4B:             | 83 in gene           | 1 | 18.000 | 1 | 1_Testes_ARID4B: |
| 1_Testes_ARID4B:             | -7907 upstream       | 1 | 18.000 | 1 | 1_Testes_ARID4B: |
| 1_Testes_ARID4B:             | 454 in gene          | 1 | 27.000 | 1 | 1_Testes_ARID4B: |
| 1_Testes_ARID4B:             | 2345 downstream      | 1 | 27.000 | 1 | 1_Testes_ARID4B: |
| 1_Testes_ARID4B:             | 298 in gene          | 1 | 20.000 | 1 | 1_Testes_ARID4B: |
| 1_Testes_ARID4B:             | 397 in gene          | 1 | 29.000 | 1 | 1_Testes_ARID4B: |
| 1_Testes_ARID4B:             | 28 in gene           | 1 | 27.000 | 1 | 1_Testes_ARID4B: |
| 1_Testes_ARID4B:             | 1194 in gene         | 1 | 27.000 | 1 | 1_Testes_ARID4B: |
| 1_Testes_ARID4B:             | 972 in gene          | 1 | 25.000 | 1 | 1_Testes_ARID4B: |
| 1_Testes_ARID4B:             | 245 in gene          | 1 | 34.000 | 1 | 1_Testes_ARID4B: |
| 1_Testes_ARID4B:             | -211 upstream        | 1 | 22.000 | 1 | 1_Testes_ARID4B: |
| 1_Testes_ARID4B:             | -728 upstream        | 1 | 26.000 | 1 | 1_Testes_ARID4B: |
| 1_Testes_ARID4B:             | 249 in gene          | 1 | 26.000 | 1 | 1_Testes_ARID4B: |
| 1_Testes_ARID4B:             | 209 in gene          | 1 | 24.000 | 1 | 1_Testes_ARID4B: |
| 1_Testes_ARID4B:             | -322 upstream        | 1 | 25.000 | 1 | 1_Testes_ARID4B: |
| 1_Testes_ARID4B:             | 273 in gene          | 1 | 28.000 | 1 | 1_Testes_ARID4B: |
| 1_Testes_ARID4B:             | 233 in gene          | 1 | 23.000 | 1 | 1_Testes_ARID4B: |
| 1_Testes_ARID4B:             | -3241 upstream       | 1 | 36.000 | 1 | 1_Testes_ARID4B: |
| 1_Testes_ARID4B:             | 81 in gene           | 1 | 22.000 | 1 | 1_Testes_ARID4B: |
| 1_Testes_ARID4B:             | 334 in gene          | 1 | 26.000 | 1 | 1_Testes_ARID4B: |

|                                    |                         |   |        |   |                  |
|------------------------------------|-------------------------|---|--------|---|------------------|
| 1_Testes_ARID4B: 59, -1621         | in gene, upstream       | 1 | 29.000 | 2 | 1_Testes_ARID4B: |
| 1_Testes_ARID4B: -289, 1391        | upstream, in gene       | 1 | 29.000 | 2 | 1_Testes_ARID4B: |
| 1_Testes_ARID4B:                   | 63132 in gene           | 1 | 30.000 | 1 | 1_Testes_ARID4B: |
| 1_Testes_ARID4B: 157146, 33018     | downstream, in gene     | 1 | 25.500 | 2 | 1_Testes_ARID4B: |
| 1_Testes_ARID4B:                   | 887 in gene             | 1 | 37.000 | 1 | 1_Testes_ARID4B: |
| 1_Testes_ARID4B:                   | -1105 upstream          | 1 | 37.000 | 1 | 1_Testes_ARID4B: |
| 1_Testes_ARID4B:                   | 363 in gene             | 1 | 31.000 | 1 | 1_Testes_ARID4B: |
| 1_Testes_ARID4B:                   | 183 in gene             | 1 | 26.000 | 1 | 1_Testes_ARID4B: |
| 1_Testes_ARID4B:                   | 11020 in gene           | 1 | 32.000 | 1 | 1_Testes_ARID4B: |
| 1_Testes_ARID4B:                   | 118866 in gene          | 1 | 26.000 | 1 | 1_Testes_ARID4B: |
| 1_Testes_ARID4B:                   | 806 in gene             | 1 | 23.000 | 1 | 1_Testes_ARID4B: |
| 1_Testes_ARID4B:                   | 110 in gene             | 1 | 26.000 | 1 | 1_Testes_ARID4B: |
| 1_Testes_ARID4B:                   | 31613 downstream        | 1 | 34.000 | 1 | 1_Testes_ARID4B: |
| 1_Testes_ARID4B:                   | 324 in gene             | 1 | 34.000 | 1 | 1_Testes_ARID4B: |
| 1_Testes_ARID4B:                   | 189 in gene             | 1 | 32.000 | 1 | 1_Testes_ARID4B: |
| 1_Testes_ARID4B:                   | 895 in gene             | 1 | 32.000 | 1 | 1_Testes_ARID4B: |
| 1_Testes_ARID4B:                   | 407 in gene             | 1 | 32.000 | 1 | 1_Testes_ARID4B: |
| 1_Testes_ARID4B:                   | 196 in gene             | 1 | 31.000 | 1 | 1_Testes_ARID4B: |
| 1_Testes_ARID4B:                   | 277 in gene             | 1 | 26.000 | 1 | 1_Testes_ARID4B: |
| 1_Testes_ARID4B:                   | 351 in gene             | 1 | 22.000 | 1 | 1_Testes_ARID4B: |
| 1_Testes_ARID4B:                   | 311618 in gene          | 1 | 24.000 | 1 | 1_Testes_ARID4B: |
| 1_Testes_ARID4B:                   | 287 in gene             | 1 | 24.000 | 1 | 1_Testes_ARID4B: |
| 1_Testes_ARID4B: 135, 903          | in gene, in gene        | 1 | 22.000 | 2 | 1_Testes_ARID4B: |
| 1_Testes_ARID4B:                   | 106 in gene             | 1 | 22.000 | 1 | 1_Testes_ARID4B: |
| 1_Testes_ARID4B:                   | 837 in gene             | 1 | 17.000 | 1 | 1_Testes_ARID4B: |
| 1_Testes_ARID4B:                   | 90 in gene              | 1 | 18.000 | 1 | 1_Testes_ARID4B: |
| 1_Testes_ARID4B:                   | 292 in gene             | 1 | 19.000 | 1 | 1_Testes_ARID4B: |
| 1_Testes_ARID4B:                   | 230 in gene             | 1 | 38.000 | 1 | 1_Testes_ARID4B: |
| 1_Testes_ARID4B:                   | 293 in gene             | 1 | 33.000 | 1 | 1_Testes_ARID4B: |
| 1_Testes_ARID4B:                   | -8601 upstream          | 1 | 39.000 | 1 | 1_Testes_ARID4B: |
| 1_Testes_ARID4B:                   | -18 upstream            | 1 | 39.000 | 1 | 1_Testes_ARID4B: |
| 1_Testes_ARID4B:                   | 361 in gene             | 1 | 39.000 | 1 | 1_Testes_ARID4B: |
| 1_Testes_ARID4B: 93803, 22507, 443 | downstream, in gene, in | 1 | 32.667 | 3 | 1_Testes_ARID4B: |
| 1_Testes_ARID4B:                   | 206 in gene             | 1 | 39.000 | 1 | 1_Testes_ARID4B: |
| 1_Testes_ARID4B:                   | -285 upstream           | 1 | 39.000 | 1 | 1_Testes_ARID4B: |
| 1_Testes_ARID4B:                   | 299 in gene             | 1 | 27.000 | 1 | 1_Testes_ARID4B: |
| 1_Testes_ARID4B:                   | -103 upstream           | 1 | 27.000 | 1 | 1_Testes_ARID4B: |
| 1_Testes_ARID4B:                   | 9800 downstream         | 1 | 23.000 | 1 | 1_Testes_ARID4B: |
| 1_Testes_ARID4B: 393, 19929        | in gene, downstream     | 1 | 22.000 | 2 | 1_Testes_ARID4B: |
| 1_Testes_ARID4B: 19060, -476       | downstream, upstream    | 1 | 22.000 | 2 | 1_Testes_ARID4B: |
| 1_Testes_ARID4B: 143, 13167        | in gene, downstream     | 1 | 23.500 | 2 | 1_Testes_ARID4B: |
| 1_Testes_ARID4B: 177, 17601        | in gene, downstream     | 1 | 21.500 | 2 | 1_Testes_ARID4B: |
| 1_Testes_ARID4B: 177, 17601        | in gene, downstream     | 1 | 21.500 | 2 | 1_Testes_ARID4B: |
| 1_Testes_ARID4B: 19897, 313        | in gene, in gene        | 1 | 25.500 | 2 | 1_Testes_ARID4B: |
| 1_Testes_ARID4B:                   | 1060 in gene            | 1 | 20.000 | 1 | 1_Testes_ARID4B: |
| 1_Testes_ARID4B:                   | 64965 downstream        | 1 | 20.000 | 1 | 1_Testes_ARID4B: |
| 1_Testes_ARID4B:                   | 17052 downstream        | 1 | 33.000 | 1 | 1_Testes_ARID4B: |

|                                      |                          |   |        |   |                  |
|--------------------------------------|--------------------------|---|--------|---|------------------|
| 1_Testes_ARID4B:                     | -3469 upstream           | 1 | 33.000 | 1 | 1_Testes_ARID4B: |
| 1_Testes_ARID4B:                     | 159 in gene              | 1 | 33.000 | 1 | 1_Testes_ARID4B: |
| 1_Testes_ARID4B:                     | 12972 downstream         | 1 | 33.000 | 1 | 1_Testes_ARID4B: |
| 1_Testes_ARID4B:                     | 12033 downstream         | 1 | 25.000 | 1 | 1_Testes_ARID4B: |
| 1_Testes_ARID4B: 101, 55109          | in gene, downstream      | 1 | 28.000 | 2 | 1_Testes_ARID4B: |
| 1_Testes_ARID4B:                     | 303 in gene              | 1 | 31.000 | 1 | 1_Testes_ARID4B: |
| 1_Testes_ARID4B: 13530, -982, -3238  | downstream, upstream     | 1 | 28.333 | 3 | 1_Testes_ARID4B: |
| 1_Testes_ARID4B: -7548, -5292, 14580 | upstream, upstream, d    | 1 | 26.000 | 3 | 1_Testes_ARID4B: |
| 1_Testes_ARID4B:                     | 211 in gene              | 1 | 24.000 | 1 | 1_Testes_ARID4B: |
| 1_Testes_ARID4B:                     | 282 in gene              | 1 | 27.000 | 1 | 1_Testes_ARID4B: |
| 1_Testes_ARID4B:                     | 2165 in gene             | 1 | 63.000 | 1 | 1_Testes_ARID4B: |
| 1_Testes_ARID4B:                     | -8256 upstream           | 1 | 63.000 | 1 | 1_Testes_ARID4B: |
| 1_Testes_ARID4B:                     | 31040 downstream         | 1 | 36.000 | 1 | 1_Testes_ARID4B: |
| 1_Testes_ARID4B:                     | 425 in gene              | 1 | 36.000 | 1 | 1_Testes_ARID4B: |
| 1_Testes_ARID4B:                     | 5817 downstream          | 1 | 36.000 | 1 | 1_Testes_ARID4B: |
| 1_Testes_ARID4B: 11559, -8238, -9737 | downstream, upstream     | 1 | 28.000 | 3 | 1_Testes_ARID4B: |
| 1_Testes_ARID4B: 1811, 312           | in gene, in gene         | 1 | 24.000 | 2 | 1_Testes_ARID4B: |
| 1_Testes_ARID4B: -1961, -462         | upstream, upstream       | 1 | 24.000 | 2 | 1_Testes_ARID4B: |
| 1_Testes_ARID4B: 17532, 16033, -4399 | downstream, downstre     | 1 | 24.333 | 3 | 1_Testes_ARID4B: |
| 1_Testes_ARID4B:                     | 648 in gene              | 1 | 24.000 | 1 | 1_Testes_ARID4B: |
| 1_Testes_ARID4B: 17936, -8608        | downstream, upstream     | 1 | 23.000 | 2 | 1_Testes_ARID4B: |
| 1_Testes_ARID4B: 2619, 10427         | downstream, downstre     | 1 | 24.000 | 2 | 1_Testes_ARID4B: |
| 1_Testes_ARID4B: 7874, 66            | downstream, in gene      | 1 | 24.000 | 2 | 1_Testes_ARID4B: |
| 1_Testes_ARID4B: 19333, -2187, -4587 | downstream, upstream     | 1 | 28.667 | 3 | 1_Testes_ARID4B: |
| 1_Testes_ARID4B: 2499, 99, -9085     | in gene, in gene, upstre | 1 | 28.333 | 3 | 1_Testes_ARID4B: |
| 1_Testes_ARID4B: 912, -1488          | downstream, upstream     | 1 | 30.000 | 2 | 1_Testes_ARID4B: |
| 1_Testes_ARID4B: -8630, 554          | upstream, in gene        | 1 | 34.500 | 2 | 1_Testes_ARID4B: |
| 1_Testes_ARID4B:                     | -226 upstream            | 1 | 30.000 | 1 | 1_Testes_ARID4B: |
| 1_Testes_ARID4B: 102, 94646          | in gene, downstream      | 1 | 29.500 | 2 | 1_Testes_ARID4B: |
| 1_Testes_ARID4B: 512, 4608           | in gene, downstream      | 1 | 31.500 | 2 | 1_Testes_ARID4B: |
| 1_Testes_ARID4B: -3938, 158, 9758    | upstream, in gene, dow   | 1 | 35.333 | 3 | 1_Testes_ARID4B: |
| 1_Testes_ARID4B: 14592, 10496, 896   | downstream, downstre     | 1 | 35.333 | 3 | 1_Testes_ARID4B: |
| 1_Testes_ARID4B: 14745, -10343       | downstream, upstream     | 1 | 45.500 | 2 | 1_Testes_ARID4B: |
| 1_Testes_ARID4B:                     | 9289 downstream          | 1 | 48.000 | 1 | 1_Testes_ARID4B: |
| 1_Testes_ARID4B:                     | 132 in gene              | 1 | 48.000 | 1 | 1_Testes_ARID4B: |
| 1_Testes_ARID4B: 2073, 41            | in gene, in gene         | 1 | 25.000 | 2 | 1_Testes_ARID4B: |
| 1_Testes_ARID4B: -3342, -1310        | upstream, upstream       | 1 | 25.000 | 2 | 1_Testes_ARID4B: |
| 1_Testes_ARID4B: -7610, -5578, 12182 | upstream, upstream, d    | 1 | 22.333 | 3 | 1_Testes_ARID4B: |
| 1_Testes_ARID4B:                     | 4691 in gene             | 1 | 17.000 | 1 | 1_Testes_ARID4B: |
| 1_Testes_ARID4B:                     | -6727 upstream           | 1 | 17.000 | 1 | 1_Testes_ARID4B: |
| 1_Testes_ARID4B:                     | 23425 downstream         | 1 | 36.000 | 1 | 1_Testes_ARID4B: |
| 1_Testes_ARID4B:                     | 168 in gene              | 1 | 36.000 | 1 | 1_Testes_ARID4B: |
| 1_Testes_ARID4B: -5294, 13714        | upstream, downstream     | 1 | 32.000 | 2 | 1_Testes_ARID4B: |
| 1_Testes_ARID4B:                     | 336 in gene              | 1 | 28.000 | 1 | 1_Testes_ARID4B: |
| 1_Testes_ARID4B:                     | 120 in gene              | 1 | 20.000 | 1 | 1_Testes_ARID4B: |
| 1_Testes_ARID4B:                     | -4746 upstream           | 1 | 20.000 | 1 | 1_Testes_ARID4B: |
| 1_Testes_ARID4B:                     | -340 upstream            | 1 | 16.000 | 1 | 1_Testes_ARID4B: |

|                                   |                        |   |        |   |                  |
|-----------------------------------|------------------------|---|--------|---|------------------|
| 1_Testes_ARID4B:100, 26276        | in gene, downstream    | 1 | 27.500 | 2 | 1_Testes_ARID4B: |
| 1_Testes_ARID4B:                  | 368 in gene            | 1 | 21.000 | 1 | 1_Testes_ARID4B: |
| 1_Testes_ARID4B:                  | 170 in gene            | 1 | 31.000 | 1 | 1_Testes_ARID4B: |
| 1_Testes_ARID4B:                  | 98 in gene             | 1 | 31.000 | 1 | 1_Testes_ARID4B: |
| 1_Testes_ARID4B:                  | 22402 downstream       | 1 | 31.000 | 1 | 1_Testes_ARID4B: |
| 1_Testes_ARID4B:                  | 257 in gene            | 1 | 48.000 | 1 | 1_Testes_ARID4B: |
| 1_Testes_ARID4B:17638, 486        | downstream, in gene    | 1 | 39.500 | 2 | 1_Testes_ARID4B: |
| 1_Testes_ARID4B:56182, 454        | downstream, in gene    | 1 | 36.500 | 2 | 1_Testes_ARID4B: |
| 1_Testes_ARID4B:15753, 76670      | in gene, downstream    | 1 | 21.000 | 2 | 1_Testes_ARID4B: |
| 1_Testes_ARID4B:                  | 93 in gene             | 1 | 26.000 | 1 | 1_Testes_ARID4B: |
| 1_Testes_ARID4B:                  | -788 upstream          | 1 | 26.000 | 1 | 1_Testes_ARID4B: |
| 1_Testes_ARID4B:-7, 40185         | upstream, downstream   | 1 | 23.500 | 2 | 1_Testes_ARID4B: |
| 1_Testes_ARID4B:                  | 202 in gene            | 1 | 27.000 | 1 | 1_Testes_ARID4B: |
| 1_Testes_ARID4B:                  | 16046 downstream       | 1 | 26.000 | 1 | 1_Testes_ARID4B: |
| 1_Testes_ARID4B:                  | 136 in gene            | 1 | 26.000 | 1 | 1_Testes_ARID4B: |
| 1_Testes_ARID4B:                  | 227 in gene            | 1 | 21.000 | 1 | 1_Testes_ARID4B: |
| 1_Testes_ARID4B:                  | 624 in gene            | 1 | 21.000 | 1 | 1_Testes_ARID4B: |
| 1_Testes_ARID4B:                  | 75 in gene             | 1 | 28.000 | 1 | 1_Testes_ARID4B: |
| 1_Testes_ARID4B:                  | -288 upstream          | 1 | 38.000 | 1 | 1_Testes_ARID4B: |
| 1_Testes_ARID4B:                  | -119 upstream          | 1 | 38.000 | 1 | 1_Testes_ARID4B: |
| 1_Testes_ARID4B:                  | 1851 in gene           | 1 | 26.000 | 1 | 1_Testes_ARID4B: |
| 1_Testes_ARID4B:                  | 44 in gene             | 1 | 24.000 | 1 | 1_Testes_ARID4B: |
| 1_Testes_ARID4B:                  | -60 upstream           | 1 | 32.000 | 1 | 1_Testes_ARID4B: |
| 1_Testes_ARID4B:                  | 316 in gene            | 1 | 37.000 | 1 | 1_Testes_ARID4B: |
| 1_Testes_ARID4B:                  | -396 upstream          | 1 | 37.000 | 1 | 1_Testes_ARID4B: |
| 1_Testes_ARID4B:                  | -8 upstream            | 1 | 19.000 | 1 | 1_Testes_ARID4B: |
| 1_Testes_ARID4B:                  | 835 in gene            | 1 | 33.000 | 1 | 1_Testes_ARID4B: |
| 1_Testes_ARID4B:                  | 767 in gene            | 1 | 39.000 | 1 | 1_Testes_ARID4B: |
| 1_Testes_ARID4B:                  | 602 in gene            | 1 | 33.000 | 1 | 1_Testes_ARID4B: |
| 1_Testes_ARID4B:                  | 728 in gene            | 1 | 33.000 | 1 | 1_Testes_ARID4B: |
| 1_Testes_ARID4B:                  | 46 in gene             | 1 | 22.000 | 1 | 1_Testes_ARID4B: |
| 1_Testes_ARID4B:                  | 294 in gene            | 1 | 30.000 | 1 | 1_Testes_ARID4B: |
| 1_Testes_ARID4B:                  | 337 in gene            | 1 | 35.000 | 1 | 1_Testes_ARID4B: |
| 1_Testes_ARID4B:186, 15642        | in gene, downstream    | 1 | 22.500 | 2 | 1_Testes_ARID4B: |
| 1_Testes_ARID4B:                  | 1680 in gene           | 1 | 22.000 | 1 | 1_Testes_ARID4B: |
| 1_Testes_ARID4B:                  | 30859 downstream       | 1 | 22.000 | 1 | 1_Testes_ARID4B: |
| 1_Testes_ARID4B:                  | 215 in gene            | 1 | 38.000 | 1 | 1_Testes_ARID4B: |
| 1_Testes_ARID4B:                  | 25919 downstream       | 1 | 38.000 | 1 | 1_Testes_ARID4B: |
| 1_Testes_ARID4B:                  | 990 in gene            | 1 | 33.000 | 1 | 1_Testes_ARID4B: |
| 1_Testes_ARID4B:                  | 17586 downstream       | 1 | 29.000 | 1 | 1_Testes_ARID4B: |
| 1_Testes_ARID4B:302, 25646, 28558 | in gene, downstream, c | 1 | 23.000 | 3 | 1_Testes_ARID4B: |
| 1_Testes_ARID4B:952, 3864         | in gene, downstream    | 1 | 20.000 | 2 | 1_Testes_ARID4B: |
| 1_Testes_ARID4B:-3082, -170, 9878 | upstream, upstream, d  | 1 | 20.000 | 3 | 1_Testes_ARID4B: |
| 1_Testes_ARID4B:10620, 572        | downstream, in gene    | 1 | 18.000 | 2 | 1_Testes_ARID4B: |
| 1_Testes_ARID4B:10097, 49         | downstream, in gene    | 1 | 18.000 | 2 | 1_Testes_ARID4B: |
| 1_Testes_ARID4B:                  | -9890 upstream         | 1 | 20.000 | 1 | 1_Testes_ARID4B: |
| 1_Testes_ARID4B:                  | -7576 upstream         | 1 | 20.000 | 1 | 1_Testes_ARID4B: |

|                                          |                         |   |        |   |                  |
|------------------------------------------|-------------------------|---|--------|---|------------------|
| 1_Testes_ARID4B:                         | -5341 upstream          | 1 | 20.000 | 1 | 1_Testes_ARID4B: |
| 1_Testes_ARID4B:                         | -5167 upstream          | 1 | 20.000 | 1 | 1_Testes_ARID4B: |
| 1_Testes_ARID4B:                         | -7142 upstream          | 1 | 32.000 | 1 | 1_Testes_ARID4B: |
| 1_Testes_ARID4B:                         | -7296 upstream          | 1 | 32.000 | 1 | 1_Testes_ARID4B: |
| 1_Testes_ARID4B:                         | -7439 upstream          | 1 | 32.000 | 1 | 1_Testes_ARID4B: |
| 1_Testes_ARID4B:                         | 7531 downstream         | 1 | 32.000 | 1 | 1_Testes_ARID4B: |
| 1_Testes_ARID4B:                         | 35666 downstream        | 1 | 32.000 | 1 | 1_Testes_ARID4B: |
| 1_Testes_ARID4B: 225, -7423              | in gene, upstream       | 1 | 32.000 | 2 | 1_Testes_ARID4B: |
| 1_Testes_ARID4B: 7788, 140               | downstream, in gene     | 1 | 32.000 | 2 | 1_Testes_ARID4B: |
| 1_Testes_ARID4B: 20824, 13176            | downstream, downstre    | 1 | 32.000 | 2 | 1_Testes_ARID4B: |
| 1_Testes_ARID4B:                         | 185148 in gene          | 1 | 15.000 | 1 | 1_Testes_ARID4B: |
| 1_Testes_ARID4B:                         | 996 in gene             | 1 | 42.000 | 1 | 1_Testes_ARID4B: |
| 1_Testes_ARID4B: 26006, 310              | downstream, in gene     | 1 | 31.000 | 2 | 1_Testes_ARID4B: |
| 1_Testes_ARID4B:                         | -1695 upstream          | 1 | 20.000 | 1 | 1_Testes_ARID4B: |
| 1_Testes_ARID4B: 74815, 1076             | in gene, in gene        | 1 | 23.000 | 2 | 1_Testes_ARID4B: |
| 1_Testes_ARID4B:                         | 2518 in gene            | 1 | 17.000 | 1 | 1_Testes_ARID4B: |
| 1_Testes_ARID4B:                         | -215 upstream           | 1 | 29.000 | 1 | 1_Testes_ARID4B: |
| 1_Testes_ARID4B: 198, 12534              | in gene, downstream     | 1 | 26.500 | 2 | 1_Testes_ARID4B: |
| 1_Testes_ARID4B: 8161, -4175, -6079      | downstream, upstream    | 1 | 35.000 | 3 | 1_Testes_ARID4B: |
| 1_Testes_ARID4B: 14451, 2115, 211, -101  | downstream, in gene, in | 1 | 34.750 | 4 | 1_Testes_ARID4B: |
| 1_Testes_ARID4B: -2372, -468, 9884       | upstream, upstream, d   | 1 | 36.667 | 3 | 1_Testes_ARID4B: |
| 1_Testes_ARID4B: -10266, 86              | upstream, in gene       | 1 | 43.000 | 2 | 1_Testes_ARID4B: |
| 1_Testes_ARID4B:                         | 11096 downstream        | 1 | 27.000 | 1 | 1_Testes_ARID4B: |
| 1_Testes_ARID4B:                         | 4400 downstream         | 1 | 27.000 | 1 | 1_Testes_ARID4B: |
| 1_Testes_ARID4B:                         | 24329 in gene           | 1 | 27.000 | 1 | 1_Testes_ARID4B: |
| 1_Testes_ARID4B:                         | 18849 downstream        | 1 | 26.000 | 1 | 1_Testes_ARID4B: |
| 1_Testes_ARID4B: 171, -3813, -10373      | in gene, upstream, upst | 1 | 24.667 | 3 | 1_Testes_ARID4B: |
| 1_Testes_ARID4B: 3693, -291, -6851, -848 | downstream, upstream    | 1 | 26.250 | 4 | 1_Testes_ARID4B: |
| 1_Testes_ARID4B: -3808, 176, 6736, 8368  | upstream, in gene, dow  | 1 | 26.250 | 4 | 1_Testes_ARID4B: |
| 1_Testes_ARID4B: 8924, 2364, 732, -7268  | downstream, downstre    | 1 | 25.750 | 4 | 1_Testes_ARID4B: |
| 1_Testes_ARID4B:                         | -4579 upstream          | 1 | 24.000 | 1 | 1_Testes_ARID4B: |
| 1_Testes_ARID4B:                         | -1730 upstream          | 1 | 21.000 | 1 | 1_Testes_ARID4B: |
| 1_Testes_ARID4B: 175, 10127, 11263       | in gene, downstream, c  | 1 | 21.000 | 3 | 1_Testes_ARID4B: |
| 1_Testes_ARID4B: -9907, 45, 1181, 23501  | upstream, in gene, in g | 1 | 23.000 | 4 | 1_Testes_ARID4B: |
| 1_Testes_ARID4B:                         | 27 in gene              | 1 | 29.000 | 1 | 1_Testes_ARID4B: |
| 1_Testes_ARID4B: 297, 11657              | in gene, downstream     | 1 | 31.500 | 2 | 1_Testes_ARID4B: |
| 1_Testes_ARID4B: 7566, -3794             | downstream, upstream    | 1 | 31.500 | 2 | 1_Testes_ARID4B: |
| 1_Testes_ARID4B:                         | 19 in gene              | 1 | 34.000 | 1 | 1_Testes_ARID4B: |
| 1_Testes_ARID4B:                         | 8970 downstream         | 1 | 34.000 | 1 | 1_Testes_ARID4B: |
| 1_Testes_ARID4B:                         | -9187 upstream          | 1 | 34.000 | 1 | 1_Testes_ARID4B: |
| 1_Testes_ARID4B:                         | 153 in gene             | 1 | 30.000 | 1 | 1_Testes_ARID4B: |
| 1_Testes_ARID4B:                         | -288 upstream           | 1 | 30.000 | 1 | 1_Testes_ARID4B: |
| 1_Testes_ARID4B:                         | 471 in gene             | 1 | 29.000 | 1 | 1_Testes_ARID4B: |
| 1_Testes_ARID4B:                         | 7 in gene               | 1 | 31.000 | 1 | 1_Testes_ARID4B: |
| 1_Testes_ARID4B:                         | 245 in gene             | 1 | 25.000 | 1 | 1_Testes_ARID4B: |
| 1_Testes_ARID4B:                         | -298 upstream           | 1 | 25.000 | 1 | 1_Testes_ARID4B: |
| 1_Testes_ARID4B:                         | 149 in gene             | 1 | 35.000 | 1 | 1_Testes_ARID4B: |

|                                     |                          |   |        |   |                  |
|-------------------------------------|--------------------------|---|--------|---|------------------|
| 1_Testes_ARID4B:                    | 566 in gene              | 1 | 26.000 | 1 | 1_Testes_ARID4B: |
| 1_Testes_ARID4B:                    | -259 upstream            | 1 | 26.000 | 1 | 1_Testes_ARID4B: |
| 1_Testes_ARID4B:                    | 607 in gene              | 1 | 27.000 | 1 | 1_Testes_ARID4B: |
| 1_Testes_ARID4B: 8731, 10091, 12011 | downstream, downstre     | 1 | 22.667 | 3 | 1_Testes_ARID4B: |
| 1_Testes_ARID4B: 3392, 2032, 112    | in gene, in gene, in gen | 1 | 22.667 | 3 | 1_Testes_ARID4B: |
| 1_Testes_ARID4B: -3612, -2252, -332 | upstream, upstream, u    | 1 | 22.667 | 3 | 1_Testes_ARID4B: |
| 1_Testes_ARID4B:                    | 1035 in gene             | 1 | 18.000 | 1 | 1_Testes_ARID4B: |
| 1_Testes_ARID4B:                    | 153 in gene              | 1 | 28.000 | 1 | 1_Testes_ARID4B: |
| 1_Testes_ARID4B:                    | 995 in gene              | 1 | 22.000 | 1 | 1_Testes_ARID4B: |
| 1_Testes_ARID4B: 93, 24237          | in gene, in gene         | 1 | 24.500 | 2 | 1_Testes_ARID4B: |
| 1_Testes_ARID4B:                    | 303 in gene              | 1 | 18.000 | 1 | 1_Testes_ARID4B: |
| 1_Testes_ARID4B:                    | 576 in gene              | 1 | 20.000 | 1 | 1_Testes_ARID4B: |
| 1_Testes_ARID4B:                    | 8384 in gene             | 1 | 21.000 | 1 | 1_Testes_ARID4B: |
| 1_Testes_ARID4B:                    | 49837 downstream         | 1 | 20.000 | 1 | 1_Testes_ARID4B: |
| 1_Testes_ARID4B:                    | 156 in gene              | 1 | 20.000 | 1 | 1_Testes_ARID4B: |
| 1_Testes_ARID4B:                    | 79485 in gene            | 1 | 23.000 | 1 | 1_Testes_ARID4B: |
| 1_Testes_ARID4B:                    | 242 in gene              | 1 | 33.000 | 1 | 1_Testes_ARID4B: |
| 1_Testes_ARID4B:                    | 1350 in gene             | 1 | 18.000 | 1 | 1_Testes_ARID4B: |
| 1_Testes_ARID4B:                    | -1871 upstream           | 1 | 18.000 | 1 | 1_Testes_ARID4B: |
| 1_Testes_ARID4B:                    | 1216 in gene             | 1 | 16.000 | 1 | 1_Testes_ARID4B: |
| 1_Testes_ARID4B:                    | 288 in gene              | 1 | 26.000 | 1 | 1_Testes_ARID4B: |
| 1_Testes_ARID4B:                    | 24687 downstream         | 1 | 26.000 | 1 | 1_Testes_ARID4B: |
| 1_Testes_ARID4B:                    | 151 in gene              | 1 | 29.000 | 1 | 1_Testes_ARID4B: |
| 1_Testes_ARID4B:                    | -8200 upstream           | 1 | 29.000 | 1 | 1_Testes_ARID4B: |
| 1_Testes_ARID4B:                    | 92 in gene               | 1 | 45.000 | 1 | 1_Testes_ARID4B: |
| 1_Testes_ARID4B:                    | 60037 downstream         | 1 | 20.000 | 1 | 1_Testes_ARID4B: |
| 1_Testes_ARID4B:                    | -228 upstream            | 1 | 20.000 | 1 | 1_Testes_ARID4B: |
| 1_Testes_ARID4B:                    | -124 upstream            | 1 | 31.000 | 1 | 1_Testes_ARID4B: |
| 1_Testes_ARID4B:                    | 2766 downstream          | 1 | 31.000 | 1 | 1_Testes_ARID4B: |
| 1_Testes_ARID4B: 47, 19439          | in gene, downstream      | 1 | 28.000 | 2 | 1_Testes_ARID4B: |
| 1_Testes_ARID4B:                    | 406 in gene              | 1 | 25.000 | 1 | 1_Testes_ARID4B: |
| 1_Testes_ARID4B:                    | 18456 downstream         | 1 | 25.000 | 1 | 1_Testes_ARID4B: |
| 1_Testes_ARID4B:                    | 4802 in gene             | 1 | 20.000 | 1 | 1_Testes_ARID4B: |
| 1_Testes_ARID4B:                    | -10398 upstream          | 1 | 20.000 | 1 | 1_Testes_ARID4B: |
| 1_Testes_ARID4B: 16869, 20080       | downstream, downstre     | 1 | 26.000 | 2 | 1_Testes_ARID4B: |
| 1_Testes_ARID4B: 3566, 355          | in gene, in gene         | 1 | 26.000 | 2 | 1_Testes_ARID4B: |
| 1_Testes_ARID4B: -3900, -689, 20308 | upstream, upstream, d    | 1 | 26.000 | 3 | 1_Testes_ARID4B: |
| 1_Testes_ARID4B:                    | 255 in gene              | 1 | 26.000 | 1 | 1_Testes_ARID4B: |
| 1_Testes_ARID4B:                    | -92 upstream             | 1 | 17.000 | 1 | 1_Testes_ARID4B: |
| 1_Testes_ARID4B:                    | 41 in gene               | 1 | 19.000 | 1 | 1_Testes_ARID4B: |
| 1_Testes_ARID4B:                    | 13155 downstream         | 1 | 24.000 | 1 | 1_Testes_ARID4B: |
| 1_Testes_ARID4B:                    | 279 in gene              | 1 | 24.000 | 1 | 1_Testes_ARID4B: |
| 1_Testes_ARID4B: 91270, 422         | downstream, in gene      | 1 | 23.500 | 2 | 1_Testes_ARID4B: |
| 1_Testes_ARID4B:                    | 210 in gene              | 1 | 23.000 | 1 | 1_Testes_ARID4B: |
| 1_Testes_ARID4B:                    | 559 in gene              | 1 | 21.000 | 1 | 1_Testes_ARID4B: |
| 1_Testes_ARID4B:                    | 190 in gene              | 1 | 20.000 | 1 | 1_Testes_ARID4B: |
| 1_Testes_ARID4B:                    | -2535 upstream           | 1 | 20.000 | 1 | 1_Testes_ARID4B: |

|                                |                      |   |        |   |                  |
|--------------------------------|----------------------|---|--------|---|------------------|
| 1_Testes_ARID4B:               | -9867 upstream       | 1 | 20.000 | 1 | 1_Testes_ARID4B: |
| 1_Testes_ARID4B:               | 463 in gene          | 1 | 21.000 | 1 | 1_Testes_ARID4B: |
| 1_Testes_ARID4B:               | 439 in gene          | 1 | 24.000 | 1 | 1_Testes_ARID4B: |
| 1_Testes_ARID4B:               | 67279 downstream     | 1 | 24.000 | 1 | 1_Testes_ARID4B: |
| 1_Testes_ARID4B:               | 125 in gene          | 1 | 22.000 | 1 | 1_Testes_ARID4B: |
| 1_Testes_ARID4B:               | -6295 upstream       | 1 | 22.000 | 1 | 1_Testes_ARID4B: |
| 1_Testes_ARID4B:               | -6468 upstream       | 1 | 16.000 | 1 | 1_Testes_ARID4B: |
| 1_Testes_ARID4B:               | 457 in gene          | 1 | 16.000 | 1 | 1_Testes_ARID4B: |
| 1_Testes_ARID4B:               | 10864 downstream     | 1 | 16.000 | 1 | 1_Testes_ARID4B: |
| 1_Testes_ARID4B:               | 21352 downstream     | 1 | 20.000 | 1 | 1_Testes_ARID4B: |
| 1_Testes_ARID4B:               | 558 in gene          | 1 | 29.000 | 1 | 1_Testes_ARID4B: |
| 1_Testes_ARID4B: 29436, 34540  | downstream, downstre | 1 | 27.500 | 2 | 1_Testes_ARID4B: |
| 1_Testes_ARID4B: 527, -4577    | in gene, upstream    | 1 | 27.500 | 2 | 1_Testes_ARID4B: |
| 1_Testes_ARID4B: 9970, 4866    | downstream, in gene  | 1 | 27.500 | 2 | 1_Testes_ARID4B: |
| 1_Testes_ARID4B: -10024, -4920 | upstream, upstream   | 1 | 27.500 | 2 | 1_Testes_ARID4B: |
| 1_Testes_ARID4B:               | -10073 upstream      | 1 | 23.000 | 1 | 1_Testes_ARID4B: |
| 1_Testes_ARID4B:               | 13729 downstream     | 1 | 35.000 | 1 | 1_Testes_ARID4B: |
| 1_Testes_ARID4B: -648, -8456   | upstream, upstream   | 1 | 28.500 | 2 | 1_Testes_ARID4B: |
| 1_Testes_ARID4B: 5922, -1886   | in gene, upstream    | 1 | 28.500 | 2 | 1_Testes_ARID4B: |
| 1_Testes_ARID4B: -7487, 321    | upstream, in gene    | 1 | 28.500 | 2 | 1_Testes_ARID4B: |
| 1_Testes_ARID4B:               | -7617 upstream       | 1 | 22.000 | 1 | 1_Testes_ARID4B: |
| 1_Testes_ARID4B:               | 10476 downstream     | 1 | 22.000 | 1 | 1_Testes_ARID4B: |
| 1_Testes_ARID4B: 1202, 173     | in gene, in gene     | 1 | 19.000 | 2 | 1_Testes_ARID4B: |
| 1_Testes_ARID4B: -1490, -461   | upstream, upstream   | 1 | 19.000 | 2 | 1_Testes_ARID4B: |
| 1_Testes_ARID4B:               | -58 upstream         | 1 | 40.000 | 1 | 1_Testes_ARID4B: |
| 1_Testes_ARID4B:               | 328 in gene          | 1 | 22.000 | 1 | 1_Testes_ARID4B: |
| 1_Testes_ARID4B:               | 2586 downstream      | 1 | 22.000 | 1 | 1_Testes_ARID4B: |
| 1_Testes_ARID4B: 115, 15211    | in gene, in gene     | 1 | 22.500 | 2 | 1_Testes_ARID4B: |
| 1_Testes_ARID4B: -10122, 4974  | upstream, downstream | 1 | 22.500 | 2 | 1_Testes_ARID4B: |
| 1_Testes_ARID4B: 17438, 566    | downstream, in gene  | 1 | 22.500 | 2 | 1_Testes_ARID4B: |
| 1_Testes_ARID4B:               | 774 in gene          | 1 | 26.000 | 1 | 1_Testes_ARID4B: |
| 1_Testes_ARID4B:               | 9590 downstream      | 1 | 18.000 | 1 | 1_Testes_ARID4B: |
| 1_Testes_ARID4B:               | 599 in gene          | 1 | 18.000 | 1 | 1_Testes_ARID4B: |
| 1_Testes_ARID4B:               | -658 upstream        | 1 | 18.000 | 1 | 1_Testes_ARID4B: |
| 1_Testes_ARID4B:               | 7672 downstream      | 1 | 18.000 | 1 | 1_Testes_ARID4B: |
| 1_Testes_ARID4B:               | -7807 upstream       | 1 | 18.000 | 1 | 1_Testes_ARID4B: |
| 1_Testes_ARID4B:               | 175 in gene          | 1 | 33.000 | 1 | 1_Testes_ARID4B: |
| 1_Testes_ARID4B:               | 68918 downstream     | 1 | 33.000 | 1 | 1_Testes_ARID4B: |
| 1_Testes_ARID4B:               | -8696 upstream       | 1 | 30.000 | 1 | 1_Testes_ARID4B: |
| 1_Testes_ARID4B:               | 5601 downstream      | 1 | 30.000 | 1 | 1_Testes_ARID4B: |
| 1_Testes_ARID4B:               | 70 in gene           | 1 | 30.000 | 1 | 1_Testes_ARID4B: |
| 1_Testes_ARID4B:               | 227 in gene          | 1 | 36.000 | 1 | 1_Testes_ARID4B: |
| 1_Testes_ARID4B:               | 13531 downstream     | 1 | 36.000 | 1 | 1_Testes_ARID4B: |
| 1_Testes_ARID4B:               | 48397 downstream     | 1 | 37.000 | 1 | 1_Testes_ARID4B: |
| 1_Testes_ARID4B: 301, 77261    | in gene, downstream  | 1 | 31.000 | 2 | 1_Testes_ARID4B: |
| 1_Testes_ARID4B:               | 110 in gene          | 1 | 25.000 | 1 | 1_Testes_ARID4B: |
| 1_Testes_ARID4B:               | 1464 in gene         | 1 | 25.000 | 1 | 1_Testes_ARID4B: |



|                                      |                          |   |        |   |                  |
|--------------------------------------|--------------------------|---|--------|---|------------------|
| 1_Testes_ARID4B:                     | 18593 downstream         | 1 | 34.000 | 1 | 1_Testes_ARID4B: |
| 1_Testes_ARID4B:                     | 117 in gene              | 1 | 34.000 | 1 | 1_Testes_ARID4B: |
| 1_Testes_ARID4B:                     | 21 in gene               | 1 | 26.000 | 1 | 1_Testes_ARID4B: |
| 1_Testes_ARID4B:                     | -142 upstream            | 1 | 26.000 | 1 | 1_Testes_ARID4B: |
| 1_Testes_ARID4B:                     | -9007 upstream           | 1 | 20.000 | 1 | 1_Testes_ARID4B: |
| 1_Testes_ARID4B:                     | 197 in gene              | 1 | 20.000 | 1 | 1_Testes_ARID4B: |
| 1_Testes_ARID4B:                     | 16185 downstream         | 1 | 29.000 | 1 | 1_Testes_ARID4B: |
| 1_Testes_ARID4B:                     | -40 upstream             | 1 | 29.000 | 1 | 1_Testes_ARID4B: |
| 1_Testes_ARID4B:                     | 132 in gene              | 1 | 27.000 | 1 | 1_Testes_ARID4B: |
| 1_Testes_ARID4B: 542, 23550          | in gene, downstream      | 1 | 25.500 | 2 | 1_Testes_ARID4B: |
| 1_Testes_ARID4B:                     | -199 upstream            | 1 | 31.000 | 1 | 1_Testes_ARID4B: |
| 1_Testes_ARID4B:                     | 152 in gene              | 1 | 31.000 | 1 | 1_Testes_ARID4B: |
| 1_Testes_ARID4B:                     | 570 in gene              | 1 | 35.000 | 1 | 1_Testes_ARID4B: |
| 1_Testes_ARID4B: 66, 17090           | in gene, downstream      | 1 | 35.500 | 2 | 1_Testes_ARID4B: |
| 1_Testes_ARID4B: 198, -7738          | in gene, upstream        | 1 | 32.000 | 2 | 1_Testes_ARID4B: |
| 1_Testes_ARID4B: 8321, 385           | downstream, in gene      | 1 | 32.000 | 2 | 1_Testes_ARID4B: |
| 1_Testes_ARID4B: -8461, -525         | upstream, upstream       | 1 | 32.000 | 2 | 1_Testes_ARID4B: |
| 1_Testes_ARID4B:                     | 9292 downstream          | 1 | 30.000 | 1 | 1_Testes_ARID4B: |
| 1_Testes_ARID4B:                     | 321 in gene              | 1 | 17.000 | 1 | 1_Testes_ARID4B: |
| 1_Testes_ARID4B:                     | 226 in gene              | 1 | 36.000 | 1 | 1_Testes_ARID4B: |
| 1_Testes_ARID4B:                     | 354 in gene              | 1 | 42.000 | 1 | 1_Testes_ARID4B: |
| 1_Testes_ARID4B:                     | 636 in gene              | 1 | 19.000 | 1 | 1_Testes_ARID4B: |
| 1_Testes_ARID4B:                     | -50 upstream             | 1 | 31.000 | 1 | 1_Testes_ARID4B: |
| 1_Testes_ARID4B: 208, 90459          | in gene, downstream      | 1 | 24.500 | 2 | 1_Testes_ARID4B: |
| 1_Testes_ARID4B:                     | 496 in gene              | 1 | 18.000 | 1 | 1_Testes_ARID4B: |
| 1_Testes_ARID4B:                     | 10 in gene               | 1 | 21.000 | 1 | 1_Testes_ARID4B: |
| 1_Testes_ARID4B:                     | 351647 downstream        | 1 | 38.000 | 1 | 1_Testes_ARID4B: |
| 1_Testes_ARID4B:                     | -14 upstream             | 1 | 38.000 | 1 | 1_Testes_ARID4B: |
| 1_Testes_ARID4B:                     | 243 in gene              | 1 | 29.000 | 1 | 1_Testes_ARID4B: |
| 1_Testes_ARID4B:                     | -7962 upstream           | 1 | 29.000 | 1 | 1_Testes_ARID4B: |
| 1_Testes_ARID4B:                     | -464 upstream            | 1 | 29.000 | 1 | 1_Testes_ARID4B: |
| 1_Testes_ARID4B:                     | 444 in gene              | 1 | 18.000 | 1 | 1_Testes_ARID4B: |
| 1_Testes_ARID4B:                     | 22385 in gene            | 1 | 47.000 | 1 | 1_Testes_ARID4B: |
| 1_Testes_ARID4B:                     | 13 in gene               | 1 | 47.000 | 1 | 1_Testes_ARID4B: |
| 1_Testes_ARID4B:                     | -281 upstream            | 1 | 24.000 | 1 | 1_Testes_ARID4B: |
| 1_Testes_ARID4B:                     | 386 in gene              | 1 | 38.000 | 1 | 1_Testes_ARID4B: |
| 1_Testes_ARID4B:                     | 222 in gene              | 1 | 31.000 | 1 | 1_Testes_ARID4B: |
| 1_Testes_ARID4B:                     | 112 in gene              | 1 | 29.000 | 1 | 1_Testes_ARID4B: |
| 1_Testes_ARID4B:                     | 285 in gene              | 1 | 25.000 | 1 | 1_Testes_ARID4B: |
| 1_Testes_ARID4B: 29817, 26985, 12729 | in gene, in gene, in gen | 1 | 20.667 | 3 | 1_Testes_ARID4B: |
| 1_Testes_ARID4B:                     | 358 in gene              | 1 | 23.000 | 1 | 1_Testes_ARID4B: |
| 1_Testes_ARID4B:                     | 19863 in gene            | 1 | 26.000 | 1 | 1_Testes_ARID4B: |
| 1_Testes_ARID4B: 159, -7281          | in gene, upstream        | 1 | 29.500 | 2 | 1_Testes_ARID4B: |
| 1_Testes_ARID4B: -7071, 369          | upstream, in gene        | 1 | 29.500 | 2 | 1_Testes_ARID4B: |
| 1_Testes_ARID4B:                     | -247 upstream            | 1 | 27.000 | 1 | 1_Testes_ARID4B: |
| 1_Testes_ARID4B:                     | 193 in gene              | 1 | 27.000 | 1 | 1_Testes_ARID4B: |
| 1_Testes_ARID4B:                     | 1006 in gene             | 1 | 34.000 | 1 | 1_Testes_ARID4B: |

|                                         |                          |   |        |   |                  |
|-----------------------------------------|--------------------------|---|--------|---|------------------|
| 1_Testes_ARID4B:                        | -1 upstream              | 1 | 26.000 | 1 | 1_Testes_ARID4B: |
| 1_Testes_ARID4B:                        | -388 upstream            | 1 | 34.000 | 1 | 1_Testes_ARID4B: |
| 1_Testes_ARID4B: 84, 21972              | in gene, downstream      | 1 | 33.000 | 2 | 1_Testes_ARID4B: |
| 1_Testes_ARID4B:                        | 319 in gene              | 1 | 32.000 | 1 | 1_Testes_ARID4B: |
| 1_Testes_ARID4B:                        | 105 in gene              | 1 | 27.000 | 1 | 1_Testes_ARID4B: |
| 1_Testes_ARID4B:                        | 89105 downstream         | 1 | 27.000 | 1 | 1_Testes_ARID4B: |
| 1_Testes_ARID4B:                        | 137 in gene              | 1 | 39.000 | 1 | 1_Testes_ARID4B: |
| 1_Testes_ARID4B:                        | 261 in gene              | 1 | 41.000 | 1 | 1_Testes_ARID4B: |
| 1_Testes_ARID4B:                        | 137 in gene              | 1 | 18.000 | 1 | 1_Testes_ARID4B: |
| 1_Testes_ARID4B:                        | -310 upstream            | 1 | 18.000 | 1 | 1_Testes_ARID4B: |
| 1_Testes_ARID4B:                        | 468 in gene              | 1 | 23.000 | 1 | 1_Testes_ARID4B: |
| 1_Testes_ARID4B:                        | 384 in gene              | 1 | 25.000 | 1 | 1_Testes_ARID4B: |
| 1_Testes_ARID4B: -419, 29789            | upstream, downstream     | 1 | 21.500 | 2 | 1_Testes_ARID4B: |
| 1_Testes_ARID4B:                        | 216 in gene              | 1 | 18.000 | 1 | 1_Testes_ARID4B: |
| 1_Testes_ARID4B:                        | -2399 upstream           | 1 | 18.000 | 1 | 1_Testes_ARID4B: |
| 1_Testes_ARID4B:                        | -7723 upstream           | 1 | 18.000 | 1 | 1_Testes_ARID4B: |
| 1_Testes_ARID4B:                        | 63 in gene               | 1 | 36.000 | 1 | 1_Testes_ARID4B: |
| 1_Testes_ARID4B:                        | 12 in gene               | 1 | 30.000 | 1 | 1_Testes_ARID4B: |
| 1_Testes_ARID4B:                        | 192 in gene              | 1 | 20.000 | 1 | 1_Testes_ARID4B: |
| 1_Testes_ARID4B:                        | -24 upstream             | 1 | 21.000 | 1 | 1_Testes_ARID4B: |
| 1_Testes_ARID4B: -1026, 31646, 48446, 8 | upstream, in gene, in g  | 1 | 22.750 | 4 | 1_Testes_ARID4B: |
| 1_Testes_ARID4B:                        | 240 in gene              | 1 | 40.000 | 1 | 1_Testes_ARID4B: |
| 1_Testes_ARID4B:                        | -418 upstream            | 1 | 40.000 | 1 | 1_Testes_ARID4B: |
| 1_Testes_ARID4B:                        | -8933 upstream           | 1 | 30.000 | 1 | 1_Testes_ARID4B: |
| 1_Testes_ARID4B: 1141, 12021            | in gene, downstream      | 1 | 24.500 | 2 | 1_Testes_ARID4B: |
| 1_Testes_ARID4B: -10373, 507            | upstream, in gene        | 1 | 24.500 | 2 | 1_Testes_ARID4B: |
| 1_Testes_ARID4B: -67, -1411             | upstream, upstream       | 1 | 28.500 | 2 | 1_Testes_ARID4B: |
| 1_Testes_ARID4B:                        | 161 in gene              | 1 | 25.000 | 1 | 1_Testes_ARID4B: |
| 1_Testes_ARID4B:                        | 262 in gene              | 1 | 55.000 | 1 | 1_Testes_ARID4B: |
| 1_Testes_ARID4B: -409, 15879            | upstream, downstream     | 1 | 36.500 | 2 | 1_Testes_ARID4B: |
| 1_Testes_ARID4B: 37488, 21200, -6224    | downstream, in gene, u   | 1 | 33.667 | 3 | 1_Testes_ARID4B: |
| 1_Testes_ARID4B:                        | 603 in gene              | 1 | 28.000 | 1 | 1_Testes_ARID4B: |
| 1_Testes_ARID4B:                        | 23069 downstream         | 1 | 26.000 | 1 | 1_Testes_ARID4B: |
| 1_Testes_ARID4B: 995, 2243, 54979       | in gene, in gene, in gen | 1 | 25.333 | 3 | 1_Testes_ARID4B: |
| 1_Testes_ARID4B:                        | 72 in gene               | 1 | 28.000 | 1 | 1_Testes_ARID4B: |
| 1_Testes_ARID4B:                        | -288 upstream            | 1 | 25.000 | 1 | 1_Testes_ARID4B: |
| 1_Testes_ARID4B:                        | 209 in gene              | 1 | 25.000 | 1 | 1_Testes_ARID4B: |
| 1_Testes_ARID4B: 74977, 417             | downstream, in gene      | 1 | 28.500 | 2 | 1_Testes_ARID4B: |
| 1_Testes_ARID4B: 145, 8753              | in gene, downstream      | 1 | 26.000 | 2 | 1_Testes_ARID4B: |
| 1_Testes_ARID4B: 8747, 139              | downstream, in gene      | 1 | 26.000 | 2 | 1_Testes_ARID4B: |
| 1_Testes_ARID4B: 43327, 34719           | downstream, downstre     | 1 | 26.000 | 2 | 1_Testes_ARID4B: |
| 1_Testes_ARID4B:                        | 20549 in gene            | 1 | 30.000 | 1 | 1_Testes_ARID4B: |
| 1_Testes_ARID4B:                        | 652 in gene              | 1 | 29.000 | 1 | 1_Testes_ARID4B: |
| 1_Testes_ARID4B:                        | -943 upstream            | 1 | 29.000 | 1 | 1_Testes_ARID4B: |
| 1_Testes_ARID4B: 220, 37116             | in gene, downstream      | 1 | 44.500 | 2 | 1_Testes_ARID4B: |
| 1_Testes_ARID4B:                        | 274 in gene              | 1 | 68.000 | 1 | 1_Testes_ARID4B: |
| 1_Testes_ARID4B:                        | -434 upstream            | 1 | 68.000 | 1 | 1_Testes_ARID4B: |

|                                         |                        |   |        |   |                  |
|-----------------------------------------|------------------------|---|--------|---|------------------|
| 1_Testes_ARID4B:                        | 132 in gene            | 1 | 22.000 | 1 | 1_Testes_ARID4B: |
| 1_Testes_ARID4B:                        | 6125 downstream        | 1 | 22.000 | 1 | 1_Testes_ARID4B: |
| 1_Testes_ARID4B: -202, 12054            | upstream, downstream   | 1 | 24.000 | 2 | 1_Testes_ARID4B: |
| 1_Testes_ARID4B: 71, 10871              | in gene, downstream    | 1 | 23.000 | 2 | 1_Testes_ARID4B: |
| 1_Testes_ARID4B: 11297, 497             | downstream, in gene    | 1 | 23.000 | 2 | 1_Testes_ARID4B: |
| 1_Testes_ARID4B: -10179, 621            | upstream, in gene      | 1 | 23.000 | 2 | 1_Testes_ARID4B: |
| 1_Testes_ARID4B: 18463, -513            | downstream, upstream   | 1 | 26.500 | 2 | 1_Testes_ARID4B: |
| 1_Testes_ARID4B:                        | 493 in gene            | 1 | 33.000 | 1 | 1_Testes_ARID4B: |
| 1_Testes_ARID4B: 247, 40983             | in gene, downstream    | 1 | 26.000 | 2 | 1_Testes_ARID4B: |
| 1_Testes_ARID4B:                        | -57 upstream           | 1 | 29.000 | 1 | 1_Testes_ARID4B: |
| 1_Testes_ARID4B:                        | 186 in gene            | 1 | 34.000 | 1 | 1_Testes_ARID4B: |
| 1_Testes_ARID4B:                        | 407 in gene            | 1 | 20.000 | 1 | 1_Testes_ARID4B: |
| 1_Testes_ARID4B:                        | 369 in gene            | 1 | 24.000 | 1 | 1_Testes_ARID4B: |
| 1_Testes_ARID4B:                        | -271 upstream          | 1 | 24.000 | 1 | 1_Testes_ARID4B: |
| 1_Testes_ARID4B: 33586, 477             | downstream, in gene    | 1 | 23.000 | 2 | 1_Testes_ARID4B: |
| 1_Testes_ARID4B:                        | 510 in gene            | 1 | 24.000 | 1 | 1_Testes_ARID4B: |
| 1_Testes_ARID4B:                        | 80 in gene             | 1 | 20.000 | 1 | 1_Testes_ARID4B: |
| 1_Testes_ARID4B:                        | 49 in gene             | 1 | 32.000 | 1 | 1_Testes_ARID4B: |
| 1_Testes_ARID4B:                        | 377 in gene            | 1 | 21.000 | 1 | 1_Testes_ARID4B: |
| 1_Testes_ARID4B:                        | 58983 downstream       | 1 | 21.000 | 1 | 1_Testes_ARID4B: |
| 1_Testes_ARID4B:                        | 1765 in gene           | 1 | 21.000 | 1 | 1_Testes_ARID4B: |
| 1_Testes_ARID4B:                        | -123 upstream          | 1 | 37.000 | 1 | 1_Testes_ARID4B: |
| 1_Testes_ARID4B: 119, 35111             | in gene, downstream    | 1 | 39.000 | 2 | 1_Testes_ARID4B: |
| 1_Testes_ARID4B:                        | -439 upstream          | 1 | 41.000 | 1 | 1_Testes_ARID4B: |
| 1_Testes_ARID4B:                        | 258 in gene            | 1 | 41.000 | 1 | 1_Testes_ARID4B: |
| 1_Testes_ARID4B: 51110, 806             | downstream, in gene    | 1 | 40.500 | 2 | 1_Testes_ARID4B: |
| 1_Testes_ARID4B:                        | 123 in gene            | 1 | 34.000 | 1 | 1_Testes_ARID4B: |
| 1_Testes_ARID4B: 231, -537              | in gene, upstream      | 1 | 22.000 | 2 | 1_Testes_ARID4B: |
| 1_Testes_ARID4B:                        | 102 in gene            | 1 | 31.000 | 1 | 1_Testes_ARID4B: |
| 1_Testes_ARID4B:                        | 638 in gene            | 1 | 33.000 | 1 | 1_Testes_ARID4B: |
| 1_Testes_ARID4B:                        | -35 upstream           | 1 | 21.000 | 1 | 1_Testes_ARID4B: |
| 1_Testes_ARID4B:                        | 187 in gene            | 1 | 35.000 | 1 | 1_Testes_ARID4B: |
| 1_Testes_ARID4B: 52377, 281             | downstream, in gene    | 1 | 28.500 | 2 | 1_Testes_ARID4B: |
| 1_Testes_ARID4B: 8988, 3276, 284, -1380 | downstream, in gene, i | 1 | 33.250 | 4 | 1_Testes_ARID4B: |
| 1_Testes_ARID4B:                        | 360 in gene            | 1 | 25.000 | 1 | 1_Testes_ARID4B: |
| 1_Testes_ARID4B:                        | 447 in gene            | 1 | 21.000 | 1 | 1_Testes_ARID4B: |
| 1_Testes_ARID4B:                        | 279 downstream         | 1 | 21.000 | 1 | 1_Testes_ARID4B: |
| 1_Testes_ARID4B:                        | 51 in gene             | 1 | 18.000 | 1 | 1_Testes_ARID4B: |
| 1_Testes_ARID4B:                        | -7882 upstream         | 1 | 29.000 | 1 | 1_Testes_ARID4B: |
| 1_Testes_ARID4B:                        | 362 in gene            | 1 | 29.000 | 1 | 1_Testes_ARID4B: |
| 1_Testes_ARID4B:                        | 147 in gene            | 1 | 24.000 | 1 | 1_Testes_ARID4B: |
| 1_Testes_ARID4B:                        | 468 in gene            | 1 | 30.000 | 1 | 1_Testes_ARID4B: |
| 1_Testes_ARID4B:                        | 1895 in gene           | 1 | 18.000 | 1 | 1_Testes_ARID4B: |
| 1_Testes_ARID4B:                        | 101 in gene            | 1 | 32.000 | 1 | 1_Testes_ARID4B: |
| 1_Testes_ARID4B:                        | 2624 in gene           | 1 | 32.000 | 1 | 1_Testes_ARID4B: |
| 1_Testes_ARID4B:                        | -221 upstream          | 1 | 32.000 | 1 | 1_Testes_ARID4B: |
| 1_Testes_ARID4B:                        | -399 upstream          | 1 | 32.000 | 1 | 1_Testes_ARID4B: |

|                                    |                          |   |        |   |                  |
|------------------------------------|--------------------------|---|--------|---|------------------|
| 1_Testes_ARID4B:                   | 275 in gene              | 1 | 26.000 | 1 | 1_Testes_ARID4B: |
| 1_Testes_ARID4B:                   | 458 in gene              | 1 | 30.000 | 1 | 1_Testes_ARID4B: |
| 1_Testes_ARID4B:                   | -318 upstream            | 1 | 16.000 | 1 | 1_Testes_ARID4B: |
| 1_Testes_ARID4B:                   | 181 in gene              | 1 | 16.000 | 1 | 1_Testes_ARID4B: |
| 1_Testes_ARID4B:                   | 34 in gene               | 1 | 20.000 | 1 | 1_Testes_ARID4B: |
| 1_Testes_ARID4B:                   | 70 in gene               | 1 | 24.000 | 1 | 1_Testes_ARID4B: |
| 1_Testes_ARID4B:                   | 66700 downstream         | 1 | 24.000 | 1 | 1_Testes_ARID4B: |
| 1_Testes_ARID4B:                   | 144 in gene              | 1 | 25.000 | 1 | 1_Testes_ARID4B: |
| 1_Testes_ARID4B:                   | 90 in gene               | 1 | 25.000 | 1 | 1_Testes_ARID4B: |
| 1_Testes_ARID4B:                   | 156 in gene              | 1 | 23.000 | 1 | 1_Testes_ARID4B: |
| 1_Testes_ARID4B:                   | 167 in gene              | 1 | 16.000 | 1 | 1_Testes_ARID4B: |
| 1_Testes_ARID4B:                   | -86 upstream             | 1 | 21.000 | 1 | 1_Testes_ARID4B: |
| 1_Testes_ARID4B: 28587, 187        | downstream, in gene      | 1 | 20.000 | 2 | 1_Testes_ARID4B: |
| 1_Testes_ARID4B: 1407, -7457       | in gene, upstream        | 1 | 22.000 | 2 | 1_Testes_ARID4B: |
| 1_Testes_ARID4B: 42, 8906          | in gene, downstream      | 1 | 22.000 | 2 | 1_Testes_ARID4B: |
| 1_Testes_ARID4B: -8770, 94         | upstream, in gene        | 1 | 22.000 | 2 | 1_Testes_ARID4B: |
| 1_Testes_ARID4B:                   | -34 upstream             | 1 | 20.000 | 1 | 1_Testes_ARID4B: |
| 1_Testes_ARID4B: 11102, -8738      | downstream, upstream     | 1 | 32.000 | 2 | 1_Testes_ARID4B: |
| 1_Testes_ARID4B: 273, 3281, 10161  | in gene, in gene, downst | 1 | 29.333 | 3 | 1_Testes_ARID4B: |
| 1_Testes_ARID4B: 10142, 7134, 254  | downstream, downstre     | 1 | 29.333 | 3 | 1_Testes_ARID4B: |
| 1_Testes_ARID4B:                   | 61552 downstream         | 1 | 22.000 | 1 | 1_Testes_ARID4B: |
| 1_Testes_ARID4B:                   | 281 in gene              | 1 | 36.000 | 1 | 1_Testes_ARID4B: |
| 1_Testes_ARID4B:                   | 143 in gene              | 1 | 22.000 | 1 | 1_Testes_ARID4B: |
| 1_Testes_ARID4B: 17096, 21704      | downstream, downstre     | 1 | 27.000 | 2 | 1_Testes_ARID4B: |
| 1_Testes_ARID4B: 3683, 8291        | downstream, downstre     | 1 | 27.000 | 2 | 1_Testes_ARID4B: |
| 1_Testes_ARID4B: 1018, 5626        | in gene, in gene         | 1 | 27.000 | 2 | 1_Testes_ARID4B: |
| 1_Testes_ARID4B: -728, -5336       | upstream, upstream       | 1 | 27.000 | 2 | 1_Testes_ARID4B: |
| 1_Testes_ARID4B: 4726, 118         | downstream, in gene      | 1 | 27.000 | 2 | 1_Testes_ARID4B: |
| 1_Testes_ARID4B:                   | -6347 upstream           | 1 | 29.000 | 1 | 1_Testes_ARID4B: |
| 1_Testes_ARID4B: 18568, 168        | in gene, in gene         | 1 | 25.500 | 2 | 1_Testes_ARID4B: |
| 1_Testes_ARID4B:                   | 74 in gene               | 1 | 29.000 | 1 | 1_Testes_ARID4B: |
| 1_Testes_ARID4B: 18548, 148        | downstream, in gene      | 1 | 25.500 | 2 | 1_Testes_ARID4B: |
| 1_Testes_ARID4B:                   | -626 upstream            | 1 | 21.000 | 1 | 1_Testes_ARID4B: |
| 1_Testes_ARID4B: 8485, 13221       | downstream, downstre     | 1 | 20.500 | 2 | 1_Testes_ARID4B: |
| 1_Testes_ARID4B: 5476, 740, -5308  | in gene, in gene, upstre | 1 | 19.667 | 3 | 1_Testes_ARID4B: |
| 1_Testes_ARID4B: 14587, 9851, 3803 | downstream, downstre     | 1 | 19.667 | 3 | 1_Testes_ARID4B: |
| 1_Testes_ARID4B:                   | 43837 downstream         | 1 | 26.000 | 1 | 1_Testes_ARID4B: |
| 1_Testes_ARID4B:                   | -120 upstream            | 1 | 26.000 | 1 | 1_Testes_ARID4B: |
| 1_Testes_ARID4B: 3, 13299          | in gene, downstream      | 1 | 25.500 | 2 | 1_Testes_ARID4B: |
| 1_Testes_ARID4B:                   | 228 in gene              | 1 | 25.000 | 1 | 1_Testes_ARID4B: |
| 1_Testes_ARID4B:                   | -3000 upstream           | 1 | 29.000 | 1 | 1_Testes_ARID4B: |
| 1_Testes_ARID4B:                   | 407 in gene              | 1 | 29.000 | 1 | 1_Testes_ARID4B: |
| 1_Testes_ARID4B:                   | 168 in gene              | 1 | 18.000 | 1 | 1_Testes_ARID4B: |
| 1_Testes_ARID4B: 3442, -270        | in gene, upstream        | 1 | 24.000 | 2 | 1_Testes_ARID4B: |
| 1_Testes_ARID4B: 57531, 53819, 134 | downstream, downstre     | 1 | 26.000 | 3 | 1_Testes_ARID4B: |
| 1_Testes_ARID4B:                   | 5015 downstream          | 1 | 17.000 | 1 | 1_Testes_ARID4B: |
| 1_Testes_ARID4B:                   | 2808 in gene             | 1 | 17.000 | 1 | 1_Testes_ARID4B: |

|                            |                  |   |        |   |                  |
|----------------------------|------------------|---|--------|---|------------------|
| 1_Testes_ARID4B:           | 177 in gene      | 1 | 24.000 | 1 | 1_Testes_ARID4B: |
| 1_Testes_ARID4B:           | 166 in gene      | 1 | 24.000 | 1 | 1_Testes_ARID4B: |
| 1_Testes_ARID4B:           | 14259 downstream | 1 | 24.000 | 1 | 1_Testes_ARID4B: |
| 1_Testes_ARID4B:           | 17707 downstream | 1 | 22.000 | 1 | 1_Testes_ARID4B: |
| 1_Testes_ARID4B:           | -2791 upstream   | 1 | 22.000 | 1 | 1_Testes_ARID4B: |
| 1_Testes_ARID4B:           | 18786 downstream | 1 | 22.000 | 1 | 1_Testes_ARID4B: |
| 1_Testes_ARID4B:           | 278 in gene      | 1 | 31.000 | 1 | 1_Testes_ARID4B: |
| 1_Testes_ARID4B:           | 420 in gene      | 1 | 26.000 | 1 | 1_Testes_ARID4B: |
| 1_Testes_ARID4B:           | -7779 upstream   | 1 | 26.000 | 1 | 1_Testes_ARID4B: |
| 1_Testes_ARID4B:           | 581 in gene      | 1 | 32.000 | 1 | 1_Testes_ARID4B: |
| 1_Testes_ARID4B:           | 41 in gene       | 1 | 29.000 | 1 | 1_Testes_ARID4B: |
| 1_Testes_ARID4B:           | 190 in gene      | 1 | 39.000 | 1 | 1_Testes_ARID4B: |
| 1_Testes_ARID4B:           | -271 upstream    | 1 | 39.000 | 1 | 1_Testes_ARID4B: |
| 1_Testes_ARID4B:           | -257 upstream    | 1 | 26.000 | 1 | 1_Testes_ARID4B: |
| 1_Testes_ARID4B:           | 421 in gene      | 1 | 20.000 | 1 | 1_Testes_ARID4B: |
| 1_Testes_ARID4B:           | 140 in gene      | 1 | 20.000 | 1 | 1_Testes_ARID4B: |
| 1_Testes_ARID4B:           | 55 in gene       | 1 | 17.000 | 1 | 1_Testes_ARID4B: |
| 1_Testes_ARID4B:           | 231 in gene      | 1 | 36.000 | 1 | 1_Testes_ARID4B: |
| 1_Testes_ARID4B:           | -266 upstream    | 1 | 23.000 | 1 | 1_Testes_ARID4B: |
| 1_Testes_ARID4B:           | 202 in gene      | 1 | 30.000 | 1 | 1_Testes_ARID4B: |
| 1_Testes_ARID4B:           | -120 upstream    | 1 | 30.000 | 1 | 1_Testes_ARID4B: |
| 1_Testes_ARID4B:           | 59379 downstream | 1 | 30.000 | 1 | 1_Testes_ARID4B: |
| 1_Testes_ARID4B:           | -435 upstream    | 1 | 27.000 | 1 | 1_Testes_ARID4B: |
| 1_Testes_ARID4B:           | 157 in gene      | 1 | 27.000 | 1 | 1_Testes_ARID4B: |
| 1_Testes_ARID4B:           | 56420 downstream | 1 | 27.000 | 1 | 1_Testes_ARID4B: |
| 1_Testes_ARID4B:           | 10934 downstream | 1 | 24.000 | 1 | 1_Testes_ARID4B: |
| 1_Testes_ARID4B:           | -331 upstream    | 1 | 24.000 | 1 | 1_Testes_ARID4B: |
| 1_Testes_ARID4B:           | 4265 downstream  | 1 | 24.000 | 1 | 1_Testes_ARID4B: |
| 1_Testes_ARID4B:           | -94 upstream     | 1 | 18.000 | 1 | 1_Testes_ARID4B: |
| 1_Testes_ARID4B:           | 40826 downstream | 1 | 18.000 | 1 | 1_Testes_ARID4B: |
| 1_Testes_ARID4B:           | 337 in gene      | 1 | 24.000 | 1 | 1_Testes_ARID4B: |
| 1_Testes_ARID4B: 1938, 802 | in gene, in gene | 1 | 23.500 | 2 | 1_Testes_ARID4B: |
| 1_Testes_ARID4B:           | 17130 in gene    | 1 | 21.000 | 1 | 1_Testes_ARID4B: |
| 1_Testes_ARID4B:           | -169 upstream    | 1 | 25.000 | 1 | 1_Testes_ARID4B: |
| 1_Testes_ARID4B:           | 5241 downstream  | 1 | 29.000 | 1 | 1_Testes_ARID4B: |
| 1_Testes_ARID4B:           | 4 in gene        | 1 | 29.000 | 1 | 1_Testes_ARID4B: |
| 1_Testes_ARID4B:           | 52 in gene       | 1 | 25.000 | 1 | 1_Testes_ARID4B: |
| 1_Testes_ARID4B:           | 404 in gene      | 1 | 22.000 | 1 | 1_Testes_ARID4B: |
| 1_Testes_ARID4B:           | 183 in gene      | 1 | 30.000 | 1 | 1_Testes_ARID4B: |
| 1_Testes_ARID4B:           | -2127 upstream   | 1 | 30.000 | 1 | 1_Testes_ARID4B: |
| 1_Testes_ARID4B:           | -2539 upstream   | 1 | 30.000 | 1 | 1_Testes_ARID4B: |
| 1_Testes_ARID4B:           | -3292 upstream   | 1 | 30.000 | 1 | 1_Testes_ARID4B: |
| 1_Testes_ARID4B:           | 182 in gene      | 1 | 26.000 | 1 | 1_Testes_ARID4B: |
| 1_Testes_ARID4B:           | 54 in gene       | 1 | 20.000 | 1 | 1_Testes_ARID4B: |
| 1_Testes_ARID4B:           | -5319 upstream   | 1 | 20.000 | 1 | 1_Testes_ARID4B: |
| 1_Testes_ARID4B:           | 10906 downstream | 1 | 20.000 | 1 | 1_Testes_ARID4B: |
| 1_Testes_ARID4B:           | 536 in gene      | 1 | 22.000 | 1 | 1_Testes_ARID4B: |

|                                   |                          |   |        |   |                  |
|-----------------------------------|--------------------------|---|--------|---|------------------|
| 1_Testes_ARID4B:                  | -528 upstream            | 1 | 29.000 | 1 | 1_Testes_ARID4B: |
| 1_Testes_ARID4B:                  | 168 in gene              | 1 | 17.000 | 1 | 1_Testes_ARID4B: |
| 1_Testes_ARID4B:                  | 6854 in gene             | 1 | 16.000 | 1 | 1_Testes_ARID4B: |
| 1_Testes_ARID4B:                  | 6854 in gene             | 1 | 16.000 | 1 | 1_Testes_ARID4B: |
| 1_Testes_ARID4B:                  | 4427 downstream          | 1 | 16.000 | 1 | 1_Testes_ARID4B: |
| 1_Testes_ARID4B: 4469, -571       | in gene, upstream        | 1 | 20.000 | 2 | 1_Testes_ARID4B: |
| 1_Testes_ARID4B: -4642, 398       | upstream, in gene        | 1 | 20.000 | 2 | 1_Testes_ARID4B: |
| 1_Testes_ARID4B:                  | 670 in gene              | 1 | 20.000 | 1 | 1_Testes_ARID4B: |
| 1_Testes_ARID4B:                  | -7301 upstream           | 1 | 20.000 | 1 | 1_Testes_ARID4B: |
| 1_Testes_ARID4B:                  | 52 in gene               | 1 | 23.000 | 1 | 1_Testes_ARID4B: |
| 1_Testes_ARID4B:                  | 17479 downstream         | 1 | 23.000 | 1 | 1_Testes_ARID4B: |
| 1_Testes_ARID4B: 538, -6710       | in gene, upstream        | 1 | 26.500 | 2 | 1_Testes_ARID4B: |
| 1_Testes_ARID4B: -7101, 147, 7939 | upstream, in gene, dow   | 1 | 32.000 | 3 | 1_Testes_ARID4B: |
| 1_Testes_ARID4B: -7723, 69        | upstream, in gene        | 1 | 33.500 | 2 | 1_Testes_ARID4B: |
| 1_Testes_ARID4B: 17236, 9444      | downstream, downstre     | 1 | 33.500 | 2 | 1_Testes_ARID4B: |
| 1_Testes_ARID4B:                  | -66 upstream             | 1 | 25.000 | 1 | 1_Testes_ARID4B: |
| 1_Testes_ARID4B:                  | 9696 downstream          | 1 | 22.000 | 1 | 1_Testes_ARID4B: |
| 1_Testes_ARID4B:                  | -324 upstream            | 1 | 22.000 | 1 | 1_Testes_ARID4B: |
| 1_Testes_ARID4B:                  | 158 in gene              | 1 | 22.000 | 1 | 1_Testes_ARID4B: |
| 1_Testes_ARID4B:                  | 10135 downstream         | 1 | 22.000 | 1 | 1_Testes_ARID4B: |
| 1_Testes_ARID4B: 1295, 463, -3473 | in gene, in gene, upstre | 1 | 29.667 | 3 | 1_Testes_ARID4B: |
| 1_Testes_ARID4B:                  | -348 upstream            | 1 | 38.000 | 1 | 1_Testes_ARID4B: |
| 1_Testes_ARID4B:                  | 1118 in gene             | 1 | 28.000 | 1 | 1_Testes_ARID4B: |
| 1_Testes_ARID4B: 33728, 288       | downstream, in gene      | 1 | 32.500 | 2 | 1_Testes_ARID4B: |
| 1_Testes_ARID4B: -5489, 26351     | upstream, downstream     | 1 | 28.500 | 2 | 1_Testes_ARID4B: |
| 1_Testes_ARID4B:                  | -144 upstream            | 1 | 20.000 | 1 | 1_Testes_ARID4B: |
| 1_Testes_ARID4B:                  | 3591 downstream          | 1 | 20.000 | 1 | 1_Testes_ARID4B: |
| 1_Testes_ARID4B: 81914, -518      | downstream, upstream     | 1 | 21.500 | 2 | 1_Testes_ARID4B: |
| 1_Testes_ARID4B:                  | 864 in gene              | 1 | 17.000 | 1 | 1_Testes_ARID4B: |
| 1_Testes_ARID4B:                  | 75 in gene               | 1 | 17.000 | 1 | 1_Testes_ARID4B: |
| 1_Testes_ARID4B:                  | 221 in gene              | 1 | 29.000 | 1 | 1_Testes_ARID4B: |
| 1_Testes_ARID4B:                  | 87 in gene               | 1 | 29.000 | 1 | 1_Testes_ARID4B: |
| 1_Testes_ARID4B:                  | 337 in gene              | 1 | 38.000 | 1 | 1_Testes_ARID4B: |
| 1_Testes_ARID4B: 29959, 135       | downstream, in gene      | 1 | 40.000 | 2 | 1_Testes_ARID4B: |
| 1_Testes_ARID4B: -212, 332        | upstream, in gene        | 1 | 31.000 | 2 | 1_Testes_ARID4B: |
| 1_Testes_ARID4B:                  | 4640 downstream          | 1 | 31.000 | 1 | 1_Testes_ARID4B: |
| 1_Testes_ARID4B:                  | 184 in gene              | 1 | 31.000 | 1 | 1_Testes_ARID4B: |
| 1_Testes_ARID4B:                  | -9764 upstream           | 1 | 31.000 | 1 | 1_Testes_ARID4B: |
| 1_Testes_ARID4B:                  | 1248 in gene             | 1 | 17.000 | 1 | 1_Testes_ARID4B: |
| 1_Testes_ARID4B:                  | 151 in gene              | 1 | 27.000 | 1 | 1_Testes_ARID4B: |
| 1_Testes_ARID4B:                  | 209 in gene              | 1 | 25.000 | 1 | 1_Testes_ARID4B: |
| 1_Testes_ARID4B:                  | 701 in gene              | 1 | 25.000 | 1 | 1_Testes_ARID4B: |
| 1_Testes_ARID4B:                  | 65 in gene               | 1 | 34.000 | 1 | 1_Testes_ARID4B: |
| 1_Testes_ARID4B:                  | 26562 downstream         | 1 | 34.000 | 1 | 1_Testes_ARID4B: |
| 1_Testes_ARID4B:                  | 184 in gene              | 1 | 37.000 | 1 | 1_Testes_ARID4B: |
| 1_Testes_ARID4B:                  | -41 upstream             | 1 | 37.000 | 1 | 1_Testes_ARID4B: |
| 1_Testes_ARID4B:                  | 404 in gene              | 1 | 26.000 | 1 | 1_Testes_ARID4B: |

|                                   |                         |   |        |   |                  |
|-----------------------------------|-------------------------|---|--------|---|------------------|
| 1_Testes_ARID4B:                  | 68608 downstream        | 1 | 26.000 | 1 | 1_Testes_ARID4B: |
| 1_Testes_ARID4B:                  | -7320 upstream          | 1 | 21.000 | 1 | 1_Testes_ARID4B: |
| 1_Testes_ARID4B:                  | 7234 downstream         | 1 | 21.000 | 1 | 1_Testes_ARID4B: |
| 1_Testes_ARID4B:                  | 247 in gene             | 1 | 21.000 | 1 | 1_Testes_ARID4B: |
| 1_Testes_ARID4B:                  | 201 in gene             | 1 | 30.000 | 1 | 1_Testes_ARID4B: |
| 1_Testes_ARID4B:                  | 241 in gene             | 1 | 35.000 | 1 | 1_Testes_ARID4B: |
| 1_Testes_ARID4B:                  | -534 upstream           | 1 | 19.000 | 1 | 1_Testes_ARID4B: |
| 1_Testes_ARID4B:                  | -248 upstream           | 1 | 30.000 | 1 | 1_Testes_ARID4B: |
| 1_Testes_ARID4B:                  | 301 in gene             | 1 | 23.000 | 1 | 1_Testes_ARID4B: |
| 1_Testes_ARID4B:                  | 1234 in gene            | 1 | 26.000 | 1 | 1_Testes_ARID4B: |
| 1_Testes_ARID4B:                  | 31 in gene              | 1 | 26.000 | 1 | 1_Testes_ARID4B: |
| 1_Testes_ARID4B:                  | 82682 downstream        | 1 | 33.000 | 1 | 1_Testes_ARID4B: |
| 1_Testes_ARID4B:                  | 329 in gene             | 1 | 33.000 | 1 | 1_Testes_ARID4B: |
| 1_Testes_ARID4B:                  | -161 upstream           | 1 | 17.000 | 1 | 1_Testes_ARID4B: |
| 1_Testes_ARID4B:                  | -215 upstream           | 1 | 17.000 | 1 | 1_Testes_ARID4B: |
| 1_Testes_ARID4B:                  | 110 in gene             | 1 | 28.000 | 1 | 1_Testes_ARID4B: |
| 1_Testes_ARID4B: 57267, 179       | downstream, in gene     | 1 | 36.000 | 2 | 1_Testes_ARID4B: |
| 1_Testes_ARID4B:                  | 283 in gene             | 1 | 18.000 | 1 | 1_Testes_ARID4B: |
| 1_Testes_ARID4B:                  | 154 in gene             | 1 | 21.000 | 1 | 1_Testes_ARID4B: |
| 1_Testes_ARID4B:                  | -391 upstream           | 1 | 23.000 | 1 | 1_Testes_ARID4B: |
| 1_Testes_ARID4B:                  | 149 in gene             | 1 | 25.000 | 1 | 1_Testes_ARID4B: |
| 1_Testes_ARID4B:                  | 33750 downstream        | 1 | 19.000 | 1 | 1_Testes_ARID4B: |
| 1_Testes_ARID4B:                  | -86 upstream            | 1 | 19.000 | 1 | 1_Testes_ARID4B: |
| 1_Testes_ARID4B:                  | 181 in gene             | 1 | 19.000 | 1 | 1_Testes_ARID4B: |
| 1_Testes_ARID4B:                  | 63 in gene              | 1 | 23.000 | 1 | 1_Testes_ARID4B: |
| 1_Testes_ARID4B:                  | 22048 downstream        | 1 | 23.000 | 1 | 1_Testes_ARID4B: |
| 1_Testes_ARID4B:                  | 59655 downstream        | 1 | 34.000 | 1 | 1_Testes_ARID4B: |
| 1_Testes_ARID4B:                  | 89 in gene              | 1 | 34.000 | 1 | 1_Testes_ARID4B: |
| 1_Testes_ARID4B:                  | 355 in gene             | 1 | 23.000 | 1 | 1_Testes_ARID4B: |
| 1_Testes_ARID4B:                  | 1219 in gene            | 1 | 21.000 | 1 | 1_Testes_ARID4B: |
| 1_Testes_ARID4B: 395747, 163      | downstream, in gene     | 1 | 19.500 | 2 | 1_Testes_ARID4B: |
| 1_Testes_ARID4B:                  | 171 in gene             | 1 | 20.000 | 1 | 1_Testes_ARID4B: |
| 1_Testes_ARID4B:                  | 78 in gene              | 1 | 26.000 | 1 | 1_Testes_ARID4B: |
| 1_Testes_ARID4B: 50149, 49253     | in gene, in gene        | 1 | 20.000 | 2 | 1_Testes_ARID4B: |
| 1_Testes_ARID4B:                  | 33040 in gene           | 1 | 21.000 | 1 | 1_Testes_ARID4B: |
| 1_Testes_ARID4B: 2611, -9357      | in gene, upstream       | 1 | 29.000 | 2 | 1_Testes_ARID4B: |
| 1_Testes_ARID4B:                  | 228 in gene             | 1 | 36.000 | 1 | 1_Testes_ARID4B: |
| 1_Testes_ARID4B: 200, 77608       | in gene, downstream     | 1 | 29.000 | 2 | 1_Testes_ARID4B: |
| 1_Testes_ARID4B: -610, -4898      | upstream, upstream      | 1 | 28.500 | 2 | 1_Testes_ARID4B: |
| 1_Testes_ARID4B: 536, 4824, 58920 | in gene, in gene, downs | 1 | 30.667 | 3 | 1_Testes_ARID4B: |
| 1_Testes_ARID4B: 4731, 443        | downstream, in gene     | 1 | 28.500 | 2 | 1_Testes_ARID4B: |
| 1_Testes_ARID4B:                  | 330 in gene             | 1 | 35.000 | 1 | 1_Testes_ARID4B: |
| 1_Testes_ARID4B:                  | 183 in gene             | 1 | 35.000 | 1 | 1_Testes_ARID4B: |
| 1_Testes_ARID4B:                  | 21535 downstream        | 1 | 22.000 | 1 | 1_Testes_ARID4B: |
| 1_Testes_ARID4B: 4508, 167        | in gene, in gene        | 1 | 29.000 | 2 | 1_Testes_ARID4B: |
| 1_Testes_ARID4B:                  | 314 in gene             | 1 | 28.000 | 1 | 1_Testes_ARID4B: |
| 1_Testes_ARID4B: 48, 16464        | in gene, downstream     | 1 | 33.500 | 2 | 1_Testes_ARID4B: |

|                                   |                         |   |        |   |                  |
|-----------------------------------|-------------------------|---|--------|---|------------------|
| 1_Testes_ARID4B:                  | 168 in gene             | 1 | 30.000 | 1 | 1_Testes_ARID4B: |
| 1_Testes_ARID4B:                  | 15056 downstream        | 1 | 30.000 | 1 | 1_Testes_ARID4B: |
| 1_Testes_ARID4B:                  | 28848 downstream        | 1 | 33.000 | 1 | 1_Testes_ARID4B: |
| 1_Testes_ARID4B:                  | 340 in gene             | 1 | 33.000 | 1 | 1_Testes_ARID4B: |
| 1_Testes_ARID4B:                  | 16489 downstream        | 1 | 33.000 | 1 | 1_Testes_ARID4B: |
| 1_Testes_ARID4B:                  | -452 upstream           | 1 | 27.000 | 1 | 1_Testes_ARID4B: |
| 1_Testes_ARID4B:                  | 820 in gene             | 1 | 34.000 | 1 | 1_Testes_ARID4B: |
| 1_Testes_ARID4B:                  | 29409 downstream        | 1 | 40.000 | 1 | 1_Testes_ARID4B: |
| 1_Testes_ARID4B:                  | 260 in gene             | 1 | 40.000 | 1 | 1_Testes_ARID4B: |
| 1_Testes_ARID4B:                  | 28624 downstream        | 1 | 26.000 | 1 | 1_Testes_ARID4B: |
| 1_Testes_ARID4B:                  | 1509 in gene            | 1 | 26.000 | 1 | 1_Testes_ARID4B: |
| 1_Testes_ARID4B:                  | 5071 in gene            | 1 | 26.000 | 1 | 1_Testes_ARID4B: |
| 1_Testes_ARID4B:                  | 252 in gene             | 1 | 30.000 | 1 | 1_Testes_ARID4B: |
| 1_Testes_ARID4B:                  | 197 in gene             | 1 | 22.000 | 1 | 1_Testes_ARID4B: |
| 1_Testes_ARID4B:                  | 302 in gene             | 1 | 15.000 | 1 | 1_Testes_ARID4B: |
| 1_Testes_ARID4B:                  | -88 upstream            | 1 | 18.000 | 1 | 1_Testes_ARID4B: |
| 1_Testes_ARID4B: 441, -407        | in gene, upstream       | 1 | 21.500 | 2 | 1_Testes_ARID4B: |
| 1_Testes_ARID4B:                  | 454 in gene             | 1 | 41.000 | 1 | 1_Testes_ARID4B: |
| 1_Testes_ARID4B:                  | -4179 upstream          | 1 | 41.000 | 1 | 1_Testes_ARID4B: |
| 1_Testes_ARID4B:                  | 61 in gene              | 1 | 34.000 | 1 | 1_Testes_ARID4B: |
| 1_Testes_ARID4B:                  | 39404 downstream        | 1 | 31.000 | 1 | 1_Testes_ARID4B: |
| 1_Testes_ARID4B:                  | 320 in gene             | 1 | 31.000 | 1 | 1_Testes_ARID4B: |
| 1_Testes_ARID4B: 673, -543, -2015 | in gene, upstream, upst | 1 | 24.000 | 3 | 1_Testes_ARID4B: |
| 1_Testes_ARID4B: -846, 370, 1842  | upstream, in gene, in g | 1 | 24.000 | 3 | 1_Testes_ARID4B: |
| 1_Testes_ARID4B:                  | 302 in gene             | 1 | 45.000 | 1 | 1_Testes_ARID4B: |
| 1_Testes_ARID4B: 32591, 359       | downstream, in gene     | 1 | 37.500 | 2 | 1_Testes_ARID4B: |
| 1_Testes_ARID4B:                  | 80350 downstream        | 1 | 30.000 | 1 | 1_Testes_ARID4B: |
| 1_Testes_ARID4B:                  | 66 in gene              | 1 | 25.000 | 1 | 1_Testes_ARID4B: |
| 1_Testes_ARID4B: -431, 1441       | upstream, in gene       | 1 | 22.500 | 2 | 1_Testes_ARID4B: |
| 1_Testes_ARID4B:                  | 64 in gene              | 1 | 32.000 | 1 | 1_Testes_ARID4B: |
| 1_Testes_ARID4B:                  | 111 in gene             | 1 | 24.000 | 1 | 1_Testes_ARID4B: |
| 1_Testes_ARID4B:                  | 4409 in gene            | 1 | 17.000 | 1 | 1_Testes_ARID4B: |
| 1_Testes_ARID4B:                  | -240 upstream           | 1 | 26.000 | 1 | 1_Testes_ARID4B: |
| 1_Testes_ARID4B:                  | 33 in gene              | 1 | 26.000 | 1 | 1_Testes_ARID4B: |
| 1_Testes_ARID4B:                  | -150 upstream           | 1 | 27.000 | 1 | 1_Testes_ARID4B: |
| 1_Testes_ARID4B: 68187, 1611      | in gene, in gene        | 1 | 30.000 | 2 | 1_Testes_ARID4B: |
| 1_Testes_ARID4B:                  | 195 in gene             | 1 | 25.000 | 1 | 1_Testes_ARID4B: |
| 1_Testes_ARID4B:                  | -651 upstream           | 1 | 25.000 | 1 | 1_Testes_ARID4B: |
| 1_Testes_ARID4B:                  | -2696 upstream          | 1 | 25.000 | 1 | 1_Testes_ARID4B: |
| 1_Testes_ARID4B:                  | -6561 upstream          | 1 | 25.000 | 1 | 1_Testes_ARID4B: |
| 1_Testes_ARID4B:                  | 245 in gene             | 1 | 30.000 | 1 | 1_Testes_ARID4B: |
| 1_Testes_ARID4B:                  | 185 in gene             | 1 | 27.000 | 1 | 1_Testes_ARID4B: |
| 1_Testes_ARID4B:                  | 521 in gene             | 1 | 30.000 | 1 | 1_Testes_ARID4B: |
| 1_Testes_ARID4B:                  | 156 in gene             | 1 | 33.000 | 1 | 1_Testes_ARID4B: |
| 1_Testes_ARID4B:                  | 621 in gene             | 1 | 25.000 | 1 | 1_Testes_ARID4B: |
| 1_Testes_ARID4B:                  | 245 in gene             | 1 | 39.000 | 1 | 1_Testes_ARID4B: |
| 1_Testes_ARID4B: 393, 40169       | in gene, downstream     | 1 | 27.000 | 2 | 1_Testes_ARID4B: |



|                                    |                          |   |        |   |                  |
|------------------------------------|--------------------------|---|--------|---|------------------|
| 1_Testes_ARID4B:                   | 475 in gene              | 1 | 29.000 | 1 | 1_Testes_ARID4B: |
| 1_Testes_ARID4B:                   | 830 in gene              | 1 | 26.000 | 1 | 1_Testes_ARID4B: |
| 1_Testes_ARID4B:                   | 201 in gene              | 1 | 27.000 | 1 | 1_Testes_ARID4B: |
| 1_Testes_ARID4B:                   | 844 in gene              | 1 | 25.000 | 1 | 1_Testes_ARID4B: |
| 1_Testes_ARID4B:                   | -6972 upstream           | 1 | 29.000 | 1 | 1_Testes_ARID4B: |
| 1_Testes_ARID4B:                   | 136 in gene              | 1 | 29.000 | 1 | 1_Testes_ARID4B: |
| 1_Testes_ARID4B:                   | 186 in gene              | 1 | 28.000 | 1 | 1_Testes_ARID4B: |
| 1_Testes_ARID4B: -1070, -7950      | upstream, upstream       | 1 | 24.500 | 2 | 1_Testes_ARID4B: |
| 1_Testes_ARID4B: -6101, 779        | upstream, in gene        | 1 | 24.500 | 2 | 1_Testes_ARID4B: |
| 1_Testes_ARID4B: -550, 538         | upstream, in gene        | 1 | 23.500 | 2 | 1_Testes_ARID4B: |
| 1_Testes_ARID4B:                   | -758 upstream            | 1 | 20.000 | 1 | 1_Testes_ARID4B: |
| 1_Testes_ARID4B:                   | 19229 downstream         | 1 | 20.000 | 1 | 1_Testes_ARID4B: |
| 1_Testes_ARID4B:                   | 542 in gene              | 1 | 20.000 | 1 | 1_Testes_ARID4B: |
| 1_Testes_ARID4B:                   | 55 in gene               | 1 | 31.000 | 1 | 1_Testes_ARID4B: |
| 1_Testes_ARID4B:                   | 9507 downstream          | 1 | 31.000 | 1 | 1_Testes_ARID4B: |
| 1_Testes_ARID4B:                   | 142 in gene              | 1 | 26.000 | 1 | 1_Testes_ARID4B: |
| 1_Testes_ARID4B: 660, 84           | in gene, in gene         | 1 | 29.000 | 2 | 1_Testes_ARID4B: |
| 1_Testes_ARID4B:                   | 143 in gene              | 1 | 32.000 | 1 | 1_Testes_ARID4B: |
| 1_Testes_ARID4B: 29223, 412        | downstream, in gene      | 1 | 32.000 | 2 | 1_Testes_ARID4B: |
| 1_Testes_ARID4B: 19421, 5501, 1053 | in gene, in gene, in gen | 1 | 24.333 | 3 | 1_Testes_ARID4B: |
| 1_Testes_ARID4B:                   | 810 in gene              | 1 | 21.000 | 1 | 1_Testes_ARID4B: |
| 1_Testes_ARID4B:                   | -8876 upstream           | 1 | 21.000 | 1 | 1_Testes_ARID4B: |
| 1_Testes_ARID4B: 118, 636886       | in gene, in gene         | 1 | 24.500 | 2 | 1_Testes_ARID4B: |
| 1_Testes_ARID4B:                   | -1383 upstream           | 1 | 21.000 | 1 | 1_Testes_ARID4B: |
| 1_Testes_ARID4B:                   | -3090 upstream           | 1 | 20.000 | 1 | 1_Testes_ARID4B: |
| 1_Testes_ARID4B:                   | 461 in gene              | 1 | 20.000 | 1 | 1_Testes_ARID4B: |
| 1_Testes_ARID4B:                   | -2800 upstream           | 1 | 20.000 | 1 | 1_Testes_ARID4B: |
| 1_Testes_ARID4B:                   | 1132 in gene             | 1 | 21.000 | 1 | 1_Testes_ARID4B: |
| 1_Testes_ARID4B:                   | -1338 upstream           | 1 | 21.000 | 1 | 1_Testes_ARID4B: |
| 1_Testes_ARID4B: 227, 23155        | in gene, downstream      | 1 | 23.000 | 2 | 1_Testes_ARID4B: |
| 1_Testes_ARID4B:                   | 106 in gene              | 1 | 22.000 | 1 | 1_Testes_ARID4B: |
| 1_Testes_ARID4B:                   | 50 in gene               | 1 | 44.000 | 1 | 1_Testes_ARID4B: |
| 1_Testes_ARID4B:                   | 82221 downstream         | 1 | 44.000 | 1 | 1_Testes_ARID4B: |
| 1_Testes_ARID4B:                   | 198 in gene              | 1 | 28.000 | 1 | 1_Testes_ARID4B: |
| 1_Testes_ARID4B:                   | 502 in gene              | 1 | 32.000 | 1 | 1_Testes_ARID4B: |
| 1_Testes_ARID4B:                   | 119 in gene              | 1 | 24.000 | 1 | 1_Testes_ARID4B: |
| 1_Testes_ARID4B:                   | 787 in gene              | 1 | 21.000 | 1 | 1_Testes_ARID4B: |
| 1_Testes_ARID4B:                   | 367 in gene              | 1 | 31.000 | 1 | 1_Testes_ARID4B: |
| 1_Testes_ARID4B:                   | 258 in gene              | 1 | 23.000 | 1 | 1_Testes_ARID4B: |
| 1_Testes_ARID4B:                   | 635 in gene              | 1 | 32.000 | 1 | 1_Testes_ARID4B: |
| 1_Testes_ARID4B:                   | -670 upstream            | 1 | 28.000 | 1 | 1_Testes_ARID4B: |
| 1_Testes_ARID4B:                   | 288 in gene              | 1 | 28.000 | 1 | 1_Testes_ARID4B: |
| 1_Testes_ARID4B:                   | 117 in gene              | 1 | 25.000 | 1 | 1_Testes_ARID4B: |
| 1_Testes_ARID4B: -106, 118022      | upstream, downstream     | 1 | 24.500 | 2 | 1_Testes_ARID4B: |
| 1_Testes_ARID4B:                   | -354 upstream            | 1 | 25.000 | 1 | 1_Testes_ARID4B: |
| 1_Testes_ARID4B:                   | 11266 downstream         | 1 | 28.000 | 1 | 1_Testes_ARID4B: |
| 1_Testes_ARID4B:                   | 195 in gene              | 1 | 28.000 | 1 | 1_Testes_ARID4B: |

|                              |       |                     |   |        |   |                  |
|------------------------------|-------|---------------------|---|--------|---|------------------|
| 1_Testes_ARID4B:             | 13899 | downstream          | 1 | 23.000 | 1 | 1_Testes_ARID4B: |
| 1_Testes_ARID4B:             | 415   | in gene             | 1 | 23.000 | 1 | 1_Testes_ARID4B: |
| 1_Testes_ARID4B:             | -8943 | upstream            | 1 | 26.000 | 1 | 1_Testes_ARID4B: |
| 1_Testes_ARID4B:             | -214  | upstream            | 1 | 26.000 | 1 | 1_Testes_ARID4B: |
| 1_Testes_ARID4B:             | 82354 | downstream          | 1 | 30.000 | 1 | 1_Testes_ARID4B: |
| 1_Testes_ARID4B:             | 2973  | in gene             | 1 | 30.000 | 1 | 1_Testes_ARID4B: |
| 1_Testes_ARID4B: 654, 126    |       | in gene, in gene    | 1 | 21.500 | 2 | 1_Testes_ARID4B: |
| 1_Testes_ARID4B: -824, -296  |       | upstream, upstream  | 1 | 21.500 | 2 | 1_Testes_ARID4B: |
| 1_Testes_ARID4B:             | 265   | in gene             | 1 | 36.000 | 1 | 1_Testes_ARID4B: |
| 1_Testes_ARID4B: 51933, 381  |       | downstream, in gene | 1 | 31.500 | 2 | 1_Testes_ARID4B: |
| 1_Testes_ARID4B:             | 273   | in gene             | 1 | 23.000 | 1 | 1_Testes_ARID4B: |
| 1_Testes_ARID4B:             | 340   | in gene             | 1 | 21.000 | 1 | 1_Testes_ARID4B: |
| 1_Testes_ARID4B:             | -712  | upstream            | 1 | 21.000 | 1 | 1_Testes_ARID4B: |
| 1_Testes_ARID4B:             | 313   | in gene             | 1 | 21.000 | 1 | 1_Testes_ARID4B: |
| 1_Testes_ARID4B:             | 152   | in gene             | 1 | 27.000 | 1 | 1_Testes_ARID4B: |
| 1_Testes_ARID4B: 509, -4259  |       | in gene, upstream   | 1 | 29.000 | 2 | 1_Testes_ARID4B: |
| 1_Testes_ARID4B: -648, 4120  |       | upstream, in gene   | 1 | 29.000 | 2 | 1_Testes_ARID4B: |
| 1_Testes_ARID4B:             | -5189 | upstream            | 1 | 26.000 | 1 | 1_Testes_ARID4B: |
| 1_Testes_ARID4B: 126, 32878  |       | in gene, downstream | 1 | 38.000 | 2 | 1_Testes_ARID4B: |
| 1_Testes_ARID4B:             | 636   | in gene             | 1 | 50.000 | 1 | 1_Testes_ARID4B: |
| 1_Testes_ARID4B:             | 219   | in gene             | 1 | 19.000 | 1 | 1_Testes_ARID4B: |
| 1_Testes_ARID4B:             | 425   | in gene             | 1 | 28.000 | 1 | 1_Testes_ARID4B: |
| 1_Testes_ARID4B:             | -760  | upstream            | 1 | 18.000 | 1 | 1_Testes_ARID4B: |
| 1_Testes_ARID4B:             | 1382  | in gene             | 1 | 18.000 | 1 | 1_Testes_ARID4B: |
| 1_Testes_ARID4B:             | 210   | in gene             | 1 | 26.000 | 1 | 1_Testes_ARID4B: |
| 1_Testes_ARID4B:             | 81    | in gene             | 1 | 35.000 | 1 | 1_Testes_ARID4B: |
| 1_Testes_ARID4B:             | 431   | in gene             | 1 | 18.000 | 1 | 1_Testes_ARID4B: |
| 1_Testes_ARID4B:             | 174   | in gene             | 1 | 28.000 | 1 | 1_Testes_ARID4B: |
| 1_Testes_ARID4B:             | 193   | in gene             | 1 | 22.000 | 1 | 1_Testes_ARID4B: |
| 1_Testes_ARID4B:             | 127   | in gene             | 1 | 35.000 | 1 | 1_Testes_ARID4B: |
| 1_Testes_ARID4B:             | 54    | in gene             | 1 | 27.000 | 1 | 1_Testes_ARID4B: |
| 1_Testes_ARID4B:             | -421  | upstream            | 1 | 22.000 | 1 | 1_Testes_ARID4B: |
| 1_Testes_ARID4B:             | 1700  | in gene             | 1 | 22.000 | 1 | 1_Testes_ARID4B: |
| 1_Testes_ARID4B: 52, -2380   |       | in gene, upstream   | 1 | 30.500 | 2 | 1_Testes_ARID4B: |
| 1_Testes_ARID4B: -2290, 142  |       | upstream, in gene   | 1 | 30.500 | 2 | 1_Testes_ARID4B: |
| 1_Testes_ARID4B:             | 194   | in gene             | 1 | 20.000 | 1 | 1_Testes_ARID4B: |
| 1_Testes_ARID4B:             | -340  | upstream            | 1 | 20.000 | 1 | 1_Testes_ARID4B: |
| 1_Testes_ARID4B: 124266, 442 |       | downstream, in gene | 1 | 25.500 | 2 | 1_Testes_ARID4B: |
| 1_Testes_ARID4B:             | 30    | in gene             | 1 | 31.000 | 1 | 1_Testes_ARID4B: |
| 1_Testes_ARID4B:             | 676   | in gene             | 1 | 19.000 | 1 | 1_Testes_ARID4B: |
| 1_Testes_ARID4B:             | 140   | in gene             | 1 | 25.000 | 1 | 1_Testes_ARID4B: |
| 1_Testes_ARID4B:             | 23    | in gene             | 1 | 16.000 | 1 | 1_Testes_ARID4B: |
| 1_Testes_ARID4B:             | 247   | in gene             | 1 | 29.000 | 1 | 1_Testes_ARID4B: |
| 1_Testes_ARID4B:             | 957   | in gene             | 1 | 44.000 | 1 | 1_Testes_ARID4B: |
| 1_Testes_ARID4B:             | 318   | in gene             | 1 | 21.000 | 1 | 1_Testes_ARID4B: |
| 1_Testes_ARID4B:             | 462   | in gene             | 1 | 18.000 | 1 | 1_Testes_ARID4B: |
| 1_Testes_ARID4B:             | 373   | in gene             | 1 | 25.000 | 1 | 1_Testes_ARID4B: |

|                              |                     |   |        |   |                  |
|------------------------------|---------------------|---|--------|---|------------------|
| 1_Testes_ARID4B:             | 273 in gene         | 1 | 25.000 | 1 | 1_Testes_ARID4B: |
| 1_Testes_ARID4B: 353, -735   | in gene, upstream   | 1 | 28.000 | 2 | 1_Testes_ARID4B: |
| 1_Testes_ARID4B: 1374, 518   | in gene, in gene    | 1 | 19.500 | 2 | 1_Testes_ARID4B: |
| 1_Testes_ARID4B:             | 412 in gene         | 1 | 28.000 | 1 | 1_Testes_ARID4B: |
| 1_Testes_ARID4B:             | 528 in gene         | 1 | 31.000 | 1 | 1_Testes_ARID4B: |
| 1_Testes_ARID4B:             | 195 in gene         | 1 | 31.000 | 1 | 1_Testes_ARID4B: |
| 1_Testes_ARID4B:             | 3 in gene           | 1 | 27.000 | 1 | 1_Testes_ARID4B: |
| 1_Testes_ARID4B:             | -17 upstream        | 1 | 27.000 | 1 | 1_Testes_ARID4B: |
| 1_Testes_ARID4B:             | -402 upstream       | 1 | 22.000 | 1 | 1_Testes_ARID4B: |
| 1_Testes_ARID4B:             | -365 upstream       | 1 | 18.000 | 1 | 1_Testes_ARID4B: |
| 1_Testes_ARID4B:             | 2754 in gene        | 1 | 18.000 | 1 | 1_Testes_ARID4B: |
| 1_Testes_ARID4B:             | 257 in gene         | 1 | 36.000 | 1 | 1_Testes_ARID4B: |
| 1_Testes_ARID4B:             | 169 in gene         | 1 | 26.000 | 1 | 1_Testes_ARID4B: |
| 1_Testes_ARID4B:             | 159 in gene         | 1 | 24.000 | 1 | 1_Testes_ARID4B: |
| 1_Testes_ARID4B:             | -1522 upstream      | 1 | 28.000 | 1 | 1_Testes_ARID4B: |
| 1_Testes_ARID4B:             | 1225 in gene        | 1 | 28.000 | 1 | 1_Testes_ARID4B: |
| 1_Testes_ARID4B:             | -6409 upstream      | 1 | 27.000 | 1 | 1_Testes_ARID4B: |
| 1_Testes_ARID4B:             | 180 in gene         | 1 | 27.000 | 1 | 1_Testes_ARID4B: |
| 1_Testes_ARID4B:             | 258 in gene         | 1 | 17.000 | 1 | 1_Testes_ARID4B: |
| 1_Testes_ARID4B:             | 328 in gene         | 1 | 20.000 | 1 | 1_Testes_ARID4B: |
| 1_Testes_ARID4B:             | -7069 upstream      | 1 | 42.000 | 1 | 1_Testes_ARID4B: |
| 1_Testes_ARID4B:             | 169 in gene         | 1 | 42.000 | 1 | 1_Testes_ARID4B: |
| 1_Testes_ARID4B:             | 17386 downstream    | 1 | 21.000 | 1 | 1_Testes_ARID4B: |
| 1_Testes_ARID4B:             | 293 in gene         | 1 | 21.000 | 1 | 1_Testes_ARID4B: |
| 1_Testes_ARID4B:             | 746 in gene         | 1 | 17.000 | 1 | 1_Testes_ARID4B: |
| 1_Testes_ARID4B:             | 157 in gene         | 1 | 17.000 | 1 | 1_Testes_ARID4B: |
| 1_Testes_ARID4B:             | 713 in gene         | 1 | 25.000 | 1 | 1_Testes_ARID4B: |
| 1_Testes_ARID4B:             | 187 in gene         | 1 | 28.000 | 1 | 1_Testes_ARID4B: |
| 1_Testes_ARID4B: -1255, 249  | upstream, in gene   | 1 | 34.000 | 2 | 1_Testes_ARID4B: |
| 1_Testes_ARID4B:             | 664 in gene         | 1 | 22.000 | 1 | 1_Testes_ARID4B: |
| 1_Testes_ARID4B: 84, 2740    | in gene, in gene    | 1 | 41.500 | 2 | 1_Testes_ARID4B: |
| 1_Testes_ARID4B:             | 568 in gene         | 1 | 30.000 | 1 | 1_Testes_ARID4B: |
| 1_Testes_ARID4B:             | 113 in gene         | 1 | 20.000 | 1 | 1_Testes_ARID4B: |
| 1_Testes_ARID4B:             | 1028 in gene        | 1 | 28.000 | 1 | 1_Testes_ARID4B: |
| 1_Testes_ARID4B:             | 177 in gene         | 1 | 33.000 | 1 | 1_Testes_ARID4B: |
| 1_Testes_ARID4B:             | -759 upstream       | 1 | 33.000 | 1 | 1_Testes_ARID4B: |
| 1_Testes_ARID4B:             | 146 in gene         | 1 | 23.000 | 1 | 1_Testes_ARID4B: |
| 1_Testes_ARID4B:             | 125 in gene         | 1 | 32.000 | 1 | 1_Testes_ARID4B: |
| 1_Testes_ARID4B:             | 25801 in gene       | 1 | 23.000 | 1 | 1_Testes_ARID4B: |
| 1_Testes_ARID4B:             | 175 in gene         | 1 | 31.000 | 1 | 1_Testes_ARID4B: |
| 1_Testes_ARID4B:             | -7736 upstream      | 1 | 31.000 | 1 | 1_Testes_ARID4B: |
| 1_Testes_ARID4B:             | 347 in gene         | 1 | 24.000 | 1 | 1_Testes_ARID4B: |
| 1_Testes_ARID4B:             | 456 in gene         | 1 | 42.000 | 1 | 1_Testes_ARID4B: |
| 1_Testes_ARID4B:             | 157 in gene         | 1 | 44.000 | 1 | 1_Testes_ARID4B: |
| 1_Testes_ARID4B:             | 8540 downstream     | 1 | 44.000 | 1 | 1_Testes_ARID4B: |
| 1_Testes_ARID4B:             | 17982 downstream    | 1 | 44.000 | 1 | 1_Testes_ARID4B: |
| 1_Testes_ARID4B: 9490, 11058 | in gene, downstream | 1 | 21.500 | 2 | 1_Testes_ARID4B: |

|                                      |                      |   |        |   |                  |
|--------------------------------------|----------------------|---|--------|---|------------------|
| 1_Testes_ARID4B: 2612, 1044          | downstream, in gene  | 1 | 21.500 | 2 | 1_Testes_ARID4B: |
| 1_Testes_ARID4B: 13323, 11755, -6309 | downstream, downstre | 1 | 21.000 | 3 | 1_Testes_ARID4B: |
| 1_Testes_ARID4B:                     | 5651 in gene         | 1 | 20.000 | 1 | 1_Testes_ARID4B: |
| 1_Testes_ARID4B:                     | 604 in gene          | 1 | 33.000 | 1 | 1_Testes_ARID4B: |
| 1_Testes_ARID4B: 103869, 205         | downstream, in gene  | 1 | 28.000 | 2 | 1_Testes_ARID4B: |
| 1_Testes_ARID4B:                     | 64040 downstream     | 1 | 30.000 | 1 | 1_Testes_ARID4B: |
| 1_Testes_ARID4B: 984, -4840          | in gene, upstream    | 1 | 33.000 | 2 | 1_Testes_ARID4B: |
| 1_Testes_ARID4B: 5922, 98            | downstream, in gene  | 1 | 33.000 | 2 | 1_Testes_ARID4B: |
| 1_Testes_ARID4B: 345893, 340069      | downstream, downstre | 1 | 33.000 | 2 | 1_Testes_ARID4B: |
| 1_Testes_ARID4B:                     | 134680 downstream    | 1 | 34.000 | 1 | 1_Testes_ARID4B: |
| 1_Testes_ARID4B:                     | 615 in gene          | 1 | 34.000 | 1 | 1_Testes_ARID4B: |
| 1_Testes_ARID4B: 7305, -9895         | downstream, upstream | 1 | 29.000 | 2 | 1_Testes_ARID4B: |
| 1_Testes_ARID4B: -7649, 9551         | upstream, downstream | 1 | 29.000 | 2 | 1_Testes_ARID4B: |
| 1_Testes_ARID4B:                     | 4450 downstream      | 1 | 24.000 | 1 | 1_Testes_ARID4B: |
| 1_Testes_ARID4B: 205, 17565          | in gene, downstream  | 1 | 24.000 | 2 | 1_Testes_ARID4B: |
| 1_Testes_ARID4B: 16655, -705         | downstream, upstream | 1 | 24.000 | 2 | 1_Testes_ARID4B: |
| 1_Testes_ARID4B:                     | 5865 downstream      | 1 | 24.000 | 1 | 1_Testes_ARID4B: |
| 1_Testes_ARID4B:                     | -43 upstream         | 1 | 24.000 | 1 | 1_Testes_ARID4B: |
| 1_Testes_ARID4B:                     | -7832 upstream       | 1 | 24.000 | 1 | 1_Testes_ARID4B: |
| 1_Testes_ARID4B: 1518, 206           | in gene, in gene     | 1 | 24.000 | 2 | 1_Testes_ARID4B: |
| 1_Testes_ARID4B: -1285, -2597        | upstream, upstream   | 1 | 24.000 | 2 | 1_Testes_ARID4B: |
| 1_Testes_ARID4B:                     | 635 in gene          | 1 | 21.000 | 1 | 1_Testes_ARID4B: |
| 1_Testes_ARID4B:                     | 314 in gene          | 1 | 25.000 | 1 | 1_Testes_ARID4B: |
| 1_Testes_ARID4B: 102131, 243         | downstream, in gene  | 1 | 26.000 | 2 | 1_Testes_ARID4B: |
| 1_Testes_ARID4B:                     | 18879 downstream     | 1 | 22.000 | 1 | 1_Testes_ARID4B: |
| 1_Testes_ARID4B:                     | 119 in gene          | 1 | 22.000 | 1 | 1_Testes_ARID4B: |
| 1_Testes_ARID4B:                     | 9425 downstream      | 1 | 33.000 | 1 | 1_Testes_ARID4B: |
| 1_Testes_ARID4B:                     | 924 in gene          | 1 | 33.000 | 1 | 1_Testes_ARID4B: |
| 1_Testes_ARID4B: -7511, 10345        | upstream, downstream | 1 | 31.000 | 2 | 1_Testes_ARID4B: |
| 1_Testes_ARID4B:                     | 200 in gene          | 1 | 29.000 | 1 | 1_Testes_ARID4B: |
| 1_Testes_ARID4B:                     | 143 in gene          | 1 | 32.000 | 1 | 1_Testes_ARID4B: |
| 1_Testes_ARID4B: -1204, 13932        | upstream, downstream | 1 | 29.000 | 2 | 1_Testes_ARID4B: |
| 1_Testes_ARID4B: 15248, 112          | downstream, in gene  | 1 | 29.000 | 2 | 1_Testes_ARID4B: |
| 1_Testes_ARID4B: 96015, 84751        | downstream, in gene  | 1 | 22.000 | 2 | 1_Testes_ARID4B: |
| 1_Testes_ARID4B:                     | 152 in gene          | 1 | 36.000 | 1 | 1_Testes_ARID4B: |
| 1_Testes_ARID4B: 33123, 41731        | downstream, downstre | 1 | 33.000 | 2 | 1_Testes_ARID4B: |
| 1_Testes_ARID4B: 248, 8856           | in gene, downstream  | 1 | 33.000 | 2 | 1_Testes_ARID4B: |
| 1_Testes_ARID4B: -8503, 105          | upstream, in gene    | 1 | 33.000 | 2 | 1_Testes_ARID4B: |
| 1_Testes_ARID4B:                     | 15870 downstream     | 1 | 16.000 | 1 | 1_Testes_ARID4B: |
| 1_Testes_ARID4B: 9229, 1005          | in gene, in gene     | 1 | 21.500 | 2 | 1_Testes_ARID4B: |
| 1_Testes_ARID4B: -8166, 58           | upstream, in gene    | 1 | 21.500 | 2 | 1_Testes_ARID4B: |
| 1_Testes_ARID4B: 426, 11306          | in gene, downstream  | 1 | 25.500 | 2 | 1_Testes_ARID4B: |
| 1_Testes_ARID4B: -10388, 492         | upstream, in gene    | 1 | 25.500 | 2 | 1_Testes_ARID4B: |
| 1_Testes_ARID4B:                     | 8795 downstream      | 1 | 24.000 | 1 | 1_Testes_ARID4B: |
| 1_Testes_ARID4B: -287, 49889, 53121  | upstream, downstream | 1 | 26.333 | 3 | 1_Testes_ARID4B: |
| 1_Testes_ARID4B: 6475, 9707          | downstream, downstre | 1 | 27.500 | 2 | 1_Testes_ARID4B: |
| 1_Testes_ARID4B: 366, -2866          | in gene, upstream    | 1 | 27.500 | 2 | 1_Testes_ARID4B: |

|                                     |                        |   |        |   |                  |
|-------------------------------------|------------------------|---|--------|---|------------------|
| 1_Testes_ARID4B: -1343, 1889, 10241 | upstream, downstream   | 1 | 25.000 | 3 | 1_Testes_ARID4B: |
| 1_Testes_ARID4B: -1801, 1431, 9783  | upstream, downstream   | 1 | 25.000 | 3 | 1_Testes_ARID4B: |
| 1_Testes_ARID4B: -2916, 316, 8668   | upstream, in gene, dow | 1 | 25.000 | 3 | 1_Testes_ARID4B: |
| 1_Testes_ARID4B: 11694, 8462, 110   | downstream, downstre   | 1 | 25.000 | 3 | 1_Testes_ARID4B: |
| 1_Testes_ARID4B: 27392, 19040, 192  | downstream, downstre   | 1 | 25.333 | 3 | 1_Testes_ARID4B: |
| 1_Testes_ARID4B: 51972, 100         | downstream, in gene    | 1 | 28.000 | 2 | 1_Testes_ARID4B: |
| 1_Testes_ARID4B: 30398              | downstream             | 1 | 28.000 | 1 | 1_Testes_ARID4B: |
| 1_Testes_ARID4B: 353                | in gene                | 1 | 28.000 | 1 | 1_Testes_ARID4B: |
| 1_Testes_ARID4B: 19332              | downstream             | 1 | 26.000 | 1 | 1_Testes_ARID4B: |
| 1_Testes_ARID4B: 1392, 28048        | in gene, downstream    | 1 | 23.000 | 2 | 1_Testes_ARID4B: |
| 1_Testes_ARID4B: 325                | in gene                | 1 | 20.000 | 1 | 1_Testes_ARID4B: |
| 1_Testes_ARID4B: 152                | in gene                | 1 | 26.000 | 1 | 1_Testes_ARID4B: |
| 1_Testes_ARID4B: 13216              | downstream             | 1 | 41.000 | 1 | 1_Testes_ARID4B: |
| 1_Testes_ARID4B: 2762               | in gene                | 1 | 41.000 | 1 | 1_Testes_ARID4B: |
| 1_Testes_ARID4B: 276                | in gene                | 1 | 41.000 | 1 | 1_Testes_ARID4B: |
| 1_Testes_ARID4B: 549                | in gene                | 1 | 27.000 | 1 | 1_Testes_ARID4B: |
| 1_Testes_ARID4B: 48                 | in gene                | 1 | 32.000 | 1 | 1_Testes_ARID4B: |
| 1_Testes_ARID4B: -135               | upstream               | 1 | 32.000 | 1 | 1_Testes_ARID4B: |
| 1_Testes_ARID4B: 168, 113688        | in gene, downstream    | 1 | 25.000 | 2 | 1_Testes_ARID4B: |
| 1_Testes_ARID4B: 1929               | in gene                | 1 | 24.000 | 1 | 1_Testes_ARID4B: |
| 1_Testes_ARID4B: 48003              | in gene                | 1 | 21.000 | 1 | 1_Testes_ARID4B: |
| 1_Testes_ARID4B: 26914, 130         | downstream, in gene    | 1 | 28.000 | 2 | 1_Testes_ARID4B: |
| 1_Testes_ARID4B: 55138, 55810       | downstream, downstre   | 1 | 25.500 | 2 | 1_Testes_ARID4B: |
| 1_Testes_ARID4B: -501, 171, 92699   | upstream, in gene, dow | 1 | 24.333 | 3 | 1_Testes_ARID4B: |
| 1_Testes_ARID4B: -903               | upstream               | 1 | 22.000 | 1 | 1_Testes_ARID4B: |
| 1_Testes_ARID4B: 28865              | in gene                | 1 | 22.000 | 1 | 1_Testes_ARID4B: |
| 1_Testes_ARID4B: 4233               | in gene                | 1 | 19.000 | 1 | 1_Testes_ARID4B: |
| 1_Testes_ARID4B: 13702              | downstream             | 1 | 19.000 | 1 | 1_Testes_ARID4B: |
| 1_Testes_ARID4B: 241, 15953         | in gene, downstream    | 1 | 20.500 | 2 | 1_Testes_ARID4B: |
| 1_Testes_ARID4B: 21875, 6163        | downstream, in gene    | 1 | 20.500 | 2 | 1_Testes_ARID4B: |
| 1_Testes_ARID4B: -6254              | upstream               | 1 | 22.000 | 1 | 1_Testes_ARID4B: |
| 1_Testes_ARID4B: 161                | in gene                | 1 | 24.000 | 1 | 1_Testes_ARID4B: |
| 1_Testes_ARID4B: -123               | upstream               | 1 | 28.000 | 1 | 1_Testes_ARID4B: |
| 1_Testes_ARID4B: 227                | in gene                | 1 | 44.000 | 1 | 1_Testes_ARID4B: |
| 1_Testes_ARID4B: 255                | in gene                | 1 | 35.000 | 1 | 1_Testes_ARID4B: |
| 1_Testes_ARID4B: 666                | in gene                | 1 | 21.000 | 1 | 1_Testes_ARID4B: |
| 1_Testes_ARID4B: 248                | in gene                | 1 | 33.000 | 1 | 1_Testes_ARID4B: |
| 1_Testes_ARID4B: 97                 | in gene                | 1 | 30.000 | 1 | 1_Testes_ARID4B: |
| 1_Testes_ARID4B: 308                | in gene                | 1 | 26.000 | 1 | 1_Testes_ARID4B: |
| 1_Testes_ARID4B: 62467              | downstream             | 1 | 26.000 | 1 | 1_Testes_ARID4B: |
| 1_Testes_ARID4B: 435                | in gene                | 1 | 21.000 | 1 | 1_Testes_ARID4B: |
| 1_Testes_ARID4B: 4307               | downstream             | 1 | 21.000 | 1 | 1_Testes_ARID4B: |
| 1_Testes_ARID4B: 469                | in gene                | 1 | 34.000 | 1 | 1_Testes_ARID4B: |
| 1_Testes_ARID4B: 451                | in gene                | 1 | 28.000 | 1 | 1_Testes_ARID4B: |
| 1_Testes_ARID4B: 461                | in gene                | 1 | 28.000 | 1 | 1_Testes_ARID4B: |
| 1_Testes_ARID4B: 395                | in gene                | 1 | 27.000 | 1 | 1_Testes_ARID4B: |
| 1_Testes_ARID4B: -344               | upstream               | 1 | 28.000 | 1 | 1_Testes_ARID4B: |

|                               |                      |   |        |   |                  |
|-------------------------------|----------------------|---|--------|---|------------------|
| 1_Testes_ARID4B:              | 411 in gene          | 1 | 29.000 | 1 | 1_Testes_ARID4B: |
| 1_Testes_ARID4B:              | -1528 upstream       | 1 | 18.000 | 1 | 1_Testes_ARID4B: |
| 1_Testes_ARID4B:              | 274 in gene          | 1 | 18.000 | 1 | 1_Testes_ARID4B: |
| 1_Testes_ARID4B:              | 45339 downstream     | 1 | 19.000 | 1 | 1_Testes_ARID4B: |
| 1_Testes_ARID4B:              | 219 in gene          | 1 | 19.000 | 1 | 1_Testes_ARID4B: |
| 1_Testes_ARID4B:              | 20741 downstream     | 1 | 19.000 | 1 | 1_Testes_ARID4B: |
| 1_Testes_ARID4B:              | 529 in gene          | 1 | 17.000 | 1 | 1_Testes_ARID4B: |
| 1_Testes_ARID4B:              | 1042 in gene         | 1 | 28.000 | 1 | 1_Testes_ARID4B: |
| 1_Testes_ARID4B: 193, 17521   | in gene, downstream  | 1 | 37.500 | 2 | 1_Testes_ARID4B: |
| 1_Testes_ARID4B:              | 154 in gene          | 1 | 38.000 | 1 | 1_Testes_ARID4B: |
| 1_Testes_ARID4B:              | -2514 upstream       | 1 | 38.000 | 1 | 1_Testes_ARID4B: |
| 1_Testes_ARID4B:              | 8409 downstream      | 1 | 38.000 | 1 | 1_Testes_ARID4B: |
| 1_Testes_ARID4B:              | 290 in gene          | 1 | 24.000 | 1 | 1_Testes_ARID4B: |
| 1_Testes_ARID4B: -2670, -3582 | upstream, upstream   | 1 | 21.500 | 2 | 1_Testes_ARID4B: |
| 1_Testes_ARID4B: 72, 984      | in gene, in gene     | 1 | 21.500 | 2 | 1_Testes_ARID4B: |
| 1_Testes_ARID4B: -155, -5499  | upstream, upstream   | 1 | 24.500 | 2 | 1_Testes_ARID4B: |
| 1_Testes_ARID4B: -5205, 139   | upstream, in gene    | 1 | 24.500 | 2 | 1_Testes_ARID4B: |
| 1_Testes_ARID4B: -8653, 40755 | upstream, downstream | 1 | 22.500 | 2 | 1_Testes_ARID4B: |
| 1_Testes_ARID4B:              | 7 in gene            | 1 | 22.000 | 1 | 1_Testes_ARID4B: |
| 1_Testes_ARID4B: -97, 18463   | upstream, downstream | 1 | 21.000 | 2 | 1_Testes_ARID4B: |
| 1_Testes_ARID4B:              | 889 in gene          | 1 | 20.000 | 1 | 1_Testes_ARID4B: |
| 1_Testes_ARID4B:              | 14011 downstream     | 1 | 20.000 | 1 | 1_Testes_ARID4B: |
| 1_Testes_ARID4B:              | 784 in gene          | 1 | 32.000 | 1 | 1_Testes_ARID4B: |
| 1_Testes_ARID4B:              | 512 in gene          | 1 | 25.000 | 1 | 1_Testes_ARID4B: |
| 1_Testes_ARID4B:              | 58 in gene           | 1 | 26.000 | 1 | 1_Testes_ARID4B: |
| 1_Testes_ARID4B:              | -104 upstream        | 1 | 39.000 | 1 | 1_Testes_ARID4B: |
| 1_Testes_ARID4B: 23, 70327    | in gene, downstream  | 1 | 33.000 | 2 | 1_Testes_ARID4B: |
| 1_Testes_ARID4B:              | 82 in gene           | 1 | 27.000 | 1 | 1_Testes_ARID4B: |
| 1_Testes_ARID4B:              | -75 upstream         | 1 | 32.000 | 1 | 1_Testes_ARID4B: |
| 1_Testes_ARID4B:              | 49 in gene           | 1 | 32.000 | 1 | 1_Testes_ARID4B: |
| 1_Testes_ARID4B:              | 133 in gene          | 1 | 25.000 | 1 | 1_Testes_ARID4B: |
| 1_Testes_ARID4B: 851, 51283   | in gene, downstream  | 1 | 24.500 | 2 | 1_Testes_ARID4B: |
| 1_Testes_ARID4B:              | 102 in gene          | 1 | 26.000 | 1 | 1_Testes_ARID4B: |
| 1_Testes_ARID4B:              | 181 in gene          | 1 | 28.000 | 1 | 1_Testes_ARID4B: |
| 1_Testes_ARID4B:              | 104 in gene          | 1 | 29.000 | 1 | 1_Testes_ARID4B: |
| 1_Testes_ARID4B:              | 17508 downstream     | 1 | 29.000 | 1 | 1_Testes_ARID4B: |
| 1_Testes_ARID4B:              | 190 in gene          | 1 | 20.000 | 1 | 1_Testes_ARID4B: |
| 1_Testes_ARID4B:              | 520 in gene          | 1 | 16.000 | 1 | 1_Testes_ARID4B: |
| 1_Testes_ARID4B:              | 0 in gene            | 1 | 16.000 | 1 | 1_Testes_ARID4B: |
| 1_Testes_ARID4B:              | -6076 upstream       | 1 | 16.000 | 1 | 1_Testes_ARID4B: |
| 1_Testes_ARID4B: 81715, 80035 | in gene, in gene     | 1 | 17.500 | 2 | 1_Testes_ARID4B: |
| 1_Testes_ARID4B:              | 566 in gene          | 1 | 20.000 | 1 | 1_Testes_ARID4B: |
| 1_Testes_ARID4B:              | 2 in gene            | 1 | 23.000 | 1 | 1_Testes_ARID4B: |
| 1_Testes_ARID4B:              | 604 in gene          | 1 | 25.000 | 1 | 1_Testes_ARID4B: |
| 1_Testes_ARID4B:              | -10330 upstream      | 1 | 20.000 | 1 | 1_Testes_ARID4B: |
| 1_Testes_ARID4B:              | 210 in gene          | 1 | 20.000 | 1 | 1_Testes_ARID4B: |
| 1_Testes_ARID4B:              | 466 in gene          | 1 | 17.000 | 1 | 1_Testes_ARID4B: |

|                  |                  |   |        |   |                  |
|------------------|------------------|---|--------|---|------------------|
| 1_Testes_ARID4B: | 745 in gene      | 1 | 21.000 | 1 | 1_Testes_ARID4B: |
| 1_Testes_ARID4B: | 71 in gene       | 1 | 19.000 | 1 | 1_Testes_ARID4B: |
| 1_Testes_ARID4B: | 14275 downstream | 1 | 18.000 | 1 | 1_Testes_ARID4B: |
| 1_Testes_ARID4B: | 334 in gene      | 1 | 18.000 | 1 | 1_Testes_ARID4B: |
| 1_Testes_ARID4B: | 14490 downstream | 1 | 18.000 | 1 | 1_Testes_ARID4B: |
| 1_Testes_ARID4B: | 100 in gene      | 1 | 18.000 | 1 | 1_Testes_ARID4B: |
| 1_Testes_ARID4B: | 484 in gene      | 1 | 16.000 | 1 | 1_Testes_ARID4B: |
| 1_Testes_ARID4B: | 15959 downstream | 1 | 20.000 | 1 | 1_Testes_ARID4B: |
| 1_Testes_ARID4B: | 8044 downstream  | 1 | 20.000 | 1 | 1_Testes_ARID4B: |
| 1_Testes_ARID4B: | 23 in gene       | 1 | 20.000 | 1 | 1_Testes_ARID4B: |
| 1_Testes_ARID4B: | 5 in gene        | 1 | 25.000 | 1 | 1_Testes_ARID4B: |
| 1_Testes_ARID4B: | 2586 in gene     | 1 | 20.000 | 1 | 1_Testes_ARID4B: |
| 1_Testes_ARID4B: | 379 in gene      | 1 | 21.000 | 1 | 1_Testes_ARID4B: |
| 1_Testes_ARID4B: | 670 in gene      | 1 | 21.000 | 1 | 1_Testes_ARID4B: |
| 1_Testes_ARID4B: | 151 in gene      | 1 | 18.000 | 1 | 1_Testes_ARID4B: |
| 1_Testes_ARID4B: | 74 in gene       | 1 | 15.000 | 1 | 1_Testes_ARID4B: |
| 1_Testes_ARID4B: | 461 in gene      | 1 | 17.000 | 1 | 1_Testes_ARID4B: |
| 1_Testes_ARID4B: | 6833 downstream  | 1 | 16.000 | 1 | 1_Testes_ARID4B: |
| 1_Testes_ARID4B: | 302 in gene      | 1 | 16.000 | 1 | 1_Testes_ARID4B: |
| 1_Testes_ARID4B: | 192 in gene      | 1 | 20.000 | 1 | 1_Testes_ARID4B: |
| 1_Testes_ARID4B: | 942 in gene      | 1 | 20.000 | 1 | 1_Testes_ARID4B: |
| 1_Testes_ARID4B: | 204 in gene      | 1 | 15.000 | 1 | 1_Testes_ARID4B: |
| 1_Testes_ARID4B: | 353 in gene      | 1 | 20.000 | 1 | 1_Testes_ARID4B: |
| 1_Testes_ARID4B: | 270 in gene      | 1 | 29.000 | 1 | 1_Testes_ARID4B: |

| Peak Va | UCSC Link    | Altsymbols      | Full Description                                      | RNA              |
|---------|--------------|-----------------|-------------------------------------------------------|------------------|
| 18      | Gene Xkr4    | Gm210, Xkr4,    | ix Kell blood group precursor related family member   | NM_001011874.1   |
| 18      | Gene Gm1056  | ENSMUSG000      | (predicted gene 10568                                 | XR_140426.1, XR_ |
| 28      | Gene Mrpl15  | Rpml7, Mrpl15   | mitochondrial ribosomal protein L15                   | NM_001177658.1   |
| 27      | Gene Atp6v1h | Atp6v1h,        | 0710 ATPase, H+ transporting, lysosomal V1 subunit H  | NM_133826.4      |
| 22      | Gene Npbwr1  | Npbwr1, Gpr7,   | neuropeptides B/W receptor 1                          | NM_010342.1      |
| 26      | Gene Rb1cc1  | LaXp180,        | 5930 RB1-inducible coiled-coil 1                      | NM_009826.4      |
| 56      | Gene Rrs1    | Rrs1, D1Ert     | 7C RRS1 ribosome biogenesis regulator homolog (S. cer | NM_021511.2      |
| 56      | Gene Adhfe1  | Adh8, Adhfe1,   | alcohol dehydrogenase, iron containing, 1             | NM_175236.4, NR  |
| 23      | Gene Mybl1   | A-myb, G1-41    | 5 myeloblastosis oncogene-like 1                      | NM_008651.2      |
| 26      | Gene Vcpip1  | 5730421J18Ri    | valosin containing protein (p97)/p47 complex intera   | NM_173443.2      |
| 26      | Gene 1700034 | 1700034P13Ri    | RIKEN cDNA 1700034P13 gene                            | NR_040462.1      |
| 32      | Gene Mcmdc2  | Mcmdc2,         | 603C minichromosome maintenance domain containing 2   | NM_177722.3      |
| 32      | Gene Snhg6   | 1110008H02Ri    | small nucleolar RNA host gene (non-protein coding)    | NR_024067.2      |
| 32      | Gene Snord87 | MBII-276,       | Sno small nucleolar RNA, C/D box 87                   | NR_004410.1      |
| 21      | Gene Gm1056  | ENSMUSG000      | (predicted gene 10567                                 | XR_140429.1, XR_ |
| 21      | Gene Tcf24   | Tcf24, Gm233    | (transcription factor 24                              | XM_003688767.1,  |
| 21      | Gene Ppp1r42 | TLRR, Ppp1r42   | protein phosphatase 1, regulatory subunit 42          | NM_145692.1, NM  |
| 24      | Gene Cops5   | Cops5, Jab1, S  | 4 COP9 (constitutive photomorphogenic) homolog, su    | NM_013715.1      |
| 24      | Gene Csp1    | 2310020J12Ri    | centrosome and spindle pole associated protein 1      | NM_026493.3      |
| 23      | Gene Arfgef1 | Arfgef1, D730   | C ADP-ribosylation factor guanine nucleotide-exchang  | NM_001102430.1   |
| 25      | Gene Prex2   | D430013K02,     | phosphatidylinositol-3,4,5-trisphosphate-dependent    | NM_029525.1, NM  |
| 24      | Gene Ncoa2   | SRC-2,          | 953009 nuclear receptor coactivator 2                 | NM_008678.2, NM  |
| 21      | Gene Eya1    | Eya1, bor       | eyes absent 1 homolog (Drosophila)                    | NM_010164.2, NM  |
| 22      | Gene Sbspon  | Sbspon, Rresp   | somatomedin B and thrombospondin, type 1 domai        | NM_001033288.3   |
| 41      | Gene Rpl7    | Rpl7, MGC102    | ribosomal protein L7                                  | NM_011291.5      |
| 41      | Gene Rdh10   | AI875664, AW    | retinol dehydrogenase 10 (all-trans)                  | NM_133832.3      |
| 27      | Gene Ube2w   | 6130401J04Ri    | ubiquitin-conjugating enzyme E2W (putative)           | NM_001271016.1   |
| 25      | Gene Jph1    | JP-1, Jp1, Jph1 | junctionophilin 1                                     | NM_020604.2      |
| 28      | Gene Mcm3    | Mcmd, C8035     | (minichromosome maintenance deficient 3 (S. cerevi    | NM_008563.2      |
| 21      | Gene Tram2   | MGC25725, C     | 3 translocating chain-associating membrane protein 2  | NM_177409.3      |
| 26      | Gene B3gat2  | B3gat2, KIAA1   | beta-1,3-glucuronyltransferase 2 (glucuronosyltrans   | NM_172124.2      |
| 24      | Gene Fam135  | Fam135a,        | 492: family with sequence similarity 135, member A    | NM_026604.4      |
| 18      | Gene Col19a1 | Col19a1         |                                                       | NM_007733.2      |
| 31      | Gene Ptp4a1  | MGC102117,      | protein tyrosine phosphatase 4a1                      | NM_011200.2      |
| 21      | Gene Prim2   | AI323589, Prin  | DNA primase, p58 subunit                              | NM_008922.1      |
| 21      | Gene 1700001 | 1700001G17Ri    | RIKEN cDNA 1700001G17 gene                            | NR_033199.1      |
| 29      | Gene Bag2    | BC016230, MC    | BCL2-associated athanogene 2                          | NM_145392.2      |
| 30      | Gene Zfp451  | Kiaa0576-hp,    | zinc finger protein 451                               | NM_133817.2      |
| 24      | Gene Arhgef4 | Asef, Arhgef4,  | Rho guanine nucleotide exchange factor (GEF) 4        | NM_183019.2      |
| 47      | Gene Hs6st1  | 6Ost1, Hs6st1   | heparan sulfate 6-O-sulfotransferase 1                | NM_015818.2      |
| 30      | Gene Arid5a  | Mrf1, D43002    | AT rich interactive domain 5A (MRF1-like)             | NM_001172205.1,  |
| 19      | Gene Kansl3  | AI431067, 493   | KAT8 regulatory NSL complex subunit 3                 | NM_172652.3      |
| 36      | Gene Cnnm4   | Cnnm4,          | 54304 cyclin M4                                       | NM_033570.2      |



|    |              |                                                                           |                  |
|----|--------------|---------------------------------------------------------------------------|------------------|
| 36 | Gene Cnnm3   | Cnnm3, Acdp3 cyclin M3                                                    | NM_053186.2, NM  |
| 43 | Gene Ankrd39 | Ankrd39, 9130 ankyrin repeat domain 39                                    | NM_026241.3      |
| 43 | Gene Sema4c  | mKIAA1739, Sema domain, immunoglobulin domain (Ig), transmembrane         | NM_001126047.1   |
| 43 | Gene Fam178B | MGC60970, M family with sequence similarity 178, member B                 | NM_201365.2, NM  |
| 23 | Gene Cox5b   | MGC117683, Cytochrome c oxidase subunit Vb                                | NM_009942.2      |
| 23 | Gene Actr1b  | MGC36526, Actin-related protein 1B, centractin beta                       | NM_146107.2      |
| 26 | Gene Tmem131 | YR-23, CC28, T transmembrane protein 131                                  | NM_018872.2      |
| 29 | Gene Inpp4a  | D130048C09Ri inositol polyphosphate-4-phosphatase, type I                 | NM_172971.2, NM  |
| 29 | Gene Coa5    | 1700001A24Ri cytochrome C oxidase assembly factor 5                       | NM_198006.4      |
| 29 | Gene Unc50   | UNCL, URP, Ur unc-50 homolog (C. elegans)                                 | NM_026123.3      |
| 29 | Gene Mgat4a  | 9530018I07Ri mannoside acetylglucosaminyltransferase 4, isoenzyme         | NM_173870.2      |
| 25 | Gene Txndc9  | Txndc9, AI098I thioredoxin domain containing 9                            | NM_172054.4      |
| 25 | Gene Eif5b   | BC018347, AOEukaryotic translation initiation factor 5B                   | NM_198303.2      |
| 21 | Gene Rev1    | 1110027I23Ri REV1 homolog (S. cerevisiae)                                 | NM_019570.3      |
| 24 | Gene Aff3    | A730046J16, AAF4/FMR2 family, member 3                                    | NM_010678.2      |
| 19 | Gene Pdcl3   | 1110061A19Ri phosphoducin-like 3                                          | NM_026850.4      |
| 35 | Gene Npas2   | MGC129355, Neuronal PAS domain protein 2                                  | NM_008719.2      |
| 35 | Gene Rpl31   | MGC107628, Ribosomal protein L31                                          | NM_053257.3, NM  |
| 35 | Gene Tbc1d8  | Tbc1d8, HBLP1TBC1 domain family, member 8                                 | NM_018775.4      |
| 21 | Gene Map4k4  | AU045934, Mitogen-activated protein kinase kinase kinase kinase           | NM_008696.2, NM  |
| 27 | Gene Mrps9   | mg637, Mrps9 mitochondrial ribosomal protein S9                           | NM_023514.4      |
| 21 | Gene Fhl2    | Fhl2, C76204, Four and a half LIM domains 2                               | NM_010212.3      |
| 29 | Gene Nck2    | 4833426I10Ri non-catalytic region of tyrosine kinase adaptor protein      | NM_010879.3      |
| 25 | Gene Tex30   | MGC118304, Testis expressed 30                                            | NM_029368.1      |
| 25 | Gene Kdelc1  | EP58, Kdelc1, KDEL (Lys-Asp-Glu-Leu) containing 1                         | NM_023645.3      |
| 23 | Gene Bivm    | AI854267, Bivm basic, immunoglobulin-like variable motif containing       | NM_144558.4      |
| 23 | Gene Ercc5   | Xpg, Ercc5, Mammalian excision repair cross-complementing rodent repair c | NM_011729.2      |
| 27 | Gene Myo1b   | myosin-1b, AA myosin IB                                                   | NM_010863.3, NM  |
| 24 | Gene Glis    | Gls, 6330442B glutaminase                                                 | NM_001081081.2   |
| 31 | Gene Tmem194 | 9830163O08, Transmembrane protein 194B                                    | NM_001142647.1,  |
| 30 | Gene Stk17b  | AI120141, Dual serine/threonine kinase 17b (apoptosis-inducing)           | NM_133810.3      |
| 23 | Gene Ankrd44 | E130014H08Ri ankyrin repeat domain 44                                     | NM_001081433.3   |
| 32 | Gene Sf3b1   | SAP155, Targ4 splicing factor 3b, subunit 1                               | NM_031179.2      |
| 24 | Gene Coq10b  | AV002237, Coenzyme Q10 homolog B (S. cerevisiae)                          | NM_026424.3, NM  |
| 51 | Gene Hspd1   | Hspd1, Hsp60, heat shock protein 1 (chaperonin)                           | NM_010477.4      |
| 51 | Gene Hspe1   | mt-cpn10, 10k heat shock protein 1 (chaperonin 10)                        | NM_008303.4      |
| 32 | Gene Mob4    | Mobk13, Prei3, MOB family member 4, phocein                               | NM_025283.3      |
| 45 | Gene Gm1056  | EG628004, ENTPD1 predicted gene 10561                                     | XR_168381.1, XR_ |
| 45 | Gene Mars2   | MetRS, Mars2, methionine-tRNA synthetase 2 (mitochondrial)                | NM_175439.3      |
| 25 | Gene Plcl1   | Plcl1, PLCE, Phospholipase C-like 1                                       | NM_001114663.1   |
| 28 | Gene Satb2   | Satb2, mKIAA1 special AT-rich sequence binding protein 2                  | NM_139146.2      |
| 28 | Gene 9130024 | 9130024F11Ri RIKEN cDNA 9130024F11 gene                                   | NR_024325.1, NR_ |
| 31 | Gene 4930558 | 4930558J18Ri RIKEN cDNA 4930558J18 gene                                   | NR_037999.1      |
| 31 | Gene 1700066 | 1700066M21Ri RIKEN cDNA 1700066M21 gene                                   | NM_028546.1      |
| 31 | Gene Tyw5    | MGC117744, Tyrosine-tRNA synthetizing protein 5                           | NM_001037742.2   |
| 24 | Gene 9430016 | 9430016H08Ri RIKEN cDNA 9430016H08 gene                                   | NM_001081181.2   |
| 30 | Gene Spats2  | AW413586, Apatogenesis associated, serine-rich 2-like                     | NM_144882.4, NM  |

|    |                   |                                                                   |                  |
|----|-------------------|-------------------------------------------------------------------|------------------|
| 19 | Gene Kctd18       | Kctd18, 65304 potassium channel tetramerisation domain containi   | NM_001159864.1   |
| 36 | Gene Sgol2        | AV008062, 57: shugoshin-like 2 (S. pombe)                         | NM_199007.2, NM  |
| 25 | Gene Gm6860       | EG628262, Gr ribosomal protein S27 pseudogene                     |                  |
| 25 | Gene Bzw1         | mKIAA0005, B: basic leucine zipper and W2 domains 1               | NM_025824.3      |
| 36 | Gene Clk1         | Clk1, STY CDC-like kinase 1                                       | NR_027853.1, NM  |
| 36 | Gene Ppil3        | 2310076N22Ri peptidylprolyl isomerase (cyclophilin)-like 3        | NM_027374.3, NM  |
| 27 | Gene Orc2         | Orc2, AU0415: origin recognition complex, subunit 2               | NM_008765.2, NM  |
| 27 | Gene Gm1583       | C130065N10Ri predicted gene 15834                                 | XR_107316.1, XR_ |
| 22 | Gene Cflar        | Gm9845, MRITCASP8 and FADD-like apoptosis regulator               | NM_207653.3, NM  |
| 26 | Gene Trak2        | AI480836, mKI trafficking protein, kinesin binding 2              | NM_172406.3      |
| 26 | Gene Stradb       | ILPIPA, Syradb. STE20-related kinase adaptor beta                 | NM_172656.5      |
| 25 | Gene Als2         | Alsin, 3222402 amyotrophic lateral sclerosis 2 (juvenile)         | NM_001159948.2   |
| 31 | Gene Fzd7         | Fzd7, Fz7 frizzled homolog 7 (Drosophila)                         | NM_008057.3      |
| 22 | Gene Sumo1        | GMP1, SENTRI SMT3 suppressor of mif two 3 homolog 1 (yeast)       | NM_009460.2      |
| 26 | Gene Nop58        | nop5, Nop58, INOP58 ribonucleoprotein                             | NM_018868.2      |
| 26 | Gene Snord70      | MBII-234, Snoi small nucleolar RNA, C/D box 70                    | NR_028554.1      |
| 32 | Gene Bmpr2        | AW546137, Gr bone morphogenetic protein receptor, type II (serin  | NM_007561.3      |
| 31 | Gene Fam117I      | Fam117b, 633i family with sequence similarity 117, member B       | NM_001037725.2   |
| 23 | Gene Raph1        | 9430025M21R Ras association (RalGDS/AF-6) and pleckstrin homol    | NM_001045513.3   |
| 24 | Gene Pard3b       | 2810455B10Ri par-3 partitioning defective 3 homolog B (C. elegans | NM_001081050.2   |
| 22 | Gene Nrp2         | Np-2, Nrp2, N: neuropilin 2                                       | NM_001077403.1   |
| 20 | Gene Ndufs1       | MGC7850, 583 NADH dehydrogenase (ubiquinone) Fe-S protein 1       | NM_145518.2, NM  |
| 20 | Gene Eef1b2       | Eef1b, Eef1b2, eukaryotic translation elongation factor 1 beta 2  | NM_018796.3      |
| 20 | Gene Snora41      | MBI-83, Snora small nucleolar RNA, H/ACA box 41                   | NR_028558.1      |
| 20 | Gene Gpr1         | MGC41704, G: G protein-coupled receptor 1                         | NM_146250.1      |
| 20 | Gene Zdbf2        | Zdbf2, 933010 zinc finger, DBF-type containing 2                  | NM_028673.1, NM  |
| 34 | Gene Klf7         | Klf7, 9830124F Kruppel-like factor 7 (ubiquitous)                 | NM_033563.2      |
| 20 | Gene Creb1        | Creb, Creb1, 2: cAMP responsive element binding protein 1         | NM_133828.2, NM  |
| 27 | Gene Mettl21i     | Fam119a, Met methyltransferase like 21A                           | NM_025964.3      |
| 25 | Gene 2810408      | 2810408I11Ri RIKEN cDNA 2810408I11 gene                           | NR_038009.1      |
| 30 | Gene Ccnyl1       | Ccnyl1, 96300: cyclin Y-like 1                                    | NM_001097644.1   |
| 30 | Gene Fzd5         | 5330434N09Ri frizzled homolog 5 (Drosophila)                      | NM_001042659.1   |
| 22 | Gene Idh1         | Idh1, E030024. isocitrate dehydrogenase 1 (NADP+), soluble        | NM_010497.3, NM  |
| 22 | Gene Pipfyve      | Pip5k3, p235, I phosphoinositide kinase, FYVE finger containing   | NM_011086.2      |
| 44 | Gene Bard1        | ENSMUSG000: BRCA1 associated RING domain 1                        | NM_007525.3      |
| 25 | Gene Atic         | Atic, AW2123: 5-aminoimidazole-4-carboxamide ribonucleotide fo    | NM_026195.3      |
| 22 | Gene Fn1          | Fn1, E330027Ii fibronectin 1                                      | NM_010233.1      |
| 22 | Gene Apol7d       | OTTMUSG000: apolipoprotein L 7d                                   | NR_040308.1      |
| 17 | Gene Rpl37a       | Rpl37a ribosomal protein L37a                                     | NM_009084.4      |
| 20 | Gene Igfbp2       | Igfbp2, Igfbp-2 insulin-like growth factor binding protein 2      | NM_008342.3      |
| 19 | Gene Igfbp5       | Igfbp5, AW20: insulin-like growth factor binding protein 5        | NM_010518.2      |
| 20 | Gene Tns1         | E030037J05Ri tensin 1                                             | NM_027884.3      |
| 17 | Gene Rufy4        | Rufy4, F93004. RUN and FYVE domain containing 4                   | NM_001034060.3,  |
| 23 | Gene Arpc2        | 34kDa, 22100: actin related protein 2/3 complex, subunit 2        | NM_029711.1      |
| 27 | Gene Pnkd         | Brp17, AI8542. paroxysmal nonkinesinogenic dyskinesia             | NM_001039509.1   |
| 27 | Gene Tmbim1       | AU024746, RE: transmembrane BAX inhibitor motif containing 1      | NM_027154.5      |
| 27 | Gene LOC101055811 | uncharacterized LOC101055811                                      | XM_003945311.1,  |

|    |               |                                                                        |                  |
|----|---------------|------------------------------------------------------------------------|------------------|
| 29 | Gene Slc11a1  | Ity, ity, Bcg, Nr solute carrier family 11 (proton-coupled divalent me | NM_013612.2      |
| 29 | Gene Ctdsp1   | GIP, Nif3, Ctds CTD (carboxy-terminal domain, RNA polymerase II, r     | NM_153088.2      |
| 29 | Gene Mir26b   | Mirn26b, Mir2 microRNA 26b                                             | NR_029743.1      |
| 30 | Gene Usp37    | C330008N13Ri ubiquitin specific peptidase 37                           | NM_176972.4      |
| 30 | Gene Rqcd1    | Rqcd1, 26100C rcd1 (required for cell differentiation) homolog 1 (S.   | NM_021383.5      |
| 20 | Gene Bcs1l    | Bcs1l, 913002:BCS1-like (yeast)                                        | NM_025784.4      |
| 20 | Gene Rnf25    | 0610009H16Ri ring finger protein 25                                    | NM_021313.2      |
| 20 | Gene Stk36    | Fused, FU, KIAA1278, B930045J24, Stk36, 1700112N14Rik, mKIAA1          | NM_175031.3      |
| 22 | Gene Cyp27a1  | Cyp27a1, Cyp2 cytochrome P450, family 27, subfamily a, polypeptic      | NM_024264.4      |
| 18 | Gene Ihh      | Ihh                                                                    | NM_010544.2      |
| 27 | Gene Slc23a3  | MGC143682, Solute carrier family 23 (nucleobase transporters), n       | NM_194333.3      |
| 27 | Gene Cnppd1   | Cnppd1, AU04 cyclin Pas1/PHO80 domain containing 1                     | NM_026977.2      |
| 27 | Gene Fam134   | Fam134a, MG family with sequence similarity 134, member A              | NM_170755.2      |
| 30 | Gene Zfand2b  | C81256, Zfand zinc finger, AN1 type domain 2B                          | NM_026846.3, NM  |
| 30 | Gene Abcb6    | 1200005B17Ri ATP-binding cassette, sub-family B (MDR/TAP), men         | NM_023732.2      |
| 30 | Gene Atg9a    | AU019532, Atg autophagy related 9A                                     | NM_001003917.3   |
| 32 | Gene Glb1l    | Glb1l, 483340:galactosidase, beta 1-like                               | NM_029010.1      |
| 32 | Gene Stk16    | EDPK, Krct, Stk serine/threonine kinase 16                             | NM_011494.5      |
| 32 | Gene Tuba4a   | M[a]4, Tuba4, tubulin, alpha 4A                                        | NM_009447.3      |
| 32 | Gene A630095  | A630095N17R RIKEN cDNA A630095N17 gene                                 | NM_001243090.1,  |
| 18 | Gene Dnajb2   | 2700059H22Ri DnaJ (Hsp40) homolog, subfamily B, member 2               | NM_020266.2, NM  |
| 18 | Gene Ptpn     | mIA-A, mKIAA: protein tyrosine phosphatase, receptor type, N           | NM_008985.2      |
| 21 | Gene Des      | Des desmin                                                             | NM_010043.1      |
| 21 | Gene Gm1517   | OTTMUSG000i predicted gene 15179                                       | NR_037976.1      |
| 21 | Gene Spcg     | Apeg1, SPEGal SPEG complex locus                                       | NM_001085371.1   |
| 31 | Gene Asic4    | Asic4, BNAC4, acid-sensing (proton-gated) ion channel family mem       | NM_183022.3      |
| 31 | Gene Chpf     | D1Bwg1363e, chondroitin polymerizing factor                            | NM_001001565.2,  |
| 31 | Gene Tmem19   | A230078I05Ri transmembrane protein 198                                 | NM_177056.4      |
| 43 | Gene Obsl1    | Obsl1, AW822: obscurin-like 1                                          | NM_178884.5      |
| 43 | Gene Inha     | AW555078, Inl inhibin alpha                                            | NM_010564.4      |
| 18 | Gene Stk11ip  | LKB1IP, Stk11i: serine/threonine kinase 11 interacting protein         | NM_027886.3      |
| 18 | Gene Slc4a3   | Ae3, Slc4a3, A: solute carrier family 4 (anion exchanger), member 3    | NM_009208.3      |
| 19 | Gene Gm2102   | Gm2102 predicted gene 2102                                             | XM_001472451.2   |
| 32 | Gene Utp14b   | jsd, 4932411L: UTP14, U3 small nucleolar ribonucleoprotein, homo       | NM_001001981.3,  |
| 32 | Gene Acsl3    | Acsl3, C85929, acyl-CoA synthetase long-chain family member 3          | NM_028817.3, NM  |
| 18 | Gene Ap1s3    | Ap1s3, Jr2, [s]: adaptor-related protein complex AP-1, sigma 3         | NM_183027.2      |
| 31 | Gene Wdfy1    | KIAA1435, 170 WD repeat and FYVE domain containing 1                   | NM_001111279.1   |
| 31 | Gene Gm1055   | ENSMUSG000i predicted gene 10555                                       | XR_140443.1, XR_ |
| 22 | Gene Mrpl44   | 5730593H20Ri mitochondrial ribosomal protein L44                       | NM_001081210.1   |
| 20 | Gene Serpine2 | B230326M24R serine (or cysteine) peptidase inhibitor, clade E, mer     | NM_009255.4      |
| 20 | Gene Dock10   | Dock10, Jr4, Zi dedicator of cytokinesis 10                            | NM_175291.3      |
| 25 | Gene Irs1     | G972R, IRS-1, I insulin receptor substrate 1                           | NM_010570.4      |
| 25 | Gene Gm1953   | Gm19537 predicted gene, 19537                                          | XR_140445.1, XR_ |
| 32 | Gene Agfg1    | D730048C23Ri ArfGAP with FG repeats 1                                  | NM_010472.2      |
| 37 | Gene Trip12   | AA410158, 67: thyroid hormone receptor interactor 12                   | NM_133975.4      |
| 37 | Gene Fbxo36   | 1110020F21Ri F-box protein 36                                          | NM_025386.3      |
| 19 | Gene Cab39    | AA960512, AA calcium binding protein 39                                | NM_133781.4      |

|    |               |                                                                       |                 |
|----|---------------|-----------------------------------------------------------------------|-----------------|
| 29 | Gene 2810459  | 2810459M11R RIKEN cDNA 2810459M11 gene                                | NM_001144992.1, |
| 29 | Gene Psmd1    | 2410026J11Ril proteasome (prosome, macropain) 26S subunit, non        | NM_027357.2     |
| 48 | Gene Ncl      | D0Nds28, Ncl, nucleolin                                               | NM_010880.3     |
| 48 | Gene Snora75  | MBI-55, Snora small nucleolar RNA, H/ACA box 75                       | NR_028478.1     |
| 48 | Gene Snord82  | Snord82, U82, small nucleolar RNA, C/D box 82                         | NR_002851.1     |
| 48 | Gene C130036  | C130036L24Ril RIKEN cDNA C130036L24 gene                              | NR_015507.2     |
| 39 | Gene Ptma     | MGC103390, F prothymosin alpha                                        | NM_008972.2     |
| 23 | Gene Nppc     | Nppc, CNP, M(natriuretic peptide type C                               | NM_010933.5     |
| 19 | Gene Efhd1    | 4931430I01Rik EF hand domain containing 1                             | NM_028889.2     |
| 24 | Gene Gigyf2   | BC006835, AW GRB10 interacting GYF protein 2                          | NM_146112.4, NM |
| 28 | Gene Atg16l1  | Apg16l, AI035(atophagy related 16-like 1 (S. cerevisiae)              | NM_029846.4, NM |
| 15 | Gene Usp40    | B230215L03Ril ubiquitin specific peptidase 40                         | NM_001033291.2  |
| 22 | Gene Arl4c    | Arl7, A630084ADP-ribosylation factor-like 4C                          | NM_177305.4     |
| 28 | Gene Sh3bp4   | AI594717, BO(SH3-domain binding protein 4                             | NM_133816.2     |
| 35 | Gene Agap1    | Ggap1, Centg2 ArfGAP with GTPase domain, ankyrin repeat and PH        | NM_178119.3, NM |
| 18 | Gene Gbx2     | Stra7, Gbx-2, N(gastrulation brain homeobox 2                         | NM_010262.3     |
| 26 | Gene Cops8    | Csn8, Sgn8, Co COP9 (constitutive photomorphogenic) homolog, su       | NM_133805.3     |
| 22 | Gene Lrrfip1  | Fliiap1, Lrrfip1, leucine rich repeat (in FLII) interacting protein 1 | NM_001111311.1  |
| 33 | Gene Ube2f    | Ube2f, 251001 ubiquitin-conjugating enzyme E2F (putative)             | NM_026454.3     |
| 21 | Gene Espnl    | Gm556, Espnl espin-like                                               | NM_001033292.3  |
| 21 | Gene Klhl30   | 4631423F02Rik, MGC143856, Klhl30                                      | NM_027551.2     |
| 21 | Gene Fam132l  | 4832406C22, F family with sequence similarity 132, member B           | NM_173395.2     |
| 29 | Gene Ilkap    | 0710007A14Ri integrin-linked kinase-associated serine/threonine p     | NM_023343.2     |
| 29 | Gene 1700020  | 1700020N18Ril RIKEN cDNA 1700020N18 gene                              | NR_026924.1     |
| 26 | Gene Hes6     | Hes6, AI32689 hairy and enhancer of split 6 (Drosophila)              | NM_019479.3     |
| 44 | Gene Per2     | mPer2, Per2, n period circadian clock 2                               | NM_011066.3     |
| 27 | Gene Traf3ip1 | Traf3ip1, MGC TRAF3 interacting protein 1                             | NM_028718.2     |
| 27 | Gene Twist2   | Twist2, Dermo twist basic helix-loop-helix transcription factor 2     | NM_007855.2     |
| 29 | Gene Ndufa10  | Ndufa10, 2900 NADH dehydrogenase (ubiquinone) 1 alpha subcom          | NM_024197.1     |
| 29 | Gene Olfr141f | Olfr1416, MOF olfactory receptor 1416                                 | NM_147038.1     |
| 24 | Gene Myeov2   | Myeov2, 1110i myeloma overexpressed 2                                 | NM_001163425.1  |
| 24 | Gene Otos     | Otos, OTOSP otospiralin                                               | NM_153114.2     |
| 24 | Gene Gpc1     | AI462976, Gpc glypican 1                                              | NM_016696.4     |
| 29 | Gene Ankmy1   | Ankmy1, 4930 ankyrin repeat and MYND domain containing 1              | NM_172850.3     |
| 29 | Gene Dusp28   | AV005521, 07: dual specificity phosphatase 28                         | NM_175118.3     |
| 29 | Gene Rnpepl1  | 1110014H17Ri arginyl aminopeptidase (aminopeptidase B)-like 1         | NM_181405.4     |
| 42 | Gene E030010  | E030010N08Ril RIKEN cDNA E030010N08 gene                              | XM_977156.2, XM |
| 42 | Gene Sned1    | AI642697, D43 sushi, nidogen and EGF-like domains 1                   | NM_172463.4     |
| 40 | Gene Pask     | Pask, mKIAA01PAS domain containing serine/threonine kinase            | NM_080850.2     |
| 40 | Gene Ppp1r7   | SDS22, Ppp1r7 protein phosphatase 1, regulatory (inhibitor) subuni    | NM_023200.2     |
| 28 | Gene Hdlbp    | Hdlbp, AA960 high density lipoprotein (HDL) binding protein           | NM_133808.4     |
| 28 | Gene Sept2    | Sept2, AW208 septin 2                                                 | NM_010891.2, NM |
| 24 | Gene Stk25    | Ste20-like, AU(serine/threonine kinase 25 (yeast)                     | NM_021537.3     |
| 32 | Gene Bok      | Bok, AI847676 BCL2-related ovarian killer protein                     | NM_016778.2     |
| 32 | Gene Thap4    | Thap4, 201032 THAP domain containing 4                                | NM_025920.3     |
| 32 | Gene Atg4b    | AW048066, At autophagy related 4B, cysteine peptidase                 | NM_174874.3     |
| 35 | Gene Dtymk    | mtmk, AU044 deoxythymidylate kinase                                   | NM_001105667.1, |

|    |               |                                                                     |                 |
|----|---------------|---------------------------------------------------------------------|-----------------|
| 35 | Gene Ing5     | Ing5, 1810018 inhibitor of growth family, member 5                  | NM_025454.2     |
| 29 | Gene Fam174   | Fam174, 2310 family with sequence similarity 174, member A          | NM_026321.4     |
| 29 | Gene D1Ertd6  | AI987691, D1E DNA segment, Chr 1, ERATO Doi 622, expressed          | NM_133825.3     |
| 24 | Gene Pign     | Pign, Gm2030 phosphatidylinositol glycan anchor biosynthesis, cla   | NM_013784.3     |
| 24 | Gene 2310035  | 2310035C23Ri RIKEN cDNA 2310035C23 gene                             | NM_173187.3, NM |
| 44 | Gene Gm7160   | Gm7160, EG63 predicted gene 7160                                    | XM_921685.3, XM |
| 44 | Gene Zcchc2   | AW212015, 99 zinc finger, CCHC domain containing 2                  | NM_001122675.1  |
| 32 | Gene Gm2075   | Gm20753 predicted gene, 20753                                       | NR_040630.1     |
| 32 | Gene Phlpp1   | mKIAA0606, PIPH domain and leucine rich repeat protein phosphat     | NM_133821.3     |
| 28 | Gene Vps4b    | Vps4b, 803048 vacuolar protein sorting 4b (yeast)                   | NM_009190.2     |
| 22 | Gene Dsel     | Dsel, 9330132 dermatan sulfate epimerase-like                       | NM_001081316.1  |
| 21 | Gene Tsn      | Tsn, AU040286 translin                                              | NM_011650.3     |
| 25 | Gene Gli2     | AW546128, GI GLI-Kruppel family member GLI2                         | NM_001081125.1  |
| 42 | Gene Inhbb    | Inhbb                                                               | NM_008381.3     |
| 24 | Gene Ralb     | Ralb, 5730472 v-ral simian leukemia viral oncogene homolog B (ras   | NM_022327.5     |
| 38 | Gene Tmem18   | MGC25511, 25 transmembrane protein 185B                             | NM_146103.2     |
| 23 | Gene Epb4.115 | AL022914, E23 erythrocyte protein band 4.1-like 5                   | NM_145506.4, NM |
| 23 | Gene Ptpn4    | TEP, PTPMEG, protein tyrosine phosphatase, non-receptor type 4      | NM_019933.2     |
| 31 | Gene Ddx18    | MGC117904, [ DEAD (Asp-Glu-Ala-Asp) box polypeptide 18              | NM_025860.3     |
| 20 | Gene Actr3    | MGC118188, ARP3 actin-related protein 3                             | NM_023735.2, NM |
| 25 | Gene Slc35f5  | Slc35f5, 13000 solute carrier family 35, member F5                  | NM_028787.4     |
| 16 | Gene Lypd1    | C530008016Ri Ly6/Plaur domain containing 1                          | NM_145100.3     |
| 16 | Gene Nckap5   | MGC90557, NCK-associated protein 5                                  | NM_001081756.1, |
| 27 | Gene Mgat5    | AI480971, 493 mannoside acetylglucosaminyltransferase 5             | NM_145128.3     |
| 24 | Gene Zranb3   | 4933425L19Ri zinc finger, RAN-binding domain containing 3           | NM_027678.2     |
| 31 | Gene R3hdm1   | R3hdm1, R3hd R3H domain containing 1                                | NM_181750.2     |
| 31 | Gene Ubxn4    | mKIAA0242, 1: UBX domain protein 4                                  | NM_026390.2     |
| 26 | Gene Mcm6     | ASP-I1, Mcm6, minichromosome maintenance deficient 6 (MIS5 ho       | NM_008567.1     |
| 26 | Gene Dars     | Dars, 5730439 aspartyl-tRNA synthetase                              | NM_145507.2, NM |
| 27 | Gene Pfkfb2   | 4930568D07Ri 6-phosphofructo-2-kinase/fructose-2,6-biphosphata      | NM_008825.4, NM |
| 27 | Gene Yod1     | Hshin7, Yod1, YOD1 OTU deubiquitinating enzyme 1 homologue (S       | NM_178691.4     |
| 29 | Gene Mapkap1  | Rps6kc1, MK-2 MAP kinase-activated protein kinase 2                 | NM_008551.1     |
| 32 | Gene Dyrk3    | Dyrk3, BC0067 dual-specificity tyrosine-(Y)-phosphorylation regulat | NM_145508.2     |
| 31 | Gene Rassf5   | Nore1A, Maxp Ras association (RalGDS/AF-6) domain family memb       | NM_018750.3     |
| 31 | Gene Ikbke    | IKK-i, Ikki, Ikbk inhibitor of kappaB kinase epsilon                | NM_019777.3     |
| 33 | Gene Srgap2   | FBP2, srGAP3, SLIT-ROBO Rho GTPase activating protein 2             | NM_001081011.2  |
| 33 | Gene Fam72a   | MGC117955, 2 family with sequence similarity 72, member A           | NM_175382.3     |
| 28 | Gene Nucks1   | AI647518, 843 nuclear casein kinase and cyclin-dependent kinase s   | NM_175294.3, NM |
| 40 | Gene Elk4     | Sap1, A130026 ELK4, member of ETS oncogene family                   | NM_007923.2     |
| 27 | Gene Klhdc8a  | A630065K24Ri kelch domain containing 8A                             | NM_144810.5     |
| 27 | Gene Nuak2    | mKIAA0537, SNUAK family, SNF1-like kinase, 2                        | NM_028778.4, NM |
| 17 | Gene Tmcc2    | 1110063G11Ri transmembrane and coiled-coil domains 2                | NM_178874.2     |
| 23 | Gene Dstyk    | A930019K20Ri dual serine/threonine and tyrosine protein kinase      | NM_172516.4     |
| 24 | Gene Lrrn2    | 5730406J09Ri leucine rich repeat protein 2, neuronal                | NM_010732.4     |
| 20 | Gene Pik3c2b  | PI3KC2beta, C: phosphoinositide-3-kinase, class 2, beta polypeptide | NM_001099276.2  |
| 37 | Gene Ppp1r15  | 1810033K10Ri protein phosphatase 1, regulatory (inhibitor) subuni   | NM_133819.3     |
| 18 | Gene Golt1a   | 0610012C01Ri golgi transport 1 homolog A (S. cerevisiae)            | NM_026680.4     |

|    |                   |                                                                         |                  |
|----|-------------------|-------------------------------------------------------------------------|------------------|
| 18 | Gene Kiss1        | metastatin, Kis KiSS-1 metastasis-suppressor                            | NM_178260.3      |
| 25 | Gene Ren1         | Ren-A, Ren, Re renin 1 structural                                       | NM_031192.3      |
| 25 | Gene Etnk2        | Etnk2, 493341 ethanolamine kinase 2                                     | NM_175443.5      |
| 30 | Gene Sox13        | Sox-13, Sox13, SRY-box containing gene 13                               | NM_011439.2      |
| 32 | Gene Snrpe        | SME, AL02264 small nuclear ribonucleoprotein E                          | NM_009227.3      |
| 32 | Gene Zc3h11a      | 5730454B08Ri zinc finger CCCH type containing 11A                       | NM_144530.5      |
| 23 | Gene Btg2         | Pc3, APRO1, A. B cell translocation gene 2, anti-proliferative          | NM_007570.2      |
| 26 | Gene Cyb5r1       | C80155, Nqo3:cytochrome b5 reductase 1                                  | NM_028057.2      |
| 26 | Gene Adipor1      | ACDCR1, CGI-4 adiponectin receptor 1                                    | NM_028320.3      |
| 30 | Gene Klhl12       | Klhl12, C3ip1, MGC7076                                                  | NM_153128.2      |
| 30 | Gene Rabif        | AW549708, AI RAB interacting factor                                     | NM_145510.1      |
| 20 | Gene 493144C      | 4931440L10Ri RIKEN cDNA 4931440L10 gene                                 | NM_001145300.1   |
| 45 | Gene Kdm5b        | mKIAA4034, P1lysine (K)-specific demethylase 5B                         | NM_152895.2      |
| 24 | Gene Ppp1r12      | AI132431, B23 protein phosphatase 1, regulatory (inhibitor) subunit     | NM_001081307.1   |
| 24 | Gene Ube2t        | Ube2t, 270008 ubiquitin-conjugating enzyme E2T (putative)               | NM_026024.2      |
| 22 | Gene Lgr6         | Lgr6, A530037 leucine-rich repeat-containing G protein-coupled receptor | NM_001033409.3   |
| 34 | Gene Ptpn7        | C920001D21Ri protein tyrosine phosphatase, non-receptor type 7          | NM_177081.3      |
| 34 | Gene Arl8a        | gie2, Arl10b, A ADP-ribosylation factor-like 8A                         | NM_026823.2      |
| 35 | Gene Rnpep        | MGC29229, Rr arginyl aminopeptidase (aminopeptidase B)                  | NM_145417.3, NM  |
| 22 | Gene Lmod1        | 9530015K06Ri leiomodulin 1 (smooth muscle)                              | NM_053106.2      |
| 22 | Gene Shisa4       | 9330132O05Ri shisa homolog 4 (Xenopus laevis)                           | NM_175259.4      |
| 22 | Gene Ipo9         | C78347, Ipo9, importin 9                                                | NM_153774.1      |
| 39 | Gene Nav1         | Nav1, C23008C neuron navigator 1                                        | NM_173437.2      |
| 39 | Gene Gm4793       | Gm4793, EG21 predicted gene 4793                                        | XR_168789.1, XR_ |
| 32 | Gene LOC101056010 | uncharacterized LOC101056010                                            | XM_003945620.1,  |
| 31 | Gene Phlda3       | Phlda3, Tih1 pleckstrin homology-like domain, family A, member          | NM_013750.2      |
| 30 | Gene Gm1585       | Gm15850, OT1 predicted gene 15850                                       | NR_046167.1, NR_ |
| 30 | Gene Kif21b       | 2610511N21Ri kinesin family member 21B                                  | NM_001039472.1   |
| 30 | Gene Camsap3      | 4930541M15R calmodulin regulated spectrin-associated protein family     | NM_001081360.1   |
| 24 | Gene 9230116      | 9230116N13Ri RIKEN cDNA 9230116N13 gene                                 | NR_024328.1      |
| 24 | Gene Ddx59        | Ddx59, 483341 DEAD (Asp-Glu-Ala-Asp) box polypeptide 59                 | NM_026500.3      |
| 29 | Gene Kif14        | Kif14, MGC185 kinesin family member 14                                  | NM_001081258.1   |
| 20 | Gene Nr5a2        | Nr5a2, D1Ertd: nuclear receptor subfamily 5, group A, member 2          | NM_030676.3, NM  |
| 29 | Gene Nek7         | AU020186, 28: NIMA (never in mitosis gene a)-related expressed kinase   | NM_021605.3      |
| 19 | Gene Lhx9         | 3110009O07Ri LIM homeobox protein 9                                     | NM_010714.3, NM  |
| 16 | Gene 2310009      | 2310009B15Ri RIKEN cDNA 2310009B15 gene                                 | NM_001081226.1   |
| 29 | Gene Zbtb41       | Zbtb41, 94300 zinc finger and BTB domain containing 41 homolog          | NM_172643.5      |
| 29 | Gene Aspm         | D330028K02Ri asp (abnormal spindle)-like, microcephaly associated       | NM_009791.4      |
| 22 | Gene Cdc73        | MGC29274, C1 cell division cycle 73, Paf1/RNA polymerase II complex     | NM_145991.1      |
| 19 | Gene Glrx2        | Glrx2, AI64571 glutaredoxin 2 (thioltransferase)                        | NM_023505.2, NM  |
| 21 | Gene Hmcn1        | EG545370, Grr hemicentin 1                                              | NM_001024720.3   |
| 36 | Gene Ivns1abp     | NS1-BP, 17001 influenza virus NS1A binding protein                      | NM_054102.2, NM  |
| 27 | Gene Fam129       | Niban, AI2563I family with sequence similarity 129, member A            | NM_022018.3      |
| 33 | Gene Edem3        | 2310050N11Ri ER degradation enhancer, mannosidase alpha-like 3          | NM_001039644.2   |
| 19 | Gene 1700025      | AV212693, 17( RIKEN cDNA 1700025G04 gene                                | NM_197990.3      |
| 25 | Gene Tsen15       | AL023077, 573 tRNA splicing endonuclease 15 homolog (S. cerevisiae)     | NM_025677.3      |
| 23 | Gene Colgalt2     | Colgalt2, AI427 collagen beta(1-O)galactosyltransferase 2               | NM_177756.4      |

|    |               |                        |                                                                          |                 |
|----|---------------|------------------------|--------------------------------------------------------------------------|-----------------|
| 31 | Gene Apobec4  | Apobec4, 4933          | apolipoprotein B mRNA editing enzyme, catalytic po                       | NM_001081197.1  |
| 31 | Gene Arpc5    | Arpc5, p16-Arc         | actin related protein 2/3 complex, subunit 5                             | NM_026369.2     |
| 22 | Gene Smg7     | 9430023P16Ri           | Smg-7 homolog, nonsense mediated mRNA decay fa                           | NM_001005507.2, |
| 26 | Gene Lamc1    | Lamb2, Lamc1           | laminin, gamma 1                                                         | NM_010683.2     |
| 20 | Gene Shcbp1l  | MGC130601, 1Shc        | SH2-domain binding protein 1-like                                        | NM_001033162.2  |
| 35 | Gene Dhx9     | RHA, NDHII, HI         | DEAH (Asp-Glu-Ala-His) box polypeptide 9                                 | NM_007842.2     |
| 40 | Gene Teddm1   | Epdd1, e9-1, T         | transmembrane epididymal protein 1                                       | NM_178244.3     |
| 40 | Gene Glul     | Glul, Glns, GS         | glutamate-ammonia ligase (glutamine synthetase)                          | NM_008131.3     |
| 20 | Gene Zfp648   | Zfp648, Gm10:          | zinc finger protein 648                                                  | NM_001204908.1  |
| 33 | Gene Ier5     | Ier5                   | immediate early response 5                                               | NM_010500.2     |
| 26 | Gene BC034095 | mKIAA1614, 6:          | cDNA sequence BC034090                                                   | XM_148974.8, XV |
| 29 | Gene Xpr1     | Rmc-1, Syg1, X         | xenotropic and polytropic retrovirus receptor 1                          | NM_011273.2     |
| 20 | Gene Lhx4     | Gsh4, Gsh-4, L         | LIM homeobox protein 4                                                   | NM_010712.2     |
| 23 | Gene Qsox1    | Qsox1, SOx, 13         | quiescin Q6 sulfhydryl oxidase 1                                         | NM_023268.2, NM |
| 23 | Gene Cep350   | 4933409L06Ril          | centrosomal protein 350                                                  | NM_001039184.1  |
| 23 | Gene Tor1aip1 | Tor1aip1, MGC          | torsin A interacting protein 1                                           | NM_144791.2, NM |
| 23 | Gene Tor1aip2 | AA103493, Lul          | torsin A interacting protein 2                                           | NM_022329.4, NM |
| 20 | Gene Abl2     | Abl1, Arg, Abl2, v-abl | Abelson murine leukemia viral oncogene 2 (arg                            | NM_009595.3, NM |
| 28 | Gene Fam20b   | C530043G21Ri           | family with sequence similarity 20, member B                             | NM_145413.4     |
| 23 | Gene Rasal2   | A330066M24R            | RAS protein activator like 2                                             | NM_177644.5     |
| 23 | Gene 2810025  | 2810025M15R            | RIKEN cDNA 2810025M15 gene                                               | NR_027984.1     |
| 25 | Gene Cacybp   | Cacybp, SIP            |                                                                          | NM_009786.2     |
| 25 | Gene Rabgap1  | 9630005B12Ri           | RAB GTPase activating protein 1-like                                     | NM_001038621.2  |
| 31 | Gene Rc3h1    | Rc3h1, 573055          | RING CCCH (C3H) domains 1                                                | NM_001024952.2  |
| 30 | Gene Zbtb37   | Zbtb37, D4300          | zinc finger and BTB domain containing 37                                 | NM_173424.3     |
| 30 | Gene Gas5     | Gas-5, MGC62           | growth arrest specific 5                                                 | NR_002840.2     |
| 30 | Gene Mir5117  | mmu-mir-5117           | microRNA 5117                                                            | NR_039577.1     |
| 30 | Gene Snord47  | Snord47, MBII          | small nucleolar RNA, C/D box 47                                          | NR_028543.1     |
| 30 | Gene Dars2    | Dars2, 583046          | aspartyl-tRNA synthetase 2 (mitochondrial)                               | NM_172644.3     |
| 19 | Gene Vamp4    | Vamp4, D1Ert           | vesicle-associated membrane protein 4                                    | NM_016796.3     |
| 26 | Gene Prrc2c   | Bat2d, E13011          | proline-rich coiled-coil 2C                                              | NM_001081290.1  |
| 26 | Gene Scyl3    | 6030457O16, 1          | SCY1-like 3 (S. cerevisiae)                                              | NM_028776.4     |
| 39 | Gene Slc19a2  | AV276020, TRI          | solute carrier family 19 (thiamine transporter), mem                     | NM_054087.2     |
| 25 | Gene Atp1b1   | Atpb, Atpb-1, 1        | ATPase, Na <sup>+</sup> /K <sup>+</sup> transporting, beta 1 polypeptide | NM_009721.5     |
| 33 | Gene Tipr1    | 1810011K17Ri           | TIP41, TOR signalling pathway regulator-like (S. cere                    | NM_145513.4     |
| 27 | Gene Mpzl1    | Mpzl1, PZR, 11         | myelin protein zero-like 1                                               | NM_001083897.1  |
| 25 | Gene Rcsd1    | A430105K13Ri           | RCS domain containing 1                                                  | NM_001038846.1  |
| 44 | Gene Pou2f1   | Pou2f1, Otf-1, POU     | domain, class 2, transcription factor 1                                  | NM_011137.3, NM |
| 23 | Gene Pogk     | mKIAA1513, 9:          | pogo transposable element with KRAB domain                               | NM_175170.4, NM |
| 26 | Gene Uck2     | AI481316, TSA          | uridine-cytidine kinase 2                                                | NM_030724.3     |
| 36 | Gene Tmco1    | Tmco1, ESTM3           | transmembrane and coiled-coil domains 1                                  | NM_001039483.1  |
| 22 | Gene Uap1     | AA420407, AA           | UDP-N-acetylglucosamine pyrophosphorylase 1                              | NM_133806.4, XM |
| 24 | Gene Nos1ap   | Capon, 63304           | nitric oxide synthase 1 (neuronal) adaptor protein                       | NM_027528.2, NM |
| 25 | Gene Atf6     | AA789574, 96:          | activating transcription factor 6                                        | NM_001081304.1  |
| 30 | Gene Dusp12   | VH1, Dusp12, 1         | dual specificity phosphatase 12                                          | NM_023173.2     |
| 24 | Gene Ppox     | Ppox, Ppo              | protoporphyrinogen oxidase                                               | NM_008911.2     |
| 24 | Gene Usp21    | W53272, Usp1           | ubiquitin specific peptidase 21                                          | NM_013919.4     |

|    |                   |                                                                      |                  |
|----|-------------------|----------------------------------------------------------------------|------------------|
| 24 | Gene Ufc1         | AA062310, EST ubiquitin-fold modifier conjugating enzyme 1           | NM_025388.2      |
| 23 | Gene Dedd         | FLDED1, CASP death effector domain-containing                        | NM_011615.3, NM  |
| 23 | Gene Nit1         | AI255805, Nit1 nitrilase 1                                           | NM_012049.2, NM  |
| 23 | Gene Pfdn2        | W48336, EST Nprefoldin 2                                             | NM_011070.3      |
| 34 | Gene Arhgap3      | mFLJ00267, M Rho GTPase activating protein 30                        | NM_001005508.2   |
| 34 | Gene Usf1         | bHLHb11, Usf1 upstream transcription factor 1                        | NM_009480.2      |
| 34 | Gene Tstd1        | EG226654, Tst thiosulfate sulfurtransferase (rhodanese)-like domain  | NM_001164525.1   |
| 20 | Gene Alyref2      | C130042O11Ri Aly/REF export factor 2                                 | NM_019484.4      |
| 24 | Gene Vangl2       | ska17, Lpp1, Lt vang-like 2 (van gogh, Drosophila)                   | NM_033509.3      |
| 27 | Gene Ncstn        | D1Dau13e, Kia nicastrin                                              | NM_021607.3      |
| 27 | Gene Copa         | xenin, AU0403 coatomer protein complex subunit alpha                 | NM_009938.4      |
| 39 | Gene Dcaf8        | Dcaf8, Wdr42a DDB1 and CUL4 associated factor 8                      | NM_153555.2      |
| 28 | Gene Igsf8        | AU041109, EM immunoglobulin superfamily, member 8                    | NM_080419.1      |
| 28 | Gene Kcnj9        | Girk3, 170008 potassium inwardly-rectifying channel, subfamily J, i  | NM_008429.2      |
| 30 | Gene Kcnj10       | Kcnj10, BIR10, potassium inwardly-rectifying channel, subfamily J, i | NM_001039484.1   |
| 30 | Gene Pigm         | AV302080, 49 phosphatidylinositol glycan anchor biosynthesis, cla    | NM_026234.4      |
| 20 | Gene Igsf9        | NRT1, Ncaml, i immunoglobulin superfamily, member 9                  | NM_033608.3, NM  |
| 20 | Gene Tagln2       | Sm22a, Sm22E transgelin 2                                            | NM_178598.2      |
| 22 | Gene Vsig8        | EG240916, Vsi V-set and immunoglobulin domain containing 8           | NM_177723.4, NR  |
| 25 | Gene Dusp23       | Dusp23, LDP-3 dual specificity phosphatase 23                        | NM_026725.2      |
| 23 | Gene Rgs7         | Rgs7                                                                 | NM_011880.3, NM  |
| 27 | Gene Opn3         | MGC124138, E opsin 3                                                 | NM_010098.2      |
| 27 | Gene Chml         | Rep2, E03000 choroideremia-like                                      | NM_021350.2      |
| 27 | Gene Wdr64        | 4930415O10Ri WD repeat domain 64                                     | NM_029453.2      |
| 23 | Gene Exo1         | Exo1, Msa, 57 exonuclease 1                                          | NM_012012.4      |
| 20 | Gene Akt3         | Nmf350, Akt3, thymoma viral proto-oncogene 3                         | NM_011785.3      |
| 29 | Gene Adss         | Adss, AS, Adss adenylsuccinate synthetase, non muscle                | NM_007422.3      |
| 28 | Gene B230369      | B230369F24Ri RIKEN cDNA B230369F24 gene                              | XR_107314.1, XR_ |
| 28 | Gene Cox20        | Fam36a, 2310 COX20 Cox2 chaperone                                    | NM_025511.2      |
| 48 | Gene Hnrnpu       | hnRNP U, AL0 heterogeneus nuclear ribonucleoprotein U                | NM_016805.2      |
| 32 | Gene Efcab2       | D830011E08Ri EF-hand calcium binding domain 2                        | NM_026626.2      |
| 18 | Gene Kif26b       | MGC169313, E kinesin family member 26B                               | NM_001161665.1   |
| 32 | Gene Tfb2m        | Hkp1, Tfb2m transcription factor B2, mitochondrial                   | NM_008249.4      |
| 32 | Gene Cnst         | Cnst, 9630058. consortin, connexin sorting protein                   | NM_146105.3      |
| 28 | Gene Sccpdh       | Sccpdh, C3300 saccharopine dehydrogenase (putative)                  | NM_178653.3      |
| 30 | Gene Ahctf1       | AV011447, Ah AT hook containing transcription factor 1               | NM_026375.2      |
| 28 | Gene Psen2        | PS-2, Alg3, ALC presenilin 2                                         | NM_001128605.1   |
| 26 | Gene Itpkb        | Itpkb, E130307 inositol 1,4,5-trisphosphate 3-kinase B               | NM_001081175.1   |
| 20 | Gene 6330403      | Gm10001, ENS RIKEN cDNA 6330403A02 gene                              | NM_001081227.2   |
| 28 | Gene Parp1        | PARP, parp-1, poly (ADP-ribose) polymerase family, member 1          | NM_007415.2      |
| 25 | Gene Lin9         | TGS, Lin9, AA5 lin-9 homolog (C. elegans)                            | NM_175186.4, NM  |
| 20 | Gene Mixl1        | Mixl1, Mm1, M Mix1 homeobox-like 1 (Xenopus laevis)                  | NM_013729.3      |
| 27 | Gene Acbd3        | GOLPH1, GCP acyl-Coenzyme A binding domain containing 3              | NM_133225.3      |
| 32 | Gene H3f3a        | H3f3b, H3.3A, H3 histone, family 3A                                  | NM_008210.4      |
| 32 | Gene LOC101055935 | uncharacterized LOC101055935                                         | XR_168385.1, XR_ |
| 21 | Gene Lefty2       | 6030463A22Ri left-right determination factor 2                       | NM_177099.3      |
| 21 | Gene Pycr2        | P5cr2, Pycr2, 1 pyrroline-5-carboxylate reductase family, member 2   | NM_133705.2      |



|    |              |                                                                     |                  |
|----|--------------|---------------------------------------------------------------------|------------------|
| 22 | Gene Lefty1  | lefty, Tgfb4, Al left right determination factor 1                  | NM_010094.3      |
| 22 | Gene Tmem63  | MGC11687, Tr transmembrane protein 63a                              | NM_144794.2      |
| 27 | Gene Wdr26   | AI447817, Gid WD repeat domain 26                                   | NM_145514.5      |
| 24 | Gene Lbr     | Lbr, ic, AI5058 lamin B receptor                                    | NM_133815.2      |
| 24 | Gene Gm5533  | Gm5533, EG4 predicted gene 5533                                     | XR_035218.2, XR_ |
| 28 | Gene Srp9    | Srp9, 9kDa signal recognition particle 9                            | NM_012058.3      |
| 25 | Gene Trp53bp | 53BP2, ASPP2, transformation related protein 53 binding protein 2   | NM_173378.2      |
| 20 | Gene Capn2   | Capn2, m-calp. calpain 2                                            | NM_009794.3      |
| 31 | Gene Brox    | Brox, 0610010 BRO1 domain and CAAX motif containing                 | NM_027861.2      |
| 31 | Gene Aida    | MGC101949, Maxin interactor, dorsalization associated               | NM_181732.4      |
| 27 | Gene Mia3    | KIAA0268, Tan melanoma inhibitory activity 3                        | NM_177389.3      |
| 30 | Gene lars2   | 2010002H18Ri isoleucine-tRNA synthetase 2, mitochondrial            | NM_198653.2      |
| 32 | Gene Bpnt1   | Bpnt1, BPntas bisphosphate 3'-nucleotidase 1                        | NM_011794.3      |
| 32 | Gene Eprs    | 2410081F06Ri glutamyl-prolyl-tRNA synthetase                        | NM_029735.1      |
| 23 | Gene Tgfb2   | Tgfb-2, Tgfb2, transforming growth factor, beta 2                   | NM_009367.3      |
| 30 | Gene Kctd3   | E330032J19Ri potassium channel tetramerisation domain containi      | NM_172650.2      |
| 20 | Gene Kcnk2   | A430027H14Ri potassium channel, subfamily K, member 2               | NM_010607.2, NM  |
| 20 | Gene A430027 | A430027H14R RIKEN cDNA A430027H14 gene                              | XR_168386.1, XR_ |
| 22 | Gene Cenpf   | 6530404A22Ri centromere protein F                                   | NM_001081363.2   |
| 20 | Gene Ptpn14  | PTP36, Ptpn14 protein tyrosine phosphatase, non-receptor type 14    | NM_008976.2      |
| 31 | Gene Smyd2   | 1110020E07Ri SET and MYND domain containing 2                       | NM_026796.1      |
| 20 | Gene Prox1   | A230003G05Ri prospero-related homeobox 1                            | NM_008937.2      |
| 21 | Gene Rps6kc1 | Rps6kc1, AA68 ribosomal protein S6 kinase polypeptide 1             | NM_178775.4      |
| 23 | Gene Vash2   | MGC38004, B1vasohibin 2                                             | NM_144879.2, NR  |
| 19 | Gene Batf3   | 9130211I03Ri basic leucine zipper transcription factor, ATF-like 3  | NM_030060.2      |
| 21 | Gene D730003 | D730003I15Ri RIKEN cDNA D730003I15 gene                             | XR_140481.2, XR_ |
| 20 | Gene Nenf    | SCIRP10, Nenf, neuron derived neurotrophic factor                   | NM_025424.2      |
| 20 | Gene Tmem206 | 2310028N02Ri transmembrane protein 206                              | NM_025864.3      |
| 28 | Gene Ppp2r5a | Ppp2r5a, MGC protein phosphatase 2, regulatory subunit B (B56), a   | NM_144880.4      |
| 28 | Gene Gm2020  | Gm20201 predicted gene, 20201                                       | XR_107310.1, XR_ |
| 36 | Gene Dtl     | 5730564G15Ri denticleless homolog (Drosophila)                      | NM_029766.2      |
| 36 | Gene Ints7   | 5930412E23Ri integrator complex subunit 7                           | NM_178632.5      |
| 22 | Gene Lpgat1  | MGC18768, Al lysophosphatidylglycerol acyltransferase 1             | NM_172266.3, NM  |
| 42 | Gene Nek2    | C77054, Nek2, NIMA (never in mitosis gene a)-related expressed ki   | NM_010892.3      |
| 48 | Gene 1700034 | 4930557M11R RIKEN cDNA 1700034H15 gene                              | NR_030669.1      |
| 48 | Gene Slc30a1 | AI839647, Znt solute carrier family 30 (zinc transporter), member 1 | NM_009579.3      |
| 28 | Gene Rcor3   | E130101E15Ri REST corepressor 3                                     | NM_144814.2      |
| 28 | Gene Gm1051  | ENSMUSG000 predicted gene 10516                                     | NR_033536.1      |
| 23 | Gene Hhat    | AP-2CRE, Hhat hedgehog acyltransferase                              | NM_144881.4      |
| 24 | Gene A730013 | A730013G03R RIKEN cDNA A730013G03 gene                              | XR_035313.2, XR_ |
| 24 | Gene 1700065 | 1700065J18Ri RIKEN cDNA 1700065J18 gene                             | NR_040468.1      |
| 27 | Gene Sertad4 | C130018M11R SERTA domain containing 4                               | NM_001177794.1,  |
| 27 | Gene Gm1586  | Gm15867, OT predicted gene 15867                                    | XM_003946057.1,  |
| 20 | Gene Plxna2  | 2810428A13Ri plexin A2                                              | NM_008882.2      |
| 26 | Gene Plekhg1 | Gm521, Plekh pleckstrin homology domain containing, family G (w     | NM_001033253.3   |
| 26 | Gene Mthfd1l | 2410004L15Ri methylenetetrahydrofolate dehydrogenase (NADP+         | NM_172308.4, NM  |
| 24 | Gene Akap12  | Tsga12, AI317 A kinase (PRKA) anchor protein (gravin) 12            | NM_031185.3      |

|    |                   |                                                                     |                  |
|----|-------------------|---------------------------------------------------------------------|------------------|
| 24 | Gene Zbtb2        | Gm1103, Zbtb: zinc finger and BTB domain containing 2               | NM_001033466.3   |
| 21 | Gene Rmnd1        | AW536662, A/ required for meiotic nuclear division 1 homolog (S. c  | NM_025343.5      |
| 21 | Gene 1700052      | AW536799, 17 RIKEN cDNA 1700052N19 gene                             | NM_024261.2      |
| 62 | Gene Fbxo5        | Fbxo5, 251004 F-box protein 5                                       | NM_025995.2      |
| 62 | Gene Mtrf1l       | Mtrf1l, 91300 mitochondrial translational release factor 1-like     | NM_175374.3      |
| 20 | Gene Rgs17        | 6430507P11Ri regulator of G-protein signaling 17                    | NM_019958.4, NM  |
| 26 | Gene Cnksr3       | 6820402C05, C/ Cnksr family member 3                                | NM_172546.2      |
| 32 | Gene Lrp11        | 9830160H19Ri low density lipoprotein receptor-related protein 11    | NM_172784.3      |
| 32 | Gene Pcmt1        | C79501, PIMT, protein-L-isoaspartate (D-aspartate) O-methyltransf   | NM_008786.2      |
| 32 | Gene A630066      | A630066F11Ri RIKEN cDNA A630066F11 gene                             | NR_030698.1      |
| 32 | Gene Nup43        | 2610529I12Ri nucleoporin 43                                         | NM_145706.2      |
| 23 | Gene BC02040      | BC020402 cDNA sequence BC020402                                     | NR_033219.1      |
| 23 | Gene Lats1        | AW208599, La large tumor suppressor                                 | NM_010690.1      |
| 20 | Gene 6530403      | 6530403G13Ri RIKEN cDNA 6530403G13 gene                             | XM_003945462.1,  |
| 20 | Gene Ppil4        | PPIase, 37324: peptidylprolyl isomerase (cyclophilin)-like 4        | NM_026141.3      |
| 30 | Gene Tab2         | A530078N03R TGF-beta activated kinase 1/MAP3K7 binding protei       | NM_138667.3      |
| 25 | Gene Ust          | UA20ST, Ust, Uronyl-2-sulfotransferase                              | NM_177387.3      |
| 28 | Gene Sash1        | 2500002E12Ri SAM and SH3 domain containing 1                        | NM_175155.4      |
| 28 | Gene LOC101056021 | uncharacterized LOC101056021                                        | XM_003945459.1,  |
| 19 | Gene Stxbp5       | Stxbp5, mKIAA syntaxin binding protein 5 (tomosyn)                  | NM_001081344.2   |
| 28 | Gene Fbxo30       | Fbxo30, 17000 F-box protein 30                                      | NM_027968.3, NM  |
| 26 | Gene Utrn         | Utrn, DRP, AA/ utrophin                                             | NM_011682.4      |
| 22 | Gene Plagl1       | Zac1, Plagl1, L/ pleiomorphic adenoma gene-like 1                   | NM_009538.2      |
| 34 | Gene Ltv1         | Ltv1, 2610020I LTV1 homolog (S. cerevisiae)                         | NM_181470.4      |
| 17 | Gene Phactr2      | AV158170, Ph/ phosphatase and actin regulator 2                     | NM_001195065.1,  |
| 26 | Gene Hivep2       | Shn-2, MIBP1, human immunodeficiency virus type I enhancer binc     | NM_010437.2      |
| 26 | Gene Gm2011       | Gm20114 predicted gene, 20114                                       | XR_106495.1, XR_ |
| 24 | Gene Vta1         | 1110059P08Ri Vps20-associated 1 homolog (S. cerevisiae)             | NM_025418.3      |
| 24 | Gene 1700016      | 1700016L04Ri RIKEN cDNA 1700016L04 gene                             | NR_045824.1      |
| 24 | Gene Gje1         | Gjf1, D230044 gap junction protein, epsilon 1                       | NM_029722.1      |
| 33 | Gene Cited2       | Cited2, p35srj, Cbp/p300-interacting transactivator, with Glu/Asp-r | NM_010828.3      |
| 25 | Gene Abracl       | 3110003A17Ri ABRA C-terminal like                                   | NM_028440.1      |
| 22 | Gene Reps1        | Reps1, BB1612 RalBP1 associated Eps domain containing protein       | NM_009048.2, NM  |
| 25 | Gene Map3k5       | ASK, MGC141/ mitogen-activated protein kinase kinase kinase 5       | NM_008580.4      |
| 20 | Gene Hbs1l        | Hbs1l, 281003. Hbs1-like (S. cerevisiae)                            | NM_019702.2, NM  |
| 25 | Gene Sgk1         | Sgk, Sgk1 serum/glucocorticoid regulated kinase 1                   | NM_001161845.2   |
| 28 | Gene Tbp1l        | Tlp, TLF, TRP, / TATA box binding protein-like 1                    | NM_011603.5      |
| 20 | Gene Gm1082       | ENSMUSG000 (predicted gene 10824                                    | XR_140973.1, XR_ |
| 20 | Gene Tcf21        | Pod-1, Pod1, T transcription factor 21                              | NM_011545.1      |
| 38 | Gene Rps12        | MGC117504, R/ ribosomal protein S12                                 | NM_011295.6      |
| 38 | Gene Snora33      | Snora33, ACA3 small nucleolar RNA, H/ACA box 33                     | NR_037680.1      |
| 38 | Gene Snord10      | Snord100, Z51 small nucleolar RNA, C/D box 100                      | NR_037681.1      |
| 38 | Gene Slc18b1      | Slc18b1, 1110 (solute carrier family 18, subfamily B, member 1      | NM_183116.2      |
| 22 | Gene Stx7         | Stx7, AI31506/ syntaxin 7                                           | NM_016797.4      |
| 29 | Gene Ctgf         | fisp-12, Fisp12 connective tissue growth factor                     | NM_010217.2      |
| 24 | Gene Epb4.112     | NBL2, AW5551 erythrocyte protein band 4.1-like 2                    | NM_013511.3, NM  |
| 18 | Gene L3mbtl3      | AI481284, MB/ l(3)mbt-like 3 (Drosophila)                           | NM_172787.2      |

|    |              |                                                                      |                  |
|----|--------------|----------------------------------------------------------------------|------------------|
| 21 | Gene Ptprk   | AI853699, Ptpi protein tyrosine phosphatase, receptor type, K        | NM_008983.2      |
| 18 | Gene Soga3   | Soga3, 633040 SOGA family member 3                                   | NM_026138.2      |
| 33 | Gene Cenpw   | Cug2, 2610036L11Rik, Cenpw                                           | NM_001109747.1   |
| 20 | Gene Trmt11  | 3110045I18Rik, Trmt11, AW213713, 2410075D05Rik                       | NM_028604.2      |
| 20 | Gene Gm2030  | Gm20300 predicted gene, 20300                                        | NR_045008.1      |
| 20 | Gene Hint3   | AV009015, Hir histidine triad nucleotide binding protein 3           | NM_025798.3      |
| 22 | Gene Hey2    | hesr2, Hey2, H hairy/enhancer-of-split related with YRPW motif 2     | NM_013904.1      |
| 18 | Gene Tpd52l1 | Tpd52l1, D53 tumor protein D52-like 1                                | NM_009413.1      |
| 25 | Gene Rwdd1   | 2610002D06Ri RWD domain containing 1                                 | NM_025614.3      |
| 27 | Gene Dse     | 6030499O08, † dermatan sulfate epimerase                             | NM_172508.2      |
| 32 | Gene Tspyl1  | Tspyl1, Tspyl testis-specific protein, Y-encoded-like 1              | NM_009433.3      |
| 21 | Gene Marcks  | Marcks, PKCSL myristoylated alanine rich protein kinase C substrate  | NM_008538.2      |
| 21 | Gene 5930403 | 5930403N24Ri RIKEN cDNA 5930403N24 gene                              | XR_106509.1, XR_ |
| 26 | Gene Fyn     | MGC115870, † Fyn proto-oncogene                                      | NM_008054.2, NM  |
| 35 | Gene E130307 | E130307A14Ri RIKEN cDNA E130307A14 gene                              | NR_038037.1      |
| 35 | Gene Rev3l   | Rev, Sez4, Rev. REV3-like, catalytic subunit of DNA polymerase zeta  | NM_011264.3      |
| 30 | Gene Amd1    | Amd1, 1, AdoMS-adenosylmethionine decarboxylase 1                    | NM_009665.5      |
| 33 | Gene Cdk19   | Cdc2l6, 27000: cyclin-dependent kinase 19                            | NM_001168304.1   |
| 26 | Gene Mettl24 | Mettl24, 9030: methyltransferase like 24                             | NM_177793.3      |
| 23 | Gene Cdc40   | EHB3, 120000: cell division cycle 40                                 | NM_027879.2      |
| 23 | Gene Wasf1   | Wasf1, AI1953 WAS protein family, member 1                           | NM_031877.3      |
| 25 | Gene Fig4    | A530089I17Ri FIG4 homolog (S. cerevisiae)                            | NM_133999.1      |
| 26 | Gene Mical1  | MGC38321, Ni microtubule associated monooxygenase, calponin a        | NM_138315.2, NM  |
| 26 | Gene Smpd2   | AW108287, Sn sphingomyelin phosphodiesterase 2, neutral              | NM_009213.2      |
| 31 | Gene Ppil6   | Ppil6, 2900084 peptidylprolyl isomerase (cyclophilin)-like 6         | NM_028430.1      |
| 31 | Gene Cd164   | AA589639, A1: CD164 antigen                                          | NM_016898.2      |
| 22 | Gene Sesn1   | Sesn1, 111000 sestrin 1                                              | NM_001162908.1   |
| 43 | Gene Foxo3   | 2010203A17Ri forkhead box O3                                         | NM_019740.2      |
| 24 | Gene Lace1   | Lace1, CG8520 lactation elevated 1                                   | NM_145743.2      |
| 22 | Gene Snx3    | MGC151262, S sorting nexin 3                                         | NM_017472.4      |
| 24 | Gene Ostm1   | 1200002H13Ri osteopetrosis associated transmembrane protein 1        | NM_172416.3      |
| 35 | Gene Sec63   | AW319215, 57 SEC63-like (S. cerevisiae)                              | NM_153055.3      |
| 19 | Gene Sobp    | MGC67344, 53 sine oculis-binding protein homolog (Drosophila)        | NM_175407.3      |
| 19 | Gene 9030612 | 9030612E09Ri RIKEN cDNA 9030612E09 gene                              | NM_172419.2      |
| 20 | Gene Bend3   | Bend3, mKIAA BEN domain containing 3                                 | NM_199028.2      |
| 19 | Gene Cd24a   | Cd24a, nectad CD24a antigen                                          | NM_009846.2      |
| 23 | Gene Qrsl1   | 2700038P16Ri glutaminyl-tRNA synthase (glutamine-hydrolyzing)-li     | NM_001081054.2   |
| 23 | Gene Rtn4ip1 | Rtn4ip1, NIMP reticulon 4 interacting protein 1                      | NM_130892.4      |
| 18 | Gene Prep    | AI047692, Prej prolyl endopeptidase                                  | NM_011156.2      |
| 21 | Gene Hace1   | KIAA1320, A73 HECT domain and ankyrin repeat containing, E3 ubiq     | NM_172473.3      |
| 19 | Gene Dcbld1  | Dcbld1, 46314 discoidin, CUB and LCCL domain containing 1            | NM_025705.3      |
| 22 | Gene Gopc    | PIST, 2210402I golgi associated PDZ and coiled-coil motif containing | NM_053187.3, NM  |
| 22 | Gene Nepn    | Npn, 5730521I nephrocan                                              | NM_025684.2      |
| 29 | Gene Nus1    | Nus1, 1600027 nuclear undecaprenyl pyrophosphate synthase 1 ho       | NM_030250.2      |
| 16 | Gene Cep85l  | Cep85l, Gm97I centrosomal protein 85-like                            | NM_001204983.1   |
| 26 | Gene Mcm9    | MGC70158, 9C minichromosome maintenance complex component            | NM_027830.2      |
| 26 | Gene Asf1a   | 2310079C17Ri ASF1 anti-silencing function 1 homolog A (S. cerevisi   | NM_025541.3      |

|    |               |                     |                                                        |                  |
|----|---------------|---------------------|--------------------------------------------------------|------------------|
| 26 | Gene Gm3902   | Gm3902              | predicted gene 3902                                    | XR_140984.1, XR_ |
| 29 | Gene Man1a    | Man1a1, PCR1        | mannosidase 1, alpha                                   | NM_008548.4      |
| 29 | Gene Gm1699   | Gm16998             | predicted gene, 16998                                  | NR_038016.1      |
| 38 | Gene D63003   | D630037F22Ri        | RIKEN cDNA D630037F22 gene                             | NM_001033385.3   |
| 38 | Gene Msl3l2   | Msl3l2, 17000i      | male-specific lethal 3-like 2 (Drosophila)             | NM_001163833.1   |
| 30 | Gene Serinc1  | Tde2, Tde1l, A      | serine incorporator 1                                  | NM_019760.3      |
| 41 | Gene Ranbp2   | Ranbp2, NUP3        | RAN binding protein 2                                  | NM_011240.3      |
| 28 | Gene Sept10   | AI874685, AA4       | septin 10                                              | NM_001024911.2,  |
| 28 | Gene Sowahc   | Ankrd57, 9430       | sosondowah ankyrin repeat domain family member         | NM_172939.3      |
| 29 | Gene P4ha1    | AL022634, P4f       | procollagen-proline, 2-oxoglutarate 4-dioxygenase (    | NM_011030.2      |
| 22 | Gene Mcu      | Gm64, 20100120      | 16Rik, D130073L02Rik, Ccdc109a, AV064928, C10          | NM_001033259.4   |
| 30 | Gene Dnajb12  | Dnajb12, Dj10, DnaJ | (Hsp40) homolog, subfamily B, member 12                | NM_019965.2      |
| 34 | Gene Ascc1    | AI550520, CGI-      | activating signal cointegrator 1 complex subunit 1     | NM_026937.3, NM  |
| 34 | Gene Spock2   | AA407235, Gc:       | sparc/osteonectin, cwcw and kazal-like domains prot    | NM_052994.2      |
| 22 | Gene Chst3    | Chst3, C6ST, G      | carbohydrate (chondroitin 6/keratan) sulfotransfera    | NM_016803.3      |
| 21 | Gene Psap     | AI037048, SGP       | prosaposin                                             | NM_011179.3, NM  |
| 27 | Gene Cdh23    | 4930542A03Ri        | cadherin 23 (otocadherin)                              | NM_001252635.1   |
| 21 | Gene Unc5b    | Unc5b, A6300:       | unc-5 homolog B (C. elegans)                           | NM_029770.2      |
| 22 | Gene Sgpl1    | Sgpl1, D10Xrf4      | sphingosine phosphate lyase 1                          | NM_009163.3      |
| 29 | Gene Adamts1  | TS14, Adamts-       | a disintegrin-like and metallopeptidase (reprolysin t  | NM_001081127.1   |
| 22 | Gene Pald1    | X99384, Pald, l     | phosphatase domain containing, paladin 1               | NM_013753.2      |
| 37 | Gene Eif4ebp2 | MGC141219, 2        | eukaryotic translation initiation factor 4E binding pr | NM_010124.2      |
| 31 | Gene Ppa1     | Pyp, 2010317E       | pyrophosphatase (inorganic) 1                          | NM_026438.4      |
| 37 | Gene Sar1a    | Sar1a, Sara, Sa     | SAR1 gene homolog A (S. cerevisiae)                    | NM_009120.2      |
| 37 | Gene Tysnd1   | Tysnd1, 13000       | trypsin domain containing 1                            | NM_027912.1      |
| 28 | Gene H2afy2   | macroH2A2, M        | H2A histone family, member Y2                          | NM_207000.2      |
| 28 | Gene Mir5108  | mmu-mir-510         | microRNA 5108                                          | NR_039568.1      |
| 20 | Gene Col13a1  | Col13a1             |                                                        | NM_007731.2      |
| 18 | Gene Tspan15  | 2700063A19Ri        | tetraspanin 15                                         | NM_197996.2      |
| 21 | Gene 2510003  | KBP, 0710007C       | RIKEN cDNA 2510003E04 gene                             | NM_028197.2      |
| 26 | Gene Ddx21    | AL022742, Dd        | DEAD (Asp-Glu-Ala-Asp) box polypeptide 21              | NM_019553.2      |
| 29 | Gene Ddx50    | GU2, 8430408        | DEAD (Asp-Glu-Ala-Asp) box polypeptide 50              | NM_053183.2      |
| 29 | Gene Stox1    | Gm63, 473247        | storkhead box 1                                        | NM_001033260.1   |
| 23 | Gene Slc25a1  | 3110021G18Ri        | solute carrier family 25 (mitochondrial carrier, Grav  | NM_175194.2      |
| 26 | Gene Dna2     | Dna2, KIAA00        | DNA replication helicase 2 homolog (yeast)             | NM_177372.3      |
| 26 | Gene Rufy2    | Denn, ZFYVE1        | RUN and FYVE domain-containing 2                       | NM_027425.3      |
| 26 | Gene Hnrnp3   | AA693301, Hn        | heterogeneous nuclear ribonucleoprotein H3             | NM_001079824.1   |
| 26 | Gene Pbld2    | Pbld2, 311004       | phenazine biosynthesis-like protein domain containi    | NM_026085.2      |
| 31 | Gene 170012C  | 1700120B22Ri        | RIKEN cDNA 1700120B22 gene                             | XM_001472938.2,  |
| 31 | Gene Herc4    | 1700056O17Ri        | hect domain and RLD 4                                  | NM_030114.2, NM  |
| 31 | Gene Gm1933   | Gm19337             | predicted gene, 19337                                  | XR_141007.1, XR_ |
| 26 | Gene Gm7075   | EG631906, Gr        | ring finger protein 7 pseudogene                       |                  |
| 26 | Gene Ctnna3   | Catna3, Vr22, l     | catenin (cadherin associated protein), alpha 3         | NM_177612.3, NM  |
| 34 | Gene Reep3    | Reep3, AW742        | receptor accessory protein 3                           | NM_178606.5, NM  |
| 21 | Gene Jmjd1c   | Jmjd1c, Jmjdic      | jumonji domain containing 1C                           | NM_207221.2, NM  |
| 21 | Gene Nrpf2    | NRBF-2, Nrpf2       | nuclear receptor binding factor 2                      | NM_001036293.2   |
| 38 | Gene Egr2     | Zfp-25, Krox-2l     | early growth response 2                                | NM_010118.3      |

|    |              |                                                                        |                  |
|----|--------------|------------------------------------------------------------------------|------------------|
| 38 | Gene Ado     | MGC67243, Gr 2-aminoethanethiol (cysteamine) dioxygenase               | NM_001005419.2   |
| 21 | Gene Zfp365  | talainin, Zfp365 zinc finger protein 365                               | NM_178679.2      |
| 24 | Gene Rtkn2   | Plekhk1, MGC: rhotekin 2                                               | NM_001081346.1   |
| 26 | Gene Rhobtb1 | AV350930, Rho Rho-related BTB domain containing 1                      | NM_001081347.1   |
| 26 | Gene A930033 | A930033H14R RIKEN cDNA A930033H14 gene                                 | XR_105403.3, XR_ |
| 39 | Gene Cdk1    | Cdk1, Cdc2, Cd cyclin-dependent kinase 1                               | NM_007659.3      |
| 20 | Gene 4833431 | 4833431D13Ri RIKEN cDNA 4833431D13 gene                                | XR_168681.1, XR_ |
| 44 | Gene Ccdc6   | AA536681, AA coiled-coil domain containing 6                           | NM_001111121.1   |
| 19 | Gene Bicc1   | Bicc1, jcpk, Bic bicaudal C homolog 1 (Drosophila)                     | NM_031397.2      |
| 19 | Gene C730027 | C730027H18Ri RIKEN cDNA C730027H18 gene                                | NR_038040.1      |
| 31 | Gene Tfam    | tsHMG, A1661: transcription factor A, mitochondrial                    | NM_009360.4      |
| 24 | Gene Ube2d1  | Ube2d1, MGC28550, UBCH5                                                | NM_145420.2      |
| 24 | Gene Cisd1   | AW743335, Zc CDGSH iron sulfur domain 1                                | NM_134007.4      |
| 24 | Gene Ipmk    | AA408208, Ipn inositol polyphosphate multikinase                       | NM_027184.1      |
| 30 | Gene Rab36   | 6330593L16Ri RAB36, member RAS oncogene family                         | NM_029781.3      |
| 30 | Gene Bcr     | mKIAA3017, A breakpoint cluster region                                 | NM_001081412.2   |
| 16 | Gene Adora2a | A2AAR, A2aR, adenosine A2a receptor                                    | NM_009630.2      |
| 27 | Gene Gucd1   | 1110038D17Ri guanylyl cyclase domain containing 1                      | NM_175133.1      |
| 27 | Gene Snrpd3  | AW046420, 23 small nuclear ribonucleoprotein D3                        | NM_026095.4      |
| 26 | Gene Der13   | IZP6, MGC118: Der1-like domain family, member 3                        | NM_024440.2      |
| 26 | Gene Smarcb1 | MGC132387, SSWI/SNF related, matrix associated, actin dependent        | NM_011418.2, NM  |
| 33 | Gene Mmp11   | Stmy3, ST3, M matrix metalloproteinase 11                              | NM_008606.2      |
| 33 | Gene Chchd10 | 1620401E04Ri coiled-coil-helix-coiled-coil-helix domain containing     | NM_175329.3      |
| 33 | Gene Gm867   | Gm867, Gm73 predicted gene 867                                         | XR_106529.1, XR_ |
| 22 | Gene Dip2a   | Dip2, A142632: DIP2 disco-interacting protein 2 homolog A (Drosophila) | NM_001081419.2   |
| 22 | Gene Pcmt    | AW476095, KE pericentrin (kendrin)                                     | NM_008787.3      |
| 25 | Gene Pcbp3   | Pcbp3, AlphaC poly(rC) binding protein 3                               | NM_021568.2      |
| 18 | Gene Col18a1 | Col18a1, endo collagen, type XVIII, alpha 1                            | NM_009929.3, NM  |
| 22 | Gene Fam207  | 1810008A18Ri family with sequence similarity 207, member A             | NM_133998.3      |
| 26 | Gene Pttg1ip | AU018448, 18: pituitary tumor-transforming 1 interacting protein       | NM_145925.2      |
| 33 | Gene Sumo3   | AW121497, 28 SMT3 suppressor of mif two 3 homolog 3 (yeast)            | NM_019929.3      |
| 33 | Gene Ube2g2  | UBC7, D10Xrf3 ubiquitin-conjugating enzyme E2G 2                       | NM_019803.3      |
| 22 | Gene Trpm2   | Trpp7, Trp7, C7 transient receptor potential cation channel, subfamily | NM_138301.2      |
| 22 | Gene 1810043 | AV026620, D1: RIKEN cDNA 1810043G02 gene                               | NM_026431.2      |
| 28 | Gene Pfkfb3  | Pfkfb3, AA40786: phosphofructokinase, liver, B-type                    | NM_008826.4      |
| 22 | Gene Dnmt3l  | MGC102308, DNMT3L DNA (cytosine-5-)-methyltransferase 3-like           | NM_001081695.1   |
| 22 | Gene Icosl   | Ly115l, B7-H2, icos ligand                                             | NM_015790.3      |
| 20 | Gene Pwp2    | wdp103, MGC PWP2 periodic tryptophan protein homolog (yeast)           | NM_029546.2, XM  |
| 29 | Gene Trappc1 | Tmem1, Trapp trafficking protein particle complex 10                   | NM_001081055.1   |
| 20 | Gene Cstb    | AA960480, Cst cystatin B                                               | NM_007793.3      |
| 21 | Gene Pdxk    | AA119688, 23: pyridoxal (pyridoxine, vitamin B6) kinase                | NM_172134.2      |
| 25 | Gene Mier2   | 2700087H15Ri mesoderm induction early response 1, family member        | NM_027422.2      |
| 20 | Gene Shc2    | 6720466E06, SSHC (Src homology 2 domain containing) transforming       | NM_001024539.1   |
| 20 | Gene Odf3l2  | Odf3l2, Gm11: outer dense fiber of sperm tails 3-like 2                | NM_001033473.2   |
| 33 | Gene Madcam1 | MGC144711, MadCAM1 mucosal vascular addressin cell adhesion molecule 1 | NM_013591.2      |
| 33 | Gene Tpgs1   | PGs1, AV005629, Gm16517, Gtrgeo22, Tpgs1                               | NM_148934.2      |
| 28 | Gene Cdc34   | Cdc34, A13272 cell division cycle 34                                   | NM_177613.2      |

|    |              |                                                                      |                  |
|----|--------------|----------------------------------------------------------------------|------------------|
| 24 | Gene Hcn2    | trls, Hcn2, BCN hyperpolarization-activated, cyclic nucleotide-gated | NM_008226.2      |
| 24 | Gene Polrmt  | 1110018N15Ri polymerase (RNA) mitochondrial (DNA directed)           | NM_172551.3      |
| 20 | Gene Fgf22   | 2210414E06Ri fibroblast growth factor 22                             | NM_023304.1      |
| 20 | Gene Rnf126  | 2610010O19Ri ring finger protein 126                                 | NM_144528.3, NR  |
| 20 | Gene Fstl3   | Fstl3, Flrg, E03 follistatin-like 3                                  | NM_031380.2      |
| 18 | Gene Prss57  | UNQ782, GLGI protease, serine 57                                     | NM_001042710.1   |
| 18 | Gene Palm    | Palm paralemmin                                                      | NM_023128.4, NM  |
| 28 | Gene E130317 | E130317F20Ri RIKEN cDNA E130317F20 gene                              | NR_029447.1      |
| 28 | Gene Ptbp1   | Ptbp1, PTB4, p polypyrimidine tract binding protein 1                | NM_001077363.1   |
| 28 | Gene BC00576 | Lppr3, Prg2, KI cDNA sequence BC005764                               | NM_181681.2, NR  |
| 21 | Gene Prtn3   | mPR3, Prtn3, F proteinase 3                                          | NM_011178.2      |
| 17 | Gene Elane   | F430011M15R elastase, neutrophil expressed                           | NM_015779.2      |
| 17 | Gene Cfd     | DF, Cfd, Adn complement factor D (adipsin)                           | NM_013459.2      |
| 19 | Gene Med16   | 95kDa, A63008 mediator complex subunit 16                            | NM_198107.2, NM  |
| 29 | Gene R3hdm4  | R3hdm4, AI50: R3H domain containing 4                                | NM_177994.4      |
| 29 | Gene Kiss1r  | Kiss1r, KiSS-1, KISS1 receptor                                       | NM_053244.5      |
| 29 | Gene Arid3a  | Dri1, Bright, ArAT rich interactive domain 3A (BRIGHT-like)          | NM_007880.3      |
| 23 | Gene Wdr18   | AW122032, W WD repeat domain 18                                      | NM_175450.4      |
| 23 | Gene Grin3b  | Grin3b, NR3B, glutamate receptor, ionotropic, NMDA3B                 | NM_130455.2      |
| 24 | Gene Tmem25  | Tmem259, R32 transmembrane protein 259                               | NM_001003949.3   |
| 24 | Gene Cnn2    | Cnn2, AI32467 calponin 2                                             | NM_007725.2      |
| 24 | Gene Abca7   | Abca7, Abc51, ATP-binding cassette, sub-family A (ABC1), member      | NM_013850.1      |
| 25 | Gene Gpx4    | mtPHGPx, PHG glutathione peroxidase 4                                | NM_001037741.2,  |
| 32 | Gene Sbno2   | Sno, Sbno2, St strawberry notch homolog 2 (Drosophila)               | NM_183426.1      |
| 41 | Gene Stk11   | Lkb1, Stk11, P2 serine/threonine kinase 11                           | NM_011492.3      |
| 48 | Gene Dos     | R29144/1, Dos downstream of Stk11                                    | NM_001195268.1   |
| 48 | Gene Atp5d   | AI876556, C85 ATP synthase, H+ transporting, mitochondrial F1 cor    | NM_025313.2      |
| 48 | Gene Midn    | Midn, 300000: midnolin                                               | NM_021565.1      |
| 40 | Gene Cirbp   | Cirbp, R74941, cold inducible RNA binding protein                    | NM_007705.2      |
| 40 | Gene 1600002 | 1600002K03Rik                                                        | NM_027207.2      |
| 31 | Gene Efna2   | Efna2, CEK7L, Iephrin A2                                             | NM_007909.3      |
| 18 | Gene Mum1    | UBE-1C2, 943C melanoma associated antigen (mutated) 1                | NM_023431.5      |
| 33 | Gene Ndufs7  | 1010001M04R NADH dehydrogenase (ubiquinone) Fe-S protein 7           | NM_029272.3      |
| 33 | Gene Gamt    | AA571402, Spi guanidinoacetate methyltransferase                     | NM_010255.3      |
| 55 | Gene Dazap1  | 2410042M16R DAZ associated protein 1                                 | NM_133188.2, NM  |
| 55 | Gene Gm1512  | Gm15122, AI41 predicted gene 15122                                   | XR_141027.1, XR_ |
| 55 | Gene Rps15   | rig, Rps15 ribosomal protein S15                                     | NM_009091.2      |
| 55 | Gene Apc2    | Apc2, APCL, AI adenomatosis polyposis coli 2                         | NM_011789.2      |
| 24 | Gene 2310011 | AI452186, 231 RIKEN cDNA 2310011J03 gene                             | NM_025521.3      |
| 24 | Gene Pcsk4   | Pcsk4, 071000: proprotein convertase subtilisin/kexin type 4         | NM_008793.2      |
| 24 | Gene Reep6   | 0610011M24R receptor accessory protein 6                             | NM_001204931.1   |
| 23 | Gene Adamts1 | 2010109H09Ri ADAMTS-like 5                                           | NM_025629.2, NM  |
| 19 | Gene Plk5    | Plk5, MGC106082, 6330514A18Rik                                       | NM_183152.3      |
| 47 | Gene Mex3d   | Rkhd1, BC0598 mex3 homolog D (C. elegans)                            | NM_198615.2      |
| 47 | Gene Mbd3    | Mbd3, AU0192 methyl-CpG binding domain protein 3                     | NM_013595.2      |
| 25 | Gene Tcf3    | E12/E47, E2A, transcription factor 3                                 | NM_001164147.1   |
| 24 | Gene Atp8b3  | SAPLT, 170004 ATPase, class I, type 8B, member 3                     | NM_026094.3      |

|    |              |                 |                                                              |                 |
|----|--------------|-----------------|--------------------------------------------------------------|-----------------|
| 25 | Gene Rexo1   | EloA-BP1, 261(R | EX1, RNA exonuclease 1 homolog ( <i>S. cerevisiae</i> )      | NM_025852.3     |
| 36 | Gene Klf16   | DRRF, Klf16, B' | Kruppel-like factor 16                                       | NM_078477.2     |
| 36 | Gene Abhd17a | Abhd17a, MG     | (abhydrolase domain containing 17A                           | NM_145421.2     |
| 33 | Gene Adat3   | MGC65589, A'    | adenosine deaminase, tRNA-specific 3                         | NM_001100606.1  |
| 33 | Gene Scamp4  | Scamp4, AW7'    | secretory carrier membrane protein 4                         | NM_019575.4     |
| 18 | Gene Csnk1g2 | Csnk1g2, 2810   | casein kinase 1, gamma 2                                     | NM_001159591.1  |
| 18 | Gene Btd2    | 4930512K17Ri    | BTB (POZ) domain containing 2                                | NM_145361.2     |
| 27 | Gene Ap3d1   | AA407035, mE    | adaptor-related protein complex 3, delta 1 subunit           | NM_007460.1     |
| 28 | Gene Dot1l   | KMT4, mDot1,    | DOT1-like, histone H3 methyltransferase ( <i>S. cerevisi</i> | NM_199322.1     |
| 39 | Gene Plekhj1 | 9530063M10R     | pleckstrin homology domain containing, family J me           | NM_023900.2     |
| 39 | Gene Sf3a2   | SFA66, AW047    | splicing factor 3a, subunit 2                                | NM_013651.4     |
| 39 | Gene Amh     | MIS, Amh        | anti-Mullerian hormone                                       | NM_007445.2     |
| 39 | Gene Jsrp1   | JP-45, 231003   | junctional sarcoplasmic reticulum protein 1                  | NM_028001.3     |
| 22 | Gene Oaz1    | AZ1, ODC-Az,    | ornithine decarboxylase antizyme 1                           | NM_008753.4     |
| 22 | Gene Mir1982 | mmu-mir-198     | microRNA 1982                                                | NR_035503.1     |
| 22 | Gene Lingo3  | LERN2, Lingo3,  | leucine rich repeat and Ig domain containing 3               | NM_001013758.2  |
| 31 | Gene Lsm7    | 0910001B06Ri    | LSM7 homolog, U6 small nuclear RNA associated ( <i>S.</i>    | NM_025349.2     |
| 31 | Gene Sppl2b  | AW550292, Sp    | signal peptide peptidase like 2B                             | NM_175195.3     |
| 23 | Gene Tmprss9 | Serase-1B, Tm   | transmembrane protease, serine 9                             | NM_001081688.2  |
| 23 | Gene Timm13  | Tim9, Timm9,    | translocase of inner mitochondrial membrane 13               | NM_013895.4     |
| 23 | Gene Lmnb2   | Lmnb2           | lamin B2                                                     | NM_010722.5     |
| 33 | Gene Gadd45b | Gadd45b, A132   | growth arrest and DNA-damage-inducible 45 beta               | NM_008655.1     |
| 24 | Gene Slc39a3 | MGC109671, I    | solute carrier family 39 (zinc transporter), member 3        | NM_134135.1     |
| 24 | Gene Sgta    | Sgta, Stg, Sgt, | I small glutamine-rich tetratricopeptide repeat (TPR)-       | NM_024499.1     |
| 38 | Gene Creb3l3 | Creb3l3, CREB-  | cAMP responsive element binding protein 3-like 3             | NM_145365.3     |
| 38 | Gene Map2k2  | Prkmk2, Map2    | mitogen-activated protein kinase kinase 2                    | NM_023138.4     |
| 27 | Gene Zbtb7a  | FBI-1, Pokemo   | zinc finger and BTB domain containing 7a                     | NM_010731.3     |
| 27 | Gene Pias4   | Pias-gamma, P   | protein inhibitor of activated STAT 4                        | NM_021501.4     |
| 26 | Gene Eef2    | MGC98463, Ee    | eukaryotic translation elongation factor 2                   | NM_007907.2     |
| 26 | Gene Dapk3   | Dapk3, ZIPK     |                                                              | NM_001190473.1  |
| 26 | Gene 2310050 | 2310050B05Ri    | RIKEN cDNA 2310050B05 gene                                   | NR_015477.1     |
| 26 | Gene Nmrk2   | Nmrk2, 2310015  | C21Rik, Itgb1bp3, Mibp                                       | NM_027120.2     |
| 33 | Gene Tjp3    | Tjp3, ZO-3      | tight junction protein 3                                     | NM_013769.2     |
| 33 | Gene Pip5k1c | Pip5kIgamma,    | phosphatidylinositol-4-phosphate 5-kinase, type 1 g          | NM_008844.2, NM |
| 24 | Gene Cactin  | 2510012J08Ri    | cactin, spliceosome C complex subunit                        | NM_027381.2     |
| 24 | Gene Tbx2r   | MGC107665, T    | thromboxane A2 receptor                                      | NM_009325.3     |
| 24 | Gene Gipc3   | Gipc3, Rgs19ip  | GIPC PDZ domain containing family, member 3                  | NM_148951.1     |
| 27 | Gene Hmg20b  | Hmgx2, AW61     | high mobility group 20B                                      | NM_010440.3, NM |
| 27 | Gene Mfsd12  | MGC148235, F    | major facilitator superfamily domain containing 12           | NM_028657.3     |
| 27 | Gene 4930404 | 2210409H10Ri    | RIKEN cDNA 4930404N11 gene                                   | NM_001014836.3  |
| 27 | Gene Fzr1    | FZR2, HCDH, F.  | fizzy/cell division cycle 20 related 1 ( <i>Drosophila</i> ) | NM_019757.1     |
| 20 | Gene Dohh    | 1110033C18Ri    | deoxyhypusine hydroxylase/monooxygenase                      | NM_133964.2     |
| 20 | Gene 2210404 | 2210404O07Rik   |                                                              | NM_001099917.1  |
| 22 | Gene Nfic    | NF1-C, 111001   | nuclear factor I/C                                           | NM_008688.3, NM |
| 20 | Gene Celf5   | Celf5, 493056   | CUGBP, Elav-like family member 5                             | NM_176954.3     |
| 32 | Gene Gna11   | Gna11, Dsk7,    | Eguanine nucleotide binding protein, alpha 11                | NM_010301.3     |
| 17 | Gene Aes     | Aes, AL024115   | amino-terminal enhancer of split                             | NM_010347.3     |

|    |              |                                                                     |                 |
|----|--------------|---------------------------------------------------------------------|-----------------|
| 17 | Gene Tle2    | Grg2, KIAA418 transducin-like enhancer of split 2, homolog of Dros  | NM_001252401.1  |
| 28 | Gene Ankrd24 | 5730519E19Ri ankyrin repeat domain 24                               | NM_027480.3     |
| 28 | Gene Gm1077  | ENSMUSG000(predicted gene 10778                                     | NM_001142963.1  |
| 21 | Gene AU0411  | AU041133 expressed sequence AU041133                                | NM_001163064.1  |
| 36 | Gene Glt8d2  | Glt8d2, 11100:glycosyltransferase 8 domain containing 2             | NM_029102.3     |
| 36 | Gene Hcfc2   | 1700129L13Ril host cell factor C2                                   | NM_001081218.1  |
| 27 | Gene Chst11  | C4ST1, Chst11, carbohydrate sulfotransferase 11                     | NM_021439.2     |
| 28 | Gene D10Wsu  | D10Wsu102e, DNA segment, Chr 10, Wayne State University 102, e      | NM_026579.3     |
| 33 | Gene Aldh1l2 | MGC19039, D:aldehyde dehydrogenase 1 family, member L2              | NM_153543.2     |
| 33 | Gene A23004  | A230046K03Ri RIKEN cDNA A230046K03 gene                             | NM_001033375.2  |
| 30 | Gene Nuak1   | Omphk1, AU0:NUAK family, SNF1-like kinase, 1                        | NM_001004363.1  |
| 28 | Gene Ckap4   | 5630400A09Ri cytoskeleton-associated protein 4                      | NM_175451.1     |
| 39 | Gene Tcpl1l2 | E430026E19Ri t-complex 11 (mouse) like 2                            | NM_146008.2     |
| 33 | Gene Fhl4    | Fhl4 four and a half LIM domains 4                                  | NM_010214.4     |
| 33 | Gene AI59746 | AI597468 expressed sequence AI597468                                | NM_001013028.2  |
| 39 | Gene Cry1    | AU021000, AU cryptochrome 1 (photolyase-like)                       | NM_007771.3     |
| 25 | Gene Btbd11  | 6330404E16Ri BTB (POZ) domain containing 11                         | NM_001017525.1  |
| 33 | Gene Pwp1    | AW550690, 26 PWP1 homolog (S. cerevisiae)                           | NM_133993.3     |
| 26 | Gene Prdm4   | 1700031E19Ri PR domain containing 4                                 | NM_181650.2     |
| 25 | Gene Ascl4   | Ascl4, bHLHa4.achaete-scute complex homolog 4 (Drosophila)          | NM_001163614.1  |
| 28 | Gene D10Wsu  | HSPC117, AI25 DNA segment, Chr 10, Wayne State University 52, e     | NM_145422.4     |
| 40 | Gene Bpifc   | Bpifc, 4732454BPI fold containing family C                          | NM_177772.4     |
| 40 | Gene Fbxo7   | Fbxo7, A23005 F-box protein 7                                       | NM_153195.2     |
| 27 | Gene Syn3    | Syn3, MGC130 synapsin III                                           | NM_001164495.1  |
| 27 | Gene Timp3   | Timp3, Timp-3 tissue inhibitor of metalloproteinase 3               | NM_011595.2     |
| 26 | Gene BC0303  | AI449705, Gnr cDNA sequence BC030307                                | NM_153595.3, NM |
| 26 | Gene Nt5dc3  | AW540062, C6 5'-nucleotidase domain containing 3                    | NM_175331.3     |
| 29 | Gene Parpbp  | Parpbp, AI503 PARP1 binding protein                                 | NM_029249.2     |
| 29 | Gene Nup37   | 2410003L22Ril nucleoporin 37                                        | NM_027191.2, NM |
| 22 | Gene Gnptab  | KIAA1208, mKIN-acetylglucosamine-1-phosphate transferase, alph      | NM_001004164.2  |
| 43 | Gene Utp20   | AA617408, mC UTP20, small subunit (SSU) processome component        | NM_175158.3     |
| 26 | Gene Uhrf1bp | KIAA0701, 201 UHRF1 (ICBP90) binding protein 1-like                 | NM_029166.2     |
| 22 | Gene Apaf1   | Apaf1, Apaf1l, apoptotic peptidase activating factor 1              | NM_001042558.1, |
| 22 | Gene Ikbip   | 1700023M03R IKBKB interacting protein                               | NM_027078.2, NM |
| 37 | Gene Slc25a3 | 5730556H19Ri solute carrier family 25 (mitochondrial carrier, phos) | NM_133668.3     |
| 40 | Gene Tmpo    | AW214352, AI thymopoietin                                           | NM_011605.2, NM |
| 22 | Gene Cdk17   | Cdk17, 643059 cyclin-dependent kinase 17                            | NM_146239.2     |
| 22 | Gene Mir1931 | Mir1931, mmu microRNA 1931                                          | NR_035452.1     |
| 17 | Gene Ntn4    | Ntn4                                                                | NM_021320.3     |
| 16 | Gene Usp44   | Usp44, E43000 ubiquitin specific peptidase 44                       | NM_183199.3, NM |
| 24 | Gene Vezt    | vezatin, AI854. vezatin, adherens junctions transmembrane protein   | NM_172538.4     |
| 24 | Gene Fgd6    | AA123052, Fgc FYVE, RhoGEF and PH domain containing 6               | NM_053072.3     |
| 24 | Gene Nr2c1   | 4831444H07Ri nuclear receptor subfamily 2, group C, member 1        | NM_011629.3     |
| 33 | Gene Tmcc3   | C88213, MGC3 transmembrane and coiled coil domains 3                | NM_172051.3, NM |
| 30 | Gene 4932415 | 4932415G12Ri RIKEN cDNA 4932415G12 gene                             | NR_015524.1     |
| 30 | Gene Ccdc41  | Ccdc41, 26000 coiled-coil domain containing 41                      | NM_029852.2     |
| 53 | Gene Plxnc1  | CD232, 25100. plexin C1                                             | NM_018797.2     |



|    |                |              |                                                                |                  |
|----|----------------|--------------|----------------------------------------------------------------|------------------|
| 20 | Gene Cradd     | RAIDD, Cradd | CASP2 and RIPK1 domain containing adaptor with d               | NM_009950.2      |
| 35 | Gene Socs2     | 8030460M17,  | suppressor of cytokine signaling 2                             | NM_007706.4, NM  |
| 35 | Gene 573042C   | 5730420D15Ri | RIKEN cDNA 5730420D15 gene                                     | NR_045338.1, NR_ |
| 29 | Gene Ube2n     | 1500026J17Ri | ubiquitin-conjugating enzyme E2N                               | NM_080560.3      |
| 24 | Gene Nudt4     | HDCMB47P,    | N nudix (nucleoside diphosphate linked moiety X)-type          | NM_027722.4      |
| 24 | Gene Mir3058   | mmu-mir-3058 | microRNA 3058                                                  | NR_037212.1      |
| 21 | Gene Eea1      | B230358H09Ri | early endosome antigen 1                                       | NM_001001932.3   |
| 29 | Gene Btg1      | AI426953,    | AW B cell translocation gene 1, anti-proliferative             | NM_007569.2      |
| 31 | Gene Atp2b1    | E130111D10Ri | ATPase, Ca <sup>++</sup> transporting, plasma membrane 1       | NM_026482.2      |
| 25 | Gene Poc1b     | Poc1b,       | Wdr51 POC1 centriolar protein homolog B (Chlamydomona          | NM_027740.6      |
| 25 | Gene Galnt4    | AV011803,    | Gal UDP-N-acetyl-alpha-D-galactosamine:polypeptide N           | NM_015737.4      |
| 32 | Gene Dusp6     | Dusp6,       | MKP3, dual specificity phosphatase 6                           | NM_026268.3      |
| 24 | Gene Tmtc2     | MGC116613,   | T transmembrane and tetratricopeptide repeat containi          | NM_177368.4      |
| 24 | Gene Gm1566    | OTTMUSG000i  | predicted gene 15663                                           | NR_038032.1      |
| 31 | Gene Ppp1r12   | AA792106,    | AV protein phosphatase 1, regulatory (inhibitor) subuni        | NM_027892.2      |
| 26 | Gene Pawr      | Pawr,        | Par-4, 2: PRKC, apoptosis, WT1, regulator                      | NM_054056.2      |
| 29 | Gene E2f7      | E2f7,        | A630014 E2F transcription factor 7                             | NM_178609.4      |
| 26 | Gene Zdhhc17   | Zdhhc17,     | A23C zinc finger, DHHC domain containing 17                    | NM_172554.2      |
| 32 | Gene Osbpl8    | AA536976,    | OR oxysterol binding protein-like 8                            | NM_175489.3, NM  |
| 28 | Gene Nap1l1    | AI256722,    | Nap nucleosome assembly protein 1-like 1                       | NM_015781.4, NM  |
| 28 | Gene Gm5176    | Gm5176,      | MGC high mobility group box 2 pseudogene                       | NR_033603.1      |
| 28 | Gene Phlda1    | TDAG51,      | Phlda1 pleckstrin homology-like domain, family A, member       | NM_009344.3      |
| 20 | Gene Krr1      | AI255219,    | 261 KRR1, small subunit (SSU) processome component, I          | NM_178610.4      |
| 37 | Gene Atxn7i3l  | AI315132,    | 492 ataxin 7-like 3B                                           | NM_001033474.2   |
| 37 | Gene LOC544737 |              | uncharacterized LOC544737                                      | XR_168684.1, XR_ |
| 28 | Gene Tbc1d15   | AU023730,    | Ral TBC1 domain family, member 15                              | NM_025706.3      |
| 22 | Gene Rab21     | Rab21,       | 963002 RAB21, member RAS oncogene family                       | NM_024454.1      |
| 22 | Gene Gm1075    | Gm10752,     | ENS predicted gene 10752                                       | XR_140995.1, XR_ |
| 29 | Gene Thap2     | AI649097,    | 903 THAP domain containing, apoptosis associated prote         | NM_025780.3      |
| 29 | Gene Zfc3h1    | Psrc2,       | BC03351 zinc finger, C3H1-type containing                      | NM_001033261.2   |
| 18 | Gene Lgr5      | Lgr5,        | FEX, Gpr1 leucine rich repeat containing G protein coupled rec | NM_010195.2      |
| 18 | Gene A930009   | A930009A15Ri | RIKEN cDNA A930009A15 gene                                     | NM_029982.1      |
| 16 | Gene Ptprb     | Ptpz,        | Ptprb, 32 protein tyrosine phosphatase, receptor type, B       | NM_029928.2      |
| 20 | Gene Kcnmb4    | MGC143660,   | k potassium large conductance calcium-activated char           | NM_021452.1      |
| 20 | Gene 493340C   | 4933400F03Ri | RIKEN cDNA 4933400F03 gene                                     | XR_105383.2, XR_ |
| 39 | Gene Cnot2     | AA537049,    | AA CCR4-NOT transcription complex, subunit 2                   | NM_001037847.2,  |
| 39 | Gene 5330438   | 5330438D12Ri | RIKEN cDNA 5330438D12 gene                                     | XR_168475.1, XR_ |
| 32 | Gene Cct2      | Cct2,        | Cctb chaperonin containing Tcp1, subunit 2 (beta)              | NM_007636.2      |
| 32 | Gene Frs2      | 4732458E18,  | C fibroblast growth factor receptor substrate 2                | NM_177798.3      |
| 37 | Gene Mdm2      | Mdm-2,       | Mdm2 transformed mouse 3T3 cell double minute 2                | NM_010786.3      |
| 21 | Gene Rap1b     | 2810443E11Ri | RAS related protein 1b                                         | NM_024457.2      |
| 38 | Gene Dyrk2     | Dyrk2,       | 181003 dual-specificity tyrosine-(Y)-phosphorylation regulat   | NM_001014390.2   |
| 39 | Gene Cand1     | AI846556,    | AI11 cullin associated and neddylation disassociated 1         | NM_027994.1      |
| 22 | Gene Irak3     | 4833428C18Ri | interleukin-1 receptor-associated kinase 3                     | NM_028679.3      |
| 35 | Gene Tmbim4    | AU022431,    | Tm transmembrane BAX inhibitor motif containing 4              | NM_026617.3      |
| 35 | Gene Llph      | MGC117871,   | 1LLP homolog, long-term synaptic facilitation (Aplysia         | NM_025431.2      |
| 23 | Gene Hmga2     | Hmga2,       | MGC1 high mobility group AT-hook 2                             | NM_010441.2      |

|    |                   |                                                                      |                  |
|----|-------------------|----------------------------------------------------------------------|------------------|
| 28 | Gene Lemd3        | Man1, AI3168f LEM domain containing 3                                | NM_001081193.2   |
| 29 | Gene Gns          | Gns, N28088, (glucosamine (N-acetyl)-6-sulfatase                     | NM_029364.3      |
| 28 | Gene Rassf3       | Rassf3, AW212 Ras association (RalGDS/AF-6) domain family memb       | NM_138956.3      |
| 40 | Gene Xpot         | 3110065H13Ri exportin, tRNA (nuclear export receptor for tRNAs)      | NM_001081056.1   |
| 30 | Gene BC048403     | E030027L10, B cDNA sequence BC048403                                 | NM_173022.2      |
| 24 | Gene Tmem5        | Tmem5, MGC1transmembrane protein 5                                   | NM_153059.1      |
| 21 | Gene Mirlet7i     | Mirlet7i, Mir1 microRNA let7i                                        | NR_029527.1      |
| 21 | Gene Mon2         | Mon2, mKIAA1MON2 homolog (yeast)                                     | NM_153395.2, NM  |
| 26 | Gene Usp15        | E430033I05Ri ubiquitin specific peptidase 15                         | NM_027604.3      |
| 26 | Gene Gm4129       | Gm4129 predicted gene 4129                                           | XR_105393.2, XR_ |
| 17 | Gene Fam19a       | 6330575M02, family with sequence similarity 19, member A2            | NM_182807.3, NR  |
| 26 | Gene Lrig3        | 9030421L11Ri leucine-rich repeats and immunoglobulin-like domain     | NM_177152.5      |
| 33 | Gene Ctdsp2       | OS4, D10ErtD7 CTD (carboxy-terminal domain, RNA polymerase II, p     | NM_146012.2, NM  |
| 29 | Gene Avil         | Avil, DOC6, Ad advillin                                              | NM_009635.3      |
| 29 | Gene Tsfm         | EF-TS, 943002 Ts translation elongation factor, mitochondrial        | NM_025537.3      |
| 35 | Gene LOC100504608 | protein FAM119B-like                                                 | NM_001205036.1   |
| 35 | Gene Mettl1       | 2810012D02Ri methyltransferase like 1                                | NM_010792.1      |
| 35 | Gene Cyp27b1      | Cyp27b, MGC9 cytochrome P450, family 27, subfamily b, polypeptic     | NM_010009.2      |
| 25 | Gene March9       | March9, BC01 membrane-associated ring finger (C3HC4) 9               | NM_001033262.2   |
| 25 | Gene Cdk4         | Cdk4, Crk3 cyclin-dependent kinase 4                                 | NM_009870.3      |
| 25 | Gene Tspan31      | Tspan31, Sas, tetraspanin 31                                         | NM_025982.4      |
| 25 | Gene A730063      | A730063M14R RIKEN cDNA A730063M14 gene                               | NR_040660.1      |
| 21 | Gene Os9          | 4632413K17Ri amplified in osteosarcoma                               | NM_177614.3, NM  |
| 19 | Gene B4galnt1     | GalNAcT, Gal-T beta-1,4-N-acetyl-galactosaminyl transferase 1        | NM_001244617.1   |
| 19 | Gene Slc26a10     | Slc26a10, MGC solute carrier family 26, member 10                    | NM_177615.3      |
| 20 | Gene Arhgef2      | GEFT, D10ErtD Rho guanine nucleotide exchange factor (GEF) 25        | NM_028027.3, NM  |
| 20 | Gene Dtx3         | Deltex3, mg31 deltex 3 homolog (Drosophila)                          | NM_030714.2      |
| 20 | Gene F420014      | ENSMUSG000 RIKEN cDNA F420014N23 gene                                | NR_045715.1, NR_ |
| 20 | Gene Pip4k2c      | Pip5k2c, Pip4k phosphatidylinositol-5-phosphate 4-kinase, type II, g | NM_054097.3      |
| 23 | Gene Mars         | Mars, Mtrns, methionine-tRNA synthetase                              | NM_001171582.1,  |
| 19 | Gene Gli1         | Gli1, Zfp5, Zfp-GLI-Kruppel family member GLI1                       | NM_010296.2      |
| 19 | Gene Inhbe        | Inhbe                                                                | NM_008382.2      |
| 20 | Gene Ndufa4l2     | Ndufa4l2, BC0 NADH dehydrogenase (ubiquinone) 1 alpha subcom         | NM_001098789.1   |
| 20 | Gene Shmt2        | 2700043D08Ri serine hydroxymethyltransferase 2 (mitochondrial)       | NM_001252316.1   |
| 20 | Gene Nxp4         | AI851051, 111 neurexophilin 4                                        | NM_183297.2      |
| 32 | Gene Stat6        | Stat6 signal transducer and activator of transcription 6             | NM_009284.2      |
| 32 | Gene Nab2         | AI451907, Nab Ngfi-A binding protein 2                               | NM_008668.2, NM  |
| 32 | Gene 1700012      | 1700012D01Ri RIKEN cDNA 1700012D01 gene                              | NR_045171.1      |
| 30 | Gene Tmem194      | MGC40914, Tr transmembrane protein 194                               | NM_001113211.1   |
| 19 | Gene Zbtb39       | mKIAA0352, 7I zinc finger and BTB domain containing 39               | NM_198035.1      |
| 19 | Gene Gpr182       | G10-D, Gpcr22 G protein-coupled receptor 182                         | NM_007412.2      |
| 32 | Gene Prim1        | Prim1, AI3249 DNA primase, p49 subunit                               | NM_008921.2      |
| 32 | Gene Naca         | AL024382, mK nascent polypeptide-associated complex alpha poly       | NM_013608.3, NM  |
| 28 | Gene Ptges3       | Ptges3, Ptges, prostaglandin E synthase 3 (cytosolic)                | NM_019766.4      |
| 28 | Gene Atp5b        | Atp5b                                                                | NM_016774.3      |
| 28 | Gene Mir677       | Mir677, Mirn6 microRNA 677                                           | NR_030442.2      |
| 28 | Gene Baz2a        | AA415431, Ba bromodomain adjacent to zinc finger domain, 2A          | NM_054078.2, XM  |

|    |               |                                                                    |                  |
|----|---------------|--------------------------------------------------------------------|------------------|
| 30 | Gene Gls2     | Lga, A330074Bglutaminase 2 (liver, mitochondrial)                  | NM_001033264.3   |
| 18 | Gene Mip      | Mip, Hfi, Lop, I major intrinsic protein of eye lens fiber         | NM_008600.4      |
| 18 | Gene Timeless | C77407, tim, T timeless circadian clock 1                          | NM_011589.2, NM  |
| 22 | Gene Cs       | Cs, BB234005, citrate synthase                                     | NM_026444.3      |
| 19 | Gene Coq10a   | Coq10a, Gm1, coenzyme Q10 homolog A (yeast)                        | NM_001081040.1   |
| 19 | Gene Ankrd52  | 6430544C07, / ankyrin repeat domain 52                             | NM_172790.2      |
| 26 | Gene Smarcc2  | 5930405J04Ri SWI/SNF related, matrix associated, actin dependen    | NM_198160.2, NM  |
| 37 | Gene Esyt1    | Fam62a, Mbc2 extended synaptotagmin-like protein 1                 | NM_011843.2      |
| 26 | Gene Dgka     | Dgka, 80kDa, / diacylglycerol kinase, alpha                        | NM_016811.2      |
| 26 | Gene Wibg     | A030010B05Ri within bgcn homolog (Drosophila)                      | NM_001170869.2,  |
| 33 | Gene Mmp19    | Mmp19, MGC: matrix metalloproteinase 19                            | NM_021412.2, NM  |
| 33 | Gene Tmem19   | 1110012D08Ri transmembrane protein 198b                            | NM_178066.2      |
| 33 | Gene Dnajc14  | DRIP78, Dnajc: DnaJ (Hsp40) homolog, subfamily C, member 14        | NM_028873.4      |
| 35 | Gene Cd63     | Cd63, Tspan30 CD63 antigen                                         | NM_007653.3, NM  |
| 35 | Gene Rdh5     | AI987873, RDL retinol dehydrogenase 5                              | NM_134006.4      |
| 35 | Gene Bloc1s1  | BLOS1, AI8397 biogenesis of lysosome-related organelles complex-   | NM_015740.3      |
| 35 | Gene Itga7    | [a]7, Itga7, alp integrin alpha 7                                  | NM_008398.2      |
| 34 | Gene Drg1     | AI132520, Drg developmentally regulated GTP binding protein 1      | NM_007879.1      |
| 47 | Gene Patz1    | Zfp278, 84304 POZ (BTB) and AT hook containing zinc finger 1       | NM_019574.3, NM  |
| 22 | Gene Gm1259   | OTTMUSG000i predicted gene 12592                                   | XR_105429.2, XR_ |
| 22 | Gene Pik3ip1  | Hgfl, Pik3ip1, 5 phosphoinositide-3-kinase interacting protein 1   | NM_178149.4      |
| 22 | Gene Limk2    | Limk2, Limk2b, LIM motif-containing protein kinase 2               | NM_173053.1, NM  |
| 22 | Gene Rnf185   | AL033296, Rnf ring finger protein 185                              | NM_145355.4      |
| 26 | Gene Tug1     | Tug1, AI31682 taurine upregulated gene 1                           | NR_002322.1, NR_ |
| 26 | Gene Morc2a   | Zcwcc1, 84304 microrchidia 2A                                      | NM_198162.1, NM  |
| 31 | Gene Ccdc157  | mKIAA1656, KI coiled-coil domain containing 157                    | NM_177616.3, NM  |
| 31 | Gene Sf3a1    | 1200014H24Ri splicing factor 3a, subunit 1                         | NM_026175.5      |
| 22 | Gene Tbc1d10  | mFLJ00288, Tt TBC1 domain family, member 10a                       | NM_134023.1      |
| 22 | Gene Gatsl3   | Gatsl3, 24100C GATS protein-like 3                                 | NM_028022.1      |
| 31 | Gene Mtmr3    | mKIAA0371, 1 myotubularin related protein 3                        | NM_028860.2      |
| 23 | Gene Gas2l1   | GAR22, D0Jmb growth arrest-specific 2 like 1                       | NM_001190406.1   |
| 23 | Gene Rasl10a  | 2210403B10Ri RAS-like, family 10, member A                         | NM_145216.3      |
| 35 | Gene Ewsr1    | Ewsh, Ews, AU Ewing sarcoma breakpoint region 1                    | NM_007968.2      |
| 35 | Gene Rhbdd3   | Rhbdd3, Ptag, rhomboid domain containing 3                         | NM_177370.3      |
| 35 | Gene Emid1    | Emid1, CO-5, / EMI domain containing 1                             | NM_080595.2      |
| 22 | Gene Kremen1  | AV002070, Kre kringle containing transmembrane protein 1           | NM_032396.3      |
| 18 | Gene Znrf3    | Gm1167, AA5 zinc and ring finger 3                                 | NM_001080924.2   |
| 32 | Gene Xbp1     | D11Ert39e, X X-box binding protein 1                               | NM_013842.2      |
| 32 | Gene Ccdc117  | AV173073, Ccc coiled-coil domain containing 117                    | NM_134033.2      |
| 30 | Gene Mrps24   | Mrps24, AI414 mitochondrial ribosomal protein S24                  | NM_026080.2      |
| 30 | Gene Urgcp    | 9130001121Ri upregulator of cell proliferation                     | NM_178623.3, NM  |
| 31 | Gene 2210015  | 1600028117Ri RIKEN cDNA 2210015D19 gene                            | NR_015577.1      |
| 31 | Gene Dbnl     | Abp1, mAbp1, drebrin-like                                          | NM_013810.3, NM  |
| 24 | Gene Aebp1    | Aebp1, ACLP AE binding protein 1                                   | NM_009636.2      |
| 24 | Gene Pold2    | po1D2, p50, 5( polymerase (DNA directed), delta 2, regulatory subu | NM_008894.2      |
| 29 | Gene Gck      | GLK, Gck, MOE glucokinase                                          | NM_010292.4      |
| 29 | Gene Ykt6     | AW105923, Yk YKT6 homolog (S. Cerevisiae)                          | NM_019661.4      |

|    |                   |                                                                       |                  |
|----|-------------------|-----------------------------------------------------------------------|------------------|
| 31 | Gene Nudcd3       | BC024322, NudC domain containing 3                                    | NM_173748.4      |
| 28 | Gene Ddx56        | Noh61, D11Ert DEAD (Asp-Glu-Ala-Asp) box polypeptide 56               | NM_026538.3      |
| 28 | Gene Tmed4        | AI326346, 111 transmembrane emp24 protein transport domain c          | NM_134020.1      |
| 32 | Gene Ogdh         | Ogdh, 221040: oxoglutarate (alpha-ketoglutarate) dehydrogenase (      | NM_001252282.1,  |
| 30 | Gene Zmiz2        | 2410117E06Ri zinc finger, MIZ-type containing 2                       | NM_028601.2, NM  |
| 30 | Gene Ppia         | 2700098C05, C peptidylprolyl isomerase A                              | NM_008907.1      |
| 35 | Gene Purb         | Purb, 2310015 purine rich element binding protein B                   | NM_011221.3      |
| 28 | Gene Myo1g        | Myo1g, E4300i myosin IG                                               | NM_178440.4      |
| 28 | Gene Gm1197       | OTTMUSG000i predicted gene 11974                                      | NR_045893.1      |
| 25 | Gene Ccm2         | BC029157, Ccr cerebral cavernous malformation 2                       | NM_001190343.1   |
| 32 | Gene Tbrg4        | Tbrg4, 231004 transforming growth factor beta regulated gene 4        | NM_134011.2, NM  |
| 32 | Gene Snora5c      | Snora5c, MBI- <del>l</del> small nucleolar RNA, H/ACA box 5C          | NR_034042.1      |
| 32 | Gene Wap          | MGC25317, W whey acidic protein                                       | NM_011709.5      |
| 20 | Gene Igfbp3       | IGfbp3, Igfbp: insulin-like growth factor binding protein 3           | NM_008343.2      |
| 25 | Gene Tns3         | F830010I22Rik tensin 3                                                | NM_001083587.1   |
| 29 | Gene Hus1         | mHus1, Hus1 Hus1 homolog (S. pombe)                                   | NM_008316.4      |
| 29 | Gene Sun3         | MGC130135, [Sad1 and UNC84 domain containing 3                        | NM_177576.3      |
| 24 | Gene Figl1        | Figl1                                                                 | NM_021891.3, NM  |
| 24 | Gene Ddc          | Aadc, Ddc dopa decarboxylase                                          | NM_001190448.1   |
| 27 | Gene Grb10        | mKIAA0207, A growth factor receptor bound protein 10                  | NM_001177629.1   |
| 22 | Gene Egfr         | AI552599, Egfr epidermal growth factor receptor                       | NM_207655.2, NM  |
| 19 | Gene 2810442      | 2810442I21Rik RIKEN cDNA 2810442I21 gene                              | NR_015469.1      |
| 19 | Gene Fbxo48       | A630050E13Ri F-box protein 48                                         | NM_176982.2      |
| 23 | Gene Etaa1        | Etaa1, 573046 Ewing's tumor-associated antigen 1                      | NM_026576.3      |
| 21 | Gene Meis1        | C530044H18Ri Meis homeobox 1                                          | NM_010789.3, NM  |
| 21 | Gene LOC101055656 | uncharacterized LOC101055656                                          | XM_003945472.1,  |
| 28 | Gene Spred2       | Spred2, C7915 sprouty-related, EVH1 domain containing 2               | NM_033523.4      |
| 27 | Gene Actr2        | Actr2, 492151(ARP2 actin-related protein 2                            | NM_146243.2      |
| 30 | Gene Rab1         | Rab-1, mKIAA <del>3</del> RAB1, member RAS oncogene family            | NM_008996.3      |
| 26 | Gene Cep68        | 6030463E10Ri centrosomal protein 68                                   | NM_172260.3      |
| 27 | Gene Slc1a4       | ASCT-1, ASCT1 solute carrier family 1 (glutamate/neutral amino aci    | NM_018861.3      |
| 30 | Gene Sertad2      | MNCb-1504, A SERTA domain containing 2                                | NM_001038625.1   |
| 25 | Gene Aftph        | 9130023F12Ri aftiphilin                                               | NM_001252503.1   |
| 35 | Gene Peli1        | AI586297, Peli pellino 1                                              | NM_023324.2      |
| 23 | Gene Ugp2         | Ugp2, MGC38: UDP-glucose pyrophosphorylase 2                          | NM_139297.5      |
| 22 | Gene Ehbp1        | Flj21950, AF42 EH domain binding protein 1                            | NM_001252515.1   |
| 33 | Gene Tmem17       | Tmem17, AI50 transmembrane protein 17                                 | NM_153596.3      |
| 15 | Gene B3gnt2       | AA408337, BG UDP-GlcNAc:betaGal beta-1,3-N-acetylglucosaminyl         | NM_016888.5, NM  |
| 65 | Gene Commd1       | Commd1, U2/ICOMM domain containing 1                                  | NM_144514.2      |
| 20 | Gene Zrsr1        | Irlgs2, SP2, U2: zinc finger (CCCH type), RNA binding motif and serin | NM_011663.3      |
| 65 | Gene Cct4         | Cct4, A45, 261 chaperonin containing Tcp1, subunit 4 (delta)          | NM_009837.1      |
| 34 | Gene Xpo1         | Crm1, Xpo1, A. exportin 1, CRM1 homolog (yeast)                       | NM_134014.3, NM  |
| 32 | Gene Usp34        | A530081C03Ri ubiquitin specific peptidase 34                          | NM_001190401.2   |
| 32 | Gene Ahsa2        | FLJ36626, 111(AHA1, activator of heat shock protein ATPase 2          | NM_172391.3      |
| 28 | Gene Rel          | c-Rel, Rel reticuloendotheliosis oncogene                             | NM_009044.2      |
| 22 | Gene Papolg       | 9630006B20Ri poly(A) polymerase gamma                                 | NM_172555.2      |
| 15 | Gene A830031      | Gm662, A830C RIKEN cDNA A830031A19 gene                               | XR_035331.1, XR_ |

|    |                   |                                                                      |                  |
|----|-------------------|----------------------------------------------------------------------|------------------|
| 15 | Gene Bcl11a       | Evi9b, Evi9, Cti B cell CLL/lymphoma 11A (zinc finger protein)       | NM_016707.3, NM  |
| 32 | Gene Pnpt1        | PNPase, 1200C polyribonucleotide nucleotidyltransferase 1            | NM_027869.1, XM  |
| 32 | Gene A630052      | A630052C17Ri RIKEN cDNA A630052C17 gene                              | XR_106647.2, XR_ |
| 32 | Gene Smek2        | AW011752, Kl.SMEK homolog 2, suppressor of mek1 (Dictyostelium       | NM_134034.2      |
| 29 | Gene Ccdc88a      | AI848406, C13 coiled coil domain containing 88A                      | NM_176841.3      |
| 31 | Gene Mtif2        | 2310038D14Ri mitochondrial translational initiation factor 2         | NM_133767.2      |
| 31 | Gene Rps27a       | Rps27a, Uba52 ribosomal protein S27A                                 | NM_024277.2, NM  |
| 31 | Gene 1700034      | 1700034F02Rik, Clhc1                                                 | NM_028504.1, NM  |
| 29 | Gene Rtn4         | AA960376, mKreticulon 4                                              | NM_024226.4, NM  |
| 29 | Gene LOC101055730 | uncharacterized LOC101055730                                         | XR_168478.1, XR_ |
| 29 | Gene Gm8098       | Gm8098, EG66 predicted gene 8098                                     | XR_168479.1      |
| 22 | Gene Acyp2        | Acyp2, 23100C acylphosphatase 2, muscle type                         | NM_029344.3      |
| 19 | Gene Psme4        | Psme4, KIAA0C proteasome (prosome, macropain) activator subunit      | NM_134013.3      |
| 32 | Gene Stc2         | Stc2, mustc2, stanniocalcin 2                                        | NM_011491.3      |
| 21 | Gene Il9r         | Il9r, MGC1305 interleukin 9 receptor                                 | NM_008374.2, NM  |
| 21 | Gene Snrnp25      | AL033324, 33C small nuclear ribonucleoprotein 25 (U11/U12)           | NM_030093.3      |
| 26 | Gene Rhbdf1       | Dist1, Egfr-rs, rhomboid family 1 (Drosophila)                       | NM_010117.2      |
| 26 | Gene Mpg          | 9830006D05, N-methylpurine-DNA glycosylase                           | NM_010822.3      |
| 26 | Gene Nprl3        | CGTHBA, HS-40, m(alpha)RE, HS-26, Aag, Prox1, Phg, Nprl3, Mare       | NM_181569.2      |
| 23 | Gene Hba-x        | AI450015, Hba hemoglobin X, alpha-like embryonic chain in Hba co     | NM_010405.4      |
| 30 | Gene Ubtd2        | 4930571L24, Ubiquitin domain containing 2                            | NM_173784.3      |
| 18 | Gene Efcab9       | 1700007I06Rik EF-hand calcium binding domain 9                       | NM_027031.3      |
| 18 | Gene Stk10        | mKIAA4026, G serine/threonine kinase 10                              | NM_009288.2      |
| 28 | Gene Fgf18        | Fgf18, D13005 fibroblast growth factor 18                            | NM_008005.1      |
| 31 | Gene Npm1         | MGC102162, Nucleophosmin 1                                           | NM_001252260.1,  |
| 21 | Gene Tlx3         | Rnx, Hox11l2, T cell leukemia, homeobox 3                            | NM_019916.2      |
| 21 | Gene Ranbp17      | Ranbp17, 4932 RAN binding protein 17                                 | NM_023146.2      |
| 21 | Gene Spdl1        | Spdl1, 281004 spindle apparatus coiled-coil protein 1                | NM_027411.2      |
| 22 | Gene Pank3        | Pank3, MGC38 pantothenate kinase 3                                   | NM_145962.2      |
| 22 | Gene Rars         | AW985894, Rarginyl-tRNA synthetase                                   | NM_025936.3      |
| 22 | Gene Wwc1         | AA408228, mKWW, C2 and coiled-coil domain containing 1               | NM_170779.1      |
| 18 | Gene Tenm2        | D3Bwg1534e, teneurin transmembrane protein 2                         | NM_011856.3      |
| 33 | Gene Mat2b        | MATIIbeta, TG methionine adenosyltransferase II, beta                | NM_134017.2, NM  |
| 33 | Gene Hmnr         | CD168, Hmnr, hyaluronan mediated motility receptor (RHAMM)           | NM_013552.2      |
| 30 | Gene Nudcd2       | Nudcd2, 2700C NudC domain containing 2                               | NM_026023.4      |
| 18 | Gene Pttg1        | C87862, AW55 pituitary tumor-transforming gene 1                     | NM_013917.2, NM  |
| 18 | Gene Slu7         | D3Bwg0878e, SLU7 splicing factor homolog (S. cerevisiae)             | NM_148673.3, NM  |
| 27 | Gene Ccnjl        | Gm877, Ccnjl cyclin J-like                                           | NM_001045530.1   |
| 31 | Gene Ublcp1       | 8430435I17Rik ubiquitin-like domain containing CTD phosphatase 1     | NM_024475.5, XM  |
| 31 | Gene Rnf145       | 3732413I11Rik ring finger protein 145                                | NM_028862.3, NM  |
| 20 | Gene Ebf1         | Ebf, O/E-1, Ebf early B cell factor 1                                | NM_007897.2      |
| 21 | Gene F630206      | F630206G17Ri RIKEN cDNA F630206G17 gene                              | NR_045876.1      |
| 21 | Gene Clint1       | KIAA0171, AW clathrin interactor 1                                   | NM_001045520.3   |
| 23 | Gene Lsm11        | Lsm11, 22104C U7 snRNP-specific Sm-like protein LSM11                | NM_028185.2      |
| 23 | Gene Thg1l        | Thg1l, 170012 tRNA-histidine guanylyltransferase 1-like (S. cerevisi | NM_001080969.2   |
| 18 | Gene Cyfip2       | 1500004I01Rik cytoplasmic FMR1 interacting protein 2                 | NM_001252459.1   |
| 19 | Gene Med7         | Crsp9, Crsp33, mediator complex subunit 7                            | NM_025426.3, NM  |

|    |                   |                                                                     |                  |
|----|-------------------|---------------------------------------------------------------------|------------------|
| 38 | Gene Gnb2l1       | Rack1, Gnb2-r: guanine nucleotide binding protein (G protein), beta | NM_008143.3      |
| 38 | Gene Snord96      | Snord96a small nucleolar RNA, C/D box 96A                           | NR_028563.1      |
| 38 | Gene Snord95      | Snord95 small nucleolar RNA, C/D box 95                             | NR_028564.1      |
| 38 | Gene Trim41       | R75223, AW55 tripartite motif-containing 41                         | NM_145377.2      |
| 24 | Gene Trim7        | Trim7, AI7903: tripartite motif-containing 7                        | NM_053166.2      |
| 24 | Gene Gm1617       | OTTMUSG000i predicted gene 16170                                    | XR_141058.1, XR_ |
| 17 | Gene Olfr1394     | Olfr1394, MOF olfactory receptor 1394                               | NM_146276.1      |
| 17 | Gene Btnl9        | D330012D11R butyrophilin-like 9                                     | NM_172793.2      |
| 34 | Gene Zfp62        | AI227021, Zfp zinc finger protein 62                                | NM_001024846.1   |
| 31 | Gene Cnot6        | CCR4, MGC98 CCR4-NOT transcription complex, subunit 6               | NM_212484.1      |
| 24 | Gene Gfpt2        | GFAT2, AI4805 glutamine fructose-6-phosphate transaminase 2         | NM_013529.3      |
| 24 | Gene Mapk9        | AI851083, JNK mitogen-activated protein kinase 9                    | NM_207692.2, NM  |
| 23 | Gene Tbc1d9b      | AU019384, Tbc1 TBC1 domain family, member 9B                        | NM_029745.2      |
| 39 | Gene 3010026      | AI851514, 301 RIKEN cDNA 3010026O09 gene                            | NM_026543.3      |
| 39 | Gene Sqstm1       | STAP, p62, Sqs sequestosome 1                                       | NM_011018.2      |
| 25 | Gene Mgat4b       | Mgat4b, GnTIV mannoside acetylglucosaminyltransferase 4, isoenzyme  | NM_145926.3      |
| 25 | Gene Ltc4s        | Ltc4s                                                               | NM_008521.1      |
| 29 | Gene Maml1        | mKIAA0200, A mastermind like 1 (Drosophila)                         | NM_175334.3      |
| 34 | Gene Canx         | AI988026, Cnx calnexin                                              | NM_007597.3, NM  |
| 43 | Gene Hnrnph1      | Hnrnph1, Hnr heterogenous nuclear ribonucleoprotein H1              | NM_021510.2      |
| 24 | Gene Adamts2      | hPCPNI, A430C a disintegrin-like and metallopeptidase (reprolysin t | NM_175643.2      |
| 28 | Gene BC04976      | 4930503F14, E cDNA sequence BC049762                                | NM_177567.3      |
| 28 | Gene Clk4         | C85119, Clk4, CDC like kinase 4                                     | NM_007714.5      |
| 37 | Gene Agxt2l2      | Agxt2l2, 2900C alanine-glyoxylate aminotransferase 2-like 2         | NM_028398.2      |
| 37 | Gene Hnrnpab      | Hnrnpab, CBF- heterogenous nuclear ribonucleoprotein A/B            | NM_010448.3, NM  |
| 33 | Gene Nhp2         | Nola2, Nhp2, NHP2 ribonucleoprotein                                 | NM_026631.3      |
| 33 | Gene Rmnd5b       | 0610039K22Ri required for meiotic nuclear division 5 homolog B (S   | NM_025346.1      |
| 26 | Gene N4bp3        | N4bp3, C3300: NEDD4 binding protein 3                               | NM_145974.3      |
| 17 | Gene D930048      | D930048N14R RIKEN cDNA D930048N14 gene                              | NR_027958.1      |
| 36 | Gene Sec24a       | 9430090N21Ri Sec24 related gene family, member A (S. cerevisiae)    | NM_175255.3      |
| 36 | Gene Sar1b        | Sara2, Sar1b, SAR1 gene homolog B (S. cerevisiae)                   | NM_025535.2      |
| 29 | Gene Phf15        | mKIAA0239, 1: PHD finger protein 15                                 | NM_199299.3      |
| 27 | Gene Ube2b        | E2-14k, Ube2b, mHR6B, HR6B, Rad6b, 2610301N02Rik                    | NM_009458.4      |
| 27 | Gene Cdkl3        | B230379H01Ri cyclin-dependent kinase-like 3                         | NM_153785.4, NM  |
| 40 | Gene Ppp2ca       | PP2A, R75353, protein phosphatase 2 (formerly 2A), catalytic subun  | NM_019411.4      |
| 30 | Gene Skp1a        | 2610206H23Ri S-phase kinase-associated protein 1A                   | NM_011543.4      |
| 30 | Gene LOC101056192 | uncharacterized LOC101056192                                        | XR_168612.1, XR_ |
| 24 | Gene Tcf7         | Tcf1, Tcf7, TCF transcription factor 7, T cell specific             | NM_009331.3      |
| 24 | Gene A630014      | A630014C17Ri RIKEN cDNA A630014C17 gene                             | XR_106661.1, XR_ |
| 33 | Gene Vdac1        | Vdac1, Vdac5, voltage-dependent anion channel 1                     | NM_011694.4      |
| 17 | Gene Fstl4        | mKIAA1061, F: follistatin-like 4                                    | NM_177059.3      |
| 48 | Gene Hspa4        | Hsp110, APG-2 heat shock protein 4                                  | NM_008300.3      |
| 24 | Gene Aff4         | MGC107469, AF4/FMR2 family, member 4                                | NM_033565.2      |
| 26 | Gene Gm1044       | Gm10447, ENS predicted gene 10447                                   | XR_141090.1, XR_ |
| 26 | Gene Shroom1      | Shroom1, Shrn shroom family member 1                                | NM_027917.2      |
| 22 | Gene Gm9837       | ENSMUSG000i predicted gene 9837                                     | XR_035310.2, XR_ |
| 22 | Gene Sowaha       | Ankrd43, Sow: sosondowah ankyrin repeat domain family member        | NM_183173.2      |

|    |               |              |                                                                |                  |
|----|---------------|--------------|----------------------------------------------------------------|------------------|
| 22 | Gene Gm1983   | Gm19835      | predicted gene, 19835                                          | XR_106662.1, XR_ |
| 31 | Gene A430108  | A430108G06R  | RIKEN cDNA A430108G06 gene                                     | XR_106663.1, XR_ |
| 31 | Gene Kif3a    | 111-11-86,   | AM kinesin family member 3A                                    | NM_008443.3      |
| 28 | Gene Rad50    | Rad50I,      | Mrell, RAD50 homolog (S. cerevisiae)                           | NM_009012.2      |
| 34 | Gene Irf1     | Irf-1,       | Irf1, AU0 interferon regulatory factor 1                       | NM_008390.2, NM  |
| 20 | Gene Slc22a21 | Slc22a9,     | Octn3 solute carrier family 22 (organic cation transporter),   | NM_019723.2      |
| 20 | Gene Slc22a4  | Octn1,       | Slc22a4 solute carrier family 22 (organic cation transporter), | NM_019687.3      |
| 22 | Gene Fnip1    | AI838773,    | A73 folliculin interacting protein 1                           | NM_173753.4      |
| 35 | Gene Cdc42se  | Cdc42se2,    | SPE CDC42 small effector 2                                     | NM_178626.3      |
| 29 | Gene Lyrn7    | Lyrn7,       | 933014LYR motif containing 7                                   | NM_029327.3      |
| 29 | Gene Hint1    | Hint,        | AA67347 histidine triad nucleotide binding protein 1           | NM_008248.2      |
| 26 | Gene Tnip1    | ABIN1,       | VAN, N TNFAIP3 interacting protein 1                           | NM_001199275.1   |
| 32 | Gene Anxa6    | AW107198,    | Ca annexin A6                                                  | NM_013472.4, NM  |
| 33 | Gene Gm2a     | Gm2a,        | AA4087GM2 ganglioside activator protein                        | NM_010299.3      |
| 20 | Gene 4921508  | 4921508A21Ri | RIKEN cDNA 4921508A21 gene                                     | NR_046034.1      |
| 20 | Gene Slc36a1  | Slc36a1,     | AI839 solute carrier family 36 (proton/amino acid symport      | NM_153139.4      |
| 20 | Gene Fam114   | Fam114a2,    | 90: family with sequence similarity 114, member A2             | NM_026342.3, NM  |
| 20 | Gene Mfap3    | 2610509F16Ri | microfibrillar-associated protein 3                            | NM_180599.1, NM  |
| 22 | Gene Galnt10  | GalNAc-T10,  | A UDP-N-acetyl-alpha-D-galactosamine:polypeptide N             | NM_134189.2      |
| 22 | Gene 4933426  | 4933426K07Ri | RIKEN cDNA 4933426K07 gene                                     | XR_106230.1      |
| 26 | Gene Sap30l   | MGC151408,   | L SAP30-like                                                   | NM_001081168.1   |
| 46 | Gene Larp1    | Larp,        | 1810024. La ribonucleoprotein domain family, member 1          | NM_028451.1      |
| 28 | Gene Gemin5   | C330013N08,  | gem (nuclear organelle) associated protein 5                   | NM_172558.3, NM  |
| 28 | Gene Mrpl22   | Mrpl22,      | HSPC1 mitochondrial ribosomal protein L22                      | NM_175001.3      |
| 21 | Gene Zfp692   | AI746306,    | Zfp6 zinc finger protein 692                                   | NM_001040686.1   |
| 21 | Gene Zfp672   | Zfp672,      | 49304 zinc finger protein 672                                  | NM_001256516.1   |
| 26 | Gene Trim17   | Rnf16,       | Trim17, tripartite motif-containing 17                         | NM_031172.2      |
| 26 | Gene 2310058  | 2310058D17Ri | RIKEN cDNA 2310058D17 gene                                     | XR_106668.1, XR_ |
| 26 | Gene Trim11   | Trim11       |                                                                | NM_053168.1      |
| 28 | Gene Gjc2     | B230382L12Ri | gap junction protein, gamma 2                                  | NM_080454.4, NM  |
| 28 | Gene Guk1     | Gmk,         | AL03329 guanylate kinase 1                                     | NM_008193.3, NM  |
| 41 | Gene 2610507  | 2610507I01Ri | RIKEN cDNA 2610507I01 gene                                     | NR_037964.1      |
| 41 | Gene Mrpl55   | 2810038N09Ri | mitochondrial ribosomal protein L55                            | NM_026035.2      |
| 41 | Gene 2310033  | MGC7354,     | 231RIKEN cDNA 2310033P09 gene                                  | NM_024210.2      |
| 41 | Gene Arf1     | Arf1         | ADP-ribosylation factor 1                                      | NM_007476.3, NM  |
| 19 | Gene Zkscan1  | Nizp1,       | BC0402 zinc finger with KRAB and SCAN domains 17               | NM_172941.3, NM  |
| 19 | Gene 4933439  | 2610028M21R  | RIKEN cDNA 4933439C10 gene                                     | NR_015585.2      |
| 19 | Gene Mprp     | p116Rip,     | MGC myosin phosphatase Rho interacting protein                 | NM_201245.3, NM  |
| 43 | Gene Cops3    | Csn3,        | Cops3, S COP9 (constitutive photomorphogenic) homolog, su      | NM_011991.1      |
| 43 | Gene Nt5m     | dNT-2,       | 2010015',3'-nucleotidase, mitochondrial                        | NM_134029.2      |
| 28 | Gene Med9     | Med25,       | MGC3 mediator of RNA polymerase II transcription, subuni       | NM_138675.3      |
| 28 | Gene Rasd1    | Dexas1,      | Rasd:RAS, dexamethasone-induced 1                              | NM_009026.4      |
| 28 | Gene Pemt     | Pempt2,      | AI255 phosphatidylethanolamine N-methyltransferase             | NM_008819.2      |
| 34 | Gene Rai1     | Gt1,         | Rai1 retinoic acid induced 1                                   | NM_001037764.1   |
| 34 | Gene 4930412  | 4930412M03R  | RIKEN cDNA 4930412M03 gene                                     | XR_141096.2      |
| 18 | Gene Srebf1   | bHLHd1,      | ADD1 sterol regulatory element binding transcription fact      | NM_011480.3      |
| 28 | Gene Atpaf2   | ATP12p,      | Atpaf ATP synthase mitochondrial F1 complex assembly fa        | NM_145427.2      |

|    |      |              |              |                                                                     |                  |
|----|------|--------------|--------------|---------------------------------------------------------------------|------------------|
| 28 | Gene | Gid4         | 4933439F18Ri | GID complex subunit 4, VID24 homolog (S. cerevisiae)                | NM_025757.4      |
| 40 | Gene | Myo15        |              | sh-2, Myo15, s myosin XV                                            | NM_010862.2, NM  |
| 40 | Gene | Alkbh5       |              | Ofoxd, Alkbh5, alkB, alkylation repair homolog 5 (E. coli)          | NM_172943.4      |
| 24 | Gene | Llgl1        |              | Llglh, AI32517I lethal giant larvae homolog 1 (Drosophila)          | NM_008502.2, NM  |
| 23 | Gene | Flii         |              | Flii, Fliih, 3632. flightless I homolog (Drosophila)                | NM_022009.1      |
| 23 | Gene | Smcr7        |              | Gm11, AI4821I Smith-Magenis syndrome chromosome region, cand        | NM_001009927.1   |
| 23 | Gene | Mir5100      |              | mu-mir-5100, microRNA 5100                                          | NR_039559.1      |
| 37 | Gene | Tmem11A      | AA409091,    | Tm transmembrane protein 11                                         | NM_173453.3, NM  |
| 31 | Gene | Gm1651       |              | Gm16515, Gtlf predicted gene, Gm16515                               | NM_025294.5      |
| 31 | Gene | Gm1651       |              | Gm16516, F3-: predicted gene, Gm16516                               | NR_027800.1      |
| 33 | Gene | Usp22        |              | MGC91200, U: ubiquitin specific peptidase 22                        | NM_001004143.4   |
| 29 | Gene | Aldh3a2      |              | Aldh4, Ahd3, A aldehyde dehydrogenase family 3, subfamily A2        | NM_007437.4      |
| 23 | Gene | Slc47a2      |              | Slc47a2, 49334 solute carrier family 47, member 2                   | NM_001033542.2   |
| 23 | Gene | Slc47a1      |              | 1300013J15Ri solute carrier family 47, member 1                     | NM_026183.5      |
| 32 | Gene | Gm1227       |              | Gm12271, OTI predicted gene 12271                                   | XM_890719.4      |
| 31 | Gene | Mfap4        |              | 1110007F23Ri microfibrillar-associated protein 4                    | NM_029568.2      |
| 31 | Gene | Mapk7        |              | BMK1, PRKM7 mitogen-activated protein kinase 7                      | NM_011841.1      |
| 31 | Gene | 3110043      | 3110043A19Ri | RIKEN cDNA 3110043A19 gene                                          | XR_141098.1      |
| 23 | Gene | B9d1         |              | Eppb9, B9, AW B9 protein domain 1                                   | NM_013717.2      |
| 23 | Gene | Epn2         |              | Epn2, 9530051 epsin 2                                               | NM_001252188.1   |
| 33 | Gene | Ulk2         |              | Ulk2, mKIAA06unc-51 like kinase 2                                   | NM_013881.4      |
| 28 | Gene | Akap10       |              | Akap10, D-AK/ A kinase (PRKA) anchor protein 10                     | NM_019921.2      |
| 20 | Gene | LOC101055684 |              | cytospin-B-like                                                     | XM_003945641.1   |
| 24 | Gene | Specc1       |              | KIAA4061, B230396K10Rik, mKIAA4061, Specc1, Cytsb, 2810012G0        | NM_001029936.2   |
| 26 | Gene | Adora2b      |              | AI480866, MG adenosine A2b receptor                                 | NM_007413.4      |
| 27 | Gene | Ncor1        |              | mKIAA1047, 5' nuclear receptor co-repressor 1                       | NM_001252313.1   |
| 27 | Gene | Pigl         |              | Pigl, MGC1068 phosphatidylinositol glycan anchor biosynthesis, cla  | NM_001039536.2   |
| 23 | Gene | Gm1227       |              | OTTMUSG000I predicted gene 12279                                    | XR_106673.1, XR_ |
| 23 | Gene | Ubb          |              | Rps27a, Ubb2, ubiquitin B                                           | NM_011664.3      |
| 44 | Gene | Trpv2        |              | Trpv2, Vrl1, GF transient receptor potential cation channel, subfam | NM_011706.2      |
| 44 | Gene | 2410006      | 2410006H16Ri | RIKEN cDNA 2410006H16 gene                                          | NR_030738.1      |
| 44 | Gene | Snord49      |              | MBII-252, Snoi small nucleolar RNA, C/D box 49B                     | NR_028526.1      |
| 44 | Gene | Snord49      |              | MBII-243, Snoi small nucleolar RNA, C/D box 49A                     | NR_028550.1      |
| 44 | Gene | Snord65      |              | MBII-135, Snoi small nucleolar RNA, C/D box 65                      | NR_028541.1      |
| 44 | Gene | Fam211       |              | BC046404, Far family with sequence similarity 211, member A         | NM_198861.1      |
| 24 | Gene | Mmgt2        |              | AI852046, Mm membrane magnesium transporter 2                       | NM_175002.2      |
| 20 | Gene | Fbxw10       |              | Fbw10, Fbxw1 F-box and WD-40 domain protein 10                      | NM_001033669.2   |
| 20 | Gene | Tvp23b       |              | 1810036I24Rik trans-golgi network vesicle protein 23B               | NM_026210.4      |
| 25 | Gene | Pmp22        |              | Pmp22, HNPP, peripheral myelin protein 22                           | NM_008885.2      |
| 25 | Gene | Hs3st3b      |              | Hs3st3b, AU04 heparan sulfate (glucosamine) 3-O-sulfotransferase    | NM_018805.2      |
| 27 | Gene | F930015      | F930015N05Ri | RIKEN cDNA F930015N05 gene                                          | NR_028445.1      |
| 27 | Gene | Hs3st3a      |              | Hs3st3a, Hs3st heparan sulfate (glucosamine) 3-O-sulfotransferase   | NM_178870.5      |
| 16 | Gene | Map2k4       |              | Serk1, Sek1, M mitogen-activated protein kinase kinase 4            | NM_009157.4      |
| 16 | Gene | LOC101055694 |              | uncharacterized LOC101055694                                        | XR_168613.1      |
| 19 | Gene | Dnahc9       |              | mKIAA0357, 9I dynein, axonemal, heavy chain 9                       | NM_001099633.1   |
| 21 | Gene | Shisa6       |              | Shisa6, Gm879 shisa homolog 6 (Xenopus laevis)                      | NM_001034874.3   |
| 24 | Gene | Myh10        |              | Myhn2, Myhn- myosin, heavy polypeptide 10, non-muscle               | NM_175260.2      |



|    |              |                                                                                       |                  |
|----|--------------|---------------------------------------------------------------------------------------|------------------|
| 36 | Gene Rnf222  | Rnf222, 99300 ring finger protein 222                                                 | NM_177060.3      |
| 36 | Gene Rpl26   | SIG-20, Rpl26 ribosomal protein L26                                                   | NM_009080.2      |
| 28 | Gene Ctc1    | AAF132, 1500CTS telomere maintenance complex component 1                              | NM_001013256.2   |
| 28 | Gene Aurkb   | STK-1, Stk5, Aurora kinase B                                                          | NM_011496.1      |
| 26 | Gene 2310047 | 2310047M10Rik                                                                         | NM_028005.3      |
| 26 | Gene Tmem10C | 1110004B13Ri transmembrane protein 107                                                | NM_025838.2, NM  |
| 37 | Gene Vamp2   | Syb2, Syb-2, VAMP vesicle-associated membrane protein 2                               | NM_009497.3      |
| 37 | Gene Per1    | Per1, mPer1, Mperiod circadian clock 1                                                | NM_011065.4, NM  |
| 28 | Gene 9130213 | 9130213A22Ri RIKEN cDNA 9130213A22 gene                                               | XR_141105.2, XR_ |
| 28 | Gene Hes7    | bHLHb37, Hes7 hairy and enhancer of split 7 (Drosophila)                              | NM_033041.4      |
| 28 | Gene Aloxe3  | Aloxe3, MGC1 arachidonate lipoxygenase 3                                              | NM_011786.2      |
| 22 | Gene Gucy2e  | GC-E, GC1, Guanylate cyclase 2e                                                       | NM_008192.3      |
| 26 | Gene Cntrob  | 9830165K03Ri centrobins, centrosomal BRCA2 interacting protein                        | NM_172560.3      |
| 26 | Gene Trappc1 | MUM2, BET5, trafficking protein particle complex 1                                    | NM_001024206.2   |
| 26 | Gene Kcnab3  | Kcnab4, Kcnab potassium voltage-gated channel, shaker-related subunit                 | NM_010599.4      |
| 18 | Gene A030009 | A030009H04R RIKEN cDNA A030009H04 gene                                                | NR_027827.1      |
| 23 | Gene Chd3    | 2600010P09Ri chromodomain helicase DNA binding protein 3                              | NM_146019.3      |
| 25 | Gene Cyb5d1  | Gm740, Cyb5d cytochrome b5 domain containing 1                                        | NM_001045525.1   |
| 25 | Gene Lsm1    | Lsm1, 15000LSM domain containing 1                                                    | NM_030083.2      |
| 31 | Gene Tmem88  | Tmem88, 2600transmembrane protein 88                                                  | NM_025915.4      |
| 31 | Gene Kdm6b   | Jmjd3, KIAA03KDM1 lysine (K)-specific demethylase 6B                                  | NM_001017426.1   |
| 31 | Gene Dnahc2  | 4930564A01, Dynein, axonemal, heavy chain 2                                           | NM_001081330.1   |
| 19 | Gene Efnb3   | NLERK-2, Epl8, ephrin B3                                                              | NM_007911.5      |
| 19 | Gene Wrap53  | Wdr79, BC021 WD repeat containing, antisense to TP53                                  | NM_144824.2      |
| 33 | Gene Atp1b2  | Amog, Atp1b2 ATPase, Na <sup>+</sup> /K <sup>+</sup> transporting, beta 2 polypeptide | NM_013415.5      |
| 33 | Gene Shbg    | Shbg, ABP sex hormone binding globulin                                                | NM_011367.2      |
| 23 | Gene Sat2    | MGC74376, SS spermidine/spermine N1-acetyl transferase 2                              | NM_026991.2      |
| 23 | Gene Fxr2    | Fxr2h, Fxr2 fragile X mental retardation, autosomal homolog 2                         | NM_011814.2      |
| 23 | Gene Mir467f | mmu-mir-467f microRNA 467f                                                            | NR_035420.1      |
| 54 | Gene Mpdu1   | Supl15h, Mpdu1 mannose-P-dolichol utilization defect 1                                | NM_011900.3      |
| 54 | Gene Mir1934 | Mir1934, mmu microRNA 1934                                                            | NR_035455.1      |
| 54 | Gene Cd68    | gp110, Scard1, CD68 antigen                                                           | NM_009853.1      |
| 54 | Gene Eif4a1  | Ddx2a, BM-01 eukaryotic translation initiation factor 4A1                             | NM_144958.4, NM  |
| 54 | Gene Senp3   | Smt3ip1, AA40SUMO/sentrin specific peptidase 3                                        | NM_030702.4, NM  |
| 54 | Gene 2010012 | 2010012P19Ri RIKEN cDNA 2010012P19 gene                                               | XR_106197.1      |
| 54 | Gene Tnfsf13 | Trdl1, Tnfsf13, tumor necrosis factor (ligand) superfamily, member 13                 | NM_023517.2, NM  |
| 54 | Gene BC09644 | BC096441, Twi cDNA sequence BC096441                                                  | NM_001034097.2   |
| 28 | Gene Tnfsf12 | Tnfsf12, APO3 tumor necrosis factor (ligand) superfamily, member 12                   | NM_011614.3      |
| 23 | Gene Polr2a  | Rpb1, 220kDa, polymerase (RNA) II (DNA directed) polypeptide A                        | NM_009089.2      |
| 23 | Gene Slc35g3 | Amac1, Slc35g solute carrier family 35, member G3                                     | NM_019871.2      |
| 23 | Gene Zbtb4   | Zbtb4, 231002 zinc finger and BTB domain containing 4                                 | NM_029348.2      |
| 23 | Gene Chrn1   | Achr-2, Chrn1 cholinergic receptor, nicotinic, beta polypeptide 1 (rat)               | NM_009601.4      |
| 23 | Gene Fgf11   | Fhf3, Fgf11 fibroblast growth factor 11                                               | NM_010198.1      |
| 23 | Gene Tmem10C | Tmem102, Cb2 transmembrane protein 102                                                | NM_001033433.4   |
| 23 | Gene G630025 | 4632403M07R RIKEN cDNA G630025P09 gene                                                | NR_027913.1      |
| 21 | Gene 4933402 | 4933402P03Rik, RP23-422L16.21                                                         | NM_175368.1      |
| 21 | Gene Spem1   | RP23-422L16.2 sperm maturation 1                                                      | NM_028855.1      |

|    |               |                 |                                                        |                 |
|----|---------------|-----------------|--------------------------------------------------------|-----------------|
| 21 | Gene Nlgn2    | NL2, MGC6738    | neuroigin 2                                            | NM_198862.2     |
| 18 | Gene Tmem95   | Tmem95, 4325    | transmembrane protein 95                               | NM_001195710.1  |
| 18 | Gene Kctd11   | Ren, Kctd11, A  | potassium channel tetramerisation domain containi      | NM_153143.4     |
| 21 | Gene Acap1    | MGC25782, Cε    | ArfGAP with coiled-coil, ankyrin repeat and PH dom     | NM_153788.3     |
| 21 | Gene 2810408  | 1700019L01Ri    | RIKEN cDNA 2810408A11 gene                             | NM_027419.3     |
| 37 | Gene Neurl4   | 0610025P10Ri    | neuralized homolog 4 (Drosophila)                      | NM_001013414.2  |
| 37 | Gene Gps2     | AI505953, Gps   | G protein pathway suppressor 2                         | NM_019726.3     |
| 37 | Gene Eif5a    | MGC6725, Eif4   | eukaryotic translation initiation factor 5A            | NM_001166589.1, |
| 22 | Gene Elp5     | Rai12, Derp6, I | elongator acetyltransferase complex subunit 5          | NM_018740.2, NM |
| 30 | Gene Ctdnep1  | 2610507E10Ri    | CTD nuclear envelope phosphatase 1                     | NM_026017.2     |
| 30 | Gene Gabarap  | Gabarap         | gamma-aminobutyric acid receptor associated prote      | NM_019749.4     |
| 30 | Gene Phf23    | Phf23, 241014   | PHD finger protein 23                                  | NM_030064.3     |
| 30 | Gene Dvl2     | Dvl2            |                                                        | NM_007888.3     |
| 30 | Gene Acadvl   | vlcad, Acadvl   | acyl-Coenzyme A dehydrogenase, very long chain         | NM_017366.2     |
| 17 | Gene Slc16a11 | Slc16a11, RP23  | :solute carrier family 16 (monocarboxylic acid transp  | NM_153081.3     |
| 17 | Gene Slc16a13 | Slc16a13, RP23  | :solute carrier family 16 (monocarboxylic acid transp  | NM_172371.3     |
| 22 | Gene Bcl6b    | Bcl6b, Bazf     | B cell CLL/lymphoma 6, member B                        | NM_007528.3     |
| 22 | Gene Mir497   | Mir497, mmu-    | microRNA 497                                           | NR_030444.1     |
| 22 | Gene Mir195   | mmu-mir-195,    | microRNA 195                                           | NR_029581.1     |
| 22 | Gene 061001C  | AU045833, ALI   | RIKEN cDNA 0610010K14 gene                             | NM_001177601.1  |
| 22 | Gene Rnasek   | D11Bwg0434e     | ribonuclease, RNase K                                  | NM_173742.3     |
| 22 | Gene Alox12   | 9930022G08Ri    | arachidonate 12-lipoxygenase                           | NM_007440.4     |
| 24 | Gene Pelp1    | MNAR, 493056    | (proline, glutamic acid and leucine rich protein 1     | NM_029231.4     |
| 29 | Gene Arrb2    | RP23-42P20.7,   | arrestin, beta 2                                       | NM_145429.4     |
| 25 | Gene Tm4sf5   | 2010003F10Ri    | transmembrane 4 superfamily member 5                   | NM_029360.3     |
| 25 | Gene Vmo1     | Gm741, Vmo1     | vitelline membrane outer layer 1 homolog (chicken)     | NM_001013607.1  |
| 25 | Gene Gltpd2   | MGC37941, C7    | glycolipid transfer protein domain containing 2        | NM_146020.1     |
| 25 | Gene Psmb6    | Mpnd, Psmb6,    | proteasome (prosome, macropain) subunit, beta type     | NM_008946.4     |
| 29 | Gene Pld2     | Pld2            |                                                        | NM_008876.2     |
| 29 | Gene Mink1    | RP23-122P1.6,   | misshapen-like kinase 1 (zebrafish)                    | NM_001045964.1, |
| 24 | Gene Gp1ba    | Gp1ba, GPIba    | glycoprotein 1b, alpha polypeptide                     | NM_010326.2     |
| 48 | Gene Slc25a11 | Slc25a11, 231C  | (solute carrier family 25 (mitochondrial carrier oxogl | NM_024211.3     |
| 48 | Gene Rnf167   | 5730408C10Ri    | ring finger protein 167                                | NM_027445.1     |
| 48 | Gene Pfn1     | Pfn, Pfn1       | profilin 1                                             | NM_011072.4     |
| 48 | Gene Eno3     | Eno-3, Eno3     | enolase 3, beta muscle                                 | NM_007933.2, NM |
| 48 | Gene Spag7    | FSA-1, MGC67    | sperm associated antigen 7                             | NM_172561.3, NM |
| 22 | Gene Camta2   | RP23-326P7.7,   | calmodulin binding transcription activator 2           | NM_001190376.1  |
| 22 | Gene Inca1    | AI842396, Inca  | inhibitor of CDK, cyclin A1 interacting protein 1      | NM_213729.1, NM |
| 19 | Gene Kif1c    | B430105J22Ri    | kinesin family member 1C                               | NM_153103.2     |
| 26 | Gene Zfp3     | Zfp3, Zfp-3, Fn | zinc finger protein 3                                  | NM_177565.3     |
| 25 | Gene Rabep1   | MGC150053, r    | rabaptin, RAB GTPase binding effector protein 1        | NM_019400.2     |
| 23 | Gene Nup88    | Prei2, 88kDa, I | nucleoporin 88                                         | NM_172394.2, NM |
| 43 | Gene Rpain    | Rpain, 240000   | RPA interacting protein                                | NM_001252413.1  |
| 43 | Gene C1qbp    | P32, AA40736    | :complement component 1, q subcomponent binding        | NM_007573.2     |
| 43 | Gene Dhx33    | 3110057P17Ri    | DEAH (Asp-Glu-Ala-His) box polypeptide 33              | NM_178367.4     |
| 27 | Gene Derl2    | Derlin-2, Derl2 | Der1-like domain family, member 2                      | NM_033562.3     |
| 26 | Gene 4933427  | C85113, Kiaa0   | RIKEN cDNA 4933427D14 gene                             | NM_028963.2     |

|    |              |                |                                                             |                 |
|----|--------------|----------------|-------------------------------------------------------------|-----------------|
| 26 | Gene Txndc17 | Txn15, D11Ert  | thioredoxin domain containing 17                            | NM_026559.3     |
| 26 | Gene Med31   | 3110004H13Ri   | mediator of RNA polymerase II transcription, subunit 1      | NM_026068.2     |
| 26 | Gene 4930563 | 4930563E22Ri   | RIKEN cDNA 4930563E22 gene                                  | NM_001163728.1  |
| 48 | Gene Smtnl2  | D130058I21Ri   | smoothelin-like 2                                           | NM_177776.3     |
| 31 | Gene Ggt6    | 9030405D14Ri   | gamma-glutamyltransferase 6                                 | NM_027819.2     |
| 31 | Gene Mybbp1  | P160,          | Mybbp1 MYB binding protein (P160) 1a                        | NM_016776.2     |
| 31 | Gene Spns2   | Spns2,         | MGC37865                                                    | NM_153060.2     |
| 19 | Gene Spns3   | Spns3,         | 9830002I17Rik                                               | NM_029932.3     |
| 42 | Gene Ube2g1  | 2700059C12Rik, | AW552068, Ube2g1, AU014992, D130023C12Rik,                  | NM_025985.4     |
| 33 | Gene Cyb5d2  | 9330151E16Ri   | cytochrome b5 domain containing 2                           | NM_001024926.3  |
| 33 | Gene Zzef1   | mKIAA0399,     | Zz zinc finger, ZZ-type with EF hand domain 1               | NM_001045536.2  |
| 21 | Gene Atp2a3  | Atp2a3,        | Serca ATPase, Ca <sup>++</sup> transporting, ubiquitous     | NM_016745.3, NM |
| 21 | Gene P2rx1   | BB122383,      | P2rx1 purinergic receptor P2X, ligand-gated ion channel, 1  | NM_008771.3     |
| 27 | Gene Camkk1  | CaMKKalpha,    | (calcium/calmodulin-dependent protein kinase kinase 1)      | NM_018883.2     |
| 27 | Gene 1200014 | C78393,        | 1200014J11Rik, C130061O14Rik                                | NM_025818.3     |
| 40 | Gene Itgae   | aM290,         | A5300 integrin alpha E, epithelial-associated               | NM_172944.2, NM |
| 40 | Gene Gsg2    | Gsg2,          | Haspin, lgerm cell-specific gene 2                          | NM_010353.2     |
| 26 | Gene P2rx5   | P2X5,          | P2rx5 purinergic receptor P2X, ligand-gated ion channel, 5  | NM_033321.3     |
| 26 | Gene Emc6    | 0610009E20Ri   | ER membrane protein complex subunit 6                       | NM_025318.3, NM |
| 26 | Gene Tax1bp3 | 1300011C24Ri   | Tax1 (human T cell leukemia virus type I) binding protein 3 | NM_029564.2     |
| 26 | Gene Ctns    | AW049661,      | Al cystinosis, nephropathic                                 | NM_031251.4     |
| 44 | Gene E130309 | E130309D14Rik  |                                                             | NM_001013784.1  |
| 44 | Gene Cluh    | mKIAA0664,     | 1: clustered mitochondria (cluA/CLU1) homolog               | NM_001081158.2  |
| 24 | Gene Pafah1b | MMS10-U,       | Paf platelet-activating factor acetylhydrolase, isoform 1   | NM_013625.4, NR |
| 31 | Gene Mnt     | Mnt,           | bHLHd3, max binding protein                                 | NM_010813.3     |
| 42 | Gene Sgsm2   | Rutbc1,        | mKIAA small G protein signaling modulator 2                 | NM_197943.2     |
| 42 | Gene Tsr1    | AU040765,      | mK TSR1 20S rRNA accumulation                               | NM_177325.3     |
| 42 | Gene Snord91 | Snord91a,      | MBI small nucleolar RNA, C/D box 91A                        | NR_028562.1     |
| 42 | Gene Srr     | Srr,           | Srs serine racemase                                         | NM_013761.4, NM |
| 42 | Gene Smg6    | AI317223,      | Smg Smg-6 homolog, nonsense mediated mRNA decay factor      | NM_001002764.1  |
| 42 | Gene Hic1    | AA408311,      | Hic hypermethylated in cancer 1                             | NM_010430.2, NM |
| 42 | Gene Mir212  | Mirn212,       | mmu microRNA 212                                            | NR_029794.1     |
| 42 | Gene Mir132  | mmu-mir-132,   | microRNA 132                                                | NR_029546.1     |
| 42 | Gene Ovca2   | Ovca2,         | 903041 candidate tumor suppressor in ovarian cancer 2       | NM_027136.3     |
| 42 | Gene Dph1    | 4930488F09Ri   | DPH1 homolog (S. cerevisiae)                                | NM_144491.2     |
| 36 | Gene Rtn4rl1 | Ngrl2,         | Ngr3, Nr reticulon 4 receptor-like 1                        | NM_177708.5     |
| 24 | Gene Rpa1    | Rpa1,          | AA5895: replication protein A1                              | NM_026653.2, NM |
| 24 | Gene Smyd4   | G430029E23Ri   | SET and MYND domain containing 4                            | NM_001102611.1  |
| 28 | Gene Wdr81   | mFLJ00182,     | M WD repeat domain 81                                       | NM_138950.2     |
| 28 | Gene Mir22hg | 2210403K04Ri   | Mir22 host gene (non-protein coding)                        | NR_030711.1     |
| 28 | Gene Mir22   | Mirn22,        | Mir22 microRNA 22                                           | NR_029739.1     |
| 28 | Gene Tlcd2   | Tlcd2,         | 201030: TLC domain containing 2                             | NM_027249.2     |
| 20 | Gene Prpf8   | Prp8,          | D11Bwgl pre-mRNA processing factor 8                        | NM_138659.2     |
| 20 | Gene Rilp    | Rilp,          | RP23-384 Rab interacting lysosomal protein                  | NM_001029938.1  |
| 35 | Gene Scarf1  | SREC,          | mKIAA0: scavenger receptor class F, member 1                | NM_001004157.2  |
| 35 | Gene Slc43a2 | 7630402D21Ri   | solute carrier family 43, member 2                          | NM_173388.2, NM |
| 35 | Gene Pitpna  | vb,            | Pitpna, vibi phosphatidylinositol transfer protein, alpha   | NM_008850.1     |

|    |                   |                                                                    |                                |
|----|-------------------|--------------------------------------------------------------------|--------------------------------|
| 25 | Gene Myo1c        | MYO1E, NMI, I myosin IC                                            | NM_001080775.1                 |
| 25 | Gene Crk          | Crkol, Crk3, Crkv-crk sarcoma virus CT10 oncogene homolog (avian)  | NM_133656.4                    |
| 28 | Gene Ywhae        | Ywhae, AU019 tyrosine 3-monooxygenase/tryptophan 5-monooxygenase   | NM_009536.4                    |
| 25 | Gene Doc2b        | Doc2b                                                              | NM_007873.2                    |
| 26 | Gene Fam101b      | Fam101b, Refi family with sequence similarity 101, member B        | NM_029658.1                    |
| 26 | Gene Fam57a       | 5430420K21Ri family with sequence similarity 57, member A          | NM_027773.3                    |
| 26 | Gene Gemin4       | Gemin4, MGC36899 (nuclear organelle) associated protein 4          | NM_177367.3                    |
| 22 | Gene Dbil5        | ELP, Dbil5 diazepam binding inhibitor-like 5                       | NM_021294.2                    |
| 22 | Gene Glod4        | Glod4, C81254 glyoxalase domain containing 4                       | NM_026029.3                    |
| 36 | Gene Nxn          | I11Jus13, Nxn                                                      | NM_008750.5                    |
| 36 | Gene Timm22       | Tim22, Timm22 translocase of inner mitochondrial membrane 22       | NM_019818.4, NM_019818.1       |
| 20 | Gene Abr          | AU042359, Ab active BCR-related gene                               | NM_198018.1, NM_198018.1       |
| 34 | Gene Cpd          | Cpd, D830034I carboxypeptidase D                                   | NM_007754.2                    |
| 23 | Gene Blmh         | MGC36899, Br bleomycin hydrolase                                   | NM_178645.4                    |
| 25 | Gene Ssh2         | Ssh2, mSSH-2L slingshot homolog 2 (Drosophila)                     | NM_177710.4                    |
| 23 | Gene Coro6        | Coro6                                                              | NM_139128.1, NM_139128.1       |
| 30 | Gene Ankrd13      | B930093C12Ri ankyrin repeat domain 13b                             | NM_172945.2                    |
| 30 | Gene Git1         | Git1, p95Cat, CG protein-coupled receptor kinase-interactor 1      | NM_001004144.1                 |
| 18 | Gene Trp53i13     | Trp53i13, 241C transformation related protein 53 inducible protein | NM_001024920.1                 |
| 18 | Gene Abhd15       | Abhd15, 1300C abhydrolase domain containing 15                     | NM_026185.4                    |
| 18 | Gene LOC101055794 | uncharacterized LOC101055794                                       | XM_003945644.1, XM_003945644.1 |
| 30 | Gene Nufip2       | 1110001M19R nuclear fragile X mental retardation protein interact  | NM_001024205.2                 |
| 32 | Gene Sez6         | Sez6, BSRP-C, seizure related gene 6                               | NM_021286.3                    |
| 32 | Gene Phf12        | F630045O13, PHD finger protein 12                                  | NM_174852.3                    |
| 26 | Gene A030003K02   | A030003K02Ri RIKEN cDNA A030003K02 gene                            | XR_106683.1, XR_106683.1       |
| 26 | Gene Dhrs13       | 2610209N15Ri dehydrogenase/reductase (SDR family) member 13        | NM_183286.2                    |
| 26 | Gene Flot2        | AI573412, Esa, flotillin 2                                         | NM_008028.2, NM_008028.2       |
| 41 | Gene Fam222b      | Fam222b, BC0 family with sequence similarity 222, member B         | NM_145430.2                    |
| 41 | Gene Traf4        | Traf4, msp2, A TNF receptor associated factor 4                    | NM_009423.4                    |
| 41 | Gene Nek8         | Nek8, 463240I NIMA (never in mitosis gene a)-related expressed ki  | NM_080849.3                    |
| 34 | Gene Tlcd1        | Tlcd1, 061000I TLC domain containing 1                             | NM_026708.1                    |
| 34 | Gene Rpl23a       | MDA20, MGC36899 ribosomal protein L23A                             | NM_207523.2                    |
| 34 | Gene Snord42a     | Snord42a, MB1 small nucleolar RNA, C/D box 42A                     | NR_037682.1                    |
| 34 | Gene Snord4a      | Snord4a small nucleolar RNA, C/D box 4A                            | NR_030702.1                    |
| 34 | Gene Snord42b     | Snord42b, MB small nucleolar RNA, C/D box 42B                      | NR_037683.1                    |
| 34 | Gene Rab34        | Rah1, Narr, AI573412 RAB34, member of RAS oncogene family          | NM_033475.3, NM_033475.3       |
| 29 | Gene Proca1       | Proca1, 49334I protein interacting with cyclin A1                  | NM_001045516.2                 |
| 25 | Gene Supt6        | AI132449, 513 suppressor of Ty 6                                   | NM_009297.2                    |
| 26 | Gene Sdf2         | MGC107120, stromal cell derived factor 2                           | NM_009143.3                    |
| 26 | Gene 2610507E1    | KIAA0100, RIKEN cDNA 2610507B11 gene                               | NM_001002004.2                 |
| 18 | Gene Spag5        | Mastrin, AI874 sperm associated antigen 5                          | NM_017407.2                    |
| 18 | Gene Aldoc        | AU040929, Scr aldolase C, fructose-bisphosphate                    | NM_009657.3                    |
| 29 | Gene Pigs         | Gm689, BC058 phosphatidylinositol glycan anchor biosynthesis, cla  | NM_201406.1                    |
| 29 | Gene Unc119       | MRG4, HRG4, unc-119 homolog (C. elegans)                           | NM_011676.2                    |
| 25 | Gene Slc46a1      | 1110002C08Ri solute carrier family 46, member 1                    | NM_026740.2                    |
| 25 | Gene Sarm1        | A830091I15Ri sterile alpha and HEAT/Armadillo motif containing 1   | NM_001168521.1                 |
| 29 | Gene Vtn          | Vn, Vtn, AI256 vitronectin                                         | NM_011707.2                    |

|    |                |                                                                     |                  |
|----|----------------|---------------------------------------------------------------------|------------------|
| 29 | Gene Sebox     | Og9x, MGC106 SEBOX homeobox                                         | NM_008759.2      |
| 29 | Gene Tmem19    | R74819, AI848 transmembrane protein 199                             | NM_199199.3      |
| 29 | Gene Poldip2   | Poldip2, Pdip3 polymerase (DNA-directed), delta interacting protein | NM_026389.3      |
| 29 | Gene Tnfaip1   | Edp-1, Edp1, T tumor necrosis factor, alpha-induced protein 1 (end  | NM_009395.4, NM  |
| 26 | Gene Ksr1      | B-KSR1, D11B kinase suppressor of ras 1                             | NM_013571.2      |
| 25 | Gene Wsb1      | 2700038M07RWD repeat and SOCS box-containing 1                      | NM_019653.3, NM  |
| 22 | Gene Nf1       | Nf1, Nf-1, AWC neurofibromatosis 1                                  | NM_010897.2      |
| 27 | Gene Rab11fip4 | RAB11-FIP4, mRAB11 family interacting protein 4 (class II)          | NM_175543.3      |
| 18 | Gene 4930542   | 1700020F10Ri RIKEN cDNA 4930542H20 gene                             | NR_045898.2      |
| 34 | Gene Mir193    | Mirn193, Mir1 microRNA 193                                          | NR_029579.1      |
| 26 | Gene Crlf3     | Crlf2, BB16495 cytokine receptor-like factor 3                      | NM_018776.1      |
| 26 | Gene Atad5     | FRAG1, FLJ127 ATPase family, AAA domain containing 5                | NM_001029856.2   |
| 37 | Gene Rnf135    | 0610037N03Ri ring finger protein 135                                | NM_028019.3      |
| 37 | Gene Rhot1     | 2210403N23Ri ras homolog gene family, member T1                     | NM_021536.7, NM  |
| 23 | Gene Rhbdl3    | AI847581, Vrh rhomboid, veinlet-like 3 (Drosophila)                 | NM_139228.3      |
| 18 | Gene 5730455   | 5730455P16Rik                                                       | NM_027472.3      |
| 18 | Gene Zfp207    | Zep, 8430401C zinc finger protein 207                               | NM_001130169.1   |
| 30 | Gene Psm11     | C78232, Psm1 proteasome (prosome, macropain) 26S subunit, non       | NM_178616.3      |
| 30 | Gene Cdk5r1    | Cdk5r1, p35, D cyclin-dependent kinase 5, regulatory subunit 1 (p35 | NM_009871.2      |
| 30 | Gene Myo1d     | Myo1d, myosin myosin ID                                             | NM_177390.3      |
| 31 | Gene Gm1142    | OTTMUSG000 predicted gene 11423                                     | XR_106579.1, XR_ |
| 31 | Gene Lig3      | MGC78176, Lig3 ligase III, DNA, ATP-dependent                       | NM_010716.2      |
| 25 | Gene Fndc8     | Fndc8, 493046 fibronectin type III domain containing 8              | NM_030224.1      |
| 25 | Gene Nle1      | MGC25690, Nle notchless homolog 1 (Drosophila)                      | NM_145431.2      |
| 25 | Gene Unc45b    | Unc45, Cmya4 unc-45 homolog B (C. elegans)                          | NM_178680.4      |
| 17 | Gene AA46593   | AA465934 expressed sequence AA465934                                | NR_028363.1      |
| 17 | Gene AI45035   | AI450353 expressed sequence AI450353                                | NR_028364.1      |
| 17 | Gene Snord7    | Snord7 small nucleolar RNA, C/D box 7                               | NR_028362.1      |
| 17 | Gene Pex12     | Pex12, AI4519 peroxisomal biogenesis factor 12                      | NM_134025.3      |
| 17 | Gene Ap2b1     | Ap2b1, 13000 adaptor-related protein complex 2, beta 1 subunit      | NM_001035854.2   |
| 33 | Gene Mrm1      | A530065E19Ri mitochondrial rRNA methyltransferase 1 homolog (S      | NM_145433.1      |
| 33 | Gene Dhrs11    | Dhrs11, MGC1 dehydrogenase/reductase (SDR family) member 11         | NM_177564.5      |
| 33 | Gene 4930502   | 4930502E09Ri RIKEN cDNA 4930502E09 gene                             | NR_046281.1      |
| 43 | Gene Ggnbp2    | Ggnbp2, DIF-3, gametogenetin binding protein 2                      | NM_153144.2      |
| 43 | Gene Pigw      | Gwt1, Pigw, 26 phosphatidylinositol glycan anchor biosynthesis, cla | NM_027388.2, NM  |
| 43 | Gene Myo19     | Myo19, 11100 myosin XIX                                             | NM_025414.3      |
| 32 | Gene Znhit3    | MGC107312, T zinc finger, HIT type 3                                | NM_001005223.2   |
| 31 | Gene Appbp2    | AI465480, 130 amyloid beta precursor protein (cytoplasmic tail) bir | NM_025825.3      |
| 31 | Gene D630032   | D630032N06R RIKEN cDNA D630032N06 gene                              | NR_028329.1      |
| 21 | Gene Ppm1d     | Wip1, Ppm1d, protein phosphatase 1D magnesium-dependent, del        | NM_016910.3      |
| 25 | Gene Bcas3     | K20D4, 26100 breast carcinoma amplified sequence 3                  | NM_138681.4, NM  |
| 45 | Gene 2610027   | 2610027K06Ri RIKEN cDNA 2610027K06 gene                             | XR_106219.1      |
| 45 | Gene Tbx2      | Tbx2                                                                | NM_009324.2      |
| 20 | Gene Brip1     | OF, Fancj, 311(BRCA1 interacting protein C-terminal helicase 1      | NM_178309.2      |
| 23 | Gene Ints2     | 2810417D08Ri integrator complex subunit 2                           | NM_027421.2      |
| 25 | Gene Med13     | 1110067M05R mediator complex subunit 13                             | NM_001080931.1   |
| 28 | Gene Rps6kb1   | AI314060, p70 ribosomal protein S6 kinase, polypeptide 1            | NM_028259.4, NM  |

|    |               |                                                                    |                  |
|----|---------------|--------------------------------------------------------------------|------------------|
| 28 | Gene Tubd1    | Tubd, 493055C tubulin, delta 1                                     | NM_001199045.1   |
| 25 | Gene Cltc     | R74732, Cltc, $\beta$ clathrin, heavy polypeptide (Hc)             | NM_001003908.1   |
| 36 | Gene Ypel2    | 6430570G24, $\gamma$ yippee-like 2 (Drosophila)                    | NM_001005341.3   |
| 25 | Gene Smg8     | Smg8, 120001: smg-8 homolog, nonsense mediated mRNA decay fa       | NM_024262.1      |
| 25 | Gene Prr11    | B930067F20Ri proline rich 11                                       | NM_175563.5      |
| 31 | Gene Ska2     | 1110001A07Ri spindle and kinetochore associated complex subunit    | NM_025377.3      |
| 23 | Gene Mir301   | mmu-mir-301, microRNA 301                                          | NR_029652.1      |
| 31 | Gene Trim37   | TEF3, MUL, 28 tripartite motif-containing 37                       | NM_197987.1      |
| 23 | Gene Ppm1e    | mKIAA1072, B' protein phosphatase 1E (PP2C domain containing)      | NM_177167.4      |
| 32 | Gene Dynl12   | 6720463E02Ri dynein light chain LC8-type 2                         | NM_026556.4, NM  |
| 42 | Gene 2010015  | 2010015M23R RIKEN cDNA 2010015M23 gene                             | XR_168698.1, XR_ |
| 42 | Gene Srsf1    | Asf, AW49133: serine/arginine-rich splicing factor 1               | NM_173374.3, NM  |
| 21 | Gene Vezf1    | db1, AI848691 vascular endothelial zinc finger 1                   | NM_016686.3      |
| 21 | Gene 2210416  | 2210416O15Ri RIKEN cDNA 2210416O15 gene                            | NR_045499.1      |
| 25 | Gene Cuedc1   | AI841487, C33 CUE domain containing 1                              | NM_001172099.1   |
| 25 | Gene Mrps23   | Rpms23, Mrps mitochondrial ribosomal protein S23                   | NM_024174.5      |
| 26 | Gene Msi2     | MGC118040, $\beta$ musashi RNA-binding protein 2                   | NM_054043.3, NM  |
| 26 | Gene C030037  | C030037D09Ri RIKEN cDNA C030037D09 gene                            | NR_038058.1      |
| 31 | Gene Akap1    | Akap, C81186, A kinase (PRKA) anchor protein 1                     | NM_001042541.1   |
| 30 | Gene Coil     | Coil, p80, C79 $\epsilon$ coilin                                   | NM_016706.2      |
| 30 | Gene Trim25   | AA960166, AL( tripartite motif-containing 25                       | NM_009546.2      |
| 32 | Gene Dgke     | C87606, Dgke, diacylglycerol kinase, epsilon                       | NM_019505.3      |
| 32 | Gene A930013  | A930013B10Ri RIKEN cDNA A930013B10 gene                            | XR_035369.2, XR_ |
| 16 | Gene Nog      | Nog noggin                                                         | NM_008711.2      |
| 25 | Gene Stxbp4   | Stxbp4, Synip, syntaxin binding protein 4                          | NM_011505.2      |
| 25 | Gene Cox11    | Cox11, 20100C cytochrome c oxidase assembly protein 11             | NM_199008.2      |
| 25 | Gene Tom111   | 2310045L10Ri l target of myb1-like 1 (chicken)                     | NM_028011.2      |
| 41 | Gene Utp18    | 6230425C22Ri UTP18, small subunit (SSU) processome component       | NM_001013375.1   |
| 41 | Gene Mbtd1    | Mbtd1, AI194 $\epsilon$ mbt domain containing 1                    | NM_134012.3      |
| 23 | Gene Nme2     | NM23-H2, MG NME/NM23 nucleoside diphosphate kinase 2               | NM_001077529.1,  |
| 23 | Gene Nme1     | AL024257, NM NME/NM23 nucleoside diphosphate kinase 1              | NM_008704.2      |
| 32 | Gene Spag9    | 4831406C20Ri sperm associated antigen 9                            | NM_027569.2, NM  |
| 32 | Gene Tob1     | Tob1, Tob, Tro transducer of ErbB-2.1                              | NM_009427.2      |
| 17 | Gene Wfikkn2  | Gasp1, WFIKKI WAP, follistatin/kazal, immunoglobulin, kunitz and r | NM_181819.2      |
| 23 | Gene Luc7l3   | Luc7a, 330000 LUC7-like 3 (S. cerevisiae)                          | NM_026313.1      |
| 23 | Gene Ankrd40  | 5530600A18Ri ankyrin repeat domain 40                              | NM_027799.2, NM  |
| 19 | Gene Cacna1g  | mKIAA1123, C' calcium channel, voltage-dependent, T type, alpha 1  | NM_001112813.2   |
| 19 | Gene Spata20  | Spata20, Tisp7 spermatogenesis associated 20                       | NM_144827.4      |
| 17 | Gene Epn3     | Epn3, 2310022 $\epsilon$ epsin 3                                   | NM_027984.3      |
| 17 | Gene Mycbspaj | AW125474, AI MYCBP associated protein                              | NM_170671.2      |
| 38 | Gene Rsad1    | B430319G23, I radical S-adenosyl methionine domain containing 1    | NM_001013381.2   |
| 38 | Gene Acsf2    | MGC25878, Ac acyl-CoA synthetase family member 2                   | NM_153807.2      |
| 41 | Gene Lrrc59   | Lrrc59, C7866 $\epsilon$ leucine rich repeat containing 59         | NM_133807.1      |
| 19 | Gene Xylt2    | Xylt2, XT-II, XT xylosyltransferase II                             | NM_145828.3      |
| 47 | Gene Ppp1r9b  | Ppp1r9b, SPL, ' protein phosphatase 1, regulatory subunit 9B       | NM_172261.3      |
| 18 | Gene Samd14   | AI854782, Sarr sterile alpha motif domain containing 14            | NM_146025.2      |
| 25 | Gene Tac4     | Tac4, PPT-C, A' tachykinin 4                                       | NM_053093.1      |

|    |               |                                                                                 |                          |
|----|---------------|---------------------------------------------------------------------------------|--------------------------|
| 21 | Gene Nxph3    | Nxph3                                                                           | NM_130858.3              |
| 26 | Gene Ngfr     | Ngfr, Tnfrsf16, nerve growth factor receptor (TNFR superfamily, member 16)      | NM_033217.3              |
| 20 | Gene 1110035  | 1110035M17R RIKEN cDNA 1110035M17 gene                                          | NR_045780.1              |
| 20 | Gene B130006  | B130006D01R RIKEN cDNA B130006D01 gene                                          | NR_028263.1              |
| 27 | Gene Phospho1 | Phospho1, D111 phosphatase, orphan 1                                            | NM_153104.3              |
| 27 | Gene Abi3     | Abi3, 2210414 ABI gene family, member 3                                         | NM_025659.4, NM_025659.5 |
| 24 | Gene Ube2z    | Ube2z, AW049 ubiquitin-conjugating enzyme E2Z (putative)                        | NM_172300.3              |
| 24 | Gene Atp5g1   | Atp5g1                                                                          | NM_007506.6, NM_007506.7 |
| 27 | Gene Gm53     | Gm53 predicted gene 53                                                          | NR_037977.1              |
| 21 | Gene Hoxb8    | Hoxb8, Hox-2.4 homeobox B8                                                      | NM_010461.2              |
| 21 | Gene Hoxb7    | Hoxb7, AI3250 homeobox B7                                                       | NM_010460.2              |
| 24 | Gene Hoxb3    | Hox-2.7, Hoxb: homeobox B3                                                      | NM_001079869.1           |
| 24 | Gene Hoxb2    | Hoxbes2, Hox- homeobox B2                                                       | NM_134032.2              |
| 25 | Gene Nfe2l1   | AW212678, LC nuclear factor, erythroid derived 2,-like 1                        | NM_008686.3, NM_008686.4 |
| 21 | Gene Copz2    | Copz2, zeta2-C coatomer protein complex, subunit zeta 2                         | NM_019877.2              |
| 21 | Gene Mir152   | Mir152, mmu microRNA 152                                                        | NR_029562.1              |
| 30 | Gene Cdk5rap3 | 1810007E24Ri CDK5 regulatory subunit associated protein 3                       | NM_030248.1              |
| 30 | Gene Gm1152   | OTTMUSG000I predicted gene 11525                                                | XR_106402.1              |
| 25 | Gene Sp2      | mKIAA0048, 4'Sp2 transcription factor                                           | NM_030220.3, NM_030220.4 |
| 23 | Gene Sp6      | Epfm, AA59103 trans-acting transcription factor 6                               | NM_031183.2              |
| 23 | Gene Scrn2    | D11Moh48, Sc secernin 2                                                         | NM_146027.2              |
| 37 | Gene Tbkbp1   | 3110043L15Ril TBK1 binding protein 1                                            | NM_198100.2              |
| 37 | Gene Kpnb1    | Impnb, IPOB, karyopherin (importin) beta 1                                      | NM_008379.3              |
| 28 | Gene Npepps   | Psa, AAP-S, gol aminopeptidase puromycin sensitive                              | NM_008942.2              |
| 34 | Gene Socs7    | 2310063P06Ri suppressor of cytokine signaling 7                                 | NM_138657.3              |
| 18 | Gene Arhgap2  | A330041B18Ri Rho GTPase activating protein 23                                   | NM_021493.2              |
| 20 | Gene 2410003  | 2410003L11Ril RIKEN cDNA 2410003L11 gene                                        | NR_045496.1              |
| 20 | Gene E130012  | AI413509, E13 RIKEN cDNA E130012A19 gene                                        | NM_175332.3              |
| 24 | Gene Mllt6    | AI315037, Mllt myeloid/lymphoid or mixed-lineage leukemia (trithorax) protein 6 | NM_139311.2              |
| 24 | Gene Cisd3    | Cisd3, Mel13, ICDGSH iron sulfur domain 3                                       | NM_001085500.2           |
| 26 | Gene Pcgf2    | Zfp144, Pcgf2, polycomb group ring finger 2                                     | NM_009545.2, NM_009545.3 |
| 26 | Gene Psmb3    | AL033320, Psn proteasome (prosome, macropain) subunit, beta type 3              | NM_011971.4              |
| 31 | Gene Pip4k2b  | Pip4k2b, c11, P phosphatidylinositol-5-phosphate 4-kinase, type II, class B     | NM_054051.1              |
| 31 | Gene Cwc25    | 1300013D05Ri CWC25 spliceosome-associated protein homolog (S. pombe)            | NM_026186.4              |
| 39 | Gene 1700001  | 1700001P01Rik                                                                   | NM_028156.2              |
| 39 | Gene Rpl23    | Rpl23, 281000 ribosomal protein L23                                             | NM_022891.3              |
| 39 | Gene Snora21  | Snora21, MBI-: small nucleolar RNA, H/ACA box 21                                | NR_028078.1              |
| 27 | Gene Lasp1    | SH3P6, AA408I LIM and SH3 protein 1                                             | NM_010688.4              |
| 23 | Gene Plxdc1   | Tem7, MGC13I plexin domain containing 1                                         | NM_028199.3, NM_028199.4 |
| 23 | Gene Arl5c    | BC065791, MCADP-ribosylation factor-like 5C                                     | NM_207231.1              |
| 38 | Gene Cacnb1   | Cacnb1, Cchlb: calcium channel, voltage-dependent, beta 1 subunit               | NM_031173.3, NM_031173.4 |
| 38 | Gene Rpl19    | Rpl19                                                                           | NM_009078.2, NM_009078.3 |
| 38 | Gene Stac2    | 24b2/STAC2, NSH3 and cysteine rich domain 2                                     | NM_146028.4              |
| 31 | Gene Fbxl20   | KIAA4147, Fbl: F-box and leucine-rich repeat protein 20                         | NM_028149.1              |
| 31 | Gene Med1     | Pparbp, AI480' mediator complex subunit 1                                       | NM_001080118.1           |
| 23 | Gene Cdk12    | 1810022J16Ril cyclin-dependent kinase 12                                        | NM_001109626.1           |
| 17 | Gene Neurod2  | Ndrf, bHLHa1, neurogenic differentiation 2                                      | NM_010895.3              |

|    |              |                                                                    |                 |
|----|--------------|--------------------------------------------------------------------|-----------------|
| 26 | Gene Erbb2   | Erbb-2, Erbb2, v-erb-b2 erythroblastic leukemia viral oncogene hor | NM_001003817.1  |
| 23 | Gene Ormdl3  | Ormdl3, 2810C ORM1-like 3 (S. cerevisiae)                          | NM_025661.4     |
| 35 | Gene Gsdma   | Gsdma, H312E gasdermin A                                           | NM_021347.4     |
| 35 | Gene Psm3    | Psm3, AntP9: proteasome (prosome, macropain) 26S subunit, non      | NM_009439.1     |
| 31 | Gene Thra    | Nr1a1, 643052 thyroid hormone receptor alpha                       | NM_178060.3     |
| 21 | Gene Nr1d1   | R75201, Nr1d1 nuclear receptor subfamily 1, group D, member 1      | NM_145434.3     |
| 38 | Gene Msl1    | Msl1, AA6820 male-specific lethal 1 homolog (Drosophila)           | NM_028722.2     |
| 38 | Gene Gm1235  | Gm12359, OT1 predicted gene 12359                                  | NR_033551.1     |
| 24 | Gene Casc3   | Mln51, Casc3, cancer susceptibility candidate 3                    | NM_138660.2     |
| 28 | Gene Rara    | Rara, RAR, Nr1 retinoic acid receptor, alpha                       | NM_009024.2, NM |
| 18 | Gene Gjd3    | cx30.2, Gja11, gap junction protein, delta 3                       | NM_178596.2     |
| 40 | Gene Igfbp4  | Deb2, AI87574 insulin-like growth factor binding protein 4         | NM_010517.3     |
| 25 | Gene Smarce1 | 5830412H02Ri SWI/SNF related, matrix associated, actin dependen    | NM_020618.4     |
| 25 | Gene Krt22   | MGC100296, K keratin 22                                            | NM_172946.2     |
| 34 | Gene Leprel4 | AI413214, 111 leprecan-like 4                                      | NM_176830.2     |
| 34 | Gene Fkbp10  | Fkbp10, FKBP- FK506 binding protein 10                             | NM_001163481.1  |
| 34 | Gene Nt5c3b  | Nt5c3b, Nt5c3 5'-nucleotidase, cytosolic IIIB                      | NM_026561.4, NM |
| 25 | Gene Khlh10  | 4921517C11Rik, Khlh10                                              | NM_025727.3     |
| 38 | Gene Khlh11  | BC011167, Khlh11, RP23-392I3.12                                    | NM_172565.2     |
| 38 | Gene Acly    | Acly, AW5386 ATP citrate lyase                                     | NM_134037.3, NM |
| 24 | Gene Dnajc7  | 2010004G07Ri DnaJ (Hsp40) homolog, subfamily C, member 7           | NM_019795.4     |
| 24 | Gene Nkiras2 | Nkiras2, 2410C NFKB inhibitor interacting Ras-like protein 2       | NM_028024.2     |
| 24 | Gene Zfp385c | Znf385c, A930 zinc finger protein 385C                             | NM_177790.4     |
| 23 | Gene Dhx58   | Dhx58, LPG2, E DEXH (Asp-Glu-X-His) box polypeptide 58             | NM_030150.2     |
| 23 | Gene Kat2a   | AW212720, Gc K(lysine) acetyltransferase 2A                        | NM_001038010.2  |
| 23 | Gene Hspb9   | Hspb9, 17000C heat shock protein, alpha-crystallin-related, B9     | NM_029307.1     |
| 23 | Gene Rab5c   | AI326010, Rab RAB5C, member RAS oncogene family                    | NM_024456.4     |
| 24 | Gene Stat5b  | Stat5b signal transducer and activator of transcription 5B         | NM_011489.3, NM |
| 24 | Gene Stat5a  | AA959963, ST signal transducer and activator of transcription 5A   | NM_011488.3, NM |
| 33 | Gene Ptrf    | AW546441, 23 polymerase I and transcript release factor            | NM_008986.2     |
| 38 | Gene Atp6v0a | ATP6a1, Vpp-1 ATPase, H+ transporting, lysosomal V0 subunit A1     | NM_001243049.1  |
| 38 | Gene Naglu   | Naglu alpha-N-acetylglucosaminidase (Sanfilippo disease II         | NM_013792.2     |
| 38 | Gene Hsd17b1 | E2DH, Hsd17b hydroxysteroid (17-beta) dehydrogenase 1              | NM_010475.1     |
| 22 | Gene Coasy   | Coasy, Ukr1, 1. Coenzyme A synthase                                | NM_027896.4     |
| 22 | Gene Mlx     | bHLHd13, Tcf1 MAX-like protein X                                   | NM_011550.3, NM |
| 21 | Gene Psmc3ip | Tbpip, HOP2, F proteasome (prosome, macropain) 26S subunit, ATP    | NM_008949.3     |
| 25 | Gene Fam134c | AI551748, 493 family with sequence similarity 134, member C        | NM_026501.2, NM |
| 25 | Gene Tubg1   | AI451582, MG tubulin, gamma 1                                      | NM_134024.2     |
| 33 | Gene Tubg2   | Tubgl, AI50477 tubulin, gamma 2                                    | NM_134028.2     |
| 33 | Gene Plekhh3 | Plekhh3, BC02 pleckstrin homology domain containing, family H (w   | NM_146030.2     |
| 33 | Gene Ccr10   | MGC151420, C chemokine (C-C motif) receptor 10                     | NM_007721.4     |
| 33 | Gene Cntnap1 | Nrxn4, Cntnap contactin associated protein-like 1                  | NM_016782.2     |
| 27 | Gene Ezh1    | mKIAA0388, A enhancer of zeste homolog 1 (Drosophila)              | NM_007970.2     |
| 27 | Gene Ramp2   | Ramp2 receptor (calcitonin) activity modifying protein 2           | NM_019444.2     |
| 27 | Gene Vps25   | 1110020N13Ri vacuolar protein sorting 25 (yeast)                   | NM_026776.3     |
| 22 | Gene Wnk4    | Prkwnk4, 201C WNK lysine deficient protein kinase 4                | NM_175638.3     |
| 39 | Gene Psme3   | Psme3, REGga proteaseome (prosome, macropain) 28 subunit, 3        | NM_011192.3     |



|    |                   |               |                                                                |                  |
|----|-------------------|---------------|----------------------------------------------------------------|------------------|
| 39 | Gene Aoc2         | Aoc2, RAO     | amine oxidase, copper containing 2 (retina-specific)           | NM_178932.1      |
| 35 | Gene Aarsd1       | AA589600,     | Ala alanyl-tRNA synthetase domain containing 1                 | NM_144829.1      |
| 35 | Gene Ptges3l      | 1110069E20Ri  | prostaglandin E synthase 3 (cytosolic)-like                    | NM_026865.2      |
| 65 | Gene Rundc1       | AW125546,     | D $\epsilon$ RUN domain containing 1                           | NM_172566.4      |
| 65 | Gene Rpl27        | Rpl27,        | MGC10 ribosomal protein L27                                    | NM_011289.3      |
| 65 | Gene Ifi35        | Ifi35,        | AW9860: interferon-induced protein 35                          | NM_027320.4      |
| 31 | Gene Vat1         | Vat1,         | VAT-1 vesicle amine transport protein 1 homolog (T califor     | NM_012037.2      |
| 31 | Gene Rnd2         | Rohn,         | Rnd2, Arho family GTPase 2                                     | NM_009708.1      |
| 23 | Gene Rnu2-10      | nmf291,       | Rnu2, U2 small nuclear RNA 10                                  | NR_004414.1      |
| 23 | Gene Arl4d        | AW456149,     | M ADP-ribosylation factor-like 4D                              | NM_025404.3      |
| 23 | Gene Dusp3        | VHR,          | 2210015: dual specificity phosphatase 3 (vaccinia virus phosph | NM_028207.3      |
| 23 | Gene 1700006      | 1700006E09Rik |                                                                | NM_029287.1      |
| 22 | Gene Lsm12        | 1110059P07,   | L LSM12 homolog (S. cerevisiae)                                | NM_172947.3      |
| 22 | Gene G6pc3        | UGRP,         | AU0454: glucose 6 phosphatase, catalytic, 3                    | NM_175935.3      |
| 22 | Gene Hdac5        | Hdac5,        | AI4265 histone deacetylase 5                                   | NM_001077696.1   |
| 21 | Gene BC03086      | MGC31269,     | M cDNA sequence BC030867                                       | NM_153544.3      |
| 25 | Gene Tmub2        | Tmub2,        | 20100 transmembrane and ubiquitin-like domain containin        | NM_028076.2      |
| 25 | Gene Atxn7l3      | E030022H21Ri  | ataxin 7-like 3                                                | NM_001098837.1   |
| 39 | Gene Ubtf         | UBF,          | Ubtf, A93 upstream binding transcription factor, RNA polymer   | NM_001044383.1   |
| 24 | Gene Rundc3a      | Rap2ip,       | Rpip8, RUN domain containing 3A                                | NM_001252347.1   |
| 24 | Gene Slc25a39     | 3010027G13Ri  | solute carrier family 25, member 39                            | NM_026542.3      |
| 33 | Gene Grn          | epithelin,    | Grn granulin                                                   | NM_008175.4      |
| 33 | Gene Fam171a      | Fam171a2      | family with sequence similarity 171, member A2                 | NM_199200.2      |
| 18 | Gene Itga2b       | Gpllb,        | CD41, $\alpha$ integrin alpha 2b                               | NM_010575.2      |
| 23 | Gene Gpatch8      | 5430405G24Ri  | G patch domain containing 8                                    | NM_001159492.1   |
| 31 | Gene Fzd2         | AW456835,     | M frizzled homolog 2 (Drosophila)                              | NM_020510.2      |
| 21 | Gene Ccdc43       | 2610001E01Ri  | coiled-coil domain containing 43                               | NM_025918.3      |
| 35 | Gene Adam11       | Adam11,       | Mdc, a disintegrin and metallopeptidase domain 11              | NM_009613.2, NM  |
| 21 | Gene Eftud2       | Snrp116,      | 116k elongation factor Tu GTP binding domain containing        | NM_011431.3, NM  |
| 21 | Gene Ccdc103      | Ccdc103,      | 1700 coiled-coil domain containing 103                         | NM_028492.2      |
| 21 | Gene Fam187a      | MGC151146,    | 4 family with sequence similarity 187, member A                | NM_025766.2      |
| 21 | Gene Gfap         | AI836096,     | Gfaj glial fibrillary acidic protein                           | NM_010277.3, NM  |
| 29 | Gene Kif18b       | Kif18b,       | 30000: kinesin family member 18B                               | NM_197959.2      |
| 25 | Gene Dcald        | 3010024O21Ri  | dephospho-CoA kinase domain containing                         | NM_026551.3      |
| 25 | Gene LOC100862190 |               | uncharacterized LOC100862190                                   | XR_141069.1      |
| 22 | Gene Plcd3        | Plcd3,        | 261020: phospholipase C, delta 3                               | NM_152813.3      |
| 30 | Gene Acbd4        | Acbd4,        | 201001 acyl-Coenzyme A binding domain containing 4             | NM_025988.2      |
| 30 | Gene Hexim1       | CLP-1,        | HIS1, Cl hexamethylene bis-acetamide inducible 1               | NM_138753.2      |
| 18 | Gene Hexim2       | 4933402L21Ri  | hexamethylene bis-acetamide inducible 2                        | NM_027658.2, NM  |
| 17 | Gene Fmn1         | 8030453N10Ri  | formin-like 1                                                  | NM_001077698.1,  |
| 22 | Gene Rprml        | Rprml,        | AW049 reprimol-like                                            | NM_001033212.2   |
| 26 | Gene Gosr2        | C76855,       | memt golgi SNAP receptor complex member 2                      | NM_019650.3      |
| 26 | Gene C130046      | C130046K22Ri  | RIKEN cDNA C130046K22 gene                                     | XR_106356.2, XR_ |
| 19 | Gene Wnt3         | Wnt3,         | Wnt-3,   wingless-related MMTV integration site 3              | NM_009521.2      |
| 39 | Gene Arf2         | Arf2          | ADP-ribosylation factor 2                                      | NM_007477.4      |
| 16 | Gene Mapt         | AW045860,     | M microtubule-associated protein tau                           | NM_001038609.1   |
| 35 | Gene Kansl1       | Kansl1,       | Kiaa1267, 1700081L11Rik, 9430041J06Rik, MGC90742, mKI          | NM_001081045.1   |

|    |              |                                                                    |                  |
|----|--------------|--------------------------------------------------------------------|------------------|
| 25 | Gene Efcab3  | Efcab3, 49215: EF-hand calcium binding domain 3                    | NM_001081046.1   |
| 25 | Gene Mettl2  | PSENIP1, D11E methyltransferase like 2                             | NM_172567.3      |
| 28 | Gene 1700052 | AI840954, 170 RIKEN cDNA 1700052K11 gene                           | NR_027956.1      |
| 28 | Gene Tlk2    | Tlk, Tlk2, 4933 tousled-like kinase 2 (Arabidopsis)                | NM_001112705.1   |
| 24 | Gene Mrc2    | Endo180, mKI/ mannose receptor, C type 2                           | NM_008626.3      |
| 16 | Gene March1  | OTTMUSG000I membrane-associated ring finger (C3HC4) 10             | NM_172568.2, NM  |
| 19 | Gene Tanc2   | 5730590C14Ri tetratricopeptide repeat, ankyrin repeat and coiled-  | NM_181071.3      |
| 25 | Gene Cyb561  | Cyb561                                                             | NM_007805.4      |
| 33 | Gene Kcnh6   | Kcnh6, MGC12 potassium voltage-gated channel, subfamily H (eag-    | NM_001037712.1   |
| 33 | Gene Dcaf7   | 1700012F10Ri DDB1 and CUL4 associated factor 7                     | NM_027946.3      |
| 17 | Gene Taco1   | Taco1, Ccdc44 translational activator of mitochondrially encoded c | NM_027346.1      |
| 39 | Gene Map3k3  | Mekk3, KIAA4( mitogen-activated protein kinase kinase kinase 3     | NM_011947.3      |
| 27 | Gene Ccdc47  | asp4, RP23-81i coiled-coil domain containing 47                    | NM_026009.2      |
| 27 | Gene Ddx42   | Ddx42, RHELP, DEAD (Asp-Glu-Ala-Asp) box polypeptide 42            | NM_028074.4      |
| 25 | Gene Psmc5   | mSUG1, Psmc( protease (prosome, macropain) 26S subunit, ATPase     | NM_008950.1      |
| 25 | Gene Smarcd2 | AW322457, Ba SWI/SNF related, matrix associated, actin dependen    | NM_031878.2, NM  |
| 25 | Gene Tcam1   | 4930570F09Ri testicular cell adhesion molecule 1                   | NM_029467.3      |
| 36 | Gene Tex2    | AI553404, Def: testis expressed gene 2                             | NM_198292.3      |
| 41 | Gene Polg2   | Polg2 polymerase (DNA directed), gamma 2, accessory sub            | NM_015810.2, NR  |
| 41 | Gene Ddx5    | p68, MGC118( DEAD (Asp-Glu-Ala-Asp) box polypeptide 5              | NM_007840.3      |
| 41 | Gene Mir3064 | Mir3064, mmu microRNA 3064                                         | NR_037224.1      |
| 41 | Gene Cep95   | Ccdc45, F6300 centrosomal protein 95                               | NM_177088.3, NM  |
| 18 | Gene Smurf2  | AI649275, AI5: SMAD specific E3 ubiquitin protein ligase 2         | NM_025481.2      |
| 52 | Gene Kpna2   | IPOA1, 241004 karyopherin (importin) alpha 2                       | NM_010655.3      |
| 30 | Gene Nol11   | AU019874, No nucleolar protein 11                                  | NM_133702.2, NM  |
| 23 | Gene Pitpnc1 | 1110020B03Ri phosphatidylinositol transfer protein, cytoplasmic 1  | NM_145823.2      |
| 23 | Gene Psmd12  | P55, 1500002F proteasome (prosome, macropain) 26S subunit, non     | NM_025894.2      |
| 22 | Gene A830035 | A830035A12Ri RIKEN cDNA A830035A12 gene                            | XM_920516.3, XM  |
| 22 | Gene Helz    | KIAA0054, AI8: helicase with zinc finger domain                    | NM_198298.1      |
| 19 | Gene Cacng4  | Cacng4, AW49 calcium channel, voltage-dependent, gamma subuni      | NM_019431.2      |
| 26 | Gene Prkca   | Prkca, AI87514 protein kinase C, alpha                             | NM_011101.3      |
| 15 | Gene Cep112  | Ccdc46, AV207 centrosomal protein 112                              | NM_029606.3, NM  |
| 25 | Gene Axin2   | Axi1, Axil, Axin axin2                                             | NM_015732.4      |
| 33 | Gene 1700096 | 1700096J18Ri RIKEN cDNA 1700096J18 gene                            | NR_027883.1      |
| 33 | Gene Gm1169  | OTTMUSG000I predicted gene 11696                                   | NR_038097.1      |
| 33 | Gene Gna13   | Galpha13, AUC guanine nucleotide binding protein, alpha 13         | NM_010303.3      |
| 32 | Gene Slc16a6 | MCT 7, AW74( solute carrier family 16 (monocarboxylic acid transp  | NM_001029842.1   |
| 32 | Gene Arsg    | AI846872, MG arylsulfatase G                                       | NM_028710.3, NM  |
| 36 | Gene Wipi1   | 4930533H01Ri WD repeat domain, phosphoinositide interacting 1      | NM_145940.2      |
| 28 | Gene Prkar1a | 1300018C22Ri protein kinase, cAMP dependent regulatory, type I, i  | NM_021880.2      |
| 41 | Gene Sox9    | KIAA4243, AV( SRY-box containing gene 9                            | NM_011448.4      |
| 41 | Gene Gm1168  | OTTMUSG000I predicted gene 11681                                   | XR_141077.1, XR_ |
| 43 | Gene Cog1    | KIAA1381, Cog component of oligomeric golgi complex 1              | NM_013581.3      |
| 30 | Gene Fam104  | D11Wsu99e, F family with sequence similarity 104, member A         | NM_138598.5      |
| 30 | Gene D11Wsu  | MGC57008, M DNA segment, Chr 11, Wayne State University 47, e      | NM_177777.5      |
| 30 | Gene Cdc42ep | Cdc42ep4, Bor CDC42 effector protein (Rho GTPase binding) 4        | NM_020006.2, NM  |
| 23 | Gene Sdk2    | Sdk-2, mKIAA1 sidekick homolog 2 (chicken)                         | NM_172800.2      |

|    |                   |                                                                               |                 |
|----|-------------------|-------------------------------------------------------------------------------|-----------------|
| 40 | Gene Rpl38        | 0610025G13Ri ribosomal protein L38                                            | NM_023372.2, NM |
| 40 | Gene Ttyh2        | 1110001A03Ri tweety homolog 2 (Drosophila)                                    | NM_053273.2     |
| 26 | Gene Gprc5c       | Raig3, 111002iG protein-coupled receptor, family C, group 5, mem              | NM_001110337.1  |
| 25 | Gene Tmem10       | Tmem104, mF transmembrane protein 104                                         | NM_001033393.2  |
| 25 | Gene Grin2c       | NR2C, Grin2c, glutamate receptor, ionotropic, NMDA2C (epsilon 3)              | NM_010350.2     |
| 18 | Gene Hid1         | C630004H02Ri HID1 domain containing                                           | NM_175454.2     |
| 25 | Gene Cdr2l        | Cdr2l, D03006i cerebellar degeneration-related protein 2-like                 | NM_001080929.1  |
| 25 | Gene Ict1         | 1110002E03Ri immature colon carcinoma transcript 1                            | NM_026729.1     |
| 23 | Gene Atp5h        | Atp5h, 061000 ATP synthase, H <sup>+</sup> transporting, mitochondrial FO cor | NM_027862.1     |
| 23 | Gene Kctd2        | Kctd2, 231001 potassium channel tetramerisation domain containi               | NM_183285.3     |
| 23 | Gene Slc16a5      | A130015N09R solute carrier family 16 (monocarboxylic acid transp              | NM_001080934.1  |
| 31 | Gene Armc7        | MGC27721, Ar armadillo repeat containing 7                                    | NM_177778.4     |
| 31 | Gene Nt5c         | Nt5c, Umph-2, 5',3'-nucleotidase, cytosolic                                   | NM_015807.1     |
| 33 | Gene Hn1          | Hn1 hematological and neurological expressed sequence                         | NM_008258.1     |
| 33 | Gene Sumo2        | Sumo2, Smt3b SMT3 suppressor of mif two 3 homolog 2 (yeast)                   | NM_133354.2     |
| 31 | Gene Gga3         | C230037M19Rgolgi associated, gamma adaptin ear containing, ARI                | NM_001252067.1, |
| 31 | Gene Mrps7        | Rpms7, MRP-S mitchondrial ribosomal protein S7                                | NM_025305.2     |
| 31 | Gene Mif4gd       | 1110014L05Ril MIF4G domain containing                                         | NM_027162.4, NM |
| 31 | Gene Slc25a15     | DNC, TPC, Slc2 solute carrier family 25 (mitochondrial thiamine pyr           | NM_001252384.1  |
| 28 | Gene 2310067      | mKIAA0195, 2: RIKEN cDNA 2310067B10 gene                                      | NM_028014.3     |
| 28 | Gene Caskin2      | Caskin2, mKIAA CASK-interacting protein 2                                     | NM_080643.2     |
| 28 | Gene Tsen54       | 0610034P02Ri tRNA splicing endonuclease 54 homolog (S. cerevisia              | NM_029557.1     |
| 28 | Gene Llgl2        | Llgl2, Llglh2, M lethal giant larvae homolog 2 (Drosophila)                   | NM_145438.2, NM |
| 25 | Gene LOC101055975 | uncharacterized LOC101055975                                                  | XM_003945881.1, |
| 20 | Gene Itgb4        | AA407042, C2: integrin beta 4                                                 | NM_001005608.2  |
| 20 | Gene Galk1        | AA409894, GA galactokinase 1                                                  | NM_016905.2     |
| 43 | Gene H3f3b        | H3f3b, H3.3B, H3 histone, family 3B                                           | NM_008211.3     |
| 43 | Gene Unk          | Zc3h5, Unk, m unkempt homolog (Drosophila)                                    | NM_172569.3     |
| 47 | Gene Trim47       | 2210023F24Ril tripartite motif-containing 47                                  | NM_001205081.1  |
| 36 | Gene Trim65       | Trim65, 47324 tripartite motif-containing 65                                  | NM_178802.4     |
| 36 | Gene Mrpl38       | MGC8310, Mrj mitochondrial ribosomal protein L38                              | NM_024177.3     |
| 19 | Gene Fbf1         | Fbf1, mKIAA18 Fas (TNFRSF6) binding factor 1                                  | NM_172571.3     |
| 20 | Gene Evpl         | Evpl                                                                          | NM_025276.3     |
| 22 | Gene Srp68        | MGC38208, 2ε signal recognition particle 68                                   | NM_146032.3     |
| 22 | Gene Galr2        | MGC151357, C galanin receptor 2                                               | NM_010254.4     |
| 22 | Gene Foxj1        | HFH-4, FKHL-1 forkhead box J1                                                 | NM_008240.3     |
| 23 | Gene Rnf157       | mKIAA1917, 2i ring finger protein 157                                         | NM_027258.1     |
| 44 | Gene Ubald2       | Fam100b, D03 UBA-like domain containing 2                                     | NM_176902.3     |
| 44 | Gene Qrich2       | Gm66, Qrich2 glutamine rich 2                                                 | NM_001033267.2  |
| 28 | Gene Prpsap1      | 5730409F23Ril phosphoribosyl pyrophosphate synthetase-associat                | NM_026364.1     |
| 29 | Gene Sphk1        | SK1, Spk1, 111 sphingosine kinase 1                                           | NM_001172472.1, |
| 38 | Gene Ube2o        | 9630022H21, I ubiquitin-conjugating enzyme E2O                                | NM_173755.3     |
| 17 | Gene Rhbdf2       | 4732465i17Rik rhomboid 5 homolog 2 (Drosophila)                               | NM_172572.3, NM |
| 42 | Gene Cygb         | Staap, Cygb, 3: cytoglobin                                                    | NM_030206.4     |
| 42 | Gene Gm1174       | Prcd, OTTMUS predicted gene 11744                                             | NM_001163318.1  |
| 26 | Gene Mxra7        | E130302J09Rik matrix-remodelling associated 7                                 | NM_026280.3     |
| 58 | Gene Jmjd6        | D11Ert195e, jumonji domain containing 6                                       | NM_033398.2     |

|    |               |                                                                      |                  |
|----|---------------|----------------------------------------------------------------------|------------------|
| 58 | Gene Mettl23  | 4933424L15Ril methyltransferase like 23                              | NM_028865.3      |
| 58 | Gene Srsf2    | Pr264, Sfrs2, S serine/arginine-rich splicing factor 2               | NM_011358.2      |
| 56 | Gene Mfsd11   | Mfsd11, MGC1 major facilitator superfamily domain containing 11      | NM_178620.3      |
| 36 | Gene Sec14l1  | Naa-35, Sec14 SEC14-like 1 (S. cerevisiae)                           | NM_028777.3, NM  |
| 27 | Gene Sept9    | MSF1, PNU TL4 septin 9                                               | NM_017380.2, NM  |
| 30 | Gene Tnrc6c   | 9930033H14Ri trinucleotide repeat containing 6C                      | NM_198022.2      |
| 21 | Gene Tmc6     | Tmc6, EVER1, I transmembrane channel-like gene family 6              | NM_181321.3, NM  |
| 21 | Gene Tmc8     | Ever2, mFLJ00.transmembrane channel-like gene family 8               | NM_001195088.1,  |
| 30 | Gene 6030468  | 6030468B19Rik                                                        | NM_029964.1      |
| 30 | Gene Syngn2   | Clast2, cellugyl synaptogyrin 2                                      | NM_009304.2      |
| 30 | Gene Tk1      | Tk1a, Tk1b, Tk thymidine kinase 1                                    | NM_009387.2      |
| 25 | Gene Afmid    | KFA, Kf, Ammc arylformamidase                                        | NM_027827.3      |
| 25 | Gene Birc5    | Api4, Birc5, AA baculoviral IAP repeat-containing 5                  | NM_009689.2, NM  |
| 43 | Gene Tmem23   | Tmem235, OTTMUSG00000007589, Gm12581, Cldn27                         | NM_001085535.1   |
| 43 | Gene Tha1     | GLY1, 1300017 threonine aldolase 1                                   | NM_027919.4      |
| 43 | Gene Gm1172   | OTTMUSG000I predicted gene 11725                                     | XR_106617.1, XR_ |
| 36 | Gene Socs3    | Socs3, Cish3, S suppressor of cytokine signaling 3                   | NM_007707.3      |
| 17 | Gene Pgs1     | SAF, Pgs1, 493 phosphatidylglycerophosphate synthase 1               | NM_133757.2      |
| 32 | Gene Timp2    | Timp2, D11Bw tissue inhibitor of metalloproteinase 2                 | NM_011594.3      |
| 28 | Gene Cant1    | Apy1h, Cant1, calcium activated nucleotidase 1                       | NM_001025617.2   |
| 28 | Gene C1qtnf1  | 1600017K21Ri C1q and tumor necrosis factor related protein 1         | NM_019959.3, NM  |
| 32 | Gene Cbx2     | MOD2, Cbx2, $\zeta$ chromobox 2                                      | NM_007623.2      |
| 18 | Gene Cbx8     | Pc3, Cbx8 chromobox 8                                                | NM_013926.1      |
| 25 | Gene Cbx4     | MPc2, PC2, Cb chromobox 4                                            | NM_007625.2      |
| 24 | Gene Tbc1d16  | Tbc1d16, BC02 TBC1 domain family, member 16                          | NM_172443.3      |
| 24 | Gene Ccdc40   | MGC109697, E coiled-coil domain containing 40                        | NM_175430.4      |
| 28 | Gene Eif4a3   | eIF4A-III, 2400 eukaryotic translation initiation factor 4A3         | NM_138669.1      |
| 31 | Gene Card14   | Bimp2, Card14 caspase recruitment domain family, member 14           | NM_130886.3      |
| 31 | Gene Sgsh     | Sgsh, 4632406 N-sulfoglucosamine sulfohydrolase (sulfamidase)        | NM_018822.3      |
| 31 | Gene Slc26a11 | Slc26a11, F63C solute carrier family 26, member 11                   | NM_178743.3      |
| 29 | Gene Mir1932  | Mir1932, mmu microRNA 1932                                           | NR_035453.1      |
| 29 | Gene Rnf213   | Rnf213, D11Er ring finger protein 213                                | XM_001476651.3,  |
| 26 | Gene Endov    | A730011L01Rik, Endov                                                 | NM_177394.3, NM  |
| 27 | Gene Nptx1    | Np1, Nptx1, D: neuronal pentraxin 1                                  | NM_008730.2      |
| 27 | Gene Gm1176   | Gm11762, OTI predicted gene 11762                                    | NR_045099.1      |
| 25 | Gene Rptor    | mKIAA1303, 4: regulatory associated protein of MTOR, complex 1       | NM_028898.2      |
| 59 | Gene Chmp6    | 2400004G01Rik, Chmp6                                                 | NM_001085498.2   |
| 33 | Gene Baiap2   | IRSp53, Baiap2 brain-specific angiogenesis inhibitor 1-associated pr | NM_130862.4, NM  |
| 17 | Gene Aatk     | AATYK, aatyk1 apoptosis-associated tyrosine kinase                   | NM_001198785.1   |
| 17 | Gene Mir338   | Mir338, mmu- microRNA 338                                            | NR_029767.1      |
| 17 | Gene Mir3065  | mmu-mir-3065 microRNA 3065                                           | NR_037225.1      |
| 34 | Gene Gm9734   | Gm9734, ENSM predicted gene 9734                                     | XR_035387.1, XR_ |
| 34 | Gene 281041C  | 2810410L24Ril RIKEN cDNA 2810410L24 gene                             | NR_030682.1      |
| 34 | Gene Bahcc1   | Bahcc1, BC060 BAH domain and coiled-coil containing 1                | NM_198423.3      |
| 34 | Gene Gm1177   | Gm11772, OTI predicted gene 11772                                    | XR_106376.1, XR_ |
| 60 | Gene Actg1    | MGC28612, A actin, gamma, cytoplasmic 1                              | NM_009609.2      |
| 60 | Gene 0610009  | 0610009L18Ril RIKEN cDNA 0610009L18 gene                             | NR_038126.1      |

|    |               |                                                                      |                  |
|----|---------------|----------------------------------------------------------------------|------------------|
| 27 | Gene Fscn2    | Fscn2, MGC131 fascin homolog 2, actin-bundling protein, retinal (Str | NM_172802.4      |
| 27 | Gene 2310003  | 2310003H01Rik, Faap100                                               | NM_027980.2      |
| 27 | Gene Nploc4   | AK129375, Npl nuclear protein localization 4 homolog (S. cerevisiae  | NM_199469.2, NM  |
| 25 | Gene Tspan10  | Ocsp, Tspan10 tetraspanin 10                                         | NM_145363.2      |
| 30 | Gene Pde6g    | Pde6g, Pdeg, p phosphodiesterase 6G, cGMP-specific, rod, gamma       | NM_012065.2      |
| 30 | Gene Oxd1     | 1810049H13Ri oxidoreductase like domain containing 1                 | NM_025560.2      |
| 30 | Gene Ccdc137  | Ccdc137, RP23 coiled-coil domain containing 137                      | NM_152807.3      |
| 30 | Gene Arl16    | Arl16, 260000!ADP-ribosylation factor-like 16                        | NM_197995.2      |
| 32 | Gene Hgs      | Hgs, Hrs, Hgr, ;HGF-regulated tyrosine kinase substrate              | NM_001159328.1   |
| 32 | Gene Mrpl12   | Rpml12, Mrpl1 mitochondrial ribosomal protein L12                    | NM_027204.2      |
| 32 | Gene Gm1675   | Gm16755 predicted gene, 16755                                        | XR_141085.1, XR_ |
| 32 | Gene Slc25a10 | Slc25a10, Dic solute carrier family 25 (mitochondrial carrier, dicar | NM_013770.2      |
| 29 | Gene Gcgr     | Gcgr, GR glucagon receptor                                           | NM_008101.2      |
| 29 | Gene Fam195b  | Fam195b family with sequence similarity 195, member B                | NM_001033231.2   |
| 29 | Gene Ppp1r27  | Ppp1r27, 1110 protein phosphatase 1, regulatory subunit 27           | NM_026814.3      |
| 32 | Gene P4hb     | PDI, Thbp, P4h prolyl 4-hydroxylase, beta polypeptide                | NM_011032.2      |
| 32 | Gene Arhgdia  | Arhgdia, RhoD Rho GDP dissociation inhibitor (GDI) alpha             | NM_133796.7      |
| 22 | Gene Alyref   | Thoc4, Refbp1 Aly/REF export factor                                  | NM_011568.1      |
| 22 | Gene Anapc11  | 111001119Rik anaphase promoting complex subunit 11                   | NM_001038230.2   |
| 22 | Gene Npb      | Npb                                                                  | NM_153288.3      |
| 44 | Gene Pcyt2    | Pcyt2, ET, 111(phosphate cytidyltransferase 2, ethanolamine          | NM_024229.2      |
| 44 | Gene Sirt7    | MGC31235, Sii sirtuin 7 (silent mating type information regulation 2 | NM_153056.2      |
| 44 | Gene Mafg     | AA545192, Mav-maf musculoaponeurotic fibrosarcoma oncogene           | NM_010756.3      |
| 24 | Gene Pycr1    | Pycr1, MGC111 pyrroline-5-carboxylate reductase 1                    | NM_144795.3      |
| 27 | Gene Aspscr1  | ASPS, 1190006 alveolar soft part sarcoma chromosome region, can      | NM_026877.2, NM  |
| 27 | Gene Stra13   | Stra13                                                               | NM_016665.2      |
| 27 | Gene Lrrc45   | BC023296, Lrrr leucine rich repeat containing 45                     | NM_153545.2      |
| 27 | Gene Rac3     | Rac3, Rac1B RAS-related C3 botulinum substrate 3                     | NM_133223.4      |
| 25 | Gene Dcxr     | 0610038K04Ri dicarbonyl L-xylulose reductase                         | NM_026428.2      |
| 25 | Gene Cbr2     | MLCR, Cbr2 carbonyl reductase 2                                      | NM_007621.2      |
| 33 | Gene Rfng     | Rfng, MGC901 RFNG O-fucosylpeptide 3-beta-N-acetylglucosaminy        | NM_009053.2      |
| 33 | Gene Gps1     | Sgn1, Csn1, M1G protein pathway suppressor 1                         | NM_001177874.1   |
| 33 | Gene Dus1l    | 1110032N12Ri dihydrouridine synthase 1-like (S. cerevisiae)          | NM_026824.4      |
| 51 | Gene Fasn     | FAS, Fasn, A63 fatty acid synthase                                   | NM_007988.3      |
| 51 | Gene Ccdc57   | Ccdc57, 49334 coiled-coil domain containing 57                       | NM_027745.1      |
| 18 | Gene Slc16a3  | Mct3, Slc16a3, solute carrier family 16 (monocarboxylic acid transp  | NM_030696.3, NM  |
| 93 | Gene Csnk1d   | Csnk1d, D930C casein kinase 1, delta                                 | NM_027874.2, NM  |
| 17 | Gene Tex19.1  | Tex19a, 24100 testis expressed gene 19.1                             | NM_028602.2      |
| 41 | Gene Ogfod3   | Ogfod3, 1110C 2-oxoglutarate and iron-dependent oxygenase dom:       | NM_025402.2      |
| 41 | Gene Hexdc    | Hexdc, MGC78 hexosaminidase (glycosyl hydrolase family 20, cataly    | NM_001001333.2   |
| 35 | Gene Wdr45b   | Wdr45l, AA408 WD repeat domain 45B                                   | NM_025793.3      |
| 35 | Gene Rab40b   | rar, Rab40b, S1 Rab40b, member RAS oncogene family                   | NM_139147.3      |
| 28 | Gene Fn3k     | Fn3k, 2310074 fructosamine 3 kinase                                  | NM_022014.4, NM  |
| 28 | Gene Tbcd     | Tbcd, A030005 tubulin-specific chaperone d                           | NM_029878.3      |
| 24 | Gene Metrnl   | 9430048M07R meteorin, glial cell differentiation regulator-like      | NM_144797.3      |
| 25 | Gene Rab10    | Rab10, AW107 RAB10, member RAS oncogene family                       | NM_016676.5      |
| 37 | Gene 1110002  | 1110002L01Ril RIKEN cDNA 1110002L01 gene                             | NR_030694.1      |

|    |               |                                                                    |                 |
|----|---------------|--------------------------------------------------------------------|-----------------|
| 37 | Gene Asxl2    | MGC176101, Additional sex combs like 2 (Drosophila)                | NM_001270988.1  |
| 21 | Gene Dtnb     | Dtnb, dystrobrevin, beta                                           | NM_007886.2, NM |
| 26 | Gene Dnmt3a   | AU015806, Wt DNA methyltransferase 3A                              | NM_153743.3, NM |
| 17 | Gene Adcy3    | mKIAA0511, A adenylate cyclase 3                                   | NM_138305.3, NM |
| 27 | Gene Ncoa1    | Ncoa1, bHLHe nuclear receptor coactivator 1                        | NM_010881.2     |
| 15 | Gene Fkbp1b   | AW494148, 12FK506 binding protein 1b                               | NM_016863.3     |
| 15 | Gene BC068281 | BC068281, A4: cDNA sequence BC068281                               | NM_001170858.1, |
| 30 | Gene Ubxn2a   | Ubx4, MGC7: UBX domain protein 2A                                  | NM_145441.3     |
| 30 | Gene Atad2b   | Atad2b, D530C ATPase family, AAA domain containing 2B              | NM_001099628.1  |
| 17 | Gene Kihl29   | A230106N14Rik, mKIAA1921, Gm68, Kbtbd9, Kihl29                     | NM_001164493.1  |
| 21 | Gene Pum2     | Pumm2, 5730: pumilio 2 (Drosophila)                                | NM_030723.2, NM |
| 27 | Gene Sdc1     | Synd, AA4081: syndecan 1                                           | NM_011519.2     |
| 34 | Gene Laptm4a  | mKIAA0108, L: lysosomal-associated protein transmembrane 4A        | NM_008640.2     |
| 16 | Gene 1700022  | 1700022H16Ri RIKEN cDNA 1700022H16 gene                            | NR_045488.1     |
| 16 | Gene Osr1     | Osr, Osr1, Odd odd-skipped related 1 (Drosophila)                  | NM_011859.3     |
| 35 | Gene Nt5c1b   | Nt5c1b, AIRP, 5'-nucleotidase, cytosolic IB                        | NM_027588.3     |
| 35 | Gene Rdh14    | PAN2, Rdh14, retinol dehydrogenase 14 (all-trans and 9-cis)        | NM_023697.2     |
| 24 | Gene Gen1     | Gen1, 583048: Gen homolog 1, endonuclease (Drosophila)             | NM_177331.4     |
| 24 | Gene Smc6     | KIAA4103, AW structural maintenance of chromosomes 6               | NM_025695.4     |
| 19 | Gene Rad51ap2 | Rad51ap2, EG: RAD51 associated protein 2                           | NM_001111118.1  |
| 47 | Gene Mycn     | Nmyc1, Nmyc-v-myc myelocytomatosis viral related oncogene, neu     | NM_008709.3     |
| 23 | Gene Ddx1     | AA409185, Dd: DEAD (Asp-Glu-Ala-Asp) box polypeptide 1             | NM_134040.1     |
| 24 | Gene Trib2    | TRB-2, AW319 tribbles homolog 2 (Drosophila)                       | NM_144551.5     |
| 32 | Gene Ntsr2    | Ntsr2, NTRL, N neurotensin receptor 2                              | NM_008747.2     |
| 32 | Gene Greb1    | AU023194, 91: gene regulated by estrogen in breast cancer protein  | NM_001252071.1  |
| 32 | Gene E2f6     | AI462434, EM: E2F transcription factor 6                           | NM_033270.2, NR |
| 27 | Gene Rock2    | mKIAA0619, R: Rho-associated coiled-coil containing protein kinase | NM_009072.2     |
| 31 | Gene Pdia6    | C77895, Txndc protein disulfide isomerase associated 6             | NM_027959.3, XM |
| 39 | Gene Odc1     | Odc1, MGC10: ornithine decarboxylase, structural 1                 | NM_013614.2     |
| 33 | Gene Hpcal1   | Vsnl3, Hpcal1, hippocalcin-like 1                                  | NM_016677.4     |
| 28 | Gene Cpsf3    | MGC118660, C cleavage and polyadenylation specificity factor 3     | NM_018813.3     |
| 28 | Gene lah1     | 1500019E20Ri isoamyl acetate-hydrolyzing esterase 1 homolog (S.    | NM_026347.3     |
| 28 | Gene Adam17   | CD156b, Adam a disintegrin and metallopeptidase domain 17          | NM_009615.5     |
| 39 | Gene Klf11    | Tieg2, Tieg2b, Kruppel-like factor 11                              | NM_178357.3     |
| 38 | Gene Rrm2     | Rrm2, AA4072 ribonucleotide reductase M2                           | NM_009104.2     |
| 30 | Gene Kidins22 | AI316525, Kidi kinase D-interacting substrate 220                  | NM_001081378.1  |
| 25 | Gene Rnf144a  | Rnf144a, Ubce ring finger protein 144A                             | NM_001081977.1  |
| 26 | Gene Cmpk2    | Cmpk2, Tyki, 1 cytidine monophosphate (UMP-CMP) kinase 2, mito     | NM_020557.4     |
| 34 | Gene Sox11    | 1110038H03Ri SRY-box containing gene 11                            | NM_009234.6     |
| 57 | Gene Rps7     | Rps7A, Rps7, S ribosomal protein S7                                | NM_011300.3     |
| 27 | Gene Rnaseh1  | Rnaseh1, ribonuclease H1                                           | NM_011275.2     |
| 28 | Gene Pxdn     | Pxdn, VPO1, mperoxidasin homolog (Drosophila)                      | NM_181395.2     |
| 25 | Gene Lamb1    | Lamb1-1, D13: laminin B1                                           | NM_008482.2     |
| 26 | Gene Dld      | AI746344, AI3: dihydrolipoamide dehydrogenase                      | NM_007861.4     |
| 15 | Gene Slc26a4  | Slc26a4, Pds solute carrier family 26, member 4                    | NM_011867.3     |
| 16 | Gene Hbp1     | 1700058O05Ri high mobility group box transcription factor 1        | NM_153198.2, NM |
| 25 | Gene Prkar2b  | AW061005, Pk protein kinase, cAMP dependent regulatory, type II    | NM_011158.3     |

|    |               |                                                                           |                  |
|----|---------------|---------------------------------------------------------------------------|------------------|
| 28 | Gene Ccdc71l  | 2010109K11Ri coiled-coil domain containing 71 like                        | NM_001162903.1   |
| 24 | Gene 4933406  | 4933406C10Ri RIKEN cDNA 4933406C10 gene                                   | NR_044986.1      |
| 24 | Gene Sypl     | Pphn, Sypl, Alé synaptophysin-like protein                                | NM_198710.3, NM  |
| 26 | Gene Twistnb  | 2410173G11, ¿TWIST neighbor                                               | NM_172253.2      |
| 22 | Gene Twist1   | bHLHa38, pdt, twist basic helix-loop-helix transcription factor 1         | NM_011658.2      |
| 22 | Gene Snx13    | Rgs-px1, mKIA, sorting nexin 13                                           | NM_001014973.2   |
| 22 | Gene Gm1093   | Gm10933, ENS predicted gene 10933                                         | XR_141116.1, XR_ |
| 25 | Gene Ahr      | Ahr, bHLHe76, aryl-hydrocarbon receptor                                   | NM_013464.4      |
| 30 | Gene Bzw2     | HSPC028, MGC basic leucine zipper and W2 domains 2                        | NM_025840.3      |
| 30 | Gene Ankmy2   | AI035571, MG ankyrin repeat and MYND domain containing 2                  | NM_146033.3      |
| 26 | Gene Gm1955   | Gm19558 predicted gene, 19558                                             | XR_168488.1, XR_ |
| 26 | Gene Ispd     | 4930579E17Ri isoprenoid synthase domain containing                        | NM_178629.5      |
| 17 | Gene Etv1     | ER81, Etsrp81, ets variant gene 1                                         | NM_001163154.1   |
| 27 | Gene Arl4a    | Arl4, Arl4a, Al¿ADP-ribosylation factor-like 4A                           | NM_001039515.1   |
| 35 | Gene Zfp277   | NIRF4, 241001 zinc finger protein 277                                     | NM_172575.3, NM  |
| 35 | Gene Dock4    | 6330411N01Ri dedicator of cytokinesis 4                                   | NM_172803.2      |
| 27 | Gene Pnpla8   | MGC150064, ¿patatin-like phospholipase domain containing 8                | NM_026164.2      |
| 26 | Gene Stxbp6   | MGC30948, BC syntaxin binding protein 6 (amisyn)                          | NM_144552.3      |
| 20 | Gene Prkd1    | Prkcm, Pkcm, I protein kinase D1                                          | NM_008858.3      |
| 24 | Gene Strn3    | Gs2na, Strn3, ¿striatin, calmodulin binding protein 3                     | NM_001172098.1   |
| 24 | Gene Ap4s1    | AI314282, Ap4 adaptor-related protein complex AP-4, sigma 1               | NM_021710.3      |
| 30 | Gene Hectd1   | opm, A630086 HECT domain containing 1                                     | NM_144788.2      |
| 30 | Gene Gm5785   | EG544864, Gr predicted gene 5785                                          | XM_974939.1      |
| 25 | Gene Heatr5a  | Heatr5a, C230 HEAT repeat containing 5A                                   | NM_177171.4      |
| 28 | Gene Eapp     | 1810011O16Ri E2F-associated phosphoprotein                                | NM_025456.3      |
| 24 | Gene Snx6     | AU018928, Sn¿sorting nexin 6                                              | NM_026998.3      |
| 20 | Gene Baz1a    | Gtl5, BC06512, bromodomain adjacent to zinc finger domain 1A              | NM_013815.2      |
| 25 | Gene Psma6    | IOTA, Psma6 proteasome (prosome, macropain) subunit, alpha type 6         | NM_011968.3      |
| 35 | Gene Nfkbia   | Nfkbia, AI4620 nuclear factor of kappa light polypeptide gene enhancer 1B | NM_010907.2      |
| 24 | Gene Insm2    | Mlt1, Insm2 insulinoma-associated 2                                       | NM_020287.2      |
| 24 | Gene Ralgapa1 | mKIAA0884, 4¿Ral GTPase activating protein, alpha subunit 1               | NM_019994.4, NM  |
| 22 | Gene E030019  | AI413669, E03 RIKEN cDNA E030019B13 gene                                  | NR_045082.1      |
| 22 | Gene Nkx2-1   | T/EBP, Titf1, A¿NK2 homeobox 1                                            | NM_009385.3, NM  |
| 24 | Gene Nkx2-9   | Nkx-2.9, tinma NK2 transcription factor related, locus 9 (Drosophila)     | NM_008701.2      |
| 18 | Gene Pax9     | Pax-9, Pax9 paired box gene 9                                             | NM_011041.2      |
| 30 | Gene Prps13   | MGC117905, F phosphoribosyl pyrophosphate synthetase 1-like 3             | NM_001037746.3   |
| 30 | Gene Mipol1   | 6030439O22Ri mirror-image polydactyly gene 1 homolog (human)              | NM_001164370.1   |
| 35 | Gene Sec23a   | Sec23a, Sec23¿SEC23A (S. cerevisiae)                                      | NM_009147.2      |
| 35 | Gene Gemin2   | Sip1, Gemin2, gem (nuclear organelle) associated protein 2                | NM_025656.4      |
| 28 | Gene Trappc6l | Trappc6b, 583 trafficking protein particle complex 6B                     | NM_030057.2      |
| 28 | Gene Pnn      | D12Ert512e, ¿pinin                                                        | NM_008891.2      |
| 23 | Gene Ctage5   | Ctage5, D12Bv CTAGE family, member 5                                      | NM_146034.3, NM  |
| 31 | Gene Fbxo33   | AI642135, Fbx¿F-box protein 33                                            | NM_001033156.4   |
| 37 | Gene Prpf39   | Srsc1, FLJ1112, PRP39 pre-mRNA processing factor 39 homolog (yeast)       | NM_177806.3      |
| 37 | Gene Fkbp3    | Fkbp3, 25kDa, FK506 binding protein 3                                     | NM_013902.4      |
| 37 | Gene Fancm    | C730036B14Ri Fanconi anemia, complementation group M                      | NM_178912.3      |
| 23 | Gene Mis18bp  | KIAA1903, Mis MIS18 binding protein 1                                     | NM_172578.2      |

|    |                   |                                                                           |                  |
|----|-------------------|---------------------------------------------------------------------------|------------------|
| 29 | Gene Rps29        | Rps29                                                                     | NM_009093.2      |
| 29 | Gene Rn7s1        | Rn7s1, Rn7s-1 7S RNA 1                                                    | NR_052007.1      |
| 37 | Gene Lrr1         | 2410005L11Ri leucine rich repeat protein 1                                | NM_001081406.1   |
| 37 | Gene Rpl36al      | 2410038A03Ri ribosomal protein L36A-like                                  | NM_025589.4      |
| 57 | Gene Mgat2        | MGC37173, Gl mannoside acetylglucosaminyltransferase 2                    | NM_146035.2      |
| 57 | Gene Dnaaf2       | 1110034A24Ri dynein, axonemal assembly factor 2                           | NM_027269.3      |
| 57 | Gene 9330151      | 9330151L19Ri RIKEN cDNA 9330151L19 gene                                   | NR_033222.1      |
| 57 | Gene Pole2        | Pole2 polymerase (DNA directed), epsilon 2 (p59 subunit)                  | NM_011133.2      |
| 18 | Gene Klhdc1       | Klhdc1, MGC1 kelch domain containing 1                                    | NM_178253.5      |
| 34 | Gene Klhdc2       | HCLP-1, 23100 kelch domain containing 2                                   | NM_027117.3      |
| 35 | Gene Arf6         | AW496366, AI ADP-ribosylation factor 6                                    | NM_007481.3      |
| 30 | Gene Mettl21      | Gm71, Mettl2: methyltransferase like 21D                                  | NM_001033236.2   |
| 30 | Gene Sos2         | Sos2 son of sevenless homolog 2 (Drosophila)                              | NM_001135559.1   |
| 23 | Gene L2hgdh       | MGC28775, L2 L-2-hydroxyglutarate dehydrogenase                           | NM_145443.2      |
| 29 | Gene Map4k5       | KHS, GCKR, 44: mitogen-activated protein kinase kinase kinase kinase      | NM_201519.2      |
| 29 | Gene Atl1         | SPG3, 493043: atlastin GTPase 1                                           | NM_178628.5      |
| 21 | Gene Sav1         | Wwp4, Sav1, V salvador homolog 1 (Drosophila)                             | NM_022028.2      |
| 21 | Gene Nin          | mKIAA1565, 3: ninein                                                      | NM_001081453.1   |
| 21 | Gene Pygl         | Pygl                                                                      | NM_133198.2      |
| 21 | Gene F730035      | F730035M05R RIKEN cDNA F730035M05 gene                                    | NR_045174.1      |
| 26 | Gene Trim9        | C030048G07Ri tripartite motif-containing 9                                | NM_053167.3, NM  |
| 34 | Gene Frmd6        | Frmd6, 49304: FERM domain containing 6                                    | NM_028127.3      |
| 42 | Gene 3110056      | 4921536K06Ri RIKEN cDNA 3110056K07 gene                                   | NR_045055.1, NR_ |
| 42 | Gene Arid4a       | MmRBBP1, A6 AT rich interactive domain 4A (RBP1-like)                     | NM_001081195.1   |
| 31 | Gene Timm9        | 2810011L15Ri translocase of inner mitochondrial membrane 9                | NM_013896.3, NM  |
| 31 | Gene 2700049      | 2700049A03Ri RIKEN cDNA 2700049A03 gene                                   | NM_001163378.1   |
| 23 | Gene Dact1        | DAPPER1, DAP dapper homolog 1, antagonist of beta-catenin (xeno           | NM_001190466.1   |
| 23 | Gene LOC101055739 | uncharacterized LOC101055739                                              | XM_003945490.1   |
| 26 | Gene Daam1        | E130308H01, 1 dishevelled associated activator of morphogenesis 1         | NM_026102.2, NM  |
| 31 | Gene Gpr135       | PAFR, Gpr135 G protein-coupled receptor 135                               | NM_181752.1      |
| 43 | Gene L3hypdh      | 2810055F11Ri L-3-hydroxyproline dehydratase (trans-)                      | NM_026038.2      |
| 43 | Gene Jkamp        | Jamp, Jkamp, JNK1/MAPK8-associated membrane protein                       | NM_024205.2, NM  |
| 33 | Gene Ppm1a        | 2310003C21Ri protein phosphatase 1A, magnesium dependent, alpha           | NM_008910.3      |
| 23 | Gene Trmt5        | 2610027O18Ri TRM5 tRNA methyltransferase 5                                | NM_029580.3      |
| 23 | Gene Slc38a6      | EG625098, Slc: solute carrier family 38, member 6                         | NM_001037717.3   |
| 22 | Gene Tmem30       | 9130011B11Ri transmembrane protein 30B                                    | NM_178715.3      |
| 22 | Gene 2210039      | 2210039B01Ri RIKEN cDNA 2210039B01 gene                                   | NR_044985.1      |
| 22 | Gene Prkch        | Pkch, Prkch protein kinase C, eta                                         | NM_008856.3      |
| 28 | Gene Hif1a        | HIF1alpha, MC hypoxia inducible factor 1, alpha subunit                   | NM_010431.2      |
| 28 | Gene Gm2023       | Gm20235 predicted gene, 20235                                             | XR_141136.1, XR_ |
| 22 | Gene Gm5068       | EG277089, Grr predicted gene 5068                                         | XM_204772.4, XM  |
| 22 | Gene Snapc1       | 2700033G17Ri small nuclear RNA activating complex, polypeptide 1          | NM_178392.4      |
| 24 | Gene Ppp2r5e      | Ppp2r5e, AI44: protein phosphatase 2, regulatory subunit B (B56), epsilon | NM_012024.2      |
| 26 | Gene Sgpp1        | Spph1, SPP, Sg sphingosine-1-phosphate phosphatase 1                      | NM_030750.3      |
| 29 | Gene Syne2        | Nesp2g, 68204 spectrin repeat containing, nuclear envelope 2              | NM_001005510.2   |
| 31 | Gene Zbtb25       | AI842128, Kup zinc finger and BTB domain containing 25                    | NM_001172104.1   |
| 31 | Gene Zbtb1        | AI256369, C43 zinc finger and BTB domain containing 1                     | NM_178744.2      |



|    |                   |               |                                                                    |                  |
|----|-------------------|---------------|--------------------------------------------------------------------|------------------|
| 25 | Gene 4930426      | 4930426I24Rik | RIKEN cDNA 4930426I24 gene                                         | XR_106723.1, XR_ |
| 25 | Gene Hspa2        | Hspa2,        | Hsp70- heat shock protein 2                                        | NM_001002012.1   |
| 18 | Gene Mir5135      | Mir5135,      | mmu microRNA 5135                                                  | NR_039597.1      |
| 18 | Gene Plekhg3      | MGC40768,     | Pl <sub>1</sub> pleckstrin homology domain containing, family G (w | NM_153804.4      |
| 23 | Gene Sptb         | D330027P03Ri  | spectrin beta, erythrocytic                                        | NM_013675.3      |
| 19 | Gene Max          | bHLHd8,       | bHLH Max protein                                                   | NM_008558.2, NM  |
| 26 | Gene Fut8         | Fut8          |                                                                    | NM_001252614.1,  |
| 36 | Gene Gphn         | C230040D23,   | Igephyrin                                                          | NM_172952.3, NM  |
| 18 | Gene Mpp5         | AI255216,     | AI6 <sub>1</sub> membrane protein, palmitoylated 5 (MAGUK p55 su   | NM_019579.3      |
| 24 | Gene Tmem22       | Tmem229b,     | 9 <sub>8</sub> transmembrane protein 229B                          | NM_178745.4, NM  |
| 29 | Gene Plekhh1      | AV308913,     | Ple pleckstrin homology domain containing, family H (w             | NM_181073.3      |
| 29 | Gene Pigh         | MGC102258,    | F phosphatidylinositol glycan anchor biosynthesis, cla             | NM_029988.2      |
| 31 | Gene Vti1b        | MVti1b,       | SNARE, GES30, Vti1-rp1, AU015348, Vti1b                            | NM_016800.3      |
| 31 | Gene Rdh11        | AI428145,     | CGI <sub>1</sub> retinol dehydrogenase 11                          | NM_021557.5      |
| 50 | Gene Zfp361       | Brf1,         | AW7424 <sub>1</sub> :zinc finger protein 36, C3H type-like 1       | NM_007564.5      |
| 50 | Gene 2310015      | 2310015A10Ri  | RIKEN cDNA 2310015A10 gene                                         | NR_033514.1      |
| 30 | Gene Actn1        | Actn1a,       | Actn1, actinin, alpha 1                                            | NM_134156.2      |
| 26 | Gene Dcaf5        | Wdr22,        | AI325C DDB1 and CUL4 associated factor 5                           | NM_177267.4      |
| 31 | Gene Exd2         | 4930539P14Ri  | exonuclease 3'-5' domain containing 2                              | NM_133798.3      |
| 23 | Gene 2310002      | 2310002D06Ri  | RIKEN cDNA 2310002D06 gene                                         | NR_045490.1      |
| 23 | Gene Galnt16      | 5730405L21Ri  | UDP-N-acetyl-alpha-D-galactosamine:polypeptide N                   | NM_001081421.1   |
| 30 | Gene Erh          | MGC130271,    | F enhancer of rudimentary homolog (Drosophila)                     | NM_007951.3      |
| 30 | Gene Slc39a9      | 2610511I23Ri  | solute carrier family 39 (zinc transporter), member 9              | NM_026244.2      |
| 18 | Gene 0610009      | 0610009B14Ri  | RIKEN cDNA 0610009B14 gene                                         | NR_037995.1      |
| 18 | Gene Plekhd1      | 3830431G21Ri  | pleckstrin homology domain containing, family D (w                 | NM_001177503.1   |
| 19 | Gene Ccdc177      | Ccdc177,      | Gm1 coiled-coil domain containing 177                              | NM_001008423.2   |
| 35 | Gene 4933426      | mKIAA0247,    | 4 <sub>1</sub> RIKEN cDNA 4933426M11 gene                          | NM_001242419.1,  |
| 29 | Gene Gm2033       | Gm20337       | predicted gene, 20337                                              | NR_045057.1      |
| 29 | Gene Srsf5        | Srsf5,        | Sfrs5, M serine/arginine-rich splicing factor 5                    | NM_001079694.1   |
| 29 | Gene Slc10a1      | Ntcp,         | Slc10a1 solute carrier family 10 (sodium/bile acid cotranspor      | NM_001177561.1   |
| 23 | Gene Smoc1        | AI848508,     | 260 SPARC related modular calcium binding 1                        | NM_022316.2, NM  |
| 29 | Gene Pcnx         | 3526401J03Ri  | pecanex homolog (Drosophila)                                       | NM_018814.3      |
| 24 | Gene Sipa11       | 4931426N11Ri  | signal-induced proliferation-associated 1 like 1                   | NM_172579.3, NM  |
| 27 | Gene Dpf3         | Dpf3,         | 6530402D4, zinc and double PHD fingers, family 3                   | NM_001267625.1,  |
| 22 | Gene Zfyve1       | G630053K23,   | I zinc finger, FYVE domain containing 1                            | NM_183154.3      |
| 27 | Gene Rbm25        | AL023075,     | AU RNA binding motif protein 25                                    | NM_027349.3      |
| 27 | Gene Psen1        | PS-1,         | Psen1, S <sub>1</sub> presenilin 1                                 | NM_008943.2      |
| 47 | Gene LOC101055670 |               | HEAT repeat-containing protein 4-like                              | XM_003945496.1   |
| 47 | Gene LOC101055814 |               | uncharacterized LOC101055814                                       | XM_003945491.1   |
| 47 | Gene 2410016      | MAPJD,        | NO66, RIKEN cDNA 2410016O06 gene                                   | NM_023633.3      |
| 32 | Gene Acot2        | AA571646,     | Ac <sub>1</sub> acyl-CoA thioesterase 2                            | NM_134188.3      |
| 16 | Gene Acot6        | Acot6,        | A33005 acyl-CoA thioesterase 6                                     | NM_172580.1      |
| 28 | Gene Elmsan1      | Elmsan1,      | 9430 ELM2 and Myb/SANT-like domain containing 1                    | NM_001163501.1,  |
| 28 | Gene Gm1932       | Gm19327       | predicted gene, 19327                                              | XR_141138.1      |
| 37 | Gene Fam161       | I9330169D17,  | 9 family with sequence similarity 161, member B                    | NM_172581.2      |
| 37 | Gene Coq6         | Coq6,         | 5930427 coenzyme Q6 homolog (yeast)                                | NM_172582.3      |
| 21 | Gene Entpd5       | mNTPase,      | NTP ectonucleoside triphosphate diphosphohydrolase 5               | NM_007647.2, NM  |

|    |                   |                                                                      |                 |
|----|-------------------|----------------------------------------------------------------------|-----------------|
| 21 | Gene Ccdc176      | 2900006K08Ri coiled-coil domain containing 176                       | NM_028377.3     |
| 21 | Gene Rnf113a      | MGC144613, 2 ring finger protein 113A2                               | NM_025525.2     |
| 20 | Gene Syndig1l     | DSPC1, Gm261synapse differentiation inducing 1 like                  | NM_001033334.2  |
| 23 | Gene Ltbp2        | MGC144212, L latent transforming growth factor beta binding prot     | NM_013589.3     |
| 23 | Gene D030025P21   | D030025P21Ri RIKEN cDNA D030025P21 gene                              | NR_028577.1     |
| 28 | Gene Ylpm1        | A930013E17Ri YLP motif containing 1                                  | NM_178363.3     |
| 33 | Gene Prox2        | 1700058C01Ri prospero homeobox 2                                     | NM_175198.4     |
| 33 | Gene Dlst         | DLTS, 4930529 dihydrolipoamide S-succinyltransferase (E2 compon      | NM_030225.4     |
| 21 | Gene Nek9         | C130021H08Ri NIMA (never in mitosis gene a)-related expressed ki     | NM_145138.2     |
| 21 | Gene Tmed10       | p24delta1, Tm transmembrane emp24-like trafficking protein 10 (y     | NM_026775.4     |
| 17 | Gene Fos          | cFos, D12Rfj1, FBJ osteosarcoma oncogene                             | NM_010234.2     |
| 21 | Gene LOC101055678 | uncharacterized LOC101055678                                         | XM_003945497.1  |
| 21 | Gene Jdp2         | Jundp2, TIF, JdJun dimerization protein 2                            | NM_030887.2, NM |
| 18 | Gene Mfsd7c       | MGC19050, Fl major facilitator superfamily domain containing 7C      | NM_145447.2     |
| 26 | Gene Vash1        | G630009D10R vasohibin 1                                              | NM_177354.4     |
| 48 | Gene Irf2bpl      | Irf2bpl, Eap1, ε interferon regulatory factor 2 binding protein-like | NM_145836.2     |
| 33 | Gene Pomt2        | A830009D15Ri protein-O-mannosyltransferase 2                         | NM_153415.3     |
| 33 | Gene Gstz1        | Gstz1, MAAI glutathione transferase zeta 1 (maleylacetoacetate i     | NM_001252555.1  |
| 29 | Gene Tmed8        | Mem1, AI4472 transmembrane emp24 domain containing 8                 | NM_001033475.3  |
| 29 | Gene Samd15       | Gm263, Samd: sterile alpha motif domain containing 15                | XM_907143.3, XM |
| 18 | Gene Ism2         | Ism2, Thsd3, G isthmin 2 homolog (zebrafish)                         | XM_138107.7, XM |
| 24 | Gene Sptlc2       | mKIAA0526, L(serine palmitoyltransferase, long chain base subunit    | NM_011479.3     |
| 28 | Gene Alkbh1       | Abh, 2700073(alkB, alkylation repair homolog 1 (E. coli)             | NM_001102565.1  |
| 28 | Gene Mir3068      | mmu-mir-3068 microRNA 3068                                           | NR_037228.1     |
| 28 | Gene Nrp          | neural regeneration protein                                          | NM_001013372.2  |
| 28 | Gene Slirp        | 1810035L17Ri SRA stem-loop interacting RNA binding protein           | NM_026958.3     |
| 28 | Gene Snw1         | SKIP, Snw1, 23 SNW domain containing 1                               | NM_025507.2     |
| 27 | Gene Cep128       | E230024F20, C centrosomal protein 128                                | NM_181815.3     |
| 33 | Gene Gtf2a1       | Gtf2a1, Tfii1, general transcription factor II A, 1                  | NM_175335.3, NM |
| 33 | Gene Ston2        | Ston2, AI4259:stonin 2                                               | NM_175367.6     |
| 31 | Gene Flrt2        | KIAA0405, Flrt fibronectin leucine rich transmembrane protein 2      | NM_201518.4     |
| 33 | Gene Galc         | twitcher, Gacy galactosylceramidase                                  | NM_008079.3     |
| 33 | Gene Gpr65        | Dig1, Gpr65, T G-protein coupled receptor 65                         | NM_008152.2     |
| 18 | Gene Kcnk10       | 3010005K24Ri potassium channel, subfamily K, member 10               | NM_029911.4     |
| 23 | Gene Ptpn21       | Ptpn21, PTPD1 protein tyrosine phosphatase, non-receptor type 21     | NM_011877.2, NM |
| 23 | Gene Zc3h14       | 1700016A15Ri zinc finger CCCH type containing 14                     | NM_029334.2, NM |
| 19 | Gene Eml5         | C130068M19R echinoderm microtubule associated protein like 5         | NM_001081191.1  |
| 32 | Gene Foxn3        | HTLFL1, Ches1 forkhead box N3                                        | NM_183186.2     |
| 17 | Gene 1700064      | 1700064M15R RIKEN cDNA 1700064M15 gene                               | NR_045288.1     |
| 23 | Gene Efcab11      | 2610021K21Ri EF-hand calcium binding domain 11                       | NM_030172.2     |
| 24 | Gene Tdp1         | SCAN1, E4300: tyrosyl-DNA phosphodiesterase 1                        | NM_028354.4     |
| 24 | Gene Kcnk13       | MGC31053, Gr potassium channel, subfamily K, member 13               | NM_146037.2, NM |
| 27 | Gene Psmc1        | Psmc1, S4, P2ε protease (prosome, macropain) 26S subunit, ATPase     | NM_008947.3     |
| 51 | Gene Gm1043       | Gm10433, ENS predicted gene 10433                                    | NR_045282.1     |
| 51 | Gene Calm1        | Calm3, AI3270 calmodulin 1                                           | NM_009790.4     |
| 30 | Gene Rps6ka5      | RLPK, MSPK1, ribosomal protein S6 kinase, polypeptide 5              | NM_153587.2     |
| 33 | Gene Ccdc88c      | Ccdc88c, AV00 coiled-coil domain containing 88C                      | NM_026681.4     |

|    |                 |                                                                     |                  |
|----|-----------------|---------------------------------------------------------------------|------------------|
| 33 | Gene Mir1190    | Mirn1190, mr microRNA 1190                                          | NR_035421.1      |
| 42 | Gene Smek1      | Smek1, 11100: SMEK homolog 1, suppressor of mek1 (Dictyostelium)    | NM_211355.2, NM  |
| 42 | Gene D130020L05 | 9430007L23Ri RIKEN cDNA D130020L05 gene                             | NR_038047.1, NR_ |
| 26 | Gene Trip11     | 2610511G22Ri thyroid hormone receptor interactor 11                 | NM_028446.1      |
| 26 | Gene Gm2003     | Gm20036 predicted gene, 20036                                       | XR_106735.1, XR_ |
| 26 | Gene Atxn3      | A1647473, MJL ataxin 3                                              | NM_029705.3, NM  |
| 23 | Gene Rin3       | C86933, Rin3, Ras and Rab interactor 3                              | NM_177620.4, NM  |
| 21 | Gene Itpk1      | BC031182, Itp inositol 1,3,4-triphosphate 5/6 kinase                | NM_172584.3      |
| 28 | Gene Gm2060     | MGC25937, At predicted gene 20604                                   | NM_001142939.1   |
| 28 | Gene AK01087    | MGC25937, M cDNA sequence AK010878                                  | NM_001142938.1   |
| 28 | Gene Ubr7       | 5730410I19Ri ubiquitin protein ligase E3 component n-recogin 7      | NM_025666.2      |
| 23 | Gene Btbd7      | Btbd7, mKIAA1 BTB (POZ) domain containing 7                         | NM_172806.2      |
| 19 | Gene Unc79      | 9030205A07Ri unc-79 homolog (C. elegans)                            | NM_001081017.2   |
| 24 | Gene Ddx24      | 1700055J08Ri DEAD (Asp-Glu-Ala-Asp) box polypeptide 24              | NM_020494.3, NM  |
| 24 | Gene Ifi2711    | 1110013J02Ri interferon, alpha-inducible protein 27 like 1          | NM_194066.2, NM  |
| 22 | Gene Gsc        | Gsc                                                                 | NM_010351.1      |
| 22 | Gene Gm1000     | Gm10000, ENS predicted gene 10000                                   | XR_141122.1, XR_ |
| 28 | Gene Dicer1     | D12ErtD7e, Dic dicer 1, ribonuclease type III                       | NM_148948.2      |
| 20 | Gene D430019H16 | AI852661, D43 RIKEN cDNA D430019H16 gene                            | NM_001252508.1   |
| 35 | Gene Atg2b      | AI047755, C63 autophagy related 2B                                  | NM_029654.4      |
| 35 | Gene Gskip      | 4933433P14Ri GSK3B interacting protein                              | NM_178613.3      |
| 25 | Gene Ak7        | Ak7, 4930502P adenylate kinase 7                                    | NM_030187.1      |
| 25 | Gene Papola     | Plap, Pap, Pap poly (A) polymerase alpha                            | NM_011112.3      |
| 16 | Gene Bcl11b     | Ctip2, B63000: B cell leukemia/lymphoma 11B                         | NM_021399.2, NM  |
| 16 | Gene Gm1957     | Gm19576 predicted gene, 19576                                       | XR_106743.1, XR_ |
| 22 | Gene Setd3      | D12ErtD771e, SET domain containing 3                                | NM_028262.3      |
| 22 | Gene Ccnk       | CPR4, CycK, A cyclin K                                              | NM_009832.2      |
| 47 | Gene Ccdc85c    | EG668158, Ccc coiled-coil domain containing 85C                     | NM_001159910.1   |
| 29 | Gene Eml1       | A930030P13Ri echinoderm microtubule associated protein like 1       | NM_001043335.1   |
| 24 | Gene Gm1659     | Gm16596 predicted gene, 16596                                       | NR_045751.1, NR_ |
| 24 | Gene Evl        | Evl, AI528774 Ena-vasodilator stimulated phosphoprotein             | NM_001163394.1   |
| 37 | Gene Yy1        | Yy1, NF-E1, AVYY1 transcription factor                              | NM_009537.3      |
| 31 | Gene Slc25a25   | C030003J19Ri solute carrier family 25 (mitochondrial carrier, palm  | NM_181328.3      |
| 31 | Gene Mir345     | mmu-mir-345, microRNA 345                                           | NR_029773.1      |
| 19 | Gene Wdr25      | B930090D16Ri WD repeat domain 25                                    | NM_177602.3      |
| 19 | Gene Begain     | Gm897, BM94 brain-enriched guanylate kinase-associated              | NM_001163175.1   |
| 21 | Gene Dlk1       | Dlk1, Dlk1, Peg delta-like 1 homolog (Drosophila)                   | NM_001190703.1,  |
| 35 | Gene Ppp2r5c    | Ppp2r5c, C852 protein phosphatase 2, regulatory subunit B (B56), g  | NM_001081457.1   |
| 41 | Gene 9430024F10 | 9430024F10Ri RIKEN cDNA 9430024F10 gene                             | XR_168502.1      |
| 41 | Gene B930059L03 | B930059L03Ri RIKEN cDNA B930059L03 gene                             | NR_033340.1      |
| 41 | Gene Dync1h1P22 | DHC1a, A dynein cytoplasmic 1 heavy chain 1                         | NM_030238.2      |
| 34 | Gene Hsp90aa    | Hsp90, Hsp90a heat shock protein 90, alpha (cytosolic), class A men | NM_010480.5      |
| 24 | Gene Stk30      | Rage, MOK, M serine/threonine kinase 30                             | NM_011973.2      |
| 24 | Gene Zfp839     | 2810455K09Ri zinc finger protein 839                                | NM_028365.2, NM  |
| 24 | Gene Mpc1-ps    | Brp44l-ps, Gm. mitochondrial pyruvate carrier 1, pseudogene         |                  |
| 24 | Gene Tecpr2     | mKIAA0297, 4 tectonin beta-propeller repeat containing 2            | NM_001081057.2   |
| 24 | Gene Ankrd9     | 2500003O20Ri ankyrin repeat domain 9                                | NM_175207.4      |

|    |                   |                                                                     |                  |
|----|-------------------|---------------------------------------------------------------------|------------------|
| 27 | Gene Rcor1        | D12Wsu95e, 5 REST corepressor 1                                     | NM_198023.2      |
| 22 | Gene Traf3        | CD40bp, amn, TNF receptor-associated factor 3                       | NM_001048206.1   |
| 22 | Gene Amn          | 5033428N14Ri amnionless                                             | NM_033603.2      |
| 22 | Gene A230087      | A230087F16Ri RIKEN cDNA A230087F16 gene                             | XR_106750.1, XR_ |
| 47 | Gene Cdc42bp      | Cdc42bpb, MRCKb                                                     | NM_183016.2      |
| 27 | Gene Gm266        | Gm266 predicted gene 266                                            | NM_001033248.3   |
| 43 | Gene Eif5         | 2810011H21Ri eukaryotic translation initiation factor 5             | NM_178041.2, NM  |
| 43 | Gene Snora28      | MBI-13, Snora: small nucleolar RNA, H/ACA box 28                    | NR_033168.1      |
| 41 | Gene 2810029      | AU017849, 28: RIKEN cDNA 2810029C07 gene                            | NR_045295.1      |
| 41 | Gene Mark3        | A430080F22Ri MAP/microtubule affinity-regulating kinase 3           | NM_021516.4, NM  |
| 65 | Gene Ckb          | Ckbb, Ckb, Bck creatine kinase, brain                               | NM_021273.4      |
| 65 | Gene Trmt61a      | Trmt61a, Trmε tRNA methyltransferase 61A                            | NM_177374.4, NM  |
| 26 | Gene Apopt1       | 1700081D05Ri apoptogenic, mitochondrial 1                           | NM_026511.2, NM  |
| 33 | Gene Klc1         | Kns2, AI87476: kinesin light chain 1                                | NM_001025360.2   |
| 33 | Gene Xrcc3        | 4432412E01Ri X-ray repair complementing defective repair in Chin    | NM_028875.2      |
| 33 | Gene Zfyve21      | C85416, 1110C zinc finger, FYVE domain containing 21                | NM_026752.4      |
| 28 | Gene Ppp1r13      | ASPP1, p85, AI protein phosphatase 1, regulatory (inhibitor) subuni | NM_011625.1      |
| 30 | Gene Kif26a       | mKIAA1236, KI kinesin family member 26A                             | NM_001097621.1   |
| 17 | Gene Inf2         | 2610204M08R inverted formin, FH2 and WH2 domain containing          | NM_198411.2      |
| 33 | Gene Adssl1       | AI528595, Ads adenylosuccinate synthetase like 1                    | NM_007421.2      |
| 33 | Gene Siva1        | Siva, Siva1, CD SIVA1, apoptosis-inducing factor                    | NM_013929.2, NM  |
| 33 | Gene Akt1         | PKB/Akt, Rac, γ thymoma viral proto-oncogene 1                      | NM_009652.3, NM  |
| 28 | Gene Zbtb42       | simiRP58, Zbtb zinc finger and BTB domain containing 42             | NM_001100460.1   |
| 22 | Gene Cep170       | AW555464, Ki: centrosomal protein 170B                              | NM_001024602.3   |
| 30 | Gene LOC101055828 | protein AHNAK2-like                                                 | XM_003945498.1,  |
| 30 | Gene BC02268      | BC022687, C1: cDNA sequence BC022687                                | NM_145450.3      |
| 36 | Gene Cdca4        | SEI-3, Cdca4, 2 cell division cycle associated 4                    | NM_028023.3      |
| 24 | Gene Jag2         | sm, Serh, Jag2, jagged 2                                            | NM_010588.2      |
| 24 | Gene Nudt14       | 1110030M18R nudix (nucleoside diphosphate linked moiety X)-type     | NM_025399.3      |
| 28 | Gene Brf1         | Brf1, mTFIIB9: BRF1 homolog, subunit of RNA polymerase III transc   | NM_028193.3      |
| 27 | Gene Btbd6        | Btbd6 BTB (POZ) domain containing 6                                 | NM_201646.2, NM  |
| 29 | Gene Pacs2        | Pacs2, AW489: phosphofurin acidic cluster sorting protein 2         | NM_001081170.1   |
| 25 | Gene Mta1         | Mta1, MGC11: metastasis associated 1                                | NM_054081.2      |
| 25 | Gene Crip2        | Crip2, ESP1, C7 cysteine rich protein 2                             | NM_024223.2      |
| 27 | Gene Tmem12       | Hole, Tmem12 transmembrane protein 121                              | NM_153776.2      |
| 25 | Gene Zfp386       | Zfp386, KIAA4: zinc finger protein 386 (Kruppel-like)               | NM_019565.3, NM  |
| 19 | Gene Cdca7        | MGC11998, Cc cell division cycle associated 7 like                  | NM_146040.1      |
| 19 | Gene Sp4          | 5730497N03Ri trans-acting transcription factor 4                    | NM_009239.3, NM  |
| 18 | Gene Sp8          | Sp8, D930049: trans-acting transcription factor 8                   | NM_177082.4      |
| 21 | Gene Gdi2         | GDIB, Gdi3, G[ guanosine diphosphate (GDP) dissociation inhibitor   | NM_008112.4      |
| 38 | Gene BC01642      | MGC25933, AI cDNA sequence BC016423                                 | NM_134063.3      |
| 23 | Gene Gtpbp4       | Nog1, Crfg, 26: GTP binding protein 4                               | NM_027000.4      |
| 25 | Gene Larp4b       | A630096F19, MLa ribonucleoprotein domain family, member 4B          | NM_172585.2      |
| 32 | Gene Zmynd1       | BS69, Zmynd1 zinc finger, MYND domain containing 11                 | NM_144516.3, NM  |
| 19 | Gene Mtr          | MS, Mtr, AI89: 5-methyltetrahydrofolate-homocysteine methyltran     | NM_001081128.3   |
| 19 | Gene Gm2444       | Gm2444 predicted gene 2444                                          | XM_003085847.1,  |
| 25 | Gene Lyst         | Lyst, bg, D13Sf lysosomal trafficking regulator                     | NM_010748.2      |

|    |                          |                                                                        |                  |
|----|--------------------------|------------------------------------------------------------------------|------------------|
| 21 | Gene Hecw1               | Nedl1, Hecw1, HECT, C2 and WW domain containing E3 ubiquitin p         | NM_001081348.3   |
| 23 | Gene Mrpl32              | Mrpl32, 06100 mitochondrial ribosomal protein L32                      | NM_029271.2      |
| 23 | Gene Psma2               | Lmpc3, Psma2 proteasome (prosome, macropain) subunit, alpha ty         | NM_008944.2      |
| 24 | Gene Gli3                | GLI3FL, AI8548 GLI-Kruppel family member GLI3                          | NM_008130.2      |
| 22 | Gene Inhba               | Inhba                                                                  | NM_008380.1      |
| 33 | Gene Cdk13               | 2310015O17Ri cyclin-dependent kinase 13                                | NM_001081058.2,  |
| 23 | Gene Stard3nl            | Stard3nl, AW1 STARD3 N-terminal like                                   | NM_024270.2      |
| 17 | Gene Epdr1               | Ucc1, AU0409! ependymin related protein 1 (zebrafish)                  | NM_134065.4      |
| 17 | Gene Sfrp4               | Sfrp4                                                                  | NM_016687.3      |
| 31 | Gene Elmo1               | 6330578D22Rik, CED-12, AI173001, C230095H21Rik, mKIAA0281, k           | NM_080288.2, NR  |
| 40 | Gene Trim27              | Rfp, AW53889 tripartite motif-containing 27                            | NM_009054.3      |
| 28 | Gene Zkscan8             | D430019P06Ri zinc finger with KRAB and SCAN domains 8                  | NM_001251833.1   |
| 28 | Gene Olfr136f            | MOR130-2, Olf olfactory receptor 136f                                  | NM_146283.2      |
| 19 | Gene Hist1h1k            | H1B, H1s-3, H1 histone cluster 1, H1b                                  | NM_020034.1      |
| 19 | Gene Hist1h3i            | Hist1h3i, Hist1 histone cluster 1, H3i                                 | NM_178207.2      |
| 19 | Gene Hist1h2a            | Hist1h2an, Hist1h2ai, Hist1h2ae, Hist1h2ag, Hist1h2ab, Hist1h2ao,      | NM_178184.1      |
| 19 | Gene Hist1h2k            | Hist1h2bp histone cluster 1, H2bp                                      | NM_178202.2      |
| 34 | Gene Lrrc16a             | 1110037D04Ri leucine rich repeat containing 16A                        | NM_026825.3      |
| 31 | Gene BC005533            | 8030460C05Ri cDNA sequence BC005537                                    | NM_024473.3      |
| 36 | Gene Acot13              | Them2, Acot13 acyl-CoA thioesterase 13                                 | NM_025790.2      |
| 36 | Gene Tdp2                | Tdp2, Ttrap, D13Ertd656e                                               | NM_019551.2      |
| 45 | Gene Sox4                | AA682046, Sox SRY-box containing gene 4                                | NM_009238.2      |
| 37 | Gene E2f3                | E2f3, E2F3b, E2F transcription factor 3                                | NM_010093.3      |
| 25 | Gene Mboat1              | LPEAT1, Moac membrane bound O-acyltransferase domain contain           | NM_153546.4      |
| 29 | Gene Uqcrcf1             | Uqcrcf1, AI875 ubiquinol-cytochrome c reductase, Rieske iron-sulfu     | NM_025710.2      |
| 21 | Gene Foxq1               | sa, Hfh1, Foxq forkhead box Q1                                         | NM_008239.4      |
| 21 | Gene 17000184930551G20Ri | RIKEN cDNA 1700018A04 gene                                             | NR_029439.1      |
| 21 | Gene Foxf2               | Fkh20, FREAC2 forkhead box F2                                          | NM_010225.2      |
| 24 | Gene Foxc1               | Mf1, Foxc1, FR forkhead box C1                                         | NM_008592.2      |
| 24 | Gene 49305484930548F15Ri | RIKEN cDNA 4930548F15 gene                                             | XM_003945503.1,  |
| 21 | Gene Serpinb6            | Serpinb6, Spi3, serine (or cysteine) peptidase inhibitor, clade B, mer | NM_009254.3, NM  |
| 21 | Gene 11100461110046J04Ri | RIKEN cDNA 1110046J04 gene                                             | NR_040707.1      |
| 22 | Gene Bphl                | Bphl, AI11534 biphenyl hydrolase-like (serine hydrolase, breast epi    | NM_026512.1      |
| 22 | Gene Tubb2a              | Tubb2, M(beta tubulin, beta 2A class IIA                               | NM_009450.2      |
| 22 | Gene 49304474930447K03Ri | RIKEN cDNA 4930447K03 gene                                             | NR_046184.1      |
| 28 | Gene Pxdc1               | Pxdc1, 130001 PX domain containing 1                                   | NM_025831.3      |
| 28 | Gene LOC101056149        | uncharacterized LOC101056149                                           | XR_168717.1, XR_ |
| 48 | Gene Prpf4b              | MGC5960, Prp PRP4 pre-mRNA processing factor 4 homolog B (yea          | NM_013830.2      |
| 32 | Gene Cdyl                | Cdyl, AI325931 chromodomain protein, Y chromosome-like                 | NM_009881.3, NM  |
| 40 | Gene Lymr4               | MGC38622, BCLYR motif containing 4                                     | NM_201358.2      |
| 40 | Gene Fars2               | Fars1, Fars2, 2 phenylalanine-tRNA synthetase 2 (mitochondrial)        | NM_024274.2, NM  |
| 30 | Gene Rreb1               | 1110037N09Ri ras responsive element binding protein 1                  | NM_001039188.1   |
| 28 | Gene Ssr1                | SSR, 2510001K signal sequence receptor, alpha                          | NM_025965.3      |
| 20 | Gene Cage1               | 4933427I01Rik cancer antigen 1                                         | NM_027724.2      |
| 20 | Gene Riok1               | MGC7300, 543 RIO kinase 1 (yeast)                                      | NM_024242.3      |
| 22 | Gene Dsp                 | 2300002E22Ri desmoplakin                                               | NM_023842.2      |
| 25 | Gene Bmp6                | Vgr1, Bmp6, D bone morphogenetic protein 6                             | NM_007556.2      |

|    |               |                                                                                   |                 |
|----|---------------|-----------------------------------------------------------------------------------|-----------------|
| 26 | Gene Txndc5   | ERp46, AL0226 thioredoxin domain containing 5                                     | NM_145367.3     |
| 37 | Gene Eef1e1   | Eef1e1, 11100 eukaryotic translation elongation factor 1 epsilon 1                | NM_025380.2     |
| 18 | Gene Slc35b3  | Slc35b3, AI428 solute carrier family 35, member B3                                | NM_134060.4, NM |
| 20 | Gene Tfp2a    | Ap2, Tfp2a, A transcription factor AP-2, alpha                                    | NM_011547.3, NM |
| 19 | Gene Pak1ip1  | PIP1, Pak1ip1, PAK1 interacting protein 1                                         | NM_026550.3     |
| 19 | Gene Tmem14   | 1110021D01Ri transmembrane protein 14C                                            | NM_025387.3     |
| 19 | Gene Mak      | Mak, A930010 male germ cell-associated kinase                                     | NM_008547.2, NM |
| 25 | Gene Elovl2   | Scs2, Elovl2, A elongation of very long chain fatty acids (FEN1/Elo2, NM_019423.2 | NM_019423.2     |
| 25 | Gene Hivep1   | Hivep1, Cryab, human immunodeficiency virus type I enhancer binding               | NM_007772.2     |
| 33 | Gene Gfod1    | 9630032O13, glucose-fructose oxidoreductase domain containing                     | NM_001033399.4  |
| 28 | Gene Sirt5    | 0610012J09Ri sirtuin 5 (silent mating type information regulation 2               | NM_178848.3     |
| 28 | Gene Nol7     | NOP27, Nol7, nucleolar protein 7                                                  | NM_023554.2     |
| 28 | Gene Ranbp9   | RanBPM, Ranbp9, RAN binding protein 9                                             | NM_019930.2     |
| 38 | Gene Dtnbp1   | Dtnbp1, AW04 dystrobrevin binding protein 1                                       | NM_025772.4     |
| 31 | Gene Mylip    | Mylip, 943005 myosin regulatory light chain interacting protein                   | NM_153789.3     |
| 31 | Gene Atxn1    | Ataxin-1, Sca1, ataxin 1                                                          | NM_001199305.1  |
| 31 | Gene 503343C  | 5033430I15Ri RIKEN cDNA 5033430I15 gene                                           | XR_141159.1     |
| 20 | Gene C78339   | C78339 expressed sequence C78339                                                  | NM_001033192.2  |
| 40 | Gene Nup153   | C88147, Nup153 nucleoporin 153                                                    | NM_175749.2     |
| 30 | Gene Kif13a   | Kif13a, KIAA41 kinesin family member 13A                                          | NM_010617.2     |
| 32 | Gene Tpmt     | AW106912, Tp thiopurine methyltransferase                                         | NM_016785.2     |
| 32 | Gene Kdm1b    | MGC38211, Kdm1b lysine (K)-specific demethylase 1B                                | NM_172262.3     |
| 24 | Gene A330033  | A330033J07Ri RIKEN cDNA A330033J07 gene                                           | XR_105535.1     |
| 21 | Gene Id4      | bHLHb27, Id4 inhibitor of DNA binding 4                                           | NM_031166.2     |
| 21 | Gene A330048  | A330048O09R RIKEN cDNA A330048O09 gene                                            | NR_045162.1     |
| 36 | Gene Fam120a  | Ossa, Fam120a, KIAA0183, C9orf10                                                  | NM_001033268.2  |
| 36 | Gene Fam120b  | Fam120aos, C family with sequence similarity 120A opposite strand                 | NR_015601.1     |
| 23 | Gene 1110007  | Bincard, AI851 RIKEN cDNA 1110007C09 gene                                         | NM_026738.2     |
| 17 | Gene Bicd2    | KIAA0699, Bicd bicaudal D homolog 2 (Drosophila)                                  | NM_001039179.1  |
| 26 | Gene Ippk     | InsP6, Ippk, 18 inositol 1,3,4,5,6-pentakisphosphate 2-kinase                     | NM_199056.2     |
| 26 | Gene Cenpp    | 1700022C02Ri centromere protein P                                                 | NM_025495.3     |
| 26 | Gene Nol8     | 5730412B09Ri nucleolar protein 8                                                  | NM_001081350.1  |
| 34 | Gene Fbxw7    | Fbxw7, 11100 F-box and WD-40 domain protein 17                                    | NM_175401.3     |
| 25 | Gene 9430083  | 9430083A17Ri RIKEN cDNA 9430083A17 gene                                           | NR_029463.1     |
| 25 | Gene Spin1    | Spin, MGC277 spinclin 1                                                           | NM_011462.2, NM |
| 26 | Gene Cks2     | CKSHS2, Cks2, CDC28 protein kinase regulatory subunit 2                           | NM_025415.3     |
| 26 | Gene Secisbp2 | SBP2, 2210413 SECIS binding protein 2                                             | NM_029279.1     |
| 27 | Gene Gadd45   | C86281, DDIT2 growth arrest and DNA-damage-inducible 45 gamma                     | NM_011817.2     |
| 27 | Gene Auh      | C77140, Auh, AU RNA binding protein/enoyl-coenzyme A hydratase                    | NM_016709.2     |
| 26 | Gene Nfil3    | AV225605, Nfil3 nuclear factor, interleukin 3, regulated                          | NM_017373.3     |
| 41 | Gene Ror2     | Ror2, mRor2, receptor tyrosine kinase-like orphan receptor 2                      | NM_013846.3     |
| 21 | Gene Msx2     | Hox8.1, Msx2, homeobox, msh-like 2                                                | NM_013601.2     |
| 37 | Gene Thoc3    | 2410044K02Ri THO complex 3                                                        | NM_028597.3     |
| 31 | Gene Gm2830   | Gm16247, Gm predicted gene 2830                                                   |                 |
| 31 | Gene Simc1    | Simc1, 473247 SUMO-interacting motifs containing 1                                | NM_176987.4     |
| 36 | Gene 4833439  | C81457, 49305 RIKEN cDNA 4833439L19 gene                                          | NM_001252645.1  |
| 36 | Gene Arl10    | Arl10a, MGC14 ADP-ribosylation factor-like 10                                     | NM_019968.2     |

|    |              |                                                                    |                 |
|----|--------------|--------------------------------------------------------------------|-----------------|
| 36 | Gene Nop16   | AA409471, D1. NOP16 nucleolar protein                              | NM_178605.4     |
| 30 | Gene Cltb    | 2310046E19Ri clathrin, light polypeptide (Lcb)                     | NM_028870.3     |
| 41 | Gene Rnf44   | Rnf44, mKIAA1 ring finger protein 44                               | NM_001146025.1  |
| 34 | Gene Cdhr2   | Gm624, Cdhr2 cadherin-related family member 2                      | NM_001033364.3  |
| 16 | Gene Unc5a   | Unc5h1, Unc5: unc-5 homolog A (C. elegans)                         | NM_153131.3     |
| 19 | Gene Fgfr4   | Fgfr4, Fgfr-4 fibroblast growth factor receptor 4                  | NM_008011.2     |
| 29 | Gene Nsd1    | Nsd1, AI52850 nuclear receptor-binding SET-domain protein 1        | NM_008739.3     |
| 28 | Gene Rab24   | Rab24, 65304C RAB24, member RAS oncogene family                    | NM_009000.3     |
| 28 | Gene Preli1  | Preli, 2610524 PRELI domain containing 1                           | NM_025596.5     |
| 28 | Gene Mxd3    | Mad3, Mxd3, Max dimerization protein 3                             | NM_016662.4     |
| 24 | Gene Grk6    | Gprk6, Grk6 G protein-coupled receptor kinase 6                    | NM_011938.3, NM |
| 33 | Gene Prr7    | Prr7, XM_4842 proline rich 7 (synaptic)                            | NM_001030296.4  |
| 33 | Gene Dbn1    | Dbn1                                                               | NM_001177371.1  |
| 55 | Gene Pdlim7  | 2410002J21Ri PDZ and LIM domain 7                                  | NM_026131.3, NM |
| 55 | Gene Dok3    | AI450713, Dok docking protein 3                                    | NM_013739.2     |
| 19 | Gene Tmed9   | Tmed9, 24000 transmembrane emp24 protein transport domain c        | NM_026211.3     |
| 19 | Gene B4galt7 | B4galt7, MGC2 xylosylprotein beta1,4-galactosyltransferase, polype | NM_146045.1     |
| 26 | Gene Caml    | Camlg, AI3857 calcium modulating ligand                            | NM_007596.2     |
| 26 | Gene Ddx46   | Ddx46, mKIAA DEAD (Asp-Glu-Ala-Asp) box polypeptide 46             | NM_145975.3     |
| 22 | Gene B230219 | D530037I19Ri RIKEN cDNA B230219D22 gene                            | NM_181278.2     |
| 29 | Gene Txndc15 | AI854086, 231 thioredoxin domain containing 15                     | NM_175150.3     |
| 28 | Gene Pcbd2   | Pcbd2, Dcoh2, pterin 4 alpha carbinolamine dehydratase/dimerizat   | NM_028281.1     |
| 20 | Gene Pitx1   | Pitx1, Ptx1, P-Cpaired-like homeodomain transcription factor 1     | NM_011097.2     |
| 26 | Gene H2afy   | macroH2A1, r H2A histone family, member Y                          | NM_012015.2, NM |
| 47 | Gene HnrnpaC | 3010025E17Ri heterogeneous nuclear ribonucleoprotein A0            | NM_029872.1     |
| 36 | Gene Ubqln1  | C77538, Dsk2, ubiquilin 1                                          | NM_026842.4, NM |
| 26 | Gene Gkap1   | 4933400B15Ri G kinase anchoring protein 1                          | NM_019832.3     |
| 38 | Gene 2210016 | 2210016F16Ri RIKEN cDNA 2210016F16 gene                            | NM_027335.1     |
| 38 | Gene Hnrnpk  | Hnrpk, MGC10 heterogeneous nuclear ribonucleoprotein K             | NM_025279.2     |
| 38 | Gene Mir7-1  | mmu-mir-7-1, microRNA 7-1                                          | NR_029825.1     |
| 34 | Gene Rmi1    | Rmi1, C79893, RMI1, RecQ mediated genome instability 1, homolog    | NM_028904.3, NM |
| 25 | Gene A230056 | A230056J06Ri RIKEN cDNA A230056J06 gene                            | NR_045633.1     |
| 25 | Gene Naa35   | A330027C19Ri N(alpha)-acetyltransferase 35, NatC auxiliary subuni  | NM_030153.2     |
| 23 | Gene Golm1   | AW125446, M golgi membrane protein 1                               | NM_027307.4, NM |
| 24 | Gene Zcchc6  | Zcchc6, 60304 zinc finger, CCHC domain containing 6                | NM_153538.3     |
| 55 | Gene Gas1    | Gas1, Gas-1, A growth arrest specific 1                            | NM_008086.2     |
| 43 | Gene Ptch1   | Ptch, Ptch1, Pt patched homolog 1                                  | NM_008957.2     |
| 44 | Gene Zfp367  | 8030486J21Ri zinc finger protein 367                               | NM_175494.4     |
| 44 | Gene Habp4   | Habp4, 49334 hyaluronic acid binding protein 4                     | NM_019986.3     |
| 21 | Gene Cdc14b  | A530086E13Ri CDC14 cell division cycle 14B                         | NM_172587.3, NM |
| 21 | Gene 1810034 | 1810034E14Ri RIKEN cDNA 1810034E14 gene                            | NR_045798.1     |
| 22 | Gene Aaed1   | Aaed1, 111001AhpC/TSA antioxidant enzyme domain containing 1       | NM_025370.2     |
| 33 | Gene Ctsl    | nkt, fs, MEP, C cathepsin L                                        | NM_009984.3     |
| 18 | Gene Hiatl1  | 5730414C17Ri hippocampus abundant transcript-like 1                | NM_133680.3, NM |
| 28 | Gene Mterfd1 | MTERF3, 2410 MTERF domain containing 1                             | NM_025547.3     |
| 28 | Gene Ptdss1  | mKIAA0024, A phosphatidylserine synthase 1                         | NM_008959.3     |
| 26 | Gene Adcy2   | mKIAA1060, N adenylate cyclase 2                                   | NM_153534.2     |

|    |               |                                                                              |                 |
|----|---------------|------------------------------------------------------------------------------|-----------------|
| 40 | Gene Papd7    | MGC69673, TFAP associated domain containing 7                                | NM_198600.2, NM |
| 40 | Gene A530095  | A530095I07Ri RIKEN cDNA A530095I07 gene                                      | XR_035386.2     |
| 20 | Gene Ube2ql1  | Ube2ql1, 3110 ubiquitin-conjugating enzyme E2Q family-like 1                 | NM_001145162.1  |
| 25 | Gene Med10    | AA959813, Me mediator of RNA polymerase II transcription, subunit            | NM_138596.2     |
| 19 | Gene BC018507 | C77245, mKIAA cDNA sequence BC018507                                         | NM_144837.3     |
| 27 | Gene Gm1026   | Gm10263, ENS40S ribosomal protein S28 pseudogene                             |                 |
| 27 | Gene Ndufs6   | BC059730, IP1 NADH dehydrogenase (ubiquinone) Fe-S protein 6                 | NM_010888.2, NR |
| 27 | Gene Mrpl36   | AI646041, Mrpl36 mitochondrial ribosomal protein L36                         | NM_053163.1     |
| 21 | Gene Lpcat1   | LPCAT, BB1375 lysophosphatidylcholine acyltransferase 1                      | NM_145376.5     |
| 25 | Gene Clptm1l  | Clptm1l, C130 (CLPTM1-like)                                                  | NM_146047.2     |
| 32 | Gene Slc12a7  | Kcc4, D13Ert domain: solute carrier family 12, member 7                      | NM_011390.2     |
| 37 | Gene Trip13   | 2410002G23Ri thyroid hormone receptor interactor 13                          | NM_027182.2     |
| 37 | Gene Brd9     | Brd9, AL02277 bromodomain containing 9                                       | NM_001024508.2  |
| 20 | Gene Tppp     | 2900041A09Ri tubulin polymerization promoting protein                        | NM_182839.2     |
| 30 | Gene Sdha     | SDHF, 492151: succinate dehydrogenase complex, subunit A, flavoprotein       | NM_023281.1     |
| 30 | Gene Ccdc127  | AW050060, 54 coiled-coil domain containing 127                               | NM_024201.3, NM |
| 30 | Gene Lrrc14b  | Lrrc14b, AI595 leucine rich repeat containing 14B                            | NM_001033042.3  |
| 25 | Gene Erap1    | Arts1, ERAAP, endoplasmic reticulum aminopeptidase 1                         | NM_030711.4     |
| 17 | Gene Eil2     | Eil2                                                                         | NM_138953.2     |
| 26 | Gene Rhobtb3  | Rhobtb3, 1700 Rho-related BTB domain containing 3                            | NM_028493.2     |
| 27 | Gene Ankrd32  | 2700017A04Ri ankyrin repeat domain 32                                        | NM_134071.3     |
| 27 | Gene 2210408  | MGC107105, 2 RIKEN cDNA 2210408I21 gene                                      | NM_001081353.1, |
| 23 | Gene Fam172i  | Fam172a, AF01 family with sequence similarity 172, member A                  | NM_138312.1, NM |
| 29 | Gene Arrdc3   | mKIAA1376, N arrestin domain containing 3                                    | NM_001042591.1  |
| 24 | Gene Polr3g   | RPC32, AV275: polymerase (RNA) III (DNA directed) polypeptide G              | NM_001081176.1  |
| 24 | Gene Mblac2   | 2900024O10Ri metallo-beta-lactamase domain containing 2                      | NM_028372.1     |
| 29 | Gene Ccnh     | AI661354, Ccn cyclin H                                                       | NM_023243.5     |
| 19 | Gene Rasa1    | RasGAP, MGC7 RAS p21 protein activator 1                                     | NM_145452.3     |
| 24 | Gene Xrcc4    | Xrcc4, AW545: X-ray repair complementing defective repair in Chinese hamster | NM_028012.4, XM |
| 24 | Gene Tmem16f  | Tmem167a, 57 transmembrane protein 167                                       | NM_025335.3     |
| 31 | Gene Ssbp2    | AU067692, Ssb single-stranded DNA binding protein 2                          | NM_024186.5, NM |
| 23 | Gene Zcchc9   | 1810019C21Ri zinc finger, CCHC domain containing 9                           | NM_145453.2     |
| 30 | Gene Rasgrf2  | Ras-GRF2, RasGAP RAS protein-specific guanine nucleotide-releasing factor    | NM_009027.3     |
| 21 | Gene Ankrd34  | DP58, Ankrd34 ankyrin repeat domain 34B                                      | NM_175455.4     |
| 25 | Gene Zfyve16  | mKIAA0305, B zinc finger, FYVE domain containing 16                          | NM_173392.4     |
| 29 | Gene Serinc5  | TPO1, A13003: serine incorporator 5                                          | NM_172588.2     |
| 22 | Gene Mtx3     | AA409304, AU metaxin 3                                                       | NM_001162945.1  |
| 39 | Gene Homer1   | PSD-Zip45, SYM homer homolog 1 (Drosophila)                                  | NM_152134.2, NM |
| 36 | Gene Jmy      | AA591059, Jmy junction-mediating and regulatory protein                      | NM_021310.3     |
| 26 | Gene Arsb     | Asr-1, As-1t, A: arylsulfatase B                                             | NM_009712.3     |
| 20 | Gene Scamp1   | 4930505M11R secretory carrier membrane protein 1                             | NM_029153.1     |
| 22 | Gene Gm9776   | Gm9776, ENSM predicted gene 9776                                             | NR_045619.1     |
| 22 | Gene Ap3b1    | pe, pearl, beta adaptor-related protein complex 3, beta 1 subunit            | NM_009680.3     |
| 24 | Gene Tbca     | Tbca13, Tbca                                                                 | NM_009321.2     |
| 23 | Gene Wdr41    | MSTP048, B83 WD repeat domain 41                                             | NM_172590.3     |
| 22 | Gene Zbed3    | AU018975, 26: zinc finger, BED domain containing 3                           | NM_028106.2     |
| 22 | Gene Mir1940  | mmu-mir-1940 (microRNA 1940)                                                 | NR_035461.1     |



|    |              |                                                                          |                  |
|----|--------------|--------------------------------------------------------------------------|------------------|
| 22 | Gene Snora47 | MBI-115, Snor. small nucleolar RNA, H/ACA box 47                         | NR_034043.1      |
| 22 | Gene Aggf1   | 2310029P06Ri angiogenic factor with G patch and FHA domains 1            | NM_025630.2      |
| 24 | Gene F2r     | MGC28086, Th coagulation factor II (thrombin) receptor                   | NM_010169.3      |
| 24 | Gene Iqgap2  | AI788777, 493 IQ motif containing GTPase activating protein 2            | NM_027711.1      |
| 33 | Gene Hmgcr   | MGC103269, H 3-hydroxy-3-methylglutaryl-Coenzyme A reductase             | NM_008255.2      |
| 20 | Gene Gcnt4   | Gm279, Gm73 glucosaminyl (N-acetyl) transferase 4, core 2 (beta-1        | NM_001166065.1   |
| 43 | Gene Enc1    | Nrpb, Enc1, Pl(ectodermal-neural cortex 1                                | NM_007930.4      |
| 29 | Gene Utp15   | AW544865, Ut UTP15, U3 small nucleolar ribonucleoprotein, homo           | NM_178918.3      |
| 29 | Gene Ankra2  | AU023827, AI4 ankyrin repeat, family A (RFXANK-like), 2                  | NM_023472.1      |
| 23 | Gene Btf3    | 1700054E11Ri basic transcription factor 3                                | NM_145455.3, NM  |
| 23 | Gene Gm9828  | Gm9828, ENSM predicted gene 9828                                         | XR_106822.1, XR_ |
| 32 | Gene Tnp1    | MIP, Kpnb2, M transportin 1                                              | NM_001048267.1   |
| 22 | Gene Ptd2    | 1190005P08Ri pentatricopeptide repeat domain 2                           | NM_026873.2      |
| 22 | Gene Mrps27  | Mrps27, 2610( mitochondrial ribosomal protein S27                        | NM_173757.3      |
| 31 | Gene Map1b   | MGC169657, M microtubule-associated protein 1B                           | NM_008634.2      |
| 21 | Gene Bdp1    | KIAA1241, AI6I B double prime 1, subunit of RNA polymerase III tra       | NM_001081061.1   |
| 21 | Gene Serf1   | m4F5, Msmac: small EDRK-rich factor 1                                    | NM_011353.2      |
| 27 | Gene Smn1    | Smn, Gemin1, survival motor neuron 1                                     | NM_011420.2, NM  |
| 17 | Gene Ocln    | AI503564, Oclr occludin                                                  | NM_008756.2      |
| 20 | Gene Mrps36  | Mrps36, 1110( mitochondrial ribosomal protein S36                        | NM_001190264.1   |
| 44 | Gene Cenph   | AU044255, EN centromere protein H                                        | NM_021886.1      |
| 44 | Gene Ccnb1   | Ccnb1-rs13, Cy cyclin B1                                                 | NM_172301.3      |
| 29 | Gene Slc30a5 | Slc30a5, ZnT-5 solute carrier family 30 (zinc transporter), member 5     | NM_022885.2      |
| 37 | Gene Pik3r1  | PI3K, p85alpha phosphatidylinositol 3-kinase, regulatory subunit, pr     | NM_001024955.1   |
| 22 | Gene Mast4   | mKIAA0303, M microtubule associated serine/threonine kinase fam          | NM_175171.3      |
| 26 | Gene Nln     | C79345, 49304 neurolysin (metallopeptidase M3 family)                    | NM_029447.2      |
| 26 | Gene Sgtb    | MGC27660, C( small glutamine-rich tetratricopeptide repeat (TPR)-        | NM_144838.1      |
| 23 | Gene Ipo11   | E330021B14Ri importin 11                                                 | NM_029665.3      |
| 23 | Gene Dimt1   | AV111347, 15(DIM1 dimethyladenosine transferase 1-like (S. cerev         | NM_025447.4      |
| 24 | Gene Kif2a   | Kns2, Kif2a, Kif kinesin family member 2A                                | NM_008442.2, NM  |
| 24 | Gene 3830408 | 3830408C21Ri RIKEN cDNA 3830408C21 gene                                  | NR_015471.1      |
| 28 | Gene Zswim6  | Zswim6, mKIA zinc finger SWIM-type containing 6                          | NM_145456.2      |
| 27 | Gene 3021401 | 3021401N23Ri RIKEN cDNA 3021401N23 gene                                  | XM_003945523.1,  |
| 27 | Gene Smim15  | 2810008M24R small integral membrane protein 15                           | NM_001048250.2   |
| 30 | Gene Nduf2   | C86051, 1810( NADH dehydrogenase (ubiquinone) 1 alpha subcom             | NM_001127346.1   |
| 30 | Gene Ercc8   | 2410022P04Ri excision repairross-complementing rodent repair def         | NM_028042.3      |
| 33 | Gene Depdc1k | AW260467, 98 DEP domain containing 1B                                    | NM_178683.4      |
| 24 | Gene Pde4d   | 9630011N22Ri phosphodiesterase 4D, cAMP specific                         | NM_011056.3      |
| 24 | Gene Mir1904 | Mir1904, Mirn microRNA 1904                                              | NR_035442.1      |
| 31 | Gene Plk2    | Snk, Plk2                                                                | NM_152804.2      |
| 28 | Gene Gbbp1   | mGPBP, 1700( GC-rich promoter binding protein 1                          | NM_028487.4, NM  |
| 25 | Gene Mier3   | AU015422, D1 mesoderm induction early response 1, family memb            | NM_172593.3      |
| 27 | Gene Map3k1  | Mekk, MEKK1, mitogen-activated protein kinase kinase kinase 1            | NM_011945.2      |
| 27 | Gene Gm1532  | OTTMUSG000( predicted gene 15327                                         | XR_105588.1      |
| 28 | Gene Il6st   | Il6st, CD130, g interleukin 6 signal transducer                          | NM_010560.3      |
| 39 | Gene Ppap2a  | mPAP, LPP1, L( phosphatidic acid phosphatase type 2A                     | NM_008903.1, NM  |
| 22 | Gene Skiv2l2 | Skiv2l2, 26105 superkiller viralicidic activity 2-like 2 (S. cerevisiae) | NM_028151.2      |

|    |                   |                                                                      |                  |
|----|-------------------|----------------------------------------------------------------------|------------------|
| 22 | Gene Dhx29        | 3732415M03, DEAH (Asp-Glu-Ala-His) box polypeptide 29                | NM_172594.2      |
| 29 | Gene Snx18        | Snag1, Snx18 sorting nexin 18                                        | NM_130796.4      |
| 18 | Gene Fst          | AL033346, Fst follistatin                                            | NM_008046.2      |
| 23 | Gene Itga1        | E130012M19R integrin alpha 1                                         | NM_001033228.3   |
| 23 | Gene Pelo         | Pelo, AA40989 pelota homolog (Drosophila)                            | NM_134058.3      |
| 23 | Gene Gm1073       | Gm10734, ENS predicted gene 10734                                    | XR_105590.1      |
| 19 | Gene Parp8        | 2810430O08Ri poly (ADP-ribose) polymerase family, member 8           | NM_001081009.1   |
| 30 | Gene Mrps30       | PAP, 2610020/ mitochondrial ribosomal protein S30                    | NM_021556.3      |
| 16 | Gene Paip1        | Paip1 polyadenylate binding protein-interacting protein 1            | NM_001079849.1   |
| 39 | Gene LOC101055764 | transmembrane protein C5orf28 homolog                                | XM_003945519.1,  |
| 34 | Gene 1700074      | 1700074H08Ri RIKEN cDNA 1700074H08 gene                              | NR_045296.1      |
| 34 | Gene Hmgcs1       | B130032C06Ri 3-hydroxy-3-methylglutaryl-Coenzyme A synthase 1        | NM_145942.4      |
| 23 | Gene Zfp131       | Znf131, Zfp131 zinc finger protein 131                               | NM_028245.3      |
| 37 | Gene Ptprg        | AW046354, Pt protein tyrosine phosphatase, receptor type, G          | NM_008981.3      |
| 21 | Gene Atxn7        | AI627028, A43 ataxin 7                                               | NM_139227.4      |
| 20 | Gene Psmc6        | Psmc6, 24000/ proteasome (prosome, macropain) 26S subunit, non       | NM_025550.2      |
| 23 | Gene Slc4a7       | E430014N10Ri solute carrier family 4, sodium bicarbonate cotransp    | NM_001033270.2   |
| 31 | Gene Oxsm         | Oxsm, 493342 3-oxoacyl-ACP synthase, mitochondrial                   | NM_027695.3      |
| 31 | Gene Ngly1        | Png1, PNGase, N-glycanase 1                                          | NM_021504.3      |
| 27 | Gene Top2b        | D230016L12Ri topoisomerase (DNA) II beta                             | NM_009409.2      |
| 22 | Gene Thrb         | MGC141270, T thyroid hormone receptor beta                           | NM_009380.3, NM  |
| 42 | Gene Nr1d2        | Rev-erb, RVR, I nuclear receptor subfamily 1, group D, member 2      | NM_011584.4      |
| 19 | Gene 2700060      | 2700060E02Ri RIKEN cDNA 2700060E02 gene                              | NM_026528.3      |
| 22 | Gene Ecd          | 5730461K03Ri ecdysoneless homolog (Drosophila)                       | NM_027475.3      |
| 27 | Gene Fam149l      | mKIAA0974, F family with sequence similarity 149, member B           | NM_001177633.1   |
| 27 | Gene Dnajc9       | Dnajc9, 53304 DnaJ (Hsp40) homolog, subfamily C, member 9            | NM_134081.5      |
| 27 | Gene Mrps16       | 1500011E11Ri mitochondrial ribosomal protein S16                     | NM_025440.2      |
| 27 | Gene Ttc18        | 5330402L21Ri tetratricopeptide repeat domain 18                      | NM_029698.1, NM  |
| 32 | Gene Ppp3cb       | CnAbeta, Ppp3 protein phosphatase 3, catalytic subunit, beta isoform | NM_008914.2      |
| 32 | Gene 1810062      | 1810062O18Ri RIKEN cDNA 1810062O18 gene                              | NR_033571.1      |
| 32 | Gene Usp54        | 4930429G18Ri ubiquitin specific peptidase 54                         | NM_030180.2      |
| 31 | Gene 2810402      | 2810402E24Ri RIKEN cDNA 2810402E24 gene                              | XR_106841.2, XR_ |
| 31 | Gene Myoz1        | 2310001N11Ri myozenin 1                                              | NM_021508.3      |
| 25 | Gene Synpo2l      | 1110054M18R synaptopodin 2-like                                      | NM_175132.3      |
| 36 | Gene Sec24c       | 2610204K03Ri Sec24 related gene family, member C (S. cerevisiae)     | NM_172596.2, NM  |
| 41 | Gene Fut11        | 3110009G03Ri fucosyltransferase 11                                   | NM_028428.2      |
| 41 | Gene 6230400      | 6230400D17Ri RIKEN cDNA 6230400D17 gene                              | NR_029446.1      |
| 41 | Gene Chchd1       | MGC106657, C coiled-coil-helix-coiled-coil-helix domain containing   | NM_025366.3      |
| 41 | Gene Zswim8       | 2310021P13Ri zinc finger SWIM-type containing 8                      | NM_001252081.1   |
| 40 | Gene Ndst2        | Mndns, NDST- N-deacetylase/N-sulfotransferase (heparan glucosar      | NM_010811.2      |
| 40 | Gene Camk2g       | 5930429P18Ri calcium/calmodulin-dependent protein kinase II gan      | NM_001039139.1   |
| 29 | Gene Vcl          | AI462105, AA5 vinculin                                               | NM_009502.4      |
| 27 | Gene Adk          | 5033405D03Ri adenosine kinase                                        | NM_001243041.1   |
| 32 | Gene Kat6b        | Morf, qkf, B13 K(lysine) acetyltransferase 6B                        | NM_017479.3, NM  |
| 26 | Gene Dusp13       | MDSP, Gm120 dual specificity phosphatase 13                          | NM_013849.3, NM  |
| 26 | Gene Samd8        | SMSr, Samd8, sterile alpha motif domain containing 8                 | NM_026283.2      |
| 29 | Gene Vdac2        | Vdac2, Vdac6 voltage-dependent anion channel 2                       | NM_011695.2      |

|    |              |                                                                      |                  |
|----|--------------|----------------------------------------------------------------------|------------------|
| 29 | Gene Comtd1  | MT773, Comtc catechol-O-methyltransferase domain containing 1        | NM_026965.2      |
| 29 | Gene A430057 | A430057M04R RIKEN cDNA A430057M04 gene                               | XR_106835.1, XR_ |
| 38 | Gene Zfp503  | Zfp503, Znf503 zinc finger protein 503                               | NM_145459.3      |
| 25 | Gene Kcnma1  | MaxiK, Slo, Kcr potassium large conductance calcium-activated chan   | NM_001253358.1   |
| 25 | Gene Dlg5    | 4933429D20Ri discs, large homolog 5 (Drosophila)                     | NM_001163513.1   |
| 36 | Gene Gm1774  | Gm1774 predicted gene, 17747                                         | XR_106490.2, XR_ |
| 36 | Gene Zmiz1   | Rai17, Gm103 zinc finger, MIZ-type containing 1                      | NM_183208.3      |
| 16 | Gene Israa   | immune system released activating agent                              | XR_168525.1, XR_ |
| 33 | Gene Ppif    | PPIase, CyP-D, peptidylprolyl isomerase F (cyclophilin F)            | NM_134084.1      |
| 33 | Gene Ppifos  | Ppifos, 493052 peptidylprolyl isomerase F, opposite strand transcrip | NR_028021.1      |
| 33 | Gene Zcchc24 | 2310047A01Ri zinc finger, CCHC domain containing 24                  | NM_001101433.1   |
| 25 | Gene Anxa11  | Anx11, Anxa11 annexin A11                                            | NM_013469.2      |
| 39 | Gene Slmap   | KIAA1601, D3 sarcolemma associated protein                           | NM_032008.3      |
| 31 | Gene Dennd6  | MGC38041, Fa DENN/MADD domain containing 6A                          | NM_145969.4, NM  |
| 33 | Gene Pde12   | 2'-PDE, E4300 phosphodiesterase 12                                   | NM_178668.3      |
| 35 | Gene Il17rd  | AI428510, Il17 interleukin 17 receptor D                             | NM_134437.3      |
| 32 | Gene D14Abb  | 4933409E02Ri DNA segment, Chr 14, Abbott 1 expressed                 | NM_028945.1, NM  |
| 21 | Gene Wnt5a   | Wnt5a, 80304 wingless-related MMTV integration site 5A               | NM_001256224.1,  |
| 18 | Gene Selk    | 1110001C03Ri selenoprotein K                                         | NM_019979.2      |
| 18 | Gene Actr8   | ARP8, Actr8, 5' ARP8 actin-related protein 8                         | NM_027493.3      |
| 20 | Gene Prkcd   | Prkcd, PKCdelta protein kinase C, delta                              | NM_011103.3      |
| 22 | Gene Rft1    | Rft1, D930025 RFT1 homolog (S. cerevisiae)                           | NM_177815.3      |
| 30 | Gene Sfmbt1  | 9330180L21Ri Scm-like with four mbt domains 1                        | NM_019460.2, NM  |
| 23 | Gene Tmem11  | Tmem110, AW transmembrane protein 110                                | NM_028839.4      |
| 40 | Gene Spcs1   | Spcs1, 181000 signal peptidase complex subunit 1 homolog (S. cere    | NM_026911.3      |
| 40 | Gene Glt8d1  | 5430414N14Ri glycosyltransferase 8 domain containing 1               | NM_029626.2, NM  |
| 25 | Gene Gnl3    | Gnl3, C77032, guanine nucleotide binding protein-like 3 (nucleolar   | NM_153547.5      |
| 25 | Gene Snord69 | MBII-210, Sno small nucleolar RNA, C/D box 69                        | NR_028531.1      |
| 25 | Gene Snord19 | Snord19, MBII small nucleolar RNA, C/D box 19                        | NR_028523.1      |
| 30 | Gene Pbrm1   | BAF180, Pb1, polybromo 1                                             | NM_001081251.1   |
| 30 | Gene Smim4   | Smim4, Snhg8, small itegral membrane protein 4                       | NR_024069.2      |
| 30 | Gene Nt5dc2  | 2510015F01Ri 5'-nucleotidase domain containing 2                     | NM_027289.1      |
| 30 | Gene Stab1   | Stab1, KIAA02 stabilin 1                                             | NM_138672.2      |
| 27 | Gene Phf7    | 1700010P14Ri PHD finger protein 7                                    | NM_027949.1      |
| 27 | Gene Bap1    | AA989761, AM Brca1 associated protein 1                              | NM_027088.2      |
| 27 | Gene Dnahc1  | E030034C22Ri dynein, axonemal, heavy chain 1                         | NM_001033668.1   |
| 42 | Gene Capn7   | Capn7, PalBH, calpain 7                                              | NM_009796.2      |
| 34 | Gene Sh3bp5  | AI606498, Sab SH3-domain binding protein 5 (BTK-associated)          | NM_011894.2      |
| 22 | Gene Mettl6  | Mettl6, AI467 methyltransferase like 6                               | NM_025907.3      |
| 22 | Gene Eaf1    | 4933403C17Ri ELL associated factor 1                                 | NM_028932.4      |
| 31 | Gene Ankrd28 | AI604979, KIA ankyrin repeat domain 28                               | NM_001024604.2   |
| 32 | Gene Msmb    | PIP, Msmb, PSI beta-microseminoprotein                               | NM_020597.3      |
| 32 | Gene Ncoa4   | Ncoa4, 44324 nuclear receptor coactivator 4                          | NM_001033988.1   |
| 37 | Gene Timm23  | Timm23, MGC translocase of inner mitochondrial membrane 23           | NM_016897.3      |
| 37 | Gene Parg    | AI413217, Par poly (ADP-ribose) glycohydrolase                       | NM_011960.2      |
| 27 | Gene Vstm4   | E130203B14Ri V-set and transmembrane domain containing 4             | NM_178791.4      |
| 25 | Gene Arhgap2 | B230341L19Ri Rho GTPase activating protein 22                        | NM_153800.4      |

|    |              |                                                                       |                  |
|----|--------------|-----------------------------------------------------------------------|------------------|
| 24 | Gene Mapk8   | SAPK1, JNK, M mitogen-activated protein kinase 8                      | NM_016700.4      |
| 28 | Gene Fam35a  | Fam35a, 3110 family with sequence similarity 35, member A             | NM_029389.2      |
| 28 | Gene Glud1   | Glud, Gdh-X, A glutamate dehydrogenase 1                              | NM_008133.4      |
| 19 | Gene Fam25c  | Fam25, 22000 family with sequence similarity 25, member C             | NM_183278.2      |
| 19 | Gene Sncg    | C79089, Sncg, synuclein, gamma                                        | NM_011430.3      |
| 22 | Gene Bmpr1a  | 1110037122Rik bone morphogenetic protein receptor, type 1A            | NM_009758.4      |
| 22 | Gene 9230112 | 9230112D13Ri RIKEN cDNA 9230112D13 gene                               | NM_030062.1      |
| 18 | Gene Ldb3    | MGC118603, LIM domain binding 3                                       | NM_001039071.2   |
| 26 | Gene Wapal   | KIAA0261, 241 wings apart-like homolog (Drosophila)                   | NM_001004436.3   |
| 17 | Gene Nrg3    | ska, Nrg3 neuregulin 3                                                | NM_001190187.1   |
| 27 | Gene Txndc16 | C77647, 57304 thioredoxin domain containing 16                        | NM_172597.2      |
| 27 | Gene Gpr137c | Gpr137c, 6330 G protein-coupled receptor 137C                         | NM_027518.2      |
| 20 | Gene Ero1l   | Ero1l                                                                 | NM_015774.3      |
| 19 | Gene Psmc6   | Psmc6, A14510 proteasome (prosome, macropain) 26S subunit, ATP        | NM_025959.3      |
| 25 | Gene Ddhd1   | 9630061G18Ri DDHD domain containing 1                                 | NM_001039106.2   |
| 25 | Gene Mir5131 | Mir5131, mu-r microRNA 5131                                           | NR_039593.1      |
| 25 | Gene A530076 | A530076I17Ri RIKEN cDNA A530076I17 gene                               | XR_106850.1, XR_ |
| 24 | Gene Cnih    | Cnih, 0610007.cornichon homolog (Drosophila)                          | NM_009919.2      |
| 27 | Gene Gmfb    | AI851627, 311 glia maturation factor, beta                            | NM_022023.2      |
| 27 | Gene Gm1010  | Gm10101, ENS predicted gene 10101                                     | XR_141242.1      |
| 27 | Gene Cgrrf1  | 1110038G02Ri cell growth regulator with ring finger domain 1          | NM_026832.3      |
| 37 | Gene Samd4   | Samd4a, Smau sterile alpha motif domain containing 4                  | NM_001037221.2   |
| 18 | Gene Gch1    | Gch1, GTP-CH, GTP cyclohydrolase 1                                    | NM_008102.3      |
| 31 | Gene Atg14   | KIAA0831, Atg autophagy related 14                                    | NM_172599.4      |
| 31 | Gene Gm6616  | Gm6616, EG62 small nuclear ribonucleoprotein polypeptide F pseudogene |                  |
| 25 | Gene Peli2   | BB129927, Pel pellino 2                                               | NM_033602.2      |
| 28 | Gene Tmem26  | Tmem260, 593 transmembrane protein 260                                | NM_172600.3      |
| 35 | Gene Exoc5   | Gm76, PRO19: exocyst complex component 5                              | NM_207214.3      |
| 35 | Gene Ap5m1   | 4932432K03Ri adaptor-related protein complex 5, mu 1 subunit          | NM_144535.4      |
| 31 | Gene Naa30   | AI447922, AW N(alpha)-acetyltransferase 30, NatC catalytic subunit    | NM_001081430.1   |
| 32 | Gene Osgp    | Osgp, 1500010-sialoglycoprotein endopeptidase                         | NM_133676.2      |
| 32 | Gene Apex1   | Apex, Apex1, A purinic/aprimidinic endonuclease 1                     | NM_009687.2      |
| 32 | Gene Tmem55  | Tmem55b, M3 transmembrane protein 55b                                 | NM_001033271.4   |
| 22 | Gene Arhgef4 | Arhgef40, Solo Rho guanine nucleotide exchange factor (GEF) 40        | NM_198249.4, NM  |
| 22 | Gene Gm1661  | Gm16617 predicted gene, 16617                                         | NR_045728.1      |
| 26 | Gene Supt16  | Spt16, Supt16l suppressor of Ty 16                                    | NM_033618.3      |
| 26 | Gene Chd8    | mKIAA1564, D chromodomain helicase DNA binding protein 8              | NM_201637.2      |
| 25 | Gene Tox4    | A630040M18, TOX high mobility group box family member 4               | NM_023434.3      |
| 25 | Gene Mettl3  | Mettl3, 23100: methyltransferase like 3                               | NM_019721.2      |
| 25 | Gene Sall2   | AI225809, p15 sal-like 2 (Drosophila)                                 | NM_001244916.1   |
| 36 | Gene Mrpl52  | Mrpl52, 11100 mitochondrial ribosomal protein L52                     | NM_026851.2      |
| 36 | Gene Mmp14   | MT1-MMP, M matrix metalloproteinase 14 (membrane-inserted)            | NM_008608.3      |
| 29 | Gene Lrp10   | Lrp9, Lrp10 low-density lipoprotein receptor-related protein 10       | NM_022993.3      |
| 39 | Gene Haus4   | Haus4, AU016: HAUS augmin-like complex, subunit 4                     | NM_145462.2      |
| 45 | Gene Ajuba   | Ajuba, Jub ajuba LIM protein                                          | NM_010590.5      |
| 45 | Gene 4931414 | 4931414P19Ri RIKEN cDNA 4931414P19 gene                               | NM_028890.2      |
| 35 | Gene Acin1   | 2610036I19Ri apoptotic chromatin condensation inducer 1               | NM_019567.3, NM  |

|    |                                                                                       |                 |
|----|---------------------------------------------------------------------------------------|-----------------|
| 35 | Gene 1700123MNCb-2990, 1 RIKEN cDNA 1700123O20 gene                                   | NM_021437.2     |
| 35 | Gene LOC101056084 uncharacterized LOC101056084                                        | XM_003945547.1  |
| 34 | Gene Ppp1r3e AW049239, Pp protein phosphatase 1, regulatory (inhibitor) subunit       | NM_001167908.1  |
| 34 | Gene Bcl2l2 c98, AW04883 BCL2-like 2                                                  | NM_007537.1     |
| 16 | Gene Pabpn1 Pabpn1, Pabp poly(A) binding protein, nuclear 1                           | NM_019402.2     |
| 35 | Gene Slc22a17 1700094C23Ri solute carrier family 22 (organic cation transporter),     | NM_021551.4     |
| 39 | Gene Efs Efs embryonal Fyn-associated substrate                                       | NM_010112.4     |
| 39 | Gene Il25 IL-17e, IL-17E, interleukin 25                                              | NM_080729.3     |
| 39 | Gene Cmtm5 2900052H21Ri CKLF-like MARVEL transmembrane domain containing              | NM_026066.2, NM |
| 17 | Gene Zfhx2 ZFH-5, Zfhx2 zinc finger homeobox 2                                        | NM_001039198.1  |
| 17 | Gene Zfhx2as Zfhx2as zinc finger homeobox 2, antisense                                | NR_004444.2     |
| 18 | Gene Thtpa MGC38198, Th thiamine triphosphatase                                       | NM_153083.5     |
| 28 | Gene Ap1g2 G2ad, Ap1g2, I adaptor protein complex AP-1, gamma 2 subunit               | NM_007455.4     |
| 28 | Gene Jph4 Jph4, JP-4, JPH junctophilin 4                                              | NM_177049.5     |
| 23 | Gene Dhrr4 NDRD, Dhrr4, I dehydrogenase/reductase (SDR family) member 4               | NM_001037938.2  |
| 23 | Gene Lrrc16b mFLJ00240, Lr leucine rich repeat containing 16B                         | NM_001024645.1  |
| 25 | Gene Psme1 Psme1, MGC1: proteasome (prosome, macropain) 28 subunit, alpha             | NM_011189.1     |
| 25 | Gene Emc9 Fam158a, Cgi112, 1500005A01Rik, Emc9                                        | NM_033146.1     |
| 25 | Gene Psme2 Psme2, A1788 proteasome (prosome, macropain) 28 subunit, beta              | NM_011190.3, NM |
| 25 | Gene Rnf31 Rnf31, AL0332 ring finger protein 31                                       | NM_194346.2     |
| 27 | Gene Rec8 mre1, Rec8, A REC8 homolog (yeast)                                          | NM_020002.3     |
| 40 | Gene Ipo4 RanBP4, Imp4: importin 4                                                    | NM_024267.6     |
| 40 | Gene Tm9sf1 MP70, A18934: transmembrane 9 superfamily member 1                        | NM_028780.3     |
| 40 | Gene Tssk4 4933424F08Ri testis-specific serine kinase 4                               | NM_001253888.1  |
| 21 | Gene Nedd8 Nedd8, Rub1 neural precursor cell expressed, developmentally downregulated | NM_008683.3     |
| 21 | Gene Gmpr2 1810008P16Ri guanosine monophosphate reductase 2                           | NM_177992.2     |
| 21 | Gene Tinf2 Tinf2, Tin2, A VTerf1 (TRF1)-interacting nuclear factor 2                  | NM_145705.3     |
| 27 | Gene Tgm1 Tgm1, 231000: transglutaminase 1, K polypeptide                             | NM_019984.3, NM |
| 27 | Gene Rabggta Rabggta, gm Rab geranylgeranyl transferase, a subunit                    | NM_019519.2     |
| 27 | Gene Dhrr1 D14Ert484e, dehydrogenase/reductase (SDR family) member 1                  | NM_026819.3     |
| 27 | Gene Nop9 2610027L16Ri NOP9 nucleolar protein                                         | NM_026403.3     |
| 27 | Gene Cideb Cideb, CIDE-B, cell death-inducing DNA fragmentation factor, alpha         | NM_009894.3     |
| 19 | Gene Nynrin KIAA1305, C80 NYN domain and retroviral integrase containing              | NM_001040072.1  |
| 23 | Gene Cenpj Gm81, MGC10 centromere protein J                                           | NM_001014996.2  |
| 23 | Gene Parp4 PH5P, Adprt1, poly (ADP-ribose) polymerase family, member 4                | NM_001145978.2  |
| 29 | Gene Pspc1 A1327109, A14: paraspeckle protein 1                                       | NM_025682.3     |
| 22 | Gene Zmym2 MGC51607, 5 zinc finger, MYM-type 2                                        | NM_029498.3     |
| 28 | Gene Gjb2 A1325222, Cx2 gap junction protein, beta 2                                  | NM_008125.3     |
| 27 | Gene Ift88 flexo, orpk, fxc intraflagellar transport 88                               | NM_009376.2     |
| 21 | Gene Lats2 AW228608, 49 large tumor suppressor 2                                      | NM_015771.2, NM |
| 35 | Gene Ska3 F630043A04Ri spindle and kinetochore associated complex subunit             | NM_198605.3     |
| 35 | Gene Mrp63 AV005697, Mr mitochondrial ribosomal protein 63                            | NM_026401.2     |
| 35 | Gene Zdhhc20 A1448102, HK1 zinc finger, DHHC domain containing 20                     | NM_029492.4     |
| 22 | Gene Rcbtb1 Rcbtb1, 54304 regulator of chromosome condensation (RCC1) and             | NM_027764.2     |
| 28 | Gene Cdad1 2310010M10R cytidine and dCMP deaminase domain containing 1                | NM_001168535.1  |
| 26 | Gene Shisa2 MAd2, 943005 shisa homolog 2 (Xenopus laevis)                             | NM_145463.5     |
| 34 | Gene Nupl1 1700017F11Ri nucleoporin like 1                                            | NM_170591.1     |

|    |              |                                                                     |                 |
|----|--------------|---------------------------------------------------------------------|-----------------|
| 31 | Gene Spata13 | mFLJ00298, Sp spermatogenesis associated 13                         | NM_001033272.1  |
| 27 | Gene Sacs    | E130115J16Rik saccin                                                | NM_172809.3     |
| 16 | Gene Kpna3   | Kpna3, IPOA4 karyopherin (importin) alpha 3                         | NM_008466.5     |
| 21 | Gene Trim13  | 3110001L12Rik tripartite motif-containing 13                        | NM_023233.3, NM |
| 31 | Gene Dleu2   | AI788824, Gm: deleted in lymphocytic leukemia, 2                    | NR_028264.1     |
| 21 | Gene Kcnrg   | Gm745, E0300 potassium channel regulator                            | NM_206974.1, NM |
| 22 | Gene Dleu7   | MGC47306, BC deleted in lymphocytic leukemia, 7                     | NM_173419.2     |
| 26 | Gene Rnaseh2 | 1110019N06Ri ribonuclease H2, subunit B                             | NM_026001.2     |
| 28 | Gene Fam124i | EG629059, Far family with sequence similarity 124, member A         | NM_001243857.1  |
| 23 | Gene Ints6   | Ints6, Notch2l, integrator complex subunit 6                        | NM_008715.2     |
| 27 | Gene 493144C | 4931440J10Rik RIKEN cDNA 4931440J10 gene                            | NR_045503.1     |
| 27 | Gene Wdfy2   | 5830485M08, WD repeat and FYVE domain containing 2                  | NM_175546.4     |
| 54 | Gene Gata4   | Gata4, Gata-4 GATA binding protein 4                                | NM_008092.3     |
| 27 | Gene Mtmr9   | mMTMH3, MT myotubularin related protein 9                           | NM_177594.1     |
| 19 | Gene Xkr6    | BC024502, XR(X Kell blood group precursor related family member     | NM_173393.2     |
| 30 | Gene Pinx1   | 2210403I16Rik PIN2/TERF1 interacting, telomerase inhibitor 1        | NM_028228.3     |
| 33 | Gene Extl3   | 2900009G18Ri exostoses (multiple)-like 3                            | NM_018788.3     |
| 34 | Gene Zfp395  | BC053701, Gm zinc finger protein 395                                | NM_199029.2     |
| 28 | Gene Esco2   | Esco2, 241000 establishment of cohesion 1 homolog 2 (S. cerevisia   | NM_028039.2     |
| 28 | Gene Ccdc25  | NSrp70, Ccdc2 coiled-coil domain containing 25                      | NM_145944.4     |
| 44 | Gene 1700001 | 1700001G11Ri RIKEN cDNA 1700001G11 gene                             | NR_038077.1     |
| 44 | Gene Trim35  | AW046487, 07 tripartite motif-containing 35                         | NM_029979.3     |
| 27 | Gene Bnip3l  | C86132, Bnip3 BCL2/adenovirus E1B interacting protein 3-like        | NM_009761.3     |
| 41 | Gene Ppp2r2a | mKIAA1541, Pp protein phosphatase 2 (formerly 2A), regulatory sub   | NM_028032.3, NM |
| 20 | Gene Ebf2    | D14Ggc1e, Mn early B cell factor 2                                  | NM_010095.5     |
| 25 | Gene Dock5   | rlc, E130320D1 dedicator of cytokinesis 5                           | NM_177780.3     |
| 22 | Gene 1700092 | 1700092C10Ri RIKEN cDNA 1700092C10 gene                             | NR_045931.1     |
| 22 | Gene Nkx2-6  | Tix, Nkx2-6, ANK2 transcription factor related, locus 6 (Drosophila | NM_010920.2     |
| 27 | Gene R3hcc1  | R3hcc1, AA407 R3H domain and coiled-coil containing 1               | NM_001146012.1  |
| 31 | Gene Chmp7   | AI450338, 4930596K11Rik, 6330407G04Rik, Chmp7, AW550775, M          | NM_134078.4     |
| 20 | Gene Egr3    | Egr3, Pilot, MGe early growth response 3                            | NM_018781.2     |
| 24 | Gene 2610301 | MGC7730, 261 RIKEN cDNA 2610301G19 gene                             | NM_146055.3     |
| 24 | Gene 9930012 | 9930012K11Ri RIKEN cDNA 9930012K11 gene                             | NM_001004155.2  |
| 24 | Gene Pdlim2  | 4732462F18Ri PDZ and LIM domain 2                                   | NM_001253736.1  |
| 19 | Gene Ppp3cc  | Calnc, Ppp3cc protein phosphatase 3, catalytic subunit, gamma iso   | NM_008915.2     |
| 31 | Gene Polr3d  | TSBN51, 28104 polymerase (RNA) III (DNA directed) polypeptide D     | NM_025945.3, NM |
| 31 | Gene Mir320  | Mir320, mmu- microRNA 320                                           | NR_029802.1     |
| 28 | Gene Lgi3    | AW049851, Lg leucine-rich repeat LGI family, member 3               | NM_145219.4     |
| 28 | Gene Reep4   | 2700029E10Ri receptor accessory protein 4                           | NM_180588.2     |
| 28 | Gene Hr      | rhino, ALUNC, hairless                                              | NM_021877.2     |
| 22 | Gene Fam160l | G430067P06Ri family with sequence similarity 160, member B2         | NM_194345.1     |
| 22 | Gene Epb4.9  | Epb49, AI3254 erythrocyte protein band 4.9                          | NM_001252662.1, |
| 15 | Gene Xpo7    | mKIAA0745, B exportin 7                                             | NM_023045.2     |
| 15 | Gene Dok2    | DokR, Dok2, Fr docking protein 2                                    | NM_010071.2     |
| 19 | Gene Fndc3a  | Fndc3, F73001 fibronectin type III domain containing 3A             | NM_207636.2     |
| 20 | Gene Rcbtb2  | RC/BTB2, AW2 regulator of chromosome condensation (RCC1) and        | NM_134083.4, NM |
| 21 | Gene Rb1     | Rb, Rb1, pRb, Iretinoblastoma 1                                     | NM_009029.2     |

|    |               |                                                                     |                  |
|----|---------------|---------------------------------------------------------------------|------------------|
| 32 | Gene Itm2b    | Itm2b, Bri2, D1 integral membrane protein 2B                        | NM_008410.2      |
| 32 | Gene Gm2029   | Gm20290 predicted gene, 20290                                       | XR_141220.1, XR_ |
| 23 | Gene Esd      | Es10, sid478, E esterase D/formylglutathione hydrolase              | NM_016903.4      |
| 27 | Gene Lrch1    | AI552548, 483 leucine-rich repeats and calponin homology (CH) do    | NM_001033439.3,  |
| 22 | Gene Cpb2     | MGC107573, A carboxypeptidase B2 (plasma)                           | NM_019775.3      |
| 22 | Gene Zc3h13   | C87618, 49305 zinc finger CCCH type containing 13                   | NM_026083.2      |
| 32 | Gene Cog3     | E430004N23, (component of oligomeric golgi complex 3                | NM_177381.3      |
| 32 | Gene Slc25a30 | Slc25a30, AV2: solute carrier family 25, member 30                  | NM_026232.3      |
| 26 | Gene Gm4285   | Gm4285 predicted gene 4285                                          | NR_045294.1      |
| 26 | Gene Tpt1     | TCTP, Tpt1, Trt tumor protein, translationally-controlled 1         | NM_009429.3      |
| 26 | Gene Snora31  | MBI-161, Snor. small nucleolar RNA, H/ACA box 31                    | NR_028481.1      |
| 20 | Gene Gtf2f2   | 1110031C13Ri general transcription factor IIF, polypeptide 2        | NM_026816.3      |
| 28 | Gene 1200011  | 1200011118Rik, Kiaa1704                                             | NM_026177.3      |
| 28 | Gene Nufip1   | Nufip, Nufip1 nuclear fragile X mental retardation protein interact | NM_013745.5      |
| 27 | Gene Tsc22d1  | AW105905, A TSC22 domain family, member 1                           | NM_001177751.1   |
| 27 | Gene 4930444  | 4930444M15R RIKEN cDNA 4930444M15 gene                              | NR_045660.1      |
| 22 | Gene Serp2    | Serp2, MGC11 stress-associated endoplasmic reticulum protein fan    | NM_001160326.1,  |
| 23 | Gene Lacc1    | 9030625A04Ri laccase (multicopper oxidoreductase) domain conta      | NM_172488.2      |
| 23 | Gene Ccdc122  | Ccdc122, MGC coiled-coil domain containing 122                      | NM_175369.3      |
| 25 | Gene Enox1    | D230005D02R ecto-NOX disulfide-thiol exchanger 1                    | NM_001253759.1,  |
| 19 | Gene Dgkh     | D130015C16, Idiacylglycerol kinase, eta                             | NM_001081336.1,  |
| 29 | Gene Rgcc     | 1190002H23Ri regulator of cell cycle                                | NM_025427.2      |
| 33 | Gene Naa16    | Narg1l, Naa16, N(alpha)-acetyltransferase 16, NatA auxiliary subuni | NM_025832.2      |
| 33 | Gene Mtrf1    | MtRF-1, A830C mitochondrial translational release factor 1          | NM_145960.4      |
| 20 | Gene Zbtbd6   | EG432879, Zbt kelch repeat and BTB (POZ) domain containing 6        | NM_001034882.3   |
| 43 | Gene Wbp4     | AW545037, W WW domain binding protein 4                             | NM_018765.3      |
| 43 | Gene Elf1     | p70, Sts1, mElE74-like factor 1                                     | NM_007920.3      |
| 34 | Gene Pcdh8    | Papc, Pcdh8, 1 protocadherin 8                                      | NM_021543.4, NM  |
| 33 | Gene Tdrd3    | 6720468N18, Tudor domain containing 3                               | NM_172605.3, NM  |
| 39 | Gene Mzt1     | Mzt1, 2410125 mitotic spindle organizing protein 1                  | NM_175245.4      |
| 39 | Gene Bora     | Bora, 6720463 bora, aurora kinase A activator                       | NM_175265.4      |
| 28 | Gene Dis3     | 2810028N01Ri DIS3 mitotic control homolog (S. cerevisiae)           | NM_028315.2      |
| 28 | Gene Pibf1    | 4933439E17Ri progesterone immunomodulatory binding factor 1         | NM_029320.2, NM  |
| 24 | Gene Klf5     | Bteb2, CKLF, Ik Kruppel-like factor 5                               | NM_009769.4      |
| 30 | Gene Tbc1d4   | AV295684, A9: TBC1 domain family, member 4                          | NM_001081278.2   |
| 30 | Gene Uchl3    | Uchl3 ubiquitin carboxyl-terminal esterase L3 (ubiquitin th         | NM_016723.2      |
| 30 | Gene Kctd12   | Kctd12, AW53: potassium channel tetramerisation domain containi     | NM_177715.4      |
| 30 | Gene Mir5130  | mmu-mir-5130 microRNA 5130                                          | NR_039592.1      |
| 30 | Gene 4933432  | 4933432I03Rik RIKEN cDNA 4933432I03 gene                            | NR_045657.1      |
| 29 | Gene Cln5     | A730075N08R ceroid-lipofuscinosis, neuronal 5                       | NM_001033242.1   |
| 29 | Gene Fbxl3    | FBK, AW21296 F-box and leucine-rich repeat protein 3                | NM_015822.2      |
| 30 | Gene Mycbp2   | AU023734, C1: MYC binding protein 2                                 | NM_207215.2      |
| 23 | Gene Rbm26    | Se70-2, C8622 RNA binding motif protein 26                          | NM_134077.4      |
| 21 | Gene Spry2    | sprouty2, Spry sprouty homolog 2 (Drosophila)                       | NM_011897.3      |
| 17 | Gene Trim52   | 4921513B05Ri tripartite motif-containing 52                         | NM_198601.3      |
| 21 | Gene Gpc6     | 6720429C22Ri glypican 6                                             | NM_011821.2, NM  |
| 21 | Gene Gm1984   | Gm19845 predicted gene, 19845                                       | XR_141230.1      |

|    |                 |                                                                          |                  |
|----|-----------------|--------------------------------------------------------------------------|------------------|
| 31 | Gene Tgds       | AI648925, 261 TDP-glucose 4,6-dehydratase                                | NM_029578.3      |
| 31 | Gene Gpr180     | ltr, E130016I2: G protein-coupled receptor 180                           | NM_021434.5      |
| 23 | Gene Abcc4      | Abcc4, D63004: ATP-binding cassette, sub-family C (CFTR/MRP), member 4   | NM_001033336.3,  |
| 39 | Gene Dnajc3     | Prkri, AA40898: DnaJ (Hsp40) homolog, subfamily C, member 3              | NM_008929.3      |
| 33 | Gene Ugg2       | 1810064L21Ril UDP-glucose glycoprotein glucosyltransferase 2             | NM_001081252.2   |
| 27 | Gene Hs6st3     | 6OST3, MGC14: heparan sulfate 6-O-sulfotransferase 3                     | NM_015820.3      |
| 23 | Gene Rap2a      | Rap2a, 583046: RAS related protein 2a                                    | NM_029519.3      |
| 30 | Gene Farp1      | BC030329, Cd: FERM, RhoGEF (Arhgef) and pleckstrin domain protein 1      | NM_134082.3      |
| 25 | Gene Stk24      | C76483, MGC6330, 1810013H02Rik, Stk24, STE20, MST-3, Mst3                | NM_145465.2      |
| 21 | Gene Ubac2      | AW554959, 11 ubiquitin associated domain containing 2                    | NM_026861.2      |
| 26 | Gene A330035    | A330035P11Ri RIKEN cDNA A330035P11 gene                                  | NR_015586.2      |
| 26 | Gene Tm9sf2     | P76, D14Ertd6 transmembrane 9 superfamily member 2                       | NM_080556.3      |
| 23 | Gene Zic5       | Zic5, 1700049I zinc finger protein of the cerebellum 5                   | NM_022987.3      |
| 23 | Gene 2610035    | 2610035F20Ril RIKEN cDNA 2610035F20 gene                                 | NR_045046.1      |
| 23 | Gene Zic2       | HPE5, Zic2, Ku zinc finger protein of the cerebellum 2                   | NM_009574.3      |
| 26 | Gene Tmtc4      | 5730419O14Ri transmembrane and tetratricopeptide repeat containing 4     | NM_028651.2      |
| 25 | Gene Nalcn      | AI849508, Vgc sodium leak channel, non-selective                         | NM_177393.4      |
| 15 | Gene Fgf14      | MGC129318, r fibroblast growth factor 14                                 | NM_010201.4, NM  |
| 22 | Gene Fbxo4      | 1700096C12Ri F-box protein 4                                             | NM_134099.2      |
| 28 | Gene AW5498     | AI195826, AW expressed sequence AW549877                                 | NM_145930.2      |
| 28 | Gene A630020A06 | uncharacterized A630020A06                                               | NR_045740.1      |
| 28 | Gene Card6      | Card6, D7300C caspase recruitment domain family, member 6                | NM_001163138.1   |
| 28 | Gene Rpl37      | 3110005M08R ribosomal protein L37                                        | NM_026069.3      |
| 28 | Gene Snord72    | MBII-240, Sno: small nucleolar RNA, C/D box 72                           | NR_028091.1      |
| 22 | Gene Prkaa1     | AMPKalpha1, I protein kinase, AMP-activated, alpha 1 catalytic subunit 1 | NM_001013367.3   |
| 20 | Gene Egflam     | 5930412K08, EGF-like, fibronectin type III and laminin G domains         | NM_178748.5      |
| 26 | Gene Gdnf       | AI385739, Gdn: glial cell line derived neurotrophic factor               | NM_010275.2      |
| 20 | Gene Nipbl      | 4921518A06Ri Nipped-B homolog (Drosophila)                               | NM_027707.2, NM  |
| 23 | Gene Skp2       | MGC116668, M-phase kinase-associated protein 2 (p45)                     | NM_013787.2, NM  |
| 23 | Gene Lmbrd2     | 9930036E21Ri LMBR1 domain containing 2                                   | NM_177178.3      |
| 24 | Gene Rai14      | Ankycorbin, 17 retinoic acid induced 14                                  | NM_030690.3, NM  |
| 24 | Gene 4930556    | 1700009D01Ri RIKEN cDNA 4930556M19 gene                                  | NR_045063.1, NR_ |
| 19 | Gene Slc45a2    | bls, uw, blanc: solute carrier family 45, member 2                       | NM_053077.3      |
| 19 | Gene Rxfp3      | BC053073, Rxf relaxin family peptide receptor 3                          | NM_178717.3      |
| 23 | Gene Npr3       | stri, Npr3, C81 natriuretic peptide receptor 3                           | NM_008728.2, NM  |
| 23 | Gene Gm5144     | Gm5144 predicted gene 5144                                               | XR_105665.3, XR_ |
| 38 | Gene Sub1       | Pc4, AI842364, SUB1 homolog (S. cerevisiae)                              | NM_011294.3      |
| 24 | Gene Zfr        | C920030H05Ri zinc finger RNA binding protein                             | NM_011767.2      |
| 33 | Gene Golph3     | AW413496, 57 golgi phosphoprotein 3                                      | NM_025673.2      |
| 17 | Gene Cdh6       | cad6, Cdh6, K-cadherin 6                                                 | NM_007666.3      |
| 28 | Gene Basp1      | Ckap3, CAP-23 brain abundant, membrane attached signal protein           | NM_027395.2      |
| 28 | Gene Gm5468     | EG432939, Gr predicted gene 5468                                         | NR_027376.1      |
| 37 | Gene Myo10      | AW048724, M myosin X                                                     | NM_019472.2      |
| 34 | Gene Zfp622     | Znf622, 11100 zinc finger protein 622                                    | NM_144523.2      |
| 29 | Gene Fbxl7      | MGC102204, F-box and leucine-rich repeat protein 7                       | NM_176959.3      |
| 26 | Gene Trio       | AA408740, 67: triple functional domain (PTPRF interacting)               | NM_001081302.1   |
| 25 | Gene Ankrd33    | 5730557B15Ri ankyrin repeat domain 33B                                   | NM_001164441.1   |



|    |               |                                                                   |                 |
|----|---------------|-------------------------------------------------------------------|-----------------|
| 23 | Gene March6   | 3830408G03, r membrane-associated ring finger (C3HC4) 6           | NM_172606.2     |
| 35 | Gene Cct5     | Ccte, mKIAA00C chaperonin containing Tcp1, subunit 5 (epsilon)    | NM_007637.2     |
| 35 | Gene Fam173l  | AA987072, A9: family with sequence similarity 173, member B       | NM_026546.3     |
| 28 | Gene 0610007  | 0610007N19Ri RIKEN cDNA 0610007N19                                | NR_038186.1     |
| 28 | Gene Snord12  | 0610007N19Ri small nucleolar RNA, C/D box 123                     | NR_028575.2     |
| 28 | Gene Sema5a   | 9130201M22R sema domain, seven thrombospondin repeats (type       | NM_009154.2     |
| 19 | Gene Tspyl5   | E130308C19Ri testis-specific protein, Y-encoded-like 5            | NM_001085421.1  |
| 23 | Gene Mtdh     | D8Bwg1112e, metadherin                                            | NM_026002.4     |
| 30 | Gene Matn2    | Crtm2, Matn2, matrilin 2                                          | NM_016762.2     |
| 30 | Gene Rpl30    | Rpl30, MGC10 ribosomal protein L30                                | NM_009083.4, NM |
| 30 | Gene BC03047  | MGC117582, M cDNA sequence BC030476                               | NM_173421.2     |
| 24 | Gene Hrsp12   | HR12, Hrsp12, heat-responsive protein 12                          | NM_008287.3     |
| 24 | Gene Pop1     | 4932434G09Ri processing of precursor 1, ribonuclease P/MRP fami   | NM_152894.2, NM |
| 26 | Gene Nipal2   | Npal2, 933016 NIPA-like domain containing 2                       | NM_145469.5     |
| 26 | Gene 4930413  | 4930413F20Ri RIKEN cDNA 4930413F20 gene                           | NR_045883.2     |
| 27 | Gene Kcns2    | E130006J24Ri K+ voltage-gated channel, subfamily S, 2             | NM_181317.3     |
| 21 | Gene Stk3     | MST, Mst2, 0610042I06Ri k, mess1, Stk3, Ste20, Mst3               | NM_019635.2     |
| 30 | Gene Osr2     | Osr2B, Osr2, 5430409I15Ri k, Osr2A                                | NM_054049.2     |
| 25 | Gene BC04860  | BC048602 cDNA sequence BC048602                                   | NR_045280.1     |
| 31 | Gene Vps13b   | 2310042E16Ri vacuolar protein sorting 13B (yeast)                 | NM_177151.3     |
| 27 | Gene Cox6c    | Cox6c cytochrome c oxidase subunit VIc                            | NM_053071.2     |
| 18 | Gene Spag1    | Spag1, tpis sperm associated antigen 1                            | NM_012031.3     |
| 26 | Gene Rnf19a   | Rnf19a, UIP11 ring finger protein 19A                             | NM_013923.2     |
| 28 | Gene Pabpc1   | Pabpc1, PABP, poly(A) binding protein, cytoplasmic 1              | NM_008774.3     |
| 30 | Gene Ywhaz    | AI596267, AUC tyrosine 3-monooxygenase/tryptophan 5-monooxyg      | NM_011740.3, NM |
| 28 | Gene Ncald    | D030020D09R neurocalcin delta                                     | NM_134094.4, NM |
| 28 | Gene Ubr5     | C77315, mKIAA ubiquitin protein ligase E3 component n-recognin 5  | NM_001081359.2, |
| 35 | Gene Azin1    | Oazi, 1700085 antizyme inhibitor 1                                | NM_018745.5, NM |
| 25 | Gene Atp6v1c  | U13839, Atp6v ATPase, H+ transporting, lysosomal V1 subunit C1    | NM_025494.3     |
| 35 | Gene Slc25a32 | 2610043O12Ri solute carrier family 25, member 32                  | NM_172402.3     |
| 35 | Gene Dcaf13   | Wdsof1, Dcaf1 DDB1 and CUL4 associated factor 13                  | NM_198606.2     |
| 18 | Gene Rims2    | Rab3ip2, 2810 regulating synaptic membrane exocytosis 2           | NM_001256382.1  |
| 18 | Gene Lrp12    | Lrp12, AI8488 low density lipoprotein-related protein 12          | NM_172814.3     |
| 20 | Gene Zfp2     | FOG-2, Zfp2, zinc finger protein, multitype 2                     | NM_011766.5     |
| 28 | Gene Oxr1     | MGC103081, Oxidation resistance 1                                 | NM_130885.2, NM |
| 26 | Gene Nudcd1   | AW556235, NudC domain containing 1                                | NM_026149.4, NM |
| 26 | Gene Eny2     | DC6, 1810057I enhancer of yellow 2 homolog (Drosophila)           | NM_175009.3     |
| 29 | Gene Ebag9    | AI835379, Rca: estrogen receptor-binding fragment-associated gene | NM_019480.4     |
| 19 | Gene Rad21    | mKIAA0078, R: RAD21 homolog (S. pombe)                            | NM_009009.4     |
| 21 | Gene Ext1     | Ext1, AA40902 exostoses (multiple) 1                              | NM_010162.2     |
| 39 | Gene Dscc1    | MGC151212, M defective in sister chromatid cohesion 1 homolog (S  | NM_183089.2     |
| 39 | Gene Gm9920   | Gm9920, ENSM predicted gene 9920                                  | NR_045093.1     |
| 33 | Gene Deptor   | 9130412E02Ri DEP domain containing MTOR-interacting protein       | NM_145470.2, NM |
| 24 | Gene Mrpl13   | Mrpl13, 11100 mitochondrial ribosomal protein L13                 | NM_026759.3     |
| 24 | Gene Mtbp     | AI429604, Mtk Mdm2, transformed 3T3 cell double minute p53 bin    | NM_134092.3, NM |
| 19 | Gene Sntb1    | Sntb1                                                             | NM_016667.3     |
| 18 | Gene Zhx2     | mKIAA0854, R: zinc fingers and homeoboxes 2                       | NM_199449.2     |

|    |                                                                             |                  |
|----|-----------------------------------------------------------------------------|------------------|
| 36 | Gene 9130401A1849328, 913 RIKEN cDNA 9130401M01 gene                        | NM_029418.4      |
| 23 | Gene Zhx1 Zhx1, mKIAA41 zinc fingers and homeoboxes 1                       | NM_009572.3, NM  |
| 31 | Gene Atad2 Atad2, 261050 ATPase family, AAA domain containing 2             | NM_027435.2      |
| 31 | Gene Wdyhv1 Ntaq1, 241018 WDYHV motif containing 1                          | NM_029734.1      |
| 21 | Gene Fbxo32 Gm20361, atrc F-box protein 32                                  | NM_026346.3      |
| 22 | Gene Tmem65 4930438D12Ri transmembrane protein 65                           | NM_175212.4      |
| 22 | Gene Ube2d4 EG546638, Gr ubiquitin-conjugating enzyme E2D 4                 | XM_905852.4, XM  |
| 31 | Gene Rnf139 4930555P18Ri ring finger protein 139                            | NM_175226.4      |
| 31 | Gene Tatdn1 2310079P03Ri TatD DNase domain containing 1                     | NM_175151.4      |
| 25 | Gene Ndufb9 Ndufb9, 1190C NADH dehydrogenase (ubiquinone) 1 beta subcomp    | NM_023172.3      |
| 25 | Gene Mtss1 2310003N14Ri metastasis suppressor 1                             | NM_144800.2, NM  |
| 27 | Gene Sqle Sqle, A1323792 squalene epoxidase                                 | NM_009270.3      |
| 21 | Gene E430025 C76463, mKIAA RIKEN cDNA E430025E21 gene                       | NM_153548.2      |
| 21 | Gene Nsmce2 1110014D18Ri non-SMC element 2 homolog (MMS21, S. cerevisiae    | NM_026746.3, NM  |
| 29 | Gene Trib1 A530090O15Ri tribbles homolog 1 (Drosophila)                     | NM_144549.4      |
| 29 | Gene Fam84b D330050I23Ri family with sequence similarity 84, member B       | NM_001162926.1   |
| 29 | Gene 9930014 9930014A18Ri RIKEN cDNA 9930014A18 gene                        | NR_030696.1      |
| 27 | Gene Myc Nird, Myc2, Ni myelocytomatosis oncogene                           | NM_010849.4, NM  |
| 23 | Gene Asap1 AV239055, PAI ArfGAP with SH3 domain, ankyrin repeat and PH do   | NM_010026.2      |
| 31 | Gene Efr3a KIAA0143, mKIEFR3 homolog A (S. cerevisiae)                      | NM_133766.3      |
| 27 | Gene Phf20l1 E130113K22Ri PHD finger protein 20-like 1                      | NM_001081409.1   |
| 31 | Gene Ndrg1 PROXY1, HMSI N-myc downstream regulated gene 1                   | NM_008681.2      |
| 21 | Gene Trappc9 2900005P22Ri trafficking protein particle complex 9            | NM_180662.2, NM  |
| 21 | Gene Peg13 Peg13 paternally expressed 13                                    | NR_002864.1      |
| 34 | Gene Ago2 Gerp95, Gm10 argonaute RISC catalytic subunit 2                   | NM_153178.4      |
| 26 | Gene 170001C 1700010B13Ri RIKEN cDNA 1700010B13 gene                        | XR_106927.1, XR_ |
| 22 | Gene Jrk Jrk                                                                | NM_008415.6      |
| 22 | Gene 4933427 4933427E11Ri RIKEN cDNA 4933427E11 gene                        | NR_033197.1      |
| 22 | Gene Psca 2210408B04Ri prostate stem cell antigen                           | NM_028216.2      |
| 19 | Gene Zfp41 Zfp-41, CTfin9 zinc finger protein 41                            | NM_001044718.1,  |
| 38 | Gene Mafa RIPE3b1, Mafa v-maf musculoaponeurotic fibrosarcoma oncogene      | NM_194350.1      |
| 38 | Gene Zc3h3 Zc3h3, Smicl, Ezinc finger CCCH type containing 3                | NM_172121.1      |
| 30 | Gene Zfp623 A1847036, MG zinc finger protein 623                            | NM_030199.3      |
| 29 | Gene Scrib KIAA0147, A11 scribbled homolog (Drosophila)                     | NM_134089.1      |
| 42 | Gene Puf60 Puf60, SIAHBP poly-U binding splicing factor 60                  | NM_028364.2, NM  |
| 42 | Gene Nrbp2 MGC18994, Nr nuclear receptor binding protein 2                  | NM_144847.1      |
| 40 | Gene Eppk1 Eppk1, 623042 epiplakin 1                                        | NM_144848.2      |
| 28 | Gene Plec PLTN, AU042537, PCN, AA591047, Plec, Plec1, EBS1                  | NM_001163540.1   |
| 21 | Gene Mir1942 mmu-mir-1942 microRNA 1942                                     | NR_035463.1      |
| 24 | Gene Parp10 Parp10 poly (ADP-ribose) polymerase family, member 10           | NM_001163575.1,  |
| 21 | Gene Grina Lag, 1110025J glutamate receptor, ionotropic, N-methyl D-asparta | NM_023168.3      |
| 21 | Gene Exosc4 Rrp41, 150000 exosome component 4                               | NM_175399.4      |
| 28 | Gene Gpaa1 C80044, mGAA GPI anchor attachment protein 1                     | NM_010331.2      |
| 28 | Gene Cyc1 2610002H19Ri cytochrome c-1                                       | NM_025567.2      |
| 28 | Gene Sharpin cpdm, Sharpin SHANK-associated RH domain interacting protein   | NM_025340.2      |
| 28 | Gene Maf1 1110068E11Ri MAF1 homolog (S. cerevisiae)                         | NM_001164607.1   |
| 31 | Gene Fam203 D15Ert d741e, family with sequence similarity 203, member A     | NM_021555.2      |

|    |              |                                                                          |                  |
|----|--------------|--------------------------------------------------------------------------|------------------|
| 31 | Gene Tssk5   | 1700091F14Ri testis-specific serine kinase 5                             | NM_183099.2      |
| 25 | Gene Mroh1   | Heatr7a, D330 maestro heat-like repeat family member 1                   | NM_001162489.1   |
| 32 | Gene Bop1    | mKIAA0124, Ei block of proliferation 1                                   | NM_013481.1      |
| 25 | Gene Scx     | Scl, Scx, BB114 scleraxis                                                | NM_198885.3      |
| 32 | Gene Hsf1    | Hsf1, AA96018 heat shock factor 1                                        | NM_008296.2      |
| 24 | Gene Dgat1   | C75990, ARAT, diacylglycerol O-acyltransferase 1                         | NM_010046.2      |
| 26 | Gene Scrt1   | Scrt1 scratch homolog 1, zinc finger protein (Drosophila)                | NM_130893.3      |
| 38 | Gene Gm8140  | EG666504, Gr predicted gene 8140                                         | XM_982916.4, XM  |
| 38 | Gene Fbxl6   | Fbxl6, Fbl6, AU F-box and leucine-rich repeat protein 6                  | NM_013909.2      |
| 38 | Gene Slc52a2 | PAR2, GPCR, 2 solute carrier protein 52, member 2                        | NM_029643.3      |
| 25 | Gene Cyhr1   | Chrp, Cyhr1, 1: cysteine and histidine rich 1                            | NM_180962.1, NM  |
| 25 | Gene Kifc2   | Kifc2 kinesin family member C2                                           | NM_010630.2      |
| 22 | Gene Foxh1   | Foxh1, Fast1, F forkhead box H1                                          | NM_007989.3      |
| 22 | Gene Ppp1r16 | Mypt3, 29000 protein phosphatase 1, regulatory (inhibitor) subunit       | NM_033371.2      |
| 27 | Gene Mfsd3   | 2310010G13Ri major facilitator superfamily domain containing 3           | NM_027122.3      |
| 27 | Gene Recql4  | Recql4, RecQ4                                                            | NM_058214.3      |
| 27 | Gene Lrrc14  | E130306I01Ri leucine rich repeat containing 14                           | NM_145471.2      |
| 27 | Gene Lrrc24  | Lrrc24, 64304C leucine rich repeat containing 24                         | NM_198119.2      |
| 26 | Gene C030006 | C030006K11Ri RIKEN cDNA C030006K11 gene                                  | NM_176828.4, NM  |
| 26 | Gene Arhgap3 | AI843066, 953 Rho GTPase activating protein 39                           | NM_198420.2, NM  |
| 19 | Gene Zfp7    | KRAB20, mszf7 zinc finger protein 7                                      | NM_145916.2      |
| 50 | Gene Commd5  | Hcarg, AI8544C COMM domain containing 5                                  | NM_025536.2      |
| 50 | Gene Rpl8    | Rpl8 ribosomal protein L8                                                | NM_012053.2      |
| 50 | Gene Zfp647  | Znf250, Es492, zinc finger protein 647                                   | NM_172817.3, NM  |
| 24 | Gene Rbfox2  | Rbfox2, Hrnbp RNA binding protein, fox-1 homolog (C. elegans) 2          | NM_053104.5, NM  |
| 21 | Gene Apol8   | Apol8, Apol2, apolipoprotein L 8                                         | NM_001081970.1   |
| 39 | Gene Myh9    | D0Jmb2, Myhr myosin, heavy polypeptide 9, non-muscle                     | NM_022410.2      |
| 23 | Gene Foxred2 | D15Bwg0759e FAD-dependent oxidoreductase domain containing               | NM_001017983.2   |
| 38 | Gene Eif3d   | eIF3p66, Eif3s7 eukaryotic translation initiation factor 3, subunit D    | NM_018749.2      |
| 30 | Gene Cacng2  | stargazer, Cac calcium channel, voltage-dependent, gamma subunit         | NM_007583.2      |
| 23 | Gene Tex33   | Ean57, 170006 testis expressed 33                                        | NM_028522.1, NM  |
| 24 | Gene Tst     | Rhodanese, Ts thiosulfate sulfurtransferase, mitochondrial               | NM_009437.4      |
| 24 | Gene Mpst    | Mst, Mpst mercaptopyruvate sulfurtransferase                             | NM_138670.3, NM  |
| 26 | Gene Kctd17  | Kctd17, 29000 potassium channel tetramerisation domain containing        | NM_001081367.1   |
| 26 | Gene Tmprss6 | Tmprss6, 1300 transmembrane serine protease 6                            | NM_027902.2      |
| 18 | Gene Elfn2   | AW048948, 63 leucine rich repeat and fibronectin type III, extracellular | NM_183141.2      |
| 24 | Gene Cdc42ep | MSE55, Cdc42 CDC42 effector protein (Rho GTPase binding) 1               | NM_027219.3      |
| 24 | Gene Lgals2  | 2200008F12Ri lectin, galactose-binding, soluble 2                        | NM_025622.3      |
| 30 | Gene Gga1    | 4930406E12Ri golgi associated, gamma adaptin ear containing, ARI         | NM_145929.2      |
| 30 | Gene Gm1086  | ENSMUSG000 predicted gene 10866                                          | XR_141279.1      |
| 30 | Gene Sh3bp1  | 3BP-1, Sh3bp1 SH3-domain binding protein 1                               | NM_009164.2      |
| 26 | Gene Pdxp    | Pdxp, 1600027 pyridoxal (pyridoxine, vitamin B6) phosphatase             | NM_020271.3      |
| 26 | Gene Lgals1  | galectin-1, Lec lectin, galactose binding, soluble 1                     | NM_008495.2      |
| 26 | Gene Nol12   | Nol12, Nop25, nucleolar protein 12                                       | NM_133800.3      |
| 23 | Gene Triobp  | EST478828, Tri TRIO and F-actin binding protein                          | NM_138579.4, NM  |
| 40 | Gene Gm1775  | Gm17753 predicted gene, 17753                                            | XR_106938.2, XR_ |
| 40 | Gene H1f0    | MGC19309, H: H1 histone family, member 0                                 | NM_008197.3      |

|    |                   |                                                                        |                  |
|----|-------------------|------------------------------------------------------------------------|------------------|
| 40 | Gene Gcat         | Kbl, AI526977, glycine C-acetyltransferase (2-amino-3-ketobutyrate     | NM_013847.4, NM  |
| 27 | Gene Eif3l        | Eif3eip, Eif3ip, eukaryotic translation initiation factor 3, subunit L | NM_145139.2      |
| 28 | Gene Micall1      | 260, D15N2e, I microtubule associated monooxygenase, calponin a        | NM_177461.1      |
| 26 | Gene Sox10        | Dom, Sox10, SRY-box containing gene 10                                 | NM_011437.1      |
| 26 | Gene Gm1086       | Gm10863, ENS predicted gene 10863                                      | NR_029470.1      |
| 26 | Gene Maff         | Maff                                                                   | NM_010755.3      |
| 24 | Gene Tmem18       | 2610507A11, T transmembrane protein 184b                               | NM_172608.1, NM  |
| 20 | Gene Kcnj4        | IRK3, Kcnj4, Kc potassium inwardly-rectifying channel, subfamily J, I  | NM_008427.4      |
| 23 | Gene Kdelr3       | Kdelr3, AI1732 KDEL (Lys-Asp-Glu-Leu) endoplasmic reticulum prote      | NM_134090.2      |
| 26 | Gene Fam227       | 4933432B09Ri family with sequence similarity 227, member A             | NM_029407.1      |
| 26 | Gene Cby1         | PGEA14, 1110 (chibby homolog 1 (Drosophila)                            | NM_028634.3      |
| 32 | Gene Josd1        | MGC101975, J Josephin domain containing 1                              | NM_028792.3      |
| 32 | Gene LOC101055940 | uncharacterized LOC101055940                                           | XM_003945553.1   |
| 32 | Gene Gtpbp1       | Gtpbp1, AL022 GTP binding protein 1                                    | NM_013818.2      |
| 20 | Gene Sun2         | Sun2, AI55176 Sad1 and UNC84 domain containing 2                       | NM_194342.3, NM  |
| 20 | Gene Gm1657       | Gm16576 predicted gene 16576                                           | NR_045069.1      |
| 23 | Gene Npcd         | Cbx6-Nptxr, N neuronal pentraxin chromo domain                         | NM_001013360.2,  |
| 17 | Gene Nptxr        | AI785356, AI4 neuronal pentraxin receptor                              | NM_030689.4      |
| 23 | Gene Cbx6         | Cbx6 chromobox 6                                                       | NM_028763.3      |
| 23 | Gene Gm1085       | ENSMUSG000 (predicted gene 10856                                       | XR_141281.1      |
| 23 | Gene Pdgfb        | PDGF-B, Pdgfb platelet derived growth factor, B polypeptide            | NM_011057.3      |
| 23 | Gene Fam83f       | MGC27770, Fa family with sequence similarity 83, member F              | NM_145986.2      |
| 35 | Gene Tnrc6b       | D230019K20Ri trinucleotide repeat containing 6b                        | NM_144812.2, NM  |
| 23 | Gene Adsl         | Asl, Adsl, Adl                                                         | NM_009634.5      |
| 23 | Gene Sgsm3        | Rutbc3, BB175 small G protein signaling modulator 3                    | NM_134091.2      |
| 24 | Gene Mkl1         | AMKL, AI8528:MKL (megakaryoblastic leukemia)/myocardin-like 1          | NM_153049.2, NM  |
| 24 | Gene 4930483      | 4930483J18Ri RIKEN cDNA 4930483J18 gene                                | NR_015603.1      |
| 19 | Gene St13         | HIP, HOP, St13 suppression of tumorigenicity 13                        | NM_133726.2      |
| 19 | Gene Xpnpep3      | Xpnpep3, E43 (X-prolyl aminopeptidase (aminopeptidase P) 3, puta       | NM_177310.2      |
| 19 | Gene Dnajb7       | Dnajb7, 49334 DnaJ (Hsp40) homolog, subfamily B, member 7              | NM_021317.2      |
| 41 | Gene Ep300        | p300, Ep300, K E1A binding protein p300                                | NM_177821.6      |
| 23 | Gene L3mbtl2      | M4mbt, L3mbtl(3)mbt-like 2 (Drosophila)                                | NM_145993.4      |
| 23 | Gene Chadl        | AY100452, D9 chondroadherin-like                                       | NM_001164320.1   |
| 36 | Gene Rangap1      | C79654, Rang RAN GTPase activating protein 1                           | NM_001146174.1   |
| 26 | Gene Zc3h7b       | mKIAA1031, Z zinc finger CCCH type containing 7B                       | NM_001081016.1   |
| 31 | Gene Gm1759       | Gm17597 predicted gene, 17597                                          | XR_106942.1, XR_ |
| 31 | Gene Tef          | Tef, 2310028D thyrotroph embryonic factor                              | NM_153484.3, NM  |
| 30 | Gene Tob2         | AV071822, 49 transducer of ERBB2, 2                                    | NM_020507.3      |
| 30 | Gene Phf5a        | Phf5a, 111000 PHD finger protein 5A                                    | NM_026737.3      |
| 19 | Gene Polr3h       | 5031409G22Ri polymerase (RNA) III (DNA directed) polypeptide H         | NM_030229.4      |
| 31 | Gene Csdc2        | AI415250, Pip cold shock domain containing C2, RNA binding             | NM_145473.3      |
| 31 | Gene Pmm1         | Pmm1, C7761 phosphomannomutase 1                                       | NM_013872.3      |
| 28 | Gene Xrcc6        | G22p1, Xrcc6, X-ray repair complementing defective repair in Chin      | NM_010247.2      |
| 28 | Gene Nhp2l1       | Nhp2l1, Ssfa1, NHP2 non-histone chromosome protein 2-like 1 (S. c      | NM_011482.4      |
| 34 | Gene Mei1         | Mei1, mei1, 4 meiosis defective 1                                      | NM_028897.3      |
| 34 | Gene Ccdc134      | 2310042L06Ri coiled-coil domain containing 134                         | NM_172428.2      |
| 23 | Gene Srebf2       | SREBP2gc, AI6 sterol regulatory element binding factor 2               | NM_033218.1      |

|    |              |                                                                     |                  |
|----|--------------|---------------------------------------------------------------------|------------------|
| 40 | Gene Cenpm   | AI853711, Cen centromere protein M                                  | NM_025639.4, NM  |
| 40 | Gene 1500009 | 1500009C09Ri RIKEN cDNA 1500009C09 gene                             | NR_037697.1, NR_ |
| 31 | Gene Tcf20   | mKIAA0292, 2:transcription factor 20                                | NM_013836.3, NM  |
| 31 | Gene Tbrg3   | TB-11, Tbrg3 transforming growth factor beta regulated gene 3       | NR_027799.1      |
| 31 | Gene Gm2032  | Gm20324 predicted gene, 20324                                       | NR_045068.1      |
| 22 | Gene Serhl   | Serhl, 061000ε serine hydrolase-like                                | NM_023475.3      |
| 22 | Gene Rrp7a   | 1110014J01Ri ribosomal RNA processing 7 homolog A (S. cerevisia     | NM_029101.4      |
| 22 | Gene Poldip3 | mKIAA1649, C polymerase (DNA-directed), delta interacting protei    | NM_178627.3      |
| 23 | Gene Arfgap3 | Arfgap1, 1810(ADP-ribosylation factor GTPase activating protein 3   | NM_025445.4      |
| 23 | Gene 1700001 | 1700001L05Ri RIKEN cDNA 1700001L05 gene                             | NR_027980.1      |
| 24 | Gene Pacsin2 | Pacsin2, AI197 protein kinase C and casein kinase substrate in neur | NM_011862.3, NM  |
| 21 | Gene Mcat    | BC025519, AI2 malonyl CoA:ACP acyltransferase (mitochondrial)       | NM_001030014.2   |
| 21 | Gene Tspo    | Bzrp, PBR, Tsp:translocator protein                                 | NM_009775.4      |
| 26 | Gene Ttl12   | Ttl12, BC0553 tubulin tyrosine ligase-like family, member 12        | NM_183017.2      |
| 26 | Gene Scube1  | A630023E24Ri signal peptide, CUB domain, EGF-like 1                 | NM_022723.2      |
| 36 | Gene Ldoc1l  | Ldoc1l, BC058( leucine zipper, down-regulated in cancer 1-like      | NM_177630.3      |
| 24 | Gene Phf21b  | Phf21b, A7300 PHD finger protein 21B                                | NM_001081166.2,  |
| 24 | Gene Nup50   | 1700030K07Ri nucleoporin 50                                         | NM_016714.2      |
| 23 | Gene 5031439 | 5031439G07Ri RIKEN cDNA 5031439G07 gene                             | NM_001033273.2   |
| 24 | Gene Fbln1   | Fbln1                                                               | NM_010180.2      |
| 29 | Gene Atxn10  | C77170, Atxn1 ataxin 10                                             | NM_016843.3      |
| 19 | Gene Wnt7b   | Wnt-7b, Wnt7 wingless-related MMTV integration site 7B              | NM_009528.3, NM  |
| 19 | Gene AU0227  | AU022754 expressed sequence AU022754                                | NR_040433.1      |
| 20 | Gene Ppara   | PPAR-alpha, P:peroxisome proliferator activated receptor alpha      | NM_011144.6, NM  |
| 23 | Gene Gtse1   | Gtse1, Gtse-1, G two S phase expressed protein 1                    | NM_013882.2, NM  |
| 23 | Gene Trmu    | 1110005N20Ri tRNA 5-methylaminomethyl-2-thiouridylate methyl        | NM_028063.2      |
| 24 | Gene Celsr1  | Scy, crash, Cel:cadherin, EGF LAG seven-pass G-type receptor 1 (fla | NM_009886.2      |
| 27 | Gene Gramd4  | Gramd4, 9930( GRAM domain containing 4                              | NM_001205353.1,  |
| 23 | Gene CerK    | D330016D08R ceramide kinase                                         | NM_145475.4      |
| 26 | Gene Tbc1d22 | MGC28337, T: TBC1 domain family, member 22a                         | NM_145476.2      |
| 30 | Gene Fam19a  | Tafa-5, TAF5, family with sequence similarity 19, member A5         | NM_134096.2, NM  |
| 30 | Gene Brd1    | Brd1, mKIAA4: bromodomain containing 1                              | NM_001033274.3   |
| 25 | Gene Zbed4   | MGC59429, Z: zinc finger, BED domain containing 4                   | NM_181412.3      |
| 26 | Gene Alg12   | ECM39, Alg12, asparagine-linked glycosylation 12 (alpha-1,6-mann    | NM_145477.2, NM  |
| 26 | Gene Creld2  | Creld2, C8575( cysteine-rich with EGF-like domains 2                | NM_029720.2      |
| 43 | Gene Pim3    | MGC27707, P: proviral integration site 3                            | NM_145478.2      |
| 25 | Gene Panx2   | Panx2 pannexin 2                                                    | NM_001002005.2   |
| 25 | Gene 1810021 | 1810021B22Ri RIKEN cDNA 1810021B22 gene                             | NR_040417.1      |
| 26 | Gene Trabd   | Trabd, 573050 TraB domain containing                                | NM_026485.2      |
| 26 | Gene 1300018 | 1300018J18Ri RIKEN cDNA 1300018J18 gene                             | NM_027905.2      |
| 26 | Gene Tubgcp6 | D430023H11, tubulin, gamma complex associated protein 6             | NM_001163319.1   |
| 19 | Gene Mapk11  | Prkm11, P38b, mitogen-activated protein kinase 11                   | NM_011161.5      |
| 34 | Gene Plxb2   | 1110007H23Ri plexin B2                                              | NM_138749.2, NM  |
| 34 | Gene Dennd6l | AI414881, 170 DENN/MADD domain containing 6B                        | NM_027081.3      |
| 28 | Gene Ppp6r2  | 1110033O10Ri protein phosphatase 6, regulatory subunit 2            | NM_027805.2, NM  |
| 15 | Gene Shank3  | Shank3b, AI84 SH3/ankyrin domain gene 3                             | NM_021423.3      |
| 19 | Gene Rabl2   | AW549303, Ra RAB, member of RAS oncogene family-like 2              | NM_026817.3      |

|    |               |                                                                       |                  |
|----|---------------|-----------------------------------------------------------------------|------------------|
| 26 | Gene Kif21a   | AI850764, Kif2 kinesin family member 21A                              | NM_016705.3, NM  |
| 28 | Gene Slc2a13  | A630029G22R solute carrier family 2 (facilitated glucose transporter) | NM_001033633.3   |
| 26 | Gene Zcrb1    | Madp-1, Zcrb1 zinc finger CCHC-type and RNA binding motif 1           | NM_026025.2      |
| 26 | Gene Pphln1   | HSPC232, 160( periphilin 1                                            | NM_146062.2, NM  |
| 38 | Gene Prickle1 | Prickle1, mpk1 prickle homolog 1 (Drosophila)                         | NM_001033217.4   |
| 18 | Gene Adamts2  | Adamts20, Ad: a disintegrin-like and metallopeptidase (reprolysin t   | NM_177431.4, NM  |
| 27 | Gene Twf1     | A6, twinfilin, P twinfilin, actin-binding protein, homolog 1 (Drosoph | NM_008971.4      |
| 18 | Gene Nell2    | mel91, Nell2, /NEL-like 2                                             | NM_016743.2      |
| 34 | Gene A130051  | ENSMUSG000( RIKEN cDNA A130051J0 gene                                 | XR_141262.1      |
| 34 | Gene Ano6     | AW554778, Tnanoctamin 6                                               | NM_001253813.1,  |
| 23 | Gene E330033  | E330033B04Ri RIKEN cDNA E330033B04 gene                               | NR_030690.1      |
| 23 | Gene Arid2    | zipzap/p200, AAT rich interactive domain 2 (ARID, RFX-like)           | NM_175251.4      |
| 29 | Gene Scaf11   | Scaf11, mKIAA SR-related CTD-associated factor 11                     | NM_028148.2      |
| 37 | Gene Slc38a1  | AA408026, AL( solute carrier family 38, member 1                      | NM_134086.4, NM  |
| 23 | Gene Slc38a2  | mKIAA1382, 5( solute carrier family 38, member 2                      | NM_175121.3      |
| 20 | Gene Rpap3    | 2310042P20Ri RNA polymerase II associated protein 3                   | NM_028003.2      |
| 20 | Gene Endou    | Pp11r, Endou, endonuclease, polyU-specific                            | NM_008902.3, NM  |
| 17 | Gene Tmem10   | MGC54819, AI transmembrane protein 106C                               | NM_001252153.1   |
| 22 | Gene Asb8     | Asb8, 493053( ankyrin repeat and SOCS box-containing 8                | NM_030121.4, NM  |
| 22 | Gene AI83600  | AI836003, 563 expressed sequence AI836003                             | NM_177716.3      |
| 33 | Gene Kansl2   | Kansl2, 2310037I24Rik, MGC101985, B930009D17, MGC102368               | NM_133714.4      |
| 33 | Gene Snora2b  | Snora2b, MBI- small nucleolar RNA, H/ACA box 2B                       | NR_034052.1      |
| 33 | Gene Ccnt1    | AI115585, Cyc' cyclin T1                                              | NM_009833.1      |
| 28 | Gene 9330020  | 9330020H09Ri RIKEN cDNA 9330020H09 gene                               | NR_028442.1      |
| 28 | Gene 4930415  | 4930415O20Ri RIKEN cDNA 4930415O20 gene                               | NM_001201322.1   |
| 19 | Gene Adcy6    | Adcy6, mKIAA(adenylate cyclase 6                                      | NM_007405.2      |
| 15 | Gene Cacnb3   | Cacnb3, Cchb3 calcium channel, voltage-dependent, beta 3 subunit      | NM_007581.2, NM  |
| 23 | Gene Ddx23    | 3110082M05R DEAD (Asp-Glu-Ala-Asp) box polypeptide 23                 | NM_001080981.1   |
| 23 | Gene Rnd1     | A830014L09Ri Rho family GTPase 1                                      | NM_172612.3      |
| 41 | Gene Arf3     | Arf3, 5430400(ADP-ribosylation factor 3                               | NM_007478.3      |
| 41 | Gene Wnt10b   | Wnt12, Wnt10 wingless related MMTV integration site 10b               | NM_011718.2      |
| 23 | Gene Ddn      | Ddn, Gm748 dendrin                                                    | NM_001013741.1   |
| 23 | Gene B130046  | B130046B21Ri RIKEN cDNA B130046B21 gene                               | XR_106961.1, XR_ |
| 23 | Gene Prkag1   | Prkaac, BB036 protein kinase, AMP-activated, gamma 1 non-cataly       | NM_016781.2      |
| 35 | Gene Mll2     | KMT2D, Mll2, l myeloid/lymphoid or mixed-lineage leukemia 2           | NM_001033276.3   |
| 35 | Gene Rhebl1   | 1810036J22Ri( Ras homolog enriched in brain like 1                    | NM_026967.4      |
| 38 | Gene Dhh      | MGC73610, D( desert hedgehog                                          | NM_007857.4      |
| 38 | Gene Lmbr1l   | D15Ert(735e, limb region 1 like                                       | NM_029098.3      |
| 31 | Gene Tuba1b   | Tuba2, Tuba1( tubulin, alpha 1B                                       | NM_011654.2      |
| 28 | Gene Tuba1a   | MGC102097, T tubulin, alpha 1A                                        | NM_011653.2      |
| 20 | Gene Tuba1c   | M[a]6, Tuba1c tubulin, alpha 1C                                       | NM_009448.4      |
| 21 | Gene Prph     | Prph1, Prph peripherin                                                | NM_013639.2, NM  |
| 20 | Gene Troap    | E130301L11Ri( trophinin associated protein                            | NM_030159.1, NM  |
| 20 | Gene C1ql4    | C1qtnf11, C1ql complement component 1, q subcomponent-like 4          | NM_001024702.1   |
| 20 | Gene Dnajc22  | AI506245, 281 DnaJ (Hsp40) homolog, subfamily C, member 22            | NM_176835.2      |
| 16 | Gene Kcnh3    | AU019351, C0( potassium voltage-gated channel, subfamily H (eag-      | NM_010601.3      |
| 16 | Gene Mcrs1    | C78274, ICP22 microspherule protein 1                                 | NM_016766.3, NM  |

|    |                                                                                         |                  |
|----|-----------------------------------------------------------------------------------------|------------------|
| 16 | Gene 170012C1700120C14Ri RIKEN cDNA 1700120C14 gene                                     | NR_045627.2      |
| 26 | Gene Nckap5l Nckap5l, C230iNCK-associated protein 5-like                                | NM_001001884.1   |
| 24 | Gene Bcdin3d AV138748, BccBCDIN3 domain containing                                      | NM_029236.2      |
| 17 | Gene Racgap1 MgcRacGAP, B Rac GTPase-activating protein 1                               | NM_001253808.1   |
| 25 | Gene Cers5 Cers5, AW544927, CerS5, 2310081H14Rik, Lass5, AU045339, Trh4                 | NM_028015.2      |
| 25 | Gene Lima1 D15Etd366e, LIM domain and actin binding 1                                   | NM_023063.3, NM  |
| 42 | Gene Larp4 D330037H05R La ribonucleoprotein domain family, member 4                     | NM_001080948.1,  |
| 42 | Gene 23100682310068J16Ri RIKEN cDNA 2310068J16 gene                                     | NR_028124.1      |
| 24 | Gene Dip2b 4932422C22, DIP2 disco-interacting protein 2 homolog B (Drosophila)          | NM_001159361.1   |
| 36 | Gene Slc11a2 Nramp2, Slc11 solute carrier family 11 (proton-coupled divalent metal ion) | NM_008732.2, NM  |
| 36 | Gene Gm5475 Gm5475, EG43 predicted gene 5475                                            | NR_040351.1      |
| 33 | Gene Letmd1 Mccr, A159352 LETM1 domain containing 1                                     | NM_134093.2      |
| 33 | Gene Csrnp2 Csrnp2, MGC2 cysteine-serine-rich nuclear protein 2                         | NM_153407.2      |
| 31 | Gene Tfcp2 CP-2, Tfcp2, LB transcription factor CP2                                     | NM_033476.2      |
| 33 | Gene C330013C330013E15Ri RIKEN cDNA C330013E15 gene                                     | NR_045701.1      |
| 33 | Gene Dazap2 Gcap28, MGC2 DAZ associated protein 2                                       | NM_011873.2      |
| 33 | Gene Smagp MGC7903, Sm:small cell adhesion glycoprotein                                 | NM_174992.3, NM  |
| 23 | Gene Scn8a C630029C19Ri sodium channel, voltage-gated, type VIII, alpha                 | NM_001077499.1   |
| 23 | Gene Fignl2 EG668225, Fig fidgetin-like 2                                               | NM_001214911.1   |
| 21 | Gene Ankrd33 A930021G21R ankyrin repeat domain 33                                       | NM_144790.1      |
| 21 | Gene Acvrl1 A115505, Acv activin A receptor, type II-like 1                             | NM_009612.2      |
| 34 | Gene A330009A330009N23R RIKEN cDNA A330009N23 gene                                      | NR_045326.1, NR_ |
| 34 | Gene AU02106AU021063 expressed sequence AU021063                                        | NR_045996.1      |
| 34 | Gene Grasp tamalin, Grasp GRP1 (general receptor for phosphoinositides 1)-ass           | NM_019518.3      |
| 24 | Gene Nr4a1 Hbr1, NGFIB, nuclear receptor subfamily 4, group A, member 1                 | NM_010444.2      |
| 24 | Gene 9430023AU022967, Atg RIKEN cDNA 9430023L20 gene                                    | NM_026566.2      |
| 24 | Gene 60304086030408B16Ri RIKEN cDNA 6030408B16 gene                                     | NR_033803.1      |
| 26 | Gene Eif4b 2310046H11Ri eukaryotic translation initiation factor 4B                     | NM_145625.3      |
| 24 | Gene A030007A030007N12R RIKEN cDNA A030007N12 gene                                      | XR_168541.1, XR_ |
| 26 | Gene Tenc1 nep, Tenc1, C1 tensin like C1 domain-containing phosphatase                  | NM_153533.2      |
| 38 | Gene Spryd3 Spryd3, BC008 SPRY domain containing 3                                      | NM_001033277.3   |
| 38 | Gene Igfbp6 IGFBP-6, Igfbp:insulin-like growth factor binding protein 6                 | NM_008344.3      |
| 20 | Gene Soat2 D15Wsu97e, Asterol O-acyltransferase 2                                       | NM_146064.1      |
| 24 | Gene Rarg RARgamma2, I retinoic acid receptor, gamma                                    | NM_001042727.1   |
| 37 | Gene Gm9918 ENSMUSG000 predicted gene 9918                                              | XR_168740.1, XR_ |
| 37 | Gene Mfsd5 D15Mgi27, AM major facilitator superfamily domain containing 5               | NM_134100.4      |
| 38 | Gene Espl1 SSE, ESP1, AL0 extra spindle poles-like 1 (S. cerevisiae)                    | NM_001014976.2   |
| 24 | Gene Aaas ADRACALA, DC achalasia, adrenocortical insufficiency, alacrimia               | NM_153416.2      |
| 24 | Gene Sp7 Osx, Sp7, MGC Sp7 transcription factor 7                                       | NM_130458.3      |
| 20 | Gene Prr13 1110020C13Ri proline rich 13                                                 | NM_025385.3, NM  |
| 20 | Gene Pcbp2 Pcbp2, Hnrpx, poly(rC) binding protein 2                                     | NM_001103165.1   |
| 18 | Gene Hoxc13 Hoxc13                                                                      | NM_010464.2      |
| 27 | Gene Hoxc10 Hox-3.6, Hoxc1 homeobox C10                                                 | NM_010462.5      |
| 27 | Gene Mir196a Mirn196a-2, M microRNA 196a-2                                              | NR_029722.1      |
| 27 | Gene Hoxc9 Hoxc9, Hox-3.2 homeobox C9                                                   | NM_008272.3      |
| 27 | Gene Hoxc8 Hox-3.1, D130i homeobox C8                                                   | NM_010466.2      |
| 19 | Gene Cbx5 Cbx5, 2610029 chromobox 5                                                     | NM_007626.3, NM  |

|    |              |                                                                                    |                          |
|----|--------------|------------------------------------------------------------------------------------|--------------------------|
| 21 | Gene Itga5   | Itga5, Fnra, Cd integrin alpha 5 (fibronectin receptor alpha)                      | NM_010577.3              |
| 27 | Gene Naa60   | 1200013P24Ri N(alpha)-acetyltransferase 60, NatF catalytic subunit                 | NM_029090.3              |
| 30 | Gene Trap1   | Trap1, HSP75, TNF receptor-associated protein 1                                    | NM_026508.2              |
| 30 | Gene Crebbp  | AW558298, Cr CREB binding protein                                                  | NM_001025432.1           |
| 20 | Gene 4930455 | 4930455F16Ri RIKEN cDNA 4930455F16 gene                                            | NR_040570.1, NR_040570.2 |
| 31 | Gene Adcy9   | Adcy9, D16Ws adenylate cyclase 9                                                   | NM_009624.2              |
| 35 | Gene Tfp4    | AP-4, bHLHc41 transcription factor AP4                                             | NM_031182.2              |
| 26 | Gene Glis2   | Nkl, Glis2, Gli5 GLIS family zinc finger 2                                         | NM_031184.3              |
| 19 | Gene Coro7   | AW048373, A\ coronin 7                                                             | NM_030205.4              |
| 19 | Gene Vsn     | Atia, Slit2, 261vasorin                                                            | NM_139307.3              |
| 27 | Gene Nmr1    | Nmr1, A1256 NmrA-like family domain containing 1                                   | NM_026393.1              |
| 27 | Gene Hmox2   | HO-2, Hmox2, heme oxygenase (decycling) 2                                          | NM_010443.2, NM_010443.3 |
| 31 | Gene Cdip1   | Cdip1, 573040 cell death inducing Trp53 target 1                                   | NM_025670.4              |
| 42 | Gene Gm1091  | ENSMUSG000(predicted gene 10914                                                    | XR_141300.1, XR_141300.2 |
| 42 | Gene Ubal1   | BC013706, Far UBA-like domain containing 1                                         | NM_145359.2              |
| 42 | Gene Mgrn1   | md, N28182, 2 mahogunin, ring finger 1                                             | NM_001252437.1           |
| 24 | Gene Anks3   | C81345, Anks3 ankyrin repeat and sterile alpha motif domain containing 3           | NM_028301.4              |
| 24 | Gene 4930451 | 4930451G09Ri RIKEN cDNA 4930451G09 gene                                            | XR_035207.1, XR_035207.2 |
| 31 | Gene Gyr1    | 2810419J22Ri glyoxylate reductase 1 homolog (Arabidopsis)                          | NM_028720.2, NM_028720.3 |
| 31 | Gene Ubn1    | AA673476, A\ ubinuclein 1                                                          | NM_026666.3              |
| 35 | Gene Nagpa   | A1596180, Nag N-acetylglucosamine-1-phosphodiester alpha-N-acetylglucosaminidase 1 | NM_013796.3, NR_013796.4 |
| 35 | Gene AU02109 | AU021092 expressed sequence AU021092                                               | NM_001033220.3           |
| 35 | Gene Alg1    | Alg1, HMT1, N asparagine-linked glycosylation 1 (beta-1,4-mannosyltransferase 1)   | NM_145362.2              |
| 35 | Gene Fam86   | Fam86, 573041 family with sequence similarity 86                                   | NM_027446.2              |
| 23 | Gene Tmem18  | Tmem186, 281transmembrane protein 186                                              | NM_025708.4              |
| 23 | Gene Pmm2    | Pmm2, A15858 phosphomannomutase 2                                                  | NM_016881.2              |
| 26 | Gene Carhsp1 | 1200011K09Ri calcium regulated heat stable protein 1                               | NM_025821.2              |
| 26 | Gene Gm5767  | Gm5767, EG43 predicted gene 5767                                                   | XM_622598.5, XM_622598.6 |
| 24 | Gene Usp7    | 2210010O09Ri ubiquitin specific peptidase 7                                        | NM_001003918.2           |
| 42 | Gene 1810013 | 3010002C02Ri RIKEN cDNA 1810013L24 gene                                            | NM_001081400.3           |
| 22 | Gene Atf7ip2 | MGC6783, PSM activating transcription factor 7 interacting protein 2               | NM_153123.2, NM_153123.3 |
| 44 | Gene Socs1   | SOCS-1, Cish7, suppressor of cytokine signaling 1                                  | NM_009896.2              |
| 44 | Gene Tnp2    | TP2, Tp-2, Tnp transition protein 2                                                | NM_013694.4              |
| 44 | Gene Prm3    | Pxg, MGC1072 protamine 3                                                           | NM_013638.2              |
| 44 | Gene Prm2    | A1528784, Prm protamine 2                                                          | NM_008933.1              |
| 26 | Gene Rmi2    | RMI2, A63005 RMI2, RecQ mediated genome instability 2, homolog 2                   | NM_001162932.1           |
| 37 | Gene Litaf   | 3222402J11Ri LPS-induced TN factor                                                 | NM_019980.2              |
| 21 | Gene Snn     | MGC107297, Sstannin                                                                | NM_009223.3              |
| 21 | Gene Txndc11 | 2810408E11Ri thioredoxin domain containing 11                                      | NM_029582.2, NM_029582.3 |
| 24 | Gene Rsl1d1  | Rsl1d1, C7643 ribosomal L1 domain containing 1                                     | NM_025546.2              |
| 24 | Gene 2610020 | 2610020C07Ri RIKEN cDNA 2610020C07 gene                                            | NR_038156.1              |
| 38 | Gene Gspt1   | Gst-1, G1st, A1 G1 to S phase transition 1                                         | NM_146066.2, NM_146066.3 |
| 38 | Gene Mir1945 | mmu-mir-1945 microRNA 1945                                                         | NR_035466.1              |
| 28 | Gene Mkl2    | mKIAA1243, E1MKL/myocardin-like 2                                                  | NM_181860.1, NM_181860.2 |
| 14 | Gene Mir193b | Mir193b, Mir1 microRNA 193b                                                        | NR_030549.1              |
| 14 | Gene Mir365  | Mir365-1, Mi microRNA 365-1                                                        | NR_029855.1              |
| 32 | Gene Parn    | DAN, Parn, 12(poly(A)-specific ribonuclease (deadenylation nuclear))               | NM_028761.3              |



|    |              |                                                                           |                  |
|----|--------------|---------------------------------------------------------------------------|------------------|
| 32 | Gene Bfar    | AI666707, RNF bifunctional apoptosis regulator                            | NM_001177552.1   |
| 32 | Gene 3110001 | 3110001I22Rik RIKEN cDNA 3110001I22 gene                                  | NM_025653.2      |
| 29 | Gene Rrn3    | TIF-1A, Tif1a, RRN3 RNA polymerase I transcription factor homolog         | NM_001039521.1   |
| 27 | Gene Ntan1   | Ntan1                                                                     | NM_010946.3      |
| 37 | Gene Pdxdc1  | Kiaa0251-hp, F pyridoxal-dependent decarboxylase domain containing        | NM_053181.2, NM  |
| 38 | Gene Cebpd   | Cebpd CCAAT/enhancer binding protein (C/EBP), delta                       | NM_007679.4      |
| 38 | Gene 2310008 | 2310008H04Ri RIKEN cDNA 2310008H04 gene                                   | NM_146068.3      |
| 38 | Gene Yars2   | 2210023C10Ri tyrosyl-tRNA synthetase 2 (mitochondrial)                    | NR_038046.1, NM  |
| 38 | Gene Dnm1l   | python, AI450t dynamin 1-like                                             | NM_001025947.1   |
| 21 | Gene Igl1    | Igll1, Igl1, Igl-5, immunoglobulin lambda-like polypeptide 1              | NM_001190325.1   |
| 21 | Gene Vpreb1  | MGC151428, Vpre-B lymphocyte gene 1                                       | NM_016982.2      |
| 21 | Gene Top3b   | Top3b                                                                     | NM_011624.2      |
| 26 | Gene Mapk1   | C78273, p41m mitogen-activated protein kinase 1                           | NM_001038663.1   |
| 29 | Gene 2610318 | 2610318N02Ri RIKEN cDNA 2610318N02 gene                                   | NM_183287.2      |
| 29 | Gene Mir130b | Mir130b, Mir microRNA 130b                                                | NR_029659.1      |
| 29 | Gene Mir301b | Mir301b, Mir microRNA 301b                                                | NR_030415.1      |
| 29 | Gene Sdf2l1  | Sdf2l1                                                                    | NM_022324.3      |
| 29 | Gene Gm6440  | Gm6440, EG62 Rps20 pseudogene                                             |                  |
| 29 | Gene Ccdc116 | Ccdc116, 4930 coiled-coil domain containing 116                           | NM_029779.2, NM  |
| 27 | Gene Ube2l3  | MGC118100, Ubiquitin-conjugating enzyme E2L 3                             | NM_009456.2      |
| 27 | Gene Rimbp3  | RIM-BP3, Gm6 RIMS binding protein 3                                       | NM_001033338.3   |
| 25 | Gene Hic2    | mKIAA1020, H hypermethylated in cancer 2                                  | NM_178922.3      |
| 30 | Gene Pi4ka   | Pi4ka, Pik4ca phosphatidylinositol 4-kinase, catalytic, alpha polypeptide | NM_001001983.2   |
| 30 | Gene Snap29  | AI891940, AUC synaptosomal-associated protein 29                          | NM_023348.4      |
| 23 | Gene Crkl    | Crkol, 1110025v-crkl sarcoma virus CT10 oncogene homolog (avian)          | NM_007764.4      |
| 29 | Gene Lztr1   | AW550890, AI leucine-zipper-like transcriptional regulator, 1             | NM_025808.3      |
| 29 | Gene Thap7   | 1810004B07Ri THAP domain containing 7                                     | NM_026909.2      |
| 24 | Gene Smpd4   | Smpd4, 41224 sphingomyelin phosphodiesterase 4                            | NM_029945.3, NM  |
| 25 | Gene Med15   | AW536074, M mediator complex subunit 15                                   | NM_033609.2, NM  |
| 31 | Gene Klhl22  | Klhl22, Kelch1, 2610318I18Rik                                             | NM_145479.4      |
| 31 | Gene Scarf2  | W65560, Scarf scavenger receptor class F, member 2                        | NM_153790.2      |
| 18 | Gene B830017 | B830017H08Ri RIKEN cDNA B830017H08 gene                                   | NR_027959.1      |
| 18 | Gene Car15   | AI315043, Ca1 carbonic anhydrase 15                                       | NM_030558.2      |
| 35 | Gene Dgcr2   | Idd, 99300340 DiGeorge syndrome critical region gene 2                    | NM_010048.3, NM  |
| 35 | Gene Tssk1   | TSK-1, Tssk, Ts testis-specific serine kinase 1                           | NM_009435.2      |
| 35 | Gene Tssk2   | DGS-G, Tssk2, testis-specific serine kinase 2                             | NM_009436.2      |
| 35 | Gene Dgcr14  | Dgcr14, D16H22 DiGeorge syndrome critical region gene 14                  | NM_022408.2, NM  |
| 24 | Gene Slc25a1 | AI194714, Dgs solute carrier family 25 (mitochondrial carrier, citrate)   | NM_153150.2      |
| 21 | Gene Zdhhc8  | MGC118171, C zinc finger, DHHC domain containing 8                        | NM_172151.4      |
| 43 | Gene Ranbp1  | Ranbp1, Htf9a RAN binding protein 1                                       | NM_011239.2      |
| 43 | Gene Trmt2a  | Htf9c, Trmt2a TRM2 tRNA methyltransferase 2A                              | NM_001080999.2   |
| 43 | Gene Dgcr8   | Dgcr8, D16H22 DiGeorge syndrome critical region gene 8                    | NM_033324.2      |
| 23 | Gene Mir1306 | mmu-mir-1306 microRNA 1306                                                | NR_035467.2      |
| 23 | Gene Arvcf   | Arvcf                                                                     | NM_033474.2      |
| 28 | Gene Gnb1l   | Wdr14, OTTM guanine nucleotide binding protein (G protein), beta          | NM_001081682.1   |
| 23 | Gene Tbx1    | Tbx1                                                                      | NM_011532.1      |
| 23 | Gene 4930588 | 4930588K23Ri RIKEN cDNA 4930588K23 gene                                   | XR_105808.1, XR_ |

|    |              |                                                                        |                  |
|----|--------------|------------------------------------------------------------------------|------------------|
| 24 | Gene Cldn5   | MBEC1, Cldn5, claudin 5                                                | NM_013805.4      |
| 24 | Gene Cdc45   | Cdc45, Cdc45l cell division cycle 45                                   | NM_009862.2, NM  |
| 31 | Gene Mrpl40  | Nlvcf, Mrpl40 mitochondrial ribosomal protein L40                      | NM_010922.2      |
| 31 | Gene Hira    | N28177, Tuple histone cell cycle regulation defective homolog A (S.    | NM_010435.2      |
| 19 | Gene B3gnt5  | B3gnt5, beta3(UDP-GlcNAc:betaGal beta-1,3-N-acetylglucosaminyl         | NM_054052.3, NM  |
| 41 | Gene Klhl24  | 4930429H24Rik, 6530402O20Rik, 1110046J11Rik, C85082, Klhl24            | NM_029436.3      |
| 33 | Gene Yeats2  | BC042768, mKYEATS domain containing 2                                  | NM_001145930.1,  |
| 34 | Gene Parl    | Psarl, Parl, PSA presenilin associated, rhomboid-like                  | NM_001005767.4   |
| 34 | Gene Cyp2ab1 | Cyp2ab1, EG2; cytochrome P450, family 2, subfamily ab, polypeptic      | NM_183158.3      |
| 22 | Gene Abcc5   | Abcc5b, Abcc5 ATP-binding cassette, sub-family C (CFTR/MRP), mer       | NM_013790.2, NM  |
| 24 | Gene Eif2b5  | Eif2b5, C81315; eukaryotic translation initiation factor 2B, subunit 5 | NM_172265.2      |
| 24 | Gene Gm1661  | Gm16618 predicted gene, 16618                                          | XR_105763.2, XR_ |
| 24 | Gene Dvl3    | Dvl3                                                                   | NM_007889.2      |
| 28 | Gene Alg3    | Alg3, D16Ertde; asparagine-linked glycosylation 3 (alpha-1,3-manno:    | NM_145939.2      |
| 28 | Gene Ece2    | MGC144385, E endothelin converting enzyme 2                            | NM_025462.2, NM  |
| 28 | Gene Camk2n  | 2900075A18Ri calcium/calmodulin-dependent protein kinase II inh        | NM_028420.2      |
| 19 | Gene Psmd2   | Tex190, Psmd; proteasome (prosome, macropain) 26S subunit, non         | NM_134101.2, NR  |
| 19 | Gene Eif4g1  | MGC37551, Eil eukaryotic translation initiation factor 4, gamma 1      | NM_145941.2, NM  |
| 19 | Gene Fam131a | Fam131a, 290i family with sequence similarity 131, member A            | NM_133778.2      |
| 24 | Gene Clcn2   | CIC-2, Clc2, nrr chloride channel 2                                    | NM_009900.2      |
| 24 | Gene Polr2h  | Polr2h, MGC1i (polymerase (RNA) II (DNA directed) polypeptide H        | NM_145632.2      |
| 24 | Gene Thpo    | Tpo3, Tpo2, TF thrombopoietin                                          | NM_009379.3, NM  |
| 19 | Gene Chrd    | Chd, Chrd chordin                                                      | NM_009893.2      |
| 31 | Gene 2510009 | 2510009E07Ri RIKEN cDNA 2510009E07 gene                                | NM_001001881.2   |
| 18 | Gene Tmem41  | 5730578N08Ri transmembrane protein 41a                                 | NM_025693.4, NR  |
| 18 | Gene Liph    | lpd2, P3, D16V lipase, member H                                        | NM_001083894.1,  |
| 29 | Gene Igf2bp2 | IMP-2, C33001 insulin-like growth factor 2 mRNA binding protein 2      | NM_183029.2      |
| 30 | Gene Tra2b   | SIG-41, Sfrs10, transformer 2 beta homolog (Drosophila)                | NM_009186.4      |
| 26 | Gene Etv5    | 1110005E01Ri ets variant gene 5                                        | NM_023794.2      |
| 35 | Gene Eif4a2  | BM-010, Eif4, eukaryotic translation initiation factor 4A2             | NM_013506.2, NM  |
| 35 | Gene Snord2  | Snord2 small nucleolar RNA, C/D box 2                                  | NR_030705.1      |
| 35 | Gene Snora81 | Snora81, MBI-i small nucleolar RNA, H/ACA box 81                       | NR_034048.1      |
| 35 | Gene Rfc4    | AI894123, A1, replication factor C (activator 1) 4                     | NM_145480.1      |
| 16 | Gene Bcl6    | Bcl6, Bcl5 B cell leukemia/lymphoma 6                                  | NM_009744.3      |
| 30 | Gene Leprel1 | AW553532, Le leprecan-like 1                                           | NM_173379.2      |
| 19 | Gene Ccdc50  | Ccdc50, AW04 coiled-coil domain containing 50                          | NM_026202.3, NM  |
| 22 | Gene Fgf12   | Fhf1, Fgf12, A\ fibroblast growth factor 12                            | NM_010199.2, NM  |
| 24 | Gene Mb21d2  | A430031N04, i Mab-21 domain containing 2                               | NM_177718.3      |
| 22 | Gene 4632428 | Gm4231, 4632 RIKEN cDNA 4632428C04 gene                                | NR_033631.1      |
| 30 | Gene Hes1    | Hes1, bHLHb3! hairy and enhancer of split 1 (Drosophila)               | NM_008235.2      |
| 26 | Gene Atp13a3 | AU022875, At; ATPase type 13A3                                         | NM_001128094.1   |
| 25 | Gene Fam43a  | Fam43a, Tuf1 family with sequence similarity 43, member A              | NM_177632.3      |
| 39 | Gene Acap2   | 9530039J15Ril ArfGAP with coiled-coil, ankyrin repeat and PH dom:      | NM_030138.2      |
| 16 | Gene Ppp1r2  | D16Ertde248e, protein phosphatase 1, regulatory (inhibitor) subuni     | NM_025800.3      |
| 29 | Gene Bdh1    | 2310032J20Ril 3-hydroxybutyrate dehydrogenase, type 1                  | NM_175177.4, NM  |
| 37 | Gene Pigz    | F630022B06Ri phosphatidylinositol glycan anchor biosynthesis, cla:     | NM_172822.3      |
| 37 | Gene 0610012 | 0610012G03Ri RIKEN cDNA 0610012G03 gene                                | NR_027897.1      |

|    |               |                                                                          |                 |
|----|---------------|--------------------------------------------------------------------------|-----------------|
| 37 | Gene Ncbp2    | 20kDa, 593041 nuclear cap binding protein subunit 2                      | NM_026554.4     |
| 21 | Gene Senp5    | SMT3IP3, DKF7SUMO/sentrin specific peptidase 5                           | NM_177103.4     |
| 35 | Gene Ubxn7    | Ubx7, A63001 UBX domain protein 7                                        | NM_177633.4     |
| 21 | Gene Tctex1d2 | Tctex1d2, O611 Tctex1 domain containing 2                                | NM_025329.3     |
| 21 | Gene Pcyt1a   | Cctalpha, Pcyt: phosphate cytidyltransferase 1, choline, alpha isoform   | NM_009981.4, NM |
| 30 | Gene Tfrc     | TFR1, CD71, E4 transferrin receptor                                      | NM_011638.4     |
| 20 | Gene Tnk2     | AW552477, A tyrosine kinase, non-receptor, 2                             | NM_016788.3, NM |
| 33 | Gene 1700021  | mKIAA0226, 1 RIKEN cDNA 1700021K19 gene                                  | NM_172615.4, NM |
| 33 | Gene Fytd1    | AI098218, AW forty-two-three domain containing 1                         | NM_027226.4, NM |
| 25 | Gene Lrch3    | 2210409B11Ri leucine-rich repeats and calponin homology (CH) domain      | NM_001081255.1  |
| 25 | Gene Gm6611   | Gm6611, EG62 predicted gene 6611                                         |                 |
| 32 | Gene Iqcg     | 2400003L07Ri IQ motif containing G                                       | NM_178378.3     |
| 32 | Gene Rpl35a   | Rpl35a, Rpl35, ribosomal protein L35A                                    | NM_021338.3, NM |
| 32 | Gene Lmln     | 5330415H22Ri leishmanolysin-like (metallopeptidase M8 family)            | NM_172823.2     |
| 31 | Gene Osbpl11  | 9430097N02Ri oxysterol binding protein-like 11                           | NM_176840.3     |
| 31 | Gene Snx4     | Snx4, AI037061 sorting nexin 4                                           | NM_080557.2     |
| 23 | Gene 1700007  | 1700007L15Ri RIKEN cDNA 1700007L15 gene                                  | NR_045709.1     |
| 23 | Gene Zfp148   | ZBP-89, BERF-1 zinc finger protein 148                                   | NM_011749.4     |
| 27 | Gene Heg1     | OTTMUSG0001 HEG homolog 1 (zebrafish)                                    | NM_175256.5     |
| 21 | Gene Umps     | AA408257, AL uridine monophosphate synthetase                            | NM_009471.2     |
| 21 | Gene Kalrn    | Hapip, 221040 kalirin, RhoGEF kinase                                     | NM_001164268.1  |
| 18 | Gene Mylk     | Mylk, A930015 myosin, light polypeptide kinase                           | NM_139300.3     |
| 25 | Gene Ptplb    | AI255777, Ptpl protein tyrosine phosphatase-like (proline instead of     | NM_023587.2     |
| 29 | Gene Adcy5    | AW121902, Adenylate cyclase 5                                            | NM_001012765.4  |
| 22 | Gene Sec22a   | 1810005C06Ri SEC22 vesicle trafficking protein homolog A (S. cerevisiae) | NM_133704.4     |
| 30 | Gene Pdia5    | Pdia5, 270005 protein disulfide isomerase associated 5                   | NM_028295.1     |
| 31 | Gene Sema5b   | mKIAA1445, Sema domain, seven thrombospondin repeats (type 5)            | NM_013661.2     |
| 27 | Gene Dirc2    | Dirc2, RCC4, M disrupted in renal carcinoma 2 (human)                    | NM_153550.3     |
| 27 | Gene Hspbap1  | Hspbap1, 383C Hspb associated protein 1                                  | NM_175111.3     |
| 34 | Gene Fam162   | 2310056P07Ri family with sequence similarity 162, member A               | NM_027342.1     |
| 34 | Gene Ccdc58   | AI413631, A93 coiled-coil domain containing 58                           | NM_198645.2, NM |
| 21 | Gene Fstl1    | Fstl1, TSC-36, follistatin-like 1                                        | NM_008047.5     |
| 37 | Gene Lrrc58   | Lrrc58, 181001 leucine rich repeat containing 58                         | NM_177093.3     |
| 38 | Gene BC031361 | BC031361 cDNA sequence BC031361                                          | NR_033221.1     |
| 38 | Gene Gsk3b    | Gsk3b, GSK-3b glycogen synthase kinase 3 beta                            | NM_019827.6     |
| 24 | Gene Adprh    | Adprh, Arh1 ADP-ribosylarginine hydrolase                                | NM_007414.3     |
| 24 | Gene Cd80     | MIC17, B7-1, CD80 antigen                                                | NM_009855.2     |
| 19 | Gene Poglut1  | Rumi, 9630046 protein O-glucosyltransferase 1                            | NM_172380.3     |
| 19 | Gene Tmem39   | Tmem39a, 261 transmembrane protein 39a                                   | NM_026407.3, NM |
| 20 | Gene Arhgap3  | 5830477L08Ri Rho GTPase activating protein 31                            | NM_020260.2     |
| 16 | Gene B4galt4  | beta4GalT-IV, UDP-Gal:betaGlcNAc beta 1,4-galactosyltransferase, 4       | NM_019804.3     |
| 27 | Gene Zdhhc23  | Gm1751, Zdhh zinc finger, DHHC domain containing 23                      | NM_001007460.1  |
| 27 | Gene Gramd1   | 4921521N14Ri GRAM domain containing 1C                                   | NM_001172107.1  |
| 27 | Gene Atp6v1a  | VA68, AI64706 ATPase, H+ transporting, lysosomal V1 subunit A            | NM_007508.5     |
| 27 | Gene Naa50    | Nat13, San, 28 N(alpha)-acetyltransferase 50, NatE catalytic subunit     | NM_028108.3     |
| 19 | Gene Gm608    | 5530400K22Ri predicted gene 608                                          | NM_001029889.2  |
| 23 | Gene Spice1   | D16Etd480e, spindle and centriole associated protein 1                   | NM_144550.4     |

|    |                   |                                                                     |                  |
|----|-------------------|---------------------------------------------------------------------|------------------|
| 27 | Gene Boc          | 4732455C11, Ebiregional cell adhesion molecule-related/down-reg     | NM_172506.2      |
| 27 | Gene Mir3081      | mmu-mir-3081 microRNA 3081                                          | NR_037242.1      |
| 28 | Gene BC027231     | BC027231, Ne cDNA sequence BC027231                                 | NM_145972.4      |
| 25 | Gene Slc35a5      | BB097433, Slc: solute carrier family 35, member A5                  | NM_028756.4      |
| 25 | Gene Atg3         | Apg3l, PC3-96, autophagy related 3                                  | NM_026402.3      |
| 19 | Gene Cd200        | Mox2, OX2, Cd CD200 antigen                                         | NM_010818.3      |
| 19 | Gene Gm609        | Gm1749, Gm6 predicted gene 609                                      | NM_001005854.2   |
| 19 | Gene Pvrl3        | Pvrl3, AA4077: poliovirus receptor-related 3                        | NM_021497.2, NM  |
| 27 | Gene Dzip3        | 2A-HUB, 2310(DAZ interacting protein 3, zinc finger                 | NM_027341.2, NM  |
| 27 | Gene C330027      | AA408511, Kia RIKEN cDNA C330027C09 gene                            | NM_172616.2      |
| 26 | Gene lft57        | lft57, Hippi, Es intraflagellar transport 57                        | NM_028680.3      |
| 25 | Gene Cd47         | AA407862, IAF CD47 antigen (Rh-related antigen, integrin-associated | NM_010581.3      |
| 23 | Gene Bbx          | 5730403O13Ri bobby sox homolog (Drosophila)                         | NM_027444.3      |
| 24 | Gene G730013      | G730013B05Ri RIKEN cDNA G730013B05 gene                             | NR_040379.1, NR_ |
| 33 | Gene Cblb         | Cbl-b, Cblb, Al Casitas B-lineage lymphoma b                        | NM_001033238.1   |
| 37 | Gene Nfkbiz       | INAP, AA4088: nuclear factor of kappa light polypeptide gene enha   | NM_030612.3, NM  |
| 52 | Gene Gm6958       | Gm6958 predicted gene 6958                                          | XM_001479180.1,  |
| 52 | Gene Rpl24        | 0610008L05Ri ribosomal protein L24                                  | NM_024218.4      |
| 52 | Gene 2310061      | 2310061J03Ri RIKEN cDNA 2310061J03 gene                             | NR_027965.1      |
| 52 | Gene Zbtb11       | Zbtb11, 92301 zinc finger and BTB domain containing 11              | NM_173026.2      |
| 29 | Gene Pcpn         | 1110018D06Ri PEST proteolytic signal containing nuclear protein     | NM_001024622.2   |
| 29 | Gene Trmt10c      | 1300018J16Ri tRNA methyltransferase 10C                             | NM_029092.3      |
| 37 | Gene Tomm70       | Tom70, D16lu translocase of outer mitochondrial membrane 70 hc      | NM_138599.5      |
| 39 | Gene Nit2         | Nit2, 1190017I nitrilase family, member 2                           | NM_023175.1      |
| 39 | Gene Gm1689       | Gm1689 predicted gene, 16892                                        | XR_106988.1, XR_ |
| 39 | Gene Tbc1d23      | AU043671, 49: TBC1 domain family, member 23                         | NM_026254.2      |
| 23 | Gene Dcbld2       | AW146002, Es discoidin, CUB and LCCL domain containing 2            | NM_028523.3      |
| 31 | Gene St3gal6      | AI930218, St3: ST3 beta-galactoside alpha-2,3-sialyltransferase 6   | NM_018784.2      |
| 22 | Gene Cpox         | Cpox, Cpo, HCl coproporphyrinogen oxidase                           | NM_007757.2      |
| 24 | Gene 4930453      | 4930453N24Ri RIKEN cDNA 4930453N24 gene                             | NM_026273.2      |
| 24 | Gene Zfp654       | Zfp654, 18100 zinc finger protein 654                               | NM_028059.2      |
| 23 | Gene LOC100861916 | zinc finger protein 292-like                                        | XM_003688940.1,  |
| 23 | Gene Cggbp1       | AA960172, AL(CGG triplet repeat binding protein 1                   | NM_178647.2      |
| 20 | Gene Chmp2b       | Chmp2b, 1190 charged multivesicular body protein 2B                 | NM_026879.2      |
| 20 | Gene Vgll3        | 1700110N18Ri vestigial like 3 (Drosophila)                          | NM_028572.1      |
| 18 | Gene Gbe1         | 2810426P10Ri glucan (1,4-alpha-), branching enzyme 1                | NM_028803.3      |
| 22 | Gene Robo1        | AW494633, Rc roundabout homolog 1 (Drosophila)                      | NM_019413.2      |
| 23 | Gene Nrip1        | Nrip1, RIP140, nuclear receptor interacting protein 1               | NM_173440.2      |
| 21 | Gene Cxadr        | CAR, MCVADR coxsackie virus and adenovirus receptor                 | NM_009988.3, NM  |
| 29 | Gene Btg3         | ANA, Btg3, tob B cell translocation gene 3                          | NM_009770.2      |
| 28 | Gene D16Ert       | 1700010I10Ri DNA segment, Chr 16, ERATO Doi 472, expressed          | NM_001252438.1   |
| 25 | Gene Mrpl39       | C21orf8, Rplm: mitochondrial ribosomal protein L39                  | NM_017404.4      |
| 28 | Gene Jam2         | JAM-2, 24101: junction adhesion molecule 2                          | NM_023844.5      |
| 28 | Gene Atp5j        | Atp5j ATP synthase, H+ transporting, mitochondrial F0 cor           | NM_016755.2      |
| 28 | Gene Gabpa        | GABPalpha, G: GA repeat binding protein, alpha                      | NM_008065.2      |
| 42 | Gene App          | Abeta, Ag, Ada amyloid beta (A4) precursor protein                  | NM_001198823.1   |
| 35 | Gene Adamts1      | METH-1, MET: a disintegrin-like and metallopeptidase (reprolysin t  | NM_009621.4      |

|    |              |                 |                                                             |                  |
|----|--------------|-----------------|-------------------------------------------------------------|------------------|
| 28 | Gene Adamts5 | ASMP-2, 95300a  | disintegrin-like and metallopeptidase (reprolysin t         | NM_011782.2      |
| 26 | Gene Usp16   | Usp16, 120000   | ubiquitin specific peptidase 16                             | NM_024258.2      |
| 40 | Gene Cct8    | Cctq, A132397   | chaperonin containing Tcp1, subunit 8 (theta)               | NM_009840.3      |
| 40 | Gene B130034 | B130034C11Ri    | RIKEN cDNA B130034C11 gene                                  | NR_040375.1      |
| 26 | Gene Bach1   | 6230421P05Ri    | BTB and CNC homology 1                                      | NM_007520.2      |
| 26 | Gene Gm1078  | ENSMUSG000      | predicted gene 10789                                        | NR_033476.1      |
| 29 | Gene Sod1    | Ipo1, Sod-1, Sc | superoxide dismutase 1, soluble                             | NM_011434.1      |
| 38 | Gene Scaf4   | AA517739, Sra   | SR-related CTD-associated factor 4                          | NM_178923.3      |
| 21 | Gene Hunk    | Bstk1, Hunk, N  | hormonally upregulated Neu-associated kinase                | NM_015755.2      |
| 28 | Gene Urb1    | 5730405K23Ri    | URB1 ribosome biogenesis 1 homolog ( <i>S. cerevisiae</i> ) | NM_029497.1      |
| 30 | Gene 1110004 | 1110004E09Rik   |                                                             | NM_026502.2      |
| 30 | Gene Synj1   | A930006D20Ri    | synaptojanin 1                                              | NM_001045515.1   |
| 30 | Gene 4930404 | 4930404I05Rik   | RIKEN cDNA 4930404I05 gene                                  | NR_028368.1      |
| 30 | Gene Paxbp1  | Gcfc, C21orf66  | PAX3 and PAX7 binding protein 1                             | NM_026110.2      |
| 18 | Gene Olig2   | RK17, Bhlhb1,   | oligodendrocyte transcription factor 2                      | NM_016967.2      |
| 34 | Gene Ifnar2  | A1747302, Ifna  | interferon (alpha and beta) receptor 2                      | NM_001110498.1   |
| 20 | Gene Il10rb  | CRF2-4, IL-10R  | interleukin 10 receptor, beta                               | NM_008349.5      |
| 27 | Gene Ifngr2  | Ifngr2, Ifg     | interferon gamma receptor 2                                 | NM_008338.3      |
| 23 | Gene Tmem50  | B230114J08Ri    | transmembrane protein 50B                                   | NM_030018.3      |
| 33 | Gene Gart    | Prgs, Gaps, Ga  | phosphoribosylglycinamide formyltransferase                 | NM_010256.2      |
| 33 | Gene Son     | AA409051, 29    | Son DNA binding protein                                     | NM_178880.4, NM  |
| 17 | Gene Donson  | A1845729, ORF   | downstream neighbor of SON                                  | NM_021720.1      |
| 17 | Gene Gm1078  | Gm10785, ENS    | predicted gene 10785                                        | NR_040389.1      |
| 17 | Gene Cryz1   | Cryz1, 241000   | crystallin, zeta (quinone reductase)-like 1                 | NM_133679.2, NM  |
| 43 | Gene Slc5a3  | Slc5a3, AA623   | solute carrier family 5 (inositol transporters), memb       | NM_017391.3      |
| 43 | Gene Mrps6   | AW046321, M     | mitochondrial ribosomal protein S6                          | NM_080456.1      |
| 22 | Gene Rcan1   | Rcan1, RCN1,    | regulator of calcineurin 1                                  | NM_019466.3, NM  |
| 21 | Gene Runx1   | Pebpa2b, A146   | runt related transcription factor 1                         | NM_009821.2, NM  |
| 26 | Gene Dopey2  | C21orf5, A150   | dopey family member 2                                       | NM_026700.2, NM  |
| 25 | Gene Morc3   | 1110051N18Ri    | microrchidia 3                                              | NM_001045529.3   |
| 22 | Gene Chaf1b  | CAF1P60, MPF    | chromatin assembly factor 1, subunit B (p60)                | NM_028083.4      |
| 18 | Gene Sim2    | Sim2, bHLHe1    | single-minded homolog 2 ( <i>Drosophila</i> )               | NM_011377.2      |
| 31 | Gene Pigp    | Dscr5, Pigp, Dc | phosphatidylinositol glycan anchor biosynthesis, cla        | NM_019543.3, NM  |
| 31 | Gene Ttc3    | Ttc3, KIAA411   | tetratricopeptide repeat domain 3                           | NM_009441.2      |
| 21 | Gene Dyrk1a  | Dyrk, ENSMUS    | dual-specificity tyrosine-(Y)-phosphorylation regulat       | NM_007890.2, NM  |
| 34 | Gene Ets2    | AU022856, Ets   | E26 avian leukemia oncogene 2, 3' domain                    | NM_011809.3      |
| 38 | Gene Brwd1   | Brwd1, D5300    | bromodomain and WD repeat domain containing 1               | NM_145125.3, NM  |
| 38 | Gene 1700093 | 1700093J21Ri    | RIKEN cDNA 1700093J21 gene                                  | XR_141303.1, XR_ |
| 29 | Gene Hmgn1   | Hmgn1, MGC1     | high mobility group nucleosomal binding domain 1            | NM_008251.3      |
| 22 | Gene Wrb     | 5530402J05Ri    | tryptophan rich basic protein                               | NM_207301.2      |
| 36 | Gene Lca5l   | Lca5l, 492152   | Leber congenital amaurosis 5-like                           | NM_001001492.2   |
| 36 | Gene Sh3bgr  | 5430437A18Ri    | SH3-binding domain glutamic acid-rich protein               | NM_015825.2      |
| 21 | Gene Bace2   | ARP1, CDA13,    | beta-site APP-cleaving enzyme 2                             | NM_019517.4      |
| 22 | Gene Prdm15  | Zfp298, Prdm1   | PR domain containing 15                                     | NM_144789.2      |
| 25 | Gene C2cd2   | 5730563M15,     | C2 calcium-dependent domain containing 2                    | NM_174847.2      |
| 23 | Gene A230045 | A230045G11R     | RIKEN cDNA A230045G11 gene                                  | XR_105811.2      |
| 23 | Gene Scaf8   | Rbm16, A1448    | SR-related CTD-associated factor 8                          | NM_134123.3      |

|    |                   |                                                                    |                  |
|----|-------------------|--------------------------------------------------------------------|------------------|
| 24 | Gene Arid1b       | Ardi1b, mKIAA AT rich interactive domain 1B (SWI-like)             | NM_001085355.1   |
| 35 | Gene LOC101055715 | uncharacterized LOC101055715                                       | XM_003945565.1   |
| 35 | Gene Zdhhc14      | Zdhhc14, MGC zinc finger, DHHC domain containing 14                | NM_146073.3      |
| 21 | Gene Snx9         | SH3PX1, Snx9, sorting nexin 9                                      | NM_025664.5      |
| 29 | Gene Synj2        | AI481647, SJ2, synaptojanin 2                                      | NM_011523.2, NM  |
| 29 | Gene Serac1       | 4930511N22Ri serine active site containing 1                       | NM_177311.4, NM  |
| 29 | Gene Gtf2h5       | 2810432H05Ri general transcription factor IIH, polypeptide 5       | NM_181392.3      |
| 27 | Gene Ezr          | MGC107499, Fezrin                                                  | NM_009510.2      |
| 30 | Gene Mpc1         | MGC117549, 3830411118Rik, MPC1, Brp44l, 0610006G08Rik, Mpc1        | NM_018819.4      |
| 31 | Gene 4930506      | 4930506C21Ri RIKEN cDNA 4930506C21 gene                            | XR_168553.1, XR_ |
| 31 | Gene Sft2d1       | Sft2d1, AA409 SFT2 domain containing 1                             | NM_134114.2      |
| 18 | Gene Prr18        | Prr18, 963001 proline rich region 18                               | NM_178774.4, NR  |
| 37 | Gene Qk           | l17Wis1, 1500 quaking                                              | NM_021881.2, NM  |
| 37 | Gene LOC101055707 | uncharacterized LOC101055707                                       | XM_003945568.1   |
| 37 | Gene B930003      | B930003M22R RIKEN cDNA B930003M22 gene                             | NR_037588.1      |
| 37 | Gene 1700110      | 1700110C19Ri RIKEN cDNA 1700110C19 gene                            | NR_045461.1      |
| 25 | Gene Igf2r        | CD222, Mpr30 insulin-like growth factor 2 receptor                 | NM_010515.2      |
| 25 | Gene Airn         | AI256653, 281 antisense Igf2r RNA                                  | NR_027772.1, NR_ |
| 33 | Gene Pnlc1        | FLJ35820, Pnlc poly(A)-specific ribonuclease (PARN)-like domain co | NM_001034866.1   |
| 33 | Gene Mrpl18       | Mrpl18, 10100 mitochondrial ribosomal protein L18                  | NM_026310.3      |
| 33 | Gene Tcp1         | Tp63, AI52877 t-complex protein 1                                  | NM_013686.3      |
| 33 | Gene Snora20      | MBI-125, Snor small nucleolar RNA, H/ACA box 20                    | NR_028479.1      |
| 33 | Gene Acat3        | ACTL, Acat3 acetyl-Coenzyme A acetyltransferase 3                  | NM_153151.3      |
| 27 | Gene Acat2        | Acat2, AW742 acetyl-Coenzyme A acetyltransferase 2                 | NM_009338.3      |
| 27 | Gene Gm1594       | Gm15946, OT predicted gene 15946                                   | XM_003086038.1,  |
| 32 | Gene Wtap         | 9430038B09Ri Wilms' tumour 1-associating protein                   | NM_175394.2, NM  |
| 32 | Gene Sod2         | Sod2, MnSOD, superoxide dismutase 2, mitochondrial                 | NM_013671.3      |
| 32 | Gene Tcte2        | Tcte2, AI4292 t-complex-associated testis expressed 2              | NM_022311.2      |
| 32 | Gene Mllt4        | 5033403D15Ri myeloid/lymphoid or mixed-lineage leukemia (trithc    | NM_010806.1      |
| 39 | Gene Smoc2        | 1700056C05Ri SPARC related modular calcium binding 2               | NM_022315.2      |
| 28 | Gene Wdr27        | Wdr27, 06100 WD repeat domain 27                                   | NM_175173.3      |
| 28 | Gene 1600012      | 1600012H06Ri RIKEN cDNA 1600012H06 gene                            | NM_001083881.1   |
| 28 | Gene Phf10        | 1810055P05Ri PHD finger protein 10                                 | NM_024250.4      |
| 28 | Gene LOC106740    | uncharacterized LOC106740                                          | NR_027905.1      |
| 20 | Gene Dll1         | Delta1, Dll1 delta-like 1 (Drosophila)                             | NM_007865.3      |
| 22 | Gene Psmb1        | C81484, AA40 proteasome (prosome, macropain) subunit, beta type    | NM_011185.3      |
| 24 | Gene Tbp          | GTF2D1, TFIID, TATA box binding protein                            | NM_013684.3      |
| 24 | Gene Pdcd2        | RP-8, Pdcd2, A programmed cell death 2                             | NM_008799.2      |
| 24 | Gene 5830433      | 5830433I10Rik RIKEN cDNA 5830433I10 gene                           | XM_003945578.1   |
| 24 | Gene Chd1         | 4930525N21Ri chromodomain helicase DNA binding protein 1           | NM_007690.3      |
| 26 | Gene Rgmb         | DRAGON, Rgm RGM domain family, member B                            | NM_178615.3      |
| 31 | Gene Lnpep        | gp160, 20103C leucyl/cystinyl aminopeptidase                       | NM_172827.3      |
| 23 | Gene Casp16       | Casp14l, EG38 caspase 16, apoptosis-related cysteine peptidase     | XM_003945579.1,  |
| 23 | Gene Zfp213       | Zfp213, D17Eri zinc finger protein 213                             | NM_001033496.3   |
| 28 | Gene 1520401      | 1520401A03Ri RIKEN cDNA 1520401A03 gene                            | XM_003085154.2   |
| 28 | Gene Pkmyt1       | 6230424P17, P protein kinase, membrane associated tyrosine/thre    | NM_023058.3      |
| 28 | Gene Paqr4        | Paqr4, 150000 progesterin and adipoQ receptor family member IV     | NM_023824.3      |

|    |               |              |                                                              |                 |
|----|---------------|--------------|--------------------------------------------------------------|-----------------|
| 26 | Gene Kremen2  | 2900054E04Ri | kringle containing transmembrane protein 2                   | NM_028416.2     |
| 26 | Gene 9530082  | E030034P13Ri | RIKEN cDNA 9530082P21 gene                                   | NR_015472.1     |
| 22 | Gene Flywch1  | E030034P13Ri | FLYWCH-type zinc finger 1                                    | NM_153791.2     |
| 22 | Gene Flywch2  | AW548203,    | 28 FLYWCH family member 2                                    | NM_029798.3     |
| 20 | Gene Srrm2    | AA410130,    | 50: serine/arginine repetitive matrix 2                      | NM_175229.3     |
| 20 | Gene Mir5125  | mmu-mir-5125 | microRNA 5125                                                | NR_039586.1     |
| 20 | Gene Tceb2    | 0610040H15Ri | transcription elongation factor B (SIII), polypeptide 2      | NM_026305.2     |
| 20 | Gene Prss33   | MGC123869,   | 1: protease, serine, 33                                      | NM_001081399.2  |
| 20 | Gene Prss41   | Tessp-1,     | 49314: protease, serine, 41                                  | NM_027644.1     |
| 19 | Gene Kctd5    | mKIAA0176,   | 2: potassium channel tetramerisation domain containi         | NM_027008.2     |
| 38 | Gene Pdpk1    | Pdpk1,       | Pdk1 3-phosphoinositide dependent protein kinase 1           | NM_001080773.1  |
| 31 | Gene Amdhd2   | 5730457F11Ri | amidohydrolase domain containing 2                           | NM_172935.4     |
| 31 | Gene Atp6v0c  | Atpl,        | Atpl-rs1, ATPase, H+ transporting, lysosomal V0 subunit C    | NM_009729.3     |
| 32 | Gene Tbc1d24  | C530046L02Ri | TBC1 domain family, member 24                                | NM_001163847.1, |
| 32 | Gene Ntn3     | Ntn3,        | Ntn2  netrin 3                                               | NM_010947.3     |
| 32 | Gene 1600002  | 1600002H07Ri | RIKEN cDNA 1600002H07 gene                                   | NM_028056.1     |
| 25 | Gene Ccnf     | CycF,        | Ccnf, Fbx cyclin F                                           | NM_007634.4     |
| 23 | Gene Abca17   | Abca17       | ATP-binding cassette, sub-family A (ABC1), member            | NM_001031621.2  |
| 69 | Gene Abca3    | MGC90532,    | A: ATP-binding cassette, sub-family A (ABC1), member         | NM_013855.2, NM |
| 69 | Gene D330041  | D330041H03R  | RIKEN cDNA D330041H03 gene                                   | NR_033554.1     |
| 69 | Gene Rnps1    | Rnps1        | ribonucleic acid binding protein S1                          | NM_001080127.1, |
| 50 | Gene Pgp      | Pgp,         | AI481330 phosphoglycolate phosphatase                        | NM_025954.3     |
| 50 | Gene Mlst8    | AI505104,    | AA4 MTOR associated protein, LST8 homolog (S. cerevisi       | NM_001252463.1  |
| 50 | Gene Bricd5   | Bricd5,      | 993002: BRICHOS domain containing 5                          | NM_175682.3     |
| 36 | Gene Caskin1  | mKIAA1306,   | C CASK interacting protein 1                                 | NM_027937.2     |
| 31 | Gene Pkd1     | PC1,         | FLJ00285, polycystic kidney disease 1 homolog                | NM_013630.2     |
| 27 | Gene Tsc2     | Nafld,       | Tsc2, Tc tuberous sclerosis 2                                | NM_011647.2, NM |
| 27 | Gene Nthl1    | Octs3,       | Nthl1, Nth (endonuclease III)-like 1 (E.coli)                | NM_008743.2     |
| 27 | Gene Slc9a3r2 | 2010007A20Ri | solute carrier family 9 (sodium/hydrogen exchanger           | NM_023449.3, NM |
| 22 | Gene Npw      | Npw,         | Gm935 neuropeptide W                                         | NM_001099664.1  |
| 33 | Gene Zfp598   | Ntrap,       | Znf598, zinc finger protein 598                              | NM_183149.1     |
| 27 | Gene Syngr3   | Syng3        |                                                              | NM_011522.3     |
| 27 | Gene Gfer     | Alr,         | ERV1, Gfer growth factor, erv1 (S. cerevisiae)-like (augm    | NM_023040.3     |
| 27 | Gene Noxo1    | Snx28,       | Noxo1, NADPH oxidase organizer 1                             | NM_027988.4     |
| 27 | Gene Tbl3     | 9430070M15R  | transducin (beta)-like 3                                     | NM_145396.4     |
| 49 | Gene Rnf151   | Rnf151,      | 17000 ring finger protein 151                                | NM_026205.3     |
| 49 | Gene Snhg9    | 1700072N11Ri | small nucleolar RNA host gene (non-protein coding)           | NR_027900.2     |
| 49 | Gene Snora78  | Snora78,     | ACA: small nucleolar RNA, H/ACA box 7                        | NR_028515.1     |
| 49 | Gene Rps2     | MGC118037,   | L ribosomal protein S2                                       | NM_008503.5     |
| 49 | Gene Snora64  | MBI-29,      | Rnu64 small nucleolar RNA, H/ACA box 64                      | NR_002897.1     |
| 49 | Gene Ndufb1C  | PDSW,        | Ndufb1 NADH dehydrogenase (ubiquinone) 1 beta subcomp        | NM_026684.2     |
| 49 | Gene Rpl3l    | 1110057H16Ri | ribosomal protein L3-like                                    | NM_001163945.1, |
| 26 | Gene Igfals   | KIAA4111,    | Alb: insulin-like growth factor binding protein, acid labile | NM_008340.3     |
| 30 | Gene Nubp2    | Nubp2,       | D17W: nucleotide binding protein 2                           | NM_011956.3     |
| 30 | Gene Spsb3    | SSB3,        | 3300001 splA/ryanodine receptor domain and SOCS box cont     | NM_027141.2, NM |
| 30 | Gene Eme2     | 2810013J18Ri | essential meiotic endonuclease 1 homolog 2 (S. pom           | NM_001163102.1  |
| 30 | Gene Mrps34   | Tce2,        | 5330430 mitochondrial ribosomal protein S34                  | NM_023260.1     |

|    |               |                                                      |                                                          |                  |
|----|---------------|------------------------------------------------------|----------------------------------------------------------|------------------|
| 30 | Gene Nme3     | AI413736, Nm                                         | NME/NM23 nucleoside diphosphate kinase 3                 | NM_019730.2      |
| 30 | Gene Mapk8ip  | JSAP1a, JSAP1                                        | mitogen-activated protein kinase 8 interacting prote     | NM_013931.4, NM  |
| 33 | Gene Hn1l     | C16orf34, ALO                                        | hematological and neurological expressed 1-like          | NM_198937.2      |
| 33 | Gene Cramp1l  | 5830477H08Ri                                         | Crm, cramped-like (Drosophila)                           | NM_020608.3      |
| 28 | Gene Ift140   | Tce5, mKIAA0590, Ift140, Wdte2, AI661311, MGC170632  |                                                          | NM_134126.3      |
| 29 | Gene Ptx4     | Ptx4, 1110018                                        | pentraxin 4                                              | NM_026747.1, NM  |
| 29 | Gene Clcn7    | AA409691, AV                                         | chloride channel 7                                       | NM_011930.3      |
| 29 | Gene BC00396  | BC003965, Ccs                                        | cDNA sequence BC003965                                   | NM_183150.2      |
| 29 | Gene Unkl     | 1300004G08Ri                                         | unkempt-like (Drosophila)                                | NM_028789.3, NM  |
| 29 | Gene Gnptg    | Tce7, 6430527                                        | N-acetylglucosamine-1-phosphotransferase, gamma          | NM_172529.3      |
| 29 | Gene Tsr3     | MGC113771, 1TSR3                                     | 20S rRNA accumulation                                    | NM_026676.3, NM  |
| 29 | Gene Baiap3   | Baiap3, Bap3, BAI1                                   | -associated protein 3                                    | NM_001163270.1   |
| 35 | Gene Ube2i    | Ube2i, UBC9, U                                       | ubiquitin-conjugating enzyme E2I                         | NM_001177609.1   |
| 35 | Gene Gm1780   | Gm17801                                              | predicted gene, 17801                                    | NR_027452.1      |
| 27 | Gene Cacna1h  | alpha13.2, MN                                        | calcium channel, voltage-dependent, T type, alpha 1      | NM_021415.4, NM  |
| 38 | Gene Sox8     | Sox8                                                 | SRY-box containing gene 8                                | NM_011447.3      |
| 38 | Gene 2810468  | 2810468N07Ri                                         | RIKEN cDNA 2810468N07 gene                               | NR_045176.1      |
| 38 | Gene Lmf1     | Lmf1, Tmem11                                         | lipase maturation factor 1                               | NM_029624.4, NR  |
| 31 | Gene Fbxl16   | BC042620, Fbx                                        | F-box and leucine-rich repeat protein 16                 | NM_001164225.1   |
| 31 | Gene Wdr24    | BC037651, MCWD                                       | repeat domain 24                                         | NM_173741.3      |
| 31 | Gene Jmjd8    | Jmjd8, 261000                                        | jumonji domain containing 8                              | NM_028101.4      |
| 31 | Gene Stub1    | 2310040B03Ri                                         | STIP1 homology and U-Box containing protein 1            | NM_019719.3      |
| 38 | Gene Rhbdl1   | Rhbdl, Rhbdl1, rhomboid, veinlet-like 1 (Drosophila) |                                                          | NM_144816.1      |
| 38 | Gene Rhot2    | Miro2, Arht2, Iras                                   | homolog gene family, member T2                           | NM_145999.2      |
| 38 | Gene Wdr90    | AI551153, 323                                        | WD repeat domain 90                                      | NM_001163766.1   |
| 37 | Gene Fam195   | 9530058B02Ri                                         | family with sequence similarity 195, member A            | NM_026633.3      |
| 37 | Gene 0610011  | 0610011F06Ri                                         | RIKEN cDNA 0610011F06 gene                               | NM_026686.2      |
| 37 | Gene Wfikkn1  | Wfikkn1, Wfikl                                       | WAP, FS, Ig, KU, and NTR-containing protein 1            | NM_001100454.1   |
| 28 | Gene Rab40c   | Rab40c, RAR3                                         | Rab40c, member RAS oncogene family                       | NM_139154.2      |
| 24 | Gene Pigq     | Gpi1h, Gpi1, G                                       | phosphatidylinositol glycan anchor biosynthesis, cla     | NM_011822.3      |
| 37 | Gene 1700022  | 1700022N22Ri                                         | RIKEN cDNA 1700022N22 gene                               | XR_107052.1, XR_ |
| 37 | Gene Rab11fip | MGC47508, m                                          | RAB11 family interacting protein 3 (class II)            | NM_153140.2, NM  |
| 19 | Gene Decr2    | Decr2                                                | 2-4-dienoyl-Coenzyme A reductase 2, peroxisomal          | NM_011933.2      |
| 19 | Gene Nme4     | 2610027N22Ri                                         | NME/NM23 nucleoside diphosphate kinase 4                 | NM_019731.1      |
| 19 | Gene Gm8186   | Gm8186, EG6                                          | small nuclear ribonucleoprotein polypeptide G pseudogene |                  |
| 44 | Gene Itfg3    | AI429612, Itfg                                       | integrin alpha FG-GAP repeat containing 3                | NM_207217.4, NM  |
| 44 | Gene Luc7l    | Luc7l, 241001                                        | Luc7 homolog (S. cerevisiae)-like                        | NM_028190.3, NM  |
| 20 | Gene Neurl1b  | MGC183777, N                                         | neuralized homolog 1b (Drosophila)                       | NM_001081656.2   |
| 38 | Gene Dusp1    | MKP1, erp, Ptp                                       | dual specificity phosphatase 1                           | NM_013642.3      |
| 26 | Gene Ergic1   | 1200007D18Ri                                         | endoplasmic reticulum-golgi intermediate compartn        | NM_026170.3      |
| 30 | Gene Atp6v0e  | Atp6k, M9.2, A                                       | ATPase, H+ transporting, lysosomal V0 subunit E          | NM_025272.2      |
| 32 | Gene Crebrf   | Crebrf, A930001N09Rik, LRF                           |                                                          | NM_029870.2      |
| 22 | Gene Nkx2-5   | Csx, Nkx-2.5, ti                                     | NK2 transcription factor related, locus 5 (Drosophila    | NM_008700.2      |
| 27 | Gene Kifc5b   | HSET, Kifc5b, Kifc5a, KNSL2, Kifc1, MGC76666, Hset   |                                                          | NM_053173.2      |
| 27 | Gene Phf1     | PHF2, Phf1, AV                                       | PHD finger protein 1                                     | NM_009343.2      |
| 27 | Gene Cuta     | AI326454, 181                                        | cutA divalent cation tolerance homolog (E. coli)         | NM_026307.2, NM  |
| 27 | Gene Syngap1  | Syngap, Synga                                        | synaptic Ras GTPase activating protein 1 homolog (r      | XM_915205.3, XM  |



|    |                   |                                                                   |                  |
|----|-------------------|-------------------------------------------------------------------|------------------|
| 25 | Gene Zbtb9        | Zbtb9, 393040 zinc finger and BTB domain containing 9             | NM_001005916.2   |
| 18 | Gene Grm4         | Gprc1d, Grm4, glutamate receptor, metabotropic 4                  | NM_001013385.1   |
| 23 | Gene Hmga1        | AL023995, Hm high mobility group AT-hook 1                        | NM_001166539.1,  |
| 23 | Gene AI41358      | MGC41609, AI expressed sequence AI413582                          | NM_001002895.2   |
| 28 | Gene Nudt3        | Dipp, 1110011 nudix (nucleotide diphosphate linked moiety X)-type | NM_019837.2      |
| 44 | Gene Rps10        | 2210402A09Ri ribosomal protein S10                                | NM_025963.3      |
| 25 | Gene D17Wsu       | C80239, C030C DNA segment, Chr 17, Wayne State University 92, e   | NM_001033279.2,  |
| 37 | Gene Snrpc        | U1C, U1-C, Snr U1 small nuclear ribonucleoprotein C               | NM_011432.2      |
| 37 | Gene Uhrf1bp      | mKIAA4127, KI UHRF1 (ICBP90) binding protein 1                    | NM_001080769.1   |
| 35 | Gene Taf11        | 28kDa, PRO21.TAF11 RNA polymerase II, TATA box binding protein    | NM_026836.2      |
| 35 | Gene Anks1        | Anks1, mKIAA(ankyrin repeat and SAM domain containing 1           | NM_181413.3      |
| 24 | Gene Scube3       | Scube3, D030C signal peptide, CUB domain, EGF-like 3              | NM_001004366.1   |
| 24 | Gene C230013      | C230013L11Ri RIKEN cDNA C230013L11 gene                           | XR_140415.2, XR_ |
| 24 | Gene Zfp523       | BC025615, Znf zinc finger protein 523                             | NM_172617.3      |
| 53 | Gene Fance        | Fance, 281045 Fanconi anemia, complementation group E             | NM_001163819.1   |
| 53 | Gene Rpl10a       | CsA-19, Rpl10a ribosomal protein L10A                             | NM_011287.2      |
| 53 | Gene Tead3        | ETFR-1, Tead3, TEA domain family member 3                         | NM_001098226.3   |
| 29 | Gene Tulp1        | Tulp1, Tulp1 tubby like protein 1                                 | NM_021478.1      |
| 23 | Gene Fkbp5        | Dit1, FKBP-5, 5 FK506 binding protein 5                           | NM_010220.3      |
| 27 | Gene LOC100862287 | uncharacterized LOC100862287                                      | XR_140416.1, XR_ |
| 27 | Gene E230001      | E230001N04Ri RIKEN cDNA E230001N04 gene                           | XR_105891.3, XR_ |
| 27 | Gene Armc12       | Armc12, AV04 armadillo repeat containing 12                       | NM_026290.3      |
| 25 | Gene Srpk1        | AU017960, Srp serine/arginine-rich protein specific kinase 1      | NM_016795.3      |
| 37 | Gene Slc26a8      | MGC38861, Slc solute carrier family 26, member 8                  | XM_003085521.1,  |
| 37 | Gene Mapk14       | p38-alpha, p38 mitogen-activated protein kinase 14                | NM_011951.3, NM  |
| 25 | Gene Brpf3        | AI413466, Brp bromodomain and PHD finger containing, 3            | NM_001081315.1   |
| 25 | Gene Pxt1         | Stepp, Pxt1, 17 peroxisomal, testis specific 1                    | NM_153390.1      |
| 25 | Gene Kctd20       | Kctd20, AW54 potassium channel tetramerisation domain containi    | NM_025888.5      |
| 26 | Gene Stk38        | Ndr1, Stk38, 5 serine/threonine kinase 38                         | NM_134115.2      |
| 28 | Gene Srsf3        | X16, AL024116 serine/arginine-rich splicing factor 3              | NM_013663.5, NR  |
| 22 | Gene Cdkn1a       | Waf1, mda6, P cyclin-dependent kinase inhibitor 1A (P21)          | NM_007669.4, NM  |
| 24 | Gene Cpne5        | MGC47475, Cp copine V                                             | NM_153166.2      |
| 18 | Gene Ppil1        | 1110060O10Ri peptidylprolyl isomerase (cyclophilin)-like 1        | NM_026845.4      |
| 18 | Gene BC00400      | MGC7550, 24C cDNA sequence BC004004                               | NM_030561.3      |
| 43 | Gene Pim1         | Pim1, Pim-1 proviral integration site 1                           | NM_008842.3      |
| 20 | Gene Tmem21       | 14933413N12Ri transmembrane protein 217                           | NM_001162901.1   |
| 24 | Gene Tbc1d22      | BC045600, MCTBC1 domain family, member 22B                        | NM_198647.1      |
| 24 | Gene Rnf8         | AIP37, Rnf8, 3 ring finger protein 8                              | NM_021419.1      |
| 42 | Gene Gm2016       | Gm20161 predicted gene, 20161                                     | XR_107056.1, XR_ |
| 42 | Gene Ftsjd2       | MTr1, Ftsjd2, r FtsJ methyltransferase domain containing 2        | NM_028791.5      |
| 36 | Gene Mdga1        | 1200011I03Ri MAM domain containing glycosylphosphatidylinosit     | NM_001081160.1   |
| 27 | Gene Zfand3       | TEG-27, MGC1 zinc finger, AN1-type domain 3                       | NM_148926.2      |
| 22 | Gene Slc37a1      | MGC28167, G solute carrier family 37 (glycerol-3-phosphate transp | NM_153062.2, NM  |
| 22 | Gene Pde9a        | Pde9a, PDE9A: phosphodiesterase 9A                                | NM_008804.4, NM  |
| 37 | Gene Wdr4         | Wdr4, AI44834 WD repeat domain 4                                  | NM_021322.2      |
| 37 | Gene Ndufv3       | Ndufv3, 15000 NADH dehydrogenase (ubiquinone) flavoprotein 3      | NM_001083891.1   |
| 34 | Gene Pknox1       | D17Wsu76e, P Pbx/knotted 1 homeobox                               | NM_016670.3, NR  |

|    |              |                                                                      |                  |
|----|--------------|----------------------------------------------------------------------|------------------|
| 21 | Gene Cbs     | AI303044, MG cystathionine beta-synthase                             | NM_144855.2, NM  |
| 21 | Gene U2af1   | U2af1, 201010 U2 small nuclear ribonucleoprotein auxiliary factor (  | NM_024187.4, NM  |
| 42 | Gene Sik1    | Sik1, Sik, Msk, salt inducible kinase 1                              | NM_010831.2      |
| 31 | Gene Hsf2bp  | Hsf2bp, 49324 heat shock transcription factor 2 binding protein      | NM_028902.1      |
| 31 | Gene Rrp1b   | Kiaa0179, mKl. ribosomal RNA processing 1 homolog B (S. cerevisia    | NM_028244.2, NM  |
| 18 | Gene Notch3  | hpbk, N3, Notch3, AW229011                                           | NM_008716.2      |
| 16 | Gene Ephx3   | 2310063B19Ri epoxide hydrolase 3                                     | NM_001033163.3   |
| 31 | Gene Brd4    | HUNK1, MCAP bromodomain containing 4                                 | NM_198094.2, NM  |
| 25 | Gene Akap8   | AU015639, Ak: A kinase (PRKA) anchor protein 8                       | NM_019774.4      |
| 25 | Gene Akap8l  | Nakap95, Akaç A kinase (PRKA) anchor protein 8-like                  | NM_017476.2      |
| 21 | Gene Cyp4f39 | Cyp4f39, 4732 cytochrome P450, family 4, subfamily f, polypeptide    | NM_177307.3      |
| 20 | Gene Zfp799  | 6030490I01Rik zinc finger protein 799                                | NM_177359.4      |
| 23 | Gene Zfp472  | Zfp472, KRIM-: zinc finger protein 472                               | NM_153063.3      |
| 26 | Gene Zfp101  | AI316498, AI3: zinc finger protein 101                               | NM_009542.2      |
| 31 | Gene Hnrnrm  | Hnrnrm, mKIA heterogeneous nuclear ribonucleoprotein M               | NM_029804.3, NM  |
| 31 | Gene March2  | 9530046H09Ri membrane-associated ring finger (C3HC4) 2               | NM_001252480.1   |
| 25 | Gene Angptl4 | Pgar, Fiaf, Ng2 angiopoietin-like 4                                  | NM_020581.2      |
| 27 | Gene Kank3   | Kank3, D17Ert: KN motif and ankyrin repeat domains 3                 | NM_030697.2      |
| 27 | Gene Rps28   | Rps28 ribosomal protein S28                                          | NM_016844.2      |
| 27 | Gene Ndufa7  | Ndufa7, 14.5kI NADH dehydrogenase (ubiquinone) 1 alpha subcom        | NM_023202.3      |
| 24 | Gene Kifc1   | HSET, Tctex7, (kinesin family member C1                              | NM_001195298.1   |
| 27 | Gene BC03391 | BC033916 cDNA sequence BC033916                                      | NR_040470.1      |
| 27 | Gene BC05122 | BC051226 cDNA sequence BC051226                                      | NR_045146.1      |
| 27 | Gene Daxx    | MGC150289, [ Fas death domain-associated protein                     | NM_007829.4, NM  |
| 34 | Gene Zbtb22  | AI415166, Zfp: zinc finger and BTB domain containing 22              | NM_020625.3      |
| 34 | Gene Gm1941  | Gm19412 predicted gene, 19412                                        | XM_003945572.1,  |
| 34 | Gene Tapbp   | Tapbp, TPN, D: TAP binding protein                                   | NM_009318.2, NM  |
| 34 | Gene Rgl2    | KE1.5, Rab2l, Fral guanine nucleotide dissociation stimulator-like 2 | NM_009059.2      |
| 34 | Gene H2-Ke2  | H-2Ke2, H2-Ke H2-K region expressed gene 2                           | NM_010385.2, NM  |
| 53 | Gene Wdr46   | C78559, 2310C WD repeat domain 46                                    | NM_020603.2      |
| 53 | Gene B3galt4 | Gal-T2, Galt2,   UDP-Gal:betaGlcNAc beta 1,3-galactosyltransferase,  | NM_019420.2      |
| 53 | Gene Rps18   | Rps18, Ke-3, H ribosomal protein S18                                 | NM_011296.2      |
| 53 | Gene Vps52   | Sacm2l, Vps52 vacuolar protein sorting 52 (yeast)                    | NM_172620.3, XM  |
| 27 | Gene H2-K1   | H2-K1(b), K-f, I histocompatibility 2, K1, K region                  | NM_001001892.2   |
| 34 | Gene Ring1   | Ring1A, Ring1, ring finger protein 1                                 | NM_009066.3      |
| 34 | Gene Mir219- | Mirn219-1, Mi microRNA 219-1                                         | NR_029800.1      |
| 34 | Gene H2-Ke6  | H2-Ke6, D17H(H2-K region expressed gene 6                            | NM_013543.2      |
| 34 | Gene Slc39a7 | MGC143814, Z solute carrier family 39 (zinc transporter), member 7   | NM_001077709.1   |
| 34 | Gene Rxb     | Rub, H-2RIIBP, retinoid X receptor beta                              | NM_011306.4, NM  |
| 29 | Gene Col11a2 | Col11a2                                                              | NM_009926.1      |
| 66 | Gene Gm1945  | Gm19450 predicted gene, 19450                                        | XR_105905.1, XR_ |
| 66 | Gene Brd2    | mKIAA4005, D bromodomain containing 2                                | NM_010238.3, NM  |
| 34 | Gene Notch4  | Notch4, Int3, Int-3, N4                                              | NM_010929.2      |
| 34 | Gene Gpsm3   | AGS4, Gpsm3, G-protein signalling modulator 3 (AGS3-like, C. elega   | NM_134116.5      |
| 34 | Gene Pbx2    | G17, Pbx2, AU pre B cell leukemia homeobox 2                         | NM_017463.2      |
| 34 | Gene Ager    | Ager, RAGE advanced glycosylation end product-specific recepto       | NM_007425.2      |
| 20 | Gene Ppt2    | Ppt2, AA67293 palmitoyl-protein thioesterase 2                       | NM_019441.4      |

|    |                   |                                                                       |                  |
|----|-------------------|-----------------------------------------------------------------------|------------------|
| 20 | Gene Prrt1        | Prrt1, ORF31, I proline-rich transmembrane protein 1                  | NM_030890.1      |
| 27 | Gene Tnxb         | Tnx, tenascin->tenascin XB                                            | NM_031176.2      |
| 32 | Gene Stk19        | RP1, Stk19, G1 serine/threonine kinase 19                             | NM_019442.3      |
| 32 | Gene Dom3z        | NG6, Dom3z DOM-3 homolog Z (C. elegans)                               | NM_033613.2, NM  |
| 32 | Gene Skiv2l       | Ddx13, 493055 superkiller viralicidic activity 2-like (S. cerevisiae) | NM_021337.2      |
| 22 | Gene Nelfe        | Nelfe, D17H6S negative elongation factor complex member E, Rdbp       | NM_138580.2, NM  |
| 22 | Gene Cfb          | H2-Bf, AI25584 complement factor B                                    | NM_008198.2, NM  |
| 24 | Gene Zbtb12       | BC020447, G1(zinc finger and BTB domain containing 12                 | NM_198886.3      |
| 24 | Gene Ehmt2        | D17Erd710e, euchromatic histone lysine N-methyltransferase 2          | NM_145830.1, NM  |
| 21 | Gene 1110038      | 0610009C20Ri RIKEN cDNA 1110038B12 gene                               | NR_027943.1, NR_ |
| 21 | Gene Snord52      | Snord52, MBII: small nucleolar RNA, C/D box 52                        | NR_028527.1      |
| 21 | Gene Hspa1b       | Hsp70.1, Hspa heat shock protein 1B                                   | NM_010478.2      |
| 38 | Gene Hspa1a       | Hspa1a, Hsp70 heat shock protein 1A                                   | NM_010479.2      |
| 38 | Gene Hspa1l       | MGC150263, H heat shock protein 1-like                                | NM_013558.2      |
| 38 | Gene LOC101055816 | uncharacterized LOC101055816                                          | XM_003945746.1,  |
| 38 | Gene Lsm2         | MGC13889, sn LSM2 homolog, U6 small nuclear RNA associated (S.        | NM_030597.3, NM  |
| 48 | Gene Vars         | D17H6S56E, V: valyl-tRNA synthetase                                   | NM_011690.3      |
| 26 | Gene Ly6g5c       | Ly6g5c, G5c, N lymphocyte antigen 6 complex, locus G5C                | NM_148947.1      |
| 26 | Gene Ly6g5b       | Ly6g5b lymphocyte antigen 6 complex, locus G5B                        | NM_148939.2      |
| 26 | Gene Csnk2b       | Csnk2b casein kinase 2, beta polypeptide                              | NM_009975.2      |
| 26 | Gene Gpank1       | Bat-4, G5, D17 G patch domain and ankyrin repeats 1                   | NM_032460.2, NM  |
| 39 | Gene D17H6S       | G4, D17H6S53 DNA segment, Chr 17, human D6S53E                        | NM_033477.2      |
| 39 | Gene Apom         | NG20, 119001 apolipoprotein M                                         | NM_018816.1      |
| 39 | Gene Bag6         | BAG6, Scythe, BCL2-associated athanogene 6                            | NM_001252468.1   |
| 27 | Gene Prrc2a       | Prrc2a, Wbp12 proline-rich coiled-coil 2A                             | NM_020027.3, NM  |
| 27 | Gene Aif1         | AIF-1, Iba1, Aif allograft inflammatory factor 1                      | NM_019467.2      |
| 26 | Gene Lst1         | Lst1, B144 leukocyte specific transcript 1                            | NM_010734.2      |
| 26 | Gene Ltb          | Ltb, Tnfc, Tnfs lymphotoxin B                                         | NM_008518.2      |
| 26 | Gene Tnf          | TNFalpha, DIF, tumor necrosis factor                                  | NM_013693.2      |
| 26 | Gene Lta          | MGC117668, L lymphotoxin A                                            | NM_010735.2      |
| 49 | Gene Nfkbil1      | IKBL, Def-7, Nf nuclear factor of kappa light polypeptide gene enhan  | NM_010909.4      |
| 49 | Gene Atp6v1g      | 1500002D01Ri ATPase, H+ transporting, lysosomal V1 subunit G2         | NM_023179.3      |
| 49 | Gene Ddx39b       | Bat1, D17H6S8 DEAD (Asp-Glu-Ala-Asp) box polypeptide 39B              | NM_019693.3, NM  |
| 18 | Gene H2-D1        | H-2D, H2-D, H: histocompatibility 2, D region locus 1                 | NM_010380.3      |
| 20 | Gene H2-Q6        | Qa-6, H-2Q6, C histocompatibility 2, Q region locus 6                 | NM_207648.1, XM  |
| 22 | Gene Vars2        | mKIAA1885, 1: valyl-tRNA synthetase 2, mitochondrial (putative)       | NM_175137.4      |
| 22 | Gene Gtf2h4       | p44, BTF2 p52, general transcription factor II H, polypeptide 4       | NM_010364.3      |
| 24 | Gene Ddr1         | Ddr1, CD167a, discoidin domain receptor family, member 1              | NM_172962.1, NM  |
| 33 | Gene Flot1        | Flot1, reggie-2 flotillin 1                                           | NM_008027.2      |
| 33 | Gene Tubb5        | AI596182, AA4 tubulin, beta 5 class I                                 | NM_011655.5      |
| 33 | Gene Mdc1         | 6820401C03, r mediator of DNA damage checkpoint 1                     | NM_001010833.2   |
| 25 | Gene 5530401      | 5530401N12Ri RIKEN cDNA 5530401N12 gene                               | XR_107066.1, XR_ |
| 25 | Gene Nrm          | AI429796, Nrr nurim (nuclear envelope membrane protein)               | NM_134122.2      |
| 39 | Gene Ppp1r18      | AI450394, 231 protein phosphatase 1, regulatory subunit 18            | NM_175242.1, NM  |
| 39 | Gene Dhx16        | Ddx16, DBP2, :DEAH (Asp-Glu-Ala-His) box polypeptide 16               | NM_026987.2      |
| 29 | Gene 2310061      | 2310061I04Ri RIKEN cDNA 2310061I04 gene                               | NM_001033630.1   |
| 29 | Gene Atat1        | Mec17, 26100 alpha tubulin acetyltransferase 1                        | NM_028476.4, NM  |

|    |               |                                                                    |                  |
|----|---------------|--------------------------------------------------------------------|------------------|
| 43 | Gene Abcf1    | AU041969, D1 ATP-binding cassette, sub-family F (GCN20), membe     | NM_013854.1      |
| 40 | Gene Mir877   | Mir877, mmu- microRNA 877                                          | NR_030608.1      |
| 43 | Gene Prr3     | 4930540G07Ri proline-rich polypeptide 3                            | NR_028516.1, NR_ |
| 43 | Gene Gnl1     | Gnal1, Gna-rs1guanine nucleotide binding protein-like 1            | NM_008136.2      |
| 37 | Gene Trim39   | mKIAA4179, tf tripartite motif-containing 39                       | NM_024468.2, NM  |
| 15 | Gene Gabbr1   | Gabbr1, GABA gamma-aminobutyric acid (GABA) B receptor, 1          | NM_019439.3      |
| 33 | Gene Cd2ap    | Cd2ap, AL024C CD2-associated protein                               | NM_009847.3      |
| 30 | Gene Tnfrsf21 | TR7, R74815, [ tumor necrosis factor receptor superfamily, membe   | NM_178589.3      |
| 19 | Gene Tdrd6    | AB097085, Tdr tudor domain containing 6                            | NM_198418.2, NM  |
| 24 | Gene Slc25a27 | Slc25a27, D53I solute carrier family 25, member 27                 | NM_028711.3      |
| 24 | Gene Cyp39a1  | Cyp39a1 cytochrome P450, family 39, subfamily a, polypeptic        | NM_018887.3      |
| 25 | Gene Runx2    | AML3, Pebpa2 runt related transcription factor 2                   | NM_001146038.1   |
| 24 | Gene Supt3    | Supt3, SPT3L, / suppressor of Ty 3                                 | NM_178652.2      |
| 25 | Gene Cdc5l    | AA408004, Cdc cell division cycle 5-like (S. pombe)                | NM_152810.2      |
| 23 | Gene Tcte1    | Tcte1, Tcte-1, It-complex-associated testis expressed 1            | NM_013688.2      |
| 23 | Gene Tmem15   | Tmem151b, Gt transmembrane protein 151B                            | NM_001013749.2   |
| 42 | Gene Nfkbie   | Nfkbie, IKBE nuclear factor of kappa light polypeptide gene enha   | NM_008690.3      |
| 42 | Gene Slc35b2  | Slc35b2, PAPS solute carrier family 35, member B2                  | NM_028662.2      |
| 42 | Gene Hsp90a   | 90kDa, Hsp90a heat shock protein 90 alpha (cytosolic), class B mem | NM_008302.3      |
| 29 | Gene Slc29a1  | 1200014D21Ri solute carrier family 29 (nucleoside transporters), m | NM_001199113.1,  |
| 29 | Gene Gm7325   | Gm7325, EG65 predicted gene 7325                                   | NM_001177468.1,  |
| 29 | Gene Tmem63   | BC026370, Tm transmembrane protein 63b                             | NM_198167.3      |
| 29 | Gene E030047  | E030047D23Ri RIKEN cDNA E030047D23 gene                            | XR_141315.1, XR_ |
| 29 | Gene Mrpl14   | Mrpl14, 11100 mitochondrial ribosomal protein L14                  | NM_026732.2      |
| 28 | Gene Vegfa    | Vegf188, Vegf: vascular endothelial growth factor A                | NM_001025250.3   |
| 23 | Gene Polh     | RAD30A, XPV, polymerase (DNA directed), eta (RAD 30 related)       | NM_030715.3      |
| 31 | Gene Xpo5     | mKIAA1291, 2-exportin 5                                            | NM_028198.2      |
| 31 | Gene Polr1c   | Polr1e, 40kDa, polymerase (RNA) I polypeptide C                    | NM_009085.2      |
| 31 | Gene Yipf3    | D17Wsu94e, Y Yip1 domain family, member 3                          | NM_145353.2      |
| 31 | Gene Lrrc73   | Lrrc73, Gm88 leucine rich repeat containing 73                     | NM_001111142.1   |
| 31 | Gene Tjap1    | Tjap1, AW121I tight junction associated protein 1                  | NM_001252473.1   |
| 19 | Gene Dlk2     | AI413481, Egfl delta-like 2 homolog (Drosophila)                   | NM_207666.2      |
| 19 | Gene Abcc10   | Abcc10, mFLJ0 ATP-binding cassette, sub-family C (CFTR/MRP), mer   | NM_145140.2, NM  |
| 38 | Gene Cul9     | mKIAA0708, C cullin 9                                              | NM_001081335.2   |
| 38 | Gene Srf      | AW240594, A serum response factor                                  | NM_020493.2      |
| 38 | Gene Ptk7     | chz, mPTK7/C PTK7 protein tyrosine kinase 7                        | NM_175168.4      |
| 32 | Gene Klc4     | AA408085, Kn: kinesin light chain 4                                | NM_029091.2      |
| 32 | Gene Mrpl2    | CGI-22, Mrpl2, mitochondrial ribosomal protein L2                  | NM_025302.3      |
| 32 | Gene Cul7     | Cul7, C230011 cullin 7                                             | NM_025611.5      |
| 29 | Gene Ppp2r5d  | Ppp2r5d, Tex2 protein phosphatase 2, regulatory subunit B (B56), c | NM_009358.3      |
| 29 | Gene Pex6     | AI132582, D13 peroxisomal biogenesis factor 6                      | NM_145488.1      |
| 32 | Gene Ptcra    | pT[a], pT-alpha: pre T cell antigen receptor alpha                 | NM_011195.2      |
| 32 | Gene 2310039  | 2310039H08Ri RIKEN cDNA 2310039H08 gene                            | NM_025966.3      |
| 32 | Gene Rpl7l1   | 1500016H10Ri ribosomal protein L7-like 1                           | NM_025433.3      |
| 30 | Gene A330017  | A330017A19Ri RIKEN cDNA A330017A19 gene                            | XR_107071.1, XR_ |
| 30 | Gene Tbcc     | 2810055C19Ri tubulin-specific chaperone C                          | NM_178385.3      |
| 23 | Gene Ubr2     | MGC36320, m ubiquitin protein ligase E3 component n-recognin 2     | NM_001177374.1   |

|    |      |          |                                                                   |                  |
|----|------|----------|-------------------------------------------------------------------|------------------|
| 17 | Gene | Trerf1   | Trerf1, MGC11 transcriptional regulating factor 1                 | NM_172622.2, NM  |
| 38 | Gene | Ccnd3    | 9230106B05Ri cyclin D3                                            | NM_001081635.1   |
| 38 | Gene | Bysl     | Enp1, Bysl, Bys bystin-like                                       | NM_016859.3      |
| 26 | Gene | Med20    | 1110011O05Ri mediator complex subunit 20                          | NM_020048.3      |
| 22 | Gene | Usp49    | Usp49, C33004 ubiquitin specific peptidase 49                     | NM_198421.1      |
| 22 | Gene | Tomm6    | Tomm6, A1663 translocase of outer mitochondrial membrane 6 hor    | NM_025365.3, NM  |
| 22 | Gene | Gm1487   | Gm14872, OTI predicted gene 14872                                 | NR_045945.1      |
| 22 | Gene | Prickle4 | Prickle4, Gm93 prickles homolog 4 (Drosophila)                    | XM_355019.5, XM  |
| 22 | Gene | Frs3     | Frs3, Frs2beta, fibroblast growth factor receptor substrate 3     | NM_144939.2      |
| 26 | Gene | Pgc      | 2210410L06Ri progastricsin (pepsinogen C)                         | NM_025973.3      |
| 26 | Gene | Tfeb     | Tfeb, Tcfef, TF transcription factor EB                           | NM_011549.3, NM  |
| 36 | Gene | Mdfi     | I-mfa, Mdfi, I-r MyoD family inhibitor                            | NM_010783.2, NM  |
| 29 | Gene | Foxp4    | 1200010K03Ri forkhead box P4                                      | NM_028767.2, NM  |
| 30 | Gene | Nfya     | Cbf-b, AA4078 nuclear transcription factor-Y alpha                | NM_010913.2, NM  |
| 30 | Gene | Oard1    | AW558560, O3 O-acyl-ADP-ribose deacylase 1                        | NM_207219.3      |
| 30 | Gene | Apobec2  | Arp1, Apobec2 apolipoprotein B mRNA editing enzyme, catalytic po  | NM_009694.3      |
| 18 | Gene | Rftn1    | 2310015N21Ri raftlin lipid raft linker 1                          | NM_181397.2      |
| 22 | Gene | Dazl     | Tpx2, Tpx-2, D: deleted in azoospermia-like                       | NM_010021.4      |
| 25 | Gene | Plcl2    | Plcl2, PLC-L2, F phospholipase C-like 2                           | NM_013880.3      |
| 25 | Gene | Tbc1d5   | mKIAA0210, KITBC1 domain family, member 5                         | NM_028162.3      |
| 29 | Gene | Rab5a    | Rab5a, A16639 RAB5A, member RAS oncogene family                   | NM_025887.4      |
| 24 | Gene | Kat2b    | AW536563, A5 K(lysine) acetyltransferase 2B                       | NM_001190846.1   |
| 26 | Gene | Stap2    | AW049765, ST signal transducing adaptor family member 2           | NM_145934.1      |
| 26 | Gene | Mpnd     | Mpnd, E13030 MPN domain containing                                | NM_026530.5      |
| 40 | Gene | Sh3gl1   | Sh3gl1, SH3P8, SH3-domain GRB2-like 1                             | NM_001252471.1   |
| 40 | Gene | Chaf1a   | Chaf1a, CAF-1, chromatin assembly factor 1, subunit A (p150)      | NM_013733.3      |
| 19 | Gene | Ubxn6    | Ubxn6, 221041: UBX domain protein 6                               | NM_024432.2      |
| 19 | Gene | Hdgfrp2  | HRP-2, Hdgrfp: hepatoma-derived growth factor, related protein 2  | NM_008233.2      |
| 21 | Gene | Plin5    | PAT-1, 231007 perilipin 5                                         | NM_001077348.1   |
| 21 | Gene | Lrg1     | MGC102387, 2 leucine-rich alpha-2-glycoprotein 1                  | NM_029796.2      |
| 21 | Gene | Sema6b   | MGC143995, \sema domain, transmembrane domain (TM), and cy        | NM_013662.2, NM  |
| 22 | Gene | Fem1a    | MGC117925, F feminization 1 homolog a (C. elegans)                | NM_010192.4      |
| 35 | Gene | Arrdc5   | Arrdc5, MGC1: arrestin domain containing 5                        | NM_029799.1      |
| 35 | Gene | Uhrf1    | ICBP90, RNF10 ubiquitin-like, containing PHD and RING finger doma | NM_010931.3, NM  |
| 26 | Gene | Ptprs    | Ptpt9, PTP, PTI protein tyrosine phosphatase, receptor type, S    | NM_011218.2, NM  |
| 17 | Gene | Gm9258   | EG668592, Gr predicted gene 9258                                  | XR_107079.1, XR_ |
| 39 | Gene | Safb2    | mKIAA0138, S: scaffold attachment factor B2                       | NM_001029979.2   |
| 56 | Gene | Safb     | 5330423C17Ri scaffold attachment factor B                         | NM_001163300.1   |
| 56 | Gene | 2410015  | QIL1, 2410015 RIKEN cDNA 2410015M20 gene                          | NM_153152.3      |
| 56 | Gene | Rpl36    | Rpl36 ribosomal protein L36                                       | NM_018730.3      |
| 56 | Gene | Lonp1    | 1200017E13Ri lon peptidase 1, mitochondrial                       | NM_028782.2      |
| 38 | Gene | Catsperc | Tmem146, Gm catsper channel auxiliary subunit delta               | NM_175350.3      |
| 20 | Gene | Ranbp3   | 2610024N24Ri RAN binding protein 3                                | NM_001252466.1,  |
| 20 | Gene | Vmac     | Vmac, A166225 vimentin-type intermediate filament associated coil | NM_178926.3, NM  |
| 20 | Gene | Ndufa11  | 2010012C24Ri NADH dehydrogenase (ubiquinone) 1 alpha subcom       | NM_027244.1      |
| 26 | Gene | Nrtn     | NTN, Nrtn neurturin                                               | NM_008738.2      |
| 26 | Gene | Dus3l    | Dus3l, AW557: dihydrouridine synthase 3-like (S. cerevisiae)      | NM_144858.2      |

|    |                   |                                                                   |                  |
|----|-------------------|-------------------------------------------------------------------|------------------|
| 19 | Gene Mllt1        | Mllt1, BAM11, myeloid/lymphoid or mixed-lineage leukemia (trithc  | NM_022328.2      |
| 25 | Gene Efna5        | LERK-7, Efna5, ephrin A5                                          | NM_010109.3, NM  |
| 22 | Gene Fbxl17       | AI452053, Fbx F-box and leucine-rich repeat protein 17            | NM_015794.1      |
| 33 | Gene A930002      | A930002H24R RIKEN cDNA A930002H24 gene                            | XR_107096.1, XR_ |
| 28 | Gene Pja2         | AI447901, MG praja 2, RING-H2 motif containing                    | NM_144859.2, NM  |
| 34 | Gene Man2a1       | Map-2, Mana- mannosidase 2, alpha 1                               | NM_008549.2      |
| 33 | Gene Vapa         | VAP33, Vapa, vesicle-associated membrane protein, associated pr   | NM_013933.3      |
| 30 | Gene Rab31        | AI415285, 170 RAB31, member RAS oncogene family                   | NM_133685.2      |
| 26 | Gene Ppp4r1       | Ppp4r1, 31100 protein phosphatase 4, regulatory subunit 1         | NM_146081.2, NM  |
| 25 | Gene Ralbp1       | Rip1, RLIP76, FralA binding protein 1                             | NM_009067.5, NM  |
| 19 | Gene Twsg1        | Tsg, D17Ert4(twisted gastrulation homolog 1 (Drosophila)          | NM_023053.3      |
| 27 | Gene Ankrd12      | ANCO-2, 2900(ankyrin repeat domain 12                             | NM_001025572.1   |
| 27 | Gene 5430411      | 5430411C19Ri RIKEN cDNA 5430411C19 gene                           | XR_168569.1, XR_ |
| 28 | Gene Ndufv2       | 2900010C23Ri NADH dehydrogenase (ubiquinone) flavoprotein 2       | NM_028388.2      |
| 28 | Gene Wash         | Wash1, ORF19 WAS protein family homolog                           | NM_026833.1, NM  |
| 35 | Gene Soga2        | Kiaa0802, MG(SOGA family member 2                                 | NM_172963.4, NM  |
| 21 | Gene Rab12        | C77700, Rab12 RAB12, member RAS oncogene family                   | NM_024448.2      |
| 24 | Gene Ptpm         | MGC90724, m protein tyrosine phosphatase, receptor type, M        | NM_008984.2      |
| 34 | Gene Lama1        | AA408497, Lar laminin, alpha 1                                    | NM_008480.2      |
| 17 | Gene Tmem20       | EG622645, Gr transmembrane protein 200C                           | NM_001206661.1   |
| 23 | Gene Epb4.1l3     | NBL3, Epb4l3 erythrocyte protein band 4.1-like 3                  | NM_013813.1      |
| 25 | Gene C030034      | C030034I22Ri RIKEN cDNA C030034I22 gene                           | NR_026848.1      |
| 27 | Gene Tgif1        | Tgif, AI462167 TGFB-induced factor homeobox 1                     | NM_009372.3, NM  |
| 27 | Gene Mir1195      | mmu-mir-1195 microRNA 1195                                        | NR_035427.1      |
| 30 | Gene Myl12b       | C77744, RLC-B myosin, light chain 12B, regulatory                 | NM_023402.2      |
| 30 | Gene Myl12a       | Myl12a, C802C myosin, light chain 12A, regulatory, non-sarcomeric | NM_026064.2      |
| 29 | Gene Smchd1       | MommeD1, Sr SMC hinge domain containing 1                         | NM_028887.3      |
| 23 | Gene Ndc80        | HEC, 2610020(NDC80 homolog, kinetochore complex component (       | NM_023294.2      |
| 16 | Gene Spdya        | MLZ-465, 493C speedy homolog A (Xenopus laevis)                   | NM_029254.1, NM  |
| 16 | Gene Trmt61b      | Trmt61b, 6234tRNA methyltransferase 61B                           | NR_015549.1, NR_ |
| 44 | Gene Wdr43        | Wrd43, Wdr43WD repeat domain 43                                   | NM_175639.1      |
| 18 | Gene Alk          | Tcrz, Alk, CD24anaplastic lymphoma kinase                         | NM_007439.2      |
| 29 | Gene Ypel5        | CGI-127, 2310(yippee-like 5 (Drosophila)                          | NM_027166.5      |
| 26 | Gene Lbh          | 6720416L16Ril limb-bud and heart                                  | NM_029999.4      |
| 28 | Gene Lclat1       | Agpat8, AI181(lysocardiolipin acyltransferase 1                   | NM_001081071.2   |
| 22 | Gene Memo1        | 0610016J10Ril mediator of cell motility 1                         | NM_133771.2      |
| 24 | Gene Dpy30        | 2810410M20R dpy-30 homolog (C. elegans)                           | NM_024428.4, NM  |
| 25 | Gene Spast        | Spg4, Spast, m spastin                                            | NM_001162870.1,  |
| 26 | Gene Yipf4        | Yipf4, 2310034Yip1 domain family, member 4                        | NM_026417.4      |
| 34 | Gene Birc6        | A430032G04R baculoviral IAP repeat-containing 6                   | NM_007566.2      |
| 25 | Gene Ltbp1        | 9830146M04, latent transforming growth factor beta binding prot   | NM_019919.3, NM  |
| 35 | Gene Crim1        | Crim1, AU015(cysteine rich transmembrane BMP regulator 1 (chor    | NM_015800.3      |
| 30 | Gene Strn         | AU022939, D1 striatin, calmodulin binding protein                 | NM_011500.2      |
| 32 | Gene Cdc42ep      | Cdc42ep3, Ce CDC42 effector protein (Rho GTPase binding) 3        | NM_026514.2      |
| 25 | Gene LOC101055649 | uncharacterized LOC101055649                                      | XR_168564.1, XR_ |
| 25 | Gene Rmdn2        | MGC37733, Fa regulator of microtubule dynamics 2                  | NM_201361.2      |
| 34 | Gene Cyp1b1       | Cyp1b1, CP1B, cytochrome P450, family 1, subfamily b, polypeptide | NM_009994.1      |

|    |      |              |                                                                   |                  |
|----|------|--------------|-------------------------------------------------------------------|------------------|
| 30 | Gene | Atl2         | Atl2, Aip-2, Arl atlastin GTPase 2                                | NM_019717.2, NM  |
| 44 | Gene | Hnrpll       | AI852082, 281 heterogeneous nuclear ribonucleoprotein L-like      | NM_144802.3      |
| 43 | Gene | Srsf7        | 9G8, Srsf7, MC serine/arginine-rich splicing factor 7             | NM_001195485.1   |
| 43 | Gene | Ttc39d       | Ttc39d, 49305 tetratricopeptide repeat domain 39D                 | NM_026351.2      |
| 21 | Gene | Arhgef33     | Arhgef33, Gm5 Rho guanine nucleotide exchange factor (GEF) 33     | NM_001145452.1   |
| 21 | Gene | Gm1019       | Gm10190, ENS predicted gene 10190                                 | NR_028385.1      |
| 24 | Gene | Sos1         | AI449023, 443 son of sevenless homolog 1 (Drosophila)             | NM_009231.2      |
| 30 | Gene | Map4k3       | RAB8IPL1, 953 mitogen-activated protein kinase kinase kinase kina | NM_001081357.1   |
| 25 | Gene | Thumpd       | 2810025A12Ri THUMP domain containing 2                            | NM_028138.1      |
| 31 | Gene | Pkdcc        | Adtk1, X83346 protein kinase domain containing, cytoplasmic       | NM_134117.2      |
| 24 | Gene | Kcng3        | Kv10.1b, KV6.3 potassium voltage-gated channel, subfamily G, mem  | NM_153512.1      |
| 74 | Gene | Zfp36l2      | Tis11d, ERF2, E zinc finger protein 36, C3H type-like 2           | NM_001001806.2   |
| 74 | Gene | Thada        | 6530405K19, E thyroid adenoma associated                          | NM_183021.3      |
| 30 | Gene | Lrp3         | GP130, C7664 leucine-rich PPR-motif containing                    | NM_028233.2      |
| 27 | Gene | Prepl        | mKIAA0436, 2i prolyl endopeptidase-like                           | NM_001163622.1   |
| 27 | Gene | Camkmt       | 1700106N22Ri calmodulin-lysine N-methyltransferase                | NM_028576.2      |
| 22 | Gene | Six3os1      | Six3os1, D17M Six3 opposite strand transcript 1                   | NR_038082.1, NR_ |
| 22 | Gene | Six3         | Six3, Six3a, Six sine oculis-related homeobox 3                   | NM_011381.4      |
| 17 | Gene | Six2         | Six2 sine oculis-related homeobox 2                               | NM_011380.2      |
| 23 | Gene | Srbd1        | AI461933, MG S1 RNA binding domain 1                              | NM_030133.3      |
| 27 | Gene | Gm5817       | Gm5817 predicted gene 5817                                        | XR_168764.1, XR_ |
| 27 | Gene | Prkce        | R75156, Pkce, protein kinase C, epsilon                           | NM_011104.3      |
| 19 | Gene | Epas1        | HRF, HIF-2alpha endothelial PAS domain protein 1                  | NM_010137.3      |
| 22 | Gene | Socs5        | Socs5, mKIAAC suppressor of cytokine signaling 5                  | NM_019654.2      |
| 24 | Gene | Mcf2         | Mcf2, Sdnf, I multiple coagulation factor deficiency 2            | NM_139295.3, NM  |
| 37 | Gene | 4833418      | 4833418N02Ri RIKEN cDNA 4833418N02 gene                           | NR_015506.2      |
| 37 | Gene | Ttc7         | 1110035E02Ri tetratricopeptide repeat domain 7                    | NM_028639.3      |
| 20 | Gene | Calm2        | Calm3, AL024C calmodulin 2                                        | NM_007589.5      |
| 19 | Gene | Kcnk12       | Kcnk12, mntk1 potassium channel, subfamily K, member 12           | NM_199251.1      |
| 39 | Gene | LOC101055631 | uncharacterized LOC101055631                                      | XM_003946009.1,  |
| 39 | Gene | Msh6         | AW550279, Al mutS homolog 6 (E. coli)                             | NM_010830.2      |
| 27 | Gene | Fbxo11       | Fbxo11, C8004 F-box protein 11                                    | NM_001081034.1   |
| 33 | Gene | Foxn2        | Fkh19, Foxn1, forkhead box N2                                     | NM_180974.4      |
| 27 | Gene | Nrxn1        | mKIAA0578, 1 neurexin I                                           | NM_020252.3, NM  |
| 25 | Gene | Crem         | ICERI, Crem, ICcAMP responsive element modulator                  | NM_013498.2, NM  |
| 25 | Gene | Gm6225       | Gm6225, EG62 predicted gene 6225                                  | NR_033457.1      |
| 25 | Gene | Cul2         | Cul2, mKIAA41 cullin 2                                            | NM_029402.3      |
| 28 | Gene | Bambi        | Bambi, 26100C BMP and activin membrane-bound inhibitor            | NM_026505.2      |
| 16 | Gene | 4833419      | 4833419F23Ri RIKEN cDNA 4833419F23 gene                           | NR_040328.1      |
| 16 | Gene | Mtpap        | Mtpap, Papd1, mitochondrial poly(A) polymerase                    | NM_026157.2      |
| 27 | Gene | 9430020      | 9430020K01Ri RIKEN cDNA 9430020K01 gene                           | NM_001081963.1   |
| 24 | Gene | Zfp438       | Zfp438, 94300 zinc finger protein 438                             | NM_178722.5      |
| 23 | Gene | Gm1012       | Zeb1os, Gm10 predicted gene 10125                                 | NR_033552.1      |
| 23 | Gene | Zeb1         | Zfhep, [delta]E zinc finger E-box binding homeobox 1              | NM_011546.3      |
| 25 | Gene | Arhgap1      | Arhgap12, 281 Rho GTPase activating protein 12                    | NM_029277.2, NM  |
| 30 | Gene | Kif5b        | Khcs, AL02280 kinesin family member 5B                            | NM_008448.3      |
| 31 | Gene | Epc1         | A930032N02R enhancer of polycomb homolog 1 (Drosophila)           | NM_007935.1, NM  |

|    |               |                                                                      |                  |
|----|---------------|----------------------------------------------------------------------|------------------|
| 31 | Gene Mir1893  | Mirn1893, Mir microRNA 1893                                          | NR_035446.1      |
| 19 | Gene Mxk      | Irxl1, Mxk, 943 mohawk homeobox                                      | NM_177595.4      |
| 28 | Gene Wac      | 1110067P07Ri WW domain containing adaptor with coiled-coil           | NM_153085.3, NM  |
| 27 | Gene Fzd8     | Fz8, Fzd8 frizzled homolog 8 (Drosophila)                            | NM_008058.2      |
| 41 | Gene Ccny     | 4631402G10Ri cyclin Y                                                | NM_026484.3      |
| 24 | Gene Thoc1    | NMP-84, Thoc THO complex 1                                           | NM_153552.3      |
| 34 | Gene Rock1    | 1110055K06Ri Rho-associated coiled-coil containing protein kinase    | NM_009071.2      |
| 23 | Gene Greb1l   | Greb1l, KIAA46 growth regulation by estrogen in breast cancer-like   | NM_001083628.1   |
| 37 | Gene Esco1    | A930014I12Ri establishment of cohesion 1 homolog 1 (S. cerevisiae)   | NM_001081222.1   |
| 37 | Gene Snrpd1   | AA407109, AL small nuclear ribonucleoprotein D1                      | NM_009226.4      |
| 24 | Gene Abhd3    | LABH3, Abhd3 abhydrolase domain containing 3                         | NM_134130.1      |
| 24 | Gene 4930563  | 4930563E18Ri RIKEN cDNA 4930563E18 gene                              | NR_045379.1      |
| 55 | Gene 1010001  | 1010001N08Ri RIKEN cDNA 1010001N08 gene                              | XR_168572.1, XR_ |
| 55 | Gene Gata6    | AA410133, GA GATA binding protein 6                                  | NM_010258.3      |
| 23 | Gene Rbbp8    | 9930104E21Ri retinoblastoma binding protein 8                        | NM_001081223.2   |
| 32 | Gene Gm6277   | Gm6277 predicted gene 6277                                           | NR_045421.1      |
| 32 | Gene Cables1  | Cables1, Cable CDK5 and Abl enzyme substrate 1                       | NM_022021.2, NM  |
| 32 | Gene Mir1901  | Mir1901, Mirn microRNA 1901                                          | NR_035447.1      |
| 26 | Gene Npc1     | nmf164, C853 Niemann Pick type C1                                    | NM_008720.2      |
| 25 | Gene Ttc39c   | Ttc39c, 28104 tetratricopeptide repeat domain 39C                    | NM_028341.4      |
| 23 | Gene Osbpl1a  | Osbpl1a, Osbp oxysterol binding protein-like 1A                      | NM_001252489.1   |
| 30 | Gene Ss18     | Syt, D130059H synovial sarcoma translocation, Chromosome 18          | NM_009280.2, NM  |
| 33 | Gene Taf4b    | 4932409F03Ri TAF4B RNA polymerase II, TATA box binding protein       | NM_001100449.1   |
| 22 | Gene Kctd1    | Kctd1, AI66154 potassium channel tetramerisation domain containi     | NM_001142731.1   |
| 17 | Gene Cdh2     | N-cadherin, CC cadherin 2                                            | NM_007664.4      |
| 17 | Gene Gm1532   | OTTMUSG000 predicted gene 15328                                      | NR_045399.1      |
| 22 | Gene Trappc8  | D030074E01Ri trafficking protein particle complex 8                  | NM_029491.2, NM  |
| 35 | Gene Rnf138   | STRIN, Trif-d, 2 ring finger protein 138                             | NM_019706.2, NM  |
| 23 | Gene Garem    | mKIAA4238, C GRB2 associated, regulator of MAPK1                     | NM_001033445.2   |
| 17 | Gene Asxl3    | Gm329, D430C additional sex combs like 3 (Drosophila)                | NM_001167777.1   |
| 35 | Gene Zfp397   | 2810411K16Ri zinc finger protein 397                                 | NM_027007.2      |
| 20 | Gene Zfp191   | AI480505, Znp zinc finger protein 191                                | NM_021559.2      |
| 26 | Gene Galnt1   | Galnt1 UDP-N-acetyl-alpha-D-galactosamine:polypeptide N              | NM_013814.3, NM  |
| 17 | Gene 2700062  | MGC103375, 2 RIKEN cDNA 2700062C07 gene                              | NM_026529.4      |
| 31 | Gene Rprd1a   | mKIAA4077, C regulation of nuclear pre-mRNA domain containing        | NM_144861.2      |
| 30 | Gene Slc39a6  | Slc39a6, Ermel solute carrier family 39 (metal ion transporter), men | NM_139143.3      |
| 30 | Gene Elp2     | AU023723, Sta elongator acetyltransferase complex subunit 2          | NM_021448.2      |
| 21 | Gene Mocos    | Mocos, MOS, M molybdenum cofactor sulfurase                          | NM_026779.1      |
| 21 | Gene Fhod3    | mKIAA1695, FI formin homology 2 domain containing 3                  | NM_175276.3      |
| 34 | Gene Slc25a46 | 1200007B05Ri solute carrier family 25, member 46                     | NM_026165.3      |
| 25 | Gene Polr2d   | Polr2d, 23100 polymerase (RNA) II (DNA directed) polypeptide D       | NM_027101.2, NM  |
| 25 | Gene Wdr33    | 2810021O11Ri WD repeat domain 33                                     | NM_001170966.1   |
| 36 | Gene Iws1     | 1700069O15Ri IWS1 homolog (S. cerevisiae)                            | NM_173441.3      |
| 45 | Gene Map3k2   | Mekk2, 96300 mitogen-activated protein kinase kinase kinase 2        | NM_011946.3      |
| 34 | Gene A830052  | A830052D11Ri RIKEN cDNA A830052D11 gene                              | NR_045403.1      |
| 34 | Gene Bin1     | ALP-1, BRAMP bridging integrator 1                                   | NM_009668.2, NM  |
| 34 | Gene 4930455  | 4930455D15Ri RIKEN cDNA 4930455D15 gene                              | NR_045381.1      |



|    |               |                                                                   |                  |
|----|---------------|-------------------------------------------------------------------|------------------|
| 34 | Gene Wdr36    | MGC38421, 57WD repeat domain 36                                   | NM_144863.4, NM  |
| 26 | Gene Nrep     | D0H4S114, Nrp neuronal regeneration related protein               | NM_053078.4, NM  |
| 26 | Gene Gm1054   | ENSMUSG000I (predicted gene 10549)                                | NR_045415.1      |
| 23 | Gene 2410004  | 2410004N09RI RIKEN cDNA 2410004N09 gene                           | NR_038151.1, NR_ |
| 24 | Gene Epb4.1l4 | NBL4, Epb4l14 erythrocyte protein band 4.1-like 4a                | NM_013512.2      |
| 30 | Gene Gm1054   | ENSMUSG000I (ribosomal protein L29 pseudogene)                    | NR_040534.1      |
| 32 | Gene Apc      | AW124434, m.adenomatosis polyposis coli                           | NM_007462.3      |
| 32 | Gene Srp19    | Srp19, 231002 signal recognition particle 19                      | NM_025527.3      |
| 36 | Gene Reep5    | AU022809, DP receptor accessory protein 5                         | NM_007874.3      |
| 24 | Gene Fam13b   | MGC37079, A family with sequence similarity 13, member B          | NM_146084.1      |
| 26 | Gene Brd8     | 2610007E11Ri bromodomain containing 8                             | NM_030147.2      |
| 26 | Gene Kif20a   | Kif20a, Rab6kii kinesin family member 20A                         | NM_001166406.1,  |
| 26 | Gene Cdc23    | 6030435O18, (CDC23 cell division cycle 23                         | NM_178347.4      |
| 31 | Gene Cdc25c   | Cdc25c, Cdc25                                                     | NM_009860.2      |
| 31 | Gene 201011C  | 2010110K18RI RIKEN cDNA 2010110K18 gene                           | XR_168576.1, XR_ |
| 31 | Gene Fam53c   | Fam53c, 2810 family with sequence similarity 53, member C         | NM_175104.4      |
| 19 | Gene Kdm3b    | JHDM2B, 5830 KDM3B lysine (K)-specific demethylase 3B             | NM_001081256.1   |
| 33 | Gene Egr1     | Krox-1, Zif268, early growth response 1                           | NM_007913.5      |
| 32 | Gene Etf1     | ERF1, A146337 eukaryotic translation termination factor 1         | NM_144866.3      |
| 32 | Gene Hspa9    | Hsp74a, Mort heat shock protein 9                                 | NM_010481.2      |
| 36 | Gene Snhg4    | Snhg4, Gm174 small nucleolar RNA host gene 4 (non-protein coding) | NR_038073.1      |
| 36 | Gene Mir1949  | mmu-mir-1949 microRNA 1949                                        | NR_035472.1      |
| 36 | Gene Snora74  | EG436583, U1 small nucleolar RNA, H/ACA box 74A                   | NR_002905.3      |
| 36 | Gene Matr3    | D030046F20Ri matrin 3                                             | NM_010771.6      |
| 35 | Gene Paip2    | Paip2, AU0459 polyadenylate-binding protein-interacting protein 2 | NM_026420.2      |
| 27 | Gene Cxxc5    | Cxxc5, 493041 CXXC finger 5                                       | NM_133687.2      |
| 23 | Gene Nrg2     | NTAK, Nrg2, D neuregulin 2                                        | NM_001167891.1   |
| 33 | Gene Pura     | Pura, CAGER-1 purine rich element binding protein A               | NM_008989.3      |
| 24 | Gene Pcdhga1  | Pcdhga1 protocadherin gamma subfamily A, 1                        | NM_033584.1      |
| 24 | Gene Pcdhga2  | mKIAA0588, Pcdhga2 protocadherin gamma subfamily A, 2             | NM_033585.1      |
| 24 | Gene Pcdhga3  | Pcdhga3 protocadherin gamma subfamily A, 3                        | NM_033586.2      |
| 24 | Gene Pcdhgb1  | Pcdhgb1, MGC protocadherin gamma subfamily B, 1                   | NM_033574.3      |
| 24 | Gene Pcdhga4  | Pcdhga4 protocadherin gamma subfamily A, 4                        | NM_033587.3      |
| 24 | Gene Pcdhgb2  | Pcdhgb2 protocadherin gamma subfamily B, 2                        | NM_033575.3      |
| 24 | Gene Pcdhga5  | Pcdhga5 protocadherin gamma subfamily A, 5                        | NM_033588.4      |
| 24 | Gene Pcdhga6  | Pcdhga6 protocadherin gamma subfamily A, 6                        | NM_033589.1      |
| 24 | Gene Pcdhga7  | Pcdhga7 protocadherin gamma subfamily A, 7                        | NM_033590.3      |
| 24 | Gene Pcdhgb4  | Pcdhgb4 protocadherin gamma subfamily B, 4                        | NM_033576.1      |
| 24 | Gene Pcdhga8  | KIAA4054, Pcdhga8 protocadherin gamma subfamily A, 8              | NM_033591.3      |
| 24 | Gene Pcdhgb5  | Pcdhgb5 protocadherin gamma subfamily B, 5                        | NM_033577.1      |
| 24 | Gene Pcdhga9  | Pcdhga9 protocadherin gamma subfamily A, 9                        | NM_033592.3      |
| 24 | Gene Pcdhgb6  | Pcdhgb6 protocadherin gamma subfamily B, 6                        | NM_033578.3      |
| 24 | Gene Pcdhga10 | Pcdhga10 protocadherin gamma subfamily A, 10                      | NM_033593.3      |
| 24 | Gene Pcdhgb7  | Pcdhgb7 protocadherin gamma subfamily B, 7                        | NM_033579.1      |
| 24 | Gene Pcdhga11 | Pcdhga11 protocadherin gamma subfamily A, 11                      | NM_033594.2      |
| 24 | Gene Pcdhgb8  | Pcdhgb8 protocadherin gamma subfamily B, 8                        | NM_033580.2      |
| 24 | Gene Pcdhga12 | Pcdhga12, Pcdhga12 protocadherin gamma subfamily A, 12            | NM_033595.4      |

|    |                   |                                                                     |                  |
|----|-------------------|---------------------------------------------------------------------|------------------|
| 24 | Gene Pcdhgc3      | Pcdhgc3, MGC protocadherin gamma subfamily C, 3                     | NM_033581.3      |
| 24 | Gene Pcdhgc4      | Pcdhgc4, MGC protocadherin gamma subfamily C, 4                     | NM_033582.2      |
| 26 | Gene Diap1        | Drf1, KIAA406: diaphanous homolog 1 (Drosophila)                    | NM_007858.2      |
| 26 | Gene Hdac3        | AW537363, Hc histone deacetylase 3                                  | NM_010411.2      |
| 17 | Gene Rel2         | MGC47374, e; RELT-like 2                                            | NM_153793.2      |
| 17 | Gene Fchsd1       | A030002D08Ri FCH and double SH3 domains 1                           | NM_175684.4      |
| 35 | Gene Rnf14        | D7Bwg0165e, ring finger protein 14                                  | NM_020012.2, NM  |
| 32 | Gene Gnpda1       | Gnpi, GNPDA, glucosamine-6-phosphate deaminase 1                    | NM_011937.2      |
| 38 | Gene Ndfip1       | Ndfip1, 06100: Nedd4 family interacting protein 1                   | NM_022996.1      |
| 31 | Gene Spry4        | sprouty4, A03(sprouty homolog 4 (Drosophila)                        | NM_011898.2      |
| 31 | Gene 9630014      | 9630014M24R RIKEN cDNA 9630014M24 gene                              | XR_035375.1, XR_ |
| 26 | Gene Arhgap2      | Arhgap26, 181 Rho GTPase activating protein 26                      | NM_175164.4      |
| 20 | Gene Nr3c1        | Grl1, Grl-1, Nr: nuclear receptor subfamily 3, group C, member 1    | NM_008173.3      |
| 26 | Gene Tcerg1       | CA150b, ca15C transcription elongation regulator 1 (CA150)          | NM_001039474.1   |
| 19 | Gene Dpysl3       | CRMP-4, Ulip1 dihydropyrimidinase-like 3                            | NM_009468.4, NM  |
| 20 | Gene LOC100862305 | uncharacterized LOC100862305                                        | XM_003688953.2   |
| 20 | Gene Gm3650       | Gm3650, predicted gene 3650                                         | XM_001477500.2   |
| 23 | Gene Ythdc2       | 3010002F02Ri YTH domain containing 2                                | NM_001163013.1   |
| 29 | Gene Kcnn2        | SK2, fri, SKCA2 potassium intermediate/small conductance calcium    | NM_080465.2      |
| 23 | Gene Fem1c        | 2610312A07Ri fem-1 homolog c (C.elegans)                            | NM_173423.4      |
| 22 | Gene Tmed7        | AU044611, Tm transmembrane emp24 protein transport domain c         | NM_025698.1      |
| 22 | Gene Eif1a        | C76390, Eif4c, eukaryotic translation initiation factor 1A          | NM_010120.5      |
| 25 | Gene Atg12        | 4931423H11Ri autophagy related 12                                   | NM_026217.3      |
| 25 | Gene Ap3s1        | MGC117528, [ adaptor-related protein complex 3, sigma 1 subunit     | NM_009681.4      |
| 17 | Gene 4833403      | Lvrn, 4833403I RIKEN cDNA 4833403I15 gene                           | NM_029008.1      |
| 13 | Gene Sema6a       | Sema6a, Sema sema domain, transmembrane domain (TM), and cy         | NM_018744.2      |
| 27 | Gene Dmxl1        | C630007L23Ri Dmx-like 1                                             | NM_001081371.2   |
| 22 | Gene Lox          | Lox, AI893619, lysyl oxidase                                        | NM_010728.2      |
| 22 | Gene Sncaip       | 2810407O15Ri synuclein, alpha interacting protein (synphilin)       | NM_026408.4, NM  |
| 24 | Gene Snx2         | Snx2, 0610030 sorting nexin 2                                       | NM_026386.1      |
| 22 | Gene Prdm6        | PRISM, Prdm6, PR domain containing 6                                | NM_001033281.3   |
| 17 | Gene Csnk1g3      | Csnk1g3, C330 casein kinase 1, gamma 3                              | NM_152809.2      |
| 48 | Gene Lmnb1        | Lmnb1                                                               | NM_010721.2      |
| 24 | Gene March3       | 6330411115Ri membrane-associated ring finger (C3HC4) 3              | NM_177115.2      |
| 39 | Gene Slc12a2      | Slc12a2, mBSC solute carrier family 12, member 2                    | NM_009194.3      |
| 24 | Gene Fbn2         | KIAA4226, sy, I fibrillin 2                                         | NM_010181.2      |
| 15 | Gene Adamts1      | Adamts19, D2: a disintegrin-like and metallopeptidase (reprolysin t | NM_175506.3      |
| 25 | Gene Chsy3        | Chsy3, AI6622: chondroitin sulfate synthase 3                       | NM_001081328.1   |
| 29 | Gene Dctn4        | C130039E17Ri dynactin 4                                             | NM_026302.3      |
| 29 | Gene Rbm22        | 8430430L24Ri RNA binding motif protein 22                           | NM_025776.2      |
| 20 | Gene Myoz3        | MGC123457, F myozenin 3                                             | NM_133363.3, XM  |
| 23 | Gene Synpo        | Synpo, 903021 synaptopodin                                          | NM_177340.2, NM  |
| 23 | Gene LOC101055835 | synaptopodin-like                                                   | XM_003945584.1,  |
| 49 | Gene Rps14        | 2600014J02Ri ribosomal protein S14                                  | NM_020600.4      |
| 21 | Gene Tcof1        | Tcof1, AA4088 Treacher Collins Franceschetti syndrome 1, homolog    | NM_011552.3, NM  |
| 21 | Gene Cdx1         | Cdx, Cdx-1, Cd: caudal type homeobox 1                              | NM_009880.3      |
| 21 | Gene Pdgfrb       | Pdgfr, Pdgfrb, platelet derived growth factor receptor, beta polype | NM_001146268.1   |

|    |              |                                                                    |                  |
|----|--------------|--------------------------------------------------------------------|------------------|
| 32 | Gene Hmgxb3  | AI413166, mKI HMG box domain containing 3                          | NM_178277.1, NM  |
| 23 | Gene Ppargc1 | Perc, 4631412 peroxisome proliferative activated receptor, gamma   | NM_133249.2      |
| 23 | Gene Mir378  | mmu-mir-378, microRNA 378                                          | NR_029879.1      |
| 42 | Gene Csnk1a1 | MGC30571, M casein kinase 1, alpha 1                               | NM_146087.2      |
| 22 | Gene Htr4    | 5-HT<sub>4</sub> 5 hydroxytryptamine (serotonin) receptor 4        | NM_008313.4      |
| 27 | Gene Napg    | Napg, SNARE, N-ethylmaleimide sensitive fusion protein attachme    | NM_028017.1      |
| 20 | Gene Piezo2  | Fam38b, Fam38b2, FLJ23403, 9430028L06Rik, MGC182702, 59304:        | NM_001039485.4   |
| 28 | Gene Txnl1   | TRP32, 32kDa, thioredoxin-like 1                                   | NM_016792.4      |
| 22 | Gene Atp8b1  | AI451886, Atp:ATPase, class I, type 8B, member 1                   | NM_001001488.3   |
| 23 | Gene Nedd4l  | Nedd4l, Nedd4 neural precursor cell expressed, developmentally dc  | NM_031881.2, NM  |
| 23 | Gene AA6672  | AA667203 expressed sequence AA667203                               | XR_141351.2      |
| 21 | Gene Sec11c  | Sec11c, 18100 SEC11 homolog C (S. cerevisiae)                      | NM_025468.2      |
| 18 | Gene Rax     | Rax, ey1, E130 retina and anterior neural fold homeobox            | NM_013833.2      |
| 18 | Gene Raxos1  | Raxos1, 75304 Rax overlapping opposite strand transcript 1         | XR_107142.1, XR_ |
| 20 | Gene Lman1   | MCFD1, P58, L lectin, mannose-binding, 1                           | NM_001172062.1   |
| 26 | Gene Ccbe1   | MGC118667, K collagen and calcium binding EGF domains 1            | NM_178793.4      |
| 26 | Gene Gm1595  | Gm15958, OTI predicted gene 15958                                  | XR_107143.1, XR_ |
| 20 | Gene Gnal    | 9630020G10Ri guanine nucleotide binding protein, alpha stimulatir  | NM_010307.2, NM  |
| 18 | Gene Chmp1b  | 2810405111Rik charged multivesicular body protein 1B               | NM_024190.2      |
| 22 | Gene Mppe1   | A530095G11, I metallophosphoesterase 1                             | NM_172630.2      |
| 26 | Gene Impa2   | AW259601, AI inositol (myo)-1(or 4)-monophosphatase 2              | NM_053261.2      |
| 34 | Gene Tubb6   | BB220206, 231 tubulin, beta 6 class V                              | NM_026473.2      |
| 38 | Gene Afg3l2  | 2310036I02Rik AFG3(ATPase family gene 3)-like 2 (yeast)            | NM_027130.1      |
| 19 | Gene Slmo1   | Slmo1, A23007 slowmo homolog 1 (Drosophila)                        | NM_144867.2      |
| 33 | Gene Cep76   | 9630013E05, C centrosomal protein 76                               | NM_001081073.1   |
| 33 | Gene Psmg2   | Psmg2, 17000: proteasome (prosome, macropain) assembly chaper      | NM_134138.1      |
| 38 | Gene Ptpn2   | TC-PTP, Ptpn2, protein tyrosine phosphatase, non-receptor type 2   | NM_001127177.1   |
| 32 | Gene Seh1l   | Seh1, SEH1A, 2 SEH1-like (S. cerevisiae)                           | NM_028112.2, NM  |
| 32 | Gene 4930549 | 4930549G23Ri RIKEN cDNA 4930549G23 gene                            | NR_045376.1      |
| 27 | Gene Ldlrad4 | D330030L18Ri low density lipoprotein receptor class A domain con   | NM_172631.3      |
| 22 | Gene 4930503 | 4930503L19Ri RIKEN cDNA 4930503L19 gene                            | NM_172967.2      |
| 22 | Gene Stard6  | 4833424I06Rik StAR-related lipid transfer (START) domain containir | NM_029019.3      |
| 30 | Gene Mex3c   | A130001D14Ri mex3 homolog C (C. elegans)                           | NM_001039214.4   |
| 18 | Gene Elac1   | 2610018O07Ri elac homolog 1 (E. coli)                              | NM_053255.3      |
| 27 | Gene Me2     | Me2, AW1205 malic enzyme 2, NAD(+)-dependent, mitochondrial        | NM_145494.2      |
| 16 | Gene Mapk4   | Prkm4, Mapk4 mitogen-activated protein kinase 4                    | NM_172632.2      |
| 22 | Gene Ska1    | 2810433K01Ri spindle and kinetochore associated complex subunit    | NM_025581.4, NM  |
| 22 | Gene Cxxc1   | Cfp1, 2410002 CXXC finger 1 (PHD domain)                           | NM_028868.3      |
| 21 | Gene Myo5b   | mKIAA1119, A myosin VB                                             | NM_201600.2      |
| 46 | Gene Rpl17   | MGC103289, Fribosomal protein L17                                  | NM_001002239.3   |
| 46 | Gene Snord58 | Snord58b, MB small nucleolar RNA, C/D box 58B                      | NR_028552.1      |
| 46 | Gene BC03118 | BC031181 cDNA sequence BC031181                                    | NM_001001181.3   |
| 40 | Gene Dym     | C030019K18Ri dymeclin                                              | NM_027727.2      |
| 41 | Gene Smad7   | Smad7, Madh7                                                       | NM_001042660.1   |
| 29 | Gene Ctif    | Ctif, Gm672, N CBP80/20-dependent translation initiation factor    | NM_201354.2      |
| 26 | Gene Zbtb7c  | B230208J24Ril zinc finger and BTB domain containing 7C             | NM_145356.3      |
| 29 | Gene Ier3ip1 | Ier3ip1, AL022 immediate early response 3 interacting protein 1    | NM_025409.3      |

|    |              |                                                                               |                  |
|----|--------------|-------------------------------------------------------------------------------|------------------|
| 19 | Gene St8sia5 | Siat8e, MGC41ST8 alpha-N-acetyl-neuraminide alpha-2,8-sialyltran              | NM_013666.2, NM  |
| 25 | Gene 8030462 | 8030462N17Ri RIKEN cDNA 8030462N17 gene                                       | NM_178670.3      |
| 25 | Gene 4930465 | 4930465K10Ri RIKEN cDNA 4930465K10 gene                                       | NR_027978.1      |
| 33 | Gene Haus1   | MGC36238, BC HAUS augmin-like complex, subunit 1                              | NM_146089.2      |
| 33 | Gene Atp5a1  | AL022851, Atp ATP synthase, H+ transporting, mitochondrial F1 cor             | NM_007505.2      |
| 16 | Gene F830208 | F830208F22Ril RIKEN cDNA F830208F22 gene                                      | XR_107122.1, XR_ |
| 16 | Gene Pstpip2 | MAYP, cmo, P <sub>s</sub> proline-serine-threonine phosphatase-interacting pr | NM_013831.4      |
| 21 | Gene Setbp1  | MGC90748, Se SET binding protein 1                                            | NM_053099.2      |
| 22 | Gene Pard6g  | 2410049N21Ri par-6 partitioning defective 6 homolog gamma (C. e               | NM_053117.3      |
| 25 | Gene Hsbp1l1 | 1810005K13Ri heat shock factor binding protein 1-like 1                       | NM_001136181.1   |
| 25 | Gene Pqlc1   | 2310009N05Ri PQ loop repeat containing 1                                      | NM_001164420.1   |
| 23 | Gene Nfatc1  | NFAT2, AI4494 nuclear factor of activated T cells, cytoplasmic, calci         | NM_016791.4, NM  |
| 27 | Gene Atp9b   | Atpc2b, I1b, At ATPase, class II, type 9B                                     | NM_015805.3, NM  |
| 23 | Gene Sall3   | Spalt, B130022 sal-like 3 (Drosophila)                                        | NM_178280.3      |
| 26 | Gene Mbp     | mld, shi, R7524 myelin basic protein                                          | NM_001025245.1   |
| 17 | Gene Zfp236  | AI447957, Zfp2 zinc finger protein 236                                        | NM_177832.3      |
| 25 | Gene Tshz1   | 5730407I04Rik teashirt zinc finger family member 1                            | NM_001081300.1   |
| 25 | Gene Zadh2   | Zadh2, C53004 zinc binding alcohol dehydrogenase, domain contain              | NM_146090.5      |
| 19 | Gene Cndp2   | Cndp2, 061001 CNDP dipeptidase 2 (metallopeptidase M20 family)                | NM_023149.2      |
| 17 | Gene Socs6   | STAT14, 15000 suppressor of cytokine signaling 6                              | NM_018821.4      |
| 30 | Gene Cpt1a   | C730027G07, (carnitine palmitoyltransferase 1a, liver                         | NM_013495.2      |
| 27 | Gene Mtl5    | Mtl5, tesmin metallothionein-like 5, testis-specific (tesmin)                 | NM_001039658.1   |
| 27 | Gene Ppp6r3  | 4930528G08Ri protein phosphatase 6, regulatory subunit 3                      | NM_029456.2, NM  |
| 27 | Gene Lrp5    | LR3, OPPG, mkl low density lipoprotein receptor-related protein 5             | NM_008513.3      |
| 42 | Gene Suv420h | KMT5B, Suv420 suppressor of variegation 4-20 homolog 1 (Drosophi              | NM_144871.4, NM  |
| 40 | Gene Chka    | Chetk-alpha, E choline kinase alpha                                           | NM_001025566.1,  |
| 31 | Gene Cabp4   | Cabp4, 241003 calcium binding protein 4                                       | NM_144532.2      |
| 31 | Gene Gpr152  | Gpr152, A9300 G protein-coupled receptor 152                                  | NM_206973.2      |
| 31 | Gene Coro1b  | Coro1b coronin, actin binding protein 1B                                      | NM_011778.2      |
| 31 | Gene Ptprcap | LSM-1, Ptprcap protein tyrosine phosphatase, receptor type, C poly            | NM_016933.3      |
| 31 | Gene Rps6kb2 | Rps6kb2, S6K2 ribosomal protein S6 kinase, polypeptide 2                      | NM_021485.2      |
| 21 | Gene Tbc1d10 | Tbc1d10c, 181 TBC1 domain family, member 10c                                  | NM_178650.3      |
| 21 | Gene Ppp1ca  | Ppp1c, dism2, protein phosphatase 1, catalytic subunit, alpha isofo           | NM_031868.2      |
| 21 | Gene Rad9a   | Rad9, Rad9a RAD9 homolog A                                                    | NM_011237.2      |
| 23 | Gene Clcf1   | Clcf1, CLC, Bsf: cardiostrophin-like cytokine factor 1                        | NM_019952.3      |
| 31 | Gene Kdm2a   | Cxxc8, Jhdm1a lysine (K)-specific demethylase 2A                              | NM_001001984.2   |
| 43 | Gene Pcx     | Pcx, Pcb, Pc pyruvate carboxylase                                             | NM_008797.3, NM  |
| 40 | Gene Lrfn4   | MGC36464, BC leucine rich repeat and fibronectin type III domain c            | NM_153388.4      |
| 40 | Gene Rce1    | D19Ert98e, DRCE1 homolog, prenyl protein peptidase (S. cerevisi               | NM_023131.1      |
| 40 | Gene Gm960   | Gm960 predicted gene 960                                                      | NM_001033447.3   |
| 25 | Gene Sptbn2  | KIAA0302, MG spectrin beta, non-erythrocytic 2                                | NM_021287.1      |
| 25 | Gene Rbm4b   | Rbm4b, Lark2, RNA binding motif protein 4B                                    | NM_025717.3      |
| 26 | Gene Actn3   | Actn3, MGC13 actinin alpha 3                                                  | NM_013456.1      |
| 26 | Gene Zdhhc24 | 5730496N17Ri zinc finger, DHHC domain containing 24                           | NM_027476.3, NM  |
| 26 | Gene Bbs1    | Bbs1, AI45124 Bardet-Biedl syndrome 1 (human)                                 | NM_001033128.3   |
| 26 | Gene Peli3   | A930011L17, E pellino 3                                                       | NM_172835.3      |
| 37 | Gene Slc29a2 | Ent2, Der12, H solute carrier family 29 (nucleoside transporters), m          | NM_007854.3      |

|    |              |                                                                      |                  |
|----|--------------|----------------------------------------------------------------------|------------------|
| 37 | Gene B3gnt1  | B3gnt1, iGNT, UDP-GlcNAc:betaGal beta-1,3-N-acetylglucosaminyl       | NM_175383.2      |
| 37 | Gene Brms1   | AV003220, AV breast cancer metastasis-suppressor 1                   | NM_134155.1      |
| 30 | Gene Cd248   | Cd164l1, 2610 CD248 antigen, endosalin                               | NM_054042.2      |
| 30 | Gene Tmem15  | Tmem151, Tm transmembrane protein 151A                               | NM_001001885.1   |
| 25 | Gene Cnih2   | MGC118475, C cornichon homolog 2 (Drosophila)                        | NM_009920.3      |
| 25 | Gene Rab1b   | 1110011F09Ri RAB1B, member RAS oncogene family                       | NM_029576.3      |
| 32 | Gene Klc2    | KLC-2, Klc2, 80 kinesin light chain 2                                | NM_008451.2, NR  |
| 31 | Gene Pacs1   | AI325977, Pac: phosphofurin acidic cluster sorting protein 1         | NM_153129.2      |
| 31 | Gene Sf3b2   | SF3b1, Sf3b2, splicing factor 3b, subunit 2                          | NM_030109.2      |
| 24 | Gene Gal3st3 | Gal3st3                                                              | NM_001024717.2   |
| 34 | Gene Banf1   | Banf1, Bcrp1, barrier to autointegration factor 1                    | NM_011793.2, NM  |
| 34 | Gene Eif1ad  | 2010003J03Ri eukaryotic translation initiation factor 1A domain co   | NM_027236.2      |
| 35 | Gene Sart1   | Sart1, U5-110k squamous cell carcinoma antigen recognized by T ce    | NM_016882.3      |
| 35 | Gene D33005  | D330050I16Ri RIKEN cDNA D330050I16 gene                              | NR_033224.1      |
| 35 | Gene Tsga10i | 1810013N20Ri testis specific 10 interacting protein                  | XM_003085377.2,  |
| 32 | Gene 4930481 | 4930481A15Ri RIKEN cDNA 4930481A15 gene                              | NR_015545.1, NR_ |
| 32 | Gene Drap1   | 2310074H19Ri Dr1 associated protein 1 (negative cofactor 2 alpha)    | NM_024176.1      |
| 32 | Gene AI83718 | Bles03, N2817 expressed sequence AI837181                            | NM_134149.2, NM  |
| 37 | Gene Fosl1   | Fra1, fra-1, AV fos-like antigen 1                                   | NM_010235.2      |
| 37 | Gene Ccdc85b | MGC67311, AI coiled-coil domain containing 85B                       | NM_001243307.1   |
| 37 | Gene Fibp    | 3010027N18Ri fibroblast growth factor (acidic) intracellular binding | NM_001253832.1   |
| 37 | Gene Ctsw    | lymphopain, C cathepsin W                                            | NM_009985.4      |
| 40 | Gene Efemp2  | Fbln4, MBP1, epidermal growth factor-containing fibulin-like extr    | NM_021474.3, NM  |
| 40 | Gene Mus81   | AW045863, M MUS81 endonuclease homolog (yeast)                       | NM_027877.3      |
| 40 | Gene Cfl1    | AA959946, Colcofilin 1, non-muscle                                   | NM_007687.5      |
| 40 | Gene Snx32   | B930037P14Ri sorting nexin 32                                        | NM_001024560.2   |
| 20 | Gene Ovol1   | Ovo1, Ovol1, nOVO homolog-like 1 (Drosophila)                        | NM_019935.3      |
| 20 | Gene Ap5b1   | Ap5b1, Gm962 adaptor-related protein complex 5, beta 1 subunit       | NM_001033448.2   |
| 32 | Gene Rnaseh2 | 1500026D16Ri ribonuclease H2, subunit C                              | NM_026616.2      |
| 32 | Gene Kat5    | AI839539, Tip5K(lysine) acetyltransferase 5                          | NM_178637.2, NM  |
| 25 | Gene Rela    | Rela, p65 v-rel reticuloendotheliosis viral oncogene homolog         | NM_009045.4      |
| 21 | Gene Sipa1   | Spa1, KIAA407 signal-induced proliferation associated gene 1         | NM_001164568.1   |
| 30 | Gene Pcnxl3  | Pcnxl3, mKIAA pecanex-like 3 (Drosophila)                            | NM_144868.3      |
| 30 | Gene Map3k1  | PTK1, 2610017 mitogen-activated protein kinase kinase kinase 11      | NM_022012.3      |
| 40 | Gene Ehbp1l1 | Ehbp1l1, G430 EH domain binding protein 1-like 1                     | NM_053252.3, NM  |
| 40 | Gene Fam89b  | Fam89b, 1110 family with sequence similarity 89, member B            | NM_181452.2, NM  |
| 40 | Gene Ssca1   | C184L, 150001 Sjogren's syndrome/scleroderma autoantigen 1 hon       | NM_020491.4      |
| 40 | Gene Gm1081  | Gm10815, ENS predicted gene 10815                                    | XR_141499.1, XR_ |
| 30 | Gene Ltbp3   | Ltbp2, mFLJ00 latent transforming growth factor beta binding prot    | NM_008520.2      |
| 16 | Gene Scyl1   | mdf, C85140, SCY1-like 1 (S. cerevisiae)                             | NM_023912.2      |
| 33 | Gene Malat1  | NEAT2, AI6479 metastasis associated lung adenocarcinoma transcri     | NR_002847.2      |
| 28 | Gene Cdc42ep | Cep2, Cdc42ep CDC42 effector protein (Rho GTPase binding) 2          | NM_026772.2      |
| 22 | Gene Capn1   | Capa1, mu-calpain 1                                                  | NM_007600.3, NM  |
| 22 | Gene Gm1081  | ENSMUSG000 predicted gene 10814                                      | NR_045783.1      |
| 28 | Gene Gm8034  | Gm8034, EG66 thymosin, beta 10 pseudogene                            |                  |
| 43 | Gene Syvn1   | 1200010C09Ri synovial apoptosis inhibitor 1, synoviolin              | NM_028769.5, NM  |
| 43 | Gene Mrpl49  | Mrpl49, Nof1, mitochondrial ribosomal protein L49                    | NM_026246.3      |

|    |               |                                                                       |                 |
|----|---------------|-----------------------------------------------------------------------|-----------------|
| 43 | Gene Fau      | MNSFbeta, Fa Finkel-Biskis-Reilly murine sarcoma virus (FBR-MuSV      | NM_001160239.2  |
| 43 | Gene Znhit2   | Znhit2-ps, Znh zinc finger, HIT domain containing 2                   | NM_013859.2     |
| 43 | Gene Tm7sf2   | C14SR, 311004transmembrane 7 superfamily member 2                     | NM_028454.2     |
| 43 | Gene Vps51    | 1110014N23Rivacuolar protein sorting 51 homolog (S. cerevisiae)       | NM_001081041.1  |
| 26 | Gene BC048609 | BC048609 cDNA sequence BC048609                                       | NM_001111317.1  |
| 26 | Gene Zfp1     | 1500015B20Ri zinc finger like protein 1                               | NM_024231.2     |
| 26 | Gene Cdca5    | AL024086, Cdc cell division cycle associated 5                        | NM_026410.3     |
| 32 | Gene Arl2     | Arl2, AW5533:ADP-ribosylation factor-like 2                           | NM_019722.3     |
| 16 | Gene Gpha2    | Gpha2, zsig51, glycoprotein hormone alpha 2                           | NM_130453.3     |
| 38 | Gene Ppp2r5b  | Ppp2r5b, B'bet protein phosphatase 2, regulatory subunit B (B56), t   | NM_198168.3     |
| 38 | Gene Atg2a    | Atg2a, A830054M12, MGC67447, 1810013C15Rik, mKIAA0404, BC             | NM_194348.3     |
| 51 | Gene Ehd1     | Ehd1, RME-1, IEH-domain containing 1                                  | NM_010119.5     |
| 22 | Gene Cdc42bp  | Cdc42bpg, BC CDC42 binding protein kinase gamma (DMPK-like)           | NM_001033342.1  |
| 22 | Gene Men1     | Men1, AW045 multiple endocrine neoplasia 1                            | NM_001168488.1  |
| 22 | Gene Map4k2   | Map4k2, MGC mitogen-activated protein kinase kinase kinase kina       | NM_009006.2     |
| 32 | Gene Sf1      | WBP4, BB0947splicing factor 1                                         | NM_011750.2, NM |
| 26 | Gene Nrxn2    | mKIAA0921, 6. neurexin II                                             | NM_001205234.1  |
| 23 | Gene Rps6ka4  | 90kDa, 111006 ribosomal protein S6 kinase, polypeptide 4              | NM_019924.1     |
| 23 | Gene Mir5046  | mu-mir-5046, microRNA 5046                                            | NR_039555.1     |
| 23 | Gene Ccdc88b  | Ccdc88b, 2610 coiled-coil domain containing 88B                       | NM_001081291.1  |
| 30 | Gene Tex40    | MLZ-622, A43(testis expressed 40                                      | NM_001039494.2  |
| 33 | Gene Kcnk4    | MGC144821, Potassium channel, subfamily K, member 4                   | NM_008431.2     |
| 33 | Gene Gpr137   | Gpr137, AI428 G protein-coupled receptor 137                          | NM_001177360.1  |
| 33 | Gene Bad      | Bbc2, AI32500 BCL2-associated agonist of cell death                   | NM_007522.2     |
| 23 | Gene Plcb3    | Plcb3, mKIAA4 phospholipase C, beta 3                                 | NM_008874.3     |
| 23 | Gene Ppp1r14  | PHI-1, PLCB3N protein phosphatase 1, regulatory (inhibitor) subuni    | NM_008889.2     |
| 23 | Gene Fkbp2    | 13kDa, Fkbp2, FK506 binding protein 2                                 | NM_008020.3, NM |
| 23 | Gene Vegfb    | VEGF-B, Vrf, Vascular endothelial growth factor B                     | NM_001185164.1, |
| 22 | Gene Dnajc4   | Hspf2, Dnajc4, DnaJ (Hsp40) homolog, subfamily C, member 4            | NM_020566.1     |
| 22 | Gene Nudt22   | 0610006K04Ri nudix (nucleoside diphosphate linked moiety X)-type      | NM_026675.2     |
| 22 | Gene Trpt1    | MGC41710, Trp tRNA phosphotransferase 1                               | NM_153597.2, NR |
| 24 | Gene Macrodom | D930010J01Ril MACRO domain containing 1                               | NM_134147.4     |
| 24 | Gene Otub1    | AI850305, Otu OTU domain, ubiquitin aldehyde binding 1                | NM_134150.2     |
| 24 | Gene Cox8a    | COX8L, Cox8a                                                          | NM_007750.2     |
| 34 | Gene Naa40    | AU023197, 49: N(alpha)-acetyltransferase 40, NatD catalytic subuni    | NM_027643.1     |
| 24 | Gene Rcor2    | Rcor, 1A13, AV REST corepressor 2                                     | NM_054048.3     |
| 24 | Gene Mark2    | mKIAA4207, P: MAP/microtubule affinity-regulating kinase 2            | NM_001080388.1  |
| 33 | Gene AI84614  | 1700105P06Ri expressed sequence AI846148                              | NM_001033139.3  |
| 33 | Gene 1700105  | 1700105P06Ri RIKEN cDNA 1700105P06 gene                               | NR_045703.1     |
| 31 | Gene 2700081  | AI848741, AW RIKEN cDNA 2700081O15 gene                               | NM_175381.6     |
| 31 | Gene Rtn3     | RTN3-A1, AW5 reticulon 3                                              | NM_001003933.1  |
| 26 | Gene Slc3a2   | Ly-m10, 4F2, N solute carrier family 3 (activators of dibasic and neu | NM_001161413.1  |
| 32 | Gene Snhg1    | Snhg1 small nucleolar RNA host gene (non-protein coding)              | NR_002896.3     |
| 32 | Gene Snord22  | U22, Snord22, small nucleolar RNA, C/D box 22                         | NR_004445.1     |
| 32 | Gene Wdr74    | Wdr74, AA407 WD repeat domain 74                                      | NM_134139.1     |
| 32 | Gene 1700092  | 1700092M07R RIKEN cDNA 1700092M07 gene                                | NM_001177347.1  |
| 34 | Gene Stx5a    | Stx5, Stx5a, 06 syntaxin 5A                                           | NM_019829.4, NM |

|    |              |                                                                    |                 |
|----|--------------|--------------------------------------------------------------------|-----------------|
| 36 | Gene Nxf1    | Mex67, Mvb1, Nxf1, Tap                                             | NM_016813.2     |
| 36 | Gene Tmem22  | 0610006I08Rik transmembrane protein 223                            | NM_025791.1     |
| 36 | Gene Tmem17  | MGC151338, C transmembrane protein 179B                            | NM_026325.3, NR |
| 36 | Gene Taf6l   | Paf65a, PAF65, TAF6-like RNA polymerase II, p300/CBP-associated f  | NM_001177798.1, |
| 24 | Gene 5730408 | 5730408K05Ri RIKEN cDNA 5730408K05 gene                            | NR_027866.1     |
| 24 | Gene Mir5136 | mu-mir-5136, microRNA 5136                                         | NR_039598.1     |
| 24 | Gene 1810009 | 1810009A15Ri RIKEN cDNA 1810009A15 gene                            | NM_025463.2     |
| 24 | Gene Ints5   | Ints5, 1110055 integrator complex subunit 5                        | NM_176843.3     |
| 24 | Gene Ganab   | G2an, GluII, M alpha glucosidase 2 alpha neutral subunit           | NM_008060.1     |
| 24 | Gene B3gat3  | 2810405M13R beta-1,3-glucuronyltransferase 3 (glucuronosyltrans    | NM_024256.2     |
| 24 | Gene Rom1    | Rgsc1156, M1(rod outer segment membrane protein 1                  | NM_009073.4     |
| 34 | Gene Eml3    | BC022146, MGechinoderm microtubule associated protein like 3       | NM_144872.1     |
| 34 | Gene Mta2    | Mta1l1, Mata1 metastasis-associated gene family, member 2          | NM_011842.3     |
| 25 | Gene Tut1    | Rbm21, Tut1, 3-terminal uridylyl transferase 1, U6 snRNA-specific  | NM_197993.2     |
| 25 | Gene Eef1g   | AA407312, EF1eukaryotic translation elongation factor 1 gamma      | NM_026007.4     |
| 19 | Gene Ahnak   | 1110004P15Ri AHNAK nucleoprotein (desmoyokin)                      | NM_009643.1, NM |
| 27 | Gene Incenp  | Incenp, AU019 inner centromere protein                             | NM_016692.3     |
| 41 | Gene Fth1    | HfT, AL033366 ferritin heavy chain 1                               | NM_010239.1     |
| 41 | Gene Best1   | Bmd, Best1, m bestrophin 1                                         | NM_011913.2     |
| 22 | Gene Rab3il1 | Rab3ail1, AI11 RAB3A interacting protein (rabin3)-like 1           | NM_144538.2     |
| 22 | Gene Fads3   | AI464531, Fad fatty acid desaturase 3                              | NM_021890.3     |
| 25 | Gene Fads2   | Fads2, Fadsd2, fatty acid desaturase 2                             | NM_019699.1     |
| 32 | Gene Fads1   | AI317215, DSC fatty acid desaturase 1                              | NM_146094.2     |
| 30 | Gene Dagla   | Nsddr, Dagla, I diacylglycerol lipase, alpha                       | NM_198114.2     |
| 25 | Gene Syt7    | Syt7, AI851541 synaptotagmin VII                                   | NM_173068.2, NM |
| 25 | Gene Lrrc10b | Gm705, Lrrc10 leucine rich repeat containing 10B                   | NM_001111140.2  |
| 29 | Gene Sdhaf2  | AW049997, M succinate dehydrogenase complex assembly factor 2      | NM_025333.4     |
| 29 | Gene Cpsf7   | MGC46982, AI cleavage and polyadenylation specific factor 7        | NM_172302.3, NM |
| 17 | Gene Tmem21  | 4921533J23Ri transmembrane protein 216                             | NM_026798.2     |
| 19 | Gene Tmem13  | 2900055D14Ri transmembrane protein 138                             | NM_028411.3     |
| 19 | Gene Cyb561a | BC065078, Cyt cytochrome b561 family, member A3                    | NM_201351.1     |
| 22 | Gene Dak     | BC021917, Dal dihydroxyacetone kinase 2 homolog (yeast)            | NM_145496.1     |
| 22 | Gene Ddb1    | Ddb1, AA4085 damage specific DNA binding protein 1                 | NM_015735.1     |
| 25 | Gene Vps37c  | Vps37c, AU042 vacuolar protein sorting 37C (yeast)                 | NM_181403.2     |
| 18 | Gene Tmem10  | C77652, 1110C transmembrane protein 109                            | NM_134142.1     |
| 32 | Gene Prpf19  | AL024362, Sne PRP19/PSO4 pre-mRNA processing factor 19 homolog     | NM_001253843.1  |
| 26 | Gene Gpr44   | MGC130436, CG protein-coupled receptor 44                          | NM_009962.2     |
| 26 | Gene Ccdc86  | 4933411H20Ri coiled-coil domain containing 86                      | NM_023731.3     |
| 35 | Gene Dtx4    | RNF155, Dtx4, deltex 4 homolog (Drosophila)                        | NM_172442.3     |
| 16 | Gene Fam111  | Fam111a, AW4 family with sequence similarity 111, member A         | NM_026640.2     |
| 16 | Gene A33004  | A330040F15Ri RIKEN cDNA A330040F15 gene                            | NR_015503.1     |
| 16 | Gene Gm4952  | Gm4952, EG24 predicted gene 4952                                   | NM_001013762.2, |
| 24 | Gene Tle4    | Bce1, ESTM13, transducin-like enhancer of split 4, homolog of Dros | NM_011600.2     |
| 23 | Gene Psat1   | D8Erd814e, P phosphoserine aminotransferase 1                      | NM_177420.2, NM |
| 24 | Gene Cep78   | 5730599I05Ri centrosomal protein 78                                | NM_198019.2     |
| 24 | Gene C13006  | C130060C02Ri RIKEN cDNA C130060C02 gene                            | NR_045355.1     |
| 36 | Gene Gnaq    | Gq, Galphaq, A guanine nucleotide binding protein, alpha q polypep | NM_008139.5     |

|    |                   |                                                                     |                 |
|----|-------------------|---------------------------------------------------------------------|-----------------|
| 22 | Gene Gna14        | Gna14, AU023 guanine nucleotide binding protein, alpha 14           | NM_008137.4     |
| 22 | Gene Vps13a       | 4930516E05Ri vacuolar protein sorting 13A (yeast)                   | NM_173028.4     |
| 23 | Gene Rfk          | Rfk, KOI-4, 061 riboflavin kinase                                   | NM_019437.3     |
| 22 | Gene Pcsk5        | PC6, SPC6, PC5 proprotein convertase subtilisin/kexin type 5        | NM_001163144.1  |
| 29 | Gene Ostf1        | SH3P2, Sh3d3, osteoclast stimulating factor 1                       | NM_017375.3     |
| 29 | Gene Nmrk1        | AA408380, BC016495, Nr1, D630020N23Rik, MGC25909, Nmrk1             | NM_145497.2     |
| 23 | Gene 2410127      | 2410127L17Ril RIKEN cDNA 2410127L17 gene                            | NM_026120.4, XM |
| 23 | Gene D030056      | D030056L22Ri RIKEN cDNA D030056L22 gene                             | NM_177640.4     |
| 29 | Gene LOC101056249 | uncharacterized LOC101056249                                        | XM_003945593.1  |
| 29 | Gene Zfand5       | Zfp216, 58304 zinc finger, AN1-type domain 5                        | NM_009551.5     |
| 20 | Gene 1110059      | 1110059E24Ri RIKEN cDNA 1110059E24 gene                             | NM_025423.2     |
| 20 | Gene Abhd17b      | Abhd17b, Fam abhydrolase domain containing 17B                      | NM_146096.3     |
| 24 | Gene Tmem2        | Tmem2, MGC1transmembrane protein 2                                  | NM_001033759.1  |
| 31 | Gene Klf9         | Bteb1, 231005 Kruppel-like factor 9                                 | NM_010638.4     |
| 31 | Gene Mir1192      | Mir1192, mmu microRNA 1192                                          | NR_035423.1     |
| 20 | Gene Smc5         | Smc5, MGC30 structural maintenance of chromosomes 5                 | NM_001252684.1  |
| 21 | Gene Ptar1        | Ptar1, 170008 protein prenyltransferase alpha subunit repeat cont   | NM_028208.1     |
| 26 | Gene Apba1        | Apba1, X11alp amyloid beta (A4) precursor protein binding, family   | NM_177034.3     |
| 32 | Gene Pip5k1b      | Pipk5b, Pipk5a phosphatidylinositol-4-phosphate 5-kinase, type 1 b  | NM_008846.2     |
| 32 | Gene Fam122       | 2900009I07Rik family with sequence similarity 122, member A         | NM_026520.3     |
| 25 | Gene Kank1        | A930031B09Ri KN motif and ankyrin repeat domains 1                  | NM_181404.5     |
| 21 | Gene Dmrt1        | Dmrt1 doublesex and mab-3 related transcription factor 1            | NM_015826.5     |
| 20 | Gene Dmrt3        | Dmrt3 doublesex and mab-3 related transcription factor 3            | NM_177360.3     |
| 25 | Gene Smarca2      | brm, SNF2alph SWI/SNF related, matrix associated, actin dependen    | NM_026003.2, NM |
| 25 | Gene Rfx3         | C230093O12Ri regulatory factor X, 3 (influences HLA class II expres | NM_011265.3, NM |
| 21 | Gene Glis3        | E230012L24, G GLIS family zinc finger 3                             | NM_175459.5     |
| 21 | Gene D930032      | D930032P07Ri RIKEN cDNA D930032P07 gene                             | NR_045330.1     |
| 25 | Gene Cdc37l1      | 2700033A15Ri cell division cycle 37-like 1                          | NM_025950.2     |
| 30 | Gene Rcl1         | C76567, Rnac, RNA terminal phosphate cyclase-like 1                 | NM_021525.2     |
| 27 | Gene A930007      | A930007I19Ril RIKEN cDNA A930007I19 gene                            | NR_015567.2     |
| 27 | Gene C030046      | C130057E09Ri RIKEN cDNA C030046E11 gene                             | NM_001081319.1  |
| 34 | Gene 9930021      | 9930021J03Ril RIKEN cDNA 9930021J03 gene                            | NM_172836.3     |
| 34 | Gene Ranbp6       | FLJ11120, C63 RAN binding protein 6                                 | NM_177721.4     |
| 33 | Gene Uhrf2        | AW214556, 23 ubiquitin-like, containing PHD and RING finger doma    | NM_144873.2     |
| 28 | Gene Sgms1        | Sor1, Mob, MC sphingomyelin synthase 1                              | NM_144792.4, NM |
| 28 | Gene 2700046      | 2700046G09Ri RIKEN cDNA 2700046G09 gene                             | NR_033198.1     |
| 24 | Gene Minpp1       | Minpp1, AA40 multiple inositol polyphosphate histidine phosphata    | NM_010799.2     |
| 23 | Gene Atad1        | Thorase, AW1 ATPase family, AAA domain containing 1                 | NM_026487.3     |
| 28 | Gene Pten         | AI463227, Pter phosphatase and tensin homolog                       | NM_008960.2     |
| 31 | Gene Stambpl      | ALMalpha, Sta STAM binding protein like 1                           | NM_029682.4     |
| 29 | Gene Pank1        | 5430426F23Ril pantothenate kinase 1                                 | NM_023792.1, NM |
| 21 | Gene Hectd2       | A630025O09R HECT domain containing 2                                | NM_001163471.1  |
| 29 | Gene Tnks2        | Tank2, AI6624 tankyrase, TRF1-interacting ankyrin-related ADP-rib   | NM_001163635.1  |
| 38 | Gene Fgfbp3       | Fgfbp3, 26103 fibroblast growth factor binding protein 3            | NM_028263.1     |
| 38 | Gene Btaf1        | Btaf1, AI4145C BTA1 RNA polymerase II, B-TFIID transcription fact   | NM_001080706.1  |
| 26 | Gene Cpeb3        | Cpeb3, 48314 cytoplasmic polyadenylation element binding protei     | NM_198300.2     |
| 26 | Gene A330032      | A330032B11Ri RIKEN cDNA A330032B11 gene                             | NR_045329.1     |



|    |               |                 |                                                       |                 |
|----|---------------|-----------------|-------------------------------------------------------|-----------------|
| 25 | Gene March5   | 5730499H23Ri    | membrane-associated ring finger (C3HC4) 5             | NM_027314.3, NM |
| 42 | Gene Kif11    | Kif11, Kif8,    | Kif1 kinesin family member 11                         | NM_010615.1     |
| 17 | Gene Exoc6    | 4833405E05Ri    | exocyst complex component 6                           | NM_175353.2     |
| 26 | Gene I830134I | I830134H01Ri    | RIKEN cDNA I830134H01 gene                            | XR_105963.2     |
| 26 | Gene Cep55    | 2700032M20R     | centrosomal protein 55                                | NM_028760.2, NM |
| 29 | Gene Tbc1d12  | BC033574, MC    | TBC1D12: TBC1 domain family, member 12                | NM_145952.3     |
| 20 | Gene Hells    | LSH, Hells,     | E13 helicase, lymphoid specific                       | NM_008234.3     |
| 26 | Gene Cc2d2b   | Cc2d2b, EG66    | coiled-coil and C2 domain containing 2B               | XM_001000795.4, |
| 26 | Gene Ccnj     | D430039C20Ri    | cyclin J                                              | NM_172839.4     |
| 23 | Gene Zfp518a  | 2810401C22Ri    | zinc finger protein 518A                              | NM_028319.1     |
| 27 | Gene Tm9sf3   | Tm9sf3, Smbp,   | transmembrane 9 superfamily member 3                  | NM_133352.2     |
| 27 | Gene Pik3ap1  | Pik3ap1, 1810   | (phosphoinositide-3-kinase adaptor protein 1          | NM_031376.3     |
| 26 | Gene Frat1    | Frat1, AW060    | frequently rearranged in advanced T cell lymphoma:    | NM_008043.3     |
| 23 | Gene Frat2    | Frat2, MGC37    | frequently rearranged in advanced T cell lymphoma:    | NM_177603.3     |
| 30 | Gene Rrp12    | mKIAA0690, Rr   | ribosomal RNA processing 12 homolog (S. cerevisiae    | NM_199447.2     |
| 24 | Gene Pgam1    | Pgam1, MGC1     | phosphoglycerate mutase 1                             | NM_023418.2     |
| 42 | Gene Exosc1   | AI447561, 261   | exosome component 1                                   | NM_025644.4, NM |
| 42 | Gene Zdhhc16  | 1500015N03Ri    | zinc finger, DHHC domain containing 16                | NM_023740.2     |
| 42 | Gene Mms19    | C86341, AI316   | MMS19 (MET18 S. cerevisiae)                           | NM_028152.3     |
| 31 | Gene Ubtd1    | BC016129, MC    | ubiquitin domain containing 1                         | NM_145500.3     |
| 38 | Gene Marveld  | MGC62793, AI    | MARVEL (membrane-associating) domain containing       | NM_183195.2     |
| 25 | Gene Golga7b  | AI839934, 493   | golgi autoantigen, golgin subfamily a, 7B             | NM_027694.2, NM |
| 23 | Gene R3hcc1l  | C10orf28, D19   | R3H domain and coiled-coil containing 1 like          | NM_177464.4     |
| 21 | Gene Nkx2-3   | tinman, Nkx2-   | NK2 transcription factor related, locus 3 (Drosophila | NM_008699.2     |
| 22 | Gene Entpd7   | Entpd7, LALP1   | ectonucleoside triphosphate diphosphohydrolase 7      | NM_053103.5     |
| 25 | Gene Cox15    | Cox15, 290002   | cytochrome c oxidase assembly protein 15              | NM_144874.4     |
| 25 | Gene Cutc     | AI326282, 231   | cutC copper transporter homolog (E.coli)              | NM_025530.3, NM |
| 19 | Gene Dnmbp    | 2410003L07Ri    | dynamin binding protein                               | NM_028029.3     |
| 32 | Gene Erlin1   | 2810439N09Ri    | ER lipid raft associated 1                            | NM_145502.3, NM |
| 32 | Gene Chuk     | Fbx24, Ikka, Fb | conserved helix-loop-helix ubiquitous kinase          | NM_007700.2, NM |
| 29 | Gene Cwf19l1  | AI854304, AV3   | CWF19-like 1, cell cycle control (S. pombe)           | NM_001081077.1  |
| 19 | Gene Pax2     | Pax-2, Pax2, O  | paired box gene 2                                     | NM_011037.4     |
| 19 | Gene 1700039  | 1700039E22Ri    | RIKEN cDNA 1700039E22 gene                            | NR_045315.1     |
| 32 | Gene Fam178:  | Fam178a, AU0    | family with sequence similarity 178, member A         | NM_001081225.1  |
| 36 | Gene Sema4g   | AW554132, AI    | sema domain, immunoglobulin domain (Ig), transme      | NM_011976.1     |
| 36 | Gene Mrpl43   | bMRP36a, Mr     | mitochondrial ribosomal protein L43                   | NM_053164.3     |
| 36 | Gene Peo1     | Twinkl, PEO, M  | (progressive external ophthalmoplegia 1 (human)       | NM_153796.3     |
| 36 | Gene Lzts2    | MGC7094, LAF    | leucine zipper, putative tumor suppressor 2           | NM_145503.2, NM |
| 36 | Gene Kazald1  | Bono1, IGFBP-   | Kazal-type serine peptidase inhibitor domain 1        | NM_178929.4     |
| 19 | Gene Lbx1     | Lbx1, Lbx1h     | ladybird homeobox homolog 1 (Drosophila)              | NM_010691.5     |
| 24 | Gene Fbxw4    | Fbw4, SHSF3,    | F-box and WD-40 domain protein 4                      | NM_013907.2     |
| 29 | Gene Fgf8     | Fgf8, MGC596:   | fibroblast growth factor 8                            | NM_010205.2, NM |
| 29 | Gene Npm3     | Npm3, Nub1      | nucleoplasmin 3                                       | NM_008723.1     |
| 30 | Gene Mgea5    | mKIAA0679, 2:   | meningioma expressed antigen 5 (hyaluronidase)        | NM_023799.3     |
| 30 | Gene Kcnip2   | Kcnip2, KChIP2  | Kv channel-interacting protein 2                      | NM_030716.2, NM |
| 21 | Gene 9130011  | AI431055, 913   | RIKEN cDNA 9130011E15 gene                            | NM_198296.2     |
| 21 | Gene Hps6     | Hps6, BLOC2, I  | Hermansky-Pudlak syndrome 6                           | NM_176785.3     |

|    |              |                                                                          |                  |
|----|--------------|--------------------------------------------------------------------------|------------------|
| 24 | Gene Ldb1    | Ldb1, CLIM2, LIM domain binding 1                                        | NM_010697.1, NM  |
| 61 | Gene Pprc1   | MGC12121, PF peroxisome proliferative activated receptor, gamma          | NM_001081214.1   |
| 22 | Gene Nolc1   | mKIAA0035, A nucleolar and coiled-body phosphoprotein 1                  | NM_001039351.1   |
| 26 | Gene Elovl3  | CIN-2, Elovl3, (elongation of very long chain fatty acids (FEN1/Elo2,    | NM_007703.2      |
| 26 | Gene Pitx3   | ak, Pitx3, Ptx3 paired-like homeodomain transcription factor 3           | NM_008852.4      |
| 20 | Gene Gbf1    | AI035702, Gbf golgi-specific brefeldin A-resistance factor 1             | NM_178930.3      |
| 35 | Gene 4833438 | 4833438C02Ri RIKEN cDNA 4833438C02 gene                                  | XR_107188.1, XR_ |
| 35 | Gene Nfkb2   | NF-kappaB2, p nuclear factor of kappa light polypeptide gene enha        | NM_001177369.1   |
| 35 | Gene Psd     | Efa6a, mKIAA2 pleckstrin and Sec7 domain containing                      | NM_028627.2      |
| 29 | Gene Fbxl15  | 0710008C12Ri F-box and leucine-rich repeat protein 15                    | NM_133694.2      |
| 29 | Gene Cuedc2  | Cuedc2, 30100 CUE domain containing 2                                    | NM_001164290.1   |
| 29 | Gene Mir146b | Mir146b, Mirn microRNA 146b                                              | NR_030468.1      |
| 29 | Gene 2310034 | 2310034G01Ri RIKEN cDNA 2310034G01 gene                                  | NR_040418.1      |
| 29 | Gene Tmem18  | Tmem180, 49% transmembrane protein 180                                   | NM_029186.2      |
| 49 | Gene Trim8   | Trim8, AA408% tripartite motif-containing 8                              | NM_053100.2      |
| 22 | Gene Arl3    | Arl3                                                                     | NM_019718.2      |
| 22 | Gene Sfxn2   | C79732, F6301 sideroflexin 2                                             | NM_053196.3      |
| 20 | Gene Nt5c2   | Gmp, 2010002 5'-nucleotidase, cytosolic II                               | NM_001164363.1   |
| 20 | Gene Ina     | NF-66, Ina, AVI internexin neuronal intermediate filament protein, %     | NM_146100.4      |
| 30 | Gene Taf5    | 6330528C20Ri TAF5 RNA polymerase II, TATA box binding protein (          | NM_177342.3      |
| 22 | Gene Gm6970  | Gm6970, EG62 histone cluster 1, H1b pseudogene                           |                  |
| 26 | Gene Neurl1a | Rnf67, AI4509: neuralized homolog 1A (Drosophila)                        | NM_021360.4, NM  |
| 26 | Gene Sh3pxd2 | AI413738, AA5 SH3 and PX domains 2A                                      | NM_008018.4, NM  |
| 21 | Gene Sfr1    | Sfr1, Meir5, 63 SWI5 dependent recombination repair 1                    | NM_026377.2      |
| 21 | Gene Wdr96   | AI429486, FLJ2WD repeat domain 96                                        | NM_027559.2      |
| 21 | Gene Gsto1   | AU018802, GS glutathione S-transferase omega 1                           | NM_010362.2      |
| 21 | Gene Gsto2   | Gsto2, 170002 glutathione S-transferase omega 2                          | NM_026619.2, NM  |
| 27 | Gene Itrip1  | mKIAA1754, It inositol 1,4,5-triphosphate receptor interacting prot      | NM_001001738.2   |
| 36 | Gene Xpnpep1 | sAMP, Xpnpep X-prolyl aminopeptidase (aminopeptidase P) 1, solu          | NM_133216.2      |
| 20 | Gene Add3    | R75380, AI463 adducin 3 (gamma)                                          | NM_013758.3, NM  |
| 43 | Gene Mxi1    | ENSMUSG000(Max interacting protein 1                                     | NM_001008542.2   |
| 24 | Gene Smndc1  | 4933440I19Rik survival motor neuron domain containing 1                  | NM_172429.2      |
| 31 | Gene Dusp5   | Dusp5, Gm337 dual specificity phosphatase 5                              | NM_001085390.1   |
| 31 | Gene Smc3    | HCAP, SmcD, S structural maintenance of chromosomes 3                    | NM_007790.3      |
| 22 | Gene Rbm20   | Rbm20, 20100 RNA binding motif protein 20                                | NM_001170847.1   |
| 31 | Gene Pdcd4   | Pdcd4, Ma3, D programmed cell death 4                                    | NM_011050.4, NM  |
| 31 | Gene Gm1978  | Gm19788 predicted gene, 19788                                            | XR_105988.1      |
| 24 | Gene Adra2a  | alpha(2A)AR, A adrenergic receptor, alpha 2a                             | NM_007417.4      |
| 26 | Gene Gpat    | GPAT1, GPAT, glycerol-3-phosphate acyltransferase, mitochondrial         | NM_008149.3      |
| 29 | Gene Zdhhc6  | C77369, AI462 zinc finger, DHHC domain containing 6                      | NM_025883.3, NM  |
| 29 | Gene Vti1a   | Vti1-rp2, MVti vesicle transport through interaction with t-SNAREs       | NM_016862.3      |
| 21 | Gene Tcf7l2  | Tcf-4, Tcf7l2, n transcription factor 7 like 2, T cell specific, HMG box | NM_009333.3, NM  |
| 27 | Gene Dclre1a | SNM1, mKIAA(DNA cross-link repair 1A, PSO2 homolog (S. cerevisia         | NM_018831.4      |
| 27 | Gene Nhlrc2  | 1200003G01Ri NHL repeat containing 2                                     | NM_025811.3      |
| 31 | Gene A630007 | Otg1, AI15970 RIKEN cDNA A630007B06 gene                                 | NM_170757.1      |
| 31 | Gene Tdrd1   | Tdrd1, MTR-1 tudor domain containing 1                                   | NM_031387.3, NM  |
| 25 | Gene Afap1l2 | C86904, KIAA1 actin filament associated protein 1-like 2                 | NM_001177796.1,  |

|    |                                                                                  |                  |
|----|----------------------------------------------------------------------------------|------------------|
| 31 | Gene B230217B230217O12R RIKEN cDNA B230217O12 gene                               | NR_040316.1      |
| 31 | Gene Fam160l Al450540, mKl family with sequence similarity 160, member B1        | NM_145505.4      |
| 32 | Gene Atrnl1 Al504415, Atrr attractin like 1                                      | NM_181415.4      |
| 18 | Gene Hspa12a 1700063D12Ri heat shock protein 12A                                 | NM_175199.3      |
| 30 | Gene Pdzd8 Pdzd8, AW228 PDZ domain containing 8                                  | NM_001033222.3   |
| 24 | Gene Emx2os Emx2os EMX2 opposite strand/antisense RNA (non-protein c             | NR_002863.2      |
| 24 | Gene Emx2 Pdo, Emx2 empty spiracles homeobox 2                                   | NM_010132.2      |
| 26 | Gene Rab11fip2 Rab11fip2, 49E RAB11 family interacting protein 2 (class I)       | NM_001033172.3   |
| 26 | Gene 493047C4930470F04Ri RIKEN cDNA 4930470F04 gene                              | XM_003945592.1,  |
| 29 | Gene D19ErtD19ErtD737e, DNA segment, Chr 19, ERATO Doi 737, expressed            | NM_029648.6      |
| 18 | Gene Prlhr Gpr10, Gm339 prolactin releasing hormone receptor                     | NM_201615.2      |
| 24 | Gene Cacul1 2700078E11Ri CDK2 associated, cullin domain 1                        | NM_001172096.1   |
| 25 | Gene Nanos1 Nanos1 nanos homolog 1 (Drosophila)                                  | NM_178421.3      |
| 33 | Gene Eif3a Eif3a, Eif3, mK eukaryotic translation initiation factor 3, subunit A | NM_010123.3      |
| 20 | Gene Fam171a Fam171a1, 96E family with sequence similarity 171, member A1        | NM_001081161.1   |
| 34 | Gene Nmt2 hNMT-2, Al60E N-myristoyltransferase 2                                 | NM_008708.1      |
| 24 | Gene Suv39h2 D030054H19R suppressor of variegation 3-9 homolog 2 (Drosophila)    | NM_022724.4, NR  |
| 26 | Gene Hspa14 NST-1, Hspa14 heat shock protein 14                                  | NM_015765.2      |
| 26 | Gene LOC100861945 uncharacterized LOC100861945                                   | XM_003688773.1,  |
| 26 | Gene Cdnf Cdnf, 9330140 cerebral dopamine neurotrophic factor                    | NM_177647.4      |
| 21 | Gene Camk1d A630059D12Ri calcium/calmodulin-dependent protein kinase ID          | NM_177343.3      |
| 29 | Gene Taf3 mTAFII140, TA TAF3 RNA polymerase II, TATA box binding protein (       | NM_027748.3      |
| 29 | Gene Atp5c1 1700094F02Ri ATP synthase, H+ transporting, mitochondrial F1 cor     | NM_020615.4, NM  |
| 25 | Gene Kin Kin, Kin17 antigenic determinant of rec-A protein                       | NM_025280.2      |
| 29 | Gene Pfkfb3 iPFK-2, E330016-phosphofructo-2-kinase/fructose-2,6-biphosphata      | NM_001177752.1   |
| 20 | Gene Rbm17 Rbm17, 27000 RNA binding motif protein 17                             | NM_152824.1      |
| 28 | Gene Fbxo18 Fbx18, Fbxo18 F-box protein 18                                       | NM_015792.1      |
| 28 | Gene Ankrd16 D430029B21Ri ankyrin repeat domain 16                               | NM_177268.4      |
| 44 | Gene Vim MGC102095, vimentin                                                     | NM_011701.4      |
| 17 | Gene St8sia6 Siat8f, Al3144E ST8 alpha-N-acetyl-neuraminide alpha-2,8-sialyltran | NM_145838.1      |
| 31 | Gene Ptpla Ptpla, HACD1 protein tyrosine phosphatase-like (proline instead o     | NM_001012396.2,  |
| 25 | Gene 492153C4921530L18Ri RIKEN cDNA 4921530L18 gene                              | NR_038162.1      |
| 25 | Gene Stam STAM1, Stam signal transducing adaptor molecule (SH3 domain ar         | NM_011484.2      |
| 25 | Gene Cacnb2 Cchb2, MGC12 calcium channel, voltage-dependent, beta 2 subunit      | NM_001252533.1,  |
| 23 | Gene Nsun6 Nsun6, 493341NOL1/NOP2/Sun domain family member 6                     | NM_028950.4, NM  |
| 23 | Gene Arl5b Arl5b, 493058E ADP-ribosylation factor-like 5B                        | NM_029466.4      |
| 16 | Gene Pldc2 AU022916, AlE plexin domain containing 2                              | NM_026162.5      |
| 22 | Gene A930004 AU022051, A9 RIKEN cDNA A930004D18 gene                             | NR_028376.1, NR_ |
| 22 | Gene Gm1776 Gm17762 predicted gene, 17762                                        | NR_028378.1      |
| 19 | Gene Skida1 2810030E01Ri SKI/DACH domain containing 1                            | NM_028317.2      |
| 26 | Gene Mllt10 B130021D15Ri myeloid/lymphoid or mixed-lineage leukemia (trithc      | NM_001252560.1   |
| 26 | Gene LOC101055966 uncharacterized LOC101055966                                   | XM_003945326.1,  |
| 25 | Gene Dnajc1 Dnajl1, Dnajc1 DnaJ (Hsp40) homolog, subfamily C, member 1           | NM_001190817.1   |
| 21 | Gene Commd3 Bup, AW55081COMM domain containing 3                                 | NM_147778.3      |
| 26 | Gene Bmi1 Pcgf4, Bmi-1, Bmi1 polycomb ring finger oncogene                       | NM_007552.4      |
| 26 | Gene LOC101055977 uncharacterized LOC101055977                                   | XM_003945327.1   |
| 26 | Gene BC061195 BC061194                                                           | NM_001001334.2   |

|    |              |                 |                                                               |                 |
|----|--------------|-----------------|---------------------------------------------------------------|-----------------|
| 26 | Gene Gm3363  | Gm3363          | predicted gene 3363                                           | XM_003945325.1  |
| 29 | Gene Pip4k2a | AW742916,       | Pip phosphatidylinositol-5-phosphate 4-kinase, type II, alpha | NM_008845.4     |
| 29 | Gene 4930426 | 4930426L09Ril   | RIKEN cDNA 4930426L09 gene                                    | NR_024323.1     |
| 21 | Gene Gm3230  | Gm3230          | predicted gene 3230                                           | NR_033642.1     |
| 21 | Gene Otud1   | Otud1, 493342   | OTU domain containing 1                                       | NM_027715.1     |
| 28 | Gene Arhgap2 | Arhgap21, 553   | Rho GTPase activating protein 21                              | NM_001128084.2  |
| 28 | Gene Gm1337  | Gm13375,        | OTU predicted gene 13375                                      | NR_033225.1     |
| 27 | Gene Abi1    | E3B1, Ssh3bp1   | abl-interactor 1                                              | NM_001077190.1  |
| 26 | Gene Ehmt1   | D330003E03,     | euchromatic histone methyltransferase 1                       | NM_001109686.1  |
| 26 | Gene Arrdc1  | BC004091,       | Arr arrestin domain containing 1                              | NM_001162485.1  |
| 38 | Gene Zmynd1  | 2700064H14Ri    | zinc finger, MYND domain containing 19                        | NM_026021.3     |
| 32 | Gene Wdr85   | Wdr85, AW061    | WD repeat domain 85                                           | NM_026044.3     |
| 32 | Gene Mrpl41  | Mrpl41, Rpml2   | mitochondrial ribosomal protein L41                           | NM_001031808.2  |
| 32 | Gene Pnpla7  | MGC6929,        | Nre patatin-like phospholipase domain containing 7            | NM_146251.4     |
| 26 | Gene Nsmf    | Jacob, Nelf, Ns | NMDA receptor synaptonuclear signaling and neuro              | NM_001039387.1  |
| 36 | Gene Nrarp   | Nrarp, 270005   | Notch-regulated ankyrin repeat protein                        | NM_025980.2     |
| 29 | Gene Ndor1   | NR1, Ndor1,     | N NADPH dependent diflavin oxidoreductase 1                   | NM_001082476.2  |
| 29 | Gene Tmem20  | Hbebp1, Tmen    | transmembrane protein 203                                     | NM_177344.3     |
| 29 | Gene Tprn    | C87750,         | RP23- taperin                                                 | NM_175286.4     |
| 29 | Gene Ssna1   | NA14, Ssna1,    | Sjogren's syndrome nuclear autoantigen 1                      | NM_023464.2     |
| 29 | Gene Anapc2  | Imi4, Apc2, 92  | anaphase promoting complex subunit 2                          | NM_175300.4     |
| 28 | Gene Dpp7    | Dpp2, DPPII,    | D dipeptidylpeptidase 7                                       | NM_031843.2     |
| 43 | Gene Uap1l1  | Uap1l1, 57304   | UDP-N-acetylglucosamine pyrophosphorylase 1-like              | NM_001033293.2  |
| 43 | Gene Sapcd2  | AL033337, 603   | suppressor APC domain containing 2                            | NM_001081085.1  |
| 23 | Gene Entpd2  | Entpd2, Cd391   | ectonucleoside triphosphate diphosphohydrolase 2              | NM_009849.2     |
| 23 | Gene Npdc1   | NPDC-1, Npdc    | neural proliferation, differentiation and control 1           | NM_008721.3     |
| 23 | Gene Lcn12   | MGC130532,      | lipocalin 12                                                  | NM_029958.1     |
| 23 | Gene C8g     | 1700013L23Ril   | complement component 8, gamma polypeptide                     | NM_027062.1     |
| 23 | Gene Fbxw5   | AI159739,       | Fbw F-box and WD-40 domain protein 5                          | NM_013908.4     |
| 24 | Gene Traf2   | AI325259,       | Traf TNF receptor-associated factor 2                         | NM_009422.2     |
| 28 | Gene Edf1    | Edf1, 0610008   | endothelial differentiation-related factor 1                  | NM_021519.1     |
| 31 | Gene Mamdc4  | Mamdc4, Gm9     | MAM domain containing 4                                       | NM_001081199.1  |
| 31 | Gene Phpt1   | Phpt1, Php14,   | phosphohistidine phosphatase 1                                | NM_029293.2     |
| 31 | Gene Gm996   | Gm996, MGC6     | predicted gene 996                                            | NM_001005424.2  |
| 31 | Gene Rabl6   | Rbel1, parf,    | Rb RAB, member of RAS oncogene family-like 6                  | NM_001024616.1  |
| 31 | Gene 4921530 | 4921530D09Rik,  | Kiaa1984                                                      | NM_029859.1     |
| 21 | Gene Camsap1 | PRO2405, 9531   | calmodulin regulated spectrin-associated protein 1            | NM_001115076.1  |
| 19 | Gene C330006 | AI551216, C33   | RIKEN cDNA C330006A16 gene                                    | NM_001256521.1  |
| 39 | Gene Qsox2   | Qsox2, SOXN,    | quiescin Q6 sulfhydryl oxidase 2                              | NM_153559.2     |
| 39 | Gene C030048 | C030048H21Ri    | RIKEN cDNA C030048H21 gene                                    | XM_003945328.1  |
| 30 | Gene Gpsm1   | Gpsm1, 18100    | G-protein signalling modulator 1 (AGS3-like, C. elegans)      | NM_153410.5, NM |
| 29 | Gene Dnlz    | D2Bwg1335e,     | DNL-type zinc finger                                          | NM_026828.3, NM |
| 29 | Gene Card9   | Card9, Gm782    | caspase recruitment domain family, member 9                   | NM_001037747.1  |
| 29 | Gene Snapc4  | MGC59524,       | Sn small nuclear RNA activating complex, polypeptide 4        | NM_172339.4, NR |
| 24 | Gene Sdccag3 | C330016H24Ri    | serologically defined colon cancer antigen 3                  | NM_001085408.1  |
| 24 | Gene Pmpca   | P-55, 1200002   | peptidase (mitochondrial processing) alpha                    | NM_173180.3     |
| 24 | Gene Inpp5e  | 72kDa, Inpp5e   | inositol polyphosphate-5-phosphatase E                        | NM_033134.2     |

|    |              |                                                                            |                  |
|----|--------------|----------------------------------------------------------------------------|------------------|
| 34 | Gene Sec16a  | Sec16a, MGC3 SEC16 homolog A ( <i>S. cerevisiae</i> )                      | NM_153125.2      |
| 34 | Gene 0610009 | 0610009E02Ri RIKEN cDNA 0610009E02 gene                                    | XR_140496.1, XR_ |
| 40 | Gene Notch1  | N1, lin-12, Tan1, 9930111A19Rik, Mis6, Notch1                              | NM_008714.3      |
| 33 | Gene Agpat2  | Agpat2, AV00C 1-acylglycerol-3-phosphate O-acyltransferase 2 ( <i>lysc</i> | NM_026212.1      |
| 25 | Gene Fam69b  | AW209000, AE family with sequence similarity 69, member B                  | NM_019833.3      |
| 25 | Gene Snhg7   | 2610002F03Ri small nucleolar RNA host gene (non-protein coding)            | NR_024068.2      |
| 25 | Gene Snora43 | ACA43, Snora4 small nucleolar RNA, H/ACA box 43                            | NR_028572.1      |
| 25 | Gene Snora17 | ACA17, Snora1 small nucleolar RNA, H/ACA box 17                            | NR_028571.1      |
| 25 | Gene 5730588 | 5730588L14Ri RIKEN cDNA 5730588L14 gene                                    | XR_104657.3, XR_ |
| 25 | Gene Gm2240  | Gm2240 predicted gene 2240                                                 | XM_001472904.2,  |
| 61 | Gene Surf6   | Surf6, Surf-6, I surfeit gene 6                                            | NM_009298.3      |
| 61 | Gene Med22   | AW212655, Su mediator complex subunit 22                                   | NM_011513.2, NM  |
| 61 | Gene Rpl7a   | Surf3, Rpl7a, N ribosomal protein L7A                                      | NM_013721.3      |
| 61 | Gene Surf1   | Surf-1, Surf1, C surfeit gene 1                                            | NM_013677.2      |
| 61 | Gene Surf2   | Surf2, Surf-2 surfeit gene 2                                               | NM_013678.2      |
| 61 | Gene Surf4   | AL033340, ALC surfeit gene 4                                               | NM_011512.3      |
| 23 | Gene Gm711   | Sgk071, Gm71 predicted gene 711                                            | NM_198628.2      |
| 24 | Gene Adams1  | Gm710, Adam a disintegrin-like and metallopeptidase (reprolysin t          | NM_001001322.2   |
| 24 | Gene Cacfd1  | 5930434B04Ri calcium channel flower domain containing 1                    | NM_001243239.1   |
| 39 | Gene Vav2    | 2810040F13Ri vav 2 oncogene                                                | NM_009500.1      |
| 33 | Gene Brd3    | RINGL3, 2410C bromodomain containing 3                                     | NM_001113573.1   |
| 29 | Gene Wdr5    | AA960360, 24: WD repeat domain 5                                           | NM_080848.2      |
| 28 | Gene Rxra    | RXRalpha1, Rx retinoid X receptor alpha                                    | NM_011305.3      |
| 26 | Gene Col5a1  | Col5a1, AI4135 collagen, type V, alpha 1                                   | NM_015734.2      |
| 25 | Gene 1700007 | 1700007K13Ri RIKEN cDNA 1700007K13 gene                                    | NM_027040.1      |
| 25 | Gene Mrps2   | Mrps2, 15000: mitochondrial ribosomal protein S2                           | NM_080452.3, NM  |
| 22 | Gene Gbgt1   | Fs, Gbgt1, MG globoside alpha-1,3-N-acetylgalactosaminyltransfer:          | NM_139197.2      |
| 22 | Gene Ralgds  | Rgds, mKIAA13: ral guanine nucleotide dissociation stimulator              | NM_009058.2, NM  |
| 18 | Gene Tsc1    | mKIAA0243, T: tuberous sclerosis 1                                         | NM_022887.3      |
| 42 | Gene Gtf3c4  | AI426938, Gtf: general transcription factor IIIC, polypeptide 4            | NM_172977.3, NM  |
| 42 | Gene Ddx31   | 5830444G11Ri DEAD/H (Asp-Glu-Ala-Asp/His) box polypeptide 31               | NM_001033294.3   |
| 22 | Gene Barhl1  | MBH2, Dres11 BarH-like 1 ( <i>Drosophila</i> )                             | NM_019446.4, NM  |
| 22 | Gene 1700101 | Gm823, 17001 RIKEN cDNA 1700101E01 gene                                    | NM_001085514.2,  |
| 22 | Gene Ttf1    | Ttf1, AV24572: transcription termination factor, RNA polymerase I          | NM_009442.2      |
| 17 | Gene Ntng2   | Lmnt2, Ntng2, netrin G2                                                    | NM_133500.1, NM  |
| 17 | Gene 6530402 | mKIAA1857, 6: RIKEN cDNA 6530402F18 gene                                   | NR_029460.1      |
| 21 | Gene Med27   | D2Erd434e, C mediator complex subunit 27                                   | NM_026896.4      |
| 19 | Gene 2600006 | 2600006K01Ri RIKEN cDNA 2600006K01 gene                                    | XR_107356.1, XR_ |
| 39 | Gene Cercam  | AL024097, Cer cerebral endothelial cell adhesion molecule                  | NM_207298.2      |
| 39 | Gene Odf2    | MMTEST29, AI outer dense fiber of sperm tails 2                            | NM_013615.3, NM  |
| 34 | Gene Gle1    | 4933405K21Ri GLE1 RNA export mediator (yeast)                              | NM_028923.3      |
| 31 | Gene Sptan1  | Spna2, Spna-2, spectrin alpha, non-erythrocytic 1                          | NM_001076554.2   |
| 37 | Gene Wdr34   | Wdr34, MGC1: WD repeat domain 34                                           | NM_001008498.2   |
| 30 | Gene Set     | 2610030F17Ri SET nuclear oncogene                                          | NM_023871.4, NM  |
| 30 | Gene Pkn3    | BC034126, AW protein kinase N3                                             | NM_153805.1      |
| 27 | Gene 1700084 | 1700084E18Ri RIKEN cDNA 1700084E18 gene                                    | NR_028299.1      |
| 27 | Gene Lrrc8a  | MGC61242, Lr leucine rich repeat containing 8A                             | NM_177725.4      |

|    |                   |                                                                       |                 |
|----|-------------------|-----------------------------------------------------------------------|-----------------|
| 30 | Gene Phyh1        | Phyh1, MGC4phytanoyl-CoA dioxygenase domain containing 1              | NM_001252568.1  |
| 30 | Gene Dolk         | BC026973, Tm dolichol kinase                                          | NM_177648.3     |
| 30 | Gene Nup188       | mKIAA0169, B nucleoporin 188                                          | NM_198304.2     |
| 30 | Gene Crat         | AW107812, Cr carnitine acetyltransferase                              | NM_007760.3     |
| 30 | Gene Ppp2r4       | PR53, MGC712 protein phosphatase 2A, regulatory subunit B (PR 53      | NM_138748.5     |
| 46 | Gene Ier5l        | 2610524G09Ri immediate early response 5-like                          | NM_030244.3     |
| 24 | Gene Gm1448       | Gm14486, OT predicted gene 14486                                      | XM_991478.2, XM |
| 21 | Gene Gm1448       | Gm14488, OT predicted gene 14488                                      | XR_140500.1     |
| 21 | Gene Mir3089      | mmu-mir-3089 microRNA 3089                                            | NR_037272.1     |
| 19 | Gene LOC101055740 | uncharacterized LOC101055740                                          | XM_003945332.1, |
| 28 | Gene Tor1b        | DQ1, Tor1b, t torsin family 1, member B                               | NM_133673.3     |
| 28 | Gene Tor1a        | Dyt1, torsinA, t torsin family 1, member A (torsin A)                 | NM_144884.2     |
| 28 | Gene BC00562      | BC005624, RP cDNA sequence BC005624                                   | NM_144885.2     |
| 29 | Gene Fnbp1        | Fnbp1, 221001 formin binding protein 1                                | NM_001038700.2  |
| 29 | Gene D33002       | D330023K18Ri RIKEN cDNA D330023K18 gene                               | NR_040334.1     |
| 29 | Gene Gpr107       | mKIAA1624, A G protein-coupled receptor 107                           | NM_178760.4     |
| 25 | Gene Ncs1         | NCS-1, AI8366 neuronal calcium sensor 1                               | NM_019681.3     |
| 20 | Gene Hmcn2        | Hmcn2, D0300 hemicentin 2                                             | XM_003084486.2, |
| 20 | Gene Ass1         | Ass1, MGC103 argininosuccinate synthetase 1                           | NM_007494.3     |
| 22 | Gene Fubp3        | FBP3, A330051 far upstream element (FUSE) binding protein 3           | NM_001033389.3  |
| 21 | Gene Exosc2       | Exosc2, Rrp4, l exosome component 2                                   | NM_144886.2     |
| 21 | Gene Abl1         | c-Abl, MGC117 c-abl oncogene 1, non-receptor tyrosine kinase          | NM_009594.3, NM |
| 23 | Gene Fam78a       | A130092J06Ri family with sequence similarity 78, member A             | NM_175511.4     |
| 25 | Gene Prcc2b       | Bat2l1, Bat2l, l proline-rich coiled-coil 2B                          | NM_172661.3, NM |
| 30 | Gene Dnm1         | KIAA4093, mKl dynamin 1                                               | NM_010065.2     |
| 30 | Gene Ciz1         | LSFR1, 290005 CDKN1A interacting zinc finger protein 1                | NM_001252534.1, |
| 26 | Gene 1110008      | C79326, 11100 RIKEN cDNA 1110008P14 gene                              | NM_198001.2     |
| 26 | Gene Lcn2         | Lcn2, AW2122 lipocalin 2                                              | NM_008491.1     |
| 32 | Gene Fam102       | Eeig1, AI42646 family with sequence similarity 102, member A          | NM_153560.4     |
| 22 | Gene St6galna     | Siat7d, MGC10 ST6 (alpha-N-acetyl-neuraminy-2,3-beta-galactosyl-      | NM_011373.2     |
| 22 | Gene St6galna     | Siat7f, St6galn: ST6 (alpha-N-acetyl-neuraminy-2,3-beta-galactosyl-   | NM_001025311.1  |
| 17 | Gene Eng          | CD105, AI5286 endoglin                                                | NM_007932.2, NM |
| 20 | Gene Fpgs         | Fpgs, AA40818 folylpolyglutamyl synthetase                            | NM_010236.2     |
| 30 | Gene Cdk9         | PITALRE, Cdk9 cyclin-dependent kinase 9 (CDC2-related kinase)         | NM_130860.3     |
| 30 | Gene Mir2861      | Mir2861, mmu microRNA 2861                                            | NR_037217.1     |
| 30 | Gene Mir3960      | Mir3960, mmu microRNA 3960                                            | NR_039536.1     |
| 30 | Gene Sh2d3c       | Chat, Shep1, N SH2 domain containing 3C                               | NM_001252547.1  |
| 27 | Gene Tor2a        | Tor2a, Prosalu torsin family 2, member A                              | NM_152800.3, NR |
| 27 | Gene Ttc16        | Ttc16, 120000: tetratricopeptide repeat domain 16                     | NM_177384.2     |
| 21 | Gene Stxbp1       | Sxtbp1, Unc18 syntaxin binding protein 1                              | NM_009295.2, NM |
| 33 | Gene Fam129       | 9130404D14Ri family with sequence similarity 129, member B            | NM_146119.2     |
| 50 | Gene Lrsam1       | Lrsam1, MGC5 leucine rich repeat and sterile alpha motif containin    | NM_199302.2     |
| 50 | Gene Rpl12        | MGC102182, R ribosomal protein L12                                    | NM_009076.3     |
| 50 | Gene Snora65      | Snora65, MBII- small nucleolar RNA, H/ACA box 65                      | NR_002898.2     |
| 50 | Gene Slc2a8       | GLUT8, GlutX1 solute carrier family 2, (facilitated glucose transport | NM_019488.4     |
| 29 | Gene Garnl3       | Garnl3, AW120 GTPase activating RANGAP domain-like 3                  | NM_178888.4     |
| 23 | Gene Zbtb34       | Zbtb34, mKIAA zinc finger and BTB domain containing 34                | NM_001085507.1  |

|    |              |                                                                   |                  |
|----|--------------|-------------------------------------------------------------------|------------------|
| 28 | Gene Zbtb43  | Zbtb43, 17000 zinc finger and BTB domain containing 43            | NM_001025594.1   |
| 30 | Gene Mvb12b  | Fam125b, Mvb12b, 2610200014Rik, 2610528K11Rik, AI414895           | NM_175184.4      |
| 32 | Gene Pbx3    | Pbx3 pre B cell leukemia homeobox 3                               | NM_016768.1      |
| 26 | Gene Fbxw2   | Fwd2, MD6, 27F-box and WD-40 domain protein 2                     | NM_013890.4, NM  |
| 33 | Gene Psmd5   | KIAA0072, AW proteasome (prosome, macropain) 26S subunit, non     | NM_080554.2      |
| 33 | Gene D730039 | D730039F16Rik                                                     | NM_030021.2      |
| 35 | Gene Rab14   | D030017L14Ri RAB14, member RAS oncogene family                    | NM_026697.3      |
| 26 | Gene Dab2ip  | 2310011D08Ri disabled 2 interacting protein                       | NM_001001602.2   |
| 25 | Gene Ttl11   | D2Ert624e, T tubulin tyrosine ligase-like family, member 11       | NM_029774.1, NM  |
| 27 | Gene Ndufa8  | 0610033L03Ri NADH dehydrogenase (ubiquinone) 1 alpha subcom       | NM_026703.2      |
| 27 | Gene Morn5   | 1700010A17Ri MORN repeat containing 5                             | NM_029309.2      |
| 24 | Gene Rc3h2   | Rc3h2, 943001 ring finger and CCCH-type zinc finger domains 2     | NM_001100591.1   |
| 24 | Gene Zbtb6   | A830092L04Ri zinc finger and BTB domain containing 6              | NM_146253.5      |
| 24 | Gene Zbtb26  | A630026F21Ri zinc finger and BTB domain containing 26             | NM_199025.2      |
| 17 | Gene Rabgap1 | mKIAA4104, N RAB GTPase activating protein 1                      | NM_146121.2, NM  |
| 24 | Gene Dennd1a | 6030446I19Rik DENN/MADD domain containing 1A                      | NM_146122.3      |
| 20 | Gene Nek6    | Nek6, 1300007NIMA (never in mitosis gene a)-related expressed ki  | NM_021606.3, NM  |
| 39 | Gene Nr5a1   | MGC124278, F nuclear receptor subfamily 5, group A, member 1      | NM_139051.3      |
| 26 | Gene Nr6a1   | Nr6a1, NCNF, I nuclear receptor subfamily 6, group A, member 1    | NM_010264.4, NM  |
| 26 | Gene Olfml2a | mFLJ00237, OI olfactomedin-like 2A                                | NM_172854.2      |
| 32 | Gene Wdr38   | Wdr38, 17001.WD repeat domain 38                                  | NM_029687.3      |
| 32 | Gene Rpl35   | Rpl35, 241003 ribosomal protein L35                               | NM_025592.3      |
| 32 | Gene Arpc5l  | 2010015J01Ri actin related protein 2/3 complex, subunit 5-like    | NM_028809.1      |
| 40 | Gene Golga1  | 0710001G09Ri golgi autoantigen, golgin subfamily a, 1             | NM_029793.1      |
| 40 | Gene Scai    | AI662729, Scai suppressor of cancer cell invasion                 | NM_178778.3      |
| 29 | Gene Ppp6c   | 2310003C10Ri protein phosphatase 6, catalytic subunit             | NM_024209.2      |
| 28 | Gene Acvr2a  | Actr1la, Acvr2, activin receptor IIA                              | NM_007396.4      |
| 26 | Gene Epc2    | D2Ert694e, E enhancer of polycomb homolog 2 (Drosophila)          | NM_172663.4      |
| 18 | Gene Kif5c   | NKHC, Khc, KIN kinesin family member 5C                           | NM_008449.2      |
| 18 | Gene Lypd6   | Lypd6, E13011 LY6/PLAUR domain containing 6                       | NM_177139.5, NR  |
| 23 | Gene Mmadhc  | 2010311D03Ri methylmalonic aciduria (cobalamin deficiency) cbID   | NM_133839.2      |
| 23 | Gene Gm1348  | Gm13483, OT1 predicted gene 13483                                 | NR_040361.1, NR_ |
| 29 | Gene Rnd3    | Arhe, 2610017 Rho family GTPase 3                                 | NM_028810.2      |
| 23 | Gene Rif1    | 5730435J01Ri Rap1 interacting factor 1 homolog (yeast)            | NM_175238.5      |
| 32 | Gene Arl5a   | Arl5a, 2410015 ADP-ribosylation factor-like 5A                    | NM_182994.2      |
| 32 | Gene A430018 | A430018G15R RIKEN cDNA A430018G15 gene                            | XR_168390.1, XR_ |
| 32 | Gene Cacnb4  | MGC31529, I calcium channel, voltage-dependent, beta 4 subunit    | NM_001037099.1   |
| 31 | Gene Stam2   | Stam2, 12000C signal transducing adaptor molecule (SH3 domain ar  | NM_019667.2      |
| 34 | Gene Fmnl2   | 5430425K04Ri formin-like 2                                        | NM_172409.2      |
| 24 | Gene Prpf40a | FBP11, Prpf40: PRP40 pre-mRNA processing factor 40 homolog A (y   | NM_018785.2      |
| 24 | Gene Arl6ip6 | 2310057C01Ri ADP-ribosylation factor-like 6 interacting protein 6 | NM_022989.4      |
| 26 | Gene Nr4a2   | TINOR, Nr4a2, nuclear receptor subfamily 4, group A, member 2     | NM_013613.2, NM  |
| 23 | Gene BB55794 | BB557941 expressed sequence BB557941                              | NR_040356.1      |
| 26 | Gene A930012 | A930012O16R RIKEN cDNA A930012O16 gene                            | XR_107388.3, XR_ |
| 26 | Gene Gpd2    | Gpd-m, TISP38 glycerol phosphate dehydrogenase 2, mitochondrial   | NM_010274.3, NM  |
| 19 | Gene Acvr1c  | ALK7, Acvr1c, (activin A receptor, type IC                        | NM_001033369.3   |
| 28 | Gene Acvr1   | D330013D15R activin A receptor, type 1                            | NM_007394.3, NM  |

|    |                   |                                                                    |                  |
|----|-------------------|--------------------------------------------------------------------|------------------|
| 46 | Gene Pkp4         | MGC100358, F plakophilin 4                                         | NM_175464.2, NM  |
| 24 | Gene Tanc1        | mKIAA1728, 1: tetratricopeptide repeat, ankyrin repeat and coiled- | NM_198294.2      |
| 25 | Gene Wdsub1       | 2610014F08Ri  WD repeat, SAM and U-box domain containing 1         | NM_028118.2, NM  |
| 17 | Gene Baz2b        | D2Erd794e, B bromodomain adjacent to zinc finger domain, 2B        | NM_001001182.3   |
| 26 | Gene LOC100505179 | uncharacterized LOC100505179                                       | XR_107405.1, XR_ |
| 26 | Gene March7       | Axo, Gtrge017 membrane-associated ring finger (C3HC4) 7            | NM_020575.2      |
| 20 | Gene Rbms1        | MSSP-1, MSSP RNA binding motif, single stranded interacting prote  | NM_020296.2, NM  |
| 18 | Gene Gm1358       | OTTMUSG000  predicted gene 13582                                   | NR_045335.1      |
| 19 | Gene Tank         | Tank, E430026 TRAF family member-associated Nf-kappa B activatc    | NM_011529.2, NM  |
| 21 | Gene Psm14        | 3200001M20R  proteasome (prosome, macropain) 26S subunit, non      | NM_021526.2      |
| 21 | Gene Tbr1         | Tbr1                                                               | NM_009322.3      |
| 29 | Gene Cobll1       | Cobll1, 181004  Cobl-like 1                                        | NM_177025.5, NM  |
| 17 | Gene Galnt3       | Galnt3 UDP-N-acetyl-alpha-D-galactosamine:polypeptide N            | NM_015736.2      |
| 26 | Gene Stk39        | Stk39, RF005, SPAK, AW227544, AW556857, DCHT, Rnl5                 | NM_016866.2      |
| 33 | Gene Cers6        | Cers6, AW544719, 4732462C07Rik, Lass6, T1L, CerS6                  | NM_172856.3      |
| 22 | Gene Lrp2         | D230004K18Ri  low density lipoprotein receptor-related protein 2   | NM_001081088.1   |
| 30 | Gene Bbs5         | 1700049I01Rik  Bardet-Biedl syndrome 5 (human)                     | NM_028284.2      |
| 25 | Gene Fastkd1      | 5330408N05Ri  FAST kinase domains 1                                | NM_177244.3      |
| 25 | Gene Ppig         | B230312B02Ri  peptidyl-prolyl isomerase G (cyclophilin G)          | NM_001081086.1   |
| 18 | Gene Phospho      | AU021728, Ph  phosphatase, orphan 2                                | NM_028521.2      |
| 21 | Gene Ssb          | SS-B, MGC118  Sjogren syndrome antigen B                           | NM_009278.4, NM  |
| 21 | Gene Mettl5       | 2810410A08Ri  methyltransferase like 5                             | NM_029280.3      |
| 38 | Gene 493055C      | 4930550G17Ri  RIKEN cDNA 4930550G17 gene                           | XR_168391.1, XR_ |
| 38 | Gene Ubr3         | AA422631, AU ubiquitin protein ligase E3 component n-recogin 3     | NM_177783.5, NM  |
| 31 | Gene Gorasp2      | 2410043M02R  golgi reassembly stacking protein 2                   | NM_027352.4, NR  |
| 18 | Gene Tlk1         | Tlk1, 4930545  tousled-like kinase 1                               | NM_172664.3      |
| 25 | Gene Mettl8       | MGC67805, M methyltransferase like 8                               | NM_145524.3, NM  |
| 25 | Gene Dcaf17       | 2810055O12Ri  DDB1 and CUL4 associated factor 17                   | NM_198005.2, NM  |
| 31 | Gene Dync1i2      | Dncic2, Dync1i  dynein cytoplasmic 1 intermediate chain 2          | NM_010064.4, NM  |
| 25 | Gene Hat1         | Hat1, 2410071  histone aminotransferase 1                          | NM_026115.4      |
| 26 | Gene Metap1c      | 3110033D18Ri  methionyl aminopeptidase type 1D (mitochondrial)     | NM_025633.3      |
| 19 | Gene Itga6        | Itga6, 5033401  integrin alpha 6                                   | NM_008397.3      |
| 31 | Gene Pdk1         | D530020C15Ri  pyruvate dehydrogenase kinase, isoenzyme 1           | NM_172665.4      |
| 21 | Gene B23012C      | MLTK, MLTKa  RIKEN cDNA B230120H23 gene                            | NM_001164791.1   |
| 28 | Gene Cdca7        | Cdca7, JPO1, 2 cell division cycle associated 7                    | NM_025866.3      |
| 31 | Gene Sp3          | D130027J01Ri  trans-acting transcription factor 3                  | NM_001018042.3   |
| 31 | Gene 1700011      | 1700011J10Ri  RIKEN cDNA 1700011J10 gene                           | NR_045269.2      |
| 24 | Gene Ola1         | 2810405J23Ri  Olg-like ATPase 1                                    | NM_025942.2, NM  |
| 19 | Gene Sp9          | Sp9                                                                | NM_001005343.2   |
| 19 | Gene Cir1         | Cir1, Cicr, Cir,   corepressor interacting with RBPJ, 1            | NM_025854.3, XM  |
| 21 | Gene Chn1         | 1700112L09Ri  chimerin (chimaerin) 1                               | NM_029716.3, NM  |
| 27 | Gene Gm1082       | Gm10822, ENS  predicted gene 10822                                 | XR_140550.1, XR_ |
| 27 | Gene Atp5g3       | MGC124584,   ATP synthase, H+ transporting, mitochondrial FO cor   | NM_175015.2      |
| 34 | Gene Lnp          | 2310011O18Ri  limb and neural patterns                             | NM_027133.3, NM  |
| 21 | Gene Evx2         | Evx2, Evx-2 even skipped homeotic gene 2 homolog                   | NM_007967.2      |
| 21 | Gene Hoxd13       | Hox-4.8, Hoxd: homeobox D13                                        | NM_008275.3      |
| 21 | Gene Hoxd12       | Hox-4.7, Hoxd: homeobox D12                                        | NM_008274.3      |



|    |                   |                                                                      |                  |
|----|-------------------|----------------------------------------------------------------------|------------------|
| 21 | Gene Hoxd11       | Hox-5.5, Hox-5 homeobox D11                                          | NR_073086.1, NM  |
| 36 | Gene Hoxd10       | AI385591, AI8 homeobox D10                                           | NM_013554.5      |
| 36 | Gene Hoxd9        | Hox-4.4, Hox-5 homeobox D9                                           | NM_013555.4      |
| 36 | Gene Hoxd8        | Hox-5.4, Hoxd homeobox D8                                            | NM_008276.2      |
| 17 | Gene 1700109      | 1700109F18Ri RIKEN cDNA 1700109F18 gene                              | NR_027899.1      |
| 19 | Gene Hoxd3        | Hox-5.5, Hox-4 homeobox D3                                           | NM_010468.2      |
| 17 | Gene Hoxd4        | Hox-4.2, Hoxd homeobox D4                                            | NM_010469.2      |
| 17 | Gene Mir10b       | Mirn10b, mmu microRNA 10b                                            | NR_029566.1      |
| 19 | Gene 6720416      | 6720416L17Ri RIKEN cDNA 6720416L17 gene                              | XR_104751.2, XR_ |
| 23 | Gene Hoxd1        | Hox-4.9, Hoxd homeobox D1                                            | NM_010467.2      |
| 31 | Gene Mtx2         | 1500012G02Ri metaxin 2                                               | NM_016804.4      |
| 24 | Gene Hnrnpa3      | Hnrnpa3, 241C heterogeneous nuclear ribonucleoprotein A3             | NM_198090.2, NM  |
| 35 | Gene Nfe2l2       | AI194320, Nfe nuclear factor, erythroid derived 2, like 2            | NM_010902.3      |
| 35 | Gene E030042      | E030042O20Ri RIKEN cDNA E030042O20 gene                              | XR_107435.1, XR_ |
| 24 | Gene Cyct         | T-Cc, Cyct cytochrome c, testis                                      | NM_009989.2      |
| 24 | Gene Rbm45        | Rbm45, Drb1, RNA binding motif protein 45                            | NM_153405.2      |
| 24 | Gene Osbp16       | ORP-6, AI5964 oxysterol binding protein-like 6                       | NM_145525.2      |
| 44 | Gene Ssfa2        | 5730488C15Ri sperm specific antigen 2                                | NM_080558.4      |
| 29 | Gene Dnajc10      | D2ErtD706e, D DnaJ (Hsp40) homolog, subfamily C, member 10           | NM_024181.2      |
| 20 | Gene Nckap1       | Nckap1, C793C NCK-associated protein 1                               | NM_016965.2      |
| 27 | Gene Dusp19       | C79103, Dusp1 dual specificity phosphatase 19                        | NM_024438.4      |
| 27 | Gene Gm1369       | OTTMUSG000I SMT3 suppressor of mif two 3 homolog 2 pseudogene        |                  |
| 27 | Gene Mir684       | Mirn684-1, Mi microRNA 684-1                                         | NR_030454.1      |
| 27 | Gene Nup35        | MP44, NO44, I nucleoporin 35                                         | NM_001190179.1   |
| 31 | Gene Zc3h15       | 2610312B22Ri zinc finger CCCH-type containing 15                     | NM_026934.3      |
| 16 | Gene Itgav        | Itgav, D43004C integrin alpha V                                      | NM_008402.2      |
| 19 | Gene Zdhhc5       | AI451382, 111 zinc finger, DHHC domain containing 5                  | NM_144887.4      |
| 19 | Gene Clp1         | Clp1, Heab, AI CLP1, cleavage and polyadenylation factor I subunit   | NM_133840.2      |
| 29 | Gene Ypel4        | Ypel4 yippee-like 4 (Drosophila)                                     | NM_001005342.2   |
| 29 | Gene Mir130a      | Mir130a, Mirn microRNA 130a                                          | NR_029544.1      |
| 29 | Gene Gm1942       | Gm19426 predicted gene, 19426                                        | XR_107441.1, XR_ |
| 20 | Gene Timm10       | Timm13a, Tim translocase of inner mitochondrial membrane 10          | NM_013899.2      |
| 20 | Gene Slc43a1      | Lat3, PB39, 26 solute carrier family 43, member 1                    | NM_001083809.1,  |
| 20 | Gene Rtn4rl2      | Ngr13, Ngr2, Nr reticulon 4 receptor-like 2                          | NM_199223.1      |
| 17 | Gene P2rx3        | MGC28163, P2 purinergic receptor P2X, ligand-gated ion channel, 3    | NM_145526.2      |
| 17 | Gene LOC100862344 | uncharacterized LOC100862344                                         | XR_140553.1, XR_ |
| 18 | Gene Ssrp1        | C81323, Hmg1 structure specific recognition protein 1                | NM_182990.3, NM  |
| 18 | Gene Tnks1bp      | Tab182, mKIA tankyrase 1 binding protein 1                           | NM_001081260.2   |
| 26 | Gene C1qtnf4      | C1qtnf4, CTRP, C1q and tumor necrosis factor related protein 4       | NM_026161.3      |
| 29 | Gene Ndufs3       | 0610010M09R NADH dehydrogenase (ubiquinone) Fe-S protein 3           | NM_026688.2      |
| 29 | Gene Kbtbd4       | Kbtbd4, 25100 kelch repeat and BTB (POZ) domain containing 4         | NM_025991.3      |
| 29 | Gene Ptpmt1       | 1110001D10Ri protein tyrosine phosphatase, mitochondrial 1           | NM_025576.2      |
| 27 | Gene Celf1        | NAB50, CUGBF CUGBP, Elav-like family member 1                        | NM_001244891.1   |
| 22 | Gene Slc39a13     | Slc39a13, ZIP1 solute carrier family 39 (metal ion transporter), men | NM_026721.2      |
| 23 | Gene Madd         | Madd, 963005 MAP-kinase activating death domain                      | NM_001177719.1   |
| 23 | Gene Nr1h3        | Nr1h3, LXR, Ur nuclear receptor subfamily 1, group H, member 3       | NM_001177730.1,  |
| 24 | Gene Lrp4         | D230026E03, r low density lipoprotein receptor-related protein 4     | NM_172668.3, NM  |

|    |               |                                                                    |                  |
|----|---------------|--------------------------------------------------------------------|------------------|
| 20 | Gene Gm1377   | Gm13770, OTI predicted gene 13770                                  | XM_884324.2, XM  |
| 18 | Gene Atg13    | D2ErtD391e, H autophagy related 13                                 | NM_145528.3      |
| 19 | Gene Harbi1   | Harbi1, D2300 harbinger transposase derived 1                      | NM_178724.4      |
| 19 | Gene Ambra1   | Ambra1, AV02 autophagy/beclin 1 regulator 1                        | NM_001080754.1,  |
| 25 | Gene Chrm4    | M4, Chrm4, Cf cholinergic receptor, muscarinic 4                   | NM_007699.2      |
| 25 | Gene Mdk      | Mdk, MK, Mek midkine                                               | NM_001012336.1   |
| 25 | Gene Dgkz     | E130307B02Ri diacylglycerol kinase zeta                            | NM_138306.2, NM  |
| 17 | Gene Creb3l1  | Creb3l1, Oasis, cAMP responsive element binding protein 3-like 1   | NM_011957.2      |
| 25 | Gene Phf21a   | D030065N23R PHD finger protein 21A                                 | NM_138755.2, NM  |
| 25 | Gene Gylt1b   | Largel, Gylt1b glycosyltransferase-like 1B                         | NM_172670.2, NM  |
| 25 | Gene Pex16    | Pex16                                                              | NM_145122.2, NR  |
| 45 | Gene Cry2     | AV006279, Cry cryptochrome 2 (photolyase-like)                     | NM_009963.4, NM  |
| 45 | Gene D930015  | D930015M05F RIKEN cDNA D930015M05 gene                             | NR_040621.1      |
| 37 | Gene Slc35c1  | fuct1, E430007 solute carrier family 35, member C1                 | NM_211358.2, NM  |
| 25 | Gene Trp53i11 | Trp53i11, Tp53 transformation related protein 53 inducible protein | NM_001025246.1   |
| 29 | Gene Tspan18  | Tspan18, 2610 tetraspanin 18                                       | NM_183180.2      |
| 26 | Gene Gm1388   | OTTMUSG000I predicted gene 13889                                   | NM_001145034.1   |
| 22 | Gene Ttc17    | D2Bwg1005e, tetratricopeptide repeat domain 17                     | NM_183106.2      |
| 22 | Gene 2810002  | 2810002D19Ri RIKEN cDNA 2810002D19 gene                            | NR_027831.1      |
| 30 | Gene Api5     | Api5, AI19645: apoptosis inhibitor 5                               | NM_007466.2      |
| 25 | Gene Traf6    | C630032O20Ri TNF receptor-associated factor 6                      | NM_009424.2      |
| 37 | Gene Trim44   | MGC102054, M tripartite motif-containing 44                        | NM_020267.2      |
| 38 | Gene Fjx1     | Fjx1 four jointed box 1 (Drosophila)                               | NM_010218.2      |
| 32 | Gene Abtb2    | Abtb2, AW539 ankyrin repeat and BTB (POZ) domain containing 2      | NM_178890.3      |
| 27 | Gene Nat10    | MGC25461, N: N-acetyltransferase 10                                | NM_153126.2      |
| 44 | Gene Caprin1  | P137, Caprin1, cell cycle associated protein 1                     | NM_016739.3, NM  |
| 44 | Gene 4930547  | 4930547E08Ri RIKEN cDNA 4930547E08 gene                            | NR_040514.1      |
| 17 | Gene D430041  | 9630056G07Ri RIKEN cDNA D430041D05 gene                            | NM_001033347.2   |
| 34 | Gene Hipk3    | FIST3, DYRK6, homeodomain interacting protein kinase 3             | NM_010434.2, NM  |
| 18 | Gene Cstf3    | CstF-77, C7953 cleavage stimulation factor, 3' pre-RNA, subunit 3  | NM_177253.4, NM  |
| 20 | Gene Qser1    | AI502974, Qse glutamine and serine rich 1                          | NM_001123327.1   |
| 20 | Gene 2310047  | AV090227, 23: RIKEN cDNA 2310047K21 gene                           | XM_003945352.1,  |
| 28 | Gene Eif3m    | MGC118449, Eukaryotic translation initiation factor 3, subunit M   | NM_145380.2      |
| 40 | Gene AI31483  | 6030498F17, A expressed sequence AI314831                          | NR_015462.1      |
| 40 | Gene Wt1      | D630046I19Ri Wilms tumor 1 homolog                                 | NM_144783.2      |
| 24 | Gene Rcn1     | Rcn, Rcn1 reticulocalbin 1                                         | NM_009037.2      |
| 17 | Gene Bdnf     | Bdnf brain derived neurotrophic factor                             | NM_001048139.1   |
| 23 | Gene Gm1393   | Gm13939, OTI predicted gene 13939                                  | NR_033473.1      |
| 23 | Gene Lgr4     | Gpr48, A3301C leucine-rich repeat-containing G protein-coupled re  | NM_172671.2      |
| 29 | Gene Nutm1    | 4932438M10, NUT midline carcinoma, family member 1                 | NM_172521.1      |
| 29 | Gene Nop10    | Nola3, 111003 NOP10 ribonucleoprotein                              | NM_025403.3      |
| 29 | Gene Slc12a6  | KCC3, 9530023 solute carrier family 12, member 6                   | NM_133649.2, NM  |
| 29 | Gene E330013  | E330013P08Ri RIKEN cDNA E330013P08 gene                            | XR_168396.1, XR_ |
| 30 | Gene Katnbl1  | 2410042D21Ri katanin p80 subunit B like 1                          | NM_024254.3      |
| 20 | Gene Grem1    | Id, Drm, Grem: gremlin 1                                           | NM_011824.4      |
| 18 | Gene Meis2    | Stra10, A4301C Meis homeobox 2                                     | NM_010825.3, NM  |
| 18 | Gene 2700033  | 2700033N17Ri RIKEN cDNA 2700033N17 gene                            | XR_107390.1, XR_ |

|    |               |                                                                     |                  |
|----|---------------|---------------------------------------------------------------------|------------------|
| 18 | Gene Spred1   | AL024345, Spr sprouty protein with EVH-1 domain 1, related sequence | NM_033524.2      |
| 22 | Gene Fam98b   | 2610510H03Ri family with sequence similarity 98, member B           | NM_026620.3      |
| 27 | Gene Eif2ak4  | 2610011M03, eukaryotic translation initiation factor 2 alpha kinase | NM_001177806.1   |
| 24 | Gene Srp14    | AW536328, Srp signal recognition particle 14                        | NM_009273.4      |
| 34 | Gene Bub1b    | Bub1b, BUBR1 budding uninhibited by benzimidazoles 1 homolog, l     | NM_009773.3      |
| 28 | Gene Pak6     | Pak6, 4732456p21 protein (Cdc42/Rac)-activated kinase 6             | NM_001033254.3   |
| 28 | Gene Ankrd63  | Gm1337, Ankr ankyrin repeat domain 63                               | NM_001081971.1   |
| 28 | Gene Plcb2    | B230205M18R phospholipase C, beta 2                                 | NM_177568.2      |
| 22 | Gene 5430417  | 5430417L22Ri RIKEN cDNA 5430417L22 gene                             | NR_030716.1      |
| 25 | Gene A430105  | Gm353, A4301 RIKEN cDNA A430105I19 gene                             | NM_001001982.2   |
| 21 | Gene Bahd1    | Gm117, Bahd1 bromo adjacent homology domain containing 1            | NM_001045523.1   |
| 25 | Gene Ccdc32   | Ccdc32, MGC6 coiled-coil domain containing 32                       | NM_199310.2      |
| 33 | Gene Rpsd2    | BB231107, 96S RNA pseudouridylation synthase domain containing 2    | NM_173450.3      |
| 33 | Gene Casc5    | MGC91208, 23 cancer susceptibility candidate 5                      | NM_029617.2      |
| 30 | Gene Rad51    | Reca, Rad51, Rad51a, AV304093                                       | NM_011234.4      |
| 26 | Gene Rmdn3    | mRMD-3, Rmd regulator of microtubule dynamics 3                     | NM_001033136.3   |
| 18 | Gene Gchfr    | Gchfr, 201032: GTP cyclohydrolase I feedback regulator              | NM_177157.4      |
| 18 | Gene Dnajc17  | 1700025B16Ri DnaJ (Hsp40) homolog, subfamily C, member 17           | NM_139139.2      |
| 18 | Gene Gm1413   | Gm14137, OTI predicted gene 14137                                   | NM_001039223.3   |
| 22 | Gene Ppp1r14  | Ppp1r14, Ppp1 protein phosphatase 1, regulatory (inhibitor) subunit | NM_028104.3      |
| 22 | Gene Spint1   | Spint1, HAI-1 serine protease inhibitor, Kunitz type 1              | NM_016907.3      |
| 24 | Gene Gm1420   | OTTMUSG000I predicted gene 14207                                    | NR_030683.1      |
| 24 | Gene Dll4     | Delta4, Dll4 delta-like 4 (Drosophila)                              | NM_019454.3      |
| 31 | Gene Ino80    | Ino80, 463240 INO80 homolog (S. cerevisiae)                         | NM_026574.3      |
| 24 | Gene Chp1     | Sid470p, AA96 calcineurin-like EF hand protein 1                    | NM_019769.3      |
| 24 | Gene 1700020  | AI585852, AI4: RIKEN cDNA 1700020I14 gene                           | NR_015473.1, NR_ |
| 30 | Gene H3f3c    | H3f3c, OTTMUH3 histone, family 3C                                   | XM_889893.6      |
| 30 | Gene Rtf1     | AW553985, 29 Rtf1, Paf1/RNA polymerase II complex component, l      | NM_030112.2      |
| 22 | Gene Itpka    | Itpka, MGC285 inositol 1,4,5-trisphosphate 3-kinase A               | NM_146125.2      |
| 22 | Gene Ltk      | Ltk                                                                 | NM_008523.2, NM  |
| 27 | Gene Tyro3    | Tyro3, Dtk, Etk TYRO3 protein tyrosine kinase 3                     | NM_019392.2      |
| 37 | Gene 6330405  | 6330405D24Ri RIKEN cDNA 6330405D24 gene                             | XR_168398.1, XR_ |
| 27 | Gene Mga      | C80739, C130C MAX gene associated                                   | NM_013720.2, NM  |
| 26 | Gene Zfp106   | Znf106, Sh3bp zinc finger protein 106                               | NM_011743.2      |
| 26 | Gene Snap23   | Syndet, 23kDa synaptosomal-associated protein 23                    | NM_009222.3, NM  |
| 35 | Gene Cdan1    | AW492297, CD congenital dyserythropoietic anemia, type I (human     | NM_026891.2      |
| 35 | Gene Ttbk2    | Ttbk, KIAA084: tau tubulin kinase 2                                 | NM_001024856.2   |
| 31 | Gene AV03930  | AV039307 expressed sequence AV039307                                | NR_038349.1, NR_ |
| 31 | Gene Ubr1     | Ubr1, AI50473 ubiquitin protein ligase E3 component n-recogin 1     | NM_009461.2      |
| 31 | Gene Lcmt2    | Lcmt2, D33002 leucine carboxyl methyltransferase 2                  | NM_177846.3      |
| 31 | Gene Adal     | Adal, MGC624 adenosine deaminase-like                               | NM_029475.1      |
| 27 | Gene Zscan29  | Zscan29, AW1: zinc finger SCAN domains 29                           | NM_178889.4      |
| 27 | Gene Tubgcp4  | 76p, MGC2808 tubulin, gamma complex associated protein 4            | NM_153387.2      |
| 44 | Gene Catsper2 | Catsper2                                                            | NM_153075.3      |
| 44 | Gene Pdia3    | ERp61, Pdia3, protein disulfide isomerase associated 3              | NM_007952.2      |
| 32 | Gene Ell3     | MGC31450, Ell elongation factor RNA polymerase II-like 3            | NM_145973.2      |
| 32 | Gene Serf2    | Msmac1l, C80C small EDRK-rich factor 2                              | NM_011354.2      |

|    |               |                                                                        |                  |
|----|---------------|------------------------------------------------------------------------|------------------|
| 32 | Gene Serinc4  | Serinc4, RP23- serine incorporator 4                                   | NM_001025371.2   |
| 32 | Gene Hypk     | RP23-433P19.1 huntingtin interacting protein K                         | NM_026318.3      |
| 23 | Gene Casc4    | D130060C09Ri cancer susceptibility candidate 4                         | NM_177054.5, NM  |
| 20 | Gene Mageb3   | Mage-ps1, Ma melanoma antigen, family B, 3                             | NM_008545.2      |
| 20 | Gene Ctdspl2  | D2Ert485e, C CTD (carboxy-terminal domain, RNA polymerase II, p        | NM_212450.3      |
| 22 | Gene Eif3j1   | 1810016104Ri eukaryotic translation initiation factor 3, subunit J1    | NM_144545.3      |
| 29 | Gene Spg11    | Spg11, A33001 spastic paraplegia 11                                    | NM_145531.2      |
| 29 | Gene Patl2    | Pat1a, Patl2, 4 protein associated with topoisomerase II homolog 2     | NM_026251.2      |
| 28 | Gene Duox1    | LNOX2, Duox1 dual oxidase 1                                            | NM_001099297.1   |
| 28 | Gene Shf      | Shf                                                                    | NM_001013829.2   |
| 38 | Gene Spata5l1 | C130039A10Ri spermatogenesis associated 5-like 1                       | NM_001033256.2   |
| 38 | Gene AA46719  | MGC58382, Nr expressed sequence AA467197                               | NM_001004174.1   |
| 38 | Gene Mir147   | Mirn147, mmu microRNA 147                                              | NR_030547.1      |
| 23 | Gene Slc30a4  | Znt4, Slc30a4, solute carrier family 30 (zinc transporter), member 4   | NM_011774.2      |
| 19 | Gene Bloc1s6  | pa, Stx13bp1, l biogenesis of organelles complex-1, subunit 6, pallid  | NM_019788.3      |
| 25 | Gene Sema6d   | Sema6D-1, AA sema domain, transmembrane domain (TM), and cy            | NM_172537.3, NM  |
| 24 | Gene Dut      | D2Bwg0749e, deoxyuridine triphosphatase                                | NM_023595.6, NM  |
| 41 | Gene Fbn1     | AI536462, B43 fibrillin 1                                              | NM_007993.2      |
| 29 | Gene Secisbp2 | Secisbp2l, AI5 SECIS binding protein 2-like                            | NM_177608.3      |
| 25 | Gene Cops2    | Trip15, AI3157 COP9 (constitutive photomorphogenic) homolog, su        | NM_009939.2      |
| 25 | Gene Galk2    | Gk2, 2810017l galactokinase 2                                          | NM_175154.2      |
| 34 | Gene Fam227l  | Fam227b, 493l family with sequence similarity 227, member B            | NM_029455.2      |
| 34 | Gene Dtw1     | Dtw1, 18100:DTW domain containing 1                                    | NM_026981.2      |
| 25 | Gene Slc27a2  | Vlacc, Slc27a2, solute carrier family 27 (fatty acid transporter), men | NM_011978.2      |
| 35 | Gene Gabpb1   | GABPB1-1, GA GA repeat binding protein, beta 1                         | NM_010249.1, NM  |
| 31 | Gene Trpm7    | TRPPLIK, 2310l transient receptor potential cation channel, subfami    | NM_021450.2, NM  |
| 27 | Gene Snrnp20  | U5-200KD, U5- small nuclear ribonucleoprotein 200 (U5)                 | NM_177214.4      |
| 27 | Gene Ciao1    | Ciao1, Wdr39, cytosolic iron-sulfur protein assembly 1                 | NM_025296.4      |
| 34 | Gene Tmem127  | Tmem127, 231 transmembrane protein 127                                 | NM_175145.3      |
| 34 | Gene Gm1076   | Gm10766, ENS predicted gene 10766                                      | XM_003945353.1,  |
| 34 | Gene Stard7   | Stard7, AL022 START domain containing 7                                | NM_139308.2      |
| 21 | Gene Kcnip3   | AI413860, Kcn Kv channel interacting protein 3, calsenilin             | NM_019789.3, NM  |
| 30 | Gene Zfp661   | 2810405K07Ri zinc finger protein 661                                   | NM_028141.3, NM  |
| 30 | Gene Mrps5    | AI850294, Mrp mitochondrial ribosomal protein S5                       | NM_029963.2      |
| 29 | Gene Bub1     | C80208, D2Xrf budding uninhibited by benzimidazoles 1 homolog (        | NM_001113179.1   |
| 32 | Gene Acox1    | Acox1, AV0256 acyl-Coenzyme A oxidase-like                             | NM_028765.3      |
| 32 | Gene Bcl2l11  | Bcl2l11, Bod, 1 BCL2-like 11 (apoptosis facilitator)                   | NM_207680.2, NM  |
| 19 | Gene Anapc1   | 2610021O03Ri anaphase promoting complex subunit 1                      | NM_008569.2      |
| 25 | Gene Mertk    | Eyk, Mertk, Mlc-mer proto-oncogene tyrosine kinase                     | NM_008587.1, NM  |
| 28 | Gene Tmem87   | AU014804, Tm transmembrane protein 87B                                 | NM_028248.2      |
| 26 | Gene Zc3h8    | Zc3hdc8, Zc3h zinc finger CCCH type containing 8                       | NM_020594.2      |
| 20 | Gene Gm1402   | OTTMUSG000l predicted gene 14025                                       | XM_001004454.1,  |
| 34 | Gene Gm1402   | OTTMUSG000l predicted gene 14022                                       | XR_104719.3, XR_ |
| 34 | Gene Ttl      | AI848570, 270 tubulin tyrosine ligase                                  | NM_027192.2      |
| 26 | Gene Slc20a1  | Glvr-1, AI6078 solute carrier family 20, member 1                      | NM_015747.2, NM  |
| 21 | Gene Ckap2l   | 2610318C08Ri cytoskeleton associated protein 2-like                    | NM_181589.3      |
| 21 | Gene Gm1402   | OTTMUSG000l predicted gene 14023                                       | NR_040371.1      |

|    |              |                                           |                                                       |                 |
|----|--------------|-------------------------------------------|-------------------------------------------------------|-----------------|
| 21 | Gene Il1a    | Il-1a, Il1a                               | interleukin 1 alpha                                   | NM_010554.4     |
| 30 | Gene 4932416 | 4932416H05Ri                              | RIKEN cDNA 4932416H05 gene                            | NR_029452.1     |
| 30 | Gene Stk35   | Stk35, 170005                             | serine/threonine kinase 35                            | NM_001038635.2  |
| 44 | Gene Snrpb   | SM11, AU0188                              | small nuclear ribonucleoprotein B                     | NM_009225.2     |
| 33 | Gene Tmc2    | Tmc2, CWEA2                               | transmembrane channel-like gene family 2              | NM_138655.1     |
| 33 | Gene Nop56   | 2310044F10Ri                              | NOP56 ribonucleoprotein                               | NM_024193.2     |
| 33 | Gene Snord11 | Snord110, MBI                             | small nucleolar RNA, C/D box 110                      | NR_028547.1     |
| 33 | Gene Snord57 | Snord57, MBI                              | small nucleolar RNA, C/D box 57                       | NR_028528.1     |
| 33 | Gene Idh3b   | Idh3b, C78231                             | isocitrate dehydrogenase 3 (NAD+) beta                | NM_130884.4     |
| 24 | Gene Ebf4    | O/E-4, Ebf3, O                            | early B cell factor 4                                 | NM_001110513.1  |
| 31 | Gene Ptptra  | Ptptra, Ptpalph                           | protein tyrosine phosphatase, receptor type, A        | NM_008980.2, NM |
| 31 | Gene 4930473 | 4930473A02Ri                              | RIKEN cDNA 4930473A02 gene                            | NR_040348.1     |
| 31 | Gene Mrps26  | MRP-S26, MRF                              | mitochondrial ribosomal protein S26                   | NM_207207.1     |
| 22 | Gene Ubox5   | C330018L13Ri                              | U box domain containing 5                             | NM_001255993.1  |
| 22 | Gene Fastkd5 | MGC60835, C7                              | FAST kinase domains 5                                 | NM_198176.2, NM |
| 22 | Gene Lzts3   | Lzts3, Prosapif                           | leucine zipper, putative tumor suppressor family me   | NM_197945.3     |
| 19 | Gene Slc4a11 | NaBC1, BTR1, s                            | solute carrier family 4, sodium bicarbonate transpor  | NM_001081162.1  |
| 29 | Gene A730017 | A730017L22Ri                              | RIKEN cDNA A730017L22 gene                            | NR_015523.2     |
| 29 | Gene Atrn    | mg, AW55801                               | attractin                                             | NM_009730.2     |
| 24 | Gene Hspa12b | 2700081N06Ri                              | heat shock protein 12B                                | NM_028306.3     |
| 24 | Gene 1700037 | 1700037H04Rik                             |                                                       | NM_026091.2     |
| 44 | Gene Spef1   | 4931426K16Ri                              | sperm flagellar 1                                     | NM_027641.2     |
| 44 | Gene Cenpb   | Cenpb                                     |                                                       | NM_007682.2     |
| 44 | Gene Cdc25b  | AI604853, Cdc25b                          |                                                       | NM_001111075.4  |
| 21 | Gene Pank2   | 4933409I19Rik, Pank2, MGC118448, AI642621 |                                                       | NM_153501.2     |
| 22 | Gene Rnf24   | D2ErtD504e, A                             | ring finger protein 24                                | NM_178607.4     |
| 26 | Gene Smox    | Smox, PAO, SM                             | spermine oxidase                                      | NM_001177833.1  |
| 21 | Gene Prnp    | PrPSc, Prn-p, C                           | prion protein                                         | NM_011170.2     |
| 18 | Gene Rassf2  | Rassf2, 383043                            | Ras association (RalGDS/AF-6) domain family memb      | NM_175445.4     |
| 23 | Gene Slc23a2 | SVCT2, YSPL3, s                           | solute carrier family 23 (nucleobase transporters), n | NM_018824.2     |
| 31 | Gene Pcna    | Pcna                                      | proliferating cell nuclear antigen                    | NM_011045.2     |
| 31 | Gene Cds2    | 5730460C18Ri                              | CDP-diacylglycerol synthase (phosphatidate cytidyly   | NM_138651.6     |
| 22 | Gene Gpcpd1  | 2310004G06Ri                              | glycerophosphocholine phosphodiesterase GDE1 ho       | NM_028802.2, NM |
| 30 | Gene Trmt6   | mKIAA1153, T1                             | tRNA methyltransferase 6                              | NM_175113.3     |
| 30 | Gene Mcm8    | 5730432L01Ri                              | minichromosome maintenance deficient 8 (S. cerevi     | NM_025676.3     |
| 18 | Gene Lrrn4   | B430119L13Ri                              | leucine rich repeat neuronal 4                        | NM_177303.4     |
| 19 | Gene Bmp2    | Bmp2a, Bmp2, b                            | bone morphogenetic protein 2                          | NM_007553.2     |
| 18 | Gene Plcb1   | 3110043I21Rik                             | phospholipase C, beta 1                               | NM_019677.2, NM |
| 25 | Gene Jag1    | Jag1, Ser-1, Ht                           | jagged 1                                              | NM_013822.5     |
| 19 | Gene Ism1    | Ism1, Ism, Isth                           | isthmin 1 homolog (zebrafish)                         | NM_001126490.1  |
| 22 | Gene Bfsp1   | Bfsp1                                     |                                                       | NM_009751.2     |
| 26 | Gene Dstn    | sid23p, Dstn, 2                           | destrin                                               | NM_019771.2     |
| 30 | Gene Rrbp1   | p180, 573046E                             | ribosome binding protein 1                            | NM_024281.2, NM |
| 42 | Gene Snx5    | 0910001N05Ri                              | sorting nexin 5                                       | NM_001199188.1  |
| 42 | Gene Snord17 | Snord17, MBI-                             | small nucleolar RNA, C/D box 17                       | NR_030762.1     |
| 42 | Gene Mgme1   | 8430406I07Rik                             | mitochondrial genome maintainance exonuclease 1       | NM_028984.4     |
| 26 | Gene Sec23b  | Sec23b                                    |                                                       | NM_001252543.1  |

|    |              |                                           |                                                      |                  |
|----|--------------|-------------------------------------------|------------------------------------------------------|------------------|
| 26 | Gene Gm561   | Gm561                                     | predicted gene 561                                   | NM_001033297.2   |
| 26 | Gene Dtd1    | Dtd1, Hars2,                              | 0610006H08Rik                                        | NM_025314.3      |
| 37 | Gene Naa20   | MGC144325, N(alpha)-acetyltransferase 20, | NatB catalytic subunit                               | NM_026425.3, NM  |
| 31 | Gene Crnkl1  | Crnkl1, crn,                              | 57 Crn, crooked neck-like 1 (Drosophila)             | NM_025820.3      |
| 31 | Gene 4930529 | MGC129508, 4                              | RIKEN cDNA 4930529M08 gene                           | NM_175280.3      |
| 19 | Gene Insm1   | IA-1, Insm1                               | insulinoma-associated 1                              | NM_016889.3      |
| 36 | Gene Xrn2    | Xrn2                                      | 5'-3' exoribonuclease 2                              | NM_011917.2      |
| 17 | Gene Foxa2   | HNF3beta, HN                              | forkhead box A2                                      | NM_010446.2      |
| 24 | Gene Sstr4   | sst4, Smstr4,                             | S somatostatin receptor 4                            | NM_009219.3      |
| 24 | Gene Thbd    | CD141, TM,                                | Th thrombomodulin                                    | NM_009378.3      |
| 23 | Gene Nxt1    | 1110001N02Ri                              | NTF2-related export protein 1                        | NM_019761.6, NM  |
| 23 | Gene Gzf1    | Gzf1, Zfp336,                             | xi GDNF-inducible zinc finger protein 1              | NM_028986.3      |
| 26 | Gene Cst3    | CysC, Cst3                                | cystatin C                                           | NM_009976.3      |
| 25 | Gene Syndig1 | Syndig1,                                  | OTTM synapse differentiation inducing 1              | NM_001085521.2   |
| 25 | Gene Apmap   | 2310001A20Ri                              | adipocyte plasma membrane associated protein         | NM_027977.2      |
| 25 | Gene Acss1   | AceCS2, Acss1,                            | acyl-CoA synthetase short-chain family member 1      | NM_080575.2      |
| 18 | Gene E130215 | E130215H24Ri                              | RIKEN cDNA E130215H24 gene                           | NR_040331.1      |
| 32 | Gene Pygb    | MGC36329,                                 | Py brain glycogen phosphorylase                      | NM_153781.1      |
| 24 | Gene Ninl    | mKIAA0980,                                | 4' ninein-like                                       | NM_207204.2      |
| 31 | Gene Fkbp1a  | FKBP12-T1,                                | FK FK506 binding protein 1a                          | NM_008019.2      |
| 33 | Gene Psmf1   | AW048666,                                 | Ps proteasome (prosome, macropain) inhibitor subunit | NM_212446.1      |
| 33 | Gene 4930556 | 1700020P01Ri                              | RIKEN cDNA 4930556L07 gene                           | XR_107453.1, XR_ |
| 27 | Gene Scrt2   | Scrt2, AW0606                             | scratch homolog 2, zinc finger protein (Drosophila)  | NM_001160410.1   |
| 25 | Gene Srxn1   | Srxn1, Npn3,                              | S sulfiredoxin 1 homolog (S. cerevisiae)             | NM_029688.5      |
| 30 | Gene Csnk2a1 | MGC102141,                                | C casein kinase 2, alpha 1 polypeptide               | NM_007788.3      |
| 17 | Gene Tbc1d20 | 2810442O16Ri                              | TBC1 domain family, member 20                        | NM_024196.3      |
| 21 | Gene Rbck1   | HOIL-1L, HOIL-                            | RanBP-type and C3HC4-type zinc finger containing 1   | NM_019705.3, NM  |
| 21 | Gene Trib3   | SKIP3, TRB-3,                             | tribbles homolog 3 (Drosophila)                      | NM_175093.2      |
| 36 | Gene Sox12   | Sox12, 201020                             | SRY-box containing gene 12                           | NM_011438.2      |
| 33 | Gene Zcchc3  | Zcchc3, 281041                            | zinc finger, CCHC domain containing 3                | NM_175126.4      |
| 33 | Gene 6820408 | 6820408C15Rik                             |                                                      | NM_177656.3      |
| 21 | Gene Defb25  | Defb25,                                   | OTTM defensin beta 25                                | NM_001039122.1   |
| 25 | Gene Rem1    | Rem, E030011                              | rad and gem related GTP binding protein 1            | NM_009047.5      |
| 48 | Gene H13     | 1200006O09Ri                              | histocompatibility 13                                | NM_010376.4, NM  |
| 39 | Gene Id1     | Idb1, Id1,                                | D2W inhibitor of DNA binding 1                       | NM_010495.2      |
| 24 | Gene Bcl2l1  | BclX, MGC1131                             | BCL2-like 1                                          | NM_009743.4      |
| 21 | Gene Tpx2    | Tpx2, REPP86,                             | TPX2, microtubule-associated protein homolog (Xen    | NM_001141975.1   |
| 24 | Gene Mylk2   | 9830004H17Ri                              | myosin, light polypeptide kinase 2, skeletal muscle  | NM_001081044.2   |
| 29 | Gene Foxs1   | FREAC10,                                  | Fkh3 forkhead box S1                                 | NM_010226.2      |
| 29 | Gene Dusp15  | AI851682,                                 | T-D' dual specificity phosphatase-like 15            | NM_145744.2, NM  |
| 36 | Gene Ttl9    | Ttl9, 4930509                             | tubulin tyrosine ligase-like family, member 9        | NM_001083618.1   |
| 36 | Gene Pdrgr1  | Pdrgr, 1110004                            | p53 and DNA damage regulated 1                       | NM_178939.2      |
| 26 | Gene Xkr7    | Xkr7, AY53425                             | X Kell blood group precursor related family member   | NM_001011732.1   |
| 27 | Gene Kif3b   | Kif3b, AI85431                            | kinesin family member 3B                             | NM_008444.4      |
| 31 | Gene 2500004 | 2500004C02Ri                              | RIKEN cDNA 2500004C02 gene                           | NR_040318.1      |
| 31 | Gene Asxl1   | Asxl1, mKIAA0978,                         | DKFZp434N0535                                        | NM_001039939.1   |
| 31 | Gene 8430427 | 8430427H17Ri                              | RIKEN cDNA 8430427H17 gene                           | NM_001134300.2   |

|    |                                                                                    |                  |
|----|------------------------------------------------------------------------------------|------------------|
| 23 | Gene 7530422 Gm563, 75304 RIKEN cDNA 7530422B04 gene                               | XM_003945357.1,  |
| 23 | Gene Dnmt3b MGC124407, DNA methyltransferase 3B                                    | NM_001003961.3   |
| 22 | Gene Snta1 Snt1, AW2289: syntrophin, acidic 1                                      | NM_009228.2      |
| 19 | Gene Cbfa2t2 C330013D05Ri core-binding factor, runt domain, alpha subunit 2, tr    | NM_172860.2, NM  |
| 19 | Gene Necab3 Apba2bp, XB5: N-terminal EF-hand calcium binding protein 3             | NM_021546.3      |
| 19 | Gene E2f1 mKIAA4009, E: E2F transcription factor 1                                 | NM_007891.4      |
| 24 | Gene Pxmp4 Pmp24, 30100 peroxisomal membrane protein 4                             | NM_021534.3      |
| 24 | Gene Zfp341 MGC73471, Zn zinc finger protein 341                                   | NM_199304.1      |
| 16 | Gene Chmp4b Snf7-2, C7684 charged multivesicular body protein 4B                   | NM_029362.3      |
| 39 | Gene Raly Merc, AI66384 hnRNP-associated with lethal yellow                        | NM_023130.3, NM  |
| 28 | Gene Eif2s2 AA571381, 38l eukaryotic translation initiation factor 2, subunit 2 (l | NM_026030.2      |
| 27 | Gene Itch C230047C07Ri itchy, E3 ubiquitin protein ligase                          | NM_001243712.1   |
| 31 | Gene Trp53inr 1110029F20Ri transformation related protein 53 inducible nuclear     | NM_178111.3      |
| 31 | Gene Ncoa6 ASC2, ASC-2, N nuclear receptor coactivator 6                           | NM_001242558.1   |
| 29 | Gene Trpc4ap 4833429F06Ri transient receptor potential cation channel, subfam      | NM_019828.2, NM  |
| 29 | Gene Edem2 9530090G24Ri ER degradation enhancer, mannosidase alpha-like 2          | NM_145537.2      |
| 19 | Gene Mmp24 Mmp24, MT5- matrix metalloproteinase 24                                 | NM_010808.3      |
| 19 | Gene BC02972 BC029722 cDNA sequence BC029722                                       | NR_015528.1      |
| 19 | Gene Eif6 CAB, AA40889 eukaryotic translation initiation factor 6                  | NM_010579.2      |
| 19 | Gene Fam83c Fam83c, MGC: family with sequence similarity 83, member C              | NM_027788.2      |
| 30 | Gene Cep250 AW490617, Ce centrosomal protein 250                                   | NM_008383.3, NM  |
| 26 | Gene Spag4 MGC130280, M sperm associated antigen 4                                 | NM_139151.4      |
| 26 | Gene Cpne1 mKIAA4108, 1: copine I                                                  | NM_170588.3, NM  |
| 23 | Gene Rbm12 AI852903, 943 RNA binding motif protein 12                              | NM_029397.3, NM  |
| 43 | Gene Nfs1 m-Nfs1, m-Nfs1 nitrogen fixation gene 1 (S. cerevisiae)                  | NM_010911.2      |
| 43 | Gene Romo1 Romo1, 20101 reactive oxygen species modulator 1                        | NM_001164216.1   |
| 43 | Gene Rbm39 2310040E03Ri RNA binding motif protein 39                               | NM_133242.2      |
| 41 | Gene LOC101055858 uncharacterized LOC101055858                                     | XM_003946106.1,  |
| 37 | Gene Phf20 Phf20, 682040 PHD finger protein 20                                     | NM_172674.2      |
| 30 | Gene Scand1 2310003H23Ri SCAN domain-containing 1                                  | NM_020255.3      |
| 30 | Gene Cnbd2 4921517L17Ri cyclic nucleotide binding domain containing 2              | NM_027585.2      |
| 30 | Gene Gm1425 OTTMUSG000i predicted gene 14251                                       |                  |
| 29 | Gene Gm1417 OTTMUSG000i ribosomal protein L37a pseudogene                          |                  |
| 29 | Gene Epb4.111 mKIAA0338, E erythrocyte protein band 4.1-like 1                     | NM_013510.3, NM  |
| 17 | Gene Gm1416 OTTMUSG000i predicted gene 14169                                       | NR_040372.1      |
| 26 | Gene Dlgap4 KIAA0964, MG discs, large homolog-associated protein 4 (Drosophi       | NM_001042487.1   |
| 26 | Gene 4930405 4930405A21Ri RIKEN cDNA 4930405A21 gene                               | NR_040505.1      |
| 32 | Gene Gm1423 Gm14230, OTI predicted gene 14230                                      | XR_107459.1, XR_ |
| 32 | Gene Tgif2 C80753, 49215 TGFB-induced factor homeobox 2                            | NM_173396.2      |
| 28 | Gene 5430405 2610307N17Ri RIKEN cDNA 5430405H02 gene                               | NR_015591.1, NR_ |
| 28 | Gene 4930518 4930518I15Ri RIKEN cDNA 4930518I15 gene                               | XR_104749.2      |
| 28 | Gene 1110008 1110008F13Ri RIKEN cDNA 1110008F13 gene                               | NM_026124.3      |
| 28 | Gene Sla2 SLAP2, A9300 Src-like-adaptor 2                                          | NM_029983.5      |
| 30 | Gene Dsn1 Dsn1, AW5524 DSN1, MIND kinetochore complex component, hom               | NM_025853.3      |
| 30 | Gene Soga1 Soga, D43003 suppressor of glucose, autophagy associated 1              | NM_001164663.1   |
| 25 | Gene Tlhc2 Gm1332, Tlhc2 TBC/LysM associated domain containing 2                   | NM_001177439.1   |
| 26 | Gene Samhd1 E330031J07Ri SAM domain and HD domain, 1                               | NM_018851.3, NM  |

|    |                   |                                                                    |                  |
|----|-------------------|--------------------------------------------------------------------|------------------|
| 23 | Gene Rbl1         | PRB1, p107, A1 retinoblastoma-like 1 (p107)                        | NM_011249.2, NM  |
| 36 | Gene Mroh8        | Mroh8, 492251 maestro heat-like repeat family member 8             | NM_001039557.3   |
| 36 | Gene Rpn2         | AV261018, 13( ribophorin II                                        | NM_019642.4      |
| 24 | Gene Manbal       | AI836500, 181 mannosidase, beta A, lysosomal-like                  | NM_026968.3      |
| 35 | Gene Blcap        | MGC102074, E bladder cancer associated protein homolog (human)     | NM_016916.3      |
| 35 | Gene Nnat         | Nnat, Peg5, AV neuronatin                                          | NM_010923.2, NM  |
| 30 | Gene 9430008      | 9430008C03Ri RIKEN cDNA 9430008C03 gene                            | NR_015463.1, NR_ |
| 25 | Gene Ralgapb      | AI507211, mKI Ral GTPase activating protein, beta subunit (non-cat | NM_177658.3      |
| 37 | Gene Ppp1r16      | TIMAP, Ppp1r1 protein phosphatase 1, regulatory (inhibitor) subuni | NM_153089.4, NM  |
| 37 | Gene Fam83d       | BB104611, Far family with sequence similarity 83, member D         | NM_027975.2      |
| 24 | Gene Mafb         | Mafb, Krml1, kv-maf musculoaponeurotic fibrosarcoma oncogene       | NM_010658.3      |
| 33 | Gene Top1         | Top-1, Top1, D topoisomerase (DNA) I                               | NM_009408.2      |
| 33 | Gene Plcg1        | Plcg1, AI89414 phospholipase C, gamma 1                            | NM_021280.3      |
| 27 | Gene Zhx3         | 9530010N21Ri zinc fingers and homeoboxes 3                         | NM_177263.3      |
| 27 | Gene Lpin3        | AA438110, KIA lipin 3                                              | NM_001199118.1,  |
| 25 | Gene Emilin3      | EMILIN-T, 111( elastin microfibril interfacer 3                    | NM_182840.1      |
| 36 | Gene Srsf6        | Srsf6, AW1461 serine/arginine-rich splicing factor 6               | NM_026499.4      |
| 26 | Gene Sgk2         | Sgkl, AI098171 serum/glucocorticoid regulated kinase 2             | NM_013731.2      |
| 26 | Gene Ift52        | MGC47065, BC intraflagellar transport 52                           | NM_172150.4      |
| 25 | Gene Mybl2        | Mybl2, B-Myb, myeloblastosis oncogene-like 2                       | NM_008652.2      |
| 36 | Gene 3230401      | 3230401D17Ri RIKEN cDNA 3230401D17 gene                            | NM_025699.2      |
| 48 | Gene Fitm2        | Fit2, Fitm2, D9 fat storage-inducing transmembrane protein 2       | NM_173397.4      |
| 48 | Gene 2310001      | 2310001K24Ri RIKEN cDNA 2310001K24 gene                            | NR_028122.1      |
| 29 | Gene Serinc3      | TMS-1, DIFF33 serine incorporator 3                                | NM_012032.4      |
| 29 | Gene 0610039      | 0610039K10Ri RIKEN cDNA 0610039K10 gene                            | NR_028113.1      |
| 29 | Gene Ywhab        | Ywhab, 13000( tyrosine 3-monooxygenase/tryptophan 5-monooxyg       | NM_018753.6      |
| 34 | Gene Tomm34       | TOM34, 26101 translocase of outer mitochondrial membrane 34        | NM_025996.4      |
| 34 | Gene Stk4         | AU020804, Ysk serine/threonine kinase 4                            | NM_021420.3      |
| 20 | Gene Kcns1        | Kv9.1, Kcns1 K+ voltage-gated channel, subfamily S, 1              | NM_008435.2      |
| 20 | Gene Wfdc5        | Prg5, PRG5, BC WAP four-disulfide core domain 5                    | NM_145369.3      |
| 16 | Gene Sdc4         | Sdc4, Synd4, A syndecan 4                                          | NM_011521.2      |
| 30 | Gene Sys1         | 2610042O14Ri SYS1 Golgi-localized integral membrane protein hon    | NM_025575.3      |
| 30 | Gene Trp53tg5     | Trp53tg5, 170( transformation related protein 53 target 5          | XR_033202.2, XR_ |
| 32 | Gene Dnbdd2       | 1110017A21Ri dysbindin (dystrobrevin binding protein 1) domain c   | NM_001048227.1   |
| 32 | Gene Pigt         | 2510012P17Ri phosphatidylinositol glycan anchor biosynthesis, cla  | NM_133779.2      |
| 25 | Gene Wfdc3        | 1700127F16Ri WAP four-disulfide core domain 3                      | NM_027961.1      |
| 25 | Gene LOC101055924 | uncharacterized LOC101055924                                       | XM_003945346.1,  |
| 25 | Gene Dnttip1      | 6430706C13Ri deoxynucleotidyltransferase, terminal, interacting p  | NM_133763.1      |
| 32 | Gene Tnnc2        | Tnncs, Tnnc2 troponin C2, fast                                     | NM_009394.2      |
| 32 | Gene Snx21        | AI481716, 573 sorting nexin family member 21                       | NM_133924.3      |
| 32 | Gene Acot8        | PTE-2, Acot8, Facyl-CoA thioesterase 8                             | NM_133240.2      |
| 32 | Gene Zswim1       | Zswim1, 2410( zinc finger SWIM-type containing 1                   | NM_028028.2      |
| 32 | Gene Spata25      | 1700020C07Ri spermatogenesis associated 25                         | NM_029370.1      |
| 32 | Gene Neurl2       | Neurl2, Ozz-E3 neuralized-like 2 (Drosophila)                      | NM_001082974.2   |
| 32 | Gene Ctsa         | Ctsa, Ppgb, AU cathepsin A                                         | NM_001038492.1,  |
| 32 | Gene Pltp         | Bpife, Pltp, OD phospholipid transfer protein                      | NM_011125.2      |
| 37 | Gene Pcif1        | MGC25976, C2 PDX1 C-terminal inhibiting factor 1                   | NM_146129.3      |



|    |              |                                                                                   |                          |
|----|--------------|-----------------------------------------------------------------------------------|--------------------------|
| 32 | Gene Zfp335  | Nif1, 1810045, zinc finger protein 335                                            | NM_199027.2              |
| 32 | Gene Gm1145  | Gm11458, OT predicted gene 11458                                                  | XR_107466.1, XR_107467.1 |
| 18 | Gene Slc12a5 | KCC2, mKIAA1 solute carrier family 12, member 5                                   | NM_020333.2              |
| 37 | Gene Ncoa5   | Ncoa5, CIA, M nuclear receptor coactivator 5                                      | NM_144892.1              |
| 27 | Gene Slc35c2 | CGI-15, D2Wsu solute carrier family 35, member C2                                 | NM_001252573.1           |
| 27 | Gene Elmo2   | Elmo2, CED-12 engulfment and cell motility 2                                      | NM_080287.2, NM_080288.2 |
| 22 | Gene Slc13a3 | SDCT2, NaDC3 solute carrier family 13 (sodium-dependent dicarboxylate)            | NM_054055.2              |
| 23 | Gene Ncoa3   | Rac3, Actr, 201 nuclear receptor coactivator 3                                    | NM_008679.3              |
| 25 | Gene Sulf2   | Sulf2, AU0202, sulfatase 2                                                        | NM_001252578.1           |
| 23 | Gene Prex1   | G630042G04, phosphatidylinositol-3,4,5-trisphosphate-dependent phosphatase        | NM_177782.3              |
| 19 | Gene Trp53rk | Nori-2, MGC28568, transformation related protein 53 regulating kinase             | NM_023815.4              |
| 37 | Gene Arfgef2 | AI463430, ArfG ADP-ribosylation factor guanine nucleotide-exchange factor 2       | NM_001085495.2           |
| 37 | Gene Cse1l   | Capt5, Cse1l, A chromosome segregation 1-like ( <i>S. cerevisiae</i> )            | NM_023565.3              |
| 18 | Gene Stau1   | AW549911, 58stauden (RNA binding protein) homolog 1 ( <i>Drosophila</i> )         | NM_011490.3, NM_011491.3 |
| 28 | Gene Ddx27   | C86129, Ddx27 DEAD (Asp-Glu-Ala-Asp) box polypeptide 27                           | NM_153065.3              |
| 22 | Gene Znfx1   | Znfx1, AI4811C zinc finger, NFX1-type containing 1                                | NM_001033196.2           |
| 22 | Gene 1500012 | 1500012F01Ri RIKEN cDNA 1500012F01 gene                                           | NM_001081005.1           |
| 22 | Gene Snord12 | Snord12, MBII small nucleolar RNA, C/D box 12                                     | NR_028540.1              |
| 29 | Gene Kcnb1   | Kcnb1, Kv2.1, potassium voltage gated channel, Shab-related subfamily B           | NM_008420.4              |
| 24 | Gene Ptgis   | Pgis, Cyp8, Cy prostaglandin I2 (prostacyclin) synthase                           | NM_008968.3              |
| 32 | Gene Spata2  | MGC38980, AI spermatogenesis associated 2                                         | NM_170756.2              |
| 32 | Gene Rnf114  | 1110008J21Ri ring finger protein 114                                              | NM_030743.5              |
| 31 | Gene Snai1   | Snai1, Sna, Sna snail homolog 1 ( <i>Drosophila</i> )                             | NM_011427.2              |
| 17 | Gene Ube2v1  | AI256840, 061 ubiquitin-conjugating enzyme E2 variant 1                           | NM_023230.2              |
| 23 | Gene Tmem18  | Kua, Tmem18 transmembrane protein 189                                             | NM_145538.2              |
| 29 | Gene Cebpb   | NF-IL6, Nfil6, IICCAAT/enhancer binding protein (C/EBP), beta                     | NM_009883.3              |
| 29 | Gene A530013 | A530013C23Ri RIKEN cDNA A530013C23 gene                                           | NR_015500.2              |
| 19 | Gene Ptpn1   | PTP-1B, PTP1B protein tyrosine phosphatase, non-receptor type 1                   | NM_011201.3              |
| 26 | Gene Pard6b  | AV025615, Par par-6 (partitioning defective 6) homolog beta ( <i>C. elegans</i> ) | NM_021409.2              |
| 24 | Gene Adnp    | AA589558, Ad activity-dependent neuroprotective protein                           | NM_009628.2              |
| 38 | Gene Dpm1    | AI194292, AI1 dolichol-phosphate (beta-D) mannosyltransferase 1                   | NM_010072.3              |
| 38 | Gene Mocs3   | 1700020H17Ri molybdenum cofactor synthesis 3                                      | NM_001160330.1           |
| 23 | Gene Zfp64   | Zfp64 zinc finger protein 64                                                      | NM_009564.2              |
| 26 | Gene Tshz2   | KIAA4248, Sdc teashirt zinc finger family member 2                                | NM_080455.2              |
| 21 | Gene Pfdn4   | C-1, C1, 18100 prefoldin 4                                                        | NM_001110152.2           |
| 21 | Gene Gm1679  | Gm16796 predicted gene, 16796                                                     | NR_040367.1              |
| 25 | Gene Cbln4   | AI848962, Cblr cerebellin 4 precursor protein                                     | NM_175631.3              |
| 25 | Gene Fam210l | AV108736, AI4 family with sequence similarity 210, member B                       | NM_025912.4              |
| 29 | Gene Bmp7    | Bmp7, OP1 bone morphogenetic protein 7                                            | NM_007557.2              |
| 26 | Gene Spo11   | AI449549, Spo SPO11 meiotic protein covalently bound to DSB homolog               | NM_001083960.1           |
| 34 | Gene Rae1    | 3230401112Ri RAE1 RNA export 1 homolog ( <i>S. pombe</i> )                        | NM_175112.5              |
| 34 | Gene Rbm38   | Seb4l, Seb4, R RNA binding motif protein 38                                       | NM_019547.2              |
| 26 | Gene Rab22a  | Rab22a, Rab22 RAB22A, member RAS oncogene family                                  | NM_024436.3              |
| 26 | Gene Vapb    | Vamp33b, Vap vesicle-associated membrane protein, associated protein              | NM_019806.5              |
| 23 | Gene Stx16   | AI648908, Stx1 syntaxin 16                                                        | NM_172675.4, NM_172676.4 |
| 38 | Gene Gnas    | GPSA, Gnas1, IGNAS (guanine nucleotide binding protein, alpha subunit)            | NM_019690.2, NM_019691.2 |
| 36 | Gene Ctsz    | D2Wsu143e, A cathepsin Z                                                          | NM_022325.4              |

|    |              |                                                                           |                  |
|----|--------------|---------------------------------------------------------------------------|------------------|
| 30 | Gene Sycp2   | 3830402K23Ri synaptonemal complex protein 2                               | NM_177191.3      |
| 30 | Gene Ppp1r3d | Gm359, Ppp1r protein phosphatase 1, regulatory subunit 3D                 | NM_001085501.1   |
| 30 | Gene Fam217l | 9030418K01Ri family with sequence similarity 217, member B                | NM_001081289.1   |
| 30 | Gene Taf4a   | Taf4a, AI45031TAF4A RNA polymerase II, TATA box binding protein           | NM_001081092.1   |
| 30 | Gene 4921531 | 4921531C22Ri RIKEN cDNA 4921531C22 gene                                   | NR_033782.1      |
| 45 | Gene Lsm14b  | Lsm14b, 9430(LSM14 homolog B (SCD6, <i>S. cerevisiae</i> ))               | NM_177727.4      |
| 45 | Gene PsmA7   | PsmA7, C6-I proteasome (prosome, macropain) subunit, alpha type           | NM_011969.1      |
| 45 | Gene Ss18l1  | CREST, Ss18l1, synovial sarcoma translocation gene on chromosome          | NM_178750.5      |
| 28 | Gene Osbpl2  | KIAA0772, mKl oxysterol binding protein-like 2                            | NM_144500.3      |
| 20 | Gene Adrm1   | AA408205, AU adhesion regulating molecule 1                               | NM_019822.3      |
| 20 | Gene Lama5   | laminin-511, A laminin, alpha 5                                           | NM_001081171.2   |
| 24 | Gene Mrgbp   | Mrgbp, AW06(MRG/MORF4L binding protein)                                   | NM_028479.1      |
| 24 | Gene Ogfr    | Ogfr, 2010013 opioid growth factor receptor                               | NM_031373.3      |
| 24 | Gene Dido1   | Datf1, DIO-1, r death inducer-obliterator 1                               | NM_011805.2, NM  |
| 24 | Gene Gid8    | 2310003C23Ri GID complex subunit 8 homolog ( <i>S. cerevisiae</i> )       | NM_029607.1      |
| 20 | Gene Bhlhe23 | A930001L02Ri basic helix-loop-helix family, member e23                    | NM_080641.5      |
| 22 | Gene Ythdf1  | 2210410K23Ri YTH domain family 1                                          | NM_173761.3      |
| 22 | Gene Birc7   | E130019N06, Ibaculoviral IAP repeat-containing 7 (livin)                  | NM_001163247.1   |
| 24 | Gene Arfgap1 | Arfgap1, AI115ADP-ribosylation factor GTPase activating protein 1         | NM_001177706.1   |
| 28 | Gene Pdpf    | 2610317A05Ri pancreatic progenitor cell differentiation and proliferation | NM_025598.2      |
| 28 | Gene Ptk6    | Sik, BRK, Tksk, PTK6 protein tyrosine kinase 6                            | NM_009184.2      |
| 23 | Gene Rtel1   | Rtel1, AW5404 regulator of telomere elongation helicase 1                 | NM_001001882.3   |
| 23 | Gene Arfrp1  | 1500006I01Ri ADP-ribosylation factor related protein 1                    | NM_029702.4, NM  |
| 23 | Gene Zgpat   | 1500006I01Ri zinc finger, CCCH-type with G patch domain                   | NM_001048148.1   |
| 43 | Gene Zbtb46  | BZEL, Zbtb46, I zinc finger and BTB domain containing 46                  | NM_027656.2, NM  |
| 23 | Gene Abhd16k | BC050777, 17(abhydrolase domain containing 16B)                           | NM_183181.2      |
| 32 | Gene Tpd52l2 | D54, AU01653 tumor protein D52-like 2                                     | NM_025482.2      |
| 32 | Gene Dnajc5  | Dnajc5, 26103 DnaJ (Hsp40) homolog, subfamily C, member 5                 | NM_016775.2      |
| 42 | Gene Uckl1   | 1110007H10Ri uridine-cytidine kinase 1-like 1                             | NM_026765.3      |
| 42 | Gene Gm1611  | Gm16119, OTI predicted gene 16119                                         | NR_027289.1, NR_ |
| 42 | Gene Znf512b | Gm632, Znf51: zinc finger protein 512B                                    | NM_001164597.1   |
| 26 | Gene Sox18   | Sox18, Ra, Rag SRY-box containing gene 18                                 | NM_009236.2      |
| 26 | Gene Tcea2   | Tcea2, SII-T1, I transcription elongation factor A (SII), 2               | NM_009326.2      |
| 23 | Gene Rgs19   | Rgs19, GAIP, A regulator of G-protein signaling 19                        | NM_026446.3      |
| 20 | Gene 4930526 | Gm692, 49305 RIKEN cDNA 4930526D03 gene                                   | NM_199023.3      |
| 31 | Gene Pex2    | D3ErtD138e, Pxmp3, Pex2, PMP35, 35kDa                                     | NM_001163301.2   |
| 21 | Gene Pkia    | PKIalpha, AI41 protein kinase inhibitor, alpha                            | NM_008862.3      |
| 27 | Gene Tpd52   | mD52, AI0430: tumor protein D52                                           | NM_001025261.1   |
| 26 | Gene Zbtb10  | RINZF, AU0211: zinc finger and BTB domain containing 10                   | NM_177660.3      |
| 23 | Gene Pag1    | Pag1, F730007 phosphoprotein associated with glycosphingolipid r          | NM_053182.5, NM  |
| 27 | Gene Impa1   | 2610002K09Ri inositol (myo)-1(or 4)-monophosphatase 1                     | NM_018864.5      |
| 27 | Gene Slc10a5 | Gm405, mP5, I solute carrier family 10 (sodium/bile acid cotranspor       | NM_001010834.2   |
| 27 | Gene Zfand1  | 2310008M20R zinc finger, AN1-type domain 1                                | NM_025512.2      |
| 17 | Gene Raly    | 0710005M24R RALY RNA binding protein-like                                 | NM_178631.4, NM  |
| 35 | Gene Lrrcc1  | AI447421, Lrrc leucine rich repeat and coiled-coil domain containin       | NM_028915.3, NM  |
| 35 | Gene E2f5    | E2f5, AU02467 E2F transcription factor 5                                  | NM_007892.2      |
| 39 | Gene Ythdf3  | Ythdf3, 91300: YTH domain family 3                                        | NM_172677.3, NM  |

|    |              |                                                                        |                 |
|----|--------------|------------------------------------------------------------------------|-----------------|
| 33 | Gene Pde7a   | AW047537, Al phosphodiesterase 7A                                      | NM_008802.2, NM |
| 27 | Gene Hps3    | Hps3, coa Hermansky-Pudlak syndrome 3 homolog (human)                  | NM_080634.4, NM |
| 19 | Gene Gyg     | Gyg, AU01766 glycogenin                                                | NM_013755.2     |
| 21 | Gene 2810416 | 2810416G20Ri RIKEN cDNA 2810416G20 gene                                | XM_003945668.1  |
| 21 | Gene Tbl1xr1 | DC42, TBLR1, $\beta$ transducin (beta)-like 1X-linked receptor 1       | NM_030732.3     |
| 40 | Gene Ect2    | Ect2, KIAA403 ect2 oncogene                                            | NM_001177625.1  |
| 40 | Gene 1700125 | 1700125G22Ri RIKEN cDNA 1700125G22 gene                                | NR_040548.1     |
| 34 | Gene Fncl3b  | AW550168, Kl fibronectin type III domain containing 3B                 | NM_173182.2     |
| 22 | Gene Tnik    | MGC189859, 4TRAF2 and NCK interacting kinase                           | NM_026910.1, NM |
| 21 | Gene Eif5a2  | MGC124093, Eukaryotic translation initiation factor 5A2                | NM_177586.5     |
| 30 | Gene Sec62   | HTP1, 310000:SEC62 homolog (S. cerevisiae)                             | NM_027016.2     |
| 18 | Gene Gpr160  | Gpr160, 1700G G protein-coupled receptor 160                           | NM_001134385.1, |
| 34 | Gene Phc3    | Edr3, Hph3, EC polyhomeotic-like 3 (Drosophila)                        | NM_153421.2, NM |
| 27 | Gene Prkci   | Prkci, KIAA416 protein kinase C, iota                                  | NM_008857.3     |
| 24 | Gene Skil    | Skil, sno-dE3, $\epsilon$ SKI-like                                     | NM_011386.2, NM |
| 21 | Gene Zfp639  | ANC-2H01, ZAN zinc finger protein 639                                  | NM_144519.4, NM |
| 21 | Gene Mfn1    | KIAA4032, mKl mitofusin 1                                              | NM_024200.4     |
| 33 | Gene Actl6a  | Actl6, C79802, actin-like 6A                                           | NM_019673.2     |
| 19 | Gene Usp13   | ISOT3, AI8480 ubiquitin specific peptidase 13 (isopeptidase T-3)       | NM_001013024.2  |
| 30 | Gene Ttc14   | AW561908, Tt tetratricopeptide repeat domain 14                        | NM_025978.3, NM |
| 19 | Gene Sox2ot  | Sox2ot, B2302 SOX2 overlapping transcript (non-protein coding)         | NR_015580.1     |
| 19 | Gene Sox2    | ysb, Sox2, lcc, SRY-box containing gene 2                              | NM_011443.3     |
| 27 | Gene Mccc1   | 1810045E08Ri methylcrotonoyl-Coenzyme A carboxylase 1 (alpha)          | NM_023644.4     |
| 27 | Gene A330050 | A330050B17Ri RIKEN cDNA A330050B17 gene                                | NR_029456.1     |
| 27 | Gene Ccdc144 | Ccdc144b, MG coiled-coil domain containing 144B                        | NM_178418.4     |
| 19 | Gene Acad9   | 4732402K02, 2 acyl-Coenzyme A dehydrogenase family, member 9           | NM_172678.3     |
| 37 | Gene Exosc9  | PM/Scl-75, Pm exosome component 9                                      | NM_019393.2     |
| 37 | Gene Ccna2   | Ccna2, Ccn-1, cyclin A2                                                | NM_009828.2     |
| 37 | Gene Bbs7    | 8430406N16Ri Bardet-Biedl syndrome 7 (human)                           | NM_027810.3     |
| 27 | Gene Nudt6   | Asfgf2b, MGC2 nudix (nucleoside diphosphate linked moiety X)-type      | NM_153561.2     |
| 27 | Gene Spata5  | Spaf, 2510048 spermatogenesis associated 5                             | NM_021343.2, NM |
| 32 | Gene Spry1   | Spry1, sprouty sprouty homolog 1 (Drosophila)                          | NM_011896.2     |
| 25 | Gene Ankrd50 | AI662170, mKl ankyrin repeat domain 50                                 | NM_001167883.1  |
| 28 | Gene Fat4    | 9430004M15, FAT tumor suppressor homolog 4 (Drosophila)                | NM_183221.3     |
| 28 | Gene Hspa4l  | APG-1, MGC11 heat shock protein 4 like                                 | NM_011020.3     |
| 28 | Gene Plk4    | AI385771, Plk4, Sak, Stk18, 1700028H20                                 | NM_011495.2, NM |
| 17 | Gene Lar1b   | 4933421B21Ri La ribonucleoprotein domain family, member 1B             | NM_001040399.1  |
| 37 | Gene Pgrmc2  | DG6, PMBP, P $\epsilon$ progesterone receptor membrane component 2     | NM_027558.1     |
| 31 | Gene Phf17   | Jade1, AU0414 PHD finger protein 17                                    | NM_172303.4, NM |
| 35 | Gene Ccrn4l  | nocturnin, AU(CCR4 carbon catabolite repression 4-like (S. cerevisiae) | NM_009834.2     |
| 28 | Gene Elf2    | BB183398, NEI E74-like factor 2                                        | NM_023502.1     |
| 28 | Gene 4930577 | 4930577N17Ri RIKEN cDNA 4930577N17 gene                                | XM_003945364.1, |
| 24 | Gene Ndufc1  | 2310016K22Ri NADH dehydrogenase (ubiquinone) 1, subcomplex c           | NM_025523.1     |
| 24 | Gene Naa15   | MGC29428, tu N(alpha)-acetyltransferase 15, NatA auxiliary subuni      | NM_053089.3     |
| 34 | Gene Setd7   | H3K4MT, KMT SET domain containing (lysine methyltransferase) 7         | NM_080793.5     |
| 34 | Gene 5031434 | Gm2370, AI48 RIKEN cDNA 5031434O11 gene                                | NR_033624.1     |
| 33 | Gene Mam13   | Mam-2, KIAA1 mastermind like 3 (Drosophila)                            | NM_001004176.2  |

|    |              |                                                                   |                 |
|----|--------------|-------------------------------------------------------------------|-----------------|
| 34 | Gene Foxo1   | AI876417, FKH forkhead box O1                                     | NM_019739.3     |
| 23 | Gene Lhfp    | AI194968, Lhf lipoma HMGIC fusion partner                         | NM_175386.3     |
| 18 | Gene Nhlrc3  | mKIAA4083, N NHL repeat containing 3                              | NM_172501.2     |
| 18 | Gene Proser1 | Proser1, 2810(proline and serine rich 1                           | NM_173382.1     |
| 19 | Gene Frem2   | nv1, 6030440F Fras1 related extracellular matrix protein 2        | NM_172862.3     |
| 28 | Gene Ufm1    | 1810045K17Ri ubiquitin-fold modifier 1                            | NM_026435.5     |
| 28 | Gene Exosc8  | KIAA4013, mKl exosome component 8                                 | NM_001163570.1  |
| 28 | Gene Alg5    | AV170001, AV asparagine-linked glycosylation 5 (dolichyl-phosphat | NM_025442.3     |
| 18 | Gene Ccna1   | Ccna1, MGC15 cyclin A1                                            | NM_007628.3     |
| 18 | Gene 4931419 | 4931419H13Ri RIKEN cDNA 4931419H13 gene                           | NR_040593.1     |
| 27 | Gene Nbea    | mKIAA1544, L neurobeachin                                         | NM_030595.1     |
| 19 | Gene Mab211  | AW047968, M mab-21-like 1 (C. elegans)                            | NM_010750.3     |
| 18 | Gene Wwtr1   | Wwtr1, Taz, C WW domain containing transcription regulator 1      | NM_133784.3, NM |
| 28 | Gene Pfn2    | Pfn, Pfn2 profilin 2                                              | NM_019410.3     |
| 44 | Gene Tsc22d2 | Tsc22d2, 1810 TSC22 domain family, member 2                       | NM_001081229.1  |
| 35 | Gene Serp1   | D3Ucla1, Serp: stress-associated endoplasmic reticulum protein 1  | NM_030685.3     |
| 35 | Gene Eif2a   | Eif2a, D030048D22, MGC105246, D3Ertd194e                          | NM_001005509.2  |
| 24 | Gene 2810407 | SelT, 2810407(RIKEN cDNA 2810407C02 gene                          | NM_001040396.2  |
| 22 | Gene Siah2   | AA415433, Sia seven in absentia 2                                 | NM_009174.3     |
| 22 | Gene 4930593 | 4933440I01Rik RIKEN cDNA 4930593A02 gene                          | NR_045167.1     |
| 31 | Gene Med12l  | A130035F20, M mediator of RNA polymerase II transcription, subuni | NM_177855.3     |
| 23 | Gene Mbnl1   | Mbnl, Mbnl1, muscleblind-like 1 (Drosophila)                      | NM_020007.3, NM |
| 19 | Gene P2ry1   | P2ry1, P2Y1 purinergic receptor P2Y, G-protein coupled 1          | NM_008772.4     |
| 29 | Gene Rap2b   | AA408554, 40: RAP2B, member of RAS oncogene family                | NM_028712.4     |
| 26 | Gene Arhgef2 | 8430436L14Ril Rho guanine nucleotide exchange factor (GEF) 26     | NM_001081295.1  |
| 20 | Gene Mme     | Mme, C85356, membrane metallo endopeptidase                       | NM_008604.3     |
| 25 | Gene E130311 | E130311K13Ri RIKEN cDNA E130311K13 gene                           | NM_177856.4     |
| 31 | Gene Gmps    | AI047208, Gmps, AA591640                                          | NM_001033300.2  |
| 24 | Gene Ssr3    | Ssr3, AW5538: signal sequence receptor, gamma                     | NM_026155.3     |
| 37 | Gene 4931440 | 4931440P22Ri RIKEN cDNA 4931440P22 gene                           | NR_027955.1     |
| 37 | Gene Tiparp  | ARTD14, PARP TCDD-inducible poly(ADP-ribose) polymerase           | NM_178892.5     |
| 23 | Gene Lekr1   | Gm6534, EG54 leucine, glutamate and lysine rich 1                 | NM_001166659.1, |
| 38 | Gene Ccnl1   | Ccnl, AU01849 cyclin L1                                           | NM_019937.3     |
| 20 | Gene Rarres1 | 5430417P09Ri retinoic acid receptor responder (tazarotene induce  | NM_001164763.1  |
| 19 | Gene Gm2194  | lqj-schip1, Gn predicted gene, 21949                              | NM_001113419.2  |
| 19 | Gene Schip1  | Nf2ip, Schip-1 schwannomin interacting protein 1                  | NM_001113420.1, |
| 26 | Gene 1110032 | AI115547, 111 RIKEN cDNA 1110032F04 gene                          | NM_001167996.1  |
| 35 | Gene lft80   | mKIAA1374, lft80, Wdr56, 4921524P20Rik                            | NM_026641.2     |
| 35 | Gene Smc4    | SMC-4, Smc4l1 structural maintenance of chromosomes 4             | NM_133786.3     |
| 35 | Gene Mir15b  | mmu-mir-15b, microRNA 15b                                         | NR_029529.1     |
| 35 | Gene Mir16-2 | mir-16-2, Mir1 microRNA 16-2                                      | NR_029735.1     |
| 25 | Gene Trim59  | 2700022F13Ri tripartite motif-containing 59                       | NM_025863.3     |
| 33 | Gene Kpna4   | Kpna4, 111005 karyopherin (importin) alpha 4                      | NM_008467.4     |
| 33 | Gene Gm1647  | Gm1647 predicted gene 1647                                        | NM_001243000.1  |
| 27 | Gene Ppm1l   | 3222401G13, P protein phosphatase 1 (formerly 2C)-like            | NM_178726.3     |
| 27 | Gene Nmd3    | Nmd3, C87860 NMD3 homolog (S. cerevisiae)                         | NM_133787.2     |
| 25 | Gene Golim4  | GPP130, GIMP golgi integral membrane protein 4                    | NM_175193.5     |

|    |              |                                                                   |                  |
|----|--------------|-------------------------------------------------------------------|------------------|
| 18 | Gene Fnip2   | Fnip2, D63002 folliculin interacting protein 2                    | NM_001162999.2   |
| 18 | Gene 4930589 | 4930589L23Ril RIKEN cDNA 4930589L23 gene                          | XR_140605.1      |
| 25 | Gene Ppid    | CYP-40, Ppid, 4 peptidylprolyl isomerase D (cyclophilin D)        | NM_026352.3      |
| 29 | Gene Pdgfc   | 1110064L01Ril platelet-derived growth factor, C polypeptide       | NM_019971.2      |
| 22 | Gene Sfrp2   | AI851596, Sdf: secreted frizzled-related protein 2                | NM_009144.2      |
| 27 | Gene D930015 | Kiaa0922, D93 RIKEN cDNA D930015E06 gene                          | NM_172681.4      |
| 21 | Gene Fhdc1   | Gm126, Fhdc1 FH2 domain containing 1                              | NM_001033301.4   |
| 27 | Gene Arfip1  | AW123087, Ar ADP-ribosylation factor interacting protein 1        | NM_001081093.1   |
| 26 | Gene Fbxw7   | Fbwd6, Fbxw7 F-box and WD-40 domain protein 7                     | NM_001177773.1   |
| 38 | Gene Rps3a1  | MGC102469, Ribosomal protein S3A1                                 | NM_016959.4      |
| 38 | Gene Snord73 | U73a, Rnu73a, small nucleolar RNA, C/D box U73A                   | NR_004417.1      |
| 38 | Gene Rnu73b  | Rnu73b, U73b U73B small nuclear RNA                               | NR_004418.1      |
| 24 | Gene Lrba    | Lab300, Lba, D LPS-responsive beige-like anchor                   | NM_001077687.1   |
| 19 | Gene Dclk2   | CL2, Dclk2, Clic doublecortin-like kinase 2                       | NM_001195496.1   |
| 25 | Gene Etv3    | AI414410, Etv: ets variant gene 3                                 | NM_001083318.1   |
| 19 | Gene Arhgef1 | MGC90827, m Rho guanine nucleotide exchange factor (GEF) 11       | NM_001003912.1   |
| 19 | Gene Prcc    | Prcc papillary renal cell carcinoma (translocation-associated)    | NM_033573.2      |
| 28 | Gene Hdgf    | Hdgf, AI11807 hepatoma-derived growth factor                      | NM_008231.4      |
| 22 | Gene Mrpl24  | 2810470K06Ri mitochondrial ribosomal protein L24                  | NM_026591.3      |
| 22 | Gene Rrnad1  | Rrnad1, BC023 ribosomal RNA adenine dimethylase domain contain    | NM_153562.4      |
| 22 | Gene Isg20l2 | Isg20l2, 49304 interferon stimulated exonuclease gene 20-like 2   | NM_177663.4      |
| 23 | Gene Nes     | Nes, C78523, Nestin                                               | NM_016701.3      |
| 21 | Gene Bcan    | Bcan, Cspg7 brevican                                              | NM_007529.2, NM  |
| 18 | Gene Hapln2  | Bral1, 4930401 hyaluronan and proteoglycan link protein 2         | NM_022031.2      |
| 27 | Gene Gm1943  | Gm19439 predicted gene, 19439                                     | XR_107508.1, XR_ |
| 28 | Gene Gpatch4 | 2610029K21Ri G patch domain containing 4                          | NM_025663.3, NM  |
| 28 | Gene Apoa1b  | ESTM37, AI-BP apolipoprotein A-I binding protein                  | NM_144897.3      |
| 24 | Gene Ttc24   | MGC58815, A4 tetratricopeptide repeat domain 24                   | NM_172526.3      |
| 24 | Gene Iqgap3  | Iqgap3, AI5934 IQ motif containing GTPase activating protein 3    | NM_001033484.1   |
| 38 | Gene Gm1945  | Gm19451 predicted gene, 19451                                     | XR_107509.1, XR_ |
| 38 | Gene Mef2d   | MGC31718, C8 myocyte enhancer factor 2D                           | NM_133665.3      |
| 18 | Gene Gm3764  | Gm3759, Gm3 predicted gene 3764                                   | XR_168410.1      |
| 22 | Gene Pmf1    | AW060657, 26 polyamine-modulated factor 1                         | NM_025928.3      |
| 22 | Gene Slc25a4 | 6720482A19, E solute carrier family 25, member 44                 | NM_178696.4, NM  |
| 29 | Gene Lmna    | Lmna, Dhe                                                         | NM_019390.2, NM  |
| 27 | Gene Mex3a   | Rkhd4, AA387: mex3 homolog A (C. elegans)                         | NM_001029890.2   |
| 27 | Gene Mir1905 | Mir1905, Mirn microRNA 1905                                       | NR_035434.1      |
| 28 | Gene Rab25   | Rab25, AV012: RAB25, member RAS oncogene family                   | NM_016899.4      |
| 28 | Gene Lamtor2 | Lamtor2, Rab2 late endosomal/lysosomal adaptor, MAPK and MTO      | NM_031248.3      |
| 28 | Gene Ubqln4  | Ubqln4, CIP75, ubiquilin 4                                        | NM_033526.2      |
| 23 | Gene Arhgef2 | GEFH1, Lbcl1, rho/rac guanine nucleotide exchange factor (GEF) 2  | NM_008487.3, NM  |
| 29 | Gene 2810403 | AI451678, 281 RIKEN cDNA 2810403A07 gene                          | NM_028814.3      |
| 26 | Gene Dap3    | DAP-3, 492151 death associated protein 3                          | NM_022994.3, NM  |
| 26 | Gene Ash1l   | Ash1, E430018 ash1 (absent, small, or homeotic)-like (Drosophila) | NM_138679.5      |
| 26 | Gene Rusc1   | 2210403N08Ri RUN and SH3 domain containing 1                      | NM_001083807.1   |
| 26 | Gene Fdps    | MGC107162, r farnesyl diphosphate synthetase                      | NM_001253751.1   |
| 22 | Gene Clk2    | AU041688, Tu: CDC-like kinase 2                                   | NM_007712.3, NM  |

|    |              |                                                                       |                  |
|----|--------------|-----------------------------------------------------------------------|------------------|
| 22 | Gene Scamp3  | Scamp3, TU52, secretory carrier membrane protein 3                    | NM_011886.2      |
| 22 | Gene Fam189l | 1110013L07Ril family with sequence similarity 189, member B           | NM_001014995.1   |
| 31 | Gene Gba     | Gba1, GC, Gba glucosidase, beta, acid                                 | NM_001077411.1,  |
| 31 | Gene Mtx1    | Mtx, Gcap6, Mmetaxin 1                                                | NM_013604.2, NM  |
| 31 | Gene Thbs3   | Thbs3, Thbs-3, thrombospondin 3                                       | NM_013691.2      |
| 25 | Gene Dpm3    | Dpm3, 111000 dolichyl-phosphate mannosyltransferase polypeptid        | NM_026767.3      |
| 25 | Gene Slc50a1 | MmSWEET1, R solute carrier family 50 (sugar transporter), member      | NM_009057.3      |
| 27 | Gene Efna1   | Efna1, B61, Ep ephrin A1                                              | NM_010107.4, NM  |
| 24 | Gene Efna3   | MGC129300, Ephrin A3                                                  | NM_010108.1      |
| 24 | Gene Gm1599  | ENSMUSG000 (predicted gene 15998)                                     | XR_104847.1      |
| 24 | Gene Efna4   | LERK-4, Efna4, ephrin A4                                              | NM_007910.2      |
| 24 | Gene 4731419 | ENSMUSG000 (RIKEN cDNA 4731419I09 gene)                               | XR_168404.1, XR_ |
| 24 | Gene Adam15  | Adam15, meta a disintegrin and metallopeptidase domain 15 (meta       | NM_001037722.2   |
| 17 | Gene Zbtb7b  | Zfp67, Zbtb7b, zinc finger and BTB domain containing 7B               | NM_009565.4      |
| 17 | Gene Gm1541  | ENSMUSG000 (predicted gene 15417)                                     | NR_040403.1, NR_ |
| 17 | Gene Lenep   | Lep503, AU018 lens epithelial protein                                 | NM_020517.4      |
| 33 | Gene Shc1    | Shc, p66, Shc1, src homology 2 domain-containing transforming pro     | NM_011368.5, NM  |
| 33 | Gene Pygo2   | Pygo2, 119000 pygopus 2                                               | NM_026869.2      |
| 33 | Gene Pbxip1  | 4732463H20Ri pre B cell leukemia transcription factor interacting p   | NM_146131.2      |
| 20 | Gene Kcnn3   | Kcnn3, SK3, M potassium intermediate/small conductance calcium        | NM_080466.2      |
| 22 | Gene Adar    | Adar, AV24245 adenosine deaminase, RNA-specific                       | NM_001146296.1   |
| 36 | Gene Chrnb2  | C030030P04Ri cholinergic receptor, nicotinic, beta polypeptide 2 (r   | NM_009602.4      |
| 36 | Gene Ube2q1  | Ube2q, PRO30 ubiquitin-conjugating enzyme E2Q (putative) 1            | NM_027315.4      |
| 17 | Gene She     | She, MGC1304 src homology 2 domain-containing transforming pro        | NM_172530.3      |
| 25 | Gene Il6ra   | CD126, IL-6R, I interleukin 6 receptor, alpha                         | NM_010559.2      |
| 19 | Gene Atp8b2  | Id, Atp8b2 ATPase, class I, type 8B, member 2                         | NM_001081182.2   |
| 34 | Gene Mir190b | Mir190b, Mirn microRNA 190b                                           | NR_030543.1      |
| 34 | Gene Tpm3    | Tpm-5, MGC16 tropomyosin 3, gamma                                     | NM_001253738.1   |
| 27 | Gene Crtc2   | Crtc2, mTORC2 CREB regulated transcription coactivator 2              | NM_028881.2      |
| 27 | Gene Dennd4l | mKIAA0476, B DENN/MADD domain containing 4B                           | NM_201407.3      |
| 37 | Gene Slc27a3 | FATP3, Acsvl3, solute carrier family 27 (fatty acid transporter), men | NM_011988.2      |
| 37 | Gene Ints3   | Ints3, C77668 integrator complex subunit 3                            | NM_145540.3, NM  |
| 35 | Gene Npr1    | Npr1, GC-A, Pr natriuretic peptide receptor 1                         | NM_008727.5      |
| 38 | Gene Ilf2    | Ilf2, TEG-267, I interleukin enhancer binding factor 2                | NM_026374.3      |
| 38 | Gene Snapin  | Bloc1s7, AA40 SNAP-associated protein                                 | NM_133854.3      |
| 38 | Gene Chtop   | C81330, Srag, I chromatin target of PRMT1                             | NM_023215.5      |
| 24 | Gene S100a1  | AI266795, S10 S100 calcium binding protein A1                         | NM_011309.3      |
| 24 | Gene S100a13 | S100a13 S100 calcium binding protein A13                              | NM_009113.4      |
| 20 | Gene C2cd4d  | C2cd4d, Gm65 C2 calcium-dependent domain containing 4D                | NM_001136117.1   |
| 20 | Gene Rorc    | Nr1f3, TOR, RC RAR-related orphan receptor gamma                      | NM_011281.2      |
| 27 | Gene Snx27   | ESTM45, R754 sorting nexin family member 27                           | NM_029721.1, NM  |
| 25 | Gene Pogz    | AU044539, 95: pogo transposable element with ZNF domain               | NM_172683.3, NM  |
| 25 | Gene Psmb4   | Pros-27, Psmb4                                                        | NM_008945.3      |
| 30 | Gene Pi4kb   | Pi4kb, AA4378 phosphatidylinositol 4-kinase, catalytic, beta polype   | NM_175356.2      |
| 20 | Gene Pip5k1a | Pipk5b, Pipk5a phosphatidylinositol-4-phosphate 5-kinase, type 1 a    | NM_008847.2      |
| 20 | Gene Vps72   | YL-1, Vps72, T vacuolar protein sorting 72 (yeast)                    | NM_009336.2      |
| 30 | Gene Sema6c  | Semay, mKIAA sema domain, transmembrane domain (TM), and cy           | NM_011351.1      |

|    |               |                                                                     |                  |
|----|---------------|---------------------------------------------------------------------|------------------|
| 23 | Gene Gabpb2   | Gabpb2, AV05 GA repeat binding protein, beta 2                      | NM_172512.2, NM  |
| 32 | Gene Mllt11   | Zfp692, AI8395 myeloid/lymphoid or mixed-lineage leukemia (tritho   | NM_019914.4      |
| 32 | Gene Cdc42se  | AW558204, Cc CDC42 small effector 1                                 | NM_001038708.2   |
| 32 | Gene Gm128    | Ment, Gm128, pmis1                                                  | NM_001024841.3   |
| 25 | Gene Anxa9    | Anxa9, 231006 annexin A9                                            | NM_023628.2, NM  |
| 25 | Gene 6330562  | 6330562C20Ri RIKEN cDNA 6330562C20 gene                             | XR_140571.1, XR_ |
| 25 | Gene Cers2    | Cers2, 0610013117Rik, AI225939, Lass2, TRH3, CerS2                  | NM_029789.1      |
| 25 | Gene Setdb1   | ESET, MGC906 SET domain, bifurcated 1                               | NM_018877.3, NM  |
| 27 | Gene Gm4349   | Gm4349 SET domain, bifurcated 1 pseudogene                          | NR_033637.1      |
| 27 | Gene Arnt     | Hif1b, Arnt, mIaryl hydrocarbon receptor nuclear translocator       | NM_001037737.2   |
| 37 | Gene Mcl1     | Mcl1, Mcl-1, A myeloid cell leukemia sequence 1                     | NM_008562.3      |
| 20 | Gene Anp32e   | CPD1, LANP-L, acidic (leucine-rich) nuclear phosphoprotein 32 fami  | NM_023210.4, NM  |
| 22 | Gene Gm9054   | Gm9054, EG66 predicted gene 9054                                    | NR_045872.1      |
| 22 | Gene Plekho1  | Plekho1, 2810 pleckstrin homology domain containing, family O me    | NM_023320.2      |
| 22 | Gene Vps45    | AI462172, mV1 vacuolar protein sorting 45 (yeast)                   | NM_013841.3      |
| 27 | Gene Otud7b   | 4930463P07Ri OTU domain containing 7B                               | NM_001025614.1   |
| 21 | Gene Hist2h2a | H2a-613a, Hist histone cluster 2, H2ab                              | NM_178213.3      |
| 21 | Gene Hist2h2a | Hist2h2ac, H2a histone cluster 2, H2ac                              | NM_175662.1      |
| 21 | Gene Hist2h2b | H2b-613, T256 histone cluster 2, H2be                               | NM_178214.3      |
| 23 | Gene Gm1544   | Gm15441, ENS predicted gene 15441                                   | NR_040409.1      |
| 23 | Gene Txnip    | THIF, 1200008 thioredoxin interacting protein                       | NM_001009935.2   |
| 38 | Gene Lix1l    | Lix1l, D130027 Lix1-like                                            | NM_001163170.1   |
| 38 | Gene Rbm8a    | Rbm8a, 23100 RNA binding motif protein 8a                           | NM_025875.2, NM  |
| 38 | Gene Pex11b   | PEX11beta, Pe peroxisomal biogenesis factor 11 beta                 | NM_011069.3, NM  |
| 38 | Gene Itga10   | A630048L14, I integrin, alpha 10                                    | NM_001081053.1   |
| 23 | Gene Ankrd35  | 4732436F15Ri ankyrin repeat domain 35                               | NM_001081139.1   |
| 23 | Gene Pias3    | Pias3l, MGC27 protein inhibitor of activated STAT 3                 | NM_146135.2, NM  |
| 23 | Gene Nudt17   | Nudt17, 2410C nudix (nucleoside diphosphate linked moiety X)-type   | NM_030094.1, NM  |
| 25 | Gene Polr3c   | RPC3, RPC62, I polymerase (RNA) III (DNA directed) polypeptide C    | NM_028925.1      |
| 25 | Gene Rnf115   | Zfp364, 26100 ring finger protein 115                               | NM_026406.3      |
| 22 | Gene Gpr89    | Gpr89a, SH12C G protein-coupled receptor 89                         | NM_026229.4      |
| 21 | Gene Acp6     | mPACPL1, AUC acid phosphatase 6, lysophosphatidic                   | NM_019800.4      |
| 20 | Gene Chd1l    | Chd1l, Alc1, 44 chromodomain helicase DNA binding protein 1-like    | NM_026539.2      |
| 26 | Gene Pde4dip  | C87016, D130C phosphodiesterase 4D interacting protein (myomeg      | NM_177145.3, NM  |
| 29 | Gene Sec22b   | AA517334, Sec SEC22 vesicle trafficking protein homolog B (S. cerev | NM_011342.4      |
| 30 | Gene Notch2   | N2, AI853703, Notch2                                                | NM_010928.2      |
| 26 | Gene Zfp697   | AI467503, 943 zinc finger protein 697                               | NM_172863.4      |
| 20 | Gene Wars2    | AI413375, Wai tryptophanyl tRNA synthetase 2 (mitochondrial)        | NM_027462.4      |
| 27 | Gene Wdr3     | AW546279, DCWD repeat domain 3                                      | NM_175552.4      |
| 27 | Gene Gdap2    | Gdap2, D3Ert ganglioside-induced differentiation-associated-prote   | NM_010269.2      |
| 18 | Gene Fam46c   | AI449797, 493 family with sequence similarity 46, member C          | NM_001142952.1   |
| 18 | Gene Gm1247   | OTTMUSG000I predicted gene 12474                                    | XR_168411.1, XR_ |
| 27 | Gene Man1a2   | AI528764, AI4: mannosidase, alpha, class 1A, member 2               | NM_010763.2      |
| 22 | Gene Ptgfrn   | 4833445A08Ri prostaglandin F2 receptor negative regulator           | NM_011197.3      |
| 32 | Gene Atp1a1   | Atp1a1, BC01C ATPase, Na+/K+ transporting, alpha 1 polypeptide      | NM_144900.2      |
| 25 | Gene Slc22a15 | 2610034P21Ri solute carrier family 22 (organic anion/cation transp  | NM_001039371.2   |
| 21 | Gene Vangl1   | Vangl1, Stbm, vang-like 1 (van gogh, Drosophila)                    | NM_177545.4, NM  |

|    |                   |                                                                                    |                 |
|----|-------------------|------------------------------------------------------------------------------------|-----------------|
| 34 | Gene Sike1        | Sikeb, AI83986 suppressor of IKBKE 1                                               | NM_025679.3     |
| 28 | Gene Ampd1        | Ampd-1, AI553 adenosine monophosphate deaminase 1                                  | NM_001033303.2  |
| 27 | Gene Trim33       | ectodermin, Ti tripartite motif-containing 33                                      | NM_053170.2, NM |
| 19 | Gene Hipk1        | 1110062K04Ri homeodomain interacting protein kinase 1                              | NM_010432.2     |
| 21 | Gene Dclre1b      | mSNM1B, Apo DNA cross-link repair 1B, PSO2 homolog (S. cerevisiae)                 | NM_001025312.1, |
| 21 | Gene Gm1547       | OTTMUSG000i predicted gene 15471                                                   | NR_040412.1     |
| 21 | Gene Ap4b1        | Ap4b1, AV004 adaptor-related protein complex AP-4, beta 1                          | NM_026193.2, NM |
| 33 | Gene Ptpn22       | 70zpep, PEP, P protein tyrosine phosphatase, non-receptor type 22                  | NM_008979.1     |
| 35 | Gene Rsbn1        | Rsbn, C230004 rosbin, round spermatid basic protein 1                              | NM_172684.2     |
| 35 | Gene A130049      | A130049A11Ri RIKEN cDNA A130049A11 gene                                            | NR_030676.1     |
| 35 | Gene Phtf1        | AU041898, Ph putative homeodomain transcription factor 1                           | NM_013629.2, NM |
| 24 | Gene Magi3        | Magi3, 473249 membrane associated guanylate kinase, WW and PDZ domain containing 3 | NM_001159354.1  |
| 28 | Gene Lrig2        | BB096938, Lrig leucine-rich repeats and immunoglobulin-like domains 2              | NM_001025067.1  |
| 25 | Gene Slc16a1      | AL022710, Mc solute carrier family 16 (monocarboxylic acid transporters) member 1  | NM_009196.3     |
| 19 | Gene Ppm1j        | 2310008J22Ri protein phosphatase 1J                                                | NM_027982.2     |
| 19 | Gene Rhoc         | AI324259, Arh ras homolog gene family, member C                                    | NM_007484.2     |
| 31 | Gene Mov10        | Mov10, Mov-1 Moloney leukemia virus 10                                             | NM_008619.2, NM |
| 31 | Gene Capza1       | CAPZ, CAZ1, C capping protein (actin filament) muscle Z-line, alpha 1              | NM_009797.2     |
| 27 | Gene St7l         | MGC130399, S suppression of tumorigenicity 7-like                                  | NM_001253702.1  |
| 19 | Gene Wnt2b        | Wnt2b, Wnt13 wingless related MMTV integration site 2b                             | NM_009520.3     |
| 21 | Gene 1700095      | 1700095B22Ri RIKEN cDNA 1700095B22 gene                                            | NR_040759.1     |
| 21 | Gene Kcnd3        | Kv4.3, Kcnd3, I potassium voltage-gated channel, Shal-related family 3             | NM_019931.1, NM |
| 38 | Gene Ddx20        | MGC159174, c DEAD (Asp-Glu-Ala-Asp) box polypeptide 20                             | NM_017397.3     |
| 21 | Gene Cept1        | BB118941, 993 choline/ethanolamine phosphotransferase 1                            | NM_133869.3     |
| 21 | Gene Dram2        | 2010305N14Ri DNA-damage regulated autophagy modulator 2                            | NM_026013.2, NM |
| 19 | Gene Kcna3        | Mk-3, Kca1-3, potassium voltage-gated channel, shaker-related subfamily 3          | NM_008418.2     |
| 19 | Gene AI50443      | A230102G19, expressed sequence AI504432                                            | NR_033498.1     |
| 31 | Gene Lamtor5      | Lamtor5, 1110 late endosomal/lysosomal adaptor, MAPK and MTOC organizer 5          | NM_026774.2     |
| 22 | Gene Kcnc4        | Kv3.4, Kcr2-4, potassium voltage gated channel, Shaw-related subfamily 4           | NM_145922.2     |
| 22 | Gene Slc6a17      | Slc6a17, D130i solute carrier family 6 (neurotransmitter transporters) member 17   | NM_172271.2     |
| 29 | Gene Strip1       | 6530401O14Ri striatin interacting protein 1                                        | NM_153563.2     |
| 22 | Gene Csf1         | Csfm, op, Csf1, colony stimulating factor 1 (macrophage)                           | NM_007778.4, NM |
| 34 | Gene Ampd2        | AI552571, 120 adenosine monophosphate deaminase 2                                  | NM_028779.4     |
| 34 | Gene Gnat2        | AW490837, Tc guanine nucleotide binding protein, alpha transducin 2                | NM_008141.2     |
| 26 | Gene 1700013      | 1700013F07Rik                                                                      | NM_029314.1     |
| 26 | Gene Scarna2      | MBII-382, Scar small Cajal body-specific RNA 2                                     | NR_028538.1     |
| 26 | Gene Tmem16f      | 2010200O16Ri transmembrane protein 167B                                            | NM_026198.2     |
| 28 | Gene Taf13        | 2010309N11Ri TAF13 RNA polymerase II, TATA box binding protein 13                  | NM_025444.2     |
| 28 | Gene Wdr47        | 1810073M12RWD repeat domain 47                                                     | NM_181400.3     |
| 28 | Gene Clcc1        | Mclc, Clcc1 chloride channel CLIC-like 1                                           | NM_001177770.1  |
| 32 | Gene Stxbp3a      | MGC86097, St syntaxin binding protein 3A                                           | NM_011504.1     |
| 32 | Gene Prpf38b      | Prpf38b, AU01 PRP38 pre-mRNA processing factor 38 (yeast) domain 2                 | NM_025845.2     |
| 18 | Gene LOC101055747 | uncharacterized LOC101055747                                                       | XM_003946122.1, |
| 18 | Gene Henmt1       | MGC117573, 4HEN1 methyltransferase homolog 1 (Arabidopsis)                         | NM_001078646.1  |
| 25 | Gene Fam102l      | B430201A12Ri family with sequence similarity 102, member B                         | NM_001163567.1  |
| 22 | Gene Vav3         | AA986410, Idd vav 3 oncogene                                                       | NM_146139.2, NM |
| 47 | Gene Prmt6        | BB233495, AW protein arginine N-methyltransferase 6                                | NM_178891.4, NR |



|    |              |              |                                                                |                 |
|----|--------------|--------------|----------------------------------------------------------------|-----------------|
| 21 | Gene Slc30a7 | 1810059J10Ri | solute carrier family 30 (zinc transporter), member 7          | NM_023214.7     |
| 21 | Gene Extl2   | AW146439,    | 3C exostosins (multiple)-like 2                                | NM_021388.4, NM |
| 21 | Gene Gpr88   | Gpr88,       | AW061 G-protein coupled receptor 88                            | NM_022427.2     |
| 34 | Gene Cdc14a  | CDC14a1,     | A83 CDC14 cell division cycle 14A                              | NM_001080818.2, |
| 26 | Gene Trmt13  | A930028L21Ri | tRNA methyltransferase 13                                      | NM_030016.2     |
| 26 | Gene Sass6   | 2810453L12Ri | spindle assembly 6 homolog (C. elegans)                        | NM_028349.2     |
| 25 | Gene Hiat1   | MGC144858,   | H hippocampus abundant gene transcript 1                       | NM_008246.2     |
| 25 | Gene Slc35a3 | 2310050P13Ri | solute carrier family 35 (UDP-N-acetylglucosamine (1           | NM_144902.3     |
| 27 | Gene Cnn3    | Cnn3,        | C85854, calponin 3, acidic                                     | NM_028044.2     |
| 30 | Gene F3      | AA409063,    | F3 coagulation factor III                                      | NM_010171.3     |
| 25 | Gene Abcd3   | PMP70,       | AI313 ATP-binding cassette, sub-family D (ALD), member 3       | NM_008991.2     |
| 16 | Gene Arhgap2 | Parg1,       | C76601 Rho GTPase activating protein 29                        | NM_172525.2     |
| 22 | Gene Gclm    | Gclr,        | AI64939: glutamate-cysteine ligase, modifier subunit           | NM_008129.3     |
| 30 | Gene Dnttip2 | AA408582,    | AU deoxynucleotidyltransferase, terminal, interacting p        | NM_153806.1     |
| 30 | Gene Mir760  | mmu-mir-760, | microRNA 760                                                   | NR_030439.1     |
| 26 | Gene Fnbp1l  | AW548221,    | Fn formin binding protein 1-like                               | NM_153118.2, NM |
| 24 | Gene Pde5a   | Pde5,        | Pde5a, C phosphodiesterase 5A, cGMP-specific                   | NM_153422.2     |
| 37 | Gene Usp53   | AA939927,    | Sp ubiquitin specific peptidase 53                             | NM_133857.3     |
| 20 | Gene Prss12  | Bssp-3,      | Prss12, protease, serine, 12 neurotrypsin (motopsin)           | NM_008939.2     |
| 20 | Gene Tram1l1 | MGC38777,    | A translocation associated membrane protein 1-like 1           | NM_146140.3     |
| 33 | Gene Camk2d  | 2810011D23Ri | calcium/calmodulin-dependent protein kinase II, del            | NM_023813.3, NM |
| 30 | Gene Larp7   | Larp7,       | D3Wsu: La ribonucleoprotein domain family, member 7            | NM_138593.2     |
| 30 | Gene Mir302b | Mir302b,     | Mir microRNA 302b                                              | NR_030403.1     |
| 30 | Gene Mir302c | Mir302c,     | Mir microRNA 302c                                              | NR_030404.1     |
| 30 | Gene Mir302a | Mir302a,     | Mir microRNA 302a                                              | NR_029653.1     |
| 30 | Gene Mir302d | Mir302d,     | Mir microRNA 302d                                              | NR_030405.1     |
| 30 | Gene Mir367  | Mir367,      | Mir3 microRNA 367                                              | NR_030268.1     |
| 30 | Gene 4930422 | 4930422G04Ri | RIKEN cDNA 4930422G04 gene                                     | NM_197997.2     |
| 23 | Gene Ap1ar   | C78909,      | Gadki adaptor-related protein complex 1 associated regul       | NM_145964.2     |
| 20 | Gene Pitx2   | Brx1b,       | Pitx2, P paired-like homeodomain transcription factor 2        | NM_011098.3, NM |
| 22 | Gene Elov16  | LCE,         | FAE, Elov1 ELOVL family member 6, elongation of long chain fai | NM_130450.2     |
| 57 | Gene Rrh     | Rrh          | retinal pigment epithelium derived rhodopsin homo              | NM_009102.3     |
| 57 | Gene Gar1    | Gar1,        | AA4098: GAR1 ribonucleoprotein homolog (yeast)                 | NM_026578.3     |
| 57 | Gene Cfi     | Cfi          | complement component factor i                                  | NM_007686.2     |
| 50 | Gene Rpl34   | 1100001I22Ri | ribosomal protein L34                                          | NM_026724.1, NM |
| 15 | Gene Lef1    | 3000002B05,  | Lymphoid enhancer binding factor 1                             | NM_010703.3     |
| 26 | Gene Hadh    | AW742602,    | A hydroxyacyl-Coenzyme A dehydrogenase                         | NM_008212.3     |
| 20 | Gene Dkk2    | Dkk2         | dickkopf homolog 2 (Xenopus laevis)                            | NM_020265.4     |
| 20 | Gene Aimp1   | EMAPII,      | Scye1, aminoacyl tRNA synthetase complex-interacting mu        | NM_007926.2     |
| 20 | Gene Tbck    | C030007I09Ri | TBC1 domain containing kinase                                  | NM_001163455.1  |
| 27 | Gene Gstcd   | Gstcd,       | MGC74 glutathione S-transferase, C-terminal domain contai      | NM_026231.2     |
| 27 | Gene Ints12  | Ints12,      | 493052 integrator complex subunit 12                           | NM_027927.3     |
| 28 | Gene Cenpe   | AU019344,    | 31: centromere protein E                                       | NM_173762.4     |
| 30 | Gene 4930539 | 4930539J05Ri | RIKEN cDNA 4930539J05 gene                                     | NR_030689.1     |
| 30 | Gene Ube2d3  | 9430029A22Ri | , AA414951, 1100001F19Ri, Ube2d3                               | NM_025356.4     |
| 22 | Gene Manba   | B930014J03Ri | mannosidase, beta A, lysosomal                                 | NM_027288.3     |
| 17 | Gene Nfkb1   | NF-KB1,      | p50, N nuclear factor of kappa light polypeptide gene enha     | NM_008689.2     |

|    |                   |                |                                                       |                  |
|----|-------------------|----------------|-------------------------------------------------------|------------------|
| 42 | Gene Ppp3ca       | Caln, AI841391 | protein phosphatase 3, catalytic subunit, alpha isofo | NM_008913.4      |
| 24 | Gene LOC101055801 |                | uncharacterized LOC101055801                          | XM_003945377.1   |
| 24 | Gene H2afz        | H2A.Z, H2afz   | H2A histone family, member Z                          | NM_016750.2      |
| 24 | Gene Dnajb14      | 5730496F10Ri   | DnaJ (Hsp40) homolog, subfamily B, member 14          | NM_001033155.1   |
| 25 | Gene Metap1       | KIAA0094, Me   | methionyl aminopeptidase 1                            | NM_175224.4      |
| 24 | Gene Eif4e        | MGC103177, E   | eukaryotic translation initiation factor 4E           | NM_007917.3      |
| 24 | Gene Mir1956      | mmu-mir-1956   | microRNA 1956                                         | NR_035481.1      |
| 22 | Gene Tspan5       | 2810455A09Ri   | tetraspanin 5                                         | NM_019571.4      |
| 27 | Gene Rap1gds      | GDS1, Rap1gd   | RAP1, GTP-GDP dissociation stimulator 1               | NM_001040690.1   |
| 21 | Gene Gm1568       | OTTMUSG0001    | predicted gene 15688                                  | XM_003946125.1,  |
| 21 | Gene Unc5c        | B130051O18R    | unc-5 homolog C (C. elegans)                          | NM_009472.3      |
| 32 | Gene Gtf2b        | MGC6859, Gtf   | general transcription factor IIB                      | NM_145546.1      |
| 20 | Gene Pkn2         | Pkn2, Prkcl2,  | P protein kinase N2                                   | NM_178654.4      |
| 20 | Gene 9530052      | 9530052C20Ri   | RIKEN cDNA 9530052C20 gene                            | XR_107559.1, XR_ |
| 22 | Gene Lmo4         | A730077C12Ri   | LIM domain only 4                                     | NM_010723.3, NM  |
| 27 | Gene Hs2st1       | AW214369, Hs   | heparan sulfate 2-O-sulfotransferase 1                | NM_011828.3      |
| 27 | Gene Sep15        | Sep15, 943001  | selenoprotein                                         | NM_053102.2      |
| 33 | Gene Znhit6       | 2410019A14Ri   | zinc finger, HIT type 6                               | NM_001081094.1   |
| 26 | Gene Cyr61        | Cyr61, AI3250  | cysteine rich protein 61                              | NM_010516.2      |
| 26 | Gene Gm1750       | Gm17501        | predicted gene, 17501                                 | XR_107563.1, XR_ |
| 26 | Gene Ddah1        | Ddah1, AW05    | dimethylarginine dimethylaminohydrolase 1             | NM_026993.3      |
| 31 | Gene Bcl10        | CIPER, ME10,   | B cell leukemia/lymphoma 10                           | NM_009740.1      |
| 27 | Gene 2410004      | 2410004B18Ri   | RIKEN cDNA 2410004B18 gene                            | NM_025555.4      |
| 29 | Gene Syde2        | Syde2, C43001  | synapse defective 1, Rho GTPase, homolog 2 (C. eleg   | NM_001166064.1   |
| 19 | Gene Spata1       | 4921536121Ri   | spermatogenesis associated 1                          | NM_027617.3      |
| 19 | Gene Gng5         | G(y)5, Gng5    | guanine nucleotide binding protein (G protein), gam   | NM_010318.2      |
| 19 | Gene Rpf1         | Bxdc5, Rpf1,   | M ribosome production factor 1 homolog (S. cerevisiae | NM_027371.3, NM  |
| 15 | Gene Ttl7         | 1110049N09Ri   | tubulin tyrosine ligase-like family, member 7         | NM_027594.1      |
| 38 | Gene Dnajb4       | 1700029A20Ri   | DnaJ (Hsp40) homolog, subfamily B, member 4           | NM_027287.3, NM  |
| 38 | Gene Fubp1        | Fubp4, Fubp,   | F far upstream element (FUSE) binding protein 1       | NM_057172.3      |
| 21 | Gene Fam73a       | Fam73a, A930   | family with sequence similarity 73, member A          | NM_174868.4, NM  |
| 31 | Gene Usp33        | Vdu1, 983016   | ubiquitin specific peptidase 33                       | NM_001076676.2   |
| 31 | Gene Zzz3         | AA408566, AV   | zinc finger, ZZ domain containing 3                   | NM_198416.2, NM  |
| 36 | Gene Tyw3         | Tyw3, 523040   | (tRNA-yW synthesizing protein 3 homolog (S. cerevis   | NM_001168358.1   |
| 36 | Gene Cryz         | Cryz, Sez9     | crystallin, zeta                                      | NM_009968.3      |
| 24 | Gene Ptger3       | Ptger3, EP3, P | prostaglandin E receptor 3 (subtype EP3)              | NM_011196.2      |
| 24 | Gene Ankrd13      | AU022220, An   | ankyrin repeat domain 13c                             | NM_001013806.1   |
| 25 | Gene Srsf11       | 2610019N13Ri   | serine/arginine-rich splicing factor 11               | NM_001093753.1   |
| 25 | Gene Lrrc40       | 2610040E16Ri   | leucine rich repeat containing 40                     | NM_024194.5      |
| 28 | Gene Rps20        | 4632426K06Ri   | ribosomal protein S20                                 | NM_026147.5      |
| 32 | Gene Plag1        | Plag1          |                                                       | NM_019969.3      |
| 32 | Gene Chchd7       | 1810049H20Ri   | coiled-coil-helix-coiled-coil-helix domain containing | NM_001190322.1,  |
| 29 | Gene Impad1       | AL022796, gP   | inositol monophosphatase domain containing 1          | NM_177730.3      |
| 31 | Gene Sdcbp        | Sdcbp, MDA-9,  | syndecan binding protein                              | NM_016807.2, NM  |
| 24 | Gene Rab2a        | Rab2a, Rab2,   | RAB2A, member RAS oncogene family                     | NM_021518.3      |
| 27 | Gene Asph         | AI848629, 231  | aspartate-beta-hydroxylase                            | NM_133723.2, NM  |
| 18 | Gene Gdf6         | BMP13, Gdf6,   | growth differentiation factor 6                       | NM_013526.1      |

|    |                          |                                                                                |                  |
|----|--------------------------|--------------------------------------------------------------------------------|------------------|
| 31 | Gene 26103012610301B20Ri | RIKEN cDNA 2610301B20 gene                                                     | NM_026005.3      |
| 20 | Gene Plekhf2             | 1110070J07Ri pleckstrin homology domain containing, family F (wi               | NM_175175.4      |
| 28 | Gene Ndufaf6             | 2310030N02Ri NADH dehydrogenase (ubiquinone) complex I, asser                  | NM_001085493.1   |
| 38 | Gene Trp53inç            | SIP18, SIP, Trp transformation related protein 53 inducible nuclear            | NM_021897.3, NM  |
| 44 | Gene Ccne2               | Ccne2                                                                          | NM_001037134.1   |
| 44 | Gene Ints8               | 2810013E07Ri integrator complex subunit 8                                      | NM_178112.5, NM  |
| 18 | Gene Dpy19l4             | Dpy19l4, Narg dpy-19-like 4 (C. elegans)                                       | NM_001081201.1   |
| 18 | Gene Esrp1               | Rbm35a, 2210 epithelial splicing regulatory protein 1                          | NM_194055.2      |
| 34 | Gene Pdp1                | Gm1024, Ppm pyruvate dehydrogenase phosphatase catalytic subur                 | NM_001033453.3   |
| 34 | Gene 1700123             | 1700123M08R RIKEN cDNA 1700123M08 gene                                         | NR_040577.1      |
| 26 | Gene Fam92a              | Fam92a, 6720 family with sequence similarity 92, member A                      | NM_026558.4      |
| 19 | Gene Runx1t1             | ETO, MTG8, Ct runt-related transcription factor 1; translocated to,            | NM_009822.2, NM  |
| 37 | Gene Tmem64              | AI790744, 963 transmembrane protein 64                                         | NM_181401.3      |
| 29 | Gene Nbn                 | Nbs1, Nbn nibrin                                                               | NM_013752.3      |
| 24 | Gene Osgin2              | C230027H09Ri oxidative stress induced growth inhibitor family mer              | NM_145950.4      |
| 25 | Gene Ripk2               | D4Bwg0615e, receptor (TNFRSF)-interacting serine-threonine kina                | NM_138952.3      |
| 25 | Gene A530072             | A530072M11R RIKEN cDNA gene A530072M11                                         | NR_045765.2      |
| 25 | Gene Wwp1                | Tiul1, Wwp1, ε WW domain containing E3 ubiquitin protein ligase 1              | NM_177327.4      |
| 17 | Gene 4930480             | 4930480G23Ri RIKEN cDNA 4930480G23 gene                                        | NR_040768.1      |
| 17 | Gene Ttpa                | Ttpa, alpha-TT tocopherol (alpha) transfer protein                             | NM_015767.3      |
| 19 | Gene Nkain3              | E130310K16Ri Na <sup>+</sup> /K <sup>+</sup> transporting ATPase interacting 3 | NM_172987.2      |
| 24 | Gene Prdm13              | Prdm13 PR domain containing 13                                                 | NM_001080771.1   |
| 21 | Gene Ccnc                | Ccnc, AI45100 cyclin C                                                         | NM_016746.3, NM  |
| 23 | Gene Fbxl4               | FBL4, 4732456 F-box and leucine-rich repeat protein 4                          | NM_172988.3      |
| 24 | Gene Mms22l              | F730047E07Ri MMS22-like, DNA repair protein                                    | NM_199467.2      |
| 23 | Gene Ndufaf4             | Ndufaf4, AW2 NADH dehydrogenase (ubiquinone) 1 alpha subcom                    | NM_026742.4      |
| 16 | Gene Fut9                | AI746471, mFl fucosyltransferase 9                                             | NM_010243.3      |
| 21 | Gene Manea               | 4932703L02Ri mannosidase, endo-alpha                                           | NM_172865.2      |
| 25 | Gene Epha7               | Hek11, Ehk3, E Eph receptor A7                                                 | NM_010141.3, NM  |
| 22 | Gene Map3k7              | B430101B05, ( mitogen-activated protein kinase kinase kinase 7                 | NM_009316.1, NM  |
| 22 | Gene LOC101056168        | uncharacterized LOC101056168                                                   | XM_003945750.1,  |
| 22 | Gene D130062             | D130062J21Ri RIKEN cDNA D130062J21 gene                                        | XR_140638.1, XR_ |
| 24 | Gene Casp8ap             | AA387232, FL caspase 8 associated protein 2                                    | NM_011997.2, NM  |
| 24 | Gene Mdn1                | Mdn1, Gm135 midasin homolog (yeast)                                            | NM_001081392.1   |
| 28 | Gene Rragd               | AI467523, Rraç Ras-related GTP binding D                                       | NM_027491.2      |
| 28 | Gene 4933421             | 4933421O10Ri RIKEN cDNA 4933421O10 gene                                        | NR_036602.1      |
| 28 | Gene Ube2j1              | NCUBE-1, Ncu ubiquitin-conjugating enzyme E2J 1                                | NM_019586.3      |
| 22 | Gene Srsf12              | B830039L16, Srrp, Sfrs13b, Srsf13b, Srsf12                                     | NM_177774.4      |
| 38 | Gene Pnrc1               | PRR2, B4-2, Pn proline-rich nuclear receptor coactivator 1                     | NM_001033225.2   |
| 26 | Gene Cnr1                | Cnr1, CB1, CB1 cannabinoid receptor 1 (brain)                                  | NM_007726.3      |
| 38 | Gene Orc3                | Orc3, Orc3l origin recognition complex, subunit 3                              | NM_015824.4, NM  |
| 38 | Gene Rars2               | 1500002I10Ri arginyl-tRNA synthetase 2, mitochondrial                          | NM_181406.3      |
| 21 | Gene Slc35a1             | AI314851, Slc3 solute carrier family 35 (CMP-sialic acid transporter)          | NM_011895.3      |
| 29 | Gene Zfp292              | 5730450D02Ri zinc finger protein 292                                           | NM_013889.2      |
| 30 | Gene Topors              | TP53BPL, AW1 topoisomerase I binding, arginine/serine-rich                     | NM_134097.3      |
| 30 | Gene 2010003             | 2010003O02Ri RIKEN cDNA 2010003O02 gene                                        | NR_045265.1      |
| 30 | Gene Ndufb6              | Gm137, Ndufb NADH dehydrogenase (ubiquinone) 1 beta subcomp                    | NM_001033305.2   |

|    |              |                                                                    |                     |                  |
|----|--------------|--------------------------------------------------------------------|---------------------|------------------|
| 41 | Gene Gm6297  | Gm6297                                                             | predicted gene 6297 | XR_107582.1, XR_ |
| 41 | Gene Dnaja1  | Hsj2, Nedd7, D DnaJ (Hsp40) homolog, subfamily A, member 1         |                     | NM_001164671.1   |
| 41 | Gene Mir207  | mmu-mir-207, microRNA 207                                          |                     | NR_029594.1      |
| 27 | Gene Smu1    | 2600001O03Rismu-1 suppressor of mec-8 and unc-52 homolog (C.       |                     | NM_021535.4      |
| 30 | Gene B4galt1 | Ggtb2, Ggtb, A UDP-Gal:betaGlcNAc beta 1,4- galactosyltransferase  |                     | NM_022305.3      |
| 30 | Gene Mir5123 | mu-mir-5123, microRNA 5123                                         |                     | NR_039584.1      |
| 44 | Gene Chmp5   | AW545668, 2210412K09Rik, Chmp5                                     |                     | NM_029814.1      |
| 44 | Gene Nfx1    | NFX.1, TEG-42, nuclear transcription factor, X-box binding 1       |                     | NM_023739.3      |
| 32 | Gene Dcaf12  | 5830424K06Ri DDB1 and CUL4 associated factor 12                    |                     | NM_026893.3      |
| 21 | Gene Kif24   | Kif24, 4933425 kinesin family member 24                            |                     | NM_024241.2      |
| 21 | Gene Nudt2   | AA939917, Nu nudix (nucleoside diphosphate linked moiety X)-type   |                     | NM_025539.2      |
| 23 | Gene AI46413 | Gm762, MGC1 expressed sequence AI464131                            |                     | NM_001085515.2   |
| 23 | Gene 1110017 | Smrp1, smrp1, RIKEN cDNA 1110017D15 gene                           |                     | NM_028624.1, NM  |
| 16 | Gene Fam219  | 2310028H24Ri family with sequence similarity 219, member A         |                     | NM_001159583.1   |
| 16 | Gene Dnaic1  | Dnai1, BB1246 dynein, axonemal, intermediate chain 1               |                     | NM_175138.4      |
| 20 | Gene Rpp25l  | Rppl25, AW98 ribonuclease P/MRP 25 subunit-like                    |                     | NM_027278.3      |
| 20 | Gene Dctn3   | Dctn3, p24 dynactin 3                                              |                     | NM_016890.4, NM  |
| 20 | Gene Arid3c  | OTTMUSG000i AT rich interactive domain 3C (BRIGHT-like)            |                     | NM_001017362.2,  |
| 26 | Gene Galt    | AW553376, G galactose-1-phosphate uridyl transferase               |                     | NM_016658.2      |
| 26 | Gene Il11ra1 | NR1, GP130, Il interleukin 11 receptor, alpha chain 1              |                     | NM_010549.3, NM  |
| 33 | Gene Vcp     | p97, p97/VCP, valosin containing protein                           |                     | NM_009503.4      |
| 33 | Gene Fancg   | AU041407, Xrc Fanconi anemia, complementation group G              |                     | NM_053081.2, NM  |
| 28 | Gene Unc13b  | Unc13h1, Mun unc-13 homolog B (C. elegans)                         |                     | NM_001081413.1   |
| 21 | Gene Atp8b5  | 4930417M19RATPase, class I, type 8B, member 5                      |                     | NM_177195.3      |
| 21 | Gene Rusc2   | AI840675, Rus RUN and SH3 domain containing 2                      |                     | NM_001037709.1   |
| 19 | Gene Fam166l | 4833436C18Ri family with sequence similarity 166, member B         |                     | NM_177377.5, NM  |
| 20 | Gene Car9    | CAIX, MN/CA9 carbonic anhydrase 9                                  |                     | NM_139305.2      |
| 20 | Gene Tpm2    | Trop-2, Tpm-2, tropomyosin 2, beta                                 |                     | NM_009416.3      |
| 21 | Gene Tln1    | Tln, Tln1 talin 1                                                  |                     | NM_011602.5      |
| 21 | Gene Creb3   | AW538053, C cAMP responsive element binding protein 3              |                     | NM_013497.3      |
| 28 | Gene Gba2    | F630034E04, G glucosidase beta 2                                   |                     | NM_172692.3      |
| 28 | Gene Rgp1    | mKIAA0258, 1: RGP1 retrograde golgi transport homolog (S. cerevis  |                     | NM_172866.3      |
| 28 | Gene Msmpl   | Psmpl, OTTMU microseminoprotein, prostate associated               |                     | NM_001099314.1   |
| 28 | Gene Gm1247  | OTTMUSG000i predicted gene 12472                                   |                     | XR_168658.1, XR_ |
| 24 | Gene Npr2    | mNPR-B, GC-B natriuretic peptide receptor 2                        |                     | NM_173788.3      |
| 21 | Gene Spag8   | Spag8, MH-SP, sperm associated antigen 8                           |                     | NM_001007463.1   |
| 21 | Gene Hint2   | Hint2, 119000i histidine triad nucleotide binding protein 2        |                     | NM_026871.1      |
| 21 | Gene Fam221l | RP23-191F22.1 family with sequence similarity 221, member B        |                     | NM_175517.3      |
| 21 | Gene Gm1248  | Gm12481, OTTsmall EDRK-rich factor 2 pseudogene                    |                     |                  |
| 22 | Gene Reck    | MGC169689, S reversion-inducing-cysteine-rich protein with kazal r |                     | NM_016678.2      |
| 31 | Gene Clta    | Clta, AV02655i clathrin, light polypeptide (Lca)                   |                     | NM_001080384.1   |
| 33 | Gene Gne     | Gne, NM, Uae: glucosamine (UDP-N-acetyl)-2-epimerase/N-acetyl      |                     | NM_015828.3, NM  |
| 22 | Gene Rnf38   | 1700065B19Ri ring finger protein 38                                |                     | NM_175201.5, NM  |
| 22 | Gene Pax5    | Pax5, KLP, EBB paired box gene 5                                   |                     | NM_008782.2      |
| 22 | Gene 5730488 | 5730488B01Ri RIKEN cDNA 5730488B01 gene                            |                     | XM_003945753.1,  |
| 28 | Gene Gm1246  | Gm12463, OTTaurora kinase C pseudogene                             |                     |                  |
| 28 | Gene Zcchc7  | D4Wsu132e, Z zinc finger, CCHC domain containing 7                 |                     | NM_138590.4      |

|    |      |              |                                                                      |                  |
|----|------|--------------|----------------------------------------------------------------------|------------------|
| 28 | Gene | Grhpr        | 1110059D05Ri glyoxylate reductase/hydroxypyruvate reductase          | NM_080289.1      |
| 28 | Gene | Zbtb5        | mKIAA0354, Zinc finger and BTB domain containing 5                   | NM_173399.3, NM  |
| 26 | Gene | 1700055      | 1700055D18Ri RIKEN cDNA 1700055D18 gene                              | XR_035212.1, XR_ |
| 26 | Gene | Polr1e       | 53kDa, D0300: polymerase (RNA) I polypeptide E                       | NM_022811.2      |
| 16 | Gene | Fbxo10       | Fbxo10, Gm63 F-box protein 10                                        | NM_001024142.1   |
| 36 | Gene | Tomm5        | Tom5, Tomm5 translocase of outer mitochondrial membrane 5 hor        | NM_001099675.1,  |
| 31 | Gene | Trmt10b      | 2610042J10Ri tRNA methyltransferase 10B                              | NM_027266.4      |
| 31 | Gene | Exosc3       | Rrp40, 231000 exosome component 3                                    | NM_025513.3      |
| 30 | Gene | Dcaf10       | Wdr32, Dcaf10 (DDB1 and CUL4 associated factor 10                    | NM_153167.2      |
| 26 | Gene | Shb          | Shb, BC028832 src homology 2 domain-containing transforming pro      | NM_001033306.1   |
| 36 | Gene | Tstd2        | 3010020C06, Thiolsulfate sulfurtransferase (rhodanese)-like domai    | NM_173033.3      |
| 36 | Gene | Ncbp1        | AW538051, A nuclear cap binding protein subunit 1                    | NM_001033201.3   |
| 22 | Gene | Xpa          | Xpac, AI57386: xeroderma pigmentosum, complementation group /        | NM_011728.2      |
| 27 | Gene | Anp32b       | Ssp29, Anp32: acidic (leucine-rich) nuclear phosphoprotein 32 fami   | NM_130889.2      |
| 30 | Gene | Nans         | Sas, 4632418E N-acetylneuraminic acid synthase (sialic acid syntha   | NM_053179.3      |
| 30 | Gene | Trim14       | 5830400N10Ri tripartite motif-containing 14                          | NM_029077.3      |
| 22 | Gene | Tbc1d2       | Gm1037, PARI TBC1 domain family, member 2                            | NM_198664.3      |
| 21 | Gene | Col15a1      | Col15a1                                                              | NM_009928.3      |
| 23 | Gene | Tgfbr1       | Alk-5, TbetaR-I transforming growth factor, beta receptor I          | NM_009370.2      |
| 30 | Gene | Alg2         | ALPG2, 11100: asparagine-linked glycosylation 2 (alpha-1,3-manno     | NM_019998.3      |
| 30 | Gene | Sec61b       | AI326121, 119 Sec61 beta subunit                                     | NM_024171.2      |
| 24 | Gene | LOC101055654 | uncharacterized LOC101055654                                         | XM_003946131.1,  |
| 24 | Gene | Nr4a3        | CHN, TEC, Nor nuclear receptor subfamily 4, group A, member 3        | NM_015743.2      |
| 28 | Gene | Tex10        | Tex10, MGC11 testis expressed gene 10                                | NM_172304.3      |
| 23 | Gene | Tmeff1       | A830033E11, T transmembrane protein with EGF-like and two follis     | NM_021436.2      |
| 21 | Gene | Tmem24       | Tmem246, 281 transmembrane protein 246                               | NM_025944.3      |
| 24 | Gene | 2700081      | 2700081L22Ri RIKEN cDNA 2700081L22 gene                              | NR_045175.1      |
| 24 | Gene | Smc2         | SMC-2, Smc2, structural maintenance of chromosomes 2                 | NM_008017.3      |
| 19 | Gene | Abca1        | Abca1, Abc1 ATP-binding cassette, sub-family A (ABC1), member        | NM_013454.3      |
| 18 | Gene | Slc44a1      | AW547365, CT solute carrier family 44, member 1                      | NM_133891.3, NM  |
| 18 | Gene | Fsd1l        | Fsd1l, Csdufd1 fibronectin type III and SPRY domain containing 1-lik | NM_176966.4, NM  |
| 17 | Gene | Fktn         | Fktn, D830030 fukutin                                                | NM_139309.4      |
| 21 | Gene | Tmem38       | D4Ert89e, 16 transmembrane protein 38B                               | NM_028053.2      |
| 21 | Gene | Gm8364       | EG666920, Grr predicted gene 8364                                    | XR_168828.1, XR_ |
| 21 | Gene | Zfp462       | Zfp462, 94300 zinc finger protein 462                                | NM_172867.3      |
| 25 | Gene | Rad23b       | 0610007D13Ri RAD23b homolog (S. cerevisiae)                          | NM_009011.4      |
| 26 | Gene | Klf4         | Klf4, Gklf, Zie, Kruppel-like factor 4 (gut)                         | NM_010637.3      |
| 33 | Gene | Ikbkap       | Ikbkap, 60304: inhibitor of kappa light polypeptide enhancer in B ce | NM_026079.3      |
| 33 | Gene | BC02659      | Fam206a, BC026590                                                    | NM_001081420.1   |
| 33 | Gene | Cttnl1       | Catnal1, AW54 catenin (cadherin associated protein), alpha-like 1    | NM_018761.3      |
| 27 | Gene | Tmem24       | D730040F13Rik, A630051L19Rik, AI957324, Tmem245                      | NM_175518.5      |
| 20 | Gene | Ptpn3        | Ptpn3, PTP-H1 protein tyrosine phosphatase, non-receptor type 3      | NM_011207.2      |
| 23 | Gene | Gm1253       | OTTMUSG000i predicted gene 12538                                     | XM_908951.4, XM  |
| 31 | Gene | Lpar1        | vzg-1, AI32630 lysophosphatidic acid receptor 1                      | NM_010336.2, NM  |
| 31 | Gene | AI31418      | mKIAA0368, A expressed sequence AI314180                             | NM_172381.2      |
| 33 | Gene | Dnajc25      | Dnajc25, 2010 DnaJ (Hsp40) homolog, subfamily C, member 25           | NM_001033165.3   |
| 28 | Gene | Ptbp3        | AI462022, AA4 polypyrimidine tract binding protein 3                 | NM_178164.3, NM  |

|    |              |                                                                    |                  |
|----|--------------|--------------------------------------------------------------------|------------------|
| 30 | Gene Hsd12   | Hsd12, 261020 hydroxysteroid dehydrogenase like 2                  | NM_024255.3      |
| 30 | Gene E130308 | E130308A19Ri RIKEN cDNA E130308A19 gene                            | NM_001015681.1   |
| 30 | Gene Snx30   | Snx30, MGC10 sorting nexin family member 30                        | NM_172468.2      |
| 29 | Gene Alad    | Lv, Alad aminolevulinate, delta-, dehydratase                      | NM_008525.3      |
| 29 | Gene Pole3   | Pole3, 181003 polymerase (DNA directed), epsilon 3 (p17 subunit)   | NM_021498.2      |
| 29 | Gene 493343C | 4933430I17Rik RIKEN cDNA 4933430I17 gene                           | NM_177607.3      |
| 19 | Gene Rgs3    | C2PA-RGS3, P1 regulator of G-protein signaling 3                   | NM_001081650.1   |
| 27 | Gene Col27a1 | 5730512J02Rik collagen, type XXVII, alpha 1                        | NM_025685.3      |
| 35 | Gene Whrn    | AW122018, A1 whirlin                                               | NM_001008791.1   |
| 26 | Gene Atp6v1g | AA960677, VA ATPase, H+ transporting, lysosomal V1 subunit G1      | NM_024173.2      |
| 18 | Gene Pappa   | IGFBP-4ase, P2 pregnancy-associated plasma protein A               | NM_021362.1      |
| 27 | Gene Megf9   | 4933405H16Rik multiple EGF-like-domains 9                          | NM_172694.2      |
| 33 | Gene Tle1    | Estm14, Grg1, transducin-like enhancer of split 1, homolog of Dros | NM_011599.4      |
| 33 | Gene C630043 | AI851307, C63 RIKEN cDNA C630043F03 gene                           | NR_027923.1      |
| 36 | Gene Kdm4c   | 2410141F18Rik lysine (K)-specific demethylase 4C                   | NM_001172095.1   |
| 22 | Gene Ptprd   | 3000002J10Rik protein tyrosine phosphatase, receptor type, D       | NM_011211.2, NM  |
| 20 | Gene Lurap1l | D4Bwg0951e, bM350F23.1, AV175137, AV077978, WI-13707, 1110         | NM_026821.5      |
| 31 | Gene Nfib    | 6720429L07Rik nuclear factor I/B                                   | NM_008687.5, NM  |
| 28 | Gene Snapc3  | 4930558A07Rik small nuclear RNA activating complex, polypeptide 3  | NM_029949.3      |
| 30 | Gene Psip1   | Dfs70, Ledgfa, PC4 and SFRS1 interacting protein 1                 | NM_133948.4      |
| 25 | Gene Ccdc171 | A330015D16Rik coiled-coil domain containing 171                    | NM_001081012.1   |
| 22 | Gene Bnc2    | 8430420F16Rik basонуclin 2                                         | NM_172870.4      |
| 23 | Gene Cntlh   | Cntlh, AI44809 centlein, centrosomal protein                       | NM_177385.3, NM  |
| 40 | Gene Rraga   | RAGA, FIP-1, A Ras-related GTP binding A                           | NM_178376.3      |
| 40 | Gene Haus6   | 6230416J20Rik HAUS augmin-like complex, subunit 6                  | NM_173400.2      |
| 56 | Gene Dennd4c | 1700065A05Rik DENN/MADD domain containing 4C                       | NM_001081014.1   |
| 56 | Gene Rps6    | Rps6, S6R, MG ribosomal protein S6                                 | NM_009096.3      |
| 22 | Gene Acer2   | CRG-L1, Acer2, alkaline ceramidase 2                               | NM_139306.2      |
| 17 | Gene Slc24a2 | 2810021B17Rik solute carrier family 24 (sodium/potassium/calcium   | NM_172426.2, NM  |
| 18 | Gene Mllt3   | 3830408D16Rik myeloid/lymphoid or mixed-lineage leukemia (trithc   | NM_029931.2, NM  |
| 31 | Gene Kih19   | Kih19, 8030469P05, mKIAA1354, C530050O22Rik, KIAA1354, ENSM        | NM_172871.2      |
| 28 | Gene Mtap    | 1300019I21Rik methylthioadenosine phosphorylase                    | NM_024433.2      |
| 24 | Gene Cdkn2a  | Arf, p16INK4a, cyclin-dependent kinase inhibitor 2A                | NM_009877.2, NM  |
| 19 | Gene Elavl2  | Hub, Elavl2, m ELAV (embryonic lethal, abnormal vision, Drosophila | NM_010486.2, NM  |
| 21 | Gene Tusc1   | TSG-9, Tusc1, 2 tumor suppressor candidate 1                       | NM_026954.1      |
| 27 | Gene Caap1   | Caap1, 5830433M19Rik, AI536248, CAAP                               | NM_026368.2      |
| 27 | Gene Plaa    | AU018445, 24 phospholipase A2, activating protein                  | NM_172695.2      |
| 22 | Gene Gm1265  | OTTMUSG000I predicted gene 12657                                   | NM_001081019.1   |
| 32 | Gene Mym1    | C130067A03Rik myb-like, SWIRM and MPN domains 1                    | NM_177239.2      |
| 59 | Gene Gm1270  | OTTMUSG000I predicted gene 12703                                   | XR_168412.1, XR_ |
| 59 | Gene Jun     | Jun, AP-1, Junc Jun oncogene                                       | NM_010591.2      |
| 20 | Gene Nfia    | 9430022M17R nuclear factor I/A                                     | NM_001122952.1   |
| 27 | Gene Inadl   | Inadl, MGC176 InaD-like (Drosophila)                               | NM_001005787.1   |
| 26 | Gene Usp1    | MGC25559, U2 ubiquitin specific peptidase 1                        | NM_146144.3      |
| 36 | Gene Atg4c   | Atg4cl, Atg4c, 1 autophagy related 4C, cysteine peptidase          | NM_175029.3, NM  |
| 21 | Gene Itgb3bp | Itgb3bp, 49304 integrin beta 3 binding protein (beta3-endonexin)   | NM_026348.3      |
| 21 | Gene Efcab7  | mKIAA1799, N EF-hand calcium binding domain 7                      | NM_145549.1      |

|    |              |               |                                                                               |                  |
|----|--------------|---------------|-------------------------------------------------------------------------------|------------------|
| 17 | Gene Ror1    | mRor1, 28104I | receptor tyrosine kinase-like orphan receptor 1                               | NM_013845.4      |
| 36 | Gene Cachd1  | B430218L07Ri  | cache domain containing 1                                                     | NM_198037.1      |
| 14 | Gene Raver2  | A430091O22R   | ribonucleoprotein, PTB-binding 2                                              | NM_183024.1      |
| 39 | Gene Jak1    | MGC37919,     | Ja Janus kinase 1                                                             | NM_146145.2      |
| 24 | Gene E130102 | E130102H24Ri  | RIKEN cDNA E130102H24 gene                                                    | NR_040708.1      |
| 24 | Gene Mir101a | miR-101,      | Mir1 microRNA 101a                                                            | NR_029537.1      |
| 24 | Gene 0610043 | 0610043K17Ri  | RIKEN cDNA 0610043K17 gene                                                    | NR_040640.1      |
| 24 | Gene Dnajc6  | Dnajc6,       | 28100.DnaJ (Hsp40) homolog, subfamily C, member 6                             | NM_198412.2, NM  |
| 24 | Gene Leprot  | Obrgrp,       | OB-RG leptin receptor overlapping transcript                                  | NM_175036.4      |
| 21 | Gene Wdr78   | MGC31722,     | W WD repeat domain 78                                                         | NM_146254.4      |
| 21 | Gene Mier1   | 4933425I22Ri  | mesoderm induction early response 1 homolog (Xer NM_001039081.1               |                  |
| 31 | Gene Slc35d1 | AI834976,     | KIA solute carrier family 35 (UDP-glucuronic acid/UDP-N NM_177732.4           |                  |
| 33 | Gene Ppap2b  | Ppap2b,       | 2610C phosphatidic acid phosphatase type 2B                                   | NM_080555.2      |
| 32 | Gene Usp24   | B130021E18,   | 2 ubiquitin specific peptidase 24                                             | NM_183225.2      |
| 26 | Gene Dhcr24  | Dhcr24,       | 23100 24-dehydrocholesterol reductase                                         | NM_053272.2      |
| 27 | Gene Ssbp3   | AW551939,     | 57 single-stranded DNA binding protein 3                                      | NM_023672.2, NM  |
| 30 | Gene Tceanc2 | 2210010B22Ri  | transcription elongation factor A (SII) N-terminal anc NM_025617.2            |                  |
| 30 | Gene Tmem59  | Tmem59,       | 111C transmembrane protein 59                                                 | NM_029565.3      |
| 31 | Gene Yip1    | Yip1,         | C030002 Yip1 domain family, member 1                                          | NM_145550.3, NM  |
| 31 | Gene Tmem48  | 2810475A17Ri  | transmembrane protein 48                                                      | NM_028355.3      |
| 21 | Gene Glis1   | Glis1,        | Gli5, GliI GLIS family zinc finger 1                                          | NM_147221.2      |
| 20 | Gene Lrp8    | Lrp8,         | AI848122 low density lipoprotein receptor-related protein 8, a NM_001080926.1 |                  |
| 20 | Gene B230314 | B230314M03Ri  | RIKEN cDNA B230314M03 gene                                                    | XR_107608.1, XR_ |
| 19 | Gene Zyg11a  | Zyg11a,       | BC022 zyg-11 family member A, cell cycle regulator                            | NM_001167936.1   |
| 22 | Gene Zyg11b  | FLJ13456,     | 111(zyg-II family member B, cell cycle regulator                              | NM_001033634.3   |
| 24 | Gene Orc1    | MmORC1,       | Orc1I, AA545195, Orc1                                                         | NM_011015.2      |
| 24 | Gene Cc2d1b  | A830039B04Ri  | coiled-coil and C2 domain containing 1B                                       | NM_177045.3      |
| 34 | Gene 3110021 | 3110021N24Ri  | RIKEN cDNA 3110021N24 gene                                                    | NM_001254730.1   |
| 47 | Gene Txndc12 | 0610040B21Ri  | thioredoxin domain containing 12 (endoplasmic reti NM_025334.3                |                  |
| 47 | Gene Kti12   | Kti12,        | AU0147 KTI12 homolog, chromatin associated (S. cerevisiae) NM_029571.2        |                  |
| 29 | Gene Osbp19  | Osbp19,       | 26000 oxysterol binding protein-like 9                                        | NM_001134791.2   |
| 25 | Gene Eps15   | 2410112D09Ri  | epidermal growth factor receptor pathway substrat NM_007943.3, NM             |                  |
| 30 | Gene 9630013 | 9630013D21Ri  | RIKEN cDNA 9630013D21 gene                                                    | XR_107609.1, XR_ |
| 30 | Gene Cdkn2c  | p18,          | C77269, I cyclin-dependent kinase inhibitor 2C (p18, inhibits C NM_007671.2   |                  |
| 30 | Gene Faf1    | AA408698,     | Dff Fas-associated factor 1                                                   | NM_007983.2      |
| 21 | Gene Elavl4  | Hud,          | Elav, Elav ELAV (embryonic lethal, abnormal vision, Drosophila NM_001038698.1 |                  |
| 27 | Gene Spata6  | 1700062C23Ri  | spermatogenesis associated 6                                                  | NM_026470.3      |
| 22 | Gene Trabd2b | OTTMUSG000I   | TraB domain containing 2B                                                     | NM_001085549.1   |
| 21 | Gene Foxd2   | Foxd2,        | AI4267 forkhead box D2                                                        | NM_008593.3      |
| 21 | Gene 9130206 | 9130206I24Ri  | RIKEN cDNA 9130206I24 gene                                                    | NR_030721.1      |
| 19 | Gene Foxe3   | FREAC8,       | Foxe3 forkhead box E3                                                         | NM_015758.2      |
| 33 | Gene Cmpk1   | 0610011D08Ri  | cytidine monophosphate (UMP-CMP) kinase 1                                     | NM_025647.3      |
| 28 | Gene Stil    | Sil,          | Stil Scl/Tal1 interrupting locus                                              | NM_009185.3      |
| 21 | Gene Tal1    | tal-1,        | bHLHa17T cell acute lymphocytic leukemia 1                                    | NM_011527.2      |
| 25 | Gene Efcab14 | KIAA0494,     | 473 EF-hand calcium binding domain 14                                         | NM_172698.2      |
| 20 | Gene Faah    | AW412498,     | Fa fatty acid amide hydrolase                                                 | NM_010173.4      |
| 30 | Gene Uqcrh   | 2310021J10Ri  | ubiquinol-cytochrome c reductase hinge protein                                | NM_025641.3      |

|    |               |                                                                                     |                 |
|----|---------------|-------------------------------------------------------------------------------------|-----------------|
| 30 | Gene Lrrc41   | MUF1, D73002 leucine rich repeat containing 41                                      | NM_153521.1     |
| 25 | Gene Lurap1   | 1520402A15Rik, Lurap1, Lrp35a                                                       | NM_026547.1     |
| 25 | Gene Pomgnt1  | Pomgnt1, O61 (protein O-linked mannose beta1,2-N-acetylglucosaminyltransferase 1)   | NM_029786.2, NM |
| 25 | Gene Tmem69   | MGC118424, T transmembrane protein 69                                               | NM_177670.4     |
| 25 | Gene Gbbp1l1  | 5330440M15R GC-rich promoter binding protein 1-like 1                               | NM_029868.2     |
| 37 | Gene Nasp     | AI317140, 503 nuclear autoantigenic sperm protein (histone-binding protein)         | NM_016777.3, NM |
| 37 | Gene Akr1a1   | Akr1a1, Akr1a4, 2610201A18Rik                                                       | NM_021473.3     |
| 38 | Gene AV051173 | AV051173 expressed sequence AV051173                                                | NR_040442.1     |
| 38 | Gene Prdx1    | TPxA, prx1, Prx peroxiredoxin 1                                                     | NM_011034.4     |
| 26 | Gene Zswim5   | mKIAA1511, A zinc finger SWIM-type containing 5                                     | NM_001029912.2  |
| 26 | Gene Urod     | Urod, Uro-d, A uroporphyrinogen decarboxylase                                       | NM_009478.3     |
| 26 | Gene Hectd3   | AI467540, 170 HECT domain containing 3                                              | NM_175244.3     |
| 29 | Gene Eif2b3   | Eif2b3, 11900C eukaryotic translation initiation factor 2B, subunit 3               | NM_001111277.1  |
| 24 | Gene Ptch2    | ptc2, Ptch2 patched homolog 2                                                       | NM_008958.2     |
| 17 | Gene Btdb19   | Btdb19, 95300 BTB (POZ) domain containing 19                                        | NR_024078.1     |
| 17 | Gene Tctex1d4 | 4833401D15Ri Tctex1 domain containing 4                                             | NM_175030.2     |
| 17 | Gene Plk3     | Plk3, PRK, Fnk, Cnk                                                                 | NM_013807.2     |
| 75 | Gene Gm1301   | OTTMUSG000I polymerase (RNA) II (DNA directed) polypeptide L pseudogene             |                 |
| 75 | Gene Rps8     | Rps8, MGC107 ribosomal protein S8                                                   | NM_009098.2     |
| 75 | Gene Snord38  | MBII-329, Snor small nucleolar RNA, C/D box 38A                                     | NR_028524.1     |
| 75 | Gene Snord55  | Snord55 small nucleolar RNA, C/D box 55                                             | NR_030704.1     |
| 75 | Gene Kif2c    | MGC11883, ES kinesin family member 2C                                               | NM_134471.4     |
| 15 | Gene Rnf220   | 4931406I20Rik ring finger protein 220                                               | NM_025739.2     |
| 29 | Gene Eri3     | Prnpip1, Eri3, Ixoribonuclease 3                                                    | NM_080469.3     |
| 46 | Gene Slc6a9   | Glyt1, Slc6a9, (solute carrier family 6 (neurotransmitter transporter) member 9)    | NM_008135.4     |
| 39 | Gene B4galt2  | Ggtb2, B4galt2 UDP-Gal:betaGlcNAc beta 1,4- galactosyltransferase                   | NM_001253381.1  |
| 39 | Gene Atp6v0b  | Atp6f, VMA16, ATPase, H+ transporting, lysosomal V0 subunit B                       | NM_033617.3     |
| 39 | Gene Dph2     | Dph2I2, 91300 DPH2 homolog (S. cerevisiae)                                          | NM_026344.3     |
| 39 | Gene lpo13    | MGC18698, Ka importin 13                                                            | NM_146152.3     |
| 24 | Gene St3gal3  | ST3N, St3gal3, ST3 beta-galactoside alpha-2,3-sialyltransferase 3                   | NM_009176.4, NM |
| 24 | Gene Kdm4a    | mKIAA0677, D lysine (K)-specific demethylase 4A                                     | NM_172382.2, NM |
| 31 | Gene Ptpfr    | LAR, AA59103I protein tyrosine phosphatase, receptor type, F                        | NM_011213.2     |
| 33 | Gene Szt2     | MGC69654, Szt2, 6430407N22, BC059842, ENSMUSG00000058432                            | NM_198170.4     |
| 33 | Gene Med8     | AB041805, 22: mediator of RNA polymerase II transcription, subunit 8                | NM_020000.2, NM |
| 34 | Gene Elovl1   | Elovl1, Ssc1, B1 elongation of very long chain fatty acids (FEN1/Elo2, FEN1)        | NM_019422.2, NM |
| 34 | Gene Cdc20    | C87100, 2310C cell division cycle 20                                                | NM_023223.2     |
| 34 | Gene Mpl      | TPO-R, Mpl, c- myeloproliferative leukemia virus oncogene                           | NM_010823.2, NM |
| 28 | Gene Slc2a1   | Glut-1, Glut1, (solute carrier family 2 (facilitated glucose transporter) member 1) | NM_011400.3     |
| 17 | Gene Ermap    | AA409279, Err erythroblast membrane-associated protein                              | NM_013848.2     |
| 17 | Gene Ccdc23   | Ccdc23, AI851: coiled-coil domain containing 23                                     | NM_024462.2, NM |
| 17 | Gene 4930538  | 4930538K18Rik                                                                       | NM_029198.3     |
| 38 | Gene AU022252 | AU022252, AI4 expressed sequence AU022252                                           | NM_001012400.2  |
| 38 | Gene Lepre1   | 2410024C15Ri leprecan 1                                                             | NM_019783.2, NM |
| 19 | Gene Cldn19   | Cldn19, MGC1. claudin 19                                                            | NM_001038590.1  |
| 28 | Gene Ybx1     | YB-1, 1700102 Y box protein 1                                                       | NM_011732.2     |
| 31 | Gene Ppih     | 1100001J08RiI peptidyl prolyl isomerase H                                           | NM_028677.4, NM |
| 32 | Gene Ccdc30   | 1700111D19Ri coiled-coil domain containing 30                                       | NM_001270446.1  |



|    |                   |                                                                     |                  |
|----|-------------------|---------------------------------------------------------------------|------------------|
| 32 | Gene Ppcs         | Ppcs, AI79043: phosphopantothencysteine synthetase                  | NM_026494.3      |
| 32 | Gene Zmynd1       | Zmynd12, AI41: zinc finger, MYND domain containing 12               | NM_001014900.2   |
| 30 | Gene AA4153       | MGC73851, A: expressed sequence AA415398                            | NM_001004178.1   |
| 30 | Gene Foxj3        | Fhd6, mKIAA1: forkhead box J3                                       | NM_172699.2      |
| 27 | Gene LOC101055647 | uncharacterized LOC101055647                                        | XM_003945386.1,  |
| 27 | Gene Foxo6        | Foxo6                                                               | NM_194060.1      |
| 28 | Gene Scmh1        | AI315320, Scm sex comb on midleg homolog 1                          | NM_013883.2, NM  |
| 26 | Gene Ctps         | Ctps1, Ctps cytidine 5'-triphosphate synthase                       | NM_016748.2      |
| 23 | Gene Cited4       | AW742964, Cii Cbp/p300-interacting transactivator, with Glu/Asp-r   | NM_019563.2      |
| 30 | Gene Nfyc         | Nfyc                                                                | NM_001048168.1,  |
| 18 | Gene Exo5         | 3110037116Rik exonuclease 5                                         | NM_028457.2, NM  |
| 18 | Gene Zfp69        | Gm1029, Krab. zinc finger protein 69                                | NM_001005788.3   |
| 29 | Gene Smap2        | Smap1l, 18100 stromal membrane-associated GTPase-activating pr      | NM_133716.3      |
| 21 | Gene Mycl1        | L-myc, AW536 v-myc myelocytomatosis viral oncogene homolog 1,       | NM_008506.2      |
| 38 | Gene Trit1        | MOD5, Trit1, A: tRNA isopentenyltransferase 1                       | NM_025873.2      |
| 35 | Gene Macf1        | mACF7, MACF, microtubule-actin crosslinking factor 1                | NM_001199136.1   |
| 35 | Gene D830031      | mKIAA0754, KIRIKEN cDNA D830031N03 gene                             | NM_001167918.1   |
| 32 | Gene Akirin1      | Akirin1, 63304 akirin 1                                             | NM_023423.3      |
| 23 | Gene Gm1057       | Gm10572, ENS predicted gene 10572                                   | XR_140667.1, XR_ |
| 27 | Gene Mycbp        | Mycbp, AW74: c-myc binding protein                                  | NM_019660.3      |
| 27 | Gene Rragc        | RAGC, Gtr2, YC Ras-related GTP binding C                            | NM_017475.2      |
| 22 | Gene Pou3f1       | Oct6, Otf-6, Sc POU domain, class 3, transcription factor 1         | NM_011141.2      |
| 25 | Gene Utp11l       | Utp11l, 27000: UTP11-like, U3 small nucleolar ribonucleoprotein, (y | NM_026031.3      |
| 25 | Gene Fhl3         | SLIM2, Fhl3                                                         | NM_010213.3      |
| 23 | Gene Sf3a3        | Sf3a3, 60kDa, , splicing factor 3a, subunit 3                       | NM_029157.3      |
| 31 | Gene Inpp5b       | Inpp5b, 75kDa inositol polyphosphate-5-phosphatase B                | NM_008385.3      |
| 31 | Gene Mtf1         | Thyls, MTF-1, I metal response element binding transcription factor | NM_008636.4      |
| 31 | Gene 1110065      | C530005M16R RIKEN cDNA 1110065P20 gene                              | NM_001142727.1   |
| 31 | Gene Yrdc         | MGC38336, A: yrdC domain containing (E.coli)                        | NM_153566.2      |
| 31 | Gene Maneal       | Gm50, Maneal mannosidase, endo-alpha-like                           | NM_001007573.2   |
| 30 | Gene Cdca8        | DasraB, BOR, I cell division cycle associated 8                     | NM_026560.4      |
| 30 | Gene 9930104      | MGC107426, S RIKEN cDNA 9930104L06 gene                             | NM_177573.3      |
| 33 | Gene Dnali1       | Dnali1, AW04: dynein, axonemal, light intermediate polypeptide 1    | NM_175223.4      |
| 33 | Gene Snip1        | Snip1, 241013: Smad nuclear interacting protein 1                   | NM_175246.4      |
| 32 | Gene Csf3r        | Cd114, Csfgr, C colony stimulating factor 3 receptor (granulocyte)  | NM_001252651.1   |
| 32 | Gene Mrps15       | 2410002B11Ri mitochondrial ribosomal protein S15                    | NM_025544.2      |
| 19 | Gene Oscp1        | 1810007P19Ri organic solute carrier partner 1                       | NM_172701.2      |
| 30 | Gene Lsm10        | Lsm10                                                               | NM_138721.2, NM  |
| 42 | Gene Stk40        | Stk40, 231000: serine/threonine kinase 40                           | NM_028800.3, NM  |
| 42 | Gene Eva1b        | 2610027C15Ri eva-1 homolog B (C. elegans)                           | NM_172145.3      |
| 42 | Gene Sh3d21       | AU019788, 17: SH3 domain containing 21                              | NM_001162533.1   |
| 28 | Gene Thrp3        | MGC116673, I thyroid hormone receptor associated protein 3          | NM_146153.3      |
| 32 | Gene Map7d1       | MGC28498, B: MAP7 domain containing 1                               | NM_144941.3, NM  |
| 32 | Gene Trappc3      | AI835942, Tra: trafficking protein particle complex 3               | NM_013718.2      |
| 41 | Gene Col8a2       | MGC90765, AI collagen, type VIII, alpha 2                           | NM_199473.2      |
| 41 | Gene Adprhl2      | Adprhl2, AI83: ADP-ribosylhydrolase like 2                          | NM_133883.2      |
| 41 | Gene Tekt2        | Tekt2, tektin-t, tektin 2                                           | NM_011902.2      |

|    |                   |                                                                      |                  |
|----|-------------------|----------------------------------------------------------------------|------------------|
| 41 | Gene Gm1294       | Gm12945, ENS predicted gene 12945                                    | XR_107629.2, XR_ |
| 30 | Gene Ago3         | AW048688, C1 argonaute RISC catalytic subunit 3                      | NM_153402.2      |
| 30 | Gene Ago1         | Ago1, Eif2c1 argonaute RISC catalytic subunit 1                      | NM_153403.2      |
| 21 | Gene 5730409      | AI849033, 753 RIKEN cDNA 5730409E04Rik gene                          | NM_001013755.3,  |
| 24 | Gene Tfp2e        | AP-2e, Tcfap2e transcription factor AP-2, epsilon                    | NM_198960.2      |
| 27 | Gene Ncdn         | MMS10-AE, m neurochondrin                                            | NM_011986.4      |
| 27 | Gene AU0403       | AU040320, A7 expressed sequence AU040320                             | NM_133886.2, NM  |
| 28 | Gene Sfpq         | 2810416M14R splicing factor proline/glutamine rich (polypyrimidin    | NM_023603.3, NR  |
| 32 | Gene Dlgap3       | BC058433, DA discs, large (Drosophila) homolog-associated protein    | NM_198618.4      |
| 32 | Gene Smim12       | Smim12, BC00 small integral membrane protein 12                      | NM_030252.2      |
| 16 | Gene Phc2         | D4Ert810e, D polyhomeotic-like 2 (Drosophila)                        | NM_018774.4, NM  |
| 42 | Gene Trim62       | 6330414G21Ri tripartite motif-containing 62                          | NM_178110.2      |
| 25 | Gene Adc          | Azi2, AZIN2, Ac arginine decarboxylase                               | NM_172875.2      |
| 36 | Gene 1700086      | 1700086P04Ri RIKEN cDNA 1700086P04 gene                              | XR_107631.1, XR_ |
| 36 | Gene Rnf19b       | 4930555L03Ri ring finger protein 19B                                 | NM_029219.1      |
| 33 | Gene S100pbp      | S100pbp, AI85 S100P binding protein                                  | NM_029036.2      |
| 33 | Gene Yars         | AL024047, Yar tyrosyl-tRNA synthetase                                | NM_134151.4      |
| 30 | Gene Rbbp4        | mRbAp48, RbL retinoblastoma binding protein 4                        | NM_009030.3      |
| 30 | Gene Zbtb8os      | 2010001H09Ri zinc finger and BTB domain containing 8 opposite st     | NM_025970.3      |
| 26 | Gene Marcks1      | F52, Macs2, M MARCKS-like 1                                          | NM_010807.4      |
| 26 | Gene Hdac1        | MGC102534, Histone deacetylase 1                                     | NM_008228.2      |
| 33 | Gene Eif3i        | Eif3s2, 36kDa, eukaryotic translation initiation factor 3, subunit I | NM_018799.2      |
| 33 | Gene Tmem23       | 1500002D11Rik, 4933407D05Rik, 2510006D16Rik, Tmem234                 | NM_029748.2      |
| 33 | Gene Dcdc2b       | Gm1366, Gm1 doublecortin domain containing 2b                        | NM_001195730.1   |
| 30 | Gene Kpna6        | IPOA7, NPI-2, I karyopherin (importin) alpha 6                       | NM_008468.4      |
| 30 | Gene Tmem39       | Tmem39b, BC transmembrane protein 39b                                | NM_199305.1      |
| 37 | Gene Khdrbs1      | Khdrbs1, p62, KH domain containing, RNA binding, signal transduc     | NM_011317.4, NR  |
| 32 | Gene Ptp4a2       | Ptp4a2, Prl-2, I protein tyrosine phosphatase 4a2                    | NM_008974.4, NM  |
| 18 | Gene Spocd1       | Spocd1, OTTM SPOC domain containing 1                                | XM_003085429.3,  |
| 18 | Gene 1700003      | 1700003M07R RIKEN cDNA 1700003M07 gene                               | NR_040647.1, NR_ |
| 21 | Gene Bai2         | Bai2                                                                 | NM_001199696.1   |
| 19 | Gene Col16a1      | 2700007F12Ri collagen, type XVI, alpha 1                             | NM_028266.5      |
| 31 | Gene Pum1         | Pumm, AA517, pumilio 1 (Drosophila)                                  | NM_030722.2, NM  |
| 28 | Gene Ptpu         | R-PTP-U, Ptpu, protein tyrosine phosphatase, receptor type, U        | NM_011214.2, NM  |
| 28 | Gene Mecr         | Mecr, AI19583 mitochondrial trans-2-enoyl-CoA reductase              | NM_025297.2      |
| 30 | Gene Gm1299       | OTTMUSG000I predicted gene 12992                                     | XR_107635.1, XR_ |
| 30 | Gene Tmem20       | EG623230, Tm transmembrane protein 200B                              | NM_001201367.1   |
| 30 | Gene Epb4.1       | KIAA4056, D4E erythrocyte protein band 4.1                           | NM_183428.3, NM  |
| 22 | Gene LOC101056016 | uncharacterized LOC101056016                                         | XM_003945765.1,  |
| 34 | Gene Ythdf2       | Ythdf2, NY-REI YTH domain family 2                                   | NM_145393.4      |
| 34 | Gene Rps15a       | Gm13253, OTT ribosomal protein S15A, pseudogene 4                    | NR_036572.1      |
| 34 | Gene Gmeb1        | AI481278, Gm glucocorticoid modulatory element binding protein       | NM_001122992.1   |
| 27 | Gene Rcc1         | Chc1, AI32687 regulator of chromosome condensation 1                 | NM_001197082.1   |
| 23 | Gene Snhg3        | Snhg3, U17HG small nucleolar RNA host gene (non-protein coding)      | NR_003270.2      |
| 23 | Gene Snora73      | U17B, Snora73 small nucleolar RNA, H/ACA box 73b                     | NR_028513.1      |
| 23 | Gene Snora73      | E1, E1b, E1-7, I small nucleolar RNA, H/ACA box 73a                  | NR_028512.1      |
| 28 | Gene Phactr4      | 3110001B12Ri phosphatase and actin regulator 4                       | NM_175306.4, NM  |

|    |              |                                                                        |                 |
|----|--------------|------------------------------------------------------------------------|-----------------|
| 30 | Gene Med18   | Med18, 28100 mediator of RNA polymerase II transcription, subunit 18   | NM_026039.3     |
| 33 | Gene Sesn2   | Sesn2, MGC11 sestrin 2                                                 | NM_144907.1     |
| 28 | Gene Atpif1  | Atpif1, If1, AtpATPase inhibitory factor 1                             | NM_007512.3     |
| 28 | Gene Dnajc8  | Dnajc8, 20100 DnaJ (Hsp40) homolog, subfamily C, member 8              | NM_172400.3     |
| 35 | Gene Eya3    | Eya3, AI84463 eyes absent 3 homolog (Drosophila)                       | NM_010166.2, NM |
| 35 | Gene Xkr8    | Gm1031, MGCX Kell blood group precursor related family member 8        | NM_201368.1     |
| 35 | Gene Smpdl3b | Smpdl3b, 111C sphingomyelin phosphodiesterase, acid-like 3B            | NM_133888.2     |
| 28 | Gene Rpa2    | AI325195, AUC replication protein A2                                   | NM_011284.3     |
| 39 | Gene Fam76a  | Fam76a, MGC: family with sequence similarity 76, member A              | NM_145553.2, NM |
| 28 | Gene Fgr     | Fgr Gardner-Rasheed feline sarcoma viral (Fgr) oncogene                | NM_010208.4     |
| 31 | Gene Ahdc1   | MGC29331, A1 AT hook, DNA binding motif, containing 1                  | NM_146155.3     |
| 32 | Gene Wasf2   | D4Ert13e, W1 WAS protein family, member 2                              | NM_153423.6     |
| 23 | Gene Map3k6  | Ask2, MGC159 mitogen-activated protein kinase kinase kinase 6          | NM_016693.5     |
| 18 | Gene Syt11   | Syt11, 9030417 synaptotagmin-like 1                                    | NM_031393.2     |
| 21 | Gene Tmem22  | AA409341, 57: transmembrane protein 222                                | NM_025667.3     |
| 27 | Gene Nudc    | Silg92, SIG-92, nuclear distribution gene C homolog (Aspergillus)      | NM_010948.3     |
| 27 | Gene Nr0b2   | SHP, Shp1, SHF nuclear receptor subfamily O, group B, member 2         | NM_011850.2     |
| 29 | Gene Gpatch3 | D930035B09R1 G patch domain containing 3                               | NM_172876.2     |
| 29 | Gene Gpn2    | Atpbd1b, R74E GPN-loop GTPase 2                                        | NM_133884.2     |
| 35 | Gene Pigv    | B330013B03, I phosphatidylinositol glycan anchor biosynthesis, class I | NM_178698.5, NM |
| 37 | Gene Arid1a  | 1110030E03R1 AT rich interactive domain 1A (SWI-like)                  | NM_001080819.1  |
| 26 | Gene Hmgn2   | MGC102472, F high mobility group nucleosomal binding domain 2          | NM_016957.3     |
| 26 | Gene Dhdds   | CIT, DS, Dhdds dehydrolipoyl dihydrolipoamide S-transferase            | NM_026144.4     |
| 37 | Gene Cnksr1  | Cnksr1, BC037 connector enhancer of kinase suppressor of Ras 1         | NM_001081047.1  |
| 37 | Gene Zfp593  | AV062409, Zfp zinc finger protein 593                                  | NM_024215.2     |
| 37 | Gene E130218 | E130106C14R1 RIKEN cDNA E130218I03 gene                                | NR_040435.1, NR |
| 37 | Gene Grp1    | 2810043G13R1 glycine/arginine rich protein 1                           | NM_001099296.1  |
| 33 | Gene Pdik1l  | MGC36635, st1 PDLIM1 interacting kinase 1 like                         | NM_146156.3, NM |
| 31 | Gene Stmn1   | Smn, Pp17, P1 stathmin 1                                               | NM_019641.4     |
| 35 | Gene Mtrf1l  | Fam54b, AI48C mitochondrial fission regulator 1-like                   | NM_001256112.1  |
| 35 | Gene Sepn1   | Sepn1, AI4144 selenoprotein N, 1                                       | NM_029100.2     |
| 35 | Gene Man1c1  | Man1c1, AI59E mannosidase, alpha, class 1C, member 1                   | NM_207237.3     |
| 25 | Gene Ldlrap1 | Arh, AA69126C low density lipoprotein receptor adaptor protein 1       | NM_145554.2     |
| 36 | Gene Tmem57  | Tmem57, AI31 transmembrane protein 57                                  | NM_025382.6     |
| 56 | Gene Tmem50  | Smp1, Tmem5 transmembrane protein 50A                                  | NM_027935.2     |
| 56 | Gene D4Wsu5  | 2700043I21R1 DNA segment, Chr 4, Wayne State University 53, ex1        | NM_023665.3     |
| 56 | Gene Syf2    | Ntc31, p29, Sy SYF2 homolog, RNA splicing factor (S. cerevisiae)       | NM_026780.3     |
| 35 | Gene Clic4   | mc3s5, Clic4, I chloride intracellular channel 4 (mitochondrial)       | NM_013885.2     |
| 19 | Gene Srrm1   | Srrm1, AA407E serine/arginine repetitive matrix 1                      | NM_016799.3, NM |
| 31 | Gene Srsf10  | SRrp40, Srsf10 serine/arginine-rich splicing factor 10                 | NM_001080387.1  |
| 26 | Gene Cnr2    | Cnr2, CB2-R, C cannabinoid receptor 2 (macrophage)                     | NM_009924.3     |
| 26 | Gene Fuca1   | Afuc, 9530055 fucosidase, alpha-L- 1, tissue                           | NM_024243.4     |
| 34 | Gene Hmgcl   | AW476067, H1 3-hydroxy-3-methylglutaryl-Coenzyme A lyase               | NM_008254.2     |
| 34 | Gene Gale    | 2310002A12R1 galactose-4-epimerase, UDP                                | NM_178389.3     |
| 34 | Gene Lypla2  | Lypla2, Lysol1 lysophospholipase 2                                     | NM_011942.1     |
| 34 | Gene Pithd1  | Trp26, AA4081PITH (C-terminal proteasome-interacting domain of         | NM_025411.4     |
| 19 | Gene Tceb3   | AA408125, Tce transcription elongation factor B (SIII), polypeptide 3  | NM_013736.4     |

|    |               |                                                                      |                 |
|----|---------------|----------------------------------------------------------------------|-----------------|
| 51 | Gene Rpl11    | Rpl11, 201020 ribosomal protein L11                                  | NM_025919.2     |
| 33 | Gene Id3      | bHLHb25, Idb3 inhibitor of DNA binding 3                             | NM_008321.2     |
| 37 | Gene E2f2     | E2f2, 9230110. E2F transcription factor 2                            | NM_177733.6     |
| 26 | Gene Zfp46    | Zfp-46, Znf436 zinc finger protein 46                                | NM_009557.3     |
| 33 | Gene Hnrnpr   | 2610003J05Ri heterogeneous nuclear ribonucleoprotein R               | NM_028871.1     |
| 24 | Gene Luzp1    | Luzp1, MGC16 leucine zipper protein 1                                | NM_024452.2     |
| 23 | Gene Lactbl1  | Lactbl1, BC029684                                                    | NM_001243262.1  |
| 35 | Gene Ephb2    | Tyro5, Erk, Drt Eph receptor B2                                      | NM_010142.2     |
| 32 | Gene Zbtb40   | MGC62412, m zinc finger and BTB domain containing 40                 | NM_198248.1     |
| 30 | Gene Wnt4     | Wnt4, MGC12: wingless-related MMTV integration site 4                | NM_009523.2     |
| 20 | Gene Cdc42    | Cdc42, AI747189, AU018915                                            | NM_001243769.1  |
| 19 | Gene Rpl31-ps | OTTMUSG000I ribosomal protein L31, pseudogene 10                     |                 |
| 34 | Gene Hspg2    | Hspg2, per, Plc perlecan (heparan sulfate proteoglycan 2)            | NM_008305.3     |
| 24 | Gene Usp48    | AI115503, 281 ubiquitin specific peptidase 48                        | NM_130879.2     |
| 24 | Gene Rap1gap  | 1300019I11Rik Rap1 GTPase-activating protein                         | NM_001081155.2  |
| 26 | Gene Alpl     | AP-TNAP, Alpl, alkaline phosphatase, liver/bone/kidney               | NM_007431.2     |
| 26 | Gene Ece1     | ECE-1b, AW32. endothelin converting enzyme 1                         | NM_199307.2     |
| 46 | Gene Eif4g3   | eIF4GIII, G1-41: eukaryotic translation initiation factor 4 gamma, 3 | NM_001256195.1  |
| 46 | Gene Hp1bp3   | Hp1bp74, Hp1 heterochromatin protein 1, binding protein 3            | NM_010470.2, NM |
| 32 | Gene Pink1    | AU042772, 11: PTEN induced putative kinase 1                         | NM_026880.2     |
| 26 | Gene Fam43b   | Fam43b, OTTM family with sequence similarity 43, member B            | NM_001081672.2  |
| 25 | Gene Camk2n   | 1810006K23Ri calcium/calmodulin-dependent protein kinase II inh      | NM_025451.2     |
| 28 | Gene Otud3    | Otud3, 311003: OTU domain containing 3                               | NM_028453.1     |
| 22 | Gene Rnf186   | Rnf186, 91300 ring finger protein 186                                | NM_025786.3     |
| 22 | Gene Tmco4    | AI430825, Tmc transmembrane and coiled-coil domains 4                | NM_029857.3     |
| 27 | Gene Nbl1     | DAN, MGC123 neuroblastoma, suppression of tumorigenicity 1           | NM_008675.2     |
| 44 | Gene Minos1   | Minos1, 23100 mitochondrial inner membrane organizing system 1       | NM_001163006.2  |
| 18 | Gene Capzb    | 1700120C01Ri capping protein (actin filament) muscle Z-line, beta    | NM_001037761.1  |
| 38 | Gene Pqlc2    | MGC38094, BC PQ loop repeat containing 2                             | NM_145384.2     |
| 38 | Gene Akr7a5   | 0610025K21Ri aldo-keto reductase family 7, member A5 (aflatoxin      | NM_025337.3     |
| 29 | Gene Iffo2    | MGC36549, C7 intermediate filament family orphan 2                   | NM_183148.3, NM |
| 19 | Gene Crocc    | Crocc, KIAA04: ciliary rootlet coiled-coil, rootletin                | NM_172122.2, NM |
| 26 | Gene Necap2   | C78898, Neca: NECAP endocytosis associated 2                         | NM_025383.3     |
| 26 | Gene Spata21  | 4933414G08, 5 spermatogenesis associated 21                          | NM_177867.3     |
| 35 | Gene Szrd1    | Szrd1, 111002: SUZ RNA binding domain containing 1                   | NM_001025608.1  |
| 35 | Gene Fbxo42   | 6720460I06Rik F-box protein 42                                       | NM_172518.3     |
| 29 | Gene EphA2    | Sek2, AW5452 Eph receptor A2                                         | NM_010139.3     |
| 29 | Gene Gm694    | Gm694 predicted gene 694                                             | NM_001033374.3  |
| 29 | Gene Zbtb17   | Zbtb17, Miz1, zinc finger and BTB domain containing 17               | NM_009541.2     |
| 35 | Gene Spen     | Mint, mKIAA0: SPEN homolog, transcriptional regulator (Drosophila    | NM_019763.2     |
| 35 | Gene Gm4123   | Gm4123 predicted gene 4123                                           | XR_168665.1     |
| 35 | Gene B330016  | B330016D10Ri RIKEN cDNA B330016D10 gene                              | NR_030695.1     |
| 18 | Gene Fblim1   | 2410043F08Ri filamin binding LIM protein 1                           | NM_133754.5, NM |
| 17 | Gene Tmem82   | Tmem82, MGC transmembrane protein 82                                 | NM_145987.2     |
| 17 | Gene Slc25a34 | Slc25a34, Gm1 solute carrier family 25, member 34                    | NM_001013780.1  |
| 21 | Gene Plekhm2  | mKIAA0842, A pleckstrin homology domain containing, family M (w      | NM_001033150.1  |
| 19 | Gene Ddi2     | AI604911, 913 DNA-damage inducible protein 2                         | NM_001017966.2  |

|    |               |                                                                     |                 |
|----|---------------|---------------------------------------------------------------------|-----------------|
| 31 | Gene Dnajc16  | D030060M24, DnaJ (Hsp40) homolog, subfamily C, member 16            | NM_172338.2     |
| 31 | Gene Casp9    | AW493809, C/caspase 9                                               | NM_015733.4     |
| 33 | Gene Efhd2    | 2600015J22Ri EF hand domain containing 2                            | NM_025994.3     |
| 23 | Gene Tmem51   | BC003277, FLJ transmembrane protein 51                              | NM_145402.3     |
| 23 | Gene Tmem51   | Tmem51as1, E Tmem51 antisense RNA 1                                 | NR_027137.1     |
| 24 | Gene Kazn     | 2310007B04Ri kazrin, periplakin interacting protein                 | NM_144531.3, NM |
| 32 | Gene Prdm2    | Znfpr1c1, Riz1, PR domain containing 2, with ZNF domain             | NM_001081355.3  |
| 22 | Gene Lrrc38   | Lrrc38, A2300 leucine rich repeat containing 38                     | NM_001162983.1  |
| 17 | Gene Dhrr3    | Rsd1, retSDR1 dehydrogenase/reductase (SDR family) member 3         | NM_001172424.1, |
| 32 | Gene Vps13d   | BC037490, C8 vacuolar protein sorting 13 D (yeast)                  | NM_001128198.1  |
| 21 | Gene Gm1313   | Gm13139, MG predicted gene 13139                                    | NM_001083918.1  |
| 25 | Gene Plod1    | AI854890, 241 procollagen-lysine, 2-oxoglutarate 5-dioxygenase 1    | NM_011122.3     |
| 25 | Gene 2510039  | 2510039O18Ri, Kiaa2013                                              | NM_029841.3     |
| 26 | Gene Agtrap   | 3300002E14Ri angiotensin II, type I receptor-associated protein     | NM_009642.4     |
| 26 | Gene Draxin   | 2610109H07Ri dorsal inhibitory axon guidance protein                | NM_027426.3     |
| 30 | Gene Mtor     | RAFT1, AI3270 mechanistic target of rapamycin (serine/threonine k   | NM_020009.2     |
| 42 | Gene Exosc10  | p4, Exosc10, R exosome component 10                                 | NM_016699.2     |
| 42 | Gene Srm      | SpdSy, AA407 spermidine synthase                                    | NM_009272.4     |
| 35 | Gene Tardbp   | TDP-43, Tardbp, TAR DNA binding protein                             | NM_145556.4, NM |
| 19 | Gene Pex14    | Pex14p, R7513 peroxisomal biogenesis factor 14                      | NM_019781.2     |
| 19 | Gene Dffa     | ICAD-S, ICAD, DNA fragmentation factor, alpha subunit               | NM_001025296.1, |
| 26 | Gene Apitd1   | 2810407L01Ri apoptosis-inducing, TAF9-like domain 1                 | NM_027263.2     |
| 33 | Gene Pgd      | Pgd, AU01987 phosphogluconate dehydrogenase                         | NM_001081274.1  |
| 33 | Gene Kif1b    | A530096N05R kinesin family member 1B                                | NM_008441.2, NM |
| 31 | Gene Ube4b    | 4930551119Ri ubiquitination factor E4B, UFD2 homolog (S. cerevisi   | NM_022022.3     |
| 29 | Gene Nmnat1   | nmnat, 57304 nicotinamide nucleotide adenyltransferase 1            | NM_133435.1     |
| 29 | Gene Lzic     | AW047580, 18 leucine zipper and CTNNBIP1 domain containing          | NM_026963.5     |
| 37 | Gene Slc25a33 | Slc25a33, Pnc1 solute carrier family 25, member 33                  | NM_027460.2, XM |
| 33 | Gene Spsb1    | Spsb1, MGC10 sPLA/ryanodine receptor domain and SOCS box cont       | NM_029035.2     |
| 28 | Gene H6pd     | G6pd1, Gpd1, hexose-6-phosphate dehydrogenase (glucose 1-deh        | NM_173371.3     |
| 33 | Gene Gpr157   | Gpr157, F7301 G protein-coupled receptor 157                        | NM_177366.3     |
| 20 | Gene Rere     | ARP, AW74257 arginine glutamic acid dipeptide (RE) repeats          | NM_001085492.1  |
| 23 | Gene 1700045  | 1700045H11Ri RIKEN cDNA 1700045H11 gene                             | NR_040649.1     |
| 23 | Gene Errfi1   | AI788755, 130 ERBB receptor feedback inhibitor 1                    | NM_133753.1     |
| 18 | Gene Park7    | Park7, Dj1, DJ- Parkinson disease (autosomal recessive, early onset | NM_020569.3     |
| 27 | Gene Per3     | 2810049O06Ri period circadian clock 3                               | NM_011067.2     |
| 27 | Gene Vamp3    | Vamp3, ceb, D vesicle-associated membrane protein 3                 | NM_009498.4     |
| 28 | Gene Camta1   | AI316882, mKl calmodulin binding transcription activator 1          | NM_001081557.3  |
| 28 | Gene 9230110  | 9230110K08Ri RIKEN cDNA 9230110K08 gene                             | XM_003945766.1, |
| 39 | Gene Dnajc11  | E030019A03Ri DnaJ (Hsp40) homolog, subfamily C, member 11           | NM_172704.3     |
| 37 | Gene Thap3    | 2210418H06Ri THAP domain containing, apoptosis associated prot      | NM_175152.4, NM |
| 37 | Gene Phf13    | SPOC1, Phf13, PHD finger protein 13                                 | NM_172705.2     |
| 46 | Gene Kihl21   | 1810045K06Ri, Kihl21, mKIAA0469, D330008A20                         | NM_001033352.3  |
| 46 | Gene Zbtb48   | AI327031, Zbt zinc finger and BTB domain containing 48              | NM_133879.2     |
| 48 | Gene Tas1r1   | TR1, Gpr70, T1 taste receptor, type 1, member 1                     | NM_031867.2     |
| 48 | Gene Nol9     | MGC159135, Nucleolar protein 9                                      | NM_028727.2, NM |
| 25 | Gene Plekhg5  | BC023181, mK pleckstrin homology domain containing, family G (w     | NM_001004156.2  |

|    |               |                                                                       |                                |
|----|---------------|-----------------------------------------------------------------------|--------------------------------|
| 25 | Gene Tnfrsf25 | WSL-1, Wsl, TNF tumor necrosis factor receptor superfamily, member 25 | NM_033042.3                    |
| 25 | Gene Espn     | je, Espn, espin                                                       | NM_207688.2, NM_207688.2       |
| 17 | Gene Gm2037   | Gm20377, OTI predicted gene, 20377                                    |                                |
| 17 | Gene Hes2     | Hes2, HES-2, hairy and enhancer of split 2 (Drosophila)               | NM_008236.4                    |
| 23 | Gene Acot7    | Act, Ach1, AUC acyl-CoA thioesterase 7                                | NM_133348.2, NM_133348.2       |
| 21 | Gene Gpr153   | 1110065N12Ri G protein-coupled receptor 153                           | NM_178406.2                    |
| 36 | Gene Hes3     | MGC144657, hairy and enhancer of split 3 (Drosophila)                 | NM_008237.4                    |
| 36 | Gene Icmt     | OTTMUSG000i isoprenylcysteine carboxyl methyltransferase              | NM_133788.2, NR_133788.2       |
| 36 | Gene Rnf207   | D330010C22Ri ring finger protein 207                                  | NM_001033489.2                 |
| 27 | Gene Rpl22    | 2700038K18Ri ribosomal protein L22                                    | NM_009079.2                    |
| 21 | Gene Ajap1    | Gm573, Ajap1 adherens junction associated protein 1                   | NM_001099299.1                 |
| 27 | Gene BC039966 | BC039966 cDNA sequence BC039966                                       | NR_040670.1                    |
| 27 | Gene A430005  | A430005L14Ri RIKEN cDNA A430005L14 gene                               | NM_175287.4, NM_175287.4       |
| 34 | Gene Dffb     | DFF40, 40kDa, DNA fragmentation factor, beta subunit                  | NM_007859.4                    |
| 34 | Gene Cep104   | BC046331, Kia centrosomal protein 104                                 | NM_177673.2                    |
| 30 | Gene Lrrc47   | mKIAA1185, 2-leucine rich repeat containing 47                        | NM_201226.1                    |
| 30 | Gene Smim1    | 0610011H04Ri small integral membrane protein 1                        | NM_001163721.1, NM_001163721.1 |
| 26 | Gene Wrap73   | 5330425N03Ri WD repeat containing, antisense to Trp73                 | NM_021499.2                    |
| 26 | Gene Tprgl    | RP23-254N4.1 transformation related protein 63 regulated like         | NM_026388.2                    |
| 25 | Gene Megf6    | 2600001P17Ri multiple EGF-like-domains 6                              | NM_001162977.1                 |
| 18 | Gene Prdm16   | 5730557K01Ri PR domain containing 16                                  | NM_027504.3, NM_027504.3       |
| 18 | Gene 5930403  | 5930403L14Ri RIKEN cDNA 5930403L14 gene                               | NR_045643.1                    |
| 18 | Gene Gm1311   | Gm13111, OTI predicted gene 13111                                     | XR_104909.2                    |
| 26 | Gene Hes5     | bHLHb38, Hes, hairy and enhancer of split 5 (Drosophila)              | NM_010419.4                    |
| 26 | Gene Pank4    | D030031I12Ri pantothenate kinase 4                                    | NM_172990.4                    |
| 42 | Gene Rer1     | Rer1, 5830454 RER1 retention in endoplasmic reticulum 1 homolog       | NM_026395.1                    |
| 42 | Gene Morn1    | 2900057D20Ri MORN repeat containing 1                                 | NM_001081100.1                 |
| 58 | Gene Ski      | BC004088, 231ski sarcoma viral oncogene homolog (avian)               | NM_011385.2                    |
| 58 | Gene Gm1931   | Gm19313 predicted gene, 19313                                         | XR_140669.1, XR_140669.1       |
| 24 | Gene 2610002  | 2610002J02Ri, Faap20                                                  | NM_001190445.1                 |
| 24 | Gene Prkcz    | zetaPKC, R749 protein kinase C, zeta                                  | NM_008860.2, NM_008860.2       |
| 32 | Gene Gnb1     | Gnb-1, C77571 guanine nucleotide binding protein (G protein), beta    | NM_008142.4, NM_008142.4       |
| 28 | Gene Cdk11b   | Cdc11b, Cdk11 cyclin-dependent kinase 11B                             | NM_007661.3                    |
| 28 | Gene Mmp23    | MGC130335, C matrix metalloproteinase 23                              | NM_011985.2                    |
| 28 | Gene Mib2     | skd, Mib2, 221 mindbomb homolog 2 (Drosophila)                        | NM_001256107.1                 |
| 42 | Gene B930041  | B930041F14Ri RIKEN cDNA B930041F14 gene                               | NM_178699.4                    |
| 42 | Gene Ssu72    | Ssu72, 261010 Ssu72 RNA polymerase II CTD phosphatase homolog         | NM_026899.3                    |
| 41 | Gene Atad3a   | KIAA1273, Tob ATPase family, AAA domain containing 3A                 | NM_179203.3                    |
| 41 | Gene 2610204  | 2610204G22Ri RIKEN cDNA 2610204G22 gene                               | NR_027971.1, NR_027971.1       |
| 41 | Gene Vwa1     | Vwa1, WARP, von Willebrand factor A domain containing 1               | NM_147776.4                    |
| 29 | Gene Tmem88   | A230069A22Ri transmembrane protein 88B                                | NM_001033394.3                 |
| 29 | Gene Ankrd65  | Gm439, Gm45 ankyrin repeat domain 65                                  | XM_003086419.1, XM_003086419.1 |
| 37 | Gene Mrpl20   | 4930425I20Ri mitochondrial ribosomal protein L20                      | NM_025570.2                    |
| 37 | Gene Ccnl2    | 2010319M22R cyclin L2                                                 | NM_207678.1                    |
| 32 | Gene Aurkaip1 | Akip, Aurkaip1 aurora kinase A interacting protein 1                  | NM_025338.4                    |
| 32 | Gene Mxra8    | Asp3, Mxra8, 1 matrix-remodelling associated 8                        | NM_024263.4                    |
| 32 | Gene Dvl1     | KIAA4029, Dvl, dishevelled, dsh homolog 1 (Drosophila)                | NM_010091.3                    |

|    |                   |                                                                       |                  |
|----|-------------------|-----------------------------------------------------------------------|------------------|
| 30 | Gene Tas1r3       | Sac, T1r3, Tas1 taste receptor, type 1, member 3                      | NM_031872.2      |
| 30 | Gene Gltpd1       | RP23-242K15.1 glycolipid transfer protein domain containing 1         | NM_024472.4      |
| 36 | Gene Cpsf3l       | Cpsf3l, 24100C cleavage and polyadenylation specific factor 3-like    | NM_028020.3      |
| 36 | Gene Pusl1        | 2810021111Rik pseudouridylate synthase-like 1                         | NM_001033490.1   |
| 36 | Gene Acap3        | Centb5, mKIAA ArfGAP with coiled-coil, ankyrin repeat and PH domain   | NM_207223.1      |
| 34 | Gene Ube2j2       | 5730472G04Rik ubiquitin-conjugating enzyme E2J 2                      | NM_001039157.1   |
| 49 | Gene B3galt6      | BB129894, Gal UDP-Gal:betaGal beta 1,3-galactosyltransferase, pol     | NM_080445.4      |
| 49 | Gene Sdf4         | Cab45, Sdf4 stromal cell derived factor 4                             | NM_011341.4      |
| 24 | Gene Agrn         | nmf380, Agrin, agrin                                                  | NM_021604.3      |
| 24 | Gene Isg15        | MGC130321, IISG15 ubiquitin-like modifier                             | NM_015783.3      |
| 24 | Gene AW0117       | AW011738 expressed sequence AW011738                                  | NR_030671.1      |
| 24 | Gene Plekhn1      | Plekhn1, BC02 pleckstrin homology domain containing, family N member  | NM_001008233.3   |
| 24 | Gene Khlh17       | AL022703, Khlh kelch-like 17                                          | NM_198305.2      |
| 24 | Gene Noc2l        | Noc2l, NIR, AA nucleolar complex associated 2 homolog (S. cerevisiae) | NM_021303.2      |
| 23 | Gene Cdk6         | Cdk6, 5830411 cyclin-dependent kinase 6                               | NM_009873.2      |
| 33 | Gene Ankib1       | MGC90780, 46 ankyrin repeat and IBR domain containing 1               | NM_001003909.3   |
| 33 | Gene Krit1        | AA432855, 20: KRIT1, ankyrin repeat containing                        | NM_001170552.1   |
| 20 | Gene Akap9        | Akap9, AKAP4: A kinase (PRKA) anchor protein (yotiao) 9               | NM_194462.2      |
| 35 | Gene Cyp51        | Ldm, P450LI, A cytochrome P450, family 51                             | NM_020010.2      |
| 26 | Gene Fzd1         | AW227548, FZ frizzled homolog 1 (Drosophila)                          | NM_021457.3      |
| 21 | Gene Steap1       | 2410007B19Rik six transmembrane epithelial antigen of the prostate    | NM_027399.3      |
| 17 | Gene Dbf4         | AA545217, Asf DBF4 homolog (S. cerevisiae)                            | NM_001190717.1   |
| 17 | Gene Slc25a4c     | B230315F11Rik solute carrier family 25, member 40                     | NM_178766.4      |
| 19 | Gene Rundc3t      | Gm440, MGC6 RUN domain containing 3B                                  | NM_198620.1      |
| 20 | Gene Crot         | Crot, 1200003 carnitine O-octanoyltransferase                         | NM_023733.3      |
| 21 | Gene Tmem24       | Tmem243, 49E transmembrane protein 243, mitochondrial                 | NM_001081029.1   |
| 20 | Gene Dmtf1        | Dmtf1, Dimp, I cyclin D binding myb-like transcription factor 1       | NM_011806.3, NM  |
| 20 | Gene Gm1773       | Gm17739, E03 predicted gene, 17739                                    | XR_141471.2, XR_ |
| 25 | Gene Sema3d       | 4631426B19Rik sema domain, immunoglobulin domain (Ig), short b        | NM_028882.4      |
| 19 | Gene Pclo         | Pclo, mKIAA05 piccolo (presynaptic cytomatrix protein)                | NM_011995.4, NM  |
| 30 | Gene Gnai1        | Gialpha1, Gnaiguanine nucleotide binding protein (G protein), alpha   | NM_010305.1      |
| 19 | Gene 4921504      | 4921504A21Rik RIKEN cDNA 4921504A21 gene                              | XR_106346.2, XR_ |
| 19 | Gene Magi2        | Magi2, mKIAA membrane associated guanylate kinase, WW and P           | NM_015823.3, NM  |
| 32 | Gene Rsbn1l       | Rsbn1l, AI4474 round spermatid basic protein 1-like                   | NM_001080977.1   |
| 32 | Gene A630072      | A630072M18R RIKEN cDNA A630072M18 gene                                | NR_030699.1      |
| 39 | Gene Ptpn12       | PTP-PEST, PTP protein tyrosine phosphatase, non-receptor type 12      | NM_011203.2      |
| 37 | Gene Dnajc2       | Zrf2, MIDA1, A DnaJ (Hsp40) homolog, subfamily C, member 2            | NM_009584.4      |
| 37 | Gene Psmc2        | Psmc2 proteasome (prosome, macropain) 26S subunit, ATP                | NM_011188.3      |
| 34 | Gene 5031425      | 5031425E22Rik RIKEN cDNA 5031425E22 gene                              | NR_040469.1      |
| 34 | Gene Mll5         | 9530077A04Rik myeloid/lymphoid or mixed-lineage leukemia 5            | NM_026984.1      |
| 37 | Gene AI50681      | AI506816 expressed sequence AI506816                                  | NR_015554.2, NR_ |
| 37 | Gene LOC101056102 | envelope glycoprotein-like                                            | XM_003945671.1   |
| 37 | Gene Mir3096      | Mir3096, mmu microRNA 3096                                            | NR_037279.1      |
| 26 | Gene Pus7         | C330017115Rik pseudouridylate synthase 7 homolog (S. cerevisiae)      | NM_178403.4      |
| 26 | Gene Rint1        | Rint-1, MGC18 RAD50 interactor 1                                      | NM_177323.3      |
| 43 | Gene Fam126c      | Drctnbn1a, AB family with sequence similarity 126, member A           | NM_053090.2      |
| 28 | Gene Khlh7        | Klh7, D5Ert363e, SBBI26, 2700038B03Rik                                | NM_026448.3, NM  |

|    |              |                                                                                    |                  |
|----|--------------|------------------------------------------------------------------------------------|------------------|
| 28 | Gene Nupl2   | Nlp1, Nupl2, N nucleoporin like 2                                                  | NM_153092.4      |
| 29 | Gene Kcnh2   | Merg1, merg1 potassium voltage-gated channel, subfamily H (eag-                    | NM_013569.2      |
| 21 | Gene Nos3    | eNOS, Nos-3, ε nitric oxide synthase 3, endothelial cell                           | NM_008713.4      |
| 21 | Gene Atg9b   | Apg9l2, Atg9b, autophagy related 9B                                                | NM_001002897.3   |
| 21 | Gene Abcb8   | 4833412N02Ri ATP-binding cassette, sub-family B (MDR/TAP), mem                     | NM_029020.2      |
| 28 | Gene Fastk   | 0610011K02Ri Fas-activated serine/threonine kinase                                 | NM_023229.2      |
| 28 | Gene Tmub1   | Tmub1, AB030 transmembrane and ubiquitin-like domain containin                     | NM_022418.3      |
| 28 | Gene Agap3   | Agap3, MRIP-1ArfGAP with GTPase domain, ankyrin repeat and PH                      | NM_139153.2, NM  |
| 29 | Gene Abcf2   | Drr3, E430001 ATP-binding cassette, sub-family F (GCN20), membe                    | NM_001190443.1   |
| 29 | Gene Gm1022  | Gm10221, ENS ATP synthase, H+ transporting, mitochondrial F0 complex, subunit g ps |                  |
| 29 | Gene Chpf2   | AW060945, Chondroitin polymerizing factor 2                                        | NM_133913.2      |
| 29 | Gene Mir671  | Mirn671, mmu microRNA 671                                                          | NR_030423.1      |
| 29 | Gene Smarcd3 | 1500001J14Ri SWI/SNF related, matrix associated, actin dependen                    | NM_025891.3      |
| 27 | Gene Wdr86   | Wdr86, BC059 WD repeat domain 86                                                   | NM_001081441.1   |
| 35 | Gene Rheb    | Rheb                                                                               | NM_053075.3      |
| 23 | Gene Prkag2  | AAKG2, Prkag2 protein kinase, AMP-activated, gamma 2 non-cataly                    | NM_145401.2, NM  |
| 23 | Gene 2900005 | 2900005J15Ri RIKEN cDNA 2900005J15 gene                                            | NR_027851.1      |
| 38 | Gene Mll3    | HALR, KIAA15C myeloid/lymphoid or mixed-lineage leukemia 3                         | NM_001081383.1   |
| 38 | Gene 483144C | 4831440E17Ri RIKEN cDNA 4831440E17 gene                                            | NR_030700.1      |
| 27 | Gene 1700096 | 1700096K18Ri RIKEN cDNA 1700096K18 gene                                            | NR_027388.1      |
| 17 | Gene Gm2167  | Gm21671 predicted gene, 21671                                                      | XM_003688807.1   |
| 27 | Gene Paxip1  | PTIP, Paxip1, PAX interacting (with transcription-activation domai                 | NM_018878.2      |
| 30 | Gene Insig1  | Insig-1, Insig1, insulin induced gene 1                                            | NM_153526.5      |
| 18 | Gene En2     | BB131122, En2 engrailed 2                                                          | NM_010134.3      |
| 33 | Gene Rbm33   | Rbm33, 32000 RNA binding motif protein 33                                          | NM_028234.1      |
| 20 | Gene Lmbr1   | 1110048D14Ri limb region 1                                                         | NM_020295.3      |
| 20 | Gene 4632411 | 4632411P08Ri RIKEN cDNA 4632411P08 gene                                            | XR_107686.1, XR_ |
| 24 | Gene Ube3c   | Ube3c, AI8535 ubiquitin protein ligase E3C                                         | NM_133907.3      |
| 27 | Gene Gm5129  | EG332993, Gr predicted gene 5129                                                   | NR_028426.1      |
| 27 | Gene Dnajb6  | Mrj, Dnajb6, r DnaJ (Hsp40) homolog, subfamily B, member 6                         | NM_001037940.4   |
| 25 | Gene Hadha   | C77020, Mtpa, hydroxyacyl-Coenzyme A dehydrogenase/3-ketoacy                       | NM_178878.2      |
| 25 | Gene Hadhb   | 4930479F15Ri hydroxyacyl-Coenzyme A dehydrogenase/3-ketoacy                        | NM_145558.1      |
| 22 | Gene Gm9899  | ENSMUSG000 (predicted gene 9899                                                    | NR_040427.1      |
| 22 | Gene Kcnk3   | TASK, Kcnk3, c potassium channel, subfamily K, member 3                            | NM_010608.2      |
| 26 | Gene Slc35f6 | Slc35f6, 49304 solute carrier family 35, member F6                                 | NM_175675.3      |
| 26 | Gene Cenpa   | Cenp-A, Cenpa centromere protein A                                                 | NM_007681.2      |
| 30 | Gene Mapre3  | EB2, AI790651 microtubule-associated protein, RP/EB family, mem                    | NM_133350.1      |
| 24 | Gene Gm1940  | Gm19409 predicted gene, 19409                                                      | XR_140702.1, XR_ |
| 30 | Gene Tmem21  | FLJ20254, 111 (transmembrane protein 214                                           | NM_144525.3      |
| 25 | Gene Agbl5   | 9430057O19Ri ATP/GTP binding protein-like 5                                        | NM_001048192.2,  |
| 25 | Gene Ost4    | 2310016E02Ri oligosaccharyltransferase 4 homolog (S. cerevisiae)                   | NM_024460.3, NM  |
| 25 | Gene Emilin1 | 5830419M17R elastin microfibril interfacer 1                                       | NM_133918.2      |
| 19 | Gene Khk     | Khk ketohexokinase                                                                 | NM_008439.3      |
| 27 | Gene Trim54  | MURF, MGC13 tripartite motif-containing 54                                         | NM_021447.2      |
| 27 | Gene Ucn     | Ucn1, MGC151 urocortin                                                             | NM_021290.2      |
| 27 | Gene Mpv17   | Tg.Mpv17, Mp MpV17 mitochondrial inner membrane protein                            | NM_008622.5      |
| 25 | Gene Eif2b4  | Eif2b4, Eif2b eukaryotic translation initiation factor 2B, subunit 4               | NM_010122.2, NM  |



|    |              |                                                                        |                  |
|----|--------------|------------------------------------------------------------------------|------------------|
| 25 | Gene Snx17   | Snx17, mKIAA( sorting nexin 17                                         | NM_153680.2      |
| 25 | Gene Zfp513  | AW990386, D <sup>4</sup> zinc finger protein 513                       | NM_001177901.1,  |
| 35 | Gene Ppm1g   | Ppm1g, Fin13, protein phosphatase 1G (formerly 2C), magnesium-c        | NM_008014.3      |
| 27 | Gene Nrbp1   | B230344L17Ri nuclear receptor binding protein 1                        | NM_147201.2      |
| 19 | Gene Krtcap3 | Kcp3, MGC129 keratinocyte associated protein 3                         | NM_027221.3      |
| 21 | Gene Ift172  | wim, 4930553i intraflagellar transport 172                             | NM_026298.5      |
| 21 | Gene Fndc4   | AW487863, FR fibronectin type III domain containing 4                  | NM_022424.5      |
| 21 | Gene Gckr    | MGC19300, Gc glucokinase regulatory protein                            | NM_144909.1      |
| 29 | Gene Mrpl33  | Mrpl33, 06100 mitochondrial ribosomal protein L33                      | NM_025796.3      |
| 35 | Gene Rbks    | RBSK, 523040C ribokinase                                               | NM_153196.1      |
| 35 | Gene Bre     | 6030405P19Ri brain and reproductive organ-expressed protein            | NM_144541.1, NM  |
| 34 | Gene Gm1046  | Gm10463, ENS predicted gene 10463                                      | XR_140699.1, XR_ |
| 34 | Gene Fosl2   | Fosl2, Fra-2 fos-like antigen 2                                        | NM_008037.4      |
| 29 | Gene Yes1    | Yes1, Yes, A132 Yamaguchi sarcoma viral (v-yes) oncogene homolog       | NM_009535.3, NM  |
| 23 | Gene Pisd    | 9030221M09R phosphatidylserine decarboxylase                           | NM_177298.3      |
| 29 | Gene Prr14l  | 6030436E02Ri proline rich 14-like                                      | NM_194340.2      |
| 29 | Gene Depdc5  | Depdc5, KIAAC DEP domain containing 5                                  | NM_001170567.1   |
| 20 | Gene Ywhah   | Ywhah tyrosine 3-monooxygenase/tryptophan 5-monooxyg                   | NM_011738.2      |
| 31 | Gene Maea    | Maea, EMP, 11 macrophage erythroblast attacher                         | NM_021500.2      |
| 38 | Gene Slbp    | Slbp                                                                   | NM_009193.1      |
| 38 | Gene Tmem12  | AA409575, Tm transmembrane protein 129                                 | NM_026698.2      |
| 38 | Gene Tacc3   | Aint, Eric1, Tac transforming, acidic coiled-coil containing protein 3 | NM_001040435.2   |
| 23 | Gene Fgfr3   | CD333, sam3, fibroblast growth factor receptor 3                       | NM_001163215.2   |
| 27 | Gene Letm1   | Letm1                                                                  | NM_019694.1      |
| 42 | Gene Nelfa   | Whsc2, Whsc2 negative elongation factor complex member A, Whs          | NM_011914.2      |
| 23 | Gene Gm1673  | Gm1673                                                                 | NM_001033458.3   |
| 18 | Gene Nat8l   | Nat8l, Shati, 1: N-acetyltransferase 8-like                            | NM_001001985.3   |
| 18 | Gene Poln    | POL4P, Poln DNA polymerase N                                           | NM_181857.3      |
| 23 | Gene Zfyve28 | mKIAA1643, G zinc finger, FYVE domain containing 28                    | NM_001015039.1   |
| 25 | Gene Gm2144  | Gm21446 predicted gene, 21446                                          | XM_003688815.1,  |
| 25 | Gene Rnf4    | AU018689, Gt ring finger protein 4                                     | NM_011278.4      |
| 36 | Gene Tnip2   | 1810020H16Ri TNFAIP3 interacting protein 2                             | NM_139064.2      |
| 19 | Gene Sh3bp2  | 3BP2, Sh3bp2 SH3-domain binding protein 2                              | NM_001136088.1,  |
| 29 | Gene Add1    | A1256389, Add adducin 1 (alpha)                                        | NM_013457.3, NM  |
| 29 | Gene Mfsd10  | Mfsd10, Tetra major facilitator superfamily domain containing 10       | NM_026660.2      |
| 29 | Gene Nop14   | 2610033H07Ri NOP14 nucleolar protein                                   | NM_029278.2      |
| 19 | Gene Htt     | A1256365, C43 huntingtin                                               | NM_010414.2      |
| 19 | Gene Msantd1 | Gm144, A930C Myb/SANT-like DNA-binding domain containing 1             | NM_207277.1      |
| 26 | Gene Rgs12   | Rgs12, 120001 regulator of G-protein signaling 12                      | NM_173402.2, NM  |
| 19 | Gene E130018 | E130018O15Ri RIKEN cDNA E130018O15 gene                                | XR_107675.1, XR_ |
| 19 | Gene Hmx1    | Nkx5-3, Hmx1 H6 homeobox 1                                             | NM_010445.2      |
| 27 | Gene Trmt44  | 2310079F23Ri tRNA methyltransferase 44                                 | NM_030208.3      |
| 27 | Gene 4931431 | 4931431C16Ri RIKEN cDNA 4931431C16 gene                                | NR_045807.1      |
| 27 | Gene Acox3   | Acox3, EST-s55 acyl-Coenzyme A oxidase 3, pristanoyl                   | NM_030721.2      |
| 25 | Gene Htra3   | 9530081K03Ri HtrA serine peptidase 3                                   | NM_001042615.1   |
| 16 | Gene Sh3tc1  | MGC67153, BCSH3 domain and tetratricopeptide repeats 1                 | NM_194344.2      |
| 25 | Gene Ablim2  | C230091L11, A actin-binding LIM protein 2                              | NM_001177696.1   |

|    |              |                                                                        |                 |
|----|--------------|------------------------------------------------------------------------|-----------------|
| 25 | Gene Afap1   | AI848729, 260 actin filament associated protein 1                      | NM_027373.2     |
| 33 | Gene Sorcs2  | mKIAA1329, N sortilin-related VPS10 domain containing receptor 2       | NM_030889.2     |
| 37 | Gene Grpel1  | mt-GrpE#1, AA GrpE-like 1, mitochondrial                               | NM_024478.2     |
| 37 | Gene Tada2b  | Gm145, Tada2 transcriptional adaptor 2B                                | NM_001170454.1  |
| 37 | Gene Ccdc96  | Ccdc96, 49215 coiled-coil domain containing 96                         | NM_025725.2     |
| 37 | Gene Tbc1d14 | D5Erd110e, C TBC1 domain family, member 14                             | NM_133910.3, NM |
| 33 | Gene Bloc1s4 | Blos4, Cno, 26: biogenesis of organelles complex-1, subunit 4, capping | NM_133724.3     |
| 21 | Gene Mrfap1  | 9130413122Rik Morf4 family associated protein 1                        | NM_026242.3     |
| 26 | Gene Man2b2  | mKIAA0935, M mannosidase 2, alpha B2                                   | NM_008550.2     |
| 16 | Gene Crmp1   | Ulip3, DRP-1, C collapsin response mediator protein 1                  | NM_007765.3, NM |
| 27 | Gene Evc     | Evc Ellis van Creveld gene syndrome                                    | NM_021292.2     |
| 27 | Gene Evc2    | Lbn, Evc2, limit Ellis van Creveld syndrome 2                          | NM_145920.3     |
| 19 | Gene Msx1    | AI324650, msh homeobox, msh-like 1                                     | NM_010835.2     |
| 19 | Gene Msx1as  | Msx1as homeobox, msh-like 1 antisense                                  | NR_027920.1     |
| 24 | Gene Stx18   | AU041562, 18: syntaxin 18                                              | NM_026959.2     |
| 20 | Gene Nsg1    | p21, Neep21, r neuron specific gene family member 1                    | NM_010942.3     |
| 21 | Gene Zbtb49  | Znf509, Zfp509 zinc finger and BTB domain containing 49                | NM_029162.2     |
| 21 | Gene Lyar    | Lyar, MLZ-264                                                          | NM_025281.3     |
| 18 | Gene Tmem12  | 2810021014Rik transmembrane protein 128                                | NM_025480.3     |
| 22 | Gene Wdr1    | D5Wsu185e, r WD repeat domain 1                                        | NM_011715.2     |
| 23 | Gene Zfp518b | AI661722, AA4 zinc finger protein 518B                                 | NM_001081144.2, |
| 30 | Gene Rab28   | Rab28, MGC8C RAB28, member RAS oncogene family                         | NM_027295.2     |
| 21 | Gene Bod1l   | mKIAA1327, A biorientation of chromosomes in cell division 1-like      | NM_001081422.2  |
| 33 | Gene Gm7854  | ENSMUSG000 (predicted gene 7854)                                       | NR_028417.1     |
| 33 | Gene Cpeb2   | Cpe-bp2, A630 cytoplasmic polyadenylation element binding protei       | NM_001177379.1  |
| 32 | Gene Fbxl5   | Fbl4, Fbxl5, Fir F-box and leucine-rich repeat protein 5               | NM_178729.4, NM |
| 29 | Gene Lap3    | Peps, Lapep, P leucine aminopeptidase 3                                | NM_024434.6     |
| 29 | Gene Med28   | magicin, Med2 mediator of RNA polymerase II transcription, subuni      | NM_025895.4     |
| 29 | Gene Fam184l | 9630031F12Rik family with sequence similarity 184, member B            | NM_021416.3     |
| 33 | Gene 1600023 | AV119442, 16 (RIKEN cDNA 1600023N17 gene                               | XM_003945390.1, |
| 33 | Gene Ncapg   | 5730507H05Rik non-SMC condensin I complex, subunit G                   | NM_019438.1     |
| 32 | Gene Lcorl   | Mlr1, Lcorl ligand dependent nuclear receptor corepressor-like         | NM_172153.3, NM |
| 20 | Gene Slit2   | Slit2, KIAA414: slit homolog 2 (Drosophila)                            | NM_178804.3     |
| 39 | Gene Gpr125  | AU044632, 38: G protein-coupled receptor 125                           | NM_133911.1     |
| 24 | Gene Dhx15   | DBP1, Dhx15, IDEAH (Asp-Glu-Ala-His) box polypeptide 15                | NM_007839.2, NM |
| 24 | Gene 9230114 | 9230114K14Rik RIKEN cDNA 9230114K14 gene                               | NR_015537.2     |
| 24 | Gene C130083 | C130083M11R RIKEN cDNA C130083M11 gene                                 | NR_040717.1     |
| 27 | Gene Sepsecs | SecS, AA98671 Sep (O-phosphoserine) tRNA:Sec (selenocysteine) tR       | NM_172490.3     |
| 23 | Gene Rbpj    | CBF1, Rbpsuh, recombination signal binding protein for immunogl        | NM_001080928.1  |
| 20 | Gene Stim2   | Stim2 stromal interaction molecule 2                                   | NM_001081103.2  |
| 18 | Gene 4932441 | 4932441J04Rik RIKEN cDNA 4932441J04 gene                               | NR_015588.2     |
| 18 | Gene Pcdh7   | Pcdh7                                                                  | NM_001122758.1  |
| 30 | Gene Rell1   | AA536743, Rel RELT-like 1                                              | NM_145923.4     |
| 25 | Gene Tbc1d1  | MGC144097, r TBC1 domain family, member 1                              | NM_019636.2     |
| 27 | Gene Gm2003  | Gm20033 predicted gene, 20033                                          | XM_003084622.2  |
| 27 | Gene Klf3    | MGC151315, S Kruppel-like factor 3 (basic)                             | NM_008453.5     |
| 27 | Gene Tlr6    | Tlr6 toll-like receptor 6                                              | NM_011604.3     |

|    |              |                                                                      |                  |
|----|--------------|----------------------------------------------------------------------|------------------|
| 27 | Gene Fam114  | MGC117924, F family with sequence similarity 114, member A1          | NM_026667.3      |
| 27 | Gene Mir574  | Mir574, Mirn5 microRNA 574                                           | NR_030577.1      |
| 30 | Gene Rfc1    | Recc1, Alp145, replication factor C (activator 1) 1                  | NM_011258.2      |
| 58 | Gene Klb     | AV071179, Klb klotho beta                                            | NM_031180.2      |
| 58 | Gene Rpl9    | MGC102393, Ribosomal protein L9                                      | NM_011292.2      |
| 58 | Gene Lias    | Lias, 7a5ex, C7 lipoic acid synthetase                               | NM_024471.4      |
| 24 | Gene Ugdh    | Udpgdh, Ugdh UDP-glucose dehydrogenase                               | NM_009466.2      |
| 30 | Gene Smim14  | Smim14, 5430.small integral membrane protein 14                      | NM_133697.3      |
| 23 | Gene Ube2k   | Ube2k, D5Ertd601e, AW492011, E2-25k, Hypg, Lig, Hip2                 | NM_016786.3      |
| 21 | Gene Pds5a   | E230024D05Ri PDS5, regulator of cohesion maintenance, homolog        | NM_001081321.1   |
| 22 | Gene N4bp2   | Gm1791, Gm8 NEDD4 binding protein 2                                  | NM_001024917.1   |
| 34 | Gene Apbb2   | Apbb2, FE65L1 amyloid beta (A4) precursor protein-binding, family    | NM_009686.1, NM  |
| 21 | Gene Limch1  | 3732412D22Ri LIM and calponin homology domains 1                     | NM_001001980.2   |
| 23 | Gene Tmem33  | 5430406L04Ri transmembrane protein 33                                | NM_028975.3, NM  |
| 21 | Gene Slc30a9 | GAC63, HUEL, solute carrier family 30 (zinc transporter), member 9   | NM_178651.3      |
| 20 | Gene Shisa3  | Shisa3, mShisa shisa homolog 3 (Xenopus laevis)                      | NM_001033415.3   |
| 20 | Gene Atp8a1  | Atp8a1, AW74 ATPase, aminophospholipid transporter (APLT), clas      | NM_001038999.1   |
| 17 | Gene Kctd8   | A730087N02R potassium channel tetramerisation domain containi        | NM_175519.5      |
| 28 | Gene Nfxl1   | TCF9, Nfxl1, G1 nuclear transcription factor, X-box binding-like 1   | NM_133921.2      |
| 31 | Gene Slain2  | 5033405K12Ri SLAIN motif family, member 2                            | NM_153567.2, NM  |
| 18 | Gene Slc10a4 | Slc10a4, E130E solute carrier family 10 (sodium/bile acid cotranspor | NM_173403.2      |
| 27 | Gene Fryl    | Fryl, 9030227C furry homolog-like (Drosophila)                       | NM_028194.2      |
| 28 | Gene Dcun1d4 | AI836376, Dcu DCN1, defective in cullin neddylation 1, domain con    | NM_001190733.1,  |
| 19 | Gene Usp46   | 2410018I08Ri ubiquitin specific peptidase 46                         | NM_177561.3      |
| 31 | Gene Dancr   | Dancr, 270002 differentiation antagonizing non-protein coding RNA    | NR_015531.1      |
| 31 | Gene Snora26 | Snora26, MBI-small nucleolar RNA, H/ACA box 26                       | NR_031758.1      |
| 41 | Gene Rasl11b | 1190017B18Ri RAS-like, family 11, member B                           | NM_026878.1      |
| 53 | Gene Scfd2   | E430013M20R Sec1 family domain containing 2                          | NM_178672.6, NM  |
| 53 | Gene Fip111  | 1300019H17Ri FIP1 like 1 (S. cerevisiae)                             | NM_001159573.1   |
| 20 | Gene Chic2   | BTL, 4930502K cysteine-rich hydrophobic domain 2                     | NM_028850.4      |
| 26 | Gene Gm1958  | Gm19583 predicted gene, 19583                                        | NR_045792.1      |
| 26 | Gene Pdgfra  | Pdgfra, Pdgr-2 platelet derived growth factor receptor, alpha polyp  | NM_001083316.1   |
| 20 | Gene Kdr     | 6130401C07, s kinase insert domain protein receptor                  | NM_010612.2      |
| 32 | Gene Srd5a3  | AW987574, Sr steroid 5 alpha-reductase 3                             | NM_020611.4      |
| 19 | Gene Tmem16  | pFT27, Tparl, T transmembrane protein 165                            | NM_011626.2      |
| 23 | Gene Clock   | Clock, bHLHe8 circadian locomotor output cycles kaput                | NM_007715.5      |
| 23 | Gene Gm7467  | Gm7467, EG6E predicted gene 7467                                     | XR_107695.1, XR_ |
| 23 | Gene Pdcl2   | 1700010B22Ri phosducin-like 2                                        | NM_023508.6      |
| 20 | Gene Nmu     | Nmu neuromedin U                                                     | NM_019515.1      |
| 25 | Gene Cep135  | Gm1044, BC0E centrosomal protein 135                                 | NM_199032.2      |
| 25 | Gene A730089 | A730089K16Ri RIKEN cDNA A730089K16 gene                              | XR_035383.2, XR_ |
| 30 | Gene Paics   | ADE2H1, PAIS, phosphoribosylaminoimidazole carboxylase, phosph       | NM_025939.2      |
| 30 | Gene Srp72   | 72kDa, Srp72, signal recognition particle 72                         | NM_025691.1      |
| 30 | Gene Rest    | MGC150099, 2RE1-silencing transcription factor                       | NM_011263.2      |
| 30 | Gene Mir5098 | Mir5098, mmu microRNA 5098                                           | NR_039557.1      |
| 31 | Gene Igfbp7  | Fstl2, Igfbp7, insulin-like growth factor binding protein 7          | NM_008048.3, NM  |
| 23 | Gene Lphn3   | CIRL-3, Gm137 latrophilin 3                                          | NM_198702.2      |

|    |                   |                                                                     |                 |
|----|-------------------|---------------------------------------------------------------------|-----------------|
| 24 | Gene Ythdc1       | A730098D12Ri YTH domain containing 1                                | NM_177680.3     |
| 27 | Gene Utp3         | C87704, Crlz1, UTP3, small subunit (SSU) processome component,      | NM_023054.1     |
| 19 | Gene Grsf1        | B130010H02, (G-rich RNA sequence binding factor 1                   | NM_178700.4, NM |
| 28 | Gene Mob1b        | B230364F10, MOB kinase activator 1B                                 | NM_026735.2     |
| 19 | Gene Adamts3      | Adamts3, 110C a disintegrin-like and metallopeptidase (reprolysin t | NM_001081401.2, |
| 33 | Gene Ankrd17      | A130069E23Ri ankyrin repeat domain 17                               | NM_198010.2, NM |
| 33 | Gene Gm9958       | ENSMUSG000(predicted gene 9958                                      | NR_045618.1     |
| 26 | Gene Rchy1        | Pirh2, Rchy1, ring finger and CHY zinc finger domain containing 1   | NM_026557.3     |
| 38 | Gene G3bp2        | KIAA0660, AA'GTPase activating protein (SH3 domain) binding pro     | NM_001080794.1  |
| 28 | Gene Uso1         | 115kDa, Uso1, USO1 vesicle docking factor                           | NM_019490.1     |
| 28 | Gene Gm1571       | Gm15710, OTI ribosomal protein L13 pseudogene                       |                 |
| 28 | Gene Sdad1        | 4931421J16, S SDA1 domain containing 1                              | NM_172713.2     |
| 28 | Gene Nup54        | Nup54, 31100' nucleoporin 54                                        | NM_183392.2     |
| 28 | Gene Scarb2       | LGP85, MLGP8 scavenger receptor class B, member 2                   | NM_007644.3     |
| 20 | Gene Sowahb       | Ankrd56, 5730 sosondowah ankyrin repeat domain family member        | NM_175270.4     |
| 28 | Gene Sept11       | D5Ertd606e, A septin 11                                             | NM_001009818.1  |
| 27 | Gene Ccni         | Ccni cyclin I                                                       | NM_017367.3     |
| 27 | Gene 2010109      | 2010109A12Ri RIKEN cDNA 2010109A12 gene                             | NM_029363.1     |
| 39 | Gene Ccng2        | MGC113793, C cyclin G2                                              | NM_007635.4     |
| 22 | Gene Cnot6l       | Cnot6l, 49324' CCR4-NOT transcription complex, subunit 6-like       | NM_144910.1, NM |
| 21 | Gene Fras1        | Fras1, mKIAA1 Fraser syndrome 1 homolog (human)                     | NM_175473.3     |
| 23 | Gene Gm9484       | Gm9484 predicted gene 9484                                          | XM_003945654.1, |
| 23 | Gene Bmp2k        | 4933417M22R BMP2 inducible kinase                                   | NM_080708.1     |
| 16 | Gene Paqr3        | AY424292, Pac progestin and adipoQ receptor family member III       | NM_198422.2     |
| 17 | Gene Naa11        | Ard2, C80008, N(alpha)-acetyltransferase 11, NatA catalytic subuni  | NM_001033191.2  |
| 17 | Gene 4930467      | BB013444, 49' RIKEN cDNA 4930467D21 gene                            | NR_045981.1     |
| 18 | Gene Antxr2       | 2310046B19Ri anthrax toxin receptor 2                               | NM_133738.1     |
| 21 | Gene Fgf5         | Fgf5, go, angor fibroblast growth factor 5                          | NM_010203.4     |
| 22 | Gene 1700007      | 4930428O21Ri RIKEN cDNA 1700007G11 gene                             | NM_001024614.1  |
| 35 | Gene Rasgef1l     | Gpig4, Rasgef1 RasGEF domain family, member 1B                      | NM_145839.2, NM |
| 21 | Gene A930011      | A930011G23R RIKEN cDNA A930011G23 gene                              | NR_030692.1     |
| 28 | Gene Hnrnpd       | Auf1, Hnrnpd, heterogeneous nuclear ribonucleoprotein D             | NM_001077265.1  |
| 28 | Gene LOC101055652 | uncharacterized LOC101055652                                        | XM_003946175.1, |
| 50 | Gene Hnrpd        | JKTBP, hnRNP- heterogeneous nuclear ribonucleoprotein D-like        | NM_016690.4     |
| 50 | Gene Enoph1       | 2310057D15Ri enolase-phosphatase 1                                  | NM_026421.3, NM |
| 43 | Gene Sec31a       | ABP125, HSPC: Sec31 homolog A (S. cerevisiae)                       | NM_026969.1     |
| 43 | Gene 5430416      | 100041797, Gr RIKEN cDNA 5430416N02 gene                            | NR_034038.1     |
| 26 | Gene Helq         | MGC105224, helicase, POLQ-like                                      | NM_001081107.1  |
| 26 | Gene Mrps18c      | Mrps18c, 111C mitochondrial ribosomal protein S18C                  | NM_026826.1     |
| 26 | Gene Fam175       | AV118690, Ccc family with sequence similarity 175, member A         | NM_172405.3     |
| 27 | Gene Wdfy3        | Ggtb3, Bchs, B WD repeat and FYVE domain containing 3               | NM_172882.3     |
| 27 | Gene LOC101055666 | uncharacterized LOC101055666                                        | XM_003945656.1, |
| 25 | Gene Aff1         | Mllt2h, Af4, A\AF4/FMR2 family, member 1                            | NM_133919.3, NM |
| 16 | Gene Klhl8        | D5Ert431e, MGC102224, 2310001P09Rik, Klhl8                          | NM_178741.3     |
| 23 | Gene Pkd2         | PC2, C030034F polycystic kidney disease 2                           | NM_008861.3     |
| 29 | Gene Lrrc8c       | fad158, Lrrc8c, leucine rich repeat containing 8 family, member C   | NM_133897.2     |
| 26 | Gene Lrrc8d       | 4930525N13Ri leucine rich repeat containing 8D                      | NM_178701.3, NM |

|    |                   |                                                                           |                  |
|----|-------------------|---------------------------------------------------------------------------|------------------|
| 22 | Gene Zfp644       | Zep-2, 111006: zinc finger protein 644                                    | NM_026856.2      |
| 22 | Gene LOC100504779 | uncharacterized LOC100504779                                              | XR_107723.1, XR_ |
| 27 | Gene Cdc7         | muCdc7, AI597: cell division cycle 7 ( <i>S. cerevisiae</i> )             | NM_009863.2      |
| 27 | Gene Tgfbr3       | TBRIII, AU0156: transforming growth factor, beta receptor III             | NM_011578.3      |
| 18 | Gene Evi5         | Evi5, NB45 ecotropic viral integration site 5                             | NM_007964.2      |
| 55 | Gene Rpl5         | MGC117998, Ribosomal protein L5                                           | NM_016980.2      |
| 55 | Gene Fam69a       | Fam69a, MGC: family with sequence similarity 69, member A                 | NM_026062.4      |
| 31 | Gene Dr1          | NC2, 1700121: down-regulator of transcription 1                           | NM_026106.4      |
| 18 | Gene Gm1041       | Gm10419, 633 predicted gene 10419                                         | XR_168625.1, XR_ |
| 24 | Gene Gak          | MGC31204, G <sub>1</sub> cyclin G associated kinase                       | NM_153569.1      |
| 24 | Gene Tmem17       | AI504381, Tm $\epsilon$ transmembrane protein 175                         | NM_028223.3, NM  |
| 22 | Gene Idua         | Idua, 6030426 iduronidase, alpha-L-                                       | NM_008325.3      |
| 22 | Gene Fgfr1        | FGFR5beta, FG fibroblast growth factor receptor-like 1                    | NM_054071.2, NM  |
| 25 | Gene Plcx1        | Gm576, Plcx1 phosphatidylinositol-specific phospholipase C, X dor         | NM_207279.2, NR  |
| 25 | Gene Gtpbp6       | PgbpII, Gtpbp6 GTP binding protein 6 (putative)                           | NM_145147.5      |
| 25 | Gene Zfp605       | MGC7438, A8 $\epsilon$ : zinc finger protein 605                          | NM_001163996.1   |
| 38 | Gene Golga3       | Mea-2, 53304: golgi autoantigen, golgin subfamily a, 3                    | NM_008146.3      |
| 38 | Gene Ankle2       | D5Ert585e, A ankyrin repeat and LEM domain containing 2                   | NM_001253814.1   |
| 42 | Gene Pgam5        | Pgam5, 26105: phosphoglycerate mutase family member 5                     | NM_028273.3, NM  |
| 42 | Gene Pxmp2        | 22kDa, Pxmp2 peroxisomal membrane protein 2                               | NM_008993.2      |
| 31 | Gene Lrcol1       | Gm1679, ClpsI leucine rich colipase-like 1                                | NM_001033459.3   |
| 31 | Gene Fbrs1        | Fbrs1, AI4675: fibrosin-like 1                                            | NM_028596.2, NM  |
| 40 | Gene Noc4l        | AI326906, MG nucleolar complex associated 4 homolog ( <i>S. cerevisi</i>  | NM_153570.2      |
| 40 | Gene Ddx51        | 2310061004Ri DEAD (Asp-Glu-Ala-Asp) box polypeptide 51                    | NM_027156.3      |
| 40 | Gene Ep400        | p400, AU0234: E1A binding protein p400                                    | NM_029337.2, NM  |
| 40 | Gene Gm1555       | OTTMUSG000i predicted gene 15559                                          | XR_168628.1, XR_ |
| 40 | Gene Pus1         | A730013B20Ri pseudouridine synthase 1                                     | NM_001025562.2   |
| 27 | Gene Ulk1         | Unc51.1, Ulk1, unc-51 like kinase 1                                       | NM_009469.3      |
| 18 | Gene Chek2        | Rad53, Cds1, HUCDS1, CHK2, Chek2                                          | NM_016681.3      |
| 25 | Gene Ttc28        | 2310015L07Ril tetratricopeptide repeat domain 28                          | NM_001267622.1   |
| 24 | Gene Pitpnb       | AU040890, Pit phosphatidylinositol transfer protein, beta                 | NM_019640.4      |
| 35 | Gene Mn1          | AA009236, Mr meningioma 1                                                 | NM_001081235.1   |
| 24 | Gene Crybb1       | BB1CRY, Crybb1 crystallin, beta B1                                        | NM_023695.2      |
| 24 | Gene Tpst2        | Tpst2, grm, D5 protein-tyrosine sulfotransferase 2                        | NM_009419.3      |
| 37 | Gene Ttip11       | TIP33, AW046: tuftelin interacting protein 11                             | NM_018783.4      |
| 19 | Gene Tmem21       | Tmem211, Gm transmembrane protein 211                                     | NM_001033428.2   |
| 16 | Gene Cmlr1        | DEZ, Cmlr1, G chemokine-like receptor 1                                   | NM_008153.3      |
| 33 | Gene Sart3        | Sart3, mKIAA0 squamous cell carcinoma antigen recognized by T ce          | NM_016926.1      |
| 33 | Gene Gm3511       | Gm3511 40S ribosomal protein S28 pseudogene                               |                  |
| 33 | Gene Iscu         | 2310020H20Ri IscU iron-sulfur cluster scaffold homolog ( <i>E. coli</i> ) | NM_025526.4      |
| 26 | Gene Coro1c       | AW548837, M coronin, actin binding protein 1C                             | NM_011779.3      |
| 33 | Gene Usp30        | D5Ert483e, 6 ubiquitin specific peptidase 30                              | NM_001033202.3   |
| 33 | Gene Alkbh2       | Alkbh2, mABH alkB, alkylation repair homolog 2 ( <i>E. coli</i> )         | NM_175016.2      |
| 33 | Gene Ung          | UNG2, Ung, Uf uracil DNA glycosylase                                      | NM_011677.2, NM  |
| 27 | Gene Kctd10       | MGC11654, Kc potassium channel tetramerisation domain containi            | NM_026145.4, NM  |
| 27 | Gene Ube3b        | AI449831, Ube ubiquitin protein ligase E3B                                | NM_054093.2      |
| 28 | Gene Mmab         | Mmab, ATR, 9: methylmalonic aciduria (cobalamin deficiency) type          | NM_029956.3      |

|    |              |                                                                   |                  |
|----|--------------|-------------------------------------------------------------------|------------------|
| 28 | Gene Mvk     | AI414037, MK, mevalonate kinase                                   | NM_023556.2      |
| 51 | Gene Fam222i | BC057022, MG family with sequence similarity 222, member A        | NM_001004180.1   |
| 32 | Gene Git2    | Git2, 6430510IG protein-coupled receptor kinase-interactor 2      | NM_001077359.1   |
| 32 | Gene 4930515 | 4930515G01RI RIKEN cDNA 4930515G01 gene                           | NR_027872.1      |
| 32 | Gene Ankrd13 | AU046136, 11ankyrin repeat domain 13a                             | NM_026718.2      |
| 32 | Gene Gm1934  | Gm19344 predicted gene, 19344                                     | XR_140745.1, XR_ |
| 30 | Gene 1500011 | 1500011B03RI RIKEN cDNA 1500011B03 gene                           | NR_027817.1, NR_ |
| 30 | Gene 2610524 | 2610524H06Rik                                                     | NM_181075.3      |
| 32 | Gene Sppl3   | Usmg3, 48334 signal peptide peptidase 3                           | NM_029012.2      |
| 33 | Gene Acads   | SCAD, AI1960C acyl-Coenzyme A dehydrogenase, short chain          | NM_007383.2      |
| 33 | Gene Unc119k | AA407659, Un unc-119 homolog B (C. elegans)                       | NM_175352.4      |
| 30 | Gene Mlec    | Mlec, ESTM19, malectin                                            | NM_175403.3      |
| 30 | Gene Cabp1   | Cabp1, calden calcium binding protein 1                           | NM_013879.2      |
| 34 | Gene Pop5    | 1500019J17Ril processing of precursor 5, ribonuclease P/MRP fami  | NM_026398.4      |
| 39 | Gene Rnf10   | RIE2, Rnf10, m ring finger protein 10                             | NM_016698.2      |
| 39 | Gene Coq5    | 1810014G04Ricoenzyme Q5 homolog, methyltransferase (yeast)        | NM_026504.2      |
| 38 | Gene Dynll1  | Dlc8, Dynll1, P dynein light chain LC8-type 1                     | NM_019682.4      |
| 33 | Gene Srsf9   | Sfrs9, SRp30c, serine/arginine-rich splicing factor 9             | NM_025573.3, NR  |
| 33 | Gene Gatc    | Gatc, 2010003 glutamyl-tRNA(Gln) amidotransferase, subunit C hor  | NM_029645.3      |
| 33 | Gene Triap1  | Triap1, AU020:TP53 regulated inhibitor of apoptosis 1             | NM_026933.2      |
| 33 | Gene Cox6a1  | Cox6a1, VlaL cytochrome c oxidase subunit VIa polypeptide 1       | NM_007748.3      |
| 24 | Gene Msi1    | Msi1h, Musahi musashi RNA-binding protein 1                       | NM_008629.1      |
| 24 | Gene 4930430 | 4930430O22RI RIKEN cDNA 4930430O22 gene                           | XR_168858.1, XR_ |
| 36 | Gene Pxn     | Pxn, AW12323 paxillin                                             | NM_011223.2, NM  |
| 31 | Gene Rplp0   | MGC107166, Ribosomal protein, large, P0                           | NM_007475.5      |
| 31 | Gene Gcn1l1  | mKIAA0219, G GCN1 general control of amino-acid synthesis 1-like  | NM_172719.2      |
| 26 | Gene 1110006 | 1110006O24RI RIKEN cDNA 1110006O24 gene                           | NR_027810.1      |
| 26 | Gene Rab35   | 9530019H02RIRAB35, member RAS oncogene family                     | NM_198163.1      |
| 33 | Gene Prkab1  | Prkab1, E4300 protein kinase, AMP-activated, beta 1 non-catalytic | NM_031869.2      |
| 33 | Gene Gm1384  | OTTMUSG000(predicted gene 13842                                   | XR_107734.1, XR_ |
| 24 | Gene Suds3   | AU067672, Sursuppressor of defective silencing 3 homolog (S. cere | NM_178622.4, NM  |
| 24 | Gene Taok3   | Taok3, A4301C TAO kinase 3                                        | NM_001081308.2   |
| 43 | Gene Gm1039  | ENSMUSG000(predicted gene 10399                                   | XR_168605.1, XR_ |
| 43 | Gene Vsig10  | Vsig10, BC023 V-set and immunoglobulin domain containing 10       | NM_001033311.3   |
| 30 | Gene Wsb2    | WSB-2, Swip2, WD repeat and SOCS box-containing 2                 | NM_021539.4      |
| 24 | Gene Rfc5    | MGC113787, 2 replication factor C (activator 1) 5                 | NM_028128.1      |
| 39 | Gene Fbxo21  | Fbxo21, AU01F-box protein 21                                      | NM_145564.3      |
| 26 | Gene Tesc    | 2410011K10Ri tescalcin                                            | NM_021344.3      |
| 28 | Gene Fbxw8   | FBW6, Fbxw8, F-box and WD-40 domain protein 8                     | NM_172721.2      |
| 17 | Gene Med13l  | Trap240L, 903mediator complex subunit 13-like                     | NM_172424.4      |
| 17 | Gene Tbx3    | D5Ert189e, T T-box 3                                              | NM_011535.2, NM  |
| 24 | Gene Plbd2   | P76, AU01981phospholipase B domain containing 2                   | NM_023625.4      |
| 24 | Gene Slc24a6 | AF261233, NCl solute carrier family 24 (sodium/potassium/calcium  | NM_133221.2, NM  |
| 24 | Gene Tpcn1   | 5730403B01Ri two pore channel 1                                   | NM_145853.2      |
| 24 | Gene Iqcd    | 4933433C09RI IQ motif containing D                                | NM_029408.2      |
| 30 | Gene Dtx1    | KIAA4160, Dtx deltex 1 homolog (Drosophila)                       | NM_008052.3      |
| 21 | Gene Ptpn11  | SH-PTP2, 2700 protein tyrosine phosphatase, non-receptor type 11  | NM_011202.3, NM  |

|    |              |                                                                                |                  |
|----|--------------|--------------------------------------------------------------------------------|------------------|
| 38 | Gene Rpl6    | Rpl6, Taxreb1C ribosomal protein L6                                            | NM_011290.5      |
| 23 | Gene Gm1580  | Gm15800, BCC predicted gene 15800                                              | NM_181421.4      |
| 32 | Gene Naa25   | Mdm20, C330N(alpha)-acetyltransferase 25, NatB auxiliary subunit               | NM_172722.3      |
| 43 | Gene Erp29   | Erp31, Erp28, endoplasmic reticulum protein 29                                 | NM_026129.2      |
| 43 | Gene Tmem114 | 930513P12Ri transmembrane protein 116                                          | NM_029912.2, NM  |
| 17 | Gene Mapkap1 | Mapkapk5, MAP kinase-activated protein kinase 5                                | NM_010765.2      |
| 35 | Gene Aldh2   | Ahd5, Ahd-5, aldehyde dehydrogenase 2, mitochondrial                           | NM_009656.3      |
| 35 | Gene Acad12  | Acad12, 93301 acyl-Coenzyme A dehydrogenase family, member 12                  | NM_178799.3      |
| 20 | Gene Acad10  | 2410021P16Ri acyl-Coenzyme A dehydrogenase family, member 10                   | NM_028037.4      |
| 20 | Gene Brap    | 3010002G07Ri BRCA1 associated protein                                          | NM_028227.2      |
| 20 | Gene Atxn2   | AW544490, At ataxin 2                                                          | NM_009125.2      |
| 30 | Gene Sh2b3   | Lnk, A1429800, SH2B adaptor protein 3                                          | NM_008507.3      |
| 22 | Gene Fam109  | Ses1, A230106 family with sequence similarity 109, member A                    | NM_175474.3      |
| 22 | Gene Cux2    | 1700051K22Ri cut-like homeobox 2                                               | NM_007804.2      |
| 25 | Gene Ppp1cc  | dis2m1, Ppp1c protein phosphatase 1, catalytic subunit, gamma isoform          | NM_013636.3      |
| 26 | Gene Tctn1   | Tctn1, G73003 tectonic family member 1                                         | NM_001039153.2   |
| 25 | Gene Pptc7   | AA672638, TA-PTC7 protein phosphatase homolog ( <i>S. cerevisiae</i> )         | NM_177242.4      |
| 24 | Gene Rad9b   | A630082N15Rik, BC021784, Rad9b, MGC28469                                       | NM_144912.3      |
| 30 | Gene Vps29   | AW049835, Vps29 vacuolar protein sorting 29 ( <i>S. pombe</i> )                | NM_019780.1      |
| 30 | Gene Fam216  | 1500011H22Ri family with sequence similarity 216, member A                     | NM_026883.3      |
| 30 | Gene Gpn3    | D5Ert708e, A GPN-loop GTPase 3                                                 | NM_024216.1      |
| 20 | Gene Arpc3   | p21-Ar, Arpc3, actin related protein 2/3 complex, subunit 3                    | NM_019824.3      |
| 22 | Gene Anapc7  | APC7, Anapc7, anaphase promoting complex subunit 7                             | NM_019805.4      |
| 28 | Gene Atp2a2  | D5Wsu150e, AATPase, Ca <sup>++</sup> transporting, cardiac muscle, slow twitch | NM_009722.3, NM  |
| 30 | Gene Camkk2  | AW061083, Ca calcium/calmodulin-dependent protein kinase kinase 2              | NM_145358.2, NM  |
| 43 | Gene Anapc5  | Anpc5, Anapc5 anaphase-promoting complex subunit 5                             | NM_021505.2, NM  |
| 27 | Gene Rnf34   | BC004042, MCRing finger protein 34                                             | NM_030564.1      |
| 21 | Gene Kdm2b   | Cxxc2, Kdm2b, lysine (K)-specific demethylase 2B                               | NM_001003953.1,  |
| 17 | Gene A930024 | A930024E05Ri RIKEN cDNA A930024E05 gene                                        | NR_045820.1      |
| 22 | Gene Gm2479  | Gm2479 predicted gene 2479                                                     | XR_168860.1, XR_ |
| 22 | Gene Orai1   | Tmem142a, DORAI calcium release-activated calcium modulator 1                  | NM_175423.3      |
| 30 | Gene Tmem12  | Tmem120b transmembrane protein 120B                                            | NM_001039723.2   |
| 37 | Gene Rhof    | Rhof, A184505 ras homolog gene family, member f                                | NM_175092.3      |
| 37 | Gene 4932422 | 4932422M17R RIKEN cDNA 4932422M17 gene                                         | XR_140744.2, XR_ |
| 37 | Gene Setd1b  | KMT2G, Setd1 SET domain containing 1B                                          | NM_001040398.2   |
| 28 | Gene Psmc9   | Bridge-1, Psmc proteasome (prosome, macropain) 26S subunit, non-ATPase         | NM_026000.2      |
| 23 | Gene Bcl7a   | Bcl7a, A144831B cell CLL/lymphoma 7A                                           | NM_029850.3      |
| 37 | Gene Diablo  | AU040403, 17L diablo homolog ( <i>Drosophila</i> )                             | NM_023232.3      |
| 37 | Gene Vps33a  | AW554476, 38 vacuolar protein sorting 33A (yeast)                              | NM_029929.3      |
| 33 | Gene Clip1   | mKIAA4046, CLIP-GLY domain containing linker protein 1                         | NM_019765.4      |
| 24 | Gene Rsrc2   | 1500011J06Ri arginine/serine-rich coiled-coil 2                                | NM_025438.1, NM  |
| 24 | Gene Kntc1   | Kntc1, D33001 kinetochore associated 1                                         | NM_001042421.1   |
| 29 | Gene Denr    | 1500003K04Ri density-regulated protein                                         | NM_026603.4      |
| 23 | Gene Vps37b  | A1415429, 230 vacuolar protein sorting 37B (yeast)                             | NM_177876.4      |
| 27 | Gene Ogfod2  | AW552395, A12-oxoglutarate and iron-dependent oxygenase domain                 | NM_025671.2      |
| 27 | Gene Arl6ip4 | AA408365, AA-ADP-ribosylation factor-like 6 interacting protein 4              | NM_144509.2      |
| 27 | Gene Pitpm2  | Pitpm2, Rdg phosphatidylinositol transfer protein, membrane-associated         | NM_011256.2      |

|    |               |                                                                     |                  |
|----|---------------|---------------------------------------------------------------------|------------------|
| 22 | Gene Mphosp   | MPP9, MPP-9, M-phase phosphoprotein 9                               | NM_001081323.1   |
| 22 | Gene Cdk2ap1  | ST19, Cdkap1, CDK2 (cyclin-dependent kinase 2)-associated protein   | NM_013812.2      |
| 27 | Gene Sbno1    | MGC28589, 93sno, strawberry notch homolog 1 (Drosophila)            | NM_001081203.1   |
| 43 | Gene Rilpl1   | GOSPEL, Rilpl1 Rab interacting lysosomal protein-like 1             | NM_021430.2      |
| 43 | Gene Tmed2    | 1110032D12Ri transmembrane emp24 domain trafficking protein 2       | NM_019770.2      |
| 26 | Gene Ddx55    | Ddx55, mKIAA DEAD (Asp-Glu-Ala-Asp) box polypeptide 55              | NM_001190795.1   |
| 24 | Gene Tctn2    | 4432405B04Ri tectonic family member 2                               | NM_026486.3      |
| 24 | Gene Atp6v0a  | 8430408C20Ri ATPase, H+ transporting, lysosomal V0 subunit A2       | NM_011596.4      |
| 31 | Gene Ccdc92   | D5Bwg0834e, coiled-coil domain containing 92                        | NM_144819.2      |
| 31 | Gene Zfp664   | D930038J03Ri zinc finger protein 664                                | NM_001081750.1   |
| 30 | Gene Ncor2    | N-CoR, SMRTe nuclear receptor co-repressor 2                        | NM_001253904.1   |
| 32 | Gene Scarb1   | Cd361, SRBI, scavenger receptor class B, member 1                   | NM_016741.2, NM  |
| 39 | Gene Ubc      | 2700054O04Ri ubiquitin C                                            | NM_019639.4      |
| 18 | Gene Tmem13   | Tmem132c, 28 transmembrane protein 132C                             | NM_175432.3      |
| 30 | Gene Slc15a4  | PHT1, C13006, solute carrier family 15, member 4                    | NM_133895.1      |
| 43 | Gene Ran      | Ran                                                                 | NM_009391.3      |
| 29 | Gene Sfwap    | SWAP, AW212 splicing factor, suppressor of white-apricot homolog    | NM_172276.3      |
| 18 | Gene Mmp17    | Mmp17, MT4- matrix metalloproteinase 17                             | NM_011846.4      |
| 25 | Gene Sept14   | Sept14, 17000 septin 14                                             | NM_028826.1      |
| 25 | Gene Mrps17   | Mprs17, Mrps: mitochondrial ribosomal protein S17                   | NM_025450.4      |
| 25 | Gene Gbas     | Gbas, Nipsnap glioblastoma amplified sequence                       | NM_008095.4      |
| 32 | Gene Psph     | Psph, PSPase, phosphoserine phosphatase                             | NM_133900.4      |
| 32 | Gene Cct6a    | Cct6a, Cct6, Cc chaperonin containing Tcp1, subunit 6a (zeta)       | NM_009838.1      |
| 32 | Gene Snora15  | MBI-79, Snora small nucleolar RNA, H/ACA box 15                     | NR_003681.1      |
| 22 | Gene Phkg1    | Phkg1, Phkg phosphorylase kinase gamma 1                            | NM_011079.2      |
| 22 | Gene Chchd2   | Chchd2, AL033 coiled-coil-helix-coiled-coil-helix domain containing | NM_024166.6      |
| 22 | Gene 2410018  | 2410018M08R RIKEN cDNA 2410018M08 gene                              | NM_183088.2      |
| 28 | Gene Rabgef1  | Rabgef1, Rabe RAB guanine nucleotide exchange factor (GEF) 1        | NM_019983.2, NM  |
| 28 | Gene Tmem24   | AW557951, A930023A16Rik, G430067H08Rik, 0610007L01Rik, Tme          | NM_001081394.1   |
| 28 | Gene Sbds     | CGI-97, AI836C Shwachman-Bodian-Diamond syndrome homolog (f         | NM_023248.1      |
| 28 | Gene Tyw1     | Rsafd1, AW12, tRNA-yW synthesizing protein 1 homolog (S. cerevis    | NM_178897.4, NM  |
| 27 | Gene Auts2    | Auts2, A73001 autism susceptibility candidate 2                     | NM_177047.3      |
| 19 | Gene Gatsl2   | 7530428J21Ri GATS protein-like 2                                    | NM_030719.3      |
| 30 | Gene Wbscr16  | Wbscr16, AU0 Williams-Beuren syndrome chromosome region 16          | NM_033572.2      |
| 30 | Gene Gtf2ird2 | 1700012P16Ri GTF2I repeat domain containing 2                       | NM_053266.1      |
| 20 | Gene Gtf2i    | TFII-I, 6030441 general transcription factor II I                   | NM_001080748.1   |
| 26 | Gene Clip2    | Cyln2, mKIAA0 CAP-GLY domain containing linker protein 2            | NM_001039162.1   |
| 26 | Gene Syna     | syncytin-A, Gr syncytin a                                           | NM_001013751.2   |
| 33 | Gene Eif4h    | Wscr1, AU018, eukaryotic translation initiation factor 4H           | NM_033561.1      |
| 24 | Gene Limk1    | Limk1 LIM-domain containing, protein kinase                         | NM_010717.2      |
| 24 | Gene Gm1036   | ENSMUSG000 (predicted gene 10369                                    | XR_140754.1, XR_ |
| 19 | Gene Stx1a    | Stx1a, HPC-1 syntaxin 1A (brain)                                    | NM_016801.3      |
| 33 | Gene Wbscr22  | MGC144443, 1 Williams Beuren syndrome chromosome region 22          | NM_025375.3      |
| 33 | Gene Dnajc30  | Wbscr18, Dnaj DnaJ (Hsp40) homolog, subfamily C, member 30          | NM_025362.3      |
| 33 | Gene Vps37d   | Wbscr24, Vps vacuolar protein sorting 37D (yeast)                   | NM_001199677.1   |
| 23 | Gene Mlxip    | ChREBP, Mlxip MLX interacting protein-like                          | NM_021455.4      |
| 32 | Gene Tbl2     | C76179, WS-b transducin (beta)-like 2                               | NM_013763.2      |



|    |              |              |                                                              |                 |
|----|--------------|--------------|--------------------------------------------------------------|-----------------|
| 46 | Gene Bcl7b   | Bcl7b        | B cell CLL/lymphoma 7B                                       | NM_009745.2     |
| 46 | Gene Baz1b   | WSTF, Baz1b, | (bromodomain adjacent to zinc finger domain, 1B              | NM_011714.2     |
| 33 | Gene Fzd9    | Fzd9, mzf9   | frizzled homolog 9 (Drosophila)                              | NM_010246.1     |
| 17 | Gene Pom121  | mKIAA0618,   | C nuclear pore membrane protein 121                          | NM_148932.2     |
| 18 | Gene Hip1    | MGC27616,    | A huntingtin interacting protein 1                           | NM_146001.2     |
| 29 | Gene Por     | CYPOR,       | 49334:P450 (cytochrome) oxidoreductase                       | NM_008898.1     |
| 29 | Gene Tmem12  | Tmem120a,    | 2C transmembrane protein 120A                                | NM_172541.2     |
| 29 | Gene Styx1   | Dusp24,      | 1700C serine/threonine/tyrosine interacting-like 1           | NM_029659.4     |
| 22 | Gene Mdh2    | MDH, Mdh2,   | 1 malate dehydrogenase 2, NAD (mitochondrial)                | NM_008617.2     |
| 23 | Gene Ywhag   | 14-3-3gamma, | tyrosine 3-monooxygenase/tryptophan 5-monooxyg               | NM_018871.3     |
| 28 | Gene Sh2b2   | Aps, Sh2b2   | SH2B adaptor protein 2                                       | NM_018825.3     |
| 29 | Gene Cux1    | KIAA4047,    | Cux cut-like homeobox 1                                      | NM_198602.2, NM |
| 17 | Gene Col26a1 | Col26a,      | 9430032K24Rik, MGC7475, Col26a1, Emid2, BC002218             | NM_024474.2     |
| 25 | Gene Rabl5   | 3110017O03Ri | RAB, member of RAS oncogene family-like 5                    | NM_026073.3     |
| 26 | Gene Znhit1  | 2700001K05Ri | zinc finger, HIT domain containing 1                         | NM_027318.3     |
| 26 | Gene Plod3   | AI414586,    | Ploc procollagen-lysine, 2-oxoglutarate 5-dioxygenase 3      | NM_011962.3     |
| 26 | Gene Mir702  | mmu-mir-702, | microRNA 702                                                 | NR_030483.1     |
| 21 | Gene Vgf     | Gm1052,      | Vgf VGF nerve growth factor inducible                        | NM_001039385.1  |
| 21 | Gene Ap1s1   | Ap1s1, AP19  | adaptor protein complex AP-1, sigma 1                        | NM_007457.2     |
| 23 | Gene Ache    | mE1b,        | mE1c-lc acetylcholinesterase                                 | NM_009599.3     |
| 23 | Gene Ufsp1   | Ufsp1,       | 270003 UFM1-specific peptidase 1                             | NM_027356.2     |
| 23 | Gene Srrt    | Ars2, Asr2,  | 281 serrate RNA effector molecule homolog (Arabidopsi        | NM_031405.2, NM |
| 23 | Gene Trip6   | Trip6        |                                                              | NM_011639.3     |
| 23 | Gene Slc12a9 | Slc12a9,     | CIP1 solute carrier family 12 (potassium/chloride transpo    | NM_031406.3     |
| 25 | Gene Ephb4   | Tyro11,      | Ephb4 Eph receptor B4                                        | NM_010144.6, NM |
| 22 | Gene Pop7    | AI852017,    | 061 processing of precursor 7, ribonuclease P family, (S.    | NM_028753.2     |
| 33 | Gene Gigyf1  | KIAA4110,    | mKI GRB10 interacting GYF protein 1                          | NM_031408.2     |
| 33 | Gene Gnb2    | Gnb-2,       | Gnb2 guanine nucleotide binding protein (G protein), beta    | NM_010312.4     |
| 30 | Gene Fbxo24  | Fbx24,       | Fbxo24 F-box protein 24                                      | NM_027708.1     |
| 30 | Gene Lrch4   | LRN,         | LRRN4, Lr leucine-rich repeats and calponin homology (CH) do | NM_146164.2, NM |
| 30 | Gene Gm2060  | Lrch4-sap25, | C predicted gene 20605                                       | NR_033148.1     |
| 24 | Gene Nyap1   | NYAP1,       | 64305! neuronal tyrosine-phosphorylated phosphoinositide     | NM_175521.3     |
| 24 | Gene Tsc22d4 | 1700023B23Ri | TSC22 domain family, member 4                                | NM_023910.6, NM |
| 30 | Gene Ppp1r35 | 2010011D20Ri | protein phosphatase 1, regulatory subunit 35                 | NM_027242.4     |
| 30 | Gene Mepce   | Bcdin3,      | MGC2 methylphosphate capping enzyme                          | NM_144913.3     |
| 30 | Gene Zcwpw1  | Gm1053,      | MGC zinc finger, CW type with PWWP domain 1                  | NM_001005426.2  |
| 27 | Gene Zkscan1 | PHZ-37,      | AI646: zinc finger with KRAB and SCAN domains 1              | NM_029869.1, NM |
| 36 | Gene Cops6   | VIP/MOV34,   | C COP9 (constitutive photomorphogenic) homolog, su           | NM_012002.3     |
| 36 | Gene Mcm7    | Mcm7,        | AI7475 minichromosome maintenance deficient 7 (S. cerevi     | NM_008568.2     |
| 36 | Gene Mir25   | Mir25,       | Mirn25 microRNA 25                                           | NR_029787.1     |
| 36 | Gene Mir93   | Mirn93,      | Mir93 microRNA 93                                            | NR_029749.1     |
| 36 | Gene Mir106b | Mirn106b,    | Mir microRNA 106b                                            | NR_029658.1     |
| 36 | Gene Ap4m1   | 4930443L05Ri | l adaptor-related protein complex AP-4, mu 1                 | NM_021392.4     |
| 36 | Gene Taf6    | Taf2e,       | TAFII70, TAF6 RNA polymerase II, TATA box binding protein (  | NM_009315.3     |
| 22 | Gene Lamtor4 | 0910001L09Ri | late endosomal/lysosomal adaptor, MAPK and MTO               | NM_001081108.2  |
| 22 | Gene BC03703 | MGC47434,    | BC cDNA sequence BC037034                                    | NM_153161.3     |
| 22 | Gene 6330418 | 6330418K02Ri | RIKEN cDNA 6330418K02 gene                                   | NR_045821.1     |

|    |              |                                                                      |                  |
|----|--------------|----------------------------------------------------------------------|------------------|
| 22 | Gene Gal3st4 | 1500031A01Ri galactose-3-O-sulfotransferase 4                        | NM_001033416.2   |
| 22 | Gene Gpc2    | 2410016G05Ri glypican 2 (cerebroglycan)                              | NM_172412.2      |
| 27 | Gene Zfp157  | 2610020C11Ri zinc finger protein 157                                 | NM_028130.3      |
| 32 | Gene Fam20c  | DMP4, GEF-CK family with sequence similarity 20, member C            | NM_030565.6      |
| 30 | Gene Pdgfa   | Pdgfa                                                                | NM_008808.3      |
| 31 | Gene Heatr2  | C76907, MGC6 HEAT repeat containing 2                                | NM_001081265.1   |
| 43 | Gene Sun1    | Sun1, KIAA081 Sad1 and UNC84 domain containing 1                     | NM_001256115.1   |
| 15 | Gene Cyp2w1  | Cyp2w1, Gm4 cytochrome P450, family 2, subfamily w, polypeptid       | NM_001160265.1   |
| 38 | Gene 3110082 | AW411904, 31 RIKEN cDNA 3110082I17 gene                              | NM_028469.3      |
| 38 | Gene Mir339  | Mir339, Mirn3 microRNA 339                                           | NR_029768.1      |
| 38 | Gene D830046 | D830046C22Ri RIKEN cDNA D830046C22 gene                              | NR_033147.1      |
| 38 | Gene Gpr146  | BC003323, PGIG protein-coupled receptor 146                          | NM_030258.4, NM  |
| 23 | Gene Zfand2a | Airap, Zfand2a zinc finger, AN1-type domain 2A                       | NM_133349.3, NM  |
| 21 | Gene 4930500 | 4930500L23Ri RIKEN cDNA 4930500L23 gene                              | NR_040701.1      |
| 21 | Gene Uncx    | Chx4, Uncx, Ur UNC homeobox                                          | NM_013702.3      |
| 25 | Gene Ints1   | 1110015K06Ri integrator complex subunit 1                            | NM_026748.2      |
| 29 | Gene Mafk    | Mafk, AW0610 v-maf musculoaponeurotic fibrosarcoma oncogene          | NM_010757.2      |
| 20 | Gene Tmem18  | MGC37596, Sc transmembrane protein 184a                              | NM_144914.3, NM  |
| 23 | Gene Psmg3   | 4930403H09Ri proteasome (prosome, macropain) assembly chaper         | NM_025604.3      |
| 18 | Gene Eln1    | Elf1, A93001 leucine rich repeat and fibronectin type III, extracell | NM_175522.3      |
| 20 | Gene Mad1l1  | AW550425, AI MAD1 mitotic arrest deficient 1-like 1                  | NM_010752.3      |
| 20 | Gene Ftsj2   | 2310037B18Ri FtsJ homolog 2 (E. coli)                                | NM_026510.1      |
| 20 | Gene Nudt1   | Mth1, Nudt1 nudix (nucleoside diphosphate linked moiety X)-type      | NM_008637.1      |
| 31 | Gene Eif3b   | EIF3-P116, EIF eukaryotic translation initiation factor 3, subunit B | NM_133916.2      |
| 37 | Gene Lfng    | AW061165, Lfi LFNG O-fucosylpeptide 3-beta-N-acetylglucosaminyl      | NM_008494.3      |
| 37 | Gene Gm1009  | ENSMUSG000 (predicted gene 10091                                     | XR_140758.1, XR_ |
| 35 | Gene Ttyh3   | AI414930, 290 tweety homolog 3 (Drosophila)                          | NM_175274.4      |
| 36 | Gene Iqce    | mKIAA1023, Iq IQ motif containing E                                  | NM_028833.3      |
| 36 | Gene Brat1   | Brat1, AA8814 BRCA1-associated ATM activator 1                       | NM_181066.2, NM  |
| 27 | Gene Gna12   | AI504261, Gna guanine nucleotide binding protein, alpha 12           | NM_010302.2      |
| 40 | Gene Foxk1   | A630048H08R forkhead box K1                                          | NM_199068.2      |
| 40 | Gene Ap5z1   | KIAA0415, C33 adaptor-related protein complex 5, zeta 1 subunit      | NM_172725.2      |
| 34 | Gene Radil   | AI536456, Rad Ras association and DIL domains                        | NM_178702.3      |
| 51 | Gene Tnrc18  | EG381742, Zfp trinucleotide repeat containing 18                     | NM_178242.2, NM  |
| 40 | Gene Fbxl18  | C330021B20Ri F-box and leucine-rich repeat protein 18                | NM_001033312.3   |
| 40 | Gene Actb    | Actb, E430023 actin, beta                                            | NM_007393.3      |
| 55 | Gene Fscn1   | Fan1, Fscn1, A fascin homolog 1, actin bundling protein (Strongyloc  | NM_007984.2      |
| 27 | Gene Zfp12   | Zfp-12, Znf12, zinc finger protein 12                                | NM_177681.3      |
| 27 | Gene Zfp316  | Znf316, Emzf1, zinc finger protein 316                               | NM_017467.3      |
| 20 | Gene Zfp853  | Zfp853, Gm79 zinc finger protein 853                                 | XM_001479487.3,  |
| 35 | Gene E130309 | A630028N22, RIKEN cDNA E130309D02 gene                               | NM_172726.4      |
| 35 | Gene Zdhhc4  | 1810021D01Ri zinc finger, DHHC domain containing 4                   | NM_028379.5      |
| 30 | Gene 0610040 | 0610040B10Ri RIKEN cDNA 0610040B10 gene                              | NR_027874.1      |
| 33 | Gene Kdelr2  | 1110007A14Ri KDEL (Lys-Asp-Glu-Leu) endoplasmic reticulum prote      | NM_025841.4      |
| 30 | Gene Rac1    | D5Ert559e, A RAS-related C3 botulinum substrate 1                    | NM_009007.2      |
| 32 | Gene Cyth3   | KIAA4241, ARN cytohesin 3                                            | NM_011182.4, NM  |
| 20 | Gene Ccz1    | MGC56855, AI CCZ1 vacuolar protein trafficking and biogenesis ass    | NM_177682.3      |

|    |                   |                                                                        |                  |
|----|-------------------|------------------------------------------------------------------------|------------------|
| 20 | Gene Ocm          | Ocm                                                                    | NM_033039.3      |
| 28 | Gene Lmtk2        | KPI-2, BREK, Lr lemur tyrosine kinase 2                                | NM_001081109.1   |
| 21 | Gene Bri3         | Bri3, I3 brain protein I3                                              | NM_018772.4, NM  |
| 21 | Gene Baiap2l1     | 1300006M19R BAI1-associated protein 2-like 1                           | NM_025833.3      |
| 20 | Gene 4930568      | 4930568B11Ri RIKEN cDNA 4930568B11 gene                                | XM_003945396.1   |
| 20 | Gene Nptx2        | Narp, np2, Npt neuronal pentraxin 2                                    | NM_016789.3      |
| 28 | Gene Tmem13       | C130036G08, T transmembrane protein 130                                | NM_177735.4      |
| 28 | Gene Trrap        | Trrap, AI4815C transformation/transcription domain-associated pro      | NM_001081362.1   |
| 22 | Gene Smurf1       | mKIAA1625, 4 SMAD specific E3 ubiquitin protein ligase 1               | NM_029438.3, NM  |
| 30 | Gene Arpc1a       | 1110030K07Ri actin related protein 2/3 complex, subunit 1A             | NM_019767.2      |
| 30 | Gene Arpc1b       | 41kDa, AA408 actin related protein 2/3 complex, subunit 1B             | NM_023142.2      |
| 36 | Gene Pdap1        | HASPP28, PAP, PDGFA associated protein 1                               | NM_001033313.3   |
| 36 | Gene Bud31        | G10, EDG-2, EI BUD31 homolog (yeast)                                   | NM_001008705.1   |
| 36 | Gene Ptdc1        | 1110069M14R pentatricopeptide repeat domain 1                          | NM_133735.2      |
| 18 | Gene Cpsf4        | MGC36996, C cleavage and polyadenylation specific factor 4             | NM_178576.2      |
| 27 | Gene Zkscan5      | AI326970, Zksc zinc finger with KRAB and SCAN domains 5                | NM_016683.2, NM  |
| 27 | Gene Zfp655       | mKIAA4222, K zinc finger protein 655                                   | NM_028298.3, NM  |
| 32 | Gene Zscan25      | EG666311, Zsc zinc finger and SCAN domain containing 25                | NM_001081431.1   |
| 25 | Gene Rnf6         | 1200013I08Ri ring finger protein (C3H2C3 type) 6                       | NM_001256085.1   |
| 25 | Gene Cdk8         | Cdk8, MGC371 cyclin-dependent kinase 8                                 | NM_153599.3      |
| 38 | Gene Rpl21        | MGC107587, L ribosomal protein L21                                     | NM_019647.6      |
| 24 | Gene Gtf3a        | 5330403M05R general transcription factor III A                         | NM_025652.3      |
| 24 | Gene Mtif3        | Mtif3, 281001 mitochondrial translational initiation factor 3          | NM_001256100.1   |
| 26 | Gene Lnx2         | Ln timer, 9630046 ligand of numb-protein X 2                           | NM_080795.4      |
| 26 | Gene Polr1d       | Rpo1-3, MGC1 polymerase (RNA) I polypeptide D                          | NM_009087.1, NM  |
| 26 | Gene D5Ert6       | D5Ert605e, G DNA segment, Chr 5, ERATO Doi 605, expressed              | NR_033625.1      |
| 26 | Gene Pan3         | 2700050F09Ri PAN3 polyA specific ribonuclease subunit homolog (        | NM_028291.4      |
| 16 | Gene Flt1         | Flt-1, sFlt1, AI3 FMS-like tyrosine kinase 1                           | NM_010228.3      |
| 29 | Gene Pomp         | 2510048O06Ri proteasome maturation protein                             | NM_025624.2      |
| 41 | Gene Slc7a1       | Slc7a1, Cat1, R solute carrier family 7 (cationic amino acid transport | NM_007513.4      |
| 31 | Gene Katnal1      | MGC40859, K katanin p60 subunit A-like 1                               | NM_153572.2      |
| 25 | Gene Hmgb1        | MGC117896, H high mobility group box 1                                 | NM_010439.3      |
| 22 | Gene 2310047      | 2310047D07Ri RIKEN cDNA 2310047D07 gene                                | XR_107763.1, XR_ |
| 29 | Gene Hsp1         | Hsp105, Hsp11 heat shock 105kDa/110kDa protein 1                       | NM_013559.2      |
| 29 | Gene Gm2000       | Gm20005 predicted gene, 20005                                          | XR_107764.1, XR_ |
| 20 | Gene Gm5566       | Gm5566, EG4 predicted pseudogene 5566                                  | XM_975873.3, XM  |
| 20 | Gene B3galt1      | B3galt1, Gm10 beta 1,3-galactosyltransferase-like                      | NM_001081204.1   |
| 20 | Gene N4bp2l1      | AI428195, 241 NEDD4 binding protein 2-like 1                           | NM_133898.4      |
| 25 | Gene N4bp2l2      | zag1, 2700092 NEDD4 binding protein 2-like 2                           | NM_201369.3      |
| 25 | Gene Pds5b        | Aprin, AS3, AV PDS5, regulator of cohesion maintenance, homolog        | NM_175310.6      |
| 26 | Gene Kl           | alpha-kl, Kl klotho                                                    | NM_013823.2      |
| 19 | Gene Casd1        | Cas1, MGC684 CAS1 domain containing 1                                  | NM_145398.2      |
| 26 | Gene Gm9835       | ENSMUSG000 predicted pseudogene 9835                                   | XM_003086510.1,  |
| 26 | Gene Ppp1r9a      | 5330407E15, P protein phosphatase 1, regulatory (inhibitor) subuni     | NM_181595.3      |
| 24 | Gene Slc25a13     | Ctrn, Slc25a13 solute carrier family 25 (mitochondrial carrier, aden   | NM_001177572.1,  |
| 24 | Gene LOC101056138 | uncharacterized LOC101056138                                           | XM_003945398.1,  |
| 19 | Gene Dlx5         | Dlx5, AI385752 distal-less homeobox 5                                  | NM_010056.2, NM  |

|    |               |                                                                       |                  |
|----|---------------|-----------------------------------------------------------------------|------------------|
| 34 | Gene Mios     | Mios, MGC255 missing oocyte, meiosis regulator, homolog (Drosop       | NM_145374.2      |
| 18 | Gene Phf14    | 5730446A07Ri PHD finger protein 14                                    | NM_001168382.1   |
| 18 | Gene Tmem106B | AI661344, 643 transmembrane protein 106B                              | NM_027992.3      |
| 36 | Gene Tmem168  | 8430437G11Ri transmembrane protein 168                                | NM_028990.4      |
| 18 | Gene Gpr85    | 2900026B03Ri G protein-coupled receptor 85                            | NM_145066.4      |
| 21 | Gene Foxp2    | Foxp2, 281004 forkhead box P2                                         | NM_212435.1, NM  |
| 22 | Gene Mdfic    | Mdfic, Mdfid, IMyoD family inhibitor domain containing                | NM_175088.5      |
| 22 | Gene Gm1547   | OTTMUSG000I predicted gene 15473                                      | XR_107770.1, XR_ |
| 22 | Gene Tes      | testin2, Tes2, I testis derived transcript                            | NM_207176.3      |
| 21 | Gene Ctnnbp2  | ORF4, AU0408 cortactin binding protein 2                              | NM_080285.1      |
| 19 | Gene Kcnd2    | Kcnd2, mKIAA: potassium voltage-gated channel, Shal-related famil     | NM_019697.3      |
| 25 | Gene Wasl     | Wasl, 2900021Wiskott-Aldrich syndrome-like (human)                    | NM_028459.2, NM  |
| 18 | Gene Tmem229a | Tmem229a, 63 transmembrane protein 229A                               | NM_177013.3      |
| 18 | Gene Gpr37    | Gpr37, Pael-R, G protein-coupled receptor 37                          | NM_010338.2      |
| 25 | Gene Zfp800   | Znf800, AA407 zinc finger protein 800                                 | NM_001081678.1   |
| 24 | Gene Snd1     | Snd1, AL03331 staphylococcal nuclease and tudor domain containir      | NM_019776.2      |
| 24 | Gene Lrrc4    | Lrrc4, Nag14, I leucine rich repeat containing 4                      | NM_138682.2      |
| 20 | Gene Rbm28    | AI503051, MG RNA binding motif protein 28                             | NM_133925.2      |
| 20 | Gene Prrt4    | D330027H18R proline-rich transmembrane protein 4                      | NM_001101443.1   |
| 34 | Gene Ccdc136  | MGC8047, Ccd coiled-coil domain containing 136                        | NM_001201378.1   |
| 34 | Gene Flnc     | 1110055E19Ri filamin C, gamma                                         | NM_001081185.1   |
| 24 | Gene Irf5     | mirf5, Irf5, AW interferon regulatory factor 5                        | NM_001252382.1,  |
| 29 | Gene Smo      | smoothened, S smoothened homolog (Drosophila)                         | NM_176996.4      |
| 20 | Gene Ahcyl2   | KIAA0828, AI2: S-adenosylhomocysteine hydrolase-like 2                | NM_001171001.1   |
| 18 | Gene Nrf1     | C87038, D6Ert nuclear respiratory factor 1                            | NM_001164226.1   |
| 18 | Gene Ube2h    | Ubc8, 1500009 ubiquitin-conjugating enzyme E2H                        | NM_009459.3, NM  |
| 27 | Gene Mest     | Mest, AI25674 mesoderm specific transcript                            | NM_001252292.1   |
| 27 | Gene Mir335   | mmu-mir-335, microRNA 335                                             | NR_029900.1      |
| 27 | Gene Copg2    | AW227625, Cc coatomer protein complex, subunit gamma 2                | NM_017478.2      |
| 22 | Gene Klf14    | 5330411L03Ril Kruppel-like factor 14                                  | NM_001135093.1   |
| 23 | Gene Gm1384   | OTTMUSG000I predicted gene 13845                                      | NR_040300.1      |
| 23 | Gene Mkn1     | Mkn1, AU015I muskelin 1, intracellular mediator containing kelch r    | NM_013791.2      |
| 22 | Gene Podxl    | PC, Ly102, AW podocalyxin-like                                        | NM_013723.3      |
| 33 | Gene Slc35b4  | AW494345, AE solute carrier family 35, member B4                      | NM_021435.3      |
| 30 | Gene Akr1b3   | Akr1b1, Aldr1, aldo-keto reductase family 1, member B3 (aldose re     | NM_009658.3      |
| 23 | Gene Cald1    | MGC30319, Cα caldesmon 1                                              | NM_145575.3      |
| 23 | Gene Agbl3    | Agbl3, 653040 ATP/GTP binding protein-like 3                          | NM_178630.3      |
| 29 | Gene Nup205   | mKIAA0225, 3I nucleoporin 205                                         | NM_027513.1      |
| 32 | Gene Mtpn     | Mtpn, Gcdp, V myotrophin                                              | NM_008098.4      |
| 37 | Gene Creb3l2  | BBF2H7, Creb3 cAMP responsive element binding protein 3-like 2        | NM_178661.4      |
| 31 | Gene Trim24   | TIF1, D430004 tripartite motif-containing 24                          | NM_145076.3      |
| 31 | Gene Zc3hav1  | E430016P22Ri zinc finger CCCH-type, antiviral 1-like                  | NM_172467.3      |
| 36 | Gene Zc3hav1  | ARTD13, Zc3hα zinc finger CCCH type, antiviral 1                      | NM_028864.2, NM  |
| 36 | Gene Ttc26    | 9430097H08Ri tetratricopeptide repeat domain 26                       | NM_153600.2      |
| 36 | Gene Ubn2     | mKIAA2030, D ubinuclein 2                                             | NM_177185.4      |
| 21 | Gene Klrg2    | Klrg2, 231002C killer cell lectin-like receptor subfamily G, member 2 | NM_001033171.2   |
| 29 | Gene Hipk2    | B230339E18Ri homeodomain interacting protein kinase 2                 | NM_010433.2, NM  |

|    |                   |                                                                      |                  |
|----|-------------------|----------------------------------------------------------------------|------------------|
| 21 | Gene Parp12       | Zc3hdc1, ARTC poly (ADP-ribose) polymerase family, member 12         | NM_172893.3      |
| 21 | Gene 4930599      | 4930599N23Ri RIKEN cDNA 4930599N23 gene                              | NR_045813.1      |
| 32 | Gene Jhdm1d       | BB041802, EN: jumonji C domain-containing histone demethylase 1      | NM_001033430.4   |
| 24 | Gene Slc37a3      | Slc37a3, 26105 solute carrier family 37 (glycerol-3-phosphate transp | NM_028123.3      |
| 24 | Gene Rab19        | Rab19 RAB19, member RAS oncogene family                              | NM_011226.1      |
| 31 | Gene Mkrn1        | RFP, Mkrn1 makorin, ring finger protein, 1                           | NM_018810.2      |
| 18 | Gene Dennd2a      | C130031G22, r DENN/MADD domain containing 2A                         | NM_172477.4      |
| 16 | Gene Braf         | Braf2, Braf, C8 Braf transforming gene                               | NM_139294.5      |
| 32 | Gene Zyx          | 9530098H06Ri zyxin                                                   | NM_011777.2      |
| 32 | Gene Epha1        | Eph, 5730453L Eph receptor A1                                        | NM_023580.4      |
| 23 | Gene A930035      | A930035D04Ri RIKEN cDNA A930035D04 gene                              | XM_003945405.1,  |
| 23 | Gene Cul1         | Cul1                                                                 | NM_012042.3      |
| 23 | Gene Ezh2         | Ezh2, Enx-1, Kl enhancer of zeste homolog 2 (Drosophila)             | NM_007971.2, NM  |
| 32 | Gene Zfp786       | Zfp786, A7300 zinc finger protein 786                                | NM_177882.4      |
| 32 | Gene Zfp398       | 6430539K21, Z zinc finger protein 398                                | NM_027477.3, NM  |
| 19 | Gene Zfp282       | E430019K09Ri zinc finger protein 282                                 | NM_146175.3      |
| 34 | Gene Zfp212       | Zfp212, Znf212 Zinc finger protein 212                               | NM_145576.2, NM  |
| 26 | Gene Zfp783       | A230106D06Ri zinc finger protein 783                                 | NR_027963.1      |
| 26 | Gene Zfp956       | AI894139, Zfp9 zinc finger protein 956                               | NM_178898.4      |
| 32 | Gene Zfp777       | 2500002G23Ri zinc finger protein 777                                 | NM_001081382.1   |
| 25 | Gene Zfp467       | MNCb-3350, 1 zinc finger protein 467                                 | NM_001085417.1   |
| 25 | Gene Sspo         | Scospondin, C:SCO-spondin                                            | NM_173428.3      |
| 29 | Gene Gm5111       | EG330305, M: predicted gene 5111                                     | NM_183309.3      |
| 29 | Gene Repin1       | Ap4, AI425994 replication initiator 1                                | NM_001079901.1   |
| 33 | Gene Malsu1       | Malsu1, 24100 mitochondrial assembly of ribosomal large subunit 1    | NM_029353.1      |
| 23 | Gene Igf2bp3      | MGC61294, A: insulin-like growth factor 2 mRNA binding protein 3     | NM_023670.3      |
| 31 | Gene Tra2a        | mAWMS1, G4: transformer 2 alpha homolog (Drosophila)                 | NM_198102.2      |
| 20 | Gene Osbpl3       | 1200014M06R oxysterol binding protein-like 3                         | NM_027881.3, NM  |
| 19 | Gene 5430402      | 5430402O13Ri RIKEN cDNA 5430402O13 gene                              | NR_015581.1, NR_ |
| 19 | Gene 4921507      | TISP74, 4921507Ri RIKEN cDNA 4921507P07 gene                         | NM_027564.3      |
| 40 | Gene Mir148a      | Mirn148a, Mir microRNA 148a                                          | NR_029719.1      |
| 19 | Gene Nfe2l3       | Nrf3, Nfe2l3 nuclear factor, erythroid derived 2, like 3             | NM_010903.1      |
| 21 | Gene Hoxa1        | Hoxa1, Hox-1.1 homeobox A1                                           | NM_010449.4      |
| 21 | Gene Gm1505       | Gm15051, OT: predicted gene 15051                                    | XR_107796.1, XR_ |
| 21 | Gene Hoxa2        | MGC151482, H homeobox A2                                             | NM_010451.1      |
| 21 | Gene LOC100503966 | uncharacterized LOC100503966                                         | XM_003084645.2,  |
| 22 | Gene Hoxa3        | Hoxa3, Mo-10, homeobox A3                                            | NM_010452.3      |
| 22 | Gene 2700086      | 2700086A05Ri RIKEN cDNA 2700086A05 gene                              | NR_015611.2      |
| 22 | Gene Hoxa5        | Hox-1.3, Hoxa5 homeobox A5                                           | NM_010453.5      |
| 22 | Gene Hoxa6        | Hox-1.2, Hoxa6 homeobox A6                                           | NM_010454.1      |
| 22 | Gene Mira         | Mira mistral long non-coding RNA                                     | NR_045199.1      |
| 22 | Gene Hoxa7        | AV118143, Ho: homeobox A7                                            | NM_010455.2      |
| 22 | Gene Hoxa9        | Hoxa9, D6a9, H homeobox A9                                           | NM_010456.2      |
| 22 | Gene Mir196b      | Mirn196b, Mir microRNA 196b                                          | NR_029912.1      |
| 22 | Gene Hoxa10       | Hox-1.8, Hoxa10 homeobox A10                                         | NM_008263.3, NM  |
| 16 | Gene Hoxa11       | Hoxa11, Hox-1 homeobox A11                                           | NM_010450.2      |
| 30 | Gene Hibadh       | AI265272, Hib: 3-hydroxyisobutyrate dehydrogenase                    | NM_145567.1      |

|    |              |                |                                                                  |                 |
|----|--------------|----------------|------------------------------------------------------------------|-----------------|
| 32 | Gene Tax1bp1 | 1200003J11Ri   | Tax1 (human T cell leukemia virus type I) binding pr             | NM_025816.3     |
| 36 | Gene Tril    | mKIAA0644,     | A TLR4 interactor with leucine-rich repeats                      | NM_025817.4     |
| 18 | Gene Chn2    | 1700026N20Ri   | chimerin (chimaerin) 2                                           | NM_023543.2, NM |
| 27 | Gene 9130019 | OTTMUSG000i    | RIKEN cDNA 9130019P16 gene                                       | NR_033635.1     |
| 17 | Gene Scrn1   | mKIAA0193,     | Klsecernin 1                                                     | NM_027268.2     |
| 27 | Gene Fkbp14  | BC029109,      | Fkl FK506 binding protein 14                                     | NM_153573.1     |
| 27 | Gene Plekha8 | Fapp-2,        | Plekha pleckstrin homology domain containing, family A (pl       | NM_001001335.2  |
| 20 | Gene Nod1    | Card4,         | Nlrc1, C nucleotide-binding oligomerization domain containi      | NM_172729.3, NM |
| 34 | Gene Gars    | Sgrp23,        | Nmf24glycyl-tRNA synthetase                                      | NM_180678.3     |
| 26 | Gene Adcyap1 | PAC1,          | AI84659adenylate cyclase activating polypeptide 1 receptor       | NM_007407.3, NM |
| 27 | Gene Avl9    | D730049P16Ri   | AVL9 homolog (S. cerevisiae)                                     | NM_030235.1     |
| 27 | Gene Nt5c3   | 3110004A18Ri   | 5'-nucleotidase, cytosolic III                                   | NM_026004.3, NM |
| 17 | Gene Herc3   | MGC30404,      | m hect domain and RLD 3                                          | NM_028705.3     |
| 20 | Gene Smarcd  | D6Pas1,        | mKIA/SWI/SNF-related, matrix-associated actin-dependen           | NM_007958.1, NM |
| 25 | Gene Ndnf    | epidermacan,   | A930038C07Rik, Ndnf                                              | NM_172399.3     |
| 33 | Gene 4930597 | 4930597O21Ri   | RIKEN cDNA 4930597O21 gene                                       | XM_989547.2     |
| 33 | Gene Gng12   | Gng12,         | AI8427guanine nucleotide binding protein (G protein), gam        | NM_001177556.1  |
| 31 | Gene Gadd45  | AA545191,      | Dd growth arrest and DNA-damage-inducible 45 alpha               | NM_007836.1     |
| 31 | Gene E230016 | E230016M11R    | RIKEN cDNA E230016M11 gene                                       | NR_040278.1     |
| 37 | Gene Serbp1  | 9330147J08Ri   | serpine1 mRNA binding protein 1                                  | NM_025814.2, NM |
| 25 | Gene Rmnd5a  | 1110007A06Ri   | required for meiotic nuclear division 5 homolog A (S             | NM_024288.2     |
| 27 | Gene Rnf103  | AW146237,      | kf: ring finger protein 103                                      | NM_009543.2     |
| 21 | Gene Chmp3   | 9130011K15Rik, | 4921505F14Rik, CGI-49, 25.1, D6Ertd286e, Vps24,                  | NM_025783.3     |
| 27 | Gene Kdm3a   | Jmjd1a,        | Tsga, r lysine (K)-specific demethylase 3A                       | NM_001038695.2  |
| 21 | Gene Reep1   | C87808,        | D6Ert receptor accessory protein 1                               | NM_178608.4     |
| 29 | Gene St3gal5 | 3S-T,          | Siat9, [a] ST3 beta-galactoside alpha-2,3-sialyltransferase 5    | NM_001035228.1, |
| 31 | Gene Atoh8   | Atoh8,         | 493342atonal homolog 8 (Drosophila)                              | NM_153778.3     |
| 28 | Gene Usp39   | Usp39,         | CGI-21, ubiquitin specific peptidase 39                          | NM_138592.4     |
| 28 | Gene 0610030 | 1500031N04Ri   | RIKEN cDNA 0610030E20 gene                                       | NM_026696.1     |
| 28 | Gene Tmem15  | MGC25977,      | Tr transmembrane protein 150A                                    | NM_144916.3     |
| 19 | Gene Rnf181  | C77350,        | 2500C ring finger protein 181                                    | NM_025607.3     |
| 19 | Gene Vamp5   | Camp,          | AF1193 vesicle-associated membrane protein 5                     | NM_016872.4, NM |
| 17 | Gene Vamp8   | AU041171,      | en vesicle-associated membrane protein 8                         | NM_016794.3     |
| 42 | Gene Ggcx    | Ggcx           |                                                                  | NM_019802.4     |
| 42 | Gene Mat2a   | Mat2a,         | MGC6: methionine adenosyltransferase II, alpha                   | NM_145569.4     |
| 42 | Gene 4930414 | 4930414L22Ri   | RIKEN cDNA 4930414L22 gene                                       | NR_046011.1     |
| 30 | Gene Tcf7l1  | Tcf7l1,        | Tcf-3, b transcription factor 7 like 1 (T cell specific, HMG box | NM_009332.2, NM |
| 30 | Gene Kcmf1   | Kcmf1,         | 170009 potassium channel modulatory factor 1                     | NM_019715.2     |
| 29 | Gene Tmsb10  | TB10,          | Ptmb10, thymosin, beta 10                                        | NM_001039392.2  |
| 28 | Gene Hk2     | AI642394,      | Hk2 hexokinase 2                                                 | NM_013820.3     |
| 32 | Gene Loxl3   | Lor2,          | Loxl3, Lo lysyl oxidase-like 3                                   | NM_013586.4     |
| 32 | Gene Htra2   | Htra2,         | AI48171HtrA serine peptidase 2                                   | NM_019752.3     |
| 32 | Gene Aup1    | AA589454,      | Au ancient ubiquitous protein 1                                  | NM_007517.3     |
| 32 | Gene Dqx1    | Dqx1,          | 2310066 DEAQ RNA-dependent ATPase                                | NM_033606.3     |
| 16 | Gene Tlx2    | Ncx1,          | Tlx1l1, HT cell leukemia, homeobox 2                             | NM_009392.2     |
| 16 | Gene Pcgf1   | 2010002K04Ri   | polycomb group ring finger 1                                     | NM_197992.1     |
| 32 | Gene Ccdc142 | A230058J24Ri   | coiled-coil domain containing 142                                | NM_001081266.1  |

|    |               |                                                                    |                  |
|----|---------------|--------------------------------------------------------------------|------------------|
| 32 | Gene Mrpl53   | Mrpl53, 11100 mitochondrial ribosomal protein L53                  | NM_026744.3      |
| 30 | Gene Mogs     | Mogs, Gcs1, 1 $\beta$ mannosyl-oligosaccharide glucosidase         | NM_020619.2      |
| 30 | Gene Wbp1     | Wbp1, AI2551: WW domain binding protein 1                          | NM_001083923.1,  |
| 30 | Gene Ino80b   | Papa1, Ino80b INO80 complex subunit B                              | NM_023547.1      |
| 22 | Gene Rtkn     | Rtkn rhotekin                                                      | NM_133641.2, NM  |
| 19 | Gene Wdr54    | 1700030E05Ri WD repeat domain 54                                   | NM_023790.2      |
| 19 | Gene 1700003  | AU041756, MCRIKEN cDNA 1700003E16 gene                             | NM_027948.1      |
| 19 | Gene Dctn1    | AL022633, Dct dynactin 1                                           | NM_007835.2, NM  |
| 34 | Gene Mthfd2   | Mthfd2, AW55 methylenetetrahydrofolate dehydrogenase (NAD+ d       | NM_008638.2      |
| 34 | Gene Mob1a    | Mobkl1b, Mob MOB kinase activator 1A                               | NM_145571.2      |
| 21 | Gene Bola3    | Bola3, 181005 bolA-like 3 (E. coli)                                | NM_175277.4      |
| 30 | Gene Tet3     | BC037432, D2: tet methylcytosine dioxygenase 3                     | NM_183138.2      |
| 30 | Gene B230319  | B230319C09Ri RIKEN cDNA B230319C09 gene                            | NR_028382.1      |
| 20 | Gene Cyp26b1  | P450RAI-2, Cyp cytochrome P450, family 26, subfamily b, polypeptic | NM_001177713.1,  |
| 34 | Gene Exoc6b   | 4930569O18Ri exocyst complex component 6B                          | NM_177077.2      |
| 24 | Gene Sfxn5    | C230001H08Ri sideroflexin 5                                        | NM_178639.4      |
| 34 | Gene Rab11fip | 9130206P09Ri RAB11 family interacting protein 5 (class I)          | NM_001003955.2   |
| 24 | Gene Mir705   | Mirn705, Mir7 microRNA 705                                         | NR_030486.1      |
| 31 | Gene Noto     | MmNot, Flh, N notochord homolog (Xenopus laevis)                   | NM_001007472.2   |
| 31 | Gene Smyd5    | NN8-4AG, Rrg: SET and MYND domain containing 5                     | NM_144918.2      |
| 21 | Gene Fbxo41   | Fbxo41, 96300 F-box protein 41                                     | NM_001001160.2   |
| 21 | Gene Egr4     | pAT133, Egr4, early growth response 4                              | NM_020596.2      |
| 18 | Gene Alms1    | bbb, Alms1                                                         | NM_145223.2      |
| 20 | Gene Figla    | bHLHc8, Figla folliculogenesis specific basic helix-loop-helix     | NM_012013.1      |
| 22 | Gene Tgfa     | wa1, Tgfa, wa- transforming growth factor alpha                    | NM_031199.3      |
| 29 | Gene Fam136   | 2010309E21Ri family with sequence similarity 136, member A         | NM_025591.2      |
| 29 | Gene Snrpg    | AL022803, 281small nuclear ribonucleoprotein polypeptide G         | NM_026506.2      |
| 38 | Gene Pcyox1   | AI115532, AI4: prenylcysteine oxidase 1                            | NM_025823.4      |
| 38 | Gene Tia1     | AI256674, 231 cytotoxic granule-associated RNA binding protein 1   | NM_011585.4, NM  |
| 31 | Gene Pcbp1    | [a]CP-1, Pcbp1 poly(rC) binding protein 1                          | NM_011865.3      |
| 31 | Gene 1600020  | 1600020E01Ri RIKEN cDNA 1600020E01 gene                            | NR_037960.1, NR_ |
| 37 | Gene Gmcl1    | Gcl, mgcl-1, Gr germ cell-less homolog 1 (Drosophila)              | NM_011818.3      |
| 37 | Gene Anxa4    | Xanx-4, AI265: annexin A4                                          | NM_013471.2      |
| 24 | Gene Gfpt1    | AI324119, GFA glutamine fructose-6-phosphate transaminase 1        | NM_013528.3      |
| 28 | Gene Gm1961   | Gm19618 predicted gene, 19618                                      | XM_003086534.1,  |
| 28 | Gene Efcc1    | Ccdc48, Efcc1 EF hand and coiled-coil domain containing 1          | NM_001159697.1   |
| 33 | Gene Rab43    | 1810048P08Ri RAB43, member RAS oncogene family                     | NM_133717.2, NM  |
| 33 | Gene Isy1     | AI181014, AUC ISY1 splicing factor homolog (S. cerevisiae)         | NM_133934.4      |
| 26 | Gene Copg1    | Copg, MGC66965, Copg1, D6Wsu16e, BC056168, D6Ert71e, AU01          | NM_201244.1, NM  |
| 26 | Gene 8430410  | 8430410A17Ri RIKEN cDNA 8430410A17 gene                            | NM_173737.2      |
| 33 | Gene H1fx     | Gm461, H1X, FH1 histone family, member X                           | NM_198622.1      |
| 33 | Gene Gm5577   | EG434064, Gr predicted gene 5577                                   | NR_026990.1      |
| 36 | Gene Rpn1     | Rpn1, Rpn-1, A ribophorin I                                        | NM_133933.4      |
| 22 | Gene Kbtbd12  | 4933428M03R kelch repeat and BTB (POZ) domain containing 12        | NM_029013.2, NM  |
| 27 | Gene Mgl1     | AA589436, Ma monoglyceride lipase                                  | NM_001166249.1   |
| 38 | Gene Mcm2     | Mcmd2, mKIA: minichromosome maintenance deficient 2 mitotin (      | NM_008564.2      |
| 38 | Gene Tpra1    | Gpr175, 40kDa: transmembrane protein, adipocyte associated 1       | NM_011906.2      |

|    |               |                                                                     |                  |
|----|---------------|---------------------------------------------------------------------|------------------|
| 24 | Gene Plxna1   | PlexA1, Plxna1 plexin A1                                            | NM_008881.2      |
| 22 | Gene Txnrd3   | Tgr, A196535, thioredoxin reductase 3                               | NM_153162.3, NM  |
| 37 | Gene Uroc1    | A1265605, MG urocanase domain containing 1                          | NM_144940.2      |
| 37 | Gene Zxdc     | B930086F11Ri ZXD family zinc finger C                               | NM_030260.3, NM  |
| 29 | Gene Klf15    | KKLF, AV04813 Kruppel-like factor 15                                | NM_023184.3      |
| 28 | Gene Iqsec1   | BRAG2, D6Ertc IQ motif and Sec7 domain 1                            | NM_001134383.1   |
| 20 | Gene Nup210   | gp210, Pom21 nucleoporin 210                                        | NM_018815.2      |
| 32 | Gene Slc6a6   | AA589629, Tau solute carrier family 6 (neurotransmitter transporter | NM_009320.4      |
| 24 | Gene 9530026  | B430306B02, RIKEN cDNA 9530026P05 gene                              | NR_015530.2      |
| 22 | Gene Slc25a2  | Slc25a6, AW5E solute carrier family 25 (mitochondrial carrier, phos | NM_026255.5      |
| 36 | Gene Lrig1    | Img, Lrig1, D6E leucine-rich repeats and immunoglobulin-like domain | NM_008377.2      |
| 27 | Gene Kbtbd8   | SSEC-51, mKIAA kelch repeat and BTB (POZ) domain containing 8       | NM_001008785.4   |
| 27 | Gene Suclg2   | AW556404, Succinate-Coenzyme A ligase, GDP-forming, beta subunit    | NM_011507.2      |
| 21 | Gene Eogt     | Eogt, A144749 EGF domain-specific O-linked N-acetylglucosamine (    | NM_175313.4      |
| 28 | Gene Tmf1     | Gm153, Tmf1 TATA element modulatory factor 1                        | NM_001081111.2   |
| 28 | Gene Uba3     | Uba3, Ube1c, ubiquitin-like modifier activating enzyme 3            | NM_011666.2, NM  |
| 24 | Gene Frmd4b   | GRSP1, 60304 FERM domain containing 4B                              | NM_145148.2      |
| 25 | Gene Eif4e3   | A1451927, Eif4 eukaryotic translation initiation factor 4E member 3 | NM_025829.4      |
| 19 | Gene Gpr27    | Gpr27                                                               | NM_008158.1      |
| 22 | Gene Rybp     | YEA1, MGC62 RING1 and YY1 binding protein                           | NM_019743.3      |
| 36 | Gene Shq1     | Grim-1, Shq1, SHQ1 homolog (S. cerevisiae)                          | NM_181590.4      |
| 25 | Gene Pdzn3    | SEMAD3, Pc PDZ domain containing RING finger 3                      | NM_018884.2      |
| 32 | Gene Trnt1    | 2410043H24Ri tRNA nucleotidyl transferase, CCA-adding, 1            | NM_001242360.1   |
| 32 | Gene Crbn     | Crbn, AW1082 cereblon                                               | NM_175357.2, NM  |
| 31 | Gene Sumf1    | Sumf1, A18515 sulfatase modifying factor 1                          | NM_145937.3      |
| 35 | Gene Arl8b    | gie1, 2610313 ADP-ribosylation factor-like 8B                       | NM_026011.3      |
| 35 | Gene Edem1    | Edem1, mKIAA ER degradation enhancer, mannosidase alpha-like 1      | NM_138677.2      |
| 24 | Gene Oxtr     | Oxtr, OTR oxytocin receptor                                         | NM_001081147.1   |
| 35 | Gene Thumpd   | AW556087, Gt THUMP domain containing 3                              | NM_008188.2      |
| 35 | Gene Gt(ROSA) | Gtrgeo26, Gt(F gene trap ROSA 26, Philippe Soriano                  | NR_027008.1, NR_ |
| 35 | Gene Setd5    | MGC90828, Se SET domain containing 5                                | NM_028385.1      |
| 24 | Gene Cpne9    | mKIAA4217, A copine family member IX                                | NM_170673.3      |
| 24 | Gene Brpf1    | 4833438B11Ri bromodomain and PHD finger containing, 1               | NM_030178.1      |
| 27 | Gene Ogg1     | Mmh, Ogg1 8-oxoguanine DNA-glycosylase 1                            | NM_010957.4      |
| 27 | Gene Camk1    | CaMKIalpha, D calcium/calmodulin-dependent protein kinase I         | NM_133926.2      |
| 26 | Gene Cidec    | CIDE-3, Cidec, cell death-inducing DFFA-like effector c             | NM_178373.3      |
| 26 | Gene Jagn1    | AW146438, Jajagunal homolog 1 (Drosophila)                          | NM_001205025.1   |
| 27 | Gene Il17rc   | Gm19850, Il17 interleukin 17 receptor C                             | NM_134159.4, NM  |
| 27 | Gene Creld1   | A1843811, Crel cysteine-rich with EGF-like domains 1                | NM_133930.1      |
| 24 | Gene Prrt3    | 6330505P20, E proline-rich transmembrane protein 3                  | NM_172487.3      |
| 28 | Gene Emc3     | Emc3, Tmem111, 0610039A15Rik, AW260416, Pob, A1225901               | NM_175101.3      |
| 28 | Gene Fancd2   | FACD, Fancd2, Fanconi anemia, complementation group D2              | NM_001033244.3   |
| 23 | Gene Fancd2o  | 4931417G12Ri Fancd2 opposite strand                                 | NM_027633.3      |
| 34 | Gene Brk1     | AW011779, 67BRICK1, SCAR/WAVE actin-nucleating complex subu         | NM_133937.1      |
| 34 | Gene Vhl      | Vhl, Vhlh von Hippel-Lindau tumor suppressor                        | NM_009507.3      |
| 32 | Gene Irak2    | A1649099, MG interleukin-1 receptor-associated kinase 2             | NM_172161.4, NM  |
| 32 | Gene Tatdn2   | KIAA0218, Tat TatD DNase domain containing 2                        | NM_001033463.3   |



|    |               |                                                                    |                 |
|----|---------------|--------------------------------------------------------------------|-----------------|
| 32 | Gene Raf1     | AA990557, Raf v-raf-leukemia viral oncogene 1                      | NM_029780.3     |
| 61 | Gene Cand2    | 2210404G23Ri cullin-associated and neddylation-dissociated 2 (put  | NM_025958.2     |
| 61 | Gene Rpl32    | AU020185, Rp ribosomal protein L32                                 | NM_172086.2     |
| 61 | Gene Snora7a  | MBI-141, Snor. small nucleolar RNA, H/ACA box 7A                   | NR_028546.1     |
| 61 | Gene Efcab12  | Efcab12, MGC1 EF-hand calcium binding domain 12                    | NM_001110506.1  |
| 42 | Gene Plxnd1   | Plxnd1, 62304: plexin D1                                           | NM_026376.3     |
| 19 | Gene Tmcc1    | mKIAA0779, 3l transmembrane and coiled coil domains 1              | NM_177412.1     |
| 19 | Gene Gm8213   | EG666648, Grr predicted pseudogene 8213                            | XM_003086526.1, |
| 32 | Gene Zfand4   | AV260042, Zfa zinc finger, AN1-type domain 4                       | NM_001081317.1  |
| 32 | Gene March8   | 1300017E09Ri membrane-associated ring finger (C3HC4) 8             | NM_027920.4     |
| 27 | Gene Cxcl12   | Tlsfa, Sdf1a, Sc chemokine (C-X-C motif) ligand 12                 | NM_021704.3, NM |
| 41 | Gene Hnrnpf   | AA407306, MC heterogeneous nuclear ribonucleoprotein F             | NM_133834.2, NM |
| 22 | Gene Bms1     | Bms1, BC0309 BMS1 homolog, ribosome assembly protein (yeast)       | NM_194339.1     |
| 22 | Gene Zfp248   | 2810037F07Ri zinc finger protein 248                               | NM_028335.2     |
| 31 | Gene Cacna1c  | Cacna1c, Cchl1 calcium channel, voltage-dependent, L type, alpha 1 | NM_009781.3, NM |
| 31 | Gene Dcp1b    | B930050E02Ri DCP1 decapping enzyme homolog B (S. cerevisiae)       | NM_001033379.3  |
| 55 | Gene Wnt5b    | Wnt-5b, Wnt5 wingless-related MMTV integration site 5B             | NM_009525.3     |
| 55 | Gene Fbx14    | Fbx14l, AW32: F-box and leucine-rich repeat protein 14             | NM_133940.3     |
| 28 | Gene Erc1     | 9630025C19Ri ELKS/RAB6-interacting/CAST family member 1            | NM_178085.3, NM |
| 28 | Gene 3110021  | 3110021A11Ri RIKEN cDNA 3110021A11 gene                            | NR_030776.1     |
| 42 | Gene Wnk1     | mKIAA0344, W WNK lysine deficient protein kinase 1                 | NM_001185020.1  |
| 42 | Gene Mir706   | mir-706, mmu. microRNA 706                                         | NR_030487.1     |
| 18 | Gene B4galnt3 | B4galnt3, C33( beta-1,4-N-acetyl-galactosaminyl transferase 3      | NM_198884.1     |
| 23 | Gene Ccdc77   | 2400002C23Ri coiled-coil domain containing 77                      | NM_026028.5, NR |
| 23 | Gene Kdm5a    | RBP2, Jarid1a, lysine (K)-specific demethylase 5A                  | NM_145997.2     |
| 22 | Gene Il17ra   | Il17ra, Il17r, VI interleukin 17 receptor A                        | NM_008359.2     |
| 29 | Gene Cecr5    | Cecr5, A93000 cat eye syndrome chromosome region, candidate 5      | NM_144815.2     |
| 19 | Gene Cecr2    | KIAA1740, Cec cat eye syndrome chromosome region, candidate 2      | NM_001128151.1  |
| 33 | Gene Atp6v1e  | E2, D6Ert d385: ATPase, H+ transporting, lysosomal V1 subunit E1   | NM_007510.2     |
| 21 | Gene Bid      | AU022477, Bic BH3 interacting domain death agonist                 | NM_007544.3     |
| 33 | Gene Mical3   | Mical3, KIAA08 microtubule associated monooxygenase, calponin a    | NM_001270475.1  |
| 22 | Gene Necap1   | AI747569, FLJ1 NECAP endocytosis associated 1                      | NM_026267.2     |
| 21 | Gene Pex5     | Pex5, ESTM1, p peroxisomal biogenesis factor 5                     | NM_175933.2, NM |
| 33 | Gene Lpcat3   | Oact5, Lpcat3, lysophosphatidylcholine acyltransferase 3           | NM_145130.2     |
| 33 | Gene Emg1     | Emg1, Grcc2f, EMG1 nucleolar protein homolog (S. cerevisiae)       | NM_013536.2     |
| 33 | Gene Phb2     | AU044498, RE. prohibitin 2                                         | NM_007531.2     |
| 33 | Gene Mir141   | Mirn141, Mir1 microRNA 141                                         | NR_029554.1     |
| 33 | Gene Mir200c  | Mir200c, Mirn. microRNA 200c                                       | NR_029792.1     |
| 33 | Gene Ptpn6    | Ptp1C, Hcph, P protein tyrosine phosphatase, non-receptor type 6   | NM_013545.2, NM |
| 21 | Gene Grcc10   | 2310033H05Ri gene rich cluster, C10 gene                           | NM_013535.1     |
| 21 | Gene Rnu7     | Rnu7 U7 small nuclear RNA                                          | NR_024201.3     |
| 21 | Gene Atn1     | Atr1, Drpla, atratrophin 1                                         | NM_007881.4     |
| 23 | Gene Spsb2    | Grcc9, Spsb2, s splA/ryanodine receptor domain and SOCS box cont   | NM_013539.1     |
| 23 | Gene Tpi1     | Tpi1, Tpi, AI25: triosephosphate isomerase 1                       | NM_009415.2     |
| 23 | Gene Usp5     | ISOT, ISOT-1, U ubiquitin specific peptidase 5 (isopeptidase T)    | NM_013700.1     |
| 27 | Gene Lag3     | LAG-3, CD223, lymphocyte-activation gene 3                         | NM_008479.2     |
| 27 | Gene Ptms     | Ptms, 2610009 parathyrosin                                         | NM_026988.2     |

|    |                   |                                                                  |                  |
|----|-------------------|------------------------------------------------------------------|------------------|
| 34 | Gene A230083      | A230083G16R RIKEN cDNA A230083G16 gene                           | XR_107824.1, XR_ |
| 34 | Gene Mlf2         | C77284, A1256 myeloid leukemia factor 2                          | NM_145385.2, NM  |
| 25 | Gene Cops7a       | Cops7a, D6Ert COP9 (constitutive photomorphogenic) homolog, su   | NM_012003.2, NM  |
| 17 | Gene Pianp        | A1255183, AUC PILR alpha associated neural protein               | NM_175696.4, NM  |
| 36 | Gene Chd4         | AA617397, KIA chromodomain helicase DNA binding protein 4        | NM_145979.2      |
| 30 | Gene Nop2         | Nop2, 120kDa, NOP2 nucleolar protein                             | NM_138747.2      |
| 26 | Gene Iffo1        | HOM-TES-103, intermediate filament family orphan 1               | NM_178787.5, NM  |
| 26 | Gene Gapdh        | MGC105239, glyceraldehyde-3-phosphate dehydrogenase              | NM_008084.2      |
| 26 | Gene Ncapd2       | CAP-D2, KIAA0 non-SMC condensin I complex, subunit D2            | NM_146171.1      |
| 18 | Gene Vamp1        | Syb1, Syb-1, le vesicle-associated membrane protein 1            | NM_009496.3, NM  |
| 18 | Gene Tapbpl       | MGC27679, TaTAP binding protein-like                             | NM_145391.2      |
| 26 | Gene Ltbr         | LTbetaR, A1256 lymphotoxin B receptor                            | NM_010736.3      |
| 26 | Gene Scnn1a       | mENaC, SCNEA sodium channel, nonvoltage-gated 1 alpha            | NM_011324.2      |
| 17 | Gene Cd9          | Tspan29, Cd9 CD9 antigen                                         | NM_007657.3      |
| 34 | Gene Rad51ap      | 2510006L10Ril RAD51 associated protein 1                         | NM_009013.3      |
| 34 | Gene D6Wsu1       | C12orf4, D6W: DNA segment, Chr 6, Wayne State University 163, e  | NM_138594.3      |
| 21 | Gene Fgf23        | Fgf23 fibroblast growth factor 23                                | NM_022657.3      |
| 21 | Gene 9630033      | AI595337, C79 RIKEN cDNA 9630033F20 gene                         | NM_177003.5      |
| 29 | Gene Ccnd2        | 2600016F06Ril cyclin D2                                          | NM_009829.3      |
| 29 | Gene 9330179      | 9330179D12Ril RIKEN cDNA 9330179D12 gene                         | NR_040273.1, NR_ |
| 24 | Gene Tspan9       | Tspan9, AU018 tetraspanin 9                                      | NM_175414.4      |
| 33 | Gene Tulp3        | Tulp3, 231002 tubby-like protein 3                               | NM_011657.2      |
| 33 | Gene LOC101055755 | uncharacterized LOC101055755                                     | XM_003945402.1   |
| 33 | Gene Rhno1        | 5930416I19Ril RAD9-HUS1-RAD1 interacting nuclear orphan 1        | NR_027359.1, NR_ |
| 33 | Gene Foxm1        | Foxm1b, AW5: forkhead box M1                                     | NM_008021.4      |
| 31 | Gene Fkbp4        | Fkbp4, p59, 59 FK506 binding protein 4                           | NM_010219.3      |
| 31 | Gene Gm1006       | Gm10069, ENS predicted gene 10069                                | NR_028592.1, NR_ |
| 28 | Gene Etv6         | Etv6, Tel, AW1 ets variant gene 6 (TEL oncogene)                 | NM_007961.3      |
| 19 | Gene Lrp6         | Cd, C030016K1 low density lipoprotein receptor-related protein 6 | NM_008514.4      |
| 21 | Gene Crebl2       | Crebl2, MGC1: cAMP responsive element binding protein-like 2     | NM_177687.3      |
| 29 | Gene Cdkn1b       | p27Kip1, Kip1, cyclin-dependent kinase inhibitor 1B              | NM_009875.4      |
| 29 | Gene 1190002      | 1190002F15Ril RIKEN cDNA 1190002F15 gene                         | NR_037955.1, NR_ |
| 24 | Gene Apold1       | Gm1075, Apol: apolipoprotein L domain containing 1               | NM_001109914.1   |
| 25 | Gene Gm1943       | Gm19434 predicted gene, 19434                                    | NR_040296.1      |
| 25 | Gene 8430419      | Kiaa1467, 843 RIKEN cDNA 8430419L09 gene                         | NM_028982.4      |
| 34 | Gene Hist4h4      | Hist1h4j, Hist4 histone cluster 4, H4                            | NM_175652.2      |
| 34 | Gene H2afj        | MGC118637, H2A histone family, member J                          | NM_177688.4      |
| 34 | Gene Wbp11        | Wbp11, Npwb WW domain binding protein 11                         | NM_021714.4      |
| 19 | Gene Rerg         | Rerg RAS-like, estrogen-regulated, growth-inhibitor              | NM_181988.2, NM  |
| 16 | Gene Eps8         | Eps8, AW2617 epidermal growth factor receptor pathway substrate  | NM_007945.2      |
| 20 | Gene Plekha5      | MGC38455, Gt pleckstrin homology domain containing, family A me  | NM_144920.3      |
| 38 | Gene Aebp2        | B230313N05Ril AE binding protein 2                               | NM_001005605.1   |
| 28 | Gene Pde3a        | A930022O17R phosphodiesterase 3A, cGMP inhibited                 | NM_018779.1      |
| 30 | Gene Pyroxd1      | Pyroxd1 pyridine nucleotide-disulphide oxidoreductase dom:       | NM_183165.3      |
| 30 | Gene Recq1        | RecQ1, A19572 RecQ protein-like                                  | NM_023042.3, NM  |
| 30 | Gene Golt1b       | AA407874, Go golgi transport 1 homolog B (S. cerevisiae)         | NM_025872.4      |
| 23 | Gene Ldhb         | A1790582, Ldh lactate dehydrogenase B                            | NM_008492.2      |

|    |              |                                                                       |                  |
|----|--------------|-----------------------------------------------------------------------|------------------|
| 18 | Gene Cmas    | D6Bwg0250e, cytidine monophospho-N-acetylneuraminic acid syn          | NM_009908.2      |
| 15 | Gene St8sia1 | Sia-T, Siat8a, S ST8 alpha-N-acetyl-neuraminide alpha-2,8-sialyltran  | NM_011374.2      |
| 28 | Gene C2cd5   | C030008B15Ri C2 calcium-dependent domain containing 5                 | NM_029081.2, NM  |
| 28 | Gene Etnk1   | D6Ert3e, 493 ethanolamine kinase 1                                    | NM_029250.2      |
| 19 | Gene Bcat1   | BCATc, Bcat1, branched chain aminotransferase 1, cytosolic            | NM_001024468.3   |
| 19 | Gene Kras    | Ki-ras, K-ras, rαv-Ki-ras2 Kirsten rat sarcoma viral oncogene homolog | NM_021284.6      |
| 19 | Gene Gm1570  | Gm15706, OT1 predicted gene 15706                                     | NR_045598.1      |
| 26 | Gene Bhlhe41 | 6430520M22R basic helix-loop-helix family, member e41                 | NM_024469.1      |
| 24 | Gene Itpr2   | Itpr2, Ip3r2, In inositol 1,4,5-triphosphate receptor 2               | NM_010586.1, NM  |
| 27 | Gene Tm7sf3  | Tm7sf3, 2010C transmembrane 7 superfamily member 3                    | NM_026281.2      |
| 27 | Gene Med21   | Surb7, D19234 mediator complex subunit 21                             | NM_025315.3      |
| 31 | Gene Stk38l  | Ndr54, 493047 serine/threonine kinase 38 like                         | NM_172734.3      |
| 24 | Gene Ppfibp1 | 4632409B19Ri PTPRF interacting protein, binding protein 1 (liprin b   | NM_026221.2, NM  |
| 41 | Gene Rep15   | Rep15, 221041 RAB15 effector protein                                  | NM_025620.2      |
| 41 | Gene Mrps35  | Mrps35, MRPS mitochondrial ribosomal protein S35                      | NM_145573.2      |
| 34 | Gene Mansc4  | EG545893, Ma MANSC domain containing 4                                | NM_001034903.3   |
| 34 | Gene Klhl42  | AI450355, A33 kelch-like 42                                           | NM_001081237.1   |
| 25 | Gene Gm6288  | Gm6288, EG62 predicted gene 6288                                      | XR_168432.1      |
| 25 | Gene Ccdc91  | 1810060J02Ril coiled-coil domain containing 91                        | NM_025911.2      |
| 22 | Gene Ergic2  | 1200009B18Ri ERGIC and golgi 2                                        | NM_026355.3, NM  |
| 22 | Gene 4732416 | 4732416N19Ri RIKEN cDNA 4732416N19 gene                               | NR_015615.1      |
| 23 | Gene Tmtc1   | Tmtc1, BC0238 transmembrane and tetratricopeptide repeat contain      | NM_198967.5      |
| 36 | Gene Fam60a  | Tera, Pptcs1, F family with sequence similarity 60, member A          | NM_019643.3      |
| 36 | Gene 3010003 | 3010003L21Ril RIKEN cDNA 3010003L21 gene                              | XR_107859.3, XR_ |
| 25 | Gene Dennd5l | Dennd5b, AI85 DENN/MADD domain containing 5B                          | NM_177192.3      |
| 28 | Gene 2810474 | 2810474O19Ril RIKEN cDNA 2810474O19 gene                              | NM_026054.3      |
| 34 | Gene Prpf31  | AW554706, PFPRP31 pre-mRNA processing factor 31 homolog (yea          | NM_027328.4, NM  |
| 34 | Gene Cnot3   | A930039N10R CCR4-NOT transcription complex, subunit 3                 | NM_146176.3      |
| 34 | Gene Mir3572 | mmu-mir-3572; microRNA 3572                                           | NR_039587.1      |
| 14 | Gene 9430041 | 9430041J12Ril RIKEN cDNA 9430041J12 gene                              | NR_033568.1      |
| 14 | Gene Ttyh1   | tty, Ttyh1, 493 tweety homolog 1 (Drosophila)                         | NM_021324.5, NM  |
| 14 | Gene D030047 | D030047H15R RIKEN cDNA D030047H15 gene                                | NR_033548.1      |
| 25 | Gene Leng8   | AW049671, Le leukocyte receptor cluster (LRC) member 8                | NM_172736.3      |
| 25 | Gene Leng9   | F630035L11Ril leukocyte receptor cluster (LRC) member 9               | NM_175529.3      |
| 25 | Gene Cdc42ep | Borg3, Cdc42e CDC42 effector protein (Rho GTPase binding) 5           | NM_021454.3      |
| 30 | Gene Tmem19  | 4930572D21Ril transmembrane protein 190                               | NM_030028.1      |
| 30 | Gene Tmem23  | 2210411K11Ril transmembrane protein 238                               | NM_029384.1      |
| 30 | Gene Rpl28   | MGC107666, Ribosomal protein L28                                      | NM_009081.2      |
| 20 | Gene Ube2s   | E2-EPF, 091000 ubiquitin-conjugating enzyme E2S                       | NM_133777.2      |
| 23 | Gene Zfp628  | Zec, Zfp628, Zr zinc finger protein 628                               | NM_170759.2      |
| 23 | Gene Nat14   | BC047219, MC N-acetyltransferase 14                                   | NM_201355.3      |
| 23 | Gene Ssc5d   | A430110N23R scavenger receptor cysteine rich domain containing        | NM_173008.2      |
| 20 | Gene Zfp579  | Zfp579, 11100 zinc finger protein 579                                 | NM_026741.2      |
| 19 | Gene Fiz1    | Fiz1, MGC1179 Flt3 interacting zinc finger protein 1                  | NM_001110328.1   |
| 19 | Gene Zfp524  | Zfp524, Znf524 zinc finger protein 524                                | NM_025324.2      |
| 20 | Gene Zfp865  | Zfp865, Znf865 zinc finger protein 865                                | NM_001033383.2   |
| 20 | Gene Zfp784  | Znf784, Zfp784 zinc finger protein 784                                | NM_001039532.2   |

|    |              |                                                                     |                 |
|----|--------------|---------------------------------------------------------------------|-----------------|
| 28 | Gene Zfp580  | AI838225, Znf zinc finger protein 580                               | NM_026900.1     |
| 28 | Gene Ccdc106 | BC018462, MC coiled-coil domain containing 106                      | NM_146178.2     |
| 31 | Gene U2af2   | MGC118033, U2 small nuclear ribonucleoprotein auxiliary factor (    | NM_001205231.1  |
| 31 | Gene Epn1    | lbp1, MGC106 epsin 1                                                | NM_001252454.1  |
| 30 | Gene Zfp787  | Zfp787, Znf787 zinc finger protein 787                              | NM_001013012.1  |
| 32 | Gene Gm1653  | Gm16532 predicted gene, 16532                                       | NM_001134752.1  |
| 22 | Gene Peg3    | End4, mKIAA0: paternally expressed 3                                | NM_008817.2     |
| 22 | Gene Usp29   | Ocat, Usp29 ubiquitin specific peptidase 29                         | NM_021323.2     |
| 28 | Gene Zfp606  | Zfp606, AW49 zinc finger protein 606                                | NM_026112.4, NM |
| 23 | Gene Zfp324  | Zfp324, D4300 zinc finger protein 324                               | NM_178732.3     |
| 22 | Gene Slc27a5 | FATP5, MGC14 solute carrier family 27 (fatty acid transporter), men | NM_009512.2     |
| 22 | Gene Zbtb45  | Zbtb45, BB161 zinc finger and BTB domain containing 45              | NM_001024699.1  |
| 43 | Gene Trim28  | Trim28, KAP-1, tripartite motif-containing 28                       | NM_011588.3     |
| 43 | Gene Chmp2a  | 1500016L11Ril charged multivesicular body protein 2A                | NM_026885.3     |
| 43 | Gene Ube2m   | Ubc-rs2, MGC37197, Ube2m, MGC25453, UBC12, 2510040H03Rik            | NM_001168469.2  |
| 29 | Gene Mzf1    | Mzf-2, Mzf1, Z myeloid zinc finger 1                                | NM_145819.2     |
| 25 | Gene Zfp541  | Znf541, Zfp541 zinc finger protein 541                              | NM_001099277.1  |
| 25 | Gene Napa    | Napa, 150003: N-ethylmaleimide sensitive fusion protein attachme    | NM_025898.3     |
| 20 | Gene Slc8a2  | Slc8a2, Ncx2 solute carrier family 8 (sodium/calcium exchanger),    | NM_148946.2     |
| 29 | Gene Prr24   | Prr24, 261001: proline rich 24                                      | NM_001136270.1  |
| 29 | Gene Ccdc9   | Ccdc9, 260001 coiled-coil domain containing 9                       | NM_172297.1, NM |
| 31 | Gene Bbc3    | Bbc3, PUMA/JI BCL2 binding component 3                              | NM_133234.2     |
| 28 | Gene Sae1    | Sae1, Uble1a, SUMO1 activating enzyme subunit 1                     | NM_019748.2     |
| 24 | Gene Zc3h4   | Zc3h4, Bwq1, zinc finger CCCH-type containing 4                     | NM_198631.2     |
| 23 | Gene Tmem16  | Tmem160, 181 transmembrane protein 160                              | NM_026938.1     |
| 23 | Gene Npas1   | Npas1, bHLHe: neuronal PAS domain protein 1                         | NM_008718.2     |
| 25 | Gene Slc1a5  | ASCT2, M7VS1 solute carrier family 1 (neutral amino acid transport  | NM_009201.2     |
| 30 | Gene Fkrp    | MDC1C, LGMD fukutin related protein                                 | NM_173430.2     |
| 30 | Gene Strn4   | ZIN, Strn4, C8C striatin, calmodulin binding protein 4              | NM_001039878.2  |
| 21 | Gene Calm3   | Calm3, CaMA, calmodulin 3                                           | NM_007590.3     |
| 20 | Gene Pnmal2  | Pnmal2, EG43: PNMA-like 2                                           | NM_001099636.2  |
| 23 | Gene Ccdc8   | ENSMUSG000: coiled-coil domain containing 8                         | NM_001101535.1  |
| 32 | Gene Ppp5c   | AU020526, Pp: protein phosphatase 5, catalytic subunit              | NM_011155.2     |
| 32 | Gene Hif3a   | bHLHe17, NEP: hypoxia inducible factor 3, alpha subunit             | NM_016868.3, NM |
| 20 | Gene Nanos2  | Nanos2, nos2 nanos homolog 2 (Drosophila)                           | NM_194064.2     |
| 37 | Gene Mypop   | Mypop, P42po Myb-related transcription factor, partner of profilin  | NM_145579.3     |
| 37 | Gene Irf2bp1 | 6330414O09Ri: interferon regulatory factor 2 binding protein 1      | NM_178757.3     |
| 37 | Gene Foxa3   | Foxa3, Tcf-3g, forkhead box A3                                      | NM_008260.2     |
| 19 | Gene Sympk   | 1500016F02Ri: symplekin                                             | NM_026605.2     |
| 18 | Gene Rsph6a  | Rsph6a, RSP4, radial spoke head 6 homolog A (Chlamydomonas)         | NM_031255.2, NM |
| 18 | Gene Dmwd    | DMR-N9, MGC dystrophia myotonica-containing WD repeat motif         | NM_010058.2     |
| 40 | Gene Dmpk    | DM, Dmpk, Dn dystrophia myotonica-protein kinase                    | NM_001190490.1  |
| 40 | Gene Mir3100 | mmu-mir-310: microRNA 3100                                          | NR_037282.1     |
| 40 | Gene Six5    | Dmahp, TrexBl sine oculis-related homeobox 5                        | NM_011383.1     |
| 17 | Gene Qpctl   | gQC, BB10181: glutaminyl-peptide cyclotransferase-like              | NM_026111.3     |
| 17 | Gene Snrpd2  | 1810009A06Ri: small nuclear ribonucleoprotein D2                    | NM_026943.1     |
| 17 | Gene Gipr    | Gm1081, Gipr, gastric inhibitory polypeptide receptor               | NM_001080815.1  |

|    |              |                                                                                        |                 |
|----|--------------|----------------------------------------------------------------------------------------|-----------------|
| 22 | Gene Vasp    | Vasp, AA10725 vasodilator-stimulated phosphoprotein                                    | NM_009499.2     |
| 22 | Gene Ppm1n   | Ppm1n, A9300 protein phosphatase, Mg <sup>2+</sup> /Mn <sup>2+</sup> dependent, 1N (r  | NM_177691.3     |
| 20 | Gene Rtn2    | Rtn2, MGC359 reticulon 2 (Z-band associated protein)                                   | NM_013648.5, NM |
| 25 | Gene n-Ts2   |                                                                                        |                 |
| 29 | Gene Fosb    | Fosb FBJ osteosarcoma oncogene B                                                       | NM_008036.2     |
| 29 | Gene D830036 | D830036C21Ri RIKEN cDNA D830036C21 gene                                                | XM_003945770.1  |
| 27 | Gene Ercc1   | Ercc1, Ercc-1 excision repair cross-complementing rodent repair c                      | NM_007948.2, NM |
| 27 | Gene Cd3eap  | 2610103M17R CD3E antigen, epsilon polypeptide associated protei                        | NM_145822.2     |
| 27 | Gene Ppp1r13 | AV260376, Pp1 protein phosphatase 1, regulatory (inhibitor) subuni                     | NM_001010836.3  |
| 18 | Gene Mark4   | Markl1, 24100 MAP/microtubule affinity-regulating kinase 4                             | NM_172279.1     |
| 19 | Gene Exoc3l2 | Exoc3l2, AU04 exocyst complex component 3-like 2                                       | XM_001471750.3, |
| 29 | Gene Bloc1s3 | E230011O18, r biogenesis of lysosome-related organelles complex-                       | NM_177692.3     |
| 30 | Gene Trappc6 | 4930519D19Ri trafficking protein particle complex 6A                                   | NM_025960.3     |
| 30 | Gene Nkpd1   | Nkpd1, 23100: NTPase, KAP family P-loop domain containing 1                            | NM_027116.1     |
| 31 | Gene Ppp1r37 | Lrrc68, Gm158 protein phosphatase 1, regulatory subunit 37                             | NM_199149.3     |
| 31 | Gene Gemin7  | AI120175, AI4t gem (nuclear organelle) associated protein 7                            | NM_027189.2     |
| 24 | Gene Relb    | MGC143684, Favian reticuloendotheliosis viral (v-rel) oncogene rel                     | NM_009046.2     |
| 34 | Gene Clptm1  | N14, Clptm1, F cleft lip and palate associated transmembrane prote                     | NM_019649.2     |
| 34 | Gene Apoc2   | MGC117889, F apolipoprotein C-II                                                       | NM_009695.3     |
| 25 | Gene Pvr12   | Pvr, AI325026, poliovirus receptor-related 2                                           | NM_008990.3, NM |
| 25 | Gene Bcam    | Gplu, Bcam, 12 basal cell adhesion molecule                                            | NM_020486.2     |
| 30 | Gene Plaur   | Plaur, uPAR, C plasminogen activator, urokinase receptor                               | NM_011113.3     |
| 41 | Gene Cadm4   | Igsf4c, Tsl12, C cell adhesion molecule 4                                              | NM_153112.3     |
| 41 | Gene Zfp428  | AV271806, Znf zinc finger protein 428                                                  | NM_146183.2     |
| 18 | Gene Irgq    | FKSG27, Irgq, F immunity-related GTPase family, Q                                      | NM_153134.3     |
| 18 | Gene Pinlyp  | 2310033E01Ri phospholipase A2 inhibitor and LY6/PLAUR domain (                         | NM_001037143.2  |
| 21 | Gene Zfp575  | Zfp575, AI3268 zinc finger protein 575                                                 | NM_001033205.3  |
| 21 | Gene Ethe1   | Hsco, Ethe1, O ethylmalonic encephalopathy 1                                           | NM_023154.3     |
| 37 | Gene Dmrtc2  | Dmrtc2, 49334 doublesex and mab-3 related transcription factor lik                     | NM_027732.2     |
| 37 | Gene Rps19   | MGC107694, F ribosomal protein S19                                                     | NM_023133.1     |
| 17 | Gene Rabac1  | PRA1, Gbpap1, Rab acceptor 1 (prenylated)                                              | NM_010261.2     |
| 19 | Gene Atp1a3  | Atpa-2, MGC3 ATPase, Na <sup>+</sup> /K <sup>+</sup> transporting, alpha 3 polypeptide | NM_144921.1     |
| 22 | Gene Grik5   | MGC118086, K glutamate receptor, ionotropic, kainate 5 (gamma 2                        | NM_008168.2     |
| 22 | Gene Zfp574  | A630056B21Ri zinc finger protein 574                                                   | NM_175477.4, NM |
| 22 | Gene Pou2f2  | Oct2a, Oct2b, POU domain, class 2, transcription factor 2                              | NM_001163554.1  |
| 22 | Gene Dedd2   | 2410050E11Ri death effector domain-containing DNA binding prot                         | NM_207677.3     |
| 22 | Gene Zfp526  | D030024H03R zinc finger protein 526                                                    | NM_175436.4     |
| 22 | Gene Gsk3a   | Gsk3a, 270008 glycogen synthase kinase 3 alpha                                         | NM_001031667.1  |
| 22 | Gene 9130221 | AU016887, 91: RIKEN cDNA 9130221H12 gene                                               | NR_046001.1     |
| 37 | Gene Erf     | Erf                                                                                    | NM_010155.3     |
| 26 | Gene Cic     | 1200010B10Ri capicua homolog (Drosophila)                                              | NM_027882.3, NM |
| 26 | Gene Pafah1b | Pafahg, Pafah1 platelet-activating factor acetylhydrolase, isoform 1                   | NM_008776.2     |
| 26 | Gene Prr19   | Prr19, EG6231 proline rich 19                                                          | NM_001081294.1  |
| 26 | Gene Tmem14  | Tmem145, B9: transmembrane protein 145                                                 | NM_183311.2     |
| 22 | Gene Megf8   | Megf8, b2b28 multiple EGF-like-domains 8                                               | NM_001160400.1  |
| 23 | Gene Atp5sl  | 2310004L02Ril ATP5S-like                                                               | NM_025504.4     |
| 23 | Gene B3gnt8  | MGC32391, B: UDP-GlcNAc:betaGal beta-1,3-N-acetylglucosaminy                           | NM_001036740.2  |

|    |               |                                                                     |                 |
|----|---------------|---------------------------------------------------------------------|-----------------|
| 23 | Gene Bckdha   | Bckdha                                                              | NM_007533.5     |
| 18 | Gene B9d2     | B9d2, stumpy, B9 protein domain 2                                   | NM_172148.1     |
| 18 | Gene Tgfb1    | TGF-beta1, Tgf transforming growth factor, beta 1                   | NM_011577.1     |
| 36 | Gene Hnrnpul  | Hnrnpul1, E1BA heterogeneous nuclear ribonucleoprotein U-like 1     | NM_178089.2, NM |
| 36 | Gene Axl      | Ufo, Tyro7, Arl AXL receptor tyrosine kinase                        | NM_009465.4, NM |
| 24 | Gene Cyp2t4   | Gm1448, Gm1 cytochrome P450, family 2, subfamily t, polypeptide     | NM_001100184.1  |
| 24 | Gene Egln2    | Hif-p4h-1, Eglr EGL nine homolog 2 (C. elegans)                     | NM_053208.4     |
| 24 | Gene Rab4b    | 1500031G17Ri RAB4B, member RAS oncogene family                      | NM_029391.2     |
| 24 | Gene Mir3101  | Mir3101, mmu microRNA 3101                                          | NR_037283.1     |
| 26 | Gene Snrpa    | U1A, Rnu1a-1, small nuclear ribonucleoprotein polypeptide A         | NM_015782.3, NM |
| 26 | Gene BC02497  | BC024978 cDNA sequence BC024978                                     | NM_001243888.1  |
| 26 | Gene Mir1191  | Mir1191, mmu microRNA 1191                                          | NR_035422.1     |
| 26 | Gene Itpkc    | 9130023N17Ri inositol 1,4,5-trisphosphate 3-kinase C                | NM_181593.2     |
| 26 | Gene Adck4    | Adck4, 061001 aarF domain containing kinase 4                       | NM_133770.2     |
| 21 | Gene Ltbp4    | MGC175966, L latent transforming growth factor beta binding prot    | NM_175641.2, NM |
| 21 | Gene Shkbp1   | B930062H15Ri Sh3kbp1 binding protein 1                              | NM_138676.2     |
| 17 | Gene Sptbn4   | qv, dyn, Spnb4 spectrin beta, non-erythrocytic 4                    | NM_032610.2, NM |
| 30 | Gene 2310022  | 2310022A10Ri RIKEN cDNA 2310022A10 gene                             | NM_175107.4, NM |
| 30 | Gene Akt2     | PKB, PKBbeta, thymoma viral proto-oncogene 2                        | NM_007434.3, NM |
| 30 | Gene Map3k1   | MST, BC02866 mitogen-activated protein kinase kinase kinase 10      | NM_001081292.1  |
| 30 | Gene C030039  | C030039L03Ri RIKEN cDNA C030039L03 gene                             | NM_198417.2, NM |
| 35 | Gene 9530053  | FCGBP, 9530053A07Ri RIKEN cDNA 9530053A07 gene                      | NM_001164655.1  |
| 35 | Gene Fbl      | AL022665, FLR fibrillar                                             | NM_007991.3     |
| 35 | Gene Dyrk1b   | Dyrk1b, Mirk dual-specificity tyrosine-(Y)-phosphorylation regulat  | NM_010092.1, NM |
| 28 | Gene Eid2     | Cri2, EID-2, Eid EP300 interacting inhibitor of differentiation 2   | NM_198425.2     |
| 28 | Gene Eid2b    | 3010005C08Ri EP300 interacting inhibitor of differentiation 2B      | NM_001177427.1  |
| 28 | Gene BC08949  | MGC107154, S cDNA sequence BC089491                                 | NM_175033.3     |
| 21 | Gene Dll3     | pudgy, Dll3, pu delta-like 3 (Drosophila)                           | NM_007866.2     |
| 21 | Gene Timm50   | AU015082, 28: translocase of inner mitochondrial membrane 50        | NM_025616.3     |
| 21 | Gene Supt5    | AU019549, ALI suppressor of Ty 5                                    | NM_013676.1     |
| 25 | Gene Plekhg2  | Cslg, Plekhg2, ,pleckstrin homology domain containing, family G (w  | NM_001083912.1  |
| 25 | Gene Zfp36    | Tis11, Ttp, Zfp: zinc finger protein 36                             | NM_011756.4     |
| 25 | Gene Med29    | Med29, 28104 mediator complex subunit 29                            | NM_026042.3     |
| 30 | Gene Fbxo27   | E130008B10Ri F-box protein 27                                       | NM_207238.3, NM |
| 29 | Gene Rinl     | MGC51433, Ri Ras and Rab interactor-like                            | NM_177158.5     |
| 29 | Gene Hnrnp1   | C79783, Hnrp1, heterogeneous nuclear ribonucleoprotein L            | NM_177301.5     |
| 37 | Gene Actn4    | C77391, Actn4 actinin alpha 4                                       | NM_021895.2     |
| 37 | Gene Eif3k    | 1200009C21Ri eukaryotic translation initiation factor 3, subunit K  | NM_028659.2     |
| 36 | Gene Rasgrp4  | Rasgrp4 RAS guanyl releasing protein 4                              | NM_001174155.1  |
| 36 | Gene Fam98c   | AV026483, 11: family with sequence similarity 98, member C          | NM_001146023.1  |
| 36 | Gene Spred3   | D130060H24R sprouty-related, EVH1 domain containing 3               | NM_182927.3     |
| 20 | Gene Ggn      | Ggn, MGC102: gametogenetin                                          | NM_182696.2, NM |
| 20 | Gene Psm8     | Psm8, AL033: proteasome (prosome, macropain) 26S subunit, non       | NM_026545.3     |
| 20 | Gene Catsperg | Catsperg, A23( catsper channel auxiliary subunit gamma 1            | NM_001164658.1  |
| 19 | Gene Kcnk6    | Kcnk6, Twik2, , potassium inwardly-rectifying channel, subfamily K, | NM_001033525.3  |
| 19 | Gene Yif1b    | Yip1b, MGC13: Yip1 interacting factor homolog B (S. cerevisiae)     | NM_029887.3, NM |
| 25 | Gene Spint2   | HAI-2, Spint2, , serine protease inhibitor, Kunitz type 2           | NM_011464.2, NM |

|    |              |                                                                                     |                  |
|----|--------------|-------------------------------------------------------------------------------------|------------------|
| 25 | Gene Ppp1r14 | Ppp1r14a, 111 protein phosphatase 1, regulatory (inhibitor) subunit                 | NM_026731.3      |
| 22 | Gene Dpf1    | Dpf1, Neud4 D4, zinc and double PHD fingers family 1                                | NM_013874.2      |
| 22 | Gene 4932431 | 4932431P20Ri RIKEN cDNA 4932431P20 gene                                             | XR_035401.2, XR_ |
| 23 | Gene Zfp14   | 4732429I09Rik zinc finger protein 14                                                | NM_011748.2, NM  |
| 29 | Gene Zfp82   | A030010D05, zinc finger protein 82                                                  | NM_001252519.1,  |
| 29 | Gene Zfp566  | Zfp566, 27000 zinc finger protein 566                                               | NM_152814.2      |
| 18 | Gene Cox7a1  | COX7AH, Cox7 cytochrome c oxidase subunit VIIa 1                                    | NM_009944.3      |
| 18 | Gene Capns1  | Capa-4, Capns: calpain, small subunit 1                                             | NM_009795.3      |
| 28 | Gene Wdr62   | MGC31423, WWD repeat domain 62                                                      | NM_146186.3      |
| 28 | Gene Thap8   | 1700020L13Ril THAP domain containing 8                                              | XR_168670.1, XR_ |
| 27 | Gene Alkbh6  | Abh6, Alkbh6, alkB, alkylation repair homolog 6 (E. coli)                           | NM_198027.2      |
| 27 | Gene Syne4   | Nesp4, 061001 spectrin repeat containing, nuclear envelope family                   | NM_153577.2      |
| 27 | Gene Sdhaf1  | Lym8, 061001 succinate dehydrogenase complex assembly factor 1                      | NM_001033140.3   |
| 18 | Gene Lrfn3   | Lrfn3, A53004 leucine rich repeat and fibronectin type III domain c                 | NM_175478.2      |
| 19 | Gene Wbp7    | mKIAA0304, WW domain binding protein 7                                              | NM_029274.2      |
| 19 | Gene Zbtb32  | PLZP, FAZF, Tzl zinc finger and BTB domain containing 32                            | NM_021397.2      |
| 33 | Gene Atp4a   | Atp4a ATPase, H <sup>+</sup> /K <sup>+</sup> exchanging, gastric, alpha polypeptide | NM_018731.2      |
| 33 | Gene Tmem14  | 5033425B17Ri transmembrane protein 147                                              | NM_027215.2      |
| 33 | Gene C630016 | C630016N16Ri RIKEN cDNA C630016N16 gene                                             | XR_107875.1, XR_ |
| 33 | Gene Gapdhs  | Gapds, Gapdh: glyceraldehyde-3-phosphate dehydrogenase, sperm                       | NM_008085.1      |
| 31 | Gene Usf2    | Usf-2, MGC91 upstream transcription factor 2                                        | NM_011680.2      |
| 31 | Gene Gm4673  | Gm4673 predicted gene 4673                                                          | XR_107876.1, XR_ |
| 31 | Gene Lsr     | ILDR3, Lsr, Lisc lipolysis stimulated lipoprotein receptor                          | NM_017405.2, NM  |
| 20 | Gene Fam187l | 1700020B09Ri family with sequence similarity 187, member B                          | NM_175240.4, NM  |
| 20 | Gene Fxyd5   | Fxyd5, RIC, EF-FXYD domain-containing ion transport regulator 5                     | NM_008761.3, NM  |
| 20 | Gene Fxyd7   | Fxyd7, 111003 FXYD domain-containing ion transport regulator 7                      | NM_022007.1      |
| 20 | Gene Fxyd1   | 0610012C17Ri FXYD domain-containing ion transport regulator 1                       | NM_194321.2, NM  |
| 20 | Gene Lgi4    | Lgi3, clp, Lgi4, leucine-rich repeat LGI family, member 4                           | NM_144556.2      |
| 25 | Gene Gramd1  | Gramd1a, AW! GRAM domain containing 1A                                              | NM_027898.3      |
| 22 | Gene Uba2    | UBA1, Uble1b, ubiquitin-like modifier activating enzyme 2                           | NM_016682.2      |
| 22 | Gene Gm1277  | Gm12778, OTI predicted gene 12778                                                   |                  |
| 39 | Gene Pcd2l   | 6030457N17Ri programmed cell death 2-like                                           | NM_026549.3      |
| 39 | Gene Gpi1    | MF, Gpi-1t, Gp glucose phosphate isomerase 1                                        | NM_008155.3, XM  |
| 27 | Gene Lsm14a  | Tral, 2700023E LSM14 homolog A (SCD6, S. cerevisiae)                                | NM_025948.2      |
| 23 | Gene Kctd15  | MGC25497, Kc potassium channel tetramerisation domain containi                      | NM_146188.1      |
| 15 | Gene Chst8   | AI426009, Chs: carbohydrate (N-acetylgalactosamine 4-O) sulfotran:                  | NM_175140.4      |
| 32 | Gene Pepd    | Pep-4, Pep4, P peptidase D                                                          | NM_008820.2      |
| 30 | Gene Cebpg   | Gpe1bp, Ig/EB CCAAT/enhancer binding protein (C/EBP), gamma                         | NM_009884.3      |
| 32 | Gene Cebpa   | Cebp, CBF-A, CCAAT/enhancer binding protein (C/EBP), alpha                          | NM_007678.3      |
| 27 | Gene Nudt19  | D7Rp2-r, D7Rp nudix (nucleoside diphosphate linked moiety X)-type                   | NM_033080.2      |
| 31 | Gene Rgs9bp  | Rgs9-1bp, Rgs! regulator of G-protein signalling 9 binding protein                  | NM_145840.3      |
| 32 | Gene Ankrd27 | Varp, Ankrd27 ankyrin repeat domain 27 (VPS9 domain)                                | NM_145633.3, NM  |
| 32 | Gene Pcd5    | Tfar19, Pcd5, programmed cell death 5                                               | NM_019746.4      |
| 21 | Gene Dpy19l3 | 6030410G08, l dpy-19-like 3 (C. elegans)                                            | NM_178704.3      |
| 35 | Gene Zfp507  | Znf507, AU021 zinc finger protein 507                                               | NM_177739.3      |
| 35 | Gene E130304 | E130304I02Rik RIKEN cDNA E130304I02 gene                                            | NR_033567.1      |
| 31 | Gene Tshz3   | Tshz3, Tsh3, KI teashirt zinc finger family member 3                                | NM_172298.2      |

|    |                   |                                                                     |                  |
|----|-------------------|---------------------------------------------------------------------|------------------|
| 29 | Gene Uri1         | NNX3, Rmp, CŒURI1, prefoldin-like chaperone                         | NM_011274.5      |
| 27 | Gene Zfp619       | MGC91101, Zf zinc finger protein 619                                | NM_001004139.2   |
| 19 | Gene Zfp715       | Zfp715, 26100.zinc finger protein 715                               | NM_027264.3      |
| 35 | Gene 1700028      | 1700028J19RiŒRIKEN cDNA 1700028J19 gene                             | NR_029436.1      |
| 35 | Gene 2410002      | MGC69849, M RIKEN cDNA 2410002F23 gene                              | NM_025880.4      |
| 35 | Gene Snord88      | Snord88c, MBI small nucleolar RNA, C/D box 88C                      | NR_028534.1      |
| 35 | Gene Snord88      | MBII-211, Snois small nucleolar RNA, C/D box 88A                    | NR_028533.1      |
| 35 | Gene Acpt         | Acpt, Gm1432, acid phosphatase, testicular                          | NM_001195034.1   |
| 29 | Gene Clec11a      | AW457320, Sc C-type lectin domain family 11, member a               | NM_009131.3      |
| 29 | Gene Shank1       | Shank1                                                              | NM_001034115.1   |
| 25 | Gene 1700008      | 1700008O03Rik                                                       | NM_027049.1      |
| 27 | Gene Pold1        | Pold1, 125kDa polymerase (DNA directed), delta 1, catalytic subuni  | NM_011131.3      |
| 27 | Gene Nr1h2        | AI194859, Nr1 nuclear receptor subfamily 1, group H, member 2       | NM_009473.2      |
| 32 | Gene Atf5         | ODA-10, AFTA, activating transcription factor 5                     | NM_030693.2, NR  |
| 32 | Gene Nup62-il4i1  | Nup62-Il4i1 protein                                                 | NM_001171024.1   |
| 32 | Gene Nup62        | AA589433, AI4 nucleoporin 62                                        | NM_053074.1      |
| 26 | Gene Tbc1d17      | MGC27642, BŒTBC1 domain family, member 17                           | NM_001042655.1   |
| 31 | Gene Akt1s1       | Lobe, Akt1s1, ŒAKT1 substrate 1 (proline-rich)                      | NM_001253920.1   |
| 26 | Gene Mir707       | Mirn707, Mir7 microRNA 707                                          | NR_030488.1      |
| 31 | Gene Pnkp         | Pnkp, 181000Œ polynucleotide kinase 3'- phosphatase                 | NM_021549.2      |
| 31 | Gene Ptov1        | Ptov1, AU0417 prostate tumor over expressed gene 1                  | NM_133949.1      |
| 31 | Gene Med25        | 2610034E13Ri mediator of RNA polymerase II transcription, subuni    | NM_029365.2      |
| 32 | Gene Ap2a1        | Ap2a1, Adtaa adaptor-related protein complex 2, alpha 1 subunit     | NM_007458.2, NM  |
| 18 | Gene Bcl2l12      | Bcl-L12, Bcl2l1 BCL2-like 12 (proline rich)                         | NM_029410.3      |
| 18 | Gene Irf3         | IRF-3, Irf3, MG interferon regulatory factor 3                      | NM_016849.4, NR  |
| 18 | Gene Scaf1        | AI480556, ScaŒSR-related CTD-associated factor 1                    | NM_001008422.1   |
| 18 | Gene Rras         | AI573426, Rra: Harvey rat sarcoma oncogene, subgroup R              | NM_009101.2      |
| 22 | Gene Prr12        | BC058674, 67Œproline rich 12                                        | NM_175022.2      |
| 22 | Gene Prrg2        | N4WBP1, 160Œ (proline-rich Gla (G-carboxyglutamic acid) polypeptid  | NM_022999.1      |
| 21 | Gene Nosip        | Nosip, 231006 nitric oxide synthase interacting protein             | NM_025533.3, NM  |
| 21 | Gene Rcn3         | 6030455P07Ri reticulocalbin 3, EF-hand calcium binding domain       | NM_026555.2      |
| 26 | Gene Aldh16a      | 2410004H02Ri aldehyde dehydrogenase 16 family, member A1            | NM_145954.1      |
| 26 | Gene Pih1d1       | 1110061L23RiŒPIH1 domain containing 1                               | NM_029406.3      |
| 26 | Gene Slc17a7      | 2900052E22Ri solute carrier family 17 (sodium-dependent inorgan     | NM_182993.2      |
| 22 | Gene Slc6a16      | Slc6a16, Gm1Œ solute carrier family 6, member 16                    | XM_355900.6, XM  |
| 22 | Gene 1700039      | 1700039E15Ri RIKEN cDNA 1700039E15 gene                             | NM_001033176.1   |
| 21 | Gene Ppfia3       | Ppfia3, 241012 protein tyrosine phosphatase, receptor type, f polyp | NM_029741.2      |
| 21 | Gene Mtag2        | Mtag2, MAG metastasis associated gene 2                             | NR_027802.1, NR_ |
| 21 | Gene Lin7b        | MALS-2, Veli2, lin-7 homolog B (C. elegans)                         | NM_011698.1      |
| 21 | Gene Ssrnp70      | Ssrnp70, R7480 small nuclear ribonucleoprotein 70 (U1)              | NM_009224.4      |
| 20 | Gene Kcna7        | Kcna7, Kv1.7 potassium voltage-gated channel, shaker-related su     | NM_010596.2      |
| 20 | Gene Ntf5         | NT4/5, NT4, NŒ neurotrophin 5                                       | NM_198190.1      |
| 20 | Gene LOC100862214 | uncharacterized LOC100862214                                        | XM_003688836.1,  |
| 20 | Gene Lhb          | LH, leutropin, Œluteinizing hormone beta                            | NM_008497.2      |
| 20 | Gene Ruvbl2       | p47, Ruvbl2, N RuvB-like protein 2                                  | NM_011304.3      |
| 17 | Gene Gys1         | Gys3, Gys1, MŒ glycogen synthase 1, muscle                          | NM_030678.3      |
| 25 | Gene Car11        | Ca11, Car11                                                         | NM_009800.4      |



|    |              |                 |                                                       |                  |
|----|--------------|-----------------|-------------------------------------------------------|------------------|
| 47 | Gene Dbp     | Dbp             | D site albumin promoter binding protein               | NM_016974.3      |
| 47 | Gene Sphk2   | Sphk2, MGC10    | sphingosine kinase 2                                  | NM_001172561.1   |
| 47 | Gene Rpl18   | L18, Rpl18a, R1 | ribosomal protein L18                                 | NM_009077.2      |
| 47 | Gene Fam83e  | 4930403C10Ri    | family with sequence similarity 83, member E          | NM_001033170.4   |
| 47 | Gene Spaca4  | Spaca4, Samp1   | sperm acrosome associated 4                           | NM_027055.3      |
| 23 | Gene Gm5897  | Gm5897, EG54    | predicted gene 5897                                   | XR_107904.1, XR_ |
| 23 | Gene Lmtk3   | Lmtk3, aatyk3,  | lemur tyrosine kinase 3                               | NM_001005511.2   |
| 22 | Gene Cyth2   | ARNO, CLM2,     | (cytohesin 2                                          | NM_011181.3, NM  |
| 29 | Gene Kcnj14  | Kcnj14, MGC21   | potassium inwardly-rectifying channel, subfamily J, i | NM_145963.2      |
| 29 | Gene Grwd1   | Wdr28, AI5043   | glutamate-rich WD repeat containing 1                 | NM_153419.2      |
| 29 | Gene Grin2d  | NMDAR2D, Gr     | glutamate receptor, ionotropic, NMDA2D (epsilon 4     | NM_008172.2      |
| 25 | Gene Kdelr1  | AW215843, Kc    | KDEL (Lys-Asp-Glu-Leu) endoplasmic reticulum prote    | NM_133950.2      |
| 23 | Gene Tmem14  | 2310076O21Ri    | transmembrane protein 143                             | NM_144801.2      |
| 23 | Gene Emp3    | H4, HNMP-1,     | epithelial membrane protein 3                         | NM_010129.2, NM  |
| 29 | Gene Abcc6   | DCC, Dyscalc1,  | ATP-binding cassette, sub-family C (CFTR/MRP), mer    | NM_018795.2      |
| 29 | Gene Nomo1   | MGC37454, M     | nodal modulator 1                                     | NM_153057.4      |
| 18 | Gene Myod1   | bHLHc1, AI503   | myogenic differentiation 1                            | NM_010866.2      |
| 29 | Gene Hps5    | C85120, MGC5    | Hermansky-Pudlak syndrome 5 homolog (human)           | NM_001005247.2   |
| 29 | Gene Gtf2h1  | AW743425, AI    | general transcription factor II H, polypeptide 1      | NM_008186.4      |
| 33 | Gene Gm5331  | Gm5331, EG38    | predicted gene 5331                                   | XM_914983.3, XM  |
| 33 | Gene LdhA    | Ldh1, I7R2,     | Ldl lactate dehydrogenase A                           | NM_010699.2, NM  |
| 32 | Gene Tsg101  | CC2, Tsg101,    | A tumor susceptibility gene 101                       | NM_021884.3      |
| 32 | Gene Uevld   | Uevld, Atp,     | 84 UEV and lactate/malate dehydrogenase domains       | NM_001040695.1   |
| 20 | Gene C86187  | C86187          | expressed sequence C86187                             | NR_015609.1      |
| 31 | Gene Spty2d1 | 5830435K17Ri    | SPT2, Suppressor of Ty, domain containing 1 (S. cere  | NM_175318.4      |
| 34 | Gene Tmem86  | AI414959, Tm    | transmembrane protein 86A                             | NM_026436.3      |
| 32 | Gene E2f8    | E2f8, 4432406   | E2F transcription factor 8                            | NM_001013368.5   |
| 32 | Gene Gm2788  | Gm2788          | predicted gene 2788                                   | XR_107905.2, XR_ |
| 44 | Gene Nav2    | mKIAA3015, A    | neuron navigator 2                                    | NM_175272.3, NM  |
| 24 | Gene Htatip2 | Htatip2, Tip30, | HIV-1 tat interactive protein 2, homolog (human)      | NM_016865.3, NM  |
| 24 | Gene Prmt3   | 2010005E20Ri    | protein arginine N-methyltransferase 3                | NM_133740.2      |
| 20 | Gene Cyfip1  | Cyfip1, Sra1,   | K cytoplasmic FMR1 interacting protein 1              | NM_011370.3, NM  |
| 27 | Gene Nipa2   | 3830408P04Ri    | non imprinted in Prader-Willi/Angelman syndrome 2     | NM_001256130.1   |
| 27 | Gene A230056 | A230056P14Ri    | RIKEN cDNA A230056P14 gene                            | NR_015495.2      |
| 20 | Gene Gabra5  | A230018I05Ri    | gamma-aminobutyric acid (GABA) A receptor, subur      | NM_176942.4      |
| 21 | Gene Atp10a  | pfatp, Atp10a,  | ATPase, class V, type 10A                             | NM_009728.2      |
| 34 | Gene Ube3a   | mKIAA4216, A    | ubiquitin protein ligase E3A                          | NM_011668.2, NM  |
| 20 | Gene Mkrn3   | Zfp127, D7H15   | makorin, ring finger protein, 3                       | NM_011746.2      |
| 21 | Gene Peg12   | Peg12, Frat3    | paternally expressed 12                               | NM_013788.2      |
| 40 | Gene Klf13   | Klf13, FKLF-2,  | Kruppel-like factor 13                                | NM_021366.3      |
| 24 | Gene Fam189a | Fam189a1, AM    | family with sequence similarity 189, member A1        | NM_183087.4      |
| 24 | Gene Ndnl2   | Ndnl2, AI6421   | neccin-like 2                                         | NM_023239.4      |
| 25 | Gene Gm7546  | EG665234, Gr    | predicted gene 7546                                   | XM_003086612.1,  |
| 25 | Gene Tarsl2  | MGC31414, A5    | threonyl-tRNA synthetase-like 2                       | NM_172310.2      |
| 17 | Gene Tm2d3   | Tm2d3, 11100    | TM2 domain containing 3                               | NM_026795.3, NM  |
| 32 | Gene Pcsk6   | Pace4, Pcsk6,   | proprotein convertase subtilisin/kexin type 6         | NM_011048.1      |
| 49 | Gene Snrpa1  | Snrpa1, 15000   | small nuclear ribonucleoprotein polypeptide A'        | NM_021336.4      |

|    |              |                                                                     |                  |
|----|--------------|---------------------------------------------------------------------|------------------|
| 49 | Gene Vimp    | Sels, H-47, H4, Vimp, 1500011E07Rik, H47, C78786, H-4               | NM_024439.3      |
| 30 | Gene Chsy1   | KIAA0990, mKl chondroitin sulfate synthase 1                        | NM_001081163.1   |
| 23 | Gene Lrrk1   | MGC28646, m leucine-rich repeat kinase 1                            | NM_146191.3      |
| 23 | Gene Aldh1a3 | RALDH3, ALDH aldehyde dehydrogenase family 1, subfamily A3          | NM_053080.3      |
| 29 | Gene Adamts1 | Adamts17, AU023434                                                  | NM_001033877.4   |
| 35 | Gene Mef2a   | A430079H05R myocyte enhancer factor 2A                              | NM_001033713.1   |
| 39 | Gene Synm    | Synemin, E130 synemin, intermediate filament protein                | NM_201639.2, NM  |
| 32 | Gene Igf1r   | IGF-1R, A3301 insulin-like growth factor I receptor                 | NM_010513.2      |
| 30 | Gene Arrdc4  | AV216361, Arr arrestin domain containing 4                          | NM_001042592.2   |
| 29 | Gene Nr2f2   | COUP-TF2, Apr nuclear receptor subfamily 2, group F, member 2       | NM_183261.3, NM  |
| 29 | Gene B130024 | B130024G19Ri RIKEN cDNA B130024G19 gene                             | NR_045850.1      |
| 23 | Gene A730056 | A730056A06Ri RIKEN cDNA A730056A06 gene                             | NR_040324.1, NR_ |
| 23 | Gene Rgma    | MGC69915, BC RGM domain family, member A                            | NM_177740.5      |
| 30 | Gene 1810026 | 1810026B05Ri RIKEN cDNA 1810026B05 gene                             | NR_037569.1      |
| 23 | Gene Gm7710  | Gm7710, EG66 predicted gene 7710                                    | XR_107915.1, XR_ |
| 28 | Gene Fam174l | MGC31276, Fa family with sequence similarity 174, member B          | NM_001162532.1   |
| 21 | Gene St8sia2 | St8sia2, STX, A ST8 alpha-N-acetyl-neuraminide alpha-2,8-sialyltran | NM_009181.2      |
| 24 | Gene Slco3a1 | Slco3a1, MJAN solute carrier organic anion transporter family, mem  | NM_001038643.1   |
| 24 | Gene Akap13  | PROTO-LB, LBCA kinase (PRKA) anchor protein 13                      | NM_029332.1      |
| 27 | Gene Mir7-2  | Mirn7-2, mmu microRNA 7-2                                           | NR_029826.1      |
| 27 | Gene Aen     | Isg20l1, Aen, 2 apoptosis enhancing nuclease                        | NM_026531.4, NM  |
| 28 | Gene Abhd2   | Labh-2, LABH2 abhydrolase domain containing 2                       | NM_018811.6      |
| 25 | Gene Polg    | PolgA, AA4095 polymerase (DNA directed), gamma                      | NM_017462.2      |
| 25 | Gene Gm1061  | Gm10616, ENS predicted gene 10616                                   | XR_105123.1      |
| 33 | Gene Ticrr   | Ticrr, 5730590 TOPBP1-interacting checkpoint and replication regu   | NM_029835.1      |
| 23 | Gene Kif7    | Kif7, MGC176C kinesin family member 7                               | NM_010626.2      |
| 23 | Gene Plin1   | 6030432J05Ri perilipin 1                                            | NM_175640.2, NM  |
| 23 | Gene Zfp710  | AI324798, 543 zinc finger protein 710                               | NM_175433.5, NM  |
| 22 | Gene Gm2105  | Gm21057 predicted gene, 21057                                       | NR_045695.1      |
| 41 | Gene Idh2    | Idh-2, IDPm, E isocitrate dehydrogenase 2 (NADP+), mitochondrial    | NM_173011.2      |
| 29 | Gene Sema4b  | Semac, KIAA17 sema domain, immunoglobulin domain (Ig), transme      | NM_013659.4      |
| 24 | Gene Cib1    | Cib1, Kip, Cibki calcium and integrin binding 1 (calmyrin)          | NM_011870.4      |
| 24 | Gene Gdpgp1  | Gdpgp1, D330012F22Rik                                               | NM_178752.3      |
| 26 | Gene Ttl13   | Ttl13, 492153 tubulin tyrosine ligase-like family, member 13        | NM_177765.3      |
| 26 | Gene Ngrn    | Ngrn, AW5520 neugrin, neurite outgrowth associated                  | NM_031375.4, NR  |
| 27 | Gene Vps33b  | Vps33b, MGC3 vacuolar protein sorting 33B (yeast)                   | NM_178070.4      |
| 27 | Gene Prc1    | MGC6745, Prc protein regulator of cytokinesis 1                     | NM_145150.2      |
| 19 | Gene Unc45a  | AW538196, Ur unc-45 homolog A (C. elegans)                          | NM_133952.2      |
| 19 | Gene Hddc3   | C86475, Hddc3 HD domain containing 3                                | NM_026812.2      |
| 24 | Gene Man2a2  | MX, AI480988, mannosidase 2, alpha 2                                | NM_172903.4      |
| 24 | Gene Fes     | BB137047, AI5 feline sarcoma oncogene                               | NM_010194.2      |
| 23 | Gene Furin   | Pcsk3, SPC1, P. furin (paired basic amino acid cleaving enzyme)     | NM_011046.2, NM  |
| 40 | Gene Crtc3   | AI429792, BC0 CREB regulated transcription coactivator 3            | NM_173863.2      |
| 26 | Gene Iqgap1  | mKIAA0051, A IQ motif containing GTPase activating protein 1        | NM_016721.2      |
| 33 | Gene Zscan2  | Zscan2, Zfp29, zinc finger and SCAN domain containing 2             | NM_009553.2      |
| 22 | Gene Zfp592  | Zfp592, A7300 zinc finger protein 592                               | NM_178707.4      |
| 25 | Gene Pde8a   | Pde8a, Pde8, P phosphodiesterase 8A                                 | NM_008803.2      |

|    |                   |                                                                                |                  |
|----|-------------------|--------------------------------------------------------------------------------|------------------|
| 38 | Gene Rps17        | MGC107579, Ribosomal protein S17                                               | NM_009092.3      |
| 38 | Gene Cpeb1        | Cpeb, AU0241 cytoplasmic polyadenylation element binding protein               | NM_001252525.1   |
| 16 | Gene Ap3b2        | AU042881, AP3 adaptor-related protein complex 3, beta 2 subunit                | NM_021492.3      |
| 37 | Gene Fsd2         | 9830160G03Ri fibronectin type III and SPRY domain containing 2                 | NM_172904.2      |
| 37 | Gene Whamm        | KIAA1971, MG WAS protein homolog associated with actin, golgi membrane protein | NM_001004185.3   |
| 28 | Gene Fam103i      | Fam103a1, 26: family with sequence similarity 103, member A1                   | NM_025997.2      |
| 35 | Gene Btdb1        | Btdb1, 119000 BTB (POZ) domain containing 1                                    | NM_146193.2      |
| 19 | Gene Tm6sf1       | BC023123, C6: transmembrane 6 superfamily member 1                             | NM_145375.3      |
| 21 | Gene Hdgfrp3      | HRP-3, Hdgfrp: hepatoma-derived growth factor, related protein 3               | NM_013886.4      |
| 23 | Gene Bnc1         | Bnc, Bnc1, AW basонуclin 1                                                     | NM_007562.2      |
| 27 | Gene Fam154i      | D030069K18, F family with sequence similarity 154, member B                    | NM_177894.4      |
| 27 | Gene Eftud1       | AU019507, 60: elongation factor Tu GTP binding domain containing               | NM_175317.3, NM  |
| 43 | Gene 1700010      | 1700010L04Ri RIKEN cDNA 1700010L04 gene                                        | XR_107922.1, XR_ |
| 43 | Gene Mex3b        | 4931439A04Ri mex3 homolog B (C. elegans)                                       | NM_175366.3      |
| 49 | Gene Mesdc1       | Mesdc1, AW0: mesoderm development candidate 1                                  | NM_030705.4      |
| 49 | Gene Mesdc2       | AW537813, M mesoderm development candidate 2                                   | NM_023403.3      |
| 39 | Gene Abhd17c      | Fam108c1, Abl abhydrolase domain containing 17C                                | NM_133722.2      |
| 16 | Gene Gm2115       | Gm2115, C777 predicted gene 2115                                               | NR_045098.1      |
| 25 | Gene Fzd4         | Fzd4, Fz4 frizzled homolog 4 (Drosophila)                                      | NM_008055.4      |
| 21 | Gene 2310010      | 2310010J17Ri RIKEN cDNA 2310010J17 gene                                        | NR_046006.1, NR_ |
| 21 | Gene Picalm       | mKIAA4114, Piphosphatidylinositol binding clathrin assembly protein            | NM_001252520.1,  |
| 33 | Gene Crebzf       | LAZipII, SMILE, CREB/ATF bZIP transcription factor                             | NM_145151.2      |
| 33 | Gene Tmem12       | Tmem126a, 18 transmembrane protein 126A                                        | NM_025460.2      |
| 28 | Gene Ankrd42      | 4931426M20, ankyrin repeat domain 42                                           | NM_028665.4      |
| 28 | Gene Pcf11        | KIAA0824, Pcf: cleavage and polyadenylation factor subunit homolog             | NM_029078.3      |
| 21 | Gene Fam181i      | A830059I20Ri family with sequence similarity 181, member B                     | NM_021427.2      |
| 29 | Gene Tenm4        | mKIAA1302, O teneurin transmembrane protein 4                                  | NM_011858.3      |
| 22 | Gene Gab2         | p97, Gab2, A14 growth factor receptor bound protein 2-associated protein       | NM_010248.2, NM  |
| 23 | Gene Usp35        | Gm1088, Usp3 ubiquitin specific peptidase 35                                   | NM_001177412.1   |
| 23 | Gene Kctd21       | EG622320, Kct potassium channel tetramerisation domain containing              | NM_001039039.3   |
| 31 | Gene Aamdc        | 1810020D17Ri adipogenesis associated Mth938 domain containing                  | NM_001177945.1,  |
| 31 | Gene Rsf1         | Gm164, MGC9 remodeling and spacing factor 1                                    | NM_001081267.2   |
| 21 | Gene LOC101055679 | uncharacterized LOC101055679                                                   | XM_003945415.1   |
| 21 | Gene Clns1a       | ICLN, Clci, 261: chloride channel, nucleotide-sensitive, 1A                    | NM_023671.2      |
| 19 | Gene Myo7a        | sh1, Myo7a, U myosin VIIA                                                      | NM_008663.2, NM  |
| 21 | Gene Capn5        | Capn5                                                                          | NM_007602.3      |
| 21 | Gene Gm1693       | Gm16938 predicted gene, 16938                                                  | NR_045969.1, NR_ |
| 29 | Gene Acer3        | 1110057L18Ri alkaline ceramidase 3                                             | NM_025408.2      |
| 20 | Gene Tsku         | Lrrc54, Tsku, E2ig4, Tsk, 9530051K01Rik                                        | NM_001024619.3,  |
| 19 | Gene Lrrc32       | Lrrc32, EG434: leucine rich repeat containing 32                               | NM_001113379.1,  |
| 29 | Gene 2210018      | 2210018M11R RIKEN cDNA 2210018M11 gene                                         | NM_172280.2      |
| 18 | Gene Wnt11        | Wnt11 wingless-related MMTV integration site 11                                | NM_009519.2      |
| 34 | Gene Uvrug        | AI648770, Uvr: UV radiation resistance associated gene                         | NM_178635.3      |
| 23 | Gene Dgat2        | ARAT, DGAT-2, diacylglycerol O-acyltransferase 2                               | NM_026384.3      |
| 23 | Gene Map6         | Mtap6, Map-6 microtubule-associated protein 6                                  | NM_010837.3, NM  |
| 23 | Gene Serpinh1     | Hsp47, Cbp2, Eserine (or cysteine) peptidase inhibitor, clade H, member 1      | NM_009825.2, NM  |
| 29 | Gene Gdpd5        | BC024955, MG glycerophosphodiester phosphodiesterase domain containing         | NM_201352.2      |

|    |              |                                                                      |                  |
|----|--------------|----------------------------------------------------------------------|------------------|
| 29 | Gene Kihl35  | 2810406K13Rik, Kihl35                                                | NM_028145.1      |
| 29 | Gene Rps3    | Rs_3, Rps3, D7 ribosomal protein S3                                  | NM_012052.2      |
| 27 | Gene Snord15 | Rnu15-b, Snor: small nucleolar RNA, C/D box 14B                      | NR_002173.1      |
| 27 | Gene Snord15 | Rnu15-a, Snor: small nucleolar RNA, C/D box 15A                      | NR_002172.1      |
| 27 | Gene Gm4980  | Tpbgl, EG2451 predicted gene 4980                                    | NM_001195529.1   |
| 20 | Gene Rnf169  | Rnf169, 29000 ring finger protein 169                                | NM_175388.3      |
| 30 | Gene Pold3   | P68, Pold3, P6 polymerase (DNA-directed), delta 3, accessory subunit | NM_133692.2      |
| 37 | Gene Lipt2   | 2610209A20Ri lipoyl(octanoyl) transferase 2 (putative)               | NM_026010.2      |
| 20 | Gene Pgm2l1  | Pgm2l1, 49314 phosphoglucomutase 2-like 1                            | NM_027629.3      |
| 20 | Gene P4ha3   | P4ha3, D9300: procollagen-proline, 2-oxoglutarate 4-dioxygenase (    | NM_177161.4      |
| 21 | Gene Ucp2    | Ucp2, Slc25a8 uncoupling protein 2 (mitochondrial, proton carrier)   | NM_011671.4      |
| 21 | Gene Dnajb13 | Dnajb13, Tsar: DnaJ (Hsp40) related, subfamily B, member 13          | NM_153527.2      |
| 47 | Gene Mrpl48  | D4Erd786e, 1. mitochondrial ribosomal protein L48                    | NM_198831.2, NR  |
| 47 | Gene Rab6a   | Rab6a, AA419671, Rab6, 2610028L11Rik                                 | NM_024287.4, NM  |
| 25 | Gene Relt    | E430021K24Ri RELT tumor necrosis factor receptor                     | NM_177073.6      |
| 40 | Gene Arhgef1 | 8030463K16, ERho guanine nucleotide exchange factor (GEF) 17         | NM_001081116.1   |
| 40 | Gene P2ry6   | P2ry6, 201020 pyrimidinergic receptor P2Y, G-protein coupled, 6      | NM_183168.2      |
| 25 | Gene Fchsd2  | mKIAA0769, B: FCH and double SH3 domains 2                           | NM_199012.2, NM  |
| 20 | Gene Clpb    | Skd3, AL11824 ClpB caseinolytic peptidase B                          | NM_009191.3      |
| 38 | Gene Inpp1l  | Inpp1l, 51C, SH inositol polyphosphate phosphatase-like 1            | NM_010567.2, NM  |
| 38 | Gene Folr2   | FBP2, Folbp-2, folate receptor 2 (fetal)                             | NM_008035.2      |
| 31 | Gene Numa1   | Numa1, AL022 nuclear mitotic apparatus protein 1                     | NM_133947.3      |
| 32 | Gene Nup98   | Nup96, Nup98 nucleoporin 98                                          | NM_022979.1      |
| 19 | Gene Rhog    | Arhg, 2810426 ras homolog gene family, member G                      | NM_019566.3      |
| 19 | Gene Stim1   | Stim1, SIM stromal interaction molecule 1                            | NM_009287.4      |
| 20 | Gene Apbb1   | Rir, Fe65, Apbl amyloid beta (A4) precursor protein-binding, family  | NM_001253885.1   |
| 20 | Gene Hpx     | Hpx, Hpxn, hx hemopexin                                              | NM_017371.2      |
| 15 | Gene Timm10  | Tim10b, Timm translocase of inner mitochondrial membrane 10B         | NM_019502.2      |
| 25 | Gene Rrp8    | Rrp8, AW5381 ribosomal RNA processing 8, methyltransferase, hor      | NM_133951.1, NM  |
| 25 | Gene Ilk     | Ilk, AA511515, integrin linked kinase                                | NM_010562.2, NM  |
| 25 | Gene Taf10   | Taf10, TAFII30, TAF10 RNA polymerase II, TATA box binding protein    | NM_020024.3      |
| 25 | Gene Tpp1    | TPP-I, Cln2, Tp tripeptidyl peptidase I                              | NM_009906.5      |
| 25 | Gene Dchs1   | PCDH16, CDH2 dachsous 1 (Drosophila)                                 | NM_001162943.1   |
| 38 | Gene Mrpl17  | Mrpl17, MRP-I mitochondrial ribosomal protein L17                    | NM_025301.2      |
| 21 | Gene Nlrp10  | Nlrp10, 64305 NLR family, pyrin domain containing 10                 | NM_175532.3      |
| 21 | Gene Eif3f   | 0610037M02R eukaryotic translation initiation factor 3, subunit F    | NM_025344.2      |
| 18 | Gene Stk33   | Stk33, AW061: serine/threonine kinase 33                             | NM_054103.1      |
| 18 | Gene 1700095 | 1700095J03Ri RIKEN cDNA 1700095J03 gene                              | XR_105148.3, XR_ |
| 18 | Gene Trim66  | Kiaa0298-hp, T: tripartite motif-containing 66                       | NM_181853.4, NM  |
| 39 | Gene Rpl27a  | MGC66730, L2 ribosomal protein L27A                                  | NM_011975.3      |
| 39 | Gene Snora3  | MBI-28, Snora: small nucleolar RNA, H/ACA box 3                      | NR_028079.1      |
| 39 | Gene St5     | St5, 2010004N suppression of tumorigenicity 5                        | NM_001001326.1   |
| 26 | Gene Tmem9k  | Tmem9b, ICRF TMEM9 domain family, member B                           | NM_020050.1      |
| 26 | Gene 4930431 | 4930431P19Ri RIKEN cDNA 4930431P19 gene                              | XR_168434.1, XR_ |
| 26 | Gene Nrip3   | A330103B05Ri nuclear receptor interacting protein 3                  | NM_020610.1      |
| 39 | Gene Ipo7    | C330016G14, I: importin 7                                            | NM_181517.3      |
| 48 | Gene Wee1    | Wee1A, Wee1 WEE 1 homolog 1 (S. pombe)                               | NM_009516.3      |

|    |               |                                                                       |                  |
|----|---------------|-----------------------------------------------------------------------|------------------|
| 22 | Gene Swap70   | Swap70, AV23 SWA-70 protein                                           | NM_009302.3      |
| 20 | Gene Ampd3    | Ampd3 adenosine monophosphate deaminase 3                             | NM_009667.2      |
| 32 | Gene Rnf141   | Rnf141, AA792 ring finger protein 141                                 | NM_025999.3      |
| 32 | Gene Lyve1    | Lyve-1, Crsbp- lymphatic vessel endothelial hyaluronan receptor 1     | NM_053247.4      |
| 24 | Gene Ctr9     | Tsp, Tsbp, KIAA Ctr9, Paf1/RNA polymerase II complex component, I     | NM_009431.2      |
| 31 | Gene Eif4g2   | DAP-5, p97, E1 eukaryotic translation initiation factor 4, gamma 2    | NM_013507.3, NM  |
| 29 | Gene Gm3960   | Gm3960 predicted gene 3960                                            | XR_168435.1, XR_ |
| 29 | Gene Usp47    | MGC118655, 4 ubiquitin specific peptidase 47                          | NM_133758.3, NM  |
| 21 | Gene Mical2   | Mical2, mKIAA microtubule associated monooxygenase, calponin a        | NM_177282.5, NM  |
| 19 | Gene Parva    | 2010012A22Ri parvin, alpha                                            | NM_020606.5      |
| 32 | Gene 2310014  | 2310014F06Ri RIKEN cDNA 2310014F06 gene                               | XR_107937.1, XR_ |
| 32 | Gene Tead1    | Tead1, Gtrgeo: TEA domain family member 1                             | NM_009346.3, NM  |
| 28 | Gene Btdb10   | Btdb10, 11100 BTB (POZ) domain containing 10                          | NM_133700.2      |
| 28 | Gene Far1     | 2600011M19R fatty acyl CoA reductase 1                                | NM_027379.2, NM  |
| 27 | Gene Rras2    | TC21, 261001ε related RAS viral (r-ras) oncogene homolog 2            | NM_025846.2      |
| 28 | Gene Copb1    | Copb1, 261001 coatomer protein complex, subunit beta 1                | NM_033370.3      |
| 28 | Gene Psma1    | HC2, Psma1, C proteasome (prosome, macropain) subunit, alpha ty       | NM_011965.2      |
| 23 | Gene 4933406  | 4933406I18Ri RIKEN cDNA 4933406I18 gene                               | NR_029437.1, NR_ |
| 23 | Gene Pde3b    | AI847709, Pde phosphodiesterase 3B, cGMP-inhibited                    | NM_011055.2      |
| 34 | Gene Pik3c2a  | PI3KC2, Pik3c2 phosphatidylinositol 3-kinase, C2 domain containing    | NM_011083.2      |
| 41 | Gene Rps15a   | Rps15a, A630C ribosomal protein S15A                                  | NM_170669.2      |
| 41 | Gene Arl6ip1  | Arl6ip, ARMER ADP-ribosylation factor-like 6 interacting protein 1    | NM_019419.2      |
| 29 | Gene Smg1     | mKIAA0421, C SMG1 homolog, phosphatidylinositol 3-kinase-relate       | NM_001031814.1   |
| 29 | Gene 4930583  | 4930583K01Ri RIKEN cDNA 4930583K01 gene                               | NR_027879.1      |
| 25 | Gene Syt17    | Syt17, Bk synaptotagmin XVII                                          | NM_138649.1      |
| 24 | Gene Itpripl2 | Itpripl2, C1300 inositol 1,4,5-triphosphate receptor interacting prot | NM_001033380.3   |
| 25 | Gene Gde1     | Mir16, Gde1, F glycerophosphodiester phosphodiesterase 1              | NM_019580.4      |
| 25 | Gene Ccp110   | 6330503K22Ri centriolar coiled coil protein 110                       | NM_182995.1      |
| 30 | Gene Knop1    | 2310008H09Ri lysine rich nucleolar protein 1                          | NM_023197.3, NM  |
| 30 | Gene Iqck     | Iqck, A230094 IQ motif containing K                                   | NM_001081446.1   |
| 27 | Gene Gprc5b   | Gprc5b, AW12 G protein-coupled receptor, family C, group 5, mem       | NM_022420.2, NM  |
| 22 | Gene Dcun1d3  | 1700020A13Ri DCN1, defective in cullin neddylation 1, domain con      | NM_173408.3, NM  |
| 22 | Gene Lym1     | 1110065L10Ri Lyr motif containing 1                                   | NM_029610.2      |
| 23 | Gene Uqcrc2   | Uqcrc2, 15000 ubiquinol cytochrome c reductase core protein 2         | NM_025899.2      |
| 17 | Gene Gm5737   | Gm5737, EG43 predicted gene 5737                                      | XM_003086636.1,  |
| 27 | Gene Eef2k    | Eef2k, eEF-2K, eukaryotic elongation factor-2 kinase                  | NM_001267710.1,  |
| 35 | Gene Polr3e   | Sin, RPC5, Polr polymerase (RNA) III (DNA directed) polypeptide E     | NM_025298.3, NM  |
| 21 | Gene Cdr2     | MGC144811, C cerebellar degeneration-related 2                        | NM_007672.2      |
| 21 | Gene 4933427  | 4933427G17Ri RIKEN cDNA 4933427G17 gene                               | NM_028955.1      |
| 26 | Gene Mettl9   | MNCb-5680, O methyltransferase like 9                                 | NM_021554.2      |
| 36 | Gene Usp31    | 6330567E21Ri ubiquitin specific peptidase 31                          | NM_001033173.1   |
| 45 | Gene Cog7     | Cog7, 563040C component of oligomeric golgi complex 7                 | NM_001033318.3   |
| 45 | Gene Gga2     | 1200007E24Ri golgi associated, gamma adaptin ear containing, ARI      | NM_028758.2      |
| 33 | Gene Ears2    | mKIAA1970, A glutamyl-tRNA synthetase 2 (mitochondrial)(putativ       | NM_026140.2      |
| 33 | Gene Ubfd1    | D7Wsu128e, U ubiquitin family domain containing 1                     | NM_138589.2      |
| 29 | Gene Palb2    | Palb2, 473242 partner and localizer of BRCA2                          | NM_001081238.1   |
| 29 | Gene Dctn5    | Dctn5, C78178 dynactin 5                                              | NM_021608.3      |

|    |              |                                                                        |                  |
|----|--------------|------------------------------------------------------------------------|------------------|
| 18 | Gene Plk1    | Plk, Plk1, STPK13                                                      | NM_011121.3      |
| 19 | Gene Prkcb   | Pkcb, A130082 protein kinase C, beta                                   | NM_008855.2      |
| 29 | Gene 4930413 | 4930413G21Ri RIKEN cDNA 4930413G21 gene                                | NR_045614.1      |
| 29 | Gene Rbbp6   | P2P-R, BB2336 retinoblastoma binding protein 6                         | NM_011247.2, NM  |
| 33 | Gene Tnrc6a  | Tnrc6, CAGH2 trinucleotide repeat containing 6a                        | NM_144925.3      |
| 27 | Gene Gtf3c1  | Gtf3c1                                                                 | NM_207239.1      |
| 27 | Gene D430042 | D430042O09R RIKEN cDNA D430042O09 gene                                 | NM_001081022.1   |
| 24 | Gene Gsg1l   | Gsg1l, A185243 GSG1-like                                               | NM_001101488.1   |
| 33 | Gene Xpo6    | AL022631, mK exportin 6                                                | NM_028816.2      |
| 24 | Gene Sbk1    | Sbk1, Sbk SH3-binding kinase 1                                         | NM_145587.2      |
| 25 | Gene Rabep2  | Rabep2, Fra, Mrabaptin, RAB GTPase binding effector protein 2          | NM_030566.2      |
| 17 | Gene Tufm    | EFTU, C76308, Tu translation elongation factor, mitochondrial          | NM_172745.3, NM  |
| 27 | Gene Atxn2l  | A2lp, Atxn2l, Aataxin 2-like                                           | NM_183020.1      |
| 19 | Gene Eif3c   | Eif3c, 3230401 eukaryotic translation initiation factor 3, subunit C   | NM_146200.1      |
| 19 | Gene Cln3    | A1323623, Cln3 ceroid lipofuscinosis, neuronal 3, juvenile (Batten, S) | NM_009907.3, NM  |
| 21 | Gene Slx1b   | A1853643, 111 SLX1 structure-specific endonuclease subunit homolog     | NM_029420.4, NR  |
| 21 | Gene Bola2   | 1110025L05Ril bola-like 2 (E. coli)                                    | NM_175103.3      |
| 21 | Gene Coro1a  | TACO, Clabp, C coronin, actin binding protein 1A                       | NM_009898.2      |
| 21 | Gene Mapk3   | Ert2, Erk1, Esr1 mitogen-activated protein kinase 3                    | NM_011952.2      |
| 24 | Gene Gdpd3   | 1110015E22Ri glycerophosphodiester phosphodiesterase domain c          | NM_024228.2      |
| 24 | Gene Ypel3   | Ypel3, 061004: yippee-like 3 (Drosophila)                              | NM_026875.2, NM  |
| 24 | Gene Tbx6    | Tbx6, rv T-box 6                                                       | NM_011538.2      |
| 31 | Gene Ppp4c   | Ppp4c, AU016 protein phosphatase 4, catalytic subunit                  | NM_019674.3      |
| 31 | Gene Aldoa   | Aldo-1, Aldoa, aldolase A, fructose-bisphosphate                       | NM_001177307.1   |
| 25 | Gene Kctd13  | Pdip1, AV2595 potassium channel tetramerisation domain containi        | NM_172747.2      |
| 24 | Gene Asphd1  | Gm168, A8300 aspartate beta-hydroxylase domain containing 1            | NM_001039645.1   |
| 24 | Gene Sez6l2  | MGC90604, Se seizure related 6 homolog like 2                          | NM_001252566.1   |
| 20 | Gene D830042 | D830044I16Ril RIKEN cDNA D830044I16 gene                               | XR_168437.1, XR_ |
| 20 | Gene Cdipt   | Pis1, Cdipt, Pis CDP-diacylglycerol--inositol 3-phosphatidyltransfera  | NM_026638.3      |
| 46 | Gene Mvp     | Mvp, LRP, 231 major vault protein                                      | NM_080638.3      |
| 46 | Gene Pagr1a  | Pagr1a, 29000 PAXIP1 associated glutamate rich protein 1A              | NM_030240.1      |
| 46 | Gene Prrt2   | DSPB3, Prrt2, proline-rich transmembrane protein 2                     | NM_001102563.1   |
| 46 | Gene Maz     | SAF-1, PUR1, MYC-associated zinc finger protein (purine-binding t      | NM_010772.1      |
| 46 | Gene Kif22   | Kid, AU021460 kinesin family member 22                                 | NM_145588.1      |
| 37 | Gene Zg16    | 1810010M01R zymogen granule protein 16                                 | NM_026918.2      |
| 22 | Gene Tbc1d10 | Tbc1d10b, 111 TBC1 domain family, member 10b                           | NM_144522.5      |
| 22 | Gene Mylpf   | 2410014J02Ril myosin light chain, phosphorylatable, fast skeletal m    | NM_016754.5      |
| 22 | Gene Sept1   | Pnutl3, Sept1, septin 1                                                | NM_017461.2      |
| 38 | Gene Gm4532  | Gm4532, 1000 predicted gene 4532                                       | NR_030674.1      |
| 38 | Gene Zfp553  | ENSMUSG000 zinc finger protein 553                                     | NM_146201.1      |
| 24 | Gene Zfp771  | G630024C07Ril zinc finger protein 771                                  | NM_177362.3      |
| 27 | Gene Sephs2  | Sephs2, Ysg3, selenophosphate synthetase 2                             | NM_009266.3      |
| 28 | Gene Itgal   | Cd11a, LFA-1, integrin alpha L                                         | NM_001253872.1   |
| 28 | Gene Zfp768  | BC026432, Zfp zinc finger protein 768                                  | NM_146202.1      |
| 33 | Gene Zfp689  | Zfp689, 49334 zinc finger protein 689                                  | NM_175163.3      |
| 21 | Gene Prr14   | BC006909, MC proline rich 14                                           | NM_145589.2      |
| 32 | Gene 1700008 | 1700008J07Ril RIKEN cDNA 1700008J07 gene                               | NR_024331.1      |

|    |              |                                                                     |                  |
|----|--------------|---------------------------------------------------------------------|------------------|
| 32 | Gene Srcap   | D030022P06Ri Snf2-related CREBBP activator protein                  | XM_003086644.1,  |
| 19 | Gene Rnf40   | Rnf40, MGC19 ring finger protein 40                                 | NM_172281.2      |
| 25 | Gene 1700120 | 1700120K04Ri RIKEN cDNA 1700120K04 gene                             | NR_027915.1      |
| 25 | Gene Zfp629  | 9330199A09Ri zinc finger protein 629                                | NM_177226.5      |
| 27 | Gene Bcl7c   | C230096E12Ri B cell CLL/lymphoma 7C                                 | NM_009746.2      |
| 27 | Gene Mir762  | mmu-mir-762, microRNA 762                                           | NR_030428.1      |
| 27 | Gene Ctf1    | CT-1, Ctf1 cardiotrophin 1                                          | NM_007795.1      |
| 27 | Gene Ctf2    | NP, Gm494, Ct cardiotrophin 2                                       | NM_198858.1      |
| 28 | Gene Fbxl19  | Fbl19, BC0598 F-box and leucine-rich repeat protein 19              | NM_172748.2      |
| 28 | Gene Orai3   | 9930124N15, (ORAI calcium release-activated calcium modulator 3     | NM_198424.3      |
| 28 | Gene Setd1a  | Nscn1, MGC5 SET domain containing 1A                                | NM_178029.3      |
| 31 | Gene Stx4a   | Syn4, Stx4a, St syntaxin 4A (placental)                             | NM_009294.3      |
| 30 | Gene Zfp668  | BC030314, E1 zinc finger protein 668                                | NM_146259.3      |
| 30 | Gene Zfp646  | Zfp646, 68204 zinc finger protein 646                               | NM_172749.4      |
| 30 | Gene Prss53  | BC039632, FLJ protease, serine, 53                                  | NM_001081268.1   |
| 20 | Gene Prss36  | Prss36, C3300 protease, serine, 36                                  | NM_001081374.1   |
| 26 | Gene BC01715 | BC017158, MG cDNA sequence BC017158                                 | NM_145590.2      |
| 26 | Gene Mir3103 | Mir3103, mmu microRNA 3103                                          | NR_037290.1      |
| 21 | Gene Rgs10   | 2310010N19Ri regulator of G-protein signalling 10                   | NM_026418.2      |
| 29 | Gene Bag3    | Bis, mg638, AA BCL2-associated athanogene 3                         | NM_013863.5      |
| 35 | Gene Mcmbp   | Mcmbp, BC02 MCM (minichromosome maintenance deficient) bin          | NM_145955.3      |
| 35 | Gene Sec23ip | p125, D7Ert3 Sec23 interacting protein                              | NM_001029982.2   |
| 27 | Gene Fgfr2   | KGFRTr, KGFR, fibroblast growth factor receptor 2                   | NM_010207.2, NM  |
| 35 | Gene Ate1    | Ate1, AI22579 arginyltransferase 1                                  | NM_013799.2, NM  |
| 29 | Gene Nsmce4  | Nsmce4a, 241 non-SMC element 4 homolog A (S. cerevisiae)            | NM_001162855.1   |
| 23 | Gene Tacc2   | KIAA4180, mKl transforming, acidic coiled-coil containing protein 2 | NM_001004468.2   |
| 23 | Gene Gm5602  | EG434249, Grr predicted gene 5602                                   | XR_105170.2, XR_ |
| 23 | Gene Plekha1 | Plekha1, TAPP pleckstrin homology domain containing, family A (pl   | NM_133942.2      |
| 25 | Gene Htra1   | AI429470, RSP HtrA serine peptidase 1                               | NM_019564.3      |
| 26 | Gene 2310057 | AI429544, 311 RIKEN cDNA 2310057M21 gene                            | NM_026655.3      |
| 26 | Gene Pstk    | Pstk, R75284, phosphoseryl-tRNA kinase                              | NM_001039534.1   |
| 28 | Gene Ikzf5   | Ikzf5, PEGASU IKAROS family zinc finger 5                           | NM_175115.4      |
| 28 | Gene Acadsb  | Acadsb, 13000 acyl-Coenzyme A dehydrogenase, short/branched cl      | NM_025826.4      |
| 21 | Gene Hmx2    | Hmx2, Nkx-5.2 H6 homeobox 2                                         | NM_145998.3      |
| 21 | Gene Bub3    | AU043350, Bu budding uninhibited by benzimidazoles 3 homolog (:     | NM_009774.3      |
| 23 | Gene Gpr26   | 9630036A11Ri G protein-coupled receptor 26                          | NM_173410.3      |
| 23 | Gene Chst15  | GalNAcS-6ST, carbohydrate (N-acetylgalactosamine 4-sulfate 6-O)     | NM_029935.5      |
| 23 | Gene Gm1946  | Gm19463 predicted gene, 19463                                       | XR_140846.1, XR_ |
| 23 | Gene Gm1058  | ENSMUSG000 predicted gene 10584                                     | NR_028578.1      |
| 30 | Gene Fam53b  | Fam53b, mKIA family with sequence similarity 53, member B           | NM_212473.1, NM  |
| 27 | Gene 1500002 | ENSMUSG000 RIKEN cDNA 1500002F19 gene                               | XR_140847.2, XR_ |
| 30 | Gene Ctbp2   | Ctbp2, Ribeye, C-terminal binding protein 2                         | NM_009980.4, NM  |
| 30 | Gene 4930483 | 4930483O08Ri RIKEN cDNA 4930483O08 gene                             | NR_046279.1      |
| 24 | Gene 2700050 | MGC27934, 27 RIKEN cDNA 2700050L05 gene                             | NM_178115.4      |
| 22 | Gene Uros    | AI415298, Uro uroporphyrinogen III synthase                         | NM_009479.2      |
| 22 | Gene Bccip   | 1110013J05Ri BRCA2 and CDKN1A interacting protein                   | NM_025392.2      |
| 29 | Gene Dhx32   | 3110079L04Ri DEAH (Asp-Glu-Ala-His) box polypeptide 32              | NM_133941.2      |

|    |               |                                                                            |                 |
|----|---------------|----------------------------------------------------------------------------|-----------------|
| 29 | Gene Fank1    | Fank1, 170000 fibronectin type 3 and ankyrin repeat domains 1              | NM_025850.2     |
| 25 | Gene Dock1    | 9130006G06Ri dedicator of cytokinesis 1                                    | NM_001033420.2  |
| 20 | Gene Clrn3    | Clrn3, MGC376 clarin 3                                                     | NM_178669.5     |
| 22 | Gene Ptpre    | PTPe, Ptpre, P <sup>+</sup> protein tyrosine phosphatase, receptor type, E | NM_011212.3     |
| 39 | Gene Mki67    | Ki-67, Mki67, T antigen identified by monoclonal antibody Ki 67            | NM_001081117.2  |
| 17 | Gene Ebf3     | 3110018A08Ri early B cell factor 3                                         | NM_010096.3, NM |
| 20 | Gene Glrx3    | Txn12, Glrx3, P glutaredoxin 3                                             | NM_023140.4     |
| 26 | Gene Mapk1i   | AU043776, 23: mitogen-activated protein kinase 1 interacting prote         | NM_001045483.1, |
| 26 | Gene Ppp2r2d  | D7ErtD753e, 1 protein phosphatase 2, regulatory subunit B, delta is        | NM_026391.2     |
| 25 | Gene Jakmip3  | Jakmip3, AI593 janus kinase and microtubule interacting protein 3          | NM_028708.1     |
| 25 | Gene Dpysl4   | Crmp3, Dpysl4 dihydropyrimidinase-like 4                                   | NM_011993.4     |
| 25 | Gene Lrrc27   | 1700071K18Ri leucine rich repeat containing 27                             | NM_027164.1, NM |
| 25 | Gene Pwwp2b   | D7ErtD517e, P PWWP domain containing 2B                                    | NM_001033206.2, |
| 21 | Gene Inpp5a   | Inpp5a inositol polyphosphate-5-phosphatase A                              | NM_183144.3, NM |
| 21 | Gene Nkx6-2   | Nkx6.2, Gtx, N NK6 homeobox 2                                              | NM_183248.3, NR |
| 23 | Gene Kndc1    | very-kind, KIAA kinase non-catalytic C-lobe domain (KIND) containin        | NM_177261.4     |
| 23 | Gene Utf1     | AI505934, Utf1 undifferentiated embryonic cell transcription factor        | NM_009482.2     |
| 29 | Gene Tubgcp2  | 1700022B05Ri tubulin, gamma complex associated protein 2                   | NM_133755.2     |
| 29 | Gene Zfp511   | C86579, Zfp511 zinc finger protein 511                                     | NM_027201.1     |
| 29 | Gene Msx3     | Msx3, AI32337 homeobox, msh-like 3                                         | NM_010836.3     |
| 21 | Gene Paox     | Paox, Pao, 241 polyamine oxidase (exo-N4-amino)                            | NM_153783.4     |
| 21 | Gene Mtg1     | MGC28365, M mitochondrial GTPase 1 homolog (S. cerevisiae)                 | NM_199301.2     |
| 36 | Gene C330022  | C330022C24Ri RIKEN cDNA C330022C24 gene                                    | NR_045717.1     |
| 36 | Gene Scgb1c1  | Ryd5, Scgb1c1 secretoglobin, family 1C, member 1                           | NM_001099742.1  |
| 36 | Gene Odf3     | Odf3, 1700011 outer dense fiber of sperm tails 3                           | NM_027019.3     |
| 36 | Gene Bet1l    | Gs15, 2610021 blocked early in transport 1 homolog (S. cerevisiae)-        | NM_018742.5     |
| 36 | Gene Ric8     | Ric8, Ric8a, RIK resistance to inhibitors of cholinesterase 8 homolog      | NM_053194.4     |
| 36 | Gene Sirt3    | Sirt3, 2310003 sirtuin 3 (silent mating type information regulation 2      | NM_022433.2, NM |
| 25 | Gene Psm13    | Psm13, S11 proteasome (prosome, macropain) 26S subunit, non                | NM_011875.4     |
| 24 | Gene Hras1    | Harvey-ras, ras Harvey rat sarcoma virus oncogene 1                        | NM_001130443.1  |
| 30 | Gene Lrrc56   | Lrrc56, 573042 leucine rich repeat containing 56                           | NM_001172064.1  |
| 30 | Gene 1600016  | 1600016N20Ri RIKEN cDNA 1600016N20 gene                                    | NM_028050.2     |
| 30 | Gene Rassf7   | Rassf7, AW210 Ras association (RalGDS/AF-6) domain family (N-term          | NM_025886.3     |
| 30 | Gene Mir210   | mmu-mir-210, microRNA 210                                                  | NR_029793.1     |
| 24 | Gene Cend1    | AI415214, BM1 cell cycle exit and neuronal differentiation 1               | NM_021316.4     |
| 38 | Gene Slc25a22 | Gc1, Slc25a22, solute carrier family 25 (mitochondrial carrier, gluta      | NM_001177576.1, |
| 38 | Gene Lrdd     | Lrdd, AU04244 leucine-rich and death domain containing                     | NM_022654.1     |
| 38 | Gene Rplp2    | 2700049I22Ri ribosomal protein, large P2                                   | NM_026020.6     |
| 38 | Gene Snora52  | MBI-20, Snora: small nucleolar RNA, H/ACA box 52                           | NR_034049.2     |
| 38 | Gene Pnpla2   | TTS-2.2, Pnpla: patatin-like phospholipase domain containing 2             | NM_001163689.1  |
| 44 | Gene Efcab4a  | Efcab4a, 6330 EF-hand calcium binding domain 4A                            | NM_001025103.2  |
| 44 | Gene Cd151    | PETA-3, SFA-1, CD151 antigen                                               | NM_009842.3, NM |
| 44 | Gene Polr2l   | 2510029B14Ri polymerase (RNA) II (DNA directed) polypeptide L              | NM_025593.1     |
| 44 | Gene Tspan4   | D130042I01Ri tetraspanin 4                                                 | NM_001252588.1, |
| 16 | Gene Ap2a2    | AF006990, AW adaptor-related protein complex 2, alpha 2 subunit            | NM_007459.3     |
| 19 | Gene Dusp8    | Nt1p1, AI5934 dual specificity phosphatase 8                               | NM_008748.3     |
| 24 | Gene Gm4559   | Gm4559 predicted gene 4559                                                 | NM_001199309.1  |



|    |              |                                                                      |                  |
|----|--------------|----------------------------------------------------------------------|------------------|
| 24 | Gene E330027 | E330027M22R RIKEN cDNA gene, E330027M22Rik                           | XR_140867.1, XR_ |
| 30 | Gene Ctsd    | CD, Ctsd, CatD cathepsin D                                           | NM_009983.2      |
| 30 | Gene Mrpl23  | L23mrp, Rpl23 mitochondrial ribosomal protein L23                    | NM_011288.1      |
| 16 | Gene Igf2    | Igf-II, Igf-2, M6 insulin-like growth factor 2                       | NM_010514.3, NM  |
| 16 | Gene Mir483  | mir-483, Mirn4 microRNA 483                                          | NR_030251.1      |
| 16 | Gene Igf2as  | Igf2as, Peg8 insulin-like growth factor 2, antisense                 | NR_002855.2      |
| 22 | Gene Ascl2   | Ascl2, 241008: achaete-scute complex homolog 2 (Drosophila)          | NM_008554.3      |
| 36 | Gene R74862  | R74862 expressed sequence R74862                                     | NR_015529.1      |
| 36 | Gene Cd81    | Tapa1, Tapa-1, CD81 antigen                                          | NM_133655.2      |
| 33 | Gene Cdkn1c  | p57Kip2, Cdkn cyclin-dependent kinase inhibitor 1C (P57)             | NM_009876.4, NM  |
| 27 | Gene Nap1l4  | Nap1l4, D7Wsi nucleosome assembly protein 1-like 4                   | NM_008672.2      |
| 27 | Gene Cars    | Cars, CA3 cysteinyl-tRNA synthetase                                  | NM_001252593.1   |
| 25 | Gene Ctnn    | Ctnn, 1110020i cortactin                                             | NM_001252572.1   |
| 25 | Gene Ppfia1  | C030014K08Ri protein tyrosine phosphatase, receptor type, f polyp    | NM_001195086.1   |
| 19 | Gene Fgf3    | Int-P, Fgf-3, Int fibroblast growth factor 3                         | NM_008007.2      |
| 21 | Gene Ccnd1   | AI327039, Cyl- cyclin D1                                             | NM_007631.2      |
| 21 | Gene 1810010 | Gm2572, 1810 RIKEN cDNA 1810010D01 gene                              | NR_033626.1      |
| 16 | Gene A430078 | A430078G23R RIKEN cDNA A430078G23 gene                               | NM_001033378.3   |
| 16 | Gene Arhgef1 | AI467246, D03 rho/rac guanine nucleotide exchange factor (GEF) 1     | NM_133962.3      |
| 19 | Gene 1700019 | 1700019B03Ri RIKEN cDNA 1700019B03 gene                              | NM_029598.1      |
| 19 | Gene Zfp358  | Zfend, Zfp358 zinc finger protein 358                                | NM_080461.2      |
| 19 | Gene Mcoln1  | MGC7172, TRF mucolipin 1                                             | NM_053177.1      |
| 18 | Gene C330021 | C330021F23Ri RIKEN cDNA C330021F23 gene                              | NM_001024728.2   |
| 18 | Gene Gm1018  | ENSMUSG000i ribosomal protein S23 pseudogene                         |                  |
| 18 | Gene Camsap  | Kiaa1543, 231i calmodulin regulated spectrin-associated protein fa   | NM_001163749.1   |
| 18 | Gene 1810033 | Mcomp1, 1810033B17Rik                                                | NM_026985.1      |
| 18 | Gene BB09427 | 664858, BB094 expressed sequence BB094273                            | XR_168441.1, XR_ |
| 18 | Gene Trappc5 | TRS31, Trappc: trafficking protein particle complex 5                | NM_025701.4      |
| 18 | Gene Fcer2a  | Fce2, Fcer2, Cf Fc receptor, IgE, low affinity II, alpha polypeptide | NM_013517.4, NM  |
| 31 | Gene Gm1437  | Gm14378, OTI predicted gene 14378                                    | NM_001195258.1   |
| 31 | Gene Snapc2  | AU015675, Sn: small nuclear RNA activating complex, polypeptide 2    | NM_133968.1      |
| 31 | Gene Ctxn1   | BC028881, Ctx cortexin 1                                             | NM_183315.2      |
| 31 | Gene Timm44  | MGC118030, C translocase of inner mitochondrial membrane 44          | NM_011592.2      |
| 31 | Gene Elavl1  | Hua, HUR, Elav ELAV (embryonic lethal, abnormal vision)-like 1 (Hu   | NM_010485.3      |
| 31 | Gene Ccl25   | Scya25, TECK, i chemokine (C-C motif) ligand 25                      | NM_009138.3, NR  |
| 26 | Gene Gm7461  | EG665044, Gr predicted gene 7461                                     | XR_168442.1, XR_ |
| 28 | Gene Shcbp1  | Shcbp1, mPAL Shc SH2-domain binding protein 1                        | NM_011369.2      |
| 26 | Gene Efnb2   | Epl5, Htk-L, NL ephrin B2                                            | NM_010111.5      |
| 26 | Gene 4921522 | 4921522P10Ri RIKEN cDNA 4921522P10 gene                              | XR_107972.1, XR_ |
| 26 | Gene Arglu1  | C130008N12, i arginine and glutamate rich 1                          | NM_176849.3      |
| 37 | Gene Irs2    | Irs-2, Irs2 insulin receptor substrate 2                             | NM_001081212.1   |
| 37 | Gene 9530052 | 9530052E02Ri RIKEN cDNA 9530052E02 gene                              | NR_046017.1      |
| 39 | Gene Col4a1  | Col4a-1, Del(8) collagen, type IV, alpha 1                           | NM_009931.2      |
| 39 | Gene Col4a2  | canstatin, Col4 collagen, type IV, alpha 2                           | NM_009932.3      |
| 27 | Gene Rab20   | MGC107554, FRAB20, member RAS oncogene family                        | NM_011227.1      |
| 27 | Gene E230013 | E230013L22Ril RIKEN cDNA E230013L22 gene                             | XR_105187.2, XR_ |
| 40 | Gene Carkd   | 0710008K08Ri carbohydrate kinase domain containing                   | NM_001190357.1   |

|    |               |              |                                                            |                  |
|----|---------------|--------------|------------------------------------------------------------|------------------|
| 45 | Gene Cars2    | 2310051N18Ri | cysteinyl-tRNA synthetase 2 (mitochondrial)(putativ        | NM_024248.1      |
| 45 | Gene Ing1     | AI875420,    | p37 inhibitor of growth family, member 1                   | NM_011919.4      |
| 43 | Gene Ankrd10  | AW549277,    | Ar ankyrin repeat domain 10                                | NM_133971.2, NM  |
| 38 | Gene Arhgef7  | Cool,        | betaPix-k Rho guanine nucleotide exchange factor (GEF7)    | NM_017402.4, NM  |
| 31 | Gene Tubgcp3  | Tubgcp3,     | Spc9 tubulin, gamma complex associated protein 3           | NM_198031.1      |
| 21 | Gene Atp11a   | 4930558F19Ri | ATPase, class VI, type 11A                                 | NM_015804.3      |
| 24 | Gene Mcf2l    | C130040G20Ri | mcf.2 transforming sequence-like                           | NM_178076.3, NM  |
| 36 | Gene Pcid2    | Pcid2,       | A73004: PCI domain containing 2                            | NM_178708.3      |
| 36 | Gene Cul4a    | MGC36573,    | 28cullin 4A                                                | NM_146207.2      |
| 26 | Gene Lamp1    | Lamp-1,      | AI196 lysosomal-associated membrane protein 1              | NM_010684.2      |
| 24 | Gene Tfdp1    | Tfdp1,       | Dp1, Dr transcription factor Dp 1                          | NM_009361.2      |
| 28 | Gene Gas6     | Gas-6,       | Gas6 growth arrest specific 6                              | NM_019521.2      |
| 25 | Gene Rasa3    | E130011G04,  | (RAS p21 protein activator 3                               | NM_009025.2      |
| 29 | Gene Cdc16    | 2700071J12Ri | CDC16 cell division cycle 16                               | NM_027276.2      |
| 25 | Gene Upf3a    | 2600001C03Ri | UPF3 regulator of nonsense transcripts homolog A (         | NM_025924.2      |
| 26 | Gene Zfp828   | Znf828,      | Chamz zinc finger protein 828                              | NM_181854.2      |
| 26 | Gene Coprs    | AI256813,    | 170 coordinator of PRMT5, differentiation stimulator       | NM_025556.3      |
| 27 | Gene 2610019  | 2610019F03Ri | RIKEN cDNA 2610019F03 gene                                 | NM_173744.4      |
| 21 | Gene Arhgef10 | 6430549H08Ri | Rho guanine nucleotide exchange factor (GEF) 10            | NM_001037736.1,  |
| 28 | Gene Kbtbd11  | 2900016B01Ri | kelch repeat and BTB (POZ) domain containing 11            | NM_029116.2      |
| 34 | Gene Mcph1    | BRIT1,       | MGC66 microcephaly, primary autosomal recessive 1          | NM_173189.2      |
| 38 | Gene Agpat5   | Agpat5,      | 11100 1-acylglycerol-3-phosphate O-acyltransferase 5 (lysc | NM_026792.3      |
| 25 | Gene Xkr5     | 5430438H03Ri | X Kell blood group precursor-related family, membe         | NM_176951.4, NM  |
| 31 | Gene Atp7b    | tx,          | Atp7b, Atp7 ATPase, Cu++ transporting, beta polypeptide    | NM_007511.2      |
| 31 | Gene Alg11    | AI849156,    | AW: asparagine-linked glycosylation 11 (alpha-1,2-mann     | NM_001243161.1   |
| 26 | Gene Ckap2    | AW228814,    | AI: cytoskeleton associated protein 2                      | NM_001004140.2   |
| 26 | Gene Vps36    | 2210415M20R  | vacuolar protein sorting 36 (yeast)                        | NM_027338.1      |
| 19 | Gene Smim19   | AI316807,    | BG6 small integral membrane protein 19                     | NM_001012667.2,  |
| 19 | Gene Slc20a2  | Pit2,        | Ram1, Pit solute carrier family 20, member 2               | NM_011394.3      |
| 19 | Gene Gm1749   | Gm17491      | predicted gene, 17491                                      | XR_105200.2, XR_ |
| 27 | Gene Vdac3    | Vdac3,       | MGC10 voltage-dependent anion channel 3                    | NM_011696.2, NM  |
| 19 | Gene Ap3m2    | AP-3B,       | 583044 adaptor-related protein complex 3, mu 2 subunit     | NM_029505.3, NM  |
| 35 | Gene Kat6a    | Myst3,       | KAT6A, K(lysine) acetyltransferase 6A                      | NM_001081149.1   |
| 20 | Gene Ank1     | Ank-1,       | Ank1, p ankyrin 1, erythroid                               | NM_031158.2, NM  |
| 20 | Gene Mir486   | Mir486,      | Mir4 microRNA 486                                          | NR_030254.1      |
| 20 | Gene Mir3107  | mmu-mir-3107 | microRNA 3107                                              | NR_037293.1      |
| 20 | Gene Nkx6-3   | Nkx6.3,      | Nkx6-3 NK6 homeobox 3                                      | NM_029002.2      |
| 20 | Gene Agpat6   | AU041707,    | Ag 1-acylglycerol-3-phosphate O-acyltransferase 6 (lysc    | NM_018743.4      |
| 24 | Gene Sfrp1    | AW742929,    | sF secreted frizzled-related protein 1                     | NM_013834.3      |
| 29 | Gene Adam9    | MDC9,        | mKIAA(a disintegrin and metallopeptidase domain 9 (meltri  | NM_007404.2, NM  |
| 29 | Gene Tm2d2    | Blp1,        | Tm2d2, 2 TM2 domain containing 2                           | NM_027194.3      |
| 29 | Gene Htra4    | Htra4,       | B43020 HtrA serine peptidase 4                             | NM_001081187.3   |
| 36 | Gene Tacc1    | B230378H13Ri | transforming, acidic coiled-coil containing protein 1      | NM_199323.2, NM  |
| 34 | Gene Fgfr1    | Hspy,        | Flt-2, Fgl fibroblast growth factor receptor 1             | NM_001079909.1   |
| 26 | Gene Letm2    | 6030453H13,  | Ileucine zipper-EF-hand containing transmembrane r         | NM_173012.3      |
| 26 | Gene Whsc1l1  | Whsc1l1,     | 6720 Wolf-Hirschhorn syndrome candidate 1-like 1 (hum      | NM_001001735.1,  |
| 24 | Gene Ddhd2    | SAMWD1,      | mKIDHD domain containing 2                                 | NM_028102.1      |

|    |                   |                |                                                        |                  |
|----|-------------------|----------------|--------------------------------------------------------|------------------|
| 24 | Gene Gm1748       | Gm17484        | predicted gene, 17484                                  | XR_105203.2, XR_ |
| 36 | Gene Bag4         | SODD, Bag4, 2. | BCL2-associated athanogene 4                           | NM_026121.3      |
| 36 | Gene Lsm1         | 2810025O06Ri   | LSM1 homolog, U6 small nuclear RNA associated (S.      | NM_026032.1      |
| 25 | Gene Hgsnat       | AW208455, Tn   | heparan-alpha-glucosaminide N-acetyltransferase        | NM_029884.1      |
| 25 | Gene 4930444      | 4930444A02Rik, | Sgk196                                                 | NM_029037.4      |
| 26 | Gene Hook3        | Hook3, AI3171  | hook homolog 3 (Drosophila)                            | NM_207659.3      |
| 26 | Gene Rnf170       | Rnf170, 67204  | ring finger protein 170                                | NM_029965.2      |
| 42 | Gene Zfp703       | AI430822, Zep  | zinc finger protein 703                                | NM_001101502.1   |
| 28 | Gene Erlin2       | Erlin2, BC0363 | ER lipid raft associated 2                             | NM_153592.2      |
| 23 | Gene Gpr124       | Tem5, 953007.  | G protein-coupled receptor 124                         | NM_054044.2      |
| 22 | Gene Brf2         | 5730512K07Ri   | BRF2, subunit of RNA polymerase III transcription in   | NM_025686.2      |
| 25 | Gene Rab11fip1    | Rab11fip1, Rcç | RAB11 family interacting protein 1 (class I)           | NM_001080813.2   |
| 25 | Gene LOC101055849 |                | uncharacterized LOC101055849                           | XM_003945436.1   |
| 29 | Gene Eif4ebp1     | Eif4ebp1, PHA: | eukaryotic translation initiation factor 4E binding pr | NM_007918.3      |
| 24 | Gene Mir1186      | Mir1186, mmu   | microRNA 1186                                          | NR_035414.1      |
| 24 | Gene Rnf122       | Rnf122, 11100  | ring finger protein 122                                | NM_175136.2      |
| 29 | Gene Tti2         | BC019943, Tti: | TELO2 interacting protein 2                            | NM_144927.3, NM  |
| 29 | Gene Mak16        | Mak16, 26000   | MAK16 homolog (S. cerevisiae)                          | NM_026453.3      |
| 17 | Gene LOC101055986 |                | uncharacterized LOC101055986                           | XM_003945437.1   |
| 17 | Gene Gm3985       | Gm3985         | predicted gene 3985                                    | NM_001177589.1   |
| 19 | Gene Wrn          | Wrn, AI84614ç  | Werner syndrome homolog (human)                        | NM_011721.4, NM  |
| 19 | Gene Purg         | Purg, 4930486  | purine-rich element binding protein G                  | NM_152821.2, NM  |
| 28 | Gene Ppp2cb       | AI115466, Ppp  | protein phosphatase 2 (formerly 2A), catalytic subur   | NM_017374.3      |
| 30 | Gene 1700104      | 1700104B16Ri   | RIKEN cDNA 1700104B16 gene                             | XR_140879.1      |
| 30 | Gene Gtf2e2       | Gtf2e2, 34kDa  | general transcription factor II E, polypeptide 2 (beta | NM_026584.3, NM  |
| 30 | Gene Smim18       | AI835723, 270  | small integral membrane protein 18                     | NM_001206849.1   |
| 20 | Gene Rbpms        | Rbpms, 27000   | RNA binding protein gene with multiple splicing        | NM_019733.2, NM  |
| 18 | Gene Leprotl1     | 1110067H13Ri   | leptin receptor overlapping transcript-like 1          | NM_026609.2      |
| 18 | Gene Tmem6ç       | Tmem6ç, SAR:   | transmembrane protein 66                               | NM_026432.3      |
| 27 | Gene Dusp4        | Dusp4, AI8446  | dual specificity phosphatase 4                         | NM_176933.4      |
| 27 | Gene Gm9648       | Gm9648         | predicted gene 9648                                    | XR_168448.1, XR_ |
| 20 | Gene Tnks         | C86528, Tnks,  | tankyrase, TRF1-interacting ankyrin-related ADP-rib    | NM_175091.3      |
| 29 | Gene Eri1         | 3'hexo, Eri1,  | Tlexoribonuclease 1                                    | NM_026067.3      |
| 27 | Gene Gm1679       | Gm16793        | predicted gene, 16793                                  | NR_040376.1      |
| 27 | Gene Mfhas1       | D8Erd91e, Mf   | malignant fibrous histiocytoma amplified sequence      | NM_001081279.1   |
| 25 | Gene Lonrf1       | Lonrf1         | LON peptidase N-terminal domain and ring finger 1      | NM_001081150.1   |
| 34 | Gene Tusc3        | AU022242, Tu:  | tumor suppressor candidate 3                           | NM_030254.3      |
| 22 | Gene Micu3        | 2900075B16Ri   | mitochondrial calcium uptake family, member 3          | NM_030110.1      |
| 26 | Gene Cnot7        | Pop2, AU0227.  | CCR4-NOT transcription complex, subunit 7              | NM_011135.4      |
| 26 | Gene Vps37a       | 4930592A21Ri   | vacuolar protein sorting 37A (yeast)                   | NM_033560.3      |
| 24 | Gene Slc7a2       | AI158848, Atrc | solute carrier family 7 (cationic amino acid transport | NM_007514.3, NM  |
| 25 | Gene Mtus1        | AI481402, MD:  | mitochondrial tumor suppressor 1                       | NM_001005863.2   |
| 28 | Gene Pcm1         | Pcm1, 943007   | pericentriolar material 1                              | NM_023662.3      |
| 23 | Gene Asah1        | 2310081N20Ri   | N-acylsphingosine amidohydrolase 1                     | NM_019734.2      |
| 36 | Gene Gm9908       | ENSMUSG000ç    | predicted gene 9908                                    | XR_168450.1, XR_ |
| 22 | Gene Slc25a4      | AU019225, Slc  | solute carrier family 25 (mitochondrial carrier, aden  | NM_007450.4      |
| 26 | Gene Acsl1        | Acsl1, FACS,   | Acyl-CoA synthetase long-chain family member 1         | NM_007981.3      |

|    |                   |              |                                                            |                  |
|----|-------------------|--------------|------------------------------------------------------------|------------------|
| 33 | Gene Gm1667       | Gm16675      | predicted gene, 16675                                      | NR_045750.1      |
| 33 | Gene Irf2         | 9830146E22Ri | interferon regulatory factor 2                             | NM_008391.4      |
| 30 | Gene Stox2        | AI449080,    | 493 storkhead box 2                                        | NM_001114311.1   |
| 30 | Gene 4930448      | 4930448N21Ri | RIKEN cDNA 4930448N21 gene                                 | XM_003945439.1,  |
| 37 | Gene Ing2         | Ing2b,       | 281001 inhibitor of growth family, member 2                | NM_023503.3      |
| 37 | Gene AA3864       | AA386476     | expressed sequence AA386476                                | XM_003945440.1,  |
| 31 | Gene Cdkn2aij     | AW208986,    | Cc CDKN2A interacting protein                              | NM_172407.3      |
| 26 | Gene Wwc2         | AU022508,    | D8 WW, C2 and coiled-coil domain containing 2              | NM_133791.4      |
| 32 | Gene Dctd         | 6030466N05Ri | dCMP deaminase                                             | NM_178788.4, NM  |
| 26 | Gene Tenm3        | mKIAA1455,   | 2t teneurin transmembrane protein 3                        | NM_011857.3, NM  |
| 23 | Gene 2900073      | 2900073C17Ri | RIKEN cDNA 2900073C17 gene                                 | XM_003945441.1,  |
| 26 | Gene Spcs3        | Spcs3,       | 181001 signal peptidase complex subunit 3 homolog (S. cere | NM_029701.1      |
| 34 | Gene Scrg1        | Scrg1,       | AW124: scrapie responsive gene 1                           | NM_009136.3      |
| 34 | Gene Sap30        | 30kDa,       | Sap30 sin3 associated polypeptide                          | NM_021788.2      |
| 32 | Gene Hmgb2        | Hmgb2,       | HMG- high mobility group box 2                             | NM_008252.3      |
| 32 | Gene Galnt7       | AI225872,    | Gal1 UDP-N-acetyl-alpha-D-galactosamine: polypeptide N     | NM_144731.4, NM  |
| 32 | Gene AW0462       | AW046200     | expressed sequence AW046200                                | NR_040698.1      |
| 31 | Gene Mfap3l       | NYD-sp9,     | mKIA microfibillar-associated protein 3-like               | NM_001177881.1   |
| 26 | Gene Sh3rf1       | Sh3rf1,      | Posh, SSH3 domain containing ring finger 1                 | NM_021506.2      |
| 22 | Gene Cbr4         | MGC6971,     | A7: carbonyl reductase 4                                   | NM_145595.2      |
| 24 | Gene Palld        | Palld,       | 6030492 palladin, cytoskeletal associated protein          | NM_001081390.1   |
| 24 | Gene Tmem19       | 3110005G23Ri | transmembrane protein 192                                  | NM_028427.3, NM  |
| 30 | Gene Naf1         | Naf1,        | Gm174 nuclear assembly factor 1 homolog (S. cerevisiae)    | NM_001163564.1   |
| 22 | Gene Csgalnac     | 4732435N03Ri | chondroitin sulfate N-acetylgalactosaminyltransferase      | NM_001252623.1,  |
| 17 | Gene Lpl          | Lpl          | lipoprotein lipase                                         | NM_008509.2      |
| 18 | Gene Zfp930       | Zfp930,      | D1062 zinc finger protein 930                              | NM_001013379.2   |
| 19 | Gene Zfp964       | 4732490P12,  | E zinc finger protein 964                                  | NM_001177527.1   |
| 38 | Gene Zfp869       | Zfp869,      | 12000 zinc finger protein 869                              | NM_001039965.1   |
| 33 | Gene Atp13a1      | Atp13a1,     | catp, ATPase type 13A1                                     | NM_133224.2      |
| 39 | Gene Yjefn3       | YjeF_N3,     | Gm1 YjeF N-terminal domain containing 3                    | XM_978251.4, XM  |
| 39 | Gene Ndufa13      | CGI-39,      | GRIM- NADH dehydrogenase (ubiquinone) 1 alpha subcom       | NM_023312.2      |
| 39 | Gene Tsk6         | Sstk,        | Tsk6 testis-specific serine kinase 6                       | NM_032004.1      |
| 39 | Gene Gatad2a      | 1110066C11Ri | GATA zinc finger domain containing 2A                      | NM_145596.3, NM  |
| 39 | Gene Mau2         | A930019L04Ri | MAU2 chromatid cohesion factor homolog (C. elega           | NM_028993.4, NM  |
| 39 | Gene Sugp1        | 5730496N02Ri | SURP and G patch domain containing 1                       | NM_027481.2      |
| 27 | Gene Armc6        | AW554412,    | M armadillo repeat containing 6                            | NM_133972.2      |
| 27 | Gene Sugp2        | Sfrs14,      | Sugp2, SURP and G patch domain containing 2                | NM_172755.3, NM  |
| 23 | Gene LOC100503831 |              | uncharacterized LOC100503831                               | XR_108014.1, XR_ |
| 23 | Gene Homer3       | AW146114,    | Hc homer homolog 3 (Drosophila)                            | NM_011984.2, NM  |
| 23 | Gene Ddx49        | Ddx49,       | R2709( DEAD (Asp-Glu-Ala-Asp) box polypeptide 49           | NM_001024922.2   |
| 26 | Gene Cope         | Cope,        | 111000: coatomer protein complex, subunit epsilon          | NM_021538.1      |
| 26 | Gene Cers1        | Uog-1,       | to, Lass1, Cers1, CerS1                                    | NM_138647.3      |
| 26 | Gene Gdf1         | AI385651,    | Gdf: growth differentiation factor 1                       | NM_008107.4, NM  |
| 34 | Gene Upf1         | Rent1,       | PNORF- UPF1 regulator of nonsense transcripts homolog (ye  | NM_030680.2, NM  |
| 20 | Gene Comp         | TSP5,        | Comp cartilage oligomeric matrix protein                   | NM_016685.2      |
| 20 | Gene Crtc1        | Mect1,       | TORC1 CREB regulated transcription coactivator 1           | NM_001004062.2   |
| 33 | Gene Crlf1        | CRLM3,       | NR6.1, cytokine receptor-like factor 1                     | NM_018827.2      |

|    |              |                |                                                         |                  |
|----|--------------|----------------|---------------------------------------------------------|------------------|
| 33 | Gene 2810428 | 2810428I15Rik  | RIKEN cDNA 2810428I15 gene                              | NM_025577.2      |
| 33 | Gene Uba52   | Rps27a, Uba52  | ubiquitin A-52 residue ribosomal protein fusion protein | NM_019883.3      |
| 33 | Gene Kxd1    | Kxd1, 2810422  | KxDL motif containing 1                                 | NM_029366.2      |
| 25 | Gene Fkbp8   | Fkbp8, FKBP-3: | FK506 binding protein 8                                 | NM_010223.2, NM  |
| 31 | Gene Ell     | Ell, Ell1, Men | elongation factor RNA polymerase II                     | NM_007924.2      |
| 31 | Gene Isyna1  | AU018670, 13I  | myo-inositol 1-phosphate synthase A1                    | NM_023627.1      |
| 31 | Gene Ssbp4   | AW743380, Ss   | single stranded DNA binding protein 4                   | NM_133772.2      |
| 28 | Gene Lrrc25  | Lrrc25, Mapa   | leucine rich repeat containing 25                       | NM_153074.3      |
| 24 | Gene Gdf15   | NAG-1, MIC-1,  | growth differentiation factor 15                        | NM_011819.2      |
| 27 | Gene Pgpep1  | PGP, 2810003I  | pyroglutamyl-peptidase I                                | NM_023217.4      |
| 63 | Gene Jun     | MGC6245, Jun   | Jun proto-oncogene related gene d                       | NM_010592.4      |
| 63 | Gene Gm1648  | Gm502, Gm16    | predicted gene 16486                                    | XM_912668.3, XM  |
| 36 | Gene Pde4c   | MGC31320, Pc   | phosphodiesterase 4C, cAMP specific                     | NM_201607.2      |
| 36 | Gene Rab3a   | Rab3a          | RAB3A, member RAS oncogene family                       | NM_001166399.2   |
| 36 | Gene Mpv17l2 | Mpv17l2, MGC   | MPV17 mitochondrial membrane protein-like 2             | NM_183170.2      |
| 36 | Gene Ifi30   | Ifi30, GILT,   | IP3 interferon gamma inducible protein 30               | NM_023065.3      |
| 30 | Gene Pik3r2  | p85beta, Pik3r | phosphatidylinositol 3-kinase, regulatory subunit, p    | NM_008841.2      |
| 30 | Gene 2010320 | 2010320M18R    | RIKEN cDNA 2010320M18 gene                              | NR_029440.1      |
| 30 | Gene Mast3   | mKIAA0561, B   | microtubule associated serine/threonine kinase 3        | NM_199308.2      |
| 24 | Gene Arrdc2  | 4632416I05Rik  | arrestin domain containing 2                            | NM_027560.1      |
| 24 | Gene Kcnn1   | AI854248, SK1  | potassium intermediate/small conductance calcium        | NM_032397.2      |
| 26 | Gene A230052 | A230052G05R    | RIKEN cDNA A230052G05 gene                              | XR_108016.1, XR_ |
| 26 | Gene Ccdc124 | Ccdc124, 1810  | coiled-coil domain containing 124                       | NM_026964.3      |
| 44 | Gene Slc5a5  | Slc5a5, NIS    | solute carrier family 5 (sodium iodide symporter), m    | NM_053248.2      |
| 44 | Gene Rpl18a  | Rpl18a, 25100  | ribosomal protein L18A                                  | NM_029751.4      |
| 44 | Gene Snora68 | MBI-30, Rnu68  | small nucleolar RNA, H/ACA box 68                       | NR_002901.1      |
| 44 | Gene Map1s   | VCY2IP1, Map:  | microtubule-associated protein 1S                       | NM_173013.3      |
| 30 | Gene Haus8   | Hice1, Haus8,  | 4HAUS augmin-like complex, subunit 8                    | NM_029621.3, NM  |
| 30 | Gene Myo9b   | Myo9b          |                                                         | NM_015742.2, NM  |
| 34 | Gene Use1    | AV002165, p3:  | unconventional SNARE in the ER 1 homolog (S. cerev      | NM_025917.4, NM  |
| 43 | Gene Ocel1   | AI326022, Oce  | occludin/ELL domain containing 1                        | NM_029865.2      |
| 43 | Gene Nr2f6   | Erbal2, Nr2f6, | nuclear receptor subfamily 2, group F, member 6         | NM_010150.2      |
| 48 | Gene Ushbp1  | 9430064H24, U  | Usher syndrome 1C binding protein 1                     | NM_181418.3      |
| 48 | Gene Babam1  | Babam1, 5430   | BRISC and BRCA1 A complex member 1                      | NM_026636.2      |
| 48 | Gene Ankle1  | Lem3, 843043:  | ankyrin repeat and LEM domain containing 1              | NM_172756.2      |
| 29 | Gene Abhd8   | 0910001L24Ril  | abhydrolase domain containing 8                         | NM_022419.3      |
| 29 | Gene Mrpl34  | 0610007O17Ri   | mitochondrial ribosomal protein L34                     | NM_053162.2      |
| 29 | Gene Dda1    | Dda1, 170009:  | DET1 and DDB1 associated 1                              | NM_025600.1      |
| 17 | Gene Ano8    | BC053460, Tm   | anoctamin 8                                             | NM_001164679.1   |
| 17 | Gene Gtpbp3  | MGC102372, 2   | GTP binding protein 3                                   | NM_032544.3      |
| 36 | Gene Slc27a1 | FATP1, Fatp,   | Solute carrier family 27 (fatty acid transporter), men  | NM_011977.3      |
| 36 | Gene Pgl5    | AI447866, Pgl5 | 6-phosphogluconolactonase                               | NM_025396.3      |
| 36 | Gene Fam129c | Bcnp1, Fam12:  | family with sequence similarity 129, member C           | NM_001166213.1   |
| 28 | Gene Glt25d1 | Glt25d1, 2810  | glycosyltransferase 25 domain containing 1              | NM_146211.3      |
| 20 | Gene Unc13a  | 2410078G03Ri   | unc-13 homolog A (C. elegans)                           | NM_001029873.2   |
| 20 | Gene Jak3    | Jak3, wil, fae | Janus kinase 3                                          | NM_001190830.1   |
| 16 | Gene Zfp709  | GIOT-4, MGC2   | zinc finger protein 709                                 | NM_145624.4      |

|    |                   |                                                                    |                 |
|----|-------------------|--------------------------------------------------------------------|-----------------|
| 34 | Gene Tpm4         | Tpm4, 261052 tropomyosin 4                                         | NM_001001491.1  |
| 21 | Gene Rab8a        | Mel, Rab8a, A/RAB8A, member RAS oncogene family                    | NM_023126.2     |
| 31 | Gene Klf2         | Lklf, Klf2 Kruppel-like factor 2 (lung)                            | NM_008452.2     |
| 31 | Gene Eps15l1      | 9830147J04Ril epidermal growth factor receptor pathway substrate   | NM_007944.3, NM |
| 31 | Gene Calr3        | cspn, Crt2, 17C calreticulin 3                                     | NM_029782.3, NM |
| 48 | Gene Cherp        | 5730408111Rik calcium homeostasis endoplasmic reticulum protein    | NM_138585.3     |
| 48 | Gene Slc35e1      | AA408278, 60: solute carrier family 35, member E1                  | NM_177766.3     |
| 42 | Gene Med26        | Med26, 57304 mediator complex subunit 26                           | NM_027485.4     |
| 26 | Gene Nwd1         | A230063L24Ri NACHT and WD repeat domain containing 1               | NM_176940.5     |
| 26 | Gene Sin3b        | Sin3b, 281043 transcriptional regulator, SIN3B (yeast)             | NM_009188.3, NM |
| 26 | Gene Large        | froggy, mKIAA like-glycosyltransferase                             | NM_010687.1     |
| 27 | Gene Hmgxb4       | E430025G12, HMG box domain containing 4                            | NM_178017.1     |
| 27 | Gene Tom1         | Tom1 target of myb1 homolog (chicken)                              | NM_011622.3, NM |
| 26 | Gene Hmox1        | Hemox, Hmox, heme oxygenase (decycling) 1                          | NM_010442.2     |
| 26 | Gene Mcm5         | A1324988, mCl minichromosome maintenance deficient 5, cell divis   | NM_008566.2     |
| 21 | Gene Arhgap1      | A930033B01Ri Rho GTPase activating protein 10                      | NM_030113.2     |
| 21 | Gene 0610038      | 0610038B21Ri RIKEN cDNA 0610038B21 gene                            | NR_028125.1     |
| 28 | Gene Prmt10       | A1931714, Prm protein arginine methyltransferase 10 (putative)     | NM_001081240.3  |
| 38 | Gene Rbmxl1       | Rbmxl1, Rbmx RNA binding motif protein, X linked-like-1            | NM_009033.2, NM |
| 38 | Gene Slc10a7      | 2410193C02Ri solute carrier family 10 (sodium/bile acid cotranspor | NM_029736.1     |
| 26 | Gene Zfp827       | D630040G17R zinc finger protein 827                                | NM_178267.3     |
| 24 | Gene Smad1        | MusMPL, Mlp1, Madh1, Madr1, A1528653, Smad1                        | NM_008539.3     |
| 32 | Gene Otud4        | 4930431L18Ril OTU domain containing 4                              | NM_001081164.1  |
| 37 | Gene Abce1        | C79080, Abce1 ATP-binding cassette, sub-family E (OABP), member    | NM_015751.2     |
| 37 | Gene Anapc10      | Anapc10, A83C anaphase promoting complex subunit 10                | NM_026904.2     |
| 19 | Gene Hhip         | Hhip, Hhip1 Hedgehog-interacting protein                           | NM_020259.4     |
| 33 | Gene Smarca5      | D030040M08F SWI/SNF related, matrix associated, actin dependen     | NM_053124.2     |
| 39 | Gene Gab1         | AW107238, A/growth factor receptor bound protein 2-associated p    | NM_021356.2     |
| 33 | Gene Usp38        | mKIAA1891, A ubiquitin specific peptidase 38                       | NM_027554.2     |
| 33 | Gene LOC101055650 | uncharacterized LOC101055650                                       | XM_003945630.1  |
| 22 | Gene Zfp330       | Noa36, MGC1 zinc finger protein 330                                | NM_145600.1     |
| 30 | Gene Elmod2       | Elmod2, 98301 ELMO/CED-12 domain containing 2                      | NM_178736.5, NM |
| 35 | Gene Dnajb1       | HSPF1, 06100C DnaJ (Hsp40) homolog, subfamily B, member 1          | NM_018808.2     |
| 23 | Gene Gipc1        | GIPC, TIP-2, GI GIPC PDZ domain containing family, member 1        | NM_018771.3     |
| 22 | Gene Ptger1       | EP1, Ptger1, Pt prostaglandin E receptor 1 (subtype EP1)           | NM_013641.2     |
| 22 | Gene Pkn1         | F730027O18Ri protein kinase N1                                     | NM_177262.4, NM |
| 38 | Gene Ddx39        | 2610307C23Ri DEAD (Asp-Glu-Ala-Asp) box polypeptide 39             | NM_197982.3     |
| 38 | Gene Cd97         | TM7LN1, Cd97 CD97 antigen                                          | NM_011925.2, NM |
| 33 | Gene Lphn1        | mKIAA0821, A latrophilin 1                                         | NM_181039.2     |
| 29 | Gene Asf1b        | 1700003K02Ri ASF1 anti-silencing function 1 homolog B (S. cerevisi | NM_024184.2     |
| 29 | Gene Prkaca       | Pkaca, PKA, PK protein kinase, cAMP dependent, catalytic, alpha    | NM_008854.4     |
| 24 | Gene Samd1        | AA589507, Sar sterile alpha motif domain containing 1              | NM_001081415.1  |
| 24 | Gene 1700067      | 1700067K01Ri RIKEN cDNA 1700067K01 gene                            | NM_183097.2     |
| 20 | Gene 2210011      | 2210011C24Ri RIKEN cDNA 2210011C24 gene                            | XM_907367.2, XM |
| 20 | Gene Mir1199      | Mirn1199, mir microRNA 1199                                        | NR_035431.1     |
| 20 | Gene Palm3        | Palm3, 4432412L15Rik, AL024300                                     | NM_028877.1     |
| 20 | Gene Nanos3       | nos3, Nanos3, nanos homolog 3 (Drosophila)                         | NM_194059.2     |

|    |                   |                                                                    |                  |
|----|-------------------|--------------------------------------------------------------------|------------------|
| 20 | Gene Mir181d      | Mir181d, Mirn microRNA 181d                                        | NR_030534.1      |
| 20 | Gene Mir181c      | Mir181c, Mir microRNA 181c                                         | NR_029821.1      |
| 32 | Gene Mir23a       | Mir23a, Mirn2 microRNA 23a                                         | NR_029740.1      |
| 32 | Gene Mir27a       | Mir27a, mmu- microRNA 27a                                          | NR_029746.1      |
| 32 | Gene Mir24-2      | Mir24-2, Mirn: microRNA 24-2                                       | NR_029741.1      |
| 32 | Gene Mir3074      | mmu-mir-3074 microRNA 3074-2                                       | NR_037294.1      |
| 32 | Gene Zswim4       | Zswim4, D330(zinc finger SWIM-type containing 4                    | NM_172503.3      |
| 37 | Gene D8Ertd7      | D8Ertd738e, A DNA segment, Chr 8, ERATO Doi 738, expressed         | NM_001007571.2   |
| 37 | Gene Mri1         | 2410018C20Ri methylthioribose-1-phosphate isomerase homolog (      | NM_026423.4      |
| 37 | Gene Ccdc130      | Ccdc130, 4930 coiled-coil domain containing 130                    | NM_026350.2      |
| 15 | Gene Cacna1a      | Cav2.1, rocker, calcium channel, voltage-dependent, P/Q type, alph | NM_007578.3, NM  |
| 42 | Gene Ier2         | Pip92, Ier2, A: immediate early response 2                         | NM_010499.4      |
| 42 | Gene Nacc1        | Btbd14b, 4930 nucleus accumbens associated 1, BEN and BTB (POZ     | NM_025788.3      |
| 20 | Gene Trmt1        | D8Ertd812e, 6 tRNA methyltransferase 1                             | NM_001164559.1   |
| 29 | Gene Nfix         | Nfix                                                               | NM_010906.2, NM  |
| 17 | Gene G430095      | G430095P16Ri RIKEN cDNA G430095P16 gene                            | XR_106143.1      |
| 29 | Gene Dand5        | coco, MGC144 DAN domain family, member 5                           | NM_201227.3, NR  |
| 29 | Gene Gadd45       | Crif1, Plinp1, Agrowth arrest and DNA-damage-inducible, gamma ir   | NM_183358.4      |
| 52 | Gene Rad23a       | 2310040P19Ri RAD23a homolog (S. cerevisiae)                        | NM_009010.4      |
| 52 | Gene Calr         | Calregulin, CR1 calreticulin                                       | NM_007591.3      |
| 52 | Gene 1700122      | 1700122E12Ri RIKEN cDNA 1700122E12 gene                            | XR_108068.1, XR_ |
| 52 | Gene Farsa        | Farsla, Farsa, C phenylalanyl-tRNA synthetase, alpha subunit       | NM_025648.3      |
| 27 | Gene Klf1         | Eklf, Klf1, Nan Kruppel-like factor 1 (erythroid)                  | NM_010635.2      |
| 27 | Gene Dnase2a      | Dnase2a, Dnas deoxyribonuclease II alpha                           | NM_010062.3      |
| 27 | Gene Mast1        | 9430008B02Ri microtubule associated serine/threonine kinase 1      | NM_019945.2      |
| 26 | Gene Rtbnd        | Rtbnd, A33009 retbindin                                            | NM_144929.2      |
| 27 | Gene Rnaseh2      | Rnaseh2a, RN/ ribonuclease H2, large subunit                       | NM_027187.3      |
| 31 | Gene LOC101055733 | uncharacterized LOC101055733                                       | XM_003945631.1,  |
| 31 | Gene Prdx2        | TSA, Tdpx1, To peroxiredoxin 2                                     | NM_011563.5      |
| 31 | Gene Junb         | Junb                                                               | NM_008416.3      |
| 24 | Gene Hook2        | MGC28586, M hook homolog 2 (Drosophila)                            | NM_133255.2, NM  |
| 21 | Gene Asna1        | ArsA, 1810048 arsA arsenite transporter, ATP-binding, homolog 1 (I | NM_019652.1      |
| 22 | Gene 2310036      | 2310036O22Ri RIKEN cDNA 2310036O22 gene                            | NM_026760.2      |
| 29 | Gene Tnp2         | Kpnb2b, Tnp2: transportin 2 (importin 3, karyopherin beta 2b)      | NM_145390.4, NM  |
| 29 | Gene A230103      | A230103J11Ri RIKEN cDNA A230103J11 gene                            | XR_140910.1, XR_ |
| 34 | Gene Fbxw9        | Fbxw9, 11100: F-box and WD-40 domain protein 9                     | NM_026791.2      |
| 34 | Gene Gm5741       | MGC182257, P predicted gene 5741                                   | NM_001195531.1   |
| 34 | Gene Dhps         | Dhs, MGC7438 deoxyhypusine synthase                                | NM_001039514.1   |
| 34 | Gene Wdr83        | 1500041N16Ri WD repeat domain containing 83                        | NM_026399.2      |
| 34 | Gene BC05647      | BC056474, MC cDNA sequence BC056474                                | NM_001001493.2   |
| 30 | Gene Vps35        | AI647796, Vps vacuolar protein sorting 35                          | NM_022997.4      |
| 30 | Gene Orc6         | Orc6, Orc6l, 67 origin recognition complex, subunit 6              | NM_019716.2, NM  |
| 29 | Gene Gpt2         | ALT2, C87201, glutamic pyruvate transaminase (alanine aminotran    | NM_173866.3      |
| 31 | Gene Dnaja2       | DNJ3, PRO301. DnaJ (Hsp40) homolog, subfamily A, member 2          | NM_019794.4      |
| 25 | Gene Itfg1        | Itfg1, AI31445: integrin alpha FG-GAP repeat containing 1          | NM_028007.3      |
| 25 | Gene Phkb         | AI463271, Phk phosphorylase kinase beta                            | NM_199446.1      |
| 35 | Gene Lonp2        | Lonp, Lonp2, A lon peptidase 2, peroxisomal                        | NM_025827.3, NM  |

|    |                   |                                                                    |                  |
|----|-------------------|--------------------------------------------------------------------|------------------|
| 26 | Gene Siah1a       | AA982064, Sin seven in absentia 1A                                 | NM_009172.2      |
| 26 | Gene Gm1063       | Gm10638, ENS predicted gene 10638                                  | NR_027829.1      |
| 27 | Gene N4bp1        | N4bp1, AI4815 NEDD4 binding protein 1                              | NM_030563.2      |
| 28 | Gene Gm1987       | Gm19872 predicted gene, 19872                                      | XR_106147.2, XR_ |
| 28 | Gene Cbln1        | AI323299, Cblr cerebellin 1 precursor protein                      | NM_019626.3      |
| 28 | Gene Gm2694       | Gm2694 predicted gene 2694                                         | NR_033430.1      |
| 18 | Gene Zfp423       | Zfp104, Roaz, zinc finger protein 423                              | NM_033327.2      |
| 28 | Gene Cnep1r1      | Tmem188, Cnc CTD nuclear envelope phosphatase 1 regulatory sub     | NM_029074.3      |
| 22 | Gene Papd5        | 5830428A09, PAP associated domain containing 5                     | NM_001164497.1   |
| 30 | Gene Adcy7        | MGC141539, Adenylate cyclase 7                                     | NM_007406.2, NM  |
| 18 | Gene Brd7         | Brd7, Ptpn13ip bromodomain containing 7                            | NM_012047.2      |
| 20 | Gene Nkd1         | Nkd, 2810434J naked cuticle 1 homolog (Drosophila)                 | NM_027280.3, NM  |
| 21 | Gene Snx20        | 9130017C17Ri sorting nexin 20                                      | NM_027840.3      |
| 20 | Gene Nod2         | CD, IBD1, Nod: nucleotide-binding oligomerization domain containi  | NM_145857.2      |
| 20 | Gene Cyld         | Cyld, C130039 cylindromatosis (turban tumor syndrome)              | NM_173369.2, NM  |
| 23 | Gene Chd9         | A330063D19Ri chromodomain helicase DNA binding protein 9           | NM_177224.2      |
| 33 | Gene Rbl2         | Rbl2, p130, Rb retinoblastoma-like 2                               | NM_011250.3      |
| 18 | Gene Irx3         | Irx3, AI894186 Iroquois related homeobox 3 (Drosophila)            | NM_001253822.1   |
| 18 | Gene LOC101055810 | uncharacterized LOC101055810                                       | XM_003945632.1,  |
| 16 | Gene Mmp2         | MMP-2, GelA, matrix metalloproteinase 2                            | NM_008610.2      |
| 26 | Gene Amfr         | Amfr, gp78 autocrine motility factor receptor                      | NM_011787.2      |
| 26 | Gene Nudt21       | Cpsf5, 311004i nudix (nucleoside diphosphate linked moiety X)-type | NM_026623.3      |
| 29 | Gene Nup93        | Nup93, 24100f nucleoporin 93                                       | NM_172410.2      |
| 29 | Gene Rpl10-ps     | Rpl10-ps5, Gm ribosomal protein L10, pseudogene 5                  |                  |
| 45 | Gene Herpud1      | Herpud1, SUP, homocysteine-inducible, endoplasmic reticulum stre   | NM_022331.1      |
| 20 | Gene Nlrc5        | Nlrc5, AK2202: NLR family, CARD domain containing 5                | NM_001033207.3   |
| 20 | Gene Cpne2        | 3322401K10Ri copine II                                             | NM_153507.2      |
| 31 | Gene Ciapin1      | Ciapin1, AU02: cytokine induced apoptosis inhibitor 1              | NM_134141.4      |
| 31 | Gene Gm7418       | Gm7418 ribosomal protein L7A pseudogene                            |                  |
| 31 | Gene Coq9         | Coq9, 231000f coenzyme Q9 homolog (yeast)                          | NM_026452.2      |
| 25 | Gene Polr2c       | Polr2c, mRBP3 polymerase (RNA) II (DNA directed) polypeptide C     | NM_009090.5      |
| 25 | Gene Dok4         | Dok4 docking protein 4                                             | NM_053246.3      |
| 20 | Gene Ccdc102      | Ccdc102a, Gm coiled-coil domain containing 102A                    | NM_001033533.3   |
| 20 | Gene Gpr114       | Gpr114, Gm11G protein-coupled receptor 114                         | NM_001033468.3   |
| 31 | Gene Tepp         | MGC107117, T testis, prostate and placenta expressed               | NM_199455.1, NM  |
| 31 | Gene Zfp319       | Znf319, AI2257 zinc finger protein 319                             | NM_024467.3      |
| 31 | Gene Usb1         | AA960436, Usl U6 snRNA biogenesis 1                                | NM_133954.2      |
| 26 | Gene Mmp15        | Mmp15, AI503 matrix metalloproteinase 15                           | NM_008609.3      |
| 17 | Gene Csnk2a2      | 1110035J23Ri casein kinase 2, alpha prime polypeptide              | NM_009974.3      |
| 19 | Gene Gins3        | AI616142, 270 GINS complex subunit 3 (Psf3 homolog)                | NM_030198.3      |
| 24 | Gene Ndr4         | SMAP-8, Ndr4, N-myc downstream regulated gene 4                    | NM_145602.3, NM  |
| 24 | Gene Setd6        | C76402, 3110C SET domain containing 6                              | NM_001035123.3   |
| 24 | Gene Cnot1        | MGC189936, CCR4-NOT transcription complex, subunit 1               | NM_153164.3, NM  |
| 23 | Gene 4930513      | 4930513N10Ri RIKEN cDNA 4930513N10 gene                            | NR_015574.2      |
| 21 | Gene Bean1        | Bean, MGC16f brain expressed, associated with Nedd4, 1             | NM_001141922.1,  |
| 20 | Gene Tk2          | AU024611, Tk: thymidine kinase 2, mitochondrial                    | NM_021028.3, NR  |
| 20 | Gene Cklf         | CKLF3, CKLF4, chemokine-like factor                                | NM_001037841.2   |



|    |               |                                                                                       |                          |
|----|---------------|---------------------------------------------------------------------------------------|--------------------------|
| 20 | Gene A730028  | A730028G07R RIKEN cDNA A730028G07 gene                                                | XR_108031.1, XR_108031.1 |
| 21 | Gene Cmtm4    | Cklfsf4, Cmtm4 CKLF-like MARVEL transmembrane domain containing 4                     | NM_153582.5              |
| 24 | Gene Dync1li2 | Dync1li2, AA401 dynein, cytoplasmic 1 light intermediate chain 2                      | NM_001013380.2           |
| 24 | Gene Ccdc79   | 4930532D21Ri coiled-coil domain containing 79                                         | NM_180958.3              |
| 22 | Gene Nae1     | Nae1, 59kDa, INEDD8 activating enzyme E1 subunit 1                                    | NM_144931.3              |
| 22 | Gene Car7     | AV343731, Car carbonic anhydrase 7                                                    | NM_053070.3              |
| 16 | Gene Cdh16    | Cdh16                                                                                 | NM_001252627.1           |
| 16 | Gene Rrad     | Rrad, Rad, REN Ras-related associated with diabetes                                   | NM_019662.2              |
| 16 | Gene Fam96b   | 1110019N10Ri family with sequence similarity 96, member B                             | NM_026753.2              |
| 20 | Gene Ces4a    | Ces8, MGC311 carboxylesterase 4A                                                      | NM_146213.2              |
| 29 | Gene Cbfb     | PEA2, Pebpb2, core binding factor beta                                                | NM_022309.4, NM_022309.4 |
| 32 | Gene D230025  | BC006874, D2: RIKEN cDNA D230025D16 gene                                              | NM_145604.2              |
| 32 | Gene B3gnt9   | MGC117964, B3gnt9, 3-Gn-T9, C76565, beta-1, B3gnt9-ps, C76566                         | NM_178879.3              |
| 32 | Gene Tradd    | Tradd, AA9308 TNFRSF1A-associated via death domain                                    | NM_001033161.2           |
| 32 | Gene Fbxl8    | FBL8, Fbxl8 F-box and leucine-rich repeat protein 8                                   | NM_015821.2              |
| 23 | Gene Hsf4     | mHSF4, ldis1, l heat shock transcription factor 4                                     | NM_001256042.1           |
| 35 | Gene Nol3     | Nop30, B4303: nucleolar protein 3 (apoptosis repressor with CARD domain)              | NM_030152.4              |
| 35 | Gene 4931428  | Kiaa0895l, A14: RIKEN cDNA 4931428F04 gene                                            | NM_028888.2, NM_028888.2 |
| 35 | Gene Exoc3l   | C730015A04Ri exocyst complex component 3-like                                         | NM_177788.4              |
| 35 | Gene E2f4     | A1427446, 201 E2F transcription factor 4                                              | NM_148952.1              |
| 22 | Gene Elmo3    | Ced12, Elmo3, engulfment and cell motility 3                                          | NM_172760.3              |
| 22 | Gene Mir328   | Mirn328, mmu microRNA 328                                                             | NR_029761.1              |
| 20 | Gene Fhod1    | FHOS1, Fhod1, formin homology 2 domain containing 1                                   | NM_177699.4              |
| 20 | Gene Slc9a5   | Slc9a5, Gm696 solute carrier family 9 (sodium/hydrogen exchanger) member 5            | NM_001081332.1           |
| 40 | Gene Zdhhc1   | Zdhhc1, 44324 zinc finger, DHHC domain containing 1                                   | NM_175160.3              |
| 22 | Gene Atp6v0d  | A1267038, Atp1 ATPase, H+ transporting, lysosomal V0 subunit D1                       | NM_013477.3              |
| 22 | Gene Agrp     | Art, Agrp, Agrt agouti related protein                                                | NM_007427.2              |
| 26 | Gene Fam65a   | MGC100216, F family with sequence similarity 65, member A                             | NM_001081241.2           |
| 26 | Gene Mir1966  | mmu-mir-1966 microRNA 1966                                                            | NR_035492.1              |
| 26 | Gene Gm5914   | Gm5914 predicted gene 5914                                                            | XR_108033.1, XR_108033.1 |
| 26 | Gene Ctcf     | AW108038, Ct CCCTC-binding factor                                                     | NM_181322.3              |
| 18 | Gene Rltpr    | D130029J02Ril RGD motif, leucine rich repeats, tropomodulin domain                    | NM_001033320.2           |
| 18 | Gene Acd      | Acd adrenocortical dysplasia                                                          | NM_001012638.1           |
| 18 | Gene Pard6a   | 0710008C04Ri par-6 (partitioning defective 6,) homolog alpha (C. elegans)             | NM_019695.2, NM_019695.2 |
| 18 | Gene Enkd1    | Enkd1, E13030 enkurin domain containing 1                                             | NM_198299.1              |
| 18 | Gene 4933405  | 4933405L10Ril RIKEN cDNA 4933405L10 gene                                              | NM_027655.1              |
| 33 | Gene Gfod2    | Gfod2, 573046 glucose-fructose oxidoreductase domain containing                       | NM_027469.4              |
| 33 | Gene Ranbp10  | 4432417N03Ri RAN binding protein 10                                                   | NM_145824.4              |
| 30 | Gene Cenpt    | G630055P03Ri centromere protein T                                                     | NM_177150.2              |
| 30 | Gene Thap11   | 2810036E22Ri THAP domain containing 11                                                | NM_021513.2              |
| 30 | Gene Nutf2    | AW546000, M nuclear transport factor 2                                                | NM_026532.3              |
| 36 | Gene Slc12a4  | RBCKCC1, AW5 solute carrier family 12, member 4                                       | NM_001253804.1           |
| 36 | Gene Dpep3    | MBD-3, A1507 dipeptidase 3                                                            | NM_027960.2              |
| 37 | Gene Dus2l    | Dus2l, 231001 dihydrouridine synthase 2-like (SMM1, S. cerevisiae)                    | NM_025518.3              |
| 37 | Gene Nfatc3   | NFATx, NFAT4, nuclear factor of activated T cells, cytoplasmic, calcineurin dependent | NM_010901.2              |
| 25 | Gene Esrp2    | Esrp2, 953002 epithelial splicing regulatory protein 2                                | NM_176838.2              |
| 25 | Gene 1810019  | 1810019D21Ril RIKEN cDNA 1810019D21 gene                                              | NR_040344.1, NR_040344.1 |

|    |               |                                                                               |                  |
|----|---------------|-------------------------------------------------------------------------------|------------------|
| 34 | Gene Pla2g15  | LLPL, Lypla3, L <sub>1</sub> phospholipase A2, group XV                       | NM_133792.2      |
| 34 | Gene Slc7a6   | LAT3, Slc7a6, L solute carrier family 7 (cationic amino acid transport        | NM_178798.3      |
| 26 | Gene Slc7a6os | 2400002F02Ri solute carrier family 7, member 6 opposite strand                | NM_001007567.2   |
| 26 | Gene Prmt7    | MGC7929, BC protein arginine N-methyltransferase 7                            | NM_145404.1      |
| 20 | Gene A930006  | A930006D01Ri RIKEN cDNA A930006D01 gene                                       | XR_106168.2, XR_ |
| 20 | Gene Zfp90    | 6430515L01Ri zinc finger protein 90                                           | NM_011764.3      |
| 29 | Gene 1110028  | 1110028F18Ri RIKEN cDNA 1110028F18 gene                                       | NR_045470.1      |
| 29 | Gene Cdh1     | AA960649, Urr cadherin 1                                                      | NM_009864.2      |
| 27 | Gene Tango6   | Tango6, E3300 transport and golgi organization 6                              | NM_173037.1      |
| 31 | Gene Has3     | Has3                                                                          | NM_008217.4      |
| 31 | Gene Chtf8    | Ctf8, 5830457(CTF8, chromosome transmission fidelity factor 8                 | NM_145412.3      |
| 31 | Gene Cirh1a   | Naic, Cirhin, Ci cirrhosis, autosomal recessive 1A (human)                    | NM_011574.2      |
| 35 | Gene Sntb2    | Sntb2, Snt2 syntrophin, basic 2                                               | NM_009229.4      |
| 37 | Gene Vps4a    | 4930589C15Ri vacuolar protein sorting 4a (yeast)                              | NM_126165.1      |
| 34 | Gene Pdf      | 2610019N19Ri peptide deformylase (mitochondrial)                              | NM_026513.2      |
| 34 | Gene Cog8     | C87832, Cog8, component of oligomeric golgi complex 8                         | NM_139229.4      |
| 34 | Gene Nip7     | 1110017C15Ri nuclear import 7 homolog ( <i>S. cerevisiae</i> )                | NM_001164472.1,  |
| 30 | Gene Tmed6    | 1810015P03Ri transmembrane emp24 protein transport domain co                  | NM_025458.2      |
| 17 | Gene Terf2    | TRF2, Terf2 telomeric repeat binding factor 2                                 | NM_001083118.1   |
| 36 | Gene Nfat5    | TonEBP, AI225 nuclear factor of activated T cells 5                           | NM_133957.3, NM  |
| 42 | Gene Psmd7    | Mov-34, Mov3 proteasome (prosome, macropain) 26S subunit, non                 | NM_010817.2      |
| 19 | Gene Zfhx3    | Atbf1, mKIAA4 zinc finger homeobox 3                                          | NM_007496.2      |
| 31 | Gene Ist1     | AW536298, m increased sodium tolerance 1 homolog (yeast)                      | NM_028018.2      |
| 31 | Gene Ap1g1    | D8Ertd374e, A adaptor protein complex AP-1, gamma 1 subunit                   | NM_009677.5      |
| 18 | Gene Phlpp2   | KIAA0931, Phl <sub>1</sub> PH domain and leucine rich repeat protein phosphat | NM_001122594.2   |
| 21 | Gene Zfp612   | Zfp612, B2303 zinc finger protein 612                                         | NM_175480.4      |
| 38 | Gene Hydin    | Hydin, A83006 HYDIN, axonemal central pair apparatus protein                  | NM_172916.2      |
| 38 | Gene Vac14    | Vac14, Tax1bp Vac14 homolog ( <i>S. cerevisiae</i> )                          | NM_146216.2      |
| 29 | Gene Sf3b3    | Sf3b3, AA4093 splicing factor 3b, subunit 3                                   | NM_133953.2      |
| 29 | Gene Snord11  | Snord111, MBI small nucleolar RNA, C/D box 111                                | NR_028559.1      |
| 29 | Gene Cog4     | Cog4, D8Ert5 component of oligomeric golgi complex 4                          | NM_133973.2      |
| 18 | Gene St3gal2  | Siat5, St3gal2, ST3 beta-galactoside alpha-2,3-sialyltransferase 2            | NM_009179.3      |
| 47 | Gene Aars     | Aars, C76919, alanyl-tRNA synthetase                                          | NM_146217.3      |
| 47 | Gene Exosc6   | Exosc6, C76919, exosome component 6                                           | NM_028274.3      |
| 24 | Gene Pdpr     | AU018056, Pdpr, mKIAA1990, 4930402E16Rik                                      | NM_198308.1      |
| 38 | Gene Glg1     | Glg1, Selel, ES1 golgi apparatus protein 1                                    | NM_009149.2      |
| 31 | Gene Rfwd3    | MGC27888, BC ring finger and WD repeat domain 3                               | NM_146218.4      |
| 29 | Gene Znrf1    | nin283, B8300 zinc and ring finger 1                                          | NM_133206.3, NM  |
| 25 | Gene Zfp1     | Zfp1, mkr-1, Fr zinc finger protein 1                                         | NM_011742.2, NM  |
| 24 | Gene Bcar1    | Bcar1, AI38568 breast cancer anti-estrogen resistance 1                       | NM_009954.3, NM  |
| 23 | Gene Cfdp1    | cp27, Bcnc, Cfc craniofacial development protein 1                            | NM_011801.1      |
| 26 | Gene Chst5    | Chst5, Gn6st-3 carbohydrate (N-acetylglucosamine 6-O) sulfotransf             | NM_019950.2      |
| 34 | Gene Tmem23   | 4932417I16Rik transmembrane protein 231                                       | NM_001033321.1   |
| 34 | Gene Gabarap  | AI173605, 290 gamma-aminobutyric acid (GABA) A receptor-associ                | NM_026693.5      |
| 27 | Gene Kars     | LysRS, AL0243, lysyl-tRNA synthetase                                          | NM_053092.2, NM  |
| 27 | Gene Terf2ip  | Terf2ip, Rap1                                                                 | NM_020584.2      |
| 34 | Gene Maf      | 2810401A20Ri avian musculoaponeurotic fibrosarcoma (v-maf) AS                 | NM_001025577.2   |

|    |              |                                                                       |                  |
|----|--------------|-----------------------------------------------------------------------|------------------|
| 26 | Gene Cdy12   | 4930453121Rik chromodomain protein, Y chromosome-like 2               | NM_029441.3      |
| 34 | Gene Cmc2    | Cmc2, 111004i COX assembly mitochondrial protein 2                    | NM_026844.3      |
| 34 | Gene Cenpn   | AI426416, 261 centromere protein N                                    | NM_028131.3      |
| 32 | Gene Atmin   | MGC79206, At ATM interactor                                           | NM_177700.4      |
| 27 | Gene Gcsh    | 1100001L02Ril glycine cleavage system protein H (aminomethyl car      | NM_026572.3      |
| 27 | Gene Pkd1l2  | 1700126L06Ril polycystic kidney disease 1 like 2                      | NM_029686.4      |
| 39 | Gene Gan     | gigaxonin, Gangiant axonal neuropathy                                 | NM_001081151.1   |
| 41 | Gene Cmp1    | 4933407C03Ri c-Maf inducing protein                                   | NM_001163262.1   |
| 18 | Gene Mphosp  | AA536809, Mφ M phase phosphoprotein 6                                 | NM_026758.3      |
| 18 | Gene Gm1061  | Gm10617, ENS predicted gene 10617                                     | XR_140899.2, XR_ |
| 23 | Gene Mlycd   | Mcd, AI324784 malonyl-CoA decarboxylase                               | NM_019966.2      |
| 25 | Gene Hsd1l   | Hsd1l, 270006 hydroxysteroid dehydrogenase like 1                     | NM_175185.4      |
| 25 | Gene Dnaaf1  | Lrrc50, 493045 dynein, axonemal assembly factor 1                     | NM_026648.4      |
| 18 | Gene Taf1c   | Taf1c, mTAFI9i TATA box binding protein (Tbp)-associated factor, RI   | NM_021441.2      |
| 18 | Gene Rps13-p | Gm6834, EG62 ribosomal protein S13, pseudogene 4                      | XM_003086703.2,  |
| 18 | Gene Adad2   | Adad2, 493040 adenosine deaminase domain containing 2                 | NM_029428.1      |
| 36 | Gene Klh136  | MGC37805, Klh136                                                      | NM_146219.1      |
| 30 | Gene Usp10   | mKIAA0190, U ubiquitin specific peptidase 10                          | NM_009462.1      |
| 20 | Gene Zdhhc7  | AL024087, Zdh zinc finger, DHHC domain containing 7                   | NM_133967.3      |
| 21 | Gene 6430548 | 6430548M08R RIKEN cDNA 6430548M08 gene                                | NM_172286.4, NM  |
| 27 | Gene Gse1    | mKIAA0182, G genetic suppressor element 1                             | NM_198671.2, NM  |
| 40 | Gene Emc8    | Fam158b, Emc ER membrane protein complex subunit 8                    | NM_010926.5      |
| 40 | Gene Cox4i1  | Cox4, Cox4a, C cytochrome c oxidase subunit IV isoform 1              | NM_009941.2      |
| 30 | Gene Mthfsd  | BC052066, AW methenyltetrahydrofolate synthetase domain conta         | NM_172761.3, NM  |
| 30 | Gene Foxc2   | Hfhbf3, Foxc2, forkhead box C2                                        | NM_013519.2      |
| 30 | Gene Foxl1   | Foxl1, FREAC7, forkhead box L1                                        | NM_008024.2      |
| 37 | Gene Zcchc14 | AA792890, Zcc zinc finger, CCHC domain containing 14                  | NM_080855.2      |
| 25 | Gene Klhdc4  | AV352552, BCi kelch domain containing 4                               | NM_145605.2      |
| 55 | Gene Slc7a5  | 4F2LC, TA1, DC solute carrier family 7 (cationic amino acid transport | NM_011404.3      |
| 55 | Gene BC04864 | BC048644 cDNA sequence BC048644                                       | NM_001033485.2   |
| 55 | Gene Car5a   | Car5a, Ca5a, C carbonic anhydrase 5a, mitochondrial                   | NM_007608.2      |
| 28 | Gene Banp    | Banp, AA4081i BTG3 associated nuclear protein                         | NM_016812.3, NM  |
| 26 | Gene Gm22    | Gm22 predicted gene 22                                                | XM_001001798.3,  |
| 26 | Gene Zfpm1   | Fog1, Zfpm1, F zinc finger protein, multitype 1                       | NM_009569.3      |
| 28 | Gene Zc3h18  | Nhn1, Zc3h18, zinc finger CCCH-type containing 18                     | NM_001029994.1   |
| 25 | Gene Rnf166  | Rnf166, Zfp31i ring finger protein 166                                | NM_001033142.2   |
| 25 | Gene Ctu2    | Ncs2, C16orf84 cytosolic thiouridylase subunit 2 homolog (S. pombe    | NM_153775.2      |
| 32 | Gene Piezo1  | 9630020g22, Piezo1, mKIAA0233, Fam38a                                 | NM_001037298.1   |
| 32 | Gene Cdt1    | C76791, Cdt1, chromatin licensing and DNA replication factor 1        | NM_026014.3      |
| 32 | Gene Aprt    | Aprt, MGC117 adenine phosphoribosyl transferase                       | NM_009698.2      |
| 32 | Gene Galns   | mFLJ00319, G4 galactosamine (N-acetyl)-6-sulfate sulfatase            | NM_016722.4, NM  |
| 30 | Gene Cbfa2t3 | Cbfa2t3, AI465 core-binding factor, runt domain, alpha subunit 2, tr  | NM_009824.2, NM  |
| 29 | Gene Ankrd11 | 9530048i21Rik ankyrin repeat domain 11                                | NM_001081379.2   |
| 29 | Gene 2810013 | 2810013P06Ri RIKEN cDNA 2810013P06 gene                               | NR_045268.1      |
| 68 | Gene Spg7    | PGN, Cmar, AL spastic paraplegia 7 homolog (human)                    | NM_153176.4      |
| 68 | Gene Rpl13   | L13, Rpl13 ribosomal protein L13                                      | NM_016738.5      |
| 68 | Gene Snord68 | MBII-202, Snoi small nucleolar RNA, C/D box 68                        | NR_028128.1      |

|    |                                                                                  |                 |
|----|----------------------------------------------------------------------------------|-----------------|
| 22 | Gene Chmp1a Pcoln3, 29000: charged multivesicular body protein 1A                | NM_145606.3     |
| 22 | Gene Rps12-p: ENSMUSG000( ribosomal protein S12, pseudogene 9                    |                 |
| 26 | Gene 4732415 4732415M23R RIKEN cDNA 4732415M23 gene                              | NM_177279.4     |
| 26 | Gene Cdk10 Cdk10, BC0171 cyclin-dependent kinase 10                              | NM_194446.2, NM |
| 26 | Gene Spata2l KIAA4138, Spa spermatogenesis associated 2-like                     | NM_030176.2     |
| 26 | Gene 4933417 4933417D19Ri RIKEN cDNA 4933417D19 gene                             | NR_045849.1     |
| 33 | Gene Vps9d1 Vps9d1, 2410C VPS9 domain containing 1                               | NM_028200.1     |
| 33 | Gene Zfp276 Zfp276, Znf276 zinc finger protein (C2H2 type) 276                   | NM_020497.2     |
| 29 | Gene Spire2 BC026502, Spi spire homolog 2 (Drosophila)                           | NM_172287.2     |
| 29 | Gene Tcf25 Nulp1, Tcf25, r transcription factor 25 (basic helix-loop-helix)      | NM_025804.2, NM |
| 34 | Gene Afg3l1 3110061K15Ri AFG3(ATPase family gene 3)-like 1 (yeast)               | NM_054070.3, NR |
| 20 | Gene Rhou WRCH1, AI182 ras homolog gene family, member U                         | NM_133955.4     |
| 24 | Gene Ccsap Ccsap, 170005 centriole, cilia and spindle associated protein         | NM_028536.1     |
| 24 | Gene Nup133 Nup133, merr nucleoporin 133                                         | NM_172288.2     |
| 24 | Gene Abcb10 Abcb12, Abcb1 ATP-binding cassette, sub-family B (MDR/TAP), mem      | NM_019552.2     |
| 24 | Gene Galnt2 Galnt2, AI4806 UDP-N-acetyl-alpha-D-galactosamine:polypeptide N      | NM_139272.2     |
| 20 | Gene Pgbd5 Pgbd5, AI8543 piggyBac transposable element derived 5                 | NM_171824.2     |
| 32 | Gene Cog2 Ldlc, 2700012f component of oligomeric golgi complex 2                 | NM_029746.3     |
| 21 | Gene 2310022 2310022B05Ri RIKEN cDNA 2310022B05 gene                             | NM_175149.4     |
| 21 | Gene Ttc13 BC017545, MC tetratricopeptide repeat domain 13                       | NM_145607.3     |
| 21 | Gene Trim67 TNL, Trim67, D tripartite motif-containing 67                        | NM_198632.2     |
| 37 | Gene 2810004 3110004G14Ri RIKEN cDNA 2810004N23 gene                             | NM_025615.2     |
| 41 | Gene Gnpat D1Ert819e, D glyceronephosphate O-acyltransferase                     | NM_010322.3     |
| 41 | Gene Exoc8 R74783, SEC84 exocyst complex component 8                             | NM_198103.2     |
| 41 | Gene Sprtn Gm505, Sprtn SprT-like N-terminal domain                              | NM_001111141.1  |
| 41 | Gene EglN1 AI503754, Eglr EGL nine homolog 1 (C. elegans)                        | NM_053207.2     |
| 34 | Gene Tsnax Trax, R74833, `translin-associated factor X                           | NM_016909.2     |
| 26 | Gene LOC101056077 uncharacterized LOC101056077                                   | XM_003945637.1, |
| 31 | Gene Map10 KIAA1383, mKl microtubule-associated protein 10                       | NM_028908.3     |
| 33 | Gene BC02189f mKIAA1804, M cDNA sequence BC021891                                | NM_145608.2     |
| 21 | Gene Slc35f3 B230375D17Ri solute carrier family 35, member F3                    | NM_175434.3     |
| 35 | Gene Coa6 1810063B05Ri cytochrome c oxidase assembly factor 6                    | NM_174987.4     |
| 35 | Gene Gm1729 Gm179, Gm17 predicted gene, 17296                                    | NM_001159907.1  |
| 67 | Gene Irf2bp2 IRF-2BP2, E13( interferon regulatory factor 2 binding protein 2     | NM_001164598.1  |
| 25 | Gene Pard3 Pard3a, ASIP, I par-3 (partitioning defective 3) homolog (C. elegans) | NM_001013581.2  |
| 21 | Gene Nrp1 Nrp, Nrp1, NPI neuropilin 1                                            | NM_008737.2     |
| 21 | Gene Mir1903 Mirn1903, Mir microRNA 1903                                         | NR_035436.1     |
| 18 | Gene Gucy1a2 A230060L24Ri guanylate cyclase 1, soluble, alpha 2                  | NM_001033322.2  |
| 29 | Gene Dync2h1 DHC1b, DHC2, dynein cytoplasmic 2 heavy chain 1                     | NM_029851.2     |
| 29 | Gene Dcun1d5 AW060460, D4 DCN1, defective in cullin neddylation 1, domain con    | NM_029775.2     |
| 24 | Gene Tmem12 MGC102366, 2 transmembrane protein 123                               | NM_133739.2     |
| 30 | Gene Yap1 Yap65, Yap1, Y yes-associated protein 1                                | NM_001171147.1  |
| 18 | Gene Pgr PR-A, Pgr, PR-E progesterone receptor                                   | NM_008829.2     |
| 32 | Gene Arhgap4 BE136619, 90E Rho GTPase activating protein 42                      | NM_027823.1     |
| 32 | Gene Gm1683 Gm16833 predicted gene, 16833                                        | NR_045754.1     |
| 32 | Gene Cep57 Tsp57, AI4674i centrosomal protein 57                                 | NM_026665.4, NR |
| 32 | Gene Fam76b Fam76b, C783i family with sequence similarity 76, member B           | NM_176836.3     |

|    |      |              |                |                                                                              |                  |
|----|------|--------------|----------------|------------------------------------------------------------------------------|------------------|
| 26 | Gene | Sesn3        | 5630400E15Ri   | sestrin 3                                                                    | NM_030261.4      |
| 30 | Gene | Endod1       | Endod1, 22104  | endonuclease domain containing 1                                             | NM_028013.3      |
| 16 | Gene | Kdm4d        | Kdm4d, 49324   | lysine (K)-specific demethylase 4D                                           | NM_173433.2, XM  |
| 16 | Gene | Cwc15        | mED1, Ed1, c1  | CWC15 homolog ( <i>S. cerevisiae</i> )                                       | NM_023153.3      |
| 20 | Gene | Gpr83        | RP105, Gpr83,  | G protein-coupled receptor 83                                                | NM_010287.2      |
| 24 | Gene | Panx1        | Panx1, A18477  | pannexin 1                                                                   | NM_019482.2      |
| 24 | Gene | Heph1l       | zyklopen, Zp,  | Hephaestin-like 1                                                            | NM_001164797.1   |
| 25 | Gene | 4931406C     | 4931406C07Ri   | RIKEN cDNA 4931406C07 gene                                                   | NM_001199484.1   |
| 25 | Gene | Taf1d        | 2810003M17R    | TATA box binding protein (Tbp)-associated factor, RIKEN cDNA 2810003M17 gene | NM_029248.2, NM  |
| 23 | Gene | 5830418G     | Gm1131, Kiaa1  | RIKEN cDNA 5830418K08 gene                                                   | NM_176976.4      |
| 16 | Gene | Slc36a4      | 6330573I15Ri   | solute carrier family 36 (proton/amino acid symport)                         | NM_172289.4      |
| 21 | Gene | Zfp426       | MGC38791, 25   | zinc finger protein 426                                                      | NM_146221.4, NM  |
| 21 | Gene | Zfp266       | AW552317, 53   | zinc finger protein 266                                                      | NM_001082485.1   |
| 25 | Gene | Fbxl12       | Fbl12, 311004  | F-box and leucine-rich repeat protein 12                                     | NM_013911.2, NM  |
| 25 | Gene | Ubl5         | 1110030M22R    | ubiquitin-like 5                                                             | NM_025401.3      |
| 25 | Gene | Pin1         | Pin1, D9Bwg11  | protein (peptidyl-prolyl cis/trans isomerase) NIMA-inhibitor                 | NM_023371.3      |
| 20 | Gene | A230050C     | A230050P20Ri   | RIKEN cDNA A230050P20 gene                                                   | NM_175687.2      |
| 44 | Gene | Angptl6      | Angptl6, ARP3, | angiopoietin-like 6                                                          | NM_145154.2      |
| 44 | Gene | Ppan         | Ppan, A23008   | peter pan homolog ( <i>Drosophila</i> )                                      | NM_145610.2      |
| 44 | Gene | Eif3g        | eIF3-p44, 44kD | eukaryotic translation initiation factor 3, subunit G                        | NM_016876.3      |
| 22 | Gene | Dnmt1        | MTase, Met-1,  | DNA methyltransferase (cytosine-5) 1                                         | NM_001199431.1   |
| 36 | Gene | S1pr2        | LPb2, S1P2, H2 | sphingosine-1-phosphate receptor 2                                           | NM_010333.4      |
| 22 | Gene | Mrpl4        | Mrpl4, 111001  | mitochondrial ribosomal protein L4                                           | NM_023167.2      |
| 28 | Gene | Icam1        | MGC6195, MA    | intercellular adhesion molecule 1                                            | NM_010493.2      |
| 28 | Gene | Icam4        | 1810015M19R    | intercellular adhesion molecule 4, Landsteiner-Wien                          | NM_023892.2      |
| 28 | Gene | Icam5        | MGC130520, T   | intercellular adhesion molecule 5, telencephalin                             | NM_008319.2      |
| 28 | Gene | Mir1900      | mmu-mir-190    | (microRNA 1900)                                                              | NR_035438.1      |
| 28 | Gene | LOC101055759 |                | uncharacterized LOC101055759                                                 | XM_003945443.1,  |
| 29 | Gene | Zglp1        | Zglp1, Glp1    | zinc finger, GATA-like protein 1                                             | NM_001103168.1   |
| 29 | Gene | Raver1-fdx1l |                | Raver1-Fdx1l readthrough                                                     | NR_038081.2      |
| 29 | Gene | Fdx1l        | B230118G17Ri   | ferredoxin 1-like                                                            | NM_001039824.2   |
| 29 | Gene | Raver1       | MGC118403, F   | ribonucleoprotein, PTB-binding 1                                             | NM_027911.3      |
| 21 | Gene | Pde4a        | Dpde2, Pde4a,  | phosphodiesterase 4A, cAMP specific                                          | NM_183408.3, NM  |
| 21 | Gene | Gm1675       | Gm16754        | predicted gene, 16754                                                        | XR_108134.1, XR_ |
| 21 | Gene | Keap1        | mKIAA0132, K   | kelch-like ECH-associated protein 1                                          | NM_016679.4, NM  |
| 21 | Gene | S1pr5        | S1P5, lpB4, Ed | sphingosine-1-phosphate receptor 5                                           | NM_053190.2      |
| 26 | Gene | Ilf3         | NF90, MPHOS1   | interleukin enhancer binding factor 3                                        | NM_010561.2, NM  |
| 26 | Gene | Gm1685       | Gm16853, 493   | predicted gene, 16853                                                        | NR_045742.1      |
| 26 | Gene | Qrt1         | Tgt, 2610028E  | queuine tRNA-ribosyltransferase 1                                            | NM_021888.2      |
| 25 | Gene | Dnm2         | Dnm2, Dyn2     | dynamitin 2                                                                  | NM_001039520.2   |
| 29 | Gene | Mir1946      | Mir1946b, mr   | microRNA 1946b                                                               | NR_035496.1      |
| 29 | Gene | Smarca4      | HP1-BP72, Sm   | SWI/SNF related, matrix associated, actin dependent                          | NM_001174078.1   |
| 18 | Gene | Ldlr         | Hlb301, Ldlr   | low density lipoprotein receptor                                             | NM_001252658.1   |
| 26 | Gene | Kank2        | Ankrd25, Kank  | KN motif and ankyrin repeat domains 2                                        | NM_145611.4      |
| 30 | Gene | Dock6        | C330023D02Ri   | dedicator of cytokinesis 6                                                   | NM_177030.3      |
| 17 | Gene | Swsap1       | 2310047B19Ri   | SWIM type zinc finger 7 associated protein 1                                 | NM_025870.1      |
| 17 | Gene | Epor         | Epor           | erythropoietin receptor                                                      | NM_010149.3      |

|    |                   |                                                                       |                          |
|----|-------------------|-----------------------------------------------------------------------|--------------------------|
| 24 | Gene Zfp653       | Zfp653, Znf653 zinc finger protein 653                                | NM_177318.2              |
| 24 | Gene Gm1684       | Gm16845 predicted gene, 16845                                         | NR_040406.1, NR_040406.1 |
| 24 | Gene Ecsit        | Ecsit, Sitpec ECSIT homolog (Drosophila)                              | NM_001253897.1           |
| 22 | Gene Cnn1         | Cnnl, Cnn1, Cn calponin 1                                             | NM_009922.4              |
| 22 | Gene Elof1        | 1110011K10Ri elongation factor 1 homolog (ELF1, S. cerevisiae)        | NM_170777.3              |
| 22 | Gene Acp5         | TRACP, Acp5, acid phosphatase 5, tartrate resistant                   | NM_007388.3, NM_007388.3 |
| 31 | Gene Anln         | 2900037I21Ri anillin, actin binding protein                           | NM_028390.3              |
| 26 | Gene Rp9          | MGC144397, Fretinitis pigmentosa 9 (human)                            | NM_018739.2              |
| 26 | Gene Bbs9         | Bbs9, E130103 Bardet-Biedl syndrome 9 (human)                         | NM_178415.1, NM_178415.1 |
| 32 | Gene Herpud2      | 5031400M07R HERPUD family member 2                                    | NM_020586.2              |
| 29 | Gene Sept7        | E430034N22, Iseptin 7                                                 | NM_009859.4, NM_009859.4 |
| 39 | Gene Vps26b       | 2310075A12Ri vacuolar protein sorting 26 homolog B (yeast)            | NM_178027.4              |
| 39 | Gene Ncapd3       | Ncapd3, B130C non-SMC condensin II complex, subunit D3                | NM_178113.3              |
| 26 | Gene Snx19        | A195321, mKl sorting nexin 19                                         | NM_028874.2              |
| 20 | Gene LOC101055798 | uncharacterized LOC101055798                                          | XM_003945445.1           |
| 20 | Gene Zbtb44       | 6030404E16Ri zinc finger and BTB domain containing 44                 | NM_172765.3, NM_172765.3 |
| 17 | Gene St14         | St14, Prss14, n suppression of tumorigenicity 14 (colon carcinoma)    | NM_011176.4              |
| 36 | Gene Aplp2        | Aplp2, A17906 amyloid beta (A4) precursor-like protein 2              | NM_009691.2, NM_009691.2 |
| 23 | Gene Ets1         | MGC130355, TE26 avian leukemia oncogene 1, 5' domain                  | NM_001038642.1           |
| 30 | Gene St3gal4      | Siat4c, St3gal4 ST3 beta-galactoside alpha-2,3-sialyltransferase 4    | NM_009178.3              |
| 30 | Gene 4930581      | 4930581F22Ri RIKEN cDNA 4930581F22 gene                               | NR_029475.1              |
| 30 | Gene Dcps         | 1700001E16Ri decapping enzyme, scavenger                              | NM_027030.2              |
| 27 | Gene Foxred1      | Foxred1, Tex2: FAD-dependent oxidoreductase domain containing         | NM_172291.1              |
| 27 | Gene Srpr         | Srpr, D11Mgi2 signal recognition particle receptor ('docking protein) | NM_026130.1              |
| 27 | Gene Fam118l      | 2310022O21Ri family with sequence similarity 118, member B            | NM_194257.1, NM_194257.1 |
| 24 | Gene Pus3         | 2610020J05Ri pseudouridine synthase 3                                 | NM_023292.4              |
| 24 | Gene Hyls1        | Hyls1, 301001 hydrolethalus syndrome 1                                | NM_029762.1              |
| 24 | Gene Gm6762       | EG627480, Grr small cell adhesion glycoprotein family member          |                          |
| 18 | Gene Chek1        | Chk1, C85740, rad27, Chek1                                            | NM_007691.5              |
| 18 | Gene Stt3a        | Stt3a, Itm1, A1STT3, subunit of the oligosaccharyltransferase complex | NM_008408.4              |
| 24 | Gene Ei24         | AA536736, Ei2 etoposide induced 2.4 mRNA                              | NM_007915.5, NM_007915.5 |
| 29 | Gene Pknox2       | D230005H23R Pbx/knotted 1 homeobox 2                                  | NM_148950.2, NM_148950.2 |
| 21 | Gene Hepacan      | 2900042E01Ri hepatocyte cell adhesion molecule                        | NM_175189.4              |
| 25 | Gene Msantd2      | Msantd2, 953C Myb/SANT-like DNA-binding domain containing 2           | NM_146222.2              |
| 29 | Gene Olfr986      | Olfr986, MOR1 olfactory receptor 986                                  | NM_146615.2              |
| 29 | Gene Zfp202       | C130037E22Ri zinc finger protein 202                                  | NM_030713.2              |
| 25 | Gene Gramd1       | Gramd1b, A93 GRAM domain containing 1B                                | NM_172768.1              |
| 22 | Gene Clmp         | CLMP, ACAM, 9030425E11Ri, AW557819, ASP5, Clmp                        | NM_133733.4              |
| 30 | Gene Hspa8        | Hsc70, MGC10 heat shock protein 8                                     | NM_031165.4              |
| 30 | Gene Snord14      | Gm23107, Rnu small nucleolar RNA, C/D box 14C                         | NR_028276.1              |
| 30 | Gene Snord14      | Gm23710, Sno small nucleolar RNA, C/D box 14D                         | NR_028274.1              |
| 30 | Gene Snord14      | Snord14e small nucleolar RNA, C/D box 14E                             | NR_028275.1              |
| 26 | Gene Ubash3t      | BB125008, p7C ubiquitin associated and SH3 domain containing, B       | NM_176860.5              |
| 20 | Gene Arhgef1      | 2310014B11Ri Rho guanine nucleotide exchange factor (GEF) 12          | NM_027144.2              |
| 20 | Gene LOC101055886 | uncharacterized LOC101055886                                          | XR_168457.1, XR_168457.1 |
| 20 | Gene Tmem13       | AA396355, Tm transmembrane protein 136                                | NM_001034863.3           |
| 22 | Gene Oaf          | D9Ucla1, D13C OAF homolog (Drosophila)                                | NM_178644.3              |

|    |              |                                                                     |                  |
|----|--------------|---------------------------------------------------------------------|------------------|
| 29 | Gene Pvr1l   | AW549174, H <sub>v</sub> poliovirus receptor-related 1              | NM_021424.2      |
| 17 | Gene Thy1    | Thy1, Thy1.2, $\theta$ thymus cell antigen 1, theta                 | NM_009382.3      |
| 16 | Gene C1qtnf5 | CTRP5, C1qtnf: C1q and tumor necrosis factor related protein 5      | NM_001040631.2   |
| 16 | Gene Mfrp    | rd6, Mfrp membrane-type frizzled-related protein                    | NM_001190314.1,  |
| 16 | Gene Rnf26   | Rnf26, 803045 ring finger protein 26                                | NM_153762.3      |
| 20 | Gene Gm1068  | ENSMUSG000(predicted gene 10687                                     | XR_140937.1, XR_ |
| 20 | Gene Mcam    | CD146, s-gicer melanoma cell adhesion molecule                      | NM_023061.2      |
| 20 | Gene Cbl     | Cbl-2, 4732447 Casitas B-lineage lymphoma                           | NM_007619.2      |
| 20 | Gene Ccdc153 | Ccdc153 coiled-coil domain containing 153                           | NM_001081369.2   |
| 23 | Gene Abcg4   | 6430517004Ri ATP-binding cassette, sub-family G (WHITE), member     | NM_138955.3      |
| 23 | Gene Hinfp   | HiNF-P, DKFZp histone H4 transcription factor                       | NM_172162.3      |
| 29 | Gene C2cd2l  | 1300006023Ri C2 calcium-dependent domain containing 2-like          | NM_027909.2      |
| 43 | Gene Dpagt1  | Dpagt1, Dpagt dolichyl-phosphate (UDP-N-acetylglucosamine) acet     | NM_007875.2      |
| 43 | Gene H2afx   | H2afx, H2ax, HH2A histone family, member X                          | NM_010436.2      |
| 43 | Gene Hmbs    | Ups, PBGD, T2. hydroxymethylbilane synthase                         | NM_013551.2, NM  |
| 25 | Gene Hyou1   | Cab140, Orp1 <sup>5</sup> hypoxia up-regulated 1                    | NM_021395.4      |
| 22 | Gene Slc37a4 | G6PT, G6pt1, (solute carrier family 37 (glucose-6-phosphate transp  | NM_008063.2      |
| 22 | Gene Trappc4 | HSPC172, 150(trafficking protein particle complex 4                 | NM_021789.2      |
| 22 | Gene Rps25   | Rps25, 281000 ribosomal protein S25                                 | NM_024266.3      |
| 22 | Gene Ccdc84  | MGC106805, (coiled-coil domain containing 84                        | NM_201372.3      |
| 42 | Gene Gm1002  | ENSMUSG000(predicted gene 10023                                     | XR_140939.1      |
| 38 | Gene Ddx6    | HLR2, E230023 DEAD (Asp-Glu-Ala-Asp) box polypeptide 6              | NM_007841.4, NM  |
| 28 | Gene Phldb1  | Phldb1, LI5a, Apleckstrin homology-like domain, family B, member    | NM_153537.4      |
| 37 | Gene Arcn1   | nur17, MGC27 archain 1                                              | NM_145985.4      |
| 37 | Gene lft46   | AA408110, c11 intraflagellar transport 46                           | NM_023831.3      |
| 20 | Gene Tmem25  | AI429491, 061 transmembrane protein 25                              | NM_027865.2      |
| 20 | Gene Ttc36   | MGC37838, M tetratricopeptide repeat domain 36                      | NM_138951.1      |
| 23 | Gene Mll1    | KMT2A, Cxxc7, myeloid/lymphoid or mixed-lineage leukemia 1          | NM_001081049.1   |
| 17 | Gene 4833428 | 4833428L15Ril RIKEN cDNA 4833428L15 gene                            | NR_040732.1      |
| 17 | Gene Dscam1l | Dscam1l, 4921 Down syndrome cell adhesion molecule like 1           | NM_001081270.1   |
| 29 | Gene Rnf214  | Rnf214, D130C ring finger protein 214                               | NM_178709.4      |
| 29 | Gene Pcsk7   | Pcsk7, SPC7, A proprotein convertase subtilisin/kexin type 7        | NM_008794.2      |
| 38 | Gene Sidt2   | MGC58967, B(SID1 transmembrane family, member 2                     | NM_172257.3      |
| 42 | Gene Pafah1b | AI747451, AUC platelet-activating factor acetylhydrolase, isoform 1 | NM_008775.3      |
| 32 | Gene Sik3    | Qsk, MGC9123 SIK family kinase 3                                    | NM_027498.3      |
| 31 | Gene Apoa5   | RAP3, 1300007 apolipoprotein A-V                                    | NM_080434.3      |
| 31 | Gene Zfp259  | ZPR1, AI30378 zinc finger protein 259                               | NM_011752.2      |
| 31 | Gene Bud13   | Bud13, D0300(BUD13 homolog (yeast)                                  | NM_146000.2      |
| 17 | Gene Cadm1   | SgIGSF, RA175 cell adhesion molecule 1                              | NM_207675.2, NM  |
| 27 | Gene Usp28   | 9830148020Ri ubiquitin specific peptidase 28                        | NM_175482.3      |
| 25 | Gene Ttc12   | Ttc12, E33001 tetratricopeptide repeat domain 12                    | NM_172770.3      |
| 25 | Gene Ncam1   | NCAM-1, Ncan neural cell adhesion molecule 1                        | NM_010875.3, NM  |
| 34 | Gene Pts     | Pts, PTPS 6-pyruvoyl-tetrahydropterin synthase                      | NM_011220.2      |
| 34 | Gene Bco2    | MGC129322, E beta-carotene oxygenase 2                              | NM_133217.3      |
| 37 | Gene AU0198  | AU019823, Gn expressed sequence AU019823                            | NM_212449.2, NM  |
| 37 | Gene Pih1d2  | 2700059L22Ril PIH1 domain containing 2                              | NM_028300.2      |
| 26 | Gene Dlat    | PDC-E2, Dlat, (dihydrolipoamide S-acetyltransferase (E2 componer    | NM_145614.4      |

|    |               |                                                                     |                  |
|----|---------------|---------------------------------------------------------------------|------------------|
| 26 | Gene Dixdc1   | MGC61302, Cc DIX domain containing 1                                | NM_178118.2      |
| 21 | Gene 1110032  | 1110032A03Ri RIKEN cDNA 1110032A03 gene                             | NM_023483.3      |
| 21 | Gene Fdxacb1  | D630004A14Ri ferredoxin-fold anticodon binding domain containin     | NM_198675.2      |
| 21 | Gene Alg9     | B430313H07Ri asparagine-linked glycosylation 9 (alpha 1,2 mannos    | NM_133981.2, NR  |
| 30 | Gene Ppp2r1b  | 2410091N08Ri protein phosphatase 2 (formerly 2A), regulatory sub    | NM_001034085.1   |
| 35 | Gene Sik2     | G630080D20R salt inducible kinase 2                                 | NM_178710.3      |
| 19 | Gene Gm684    | Gm684 predicted gene 684                                            | NM_001195681.1   |
| 30 | Gene Arhgap2  | 6530403F17Ri Rho GTPase activating protein 20                       | NM_175535.3      |
| 23 | Gene Fdx1     | Fdx1                                                                | NM_007996.1      |
| 26 | Gene Rdx      | Rdx, AA51662i radixin                                               | NM_009041.3, NM  |
| 26 | Gene Zc3h12c  | A230108E06, zinc finger CCCH type containing 12C                    | NM_001162921.1   |
| 33 | Gene Exph5    | Kiaa0624, B13i exophilin 5                                          | NM_176846.3      |
| 33 | Gene Kdelc2   | AW549401, KcKDEL (Lys-Asp-Glu-Leu) containing 2                     | NM_212445.2      |
| 17 | Gene Atm      | C030026E19Ri ataxia telangiectasia mutated homolog (human)          | NM_007499.2      |
| 17 | Gene Npat     | 6820401K01, E nuclear protein in the AT region                      | NM_001081152.1   |
| 28 | Gene Acat1    | Acat, Acat1, 6i acetyl-Coenzyme A acetyltransferase 1               | NM_144784.3      |
| 44 | Gene Cul5     | C030032G03Ri cullin 5                                               | NM_027807.3, NM  |
| 18 | Gene Tnfaip8l | 9930029P06Ri tumor necrosis factor, alpha-induced protein 8-like    | NM_001033535.3   |
| 21 | Gene Dmxl2    | mKIAA0856, D Dmx-like 2                                             | NM_172771.2      |
| 23 | Gene Dnaja4   | Hsj4, Dj4, 111i DnaJ (Hsp40) homolog, subfamily A, member 4         | NM_021422.4      |
| 25 | Gene Ireb2    | DKFZp564D11i iron responsive element binding protein 2              | NM_022655.3      |
| 19 | Gene Agphd1   | C630028N24Ri aminoglycoside phosphotransferase domain contain       | NM_177351.4      |
| 19 | Gene AY07488  | Mcpr1, AY074i cDNA sequence AY074887                                | NM_145229.2      |
| 19 | Gene PsmA4    | C9, PsmA4 proteasome (prosome, macropain) subunit, alpha ty         | NM_011966.3      |
| 23 | Gene Chrna3   | A730007P14Ri cholinergic receptor, nicotinic, alpha polypeptide 3   | NM_145129.2      |
| 23 | Gene ChrnB4   | Acrb-4, Acrb4, cholinergic receptor, nicotinic, beta polypeptide 4  | NM_148944.4      |
| 34 | Gene Ube2q2   | 3010021M21R ubiquitin-conjugating enzyme E2Q (putative) 2           | NM_180600.3      |
| 34 | Gene Fbxo22   | 1600016C16Ri F-box protein 22                                       | NM_028049.2      |
| 23 | Gene Etfa     | Etfa, D9ErtD39 electron transferring flavoprotein, alpha polypeptid | NM_145615.4      |
| 21 | Gene Isl2     | 3110001N10Ri insulin related protein 2 (islet 2)                    | NM_027397.3      |
| 21 | Gene Scaper   | C430017I08, DS phase cyclin A-associated protein in the ER          | NM_001081341.1   |
| 20 | Gene Rcn2     | AA408742, Rcr reticulocalbin 2                                      | NM_011992.2      |
| 26 | Gene Tspan3   | TM4-A, 17000i tetraspanin 3                                         | NM_019793.3      |
| 20 | Gene Lingo1   | LINGO-1, 4930 leucine rich repeat and Ig domain containing 1        | NM_181074.4      |
| 21 | Gene Cspg4    | 4732461B14Ri chondroitin sulfate proteoglycan 4                     | NM_139001.2      |
| 36 | Gene Snx33    | Snx33, Sh3px3 sorting nexin 33                                      | NM_175483.5      |
| 36 | Gene Imp3     | AI256594, 119 IMP3, U3 small nucleolar ribonucleoprotein, homolc    | NM_133976.2      |
| 32 | Gene Ptpn9    | Ptpn9, MEG2 protein tyrosine phosphatase, non-receptor type 9       | NM_019651.2      |
| 32 | Gene Gm1065   | ENSMUSG000i predicted gene 10658                                    | NR_045886.1      |
| 35 | Gene Sin3a    | KIAA4126, AW transcriptional regulator, SIN3A (yeast)               | NM_011378.2, NM  |
| 32 | Gene 2700012  | 2700012I20Ri RIKEN cDNA 2700012I20 gene                             | XR_108091.2, XR_ |
| 35 | Gene 2410133  | 2410133F24Ri RIKEN cDNA 2410133F24 gene                             | XR_108090.1, XR_ |
| 35 | Gene Man2c1   | Man2c1, 1110i mannosidase, alpha, class 2C, member 1                | NM_028636.2      |
| 22 | Gene Trcg1    | Trcg1                                                               | NM_001014398.2   |
| 36 | Gene 1700017  | MGC144191, RIKEN cDNA 1700017B05 gene                               | NM_028820.2      |
| 28 | Gene Rpp25    | Rpp25, AI8511 ribonuclease P/MRP 25 subunit                         | NM_133982.1      |
| 37 | Gene Cox5a    | CcOX, AA9597i cytochrome c oxidase subunit Va                       | NM_007747.2      |



|    |              |                                                                     |                  |
|----|--------------|---------------------------------------------------------------------|------------------|
| 30 | Gene Fam219l | AI594866, 231 family with sequence similarity 219, member B         | NM_175273.4, NM  |
| 30 | Gene Mpi     | 1110002E17Ri mannose phosphate isomerase                            | NM_025837.2      |
| 33 | Gene Scamp2  | Scamp2, Sc2, A secretory carrier membrane protein 2                 | NM_022813.3      |
| 33 | Gene Ulk3    | Ulk3, 1200015E14Rik                                                 | NM_027895.1      |
| 33 | Gene Cplx3   | Cplx3, Lamn1l, complexin 3                                          | NM_146223.3      |
| 27 | Gene Csk     | AW212630, Cs c-src tyrosine kinase                                  | NM_007783.2      |
| 34 | Gene Clk3    | MGC36552, Cl CDC-like kinase 3                                      | NM_007713.4      |
| 40 | Gene Ubl7    | 2300004C15Ri ubiquitin-like 7 (bone marrow stromal cell-derived)    | NM_027086.3, NM  |
| 40 | Gene Sema7a  | Sema7a, M-Se sema domain, immunoglobulin domain (Ig), and GPI       | NM_011352.2      |
| 26 | Gene Stra6   | Stra6, AI89193 stimulated by retinoic acid gene 6                   | NM_009291.2, NM  |
| 26 | Gene Islr    | Islr, AW55314i immunoglobulin superfamily containing leucine-rich   | NM_012043.4, NM  |
| 26 | Gene Islr2   | B930052A04Ri immunoglobulin superfamily containing leucine-rich     | NM_001161535.1   |
| 30 | Gene Loxl1   | Loxl1, Loxl, MCl lysyl oxidase-like 1                               | NM_010729.3      |
| 22 | Gene 6030419 | 6030419C18Ri RIKEN cDNA 6030419C18 gene                             | NM_176921.3      |
| 15 | Gene Cd276   | Cd276, B7h3, A CD276 antigen                                        | NM_133983.4      |
| 18 | Gene Hcn4    | Hcn4, Bcng3, A hyperpolarization-activated, cyclic nucleotide-gated | NM_001081192.1   |
| 24 | Gene Neo1    | Neo1, 261002i neogenin                                              | NM_008684.2, NM  |
| 41 | Gene Arih1   | AU021774, Ari ariadne ubiquitin-conjugating enzyme E2 binding pr    | NM_019927.2      |
| 41 | Gene Gm2019  | Gm20199 predicted gene, 20199                                       | NR_045640.1      |
| 34 | Gene Hexa    | Hexa, Hex-1 hexosaminidase A                                        | NM_010421.4      |
| 31 | Gene Parp6   | 1700119G14Ri poly (ADP-ribose) polymerase family, member 6          | NM_001205239.1   |
| 31 | Gene Pkm     | AA414905, Pk- pyruvate kinase, muscle                               | NM_001253883.1   |
| 27 | Gene Gm1065  | ENSMUSG000i predicted gene 10655                                    | XR_140945.1, XR_ |
| 27 | Gene Tle3    | 2610103N05Ri transducin-like enhancer of split 3, homolog of Dros   | NM_001083928.1   |
| 45 | Gene Rplp1   | Arpp1, MGC10 ribosomal protein, large, P1                           | NM_018853.3      |
| 45 | Gene Kif23   | Knsl5, MKLP-1, kinesin family member 23                             | NM_024245.4      |
| 30 | Gene Paqr5   | BB115488, mP progesterin and adipoQ receptor family member V        | NM_028748.2      |
| 25 | Gene Mir5133 | mu-mir-5133, microRNA 5133                                          | NR_039595.1      |
| 27 | Gene Anp32a  | Anp32, LANP, A acidic (leucine-rich) nuclear phosphoprotein 32 fami | NM_009672.3      |
| 32 | Gene Fem1b   | Fem1b, mKIAA feminization 1 homolog b (C. elegans)                  | NM_010193.4      |
| 24 | Gene Pias1   | Ddxbp1, Pias1, protein inhibitor of activated STAT 1                | NM_019663.3      |
| 17 | Gene Skor1   | Skor1, Corl1, CSKI family transcriptional corepressor 1             | NM_172446.3, NM  |
| 26 | Gene Iqch    | 4921504K03Ri IQ motif containing H                                  | NM_030068.1      |
| 26 | Gene Aagab   | p34, Aagab, A alpha- and gamma-adaptin binding protein              | NM_025857.2      |
| 27 | Gene Smad3   | AU022421, Smad3, Madh3                                              | NM_016769.4      |
| 40 | Gene Smad6   | Smad6, Madh6                                                        | NM_008542.3      |
| 25 | Gene Zwilch  | Zwilch, 23100i zwilch kinetochore protein                           | NM_026507.4      |
| 25 | Gene Rpl4    | 2010004J23Ri ribosomal protein L4                                   | NM_024212.4      |
| 25 | Gene Snord16 | Snord16a, MBI small nucleolar RNA, C/D box 16A                      | NR_028548.1      |
| 25 | Gene Snapc5  | Snapc5, 20101 small nuclear RNA activating complex, polypeptide 5   | NM_183316.2      |
| 30 | Gene Map2k1  | Map2k1, Prkm mitogen-activated protein kinase kinase 1              | NM_008927.3      |
| 27 | Gene Tipin   | 1110005A05Ri timeless interacting protein                           | NM_025372.3      |
| 30 | Gene Dis3l   | Dis3l, AV3403i DIS3 mitotic control homolog (S. cerevisiae)-like    | NM_001001295.2,  |
| 33 | Gene Rab11a  | Rab11a RAB11a, member RAS oncogene family                           | NM_017382.5      |
| 25 | Gene Dennd4a | Dennd4a, MGC DENN/MADD domain containing 4A                         | NM_001162917.1   |
| 39 | Gene Ptplad1 | Ptplad1, Hspc1 protein tyrosine phosphatase-like A domain contain   | NM_021345.2      |
| 29 | Gene Igdcc4  | WI-16786, DDI immunoglobulin superfamily, DCC subclass, membe       | NM_020043.2      |

|    |                   |                                                                              |                  |
|----|-------------------|------------------------------------------------------------------------------|------------------|
| 29 | Gene Igdcc3       | Igdcc3, Punc, A immunoglobulin superfamily, DCC subclass, member             | NM_008988.2      |
| 26 | Gene Parp16       | C79952, MGC6 poly (ADP-ribose) polymerase family, member 16                  | NM_177460.4      |
| 27 | Gene Clpx         | Clpx, E330029I caseinolytic peptidase X (E.coli)                             | NM_001044389.1   |
| 25 | Gene Pdcd7        | ES18, Pdcd7, C programmed cell death 7                                       | NM_016688.2      |
| 29 | Gene Kbtbd13      | 5430433E21Ri kelch repeat and BTB (POZ) domain containing 13                 | NM_028974.1      |
| 29 | Gene Rasl12       | Rasl12, 46314I RAS-like, family 12                                           | NM_001033158.2   |
| 28 | Gene Mtfmt        | 2310020P08Ri mitochondrial methionyl-tRNA formyltransferase                  | NM_027134.3      |
| 32 | Gene Plekho2      | MGC30448, Pl pleckstrin homology domain containing, family O member          | NM_153119.2      |
| 32 | Gene Pif1         | 4631410M14, PIF1 5'-to-3' DNA helicase homolog (S. cerevisiae)               | NM_172453.3      |
| 30 | Gene Rbpms2       | 2400008B06Ri RNA binding protein with multiple splicing 2                    | NM_028030.3      |
| 20 | Gene Trip4        | ASC-1, Trip4, 4 thyroid hormone receptor interactor 4                        | NM_001170907.1   |
| 20 | Gene 2810417      | AA409629, 28: RIKEN cDNA 2810417H13 gene                                     | NM_026515.2      |
| 20 | Gene Csnk1g1      | 9130020E21Ri casein kinase 1, gamma 1                                        | NM_173185.2      |
| 31 | Gene Ppib         | Cphn-2, Cphn2 peptidylprolyl isomerase B                                     | NM_011149.2      |
| 31 | Gene Snx22        | Snx22, Gm112 sorting nexin 22                                                | NM_001025612.2   |
| 26 | Gene Herc1        | MGC7618, 281 hect (homologous to the E6-AP (UBE3A) carboxyl terminus)        | NM_145617.3      |
| 29 | Gene Usp3         | AA409661, Us1 ubiquitin specific peptidase 3                                 | NM_144937.3      |
| 32 | Gene Rps27l       | 1810034D23Ri ribosomal protein S27-like                                      | NM_026467.3      |
| 32 | Gene Lactb        | Lactb, Mrpl56, lactamase, beta                                               | NM_030717.1      |
| 30 | Gene Tpm1         | Tpm1, alpha-T tropomyosin 1, alpha                                           | NM_024427.4, NM  |
| 21 | Gene C2cd4a       | C2cd4a, EG24 C2 calcium-dependent domain containing 4A                       | NM_001163143.1   |
| 21 | Gene Vps13c       | Vps13c, W516 vacuolar protein sorting 13C (yeast)                            | NM_177184.3      |
| 28 | Gene Rora         | 9530021D13Ri RAR-related orphan receptor alpha                               | NM_013646.1      |
| 21 | Gene LOC100502669 | uncharacterized LOC100502669                                                 | XR_108116.1, XR_ |
| 20 | Gene Gm4978       | Gm4978, EG24 ribosomal protein L7A pseudogene                                |                  |
| 20 | Gene Anxa2        | Cal1h, Anxa2, annexin A2                                                     | NM_007585.3      |
| 20 | Gene Mir3109      | Mir3109, mmu microRNA 3109                                                   | NR_037296.1      |
| 21 | Gene Foxb1        | C43, Foxb1, Fox forkhead box B1                                              | NM_022378.3      |
| 21 | Gene B230323      | B230323A14Ri RIKEN cDNA B230323A14 gene                                      | NR_040765.1      |
| 24 | Gene Bnip2        | Bnip2, BNIP2b, BCL2/adenovirus E1B interacting protein 2                     | NM_001008238.2   |
| 22 | Gene Gtf2a2       | Tfii2, Tflig, Gt general transcription factor II A, 2                        | NM_001039519.1   |
| 44 | Gene Ccnb2        | CycB2, Ccnb2 cyclin B2                                                       | NM_007630.2      |
| 44 | Gene Rnf111       | ARK, Rnf111, R ring finger 111                                               | NM_033604.2      |
| 28 | Gene Sltm         | 5730455C01Ri SAFB-like, transcription modulator                              | NM_026337.1, NM  |
| 32 | Gene Fam63b       | KIAA1164, A14 family with sequence similarity 63, member B                   | NM_172772.2      |
| 24 | Gene Adam10       | kuzbanian, kuz a disintegrin and metallopeptidase domain 10                  | NM_007399.3      |
| 21 | Gene Aldh1a2      | Aldh1a2, Rald1 aldehyde dehydrogenase family 1, subfamily A2                 | NM_009022.4      |
| 31 | Gene Polr2m       | D9Wsu138e, A polymerase (RNA) II (DNA directed) polypeptide M                | NM_178602.3, NM  |
| 23 | Gene Cgnl1        | 4933421H10Ri cingulin-like 1                                                 | NM_026599.4      |
| 32 | Gene Tcf12        | HEB, ALF1, Tcf transcription factor 12                                       | NM_011544.3, NM  |
| 28 | Gene 4930509      | 4930509E16Ri RIKEN cDNA 4930509E16 gene                                      | NR_045735.1      |
| 28 | Gene Rfx7         | Rfx7, 9930116 regulatory factor X, 7                                         | NM_001033536.1   |
| 25 | Gene Nedd4        | Nedd4a, E430I neural precursor cell expressed, developmentally downregulated | NM_010890.3      |
| 25 | Gene Prtg         | Igdcc5, A2300I protogenin homolog (Gallus gallus)                            | NM_175485.4      |
| 25 | Gene Pygo1        | 2600014C22Ri pygopus 1                                                       | NM_028116.2      |
| 28 | Gene Khdc3        | 2410004A20Ri KH domain containing 3, subcortical maternal complex            | NM_025890.3      |
| 28 | Gene Rsl24d1      | MGC6735, 241 ribosomal L24 domain containing 1                               | NM_198609.2      |

|    |               |                 |                                                       |                  |
|----|---------------|-----------------|-------------------------------------------------------|------------------|
| 23 | Gene Gm1655   | Gm16551         | predicted gene 16551                                  | NR_045284.1      |
| 23 | Gene Onecut1  | Onecut1, Hnf6   | one cut domain, family member 1                       | NM_008262.3      |
| 26 | Gene Gm2981   | Gm2981          | apoptosis inhibitor 5 pseudogene                      |                  |
| 26 | Gene Myo5a    | MVa, Myo5, D    | myosin VA                                             | NM_010864.2      |
| 30 | Gene Myo5c    | 9130003O20Ri    | myosin VC                                             | NM_001081322.1   |
| 30 | Gene Gnb5     | Gnb5, flr, GBS, | guanine nucleotide binding protein (G protein), beta  | NM_010313.1, NM  |
| 22 | Gene Mapk6    | Prkm4, Mapk4    | mitogen-activated protein kinase 6                    | NM_027418.1, NM  |
| 22 | Gene 4933433  | 4933433G15Ri    | RIKEN cDNA 4933433G15 gene                            | NR_040719.1      |
| 36 | Gene Tmod3    | UTMOD, Tmoc     | tropomodulin 3                                        | NM_016963.2      |
| 36 | Gene Tmod2    | N-Tmod, Tmoc    | tropomodulin 2                                        | NM_001038710.1   |
| 23 | Gene Lysmd2   | AW538442, Ly    | LysM, putative peptidoglycan-binding, domain cont     | NM_027309.2      |
| 21 | Gene Lrrc1    | AU016091, mK    | leucine rich repeat containing 1                      | NM_172528.3, NM  |
| 21 | Gene Gm1956   | Gm19569         | predicted gene, 19569                                 | XR_108127.2, XR_ |
| 21 | Gene Gclc     | Gclc, Glclc, GL | glutamate-cysteine ligase, catalytic subunit          | NM_010295.2      |
| 27 | Gene Elovl5   | AI747313, Elovl | ELOVL family member 5, elongation of long chain fa    | NM_134255.3      |
| 32 | Gene Fbxo9    | AA986398, 90:   | f-box protein 9                                       | NM_023605.2, NM  |
| 32 | Gene Ick      | AI848300, 221   | intestinal cell kinase                                | NM_019987.2, NM  |
| 26 | Gene Mb21d1   | Mb21d1, m-cC    | Mab-21 domain containing 1                            | NM_173386.4      |
| 50 | Gene Mto1     | 2310039H01Ri    | mitochondrial translation optimization 1 homolog (S   | NM_026658.2      |
| 50 | Gene Eef1a1   | Eef1a1, MGC1:   | eukaryotic translation elongation factor 1 alpha 1    | NM_010106.2      |
| 19 | Gene Slc17a5  | SIALIN, Slc17a: | solute carrier family 17 (anion/sugar transporter), m | NM_172773.2      |
| 28 | Gene Senp6    | mKIAA0797, 2:   | SUMO/sentrin specific peptidase 6                     | NM_146003.2      |
| 18 | Gene Htr1b    | Htr1b           | 5-hydroxytryptamine (serotonin) receptor 1B           | NM_010482.1      |
| 18 | Gene D430036  | D430036J16Ri    | RIKEN cDNA D430036J16 gene                            | NR_040393.1, NR_ |
| 26 | Gene Irak1bp1 | SIMPL, Aip70,   | interleukin-1 receptor-associated kinase 1 binding p  | NM_022986.4, NM  |
| 35 | Gene Phip     | 4632404O06Ri    | pleckstrin homology domain interacting protein        | NM_001081216.1   |
| 18 | Gene Hmgn3    | 6330514M13R     | high mobility group nucleosomal binding domain 3      | NM_026122.4, NM  |
| 28 | Gene Sh3bgrl2 | AA408038, A9:   | SH3 domain binding glutamic acid-rich protein like 2  | NM_172507.5      |
| 22 | Gene Elovl4   | Elovl4          | elongation of very long chain fatty acids (FEN1/Elo2, | NM_148941.2      |
| 35 | Gene Ttk      | Esk1, PYT, ALO. | Ttk protein kinase                                    | NM_009445.2, NM  |
| 27 | Gene Ibtik    | Ibtik, mKIAA14  | inhibitor of Bruton agammaglobulinemia tyrosine ki    | NM_001081282.2   |
| 22 | Gene 9330154  | 9330154J02Ri    | RIKEN cDNA 9330154J02 gene                            | XR_035199.1, XR_ |
| 22 | Gene Tpbg     | AW495680, 5T    | trophoblast glycoprotein                              | NM_001164792.1   |
| 32 | Gene Ube2cbp  | 2610018I03Ri    | ubiquitin-conjugating enzyme E2C binding protein      | NM_027394.2      |
| 32 | Gene Dopey1   | C130028L17, E   | dopey family member 1                                 | NM_177208.3      |
| 20 | Gene Pgm3     | Agm1, PAGM,     | phosphoglucomutase 3                                  | NM_028352.4, NM  |
| 20 | Gene Rwdd2a   | MGC144625, FRWD | domain containing 2A                                  | NM_027100.2, NM  |
| 31 | Gene Me1      | D9Ert267e, N    | malic enzyme 1, NADP(+)-dependent, cytosolic          | NM_008615.2, NM  |
| 31 | Gene A330041  | A330041J22Ri    | RIKEN cDNA A330041J22 gene                            | NR_045835.1      |
| 19 | Gene Snap91   | 91kDa, mKIAA    | synaptosomal-associated protein 91                    | NM_013669.1      |
| 25 | Gene 4922501  | 4922501C03Ri    | RIKEN cDNA 4922501C03 gene                            | NM_199316.2      |
| 16 | Gene Nt5e     | NT, AI447961,   | 5' nucleotidase, ecto                                 | NM_011851.4      |
| 29 | Gene Snx14    | Snx14, C33003   | sorting nexin 14                                      | NM_172926.3      |
| 44 | Gene Syncrip  | Syncrip, 46324  | synaptotagmin binding, cytoplasmic RNA interacting    | NM_019796.4, NM  |
| 21 | Gene Adamts7  | ADAMTS7B, Aca   | disintegrin-like and metallopeptidase (reprolysin t   | NM_001003911.2   |
| 18 | Gene Plscr4   | Plscr4, AV245   | phospholipid scramblase 4                             | NM_178711.3      |
| 25 | Gene B430319  | D530025C14Ri    | RIKEN cDNA B430319G15 gene                            | NR_029474.1      |

|    |               |                                                                      |                  |
|----|---------------|----------------------------------------------------------------------|------------------|
| 25 | Gene Plod2    | D530025C14Ri procollagen lysine, 2-oxoglutarate 5-dioxygenase 2      | NM_011961.3, NM  |
| 33 | Gene 1190002  | 1190002N15Ri RIKEN cDNA 1190002N15 gene                              | NM_001033145.2   |
| 20 | Gene Chst2    | AW121776, G $\beta$ carbohydrate sulfotransferase 2                  | NM_018763.2      |
| 28 | Gene U2surp   | 2610101N10Ri U2 snRNP-associated SURP domain containing              | NM_026476.2, NM  |
| 31 | Gene 1700065  | 1700065D16Ri RIKEN cDNA 1700065D16 gene                              | NM_028533.2      |
| 31 | Gene Atr      | Atr                                                                  | NM_019864.1      |
| 27 | Gene Rnf7     | Rnf7, SAG, Rbx ring finger protein 7                                 | NM_011279.2      |
| 27 | Gene Rasa2    | AU023900, Ra: RAS p21 protein activator 2                            | NM_053268.2      |
| 22 | Gene Acpl2    | DKFZp434B21: acid phosphatase-like 2                                 | NM_153420.2      |
| 18 | Gene Spsb4    | Spsb4, SSB-4, I splA/ryanodine receptor domain and SOCS box cont     | NM_145134.3      |
| 18 | Gene Gm1601   | Gm16010, OT1 predicted gene 16010                                    | XR_108152.1, XR_ |
| 36 | Gene Slc25a36 | Slc25a36, C33( solute carrier family 25, member 36                   | NM_138756.4      |
| 26 | Gene Nmnat3   | 4933408N02Ri nicotinamide nucleotide adenylyltransferase 3           | NM_144533.2      |
| 24 | Gene Mrps22   | Rpms22, Mrps mitochondrial ribosomal protein S22                     | NM_025485.3      |
| 28 | Gene Foxl2os  | Foxl2os, ENSM forkhead box L2 opposite strand transcript             | NR_003248.3      |
| 28 | Gene Foxl2    | Foxl2, Pfrk, BP forkhead box L2                                      | NM_012020.2      |
| 27 | Gene Gm6432   | Gm6432, EG62 predicted gene 6432                                     | NM_001244762.1   |
| 27 | Gene Cep70    | Bite, Cep70, C( centrosomal protein 70                               | NM_023873.3      |
| 17 | Gene Esyt3    | mKIAA4186, F $\beta$ extended synaptotagmin-like protein 3           | NM_177775.3      |
| 20 | Gene Mras     | Mras, AI32625 muscle and microspikes RAS                             | NM_008624.3      |
| 42 | Gene Armc8    | Armc8, HSPC0: armadillo repeat containing 8                          | NM_028768.3, NM  |
| 42 | Gene Dbr1     | Dbr1, AW0184 debranching enzyme homolog 1 ( <i>S. cerevisiae</i> )   | NM_031403.3      |
| 21 | Gene A4gnt    | A4gnt, Gm798 alpha-1,4-N-acetylglucosaminyltransferase               | NM_001077424.2   |
| 21 | Gene Dzip1l   | Dzip1l, AI6639 DAZ interacting protein 1-like                        | NM_028258.3      |
| 17 | Gene Sox14    | Sox14 SRY-box containing gene 14                                     | NM_011440.1      |
| 17 | Gene Slc35g2  | Gm519, Slc35g solute carrier family 35, member G2                    | NM_001101483.1   |
| 25 | Gene Stag1    | Stag1, SA-1, Sc stromal antigen 1                                    | NM_009282.3      |
| 28 | Gene Pccb     | AI314687, 130 propionyl Coenzyme A carboxylase, beta polypeptid      | NM_025835.2      |
| 40 | Gene Msl2     | Msl211, E1301( male-specific lethal 2 homolog ( <i>Drosophila</i> )  | NM_001100451.1   |
| 22 | Gene Ppp2r3a  | 3222402P14Ri protein phosphatase 2, regulatory subunit B", alpha     | NM_001161362.3,  |
| 53 | Gene Amotl2   | Amotl2, Lccp, ( angiominin-like 2                                    | NM_019764.2      |
| 30 | Gene Ryk      | Vik, Ryk, AW5: receptor-like tyrosine kinase                         | NM_013649.3, NM  |
| 20 | Gene Topbp1   | D430026L04Ri topoisomerase (DNA) II binding protein 1                | NM_176979.5      |
| 28 | Gene Cdv3     | C79446, TPP3( carnitine deficiency-associated gene expressed in ve   | NM_175565.3, NM  |
| 33 | Gene Uba5     | AW240750, U $\beta$ ubiquitin-like modifier activating enzyme 5      | NM_025692.3      |
| 33 | Gene Acad11   | 5730439E10Ri acyl-Coenzyme A dehydrogenase family, member 11         | NM_175324.3      |
| 23 | Gene Dnajc13  | RME-8, Rme8, DnaJ (Hsp40) homolog, subfamily C, member 13            | NM_001163026.1   |
| 32 | Gene Nudt16   | AI851783, 231 nudix (nucleoside diphosphate linked moiety X)-type    | NM_029385.2      |
| 23 | Gene Atp2c1   | pmr1, BCPM, 1ATPase, Ca <sup>++</sup> -sequestering                  | NM_001253831.1   |
| 31 | Gene Wdr82    | CDW5/WDR82 WD repeat domain containing 82                            | NM_029896.1      |
| 31 | Gene Mirlet7g | Mirlet7g, Mirn microRNA let7g                                        | NR_029526.1      |
| 24 | Gene Poc1a    | 2510040D07Ri POC1 centriolar protein homolog A ( <i>Chlamydomona</i> | NM_027354.2      |
| 42 | Gene Dusp7    | Pyst2, Dusp7, , dual specificity phosphatase 7                       | NM_153459.4      |
| 44 | Gene Rpl29    | MGC107574, Ribosomal protein L29                                     | NM_009082.2      |
| 44 | Gene Acy1     | Acy1, 1110014 aminoacylase 1                                         | NM_025371.2      |
| 44 | Gene Abhd14a  | AW558221, Dc abhydrolase domain containing 14A                       | NM_001110271.1   |
| 25 | Gene Pcbp4    | Pcbp4, AlphaC poly(rC) binding protein 4                             | NM_021567.5      |

|    |              |                                                                    |                  |
|----|--------------|--------------------------------------------------------------------|------------------|
| 25 | Gene Gpr62   | Gpr62, 49334C G protein-coupled receptor 62                        | NM_001159652.1   |
| 25 | Gene Parp3   | AW990611, PA poly (ADP-ribose) polymerase family, member 3         | NM_145619.2      |
| 20 | Gene Rrp9    | D9Wsu10e, MR RRP9, small subunit (SSU) processome component, I     | NM_145620.4      |
| 33 | Gene Tex264  | Tex264, TEG-2 testis expressed gene 264                            | NM_001081654.1   |
| 33 | Gene Rad54l2 | Rad54l2, G630 RAD54 like 2 (S. cerevisiae)                         | NM_030730.2      |
| 30 | Gene Vprbp   | mKIAA0800, A Vpr (HIV-1) binding protein                           | NM_001015507.2   |
| 36 | Gene Rbm15b  | Rbm15b, 1810 RNA binding motif protein 15B                         | NM_175402.4      |
| 36 | Gene Manf    | D18Mgi17, D1 mesencephalic astrocyte-derived neurotrophic fact     | NM_029103.3      |
| 36 | Gene Dock3   | PBP, MOCA, mdedicator of cyto-kinesis 3                            | NM_153413.2      |
| 34 | Gene Cacna2d | Cacna2d2, tor calcium channel, voltage-dependent, alpha 2/delta s  | NM_020263.3, NM  |
| 34 | Gene Tmem11  | Tmem115, Pp transmembrane protein 115                              | NM_019704.2      |
| 34 | Gene Cyb561d | Cyb561d2, Tsp cytochrome b-561 domain containing 2                 | NM_019720.4      |
| 34 | Gene Nprl2   | NPR2L, 28104 nitrogen permease regulator-like 2                    | NM_018879.2      |
| 24 | Gene Zmynd1  | Blu, Zmynd10 zinc finger, MYND domain containing 10                | NM_053253.3      |
| 24 | Gene Rassf1  | 123F2, Rassf1, Ras association (RalGDS/AF-6) domain family memb    | NM_001243748.1,  |
| 24 | Gene Gm9917  | Gm9917, ENSM predicted gene 9917                                   | XR_168462.1, XR_ |
| 24 | Gene Tusc2   | Tusc2, PAP, Pd tumor suppressor candidate 2                        | NM_019742.4      |
| 24 | Gene Hyal2   | AI256841, Hya hyaluronoglucosaminidase 2                           | NM_010489.2      |
| 24 | Gene Hyal1   | Hya1, Hyal1, H hyaluronoglucosaminidase 1                          | NM_008317.4      |
| 25 | Gene Gnai2   | Gia, C76432, Gguanine nucleotide binding protein (G protein), alph | NM_008138.4      |
| 25 | Gene Gm1972  | Gm19721 predicted gene, 19721                                      | XR_168463.1      |
| 21 | Gene Sema3f  | Sema4, Semak sema domain, immunoglobulin domain (Ig), short ba     | NM_011349.3      |
| 25 | Gene Rbm5    | D030069N10R RNA binding motif protein 5                            | NM_148930.3      |
| 27 | Gene Rbm6    | g16, NY-LU-12, RNA binding motif protein 6                         | NM_029169.3, NM  |
| 22 | Gene Mon1a   | 2810468K17Ri MON1 homolog A (yeast)                                | NM_028369.3      |
| 22 | Gene Mst1r   | Mst1r, CDw13 macrophage stimulating 1 receptor (c-met-related t    | NM_009074.2      |
| 33 | Gene Uba7    | MGC144384, Ubiquitin-like modifier activating enzyme 7             | NM_023738.4      |
| 33 | Gene Fam212i | Inka1, 623042 family with sequence similarity 212, member A        | NM_026597.3      |
| 33 | Gene Cdhr4   | MGC144384, C cadherin-related family member 4                      | XM_003688869.1,  |
| 29 | Gene Ip6k1   | Ip6k1, InsP6, I inositol hexaphosphate kinase 1                    | NM_013785.2      |
| 32 | Gene Rnf123  | Kpc1, BC00394 ring finger protein 123                              | NM_032543.2      |
| 32 | Gene Mst1    | Hgfl, D9H3F15 macrophage stimulating 1 (hepatocyte growth facto    | NM_008243.3      |
| 32 | Gene Apeh    | Apeh, MGC381 acylpeptide hydrolase                                 | NM_146226.2      |
| 26 | Gene Bsn     | Bsn                                                                | NM_007567.2      |
| 36 | Gene Dag1    | D9Wsu13e, D dystroglycan 1                                         | NM_010017.3      |
| 36 | Gene Rhoa    | Arha1, Rhoa, A ras homolog gene family, member A                   | NM_016802.4      |
| 36 | Gene Gpx1    | Gpx1, GPx-1, C glutathione peroxidase 1                            | NM_008160.6      |
| 36 | Gene Usp4    | F730026I20Rik ubiquitin specific peptidase 4 (proto-oncogene)      | NM_011678.2      |
| 16 | Gene BC04856 | MGC58561, BC cDNA sequence BC048562                                | NM_001004192.1   |
| 27 | Gene Klhdc8b | 4931406O17Ri kelch domain containing 8B                            | NM_030075.2      |
| 27 | Gene Ccdc71  | Ccdc71, 26000 coiled-coil domain containing 71                     | NM_133744.4      |
| 26 | Gene Lamb2   | Lamb2, Lamb- laminin, beta 2                                       | NM_008483.3      |
| 26 | Gene Usp19   | Zmynd9, AI047 ubiquitin specific peptidase 19                      | NM_001168371.2   |
| 24 | Gene Qars    | 1110018N24Ri glutaminyl-tRNA synthetase                            | NM_133794.2, NM  |
| 30 | Gene Qrich1  | Qrich1, 26100 glutamine-rich 1                                     | NM_175143.5, NM  |
| 30 | Gene Impdh2  | Impdh2, IMPD inosine 5'-phosphate dehydrogenase 2                  | NM_011830.3      |
| 30 | Gene Ndufaf3 | 4733401H18Ri NADH dehydrogenase (ubiquinone) 1 alpha subcom        | NM_023247.1      |

|    |               |                                                                     |                  |
|----|---------------|---------------------------------------------------------------------|------------------|
| 30 | Gene Mir191   | mmu-mir-191, microRNA 191                                           | NR_029577.1      |
| 30 | Gene Mir425   | mmu-mir-425, microRNA 425                                           | NR_029947.1      |
| 30 | Gene Dalrd3   | Dalrd3, 63305: DALR anticodon binding domain containing 3           | NM_026378.3      |
| 30 | Gene Wdr6     | Wdr6, mWDR6                                                         | NM_031392.2      |
| 30 | Gene P4htm    | MGC130597, 4prolyl 4-hydroxylase, transmembrane (endoplasmic        | NM_028944.3      |
| 30 | Gene Arih2    | ARI2, AI84354: ariadne homolog 2 (Drosophila)                       | NM_011790.4      |
| 28 | Gene Slc25a2c | C78826, 1110C solute carrier family 25 (mitochondrial carnitine/acy | NM_020520.4      |
| 28 | Gene Prkar2a  | Prkar2a, RII(alp protein kinase, cAMP dependent regulatory, type II | NM_008924.2      |
| 26 | Gene Nckipsd  | WISH, DIP1, WNCK interacting protein with SH3 domain                | NM_030729.4      |
| 26 | Gene Celsr3   | flamingo, Celsr cadherin, EGF LAG seven-pass G-type receptor 3 (fla | NM_080437.2      |
| 20 | Gene Slc26a6  | Slc26a6, B930C solute carrier family 26, member 6                   | NM_134420.4      |
| 26 | Gene Uqcrc1   | 1110032G10Ri ubiquinol-cytochrome c reductase core protein 1        | NM_025407.2      |
| 41 | Gene Ccdc51   | MGC151163, A coiled-coil domain containing 51                       | NM_025689.4      |
| 41 | Gene Gm7628   | Gm7628, EG6C predicted gene 7628                                    | XM_976757.3      |
| 41 | Gene Plxnb1   | 2900002G15Ri plexin B1                                              | NM_172775.2      |
| 27 | Gene Cdc25a   | Cdc25a, D9Ertd393e                                                  | NM_007658.3      |
| 32 | Gene Dhx30    | Ddx30, C1300E DEAH (Asp-Glu-Ala-His) box polypeptide 30             | NM_001252682.1   |
| 32 | Gene Gm1061   | ENSMUSG000C predicted gene 10615                                    | XR_140969.1, XR_ |
| 26 | Gene Smarcc1  | SRG3, Rsc8, AI SWI/SNF related, matrix associated, actin dependen   | NM_009211.2      |
| 24 | Gene Cspg5    | Ngc, Cspg5, AI chondroitin sulfate proteoglycan 5                   | NM_013884.3, NM  |
| 21 | Gene Scap     | mKIAA0199, 9: SREBF chaperone                                       | NM_001001144.2   |
| 35 | Gene Ptpn23   | Ptpn23, PTP-TI protein tyrosine phosphatase, non-receptor type 23   | NM_001081043.1   |
| 30 | Gene Kif9     | Kif9, MGC141E kinesin family member 9                               | NM_010628.3, NM  |
| 30 | Gene Setd2    | KMT3A, 49215 SET domain containing 2                                | NM_001081340.2   |
| 22 | Gene Nradd    | Nradd, NRDD, neurotrophin receptor associated death domain          | NM_026012.2      |
| 22 | Gene Nbeal2   | 1110014F23Ri neurobeachin-like 2                                    | NM_183276.2      |
| 19 | Gene Pth1r    | Pthr, Pthr1, PP parathyroid hormone 1 receptor                      | NM_001083936.1   |
| 19 | Gene Prss46   | MGC107146, 7 protease, serine, 46                                   | NM_183103.2      |
| 22 | Gene Prss50   | 79H19C, Tsp5C protease, serine, 50                                  | NM_146227.4      |
| 22 | Gene Tmie     | sr, Mm.87012, transmembrane inner ear                               | NM_146260.2      |
| 22 | Gene Als2cl   | mRn.49018, 7: ALS2 C-terminal like                                  | NM_146228.4, NM  |
| 24 | Gene Lrrfip2  | AI850587, Lrrf ileucine rich repeat (in FLII) interacting protein 2 | NM_027742.3, NM  |
| 28 | Gene Trank1   | A230061D21Ri tetratricopeptide repeat and ankyrin repeat contain    | NM_001164659.1   |
| 44 | Gene Pcd6ip   | Eig2, Pcd6ip, programmed cell death 6 interacting protein           | NM_001164677.1   |
| 35 | Gene Clasp2   | 8030404L10Ri CLIP associating protein 2                             | NM_029633.2, NM  |
| 21 | Gene Ubp1     | Ubp1, LBP-1a, upstream binding protein 1                            | NM_013699.2, NM  |
| 33 | Gene Crtap    | Crtap, CASP, L cartilage associated protein                         | NM_019922.2      |
| 30 | Gene Dync1li1 | Dync1li1, 1110 dynein cytoplasmic 1 light intermediate chain 1      | NM_146229.2      |
| 26 | Gene Cmtm7    | Cklfs7, AI481E CKLF-like MARVEL transmembrane domain containi       | NM_001252479.1,  |
| 26 | Gene Cmtm8    | 2700018N07Ri CKLF-like MARVEL transmembrane domain containi         | NM_027294.2      |
| 21 | Gene Gpd1l    | Gpd1l, D9Ertd glycerol-3-phosphate dehydrogenase 1-like             | NM_175380.5      |
| 21 | Gene Gm9846   | ENSMUSG000C predicted gene 9846                                     | NM_001190258.1   |
| 34 | Gene Stt3b    | Stt3b, Simp, 1: STT3, subunit of the oligosaccharyltransferase comp | NM_024222.2      |
| 28 | Gene Tgfbr2   | DNIIR, RIIDN, T transforming growth factor, beta receptor II        | NM_009371.3, NM  |
| 28 | Gene Azi2     | Azi2, AA41014 5-azacytidine induced gene 2                          | NM_013727.3, NM  |
| 27 | Gene Itga9    | D130073C02, I integrin alpha 9                                      | NM_133721.2, NM  |
| 28 | Gene Ctdspl   | AI426263, Ctd: CTD (carboxy-terminal domain, RNA polymerase II, r   | NM_133710.3      |

|    |               |                                                                      |                  |
|----|---------------|----------------------------------------------------------------------|------------------|
| 29 | Gene Oxsr1    | 2810422B09Ri oxidative-stress responsive 1                           | NM_133985.2, NR  |
| 18 | Gene Myd88    | Myd88                                                                | NM_010851.2      |
| 18 | Gene Acaa1a   | Acaa, Acaa1a, acetyl-Coenzyme A acyltransferase 1A                   | NM_130864.3      |
| 19 | Gene Xylb     | AI132223, Xylt xylulokinase homolog (H. influenzae)                  | NM_001033209.3   |
| 19 | Gene Acvr2b   | Acvr2b, ActRIII activin receptor IIB                                 | NM_007397.2      |
| 19 | Gene Exog     | Exog, Endogl2, endo/exonuclease (5'-3'), endonuclease G-like         | NM_001172136.1   |
| 17 | Gene Wdr48    | 8430408H12Ri WD repeat domain 48                                     | NM_026236.3      |
| 28 | Gene Csrnp1   | Axud1, CSRNP: cysteine-serine-rich nuclear protein 1                 | NM_153287.3      |
| 38 | Gene Slc25a38 | Slc25a38, BC0: solute carrier family 25, member 38                   | NM_144793.1      |
| 38 | Gene Rpsa     | 67lr, Lamr1, 6 ribosomal protein SA                                  | NM_011029.4      |
| 38 | Gene Snora62  | E2, MBI-13, Sn small nucleolar RNA, H/ACA box 62                     | NR_002902.1      |
| 38 | Gene Gm5922   | Gm5922, EG54 predicted gene 5922                                     | XR_108165.1, XR_ |
| 24 | Gene Eif1b    | 1500010M16R eukaryotic translation initiation factor 1B              | NM_026892.3      |
| 27 | Gene 4930593  | 4930593C16Ri RIKEN cDNA 4930593C16 gene                              | NR_040753.1      |
| 27 | Gene Ctnnb1   | Catnb, Mesc, Catenin (cadherin associated protein), beta 1           | NM_007614.3, NM  |
| 26 | Gene Sec22c   | Sec22l3, Sec22SEC22 vesicle trafficking protein homolog C (S. cerev  | NM_178677.4, NM  |
| 26 | Gene Deb1     | Deb1, 111002( differentially expressed in B16F10 1                   | NM_026794.2      |
| 23 | Gene Nktr     | 5330401F18Ri natural killer tumor recognition sequence               | NM_010918.2      |
| 22 | Gene E530011  | E530011L22Ril RIKEN cDNA E530011L22 gene                             | NR_033503.1      |
| 22 | Gene Zfp651   | R74626, Zfp65 zinc finger protein 651                                | NM_001166644.1   |
| 20 | Gene Klhl40   | Kbtbd5, 23100 kelch-like 40                                          | NM_028202.3      |
| 20 | Gene Hhatl    | Hhatl, 111001: hedgehog acyltransferase-like                         | NM_029095.2, NR  |
| 32 | Gene Higd1a   | Higd1a, AI303: HIG1 domain family, member 1A                         | NM_019814.4      |
| 25 | Gene Abhd5    | CDS, Abhd5, 1: abhydrolase domain containing 5                       | NM_026179.2      |
| 26 | Gene Zfp105   | Zfp105, AW55' zinc finger protein 105                                | NM_009544.2      |
| 39 | Gene 1110059  | 1110059G10Ri RIKEN cDNA 1110059G10 gene                              | NM_025419.4      |
| 39 | Gene Kif15    | 3110023M17R kinesin family member 15                                 | NM_010620.1      |
| 27 | Gene Tmem42   | AV003444, D9I transmembrane protein 42                               | NM_025339.4, NM  |
| 32 | Gene Zdhhc3   | Zfp373, 22100 zinc finger, DHHC domain containing 3                  | NM_026917.5      |
| 32 | Gene Exosc7   | Exosc7, mKIAA exosome component 7                                    | NM_001081188.1   |
| 25 | Gene Tmem15   | 2310037P21Ri transmembrane protein 158                               | NM_001002267.2   |
| 26 | Gene Limd1    | AW822033, Lir LIM domains containing 1                               | NM_013860.2      |
| 26 | Gene Sacm1l   | mKIAA0851, S: SAC1 (suppressor of actin mutations 1, homolog)-lik    | NM_030692.4      |
| 28 | Gene Lztf1    | 5530402H04Ri leucine zipper transcription factor-like 1              | NM_033322.2      |
| 29 | Gene 4930526  | 1600027J15Ril RIKEN cDNA 4930526I15 gene                             | NR_015516.1, NR_ |
| 29 | Gene Gm2078   | Gm20783 predicted gene, 20783                                        | XM_003086771.1,  |
| 20 | Gene Clcn5    | CIC-5, T25545, chloride channel 5                                    | NM_016691.4, NM  |
| 16 | Gene Ppp1r3f  | Sfc15, RF3, PpI protein phosphatase 1, regulatory (inhibitor) subuni | NM_138605.2      |
| 16 | Gene 4930524  | 4930524L23Ril RIKEN cDNA 4930524L23 gene                             | NR_029473.1      |
| 16 | Gene Foxp3    | JM2, sf, scurfir forkhead box P3                                     | NM_054039.2, NM  |
| 18 | Gene Bcor     | mKIAA1575, 5: BCL6 interacting corepressor                           | NM_029510.3, NM  |
| 20 | Gene Usp9x    | Dffrx, AA4073( ubiquitin specific peptidase 9, X chromosome          | NM_009481.2      |
| 23 | Gene Ddx3x    | Fin14, Ddx3x, IDEAD/H (Asp-Glu-Ala-Asp/His) box polypeptide 3, X-    | NM_010028.3      |
| 25 | Gene Slc25a5  | MGC101927, A solute carrier family 25 (mitochondrial carrier, aden   | NM_007451.3      |
| 20 | Gene C330007  | C330007P06Rik                                                        | NM_029951.1      |
| 20 | Gene Ube2a    | HR6A, Ube2a, Mhr6a, HHR6A                                            | NM_019668.3      |
| 17 | Gene Hs6st2   | Hs6st2, 6OST2 heparan sulfatase 6-O-sulfotransferase 2               | NM_015819.3, NM  |

|    |                   |                                                                   |                 |
|----|-------------------|-------------------------------------------------------------------|-----------------|
| 21 | Gene Ddx26b       | Ddx26b, 63305 DEAD/H (Asp-Glu-Ala-Asp/His) box polypeptide 26B    | NM_172779.4     |
| 19 | Gene Hmgb3        | Hmg2a, Hmgb: high mobility group box 3                            | NM_008253.3     |
| 18 | Gene Xlr4b        | Xlr4, Xlr4b X-linked lymphocyte-regulated 4B                      | NM_021365.2     |
| 18 | Gene F8a          | DXUcsf1, F8a, factor 8-associated gene A                          | NM_007978.3     |
| 18 | Gene Xlr4c        | Xlr4c, 2900036 X-linked lymphocyte-regulated 4C                   | NM_183094.3     |
| 18 | Gene Zfp275       | AI593314, DXP zinc finger protein 275                             | NM_031494.2, NM |
| 16 | Gene Mecp2        | BB130002, Mb methyl CpG binding protein 2                         | NM_001081979.1, |
| 20 | Gene Atp6ap1      | Atp6s1, C7-1, ATPase, H+ transporting, lysosomal accessory protei | NM_018794.4     |
| 20 | Gene Gdi1         | GDIalpha, Gdi1 guanosine diphosphate (GDP) dissociation inhibitor | NM_010273.4     |
| 20 | Gene Fam50a       | Fam50a, XAP-5 family with sequence similarity 50, member A        | NM_138607.3     |
| 25 | Gene Tbl1x        | Tbl1, 5330429 transducin (beta)-like 1 X-linked                   | NM_020601.2     |
| 20 | Gene Arx          | Arx aristaless related homeobox                                   | NM_007492.3     |
| 21 | Gene Gspt2        | MGC143749, G1 to S phase transition 2                             | NM_008179.2     |
| 21 | Gene Efnb1        | Efnb1, LERK-2, ephrin B1                                          | NM_010110.4     |
| 18 | Gene Nhs12        | EG621083, Nh: NHS-like 2                                          | NM_001163610.1  |
| 15 | Gene Rps4x        | Rps4x, MGC11 ribosomal protein S4, X-linked                       | NM_009094.1     |
| 17 | Gene C77370       | A230051P11, expressed sequence C77370                             | NM_001077354.2  |
| 16 | Gene LOC101055819 | uncharacterized LOC101055819                                      | XM_003945612.1  |
| 16 | Gene Huwe1        | C80292, LASU: HECT, UBA and WWE domain containing 1               | NM_021523.4     |
| 20 | Gene Sh3kbp1      | Seta, Ruk, AI44 SH3-domain kinase binding protein 1               | NM_001135727.1  |
| 20 | Gene Nhs          | Nhs1, Gm48, C Nance-Horan syndrome (human)                        | NM_001081052.1  |
| 15 | Gene Rbbp7        | AA409861, BB: retinoblastoma binding protein 7                    | NM_009031.3     |
| 20 | Gene Gpm6b        | M6B, Gpm6, A glycoprotein m6b                                     | NM_001177955.1  |
| 29 | Gene Msl3         | Msl3l1, AU018 male-specific lethal 3 homolog (Drosophila)         | NM_010832.4     |



Affy Tag            PROT  
1435850\_at        NP\_001011874.1  
141892.1  
1425189\_a\_at, 14 NP\_001171129.1, NP\_079576.1  
1415826\_at        NP\_598587.2  
                  NP\_034472.1  
1418968\_at, 1431 NP\_033956.2  
1416998\_at        NP\_067486.2  
1424392\_at, 1424 NP\_780445.1  
                  NP\_032677.2  
1434706\_at        NP\_775619.2  
1431585\_at  
                  NP\_808390.2  
1436506\_a\_at  
  
141896.1  
XM\_003689325.1 XP\_003688815.1, XP\_003689373.1  
1424977\_at, 1430 NP\_663730.1, NP\_081309.1  
                  NP\_038743.1  
1420340\_at, 1431 NP\_080769.3  
1415711\_at        NP\_001095900.1  
1432047\_at, 1436 NP\_083801.1, NP\_001028808.1, XP\_003946085.1  
1435233\_at, 1435 NP\_032704.2, NP\_001071163.1  
1421727\_at        NP\_034294.2, NP\_001239121.1  
                  NP\_001028460.1  
1415979\_x\_at, 14 NP\_035421.2  
1426968\_a\_at     NP\_598593.1  
1426398\_at        NP\_001257945.1, NP\_001257946.1, NP\_080049.2  
1421520\_at        NP\_065629.1  
1420028\_s\_at, 14 NP\_032589.1  
1419342\_at        NP\_803128.1  
                  NP\_742122.2  
1429357\_at, 1429 NP\_080880.4  
1421698\_a\_at, 14 NP\_031759.2  
                  NP\_035330.1  
1418035\_a\_at, 14 NP\_032948.1  
  
1423948\_at        NP\_663367.1  
1427208\_at        NP\_598578.1  
1435033\_at        NP\_898840.2  
1417293\_at        NP\_056633.2  
, NM\_001172206.1 NP\_001165676.1, NP\_001165677.1, NP\_666108.2  
1429849\_at        NP\_766240.1  
1421635\_at, 1431 NP\_291048.2

1420480\_at, 1420 NP\_444416.2, NP\_001034640.1  
1428863\_at NP\_080517.1  
1433920\_at NP\_001119519.1  
1428581\_at NP\_958753.2, NP\_082233.1, NP\_001119518.1  
NP\_034072.2  
1426403\_at NP\_666219.1  
NP\_061360.2  
1421360\_at, 1436 NP\_766559.2, NP\_084542.2  
1426355\_a\_at, 14 NP\_932123.3  
1421982\_a\_at, 14 NP\_080399.1  
1435641\_at NP\_776295.1  
1424512\_a\_at, 14 NP\_742051.1  
1434604\_at, 1434 NP\_938045.2  
1422624\_at NP\_062516.2  
1430435\_at, 1433 NP\_034808.2  
1424002\_at NP\_081126.2  
1421036\_at, 1421 NP\_032745.2  
^\_001252218.1, NI NP\_444487.1, NP\_001239147.1, NP\_001239148.1  
1416996\_at NP\_061245.3  
1422615\_at, 1434 NP\_032722.2, NP\_001239129.1, NP\_001239130.1, NP\_001239131.1  
1418034\_at, 1435 NP\_076003.3  
1419184\_a\_at NP\_034342.1  
1416796\_at, 1416 NP\_035009.3  
1428593\_at NP\_083644.1  
1436443\_a\_at NP\_076134.1  
1434288\_at NP\_653141.3  
NP\_035859.2  
1427450\_x\_at NP\_034993.2, NP\_001155289.1  
1434657\_at, 1436 NP\_001074550.1, NP\_001106854.1  
, NR\_024590.1 NP\_001136119.1  
1423452\_at, 1430 NP\_598571.2  
1434856\_at NP\_001074902.2  
1418561\_at, 1418 NP\_112456.2  
1428487\_s\_at NP\_080700.3, NP\_001034799.1  
1426351\_at NP\_034607.3  
1422579\_at NP\_032329.1  
1423167\_at, 1423 NP\_079559.2  
168797.1  
NP\_780648.1  
NP\_001108135.1  
1425904\_at, 1427 NP\_631885.1  
\_024326.1  
  
1431183\_at, 1434 NP\_082822.1  
1434692\_at NP\_001032831.2, NP\_001107574.1  
1424075\_at NP\_001074650.1  
1425913\_a\_at, 14 NP\_659131.2, NP\_001158038.1

1428185\_at NP\_001153336.1, NP\_001153337.1  
 A\_001177867.1 NP\_950172.1, NP\_001171338.1

1423039\_a\_at, 14 NP\_080100.1  
 1426124\_a\_at NP\_001036099.1  
 1429627\_at, 1430 NP\_081650.2, NP\_081627.1  
 1418225\_at, 1418 NP\_032791.1, NP\_001020549.1  
 104582.1  
 1424996\_at, 1425 NP\_997536.1, NP\_033935.2  
 1429607\_at, 1435 NP\_765994.2  
 1433544\_at NP\_766244.4  
 1417783\_at, 1417 NP\_001153420.2, NP\_666221.1, NP\_082993.4  
 NP\_032083.3  
 NP\_033486.1  
 NP\_061356.2

1419616\_at, 1434 NP\_031587.1  
 1434010\_at NP\_001032814.1  
 1434302\_at, 1434 NP\_001038978.3  
 1427169\_at NP\_001074519.2  
 1426528\_at, 1435 NP\_001070871.1, NP\_035069.2, NP\_001070874.1, NP\_001070872.1, NP\_001070873  
 1425143\_a\_at NP\_663493.2, NP\_001153510.1, NP\_001153511.1, NP\_001153512.1  
 NP\_061266.2

NP\_666362.1  
 A\_001267872.1 NP\_082949.1, NP\_001254801.1  
 1419354\_at, 1419 NP\_291041.2  
 1421582\_a\_at, 14 NP\_598589.2, NP\_034082.1, NP\_001032815.1  
 1418928\_a\_at NP\_080240.1

NP\_001091113.1  
 1422937\_at NP\_001036124.1, NP\_073558.2  
 1419821\_s\_at, 14 NP\_034627.3, NP\_001104790.1  
 1422994\_at NP\_035216.2  
 1420594\_at NP\_031551.1  
 1428506\_at NP\_080471.2  
 1426642\_at NP\_034363.1

1416217\_a\_at, 14 NP\_033110.1  
 NP\_032368.2  
 1422313\_a\_at NP\_034648.2  
 1419283\_s\_at, 14 NP\_082160.3  
 , NM\_001170641.1 NP\_001029232.2, NP\_001164112.1  
 NP\_083987.1  
 1418746\_at NP\_001034598.1, NP\_079856.2, NP\_064383.1  
 1417162\_at NP\_081430.3  
 XM\_003946059.1 XP\_003945360.1, XP\_003946108.1

1420361\_at NP\_038640.2  
 NP\_694728.1

1434242\_at NP\_795946.2  
 NP\_067358.1  
 NP\_080060.1  
 NP\_067288.2

1434733\_at NP\_778196.2  
 1417590\_at NP\_077226.2  
 NP\_034674.1  
 NP\_919314.2

1427879\_at NP\_081253.1  
 NP\_739561.2

1424521\_at NP\_081122.2, NP\_001153377.1, NP\_001153378.1  
 1422524\_at NP\_076221.1  
 1435784\_at NP\_001003917.2  
 1420247\_at, 1430 NP\_083286.1  
 1426160\_a\_at NP\_035624.3  
 1417373\_a\_at, 14 NP\_033473.1  
 , NM\_001243091.1 NP\_001230019.1, NP\_001230020.1  
 A\_178055.4, NM\_C NP\_064662.2, NP\_835156.1, NP\_001153355.1, NP\_001153356.1, NP\_001153357.1  
 1416588\_at NP\_033011.2  
 1426731\_at, 1426 NP\_034173.1

1417305\_at, 1425 NP\_001078840.1, NP\_001078839.1, NP\_031489.4, NP\_001166948.1  
 NP\_898843.1  
 , NM\_001001566.1 NP\_001001565.1, NP\_001001566.1  
 NP\_796030.1

1427535\_s\_at, 14 NP\_849215.3  
 1422728\_at NP\_034694.3  
 1431792\_a\_at NP\_082162.3  
 1418485\_at NP\_033234.2  
 XP\_001472501.2  
 , NM\_001136226.1 NP\_001001981.2, NP\_001129698.1  
 1428386\_at, 1428 NP\_083093.2, NP\_001028778.2, NP\_001129694.1  
 NP\_898848.1

1424749\_at, 1435 NP\_001104749.1, NP\_081333.1  
 141939.1  
 1426651\_at, 1430 NP\_001074679.1  
 1416666\_at NP\_033281.1  
 1435343\_at NP\_780500.2  
 1423104\_at NP\_034700.2  
 141940.1  
 1426922\_s\_at, 14 NP\_034602.1  
 1423898\_a\_at, 14 NP\_598736.4  
 1419305\_a\_at NP\_079662.1  
 1418432\_at, 1418 NP\_598542.3

, NM\_001144993.1 NP\_001138464.1, NP\_001138465.1  
1429291\_at NP\_081633.1  
1415771\_at, 1415 NP\_035010.3

1431350\_at  
NP\_032998.1  
1422790\_at NP\_035063.1  
NP\_083165.1  
^\_001110212.1 NP\_666224.3, NP\_001103682.1  
1428169\_at NP\_084122.2, NP\_001192320.1, NP\_001192321.1  
1435901\_at NP\_001028463.1, NP\_001185502.1  
1436512\_at NP\_796279.2  
1416305\_at NP\_598577.1  
1435432\_at, 1435 NP\_835220.1, NP\_001032213.1  
1420337\_at NP\_034392.1  
1415934\_at NP\_598566.3  
1433842\_at NP\_001104781.1, NP\_032541.1, NP\_001104782.1  
1429568\_x\_at, 14 NP\_080730.1  
NP\_001028464.1  
NP\_081827.1  
NP\_775571.2  
NP\_075832.1

1436050\_x\_at NP\_062352.1  
1417602\_at, 1417 NP\_035196.2  
NP\_082994.1  
NP\_031881.1  
1418068\_at NP\_077159.1  
NP\_667249.1  
1433516\_a\_at, 14 NP\_001156897.1  
1426193\_at NP\_694754.1  
1417389\_at NP\_057905.1  
NP\_766438.2  
1429613\_at NP\_780327.1  
NP\_852070.3  
|\_001474855.2 XP\_982250.2, XP\_001474905.1  
1435603\_at NP\_766051.4  
NP\_543126.2  
1417919\_at NP\_075689.1  
1415987\_at, 1415 NP\_598569.1  
1423472\_at, 1423 NP\_035021.1, NP\_001153189.1, NP\_001153190.1, NP\_001153191.1  
1416770\_at NP\_067512.3  
1417040\_a\_at NP\_058058.1  
1424052\_at NP\_080196.3  
1424102\_at, 1424 NP\_777363.1  
, NM\_023136.2 NP\_001099137.1, NP\_075625.1

1431134\_at, 1436 NP\_079730.1  
1419170\_at, 1419 NP\_080597.2  
1417471\_s\_at NP\_598586.1  
1421284\_at, 1425 NP\_038812.2  
1430126\_at, 1433 NP\_775279.2, NP\_083625.1  
l\_983271.2 XP\_926778.2, XP\_988365.1  
1434401\_at NP\_001116147.1, NP\_001116148.1

1426994\_at NP\_598582.3  
1417007\_a\_at NP\_033216.2  
NP\_001074785.1  
1416907\_at, 1416 NP\_035780.1  
NP\_001074594.1  
1426858\_at, 1426 NP\_032407.1  
1417744\_a\_at, 14 NP\_071722.1  
NP\_666215.1  
1425199\_a\_at NP\_663481.2, NP\_001106887.1  
1421330\_at NP\_064317.2  
1416070\_a\_at, 14 NP\_080136.2  
1426392\_a\_at, 14 NP\_076224.1, NP\_001192314.1, NP\_001192315.1  
NP\_083063.2  
1431569\_a\_at NP\_659568.2  
, NM\_172484.3, NI NP\_001075225.1, NP\_766072.2, NP\_795931.2  
1425744\_a\_at, 14 NP\_660110.2  
NP\_081954.1  
1433871\_at NP\_861415.2  
1426484\_at, 1426 NP\_080666.2  
1416251\_at NP\_032593.1  
1423800\_at NP\_663482.2, NP\_803228.2  
1422090\_a\_at, 14 NP\_032851.2, NP\_001155887.1, NP\_001155888.1  
NP\_848806.2  
1426648\_at NP\_032577.1  
1424229\_at NP\_663483.1  
1422637\_at, 1422 NP\_061220.2  
1417813\_at NP\_062751.2  
1427967\_at, 1429 NP\_001074480.2  
NP\_780591.1  
1433519\_at, 1434 NP\_780503.2, NP\_001139276.1  
1422233\_at, 1427 NP\_031949.2  
1424885\_at NP\_659059.1  
1429049\_at NP\_083054.1, NP\_001181954.1  
1428108\_x\_at NP\_849205.1  
1436300\_at, 1436 NP\_766104.2  
1433469\_at NP\_034862.1  
NP\_001092746.2  
1426798\_a\_at, 14 NP\_598580.1  
1425159\_at NP\_080956.1

NP\_839991.2  
 NP\_112469.1  
 NP\_780652.2  
 NP\_035569.2  
 NP\_033253.1  
 NP\_653113.4  
 1416250\_at NP\_031596.1  
 1424048\_a\_at NP\_082333.1  
 1424312\_at NP\_082596.2  
 1435786\_at NP\_694768.1  
 1419927\_s\_at NP\_663485.1  
 1430094\_at NP\_001138772.1  
 1427142\_s\_at, 141 NP\_690855.2  
 1431462\_at, 1434 NP\_001074776.1  
 1422462\_at NP\_080300.1  
 1427028\_at, 1436 NP\_001028581.1  
 NP\_796055.1  
 1424640\_at NP\_081099.1  
 A\_001159624.1 NP\_663392.2, NP\_001153096.1  
 1427485\_at NP\_444336.2  
 NP\_780468.1  
 1424466\_at NP\_722469.1  
 NP\_775613.2  
 168598.1  
 XM\_003946044.1 XP\_003945669.1, XP\_003946093.1  
 NP\_038778.1  
 \_046168.1, NR\_046169.1, NR\_046170.1  
 1421119\_at, 1435 NP\_001034561.1  
 1429044\_at, 1431 NP\_001074829.1  
 NP\_080776.1  
 NP\_001074727.1  
 1420410\_at NP\_109601.1, NP\_001153241.1  
 1416816\_at NP\_067618.1  
 1419324\_at, 1429 NP\_034844.1, NP\_001036042.1, NP\_001020736.1  
 1435776\_at NP\_001074695.1  
 1428779\_at NP\_766231.2  
 1422814\_at NP\_033921.3  
 1427971\_at, 1427 NP\_666103.1  
 1422998\_a\_at NP\_075994.2, NP\_001033682.1, NP\_001033683.1, NP\_001033681.1  
 NP\_001019891.2  
 1420961\_a\_at, 14 NP\_473443.2, NP\_001034600.1, NP\_001034601.1  
 1422567\_at NP\_071301.2  
 NP\_001034733.2  
 1436431\_at NP\_932107.1  
 NP\_079953.2  
 NP\_808424.3

NP\_001074666.1  
NP\_080645.2  
, NM\_001160256.1 NP\_001005507.1, NP\_001153728.1, NP\_001153729.1  
1423885\_at, 1423 NP\_034813.2  
1429324\_at NP\_001028334.1  
1425617\_at, 1425 NP\_031868.2  
NP\_839975.2  
1426235\_a\_at, 14 NP\_032157.2  
NP\_001191837.1  
1417612\_at, 1417 NP\_034630.1  
1435175\_at XP\_148974.3, XP\_998795.2  
1426053\_a\_at, 14 NP\_035403.1  
1421483\_at NP\_034842.2  
1420831\_at, 1420 NP\_075757.1, NP\_001020116.1  
1431102\_at NP\_001034273.1  
1426084\_a\_at NP\_659040.2, NP\_001153490.1, NP\_001153491.1  
1418115\_s\_at, 14 NP\_071724.1, NP\_001153652.1, NP\_766431.3, NP\_001153653.1, NP\_001153654.1  
^\_001136104.1 NP\_033725.2, NP\_001129576.1  
NP\_663388.1  
1436248\_at NP\_808312.3  
1428452\_at  
NP\_033916.1  
1421488\_at, 1429 NP\_001033710.1, NP\_038890.3  
1434933\_at NP\_001020123.1  
NP\_775600.1  
1419291\_x\_at, 1424843\_a\_at, 1436222\_at  
  
1433838\_at NP\_766232.1  
1422895\_at, 1422 NP\_058076.2  
1429432\_at, 1429 NP\_001074759.1  
1428918\_at NP\_083052.1  
1417902\_at, 1426 NP\_473428.1  
1418453\_a\_at, 14 NP\_033851.1  
1433912\_at NP\_663488.1  
1428167\_a\_at, 14 NP\_001077366.1, NP\_001001880.1  
1424194\_at, 1430 NP\_001033935.1, NP\_848708.2  
1419716\_a\_at, 14 NP\_035267.2, NP\_945150.2, NP\_945151.2, NP\_945152.2  
^\_001142948.1 NP\_780379.2, NP\_001136420.1  
1417137\_at, 1426 NP\_109649.1  
1423759\_a\_at NP\_001034572.1  
1416743\_at, 1416 NP\_598567.2, XP\_003689378.1  
1430442\_at NP\_081804.1, NP\_001103455.1  
1435444\_at NP\_001074773.1  
1420636\_a\_at, 14 NP\_075662.2  
1416618\_at NP\_032937.1  
NP\_038947.2



1416327\_at NP\_079664.1  
1432000\_a\_at, 14 NP\_035745.3, NP\_001122081.1  
1417468\_at, 1417 NP\_036179.1, NP\_001229509.1  
1421950\_at NP\_035200.2  
1436171\_at NP\_001005508.2  
1426164\_a\_at NP\_033506.1  
NP\_001157997.1  
NP\_062357.3  
1419218\_at, 1436 NP\_277044.1  
1418570\_at NP\_067620.3  
1415706\_at NP\_034068.3  
1434133\_s\_at, 14 NP\_705783.1  
NP\_536344.1  
1426115\_a\_at, 14 NP\_032455.2  
1419601\_at NP\_001034573.1  
1418964\_at NP\_080510.1  
1420518\_a\_at NP\_291086.2, NP\_001139272.1  
1420245\_x\_at, 14 NP\_848713.1  
1436671\_at NP\_808391.2  
NP\_081001.1  
1\_001199003.1 NP\_036010.2, NP\_001185932.1  
1417677\_at NP\_034228.1  
1422322\_at, 1435 NP\_067325.2  
1430082\_at NP\_083729.2  
1418026\_at, 1418 NP\_036142.2  
1422078\_at, 1435 NP\_035915.3  
NP\_031448.2  
104601.1  
1428619\_at NP\_079787.1  
1423050\_s\_at, 14 NP\_058085.2  
1420513\_at NP\_080902.1  
NP\_001155137.1  
1423441\_at NP\_032275.2  
NP\_666217.2  
1426510\_at NP\_848768.1  
1424712\_at NP\_080651.2  
1425869\_a\_at, 14 NP\_001122077.1, NP\_035313.2  
1435272\_at NP\_001074644.1  
NP\_001074696.1  
1422502\_at, 1422 NP\_031441.2  
1428639\_at NP\_780395.2, NP\_001096652.1  
1421505\_at NP\_038757.1  
1426635\_at, 1428 NP\_573488.2  
1420376\_a\_at, 14 NP\_032236.1  
168795.1  
1436227\_at NP\_796073.1  
NP\_598466.1

1417638\_at NP\_034224.1  
1423871\_at NP\_659043.1  
1423961\_at, 1423 NP\_663489.4  
1415829\_at NP\_598576.2  
035284.2  
1417530\_a\_at NP\_036188.1  
1433937\_at, 1433 NP\_775554.2  
1416257\_at NP\_033924.2  
1430671\_a\_at, 14 NP\_082137.1  
1423870\_at NP\_859421.1  
1434698\_at NP\_796363.2  
1426735\_at NP\_941055.1  
1418764\_a\_at NP\_035924.2  
1426713\_s\_at, 14 NP\_084011.1  
1423250\_a\_at NP\_033393.2  
1432855\_at NP\_766238.1  
N\_001159850.1, N\_001159850.1, NP\_034737.2, NP\_001153322.1  
168796.1  
1427161\_at NP\_001074832.2  
1421499\_a\_at, 14 NP\_033002.2  
1424760\_a\_at NP\_081072.1  
1421336\_at NP\_032963.1  
1434563\_at NP\_848890.3  
N\_027352.1 NP\_659128.2  
NP\_084336.1  
141936.2  
1417879\_at NP\_079700.1  
1417030\_at, 1417 NP\_080140.1  
1423911\_at NP\_659129.2  
104624.1  
1430228\_at, 1434 NP\_084042.1  
1428531\_at, 1428 NP\_848747.4  
1424349\_a\_at, 14 NP\_758470.1, NP\_001128301.1  
1417299\_at NP\_035022.2  
  
1422786\_at, 1436 NP\_033605.1  
1425352\_at, 1428 NP\_659063.2  
  
1425636\_at NP\_659130.2  
035377.2  
  
, NM\_198247.2 NP\_001171265.1, NP\_937890.2  
XM\_003945323.1 XP\_003946106.1, XP\_003945372.1  
1429772\_at NP\_032908.2  
1435363\_at NP\_001028425.1, NP\_001153414.1  
N\_001170785.1, N\_001170785.1, NP\_758512.3, NP\_001164256.1, NP\_001164257.1  
1419706\_a\_at NP\_112462.1

1434901\_at NP\_001028638.2  
 1424505\_at NP\_079619.4  
 1421495\_a\_at NP\_077223.2  
 1429499\_at NP\_080271.2  
 NP\_780583.1  
 ^\_001161822.1 NP\_064342.1, NP\_001155294.1  
 1433983\_at NP\_766134.1  
 1433536\_at NP\_766372.1  
 1422665\_a\_at, 14 NP\_032812.2  
  
 1432187\_at, 1432 NP\_663752.2  
  
 1427679\_at, 1435 NP\_034820.1  
 1429731\_at XP\_003945511.1, XP\_003945899.1  
 1424043\_at NP\_080417.2  
 1423462\_at NP\_619608.1  
 NP\_796361.2  
 1432055\_at NP\_780364.3  
 XM\_003945849.1 XP\_003945508.1, XP\_003945898.1  
 1430301\_at, 1435 NP\_001074813.2  
 1429441\_at, 1436 NP\_082244.2, NP\_001161769.1  
 1426892\_at, 1427 NP\_035812.3  
 1426208\_x\_at NP\_033564.2  
 1426813\_at NP\_852135.1  
 , NM\_001195066.1 NP\_001181994.1, NP\_001181995.1, NP\_001028429.1, NP\_001182025.1  
 1422018\_at, 1434 NP\_034567.2  
 105340.1  
 1415722\_a\_at NP\_079694.2  
  
 1430110\_at NP\_083998.1  
 1421267\_a\_at NP\_034958.2  
 NP\_082716.1  
 1416216\_at NP\_033074.2, NP\_001104535.1  
 1421340\_at NP\_032606.4  
 ^\_001042593.1, NP\_062676.2, NP\_001036058.1, NP\_001138681.1  
 1416041\_at NP\_001155317.2, NP\_001155319.1, NP\_001155320.1, NP\_001155321.1, NP\_001155  
 1431415\_a\_at, 14 NP\_035733.1  
 141522.1  
 1417447\_at NP\_035675.1  
 NP\_035425.2  
  
 1428795\_at NP\_898939.2  
 1418436\_at NP\_058077.2  
 1416953\_at NP\_034347.2  
 1433490\_s\_at, 14 NP\_038539.2, NP\_001186194.1  
 1434246\_at NP\_766375.1

1423277\_at, 1423 NP\_033009.1  
1429628\_at NP\_080414.2  
1429156\_at NP\_001103217.1  
1428551\_at, 1430 NP\_082880.2  
  
1418583\_at NP\_080074.1  
1418106\_at NP\_038932.1  
1418412\_at NP\_033439.1  
1430242\_at NP\_079890.1  
NP\_766096.1  
1415908\_at NP\_033459.1  
1415971\_at, 1415 NP\_032564.1  
168466.1  
1417558\_at NP\_032080.2, NP\_001116364.1, NP\_001116365.1  
1434723\_at  
1424632\_a\_at, 14 NP\_035394.2  
1416835\_s\_at NP\_033795.1  
1434997\_at NP\_001161776.1, NP\_937807.2  
NP\_808461.1  
NP\_082155.1  
1418545\_at NP\_114083.1  
1419577\_at NP\_598760.1  
1416759\_at NP\_612188.1, NP\_001157905.1  
1416999\_at NP\_033239.1  
NP\_082706.1  
1416440\_at, 1431 NP\_058594.1  
1433711\_s\_at NP\_001156380.1, NP\_001013388.2  
1434831\_a\_at, 14 NP\_062714.1  
1427073\_at NP\_665686.2  
1422480\_at NP\_059500.2  
1428334\_at NP\_766004.1  
1419819\_s\_at, 14 NP\_694695.3  
1427542\_at NP\_780616.4  
1430652\_at NP\_766007.1  
1434570\_at NP\_950193.1  
1416034\_at NP\_033976.1  
1429317\_at NP\_001074523.1  
1417668\_at NP\_570962.2  
1422796\_at NP\_035286.1  
NP\_766061.2  
1418966\_a\_at NP\_079981.2  
1421191\_s\_at NP\_444417.2, NP\_001186201.1  
1419065\_at NP\_079960.1  
1419914\_s\_at, 14 NP\_084526.1  
NP\_001191912.1  
1430563\_at NP\_082106.2  
1423511\_at NP\_079817.1

141531.1

1417110\_at, 1417 NP\_032574.1

NP\_001028557.2

1426768\_at NP\_001157305.1

1415838\_at NP\_062734.1

1422621\_at NP\_035370.2

, NM\_001024910.2 NP\_001020082.1, NP\_001020081.2

NP\_766527.3

1426519\_at NP\_035160.1

NP\_001028431.2

1421032\_a\_at, 14 NP\_064349.2

U\_001199187.2 NP\_081213.1, NP\_001186116.1

1435026\_at NP\_443720.1

NP\_058083.2

1415687\_a\_at, 14 NP\_035309.3, NP\_001139592.1, NP\_001139593.1, NP\_001139594.1, NP\_001139595

1432346\_a\_at NP\_001239564.1, NP\_075859.2

1435110\_at NP\_084046.2

1415892\_at, 1415 NP\_033189.2

NP\_001074596.1

NP\_038781.2

1417084\_at, 1436 NP\_034254.1

1416939\_at NP\_080714.2

1415696\_at, 1423 NP\_033146.1

1428689\_at, 1428 NP\_082188.1

1421612\_a\_at NP\_996883.1

1422866\_at NP\_031757.1

1424653\_at NP\_932113.2

1432593\_at NP\_082473.2

NP\_062426.2

1417875\_at NP\_444413.1

NP\_001028432.1

1434996\_at NP\_780403.1

NP\_796346.2

1427993\_at, 1434 NP\_081701.2

NP\_001073293.1

NP\_080361.1

XM\_001472786.2 XP\_001472988.2, XP\_001472836.2

1427032\_at, 1431 NP\_084390.1, NP\_080377.2

141539.1

U\_001164376.1, NP\_808280.2, NP\_001157848.1, NP\_001157991.1

1424778\_at, 1424 NP\_848721.1, NP\_001191844.1

1426900\_at NP\_997104.2, NP\_001229325.1

NP\_001031370.1

1427682\_a\_at, 14 NP\_034248.2

1435923\_at NP\_001005419.2  
1433583\_at, 1435 NP\_848794.1  
1418108\_at NP\_001074815.1  
1429206\_at, 1429 NP\_001074816.1, NP\_001239565.1, NP\_001239566.1, NP\_001239567.1  
106523.3  
NP\_031685.2  
168474.1  
1428311\_at NP\_001104591.1  
1423484\_at, 1436 NP\_113574.1  
NP\_033386.1  
1424062\_at NP\_663395.1  
1416849\_at, 1416 NP\_598768.1  
1430031\_at, 1436 NP\_081460.1  
1431136\_at, 1436 NP\_084057.1  
1427265\_at NP\_001074881.1  
1427519\_at NP\_033760.2  
1428071\_at NP\_780342.1  
1422884\_at, 1422 NP\_080371.1  
NP\_077760.1  
1416045\_a\_at, 14 NP\_035548.1, NP\_001155325.1  
1417234\_at NP\_032632.1  
1433720\_s\_at NP\_780538.2  
105408.1  
1428770\_at NP\_001074888.2  
1433873\_s\_at NP\_032813.3  
1417526\_at NP\_067543.2  
1418237\_s\_at, 14: NP\_034059.2, NP\_001103461.1  
1417448\_at NP\_598759.1  
1420131\_s\_at, 14: NP\_666037.1  
1422457\_s\_at NP\_064313.1  
1417032\_at, 1417 NP\_062777.2  
1436225\_at NP\_612174.2  
1424267\_at NP\_080707.2  
NP\_032852.2  
1425035\_s\_at NP\_001075164.1, NP\_062321.1  
1419212\_at, 1426 NP\_056605.1  
1424193\_at NP\_083822.1, XP\_003946476.1, XP\_003946477.1  
1435430\_at NP\_001074524.1  
1422506\_a\_at, 14 NP\_031819.1  
1427929\_a\_at, 14 NP\_742146.1  
1423830\_a\_at NP\_081698.2  
NP\_001019710.1  
NP\_001028645.1  
1425253\_a\_at NP\_038619.2  
NP\_683736.1  
1434879\_at NP\_808281.1

1421154\_at NP\_032252.1  
 NP\_766139.2  
 NP\_075793.1  
 1424514\_at NP\_653111.1  
 1422803\_at NP\_113557.1  
 NP\_001036175.1  
 1422034\_a\_at, 14 NP\_075617.3, NP\_001155219.1  
  
 1424874\_a\_at NP\_001070831.1, NP\_032982.2  
 NP\_033210.1, NP\_001070831.1, NP\_859009.2, NP\_001164406.1  
 1419669\_at NP\_035308.2  
 1422928\_at NP\_056594.2  
 1417867\_at NP\_038487.1  
 NP\_001163276.1 NP\_932775.2, NP\_001156748.1  
 1433931\_at, 1433 NP\_818775.2  
 NP\_444474.1  
 1419396\_at NP\_031906.1  
 1433635\_at NP\_780659.2  
 NP\_569722.1  
 1427109\_at NP\_001003949.2  
 NP\_031751.1  
 1419238\_at NP\_038878.1  
 NP\_001032830.2, NP\_032188.3  
 NP\_906271.1  
 1418644\_a\_at NP\_035622.1  
 1433494\_at NP\_001182197.1  
 1423716\_s\_at NP\_079589.2  
 NP\_067540.1  
 1416332\_at NP\_031731.1  
 1429091\_at NP\_081483.1  
 1417521\_at NP\_031935.3  
 1416536\_at NP\_075920.4  
 1424313\_a\_at NP\_083548.1  
 1422558\_at NP\_034385.1  
 1419275\_at NP\_573451.2, NP\_001116076.1, NP\_001116077.1  
 141550.1  
 NP\_033117.1  
 1422129\_at, 1435 NP\_035919.2  
 NP\_079797.1  
 1425824\_a\_at NP\_032819.1  
 1430128\_a\_at NP\_001191860.1, NP\_647453.1  
 1420336\_at NP\_079905.1, NP\_001107020.1  
 1434984\_at NP\_898975.2  
 NP\_941017.2  
 1417728\_at NP\_038623.1  
 1426297\_at, 1427 NP\_001157619.1, NP\_001157620.1, NP\_001157621.1, NP\_001157622.1, NP\_001157623.1  
 1419713\_at NP\_080370.2

1429124\_s\_at, 14 NP\_080128.2  
1416350\_at NP\_510962.2  
1415753\_at NP\_663396.1  
1430327\_at NP\_001094076.1  
1421842\_a\_at NP\_062521.1  
1423370\_a\_at NP\_001153063.1, NP\_598763.1  
1424054\_at NP\_663336.2  
1417964\_at NP\_031486.1  
NP\_955354.1  
1424179\_at NP\_076389.2  
NP\_038679.3  
NP\_031471.2  
1432289\_a\_at NP\_082277.2  
1436292\_a\_at NP\_032779.2  
  
NP\_001013780.2  
1417313\_at NP\_079625.1  
1434658\_at NP\_780404.2  
NP\_001075157.2  
NP\_038923.1  
NP\_034852.2  
1420197\_at NP\_032681.1  
1417881\_at, 1417 NP\_598896.1  
NP\_078775.1  
1424688\_at NP\_663340.1  
1415974\_at NP\_075627.2  
NP\_034861.3  
1418861\_at NP\_067476.2  
1424736\_at NP\_031933.1  
1423446\_at NP\_001177402.1, NP\_001177403.1, NP\_031854.1  
1430787\_at  
NP\_081396.1  
1417896\_at NP\_038797.2  
1424954\_a\_at NP\_032870.2, NP\_001140159.1  
NP\_081657.1  
1419222\_at NP\_033351.1  
1426150\_at NP\_683753.1  
1417637\_a\_at NP\_034570.1, NP\_001156637.1, NP\_001156638.1  
1434263\_at NP\_082933.2  
1431368\_at, 1432 NP\_001014836.2  
1419451\_at NP\_062731.1  
1417322\_at NP\_598725.2  
NP\_001093387.1  
1422565\_s\_at, 14 NP\_032714.1, NP\_081032.2  
1434969\_at NP\_795928.2  
1434254\_at NP\_034431.1  
1420619\_a\_at NP\_034477.1



1436244\_a\_at NP\_001239330.1, NP\_062699.1  
1425731\_at, 1430 NP\_081756.4  
NP\_001136435.1  
1433011\_at NP\_001156536.1  
1429402\_at, 1429 NP\_083378.2  
1428617\_at, 1428 NP\_001074687.1  
1428902\_at NP\_067414.2  
1431005\_at NP\_080855.1  
1436119\_at NP\_705771.2  
1427319\_at, 1436 NP\_001028547.2  
NP\_001004363.1  
1426754\_x\_at, 14 NP\_780660.1  
NP\_666120.1  
1423576\_a\_at NP\_034344.2  
1431280\_at, 1433 NP\_001013046.1  
1433733\_a\_at NP\_031797.1  
1428377\_at NP\_001017525.1, NP\_082985.2  
1417873\_at NP\_598754.2  
NP\_857633.2  
NP\_001157086.1  
1420129\_s\_at, 14 NP\_663397.1  
NP\_808440.2  
NP\_694875.2  
1421248\_at, 1435 NP\_001157967.1, NP\_038750.2  
1419088\_at, 1419 NP\_035725.1  
^\_001003939.2, NP\_705823.3, NP\_001003939.2, NP\_001003910.2  
1427057\_at NP\_780540.2  
1431358\_at, 1435 NP\_083525.1  
^\_028334.4 NP\_081467.2, NP\_082610.1  
1435335\_a\_at NP\_001004164.2  
NP\_780367.2  
1423513\_at NP\_083442.2  
, NM\_009684.2 NP\_001036023.1, NP\_033814.2  
^\_026166.2 NP\_081354.1, NP\_080442.2  
NP\_598429.1  
1421237\_at, 1426 NP\_035735.2, NP\_001073600.1, NP\_001073598.1, NP\_001073599.1, NP\_001073601  
1434082\_at NP\_666351.2  
NP\_067295.2  
^\_001206851.1 NP\_899022.2, NP\_001193780.1  
NP\_766126.2  
1419322\_at, 1435 NP\_444302.4  
1418605\_at NP\_035759.3  
1434252\_at, 1434 NP\_742048.2, NP\_001162155.1, NP\_796000.1  
1428375\_at, 1428376\_at  
1430303\_at, 1430 NP\_084128.2  
1423213\_at, 1423 NP\_061267.1

1427505\_a\_at NP\_034080.1  
 1418507\_s\_at NP\_031732.1, NP\_001162126.1, NP\_001162127.1, NP\_001162128.1  
 \_045339.1  
 NP\_542127.1  
 1418505\_at NP\_081998.3  
 NP\_001001932.1  
 1426083\_a\_at NP\_031595.1  
 1428936\_at, 1428 NP\_080758.1  
 1429325\_at NP\_082016.1  
 1423637\_at, 1423 NP\_056552.1  
 1415834\_at NP\_080544.1  
 1429809\_at NP\_796342.2  
 1434818\_at  
 1429487\_at NP\_082168.1  
 1426910\_at NP\_473397.1  
 NP\_848724.2  
 1434397\_at NP\_766142.2  
 A\_001003717.1 NP\_780698.2, NP\_001003717.1  
 1420476\_a\_at, 14 NP\_056596.1, NP\_001140179.1  
 1418835\_at NP\_033370.2  
 1420139\_s\_at, 14 NP\_848725.2  
 1428125\_at, 1428 NP\_001028646.2  
 168473.1  
 1416060\_at, 1416 NP\_079982.3  
 NP\_077774.1  
 141566.1  
 1421177\_at NP\_080056.1  
 NP\_001028433.2  
 NP\_034325.2  
 NP\_084258.1  
 1427486\_at, 1436 NP\_084204.2  
 NP\_067427.1  
 106559.2  
 , NM\_028082.2, NP\_001032936.2, NP\_082358.2, NP\_001032935.2, NP\_001032937.1  
 168685.1  
 1416037\_a\_at, 14 NP\_031662.2  
 NP\_808466.1  
 1423605\_a\_at, 14 NP\_034916.1  
 1435518\_at, 1435 NP\_077777.1  
 1428637\_at NP\_001014412.1  
 1428648\_at, 1428 NP\_082270.1  
 1430704\_at, 1435 NP\_082955.2  
 1428050\_a\_at NP\_080893.1  
 NP\_079707.1  
 1422851\_at NP\_034571.1

1435291\_at NP\_001074662.2  
 1433488\_x\_at, 14 NP\_083640.1  
 1417015\_at NP\_620406.1  
 1428772\_at, 1428 NP\_001074525.1  
 1427954\_at NP\_766610.2  
 1424042\_at NP\_694699.1  
  
 1428817\_at, 1428 NP\_700444.2, NP\_001156496.1, NP\_001156497.1  
     NP\_081880.2  
 106569.2  
 \_045514.1, NM\_01 NP\_877959.2, NP\_001239316.1  
 1429368\_at, 1430 NP\_796126.4  
 1423660\_at, 1423 NP\_666124.1, NP\_001106941.1  
 1419148\_at NP\_033765.2  
 1432170\_at NP\_079813.1  
     NP\_001191965.1  
 1419122\_at NP\_034922.1  
 1427372\_at NP\_034139.2  
 1427409\_at NP\_001028434.1  
 1422439\_a\_at, 14 NP\_034000.1  
 1416556\_at, 1430 NP\_080258.1  
  
 1426974\_at, 1426 NP\_808282.2, NP\_001164497.1  
 1418655\_at, 1425 NP\_001231546.1, NP\_001231547.1, NP\_032106.1, NP\_082015.2  
     NP\_808283.2  
 1419978\_s\_at, 14 NP\_082303.2, NP\_001159885.1  
 1420752\_at NP\_109639.1  
 \_045716.1  
 1416387\_at, 1416 NP\_473438.1  
 , NM\_001003913.1, NP\_001165053.1, NP\_001003913.1  
     NP\_034426.2  
 1422144\_at NP\_032408.2  
 1434905\_at NP\_001092259.1  
 1426423\_at, 1434 NP\_001239245.1, NP\_082506.1  
 1429753\_at NP\_899120.2  
 1421708\_a\_at, 14 NP\_033310.2  
 1417930\_at NP\_032694.2, NP\_001116367.1  
  
 1436460\_at NP\_001106682.1, NP\_776093.1  
     NP\_932152.1  
 1418554\_at NP\_031438.2  
 1418369\_at NP\_032947.1  
 1416669\_s\_at NP\_038636.2, NP\_001106670.1  
     NP\_062740.1  
 1416829\_at NP\_058054.2  
  
 1427209\_at, 1427 NP\_473419.2, XP\_003945919.1, XP\_003945916.1, XP\_003945918.1, XP\_003945917.1

1435245\_at NP\_001028436.2  
1421039\_at, 1435 NP\_032626.2  
1417586\_at, 1417 NP\_035719.1, NP\_001129554.1, NP\_001157552.1, NP\_001157553.1  
1422577\_at, 1422 NP\_080720.1  
1433628\_at NP\_001074509.1  
NP\_766378.1  
1428382\_at NP\_937803.1, NP\_001107568.1, NP\_001107569.1  
NP\_035973.1  
1418578\_at NP\_058091.2  
, NM\_001253704.1 NP\_001164340.1, NP\_001240633.1, NP\_084376.2, NP\_001240634.1  
1421976\_at, 1421 NP\_067387.1, NP\_001157669.1  
1433820\_a\_at, 14 NP\_835167.1  
1426553\_at NP\_083149.3  
A\_001042580.1 NP\_031679.1, NP\_001036045.1  
1418808\_at NP\_598767.1  
1422614\_s\_at NP\_056555.2  
1418393\_a\_at NP\_032424.2  
1434688\_x\_at NP\_031905.1  
1429739\_a\_at, 14 NP\_062520.1, NP\_001240619.1, NP\_001240620.1  
106630.2  
1428332\_at NP\_835362.2  
1418581\_a\_at NP\_774958.1, NP\_001029202.1, NP\_034848.1  
NP\_663330.2  
1415708\_at, 1426771\_at  
1429532\_at NP\_937805.1, NP\_001152760.1  
A\_001164620.1 NP\_808284.2, NP\_001158092.1  
1419087\_s\_at NP\_080451.4  
NP\_598784.1  
NP\_082298.1  
1427117\_at, 1434 NP\_083136.2  
1430595\_at, 1434 NP\_001177335.1, NP\_001177337.1, NP\_653146.1, NP\_084504.2  
1427975\_at NP\_660251.1  
1417238\_at NP\_031994.2  
1433760\_a\_at NP\_796344.1  
NP\_542162.1  
1421387\_at, 1435 NP\_115772.2  
1435608\_at NP\_001074393.1  
1420011\_s\_at, 14 NP\_038870.2  
NP\_598794.2  
NP\_080356.1  
1430494\_at, 1433 NP\_848738.2, NP\_001071129.1  
1429073\_at  
A\_001146308.1, NP\_038838.1, NP\_001139780.1, NP\_001139781.1  
1422514\_at NP\_033766.2  
NP\_032920.2  
1419146\_a\_at, 14 NP\_034422.2  
NP\_062635.2

NP\_776109.1  
 1423815\_at NP\_080814.1  
 NP\_598781.1  
 , NM\_001252283.1 NP\_001239211.1, NP\_001239212.1, NP\_035086.2, NP\_001239216.1, NP\_001239217  
 A\_001005867.1 NP\_082877.2, NP\_001005867.1  
 1417451\_a\_at NP\_032933.1  
 1419640\_at, 1419 NP\_035351.1  
 1427892\_at NP\_848534.2  
  
 1434648\_a\_at, 14 NP\_001177272.1, NP\_001177273.1, NP\_666126.1  
 1417658\_at NP\_598772.1, NP\_001123929.1, XP\_003945936.1, XP\_003945939.1, XP\_003945938.:  
  
 NP\_035839.3  
 1423062\_at NP\_032369.2  
 NP\_001077056.1  
 1418308\_at, 1425 NP\_032342.1  
 NP\_808244.1  
 1422430\_at NP\_068691.2, NP\_001156831.1, NP\_001156832.1  
 1426215\_at, 1430 NP\_001177377.1, NP\_057881.1  
 1425457\_a\_at, 14 NP\_001171100.1, NP\_034475.2  
 1424932\_at, 1432 NP\_997538.1, NP\_031938.1  
  
 NP\_795956.1  
 NP\_080852.2  
 A\_001193271.1 NP\_034919.1, NP\_001180200.1  
 XM\_003945891.1 XP\_003945521.1, XP\_003945940.1  
 1423001\_at, 1434 NP\_277058.1  
 NP\_666355.1  
 1416082\_at NP\_033022.1  
 1424845\_a\_at, 14 NP\_758464.2  
 1423549\_at, 1423 NP\_061349.3  
 1417209\_at NP\_001033714.1, NP\_067347.2  
 1426861\_at, 1426 NP\_001239432.1, NP\_852076.1  
 1417371\_at, 1417 NP\_075813.2  
 1426460\_a\_at, 14 NP\_647458.1  
 1424586\_at NP\_001239444.1, NP\_694718.4  
 NP\_705824.1  
 A\_001169114.1 NP\_058584.3, NP\_001162585.1  
 1420852\_a\_at NP\_653097.2  
 NP\_035793.1  
 1415867\_at, 1415 NP\_033967.1  
 1418442\_at, 1418 NP\_598775.2, NP\_001030303.1  
 1434392\_at, 1434 NP\_001177330.2  
 1435160\_at NP\_765979.3  
 1420710\_at NP\_033070.2  
 1427241\_at NP\_766143.2  
 035402.1

1419406\_a\_at, 14 NP\_057916.1, NP\_001152761.1, NP\_001152762.1, NP\_001229863.1  
 1\_003689261.1, XM NP\_082145.1, XP\_003689309.1, XP\_003945944.1, XP\_003945946.1, XP\_003945945.1  
 168477.1  
 1423197\_a\_at, 14 NP\_598795.2  
 1436025\_at NP\_789811.2  
 1415685\_at NP\_598528.2  
 A\_001033865.1 NP\_077239.1, NP\_001029037.1  
 A\_001163521.1 NP\_082780.1, NP\_001156993.1  
 1421116\_a\_at, 14 NP\_077188.1, NP\_918941.1, NP\_918943.1, NP\_918940.1, NP\_918942.1  
 168694.1  
  
 1427943\_at NP\_083620.1  
 1426823\_s\_at, 14 NP\_598774.2  
 1419503\_at NP\_035621.1  
 1421570\_at NP\_032400.1, NP\_001127930.1  
 1428004\_at NP\_084369.2  
 1424138\_at NP\_034247.2  
 1417571\_at, 1417 NP\_034952.2  
 1433548\_at NP\_853547.1  
 NP\_034535.1  
 NP\_776145.2  
 1429746\_at NP\_081307.2  
 1417751\_at NP\_033314.2  
 NP\_032031.1  
 , NM\_001252261.1 NP\_001239189.1, NP\_001239190.1, NP\_032748.1  
 NP\_064300.2  
 1421020\_at NP\_075635.1  
 1424971\_at NP\_081687.2  
 1426259\_at, 1433 NP\_666074.1  
 1416312\_at NP\_080212.2  
 1420007\_at, 1420 NP\_740749.1  
 1420718\_at, 1432 NP\_035986.3  
 A\_001199274.1 NP\_598778.1, NP\_001186203.1  
 1425815\_a\_at, 14 NP\_038580.2  
 1418566\_s\_at NP\_080299.4  
 1419620\_at, 1424 NP\_038945.2, NP\_001124526.1  
 1420030\_at, 1425 NP\_683514.2, NP\_945174.1  
 NP\_001038995.1  
 1415788\_at, 1415 NP\_077795.2, XP\_003945933.1  
 A\_001166553.1 NP\_083138.2, NP\_001160025.1  
 1416301\_a\_at, 14 NP\_031923.1  
  
 NP\_001038985.2  
 NP\_082461.1  
 1432393\_a\_at NP\_001074438.1  
 1428347\_at NP\_001239388.1, NP\_001239389.1, NP\_598530.2  
 1417564\_at NP\_079702.3, NP\_001098000.1, NP\_001098026.1, NP\_001098027.1

NP\_032169.1

1424275\_s\_at NP\_663352.2

1421398\_at, 1425 NP\_444396.2

141631.1

NP\_666388.1

1436233\_at NP\_766381.1

1425495\_at NP\_001020017.1, NP\_033588.2

1426682\_at, 1426 NP\_997649.1

1418753\_at NP\_038557.1

1421876\_at, 1421 NP\_997575.2, NP\_058657.1, NP\_001157143.1, NP\_001157144.1

1428596\_at, 1428 NP\_084021.2

NP\_080819.2

NP\_035148.1

1424720\_at NP\_666038.3

1419692\_a\_at NP\_032547.1

1426769\_s\_at NP\_780543.2

1415692\_s\_at, 14 NP\_031623.1, NP\_001103969.1, NP\_001103970.1

1415872\_at NP\_067485.1

1435990\_at NP\_783574.1

1436433\_at NP\_808235.1

1422886\_a\_at, 14 NP\_031740.1

1424745\_at NP\_082674.1

1415914\_at, 1426 NP\_034578.1, NP\_001041526.1

1416605\_at, 1416 NP\_080907.1

1424163\_at NP\_079622.1

NP\_666086.2

1419893\_at

1433934\_at NP\_780464.2

1428163\_at NP\_079811.1

1430081\_at NP\_955003.2

1423106\_at, 1423 NP\_033484.3

1435506\_at NP\_722480.3, NP\_001160125.1, NP\_001160126.1, NP\_001160127.1, NP\_001160128

1417367\_at NP\_062284.1

1423148\_at, 1423 NP\_035673.3

168697.1

1433471\_at NP\_033357.1

106224.1

1415998\_at NP\_035824.1

NP\_796033.2

1416146\_at, 1416 NP\_032326.3

1420912\_at NP\_291043.1

141633.1

NP\_082193.2

035252.2

NP\_898996.2

106225.1  
106226.1  
1420375\_at, 1436 NP\_032469.2  
1422630\_at, 1425 NP\_033038.2  
^\_001159393.1, NP\_032416.1, NP\_001152865.1, NP\_001152868.1  
NP\_062697.1  
1417639\_at NP\_062661.1  
1419924\_at, 1434 NP\_776114.2  
NP\_848741.1  
1430821\_at NP\_083603.2  
1424017\_a\_at, 14 NP\_032274.1  
1427689\_a\_at NP\_001186204.1, NP\_067302.2, NP\_001186205.1  
1415818\_at, 1429 NP\_038500.2, NP\_001103681.1  
1416188\_at NP\_034429.1  
  
1428793\_at NP\_694779.3  
1424253\_at NP\_080618.1, NP\_001162138.1, NP\_001162139.1  
1424721\_at, 1434 NP\_850930.1, NP\_663401.2  
1418194\_at, 1418 NP\_598950.2  
1430794\_at  
1415718\_at NP\_001074637.1  
1428244\_at NP\_082727.1  
1436310\_at, 1436 NP\_766146.2, NP\_001160141.1, NP\_001160142.1, NP\_001160143.1  
1435995\_at NP\_778166.2  
1434031\_at NP\_001035776.1, NP\_892041.2  
1424261\_at NP\_001243445.1, NP\_001243446.1, NP\_848876.2, NP\_001243447.1, NP\_001243448  
1427507\_at NP\_112449.1  
106232.1  
1419630\_a\_at NP\_444398.1  
1435214\_at NP\_536702.3, NP\_780661.2  
1416395\_at NP\_032219.2, NP\_001152882.1  
1431141\_at  
1429453\_a\_at NP\_080311.1  
1418999\_at NP\_077172.1  
1420920\_a\_at, 14 NP\_031502.1, NP\_001123880.1  
1434088\_at NP\_766529.3, NP\_001124001.1  
  
^\_012027.2 NP\_957697.1, NP\_036157.2  
1416678\_at NP\_036121.1  
NP\_598790.1  
1419377\_at NP\_619616.2  
1423619\_at NP\_033052.1  
NP\_032845.2  
1420454\_at NP\_001032853.1, NP\_033047.2  
  
1426690\_a\_at NP\_035610.1  
1426474\_at NP\_663402.2



1420661\_a\_at, 14 NP\_080033.3  
1421615\_at NP\_034992.2, NP\_874357.2, NP\_001096641.1  
1434701\_at NP\_766531.2  
1416621\_at NP\_032528.1, NP\_001152876.1, NP\_001152877.1  
1416044\_at NP\_071292.1  
1434072\_at NP\_001009927.1

1\_001168507.1 NP\_775655.1, NP\_001161979.1  
1417477\_at NP\_079570.1  
1419203\_at  
NP\_001004143.2  
1415776\_at NP\_031463.2  
NP\_001028714.1  
1418395\_at NP\_080459.2  
XP\_895812.1  
1424010\_at NP\_083844.1  
1418060\_a\_at NP\_035971.1  
1430478\_at  
1417596\_at NP\_038745.1  
1427225\_at, 1427 NP\_001239117.1, NP\_001239118.1, NP\_034278.1  
1417846\_at, 1417 NP\_038909.3  
1421121\_at, 1428 NP\_064305.2  
XP\_003945690.1  
1428794\_at NP\_001025107.1  
1434430\_s\_at, 14 NP\_031439.2  
1423200\_at, 1423 NP\_001239242.1, NP\_035438.3, NP\_796203.1  
NP\_001034625.1  
106243.1  
NP\_035794.1  
1416935\_at NP\_035836.2

1436195\_at NP\_942561.1  
NP\_778167.1  
NP\_001028841.2  
NP\_080486.1  
1417133\_at NP\_032911.1  
1421331\_at, 1421 NP\_061275.2

1435622\_at NP\_849201.1  
1426233\_at NP\_033183.1  
NP\_001093103.1  
NP\_001030046.1  
NP\_780469.1

NP\_796034.2  
NP\_033106.1  
1423655\_a\_at, 14 NP\_001013274.2, NP\_001137262.1  
1424128\_x\_at NP\_035626.1  
1428723\_at NP\_082281.2  
1429058\_at, 1429 NP\_080114.1, NP\_082612.2  
1420833\_at, 1420 NP\_033523.1  
^\_001159367.1 NP\_035195.2, NP\_001152839.1  
141640.2  
1422950\_at NP\_149030.2  
NP\_035916.2  
1422193\_at NP\_032218.2  
1433958\_at NP\_766148.2  
1436019\_a\_at NP\_001019377.1  
1421790\_a\_at, 14 NP\_034729.3  
1418100\_at  
1428466\_at NP\_666131.3  
1436270\_at NP\_001038990.1  
1428526\_at NP\_084359.1  
NP\_080191.3  
NP\_001017426.1  
NP\_001074799.1  
1423085\_at NP\_031937.1  
1423808\_at NP\_659073.1  
1422009\_at, 1435 NP\_038201.1  
1421602\_at NP\_035497.1  
1430318\_at NP\_081267.1  
1422522\_at NP\_035944.2  
  
1416104\_at NP\_036030.2  
  
NP\_033983.1  
1427058\_at, 1430 NP\_659207.1, NP\_001152847.1  
^\_001163571.1 NP\_109627.3, NP\_001157043.1  
  
^\_001159505.1 NP\_076006.2, NP\_001152977.1  
1418345\_at NP\_001029269.1, NP\_001152975.1  
NP\_035744.1  
1422311\_a\_at, 14 NP\_033115.1  
1418958\_at NP\_063924.2  
1429722\_at NP\_083624.2  
1420682\_at NP\_033731.3  
1421793\_at NP\_034328.1  
NP\_001028605.2  
  
NP\_780577.1  
1431384\_at NP\_083131.1

NP\_942562.2  
 NP\_001182639.1  
 NP\_694783.1  
 1434873\_a\_at, 14 NP\_722483.2  
 1430178\_at NP\_081695.2  
 1430417\_s\_at NP\_001013432.1  
 1417796\_at NP\_062700.2  
 , NM\_001166590.1 NP\_001160061.1, NP\_001160062.1, NP\_001160063.1, NP\_001160064.1, NP\_001160065.1  
 1431411\_a\_at NP\_061210.2, NP\_001240629.1  
 NP\_080293.1  
 1416937\_at NP\_062723.1  
 1428997\_at NP\_084340.2  
 1417207\_at NP\_031914.3  
 1424184\_at NP\_059062.1  
 1427107\_at NP\_694721.2  
 NP\_758959.1  
 1418421\_at NP\_031554.1

1428679\_s\_at, 14 NP\_001171072.1, NP\_001171074.1, NP\_081033.1, NP\_001171077.1, NP\_001171078  
 1426745\_at NP\_776103.1  
 1422699\_at, 1422 NP\_031466.2  
 1425042\_s\_at NP\_083507.3  
 1426239\_s\_at NP\_663404.1  
 1424445\_at NP\_083636.2  
 NP\_001013625.1  
 NP\_666132.1  
 NP\_032972.3  
 1417237\_at NP\_032902.1  
 , NM\_176893.2, NP\_001039429.1, NP\_795712.2, NP\_057922.2, NP\_001039424.1  
 1422316\_at NP\_034456.2  
 1426586\_at NP\_077173.1  
 1430527\_a\_at NP\_081721.1  
 NP\_035202.1  
 1417951\_at NP\_031959.1, NP\_001129534.1  
 1433940\_at NP\_766149.2, NP\_001161141.1  
 1426901\_s\_at NP\_001177305.1, NP\_001177307.1, NP\_835217.1, NP\_001177308.1  
 , NM\_001252482.1, NP\_998894.1, NP\_001239411.1, NP\_001239412.1, NP\_001239413.1, NP\_001239414  
 1424746\_at, 1424 NP\_694743.2  
 NP\_808233.1  
 1421305\_x\_at, 14 NP\_062273.2  
 1428073\_a\_at NP\_765982.2, NP\_001076800.1  
 1428828\_at NP\_001239342.1, NP\_001239343.1, NP\_081462.1, NP\_001239344.1  
 NP\_031599.2  
 1429191\_at NP\_848144.3  
 1435101\_at NP\_291040.1  
 1433998\_at NP\_083239.1

1423034\_at, 1423 NP\_080835.1  
1417387\_at NP\_080344.2  
1430763\_at NP\_001157200.1  
NP\_808444.1  
NP\_082095.2  
1423430\_at, 1423 NP\_058056.2  
NP\_694700.2  
1429140\_at NP\_084208.1  
1415688\_at NP\_080261.2  
NP\_001020097.2  
1434192\_at NP\_001039001.1  
1421129\_a\_at NP\_058025.2, NP\_001156808.1, NP\_001156809.1  
1429794\_a\_at NP\_032797.3  
1418954\_at NP\_061371.2  
1423118\_at NP\_080094.3  
A\_008399.2 NP\_766532.1, NP\_032425.2  
NP\_034483.1  
NP\_201578.2  
1417912\_at NP\_079594.1, NP\_001161942.1  
NP\_083840.1  
1416274\_at NP\_112541.1  
1433673\_at NP\_001013806.1  
1428106\_at NP\_001074627.1  
1417086\_at, 1427 NP\_038653.1  
1418192\_at, 1418 NP\_034943.3  
NP\_922934.2  
1433502\_s\_at NP\_796299.2  
  
1419664\_at NP\_038789.1, NP\_001156783.1  
1425883\_at, 1433 NP\_001002764.1  
A\_001098203.1 NP\_034560.2, NP\_001091673.1  
  
NP\_081412.1  
1418335\_a\_at NP\_652762.2  
NP\_808376.1  
1423293\_at NP\_080929.1, NP\_001157695.1  
NP\_001096081.1  
NP\_620400.2  
1428562\_at  
  
1432282\_a\_at NP\_081525.1  
1422453\_at NP\_619600.2  
NP\_001025109.1  
1434490\_at NP\_001004157.2  
1434308\_at NP\_775564.1, NP\_001186213.1, NP\_001186212.1  
1423282\_at, 1423 NP\_032876.1

1419648\_at, 1419 NP\_001074244.1, NP\_001074243.1, NP\_032685.1  
1416201\_at, 1425 NP\_598417.2  
1426384\_a\_at, 14 NP\_033562.3  
1420666\_at, 1420 NP\_031899.2  
1429764\_at, 1429 NP\_083934.1  
1435076\_at NP\_082049.1  
1433622\_at NP\_796341.2  
1421864\_at, 1421 NP\_067269.1  
1428421\_a\_at NP\_080305.2  
1422465\_a\_at, 14 NP\_032776.1  
^\_023355.1 NP\_062792.2, NP\_075844.1  
1433477\_at NP\_932135.1, NP\_942597.1, NP\_942598.1  
1418018\_at, 1418 NP\_031780.2  
NP\_848760.1  
NP\_808378.2  
1426122\_a\_at, 14 NP\_624354.1, NP\_624355.1, NP\_624356.1  
NP\_766533.2  
NP\_001004144.1  
NP\_001020091.1  
NP\_080461.3  
XM\_003945911.1 XP\_003945693.1, XP\_003945960.1  
1428583\_at, 1435 NP\_001019376.1  
1420885\_a\_at, 14 NP\_067261.2  
1434922\_at NP\_777277.2  
106205.1  
NP\_899109.2  
1417544\_a\_at NP\_032054.1, NP\_001035493.1  
1424663\_at, 1424 NP\_663405.1  
1416571\_at NP\_033449.2  
NP\_543125.1  
1426616\_at, 1430 NP\_080984.1  
NP\_997406.1  
  
1416590\_a\_at, 14 NP\_258436.2, NP\_001152954.1  
NP\_001038981.2  
1417628\_at, 1430 NP\_033323.2  
1416857\_at NP\_033169.3  
1426820\_at NP\_001002004.2  
1427498\_a\_at, 14 NP\_059103.1  
1424714\_at NP\_033787.2  
1433429\_at NP\_958808.1  
1418123\_at NP\_035806.1  
1426714\_at, 1426 NP\_081016.2  
1435466\_at NP\_001161993.1, NP\_766383.2  
1420484\_a\_at NP\_035837.1

NP\_032785.1  
1433629\_s\_at NP\_954669.2  
1422732\_at NP\_080665.1  
1417865\_at, 1417 NP\_033421.3, NP\_001152864.1  
1419823\_s\_at NP\_038599.1  
1425241\_a\_at NP\_062627.3, NP\_001036030.1  
NP\_035027.1  
1434156\_at NP\_780752.1

NP\_061246.1  
1435597\_at NP\_001025027.1  
NP\_082295.1  
1423533\_a\_at NP\_067511.4, NP\_001156826.1, NP\_001156827.1  
1427579\_at, 1435 NP\_631974.1  
NP\_081748.1  
1423545\_a\_at, 14 NP\_001123641.1, NP\_001123642.1, NP\_001123643.1, NP\_035881.1  
1429370\_a\_at, 14 NP\_848731.2  
1421123\_at, 1421 NP\_034001.1  
1435463\_s\_at NP\_796364.2  
106214.1  
1423419\_at, 1425 NP\_034846.2  
1430915\_at NP\_084500.1  
1424731\_at NP\_663406.2  
NP\_848795.3

1416259\_at NP\_598786.1  
1427077\_a\_at NP\_001030931.1, NP\_082191.1  
1424219\_at NP\_663408.2  
1425704\_at NP\_808232.2

1426011\_a\_at NP\_694784.2  
1\_001077636.1 NP\_081664.2, NP\_001071104.1  
NP\_079690.2  
NP\_001005223.1  
1434039\_at, 1434 NP\_080101.1  
1430265\_at  
1434142\_at NP\_058606.3  
1423528\_at, 1428 NP\_619622.3, NP\_001160114.1, NP\_001160115.1

1422545\_at NP\_033350.2  
NP\_840094.1  
1429461\_at, 1436 NP\_081697.2  
NP\_001074400.1  
1428849\_at NP\_082535.1, NP\_001107806.1

1421748\_a\_at NP\_001185974.1, NP\_062730.1, NP\_001185975.1, NP\_001185976.1  
NP\_001003908.1  
1434277\_a\_at NP\_001005341.1  
1427737\_a\_at NP\_077224.1  
NP\_780772.1  
1423440\_at NP\_079653.1

1434554\_at, 1435 NP\_932104.1  
1434990\_at NP\_796141.2  
1418258\_s\_at, 14 NP\_080832.1, NP\_001161943.1, NP\_001161944.1  
168615.1  
1428099\_a\_at, 14 NP\_775550.2, NP\_001071635.1  
1429084\_at, 1429 NP\_057895.2

1425920\_at, 1435 NP\_001165570.1, NP\_932130.2  
1421874\_a\_at, 14 NP\_077136.2  
1421230\_a\_at, 14 NP\_473384.1, NP\_001188270.1

1418279\_a\_at NP\_001036006.1, NP\_033778.2  
1416692\_at NP\_057915.2  
1419879\_s\_at, 14 NP\_033572.2  
1423000\_a\_at, 14 NP\_062378.1  
140412.1, XR\_035174.4  
1422300\_at NP\_032737.1  
NP\_035635.1  
1429188\_at NP\_950173.1  
NP\_082287.1  
NP\_001013393.1  
1417261\_at NP\_598773.2  
, NM\_008705.4 NP\_001070997.1, NP\_032731.1  
1424110\_a\_at, 14 NP\_032730.1  
1430556\_at, 1433 NP\_081845.2, NP\_001020600.1, NP\_001020599.1, NP\_001020601.1, NP\_001186132  
1423176\_at NP\_033453.2  
1428811\_at NP\_861540.2  
1424802\_a\_at NP\_080589.1  
1435322\_at NP\_082075.2, NP\_666136.1  
1423365\_at NP\_001106284.1, NP\_001171359.1, NP\_033913.2, NP\_001171361.1  
NP\_659076.2  
1424960\_at NP\_082260.1  
1424363\_at NP\_733771.2  
1420321\_at NP\_001013399.1  
1425355\_at NP\_722502.1  
1416234\_at, 1416 NP\_598568.1  
NP\_665827.2  
NP\_758465.2  
NP\_666137.1  
1420458\_at NP\_444323.1

1419710\_at NP\_570928.1  
1421241\_at NP\_150086.2

NP\_694744.1  
^\_001163464.1 NP\_079935.1, NP\_001156936.1  
1423949\_at, 1436 NP\_758504.3  
1416020\_a\_at NP\_031532.2, NP\_001154891.1

NP\_034591.1  
1427494\_at NP\_034590.2  
1427605\_at NP\_001073338.1, NP\_034588.2  
NP\_598793.2  
1416331\_a\_at NP\_032712.2, NP\_001123922.1, NP\_001123923.1, NP\_001123924.1, NP\_001123925  
1418455\_at NP\_063930.1

1423067\_at NP\_084524.1

1426237\_at NP\_084496.2, NP\_001074433.1  
1427786\_at, 1427 NP\_112460.1  
1436012\_s\_at NP\_666139.1  
1431389\_at, 1435 NP\_932768.2  
1416925\_at, 1434 NP\_032405.3  
1417385\_at, 1417 NP\_032968.2  
1420766\_at, 1434 NP\_619598.1  
1419745\_at, 1419 NP\_067468.2

1426980\_s\_at NP\_780541.2  
1425360\_at, 1433 NP\_647472.2  
NP\_001078969.2  
1420645\_at NP\_033571.1, NP\_001156779.1, NP\_001156780.1  
1417052\_at NP\_036101.1  
1427438\_at, 1435 NP\_473392.1  
1428759\_s\_at, 14 NP\_080462.2  
1430091\_at NP\_082432.2  
NP\_075029.1

NP\_034818.1  
1424902\_at NP\_082475.3, NP\_001157080.1  
NP\_997114.1  
1425777\_at, 1426 NP\_112450.1, NP\_660099.2, NP\_001152791.1, NP\_001152792.1  
^\_001159483.1 NP\_033104.2, NP\_001152955.1  
1424581\_at NP\_666140.1  
1418419\_at NP\_082425.1  
1421906\_at, 1421 NP\_001073587.1, NP\_038662.2, NP\_598788.2  
1425555\_at, 1425 NP\_001103096.1, NP\_001103098.1, NP\_081228.2  
1418995\_at, 1435 NP\_035025.3



1424919\_at NP\_001003817.1  
NP\_079937.1  
1423634\_at NP\_067322.1  
NP\_033465.1  
1426997\_at NP\_835161.1  
1426464\_at NP\_663409.2  
1428871\_at, 1428 NP\_082998.2  
  
1416736\_at NP\_619601.2  
NP\_001176528.1, NP\_033050.2, NP\_001169999.1, NP\_001170773.1, NP\_001170774.1  
NP\_848711.2  
1421991\_a\_at, 14 NP\_034647.1  
1422675\_at, 1422 NP\_065643.1  
1434535\_at NP\_766534.1  
NP\_789800.1  
1415951\_at NP\_001156953.1, NP\_034351.2  
1430559\_at NP\_080837.3, NP\_001096120.1  
1423497\_at NP\_080003.1  
1427218\_at NP\_766153.1  
1425326\_at NP\_598798.1, NP\_001186225.1  
NP\_062769.2  
1424416\_at NP\_082300.1  
NP\_808458.2  
1420768\_a\_at, 14 NP\_084426.2  
1422971\_at, 1422 NP\_001033099.1, NP\_064388.2  
NP\_083583.1  
1424684\_at NP\_077776.2  
1422102\_a\_at, 14 NP\_035619.3, NP\_001107035.1  
1421469\_a\_at NP\_035618.1, NP\_001157534.1  
1421431\_at, 1424 NP\_033012.1  
1417632\_at, 1425 NP\_001229978.1, NP\_001229979.1, NP\_058616.1, NP\_001229980.1  
1417706\_at NP\_038820.2  
NP\_034605.1  
1423701\_at NP\_082172.2  
1418437\_a\_at, 14 NP\_035680.3, NP\_001152856.1, NP\_001152857.1  
1425271\_at NP\_032975.1  
1424159\_at, 1431 NP\_080777.1, NP\_083209.1  
1417144\_at NP\_598785.1  
1420248\_at NP\_598789.1  
NP\_666142.1  
1421420\_at NP\_031747.2  
1421580\_at NP\_058062.2  
1418290\_a\_at, 14 NP\_031996.1  
1418187\_at NP\_062317.1  
1421051\_s\_at, 14 NP\_081052.2  
1427196\_at NP\_783569.1  
1418078\_at, 1418 NP\_035322.1

NP\_849263.1  
1424006\_at, 1432 NP\_659078.1  
NP\_081141.1  
NP\_766154.2  
1416099\_at NP\_035419.1  
1424617\_at NP\_081596.1  
1423726\_at NP\_036167.1  
1422670\_at NP\_033838.1

1418250\_at NP\_079680.1  
1425608\_at, 1434 NP\_082483.1  
1430121\_at NP\_083563.1  
1427998\_at, 1429 NP\_766535.1  
1428245\_at NP\_787949.2  
1415743\_at NP\_001071164.1, NP\_034542.3  
1434711\_at NP\_705772.3  
NP\_082352.1  
1435019\_at NP\_001092307.1, NP\_001092306.1  
, NM\_011551.5 NP\_001037848.1, NP\_035681.2  
1436674\_at NP\_001239276.1, NP\_058039.1  
NP\_080818.1  
NP\_032201.2  
1436403\_at NP\_954670.2  
1417758\_at NP\_034705.2  
1424665\_at, 1424 NP\_001152964.1  
1418532\_at, 1418 NP\_065256.1  
1418543\_s\_at NP\_080194.1  
^\_001110778.1 NP\_033743.2, NP\_001104248.1  
1416557\_a\_at NP\_035561.1, NP\_001103465.1  
NP\_082768.1  
1421585\_at NP\_080042.1  
1426508\_at, 1426 NP\_034407.2, NP\_001124492.1  
NP\_932063.2  
NP\_080827.2

1431892\_a\_at NP\_690026.2  
1428271\_at NP\_080264.1  
1419359\_at, 1425 NP\_620092.1  
1429025\_a\_at, 14 NP\_081934.1, NP\_001123987.1, NP\_001123988.1  
, NM\_019679.2 NP\_001071166.1, NP\_062653.2  
1436408\_at NP\_001028384.1  
1419371\_s\_at, 14 NP\_062624.2  
106606.2  
NP\_033547.1  
1416458\_at, 1416 NP\_031503.1  
1417885\_at, 1424 NP\_001033698.1, NP\_034968.3  
1432430\_a\_at NP\_001074514.1

1429445\_at NP\_001074515.1  
1435713\_at NP\_766155.3  
1429136\_at  
1416944\_a\_at, 14 NP\_001106176.1, NP\_036033.2  
1421044\_at, 1421 NP\_032652.3  
1\_001039242.2 NP\_766156.2, NP\_001034331.1  
1435078\_at, 1436 NP\_851416.2  
1417507\_at NP\_031831.2  
NP\_001032801.1  
1429151\_at, 1429 NP\_082222.1  
NP\_081622.1  
1426686\_s\_at, 14 NP\_036077.1  
1424636\_at, 1424 NP\_080285.2  
1427022\_at NP\_082350.3  
1415740\_at NP\_032976.1  
1426192\_at NP\_114084.2, NP\_001123659.1  
1421540\_at, 1435 NP\_083743.2  
NP\_938034.2  
1\_027785.1 NP\_056625.2  
1419653\_a\_at, 14 NP\_031866.2  
  
1436572\_at, 1436 NP\_796062.2, NP\_001160157.1  
1429045\_at, 1429 NP\_079757.2  
1415860\_at NP\_034785.1  
1423479\_at, 1423 NP\_598463.2, NP\_001154801.1  
1428025\_s\_at, 14 NP\_665822.1  
NP\_080170.1  
1\_986896.1 XP\_925609.2, XP\_991990.1  
1427469\_at NP\_938040.1  
NP\_062304.1  
1427562\_a\_at NP\_035231.2  
1427205\_x\_at, 14 NP\_083882.3, NP\_663721.2, NP\_083862.1  
1421341\_at NP\_056547.3  
  
1422555\_s\_at, 14 NP\_034433.3  
1417884\_at NP\_001025013.1, NP\_598799.1  
1427002\_s\_at NP\_082986.3, NP\_001159649.1  
1424917\_a\_at, 14 NP\_666052.1  
1425550\_a\_at NP\_068680.1  
1424950\_at, 1433 NP\_035578.3  
141602.1  
1418354\_at NP\_038609.3  
1418887\_a\_at NP\_613064.2  
NP\_808445.2  
1416511\_a\_at NP\_064390.1, NP\_001156818.1  
1430425\_at NP\_766388.2

1433472\_x\_at NP\_075861.1, NP\_001041523.1, NP\_001041522.1  
 NP\_444503.2  
 1424450\_at NP\_001103807.1, NP\_671750.2, NP\_001103808.1  
 NP\_001028565.1  
 NP\_034480.2  
 1423914\_at NP\_780663.1  
 NP\_001074398.1  
 NP\_081005.1  
 1423676\_at, 1435 NP\_082138.1  
 NP\_899108.3  
 1434473\_at NP\_001074403.1  
 1424446\_at NP\_808446.1  
 1417252\_at NP\_056622.1  
 1416028\_a\_at NP\_032284.1  
 1415782\_at NP\_579932.1  
 , NM\_173048.3 NP\_001238996.1, NP\_766636.2  
 NP\_079581.1  
 ^\_001243584.1, NI NP\_081438.4, NP\_001230513.1, NP\_001230515.1, NP\_001230516.1  
 1424316\_at, 1424 NP\_001239313.1, NP\_001239323.1, NP\_080347.1, NP\_001239324.1, NP\_001239325  
 1426984\_at NP\_082290.2  
 NP\_542374.2  
 1429529\_at NP\_083833.1  
 1423938\_at NP\_663413.2, NP\_001239461.1  
 XM\_003945651.1 XP\_003945930.1, XP\_003945700.1  
 1427387\_a\_at NP\_001005608.2, NP\_598424.2  
 1417177\_at NP\_058601.2  
 1430357\_at NP\_032237.1  
 1426681\_at NP\_766157.1  
 1426784\_at NP\_001192010.1, NP\_766158.3  
 NP\_848917.2  
 1430610\_at NP\_077139.2  
 1425979\_a\_at NP\_766159.3  
 1419133\_at NP\_079552.3  
 1433708\_at NP\_666144.3  
 1422942\_at NP\_034384.3  
 1425291\_at NP\_032266.3  
 1434427\_a\_at, 14 NP\_081534.1  
 NP\_795876.1  
 NP\_001028439.1  
 1428182\_at NP\_080640.1  
 , NM\_001172473.1 NP\_001165943.1, NP\_001165944.1, NP\_035581.1, NP\_079643.2, NP\_001165946.1  
 1433765\_at NP\_776116.2  
 1434774\_at NP\_766160.2, NP\_001161152.1  
 1423630\_at NP\_084482.1  
 1436657\_at NP\_001156790.1  
 1430539\_at NP\_080556.1  
 1420056\_s\_at, 14 NP\_203971.2

1430331\_at NP\_083141.3  
 1415807\_s\_at, 14 NP\_035488.1  
 1427815\_at NP\_848735.1  
 A\_001166506.1, NINP\_083053.2, NP\_001159978.1, NP\_001159979.1  
 1417038\_at NP\_059076.1, NP\_001106958.1, NP\_001106959.1, NP\_001106960.1  
 1424645\_at NP\_932139.2  
 1423770\_at NP\_851838.1, NP\_663414.3  
 , NM\_001195089.1 NP\_001182017.1, NP\_001182018.1, NP\_862904.1, NP\_001182019.1  
 1431194\_at NP\_084240.1  
 1417081\_a\_at NP\_033330.1  
 1416258\_at NP\_033413.2  
 1428885\_at, 1431 NP\_082103.1  
 1424278\_a\_at NP\_033819.1, NP\_001012273.1  
 NP\_001079004.1  
 1428780\_at NP\_082195.2  
 106370.1  
 1416576\_at NP\_031733.1  
 1430429\_at NP\_598518.1  
 1420924\_at, 1433 NP\_035724.2  
 1421476\_a\_at, 14 NP\_001020788.1, NP\_001020789.1, NP\_083778.2, NP\_001254520.1, NP\_001254521  
 A\_001204129.1, NINP\_064343.1, NP\_001191058.1, NP\_001191059.1  
 1422059\_at, 1434 NP\_031649.2  
 1419198\_at, 1419 NP\_038954.1  
 1419583\_at NP\_031651.2  
 1435763\_at NP\_766031.2  
 NP\_780639.1  
 1417242\_at NP\_619610.1  
 NP\_570956.1  
 1422988\_at NP\_061292.2  
 NP\_848858.2  
  
 XM\_001477846.3 XP\_001476701.2, XP\_001477896.2  
 A\_001164636.1 NP\_796368.1, NP\_001158108.1  
 1422130\_at, 1434 NP\_032756.1  
  
 1430784\_a\_at, 14 NP\_083174.2  
 1433684\_at NP\_001078967.1  
 1425656\_a\_at, 14 NP\_570932.2, NP\_001032843.1, NP\_001032844.2  
 1416936\_at NP\_001185714.1, NP\_001185716.1, NP\_031403.2  
  
 035443.1  
 1429510\_at  
 NP\_940815.3  
 1436633\_at  
 1415779\_s\_at NP\_033739.1

NP\_766390.2  
NP\_082256.2  
A\_001195023.1 NP\_955763.1, NP\_001181952.1  
1426588\_at NP\_663338.2  
1425100\_a\_at NP\_036197.1  
NP\_079836.1  
1424533\_a\_at NP\_690020.1  
NP\_932112.2  
1416540\_at NP\_001152800.1, NP\_032270.3  
NP\_081480.2  
141612.1  
1416954\_at, 1416 NP\_038798.2  
NP\_032127.2  
NP\_001028403.1  
1431281\_at NP\_081090.1  
NP\_035162.1  
NP\_598557.3  
1422993\_s\_at NP\_035698.1  
1417326\_a\_at NP\_001033319.1, NP\_079665.1  
NP\_695020.1  
1420493\_a\_at NP\_077191.2  
1424238\_at NP\_694696.2  
1434054\_at NP\_034886.1  
1424556\_at NP\_659044.1  
1423912\_at NP\_081153.1, NP\_937866.1, NP\_001157696.1  
1416553\_at NP\_057874.2  
NP\_705773.2  
1420554\_a\_at NP\_573486.1  
1419456\_at NP\_080704.2  
1418509\_at NP\_031647.1  
1421160\_a\_at NP\_033079.1  
1415699\_a\_at NP\_001171345.1, NP\_663345.2  
1423943\_at, 1435 NP\_081100.2  
1423828\_at NP\_032014.3  
1429852\_at NP\_082021.1  
A\_001038653.1, NP\_109621.1, NP\_001033742.1, NP\_001033743.1  
1415825\_s\_at, 14 NP\_082150.1, NP\_620690.1  
1417482\_at NP\_082878.2  
1418331\_at NP\_079678.1  
1434844\_at NP\_001001333.2, NP\_001139545.1  
1416281\_at NP\_080069.2  
1425756\_at, 1436 NP\_631886.2  
1418311\_at NP\_071297.1, NP\_001033788.1  
NP\_084154.1  
1424356\_a\_at NP\_659046.1  
1422664\_at, 1429 NP\_057885.1  
1429484\_at

, NM\_172421.5 NP\_001257917.1, NP\_766009.2  
A\_001162465.1, NINP\_031912.2, NP\_001155937.1  
1423063\_at, 1423 NP\_714965.1, NP\_031898.1  
1421959\_s\_at, 14 NP\_612178.2, NP\_001153008.1, NP\_001153009.1  
1418594\_a\_at, 14 NP\_035011.1  
NP\_058559.3  
, NM\_173416.3 NP\_001164329.1, NP\_775592.2  
1425019\_at, 1425 NP\_663416.1  
1428982\_at NP\_001093098.1  
1434639\_at NP\_001157965.1  
1418015\_at, 1418 NP\_109648.2, NP\_001153691.1, NP\_001153692.1, NP\_001153693.1, NP\_001153694  
1415943\_at, 1415 NP\_035649.1  
1423368\_at NP\_032666.2  
NP\_035989.1  
1427715\_a\_at NP\_081864.2  
1417438\_at NP\_076186.1  
1436654\_at NP\_796305.3  
1417736\_at, 1422 NP\_079971.2  
NP\_001104588.1  
1417155\_at, 1425 NP\_032735.3  
1415915\_at NP\_598801.1  
1426640\_s\_at, 14 NP\_653134.2  
1417151\_a\_at NP\_032773.2  
1419593\_at NP\_001239000.1, NP\_056579.2  
\_027677.1 NP\_150373.2  
1423592\_at NP\_033098.2  
1423648\_at, 1430 NP\_082235.1, XP\_003689316.1  
1427364\_a\_at NP\_038642.2  
NP\_057886.1  
1422855\_at NP\_061283.2  
1429119\_at NP\_080623.2  
1421857\_at, 1421 NP\_033745.4  
NP\_848134.1  
1416120\_at, 1434 NP\_033130.1  
1430449\_at, 1433 NP\_001074847.1  
1421242\_at, 1421 NP\_001075446.1, NP\_542130.1  
1422095\_a\_at NP\_065582.3  
1429051\_s\_at, 14 NP\_033260.4  
1419364\_a\_at, 14 NP\_035430.1  
NP\_035405.2  
1428259\_at NP\_852060.2  
1424113\_at, 1424 NP\_032508.2  
1423159\_at, 1433 NP\_031887.2  
1419725\_at NP\_035997.1  
1432143\_a\_at NP\_694878.2, NP\_818774.2  
1430640\_a\_at NP\_035288.2

1429100\_at NP\_001156375.1  
1430246\_at  
1422879\_at, 1422 NP\_942003.1, NP\_038663.2  
1428633\_at, 1428 NP\_758457.1  
1418733\_at NP\_035788.1  
1435251\_at NP\_001014973.2  
141666.1  
1422631\_at NP\_038492.1  
1423456\_at NP\_080116.2  
1425482\_s\_at, 14 NP\_666145.3  
1428286\_at  
1430316\_at NP\_848744.2  
1422607\_at NP\_001156626.1, NP\_031986.1  
1425411\_at, 1431 NP\_001034604.1, NP\_031513.1  
1433953\_at NP\_766163.2, NP\_849173.2  
1431114\_at, 1436 NP\_766391.2  
1417768\_at NP\_080440.2  
1425749\_at, 1435 NP\_653135.2  
1422673\_at NP\_032884.2  
1423535\_at, 1423 NP\_001165569.1, NP\_443205.1  
NP\_068356.1  
1424141\_at NP\_659037.2  
XP\_980033.1  
1435241\_at NP\_796145.2  
1432444\_a\_at NP\_079732.1  
1425148\_a\_at, 14 NP\_081274.2  
1433599\_at NP\_038843.2  
1416506\_at, 1435 NP\_036098.1  
1420088\_at, 1420 NP\_035037.2  
1422269\_at NP\_064683.2  
1421448\_at, 1428 NP\_064378.4, NP\_001003719.1, NP\_001106185.1  
  
1422346\_at NP\_033411.3, NP\_001139670.1  
1422284\_at NP\_032727.2  
1421246\_at, 1421 NP\_035171.1  
1433903\_at NP\_001032835.2  
1432284\_at, 1435 NP\_001157842.1  
1423347\_at NP\_033173.2  
NP\_079932.2  
1428177\_at, 1428 NP\_084333.1  
1423324\_at, 1423 NP\_032917.2  
1426445\_at NP\_666146.3, NP\_001158725.1, NP\_001158726.1  
1426870\_at, 1426 NP\_001028328.2  
1428171\_at, 1428 NP\_808474.2  
1416858\_a\_at, 14 NP\_038930.1  
NP\_849243.2  
1434767\_at NP\_766166.2



1415833\_x\_at NP\_033119.1  
  
 1427506\_at NP\_001074875.1  
                   NP\_079865.1  
 1426350\_at NP\_666147.1  
                   NP\_081545.3  
  
 1434166\_at  
 1427094\_at, 1431 NP\_035263.1  
                   NP\_839984.1  
 1435020\_at, 1435 NP\_081393.2  
 1418822\_a\_at, 14 NP\_031507.1  
                   NP\_001028408.2  
                   NP\_001129031.1  
  
 1424858\_at NP\_663418.1  
 1427083\_a\_at, 14 NP\_958927.2  
 1428260\_at NP\_848743.1  
 1416075\_at NP\_071311.1  
 1419078\_at, 1428 NP\_001074922.1, NP\_032723.2  
 1417741\_at NP\_573461.2  
  
  
 1434249\_s\_at, 14: NP\_444397.2, NP\_001103672.1, NP\_001103673.1  
                   NP\_082403.2  
  
 \_045056.1  
 1436191\_at NP\_001074664.1  
 1428010\_at NP\_038924.1, NP\_001020025.1, NP\_001020024.1  
 1429595\_at NP\_001156850.1, NP\_084094.1  
 1417937\_at NP\_001177395.1, NP\_067507.2  
                   XP\_003945539.1  
  
 1431035\_at NP\_080378.2, NP\_766052.2  
                   NP\_861417.1  
  
 1424692\_at NP\_080314.1  
 1424106\_at, 1429 NP\_077167.1, NP\_001191996.1  
 1415678\_at, 1417 NP\_032936.1  
                   NP\_083856.1  
                   NP\_001032806.2  
  
 1433579\_at NP\_848830.1  
 1432355\_at  
 1422079\_at, 1434 NP\_032882.2  
 1416035\_at, 1427 NP\_034561.2  
 141662.1  
 |\_003085822.2 XP\_204772.4, XP\_003085870.2  
 1429335\_at NP\_848479.1  
 1428461\_at, 1428 NP\_036154.1  
 1420821\_at, 1420 NP\_109675.1  
 1427982\_s\_at NP\_001005510.2  
 1430344\_at NP\_001165575.1, NP\_082632.2  
 1424750\_at NP\_848859.1

1430832\_at  
1417101\_at NP\_001002012.1, NP\_032327.2

1434680\_at NP\_722499.4  
NP\_038703.3

1423501\_at NP\_032584.2, NP\_001139648.1  
, NM\_001252615.1 NP\_001239543.1, NP\_001239544.1, NP\_058589.2, NP\_001239545.1

1426462\_at, 1426 NP\_766540.2, NP\_666077.2

1421064\_at, 1434 NP\_062525.1

1\_001170401.1 NP\_848860.1, NP\_001163872.1

1435053\_s\_at NP\_851418.2

1430589\_at NP\_084264.1  
NP\_058080.2

1418760\_at NP\_067532.2

1422528\_a\_at NP\_031590.1

1427385\_s\_at, 14 NP\_598917.1

1436438\_s\_at NP\_796241.3  
NP\_598559.2

1416760\_at NP\_001074890.1

1430536\_a\_at NP\_031977.1

1421249\_at, 1421 NP\_080520.2

1431446\_at

1436035\_at NP\_001170974.1  
NP\_001008423.2

, NM\_178682.4 NP\_001229348.1, NP\_848797.1

1423130\_a\_at NP\_001073162.1, NP\_033185.2, NP\_001073163.1

1424898\_at NP\_001171032.1, NP\_035517.1

1\_001146217.1 NP\_071711.2, NP\_001139689.1

1419047\_at, 1419 NP\_061284.2

1434222\_at NP\_766167.2, NP\_001161455.1

, NM\_001267626.1 NP\_001254554.1, NP\_001254555.1, NP\_478119.1

1435071\_at, 1435 NP\_898977.2

1425522\_at, 1425 NP\_081625.3

1420261\_at, 1421 NP\_032969.1  
XP\_003945545.1  
XP\_003945540.1  
NP\_076122.2

1422997\_s\_at NP\_598949.3

1428803\_at NP\_766168.1

, NM\_001163502.1 NP\_001156973.1, NP\_001156974.1  
NP\_766169.1

1426902\_at NP\_766170.2

1417382\_at, 1417 NP\_031673.2, NP\_001021385.1

NP\_082653.2  
 1428415\_at NP\_079801.2  
 NP\_001028506.1  
 1418061\_at NP\_038617.3  
  
 1424532\_at NP\_848140.3  
 1430243\_at NP\_780407.1  
 1423710\_at, 1430 NP\_084501.1  
 1424094\_at NP\_660120.2  
 1424707\_at NP\_081051.1  
 1423100\_at NP\_034364.1  
 XP\_003945546.1  
 NP\_001205052.1, NP\_112149.2, NP\_001191981.1, NP\_001191982.1  
 1424123\_at NP\_663422.1  
 1435195\_at NP\_796328.2  
 1433468\_at NP\_665835.1  
 1433644\_at NP\_700464.2  
 1427552\_a\_at NP\_001239484.1, NP\_001239485.1, NP\_034493.1  
 1427622\_at, 1428 NP\_001028647.1  
 NP\_138106.7 XP\_912236.3, XP\_138106.7  
 NP\_907185.2 XP\_138107.7, XP\_912278.2  
 1435937\_at NP\_035609.1  
 1434660\_at NP\_001096035.1  
  
 NP\_001013390.1  
 1428554\_a\_at NP\_081234.2  
 1429002\_at, 1429 NP\_079783.2  
 1429228\_at, 1429 NP\_861536.3  
 1421357\_at, 1433 NP\_780544.1, NP\_113568.2  
 1435657\_at NP\_780576.1  
 NP\_958926.1  
 1420547\_at NP\_032105.2  
 NP\_032178.1  
 1431613\_a\_at NP\_084187.2  
 1419054\_a\_at, 14 NP\_036007.2, NP\_001139671.1  
 1426999\_at, 1431 NP\_083610.2, NP\_001008506.2, NP\_001153579.1, NP\_001153580.1  
 1427484\_at NP\_001074660.1  
 1434002\_at NP\_899009.2  
  
 1430339\_at, 1431 NP\_084448.1  
 1426492\_at NP\_082630.2  
 1424125\_at NP\_666149.1, NP\_001157898.1, NP\_001157899.1  
 1416005\_at NP\_032973.1  
  
 1417365\_a\_at, 14 NP\_033920.1  
 1431050\_at NP\_705815.1  
 1427138\_at NP\_080957.2

1435742\_at NP\_997594.1, NP\_001153686.1  
\_038048.1, NR\_038049.1, NR\_038050.1  
1427406\_at, 1427 NP\_082722.1  
106464.1  
1434408\_at NP\_083981.2, NP\_001161386.1  
1434684\_at NP\_808288.2, NP\_001154837.1  
1426733\_at, 1431 NP\_766172.1  
NP\_001136411.1  
NP\_001136410.1  
1433479\_at NP\_079942.1  
1432910\_at NP\_766394.2  
NP\_001074486.2  
1415713\_a\_at NP\_065240.2, NP\_001152974.1  
^\_194068.2, NM\_C NP\_919042.2, NP\_919044.1, NP\_081066.2, NP\_919043.1, NP\_919045.1  
1421412\_at NP\_034481.1  
141687.1  
1427941\_at NP\_683750.2  
NP\_001239437.1  
1424702\_a\_at, 14 NP\_083930.5  
1431334\_a\_at, 14 NP\_848728.2  
1430781\_at NP\_084463.1  
1424216\_a\_at, 14 NP\_035242.1  
1435227\_at NP\_067374.2, NP\_001073352.1  
106474.1  
NP\_082538.2  
1424830\_at NP\_033962.2  
NP\_001153382.1  
1428321\_at NP\_001036800.1, NP\_001036801.1  
\_045752.1, NR\_045753.1  
1434920\_a\_at NP\_001156866.1, NP\_031991.3, NP\_001156867.1, NP\_001156868.1  
1422569\_at, 1422 NP\_033563.2  
1423979\_a\_at, 14 NP\_851845.1  
NP\_808270.2  
NP\_001156647.1  
, NM\_001190704.1 NP\_001177632.1, NP\_001177633.1, NP\_034182.2, NP\_001177634.1  
1425542\_a\_at, 14 NP\_001074926.1, NP\_036153.2, NP\_001074927.1, NP\_001128473.1  
1430730\_at  
1416648\_at NP\_084514.2  
1426645\_at, 1433 NP\_034610.1  
NP\_036103.1  
^\_001199785.1 NP\_082641.1, NP\_001186714.1  
NP\_001074526.1  
1429300\_at NP\_780416.2

1434336\_s\_at NP\_932140.1  
1418587\_at NP\_001041671.1, NP\_035762.2  
1417920\_at NP\_291081.2  
106483.1  
1434652\_at NP\_898837.2  
1436115\_at NP\_001028420.2  
A\_173363.5 NP\_829887.1, NP\_775539.1  
  
1428686\_at  
1418316\_a\_at NP\_067491.2, NP\_073712.2  
NP\_067248.1  
1433962\_at NP\_796348.2, NP\_001093262.1, NP\_001093263.1  
1429248\_at NP\_080787.1, NP\_001156860.1  
1417005\_at, 1428 NP\_001020531.2, NP\_032476.2, NP\_001075428.1  
NP\_083151.1  
1424669\_at, 1424 NP\_081028.3  
1434895\_s\_at NP\_035755.1  
NP\_001091090.1  
1432184\_a\_at, 14 NP\_940803.2  
NP\_031447.1  
1418377\_a\_at, 14 NP\_038957.2, NP\_001155209.1  
1416657\_at, 1425 NP\_033782.1, NP\_001159366.1  
NP\_001093930.1  
1433712\_at NP\_001019773.2  
XM\_003945924.1 XP\_003945547.1, XP\_003945973.1  
1424940\_s\_at NP\_663425.2  
1423682\_a\_at, 14 NP\_082299.1  
1426430\_at, 1426 NP\_034718.2  
1424753\_at NP\_079675.1  
NP\_082469.2  
1435153\_at NP\_964008.2, NP\_001139372.1  
1426963\_at, 1434 NP\_001074639.1  
1417295\_at NP\_473422.2  
1417311\_at NP\_077185.1  
NP\_722471.2  
1421139\_a\_at NP\_062511.2, NP\_001004066.1  
NP\_666152.1  
1421504\_at NP\_033265.3, NP\_001159857.1  
NP\_796056.2  
1420814\_at, 1420 NP\_032138.3  
1418772\_at NP\_598824.3  
1423142\_a\_at, 14 NP\_081276.2  
1434597\_at, 1434 NP\_766173.1  
1426531\_at, 1426 NP\_653099.2, NP\_001186070.1  
NP\_001074597.1  
1415796\_at XP\_003085895.1, XP\_001473666.2  
1421384\_at, 1425 NP\_034878.2

NP\_001074817.3  
1424372\_at NP\_083547.1  
NP\_032970.2  
NP\_032156.2  
1422053\_at NP\_032406.1  
, NM\_027118.1 NP\_001074527.1, NP\_081394.1  
1430274\_a\_at NP\_077232.2  
1421815\_at NP\_598826.3  
NP\_057896.1  
1424523\_at NP\_525027.1  
1415815\_at NP\_033080.2  
1430334\_at NP\_001238762.1, NP\_001238763.1, NP\_631880.2  
NP\_666395.2  
NP\_064418.1  
NP\_835514.1  
NP\_835491.1  
1427762\_x\_at NP\_835509.2  
NP\_081101.3  
1423154\_at NP\_077793.1  
1417316\_at NP\_080066.1  
NP\_062424.1  
1419155\_a\_at, 14 NP\_033264.2  
1427462\_at, 1434 NP\_034223.1  
1435323\_a\_at NP\_705774.1  
NP\_079986.1  
1422735\_at NP\_032265.3  
1431567\_at  
1418220\_at NP\_034355.2  
1419485\_at, 1419 NP\_032618.2  
1432574\_at, 1432 XP\_003945552.1, XP\_003945976.1  
A\_001164117.1, N|NP\_033280.1, NP\_001157589.1, NP\_001157590.1, NP\_001230121.1  
  
1420235\_at, 1424 NP\_080788.1  
1427347\_s\_at, 14 NP\_033476.1  
1432366\_at  
1428851\_at NP\_080107.3  
168506.1  
1425497\_a\_at, 14 NP\_038858.2  
1418070\_at, 1418 NP\_034011.1, NP\_001116858.1  
NP\_958746.1  
1431354\_a\_at NP\_077236.1, NP\_001034278.1  
1428657\_at, 1434 NP\_001034277.1, NP\_081106.1, NP\_001171339.1, NP\_001171340.1  
1417763\_at, 1417 NP\_080241.3  
1434810\_a\_at, 14 NP\_082000.2  
1419110\_at, 1425 NP\_077204.2  
1427610\_at, 1435 NP\_076331.2  
NP\_031582.1

1423746\_at NP\_663342.3  
NP\_079656.1  
14001170430.1, NP\_598821.1, NP\_001163901.1, NP\_001163902.1  
1421995\_at, 1421 NP\_035677.2, NP\_001116420.1  
1423766\_at, 1430 NP\_080826.2  
1416479\_a\_at NP\_079663.1  
1422724\_at, 1422 NP\_032573.2, NP\_001139274.1, NP\_001139275.1  
1416444\_at NP\_062296.1  
1422742\_at NP\_031798.2  
NP\_001028571.1  
1428915\_at, 1428 NP\_849179.1  
1420485\_at, 1420 NP\_076043.2  
1422736\_at NP\_064314.2  
1431619\_a\_at NP\_080048.2  
1424988\_at NP\_722484.2  
1434451\_at NP\_001186234.1, NP\_033150.2, NP\_001186233.1  
1432509\_at  
1433475\_a\_at, 14 NP\_001028364.1  
NP\_786925.2  
NP\_034747.2  
1419121\_at, 1430 NP\_058065.2  
1433649\_at NP\_758466.1  
  
1423259\_at, 1423 NP\_112443.1  
  
1427296\_at, 1433 NP\_001028440.2  
1429264\_at  
1431359\_a\_at NP\_081014.1  
1422745\_at, 1422 NP\_001034268.1, NP\_084067.1, NP\_001034269.1  
NP\_951011.1  
1429095\_at, 1432 NP\_079771.1  
1428950\_s\_at, 14 NP\_001074819.1  
1434991\_at NP\_780610.2  
  
1415794\_a\_at, 14 NP\_035592.1, NP\_666155.1  
NP\_079691.1  
1428496\_at, 1428 NP\_083555.1  
NP\_035947.2  
1420776\_a\_at, 14 NP\_057918.2  
1418932\_at NP\_059069.1  
1423428\_at NP\_038874.3  
NP\_038629.2  
1423970\_at, 1423 NP\_082873.2  
  
1427326\_at, 1436 NP\_795961.3  
1422017\_s\_at NP\_001239574.1, NP\_001239575.1, NP\_598558.1, NP\_001239576.1, NP\_001239577  
1421432\_at NP\_064352.2

1424620\_at NP\_848720.1  
NP\_083146.1  
1423532\_at NP\_001139497.1, NP\_001139498.1, NP\_001139499.1, NP\_598825.2  
NP\_001028536.2  
1434095\_at NP\_694771.1  
1418596\_at, 1427 NP\_032037.2  
1420881\_at, 1435 NP\_032765.3  
1421872\_at, 1421 NP\_033026.1  
1431419\_at, 1431 NP\_079872.4  
1422970\_at NP\_057871.2  
N\_001038018.3, N\_001036068.2, NP\_001033107.1, NP\_001106182.1  
NP\_001025467.1  
1426024\_a\_at NP\_001170842.1, NP\_001170843.1, NP\_062787.2  
1417959\_at, 1428 NP\_080407.3, NP\_001107559.1, NP\_001107560.1  
1418096\_at NP\_038767.1  
NP\_080487.2  
1426303\_at, 1426 NP\_666157.1  
1417842\_at NP\_031622.2  
1424569\_at, 1424 NP\_666087.3  
1424005\_at, 1431 NP\_851795.1  
1428256\_at NP\_780359.2  
NP\_082557.1  
1419514\_at NP\_035227.1  
1424572\_a\_at NP\_036145.1, NP\_001152985.1, NP\_001152986.1, NP\_001152987.1  
1428407\_at NP\_084148.1  
1419385\_a\_at, 14 NP\_081118.4, NP\_689420.1  
1417594\_at NP\_062806.1  
1428331\_at NP\_081611.1  
1423684\_at NP\_079555.1  
  
1428625\_a\_at, 14 NP\_083180.3, NP\_001161720.1  
  
1429720\_at, 1433 NP\_084429.2  
1415698\_at NP\_081583.3, NP\_001030294.1  
1433910\_at NP\_705766.3  
1416855\_at NP\_032112.1  
1428853\_at NP\_032983.1  
1433623\_at NP\_780703.1  
1418927\_a\_at, 14 NP\_064370.2  
1429418\_at NP\_766175.3, NP\_001116461.1  
1430657\_at  
1421018\_at, 1434 NP\_079646.1  
NP\_034114.1  
1416369\_at NP\_598441.3, NP\_001077370.1  
NP\_079823.2  
1416372\_at NP\_032985.2  
NP\_705762.2



A\_001169131.1 NP\_941002.2, NP\_001162602.1  
NP\_001138634.1  
NP\_613062.1  
1424071\_s\_at NP\_659086.2  
  
1433603\_at NP\_035018.1  
1422819\_at NP\_444393.1  
1420293\_at, 1420 NP\_663351.3  
1423730\_at NP\_666159.2  
1418257\_at NP\_035520.1  
1429294\_at, 1429 NP\_081458.1  
NP\_001019679.2  
NP\_878259.1  
1426688\_at, 1426 NP\_075770.1  
1436133\_at NP\_077163.1, NP\_001162129.1, NP\_001162130.1  
NP\_001028214.1  
1416942\_at NP\_109636.1  
NP\_620403.2  
1429661\_at, 1433 NP\_082769.1  
1423577\_at, 1430 NP\_598832.3  
, NM\_001145676.1 NP\_001074822.1, NP\_001139148.1  
A\_001163419.1, NP\_612185.1, NP\_001156891.1, NP\_001156892.1  
NP\_001036056.1  
NP\_001074645.1  
1431207\_at NP\_082648.1  
1418584\_at, 1418 NP\_075732.1  
1426476\_at, 1426 NP\_663427.2  
1424601\_at, 1424 NP\_082288.1, XP\_003945985.1  
1423207\_at, 1423 NP\_079611.2  
1429951\_at NP\_077148.1, NP\_077234.2  
1424557\_at NP\_663428.2  
1421621\_at NP\_033053.2  
1435307\_at NP\_780664.2  
NP\_775568.1  
1433571\_at NP\_766176.1  
1431071\_at, 1434 NP\_001156417.1  
1436387\_at NP\_687036.1, NP\_671705.2, NP\_036112.1  
1420639\_at, 1420 NP\_067285.2  
1429189\_at, 1429 NP\_033842.3  
1426775\_s\_at NP\_083429.1  
1435723\_at  
1423235\_at NP\_033810.2  
1417652\_a\_at, 14 NP\_033347.1  
1433620\_at, 1433 NP\_766178.2  
NP\_082382.1

1425354\_a\_at NP\_079906.2  
NP\_034299.2  
1433885\_at NP\_081987.1  
1427229\_at NP\_032281.2  
NP\_001159537.1  
1420964\_at, 1420 NP\_031956.3  
1434125\_at NP\_849249.1  
1430668\_a\_at NP\_075961.1  
1423839\_a\_at, 14 NP\_663430.2, NP\_001164011.1  
105579.2  
1419864\_x\_at, 14 NP\_001041732.1, NP\_848831.2  
1423769\_at NP\_081149.1  
1433646\_at NP\_776118.2  
1421850\_at, 1421 NP\_032660.2  
1434284\_at NP\_001074530.1  
1434291\_a\_at NP\_035483.1  
1426596\_a\_at NP\_035550.1, NP\_001239558.1  
NP\_032782.1  
1423242\_at NP\_001177193.1, NP\_079645.1  
1422016\_a\_at NP\_068686.1  
1416076\_at, 1419 NP\_758505.2  
1422497\_at NP\_075023.2  
1425514\_at, 1425 NP\_001020126.1, NP\_001070963.1  
1433394\_at NP\_780380.2  
1424981\_at NP\_083723.1  
NP\_659087.1  
1428096\_at NP\_083941.2  
1426290\_at, 1426 NP\_079723.1  
1432072\_at NP\_032468.2, NP\_001139251.1  
  
1434967\_at NP\_663431.2  
XM\_003945944.1 XP\_003945572.1, XP\_003945993.1  
NP\_001041715.1  
NP\_001120818.1  
1427194\_a\_at, 14 NP\_082318.2  
1434789\_at NP\_848798.1  
1435280\_at NP\_035186.1  
  
1427005\_at NP\_690017.2  
1423773\_at, 1430 NP\_082763.3, NP\_001116435.1  
NP\_766181.2  
1424850\_at NP\_036075.2  
  
1421239\_at NP\_034690.3  
1422619\_at, 1422 NP\_032929.1, NP\_032273.1  
1426718\_at NP\_082427.1

1434710\_at NP\_766182.2  
1416359\_at, 1416 NP\_570614.2  
1421365\_at, 1434 NP\_032072.1  
NP\_001028400.2  
1434071\_a\_at NP\_598819.2  
NP\_001074478.1  
1427158\_at NP\_067531.1  
1425521\_at NP\_001073318.1, NP\_663432.1  
XM\_003945942.1 XP\_003945568.1, XP\_003945991.1  
  
1433443\_a\_at, 14 NP\_666054.2  
1428616\_at NP\_082521.1  
1429691\_at, 1434 NP\_033007.2  
1426287\_at, 1436 NP\_631973.3  
1423696\_a\_at, 14 NP\_079826.2  
NP\_001028442.2  
1419973\_at, 1429 NP\_081971.1  
1417827\_at NP\_067479.2  
1416731\_at, 1416 NP\_033435.2  
1422202\_at NP\_033406.1, NP\_001106888.1  
1416958\_at, 1416 NP\_035714.3  
1435413\_x\_at NP\_080804.1  
1424593\_at NP\_081751.1  
1424813\_at, 1434 NP\_001171104.1, NP\_759011.2, NP\_001019683.1  
1426473\_at NP\_598842.1  
NP\_079716.1  
1430926\_at NP\_083974.1, NP\_001157110.1, NP\_001157111.1  
1427468\_at, 1428 NP\_032940.1  
  
1428731\_at NP\_084456.2  
105609.2  
NP\_067483.1  
1428295\_at NP\_780341.1  
1430250\_at NP\_766184.2, NP\_001161745.1  
1431066\_at, 1434 NP\_082704.1  
  
1416938\_at NP\_079642.1  
1428383\_a\_at NP\_001239010.1, NP\_001239011.1, NP\_082272.1  
1417931\_at NP\_034941.2  
1423941\_at, 1423 NP\_001034228.1, NP\_001034227.1, NP\_848712.2  
1416156\_at, 1416 NP\_033528.3  
1416319\_at, 1421 NP\_001229970.1, NP\_598840.1  
1423508\_at NP\_059507.2, NP\_001192170.1  
A\_001007268.1 NP\_038877.2, NP\_001007269.1  
1434402\_at NP\_080559.1  
1415990\_at NP\_035825.1

1428635\_at NP\_081241.1  
105606.1  
1423835\_at, 1423 NP\_663434.2  
1424848\_at, 1425 NP\_001240287.1, NP\_001240288.1, NP\_001240289.1, NP\_001240290.1, NP\_001240  
1424198\_at, 1431 NP\_001156985.1, NP\_082002.1  
106837.2  
1435740\_at NP\_899031.2  
168727.1  
1416940\_at NP\_598845.1  
1431348\_at  
1428431\_at, 1428 NP\_001094903.1  
NP\_038497.2  
1421215\_a\_at, 14 NP\_114397.3  
1\_001134465.1 NP\_666081.1, NP\_001127937.1  
NP\_848783.3  
1429893\_at NP\_602319.1  
1\_001114879.1 NP\_083221.1, NP\_001108351.1  
, NM\_009524.3 NP\_001243153.1, NP\_033550.2  
1423225\_at NP\_064363.2  
1423385\_at NP\_081769.2  
1422847\_a\_at NP\_035233.1  
NP\_808483.2  
1422893\_at, 1422 NP\_062333.1, NP\_001160003.1, NP\_001160004.1  
1425404\_a\_at NP\_083115.3  
1416220\_at, 1427 NP\_081187.2  
1428269\_a\_at, 14 NP\_083902.2, NP\_001159402.1  
1433656\_a\_at NP\_705775.2  
  
1426877\_a\_at, 14 NP\_001074720.1  
  
1424882\_a\_at NP\_081565.1  
NP\_619613.2  
1420260\_at, 1428 NP\_082225.1  
1426354\_at NP\_081364.1  
1425307\_at, 1434 NP\_001028840.1  
1423096\_at, 1423 NP\_033926.1  
1421922\_at, 1421 NP\_036024.2  
1419290\_at, 1432 NP\_080183.1  
1431065\_at, 1433 NP\_083208.1  
1434630\_at NP\_001019775.1  
1421687\_at NP\_065622.1  
1420808\_at NP\_001029160.1, NP\_062718.2  
1416485\_at NP\_058593.2  
NP\_036090.2  
NP\_848906.1  
1435108\_at NP\_722495.3

1420931\_at, 1420 NP\_057909.1  
     NP\_083665.2  
 1416209\_at    NP\_032159.1  
     NP\_899101.1  
 1417788\_at    NP\_035560.1  
 1425491\_at, 1425 NP\_033888.2  
 1431657\_at    NP\_084338.1  
 1416752\_at, 1433 NP\_001034160.1, NP\_036048.3, NP\_001034163.1, NP\_001034164.1, NP\_001034162  
 1434778\_at, 1434 NP\_001004436.2  
 1421017\_at    NP\_001177116.1, NP\_001177117.1, NP\_032760.1  
 1427050\_at    NP\_766185.1  
 1430229\_at    NP\_081794.2  
 1419029\_at, 1419 NP\_056589.1  
 1417769\_at, 1417 NP\_080235.2  
 1427289\_at    NP\_001034195.2, NP\_001036184.1, NP\_789815.3  
  
 105653.1  
 1423727\_at    NP\_034049.2  
 1417069\_a\_at, 14 NP\_071306.2  
  
 1430849\_a\_at, 14 NP\_081108.2  
 1424594\_at, 1429 NP\_001032298.1, NP\_083242.1, NP\_001156905.1  
 1420499\_at, 1429 NP\_032128.1  
 1426780\_at    NP\_766187.1  
  
 1419006\_s\_at  NP\_291080.2  
 1427335\_at    NP\_766188.3  
     NP\_997097.1  
 1424738\_at, 1424 NP\_653118.3  
 1428453\_at, 1431 NP\_001074899.1  
 1418529\_at    NP\_598437.2  
 1416135\_at    NP\_033817.1  
     NP\_001028443.1  
 N\_001145921.1, NP\_937892.2, NP\_001139393.1, NP\_001139394.1  
  
 1419741\_at    NP\_291096.2  
     NP\_963999.2  
 1416574\_at, 1436 NP\_075923.2  
 1423099\_a\_at  NP\_062695.2  
 1416638\_at    NP\_001231845.1, NP\_056587.2  
 1415761\_at, 1415 NP\_081127.1  
 1416572\_at    NP\_032634.3  
 1416836\_at    NP\_075369.2  
     NP\_663437.2  
 1421344\_a\_at  NP\_034720.2  
 1429420\_at    NP\_083166.1  
 1416568\_a\_at, 14 NP\_062513.3, NP\_075679.2, NP\_001078941.2, NP\_001078942.2, NP\_001229535.1, N

1416917\_at NP\_067412.1  
XP\_003945596.1  
NP\_001161380.1  
1423572\_at, 1430 NP\_031563.1  
1415728\_at, 1422 NP\_062275.1  
NP\_067526.2  
1416716\_at NP\_034242.2  
1420740\_at NP\_542767.1  
1429798\_s\_at, 14 NP\_080342.1, NP\_083666.1  
NP\_001034287.1  
  
1428003\_s\_at, 14 NP\_694723.1  
1419113\_at NP\_031481.2  
NP\_796023.2  
1419382\_a\_at NP\_001033027.2, NP\_109611.1  
1436010\_at NP\_001019816.1  
1417056\_at NP\_035319.1  
1418474\_at NP\_149158.1  
1417189\_at NP\_035320.1, NP\_001025026.1  
NP\_919327.2  
1419147\_at NP\_064386.2  
1436420\_a\_at NP\_077229.4  
1418198\_a\_at NP\_083056.2  
1432101\_a\_at NP\_001240817.1, NP\_001240818.1, NP\_081949.1  
1423715\_a\_at NP\_032709.1  
1416356\_at, 1429 NP\_818773.1  
NP\_663751.2  
NP\_001161714.1, NP\_064368.3, NP\_001155186.1, NP\_001155187.1  
1426046\_a\_at NP\_062392.1  
1415677\_at NP\_081095.2  
NP\_080679.3  
1418976\_s\_at NP\_034024.2  
NP\_001035161.1  
NP\_001014996.2  
NP\_001139450.2  
1423192\_at, 1423 NP\_079958.3  
1428941\_at NP\_083774.2  
1423271\_at NP\_032151.1  
NP\_033402.2  
1419678\_at, 1419 NP\_056586.2, NP\_700431.1  
NP\_941007.1  
1418137\_at NP\_080677.1  
1431218\_at, 1434 NP\_083768.4  
1430213\_at NP\_082040.2  
1425661\_at, 1425 NP\_001162007.1, NP\_082262.1, NP\_001162008.1, NP\_001162009.1, NP\_001162010  
1423851\_a\_at, 14 NP\_663438.1  
1424389\_at, 1424 NP\_733479.1

NP\_001028444.1  
 1423010\_at, 1434 NP\_766397.2  
 1421828\_at NP\_032492.1  
 1417888\_at NP\_075722.1, NP\_001157692.1  
 1427410\_at, 1427411\_s\_at  
 1\_001039105.2 NP\_996857.1, NP\_001034194.1  
 NP\_775595.1  
 NP\_080277.1  
 NP\_001230786.1  
 1423274\_at, 1423 NP\_032741.2  
  
 1434517\_at NP\_780755.2  
 1418863\_at, 1418 NP\_032118.2  
 1434676\_at NP\_808262.1  
 1425928\_at NP\_775569.2  
 1421089\_a\_at NP\_082504.1  
 1421339\_at, 1434 NP\_061258.2  
 NP\_950194.2  
 1428304\_at NP\_082315.3  
 NP\_666056.1  
  
 1425621\_at, 1429 NP\_084255.2  
 NP\_033891.1  
 1429715\_at NP\_082308.1, NP\_001192117.1  
 1418494\_at NP\_034225.1  
 1425747\_at, 1430 NP\_808448.2  
  
 NP\_035050.2  
 NP\_001139484.1  
 1430936\_at NP\_598839.2  
 1421486\_at, 1436 NP\_061251.1  
 1426012\_a\_at NP\_666167.3  
 1433801\_at NP\_001004155.2, NP\_001106206.1  
 1423946\_at NP\_001240665.1, NP\_666090.1  
 1420743\_a\_at, 14 NP\_032941.1  
 1424565\_at, 1424 NP\_080221.3, NP\_001157554.1  
  
 1433667\_at, 1436 NP\_660254.1  
 1428478\_at NP\_850919.1  
 1422110\_at, 1435 NP\_068677.2  
 NP\_919326.1  
 , NM\_001252663.1 NP\_001239591.1, NP\_001239592.1, NP\_038542.1, NP\_001239593.1, NP\_001239594  
 1415682\_at, 1432 NP\_075532.1  
 1416333\_at NP\_034201.1  
 1426903\_at NP\_997519.2  
 1416389\_a\_at, 14 NP\_598844.3, NP\_001164165.1  
 1417850\_at NP\_033055.2

1417999\_at, 1418 NP\_032436.1  
141754.1  
NP\_058599.1  
, NM\_001252132.1 NP\_001028611.2, NP\_001239061.1  
1418771\_a\_at, 14 NP\_062749.2  
1430568\_at, 1434 NP\_080359.2  
1434654\_at NP\_796355.2  
1420835\_at, 1420 NP\_080508.1  
  
1416642\_a\_at, 14 NP\_033455.1  
  
1426626\_at NP\_081092.1  
NP\_080453.2  
NP\_038773.1  
1425742\_a\_at, 14 NP\_001171222.1, NP\_033392.1, NP\_997535.2  
1431979\_at  
, NR\_027699.1 NP\_001153798.1  
NP\_766076.1  
NP\_780578.1  
, NM\_172813.3 NP\_001240688.1, NP\_766401.1  
, NR\_045588.1 NP\_001074805.1  
1418003\_at NP\_079703.2  
1429056\_at, 1429 NP\_080108.1  
NP\_666072.3  
NP\_001030054.2  
1419374\_at, 1419 NP\_061235.2  
1417540\_at NP\_031946.1  
1417051\_at NP\_067518.2, NP\_001036191.1  
1434869\_at NP\_766193.3, NP\_001240684.1  
1434663\_at, 1434 NP\_780454.1  
1429478\_at, 1433 NP\_780474.1  
1426609\_at NP\_082591.2  
1430698\_a\_at, 14 NP\_083596.2, NP\_083730.2  
1430255\_at NP\_033899.2  
1435292\_at NP\_001074747.2  
NP\_057932.2  
1434881\_s\_at NP\_808383.3  
  
1432339\_at  
1426886\_at NP\_001028414.1  
1427471\_at NP\_056637.1  
1434274\_at, 1434 NP\_997098.2  
1426419\_at NP\_598838.3  
1421656\_at, 1436 NP\_036027.1  
NP\_941003.1  
1419688\_at, 1419 NP\_035951.1, NP\_001073313.1



1424526\_a\_at NP\_083854.3  
1417245\_at NP\_067409.2  
, NM\_001163675.1 NP\_001028508.2, NP\_001157147.1, NP\_001157148.1  
1419162\_s\_at, 14 NP\_032955.2  
1429836\_at, 1431 NP\_001074721.2  
1421599\_at NP\_056635.2  
1421574\_at, 1426 NP\_083795.2  
NP\_598843.3  
1426247\_at, 1426 NP\_663440.1  
1423928\_at, 1423 NP\_081137.2

1423295\_at NP\_542123.3  
1425666\_at NP\_075363.1  
1430350\_at  
1421301\_at NP\_033600.3  
1428113\_at, 1432 NP\_082927.1  
NP\_796367.3  
1435747\_at NP\_034331.2, NP\_997550.1  
1421543\_at, 1427 NP\_598860.2  
1426459\_s\_at NP\_666042.2

1436395\_at NP\_001156610.1  
NP\_080345.1

NP\_001013385.3  
1434647\_at NP\_848863.1  
1419080\_at NP\_034405.1  
1430309\_at NP\_081983.2, NP\_957684.1  
1418969\_at, 1425 NP\_038815.1, NP\_663443.1  
NP\_796152.2  
1417400\_at, 1417 NP\_109615.1, NP\_001159880.1  
\_045064.1, NR\_045065.1  
NP\_444307.1  
NP\_848832.1

1435184\_at NP\_032754.2, NP\_001034270.1  
106892.3  
1422692\_at, 1422 NP\_035424.1  
1419650\_at NP\_035897.2  
1420116\_s\_at, 14 NP\_079949.1  
NP\_031692.2  
1428572\_at NP\_081671.1

1422544\_at NP\_062345.2  
1425030\_at NP\_653106.1  
NP\_795933.2  
1433745\_at NP\_001074771.1  
1431308\_at NP\_001157913.1, NP\_080429.1, NP\_081772.1

1433834\_at NP\_766194.2  
1417258\_at NP\_031663.1  
1428683\_at NP\_080822.1  
1429027\_at

1422167\_at, 1434 NP\_033180.2  
NP\_001078890.1  
1421110\_at, 1434 NP\_080278.3  
1419442\_at NP\_058042.2  
1418273\_a\_at NP\_033109.1, NP\_001156957.1  
NP\_775597.1  
1428326\_s\_at NP\_032313.2  
1428458\_at NP\_690854.1, NP\_080616.1  
1424612\_at NP\_663444.2

1421342\_at NP\_851834.1  
1418512\_at, 1418 NP\_062609.2  
1426155\_a\_at, 14 NP\_473390.1

1430801\_at, 1434 NP\_796125.2  
1415970\_at, 1434 NP\_444301.1  
1419588\_at NP\_036161.2  
1417508\_at, 1417 NP\_038951.1  
1418883\_a\_at NP\_032800.2  
1416102\_at, 1416 NP\_035870.1, NP\_001240734.1, NP\_001240735.1, NP\_001240736.1  
1417568\_at, 1417 NP\_598855.2, NP\_001164337.1, NP\_001164338.1, NP\_001164339.1  
, NM\_001112721.1, NP\_001074828.2, NP\_001106192.1  
1422702\_at, 1430 NP\_061215.1, NP\_001095928.1  
1419544\_at, 1419 NP\_079770.2  
1429462\_at, 1435 NP\_765990.2  
1435442\_at NP\_941008.2  
1422809\_at, 1432 NP\_001243311.1, NP\_001243312.1, NP\_444501.1, NP\_001243313.1  
1433864\_at NP\_766402.1  
1419012\_at NP\_035896.1  
1418501\_a\_at, 14 NP\_570955.1, NP\_001123635.1, NP\_001123636.1, NP\_001123637.1, NP\_001123638  
1429655\_at, 1433 NP\_080425.3, NP\_001107026.1  
1429410\_at, 1429 NP\_778174.1  
1422669\_at NP\_062353.3  
1416161\_at, 1416 NP\_033035.3  
1417730\_at NP\_034292.2  
1436583\_at NP\_898912.2

1419963\_at NP\_663445.2, NP\_001033026.1  
1424204\_at, 1435 NP\_081035.1  
^\_001168250.1 NP\_598853.3, NP\_001161722.1  
1421455\_at NP\_057876.1  
NP\_955520.1

NP\_083694.1  
 1\_001042438.1 NP\_033598.2, NP\_001035903.1  
 1436174\_at NP\_081711.2  
 1432489\_a\_at, 14 NP\_084010.1  
 1417522\_at, 1435 NP\_080622.1  
 NP\_780421.2  
 l\_621400.5 XP\_910945.4, XP\_621400.5  
 1429425\_at, 1429 NP\_780435.1  
 NP\_780360.1  
 NP\_075661.1  
 1424826\_s\_at, 14: NP\_659049.2, NP\_001139652.1  
 1415993\_at NP\_033296.1  
 1434132\_at NP\_705776.2  
 1424149\_at NP\_081022.2, NP\_001158076.1  
 1424880\_at, 1424 NP\_653132.1  
 1434301\_at NP\_001156398.1  
  
 1424942\_a\_at NP\_034979.3, NP\_001170823.1, NP\_001170824.1, NP\_001170825.1  
 1425572\_a\_at, 14 NP\_034156.2  
 1416131\_s\_at, 14 NP\_598527.2  
 1418960\_at NP\_001074878.1  
 1420760\_s\_at, 14: NP\_032707.2  
 1432413\_at NP\_850993.2, NP\_083916.1, NP\_001158113.1, NP\_001158114.1, NP\_001158115.1  
  
 1426366\_at, 1435 NP\_694818.3  
 1431526\_at  
 1418409\_at, 1418 NP\_032441.4  
 1430155\_at  
 NP\_082492.1  
 , NM\_011759.2 NP\_001038183.1, NP\_035889.1  
 NP\_919331.1  
 1435949\_at NP\_742119.1  
 1426625\_at NP\_084475.1  
 1427064\_a\_at NP\_598850.1  
 1416438\_at, 1430 NP\_082640.2, NP\_598452.2, NP\_001158072.1  
 1424544\_at NP\_659096.1  
 1427537\_at NP\_659097.2  
 1419835\_s\_at, 14: NP\_001157012.1, NP\_001157014.1, NP\_001157021.1, NP\_035247.2, NP\_958787.2, N  
  
 , NM\_001163576.1 NP\_001157047.1, NP\_001157048.1  
 1417423\_at, 1436 NP\_075657.1  
 1424685\_at NP\_780608.1  
 NP\_034461.1  
 1416604\_at NP\_079843.1  
 1424165\_a\_at NP\_079616.2  
 1420046\_s\_at, 14: NP\_001158079.1, NP\_081135.3, NP\_001158080.1  
 1419046\_at NP\_067530.2

1432045\_at NP\_898922.2  
 1433808\_at NP\_001155961.1, NP\_780666.3  
 1423264\_at, 1430 NP\_038509.1  
 1428983\_at NP\_942588.1  
 1424622\_at NP\_032322.1  
 1418295\_s\_at NP\_034176.1  
 1421368\_at, 1436 NP\_570963.1  
 l\_984290.4 XP\_988010.2, XP\_989384.2  
 NP\_038937.2  
 NP\_083919.1  
 1419284\_at, 1419 NP\_851293.1, NP\_062269.1  
 1421312\_a\_at, 14 NP\_034760.2  
 1422212\_at, 1422 NP\_032015.1  
 NP\_203535.1  
 NP\_081398.2  
 1422922\_at NP\_478121.2  
 1424419\_at NP\_663446.1  
 1433876\_at NP\_932787.1  
 A\_145472.2 NP\_789798.2, NP\_663447.1  
 1434445\_at NP\_940812.2, NP\_001161760.1  
 NP\_666021.2  
 1419989\_at NP\_079812.1  
 1417762\_a\_at NP\_036183.1  
 A\_001168276.1 NP\_766405.2, NP\_001161748.1  
 1418245\_a\_at, 14 NP\_444334.3, NP\_780596.1, NP\_001104297.1, NP\_001104298.1, NP\_001104299.1, NP\_001075439.1  
 1417472\_at, 1420 NP\_071855.2  
 1434414\_at NP\_001017983.2, NP\_001161732.1  
 1416100\_at NP\_061219.2  
 1420596\_at NP\_031609.1  
 A\_001163613.1, NP\_082798.1, NP\_001157085.1, NP\_001157084.1  
 NP\_033463.1  
 1418356\_at NP\_619611.3, NP\_001155964.1, NP\_001155965.1  
 1435525\_at NP\_001074836.2  
 1428676\_at NP\_082178.2  
 NP\_898964.2  
 1424376\_at NP\_081495.1  
 1417078\_at, 1417 NP\_079898.2  
 1423834\_s\_at NP\_666041.1  
 NP\_033190.2  
 1417890\_at NP\_064667.2  
 1419573\_a\_at NP\_032521.1  
 1423453\_at NP\_598561.2  
 1427447\_a\_at NP\_613045.3, NP\_001019887.1, NP\_001034244.1, NP\_001034245.1  
 105742.2  
 1423702\_at NP\_032223.2

1\_001161712.1 NP\_038875.3, NP\_001155184.1  
 1423728\_at NP\_660121.2  
 NP\_803412.1  
 1424985\_a\_at, 14 NP\_035567.1  
  
 1418936\_at NP\_034885.1  
 1427059\_at NP\_766196.1, NP\_001240746.1, NP\_001240748.1, NP\_001240749.1  
 NP\_032453.3  
 1418538\_at NP\_598851.2  
 1431849\_at NP\_083683.1  
 NP\_082910.1  
 NP\_083068.1  
 XP\_003945602.1  
 NP\_038846.2  
 1433832\_at NP\_919323.2, NP\_001192274.1, NP\_001192275.1  
  
 , NM\_001013362.2, NP\_001013378.2, NP\_001013380.2  
 NP\_109614.2  
 1421181\_at, 1424 NP\_083039.2  
  
 NP\_035187.2  
 1424930\_s\_at NP\_666098.2  
 1426545\_at NP\_659061.2, NP\_796098.3  
 1418372\_at NP\_033764.2  
 1432091\_a\_at NP\_598852.2  
 1434900\_at NP\_694629.2, NP\_001076005.1  
  
 1416851\_at, 1436 NP\_598487.1  
 NP\_796284.1  
 NP\_067292.2  
 1434765\_at NP\_808489.4  
 1433777\_at NP\_666105.2  
 NP\_001157792.1  
 1423749\_s\_at NP\_001139646.1, NP\_035371.4  
 NP\_001074485.1  
  
 105750.1  
 1424175\_at NP\_705617.2, NP\_059072.1  
 1417309\_at, 1417 NP\_065253.1  
 1424170\_at NP\_081013.1  
 1424227\_at, 1424 NP\_084505.2  
 1423845\_at NP\_663448.2  
 1424167\_a\_at, 14 NP\_038900.1  
 1417437\_at, 1428 NP\_034377.2  
 NP\_035612.2  
 1429929\_at NP\_083173.2  
 1427657\_at, 1428 NP\_766016.2  
 1426744\_at NP\_150087.1

1418184\_at NP\_079915.1, NP\_001073627.1, NP\_840000.2  
\_037698.1  
1421909\_at, 1421 NP\_038864.3, NP\_001107612.1

1421938\_at, 1434 NP\_075964.1  
NP\_083377.3  
1434176\_x\_at NP\_848742.1  
1426534\_a\_at, 14 NP\_079721.2  
1429795\_at  
^\_001159509.1, NI NP\_035992.1, NP\_001152981.1, NP\_001152982.1  
NP\_001025185.1  
1416695\_at NP\_033905.3  
NP\_898838.2  
NP\_073560.2  
1423673\_at NP\_808298.2  
, NR\_030731.1 NP\_001074635.2  
1422719\_s\_at, 14 NP\_057923.2  
1435745\_at NP\_001028445.1  
1422540\_at NP\_034310.2  
1422576\_at, 1431 NP\_058539.2  
1420891\_at, 1420 NP\_033554.3, NP\_001157105.1, NP\_001157106.1

^\_001113418.1 NP\_035274.2, NP\_001106889.1  
1416969\_at NP\_038910.1, NP\_001162143.1  
1430828\_at NP\_082339.1  
1418925\_at NP\_034016.2  
, NM\_172611.4 NP\_001192282.1, NP\_766199.1  
1434034\_at NP\_663450.3  
1423776\_s\_at NP\_663451.2  
1419489\_at, 1419 NP\_598857.1, NP\_001239239.1  
1434821\_at NP\_001028446.2  
NP\_852077.1  
1424818\_at, 1427 NP\_663452.1, NP\_001135829.1  
NP\_083996.1  
NP\_663453.1  
NP\_001002005.2

1425161\_a\_at, 14 NP\_080761.2  
1428894\_at NP\_082181.2  
1435090\_at NP\_001156791.1  
1421925\_at, 1421 NP\_035291.4  
1416683\_at NP\_620088.2, NP\_001152993.1  
1436140\_at NP\_081357.2  
1425055\_at, 1425 NP\_082081.1, NP\_081089.1  
1419137\_at NP\_067398.2  
1431931\_a\_at NP\_081093.2

^\_001109040.1, NI NP\_057914.2, NP\_001102510.1, NP\_001102511.1, NP\_001102512.1  
1435387\_at NP\_001028805.2  
1428489\_at NP\_080301.1  
1434822\_at, 1435 NP\_666174.2, NP\_780572.1, NP\_001076583.1  
NP\_001028389.1  
^\_001164785.1, NI NP\_803180.3, NP\_001158257.1, NP\_001158258.1  
1420873\_at, 1420 NP\_032997.3  
1423560\_at, 1423 NP\_058023.2  
  
, NM\_175344.4 NP\_001240742.1, NP\_780553.2  
  
1426525\_at, 1432 NP\_780460.3  
1434691\_at NP\_082424.2  
1415903\_at NP\_598847.2, NP\_001159928.1, NP\_001159930.1  
1426722\_at, 1429 NP\_780330.2  
NP\_082279.1  
^\_001168693.1 NP\_032928.1, NP\_001162164.1  
1434783\_at, 1434 NP\_001239082.1, NP\_958747.1  
1424224\_at, 1424 NP\_084397.3, NP\_001164181.1, NP\_001164182.1  
1435512\_at, 1436 NP\_808384.2  
1416171\_at NP\_598475.2  
  
1419313\_at NP\_033963.1  
  
1430211\_at NP\_001188251.1  
1418128\_at NP\_031431.2  
^\_001044741.1 NP\_031607.2, NP\_001038206.1  
1430050\_at NP\_001074450.1  
NP\_766200.1  
1421789\_s\_at, 14 NP\_031504.1  
1426091\_a\_at NP\_035848.1  
1436268\_at NP\_001013763.1  
105701.1  
1417690\_at, 1433 NP\_058061.2  
1427555\_at, 1435 NP\_001028448.3  
NP\_081243.1  
1422127\_at, 1434 NP\_031883.1  
NP\_083374.1  
1423846\_x\_at NP\_035784.1  
1433584\_at NP\_035783.1  
NP\_033474.1  
1420256\_x\_at, 14 NP\_038667.2, NP\_001157060.1, NP\_001157061.1  
1433790\_at NP\_084435.1, NP\_001155978.1  
NP\_001019873.1  
1429773\_at NP\_789805.1  
1421619\_at, 1431 NP\_034731.3  
1416535\_at NP\_058046.2, NP\_001157628.1

1427015\_at NP\_001001884.1  
NP\_083512.2  
1421546\_a\_at NP\_001240737.1, NP\_001240738.1, NP\_036155.1  
NP\_082291.1  
1422499\_at, 1425 NP\_075550.2, NP\_001107017.1  
, NM\_001024526.2, NP\_001074417.1, NP\_001019697.2  
1432268\_at  
1434335\_at NP\_001152833.1, NP\_766407.2  
1417584\_at, 1426 NP\_032758.2, NP\_001139633.1  
  
1418860\_a\_at, 14 NP\_598854.1  
1434532\_at NP\_700456.1  
1418159\_at NP\_258437.1  
  
NP\_036003.2  
1425108\_a\_at NP\_778157.2, NP\_001029044.1  
1423515\_at NP\_001070967.1, NP\_035453.2  
NP\_001201840.1  
NP\_659039.1  
1435825\_at NP\_033742.2  
1435844\_at  
  
NP\_062391.3  
1416505\_at NP\_034574.1  
1424212\_at NP\_080842.1  
  
1426378\_at, 1426 NP\_663600.2  
168739.1  
NP\_705761.2  
NP\_001028449.2  
1417933\_at NP\_032370.2  
NP\_666176.1  
1419415\_a\_at, 14 NP\_001036192.1, NP\_035374.3  
168542.1  
1416747\_at NP\_598861.1  
1433862\_at NP\_001014976.1  
NP\_700465.2  
1418425\_at NP\_569725.1  
1423686\_a\_at NP\_079661.1, NP\_001164382.1  
1421743\_a\_at, 14 NP\_001096635.1, NP\_001096636.1, NP\_035172.2, NP\_001167544.1  
1425874\_at NP\_034594.1  
NP\_034592.2  
  
NP\_032298.1  
NP\_034596.1  
1421932\_at, 1421 NP\_031652.1, NP\_001070257.1, NP\_001103686.1



1423267\_s\_at, 14 NP\_034707.3  
1415721\_a\_at NP\_083366.1  
1416170\_at NP\_080784.1  
1434633\_at, 1435 NP\_001020603.1  
\_040571.1, NR\_040572.1  
1418586\_at, 1419 NP\_033754.2  
1418167\_at NP\_112459.1  
1416598\_at, 1416 NP\_112461.2  
1428147\_at, 1428 NP\_084481.3  
1427894\_at NP\_647468.2  
1430530\_s\_at NP\_080669.1  
1416399\_a\_at NP\_034573.2, NP\_001129538.1  
NP\_079946.2  
141788.1  
1424871\_s\_at NP\_663334.1  
1431285\_at NP\_001239366.1, NP\_083933.1  
1419701\_s\_at NP\_082577.2  
034499.2  
\_001079814.1 NP\_082996.2, NP\_001073282.1  
1433780\_at NP\_080942.1  
\_027804.1 NP\_038824.2  
NP\_001028392.2  
NP\_663337.2  
1436668\_at NP\_081722.1  
1418040\_at, 1418 NP\_079984.2  
1431464\_a\_at, 14 NP\_058577.1  
1415975\_at, 1415 NP\_080097.1  
\_489506.5 XP\_622598.3, XP\_489506.3  
1419920\_s\_at, 14 NP\_001003918.2  
1431018\_at, 1434 NP\_001074869.1  
1427603\_at, 1430 NP\_694763.2, NP\_083529.1  
NP\_034026.1  
1422419\_s\_at NP\_038722.3  
1422913\_at NP\_038666.2  
NP\_032959.1  
NP\_001156404.1  
1416303\_at, 1416 NP\_064364.1  
1422310\_at NP\_033249.1  
\_134105.2 NP\_083858.1, NP\_598866.1  
NP\_079822.1  
1430618\_at  
1426736\_at, 1426 NP\_666178.2, NP\_001123480.1  
  
1428028\_at, 1435 NP\_862908.1, NP\_705816.2, NP\_001116139.1  
  
1425422\_a\_at NP\_083037.1

1426488\_at, 1426 NP\_001171023.1, NP\_080252.1  
1429165\_at NP\_079929.1  
1415725\_at NP\_001034610.1  
1423538\_at NP\_035076.1  
1419327\_at, 1428 NP\_444411.2, NP\_001034622.1  
1423233\_at NP\_031705.3  
NP\_666180.2  
1430134\_a\_at NP\_937889.1  
1428008\_at, 1428 NP\_001021118.1, NP\_690029.2  
1420176\_x\_at, 14 NP\_001177254.1  
1422416\_s\_at NP\_058678.1  
NP\_035754.1  
1419568\_at, 1426 NP\_001033752.1, NP\_036079.1  
1429268\_at NP\_899110.2

1418206\_at NP\_071719.1

1430076\_at NP\_084055.2, NP\_001158078.1  
NP\_033482.1  
NP\_001028510.2  
1427581\_at NP\_849253.2  
1435003\_at NP\_001001983.2  
1423354\_at, 1423 NP\_075837.3  
1421953\_at, 1421 NP\_031790.2  
NP\_080084.2  
1426428\_at, 1426 NP\_081185.1  
1429530\_a\_at, 14 NP\_084221.2, NP\_001158081.1, NP\_001158082.1, NP\_001158083.1  
NP\_001040683.1 NP\_291087.2, NP\_001035773.1  
1426481\_at, 1430 NP\_663454.3  
1434740\_at NP\_722485.1  
1436286\_at  
NP\_085035.1  
1421809\_at, 1421 NP\_034178.2, NP\_001103220.1  
1417989\_at NP\_033461.2  
NP\_033462.2  
1416821\_at, 1416 NP\_071853.2, NP\_001075102.1  
1428190\_at NP\_694790.1  
1436468\_at NP\_742163.4  
1422547\_at NP\_035369.2  
1434244\_x\_at NP\_001074468.1, NP\_001074469.1, NP\_001182134.1  
1422981\_at, 1435 NP\_201581.2

1423061\_at NP\_258435.2  
1419316\_s\_at NP\_001075151.1, NP\_075609.2  
1425779\_a\_at NP\_035662.1  
107007.1, XR\_105762.1

1417839\_at NP\_038833.2  
1416575\_at NP\_033992.2, NP\_001155095.1  
NP\_035052.2  
1436241\_s\_at NP\_034565.2  
1420993\_at, 1420 NP\_473393.2, NP\_001152879.1, NP\_001152880.1  
1428651\_at, 1429 NP\_083712.4  
, NM\_001145931.1 NP\_001139402.1, NP\_001139403.1, NP\_001028409.2  
1433478\_at NP\_001005767.1  
NP\_898981.2  
1418042\_a\_at, 14 NP\_038818.2, NP\_789809.1  
1433886\_at NP\_758469.1  
107009.2  
1420457\_at NP\_031915.2  
NP\_666051.2  
1423358\_at, 1424 NP\_079738.2, NP\_647454.2, NP\_808811.1, NP\_808809.1, NP\_808810.1  
1429204\_at NP\_082696.1  
1415831\_at NP\_598862.1  
1427036\_a\_at, 14 NP\_666053.2, NP\_001005331.1  
1426729\_at NP\_598539.1  
NP\_034030.2  
1424473\_at NP\_663607.1  
^\_001173505.1 NP\_033405.1, NP\_001166976.1  
1417304\_at NP\_034023.1  
1428097\_at NP\_001001881.1  
1424191\_a\_at NP\_079969.1  
, NM\_153404.2 NP\_001077363.1, NP\_700453.1  
NP\_898850.2  
1419543\_a\_at, 14 NP\_033212.1  
1420998\_at, 1428 NP\_076283.2  
^\_001123037.1, NI NP\_038534.2, NP\_001116509.1, NP\_001116510.1

1424321\_at NP\_663455.1  
1421818\_at NP\_033874.1  
1436178\_at NP\_775555.1  
1420522\_at, 1420 NP\_080478.2, NP\_001020786.1  
^\_183064.3 NP\_034329.1, NP\_898887.1  
NP\_808386.2

1430459\_at  
1418102\_at NP\_032261.1  
1434513\_at NP\_001121566.1, NP\_001121568.1  
1426734\_at NP\_808300.1  
1433561\_at NP\_084414.1  
1417341\_a\_at, 14 NP\_080076.1  
1426959\_at NP\_780386.3, NP\_001116155.1  
NP\_766410.2  
1417002\_at, 1417003\_at

1423045\_at, 1423 NP\_080830.1  
1428831\_at NP\_796077.2  
1435912\_at NP\_808301.3  
1428972\_at, 1428 NP\_079605.1  
1421957\_a\_at, 14 NP\_034111.1, NP\_001156631.1, NP\_001156632.1  
1422966\_a\_at, 14 NP\_035768.1  
^\_001110147.1 NP\_058068.2, NP\_001103617.1  
1428243\_at NP\_766203.1, NP\_001186967.1  
1424342\_at, 1431 NP\_081502.2, NP\_001152821.1  
1432467\_at NP\_001074724.1  
  
NP\_848465.1  
^\_001130484.1, NP\_067313.2, NP\_001123956.1, NP\_001123957.1  
NP\_766411.1  
1436027\_at NP\_789810.2  
1416396\_at NP\_542124.1  
1435403\_at  
1418381\_at, 1427 NP\_035879.1  
NP\_780465.4  
1431652\_at, 1434 NP\_033497.1  
1429796\_at, 1436 NP\_001157740.1, NP\_796331.2  
1425504\_at, 1425 NP\_647461.3  
NP\_076076.2  
NP\_001012783.3  
1416320\_at NP\_598465.2  
1424650\_at NP\_082571.1  
1422146\_at, 1435 NP\_038689.2  
NP\_705778.1  
1428566\_at, 1428 NP\_780320.2  
NP\_081618.1  
1424465\_at NP\_941047.1, NP\_001152893.1, NP\_001152894.1  
1416221\_at NP\_032073.2  
1427131\_s\_at NP\_796067.2  
  
1434439\_at NP\_062801.1  
NP\_031440.1  
1427717\_at, 1432 NP\_033985.3  
1426535\_at NP\_759012.1  
1423316\_at NP\_080683.2, NP\_001192216.1, NP\_001192215.1  
1432022\_at NP\_064656.2  
1425934\_a\_at NP\_062778.2  
NP\_001007461.1  
1434725\_at NP\_001165578.1, NP\_705756.1  
1422508\_at NP\_031534.2  
1428409\_at, 1428 NP\_082384.1  
1428681\_at NP\_001025060.1  
1427030\_at, 1427 NP\_653133.3

1426869\_at, 1427 NP\_766094.1  
NP\_666084.1  
1419970\_at, 1419 NP\_083032.2  
1418179\_at NP\_080678.1  
NP\_034948.3  
NP\_001005854.2  
1417319\_at, 1421 NP\_067472.1, NP\_067471.1, NP\_067470.1  
1432868\_at NP\_081617.1, NP\_001103487.1  
NP\_766204.2  
1418929\_at NP\_082956.2  
1419554\_at, 1428 NP\_034711.1  
1422741\_a\_at, 14 NP\_081720.2  
\_040380.1  
NP\_001028410.1  
1417483\_at NP\_085115.1, NP\_001152866.1, NP\_001152867.1  
XM\_001480210.1 XP\_001479230.1, XP\_001480260.1  
NP\_077180.1  
NP\_766614.2  
1428314\_at NP\_001019793.1  
1424333\_at NP\_083368.1  
1417192\_at, 1426 NP\_613065.2  
1418763\_at NP\_075664.1  
105786.1  
1426899\_at NP\_080530.2  
1420526\_at NP\_082799.2  
NP\_061254.1  
1422492\_at, 1422 NP\_031783.2  
1423976\_at NP\_080549.1  
1427969\_s\_at NP\_082335.1  
XM\_003689302.1 XP\_003688988.1, XP\_003689350.1  
NP\_848762.1  
1428252\_at, 1428 NP\_081155.1  
1430596\_s\_at NP\_082848.1  
1420654\_a\_at NP\_083079.1  
1427231\_at NP\_062286.2  
1418469\_at, 1432 NP\_775616.1  
1427321\_s\_at NP\_034118.1, NP\_001020363.1  
NP\_033900.1  
1424724\_a\_at, 14 NP\_001239367.1, NP\_001239368.1, NP\_080243.3, NP\_001239369.1  
1417966\_at NP\_059100.3  
1419288\_at, 1431 NP\_076333.3  
1416143\_at NP\_058035.1  
NP\_032091.2  
1420621\_a\_at, 14 NP\_001185752.1, NP\_031497.2, NP\_001185753.1, NP\_001185754.1, NP\_001185755  
NP\_033751.3

1422561\_at NP\_035912.2  
1430203\_at, 1431 NP\_077220.2  
1415785\_a\_at NP\_033970.3

NP\_031546.1

1435304\_at NP\_035564.1  
1427333\_s\_at NP\_849254.2  
1418260\_at NP\_056570.1  
NP\_083773.1

1424315\_at, 1435 NP\_080778.2  
1436333\_a\_at, 14 NP\_001038980.1, NP\_001157955.1

1418007\_at, 1418 NP\_080386.3  
1416232\_at NP\_058663.2  
1427691\_a\_at NP\_001103968.1, NP\_034639.2  
1419455\_at NP\_032375.2  
1423557\_at, 1423 NP\_032364.1  
1423707\_at NP\_084294.1  
1416283\_at, 1424 NP\_034386.2  
1420951\_a\_at, 14 NP\_849211.3, NP\_064357.2  
1426739\_at NP\_068366.1

1430546\_at, 1430 NP\_598440.1, NP\_081270.1  
1422170\_at, 1435 NP\_059087.2  
1424440\_at NP\_536704.1  
1416600\_a\_at, 14 NP\_062339.2, NP\_001075018.1  
1422864\_at, 1422 NP\_033951.2, NP\_001104491.1, NP\_001104492.1, NP\_001104493.1  
1428330\_at NP\_080976.1, NP\_081569.1  
1420091\_s\_at, 14 NP\_001038994.2  
1423877\_at, 1431 NP\_082359.1  
1419437\_at, 1419 NP\_035507.2  
1436038\_a\_at NP\_062416.1, NP\_001153088.1, NP\_001153089.1, NP\_001153090.1, NP\_001153091  
1416482\_at, 1416 NP\_033467.2  
1426226\_at, 1428 NP\_031916.1, NP\_001106860.1  
1416268\_at NP\_035939.3  
1427322\_at, 1433 NP\_660107.2, NP\_001096649.1, NP\_795902.1  
141441.1

NP\_032277.3

1430312\_at NP\_997184.1  
1436086\_at NP\_001001492.2  
1422644\_at, 1433 NP\_056640.1  
1416673\_at, 1435 NP\_062390.3  
NP\_659038.2  
1430544\_at, 1436 NP\_777272.2

1426826\_at NP\_598884.2

NP\_001078824.1  
 XP\_003945614.1  
 1423668\_at NP\_666185.3  
 1423076\_at, 1423 NP\_079940.2  
 1425217\_a\_at, 14 NP\_035653.2, NP\_001106822.1, NP\_001106823.1, NP\_001106824.1  
 1430092\_at NP\_796285.2, NP\_001104487.1  
 1428906\_at NP\_852057.2  
 NP\_033536.2  
 NP\_061289.1  
 168753.1  
 NP\_598875.2  
 1435642\_at NP\_848889.3  
 1417073\_a\_at, 14 NP\_068681.1, NP\_001152988.1, NP\_001152989.1  
 XP\_003945617.1  
 1429748\_at  
  
 1424111\_at, 1424 NP\_034645.2  
 1436627\_at  
 NP\_001030038.1  
 NP\_080586.1  
 NP\_038714.2  
  
 NP\_694791.2  
 1435630\_s\_at NP\_033364.2  
 XM\_003085122.1 XP\_003086086.1, XP\_003085170.1  
 A\_001113532.1, NP\_780603.1, NP\_001107004.1, NP\_001107005.1  
 1417193\_at, 1417 NP\_038699.2  
 1425009\_at, 1430 NP\_071706.2  
 1431799\_at, 1436 NP\_034936.1  
 1415935\_at, 1431 NP\_071710.2  
 NP\_780382.2  
 1428217\_at, 1428 NP\_001077350.1, NP\_080727.2, NP\_001077349.1, NP\_001077351.1  
 NP\_077212.3  
 1435774\_at  
 1419204\_at NP\_031891.2  
 1420052\_x\_at, 14 NP\_035315.1  
 1426469\_a\_at, 14 NP\_038712.3  
 1423534\_at NP\_032825.2  
 XP\_003945627.1  
 1420990\_at, 1431 NP\_031716.2  
 1428429\_at, 1428 NP\_848730.2  
 1433747\_at NP\_766415.1  
 XM\_003945994.1 XP\_003945628.1, XP\_003946043.1  
 1433705\_at NP\_001028668.2  
 XP\_003085202.2  
 1418481\_at NP\_075545.2  
 1423101\_at NP\_076313.1

NP\_082692.1

1426982\_at NP\_722486.2  
1424494\_s\_at NP\_084074.1  
1427902\_at NP\_780438.2

1428263\_a\_at NP\_080581.1  
NP\_001074868.2

1432312\_a\_at NP\_081920.1  
1423936\_at, 1423 NP\_081284.2  
1415729\_at, 1416 NP\_001074242.1, NP\_035192.2  
1434855\_at NP\_766523.2  
1416392\_a\_at, 14 NP\_033859.1  
, NM\_001163848.1 NP\_001157319.1, NP\_001157320.1, NP\_001157321.1, NP\_775278.3, NP\_001157322  
1422056\_at NP\_035077.1  
1428832\_at NP\_082332.1  
1422513\_at NP\_031660.3  
NP\_001026792.2  
1425496\_at NP\_038883.2, NP\_001034670.1

, NM\_009070.2, NP\_001073596.1, NP\_033096.2, NP\_001073597.1  
1428788\_at NP\_080230.2  
1415842\_at, 1415 NP\_001239392.1, NP\_001239393.1, NP\_064372.2, NP\_001239394.1  
NP\_783613.1  
1431338\_at NP\_082213.2  
NP\_038658.2  
NP\_001039363.1 NP\_035777.2, NP\_001034452.1  
1419433\_at NP\_032769.2  
1428954\_at, 1428 NP\_075938.2, NP\_075542.2  
NP\_001093134.1  
NP\_898972.1  
1416098\_at NP\_035652.2  
1426995\_a\_at NP\_075527.2  
1425151\_a\_at NP\_082264.2  
1415750\_at NP\_663371.2  
NP\_080481.1

1431766\_x\_at NP\_032529.2

1428322\_a\_at NP\_080960.1  
, NM\_025425.4 NP\_001157417.1, NP\_079701.1  
1422826\_at NP\_032366.2  
1416512\_at NP\_036086.1  
1417891\_at NP\_081417.2, NP\_001157222.1, NP\_001157223.1  
1429034\_at NP\_001156574.1  
1421971\_a\_at NP\_075749.1



NP\_062704.2  
 1416437\_a\_at, 14 NP\_038959.2, NP\_001156919.1, NP\_001156920.1, NP\_001156921.1, NP\_001156922  
 1433696\_at NP\_945175.1  
 1420325\_at, 1420 NP\_065633.2  
 1417255\_at NP\_598887.3  
 1430194\_at NP\_081023.1, NP\_001156888.1  
 1425821\_at NP\_036060.1  
 1424545\_at, 1424 NP\_898973.2  
 1428565\_at NP\_083065.1, NP\_001183953.1  
 1436526\_at NP\_766117.2  
 1431132\_x\_at NP\_080952.2, NP\_001157190.1  
 1427509\_at NP\_001156742.1  
 1422713\_a\_at, 14 NP\_001171080.1, NP\_001171081.1, NP\_035795.1  
  
 1422710\_a\_at, 14 NP\_067390.4, NP\_001157163.1  
 1435438\_at NP\_035577.1  
  
 1424259\_at NP\_083900.3  
     NP\_001157697.1  
     NP\_776102.1  
 1424743\_at NP\_082377.2  
 1416580\_a\_at, 14 NP\_062693.1  
 1426094\_at NP\_659065.1  
 1426822\_at NP\_666111.1  
 1426767\_at NP\_001157238.1  
 1417212\_at NP\_080909.1  
 1431126\_a\_at, 14 NP\_080962.1  
 1427566\_at NP\_001093924.1  
 1424331\_at, 1424 NP\_631893.1  
 1415946\_at, 1426 NP\_035952.2  
 105888.1  
 NP\_001162868.1, NP\_694780.1, NP\_001156340.1, NP\_001156341.1  
 1423495\_at NP\_036063.1  
 1416798\_a\_at NP\_062705.1  
  
 1434387\_at NP\_997100.1, NP\_001193264.1  
 1428255\_at, 1431 NP\_082466.2, NP\_080157.1  
 1435564\_at NP\_001075125.1  
     NP\_038670.1  
 1423333\_at, 1423 NP\_080446.1  
 1416328\_a\_at NP\_079548.1  
 1435169\_at NP\_084146.1  
     NP\_032726.1  
     NP\_444403.2  
 1416542\_at NP\_033369.2  
 NP\_026948.2 NP\_080583.3, NP\_081224.1  
 NP\_003086050.1, NP\_920298.3, NP\_003086098.1, NP\_003086099.1, NP\_990642.3, NP\_003085204.1, NP

1429125\_at NP\_001005916.1  
NP\_001013403.1  
, NM\_001166540.1 NP\_001160011.1, NP\_001160012.1, NP\_001160013.1, NP\_001160014.1, NP\_001160015.1  
NP\_001002895.2  
NP\_062811.1  
1416719\_a\_at, 14 NP\_080239.1  
, NM\_001044719.1 NP\_001028451.2, NP\_001038184.1  
1416197\_at NP\_035562.1  
NP\_001074238.1  
NP\_081112.1  
NP\_852078.1  
1436002\_at NP\_001004366.1  
141820.2, XR\_141342.2  
1434085\_at NP\_766205.1  
1424197\_s\_at NP\_001157291.1, NP\_001157292.1  
1431177\_a\_at NP\_035417.2  
1420593\_a\_at NP\_001091696.2, NP\_035696.3, NP\_001191085.1  
NP\_067453.1  
1416125\_at NP\_034350.1  
141343.1  
107054.3  
1423541\_at NP\_080566.2  
NP\_058075.2  
1425915\_at XP\_003085569.1, XP\_003085196.1  
1416703\_at, 1416 NP\_036081.1, NP\_001161980.1, NP\_001161985.1, NP\_001161986.1  
1435225\_s\_at NP\_001074784.1  
1430015\_at NP\_700439.1  
1416323\_at, 1416 NP\_080164.2  
1416252\_at, 1431 NP\_598876.1  
1416150\_a\_at, 14 NP\_038691.1  
1421679\_a\_at, 14 NP\_031695.1, NP\_001104569.1  
NP\_694806.1  
1428892\_at NP\_081121.1  
1416608\_a\_at, 14 NP\_085038.3  
1423006\_at, 1435 NP\_032868.2  
1432437\_at NP\_001156373.1, NP\_001156374.1  
1436053\_at NP\_941049.1  
1423681\_at NP\_067394.1  
105893.1  
NP\_083067.1  
1432062\_at NP\_001074629.1  
1419954\_s\_at, 14 NP\_683728.1  
1426601\_at NP\_694702.1, NP\_001229356.1  
NM\_001163748.1 NP\_032830.3, NP\_001157220.1  
1423138\_at, 1423 NP\_067297.2  
1424628\_a\_at NP\_001077360.1, NP\_084363.2  
1421233\_at NP\_057879.2

1423844\_s\_at, 14 NP\_659104.1, NP\_835742.1  
1422509\_at NP\_077149.2, NP\_001157241.1  
1419766\_at NP\_034961.2  
1428640\_at, 1428 NP\_083178.1  
^\_001163734.1 NP\_082520.2, NP\_001157206.1  
1421964\_at, 1421 NP\_032742.1  
1430724\_at NP\_001028335.1  
1424922\_a\_at NP\_932762.2, NP\_065254.3  
1433669\_at NP\_062748.2  
1417734\_at NP\_059504.2  
NP\_796281.1  
NP\_796333.3  
1425058\_at NP\_694703.2  
1425831\_at NP\_033568.2  
1426698\_a\_at NP\_084080.1, NP\_001103383.1  
1420239\_x\_at, 14 NP\_001239409.1, NP\_663461.2  
1417130\_s\_at NP\_065606.2  
NP\_109622.1  
1423763\_x\_at NP\_058540.1  
1422976\_x\_at, 14 NP\_075691.1  
NP\_001182227.1  
  
1419026\_at NP\_031855.3, NP\_001186662.1  
NP\_065650.1  
XM\_003945582.1 XP\_003945621.1, XP\_003945631.1, XP\_003946050.1  
1421812\_at NP\_033344.1, NP\_001020484.1  
NP\_033085.2  
1415744\_at NP\_034515.1, NP\_001172111.1  
1422709\_a\_at NP\_065628.1  
1419138\_at NP\_062293.1  
1421837\_at, 1421 NP\_035426.1  
^\_003689309.1 NP\_766208.2, XP\_003689357.1  
1425336\_x\_at, 14 NP\_001001892.2, XP\_003945794.1  
1422647\_at NP\_033092.3  
NP\_038571.2  
1416949\_s\_at NP\_001071177.1, NP\_032228.2  
1416990\_at NP\_035436.1, NP\_001192143.1, NP\_001192144.1, NP\_001192145.1  
1423578\_at NP\_034056.1  
105836.1, XR\_141828.1  
1423502\_at NP\_034368.2, NP\_001191902.1  
NP\_035059.2  
1418396\_at NP\_598877.1  
1418893\_at, 1418 NP\_059491.1  
1420428\_at NP\_031451.2  
1418302\_at NP\_062314.1

1423562\_at, 1423 NP\_112152.1  
NP\_112453.2  
1417334\_at NP\_062315.1  
1423116\_at NP\_291091.2, NP\_001157242.1  
1422584\_at NP\_067312.2  
^\_001045863.1, NI NP\_613046.2, NP\_001039328.1, NP\_001039329.1  
^\_001142706.1 NP\_032224.2, NP\_001136178.1  
1436382\_at NP\_942589.3  
1426888\_at NP\_665829.1, NP\_671493.1  
\_015536.1  
  
1427126\_at, 1427 NP\_034608.2  
NP\_034609.2  
1419625\_at NP\_038586.2  
XM\_003945583.1 XP\_003945795.1, XP\_003945632.1, XP\_003945622.1, XP\_003945786.1, XP\_0039460!  
^\_001110101.2, NI NP\_085100.1, NP\_001103571.1, NP\_001191202.1, NP\_001191203.1  
NP\_035820.3  
NP\_683749.1  
NP\_683741.1  
1416728\_at NP\_034105.1  
1420284\_at, 1423 NP\_115849.2, NP\_001122069.1  
NP\_258438.1  
1419095\_a\_at, 14 NP\_061286.1  
1433890\_a\_at NP\_001239397.1, NP\_001239398.1, NP\_476512.1  
1422799\_at, 1422 NP\_064411.2, NP\_001185973.1  
1418204\_s\_at NP\_062340.1  
1425548\_a\_at NP\_034864.2  
1419135\_at NP\_032544.1  
1419607\_at NP\_038721.1  
1420353\_at NP\_034865.1  
NP\_035039.1  
1417799\_at NP\_075668.1  
^\_001252457.1 NP\_062667.1, NP\_001239386.1  
1424948\_x\_at NP\_034510.3  
1431008\_at NP\_997531.1, XP\_003946368.1  
1434349\_at NP\_780346.3  
1417093\_a\_at NP\_034494.1  
1415797\_at, 1415 NP\_766550.1, NP\_031610.1, NP\_001185760.1, NP\_001185762.1  
NP\_032053.1  
1416256\_a\_at NP\_035785.1  
1434837\_at NP\_001010833.2  
1430894\_at  
1417971\_at NP\_598883.1  
1431299\_a\_at NP\_780451.1, NP\_001140182.1, NP\_001140183.1  
1423925\_at NP\_081263.2  
1434155\_a\_at NP\_001028802.1  
1429006\_s\_at, 14: NP\_082752.3, NP\_001136216.1, NP\_001136217.1

1420157\_s\_at, 14 NP\_038882.1

1424145\_at NP\_663462.2, NP\_001159364.1

1418646\_at, 1418 NP\_032162.2

1418851\_at NP\_077788.2, NP\_840065.1

1422051\_a\_at, 14 NP\_062312.3

1420906\_at, 1420 NP\_033977.3

1422740\_at NP\_848704.1

^\_001161366.1, N|NP\_940810.2, NP\_001154838.1, NP\_001154839.1

1431201\_at NP\_082987.1

1418780\_at NP\_061375.1

1424704\_at, 1425 NP\_001139510.1, NP\_033950.2, NP\_001139392.1

1434963\_at NP\_848767.1

1428092\_at NP\_690023.1

1419344\_at NP\_038716.2

1434199\_at NP\_001013771.1

1431843\_a\_at NP\_032716.2

1423927\_at, 1429 NP\_082938.1

1416364\_at, 1416 NP\_032328.2

, NM\_022880.3, N|NP\_001186042.1, NP\_075018.1, NP\_001186043.1, NP\_001186044.1, NP\_001186045

, NM\_001177469.1 NP\_001170939.1, NP\_001170940.1, NP\_001170941.1

NP\_937810.2

141836.1

NP\_081008.1

1420909\_at NP\_001020421.2, NP\_033531.3, NP\_001020428.2, NP\_001103736.1, NP\_001103737

1420988\_at NP\_109640.1

1428560\_at NP\_082474.1

1417041\_at NP\_033111.2

NP\_663328.2

NP\_001104612.1

1426691\_at NP\_001239402.1, NP\_001239403.1, NP\_083027.1, NP\_001239404.1

1420807\_a\_at NP\_997549.2

1428009\_a\_at NP\_660122.1, NP\_733780.1

1427620\_at NP\_001074804.2

1418255\_s\_at, 14 NP\_065239.1

NP\_780377.1

1417108\_at, 1425 NP\_083367.1

NP\_079578.1

1417039\_a\_at NP\_079887.3

NP\_033384.2

1424078\_s\_at NP\_663463.1

1421760\_at NP\_035325.1

1417348\_at NP\_080242.1

1426386\_at NP\_079709.2

105845.1

1424644\_at NP\_848472.2

1427163\_at, 1429 NP\_001170845.1, NP\_666190.2

^\_001097623.1 NP\_766210.1, NP\_001091092.1  
1415907\_at NP\_001075104.1, NP\_031658.1, NP\_001075105.1  
1422767\_at NP\_058555.3  
1416826\_a\_at NP\_064432.1  
NP\_940813.1  
^\_001164729.1 NP\_079641.1, NP\_001158201.1  
  
1423087\_a\_at XP\_355019.5, XP\_003085199.2  
1424449\_at NP\_659188.1  
1415786\_at NP\_080249.2  
1422566\_at NP\_035679.3, NP\_001155194.1, NP\_001155195.1  
1420713\_a\_at, 14 NP\_034913.2, NP\_001103443.1  
1429719\_at, 1431 NP\_083043.2, NP\_001104294.1, NP\_001104295.1  
1422082\_a\_at, 14 NP\_035043.1, NP\_001104302.1  
NP\_997102.2  
1417889\_at NP\_033824.1  
1428696\_at NP\_852062.1  
1419542\_at NP\_034151.3  
1426450\_at NP\_038908.2  
1430808\_at NP\_082438.3  
1416426\_at NP\_080163.1  
1434037\_s\_at NP\_001177775.1, NP\_064389.2  
1424148\_a\_at NP\_666046.1  
NP\_080806.4  
1416338\_at NP\_001239400.1, NP\_038692.1  
NP\_038761.1  
1417557\_at NP\_077752.1  
1416597\_at NP\_032259.1  
1424937\_at NP\_001070816.1, NP\_080150.2  
1417290\_at NP\_084072.1  
^\_001130456.1 NP\_038690.1, NP\_001123928.1  
1423583\_at NP\_034322.3  
1429102\_at NP\_084075.1  
1415810\_at, 1415 NP\_035061.3, NP\_001104548.1, NP\_001104550.1, NP\_001104549.1  
1426794\_at, 1426 NP\_035348.2, NP\_001239382.1, NP\_001239384.1, NP\_001239385.1  
105855.1  
1427987\_at, 1427 NP\_001025150.2  
1432911\_at NP\_001156772.1  
1427237\_at, 1427 NP\_694792.1  
NP\_061200.2  
1428365\_a\_at NP\_083058.2  
1431586\_at, 1434 NP\_780559.2  
, NM\_001252467.1 NP\_001239395.1, NP\_001239396.1, NP\_082209.1  
1433687\_at NP\_849257.1, NP\_001159946.1  
NP\_081520.1  
NP\_032764.1  
1424066\_at NP\_659107.2

1421060\_at, 1434 NP\_071723.1  
1421796\_a\_at NP\_034239.1, NP\_997537.1  
1430241\_at NP\_056609.1  
168568.1  
1424442\_a\_at, 14 NP\_659108.1, NP\_001020480.1  
NP\_032575.2  
1416465\_a\_at, 14 NP\_038961.2  
1416165\_at, 1431 NP\_598446.2  
1424294\_at NP\_666193.2, NP\_001107603.1  
1417248\_at NP\_033093.2, NP\_001185878.1  
1421832\_at, 1426 NP\_075540.1  
1435230\_at, 1436 NP\_001020743.1  
1430690\_at  
1428179\_at NP\_082664.1  
1424597\_at NP\_081109.1, NP\_001032846.1  
1429053\_at NP\_766551.3, NP\_001107570.1  
1427992\_a\_at NP\_077768.2  
1422541\_at NP\_033010.2  
1418153\_at NP\_032506.2  
NP\_001193590.1  
1419062\_at, 1426 NP\_038841.1  
1435909\_at  
1422286\_a\_at NP\_033398.2, NP\_001157546.1, NP\_001157547.1, NP\_001157548.1, NP\_001157549

1428608\_at, 1428 NP\_075891.1  
1420820\_at NP\_080340.2  
1428251\_at NP\_083163.3  
1417445\_at NP\_075783.2  
1429470\_at NP\_083530.1, NP\_001136103.1  
\_027952.1, NR\_027953.1  
1428389\_s\_at, 14 NP\_783570.1  
NP\_031465.2  
1433593\_at NP\_081442.1  
1425208\_at, 1429 NP\_084275.3  
1434690\_at NP\_001074540.1, NP\_001171438.1, NP\_001171439.1  
1420339\_at NP\_598532.1  
1423767\_at NP\_077746.3, NP\_001139694.1, NP\_001139695.1, NP\_001139696.1  
, NM\_016962.2 NP\_001156342.1, NP\_058658.2  
1426416\_a\_at, 14 NP\_080693.2  
1419562\_at, 1419 NP\_031592.2  
1419786\_at NP\_064303.2, NP\_996841.1  
1426951\_at NP\_056615.1  
1422036\_at NP\_035630.2  
1422642\_at NP\_080790.1  
168760.1  
1432120\_at NP\_958749.1  
1416612\_at, 1416 NP\_034124.1

1416793\_at, 1416 NP\_062691.3, NP\_835151.2  
1425255\_s\_at, 14 NP\_659051.3  
1424033\_at, 1424 NP\_001182414.1, NP\_001182415.1, NP\_666195.1, NP\_001182416.1  
1422236\_at NP\_080627.2  
1436410\_at NP\_001138924.1

1421884\_at, 1421 NP\_033257.2  
1426759\_at NP\_001074826.1  
1428726\_at NP\_082414.1  
NP\_598878.2  
NP\_705732.1  
NP\_001001806.1  
NP\_898842.2  
1424353\_at NP\_082509.2  
1426345\_at, 1426 NP\_001157094.1, NP\_666096.3, NP\_001157095.1, NP\_001157096.1  
1432504\_at, 1435 NP\_082852.1  
1431168\_at  
1426637\_a\_at, 14 NP\_035511.2  
1427436\_at NP\_035510.1  
1436375\_at, 1436 NP\_084409.3  
1435198\_at  
NP\_035234.1  
1435436\_at NP\_034267.3  
1423349\_at, 1423 NP\_062628.2  
1424024\_at NP\_647456.1, NP\_789778.1  
1430686\_at  
1429740\_at, 1435 NP\_082915.1  
NP\_031615.1  
NP\_954859.1  
XM\_003945581.1 XP\_003946058.1, XP\_003945630.1  
1416915\_at NP\_034960.1  
1434108\_at NP\_001074503.1  
NP\_851305.2  
1428240\_at, 1433 NP\_064648.3, NP\_796258.2  
1418322\_at, 1430 NP\_038526.2, NP\_001104320.1, NP\_001104321.1, NP\_001104322.1, NP\_001104323

1419765\_at NP\_083678.2  
1423753\_at NP\_080781.1  
NP\_080433.1  
1428535\_at NP\_001075432.1  
NP\_848837.3

1418926\_at, 1420 NP\_035676.1  
1431052\_at NP\_083553.2, NP\_001034781.1  
1418427\_at, 1418 NP\_032474.2  
1418850\_at, 1429 NP\_031961.1, NP\_081773.1



NP\_808263.2  
1\_001146298.1, NP\_694725.3, NP\_001139770.1  
1423348\_at NP\_032084.2  
1428413\_at, 1428 NP\_080760.2  
1420042\_at, 1420 NP\_705780.1  
1423444\_at, 1423 NP\_033097.1  
NP\_001077097.1  
1424324\_at, 1424 NP\_001074691.1  
NP\_033252.1  
1417946\_at NP\_598891.1  
1432031\_at  
168766.1  
1425463\_at, 1425 NP\_034388.2  
1427061\_at, 1427 NP\_001074692.1, NP\_001239424.1  
  
1422477\_at NP\_071304.2, NP\_001139759.1  
  
1423086\_at NP\_032746.2  
1426223\_at NP\_082617.2  
1416823\_a\_at NP\_001239418.1, NP\_001239419.1, NP\_997413.2, NP\_001239420.1, NP\_001239421  
1419360\_a\_at, 14 NP\_033306.2, NP\_001154841.1, NP\_001154842.1, NP\_001154843.1  
1431193\_at, 1435 NP\_001093919.1  
1422293\_a\_at, 14 NP\_001136203.1, NP\_598873.2  
1418815\_at NP\_031690.3  
  
1428969\_at NP\_083767.2, NP\_796012.2  
1419368\_a\_at, 14 NP\_062680.2, NP\_997506.1  
NP\_001028617.2  
1435892\_at NP\_001161249.1  
1425361\_at, 1435 NP\_081283.2  
1422810\_at, 1426 NP\_067534.2  
1423236\_at, 1423 NP\_038842.3, NP\_001153876.1  
NP\_080805.1  
NP\_659110.1  
1424674\_at, 1424 NP\_631882.2  
1415774\_at NP\_067423.2  
1429352\_at NP\_081055.1  
1435551\_at NP\_780485.2  
1418134\_at NP\_080441.1  
1424258\_at NP\_081377.1, NP\_081278.1  
1418338\_at, 1423 NP\_001164437.1, NP\_001164438.1, NP\_083142.2, NP\_001164441.1  
NP\_775617.1  
1422250\_at NP\_036076.2  
  
1423618\_at, 1425 NP\_033798.1, NP\_001076803.1

1423735\_a\_at NP\_659112.2, NP\_001103485.1, NP\_001103486.1  
A\_001109988.1, NP\_444308.1, NP\_001103458.1, NP\_001103459.1, NP\_001254646.1

\_038152.1

NP\_038540.2

1420956\_at, 1420 NP\_031488.2

NP\_079803.2

1419398\_a\_at, 14 NP\_031900.3

1434620\_s\_at NP\_666196.1

1427192\_a\_at, 14 NP\_084423.2

, NM\_001166407.1, NP\_001159878.1, NP\_001159879.1, NP\_033030.1

1433430\_s\_at NP\_848124.1

1422252\_a\_at NP\_033990.2

168768.1

NP\_780313.1

1428320\_at NP\_001074725.1

1417065\_at NP\_031939.1

1420023\_at, 1420 NP\_659115.3

1418503\_at, 1418 NP\_034611.2

1431235\_at

1434888\_a\_at NP\_034901.2

NP\_080696.1

1431469\_a\_at NP\_598448.1

NP\_001161363.1

1420628\_at NP\_033015.1

NP\_291062.1

NP\_291063.1

NP\_291064.1

1423628\_s\_at NP\_291052.3

NP\_291065.3

NP\_291053.1

NP\_291066.1

NP\_291067.1

NP\_291068.2

NP\_291054.1

NP\_291069.1

NP\_291055.1

NP\_291070.1

NP\_291056.1

NP\_291071.1

NP\_291057.1

NP\_291072.1

NP\_291058.1

NP\_291073.1

NP\_291059.1  
NP\_291060.1  
1421143\_at NP\_031884.1  
1426437\_s\_at NP\_034541.2  
1434147\_at NP\_722488.2  
1427155\_at NP\_783615.2  
1422429\_at, 1425 NP\_064396.2, NP\_001158093.1, NP\_001158094.1  
NP\_036067.2  
1424820\_a\_at, 14 NP\_075372.1  
1422020\_at, 1422 NP\_036028.2  
168769.1  
1430957\_at, 1435 NP\_780373.3  
1421866\_at, 1421 NP\_032199.3  
1421033\_a\_at, 14 NP\_001034563.1  
1415877\_at NP\_033494.1, NP\_001129558.1  
XP\_003689001.1  
1426451\_at XP\_001477550.1  
NP\_001156485.1  
NP\_536713.1  
1428890\_at NP\_775599.1  
1419917\_s\_at, 14 NP\_079974.1  
1424343\_a\_at, 14 NP\_034250.3  
NP\_080493.2  
1422593\_at NP\_033811.1  
NP\_083284.1  
1421414\_a\_at, 14 NP\_061214.2  
1424672\_at NP\_001074840.2  
1416121\_at NP\_034858.2  
1423499\_at, 1430 NP\_080684.3, NP\_001186080.1, NP\_001186082.1, NP\_001186083.1  
NP\_080662.1  
NP\_001028453.1  
1429383\_at, 1429 NP\_690022.2  
1423520\_at, 1423 NP\_034851.2  
1430918\_at NP\_796089.1  
1417622\_at, 1417 NP\_033220.2  
NP\_034311.2  
NP\_780715.1  
1429417\_at NP\_001074797.1  
1420861\_at, 1420 NP\_080578.1  
NP\_080052.1  
1430738\_at NP\_579941.2, XP\_003689519.1  
1427045\_at, 1434 NP\_796314.2, NP\_001103445.1  
XM\_003946021.1 XP\_003945633.1, XP\_003946070.1  
1436586\_x\_at NP\_065625.2  
1423600\_a\_at, 14 NP\_035682.1, NP\_001185913.1  
NP\_034010.3  
1417148\_at NP\_001139740.1, NP\_032835.2

1418044\_at NP\_840061.1, NP\_598895.2  
NP\_573512.1

1424827\_a\_at, 14 NP\_666199.1  
1427654\_a\_at NP\_032339.2  
1424069\_at, 1424 NP\_082293.1  
1430736\_at NP\_001034574.4  
1423299\_at, 1435 NP\_058072.2  
NP\_001001488.2  
1423269\_a\_at, 14 NP\_114087.2, NP\_001107858.1

NP\_079744.1  
1418558\_at NP\_038861.2  
105916.1  
1419951\_at, 1428 NP\_001165533.1, NP\_081676.1  
NP\_848908.1  
105917.1  
1\_177137.4 NP\_034437.1, NP\_796111.2  
1418816\_at, 1418 NP\_077152.1  
NP\_766218.1  
1418665\_at NP\_444491.1  
1416431\_at NP\_080749.2  
1427206\_at, 1427 NP\_081406.1  
1425224\_at NP\_659116.1  
NP\_001074542.1  
1425373\_a\_at NP\_598899.1  
1417140\_a\_at, 14 NP\_001120649.1, NP\_033003.1  
1420386\_at, 1424 NP\_082388.1, NP\_001034177.1

1427181\_at, 1427 NP\_766219.2  
NP\_766555.1  
1426317\_at NP\_083295.1  
NP\_001034303.3  
1419228\_at, 1421 NP\_444485.2  
1426572\_at, 1426 NP\_663469.1  
1435367\_at NP\_766220.2  
1425184\_at, 1432 NP\_079857.3, NP\_001157827.1  
NP\_083144.1  
NP\_963894.1  
NP\_001002239.2

1415752\_at NP\_001001181.1  
1423736\_a\_at, 14 NP\_082003.1  
1423389\_at NP\_001036125.1  
1436047\_at NP\_958742.2  
1425819\_at, 1433 NP\_663331.1  
1417424\_at NP\_079685.1



NP\_780592.1  
1417897\_at, 1426 NP\_598916.1  
1417439\_at NP\_473383.1  
1433802\_at NP\_001001885.1  
1417524\_at NP\_034050.1  
1424064\_at NP\_083852.1  
1418214\_at NP\_032477.2  
1435762\_at NP\_694769.2  
1429362\_a\_at, 14 NP\_084385.2  
NP\_001019888.1  
1421081\_a\_at, 14 NP\_035923.1, NP\_001033320.1  
1428542\_at NP\_081512.1  
NP\_058578.3

XM\_003086109.2 XP\_003085425.2, XP\_003086157.2  
1436146\_at

NP\_077138.1  
1418775\_at NP\_598910.2, NP\_001243444.1  
1417487\_at, 1417 NP\_034365.1  
1435589\_at NP\_001230236.1, NP\_941018.1  
1422516\_a\_at, 14 NP\_001240761.1, NP\_067413.1  
1422632\_at NP\_034115.2  
1417018\_at NP\_067449.3, NP\_001157824.1  
1431885\_a\_at NP\_082153.3  
NP\_031713.1  
1433449\_at NP\_001019731.1  
1419051\_at, 1419 NP\_064319.1  
NP\_001028620.1  
1417427\_at, 1435 NP\_080892.1  
1433980\_at, 1433 NP\_848752.1, NP\_001186176.1, NP\_001186177.1, NP\_001186178.1  
1419536\_a\_at NP\_033071.1  
1416206\_at NP\_001158040.1, NP\_035509.4, NP\_001157952.1, NP\_001157953.1, NP\_001157954  
NP\_659117.2  
NP\_071295.2  
1416804\_at NP\_444482.2, NP\_001108067.1, NP\_001108068.1, NP\_001108069.1  
1416914\_s\_at NP\_852117.2, NP\_075655.2  
1417725\_a\_at, 14 NP\_065237.3  
141873.1  
1418049\_at NP\_032546.2  
1430354\_x\_at NP\_076401.1  
1418188\_a\_at, 1418189\_s\_at, 1427285\_s\_at, 1429060\_at, 1436202\_at  
1428750\_at NP\_081048.1  
1417228\_at, 1417 NP\_031626.1, NP\_001103974.1

1428070\_at NP\_083045.4, NP\_001158181.1  
1423218\_a\_at, 14 NP\_080522.1

1417452\_a\_at NP\_001153711.1, NP\_001177365.1, NP\_032016.1  
 1416651\_at NP\_038887.2  
 NP\_082730.2  
 1429834\_a\_at NP\_001074510.1  
 NP\_001104787.1  
 1417119\_at NP\_077193.1  
 1416802\_a\_at NP\_080686.1  
 1422549\_at NP\_062696.2  
 1421497\_at NP\_569720.1  
 1426811\_at NP\_937811.1  
 1426843\_at NP\_919329.2  
 1416010\_a\_at, 14 NP\_034249.1  
 1436197\_at NP\_001028514.1  
 1416347\_at, 1416 NP\_001161960.1, NP\_032609.1, NP\_001161961.1, NP\_001161962.1  
 1428297\_at, 1434 NP\_033032.1  
 1422321\_a\_at, 14 NP\_035880.2, NP\_001104261.1  
 1435907\_at NP\_001192163.1, NP\_064649.2, NP\_001192164.1  
 NP\_064308.1  
  
 NP\_001074760.1  
 NP\_001034583.1  
 1421419\_at NP\_032457.1  
 1436377\_at NP\_001170831.1, NP\_001170832.1, NP\_997103.1, NP\_001170833.1  
 1416582\_a\_at, 14 NP\_031548.1  
 NP\_032900.2  
 NP\_032915.2  
 A\_001166368.1 NP\_032046.1, NP\_001159840.1  
 , NM\_011697.3 NP\_001172093.1, NP\_035827.1  
 1417934\_at NP\_065591.1  
 NP\_080951.1  
 \_027351.1 NP\_705825.2  
 1419687\_at NP\_598908.2  
 1417705\_at NP\_598911.1  
 NP\_031776.1  
 NP\_081919.1  
 1417302\_at NP\_473389.1  
 1415952\_at, 1415 NP\_001073857.1, NP\_001073859.1, NP\_031954.2, NP\_001073858.1  
 1436663\_at NP\_001028311.2, NP\_001161303.1  
 1430061\_at  
 NP\_780590.3  
 1418101\_a\_at, 14 NP\_001003933.1, NP\_444306.1, NP\_001003934.1  
 1425364\_a\_at NP\_0011154885.1, NP\_032603.3  
 1433674\_a\_at, 1433675\_at  
  
 1416890\_at NP\_598900.1  
 NP\_001170818.1  
 A\_001167799.1 NP\_062803.4, NP\_001161271.1

1416791\_a\_at NP\_058093.2  
1416628\_at NP\_080067.1  
14028418.1, NR\_02 NP\_080601.2  
, NM\_146092.2 NP\_001171269.1, NP\_666204.2  
1429207\_at  
1429208\_at  
1417886\_at NP\_079739.1  
1417887\_at, 1434 NP\_789813.1  
1415787\_at NP\_032086.1  
1416960\_at, 1431 NP\_077218.1  
NP\_033099.3  
NP\_659121.1  
1423165\_a\_at NP\_035972.3  
NP\_932110.1  
1417364\_at NP\_080283.3  
1428057\_a\_at, 14 NP\_033773.1, NP\_001035048.1  
1423092\_at, 1423 NP\_057901.2  
1427021\_s\_at NP\_034369.1  
1428841\_at NP\_036043.2  
1419991\_at, 1419 NP\_653121.1  
1418773\_at, 1435 NP\_068690.3  
1419031\_at NP\_062673.1  
1423680\_at NP\_666206.1  
NP\_932782.2  
1423012\_at NP\_775091.2, NP\_775090.1, NP\_061271.1  
NP\_001104610.1  
1428880\_at NP\_079609.2  
1415730\_at NP\_758506.3, NP\_001157744.1  
1426217\_at NP\_081074.1  
NP\_082687.1  
1434245\_a\_at NP\_958739.1  
1425300\_at NP\_663471.1  
1415735\_at NP\_056550.1  
1426227\_s\_at NP\_852068.1  
1416032\_at, 1416 NP\_598903.1  
1419839\_x\_at NP\_001240772.1, NP\_001240773.1, NP\_598890.1  
1422275\_at NP\_034092.1  
NP\_076220.2  
1436545\_at NP\_766030.3  
1422628\_at NP\_080916.1  
  
, NM\_001167907.1 NP\_001013784.2, NP\_001161379.1  
1425650\_at, 1430 NP\_035730.2  
NP\_001205339.1 NP\_803155.1, NP\_001192268.1  
1436352\_at NP\_932136.2  
  
1428938\_at, 1428 NP\_032165.3



1420385\_at NP\_032163.3  
1430154\_at, 1431 NP\_766616.2  
1415737\_at, 1416 NP\_062310.1  
1424605\_at NP\_001156616.1, NP\_001177412.1  
NP\_059071.1  
1425646\_at NP\_663472.1  
1429458\_at NP\_080396.2, XP\_003946076.1, XP\_003946077.1, XP\_003946075.1  
1423879\_at NP\_808308.1  
XP\_003945642.1  
1416083\_at, 1416 NP\_033577.1  
1416841\_at NP\_079699.1  
1433412\_at, 1433 NP\_666208.2  
1424711\_at NP\_001028931.1, NP\_114386.3  
1422264\_s\_at, 14 NP\_034768.2  
  
1426270\_at, 1426 NP\_001239613.1, NP\_001239614.1, NP\_722503.1  
1431073\_at, 1432 NP\_082484.1  
NP\_796008.2  
1421833\_at, 1421 NP\_032872.1  
1430769\_s\_at NP\_080796.1  
1433742\_at NP\_852069.4  
1423582\_at NP\_056641.2  
1420182\_x\_at NP\_796334.2  
1430526\_a\_at NP\_080279.1, NP\_035546.2  
1425413\_at NP\_035395.2, NP\_001159886.1  
1430353\_at NP\_780668.3  
  
1417740\_at, 1430 NP\_080226.1  
1416730\_at NP\_067500.1  
  
1431023\_at NP\_001074788.1  
NP\_766424.2  
1435167\_at NP\_808389.2  
NP\_659122.2  
1426575\_at, 1426 NP\_659041.3, NP\_001161997.1, NP\_001161998.1  
1431163\_at  
1423265\_at, 1429 NP\_034929.1  
1417555\_at NP\_080763.2  
1422553\_at NP\_032986.1  
1418546\_a\_at, 14 NP\_083958.3  
1418715\_at, 1429 NP\_076281.1, NP\_001107811.1  
1433944\_at NP\_001156943.1, NP\_766225.2  
1428388\_at NP\_001157107.1  
NP\_082539.2  
1435248\_a\_at, 14 NP\_001074175.1  
NP\_938042.2

1428843\_at, 1429 NP\_081590.3, NP\_001157808.1, NP\_001157809.1  
1435306\_a\_at NP\_034745.1  
1424230\_at, 1424 NP\_780562.2

^\_001164362.1, N|NP\_083036.2, NP\_001157834.1, NP\_082569.1

1435675\_at NP\_666064.3

1417541\_at, 1430 NP\_032260.2

XM\_994191.4 XP\_001000795.4, XP\_999285.4

NP\_766427.1

1428629\_at NP\_082595.1

1416509\_at, 1428 NP\_579930.1

1421285\_at, 1429 NP\_113553.1

NP\_032069.2

NP\_808271.1

1434239\_at NP\_955518.1

1426554\_a\_at NP\_075907.2

1432052\_at NP\_079920.1, NP\_001158033.1

1421115\_a\_at NP\_076229.2

1417967\_at, 1431 NP\_082428.1

1424432\_at NP\_663475.1

1433538\_at NP\_899018.1

^\_001141983.1 NP\_081970.1, NP\_001135455.1

1434965\_at NP\_803415.1

1425827\_at, 1427 NP\_032725.1

1431179\_at, 1432 NP\_444333.3

1426693\_x\_at NP\_659123.2

1418473\_at NP\_079806.2, NP\_001107034.1

1427033\_at, 1431 NP\_082305.1

1424210\_at NP\_663477.3, NP\_001157831.1, NP\_001157832.1

1417091\_at, 1428 NP\_031726.2, NP\_001155882.1

1431016\_at, 1434 NP\_001074546.1

NP\_035167.4

NP\_001074694.1

NP\_036106.1

1415681\_at NP\_444394.1

1434168\_at NP\_722491.2

1426409\_at NP\_663478.2, NP\_001123997.1, NP\_001123998.1

1436528\_at NP\_849260.2

1422323\_a\_at, 14 NP\_034821.2

1417226\_at NP\_038935.1

^\_001166361.1, N|NP\_034335.1, NP\_001159833.1, NP\_001159834.1, NP\_001159835.1

NP\_032749.1

1422900\_at, 1422 NP\_076288.1

1421783\_a\_at, 14 NP\_109641.2, NP\_663749.1, NP\_663750.1

1429271\_at NP\_938038.2

1435932\_at NP\_789742.2

A\_001113408.1 NP\_034827.1, NP\_001106879.1  
 1426381\_at NP\_001074683.1  
 1428869\_at, 1428 NP\_001034440.1, NP\_001034441.1, NP\_444316.2, NP\_001034442.1  
 1420722\_at NP\_031729.1  
 NP\_032878.1  
 1415709\_s\_at, 14 NP\_849261.2  
 1436524\_at  
 1425902\_a\_at, 14 NP\_001170840.1, NP\_001170841.1, NP\_062281.1  
 1435780\_at NP\_082903.2  
 1417855\_at NP\_598455.2  
 1418385\_at, 1431 NP\_001157762.1, NP\_077154.2, NP\_001157763.1, NP\_001157764.1, NP\_001157765

1428139\_at NP\_083462.2  
 1418577\_at NP\_444330.2  
 NP\_062692.1  
 1435896\_at NP\_444426.3  
 1417201\_at, 1425 NP\_001157835.1, NP\_001157837.1, NP\_084086.3  
 1418178\_at NP\_666212.3  
 1435474\_at NP\_796316.2

A\_001163480.1 NP\_067335.4, NP\_001156952.1  
 1422163\_at, 1428 NP\_032044.2, NP\_001158189.1  
 1425194\_a\_at NP\_080653.2  
 1430911\_at NP\_081835.2  
 1416531\_at NP\_034492.1  
 A\_030051.1 NP\_080895.2, NP\_084327.1  
 1431894\_at, 1433 NP\_001001738.2  
 1422443\_at NP\_573479.2  
 1423297\_at, 1423 NP\_038786.2, NP\_001157571.1, NP\_001157572.1, NP\_001157573.1  
 1425732\_a\_at NP\_001008542.2, NP\_001008543.1, NP\_034977.1  
 1429043\_at NP\_766017.1  
 NP\_001078859.1  
 NP\_031816.2  
 1429024\_at NP\_001164318.1  
 1418840\_at NP\_035180.2, NP\_001161963.1, NP\_001161964.1

1423022\_at, 1433 NP\_031443.4  
 1419499\_at, 1425 NP\_032175.2  
 1423300\_at NP\_080159.3, NP\_001028745.1  
 1419189\_at, 1419 NP\_058558.1  
 1425229\_a\_at, 14 NP\_033359.2, NP\_001136390.1, NP\_001136391.1, NP\_001136392.1, NP\_001136393  
 1417904\_at, 1432 NP\_061301.3  
 1429145\_at, 1433 NP\_080087.1  
 1431131\_s\_at, 14 NP\_739563.1  
 1421513\_at NP\_113564.2, NP\_001002238.1, NP\_001002241.1, NP\_001002240.1  
 , NM\_001177797.1 NP\_001171267.1, NP\_001171268.1, NP\_666214.1

1423875\_at, 1423 NP\_663480.3  
1419922\_s\_at NP\_852080.3  
1430040\_at, 1434 NP\_780408.1  
1435440\_at, 1435 NP\_001028394.2

NP\_034262.2

1432028\_at, 1434 NP\_001028344.2, NP\_001157839.1  
XM\_003946035.1 XP\_003945641.1, XP\_003946084.1

NP\_083924.2

NP\_963909.2

1424982\_a\_at, 14 NP\_001165567.1, NP\_001165568.1, NP\_084473.1

1436648\_at NP\_848508.2

1416659\_at, 1416 NP\_034253.3

NP\_001074630.1

1423581\_at NP\_032734.1

1422979\_at, 1433 NP\_073561.2

1417095\_a\_at NP\_056580.2

XM\_003689336.1 XP\_003688821.1, XP\_003689384.1

NP\_808315.1

1426389\_at NP\_796317.2

NP\_082024.2

1416058\_s\_at NP\_065640.2, NP\_001106209.1

1427317\_at NP\_079556.1

1416432\_at NP\_001171223.1, NP\_001171224.1, NP\_573495.2, NP\_001171225.1, NP\_001171226

NP\_690037.1

NP\_056607.1

1428239\_at NP\_796242.2

NP\_035831.2

NP\_665837.1

, NM\_013935.3 NP\_001012396.2, NP\_038963.3

1416861\_at, 1416 NP\_035614.1

, NM\_023116.4, NP\_001239462.1, NP\_075605.1

1427491\_at, 1432 NP\_083226.3, NP\_001159413.1, NP\_001159414.1, NP\_001159415.1

NP\_083742.2

1418912\_at, 1431 NP\_080438.2

1429791\_at

1430580\_at NP\_082593.2

1420869\_at, 1420 NP\_001239489.1, NP\_001239490.1, NP\_034934.2

XM\_003946072.1 XP\_003945375.1, XP\_003946121.1

1420500\_at, 1420 NP\_001177746.1, NP\_031895.1

1433539\_at NP\_680087.1

1417493\_at NP\_031578.2

XP\_003945376.1

NP\_001001334.2

XP\_003945374.1

1419279\_at, 1419 NP\_032871.3

1429915\_at

NP\_081991.1

1428368\_at, 1428 NP\_001121556.2, NP\_001074833.3

1423177\_a\_at, 14 NP\_001070658.1, NP\_001070660.1, NP\_666106.1, NP\_031406.2, NP\_001070661.1  
, NM\_172545.3, NP\_001103156.1, NP\_766133.2, NP\_001103157.1, NP\_001012536.2

1424578\_at NP\_001155957.1, NP\_848495.2

1419522\_at NP\_080297.1

1429220\_at, 1429 NP\_080320.1

1428588\_a\_at, 14 NP\_001026978.2

NP\_666363.3

, NM\_001039386.1 NP\_001034476.1, NP\_001034475.1, NP\_064672.2, NP\_001171125.1, NP\_001171126

1417985\_at, 1417 NP\_080256.2

1428292\_at, 1435 NP\_001075945.1, NP\_001239470.1, NP\_001239471.1

1426277\_at NP\_796318.2

1426809\_at NP\_780495.2

NP\_075953.1

1415707\_at NP\_780509.2

1435680\_a\_at, 14 NP\_114031.2

NP\_001028465.1

1429404\_at, 1429 NP\_001074554.1

1418259\_a\_at NP\_033979.2

1415919\_at NP\_032747.2

1429935\_at NP\_084234.1

NP\_081338.1

1417476\_at NP\_038936.1

NP\_033448.2

NP\_067494.1

NP\_001074668.2

1427903\_at NP\_083569.1

1436445\_at NP\_001005424.2

1435067\_at NP\_001019787.2

1431533\_at NP\_084135.1

1435530\_at NP\_001108548.1

1433618\_at NP\_001243450.1, NP\_001243451.1

1435469\_at NP\_705787.1

1430052\_at XP\_003945377.1, XP\_003946115.1

1423689\_a\_at, 14 NP\_700459.2, NP\_001186075.1, NP\_001186076.1

1428913\_at, 1435 NP\_081104.1, NP\_001132975.1, NP\_001132976.1

NP\_001032836.1

NP\_033572.1 NP\_758842.1

1429554\_at, 1431 NP\_001078877.1, NP\_080839.2, NP\_001078876.1

1424661\_at, 1424 NP\_775272.1

1423229\_at, 1423 NP\_149125.1

1426814\_at, 1426 NP\_694765.2  
141954.1  
1418633\_at, 1418 NP\_032740.3  
1428821\_at NP\_080488.1  
1417147\_at NP\_062807.2

107352.3

XM\_003946074.1 XP\_001472954.2, XP\_003946123.1

1416864\_at NP\_033324.1

1421528\_a\_at NP\_035643.1, NP\_001029080.1

1422613\_a\_at NP\_038749.1

NP\_038705.2

1433609\_s\_at NP\_038706.1

1416213\_x\_at, 14 NP\_035642.1

NP\_941030.2

NP\_001001322.1

1424690\_at, 1424 NP\_001230168.1, NP\_001230169.1, NP\_084138.1

1421272\_at, 1435 NP\_033526.1

1423199\_at NP\_001107045.1, NP\_075825.3, NP\_001107046.1

1416581\_at NP\_543124.1

1425762\_a\_at, 14 NP\_035435.1

1416740\_at, 1416 NP\_056549.2

1428705\_at NP\_081316.1

1420845\_at, 1420 NP\_536700.3, NP\_001159503.2

1426148\_at NP\_631936.2

^\_001145834.1, N^ NP\_033084.2, NP\_001139306.1, NP\_001139307.1, NP\_001139308.1

1422043\_at NP\_075025.2

1434320\_at NP\_766565.2, NP\_001159505.1

1434182\_at NP\_001028466.2

1418811\_at, 1418 NP\_062319.1, NP\_001157658.1

, NM\_001166705.1 NP\_001078983.1, NP\_001160177.1

1420754\_at, 1426 NP\_033468.2

1432033\_at NP\_598007.1, NP\_598008.1

1432462\_a\_at NP\_081172.2

1432448\_at

1435345\_at NP\_997181.1

1426040\_a\_at, 14 NP\_038643.1, NP\_001106684.1, NP\_001106685.1, NP\_001171130.1, NP\_001171132

1426344\_at NP\_083199.1

1427888\_a\_at, 14 NP\_001070022.1, NP\_001171138.1, NP\_001171139.1

1429174\_at NP\_001008498.2

1421819\_a\_at, 14 NP\_076360.1, NP\_001191804.1

1434525\_at NP\_722500.1

1434694\_at NP\_808393.1

1428394\_at NP\_001239497.1, NP\_001239499.1, NP\_758471.1, NP\_001239500.1  
 1424366\_at NP\_808316.1  
 1427047\_at NP\_938046.2  
 1417008\_at NP\_031786.2  
 NP\_620087.3  
 1419066\_at NP\_084520.3  
 l\_003084492.1 XP\_996572.1, XP\_003084540.1

XM\_003946075.1 XP\_003945381.1, XP\_003946124.1  
 1417819\_at, 1417 NP\_598434.2  
 1426515\_a\_at NP\_659133.1  
 1423789\_at NP\_659134.1  
 1426983\_at NP\_001033789.1, NP\_001171119.1, NP\_062279.1, NP\_001171120.1, NP\_001171121

1434086\_at NP\_848875.2  
 1434887\_at NP\_062655.1  
 XM\_003086216.2 XP\_003084534.2, XP\_003086264.2  
 1416239\_at NP\_031520.1  
 1433679\_at NP\_001028561.2  
 1426630\_at NP\_659135.1  
 1423999\_at NP\_033724.2, NP\_001106174.1  
 1433657\_at NP\_780720.1  
 1433624\_at, 1433 NP\_766249.2, NP\_001153106.1  
 1427754\_a\_at NP\_034195.2  
 , NM\_001252536.1 NP\_001239463.1, NP\_001239465.1, NP\_082688.1, NP\_001239466.1, NP\_001239467  
 1423947\_at NP\_932118.1  
 1427747\_a\_at NP\_032517.1  
 1426893\_at, 1426 NP\_705788.1  
 1418074\_at, 1418 NP\_035503.1  
 1423115\_at NP\_001020482.1, NP\_058669.1, NP\_001020481.1  
 1417271\_a\_at, 14 NP\_031958.2, NP\_001139820.1, NP\_001139822.1  
 NP\_034366.2  
 1417269\_at NP\_570930.1

1415886\_at NP\_001239476.1, NP\_038809.1  
 1423783\_at NP\_690013.1  
 NP\_796358.2  
 1420505\_a\_at, 14 NP\_033321.2, NP\_001107041.1  
 1426812\_a\_at NP\_666231.1  
 1429176\_at NP\_955006.1  
 1416026\_a\_at, 14 NP\_033102.2

NP\_062361.1  
 1433553\_at NP\_849219.2  
 1436085\_at NP\_001078976.1

1431127\_at, 1435 NP\_001020765.1, NP\_082223.2  
1428121\_at, 1428 NP\_780393.2  
1421193\_a\_at NP\_058048.1  
1423442\_a\_at, 14 NP\_038918.3, NP\_001158240.1, NP\_001158241.1, NP\_001158242.1, NP\_001158244  
1423234\_at NP\_542121.2  
1425746\_at, 1430 NP\_084297.1  
1415686\_at, 1419 NP\_080973.1  
1433558\_at NP\_001001602.2, NP\_001107596.1, NP\_001107597.1  
1430064\_at NP\_084050.1, NP\_083197.2  
1423692\_at NP\_080979.1  
NP\_083585.1  
1420143\_at, 1420 NP\_001094061.1  
NP\_666365.1  
1434629\_at NP\_950190.2  
1424188\_at NP\_666233.2, NP\_001029132.1  
1424625\_a\_at NP\_666234.3  
1423596\_at, 1425 NP\_067619.1, NP\_001153103.1  
1418315\_at, 1421 NP\_620639.1  
1421515\_at, 1421 NP\_034394.1, NP\_001153020.1, NP\_001153021.1  
NP\_766442.1  
1436587\_at NP\_083963.1  
1416243\_a\_at, 14 NP\_079868.1  
1436421\_s\_at NP\_083085.1  
1431120\_a\_at, 14 NP\_084069.1  
1435266\_at NP\_848893.2  
1424346\_at, 1424 NP\_077171.1  
NP\_031422.3  
NP\_766251.3  
1422945\_a\_at NP\_032475.2  
\_033304.2 NP\_796113.1  
1417573\_at NP\_598600.1  
\_040362.1  
1416700\_at, 1416 NP\_083086.1  
1429490\_at, 1429 NP\_780447.4  
1433951\_at NP\_892039.1  
168800.1  
1428928\_at NP\_001032176.1, NP\_666235.1  
1416974\_at, 1416 NP\_062641.1  
1428579\_at NP\_765997.2  
1420916\_at, 1420 NP\_061255.1  
1424020\_at, 1424 NP\_075365.3  
1433422\_at, 1433 NP\_038641.1, NP\_001132981.1  
  
104686.3  
1417434\_at, 1428 NP\_034404.3, NP\_001139292.1  
1428032\_at NP\_001028541.1, NP\_001104500.1  
1416786\_at, 1416 NP\_031420.2, NP\_001103674.1, NP\_001103675.1



^\_026361.2 NP\_780673.2, NP\_080637.1  
NP\_938036.2  
^\_001159636.1 NP\_082394.1, NP\_001153108.1  
1435240\_at NP\_001001182.2  
140519.1  
1420609\_at NP\_065600.1  
1418703\_at, 1434 NP\_064692.2, NP\_001135403.1, NP\_001135404.1  
  
1421640\_a\_at NP\_035659.1, NP\_001157543.1, NP\_001157544.1  
1421751\_a\_at NP\_067501.2  
1416711\_at NP\_033348.2  
^\_027225.1 NP\_795999.2, NP\_081501.1  
1417588\_at, 1417 NP\_056551.2  
1419550\_a\_at, 14 NP\_058562.1  
1434418\_at NP\_766444.1  
1427133\_s\_at NP\_001074557.1  
1429762\_a\_at NP\_082560.1  
1427342\_at NP\_796218.2  
1434475\_at, 1435 NP\_001074555.1  
1425190\_a\_at NP\_082797.1  
1416421\_a\_at, 14 NP\_033304.1, NP\_001103615.1  
NP\_083556.2  
1432524\_at  
1429107\_at NP\_808451.2, NP\_001075017.2  
1424710\_a\_at NP\_081628.3  
NP\_766252.2  
^\_001110512.1 NP\_663499.2, NP\_001103982.1  
1429847\_a\_at, 14 NP\_932122.2, NP\_001159452.1, NP\_001159453.1, NP\_001159454.1  
1415841\_at NP\_034194.1, NP\_001185801.1, NP\_001185802.1, NP\_001185803.1, NP\_001185804  
1428061\_at NP\_080391.2  
NP\_079909.1  
1422444\_at, 1422 NP\_032423.2  
1423747\_a\_at, 14 NP\_766253.2  
1418943\_at, 1425 NP\_001158263.1, NP\_075544.1, NP\_835185.2  
1428069\_at NP\_080142.1  
1431804\_a\_at NP\_001018052.1, NP\_001091895.1  
  
1430053\_a\_at, 14 NP\_080218.1, NP\_084367.1  
NP\_001005343.1  
1423375\_at NP\_080130.2, XP\_003689388.1  
1420545\_a\_at NP\_083992.1, NP\_001106717.2, NP\_786928.2, NP\_001160075.1, NP\_001160076.1  
141997.1  
NP\_778180.1  
1429120\_at NP\_081409.1, NP\_001103679.1  
1421577\_at NP\_031993.1  
1422239\_at NP\_032301.2  
NP\_032300.2

|\_008273.2 NP\_032299.1  
 1418606\_at NP\_038582.2  
 1419126\_at NP\_038583.1  
 1431099\_at, 1433 NP\_032302.2  
 1430263\_at  
 1421537\_at NP\_034598.2  
 NP\_034599.2  
  
 |\_107433.2  
 1420573\_at NP\_034597.2  
 1430500\_s\_at NP\_058084.3  
 ^\_146130.3, NM\_C NP\_932758.1, NP\_666242.2, NP\_444493.1  
 1416543\_at NP\_035032.1  
 |\_104759.1  
 NP\_034119.1  
 NP\_700454.1  
 NP\_663500.2  
 1423613\_at NP\_542125.3  
 1426904\_s\_at, 14 NP\_077143.2  
 NP\_058661.1  
 1418038\_s\_at NP\_077758.1  
  
 1426447\_at NP\_001177108.1, NP\_081367.1  
 1427876\_at, 1427 NP\_081210.2  
 1421198\_at, 1432 NP\_032428.2  
 1426310\_at, 1426 NP\_659136.1  
 1423612\_at NP\_598601.1  
 1434501\_at NP\_001005342.1  
  
 |\_104776.1  
 1417499\_at NP\_038927.2  
 , NM\_024497.1, NI NP\_001077278.1, NP\_078773.1, NP\_001074818.2  
 NP\_954693.1  
 1425093\_at NP\_663501.2  
 1431321\_at  
 1426788\_a\_at, 14 NP\_892035.2, NP\_001129553.1  
 1427051\_at NP\_001074729.1  
 1417050\_at NP\_080437.2  
 1423737\_at NP\_080964.1  
 1417922\_at NP\_080267.1  
 1426581\_at NP\_079852.1  
 1423932\_at, 1425 NP\_001231820.1, NP\_059064.2, NP\_941955.1, NP\_001231832.1  
 1423926\_at NP\_080997.1  
 1425735\_at NP\_001171190.1, NP\_001171191.1, NP\_663502.3  
 , NM\_013839.4 NP\_001171201.1, NP\_038867.2  
 1426288\_at NP\_766256.3, NP\_001139329.1

I\_915939.2 XP\_889417.2, XP\_921032.2  
1423793\_at, 1423 NP\_663503.1  
NP\_848839.2  
, NM\_172669.3 NP\_001074223.1, NP\_766257.3  
NP\_031725.1  
1416006\_at NP\_001012336.1, NP\_001012335.1, NP\_034914.1  
1426738\_at NP\_612179.2, NP\_001160069.1  
1419295\_at NP\_036087.2  
1418390\_at, 1418 NP\_620094.2, NP\_001103160.1, NP\_001103161.1  
1434007\_at NP\_766258.2, NP\_001160105.1  
1425021\_a\_at, 14 NP\_660104.2  
1426383\_at NP\_034093.1, NP\_001106804.1

A\_145832.3 NP\_997597.1, NP\_665831.1  
NP\_001020417.1  
1429856\_at NP\_899003.1  
NP\_001138506.1  
1428862\_at NP\_898929.2

1415813\_at NP\_031492.2  
1421376\_at, 1421 NP\_033450.2  
1421869\_at, 1421 NP\_064663.2  
1422733\_at NP\_034348.2  
1433453\_a\_at, 14 NP\_849221.2  
1433692\_at NP\_694766.1  
1416462\_at, 1416 NP\_058019.2, NP\_001104759.1, NP\_001104760.1, NP\_001104761.1, NP\_001104762

1435848\_at NP\_001028519.2  
1419191\_at, 1426 NP\_034564.2, NP\_001139296.1  
1424723\_s\_at NP\_796227.1, NP\_001032403.1, NP\_663504.1  
1427151\_at, 1427 NP\_001116799.1  
1428990\_at XP\_003945401.1, XP\_003946135.1  
NP\_663355.1

1425995\_s\_at NP\_659032.3  
1417090\_at NP\_033063.1  
1422168\_a\_at, 14 NP\_001041604.1, NP\_001041607.1, NP\_001041606.1, NP\_031566.4

1433891\_at NP\_766259.2  
NP\_766109.1  
1423210\_a\_at, 14 NP\_079679.1  
1432798\_at NP\_598410.2, NP\_598409.2  
168804.1  
1426495\_at, 1433 NP\_077216.1  
1425357\_a\_at NP\_035954.1  
1417129\_a\_at NP\_034955.1, NP\_001129544.1, NP\_001153039.1, NP\_001153040.1, NP\_001153041  
104703.1

1423160\_at, 1423 NP\_277059.1  
NP\_080896.2  
1421389\_a\_at NP\_001171277.1, NP\_038747.2  
NP\_033299.1  
1416961\_at NP\_033903.2  
, NM\_001145854.1 NP\_001028426.2, NP\_001139326.1  
NP\_001075440.1  
NP\_808236.2  
1426987\_at  
NP\_001001982.2  
1433703\_s\_at NP\_001038988.1  
NP\_955014.2  
1420271\_at, 1429 NP\_775626.1  
1430193\_at NP\_083893.2  
1418281\_at NP\_035364.1  
1428196\_a\_at NP\_001028308.1  
1435750\_at NP\_796131.1  
1420165\_s\_at NP\_631878.2  
NP\_001034312.1  
1417990\_at NP\_082380.1  
1416627\_at NP\_058603.2  
  
1421826\_at, 1421 NP\_062327.2  
1418125\_at NP\_080850.2  
NP\_062743.1  
1428411\_at, 1430989\_a\_at  
XP\_894986.1  
1429047\_at NP\_084388.2  
1424037\_at NP\_666237.1  
^\_206941.1, NM\_2 NP\_032549.2, NP\_996824.1, NP\_976220.2, NP\_996825.2  
1425248\_a\_at, 14 NP\_062265.2  
1431346\_at  
1422646\_at, 1431 NP\_038748.2, NP\_001157746.1  
1425097\_a\_at, 14 NP\_035873.2  
1420896\_at, 1420 NP\_033248.1, NP\_001171263.1, NP\_001171264.1  
1428166\_at NP\_081167.2  
1421485\_at, 1428 NP\_001020027.1, NP\_001020028.1, NP\_542966.2  
1430325\_at  
1420971\_at NP\_033487.2  
1433518\_at NP\_808514.2  
1428198\_at, 1428 NP\_083751.1  
1431259\_at NP\_849220.3  
1429345\_at, 1433 NP\_700436.1  
1425309\_at NP\_694715.2  
1423423\_at NP\_031978.2  
NP\_666085.2  
1423206\_s\_at NP\_035484.1

1420010\_at, 1426 NP\_001020542.1  
1425087\_at NP\_080594.2  
1433779\_at NP\_796028.2, NP\_950239.2, NP\_001192298.1, NP\_001192299.1, NP\_001192300.1  
NP\_032571.2  
1435320\_at NP\_997615.1  
NP\_653128.2  
NP\_663506.2  
1430735\_at NP\_080527.2  
NP\_001092767.1  
1436167\_at NP\_001013851.2  
NP\_001028428.2  
1434046\_at NP\_001004174.1

1418843\_at NP\_035904.2  
1417349\_at, 1417 NP\_062762.1  
^\_199238.2, NM\_1NP\_766125.2, NP\_954708.1, NP\_954709.1, NP\_954710.1, NP\_954711.1  
1419269\_at, 1419 NP\_076084.2, NP\_001153118.1  
1425896\_a\_at NP\_032019.2  
NP\_808276.2  
1423459\_at NP\_034069.2  
NP\_780363.1  
1430919\_at NP\_083731.2  
1424697\_at NP\_081257.1  
1416316\_at NP\_036108.2  
1419761\_a\_at, 14 NP\_034379.1, NP\_997552.1  
1416799\_at, 1416 NP\_067425.2, NP\_001157797.1  
NP\_796188.2  
NP\_079572.2  
1433895\_at, 1433 NP\_780354.1  
XM\_003946099.1 XP\_003945402.1, XP\_003946148.1  
NP\_647469.2  
1418544\_at NP\_062763.2, NP\_001104801.1  
1428704\_at NP\_082417.3, NP\_001104499.1  
1435563\_at NP\_084239.1  
1424046\_at NP\_001106650.1, NP\_033902.2  
NP\_083041.1  
1426334\_a\_at, 14 NP\_997563.1, NP\_997564.1, NP\_033884.1  
1415680\_at, 1417 NP\_032595.2  
1422869\_at NP\_032613.1, XP\_003689391.1  
1429336\_at, 1429 NP\_082524.2  
1418495\_at NP\_065619.2  
XM\_003086259.1 XP\_001004454.1, XP\_003086307.1  
107406.3  
1427112\_at, 1427 NP\_081468.1  
^\_001159593.1 NP\_056562.1, NP\_001153065.1  
1435938\_at NP\_853620.1

1421473\_at NP\_034684.2  
1427124\_at  
1431107\_at NP\_001033724.2, NP\_899085.3  
1419260\_a\_at NP\_033251.1  
1421707\_at NP\_619596.1  
1426533\_at NP\_077155.2

1418885\_a\_at, 14 NP\_570954.1  
1435044\_at NP\_001103983.1  
1425340\_a\_at NP\_033006.2, NP\_001157160.1  
1430249\_at  
1433878\_at NP\_997090.1  
1418598\_at, 1432 NP\_001242922.1, NP\_001242923.1, NP\_542129.2  
1435369\_at NP\_937819.2, NP\_001139556.1  
NP\_922936.3  
1434867\_at NP\_001074631.1

1421166\_at, 1434 NP\_033860.2  
NP\_082582.1  
1419742\_at NP\_080367.1  
1424817\_at NP\_081917.1  
1426051\_a\_at, 14 NP\_031708.2  
1421963\_a\_at NP\_001104545.1, NP\_075606.1  
1431948\_a\_at NP\_705721.2  
1436101\_at NP\_848722.1  
1424268\_at NP\_001171304.1, NP\_001171305.1, NP\_663508.1, NP\_001171306.1, NP\_001171307  
1416130\_at NP\_035300.1  
1428392\_at NP\_780654.1  
1417329\_at, 1417 NP\_061294.2  
1417947\_at NP\_035175.1  
1418794\_at, 1418 NP\_619592.1  
1429144\_at, 1429 NP\_083078.3, NP\_001036136.1, NP\_001036137.1  
1428754\_at, 1431 NP\_780322.2  
1429557\_at NP\_079952.2  
1435648\_at NP\_796277.2  
1423635\_at NP\_031579.2  
1421170\_a\_at, 14 NP\_062651.2, NP\_001139302.1  
1421105\_at, 1421 NP\_038850.1  
NP\_001119962.1  
NP\_033881.2  
1417124\_at NP\_062745.1  
1426123\_a\_at, 14 NP\_077243.2, NP\_598329.1  
1417646\_a\_at, 14 NP\_001186117.1, NP\_077187.1

1429619\_a\_at, 14 NP\_083260.1  
1416059\_at NP\_001239472.1, NP\_001239473.1, NP\_062761.2, NP\_001239474.1

NP\_001028469.1  
NP\_079590.1  
1418244\_at NP\_080701.1, NP\_001135437.1  
1420849\_at, 1420 NP\_080096.1  
NP\_780489.2  
1421399\_at NP\_058585.2  
1422842\_at, 1422 NP\_036047.2  
1422833\_at NP\_034576.2  
1422281\_at NP\_033245.2  
NP\_033404.1  
1422488\_at NP\_062735.4, NP\_001103629.1  
1428348\_at NP\_083262.1  
1426195\_a\_at NP\_034106.2  
NP\_001078990.1  
NP\_082253.1  
1416617\_at NP\_542142.1  
  
1433504\_at NP\_722476.1  
NP\_997087.2  
1416036\_at NP\_032045.1  
1424369\_at, 1424 NP\_997611.1  
1430925\_at, 1432365\_a\_at  
NP\_001153882.1  
1419942\_at, 1425 NP\_083964.2  
1419034\_at, 1419 NP\_031814.2  
1426644\_at NP\_077158.1  
1415792\_at NP\_062679.2, NP\_001077390.1  
1426065\_a\_at NP\_780302.2  
NP\_035568.1  
1428401\_at, 1428 NP\_780335.1  
NP\_808324.1  
NP\_001034211.1  
NP\_033073.1  
1417287\_at, 1428 NP\_034506.1, NP\_001153023.1, NP\_001153024.1, NP\_001153025.1  
1425895\_a\_at NP\_034625.1  
1420887\_a\_at, 14 NP\_033873.3  
1428104\_at, 1428 NP\_001135447.1, NP\_001135448.1, NP\_001135449.1, NP\_001135450.1, NP\_082385  
1427556\_at NP\_001074513.2  
NP\_034356.1  
1426189\_at, 1435 NP\_665687.1, NP\_001152848.1  
1430864\_at, 1430 NP\_001077087.1, NP\_083340.2  
1419933\_at, 1419 NP\_849270.1  
NP\_001011732.1  
1420986\_s\_at, 14 NP\_032470.3  
1430305\_at  
1434561\_at, 1435 NP\_001035028.1  
1428284\_at, 1428 NP\_001127772.1, NP\_001001986.2

XM\_003946104.1 XP\_003945406.1, XP\_003946153.1  
1418351\_a\_at NP\_001003961.2, NP\_001003960.2, NP\_034198.3, NP\_001003963.2, NP\_001116469  
1416825\_at NP\_033254.2  
1434757\_at NP\_766448.1, NP\_033953.1  
1431946\_a\_at NP\_067521.2  
1417878\_at, 1431 NP\_031917.1  
1422780\_at NP\_067509.1  
1434234\_at NP\_955008.2  
1426240\_at NP\_083638.1  
1418573\_a\_at, 14 NP\_075619.2, NP\_001132983.1, NP\_001132984.1, NP\_001132985.1  
NP\_080306.1  
1415769\_at, 1431 NP\_001230641.1, NP\_032421.2  
NP\_835212.1  
1423374\_at NP\_001229487.1, NP\_062799.2  
NP\_001163452.1 NP\_062802.2, NP\_001156924.1  
1423695\_at NP\_663512.2  
1417678\_at NP\_034938.3  
1428442\_at  
1427578\_a\_at, 14 NP\_034709.1  
NP\_082064.2  
1421512\_at NP\_032409.3, NP\_796191.2, NP\_001123472.1, NP\_001123471.1  
NP\_631890.3  
1433439\_at NP\_733467.1, NP\_733469.1  
1416928\_at, 1416 NP\_083673.3, NP\_733486.2  
1416373\_at, 1431 NP\_035041.2  
1420642\_a\_at NP\_001157688.1, NP\_001157689.1, NP\_080222.1  
1420982\_at, 1426 NP\_573505.2  
XM\_003945359.1 XP\_003946155.1, XP\_003945408.1  
1426961\_at, 1426 NP\_766262.2  
NP\_064651.2  
1425047\_a\_at, 14 NP\_081861.2  
  
1421090\_at, 1434 NP\_038538.1, NP\_001006665.1, NP\_001003815.1  
  
1426465\_at NP\_001035952.1, NP\_001035953.1, NP\_666240.4  
  
107458.1, XR\_107460.1, XR\_104747.1, XR\_104746.1, XR\_104748.1  
1431115\_at, 1434 NP\_775572.1  
1430366\_at, 1431272\_at  
1429423\_at  
1416699\_at NP\_080400.1  
NP\_084259.1  
1417139\_at NP\_080129.2  
1436132\_at NP\_001158135.1  
NP\_001170910.1  
1418131\_at, 1420 NP\_061339.3, NP\_001132992.1



1424156\_at, 1425 NP\_035379.2, NP\_001132988.1  
NP\_001034646.2  
1418896\_a\_at NP\_062616.2  
1424061\_at NP\_081244.2  
1420631\_a\_at NP\_058612.3  
1423506\_a\_at NP\_035053.1, NP\_851291.1  
1434574\_at  
1434656\_at NP\_808326.2  
1425414\_at NP\_694729.1, NP\_001153134.1  
NP\_082251.2  
NP\_034788.1  
1423474\_at NP\_033434.2  
1435149\_at NP\_067255.2  
1419791\_at NP\_796237.2  
, NM\_022883.3 NP\_001186047.1, NP\_075021.1  
NP\_878260.1  
1416720\_at, 1416 NP\_080775.3  
1418739\_at NP\_038759.1  
1434696\_at NP\_742162.2  
1417656\_at NP\_032678.1  
1416856\_at NP\_079975.2  
NP\_775573.1  
1430525\_at  
1417815\_a\_at, 14 NP\_036162.3  
1430761\_at  
1420878\_a\_at, 14 NP\_061223.2  
NP\_080272.1  
1421107\_at, 1434 NP\_067395.1  
1421518\_at NP\_032461.2  
1425418\_at NP\_663344.2  
1417654\_at NP\_035651.1  
1420958\_at NP\_079851.2  
1430106\_at  
1419903\_at, 1419 NP\_001041692.1, NP\_081073.1, NP\_001041693.1, NP\_001041694.1  
1428740\_a\_at NP\_598540.2  
1430224\_at NP\_082237.1  
XM\_003946102.1 XP\_003945395.1, XP\_003946151.1  
1417666\_at NP\_598524.1  
1417464\_at NP\_033420.1  
1427070\_at NP\_598685.2  
1417449\_at NP\_573503.2  
NP\_082304.1  
1432498\_at NP\_083646.1  
1429141\_at NP\_001076443.1  
, NM\_008906.3 NP\_001033581.1, NP\_032932.2  
1417963\_at NP\_035255.1  
NP\_666241.1

NP\_950192.2  
 104757.1  
 1425337\_at NP\_065066.2  
 1424055\_at NP\_659141.1  
 1420054\_s\_at NP\_001239502.1, NP\_001239503.1, NP\_659142.1, NP\_001239504.1  
 1436011\_at NP\_525026.2, NP\_997588.1, NP\_997589.1  
 1416560\_at NP\_473396.1  
 1422737\_at NP\_032705.2  
 1430388\_a\_at NP\_001239507.1, NP\_001239508.1, NP\_082348.2  
 1434069\_at NP\_808450.2  
 1419683\_at NP\_076304.2  
 1436192\_at NP\_001078964.1  
 NP\_076054.1  
 1422766\_at, 1435 NP\_035620.1, NP\_001103375.1, NP\_001103376.1  
 1424161\_at, 1425 NP\_694705.2  
 1427091\_at NP\_001028368.2  
 NP\_001074474.1  
  
 1423179\_at, 1423 NP\_032446.2  
 NP\_032994.1  
 1434107\_at NP\_739562.1  
 1422959\_s\_at, 14 NP\_109668.2  
 NP\_035557.1  
 1415755\_a\_at NP\_075719.1  
 1424411\_at, 1427 NP\_663513.1  
 1418901\_at, 1427 NP\_034013.1  
  
 1417068\_a\_at NP\_035331.3  
 1423174\_a\_at, 14 NP\_067384.2  
 1423069\_at NP\_033758.2  
 1419353\_at NP\_034202.1  
 1428924\_at NP\_001153802.1  
 1421030\_at NP\_033590.2  
 1428026\_at, 1435 NP\_536703.2  
 , NM\_001013369.1, NP\_001103622.1, NP\_001013387.1, NP\_001186831.1  
  
 1433607\_at NP\_783439.1  
 1424694\_at, 1424 NP\_080188.3  
 1418910\_at, 1432 NP\_031583.2  
 1417021\_a\_at NP\_001077429.1, NP\_036176.1, NP\_001077428.1  
 1429528\_at NP\_780321.1  
 1421265\_a\_at NP\_062420.2  
 1424503\_at, 1424 NP\_077756.2  
 1423152\_at, 1436 NP\_062780.2  
 1429237\_at NP\_766263.2, NP\_001095893.1, NP\_001095894.1, NP\_001095895.1  
 1421740\_at, 1427 NP\_062664.2, NP\_068840.2, NP\_001070975.1, NP\_963912.1, NP\_963911.1, NP\_034  
 1417868\_a\_at, 14 NP\_071720.1

NP\_796165.2  
NP\_001078970.1  
NP\_001074758.1  
1427460\_at NP\_001074561.1  
1429880\_at  
NP\_808395.2  
1423567\_a\_at, 14 NP\_036099.1  
NP\_848865.4  
NP\_653083.2  
1419263\_a\_at NP\_062796.2  
1427009\_at, 1427 NP\_001074640.1  
1428366\_at, 1436 NP\_082755.1  
1422511\_a\_at, 14 NP\_113550.3  
1431258\_at NP\_035935.2, NP\_808520.2, NP\_780760.2  
1428824\_at NP\_083883.1  
1421561\_at NP\_542372.2  
1415767\_at NP\_776122.1  
NP\_001156719.1  
1427245\_at NP\_001171177.1, NP\_001171178.1, NP\_665703.2, NP\_001171179.1, NP\_001171180  
1428381\_a\_at NP\_079874.1  
NP\_033210.1  
1435516\_x\_at NP\_001001882.3, NP\_001160137.1, NP\_001160138.1, NP\_001160139.1, NP\_001160  
1425507\_at, 1425 NP\_083978.3, NP\_001159463.1, NP\_001159464.1, NP\_001159467.1  
1416869\_x\_at NP\_001041613.1, NP\_659143.1  
1429168\_at NP\_081932.1, NP\_082401.1  
NP\_899004.1  
1417106\_at, 1417 NP\_079758.2  
1436179\_a\_at, 14 NP\_058055.1  
1424646\_at NP\_081041.2  
\_027290.1  
1436184\_at NP\_001158069.1  
NP\_033262.2  
1418107\_at NP\_033352.1  
1417786\_a\_at, 14 NP\_080722.1  
NP\_950188.2  
1420711\_a\_at NP\_001156773.1, NP\_001156774.1, NP\_033020.2, NP\_001156777.1, NP\_001156778  
1420858\_at, 1420 NP\_032888.1  
1419493\_a\_at, 14 NP\_001020432.1, NP\_001020433.1, NP\_033438.1, NP\_001020435.1, NP\_001020434  
1436067\_at, 1436 NP\_808328.2  
1423002\_at, 1436 NP\_444412.2, NP\_001181960.1  
1423127\_at, 1430 NP\_061352.2  
NP\_001010834.1  
1418408\_at NP\_079788.2  
^\_001163328.1, NI NP\_848746.1, NP\_001156800.1, NP\_001156801.1, NP\_001156802.1  
1429129\_at, 1435 NP\_083191.2, NP\_001157051.1, NP\_001157052.1  
1417444\_at NP\_031918.2  
1426840\_at, 1426 NP\_766265.3, NP\_001139391.1

1423313\_at, 1423 NP\_032828.2, NP\_001116231.1  
^\_001146323.1, NI NP\_542365.3, NP\_001139795.1, NP\_001139796.1  
NP\_038783.1  
1431220\_at, 1435 XP\_003945717.1  
1422761\_at, 1434 NP\_109657.2  
1419513\_a\_at NP\_001171096.1, NP\_001171097.1, NP\_031926.2

1433833\_at NP\_775274.2  
1429870\_at, 1430 NP\_081186.1, NP\_001156479.1, NP\_001156480.1, NP\_001156481.1  
1434593\_at NP\_808254.1  
1432635\_a\_at, 14 NP\_081292.1  
, NM\_001134386.1 NP\_001127857.1, NP\_001127858.1, NP\_082241.1  
^\_001165954.1, NI NP\_700470.2, NP\_001159426.1, NP\_001159427.1, NP\_001159428.1  
1417410\_s\_at NP\_032883.2  
1422054\_a\_at NP\_035516.2, NP\_001034179.1  
1424237\_at NP\_653102.1, NP\_001155290.1  
1426773\_at NP\_077162.2  
1416569\_at, 1429 NP\_062647.2  
NP\_001013042.1  
1426544\_a\_at, 14 NP\_080254.2, NP\_081895.2

1416967\_at NP\_035573.3  
1417227\_at NP\_076133.3

NP\_848505.2  
1429581\_at NP\_766266.3  
1418462\_at NP\_062266.1  
1417910\_at, 1417 NP\_033958.2  
1430941\_at NP\_082086.2  
1424510\_at NP\_705789.1  
1417254\_at NP\_067318.2, NP\_001156983.1  
1415874\_at NP\_036026.1  
1435880\_at NP\_001161355.1  
NP\_899044.3  
1418253\_a\_at NP\_035150.3  
1419838\_s\_at, 14 NP\_035625.2, NP\_775261.2  
NP\_001035489.1  
1428714\_at NP\_081834.1  
1426752\_at, 1426 NP\_758507.3, NP\_001123656.1, NP\_001123657.1, NP\_001123658.1  
1425837\_a\_at NP\_033964.1  
1418275\_a\_at, 14 NP\_075991.1  
1431051\_at XP\_003945413.1, XP\_003946159.1  
1416285\_at NP\_079799.1  
1418022\_at, 1418 NP\_444319.3  
1423003\_at, 1435 NP\_542983.3  
1429955\_at  
NP\_001004176.2

1416981\_at, 1416 NP\_062713.2  
1433776\_at NP\_780595.1  
NP\_766089.1  
1427397\_at, 1429 NP\_775558.2  
NP\_766450.2  
1418899\_at, 1418 NP\_080711.1  
1420115\_at, 1428 NP\_001157042.1, NP\_081424.3  
1424160\_at, 1430 NP\_079718.1  
NP\_031654.2  
  
NP\_085098.1  
1421369\_a\_at, 14 NP\_034880.1  
1417817\_a\_at, 14 NP\_598545.2, NP\_001161753.1  
1418209\_a\_at, 14 NP\_062283.1  
1430535\_at NP\_001074698.1  
1415827\_a\_at, 14 NP\_109610.1  
1434452\_x\_at NP\_001005509.1  
1430988\_at NP\_001035486.2  
NP\_033200.2  
  
NP\_808523.2  
1416904\_at NP\_064391.2, NP\_001240637.1, NP\_001240638.1, NP\_001240639.1, NP\_001240640  
1421456\_at NP\_032798.1  
1417914\_at, 1417 NP\_082988.1  
1429185\_at NP\_001074764.1  
1422975\_at NP\_032630.2  
NP\_808524.1  
1433567\_at, 1435 NP\_001028472.2  
1415700\_a\_at NP\_080431.1  
  
1426721\_s\_at NP\_849223.2  
, NM\_001037923.4 NP\_001160131.1, NP\_001033012.2  
1423622\_a\_at NP\_064321.2  
NP\_001158235.1  
1423025\_a\_at NP\_001106890.1  
, NM\_001113421.1 NP\_001106891.1, NP\_001106892.1, NP\_038956.2  
NP\_001161468.1  
1427568\_a\_at, 14 NP\_080917.1  
1427275\_at, 1427 NP\_598547.1  
  
1416118\_at, 1431 NP\_080139.3  
1417974\_at, 1417 NP\_032493.1  
NP\_001229929.1  
1435699\_at, 1435 NP\_848841.2  
NP\_598548.1  
1428875\_at NP\_780402.1

NP\_001156471.1  
1432112\_at  
NP\_080628.1  
1419123\_a\_at NP\_064355.1  
NP\_033170.1  
1426834\_s\_at NP\_766269.3  
, NM\_001205355.1 NP\_001028473.2, NP\_001192284.1  
NP\_001074562.1  
1424986\_s\_at NP\_001171244.1, NP\_001171245.1, NP\_536353.2  
1422475\_a\_at NP\_058655.3

1425717\_at, 1436 NP\_001071155.1, NP\_001071156.1, NP\_109620.2  
1428222\_at NP\_001182425.1, NP\_001182426.1, NP\_081815.3, NP\_001182427.1, NP\_001182428  
1418635\_at, 1418 NP\_001076787.1, NP\_036181.3  
1434926\_at NP\_001003912.1  
NP\_291051.1  
1415888\_at, 1419 NP\_032257.3  
1428709\_a\_at NP\_080867.2  
1433961\_at NP\_705790.3  
1433960\_at NP\_808331.1  
1418289\_at NP\_057910.3  
1416718\_at NP\_031555.2, NP\_001103228.1  
1420962\_at, 1420 NP\_071314.1  
1435119\_at  
1419205\_x\_at, 14 NP\_079939.3, NP\_001104279.1  
1415727\_at NP\_659146.1  
NP\_766114.1  
1434850\_at NP\_001028656.1  
104842.1  
1421388\_at, 1434 NP\_598426.1

1416707\_a\_at NP\_080204.1  
1433448\_at NP\_848811.2, NP\_001139348.1, NP\_001139349.1  
1421654\_a\_at, 14 NP\_062263.1, NP\_001104572.1, NP\_001002011.2  
1436018\_at NP\_001025061.2

1417738\_at NP\_058595.2  
1422797\_at, 1435 NP\_112538.1  
NP\_277068.1  
1421042\_at, 1421 NP\_032513.3, NP\_001185840.1, NP\_001185841.1, NP\_001185842.1  
1426365\_at, 1430 NP\_083090.2  
NP\_001164533.1 NP\_075370.2, NP\_001158005.1  
1420985\_at NP\_619620.3  
1431137\_at, 1434 NP\_001077276.1, NP\_082464.2, NP\_001077277.1  
1423418\_at NP\_001240680.1, NP\_608219.1  
1417743\_at NP\_031738.2, NP\_001156904.1

1416294\_at NP\_036016.2  
NP\_001014995.1  
, NM\_008094.4 NP\_001070879.1, NP\_032120.1  
1418521\_a\_at, 14 NP\_038632.2, NP\_001155296.1  
1416623\_at NP\_038719.2  
NP\_081043.1  
NP\_033083.2  
1416895\_at NP\_034237.3, NP\_001155897.1  
1431170\_at NP\_034238.1

1421784\_a\_at NP\_031936.2  
168818.1  
1416080\_at, 1425 NP\_001032811.2, NP\_033744.1  
1420663\_at NP\_033591.2  
\_040404.1  
NP\_065263.1  
1422853\_at, 1422 NP\_035498.2, NP\_001106802.1  
1428249\_at NP\_081145.1  
NP\_666243.1  
1421632\_at NP\_536714.2  
1425405\_a\_at, 14 NP\_001139768.1, NP\_062629.3, NP\_001033676.2  
1420744\_at, 1436 NP\_033732.2  
1429311\_at, 1434 NP\_081591.3  
NP\_766118.3  
1422270\_a\_at NP\_034689.2  
1434026\_at NP\_001074651.2

1427260\_a\_at, 14 NP\_001240667.1, NP\_001240669.1, NP\_071709.2  
1424660\_s\_at, 14 NP\_083157.1  
1427014\_at NP\_958809.3  
1427180\_at NP\_036118.2  
1423921\_at, 1423 NP\_663515.2, NP\_849207.2  
NP\_032753.5  
1417948\_s\_at, 14 NP\_080650.1  
1415756\_a\_at, 14 NP\_598615.1  
1423408\_a\_at, 14 NP\_075704.2  
1417421\_at, 1419 NP\_035439.1  
1418704\_at NP\_033139.2  
NP\_001129589.1  
1425792\_a\_at, 14 NP\_035411.2  
1430037\_at, 1433 NP\_083997.1, NP\_001075953.1  
1434650\_at NP\_766271.2, NP\_001159420.1  
NP\_032971.2  
NP\_780565.2  
1418144\_a\_at, 14 NP\_032873.2  
1418284\_at NP\_033362.2  
1423454\_a\_at NP\_035481.1

^\_029885.1 NP\_766100.1, NP\_084161.1  
1416313\_at, 1416 NP\_064298.1  
1428131\_a\_at, 14 NP\_001033797.1, NP\_765983.1  
NP\_001020012.1  
1431554\_a\_at NP\_076117.2, NP\_001078852.1  
1433157\_at  
1423955\_a\_at NP\_084065.1  
1416670\_at NP\_061365.3, NP\_001157113.1, NP\_001157114.1  
  
1419996\_s\_at, 14 NP\_001032826.1, NP\_033839.2  
1416880\_at, 1416 NP\_032588.1  
1420592\_a\_at NP\_075699.3, NP\_001240686.1, NP\_001240687.1  
  
1417128\_at NP\_075809.1  
1418143\_at NP\_038869.1  
1428953\_at, 1429 NP\_001020785.1, NP\_001020784.1  
NP\_835585.3  
NP\_783593.1  
NP\_835586.2  
  
1415996\_at, 1415 NP\_001009935.1, NP\_076208.2  
1433812\_at NP\_001156642.1  
1418119\_at, 1418 NP\_080151.2, NP\_001095877.1  
1420460\_a\_at NP\_035199.3, NP\_001155859.1, NP\_001155860.1  
NP\_001074522.1  
NP\_001074608.1  
1421646\_a\_at NP\_666247.1, NP\_061282.2, NP\_001159421.1  
^\_001162925.1 NP\_084370.1, NP\_001156397.1  
NP\_083201.1  
1423615\_at NP\_080682.3  
1424696\_at NP\_080505.1  
NP\_062774.2  
NP\_080815.1  
1417626\_at, 1433 NP\_796119.1, NP\_835181.2, NP\_001034465.2, NP\_001103633.1  
1415766\_at NP\_035472.1  
NP\_035058.2  
1429101\_at NP\_766451.3  
1429279\_at, 1435 NP\_081738.2  
1433746\_at NP\_780761.1  
1424057\_at NP\_034399.1  
1429682\_at NP\_001136424.1  
168646.1, XR\_168819.1  
1420976\_at, 1420 NP\_034893.1  
1421319\_at, 1434 NP\_035327.2  
1423653\_at, 1435 NP\_659149.1  
NP\_001034460.2  
1427234\_at NP\_808213.2, NP\_001159423.1



1422296\_at, 1422 NP\_079955.1  
1434722\_at NP\_001028475.2  
1426954\_at NP\_444400.2, NP\_001073299.1  
1421298\_a\_at, 14 NP\_034562.2  
, NM\_133865.2 NP\_001020483.1, NP\_598626.2  
  
1416631\_at, 1421 NP\_080469.2, NP\_001157024.1, NP\_001157025.1  
1417995\_at NP\_033005.1  
1435174\_at NP\_766272.2  
  
^\_001163467.1, NI NP\_038657.2, NP\_001156939.1, NP\_001156940.1, NP\_001156941.1  
1421035\_a\_at, 14 NP\_001152826.1, NP\_598614.1  
NP\_001020238.1  
1415802\_at NP\_033222.1  
NP\_082258.2  
1435394\_s\_at NP\_031510.2  
1416380\_at NP\_032645.2, NP\_001156912.1, NP\_001156913.1  
NP\_033927.2  
1427916\_at NP\_001240631.1, NP\_001240632.1, NP\_694731.1  
1421465\_at NP\_033546.2  
  
1426070\_a\_at, 14 NP\_064315.1, NP\_001034436.1  
1416751\_a\_at NP\_059093.3  
1416471\_at NP\_598630.2  
1424782\_at NP\_080289.1, NP\_001020753.1  
1423018\_at NP\_032444.2  
  
1415759\_a\_at, 14 NP\_081050.2  
1425089\_at, 1425 NP\_666034.1  
1436137\_at NP\_758475.1  
NP\_705791.2  
1425154\_a\_at, 14 NP\_031804.3, NP\_001107001.1, NP\_001107002.1  
1426757\_at NP\_083055.1  
1422907\_at NP\_032167.1  
1428962\_at NP\_083590.1  
  
1429042\_at NP\_080474.2  
NP\_079720.1  
1434558\_at NP\_852065.2  
1425200\_at, 1436 NP\_001171241.1, NP\_001171242.1, NP\_663518.1  
1416653\_at, 1435 NP\_035634.1  
1428674\_at NP\_080121.1  
XM\_003945375.1 XP\_003946171.1, XP\_003945424.1  
1430722\_at NP\_001072114.1, NP\_079999.2  
1434828\_at NP\_001157039.1  
1417122\_at, 1417 NP\_666251.1, NP\_065251.2  
1425059\_at, 1434 NP\_849222.3

1435717\_at NP\_075703.1  
1422538\_at, 1422 NP\_067363.3, NP\_001156986.1, NP\_001156987.1  
1423171\_at NP\_071872.1  
, NM\_001173553.1 NP\_001074287.1, NP\_001167024.1  
NP\_084292.1  
NP\_082625.2  
1423195\_at NP\_032272.2  
1424579\_at, 1424 NP\_659151.1  
1426724\_at NP\_082320.1  
1417408\_at NP\_034301.3  
1416679\_at NP\_033017.2  
NP\_766113.1  
1418627\_at NP\_032155.1  
1427881\_at, 1427 NP\_722501.1  
  
1434339\_at NP\_694758.2, NP\_001108137.1  
NP\_700471.2  
NP\_598618.1  
1420388\_at NP\_032965.1  
NP\_666252.1  
1422659\_at, 1427 NP\_076302.1, NP\_001020609.1, NP\_001020610.1  
1428310\_at, 1429 NP\_613059.2  
  
NP\_932114.2  
1426234\_s\_at NP\_666076.2  
1424797\_a\_at NP\_035228.2, NP\_001035967.1, NP\_001035969.1  
1417403\_at, 1417 NP\_569717.1  
NP\_033128.1  
1418305\_s\_at NP\_080854.1  
1418724\_at NP\_031712.2  
^\_001005859.2 NP\_081000.1, NP\_001005859.1  
1421299\_a\_at NP\_034833.2  
NP\_032238.2  
1420512\_at NP\_064661.2  
1416486\_at NP\_031952.2  
1431243\_at NP\_001156927.1, NP\_766620.1  
1429395\_at NP\_080507.2  
1428985\_at NP\_082203.1  
1435005\_at NP\_776123.3  
1431401\_at  
1423112\_at, 1423 NP\_079632.1  
NP\_081564.3  
1427705\_a\_at NP\_032715.2

1426401\_at NP\_032939.1  
 XP\_003945426.1  
 1416415\_a\_at NP\_058030.1  
 1430561\_at NP\_001028327.1  
 1426835\_at, 1426 NP\_780433.1  
 1423220\_at NP\_031943.3  
  
 1417179\_at, 1431 NP\_062517.1  
 1425266\_a\_at NP\_001035780.1, NP\_663519.2  
 XM\_003945379.1 XP\_003946174.1, XP\_003945428.1  
 1419592\_at NP\_033498.1  
 NP\_663521.1  
 NP\_848769.2  
 106418.1  
 1420981\_a\_at NP\_034853.1, NP\_001155241.1, NP\_001155242.1  
 NP\_035958.3  
 NP\_444332.1  
 NP\_001074563.1  
 1416039\_x\_at NP\_034646.1  
 106421.1  
 1429298\_at, 1429 NP\_081269.1  
 1418970\_a\_at, 14 NP\_033870.1  
 1419174\_at NP\_079831.1  
 NP\_001159536.1  
 1429662\_at NP\_081893.1  
 NP\_034448.2  
 1428020\_at, 1431 NP\_081647.2, NP\_081608.1  
 1430615\_at NP\_081870.1  
 1431734\_a\_at NP\_081563.2, NP\_080202.1  
 1433482\_a\_at, 14 NP\_476513.2  
 1434404\_at NP\_777357.2, NP\_001155847.1  
 1426709\_a\_at NP\_001070144.1, NP\_001239415.1, NP\_573510.2  
 1434332\_at NP\_940808.2, NP\_001074224.1  
 1435728\_at NP\_001161830.1, NP\_766062.1  
 NP\_034098.1  
 1425251\_at NP\_035326.2  
 1433521\_at, 1435 NP\_001013828.1  
 1427269\_at, 1430 NP\_001087222.1, NP\_001087221.1, NP\_081265.1  
 NP\_077156.2  
 1421935\_at NP\_080423.1  
 1421745\_at NP\_064353.2  
 , NM\_001190323.1 NP\_001177251.1, NP\_001177252.1, NP\_852056.1, NP\_001177253.1  
 NP\_808398.1  
 1423332\_at, 1430 NP\_058087.2, NP\_001091697.1  
 1418621\_at, 1418 NP\_067493.1  
 1420959\_at, 1425 NP\_598484.2, NP\_001171320.1, NP\_075553.2, NP\_001171321.1, NP\_001171322.1, NP\_038554.1

1429451\_at NP\_080281.3  
1423861\_at, 1423 NP\_780384.1  
1429213\_at NP\_001078962.1  
1416926\_at, 1416 NP\_068697.1, NP\_001186034.1  
1422535\_at NP\_001032211.1, NP\_033960.1  
1431096\_at, 1435 NP\_835213.3, NP\_001153067.1  
1434860\_at NP\_001074670.1  
NP\_918944.2  
1434228\_at NP\_001028625.1, NP\_001091700.1, NP\_001091701.1  
  
NP\_080834.3  
1427640\_a\_at NP\_033952.1, NP\_001104496.1, NP\_001104497.1  
1433735\_a\_at, 14 NP\_852066.2  
NP\_038780.3  
1424289\_at, 1424 NP\_666062.3  
1421236\_at NP\_620402.1  
  
1427097\_at, 1427 NP\_796301.2  
  
1427284\_a\_at NP\_056582.1  
NP\_766575.2  
NP\_001074240.1  
1417861\_at, 1428 NP\_058026.2, NP\_001116454.1  
NP\_766576.1  
1427147\_at NP\_955761.2  
1427997\_at, 1435 NP\_081018.1  
1435308\_at NP\_034373.1  
NP\_766453.2  
1427528\_a\_at NP\_034271.3, NP\_001116361.1  
1419988\_at, 1425 NP\_033342.1, NP\_766276.1  
XM\_003946129.1 XP\_003945799.1, XP\_003946178.1  
142072.1  
NP\_001122978.1 NP\_036127.2, NP\_001116450.1  
1417675\_a\_at, 14 NP\_001074861.1  
1431164\_at, 1434 NP\_081767.2  
  
1417723\_at NP\_062532.2  
NP\_808442.2  
1433668\_at NP\_001028397.2  
1419425\_at, 1434 NP\_031752.1  
1416115\_at, 1416 NP\_056639.3, NP\_001153035.1  
1424209\_at NP\_852071.2  
1417538\_at, 1417 NP\_036025.2  
1419574\_at, 1419 NP\_038917.2  
1417754\_at, 1417 NP\_598858.2  
1429115\_at  
1434056\_a\_at, 14 NP\_001028477.1

106444.1  
1416288\_at NP\_001158143.1, NP\_001158144.1, NP\_032324.1

1422442\_at, 1432 NP\_067510.3  
1418014\_a\_at NP\_071641.1

1432270\_a\_at NP\_084090.1  
1419752\_at, 1419 NP\_076228.2  
1429392\_at, 1429 NP\_081169.2  
1431937\_at NP\_077203.2  
1418737\_at NP\_079815.2  
1435417\_at NP\_001078984.1  
1429471\_at NP\_082900.1, NP\_001041470.1, NP\_001240706.1, NP\_001240707.1, NP\_001240709  
1429801\_at, 1436 NP\_001153055.1, NP\_082269.2  
NP\_780347.2  
1427085\_at NP\_081554.2  
1416247\_at NP\_058586.3, NP\_001153037.1  
, NM\_001252622.1 NP\_001017362.1, NP\_001239551.1  
NP\_057867.2  
A\_001163401.1, NP\_034679.1, NP\_001156873.1, NP\_001165525.1  
1423030\_at NP\_033529.3  
1420960\_at NP\_444311.1, NP\_001156705.1  
1417757\_at NP\_001074882.1, NP\_067443.2  
NP\_796169.2  
1426791\_at, 1426 NP\_001032798.1, NP\_951012.2  
A\_001162381.1 NP\_796351.2, NP\_001155853.1  
1427013\_at NP\_647466.2  
1419738\_a\_at, 14 NP\_033442.2  
1436042\_at NP\_035732.2  
1419979\_s\_at, 14 NP\_038525.2  
1419980\_at, 1434 NP\_766280.2  
1434338\_at NP\_766454.1  
NP\_001092784.1

168827.1  
1427191\_at NP\_776149.1  
1435997\_at NP\_001007464.1  
1425196\_a\_at NP\_081147.1  
NP\_780726.1  
NP\_057887.2  
1421062\_s\_at, 14 NP\_001073853.1, NP\_001073854.1, NP\_001073855.1, NP\_058040.2  
A\_001190414.1 NP\_056643.3, NP\_001177343.1  
1428101\_at, 1431 NP\_780410.2, NP\_001034082.1  
1421765\_at NP\_032808.1  
1432886\_at XP\_003945802.1, XP\_003946179.1

1417321\_at NP\_613056.2

1417772\_at NP\_525028.1  
^\_001163283.1, N^NP\_775575.2, NP\_001156755.1, NP\_001156756.1  
035225.1  
1419058\_at, 1435 NP\_073722.1  
1436206\_at NP\_001019313.1  
, NM\_001134646.1 NP\_001093145.1, NP\_001128118.1  
1426494\_at NP\_081542.2  
1431502\_a\_at NP\_079789.1  
NP\_694807.2  
1434153\_at NP\_001028478.1  
NP\_766621.3  
1433663\_s\_at NP\_001028373.2  
NP\_035858.2  
1417082\_at NP\_570959.1  
1417773\_at, 1417 NP\_444409.1  
1430796\_at, 1436 NP\_083353.1  
NP\_941066.3  
NP\_034058.2  
1420893\_a\_at, 14 NP\_033396.1  
1421059\_a\_at, 14 NP\_064382.3  
1417083\_at, 1427 NP\_077133.1  
XM\_003945760.1 XP\_003946180.1, XP\_003945809.1  
1421079\_at, 1421 NP\_056558.1  
1434317\_s\_at NP\_758508.2  
1426649\_at NP\_067411.1  
1423679\_at NP\_080220.2  
  
1429658\_a\_at, 14 NP\_032043.3  
1421839\_at, 1421 NP\_038482.3  
1423865\_at, 1432 NP\_598652.3, NP\_001153105.1  
^\_001195284.1 NP\_795940.1, NP\_001182213.1  
1425031\_at, 1435 NP\_647470.1  
1419949\_at, 1424 NP\_082329.1  
168659.1  
NP\_766455.2  
1424222\_s\_at NP\_033037.2  
1417394\_at, 1417 NP\_034767.2  
1424142\_at NP\_080355.2  
1436422\_at NP\_001074889.1  
1420929\_at, 1420 NP\_061231.3  
NP\_780727.3  
NP\_035337.2  
1419450\_at XP\_914044.2, XP\_889452.2  
1417143\_at, 1426 NP\_034466.2, NP\_766577.1  
1436185\_at NP\_759013.2  
NP\_001028337.2  
1424083\_at, 1424 NP\_835458.1, NP\_659153.2

1426856\_at, 1426 NP\_077217.2  
1436692\_at NP\_001015681.1, NP\_694798.1  
NP\_766056.1  
1424877\_a\_at NP\_032551.3  
1421015\_s\_at NP\_067473.2  
NP\_808275.1  
1425296\_a\_at, 14 NP\_001075119.1, NP\_062365.2, NP\_599018.3  
1429549\_at NP\_079961.3  
1432555\_at, 1436 NP\_001008791.1, NP\_082916.1, NP\_001008793.1, NP\_001008794.1, NP\_001008795  
1423255\_at, 1423 NP\_077135.1  
1427633\_a\_at, 14 NP\_067337.1  
1433968\_a\_at NP\_766282.1  
1422751\_at, 1434 NP\_035729.3  
1433762\_at  
1424458\_at NP\_001165566.1, NP\_659036.1  
1424886\_at, 1429 NP\_035341.2, NP\_001014310.1  
1428384\_at NP\_081097.2  
1416293\_at, 1427 NP\_032713.3, NP\_001106680.1, NP\_001106681.1  
1428760\_at, 1428 NP\_084225.1  
1417166\_at NP\_598709.1  
1430298\_at NP\_001074481.1  
NP\_766458.3  
^\_175275.3 NP\_796359.1, NP\_780484.2  
1428905\_at NP\_848463.1  
1429665\_at NP\_775576.2  
1434846\_at NP\_001074483.1, NP\_908976.1  
1416141\_a\_at, 14 NP\_033122.1  
1421496\_at NP\_647467.1  
1429225\_at NP\_766014.1, NP\_001103710.1  
1429205\_at, 1431 NP\_084207.2, NP\_081602.3  
1433442\_at NP\_766459.2  
1424425\_a\_at, 14 NP\_077753.1  
^\_001040654.1 NP\_034007.1, NP\_001035744.1  
1421881\_a\_at, 14 NP\_034616.1, NP\_997568.1, NP\_997569.1, NP\_001171354.1  
NP\_081230.1  
1424591\_at NP\_080644.2  
1426019\_at, 1429 NP\_766283.2  
NP\_001074488.1  
NP\_796213.2  
168831.1  
1417409\_at NP\_034721.1  
1421162\_a\_at, 14 NP\_001116424.1, NP\_035035.1, NP\_001116425.1  
1418983\_at, 1418 NP\_001005787.1, NP\_766284.2, NP\_031730.1, NP\_001005784.1  
1423674\_at, 1423 NP\_666256.2  
1434014\_at NP\_778194.3, NP\_001139439.1  
1420665\_at NP\_080624.1  
NP\_663524.1

1429312\_s\_at, 14 NP\_038873.2  
1436030\_at, 1436 NP\_932154.1  
NP\_898845.1  
1433803\_at, 1433 NP\_666257.2

1431215\_at, 1431 NP\_940804.1, NP\_001158055.1, NP\_001158057.1, NP\_001158056.1

1424438\_a\_at NP\_778201.1  
1434793\_at NP\_666366.4  
1433755\_at NP\_001034170.1, NP\_081972.2  
1433595\_at NP\_808400.1  
1429514\_at NP\_542122.1  
NP\_899048.2

1418129\_at, 1418 NP\_444502.2  
1425940\_a\_at, 14 NP\_076161.2, NP\_940840.1  
1418662\_at, 1431 NP\_079893.1  
1432150\_at NP\_083841.4  
1424196\_at NP\_663525.1, NP\_001192085.1

1424173\_at, 1433 NP\_082631.1  
1425423\_at NP\_671754.2  
1421459\_a\_at NP\_001074395.1  
104876.1  
1427647\_at NP\_001161408.1

1435754\_at NP\_001028806.2  
1422663\_at NP\_035145.2  
1433861\_at NP\_796019.1  
NP\_001241659.1  
1415738\_at NP\_079610.1

1416106\_at NP\_083847.1  
1420044\_at, 1423 NP\_001128263.1, NP\_598646.4, NP\_775485.2  
1419251\_at, 1419 NP\_031969.1, NP\_001153436.1  
104877.1  
1416868\_at NP\_031697.1

1418242\_at, 1434 NP\_032009.2  
1428741\_at NP\_001033787.1, NP\_034618.2, NP\_001156869.1, NP\_001156871.1  
1418650\_at, 1418 NP\_080746.3  
NP\_001079018.1  
NP\_032619.1

1422393\_at NP\_056573.1  
1423073\_at NP\_079923.3  
1427707\_a\_at NP\_033211.2  
NP\_035657.1  
1427978\_at, 1427 NP\_766286.2  
1421969\_a\_at, 14 NP\_034303.3  
NP\_079917.1



1427125\_s\_at NP\_705741.2  
 1430613\_at NP\_080823.1  
 1426618\_a\_at NP\_084062.2, NP\_080927.1  
 NP\_808338.2  
 NP\_084144.2  
 1416042\_s\_at, 14 NP\_058057.3, NP\_001074944.1  
 1430123\_a\_at, 14 NP\_067448.1  
 NP\_035164.1  
 1431891\_at NP\_001025083.1  
 1417206\_at NP\_033504.2  
 1423913\_at, 1434 NP\_780453.1  
 1434524\_at NP\_001104747.1, NP\_780344.2  
 1422655\_at NP\_032984.1  
 1429792\_at  
 1436653\_at NP\_778195.1  
 1434496\_at NP\_038835.2  
 NP\_033124.1  
 1432392\_at NP\_608301.3  
 1415717\_at NP\_080015.3  
 1425265\_a\_at, 14 NP\_536717.2  
 1417636\_at, 1431 NP\_032161.2  
 1418080\_at NP\_001240310.1, NP\_059073.1  
 1416769\_s\_at, 14 NP\_291095.1  
 NP\_080620.1  
 1433464\_at NP\_666264.1  
 1421915\_a\_at NP\_033202.3, NP\_001155246.1  
 1435340\_at NP\_759014.2, NP\_001155295.1  
 1420841\_at, 1420 NP\_035343.2  
 1435279\_at NP\_937813.3  
 1431423\_a\_at NP\_064384.2, NP\_776067.1  
 1425676\_a\_at NP\_062295.1, NP\_001034264.1, NP\_001034265.1  
 1416664\_at NP\_075712.2  
 1421461\_at NP\_034953.2, NP\_001116421.1  
 1426599\_a\_at, 14 NP\_035530.2  
 1418909\_at NP\_038876.2  
 1425616\_a\_at NP\_077782.1, NP\_001034087.1  
 NP\_083474.1  
 NP\_001012400.1  
 1421462\_a\_at NP\_062757.2, NP\_062756.2, NP\_001035874.1  
 1425727\_at NP\_001033679.1, NP\_694745.1  
 1418624\_at, 1430 NP\_035862.2  
 NP\_001110129.1, NP\_082953.1, NP\_001103599.1, NP\_001103600.1  
 1430190\_at, 1430 NP\_001257375.1, NP\_082782.1, NP\_083562.1, NP\_001257364.1, NP\_083133.1, NP\_

1417473\_a\_at NP\_080770.2  
NP\_001014900.2  
NP\_001004178.1  
1435362\_at NP\_766287.1  
XM\_003946150.1 XP\_003945435.1, XP\_003946199.1  
NP\_918949.1  
1426241\_a\_at NP\_038911.1, NP\_001153102.1  
1416563\_at NP\_058028.2  
1425400\_a\_at NP\_062509.1  
, NM\_008692.3 NP\_001041633.1, NP\_032718.2  
1428903\_at NP\_082733.1, NP\_001153515.1  
NP\_001005788.2  
NP\_598477.2  
1422087\_at, 1422 NP\_032532.1  
1424489\_a\_at NP\_080149.2  
1428847\_a\_at, 14 NP\_001186065.1, NP\_001186066.1  
NP\_001161390.1  
1416911\_a\_at, 14 NP\_075912.2  
142094.1  
1421165\_at, 1427 NP\_062634.2  
1415749\_a\_at NP\_059503.2  
1422068\_at NP\_035271.1  
1429485\_a\_at NP\_080307.1  
1420779\_at NP\_034343.2  
1423811\_at, 1432 NP\_083433.1  
NP\_032411.3  
1418333\_at, 1428 NP\_032662.3  
NP\_001136199.1  
1434744\_at NP\_705794.2  
NP\_001007574.1  
1428480\_at, 1428 NP\_080836.3  
NP\_808241.2  
1436126\_at NP\_780432.1  
1428133\_at NP\_780455.2  
1418806\_at NP\_001239580.1, NP\_031808.2  
1430100\_at NP\_079820.2  
NP\_766289.2  
1417515\_at NP\_620046.1, NP\_001156738.1  
1429650\_at NP\_083076.3, NP\_001139299.1  
NP\_742157.1  
1428298\_at NP\_001156005.1, NP\_080132.1  
1427408\_a\_at NP\_666265.3  
1424040\_at NP\_659190.3, NP\_001139442.1  
1416771\_at NP\_038746.1  
1434667\_at NP\_955767.1  
1427449\_a\_at NP\_598644.1  
1418484\_at NP\_036032.2

106275.2  
1435904\_at NP\_700451.2  
1434331\_at NP\_700452.2  
, NM\_001145950.1 NP\_001013777.2, NP\_001139422.1  
1435205\_at NP\_945198.2  
1416852\_a\_at, 14 NP\_036116.3  
1426699\_at NP\_598647.1, NP\_001030602.1, NP\_001030603.1  
1423795\_at, 1423 NP\_076092.1  
1436381\_at NP\_941020.1  
NP\_084528.1  
1416048\_at NP\_061244.1, NP\_001182012.1, NP\_001182059.1  
NP\_835211.1  
NP\_766463.1  
106277.1, XR\_141449.1  
1432478\_a\_at, 14 NP\_083495.1  
1433756\_at NP\_083312.1  
NP\_598912.3  
1434892\_x\_at NP\_033056.2  
NP\_080246.1  
1415922\_s\_at, 14 NP\_034937.1  
NP\_032254.1  
1416233\_at NP\_061269.1  
1425054\_a\_at NP\_084024.1  
NP\_001182659.1  
1418590\_at, 1426 NP\_032494.3  
NP\_955009.1  
1418628\_at, 1418 NP\_035447.3  
1420612\_s\_at, 14 NP\_033000.1, NP\_001158217.1  
XM\_003086377.3 XP\_003085477.3, XP\_003086425.3, XP\_003945793.1  
\_040648.1  
1435558\_at NP\_001186625.1, NP\_775094.2  
1427986\_a\_at NP\_082542.3  
1423117\_at NP\_109647.2, NP\_001153075.1, NP\_001153076.1, NP\_001153077.1, NP\_001153078  
1416674\_at NP\_035344.2, NP\_001076588.1  
1417097\_at, 1417 NP\_079573.2  
104887.1  
NP\_001188296.1  
1424092\_at, 1430 NP\_906273.3, NP\_001122079.1, NP\_001122078.1  
XM\_003946152.1 XP\_003945814.1, XP\_003946201.1  
NP\_663368.3  
  
1421003\_at, 1429 NP\_001116464.1, NP\_064669.2  
1416962\_at NP\_001184011.1, NP\_598639.1  
1433789\_at  
  
1432844\_at, 1434 NP\_780515.2, NP\_001155269.1

NP\_080315.1  
1425139\_at NP\_659156.1  
1434198\_at NP\_031538.2  
1431123\_s\_at NP\_765988.2  
1420933\_a\_at, 14 NP\_034296.2, NP\_997592.1, NP\_997596.1  
NP\_958756.1  
1417300\_at NP\_598649.1  
1416433\_at NP\_035414.3  
1425327\_at, 1425 NP\_663528.1, NP\_001157264.1  
1419526\_at NP\_034338.3  
1424956\_at, 1424 NP\_666267.3  
NP\_700472.1  
NP\_057902.5  
NP\_113570.2  
NP\_079943.2  
1419471\_a\_at, 14 NP\_035078.1  
NP\_035980.1  
NP\_766464.1  
NP\_598645.2  
NP\_001145955.1, NP\_848813.3, NP\_001139427.1, NP\_001139428.1  
1417440\_at NP\_001074288.1  
NP\_058653.1  
1422548\_at, 1425 NP\_080420.2  
NP\_001074516.1  
NP\_077177.2  
1435318\_at  
1429843\_at NP\_001092766.1  
1425279\_at NP\_666268.1, NP\_001157266.1  
1415849\_s\_at NP\_062615.1  
1420058\_s\_at, 14 NP\_001243041.1, NP\_084035.1  
1426680\_at NP\_083376.2  
1436193\_at NP\_997120.1  
1424378\_at NP\_663529.2  
1428883\_at, 1428 NP\_079658.2  
NP\_082211.1  
1417001\_a\_at, 14 NP\_076154.3  
1424104\_at NP\_081056.1  
1423392\_at, 1423 NP\_038913.1  
1420934\_a\_at, 14 NP\_058079.2, NP\_001123949.1  
1418526\_at, 1418 NP\_001073856.1, NP\_034308.1  
NP\_034054.3  
1416109\_at NP\_077205.3  
1424639\_a\_at NP\_032280.2  
1424140\_at NP\_848476.1  
1417433\_at NP\_036072.1  
1428675\_at NP\_079687.3  
1422591\_at, 1434 NP\_038764.2

1417615\_a\_at NP\_080195.1  
1416630\_at NP\_032347.1  
1436434\_at NP\_808401.1  
1421169\_at, 1425 NP\_033583.2  
1427129\_a\_at NP\_083147.1  
1416469\_at NP\_077772.2  
NP\_001230191.1  
1425015\_at, 1425 NP\_034272.1  
NP\_937891.1  
NP\_033549.1  
1415724\_a\_at, 14 NP\_001230698.1, NP\_033991.1

1418669\_at, 1418 NP\_032331.2  
1419277\_at, 1419 NP\_570949.2  
1428443\_a\_at NP\_001074624.1, NP\_001243147.1, NP\_083839.1  
1423611\_at NP\_031457.2  
1434177\_at NP\_955011.1  
1426833\_at, 1430 NP\_001243124.1, NP\_001243127.1, NP\_766291.2  
1415751\_at NP\_034600.2, NP\_001116368.1, NP\_001116369.1  
NP\_081156.2  
1435063\_at NP\_001075141.1  
NP\_079727.1  
1430046\_at NP\_082729.1  
1424794\_at NP\_080062.4  
1431810\_a\_at NP\_084133.1  
NP\_032701.2  
1433616\_a\_at, 14 NP\_001156478.1  
1417259\_a\_at, 14 NP\_001032850.1, NP\_033928.1  
1425632\_a\_at NP\_663359.2  
1417294\_at NP\_079613.3  
1426597\_s\_at, 14 NP\_898971.1, NP\_001192102.1  
1427338\_at NP\_742120.2, NP\_001139430.1  
1418961\_at, 1418 NP\_079659.1  
NP\_808535.1  
1434482\_at NP\_001020779.1, NP\_778161.1  
1427071\_at, 1435 NP\_766106.2  
1421151\_a\_at NP\_034269.2  
NP\_001028546.1  
1416224\_at NP\_033567.2  
1420397\_a\_at NP\_062737.2

1418569\_at NP\_598515.3, NP\_001156728.1  
NP\_666099.2  
NP\_001013802.1  
NP\_001028322.1  
1429093\_at, 1429 NP\_001017966.1

1434781\_at, 1436 NP\_758841.1  
1426125\_a\_at NP\_056548.2  
1431339\_a\_at NP\_080270.2  
1424383\_at NP\_663377.1

1431711\_a\_at, 14 NP\_653114.3, NP\_001103154.1, NP\_001103155.1  
1429251\_at NP\_001074824.3, NP\_001243309.1  
NP\_001156455.1  
, NM\_011303.6 NP\_001165895.1, NP\_035433.1  
1436331\_at NP\_001121670.1  
NP\_001077387.1  
1416289\_at NP\_035252.1  
NP\_084117.2  
1422965\_at NP\_033772.2  
1432152\_at NP\_081702.2  
1417592\_at, 1436 NP\_064393.2  
1423587\_a\_at, 14 NP\_057908.2  
1421260\_a\_at NP\_033298.1  
1423723\_s\_at, 14 NP\_663531.1, NP\_001008545.1, NP\_001003899.1, NP\_001008546.1, NP\_001003898  
1419053\_at NP\_062755.1  
, NM\_010044.2 NP\_001020467.1, NP\_034174.2  
NP\_081539.1  
1423706\_a\_at NP\_001074743.1  
1423994\_at, 1423 NP\_032467.2, NP\_997565.2  
1432499\_a\_at NP\_071305.2  
1425773\_s\_at, 14 NP\_597679.1  
1429306\_at, 1429 NP\_081239.1  
1424211\_at NP\_081736.2, XP\_003945754.1  
1420150\_at, 1421 NP\_083311.1  
NP\_775547.2  
NP\_796340.2  
NP\_001078961.1

1416129\_at, 1419 NP\_598514.1  
1416526\_a\_at NP\_065594.2  
1421086\_at, 1421 NP\_035197.2  
1421102\_a\_at, 14 NP\_033524.1  
1433971\_at, 1433 NP\_001075026.1, NP\_001182494.1  
1430471\_at XP\_003945815.1, XP\_003946371.1  
1433880\_at, 1433 NP\_766292.2  
1428521\_at NP\_780361.2, NP\_001139401.1  
NP\_766293.2  
1428081\_at NP\_001028524.1  
1418200\_at NP\_598640.2  
1420432\_at NP\_114073.1  
1429338\_a\_at, 14 NP\_083003.2, NP\_001153071.1  
NP\_001004156.1

1422231\_a\_at NP\_149031.2  
 1423005\_a\_at NP\_997571.1, NP\_997570.1, NP\_997574.2, NP\_062531.2, NP\_997572.1, NP\_997573.

1423029\_at NP\_032262.2  
 1417094\_at NP\_579926.2, NP\_001139529.1, NP\_001139530.1  
 1426973\_at NP\_848493.1  
 1422409\_at NP\_032263.2  
 1426500\_at NP\_598549.1  
 1436277\_at NP\_001028661.2  
 NP\_033105.1  
 NP\_001092769.1

N\_001163019.1 NP\_780496.2, NP\_001156491.1  
 1421229\_at NP\_031885.3  
 1435156\_at NP\_808341.1  
 1428451\_at NP\_957678.1  
 , NM\_001163722.1 NP\_001157193.1, NP\_001157194.1  
 1423923\_a\_at NP\_067474.2  
 NP\_080664.1  
 NP\_001156449.1  
 1429308\_at, 1429 NP\_081780.3, NP\_001171466.1

1423146\_at NP\_034549.1  
 1435004\_at NP\_766578.2  
 NP\_080671.1  
 1430609\_at, 1433 NP\_001074569.1  
 1426373\_at, 1429 NP\_035515.2  
 142115.1  
 1431003\_a\_at NP\_001177374.1  
 1418085\_at NP\_032886.2, NP\_001034168.1  
 1417432\_a\_at, 14 NP\_032168.1, NP\_001153488.1, NP\_001153489.1  
 1418841\_s\_at NP\_031687.2  
 1417281\_a\_at, 14 NP\_036115.1  
 1424862\_s\_at NP\_001243036.1, NP\_660106.2, NP\_001243037.2  
 1427230\_at NP\_848814.3  
 1425674\_a\_at, 14 NP\_081175.2  
 1422461\_at NP\_849534.2  
 \_027972.1  
 1426399\_at NP\_680085.3  
 NP\_001028566.2

XM\_144122.8 XP\_003086467.1, XP\_144122.7  
 1416093\_a\_at NP\_079846.1  
 1432195\_s\_at NP\_997561.1  
 1416245\_at NP\_079614.1  
 NP\_077225.4  
 NP\_034221.3

1420778\_at NP\_114078.1  
NP\_077792.2  
1423964\_at NP\_082296.1  
NP\_001028662.1  
NP\_997106.1  
1426138\_a\_at, 14 NP\_001034246.1, NP\_001034247.1, NP\_067377.4, NP\_001034248.1  
1421155\_at, 1435 NP\_536693.1  
1426393\_a\_at NP\_035471.1  
1426670\_at NP\_067617.3  
1431591\_s\_at NP\_056598.2  
1436080\_at  
NP\_001008234.2  
1435257\_at NP\_938047.1  
1424323\_at, 1436 NP\_067278.2  
1435338\_at NP\_034003.1  
1429193\_at, 1430 NP\_001003909.2  
1428729\_at, 1428 NP\_001164023.1, NP\_109600.2  
1435769\_at NP\_919444.2  
1422533\_at, 1422 NP\_064394.2  
1422985\_at NP\_067432.2  
1424938\_at NP\_081675.2  
1418334\_at, 1430 NP\_001177646.1, NP\_038754.1  
NP\_848881.2  
1434456\_at NP\_941022.1  
NP\_076222.1  
1436337\_at NP\_001074498.1  
1422636\_at NP\_035936.3, NP\_001103797.1  
142117.2  
1429459\_at NP\_083158.3  
1419392\_at NP\_036125.4, NP\_001104266.1  
1427510\_at, 1434 NP\_034435.1  
107664.2  
1420532\_at NP\_056638.1, NP\_001164216.1, NP\_001164217.1  
NP\_001074446.1  
1427081\_at  
1422045\_a\_at NP\_035333.2  
1417657\_s\_at, 14 NP\_033610.1  
1426611\_at, 1435 NP\_035318.1  
1432059\_x\_at, 1435794\_at  
1427236\_a\_at, 14 NP\_081260.1  
\_038090.1  
XP\_003945720.1  
1426631\_at NP\_848490.2  
1431147\_at NP\_796297.2  
NP\_444320.2  
1428091\_at NP\_080724.2, NP\_001155272.1



1424889\_at NP\_694732.3  
NP\_038597.2  
1422622\_at NP\_032739.3  
1434092\_at NP\_001002897.2  
1422015\_a\_at, 14 NP\_083296.2  
NP\_075718.2  
NP\_071863.1  
1423910\_at, 1434 NP\_631892.2, NP\_001243360.1  
1423863\_at, 1427 NP\_001177372.1, NP\_038881.1  
eudogene  
NP\_598674.2  
  
1418467\_at NP\_080167.3  
1419464\_at NP\_001074910.1  
1416636\_at NP\_444305.2  
1423831\_at, 1423 NP\_663376.2, NP\_001164026.1, NP\_001164027.1  
  
1427150\_at, 1434 NP\_001074852.1  
  
XP\_003688855.1  
1423302\_a\_at, 14 NP\_061366.2  
NP\_705746.1  
1418868\_at NP\_034264.1  
1435391\_at NP\_082510.1  
1425605\_a\_at, 14 NP\_064691.2  
1430691\_at  
1426881\_at, 1426 NP\_598668.1  
  
1429776\_a\_at, 14 NP\_001033029.1, NP\_035977.2, NP\_001033030.2, NP\_001120839.1  
NP\_849209.1  
1426522\_at NP\_663533.1  
  
1425341\_at, 1425 NP\_034738.1  
1426220\_at, 1434 NP\_783606.2  
NP\_031707.1  
1427079\_at NP\_579928.1  
142122.1  
1424805\_a\_at, 14 NP\_653108.2  
, NM\_174849.3 NP\_001041657.1, NP\_777274.1  
U\_001134692.1 NP\_077780.3, NP\_001128164.1  
1416414\_at, 1431 NP\_598679.1  
NP\_032465.2  
1419440\_at NP\_067422.1  
NP\_067265.1  
1420387\_at NP\_032648.1  
U\_001127355.1, NI NP\_034252.2, NP\_001120827.1, NP\_001120828.1

NP\_710147.1  
, NM\_175311.4 NP\_001171372.1, NP\_780520.3  
1416792\_at NP\_032040.1  
1423864\_at NP\_671734.1  
1432474\_a\_at NP\_081497.2  
1423068\_at NP\_080574.5  
1431226\_a\_at NP\_071869.2  
1426059\_at NP\_659158.1  
1425843\_at NP\_080072.2  
1424840\_at, 1424 NP\_694876.1  
1426312\_at, 1426 NP\_653124.1, NP\_851796.1, NP\_851798.1, NP\_851797.1, NP\_851799.1  
142126.1  
1422931\_at NP\_032063.2  
1418470\_at NP\_033561.1, NP\_001192061.1, NP\_001192062.1  
1435425\_at, 1435 NP\_796272.2  
1434217\_at, 1434 NP\_919321.2  
1435535\_at NP\_001164038.1, NP\_001020597.1, NP\_808454.2  
1416004\_at NP\_035868.1  
1423031\_at NP\_067475.2  
1430058\_at NP\_033219.1  
1415715\_at, 1431 NP\_080974.2  
1417450\_a\_at NP\_001035525.1  
1421841\_at, 1425 NP\_001156687.1, NP\_032036.2, NP\_001156688.1, NP\_001156689.1, NP\_001192199  
1420825\_at, 1420 NP\_062668.1  
1427248\_at NP\_036044.1  
1434498\_at NP\_001028630.1  
1435842\_at, 1436 NP\_001001985.3  
NP\_862905.1  
1434504\_at NP\_001015039.1  
XM\_003689369.1 XP\_003688863.1, XP\_003689417.1  
1423654\_a\_at NP\_035408.1  
1419488\_at NP\_620703.1  
, NM\_011893.3, NP\_001129560.1, NP\_036023.3, NP\_001139330.1, NP\_001139331.1  
1420953\_at, 1420 NP\_038485.1, NP\_001019629.2, NP\_001095914.1  
1416358\_at NP\_080936.1  
1423991\_at NP\_083554.2  
1425969\_a\_at, 14 NP\_034544.1  
NP\_997160.1  
1429380\_at NP\_775578.2, NP\_001156984.1  
104926.1  
1422152\_at NP\_034575.1  
NP\_084484.2  
1430721\_at  
1420684\_at NP\_109646.2  
1419292\_at, 1427 NP\_001036080.1, NP\_084403.2  
1427619\_a\_at NP\_919325.2  
1435441\_at NP\_001171167.1, NP\_001171168.1, NP\_808346.3, NP\_001171169.1, NP\_001171170

NP\_081649.1  
 1419358\_at NP\_112151.2  
 1417320\_at NP\_077798.1  
 1434569\_at NP\_001163925.1  
 1419306\_at NP\_080001.1  
 1420196\_s\_at, 14 NP\_598671.3, NP\_001106833.1, NP\_001106835.1  
 1418834\_at NP\_598485.1  
 1416496\_at NP\_080518.1  
 1416584\_at NP\_032576.2  
 1\_001136058.1 NP\_031791.3, NP\_001129530.1  
 NP\_067267.2  
 1429447\_at NP\_666032.1  
 1417127\_at NP\_034965.2  
  
 1425011\_x\_at, 14 NP\_081235.2  
 1423055\_at, 1423 NP\_035072.2  
 1428627\_at NP\_083438.1  
 1417511\_at NP\_079557.2  
 NP\_079756.2  
 1423054\_at NP\_035845.1  
 , NM\_001177902.1 NP\_001074613.2, NP\_001171373.1  
 1423990\_at NP\_081571.1  
 1430438\_at NP\_001074891.1  
  
 1434272\_at NP\_001170850.1, NP\_787951.2  
 1433441\_at NP\_848844.1, NP\_001153435.1  
 NP\_077754.3  
 1416508\_at NP\_080171.1  
 1421595\_at NP\_067391.3  
 XM\_003946162.1 XP\_003945439.1, XP\_003946211.1  
 1429171\_a\_at, 14 NP\_062311.1  
 1\_001163073.1, NP\_742165.1, NP\_001156545.1, NP\_835278.2  
 1424659\_at NP\_848919.3  
 1426782\_at, 1431 NP\_598672.1  
 1416144\_a\_at, 14 NP\_031865.2, NP\_001036085.1  
  
 1435161\_at, 1435 NP\_766078.1  
 1418114\_at NP\_001074397.1, NP\_001074396.1, NP\_033061.3  
 1434219\_at NP\_001074572.2  
 1436563\_at  
 1427592\_at NP\_001116230.1, NP\_061234.2  
 1427243\_at NP\_666035.2  
 NP\_062610.2  
 XP\_003084670.2  
 1421604\_a\_at, 14 NP\_032479.1  
 1421352\_at NP\_035734.3

1417272\_at NP\_080943.3

1418342\_at NP\_035388.2  
1426075\_at NP\_112457.1  
1416420\_a\_at NP\_035422.1  
1418700\_at, 1431 NP\_077791.1  
1416308\_at NP\_033492.1  
1416767\_a\_at, 14 NP\_598458.1  
1417186\_at, 1417 NP\_058066.2  
1425082\_s\_at NP\_001074790.1  
1434394\_at NP\_001020088.1  
1426719\_at, 1426 NP\_033816.1, NP\_001188342.1, NP\_001188343.1, NP\_001188344.1, NP\_001188345  
1435106\_at, 1435 NP\_001001980.2, NP\_001243051.1  
1425568\_a\_at, 14 NP\_083251.2, NP\_084384.1  
1426668\_at NP\_848766.2  
NP\_001028587.1  
1423597\_at, 1423 NP\_001034088.1, NP\_033857.1  
NP\_780728.3  
1417145\_at, 1430 NP\_598682.2  
1427024\_at NP\_705795.2, NP\_001106894.1  
1433578\_at NP\_775579.2  
1415758\_at, 1427 NP\_082470.2  
, NM\_001190734.1 NP\_001177662.1, NP\_001177663.1, NP\_849227.1  
1435325\_at, 1436 NP\_808229.1

1423854\_a\_at NP\_081154.1  
1433608\_at NP\_848787.2, NP\_001108132.1  
1421222\_at, 1428 NP\_001153045.1, NP\_077145.2, NP\_001153046.1  
1419659\_s\_at, 14 NP\_083126.1

1421916\_at, 1421 NP\_001076785.1, NP\_035188.2  
NP\_034742.2  
1423573\_at, 1423 NP\_065636.2  
1415741\_at NP\_035756.2  
1418659\_at, 1418 NP\_031741.1  
106299.1  
1432503\_a\_at NP\_075997.1  
1419325\_at NP\_062388.1  
NP\_950197.1  
035181.2  
1423564\_a\_at, 14 NP\_080215.1  
1428876\_at, 1428 NP\_079967.1  
1425564\_at, 1425 NP\_035393.2

1423584\_at, 1423 NP\_032074.3, NP\_001152990.1  
1428523\_at NP\_941991.1

1426827\_at NP\_808348.2  
1417583\_a\_at NP\_075541.1  
1433457\_s\_at, 14 NP\_848815.2, NP\_001091946.1  
1430564\_at NP\_081011.1  
, NM\_177872.2 NP\_001074870.1, NP\_808540.2  
1415726\_at, 1421 NP\_932127.2, NP\_112148.2  
  
1432144\_a\_at NP\_080833.1  
1415697\_at, 1421 NP\_001074263.1, NP\_001074264.1, NP\_001074265.1, NP\_001074266.1, NP\_035946  
1424274\_at NP\_062363.1  
  
NP\_766301.1  
1432539\_a\_at, 14 NP\_899248.1  
NP\_031670.1  
NP\_780479.1  
1429233\_at, 1429 NP\_001009818.1  
1416427\_at NP\_059063.2  
1430895\_at NP\_083639.1  
1416488\_at NP\_031661.3  
1425480\_at, 1425 NP\_659159.1, NP\_849185.2  
NP\_780682.3  
XM\_003946174.1 XP\_003945703.1, XP\_003946223.1  
1421103\_at NP\_542439.1  
1429216\_at NP\_940814.1  
NP\_001028363.1  
  
1426708\_at NP\_598499.1  
1426186\_a\_at NP\_034333.1  
NP\_001019785.1  
N\_181318.4 NP\_665838.1, NP\_851835.1  
  
1425142\_a\_at NP\_001070733.1, NP\_031542.2, NP\_001070735.1, NP\_001070734.1  
XM\_003945655.1 XP\_003946224.1, XP\_003945704.1  
1420093\_s\_at, 14 NP\_057899.2  
1423705\_at NP\_080697.2, NP\_001156507.1  
NP\_081245.1  
  
1427554\_at, 1435 NP\_001074576.1  
1427901\_at NP\_081102.1  
1429774\_a\_at NP\_765993.1  
1427456\_at, 1428 NP\_766470.2  
XM\_003946176.1 XP\_003945705.1, XP\_003946225.1  
1418135\_at, 1425 NP\_598680.3, NP\_001074267.1  
1433526\_at NP\_848856.1  
1417753\_at NP\_032887.3  
1423614\_at NP\_598658.1  
1433505\_a\_at, 14 NP\_848816.3, NP\_001116240.1

1419983\_at, 1419 NP\_081132.2  
107724.1, XR\_140730.1, XR\_140731.1  
1426002\_a\_at, 14 NP\_033993.2  
1425620\_at, 1433 NP\_035708.2  
1417512\_at, 1417 NP\_031990.2  
1423665\_a\_at, 14 NP\_058676.1  
1429503\_at NP\_080338.1  
1416018\_at, 1416 NP\_080382.2  
1436265\_at  
1426703\_at, 1426 NP\_705797.1  
N\_001163531.1, N\_001163532.1, NP\_082499.3, NP\_001157003.1, NP\_001157004.1  
1418793\_at NP\_032351.2  
N\_001164259.1 NP\_473412.1, NP\_001157731.1  
N\_027665.1 NP\_997162.2  
1427350\_a\_at NP\_660129.2  
1425320\_at NP\_001157468.1  
1419159\_at, 1419 NP\_032172.3  
1429082\_at, 1434 NP\_001240743.1, NP\_082198.1  
1428080\_at NP\_082549.2, NP\_001157010.1  
1417841\_at NP\_033019.2  
NP\_001028631.1  
1428403\_at, 1428 NP\_082872.2, NP\_001136114.1  
1423826\_at, 1423 NP\_705798.2  
1428728\_at NP\_081432.2  
1426860\_at NP\_083613.2, NP\_775089.1  
168856.1  
1418869\_a\_at NP\_001020733.1, NP\_062674.2, NP\_001020732.1  
1416504\_at NP\_033495.2  
1422747\_at NP\_057890.1  
1419584\_at, 1432 NP\_001254551.1  
1420307\_a\_at, 14 NP\_062614.1  
NP\_001074704.1  
1418306\_at NP\_076184.1  
1416086\_at NP\_033445.2  
1418145\_at NP\_061253.2  
NP\_001028600.1  
1426072\_at NP\_032179.1  
1417547\_at, 1417 NP\_058622.1  
NP\_079802.1  
1417752\_at NP\_035909.2  
1436009\_at NP\_001028374.1  
NP\_778181.2  
1425753\_a\_at NP\_035807.2, NP\_001035781.1  
1423694\_at NP\_080421.2, NP\_001153413.1  
NP\_473434.2  
1435097\_at NP\_084232.1

1418052\_at, 1430 NP\_076045.1  
NP\_001004180.1  
1423391\_at, 1432 NP\_001070827.1, NP\_001070828.1, NP\_062808.3  
NP\_080994.2  
142173.1  
1428370\_at  
1429244\_at NP\_851420.1  
1423658\_at NP\_083288.2  
NP\_031409.2  
NP\_780561.1  
1436508\_at, 1436 NP\_780612.2  
1421255\_a\_at NP\_038907.1  
1417972\_s\_at, 14 NP\_080674.1  
1423102\_a\_at NP\_057907.2  
1417264\_at, 1417 NP\_080780.1  
1417339\_a\_at NP\_062656.3  
1417727\_at NP\_079849.1  
1425211\_at NP\_083921.1  
NP\_081209.1  
1417417\_a\_at, 14 NP\_031774.1  
1421409\_at NP\_032655.1  
1430900\_at  
1424027\_at, 1426 NP\_035353.1, NP\_598676.2  
1419441\_at NP\_031501.1  
NP\_766307.2  
1420750\_at  
1433922\_at NP\_937806.1  
1424119\_at NP\_114075.1  
106109.1  
1427896\_at, 1427 NP\_848737.3, NP\_001116138.1  
1435964\_a\_at NP\_001074777.1, NP\_899129.2, NP\_001186614.1  
168863.1  
1436591\_at NP\_001028483.2  
1421846\_at, 1421 NP\_067514.2  
NP\_082404.1  
NP\_663539.1  
1418743\_a\_at, 14 NP\_067319.2  
1426944\_at NP\_766309.2  
1434602\_at, 1434 NP\_766012.3  
1\_198052.1 NP\_035665.2, NP\_932169.1  
1423425\_at, 1423 NP\_076114.2  
1417811\_at NP\_573484.2, NP\_001171065.1, NP\_001171066.1  
1434930\_at NP\_665852.1  
NP\_083684.1  
1425822\_a\_at NP\_032078.2  
1421196\_at, 1427 NP\_035332.1, NP\_001103462.1

1416546\_a\_at NP\_035420.2  
1433524\_at NP\_852086.3  
1433766\_at NP\_766310.2  
NP\_080405.1  
1425318\_a\_at, 14 NP\_084188.1, NP\_001155098.1, NP\_001155099.1  
1417016\_at NP\_034895.1  
1434987\_at, 1434 NP\_033786.1  
NP\_848914.2  
1429339\_a\_at NP\_082313.2  
1416738\_at, 1416 NP\_082503.2  
1419866\_s\_at NP\_033151.2  
1433455\_at NP\_032533.1  
NP\_780683.1  
NP\_031830.2  
NP\_038664.2  
NP\_001034242.2  
NP\_796216.2  
1425800\_at NP\_659161.2  
1417659\_at, 1417 NP\_062754.1  
1424192\_at NP\_081159.1  
1424682\_at NP\_077178.1  
NP\_062798.1  
1418458\_at NP\_062779.3  
1416551\_at, 1427 NP\_033852.1, NP\_001103610.1  
1424474\_a\_at, 14 NP\_663333.1, NP\_001186605.1  
1416906\_at, 1433 NP\_067480.2, NP\_001035956.1  
1415791\_at NP\_085041.1  
, NM\_001005866.1 NP\_001003953.1, NP\_001005866.1, NP\_038938.1

168606.1  
1424989\_at, 1424 NP\_780632.1  
1427324\_at NP\_001034812.1  
1434794\_at NP\_780301.1  
142141.2  
NP\_001035488.2  
1423386\_at, 1423 NP\_080276.2  
1428207\_at, 1428 NP\_084126.1  
1417683\_at, 1425 NP\_075721.3  
1434816\_at NP\_084205.3  
1425060\_s\_at, 14 NP\_062739.2  
NP\_001005523.1, NP\_079714.1, NP\_001005523.1, NP\_001005525.1  
1435575\_at NP\_001035886.1  
1420367\_at, 1420 NP\_080879.1  
1424380\_at NP\_808544.1  
1429238\_a\_at NP\_079947.1  
1424285\_s\_at NP\_653092.1  
1419757\_at, 1430 NP\_035386.1



1419909\_at, 1419 NP\_001074792.1  
1426885\_a\_at, 14 NP\_038840.2  
1426559\_at, 1434 NP\_001074672.1  
NP\_067405.1  
1420867\_at, 1420 NP\_062744.1  
, NM\_026409.4 NP\_001177724.1, NP\_080685.2  
1423224\_at NP\_080762.1  
1424513\_at, 1434 NP\_035726.2  
NP\_659068.1  
1434063\_at NP\_001075219.1  
, NM\_001253905.1 NP\_001240833.1, NP\_001240834.1, NP\_035554.3  
1416050\_a\_at NP\_058021.1, NP\_001192011.1, NP\_001192012.1  
1420494\_x\_at, 14 NP\_062613.3  
NP\_780641.2  
NP\_598656.1  
NP\_033417.1  
1424997\_at, 1433 NP\_758480.2  
NP\_035976.3  
1432446\_at NP\_083102.1  
NP\_079726.1  
1419484\_a\_at NP\_032121.3  
1415673\_at NP\_598661.1  
1423517\_at NP\_033968.1  
  
1422315\_x\_at, 14 NP\_035209.1  
NP\_077128.2  
1429671\_at NP\_898911.2  
1419067\_a\_at, 14 NP\_064367.1, NP\_001185988.1  
1428544\_at, 1428 NP\_001074863.1, NP\_082130.1  
1426480\_at NP\_075737.1  
1426781\_at NP\_849228.1, NP\_001015876.1  
1427293\_a\_at NP\_796021.2  
1422151\_at NP\_109644.2  
1416622\_at NP\_291050.1  
1418343\_at NP\_444496.1  
1425628\_a\_at, 14 NP\_001074217.1, NP\_001074215.1, NP\_034495.2, NP\_001074216.1, NP\_001074218  
1422984\_at NP\_001034251.1, NP\_034120.2  
NP\_001013773.1  
1416941\_s\_at NP\_291039.1  
1417627\_a\_at, 14 NP\_034847.1  
142146.1  
NP\_058081.2  
1423575\_a\_at NP\_079651.2  
1418081\_at NP\_079638.2  
, NM\_177574.4 NP\_001186606.1, NP\_808242.1  
1419185\_a\_at NP\_067430.2  
1421927\_at, 1434 NP\_038791.2

NP\_033875.2  
1420975\_at, 1434 NP\_035844.2  
1427529\_at NP\_034376.1  
1420004\_s\_at, 14 NP\_683734.2  
1424755\_at, 1424 NP\_666113.2  
1416933\_at NP\_032924.1  
1435031\_at NP\_766129.1  
1422299\_a\_at NP\_083935.3  
1416478\_a\_at, 14 NP\_032643.2  
1420816\_at, 1420 NP\_061359.2  
NP\_061295.2  
1424667\_a\_at, 14 NP\_941004.2, NP\_034116.3  
1425310\_a\_at NP\_077794.2  
1424575\_at NP\_080349.1  
1425531\_at NP\_081594.1  
1415901\_at NP\_036092.1  
  
1436094\_at NP\_001034474.1  
1416087\_at NP\_031483.1  
1422635\_at NP\_033729.1  
1417807\_at NP\_081632.1  
1417655\_a\_at NP\_113582.1, NP\_001103379.1, NP\_001103380.1  
NP\_035769.1  
1418103\_at NP\_113583.2  
^\_001159571.1 NP\_034274.4, NP\_001153043.1  
NP\_083029.1  
1423460\_at NP\_113596.2  
NP\_034442.1  
1431864\_at NP\_081984.1  
^\_001168652.1 NP\_666276.1, NP\_001162123.1  
1424878\_at, 1424879\_at  
NP\_780730.2  
1430299\_at NP\_076399.4, NP\_084081.1  
1429255\_at NP\_081518.1  
1420140\_at, 1424 NP\_659162.3  
NP\_001005426.2  
1418801\_at, 1429 NP\_084145.1, NP\_598667.2  
NP\_036132.1  
1416030\_a\_at, 14 NP\_032594.1  
  
1418846\_at NP\_067367.3  
1418593\_at NP\_033341.1  
1434214\_at NP\_001074577.1  
NP\_694801.2

1435606\_at NP\_001028588.1  
1429293\_at NP\_766000.1  
1428887\_at NP\_082406.2  
1417688\_at NP\_085042.2  
1418711\_at NP\_032834.1  
1435013\_at NP\_001074734.1  
1426666\_a\_at, 14 NP\_001243044.1, NP\_001243045.1, NP\_077771.1, NP\_001243046.1, NP\_001243047  
NP\_001153737.1  
NP\_082745.2

1423632\_at NP\_084534.2, NP\_001033792.1  
1415940\_at, 1415 NP\_579927.1, NP\_001153380.1

1419633\_at NP\_038730.1  
1426943\_at NP\_081024.3  
1418616\_at NP\_034887.1  
1424477\_at NP\_659163.3, NP\_001155020.1  
1424087\_at, 1430 NP\_079880.1  
NP\_780731.1  
1425252\_a\_at NP\_034882.2  
NP\_080786.1  
NP\_032663.1  
1426674\_at NP\_598677.1  
1420643\_at NP\_032520.1  
142154.1  
NP\_780483.2  
1431246\_at, 1434 NP\_083109.2  
1427316\_s\_at NP\_851411.1, NP\_766312.1  
1421026\_at NP\_034432.1  
1421759\_a\_at, 14 NP\_951031.2  
1433840\_a\_at, 14 NP\_766313.2  
1433523\_at NP\_848817.2  
1427267\_at, 1434 NP\_839973.1, NP\_001116202.2  
NP\_001028484.2  
1419734\_at NP\_031419.1  
1416514\_a\_at, 14 NP\_032010.2  
NP\_808349.1  
NP\_059495.3  
XM\_001472438.3 XP\_001479537.2, XP\_001472488.2  
1433797\_at NP\_766314.3  
1432136\_s\_at NP\_082655.1

1417204\_at, 1417 NP\_080117.1  
1423734\_at NP\_033033.1  
1418758\_a\_at, 14 NP\_035312.3, NP\_001157020.1  
1433554\_at NP\_808350.1

NP\_149028.2  
 NP\_001074578.1  
 1416924\_at NP\_061242.3, NP\_001157181.1  
 1424951\_at NP\_080109.1  
 XP\_003945445.1  
 1420720\_at NP\_058069.1  
 NP\_808403.2  
 1416532\_at NP\_001074831.1  
 1428395\_at, 1428 NP\_083714.3, NP\_001033716.1  
 1416079\_a\_at NP\_062741.1  
 1416226\_at, 1416 NP\_075631.2  
 1434019\_at, 1434 NP\_001028485.1  
 NP\_001008705.1  
 1416391\_at, 1425 NP\_598496.3  
 1424469\_a\_at NP\_848671.1  
 1424892\_at, 1430 NP\_057892.2, NP\_001161416.1  
 1428341\_at, 1429 NP\_082574.1, NP\_001077427.1  
 NP\_001074900.1  
 1427898\_at, 1427 NP\_001243014.1, NP\_001243015.1, NP\_083050.1, NP\_001243016.1  
 NP\_705827.2  
 NP\_062621.2  
 1427027\_a\_at NP\_079928.2  
 1429160\_at NP\_001243029.1, NP\_001243030.1, NP\_083857.1, NP\_001243031.1  
 NP\_542985.4  
 1\_181730.3 NP\_033113.1, NP\_859419.1  
  
 1428768\_at NP\_082567.3  
 1419300\_at NP\_034358.2  
 1416979\_at NP\_079900.1  
 1421533\_at NP\_031539.3  
 NP\_705800.1  
 NP\_034569.1  
 104959.1  
 1423566\_a\_at, 14 NP\_038587.2  
 104961.1  
 1\_485703.5 XP\_980967.1, XP\_485703.2  
 NP\_001074673.1  
 1417707\_at NP\_598659.3  
 1435408\_at NP\_958757.2  
 1435242\_at, 1436 NP\_780519.3  
 1423400\_at NP\_038851.2  
 1427463\_at NP\_663373.2  
 1419193\_a\_at, 14 XP\_003086558.1, XP\_001474001.2  
 1432037\_at NP\_853626.1  
 , NM\_015829.3 NP\_001171043.1, NP\_056644.1  
 XM\_003946183.1 XP\_003945447.1, XP\_003946232.1  
 1\_198854.1 NP\_034186.2, NP\_942151.1

1424803\_at, 1424 NP\_663349.2  
1420283\_at NP\_001161854.1, NP\_083680.2  
1430592\_at, 1435 NP\_082268.2  
1423821\_at, 1423 NP\_083266.1  
1424896\_at, 1424 NP\_659503.1  
1422014\_at NP\_997600.1, NP\_444472.2  
1427040\_at NP\_780297.3  
104968.1  
1424246\_a\_at NP\_997059.1  
1435435\_at NP\_525024.1  
1422834\_at, 1422 NP\_062671.1  
1426776\_at, 1426 NP\_082735.2, NP\_001161217.1  
1434136\_at NP\_795987.2  
NP\_034468.2  
NP\_001075147.1  
1416038\_at NP\_062750.2  
1416097\_at, 1435 NP\_619623.2  
1426513\_at NP\_598686.2  
NP\_001094913.1  
1424699\_at NP\_001188307.1, NP\_663549.3  
NP\_001074654.1  
, NM\_012057.4 NP\_001239311.1, NP\_036187.1  
1427048\_at, 1427 NP\_795970.3  
1419730\_at, 1428 NP\_001164472.1, NP\_001164471.2, NP\_067389.5  
1420978\_at, 1424 NP\_001157698.1, NP\_001157699.1, NP\_001157700.1, NP\_001157701.1, NP\_001157  
1418631\_at, 1418 NP\_033485.1, NP\_001163047.1, NP\_001163048.1  
1423294\_at NP\_001239221.1, NP\_001239222.1, NP\_032616.1  
  
NP\_059506.1  
NP\_001128565.1  
  
1416733\_at, 1416 NP\_038819.1  
1417396\_at NP\_038751.2  
1416548\_at, 1416 NP\_067410.1  
NP\_033788.3  
1424768\_at, 1424 NP\_663550.1  
1431210\_at, 1431 NP\_848745.2  
1430343\_at NP\_081789.1  
1420472\_at, 1420 NP\_032124.1  
NP\_848776.2  
1427258\_at, 1427 NP\_659542.3  
NP\_766055.1  
1428378\_at, 1431 NP\_083140.1, NP\_082697.1  
1435401\_at NP\_705828.2  
1430056\_at, 1436 NP\_796159.3  
1430606\_at NP\_001028343.2  
1424863\_a\_at, 14 NP\_034563.2, NP\_001129537.1

1426774\_at NP\_766481.2

1427359\_at, 1435 NP\_001028602.2

1424920\_at NP\_082399.3

1430148\_at NP\_035356.1

1418434\_at, 1418 NP\_061280.2

1433500\_at NP\_766065.1

1425693\_at, 1435 NP\_647455.3

1417240\_at NP\_035907.1

1422917\_at, 1432 NP\_076069.2

XM\_003946187.1 XP\_003945454.1, XP\_003946236.1  
NP\_036172.1

1416544\_at NP\_031997.2, NP\_001140161.1  
NP\_808550.1

1430626\_at NP\_081753.1, NP\_766622.2

1424297\_at, 1424 NP\_666287.3

U\_001145881.1 NP\_663551.2, NP\_001139353.1

1434857\_at

1433619\_at NP\_849229.2

1429541\_at NP\_001074851.1

1419564\_at NP\_001078886.1, NP\_065614.2, NP\_001078884.1, NP\_001078885.1  
NP\_775604.3  
NP\_899132.1

1425535\_at, 1434 NP\_001073370.2, NP\_001073371.2, NP\_780308.2, NP\_001073374.1, NP\_001073372

1428495\_at NP\_083629.1

1422610\_s\_at, 14 NP\_076159.3

1429680\_at NP\_932770.2

1428484\_at NP\_082157.2, NP\_001157117.1

1433076\_at  
NP\_081840.1

1417520\_at NP\_035033.1

1420565\_at NP\_034579.3

105023.1

1419602\_at NP\_034581.1

1431398\_at XP\_003084693.1, XP\_003689436.1

1427433\_s\_at, 14 NP\_034582.1  
NP\_034583.1  
NP\_034584.1  
NP\_034585.1

1421579\_at NP\_034586.1

1431475\_a\_at NP\_032289.2, NP\_001116422.1

1420414\_at NP\_034580.1

1423780\_at, 1435 NP\_663542.1

1420174\_s\_at, 14 NP\_080092.2  
1428922\_at NP\_080093.1  
1428573\_at, 1428 NP\_076032.2, NP\_001157112.1  
1431276\_at  
1428717\_at, 1428 NP\_081544.1  
1433481\_at NP\_705801.1  
1436128\_at NP\_001001335.1, NP\_001157833.1  
^\_001171007.1 NP\_766317.1, NP\_001164478.1  
1423784\_at NP\_851009.2  
1429022\_at NP\_031433.3, NP\_001020543.1  
1430144\_at, 1433 NP\_084511.1  
1431306\_at NP\_080280.3, NP\_001239303.1  
1431202\_at, 1433 NP\_082981.3  
1435651\_a\_at NP\_031984.1, NP\_001240321.1  
NP\_765987.2  
XP\_994641.2  
1421947\_at NP\_001171027.1, NP\_001171028.1, NP\_079554.1, NP\_001171029.1, NP\_001171030  
NP\_031862.1  
  
1418563\_at, 1418 NP\_080090.2, NP\_001107036.1, NP\_001107037.1, NP\_001107038.1  
1426884\_at, 1431 NP\_077250.2  
NP\_033569.2  
1428165\_at NP\_080059.2  
1426810\_at NP\_001033784.2, NP\_766589.1  
1433509\_s\_at NP\_848723.1  
, NM\_011375.2 NP\_001030305.1, NP\_035505.2  
1426418\_at NP\_722473.1  
NP\_613058.1  
1435538\_at NP\_080972.1  
1424726\_at NP\_659165.1  
1423729\_a\_at NP\_079883.3  
1430522\_a\_at NP\_058568.1, NP\_001074211.1  
1420624\_a\_at NP\_058074.2  
1423554\_at NP\_062776.1  
1423667\_at, 1433 NP\_663544.1  
  
1436207\_at NP\_033358.2, NP\_001073290.1  
1418694\_at, 1418 NP\_062689.2  
1417219\_s\_at, 14 NP\_001034481.1, NP\_001177256.1, NP\_079560.1  
1422612\_at NP\_038848.1  
1418269\_at NP\_038614.2  
1436269\_s\_at NP\_062726.3  
1415742\_at NP\_031543.2  
1430278\_a\_at NP\_291084.1  
1421770\_a\_at NP\_033418.1  
1427956\_at NP\_932109.1  
NP\_001074735.1

NP\_081020.1  
1422489\_at NP\_065644.2  
, NM\_016757.2, NP\_001077392.1, NP\_058037.2, NP\_001077391.1  
1418657\_at NP\_076036.1  
1425601\_a\_at NP\_598396.2, NP\_033132.2, NP\_001129699.1  
1422616\_s\_at, 1418 NP\_076279.1  
1428601\_at NP\_082224.1  
1422521\_at NP\_031861.2, NP\_001185795.1, NP\_001185796.1  
1419253\_at, 1419 NP\_032664.1  
1423782\_at, 1424 NP\_663546.1  
1433970\_at NP\_780486.1  
NP\_898961.2  
  
, NM\_175475.3 NP\_001171184.1, NP\_780684.1  
1434804\_at NP\_796051.2  
1436618\_at NP\_848754.1  
1427405\_s\_at, 1418 NP\_001003955.1, NP\_803417.3  
  
NP\_001007473.1  
1425479\_at NP\_659167.2  
NP\_001001160.1  
NP\_065621.1  
NP\_660258.2  
NP\_036143.1  
1421942\_s\_at, 1418 NP\_112476.1  
1417075\_at NP\_079867.1  
NP\_080782.1  
1423394\_at NP\_080099.1  
1416812\_at, 1416 NP\_035715.1, NP\_001157550.1, NP\_001157551.1  
NP\_035995.1  
1436424\_at  
1417113\_at, 1417 NP\_035948.3  
1421223\_a\_at, 1418 NP\_038499.2  
1418904\_at, 1420 NP\_038556.1  
XM\_003084660.1 XP\_003086582.1, XP\_003084708.1  
NP\_001153169.1  
1425333\_at, 1430 NP\_598478.1, NP\_001034483.1  
1419357\_at NP\_598695.1  
1415670\_at, 1416 NP\_957696.1, NP\_059505.1  
1423786\_at NP\_776098.1  
1436517\_at NP\_941024.1  
  
1416470\_a\_at NP\_598694.3  
1432015\_a\_at NP\_083289.2, NP\_001136196.1  
1426785\_s\_at, 1418 NP\_001159721.1, NP\_001159722.1, NP\_001159723.1, NP\_035974.1  
1434079\_s\_at NP\_032590.2  
NP\_036036.2



1421232\_at, 1428 NP\_032907.1  
1423868\_at, 1423 NP\_694802.2, NP\_001171529.1, NP\_001171530.1, NP\_001171531.1  
1425003\_at NP\_659189.2  
1417158\_at, 1417 NP\_084536.2, NP\_766590.1  
NP\_075673.1  
1427145\_at NP\_001127855.1, NP\_001127856.1  
1417585\_at NP\_061285.2  
1420148\_at, 1421 NP\_033346.2

1428929\_s\_at NP\_080531.2  
1419928\_at, 1434 NP\_032403.2  
1433902\_at NP\_001008785.2, NP\_001096140.1  
1427441\_a\_at, 14 NP\_035637.2  
1433671\_at, 1434 NP\_780522.1  
NP\_001074580.1  
1417202\_s\_at, 14 NP\_035796.2, NP\_001104576.1  
1426331\_a\_at, 14 NP\_660130.2  
1417977\_at, 1417 NP\_080105.1  
1422154\_at NP\_032184.1  
1421111\_at, 1428 NP\_062717.2  
1428927\_at NP\_853621.2  
1416846\_a\_at NP\_061372.2  
1425561\_at, 1425 NP\_001229289.1, NP\_001229287.1, NP\_081572.1  
1423094\_at, 1423 NP\_780566.1, NP\_067424.2  
1424603\_at, 1424 NP\_666049.2  
1418819\_at, 1428 NP\_080287.1  
1424065\_at NP\_619618.1  
1426000\_at NP\_001074616.1  
1417684\_at NP\_032214.1  
\_027009.1, NR\_027010.1  
NP\_082661.1  
NP\_733773.2  
NP\_084454.1  
1430078\_a\_at NP\_035087.3  
1417604\_at, 1417 NP\_598687.1  
NP\_848460.1  
1417064\_at NP\_001191954.1, NP\_080641.1, NP\_001230668.1  
1419671\_a\_at NP\_598920.3, NP\_849273.1  
1416537\_at NP\_598691.1  
NP\_766075.2  
NP\_780310.1  
1430916\_at NP\_001028416.2  
1429865\_at NP\_081909.2  
1423188\_a\_at, 14 NP\_598698.1  
1421071\_at, 1434 NP\_033533.1  
1436507\_at NP\_751893.3, NP\_001107025.1  
NP\_001028635.2

1416078\_s\_at, 14 NP\_084056.1  
1429621\_at, 1429 NP\_080234.2  
NP\_742083.1  
NP\_001103976.1  
NP\_080652.2  
NP\_803131.1  
XM\_985182.2 XP\_003086574.1, XP\_990276.1  
1429642\_at NP\_001074786.1  
1428385\_at NP\_082196.1  
1417574\_at NP\_068350.1, NP\_038683.1, NP\_001012495.1  
^\_001166427.1, NP\_598595.1, NP\_001159899.1, NP\_001159900.1, NP\_001159901.1, NP\_001159902  
1433636\_at NP\_919320.1  
1436473\_at NP\_082611.1  
1421297\_a\_at NP\_033911.2, NP\_001153005.1, NP\_001153006.1, NP\_001153007.1, NP\_001242926  
NP\_001028551.2  
1422602\_a\_at NP\_033551.2  
1417407\_at NP\_598701.2  
1421501\_a\_at, 14 NP\_835186.1, NP\_444434.2  
1430158\_at  
1433676\_at NP\_001171949.1, NP\_001171950.1, NP\_941992.2, NP\_001186012.1, NP\_001186013  
NP\_942585.1  
1425734\_a\_at, 14 NP\_080304.1  
NP\_666109.2  
1420904\_at, 1420 NP\_032385.1  
1424816\_at NP\_659064.1  
1431014\_at NP\_001121623.1  
1420038\_at NP\_031536.2  
1417045\_at NP\_031570.2  
1434221\_at NP\_001257404.1, NP\_700445.2  
NP\_080543.2  
1422063\_a\_at, 14 NP\_787947.1, NP\_033021.2  
1423960\_at NP\_660112.1  
1416393\_at NP\_038564.1  
1416202\_at NP\_031557.2  
^\_001077705.1 NP\_038573.2, NP\_001071173.1  
1416522\_a\_at, 14 NP\_038563.1  
1421149\_a\_at NP\_031907.2  
1422106\_a\_at NP\_038567.1  
1415918\_a\_at, 14 NP\_033441.2  
NP\_038728.1  
NP\_032505.1  
1428707\_at, 1428 NP\_081264.1

105027.1  
1423916\_s\_at NP\_663360.1, NP\_001163812.1  
1423245\_at, 1429 NP\_036133.1, NP\_001157561.1  
^\_001145926.1, N^ NP\_783627.2, NP\_001139398.1, NP\_001139399.1  
1436343\_at NP\_666091.1  
1424019\_at NP\_620086.2  
^\_001039669.2 NP\_848902.4, NP\_001034758.1  
NP\_032110.1  
1423847\_at, 1430 NP\_666283.1  
1421862\_a\_at, 14 NP\_033522.1, NP\_001074026.1  
1424961\_at NP\_663366.2  
1416435\_at NP\_034866.1  
1425088\_at NP\_035454.2  
1416066\_at NP\_031683.1  
1417938\_at, 1417 NP\_033039.2  
NP\_613060.1  
1422176\_at NP\_073148.1  
1435929\_at NP\_795977.1  
1416122\_at, 1416 NP\_033959.1  
\_040274.1, NR\_040275.1  
1428197\_at NP\_780623.1  
1418251\_at NP\_035787.1  
XP\_003945451.1  
1431298\_at  
1417748\_x\_at NP\_032047.4  
NP\_034349.1  
\_028593.1  
1423401\_at, 1434 NP\_031987.3  
1428500\_at NP\_032540.2  
1435085\_at NP\_808355.1  
1419497\_at, 1434 NP\_034005.2  
\_037956.1  
NP\_001103384.1  
1420630\_at, 1427 NP\_083258.2  
NP\_783583.1  
1424771\_at, 1424 NP\_808356.1  
1415799\_at, 1430 NP\_068360.4  
^\_001164212.1, N^ NP\_871788.1, NP\_001157684.1, NP\_001157686.1  
1422823\_at, 1422 NP\_031971.2  
1425543\_s\_at, 14 NP\_659169.3  
1421021\_at, 1434 NP\_001005605.1, NP\_033767.1, NP\_848918.1  
1431913\_a\_at, 14 NP\_061249.1  
NP\_898988.2  
1418339\_at, 1425 NP\_075529.2, NP\_001191835.1, NP\_001191836.1  
NP\_080148.1  
1416183\_a\_at, 14 NP\_032518.1

1426662\_at NP\_034038.2  
1419694\_at, 1419 NP\_035504.2  
1428220\_at, 1432 NP\_083357.2, NP\_084173.1, NP\_001103158.1  
1430996\_at, 1433 NP\_083526.2  
1430111\_a\_at NP\_001019639.1, NP\_031558.3  
1426228\_at, 1426 NP\_067259.4  
1436060\_at  
1421099\_at NP\_077789.1  
1421678\_at, 1424 NP\_034716.1, NP\_064307.2  
1428098\_a\_at NP\_080557.2  
1425806\_a\_at NP\_079591.1  
1435877\_at, 1435 NP\_766322.1  
^\_001170433.1 NP\_080497.1, NP\_001163904.1  
1420328\_at NP\_079896.1  
NP\_663548.2  
NP\_001030075.1  
1426988\_at NP\_001074706.1  
  
1418459\_at, 1430 NP\_080187.2  
1424462\_at NP\_080631.1, NP\_080444.1  
  
1435261\_at NP\_945318.2  
NP\_062617.2  
1415875\_at  
NP\_796166.2  
1427334\_s\_at, 14 NP\_080330.1  
^\_001159714.1 NP\_081604.3, NP\_001153186.1  
1435965\_at NP\_666288.1  
  
1422694\_at, 1422 NP\_067299.2, NP\_001001454.2, NP\_001103235.1  
  
1435152\_at NP\_766324.1  
NP\_780738.1  
1418712\_at, 1430 NP\_067429.1  
1432550\_at NP\_084304.1  
1429261\_at NP\_083660.1  
NP\_033107.1  
1416726\_s\_at, 14 NP\_598538.1  
1419787\_a\_at NP\_739565.2  
1435961\_at NP\_958743.1  
NP\_766596.1  
1428564\_at NP\_081017.1  
1423733\_a\_at NP\_001103798.1, NP\_035943.3, NP\_001103799.1, NP\_001103800.1  
NP\_079600.1  
NP\_001028555.1  
NP\_001034621.1

1429634\_at NP\_081176.1  
1426097\_a\_at NP\_666290.2  
1417260\_at NP\_001192160.1, NP\_598432.2  
1427039\_at NP\_001239383.1, NP\_034277.1  
1435015\_at NP\_001013030.1  
NP\_001128224.1  
1417355\_at, 1417 NP\_032843.2  
1419237\_at, 1427 NP\_067298.2  
1429799\_at, 1436 NP\_080388.2, NP\_001035040.1  
NP\_848847.3  
NP\_033538.2  
1435802\_at NP\_001019870.1  
1415869\_a\_at NP\_035718.2  
1425591\_a\_at NP\_081161.1  
1424345\_s\_at, 14 NP\_001161941.1, NP\_001230897.1, NP\_663553.1  
1420738\_at NP\_665818.2  
NP\_001092747.1  
1416192\_at NP\_080174.1  
1428054\_at NP\_683748.1  
NP\_001129742.1  
^\_001136471.1 NP\_758501.2, NP\_001129943.1  
1423315\_at NP\_573497.1  
1416443\_a\_at, 14 NP\_062722.1  
1434459\_at NP\_941033.2  
NP\_081214.1  
1420801\_at NP\_032744.1  
1416629\_at NP\_033227.2  
NP\_775606.1  
1426209\_at NP\_001034967.1, NP\_598550.2  
NP\_031616.1  
1435960\_at NP\_001093106.1  
NP\_001095005.1  
1424115\_at, 1424 NP\_035285.2  
1421572\_at, 1425 NP\_058564.2, NP\_001156422.1  
NP\_918953.2  
NP\_663554.1  
NP\_848872.2  
1431900\_a\_at NP\_032286.1  
1428673\_at NP\_080881.2  
^\_001159671.1 NP\_112545.2, NP\_001153143.1  
1435505\_at NP\_034188.2  
1422989\_a\_at, 14 NP\_001177419.1, NP\_001177420.1, NP\_115794.1  
  
1427560\_at NP\_035513.1  
NP\_080387.2  
NP\_081219.1  
NP\_001074284.1

NP\_033525.2  
NP\_808359.1  
1419056\_at NP\_038676.1, NP\_001020535.1

1422134\_at NP\_032062.1  
XP\_003945819.1  
1417328\_at NP\_031974.2, NP\_001120796.1  
1430138\_at NP\_665821.1  
NP\_001010836.1  
NP\_758483.1  
1428867\_at XP\_001471800.2, XP\_001471801.3  
1427390\_at NP\_808360.2  
1417034\_at NP\_080236.2  
1430087\_at NP\_081392.1  
NP\_954600.1  
1435764\_a\_at NP\_081465.1  
1417856\_at NP\_033072.2  
1416883\_at NP\_062623.2  
1418069\_at NP\_033825.1  
1417703\_at, 1424 NP\_033016.3, NP\_001153196.1  
1424791\_a\_at NP\_065232.1  
NP\_035243.1  
1426263\_at NP\_694752.1  
1424490\_at NP\_666295.2  
1435540\_at NP\_694774.3  
1429835\_at NP\_001032220.1  
NP\_001028377.1  
1417203\_at NP\_075643.1  
NP\_082008.1  
NP\_075622.1  
1427773\_a\_at NP\_034391.1  
1424856\_at, 1427 NP\_659170.1  
1418784\_at NP\_032194.2  
1434128\_a\_at, 14 NP\_780686.1, NP\_001161978.1  
1427713\_x\_at, 14 NP\_001157026.1, NP\_001157027.1, NP\_035268.2, NP\_001157028.1  
NP\_997560.3  
1429800\_at NP\_780645.1  
1435638\_at NP\_001026837.1

1422114\_at, 1435 NP\_034285.3  
1415746\_at NP\_082158.2, NP\_001103601.1, NP\_001103602.1  
1416410\_at NP\_032802.1  
NP\_001074763.1  
NP\_899134.2  
NP\_001153872.1  
1416775\_at, 1430 NP\_079780.2  
1425128\_at NP\_001031817.1, NP\_666296.1

1416647\_at NP\_031559.3  
 1427947\_at NP\_742160.1  
 1420653\_at NP\_035707.1  
 A\_144922.2 NP\_835190.1, NP\_659171.1  
 1423586\_at NP\_033491.2, NP\_001177903.1, NP\_001177904.1  
 NP\_001093654.1  
 1416533\_at NP\_444438.2  
 NP\_083667.1  
  
 A\_001046637.1 NP\_056597.3, NP\_001040102.1  
 NP\_001230817.1  
  
 NP\_853624.1  
 NP\_598531.2  
 1436665\_a\_at NP\_783572.2, NP\_001107021.1  
 1424174\_at NP\_619617.2  
 1425116\_a\_at NP\_115999.2, NP\_001186163.1, NP\_001186164.1, NP\_001186165.1  
 1431712\_a\_at NP\_780316.3, NP\_001116239.1  
 1421324\_a\_at, 14 NP\_031460.1, NP\_001103678.1  
 1436373\_at NP\_001074761.1  
 A\_001112731.1 NP\_940809.2, NP\_001106202.1  
 NP\_001158127.1  
 NP\_032017.2  
 1422254\_a\_at NP\_034222.1, NP\_001033046.1  
 NP\_940817.1  
 NP\_001170898.1  
 NP\_778198.2  
 NP\_031892.2  
 NP\_079892.1  
 1424255\_at NP\_038704.1  
 1418201\_at NP\_001077381.1, NP\_620091.2  
 NP\_035886.1  
 1421902\_at, 1421 NP\_080318.2  
 1434122\_at NP\_997121.1, NP\_001157174.1  
 1431100\_at NP\_796132.2  
 1424101\_at NP\_796275.3  
 1423449\_a\_at NP\_068695.1  
 NP\_082935.1  
 1425380\_at NP\_001167626.1, NP\_660131.2  
 NP\_001139495.1  
 1435852\_at NP\_891557.3  
 A\_182694.2 NP\_874355.1, NP\_874353.2  
 1423296\_at NP\_080821.3  
 1425852\_at NP\_001158130.1  
 1435342\_at NP\_001028697.2  
 1428445\_at NP\_084163.2, NP\_001103671.1  
 A\_001082548.1 NP\_035594.1, NP\_001076017.1

1418086\_at NP\_081007.2  
1420529\_at, 1420 NP\_038902.1  
1432882\_at, 1432883\_at  
^\_178733.5 NP\_035878.1, NP\_848848.1  
, NM\_177889.5, NI NP\_001239448.1, NP\_808557.2, NP\_001240314.1, XP\_003946270.1, XP\_003946271.  
1425007\_at NP\_690027.1  
1418709\_at NP\_034074.1  
1426400\_a\_at NP\_033925.2  
NP\_666298.3  
168915.1  
NP\_932144.2  
1427175\_at, 1427 NP\_705805.1  
1433936\_at NP\_001028312.2  
NP\_780687.1  
NP\_083550.2  
1432459\_a\_at NP\_067372.2  
1421286\_a\_at NP\_061201.2  
1428465\_at NP\_081491.2  
105081.1  
NP\_032111.1  
NP\_035810.1  
105082.1  
^\_001164184.1, NI NP\_059101.1, NP\_001157656.1, NP\_001157657.1  
^\_001242647.1, NI NP\_780449.2, NP\_001229576.1  
1418296\_at NP\_032787.1, NP\_001104543.1  
1419200\_at NP\_071290.1  
1421374\_a\_at NP\_919302.1, NP\_443718.1, NP\_062376.2, NP\_443717.1  
1434121\_at NP\_653139.2  
1416708\_a\_at NP\_082174.3  
1416280\_at, 1433 NP\_057891.1  
  
1426844\_a\_at, 14 NP\_080825.1  
1420997\_a\_at, 14 NP\_032181.2, XP\_003689494.1  
1428436\_at, 1428 NP\_080224.1  
1435339\_at NP\_666300.1  
1428977\_at NP\_780349.3  
1416712\_at NP\_032846.2  
1425261\_at, 1425 NP\_034014.1  
1418982\_at NP\_031704.2  
1432332\_a\_at, 14 NP\_149071.2  
NP\_665839.1  
1425112\_at NP\_663608.3, NP\_839994.1  
NP\_062720.1  
NP\_848819.2  
1435002\_at NP\_808407.2  
  
1435337\_at NP\_758502.1



1419273\_at, 1419 NP\_035404.4  
1430088\_at NP\_001004139.2  
1432439\_at, 1434 NP\_081540.3  
1432186\_at  
NP\_080156.2  
  
NP\_001181963.1  
1418796\_at NP\_033157.1  
NP\_001029287.1  
NP\_081325.1  
NP\_035261.3  
1416353\_at NP\_033499.1  
1425927\_a\_at NP\_109618.1  
1419192\_at NP\_001164495.1  
1415925\_a\_at, 14 NP\_444304.1  
1423659\_a\_at NP\_001036120.1  
1428158\_at NP\_001240849.1, NP\_080546.1  
  
1416378\_at NP\_067524.2  
1416945\_at NP\_598710.1  
NP\_083641.1  
N\_001077264.1 NP\_031484.1, NP\_001070732.1  
1428865\_at NP\_083686.1  
1416898\_a\_at, 14 NP\_058545.1  
1434908\_at NP\_001008422.1  
1418448\_at NP\_033127.1  
NP\_778187.2  
1424329\_a\_at, 14 NP\_075375.1  
1418965\_at, 1431 NP\_079809.1, NP\_001157156.1  
1424382\_at NP\_080831.2  
1423731\_at NP\_666066.1  
NP\_083682.1  
1428986\_at NP\_892038.2  
I\_914689.4 XP\_355900.5, XP\_919782.4  
1432395\_at NP\_001028348.1  
1431046\_at NP\_084017.2  
1420605\_at  
1418683\_at NP\_035828.1  
1429009\_at, 1429 NP\_033250.3  
NP\_034726.2  
NP\_937833.1  
XM\_003689410.1 XP\_003688884.1, XP\_003689458.1  
NP\_032523.2  
1422482\_at NP\_035434.1  
1416737\_at NP\_109603.2  
1424379\_at NP\_033930.1

1418174\_at NP\_058670.2  
 1417431\_a\_at, 14 NP\_001166032.1, NP\_064395.2, NP\_975009.1  
 1436699\_x\_at NP\_033103.2  
 1430717\_at NP\_001028342.2  
 1429705\_at NP\_081331.2  
 105108.1  
 NP\_001005511.2  
 A\_001112701.1 NP\_035311.1, NP\_001106171.1  
 NP\_666075.1  
 NP\_700468.2  
 1421393\_at NP\_032198.2  
 NP\_598711.1  
 NP\_659050.2  
 1417104\_at NP\_034259.2, NP\_001139818.1  
 1421212\_at NP\_061265.2  
 NP\_694697.3  
 1418420\_at NP\_034996.2  
 1434677\_at NP\_001005247.2, NP\_001005248.2, NP\_001161336.1  
 NP\_032212.3  
 I\_357752.5 XP\_920076.2, XP\_357752.4  
 1419737\_a\_at NP\_034829.1, NP\_001129541.2  
 1417004\_at NP\_068684.1  
 1421785\_at NP\_001035785.1  
 1433483\_s\_at  
 1434885\_at NP\_780527.2  
 1428758\_at NP\_080712.1  
 1436186\_at NP\_001013386.2  
 105111.2  
 1430716\_at, 1435 NP\_780481.2, NP\_001104486.1  
 A\_001146049.1, NINP\_058561.2, NP\_001139521.1, NP\_001139522.1, NP\_001139524.1, NP\_001139525  
 1426749\_at, 1431 NP\_598501.1  
 1416329\_at NP\_035500.2, NP\_001158133.1, NP\_001158134.1  
 1421968\_a\_at, 14 NP\_001243059.1, NP\_001243060.1, NP\_076136.2, NP\_001243061.1, NP\_001243062  
  
 1433602\_at NP\_795916.1  
 NP\_033858.2  
 1416680\_at, 1416 NP\_035798.2, NP\_001029134.1, NP\_766598.1  
 1418160\_at NP\_035876.2  
 1420406\_at NP\_038816.1  
 1432543\_a\_at, 14 NP\_067341.2  
 1430346\_at, 1433 NP\_898910.2  
 1422554\_at NP\_075728.1  
 XM\_975528.2 XP\_003086660.1, XP\_980622.2  
 1434738\_at NP\_758514.2  
 1423951\_at NP\_081071.1, NP\_835157.1  
 1426981\_at NP\_035178.1  
 1417351\_a\_at, 14 NP\_067311.4

1435735\_x\_at NP\_077759.3  
1434316\_at NP\_001074632.1  
NP\_666303.3  
1417642\_at, 1427 NP\_444310.3  
NP\_001029049.2  
1421252\_a\_at, 14 NP\_001028885.1  
A\_183312.3, NM\_2 NP\_964001.2, NP\_899135.3, NP\_997546.2  
1426565\_at, 1428 NP\_034643.2  
1424759\_at, 1426 NP\_001036057.1, NP\_079825.2  
1416158\_at, 1416 NP\_899084.2, NP\_033827.2  
1436658\_at  
\_040325.1  
NP\_808408.2

105120.1  
1434273\_at NP\_001156004.1  
1420377\_at NP\_033207.2  
1418030\_at, 1434 NP\_001033732.1, NP\_076397.2  
1430185\_at, 1430 NP\_083608.1

1423957\_at NP\_080807.3, NP\_001156411.1  
1418661\_at, 1435 NP\_061281.3  
1423272\_at, 1423 NP\_059490.2

1429860\_at, 1435 NP\_084111.1  
NP\_034756.2  
A\_001113471.1 NP\_783571.2, NP\_001106942.1  
1435168\_at, 1435 NP\_780642.3, NP\_001139471.1, NP\_001139472.1

NP\_766599.2  
1427586\_at NP\_038687.2  
1425856\_at NP\_036000.1  
NP\_848867.2  
1433426\_at, 1433 NP\_808433.2  
1416709\_a\_at NP\_113552.3  
1427933\_at NP\_835171.2  
1423774\_a\_at, 14 NP\_660132.2  
1415866\_at NP\_598713.2  
1428692\_at NP\_081088.1  
1435203\_at NP\_766491.2  
1427368\_x\_at NP\_034324.2  
1418518\_at NP\_035176.1, NP\_001074923.1  
1436379\_at NP\_776288.2  
1417379\_at, 1417 NP\_057930.2  
NP\_033579.1  
1434160\_at NP\_848822.2  
1418406\_at, 1418 NP\_032829.1

NP\_033118.1  
 1417960\_at NP\_001239454.1, NP\_001239455.1, NP\_031781.1  
 1426927\_at NP\_067467.2  
 NP\_766492.2  
 NP\_001004185.3  
 NP\_080273.1  
 NP\_666305.2  
 1424443\_at NP\_663350.2  
 1423252\_at, 1435 NP\_038914.2  
 1424890\_at NP\_031588.2  
 NP\_808562.3  
 1430333\_at NP\_780526.2, NP\_001153144.1  
 1431783\_at  
 NP\_780575.2  
 1416397\_at, 1416 NP\_109630.1  
 1416181\_at NP\_075892.3  
 1423519\_at NP\_598483.2  
  
 1419301\_at NP\_032081.3  
 \_046007.1  
 , NM\_001252521.1 NP\_001239449.1, NP\_001239450.1, NP\_666306.2, NP\_001239451.1, NP\_001239452  
 1425698\_a\_at, 14 NP\_660133.2  
 NP\_079736.1  
 1429522\_at NP\_082941.2  
 1427159\_at, 1427 NP\_083354.3  
 1417862\_at NP\_067402.2  
 1434530\_at NP\_035988.2  
 1419829\_a\_at, 14 NP\_034378.2, NP\_001155949.1  
 NP\_001170883.1  
 1435692\_at NP\_001034128.2  
 , NM\_001177946.1 NP\_001171416.1, NP\_001171417.1, NP\_899074.2, NP\_001171418.1  
 NP\_001074736.1  
 XP\_003945464.1  
 1423181\_s\_at, 14 NP\_076160.1  
 1421385\_a\_at NP\_032689.2, NP\_001243010.1, NP\_001243011.1, NP\_001243012.1  
 1418671\_at NP\_031628.1  
 \_045970.1, NR\_045971.1, NR\_045972.1  
 1429520\_a\_at NP\_079684.2  
 , NM\_001168539.1 NP\_001019790.1, NP\_001162011.1, NP\_001162012.1, NP\_001162013.1  
 , XM\_003689425.1 NP\_001106850.1, XP\_003689473.1  
 1424928\_at, 1430 NP\_758484.2  
 NP\_033545.1  
 NP\_848750.3  
 1422677\_at, 1422 NP\_080660.1  
 1422550\_a\_at NP\_034967.2, NP\_001041632.1, NP\_001036820.2  
 NP\_001111043.1, NP\_033955.2, NP\_001104513.1, NP\_001104514.1  
 1424150\_at NP\_958740.2

1429945\_at NP\_082421.1  
1435151\_a\_at NP\_036182.1

NP\_001182458.1  
1434207\_at, 1434 NP\_780597.2  
1426838\_at, 1426 NP\_598453.1  
1423357\_at NP\_080286.2  
NP\_081905.1  
NP\_796135.3  
NP\_035801.3  
1431119\_at NP\_705755.2  
1428302\_at NP\_942128.2, XP\_003946293.1, XP\_003946291.1, XP\_003946292.1  
^\_001163663.1 NP\_077249.1, NP\_001157135.1  
NP\_796047.2  
1419938\_s\_at, 14 NP\_001074585.1  
1425214\_at NP\_898991.1  
1434260\_at NP\_950177.2, NP\_001139482.1  
1416541\_at NP\_033217.1  
^\_001122739.1 NP\_034697.2, NP\_001116211.1  
NP\_032061.1  
1423974\_at, 1423 NP\_598708.3  
1434220\_at NP\_075355.1  
1422572\_at NP\_062512.1  
NP\_033313.2  
1423892\_at, 1423 NP\_001240814.1, NP\_001240815.1, NP\_033815.1, NP\_001240816.1  
1423944\_at NP\_059067.2  
1417916\_a\_at, 14 NP\_062375.1  
1416559\_at NP\_598712.1, NP\_080173.1  
^\_001161724.1 NP\_034692.2, NP\_001155196.1  
NP\_064408.2  
1434768\_at NP\_034036.1  
1429163\_at NP\_001156415.1  
NP\_079577.1  
NP\_780741.1  
NP\_079620.2  
NP\_473444.1  
1430157\_at  
^\_001170912.1, NP\_862901.3, NP\_001164383.1, NP\_001164384.1  
NP\_036105.2

1428372\_at NP\_001001326.1, NP\_084087.2  
1417874\_at NP\_064434.1  
1429885\_at  
1418104\_at, 1431 NP\_065635.1  
NP\_852658.2  
1416773\_at, 1416 NP\_033542.2

1423543\_at, 1434 NP\_033328.3  
1422573\_at NP\_033797.2  
1418466\_at, 1433 NP\_080275.2  
1429379\_at NP\_444477.2  
1422679\_s\_at, 14 NP\_033457.2  
1415863\_at, 1428 NP\_038535.2, NP\_001035221.1  
168880.1  
1426976\_at, 1426 NP\_598519.2, NP\_796223.2  
^\_001193305.1 NP\_796256.1, NP\_001180234.1  
1416818\_at, 1431 NP\_065631.3  
1429226\_at  
1423434\_at, 1429 NP\_033372.1, NP\_001160056.1, NP\_001160057.1  
NP\_598461.1  
1426369\_at, 1426 NP\_081655.2, NP\_080419.2  
1417398\_at NP\_080122.2  
1423301\_at NP\_203534.1  
1415695\_at NP\_036095.1  
\_029438.1  
1433694\_at NP\_035185.2  
1421023\_at, 1425 NP\_035213.2  
NP\_733769.1  
1423818\_a\_at, 14 NP\_062292.1  
1428539\_at NP\_001026984.1  
  
1422955\_at, 1433 NP\_619590.1  
1435777\_at NP\_001028552.1  
1418444\_a\_at NP\_062526.1  
NP\_892040.1  
1420548\_a\_at, 14 NP\_075686.2, NP\_001161690.1, NP\_001161691.1, NP\_001161692.1  
NP\_001074915.1  
1424613\_at NP\_071865.1, NP\_001182703.1  
1436673\_at NP\_775584.1, NP\_001157175.1  
1430831\_at, 1431 NP\_083886.1  
1428631\_a\_at, 14 NP\_080175.1  
XM\_488079.6 XP\_003086684.1, XP\_488079.6  
, NM\_001267711.1 NP\_001254639.1, NP\_001254640.1, NP\_031934.1  
1429456\_a\_at NP\_079574.2, NP\_001157568.1  
1417430\_at NP\_031698.2  
1431904\_at, 1431 NP\_083231.1  
1417710\_at NP\_067529.2  
1419828\_at, 1431 NP\_001028345.1  
NP\_001028490.2  
1428141\_at NP\_083034.1  
1424774\_s\_at NP\_080416.1  
1418132\_a\_at, 14 NP\_613055.2  
1434808\_at NP\_001074707.1  
1415748\_a\_at NP\_067621.3

NP\_035251.3  
1423478\_at NP\_032881.1  
1432816\_s\_at, 1432817\_x\_at  
1425114\_at, 1425 NP\_035377.2, NP\_778188.1  
1425036\_a\_at, 14 NP\_659174.3  
1434066\_at NP\_997122.1  
1435366\_at NP\_001074491.1  
1436013\_at NP\_001094958.1  
1422759\_a\_at NP\_083092.2  
1423978\_at NP\_663562.1  
1425602\_a\_at NP\_085043.2  
1433952\_at NP\_766333.1, NP\_001157185.1  
NP\_898841.1  
1415858\_at, 1415 NP\_666312.1  
1417551\_at NP\_034037.3, NP\_001139783.1  
\_033446.1 NP\_083696.2  
1434543\_a\_at, 14 NP\_780312.1  
1416246\_a\_at, 14 NP\_034028.1  
1427060\_at NP\_036082.1  
NP\_077190.2  
1426624\_a\_at NP\_081151.2, NP\_079623.1  
NP\_035668.2  
NP\_062648.1  
1416921\_x\_at, 14 NP\_001170778.1, NP\_001170779.1, NP\_031464.1  
1434154\_at NP\_766335.1  
NP\_001034734.1  
1423983\_at, 1434 NP\_001239495.1, NP\_001239496.1, NP\_659175.1  
1436255\_at  
1423657\_at, 1436 NP\_080914.1  
NP\_542369.2  
1429113\_at NP\_084516.1  
NP\_001096033.1  
1427099\_at NP\_034902.1  
1423813\_at NP\_663563.1  
1428358\_at, 1428 NP\_081194.1  
1424236\_at NP\_653105.3  
NP\_058034.1  
NP\_059489.2  
  
1426563\_at, 1426 NP\_666313.1  
NP\_796336.1  
1418325\_at, 1435 NP\_033292.2  
1425367\_at, 1435 NP\_001240801.1, NP\_001240802.1, NP\_032426.2, NP\_001240803.1  
1424506\_at NP\_666314.1  
1427970\_at NP\_780372.2  
NP\_663564.2  
1428732\_at

XM\_003084736.1 XP\_003086692.1, XP\_003084784.1  
NP\_758485.2

1420681\_at  
1436537\_at NP\_796200.1  
NP\_033876.1

NP\_031821.1  
NP\_942155.1

1435922\_at NP\_766336.2  
1434064\_at NP\_940816.1  
1427116\_at NP\_821172.2  
NP\_033320.1  
NP\_666371.1  
NP\_766337.2  
NP\_001074737.1

1429164\_at NP\_001074843.2  
1424812\_at NP\_663565.2

1416882\_at NP\_080694.1  
1422452\_at NP\_038891.4  
1424348\_at NP\_666067.1  
1433627\_at NP\_001025153.2  
1420847\_a\_at, 14 NP\_034337.2, NP\_963895.2  
1420036\_at, 1420 NP\_038827.2, NP\_001025066.1, NP\_001129526.1  
1428213\_at NP\_001156327.1  
1425745\_a\_at NP\_001004468.1, NP\_996738.2, NP\_067289.2  
107956.2

1417965\_at NP\_598703.1  
1416749\_at NP\_062510.2  
1429508\_at, 1430 NP\_080931.1  
1434516\_at NP\_001034623.1  
1429431\_at, 1436 NP\_780324.2  
NP\_080102.1

1425804\_at NP\_666110.1  
1416815\_s\_at NP\_033904.2  
NP\_775586.1

1426514\_at NP\_084211.2  
142252.1

1431173\_at NP\_997638.1, NP\_780477.2  
1425737\_at, 1430842\_at  
1422887\_a\_at, 14 NP\_034110.1, NP\_001164215.1

NP\_835216.3

1423482\_at NP\_033505.1  
NP\_079668.2

1420427\_a\_at NP\_598702.1



1419566\_at, 1419 NP\_080126.1  
NP\_001028592.1  
1434345\_at NP\_848784.1  
1418539\_a\_at, 14 NP\_035342.3  
1426817\_at NP\_001074586.2  
1428349\_s\_at NP\_034226.1, NP\_001106885.1, NP\_001106886.1  
1417340\_at NP\_075629.2  
, NM\_027115.2 NP\_001038948.1, NP\_081391.1  
1420033\_s\_at, 14 NP\_080667.1  
1435849\_at NP\_082984.1  
1418297\_at, 1418 NP\_036123.3  
1431217\_at NP\_081440.1, NP\_001137227.1  
, NM\_001098636.1 NP\_001028378.1, NP\_001092106.1  
1433605\_at NP\_898967.2, NP\_001120835.1  
1427420\_at NP\_899071.2  
1428599\_at NP\_796235.4  
1416899\_at NP\_033508.1  
NP\_598516.2  
1429610\_a\_at, 14 NP\_081477.1  
1421597\_a\_at NP\_034966.1  
1428859\_at NP\_722478.2  
1424519\_at NP\_955005.2  
1431497\_at  
NP\_001093212.1  
1420446\_at NP\_081295.2  
1422980\_a\_at, 14 NP\_061212.3  
1424819\_a\_at NP\_444424.1  
1417892\_a\_at NP\_071878.2, NP\_001120823.1, NP\_001171275.1  
1422459\_a\_at NP\_036005.1  
1422407\_s\_at, 14 NP\_001123915.1, NP\_001123916.1, NP\_032310.2  
1427890\_a\_at NP\_001165535.1, NP\_001165536.1, NP\_722472.1  
1430017\_at NP\_082326.1  
1418924\_at NP\_080162.3  
  
1421348\_a\_at, 14 NP\_067291.1  
, NM\_026646.3 NP\_001171047.1, NP\_080922.1  
1421397\_a\_at NP\_073145.1  
1415879\_a\_at NP\_080296.3  
  
1428143\_a\_at, 14 NP\_001157161.1, NP\_080078.2  
1427367\_at NP\_001020274.2  
1420921\_at, 1424 NP\_033972.2, NP\_001104519.1, NP\_001104520.1  
1428296\_at NP\_079869.1  
, NM\_053082.3 NP\_001239517.1, NP\_444312.1  
1432006\_at, 1432 NP\_031485.3  
1418714\_at, 1428 NP\_032774.1  
NP\_001186238.1

142256.1  
NP\_034113.1  
1416948\_at NP\_035418.1  
1415931\_at NP\_034644.2, NP\_001116208.1, NP\_001116209.1

1427394\_at  
1422396\_s\_at, 14 NP\_032580.2  
1418802\_at  
1416330\_at NP\_598416.1  
1417649\_at NP\_034006.3, NP\_001155096.1  
NP\_032698.1  
1427330\_at NP\_001239522.1, NP\_038770.3  
1421313\_s\_at, 14 NP\_001239501.1, NP\_031829.2  
1435861\_at NP\_001182015.1, NP\_001028491.1  
1422923\_at NP\_032033.2  
1417419\_at, 1417 NP\_031657.1

NP\_001028550.2  
1418553\_at NP\_598723.3  
NP\_083874.1  
NP\_536709.2  
1416671\_a\_at, 14 NP\_444407.1  
NP\_001019899.1

1432464\_a\_at NP\_001157221.1, NP\_081447.2  
1430612\_at NP\_081261.1  
168886.1  
1418233\_a\_at NP\_079977.3  
1422122\_at NP\_038545.1, NP\_001240668.1, NP\_001240672.1, NP\_001240674.1, NP\_001240675  
NP\_001182187.1  
1436703\_x\_at NP\_598729.1  
1435083\_at NP\_899138.1  
1417670\_at NP\_035722.2  
1428653\_x\_at, 14 NP\_034615.2  
1418777\_at NP\_033164.1  
168887.1  
1416299\_at NP\_035499.1  
1419638\_at, 1419 NP\_034241.2  
105185.1  
1433597\_at, 1433 NP\_789819.2  
NP\_001074681.1

1426348\_at NP\_034061.2  
1424051\_at NP\_034062.3  
NP\_035357.1  
107974.2  
1424311\_at NP\_001177286.1, NP\_081271.2

1428524\_at, 1431 NP\_077210.1  
1416860\_s\_at, 14 NP\_036049.2  
1416065\_a\_at, 14 NP\_598732.2, NP\_001161439.1  
1424482\_at NP\_059098.2, NP\_001106989.1, NP\_001106990.1  
1426707\_at NP\_932148.1  
1421167\_at NP\_056619.1  
1434140\_at NP\_835177.2, NP\_001152957.1, NP\_001152958.1  
1435586\_at, 1435 NP\_848823.2  
NP\_666319.2  
1415880\_a\_at NP\_034814.2  
1423241\_a\_at NP\_033387.1  
1417399\_at NP\_062394.2  
1415850\_at NP\_033051.2  
1425554\_a\_at, 14 NP\_081552.2  
NP\_080200.1  
1436020\_at NP\_862902.1  
1420113\_s\_at, 14 NP\_079832.1  
1428357\_at NP\_776105.1  
, NM\_172751.2 NP\_001032825.1, NP\_766339.2  
1430073\_at, 1431 NP\_083392.1  
1429911\_at NP\_775281.2  
1434287\_at NP\_081068.1  
^\_001113350.1 NP\_795925.1, NP\_001106821.1  
1421563\_at, 1436 NP\_031537.2  
1434187\_at NP\_001230090.1, NP\_898965.1  
1434748\_at NP\_001004140.2  
1424417\_at NP\_081614.1  
, NM\_001146117.1 NP\_001012685.2, NP\_001139589.1  
1434235\_at NP\_035524.2  
107984.2  
1416175\_a\_at NP\_035826.1, NP\_001185927.1  
1417527\_at, 1432 NP\_083781.2, NP\_001116292.1  
1436315\_at NP\_001074618.1  
1419421\_at, 1425 NP\_112435.2, NP\_001104253.1  
  
1431899\_at NP\_083278.1  
1422841\_at NP\_061213.2  
1416594\_at, 1428 NP\_038862.2  
1416094\_at NP\_031430.2, NP\_001257925.1  
1433473\_x\_at NP\_081470.2  
NP\_001074656.1  
1429590\_at, 1429 NP\_955355.1, NP\_796063.3  
1424050\_s\_at, 14 NP\_001073378.1, NP\_034336.2, NP\_001073377.1  
1435499\_at NP\_766600.2  
, NM\_001081269.1 NP\_001001735.1, NP\_001074738.1  
1435376\_at NP\_082378.1

107987.2

1418707\_at NP\_080397.1

1423873\_at NP\_080308.1

NP\_084160.1

1424003\_at, 1424 NP\_083313.1

1435157\_at NP\_997542.1

1431195\_at, 1434 NP\_084241.1

1436026\_at NP\_001094972.1, NP\_001103978.1

1435223\_at NP\_705820.1

1418379\_s\_at NP\_473385.2

1429561\_at NP\_079962.1

1430594\_at NP\_001074282.1, NP\_083699.2

XP\_003945485.1

1417562\_at, 1417 NP\_031944.3

NP\_780345.1

1424360\_at, 1424 NP\_659176.2, NP\_001106200.1, NP\_001186917.1

1426426\_at NP\_080729.1

XP\_003945486.1

NP\_001171060.1

1425074\_at, 1425 NP\_035851.3, NP\_001116294.1, XP\_003946318.1

1424970\_at NP\_690034.1, NP\_001091703.1

1421822\_at, 1421 NP\_059070.1

NP\_001167921.1, NP\_080860.3, NP\_001161393.1, NP\_001161394.1

NP\_001193778.1

1425652\_s\_at, 1425 NP\_062707.1, NP\_001036140.1, NP\_001036139.1

1423552\_at NP\_080885.1

1424039\_at NP\_080708.3

1428834\_at NP\_795907.1

168890.1

1432630\_at, 1433 NP\_780300.2

1418827\_at, 1418 NP\_080343.4

1429005\_at NP\_001074748.1

NP\_001074619.1

1421662\_a\_at NP\_084530.3

1435400\_at NP\_084386.1

1423641\_s\_at, 1423 NP\_035265.1

1419176\_at, 1419 NP\_291038.2

1422648\_at, 1426 NP\_031540.2, NP\_001038205.1

1436501\_at, 1436 NP\_001005863.1, NP\_001005865.2, NP\_001005864.1

1418524\_at, 1418 NP\_076151.2

1416735\_at NP\_062708.1

168892.1

1424562\_a\_at, 1424 NP\_031476.3

1422526\_at, 1423 NP\_032007.2

1418265\_s\_at NP\_032417.3  
1429401\_at, 1436 NP\_001107783.1, NP\_780371.3  
XM\_003946268.1 XP\_003945488.1, XP\_003946317.1  
1419111\_at NP\_075992.2  
XM\_003946270.1 XP\_003945489.1, XP\_003946319.1  
1429320\_at NP\_765995.1  
1417195\_at, 1417 NP\_598552.2  
^\_001161515.1, NI NP\_848903.2, NP\_001154987.1, NP\_001154988.1  
1429178\_at NP\_035987.3, NP\_001139409.1  
XM\_003946271.1 XP\_003945490.1, XP\_003946320.1  
NP\_083977.1  
1420764\_at NP\_033162.1  
1417719\_at NP\_068560.1  
NP\_032278.1  
1425581\_s\_at, 14 NP\_653332.3, NP\_001161453.1  
1430743\_at  
1428804\_at NP\_001171352.1, NP\_001171353.1, NP\_082032.1  
1421270\_at, 1421 NP\_067481.2  
NP\_663570.2  
1427228\_at, 1433 NP\_001074859.1  
1424732\_s\_at NP\_082703.1, NP\_001157219.1  
NP\_001157036.1  
, NM\_172753.5 NP\_001239552.1, NP\_766341.4  
1415904\_at, 1431 NP\_032535.2  
1427518\_at, 1434 NP\_001013397.2  
NP\_001170998.1  
1429473\_at NP\_001035054.1, NP\_001035056.1, NP\_851791.1  
1417475\_at NP\_573487.2  
|\_912305.5 XP\_983345.1, XP\_917398.1  
1430713\_s\_at NP\_075801.1  
1418956\_at NP\_114393.1  
1423992\_at NP\_663571.2, NP\_001106816.1, NP\_001106817.1  
1426250\_s\_at, 14 NP\_083269.4, NP\_001161411.1  
1424381\_at NP\_081757.1  
1430571\_s\_at NP\_598733.2  
1435798\_a\_at, 14 NP\_766343.3, NP\_001161762.1  
105229.1  
1424859\_at NP\_036114.2, NP\_001139625.1  
1435681\_s\_at NP\_001020093.2  
1416384\_a\_at NP\_067513.1  
NP\_619588.1  
1416900\_s\_at NP\_032133.2, NP\_001156754.1  
1419685\_at NP\_109605.2, NP\_001116301.1  
1419527\_at NP\_057894.2  
1434476\_at NP\_001004062.1  
1418476\_at NP\_061297.1

1418702\_a\_at NP\_079853.1  
1416624\_a\_at, 14 NP\_063936.1  
NP\_083642.1  
1416113\_at NP\_034353.2, NP\_001104536.1, NP\_001186560.1  
NP\_031950.2  
1415977\_at NP\_076116.1  
NP\_598533.2  
NP\_694714.1  
1418949\_at NP\_035949.2  
1418329\_at NP\_075706.1  
NP\_034722.1  
l\_979362.2 XP\_917761.3, XP\_984456.2  
NP\_963901.1  
1422589\_at NP\_001159871.1, NP\_033027.1  
1434006\_at NP\_898993.1  
1422476\_at NP\_075552.2  
1418463\_at NP\_032867.2  
1434792\_at  
1435666\_at NP\_955012.2  
1428352\_at NP\_081836.1  
1419617\_at NP\_115773.2  
105222.1  
1428605\_at, 1428 NP\_081240.1  
1422113\_at, 1436 NP\_444478.2  
1428152\_a\_at NP\_084027.1  
  
NP\_766601.2  
1418719\_at NP\_083897.2, NP\_001156514.1  
1418031\_at NP\_056557.2, NP\_001135794.1, NP\_001135795.1  
1423817\_s\_at NP\_080193.1, NP\_001139252.1  
1425191\_at NP\_084141.2  
NP\_034280.2  
NP\_852083.2  
1424073\_at NP\_080912.2  
NP\_766344.2  
1416863\_at NP\_071864.2  
1416349\_at NP\_444392.1  
1429038\_at, 1429 NP\_079876.1  
NP\_001158151.1  
NP\_115933.2  
1422811\_at, 1435 NP\_036107.1  
1417722\_at NP\_079672.1  
NP\_001159685.1  
1433495\_at, 1433 NP\_666323.2  
NP\_001025044.2  
1425750\_a\_at NP\_001177759.1, NP\_034719.2  
NP\_663599.3

1433883\_at NP\_001001491.1  
 1418692\_at NP\_075615.2  
 NP\_032478.2  
 1424765\_at NP\_031970.2, NP\_001116304.1  
 1431255\_at NP\_084058.2, NP\_082776.2  
 1431770\_at NP\_613051.3  
 1434103\_at, 1434 NP\_808434.2  
 NP\_081761.2  
 NP\_795914.3  
 1424355\_a\_at, 14 NP\_033214.2, NP\_001106719.1  
 1417435\_at, 1417 NP\_034817.1  
 1426953\_at NP\_821136.1  
 1431188\_a\_at, 14 NP\_035752.1, NP\_001129731.1  
 NP\_034572.1  
 1415945\_at NP\_032592.2  
 1426027\_a\_at NP\_084389.2  
 1430930\_at  
 NP\_001074709.1  
 1416177\_at NP\_033059.2, NP\_001239018.1  
 1429941\_at, 1436 NP\_084012.1  
 NP\_839998.2  
 1416081\_at NP\_032565.2  
 1431039\_at, 1434 NP\_001074633.1, NP\_001242962.1  
 1416014\_at, 1416 NP\_056566.2  
 1429375\_at, 1429 NP\_081180.1  
 1421426\_at NP\_064655.4  
 1424205\_at, 1424 NP\_444354.2  
 1417693\_a\_at, 14 NP\_067331.2  
 1428592\_s\_at NP\_081830.2  
 XP\_003945679.1  
 NP\_663575.1  
 1433730\_at NP\_848851.3, NP\_001164162.1  
 1416755\_at, 1416 NP\_061278.1  
 1422763\_at NP\_061241.1  
 NP\_038669.1  
 1\_001199593.1 NP\_796236.2, NP\_001186522.1  
 1423643\_at NP\_932099.2  
 1418394\_a\_at NP\_036055.2, NP\_001156501.1, NP\_001156502.1, NP\_001156503.1  
 1428510\_at NP\_851382.2  
 1423714\_at NP\_077146.1  
 NP\_032880.1  
 1434183\_at NP\_001074884.1  
 NP\_898920.2  
 1429953\_at XP\_912460.1, XP\_990693.1, XP\_003086764.1, XP\_003086763.1, XP\_003085411.1, XP  
 NP\_083153.1  
 NP\_918948.1

1436710\_at NP\_766091.2  
1420074\_at NP\_001007572.1  
1417146\_at, 1426 NP\_080699.3  
NP\_080626.1  
1430408\_at NP\_031604.3, NP\_001238988.1, NP\_001238989.1, NP\_001238990.1  
1416442\_at NP\_034629.3  
1420968\_at, 1420 NP\_080064.3  
1436494\_x\_at NP\_001158031.1, NP\_001158032.1, NP\_932137.2  
1423493\_a\_at, 14 NP\_035036.1, NP\_001075450.1, NP\_001075451.1

1436476\_at NP\_957679.1  
1417619\_at NP\_899202.3  
1422964\_at NP\_033036.2  
1417606\_a\_at, 14 NP\_031617.1  
106144.1  
1424907\_a\_at NP\_079924.2  
1418600\_at NP\_034765.2  
1430135\_at NP\_034192.1  
1432255\_at NP\_064329.2  
NP\_659178.1  
NP\_081463.1  
XM\_003946275.1 XP\_003945680.1, XP\_003946324.1  
1418506\_a\_at, 14 NP\_035693.3  
1415899\_at NP\_032442.1  
1419350\_at NP\_573518.2, NP\_001161463.1  
1418292\_at NP\_062626.1  
1428201\_at NP\_081036.2  
1425592\_at, 1425 NP\_663365.3, NP\_001116315.1  
142316.1  
1425857\_at, 1428 NP\_081067.2  
NP\_001182460.1  
1434003\_a\_at, 14 NP\_001034603.1  
1418732\_s\_at NP\_080675.2  
NP\_001001493.1  
1415783\_at, 1415 NP\_075373.1  
1417037\_at NP\_062690.2, NP\_001157263.1  
1434542\_at NP\_776291.1  
1417182\_at, 1417 NP\_062768.1  
1419041\_at, 1435 NP\_082283.2  
1434511\_at NP\_955517.1  
1436655\_at NP\_080103.1, NP\_001162063.1



1420106\_at, 1423 NP\_033198.1

1418154\_at NP\_085040.2

168896.1

1423286\_at, 1423 NP\_062600.2

1419380\_at NP\_201584.2

NP\_083350.2

1433738\_at NP\_001157969.1, NP\_001157970.1, NP\_001157971.1

1420970\_at NP\_031432.2, NP\_001032812.2, NP\_001103226.1, NP\_001032813.1

1436469\_at NP\_036177.1

1417278\_a\_at, 14 NP\_081556.3, NP\_001157132.1

1426299\_at NP\_082116.1

NP\_665856.2

1429201\_at, 1429 NP\_775545.1, NP\_001121641.1, NP\_001121642.1, NP\_001121643.1

NP\_796198.1

1418146\_a\_at, 14 NP\_035380.3

1418517\_at NP\_001240751.1, NP\_032419.2

XM\_003946276.1 XP\_003945681.1, XP\_003946325.1

1416136\_at NP\_032636.1

NP\_035917.2

1417681\_at, 1428 NP\_080899.1

1424291\_at NP\_765998.1

1435626\_a\_at NP\_071726.1

NP\_001028379.2

1424831\_at NP\_705727.1

1415910\_s\_at NP\_598902.1

1428134\_at NP\_080728.1

1416341\_at NP\_033116.2

1423376\_a\_at NP\_444476.1

1427962\_at NP\_001028705.2

1436230\_at NP\_001028640.2, NP\_001139444.1

1432536\_at NP\_955534.1, NP\_082808.1

1422022\_at, 1436 NP\_077787.3

NP\_598715.2

1422597\_at NP\_032635.1

1429302\_at NP\_034104.1

1429149\_at NP\_084474.1

1426615\_s\_at, 14 NP\_663577.1, NP\_001181935.1

1428797\_at, 1428 NP\_001030295.1

1434251\_at NP\_694804.3, NP\_835179.1, NP\_001192155.1

, NM\_001141924.1 NP\_001135394.1, NP\_001135396.1, NP\_001135397.1

1426100\_a\_at NP\_066356.3

1424495\_a\_at, 14 NP\_001032930.1, NP\_083571.1

1425770\_at  
 1434337\_at NP\_705810.2  
 1433925\_at, 1433 NP\_001013398.2  
     NP\_851289.2  
 1423781\_at NP\_659180.1  
 1434973\_at NP\_444300.1  
 , NM\_001252628.1 NP\_001239556.1, NP\_001239557.1, NP\_031689.1  
 1422562\_at NP\_062636.2  
 1428874\_at NP\_081029.1  
     NP\_666325.2  
 A\_001161456.1, NI NP\_071704.3, NP\_001154928.1, NP\_001154929.1, NP\_001154930.1  
 1426521\_at NP\_663579.2  
 1435468\_at NP\_849210.1  
 1429117\_at NP\_001028333.1  
 1418411\_at NP\_056636.2  
 1425786\_a\_at NP\_001242971.1, NP\_001242973.1, NP\_036069.1  
     NP\_084428.1  
 1429756\_at, 1435 NP\_083164.1, NP\_001159866.1  
 1436536\_at NP\_808456.1  
     NP\_683754.1  
 1434489\_at NP\_766348.3  
  
 1435557\_at NP\_808367.2  
 1420070\_a\_at NP\_001074801.1  
     NP\_780369.1  
 1415671\_at NP\_038505.2  
 1421690\_s\_at NP\_031453.1  
 1424239\_at NP\_001074710.2  
  
 106165.1  
 1418330\_at NP\_851839.1  
     NP\_001028492.1  
 1420882\_a\_at NP\_001012656.1  
 A\_001047435.1, NI NP\_062669.2, NP\_001040900.1, NP\_001040901.1  
 1434981\_at NP\_938041.1  
     NP\_081931.1  
     NP\_081745.1  
 1424584\_a\_at, 14 NP\_665823.2  
 1426846\_at NP\_796124.1  
 1416428\_at NP\_067488.1  
     NP\_080808.1  
 1417446\_at NP\_001240733.1, NP\_033221.1  
 1429035\_at NP\_082236.1  
     NP\_079794.1  
 1419976\_s\_at NP\_035031.2  
 1419977\_s\_at, 14 NP\_789808.1  
 1431175\_at

1422341\_s\_at, 14 NP\_598553.1  
1433467\_at NP\_848913.1  
1429596\_at NP\_001007568.1  
1426096\_at NP\_663379.1  
108036.2  
NP\_035894.1  
1431584\_at  
NP\_033994.1  
1435883\_at NP\_766625.1  
1420589\_at NP\_032243.2  
1424028\_at NP\_663387.3  
1423884\_at NP\_035704.2  
1420371\_at, 1420 NP\_033255.1  
1417510\_at NP\_569053.1  
1423617\_at NP\_080789.2  
1420265\_x\_at, 14 NP\_631975.3  
, NM\_025391.2, NP\_001157944.1, NP\_079667.2  
1416490\_at NP\_079734.1  
1421147\_at NP\_001076587.1, NP\_033379.2  
1426029\_a\_at NP\_598718.2, NP\_061293.2  
1432820\_at NP\_034947.1  
1420649\_at, 1420 NP\_031522.2  
1423837\_at, 1423 NP\_082294.1  
1423388\_at, 1434 NP\_033807.2  
1435601\_at NP\_001116066.2  
1427104\_at NP\_780689.3  
1431589\_at NP\_766504.3  
1416231\_at NP\_666328.2  
1415985\_at, 1430 NP\_598714.1  
  
1416993\_at, 1419 NP\_598734.1  
1421890\_at, 1421 NP\_033205.2  
1435544\_at NP\_666329.2  
1429322\_at NP\_082550.1  
1434480\_at NP\_938050.1  
1417087\_at NP\_033175.1  
NP\_666330.2  
1420949\_at, 1420 NP\_573469.1, NP\_001162092.1, NP\_001162093.1, NP\_001162094.1  
1427702\_at NP\_035872.2, NP\_001032754.1  
^\_001198839.1 NP\_034084.2, NP\_001185768.1  
1416742\_at NP\_035931.1  
1419320\_at NP\_064334.1  
NP\_001028493.1  
1423187\_at NP\_080969.2  
^\_001130868.1 NP\_444322.1, NP\_001124340.1  
1419381\_at, 1426 NP\_065609.2  
1435828\_at NP\_001020748.2

1431139\_at, 1432 NP\_083717.1  
1427921\_s\_at, 14 NP\_081120.2  
1427105\_at NP\_082407.1  
1434143\_at, 1434 NP\_808368.3  
NP\_080848.1  
NP\_083962.4  
NP\_001074620.1  
1427980\_at NP\_001156734.1, NP\_083217.1  
1423848\_at NP\_081034.1  
142304.2  
NP\_064350.2  
NP\_780394.1  
1421974\_at NP\_080924.1  
1423483\_s\_at NP\_067416.2  
XM\_895061.4 XP\_003086751.1, XP\_900154.1  
1431898\_at NP\_083704.1  
1425123\_at NP\_666331.1  
NP\_033488.1  
1416545\_at NP\_598728.1  
1426446\_at, 1434 NP\_758490.3, NP\_001157232.1, NP\_001157233.1, NP\_001157234.1  
1429653\_at NP\_941073.2, NP\_001139368.1, NP\_001139369.1  
1434952\_at NP\_035056.1  
NP\_034071.1  
^\_001166482.1 NP\_766349.1, NP\_001159954.1  
1416693\_at NP\_038547.2  
1423027\_at NP\_032050.2  
1418168\_at, 1418 NP\_543131.1  
1424887\_at NP\_663580.2  
1418326\_at NP\_035534.2  
NP\_001028657.1  
1419525\_at NP\_031634.2  
^\_001110100.1 NP\_058092.2, NP\_001103570.1  
XM\_111398.8 XP\_001001798.3, XP\_111398.7  
1423603\_at NP\_033595.1  
1418006\_at NP\_001025165.1, NP\_001025164.1  
NP\_001028314.1  
1428350\_at NP\_722470.2  
NP\_001032375.1  
1424143\_a\_at, 14 NP\_080290.3  
1423801\_a\_at NP\_033828.2  
^\_001193645.1 NP\_057931.3, NP\_001180574.1  
1418582\_at NP\_033954.2, NP\_001103343.1, NP\_796263.1  
1435778\_at NP\_001074848.2  
1429766\_at, 1429767\_at  
1427166\_a\_at NP\_694816.3  
NP\_058018.2

NP\_663581.1

1435365\_at NP\_796253.2

1433975\_at NP\_919428.1, NP\_919426.2

1428338\_at NP\_084452.2

1432197\_at

1426828\_at, 1430 NP\_082476.1

1418312\_at, 1418 NP\_065243.2

1425118\_at NP\_758491.1

1424053\_a\_at NP\_080080.2, NP\_001032966.1, NP\_001032967.1

1418336\_at NP\_473411.2

NP\_598716.1

1424796\_at NP\_082812.1

1423787\_at, 1423 NP\_758492.2

1416402\_at, 1416 NP\_062425.1

1425610\_s\_at, 14 NP\_644678.2

NP\_741958.1

1416932\_at NP\_084022.2

1428910\_at NP\_780358.3

NP\_663582.2

NP\_941034.2

1434870\_at NP\_079891.2

1417456\_at NP\_034452.3

1436048\_at NP\_932771.1

NP\_001104611.1

1423785\_at NP\_444437.2

1423395\_at, 1430 NP\_058605.1

XM\_003946280.1 XP\_003945686.1, XP\_003946329.1

1435116\_at NP\_083184.1

1425807\_at NP\_663583.2

NP\_780643.2

1429061\_at, 1435 NP\_778152.1

NP\_001153379.1

1433632\_at, 1433 NP\_001158070.1

1420391\_at, 1434 NP\_001013599.1, NP\_001013598.1, NP\_296369.2, NP\_001116322.1

1418084\_at NP\_032763.2

1429579\_at NP\_001028494.1

1429250\_at NP\_084127.2

1432271\_a\_at, 14 NP\_084051.1

1417222\_a\_at NP\_598500.1

1416487\_a\_at NP\_001164618.1, NP\_033560.1

1421444\_at NP\_032855.2

NP\_082099.1

1428968\_at NP\_080941.3

1426985\_s\_at, 14 NP\_789806.1

NP\_084537.2  
1426540\_at, 1426 NP\_082289.2  
1\_003946284.1 NP\_775609.2, XP\_003946333.1  
1423133\_at NP\_075642.1  
1423415\_at NP\_034417.1  
1416379\_at NP\_062355.2  
NP\_001158269.1  
1416607\_at NP\_001186413.1, NP\_001186414.1, NP\_598493.1  
1430147\_a\_at, 14 NP\_083524.2, NP\_081537.1  
1436652\_at NP\_795950.2  
NP\_758493.2  
A\_001110309.1 NP\_666333.1, NP\_001103779.1  
1431206\_at, 1434 NP\_001075954.1, NP\_001128491.1  
A\_001002846.1 NP\_038939.2, NP\_001002846.1  
1416848\_at NP\_079677.1  
1416228\_at NP\_075860.1  
1435193\_at NP\_783618.1  
1424785\_at NP\_660136.1  
1423703\_at NP\_663585.2  
1417718\_at NP\_058572.2  
1422946\_a\_at, 14 NP\_001186360.2, NP\_034196.5, NP\_001186361.1, NP\_001186362.1  
1428176\_at NP\_034463.2  
1416510\_at NP\_075656.2  
1424067\_at NP\_034623.1  
1422930\_at NP\_076381.1  
1418619\_at NP\_032345.2  
  
XM\_003946286.1 XP\_003945492.1, XP\_003946335.1  
NP\_001096638.1  
1427111\_s\_at, 1430293\_a\_at  
NP\_001034913.1  
1427110\_at NP\_082187.1  
1421535\_a\_at NP\_899668.1, NP\_062772.3  
105237.1  
A\_001110305.1, NP\_057888.1, NP\_001103775.1, NP\_001103776.1, NP\_001103777.1  
NP\_444420.1  
1422546\_at NP\_034691.2, NP\_001036172.1, NP\_001036173.1, NP\_001036174.1  
  
NP\_068688.2  
1423629\_at, 1425 NP\_001034609.1, NP\_001240822.1, NP\_001240823.1, NP\_031897.2  
  
1426804\_at, 1426 NP\_001167549.1, NP\_001167550.1, NP\_035547.2  
1421821\_at, 1431 NP\_001239587.1, NP\_001239588.1, NP\_034830.2  
1425991\_a\_at NP\_663586.3  
1427240\_at, 1430 NP\_796004.2  
NP\_080146.1  
1423344\_at NP\_034279.3

1435481\_at NP\_796292.1  
\_040407.1  
1417080\_a\_at NP\_001240826.1, NP\_001240827.1, NP\_036159.1  
1417917\_at NP\_034052.3  
1423820\_at NP\_740747.1  
1431609\_a\_at NP\_031414.1, NP\_001095874.1, NP\_001095875.1  
1433543\_at NP\_082666.2  
1418277\_at NP\_061209.1  
1427341\_at NP\_848502.1, NP\_851833.2  
1415981\_at, 1415 NP\_065611.1  
^\_001205367.1 NP\_033989.2, NP\_001192296.1  
1428246\_at, 1428 NP\_821170.1  
1430782\_at, 1434 NP\_835214.2  
1427078\_at NP\_083150.1  
XP\_003945494.1  
1427271\_at, 1427 NP\_766353.2, NP\_001108602.1  
1418076\_at NP\_035306.2  
1421887\_a\_at, 14 NP\_033821.1, NP\_001095925.1, NP\_001095926.1  
1422027\_a\_at, 14 NP\_001033731.1, NP\_035938.2  
1425668\_a\_at NP\_033204.2  
  
1424080\_at NP\_081306.1  
NP\_758495.1  
1423670\_a\_at, 14 NP\_080406.1  
1432435\_s\_at NP\_919233.1, NP\_780620.1  
1418491\_a\_at, 14 NP\_075781.3  
1431315\_at, 1433 NP\_084038.1  
  
1420031\_at, 1420 NP\_031717.2  
1423033\_at NP\_032434.3  
1416555\_at NP\_031941.1, NP\_001186423.1  
1428017\_at, 1433 NP\_683752.2, NP\_001025009.1  
1429023\_at, 1434 NP\_780398.2  
1426232\_at NP\_666334.2  
NP\_666826.1  
NP\_109638.2  
1435229\_at, 1435 NP\_766356.1  
NP\_598494.2  
1420622\_a\_at, 14 NP\_112442.2  
  
1429475\_at, 1435 NP\_789830.1  
1423902\_s\_at NP\_081420.2  
168902.1  
NP\_001030035.1  
1424086\_at NP\_848759.1

NP\_067399.2  
1423135\_at NP\_033408.1  
1424762\_at NP\_001035721.1, NP\_001035722.1, NP\_663588.2, NP\_001177242.1, NP\_001177248  
, NM\_147126.3 NP\_001177243.1, NP\_667337.1  
1423650\_at NP\_717095.2  
142329.1  
1416357\_a\_at NP\_075548.2  
1434829\_at NP\_031645.2  
NP\_001074838.2  
1424437\_s\_at, 14 NP\_620405.3  
NP\_751894.2  
1428095\_a\_at NP\_082185.2  
NP\_031901.2  
1416746\_at NP\_034566.1  
1426475\_at NP\_038579.2, NP\_001103721.1  
1423290\_at, 1423 NP\_067370.3  
1417042\_at NP\_032089.2  
1415674\_a\_at, 14 NP\_068561.1  
1430978\_at NP\_077228.1  
NP\_958760.2  
  
1424598\_at, 1434 NP\_031867.1, NP\_851841.2, NP\_001104296.1  
1424467\_at, 1424 NP\_705765.3  
1423743\_at, 1436 NP\_666097.3  
1417474\_at NP\_076320.2  
1436644\_x\_at NP\_082141.1  
1418696\_at NP\_620401.1  
1427283\_at NP\_001074518.1  
1431488\_at  
1427392\_at, 1427 NP\_001074739.1  
1427273\_at, 1427 NP\_848824.1  
1417180\_at NP\_032820.2  
1426940\_at NP\_758461.1  
1422791\_at, 1422 NP\_032801.2  
NP\_081774.3  
1417610\_at NP\_536682.2  
1419281\_a\_at, 14 NP\_035882.1  
NP\_666112.1  
1417376\_a\_at, 14 NP\_997558.2, NP\_061240.3, NP\_997559.1, NP\_001020771.1  
1433982\_at NP\_780691.2  
1435211\_at NP\_766358.1  
1421966\_at, 1425 NP\_035005.2, NP\_001074914.1, NP\_001106675.1  
NP\_035350.1  
1421221\_at NP\_573480.1  
NP\_997614.2, NP\_001128374.1  
1429936\_at NP\_082576.1  
1426264\_at, 1426 NP\_663589.3



1425256\_a\_at, 14 NP\_835219.1  
1417211\_a\_at NP\_075972.2  
NP\_941077.2  
1418844\_at, 1430 NP\_598742.1  
1428265\_at NP\_001029257.1, NP\_082890.2  
1419871\_at NP\_848825.2  
NP\_001182610.1  
1427522\_at, 1429 NP\_780744.2  
NP\_032022.1  
1416179\_a\_at, 14 NP\_033067.2, NP\_001098086.1, NP\_001098087.1  
NP\_001156393.1  
NP\_789816.2  
NP\_997610.1  
1421205\_at, 1428 NP\_031525.2  
NP\_001074621.1  
1424182\_at, 1424 NP\_659033.1  
1428287\_at NP\_082083.2, NP\_001155090.1  
NP\_001028707.1  
1428749\_at NP\_766359.2  
1418591\_at, 1418 NP\_067397.1  
1433527\_at NP\_073146.2  
1435691\_at NP\_796325.2  
1427613\_at NP\_660264.1  
NP\_036096.1  
NP\_660111.2  
1425849\_at NP\_683746.1  
1433664\_at NP\_850931.2  
1426592\_a\_at, 14 NP\_082325.2  
1423972\_at NP\_663590.3  
1418676\_at NP\_081673.2  
1435930\_at NP\_001074810.1  
1422449\_s\_at NP\_036122.2  
1416009\_at NP\_062767.3  
1428118\_at NP\_851419.1  
1423341\_at NP\_620570.2  
1434361\_at NP\_780692.2  
1416210\_at NP\_598737.1  
NP\_062625.2  
  
1419101\_at, 1419 NP\_035508.2, NP\_001103820.1, NP\_001103821.1  
105263.2  
1419900\_at  
1423687\_a\_at, 14 NP\_082912.1  
NP\_001014420.2  
1429758\_at NP\_083096.1  
NP\_598743.1  
1415933\_a\_at NP\_031773.2

1\_001166364.1 NP\_780482.1, NP\_001159836.1  
 NP\_080113.1  
 1416611\_at NP\_073724.1  
 1431112\_at NP\_082171.1  
 1424606\_at NP\_666335.1  
 1423518\_at NP\_031809.2  
 1423849\_a\_at NP\_031739.3  
 1\_001122873.1 NP\_081362.2, NP\_001116345.1  
 1422040\_at NP\_035482.1  
 1422723\_at NP\_033317.2, NP\_001155947.1, NP\_001155948.1, NP\_001155951.1  
 1418450\_at NP\_036173.1, NP\_001182360.1  
 1434421\_at NP\_001155007.1, NP\_001155008.1, NP\_001155009.1, NP\_001155010.1, NP\_001155011.1  
 1436063\_at NP\_034859.2  
 NP\_795895.1  
 1417599\_at NP\_598744.1  
 NP\_001074661.1  
 1434931\_at NP\_032710.2, NP\_001036217.1  
 1427188\_at, 1427 NP\_064311.2  
 NP\_034551.2  
 1428931\_a\_at NP\_001192168.1, NP\_084198.2  
 1417308\_at NP\_001240812.1, NP\_035229.2  
 142336.1  
 1419654\_at, 1419 NP\_001077397.1, NP\_033415.2, NP\_001077396.1  
 NP\_061341.1  
 NP\_077207.3  
 NP\_083024.1  
 1421918\_at, 1434 NP\_033802.2  
 1418323\_at, 1418 NP\_034323.1  
 1422581\_at NP\_062637.2  
 1\_001163755.1, NP\_766034.2, NP\_001157227.1, NP\_001157229.1, NP\_001157230.1  
 NP\_084344.1  
 1424016\_at NP\_080133.1  
 NP\_058049.3  
 1422771\_at NP\_032568.3  
 1416757\_at NP\_080783.3  
 1425183\_a\_at NP\_077174.1  
 1427999\_at NP\_899139.2  
 1416351\_at NP\_032953.1  
 1426612\_at NP\_079648.1  
 , NM\_001177784.1 NP\_001001295.2, NP\_001171255.1, NP\_766107.1  
 1434549\_at NP\_059078.2  
 1435975\_at NP\_001156389.1  
 1433706\_a\_at NP\_067320.2  
 1416473\_a\_at, 14 NP\_064427.2

1423496\_a\_at NP\_033014.1  
1426950\_at NP\_803411.3  
1423447\_at NP\_001037854.1, NP\_035932.2  
1416377\_at NP\_057897.2  
1430176\_at NP\_083250.1  
1428067\_at NP\_001028330.2, NP\_001156395.1  
1424908\_at NP\_081410.2  
1427103\_at NP\_694759.1  
NP\_766041.1  
NP\_082306.2  
1422857\_at, 1422 NP\_001164378.1, NP\_062771.2  
1419152\_at, 1419 NP\_080791.2  
1428806\_at NP\_775277.2  
NP\_035279.2  
NP\_001020783.1  
1425378\_at, 1434 NP\_663592.3  
1425022\_at, 1425 NP\_659186.1  
1423254\_x\_at, 14 NP\_080743.1  
NP\_109642.1  
1423049\_a\_at, 14 NP\_077745.2, NP\_001157720.1, NP\_001157721.1, NP\_001157722.1, NP\_001157723  
NP\_001156615.1  
NP\_796158.2  
1420583\_a\_at, 14 NP\_038674.1  
105287.1  
  
1419091\_a\_at NP\_031611.1  
  
1420705\_at NP\_071773.2  
  
1422490\_at, 1422 NP\_001008239.1, NP\_058067.2  
NP\_001034608.1  
NP\_031656.2  
1423304\_a\_at NP\_291082.1  
1424452\_at, 1429 NP\_080613.1, NP\_079966.2  
NP\_766360.2  
1428103\_at NP\_031425.2  
1422789\_at NP\_033048.2  
1431390\_a\_at NP\_848717.1, NP\_001158265.1  
1421158\_at, 1421 NP\_080875.3  
1421908\_a\_at, 14 NP\_035674.2, NP\_001240791.1, NP\_001240792.1, NP\_001240793.1, NP\_001240794  
1430099\_at  
1434521\_at NP\_001028708.1  
1421955\_a\_at NP\_035020.2  
NP\_780694.3  
1431091\_at NP\_082392.1  
1429377\_at NP\_080166.1  
1424377\_at NP\_941011.1

1421447\_at NP\_032288.1

1419754\_at, 1431 NP\_034994.2

1424933\_at NP\_001074791.1

1422208\_a\_at NP\_034443.1, NP\_619733.1

1419168\_at, 1419 NP\_081694.1, NP\_056621.4

1432243\_a\_at

1423088\_at, 1423 NP\_058659.1

1430153\_at, 1431 NP\_001033799.1, NP\_057920.2

1428626\_at NP\_081585.2

^\_001146048.1 NP\_766116.3, NP\_001139520.1

105299.2

1424296\_at NP\_034425.1

1415840\_at NP\_599016.2

1417480\_at, 1432 NP\_076094.2, NP\_001074959.1

^\_001163780.1 NP\_064371.2, NP\_001157252.1

NP\_775562.2

1416991\_at, 1431 NP\_080934.2

1424635\_at NP\_034236.2

1429116\_at NP\_766361.1

1427984\_at NP\_666115.2

1422288\_at NP\_034612.1

\_040394.1, NR\_040395.1, NR\_040396.1, NR\_040397.1

1422683\_at, 1431 NP\_075362.3, NP\_001161712.1

1423432\_at, 1425 NP\_001074685.1

1431777\_a\_at, 14 NP\_080398.1, NP\_778249.1

1434109\_at, 1434 NP\_766095.1

1424306\_at NP\_683743.2

^\_001110265.1 NP\_033471.2, NP\_001103735.1

1434282\_at NP\_001074751.1

035460.3

1423310\_at, 1423 NP\_001158264.1, NP\_035757.2

NP\_081670.1

1435295\_at NP\_796182.2

1428228\_at NP\_082628.3, NP\_001157218.1

1428963\_at NP\_081376.2, NP\_001139440.1, NP\_001139441.1

1416632\_at, 1430 NP\_032641.2, NP\_001185862.1

1416688\_at NP\_038697.1

NP\_955020.2

1422974\_at, 1428 NP\_035981.1

NP\_766514.2

1422768\_at, 1422 NP\_062770.1, NP\_062640.2

NP\_001003911.2

1433626\_at NP\_848826.1

1416686\_at, 1416 NP\_036091.2, NP\_001136388.1  
1433581\_at, 1433 NP\_001028317.2  
1422758\_at NP\_061233.2  
1434300\_at NP\_080752.2, NP\_001108449.1  
NP\_082809.2  
1427197\_at NP\_063917.1  
1426414\_a\_at NP\_035409.1  
1422785\_at NP\_444498.2  
1429390\_at, 1429 NP\_700469.1  
NP\_660116.1  
105308.1  
1419656\_at, 1419 NP\_620095.1  
1424899\_at, 1432 NP\_653116.1  
1416595\_at NP\_079761.1  
NP\_036150.1  
NP\_001231691.1  
1422653\_at, 1430 NP\_076362.2  
NP\_808443.2  
NP\_032650.1  
1429535\_at, 1434 NP\_083044.2, NP\_001159610.1  
NP\_113580.2  
NP\_001070892.1  
1436354\_at NP\_082534.2  
1427609\_at NP\_035570.1  
NP\_001094953.1  
1421939\_a\_at, 14 NP\_033308.2  
NP\_080111.1  
1429108\_at, 1429 NP\_001093921.1  
, NM\_172144.3 NP\_001154834.1, NP\_742156.2  
NP\_062738.2  
1426388\_s\_at NP\_038677.3, NP\_001036072.1  
NP\_795953.2  
1415704\_a\_at NP\_780774.1, NP\_787027.1, NP\_001127898.1, NP\_001127899.1  
1435247\_at NP\_079968.2  
1433545\_s\_at NP\_780533.2  
1434038\_at NP\_001156498.1  
1421204\_a\_at NP\_083661.2  
1431196\_at, 1434 NP\_001240760.1, NP\_001240763.1, NP\_778190.3, NP\_001240765.1  
NP\_084172.1  
1432202\_a\_at NP\_081630.2  
1427416\_x\_at NP\_703189.3  
NP\_033108.1  
1419173\_at NP\_079647.1  
1425699\_a\_at NP\_001103741.1, NP\_001103742.1, NP\_666031.2  
1433658\_x\_at NP\_067542.3

NP\_001153124.1  
1426210\_x\_at NP\_663594.2  
NP\_663595.1  
1425068\_a\_at NP\_001075123.1, NP\_035703.2  
1423485\_at NP\_109655.2  
1434609\_at NP\_001015507.1  
NP\_780611.3  
1428112\_at NP\_083379.2  
1428852\_at NP\_700462.2  
1426185\_at NP\_064659.2, NP\_001167518.1, NP\_001167519.1, NP\_001167520.1, NP\_001167521  
NP\_062678.1  
1418482\_at NP\_062694.1  
1417046\_at NP\_061367.1  
1422750\_a\_at NP\_444483.2  
, NM\_019713.4 NP\_001230677.1, NP\_062687.1  
168908.1  
1417593\_at NP\_062716.1  
NP\_034619.2  
NP\_032343.2  
1419449\_a\_at, 14 NP\_032164.2  
  
1420508\_at, 1425 NP\_035479.2  
NP\_683732.1  
1417213\_a\_at NP\_083445.1, NP\_035381.2  
1428898\_at NP\_082645.1  
1420461\_at NP\_033100.2  
1426970\_a\_at, 14 NP\_076227.1  
NP\_080873.2  
1431780\_at XP\_003688917.1, XP\_003689486.1  
1422968\_at, 1422 NP\_038813.2  
1434611\_at NP\_115932.1  
1418267\_at NP\_032269.3  
1426030\_a\_at NP\_666338.2  
1422023\_at, 1436 NP\_031593.2  
1423872\_a\_at, 14 NP\_034147.1  
NP\_058082.2  
NP\_032186.2  
NP\_035808.2  
NP\_001004192.1  
1428221\_at NP\_084351.1  
1417955\_at NP\_598505.1  
1416513\_at NP\_032509.2  
1424656\_s\_at NP\_001161843.1, NP\_001161844.1, NP\_082080.3, NP\_001161845.1, NP\_663382.2  
1423712\_a\_at NP\_598555.2, NP\_001161742.1  
1426289\_at NP\_780352.2, NP\_001107591.1  
NP\_035960.2  
1418185\_at NP\_075736.1

1423894\_a\_at NP\_080654.3  
1415770\_at NP\_113569.1  
1428211\_at NP\_083220.3  
1418523\_at NP\_035920.1  
1423108\_at, 1423 NP\_065266.1  
1427414\_at, 1428 NP\_032950.1  
1418975\_at NP\_109654.2  
1425067\_at NP\_536685.2  
1416275\_at NP\_599252.2  
1428782\_a\_at NP\_079683.2  
NP\_079965.2  
XP\_981851.1  
1435254\_at, 1435 NP\_766363.2  
1417131\_at, 1417 NP\_031684.3  
1416140\_a\_at NP\_001239611.1, NP\_001239612.1, NP\_579925.1  
142368.1  
1423416\_at, 1423 NP\_033237.2  
^\_001166273.1 NP\_038912.3, NP\_001159745.1  
1433520\_at NP\_001001144.2, NP\_001096632.1  
1427128\_at NP\_001074512.1  
1420395\_a\_at NP\_034758.2, NP\_001157041.1  
1428555\_at NP\_001074809.2  
1429127\_at NP\_080288.1  
NP\_899099.2  
1417092\_at NP\_001077405.1, NP\_035329.2, NP\_001077404.1  
1429646\_at NP\_898926.2  
NP\_666339.2  
NP\_666372.1  
1427533\_at, 1433 NP\_666340.3, NP\_001139531.1, NP\_001139532.1  
1436378\_at, 1436 NP\_082018.1, NP\_001158310.1  
1429276\_at NP\_001158131.1  
1415937\_s\_at, 14 NP\_001158149.1, NP\_001158150.1, NP\_035182.2  
1424836\_a\_at, 14 NP\_083909.2, NP\_001075429.1, NP\_001107819.1  
^\_001083319.1 NP\_038727.1, NP\_001076788.1  
NP\_064306.2  
1424947\_at NP\_666341.1  
, NM\_133978.2 NP\_001239408.1, NP\_598739.1  
1427964\_at NP\_081570.1  
NP\_780589.3  
1415716\_a\_at NP\_001177187.1  
1426342\_at, 1426 NP\_077184.2  
1422019\_at, 1425 NP\_033397.3, NP\_083851.3  
1431822\_a\_at NP\_038755.1, NP\_001041611.1  
1420860\_at NP\_598482.2, NP\_001106986.1  
1422510\_at NP\_598471.3

1426933\_at NP\_598746.2  
1419272\_at NP\_034981.1  
1416946\_a\_at, 14 NP\_570934.1  
1426706\_s\_at NP\_001028381.1, NP\_001186497.1  
1419140\_at NP\_031423.1  
1436022\_at NP\_001165607.1, NP\_766044.1  
1426723\_at NP\_080512.1  
1434350\_at NP\_695019.1  
1424418\_at NP\_659042.1  
NP\_035159.3  
  
105330.1  
1428272\_at NP\_081168.1  
  
1420811\_a\_at, 14 NP\_031640.1, NP\_001159374.1  
1436102\_at NP\_848792.2, NP\_001158034.1  
1427955\_a\_at NP\_081070.1  
1423248\_at, 1423 NP\_035048.3  
  
1435360\_at NP\_001160116.1  
1431043\_at NP\_082478.1  
1424553\_at NP\_083371.2  
1416480\_a\_at, 14 NP\_062788.1  
1417565\_at, 1417 NP\_080455.1  
NP\_033570.2  
1418048\_at NP\_079695.2  
1431718\_at NP\_034750.1  
1421127\_at NP\_079615.1, NP\_001158295.1  
1423646\_at, 1423 NP\_081193.2  
NP\_001074657.1  
1428074\_at NP\_001002267.2  
1422730\_at, 1422 NP\_038888.2  
1416500\_at NP\_109617.1  
1417170\_at, 1428 NP\_201579.1  
1431228\_s\_at  
XM\_003086776.1 XP\_003086819.1, XP\_003086824.1, XP\_003086823.1, XP\_003086821.1, XP\_003086820.1  
1420295\_x\_at, 14 NP\_057900.3, NP\_001230691.1  
1420734\_at NP\_613071.2  
1430639\_at  
1420765\_a\_at NP\_473380.1, NP\_001186276.1, NP\_001186277.1  
1428773\_s\_at, 14 NP\_083786.2, NP\_778211.2, NP\_778209.2, NP\_001161793.1, NP\_778210.2  
1420922\_at, 1420 NP\_033507.2  
1416467\_at, 1423 NP\_034158.1  
1423772\_x\_at, 14 NP\_031477.1  
NP\_084227.1  
1417609\_at NP\_062642.1  
1420938\_at, 1420 NP\_056634.3, NP\_001070670.1



1426832\_at NP\_766367.1  
1416155\_at NP\_032279.1  
NP\_067340.2  
1417412\_at NP\_032004.2  
1430226\_at NP\_898917.2  
1418397\_at NP\_113682.2, NP\_001153701.1  
, NM\_010788.3 NP\_001075448.1, NP\_034918.1  
NP\_061264.1  
NP\_034403.1  
1419516\_at NP\_613073.2  
1434643\_at, 1434 NP\_065626.1  
1420926\_at NP\_031518.2  
1418109\_at NP\_032205.2  
1418285\_at, 1418 NP\_034240.1  
NP\_001157082.1  
1416276\_a\_at, 14 NP\_033120.1  
1419968\_at, 1419 NP\_001070822.2  
XP\_003945661.1  
1415703\_at, 1424 NP\_067498.4  
1431592\_a\_at, 14 NP\_001129199.1, NP\_001129200.1, NP\_067364.2  
NP\_001074521.1  
1415775\_at NP\_033057.3  
1423091\_a\_at, 14 NP\_001171426.1, NP\_001171427.1, NP\_075611.1, NP\_001171428.1, NP\_001171429  
NP\_034962.2





.1, NP\_001070875.1

















322.1, NP\_035491.1



.1, NP\_001139596.1









.1, NP\_001073603.1







.1

1, XP\_003945937.1

L

.1, NP\_001160129.1



.1, NP\_001243449.1





065.1, NP\_853613.1, NP\_001160066.1, NP\_001160067.1, NP\_001160068.1

.1, NP\_665701.1

.1







.1, NP\_001186133.1, NP\_001186134.1



.1, NP\_001123926.1







.1

.1



.1































.1, NP\_001034161.1, NP\_001034165.1

NP\_001229534.1



.1, NP\_001239595.1







.1

NP\_958791.2, NP\_958792.2, NP\_958793.2, NP\_958795.2, NP\_958796.2, NP\_001157675.1, NP\_958789.3, NP\_95

NP\_001104300.1





















.1, NP\_001153092.1





.1, NP\_001157323.1, NP\_001157324.1, NP\_001157325.1

.1, NP\_001156923.1, NP\_001156925.1

'\_003085205.1

015.1, NP\_001160016.1, NP\_001160017.1, NP\_001160018.1, NP\_001160007.1, NP\_001160008.1, NP\_00116000



51.1

.1

.1, NP\_001103738.1



.1



.1, NP\_001104324.1, NP\_001104325.1, NP\_001104326.1, NP\_001104327.1, NP\_001104328.1, NP\_001104329.1

.1, NP\_001239422.1







896.1, NP\_080137.2  
NP\_001157584.1

.1, NP\_001020427.1, NP\_001020429.1, NP\_001020430.1

.1, NP\_001161360.1, NP\_001161361.1

.1











.1, NP\_001157766.1, NP\_001157767.1

.1, NP\_001136394.1, NP\_001136395.1, NP\_001136396.1

.1, NP\_001171227.1, NP\_001171228.1, NP\_001171229.1

.1

.1

.1

.1



.1

.1, NP\_001185805.1, NP\_001185806.1, NP\_001185807.1



.1

.1, NP\_001153042.1





.1, NP\_001171308.1, NP\_001171309.1, NP\_001171310.1, NP\_001171311.1

.3



.1



439.2, NP\_001070978.1, NP\_963910.1

.1, NP\_001171181.1

140.1

.1, NP\_001254643.1, NP\_001254644.1

.1



.1, NP\_001240642.1

.1, NP\_001182429.1















.1, NP\_001240717.1



.1, NP\_001008796.1, NP\_001008797.1, NP\_001008798.1, NP\_001008792.1









.1





.1









.1

.1, NP\_001171171.1



.1

.2









.1



.1



702.1, NP\_035068.3

.2, NP\_001073373.2

.1, NP\_001171031.1







.1, NP\_001159903.1, NP\_001159904.1

.1, NP\_001242927.1, NP\_001242928.1, NP\_001242929.1, NP\_001242930.1, NP\_001242931.1

.1













1



.1

.1



.1, NP\_001239453.1













.1, NP\_001240676.1, NP\_001240666.1































.1



011.1, NP\_796167.2, NP\_001155012.1, NP\_001155013.1

.1, NP\_001157724.1, NP\_001157725.1, NP\_001157726.1, NP\_001157727.1, NP\_001157728.1

.1





.1





25.1, XP\_001472426.3

.1, NP\_001171430.1, NP\_001171431.1, NP\_001171432.1, NP\_001171433.1



















































































































97.1, NP\_001240298.1, NP\_001240299.1, NP\_001240300.1, NP\_034740.2, NP\_001240301.1, NP















8794.2, NP\_958790.2, NP\_958788.2

































09.1, NP\_001020598.1, NP\_057869.2, NP\_001034445.1













↓

**Supporting Information Table S4.** ARID4B directly regulated target genes identified by both RNA-Seq

|               | RNA-Seq | CHIP-Seq                  |
|---------------|---------|---------------------------|
| Gene          | log2Fc  | Interval Dists to Start   |
| Asic4         | -3.48   | 25586, 27122, 28578       |
| Elovl2        | -2.99   | 403                       |
| 1110032F04Rik | -2.9    | 398                       |
| Srcap         | -2.89   | 657                       |
| Cabp1         | -2.81   | 27486                     |
| Nkx2-1        | -2.57   | 3468                      |
| Hs6st3        | -2.23   | -281                      |
| Sfrp4         | -2.19   | 313                       |
| Mafa          | -2.18   | 666                       |
| Dnaaf1        | -2.16   | -419, 29789               |
| Kazald1       | -2.08   | -1371, 725, 2581, 3749    |
| Hsd17b1       | -2.06   | -8043, 1541, 4565         |
| Bcl11b        | -1.95   | 22774                     |
| Fgf18         | -1.9    | -248                      |
| Ankrd63       | -1.87   | 7451, 667                 |
| Fgf22         | -1.86   | 11569                     |
| Erich5        | -1.79   |                           |
| Grin2c        | -1.74   | 17403                     |
| Amh           | -1.71   | 2016                      |
| 4921507P07Rik | -1.67   | -50                       |
| Cbln1         | -1.63   | 3392, 2032, 112           |
| Dnmt3l        | -1.62   | 27345                     |
| Hhip          | -1.59   | -8                        |
| Elavl4        | -1.56   | 215                       |
| St8sia1       | -1.55   | 249                       |
| Gm11744       | -1.53   | -3284                     |
| Kl            | -1.51   | 449                       |
| Gsg1l         | -1.51   | 363                       |
| Rmdn2         | -1.47   | 428                       |
| Ppp1r16b      | -1.46   | 1267, 101555              |
| Ankmy1        | -1.42   | -4294, -8454              |
| Sim2          | -1.38   | -300                      |
| Tef           | -1.36   | 8831                      |
| Igdcc3        | -1.34   | 475                       |
| Hoxd1         | -1.32   | 60                        |
| Prkcb         | -1.31   | 379                       |
| Doc2b         | -1.29   | 1049                      |
| Shisa2        | -1.25   | 863                       |
| Greb1         | -1.24   | 374, -10298               |
| Exoc3l2       | -1.24   | -5219, 6269, 11197, 26301 |
| Mylk2         | -1.23   | 21640                     |
| Xkr5          | -1.23   | 205                       |

|               |       |                            |
|---------------|-------|----------------------------|
| Scrn2         | -1.22 | -7696                      |
| Bahcc1        | -1.22 | -1811, 1933, 3789, 21613   |
| Perm1         | -1.21 |                            |
| Cln3          | -1.19 | 18072                      |
| Kcna3         | -1.18 | 446                        |
| Zfyve28       | -1.16 | 1012                       |
| Cebpa         | -1.16 | 1091                       |
| P4ha3         | -1.16 | 192                        |
| Itpka         | -1.15 | 415, 2399                  |
| Ajap1         | -1.15 | 782                        |
| Chrn4         | -1.15 | 22048                      |
| Tmem206       | -1.14 | 382, 1587                  |
| Trim62        | -1.14 | 276                        |
| Scrn1         | -1.14 | 190                        |
| Dll3          | -1.14 | 7193, -10055               |
| Cfi           | -1.13 | -5667                      |
| Tgfa          | -1.13 | 397                        |
| Fam83f        | -1.12 | -295                       |
| Dhh           | -1.12 | 4396, 460                  |
| Sult2b1       | -1.12 |                            |
| Reep6         | -1.1  | -8438, -6865, 127, 11663   |
| Kbtbd13       | -1.1  | -6972                      |
| Mfsd7c        | -1.09 | 325                        |
| Inhbb         | -1.08 | 4648, 1640, 712            |
| C530008M17Rik | -1.08 |                            |
| Nkx2-6        | -1.04 | 2854                       |
| Hspa1l        | -1.04 | 9345                       |
| Prkce         | -1.04 | -553                       |
| Acss1         | -1.04 | 59824, 176                 |
| Gdnf          | -1.03 | -275                       |
| Fam222a       | -1.02 | -667                       |
| Hist1h1b      | -1.01 | 218                        |
| Ldoc1l        | -1.01 | 191                        |
| Reep1         | -1    | 511                        |
| Cage1         | -0.96 | -247                       |
| Rab25         | -0.92 | 16567, 15447, 11650, -5929 |
| Inha          | -0.91 | -3269, -1573, 603          |
| Atp1b2        | -0.9  | 648                        |
| Pcsk6         | -0.9  | 198504                     |
| Mtcl1         | -0.89 |                            |
| Hhatl         | -0.89 | 14011                      |
| Gucy2e        | -0.88 | 1406                       |
| Nrm           | -0.88 | 5370                       |
| Nkx2-3        | -0.87 | 2459                       |
| Flrt1         | -0.86 |                            |
| Ttll11        | -0.86 | 488                        |
| Ccdc96        | -0.86 | -716                       |

|         |       |                    |
|---------|-------|--------------------|
| Abhd3   | -0.85 | 184                |
| Fbxo32  | -0.84 | 156                |
| Atp8b5  | -0.84 | 115049             |
| Prrg2   | -0.84 | 15668, 13108, 9092 |
| Zbtb39  | -0.83 | 3486               |
| Plxdc1  | -0.83 | -2098              |
| Tmem30b | -0.83 | 347                |
| Tmem180 | -0.83 | -7920              |
| Tbx6    | -0.83 | -4459, 10645       |
| Itgae   | -0.82 | 47517              |
| Tyro3   | -0.82 | 422, 17542         |
| Pvrl1   | -0.82 | -528               |
| Pzca    | -0.81 | -5719              |
| Kcnn2   | -0.81 | -666               |
| Capn5   | -0.81 | 66897, 177         |
| Mycn    | -0.8  | 4364, 1836, 284    |
| Pcdhgb6 | -0.8  | 64882              |
| Kcnc4   | -0.8  | -1102              |
| Gckr    | -0.8  | -1869              |
| Cyp26b1 | -0.8  | 10004, 6292        |
| Tcf24   | -0.79 | 285                |
| Gamt    | -0.79 | 200                |
| Six2    | -0.79 | 446                |
| St8sia6 | -0.79 | -144               |
| Fam184b | -0.79 | 119149, 77         |
| Bpifc   | -0.78 | 54356, -10220      |
| Rph3al  | -0.78 |                    |
| Mcf2l   | -0.78 | 32043              |
| Lmln    | -0.77 | -5913, 135         |
| Hsbp1l1 | -0.77 | -9234              |
| Bcan    | -0.77 | 484                |
| Plxna1  | -0.77 | 789                |
| Adgrl1  | -0.77 |                    |
| Palm3   | -0.77 | -9890              |
| Erbp2   | -0.76 | 156                |
| Plxnc1  | -0.75 | 530, -558          |
| Iqgap2  | -0.75 | 273682, 306        |
| Jam2    | -0.75 | 181, 61333         |
| Fam60a  | -0.75 | 832                |
| Osbpl11 | -0.74 | 177, 66705         |
| Cacna1h | -0.74 | -521               |
| Pnkd    | -0.72 | 18902              |
| Rtn4rl1 | -0.72 | -9                 |
| Ppara   | -0.72 | 628                |
| Nol4l   | -0.72 |                    |
| Iqsec1  | -0.72 | 93899, 73163       |
| Pgpep1  | -0.72 | 282                |

|               |       |                                               |
|---------------|-------|-----------------------------------------------|
| Glyctk        | -0.72 |                                               |
| Pcsk4         | -0.7  | 14337, 7766, 6193, -799                       |
| Tmem245       | -0.7  | 517                                           |
| Phf13         | -0.7  | 7443, 1331, 243                               |
| Mbp           | -0.69 | 781                                           |
| Ass1          | -0.69 | 162                                           |
| Cadm1         | -0.69 | 1248                                          |
| Sema7a        | -0.69 | 260                                           |
| Bsn           | -0.69 | 96015, 84751                                  |
| Rara          | -0.68 | 176, 14000, 22880, 25984, 31136, 32160, 36117 |
| Ston2         | -0.68 | 7332                                          |
| Epdr1         | -0.68 | -3658                                         |
| Bricd5        | -0.68 | -2908                                         |
| Olfml2a       | -0.68 | -5900, -12                                    |
| Wipf3         | -0.68 |                                               |
| Nppc          | -0.67 | 77                                            |
| Fgf11         | -0.67 | 6009, 1209, 185, -999, -2663                  |
| Syngap1       | -0.67 | -8588, 31892                                  |
| Mphosph9      | -0.67 | 78339                                         |
| Bag4          | -0.67 | 30745, -231                                   |
| Trim67        | -0.67 | 1765                                          |
| Usf1          | -0.66 | 63                                            |
| E130309D14Rik | -0.66 | 18891, 29899                                  |
| Sp4           | -0.66 | -544                                          |
| Polr2a        | -0.65 | -8321                                         |
| Tmem200b      | -0.65 | -1483, 405                                    |
| Ung           | -0.65 | -2787, 93                                     |
| Wdr62         | -0.65 | 197                                           |
| Rab36         | -0.64 | 24415                                         |
| Pank1         | -0.64 | 959                                           |
| Hist2h2be     | -0.64 | -833                                          |
| Smad6         | -0.64 | 68187, 1611                                   |
| E2f2          | -0.63 | 150                                           |
| Lrrc4         | -0.63 | -625, 7711                                    |
| Zfp41         | -0.62 | -445                                          |
| Cdan1         | -0.62 | 93                                            |
| Smim1         | -0.62 | 13820                                         |
| Fam53b        | -0.62 | -500                                          |
| Zranb3        | -0.61 | -1112                                         |
| E2f1          | -0.61 | 268                                           |
| Sox18         | -0.61 | 344, -8904                                    |
| Ubn2          | -0.61 | 155                                           |
| Jmjd8         | -0.6  | 13, 4205, 7901, 13325                         |
| Dmrt1         | -0.6  | 374, 104982                                   |
| Palb2         | -0.6  | -222                                          |
| Exoc3l        | -0.6  | 5922, -1886                                   |
| E2f7          | -0.59 | 183                                           |

|               |       |                    |
|---------------|-------|--------------------|
| Rab11fip4     | -0.59 | 69540, 113044      |
| 2310009B15Rik | 0.59  | 15254              |
| 1600002K03Rik | 0.59  | -5104, -1088       |
| Irf1          | 0.59  | 162                |
| Kdelr3        | 0.59  | 200                |
| Tbc1d23       | 0.59  | 64298              |
| Slc39a6       | 0.59  | 201                |
| Chchd2        | 0.59  | 398                |
| Mars2         | 0.6   | 167                |
| Ralb          | 0.6   | 302                |
| Hmg20b        | 0.6   | -7303              |
| Lmna          | 0.6   | 20772, 308         |
| Tmem160       | 0.6   | 405                |
| Tgfb1         | 0.6   | 598                |
| Uap1          | 0.61  | -206               |
| Psmc7         | 0.61  | 146                |
| 14-Sep        | 0.61  |                    |
| Atp6v0b       | 0.61  | 65                 |
| Golt1b        | 0.61  | -283               |
| Med21         | 0.61  | 45                 |
| Uba5          | 0.61  | 177                |
| Slc35f5       | 0.62  | 40                 |
| Baz1a         | 0.62  | 1184, 576          |
| Pdlim7        | 0.62  | 25919, 95          |
| Pdia5         | 0.62  | 185                |
| Mical1        | 0.63  | 13862              |
| Slc39a13      | 0.63  | -307               |
| Bloc1s4       | 0.63  | 375                |
| Klf3          | 0.63  | -600, 157          |
| Cd9           | 0.63  | 515                |
| 2810428I15Rik | 0.63  | -3469              |
| Nod1          | 0.64  | 68                 |
| Mfhas1        | 0.64  | 1194               |
| Dyrk3         | 0.65  | 26                 |
| Abca7         | 0.65  | -8751              |
| Gpx4          | 0.65  | 474, 4314          |
| Ckap4         | 0.65  | 448                |
| Myo1g         | 0.65  | -7682              |
| Rel           | 0.65  | 202                |
| Gabarap       | 0.65  | -10074, 4534, 9398 |
| Adamts1       | 0.65  | 523                |
| Myl12a        | 0.65  | 12197, 325         |
| Lpin3         | 0.65  | -7870, 31458       |
| Rprml         | 0.66  | 379                |
| Flot1         | 0.66  | 12099, 13667       |
| Tbcc          | 0.66  | -605, 419          |
| Elovl1        | 0.66  | 9091               |

|               |      |                     |
|---------------|------|---------------------|
| Epha2         | 0.66 | 187, 7323           |
| Nudt19        | 0.66 | 728                 |
| Bet1l         | 0.66 | -321                |
| Pycr1         | 0.67 | 14134, 10902, 10006 |
| Ubttd1        | 0.67 | -35                 |
| Taok3         | 0.67 | -4481, 143, 121007  |
| Gars          | 0.67 | 175                 |
| Cope          | 0.67 | 143, 13167          |
| Shmt2         | 0.68 | -4436               |
| Dbil5         | 0.68 | -365                |
| Cox6a1        | 0.68 | 7963, 395           |
| Sap30         | 0.68 | 324                 |
| Rtn4          | 0.69 | 126                 |
| Nt5c          | 0.69 | 102                 |
| Ero1l         | 0.69 | 236                 |
| Golim4        | 0.69 | 255                 |
| Ocel1         | 0.69 | -3938, 158, 9758    |
| Arl4c         | 0.7  | 831                 |
| Tpgs1         | 0.7  | 270, 6110           |
| Nfkbia        | 0.7  | 247                 |
| Sec23a        | 0.7  | 257                 |
| Gjc2          | 0.71 | 6317, -8339         |
| Btg3          | 0.71 | 369                 |
| Eif6          | 0.71 | 301                 |
| Sec61b        | 0.71 | -565                |
| Ostf1         | 0.72 | 197                 |
| Rcn1          | 0.72 | 183                 |
| Fam210b       | 0.72 | 119                 |
| Srm           | 0.72 | 263                 |
| Mthfd2        | 0.72 | 164, -8476          |
| Myo1b         | 0.73 | 150                 |
| Trim7         | 0.73 | 11654               |
| Vamp5         | 0.73 | 18372, 68           |
| Esd           | 0.74 | 167                 |
| Tuba1a        | 0.74 | 61                  |
| Gorasp2       | 0.74 | 267                 |
| Rhoc          | 0.74 | 118                 |
| Srpr          | 0.74 | 157                 |
| 2310039H08Rik | 0.75 | 389                 |
| Plk3          | 0.75 | 4960                |
| Eif4ebp1      | 0.75 | 185                 |
| Acbd3         | 0.76 | 37                  |
| Nfkbiz        | 0.76 | 16593               |
| Atp11a        | 0.76 | 392                 |
| Wnt2b         | 0.77 | 280                 |
| Jun           | 0.77 | 1438                |
| Herpud1       | 0.77 | 92                  |



|          |      |                   |
|----------|------|-------------------|
| Tfrc     | 0.78 | 336               |
| H2afj    | 0.78 | 200               |
| Slc1a5   | 0.78 | 926               |
| Rras     | 0.78 | -10060            |
| Spty2d1  | 0.78 | 222               |
| Slc37a1  | 0.79 | 837               |
| Rcn3     | 0.79 | 15573             |
| Samd4    | 0.8  | 139, 1851         |
| Efnb2    | 0.8  | -699              |
| S100a13  | 0.81 | -5379             |
| Rorc     | 0.81 | -9146             |
| Slc25a33 | 0.81 | 347               |
| Tubb2a   | 0.82 | 24                |
| Sec22b   | 0.82 | 149               |
| Ogfod2   | 0.82 | 3934, 8910        |
| Cib1     | 0.82 | 40                |
| Phospho1 | 0.83 | -212, 6732        |
| Tspo     | 0.83 | 278               |
| Rabac1   | 0.83 | 504               |
| Vmo1     | 0.84 | -5640             |
| Plk2     | 0.84 | -4                |
| Itga6    | 0.84 | 213               |
| Odc1     | 0.85 | 439               |
| Cxadr    | 0.85 | 69                |
| Syt7     | 0.85 | 67838             |
| Fxyd5    | 0.85 | -10542            |
| Arfgap3  | 0.87 | 295               |
| Hmga1    | 0.87 | -1326, 205, 9282  |
| Ppp1r35  | 0.87 | 666, 6330         |
| Furin    | 0.87 | 3447, 2327        |
| Daam1    | 0.88 | 154               |
| Prr13    | 0.89 | 11774             |
| Runx2    | 0.89 | 78797, 37773      |
| Coq10b   | 0.9  | 147               |
| Lrrc59   | 0.91 | 128               |
| Dusp3    | 0.91 | 439               |
| Timm10b  | 0.91 | 10628             |
| Aif1     | 0.93 | 14929, 11201      |
| Galnt16  | 0.94 | -302, 258         |
| Prr18    | 0.94 | 970               |
| Fstl3    | 0.95 | -10586            |
| Fkbp1a   | 0.95 | 173               |
| Atf5     | 0.95 | 114               |
| Ptpn7    | 0.96 | 14635             |
| Sdc4     | 0.96 | -12               |
| Adamts15 | 0.97 | 18174, 6638, -530 |
| Tagln2   | 0.98 | 10                |

|         |      |                                 |
|---------|------|---------------------------------|
| Chrnbl  | 0.98 | 321, -4479, -5503, -6687, -8351 |
| Cd68    | 0.99 | -5842                           |
| Arpc1b  | 1.01 | 624                             |
| Trim66  | 1.01 | 69222                           |
| Fjx1    | 1.02 | 880                             |
| Csf1    | 1.02 | 341                             |
| Panx1   | 1.02 | 70                              |
| Gas2l1  | 1.03 | 7151, 3855, 495                 |
| Lyve1   | 1.03 | 18665                           |
| Ly6g5b  | 1.05 | -6392                           |
| Gdf15   | 1.05 | 211                             |
| Foxp2   | 1.06 | 379                             |
| Fam132b | 1.07 | -30                             |
| Ust     | 1.07 | 105                             |
| Gltpd2  | 1.07 | 1047                            |
| Tex40   | 1.07 | -8444                           |
| Slc1a4  | 1.08 | 409                             |
| Sqstm1  | 1.08 | 102                             |
| Kcnk13  | 1.08 | 1389                            |
| Lonp1   | 1.08 | 13383, 231                      |
| Psmc8   | 1.09 | 9409                            |
| Esyt3   | 1.11 | 258                             |
| Apoc2   | 1.13 | 12032                           |
| Stac2   | 1.16 | 26326, 822                      |
| Tbr1    | 1.16 | 1211                            |
| Cebpb   | 1.16 | 845                             |
| Rdh10   | 1.17 | -282                            |
| Klhdc8a | 1.17 | 371, 17683                      |
| Npw     | 1.17 | 8361                            |
| Scand1  | 1.17 | 368                             |
| Il6ra   | 1.18 | 282                             |
| Dok3    | 1.19 | 15194                           |
| Steap1  | 1.22 | 69                              |
| Chpf2   | 1.23 | -9406, 82, 15874                |
| Cdr2    | 1.23 | 168                             |
| Jdp2    | 1.24 | 575                             |
| Tesc    | 1.24 | 1168                            |
| Cdr2l   | 1.27 | 436, 22020                      |
| Slc35c1 | 1.27 | 902                             |
| Atp1b1  | 1.28 | 515                             |
| Slc11a1 | 1.29 | 9501, 17277                     |
| Tnip1   | 1.32 | 7036                            |
| Rrad    | 1.32 | 457                             |
| Nfkbie  | 1.34 | -10836, 8508, 17148             |
| Creb3   | 1.37 | -362                            |
| Fam43b  | 1.37 | 730                             |
| Isg15   | 1.39 | 3618                            |

|               |      |                             |
|---------------|------|-----------------------------|
| Slc16a5       | 1.4  | 13287                       |
| Baiap2l1      | 1.41 | 102528                      |
| Ctgf          | 1.42 | 1006                        |
| Fdx1l         | 1.42 | 74                          |
| Pmm1          | 1.45 | 355                         |
| Ptprcap       | 1.51 | -5910                       |
| Slc22a4       | 1.53 | 48026                       |
| Gale          | 1.53 | -1341, 7219                 |
| Ptprn         | 1.55 | 27408                       |
| Kcnk6         | 1.55 | 170                         |
| 2900026A02Rik | 1.56 |                             |
| Prkca         | 1.57 | 496                         |
| Btg2          | 1.59 | 243                         |
| Myc           | 1.6  | 403, 2659                   |
| Relb          | 1.62 | 9854, 270                   |
| Sowahb        | 1.63 | 574                         |
| Rhbdf2        | 1.64 | -2933                       |
| Zfp365        | 1.67 | 342                         |
| Nes           | 1.68 | 731                         |
| 6030419C18Rik | 1.69 | 197                         |
| Pdgfb         | 1.7  | 1912                        |
| Sntb1         | 1.71 | 357                         |
| Gadd45b       | 1.72 | -1355, 341, 1845            |
| Gadd45a       | 1.73 | 127                         |
| AA467197      | 1.78 | -7007                       |
| Nlrp10        | 1.78 | -4418                       |
| Gm13889       | 1.81 | -52                         |
| Maff          | 1.84 | 18, 9954                    |
| Sh3bgr        | 1.89 | -8374                       |
| Mvp           | 1.93 | 37954, -2142, -8590, -10830 |
| Gch1          | 1.95 | 218                         |
| Ltbp1         | 1.96 | 327                         |
| Fosl1         | 2    | 9518, 12942                 |
| Ntn4          | 2.08 | 39                          |
| Bbc3          | 2.09 | 529, 2705, 4241             |
| Mocos         | 2.2  | 56117                       |
| Nfe2l3        | 2.2  | 690                         |
| Dusp8         | 2.27 | 948                         |
| Pde6g         | 2.28 | 16203, -4661                |
| Cited4        | 2.29 | 349                         |
| Tes           | 2.31 | 115                         |
| Lrrc14b       | 2.32 | 13824                       |
| Sema3d        | 2.41 | 338                         |
| Spsb4         | 2.45 | -365                        |
| Mmp24         | 2.46 | 51280                       |
| Dusp4         | 2.47 | 454                         |
| Cdkn1a        | 2.49 | 3606                        |

|         |      |                |
|---------|------|----------------|
| Srxn1   | 2.64 | 316            |
| Cyr61   | 2.66 | 529            |
| Klhl30  | 2.82 | -5761, 15327   |
| Wnt11   | 2.84 | -3565          |
| Trib3   | 3.08 | 11884          |
| Arid5a  | 3.24 | 75             |
| Lrp8    | 3.3  | 1325           |
| Rasl10a | 3.65 | 48, 3344, 6704 |

eq (P-value  $< 0.05$ ,  $|\text{Log}_2\text{FC}| \geq 0.59$ ) and ChIP-Seq analyses using the *Arid4b* SCKO testes at P1.5





















i.

**Supporting Information Table S5. Primary antibodies for immunofluorescent staining**

| Antibodies   | Clone                           | Cat #     | Company           | Dilution |
|--------------|---------------------------------|-----------|-------------------|----------|
| Anti-ARID4B  |                                 | A302-233A | Bethyl            | 1,000x   |
| Anti-AMH     | Anti-MIS (C-20)                 | sc-6886   | Santa Cruz        | 200x     |
| Anti-WT1     | C-19                            | sc-192    | Santa Cruz        | 400x     |
| Anti-TRA98   |                                 | ab82527   | Abcam             | 200x     |
| Anti-PLZF    | H-300                           | sc-22839  | Santa Cruz        | 200x     |
| Anti-Casp3   | Cleaved Caspase-3 (Asp175)      | 9661      | Cell Signaling    | 300x     |
| Anti-pH3     | Anti-phospho histone H3 (Ser10) | 06-570    | Millipore         | 200x     |
| Anti-GJA1    | Anti-Connexin 43                | ab11370   | Abcam             | 1,000x   |
| Anti-GDNF    | D-20                            | sc-328    | Santa Cruz        | 200x     |
| Anti-INHA    |                                 | MA5-15703 | Thermo Scientific | 200x     |
| Anti-CYP26B1 |                                 | ab113236  | Abcam             | 100x     |
| Anti-KITL    | SCF (G-3)                       | sc-13126  | Santa Cruz        | 200x     |
| Anti-ACTA2   | 1A4                             | A5228     | Sigma-Aldrich     | 200x     |



**Supporting Information Table S6. TaqMan primer/probe sets for qRT-PCR**

|                |               |
|----------------|---------------|
| <i>Arid4a</i>  | Mm01282759_m1 |
| <i>Notch1</i>  | Mm00435249_m1 |
| <i>Amh</i>     | Mm00431795_g1 |
| <i>Gjal</i>    | Mm00439105_m1 |
| <i>Gdnf</i>    | Mm00599849_m1 |
| <i>Inhbb</i>   | Mm03023992_m1 |
| <i>Inha</i>    | Mm00439683_m1 |
| <i>Cyp26b1</i> | Mm00558507_m1 |
| <i>Kitl</i>    | Mm00442972_m1 |
| <i>Gapdh</i>   | Mm99999915_g1 |

**Supporting Information Table S7. Primer sequences for ChIP-qPCR****Primers for ChIP-qPCR***Gdnf*

|          |                                |
|----------|--------------------------------|
| Gdnf-PF1 | 5'-GGTGTTCAGCTAACCAACAGGAG-3'  |
| Gdnf-PR1 | 5'-GGCATAAACCTGCCTTTGTTCAAG-3' |
| Gdnf-PF2 | 5'-CTTGAACAAAGGCAGGTTTATGCC-3' |
| Gdnf-PR2 | 5'-CAGACCTAGGCTTCATTTCCATG-3'  |
| Gdnf-PF3 | 5'-CATGGAAATGAAGCCTAGGTCTG-3'  |
| Gdnf-PR3 | 5'-CATTTATAGAGCTCTCACTGCGTG-3' |
| Gdnf-PF4 | 5'-CAGATATTTGGAGACCGTGTTGG-3'  |
| Gdnf-PR4 | 5'-CAAGCAGCCTGCACCGAGAAG-3'    |

*Snrpn*

|             |                                 |
|-------------|---------------------------------|
| Snrpn-ex1-F | 5'-GAGTGATTTGCAACGCAATGGAGCG-3' |
| Snrpn-ex1-R | 5'-CTAACACACCCAAGGAGTCCGTCTG-3' |
| Snrpn-ex7-F | 5'-ACTGGCATTGCTCGTGTGCCTC-3'    |
| Snrpn-ex7-R | 5'-GCCTCCAACCTGCTCGGACAGG-3'    |
